# Supplementary material
Source: PubMed Central journal article supplement (PMC2396920)
Supplement: JCI0833715sd.pdf [file JCI0833715sd.pdf]

## Supplementary Methods:

Supplementary Text Box 1. The R script below reads in raw affymetrix data, normalizes the intensities, and then computes Pax3 associated fold-change and p-values.

```
library(affydata);library(affyPLM);library(affy);library(limma);library(cluster);
library(annotate);
```

```
ReadAffyAndCov <- function(covName)
{load("jointnormalize.rdat");
sampleCov <- makeCov(covName)
temp2 <-
new("phenoData",pData=sampleCov,varLabels=as.list(sampleCov
[0,]))
phenoData(temp) <- temp2
return (temp)
}
```

```
makeCov <- function(covName) {
Cov <- read.table(covName, sep=",",header=TRUE)
nrow=dim(Cov)[[1]]
return(Cov)
}
```

```
makeTableFTLDhits <- function(Y)
{
nGene <- length(geneNames(Y));
design <- model.matrix(~Pax3.Expression + litterID,
data=pData(Y))
fit <- lmFit(Y, design)
fit <- eBayes(fit)
temp = topTable(fit, coef=2,
number=nGene,adjust.method="none")
return(temp)
}
```

```
files=c("E1.cel", "e3.cel", "e6.cel", "e8.cel", "e4.cel",
"e7.cel", "e2.cel", "e11.cel");
temp <- ReadAffy(filename=paste(files,sep=""))
nfiles=length(files);
```

```
#####RMA Normalize#####
temp <- rma(temp) #rma normalization
save(temp,files,file="jointnormalize.rdat");
```

```
#####Compute fold changes
Covariate_File="input.csv";
```

```
A <- ReadAffyAndCov(Covariate_File)
TableFTLD <- makeTableFTLDhits(A)
write.table(TableFTLD, "output.csv", sep=",", quote=FALSE,
row.names=FALSE)
```

```
#####input.csv:#####
#Sample ID,Pax3 Expression,litterID
#B1,Y,1
#B3,Y,1
#B6,N,1
#B8,N,1
#B4,Y,2
#B7,Y,2
#B2,N,2
#B11,N,2
```

Figure S1

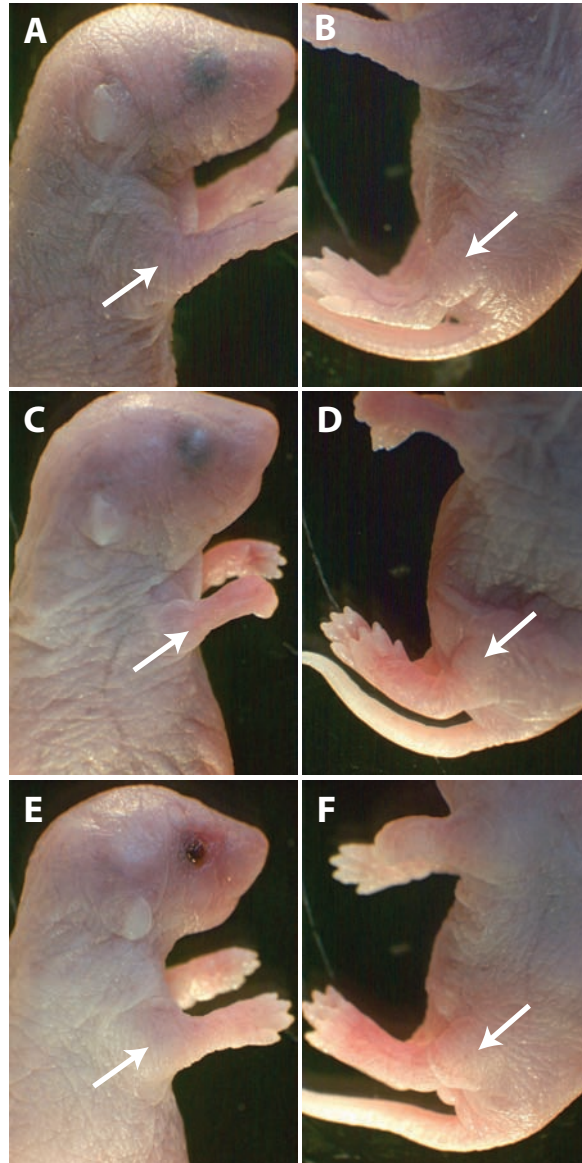

Figure S1.  $Pax3^{Cre/Cre}$ ,  $R26^{Pax3/Pax3}$  newborn mice have rescued hindlimb musculature (arrow, D), but fail to rescue the musculature of the forelimbs (arrow, C) compared to wild type  $Pax3^{+/+}$ ,  $R26^{Pax3/+}$  littermates (A and B). Expression of two copies of R6Pax3 has no obvious effect on limb muscle development in a  $Pax3$  heterozygous background ( $Pax3^{Cre/+}$ ,  $R26^{Pax3/Pax3}$ , E and F).

Figure S2

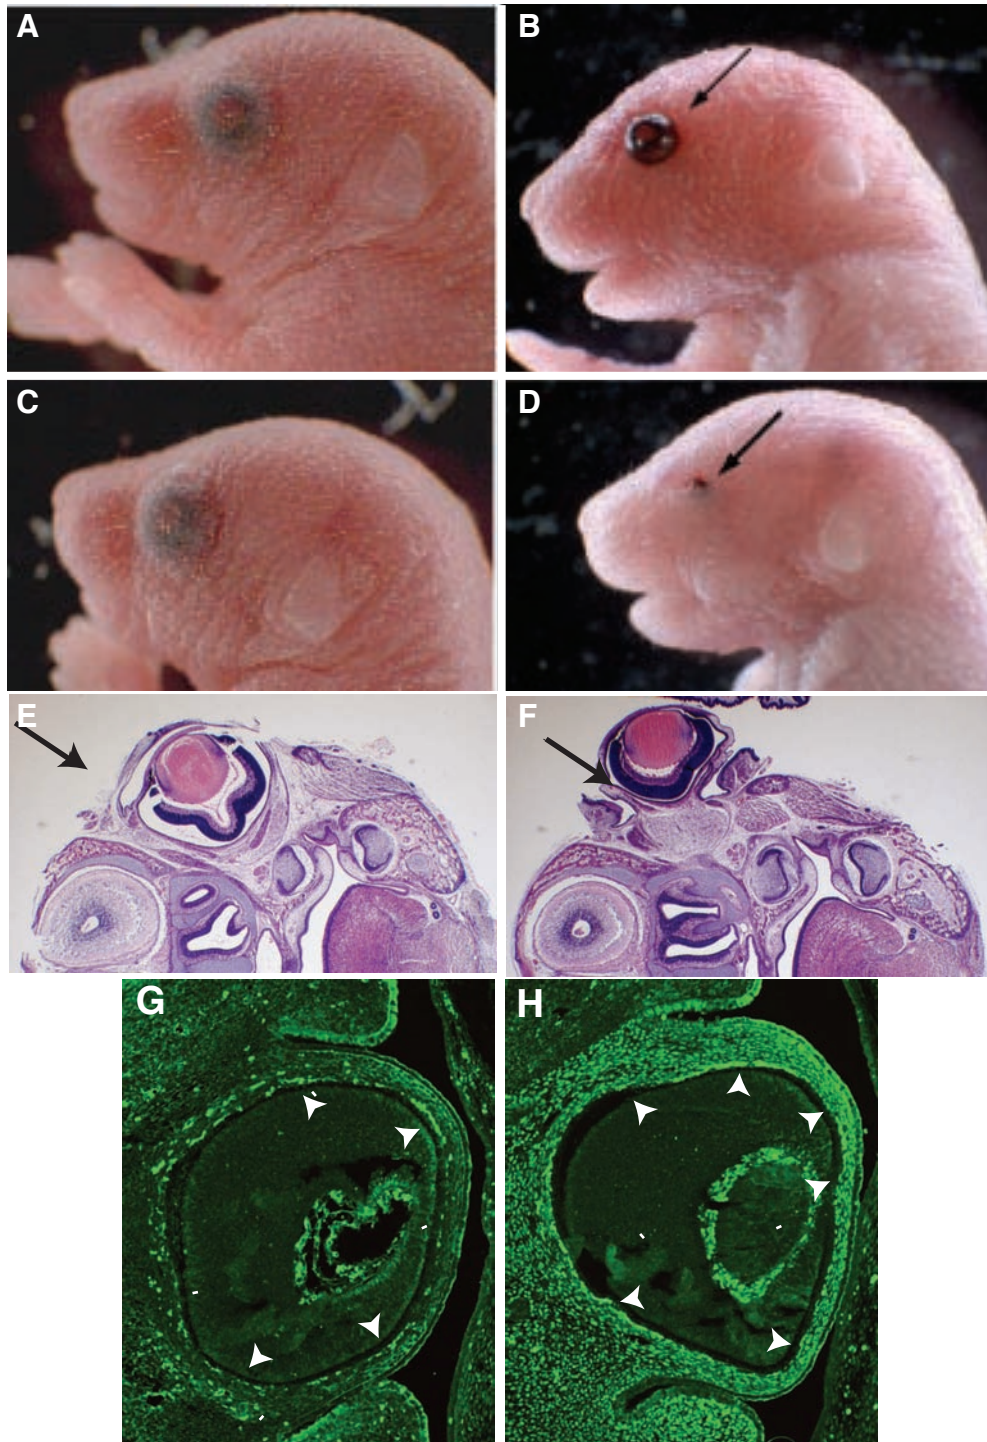

Figure S2.  $Pax3^{Cre/+}$ ,  $R26^{Pax3/Pax3}$  P0 mice display severe eyelid defects seen grossly (arrows, B and D) and in histological sections (arrow, F).  $Pax3^{Cre/+}$ ,  $R26^{Pax3/+}$  littermates have normal fused eyelids (A, C, and E).  $Pax3$  is robustly expressed in tissue surrounding the developing eye at E13.5 in  $Pax3^{Cre/+}$ ,  $R26^{Pax3/Pax3}$  embryos (arrows, H). Expression is significantly lower in control  $Pax3^{+/+}$ ,  $R26^{+/+}$  littermates (arrows, G).



Figure S3

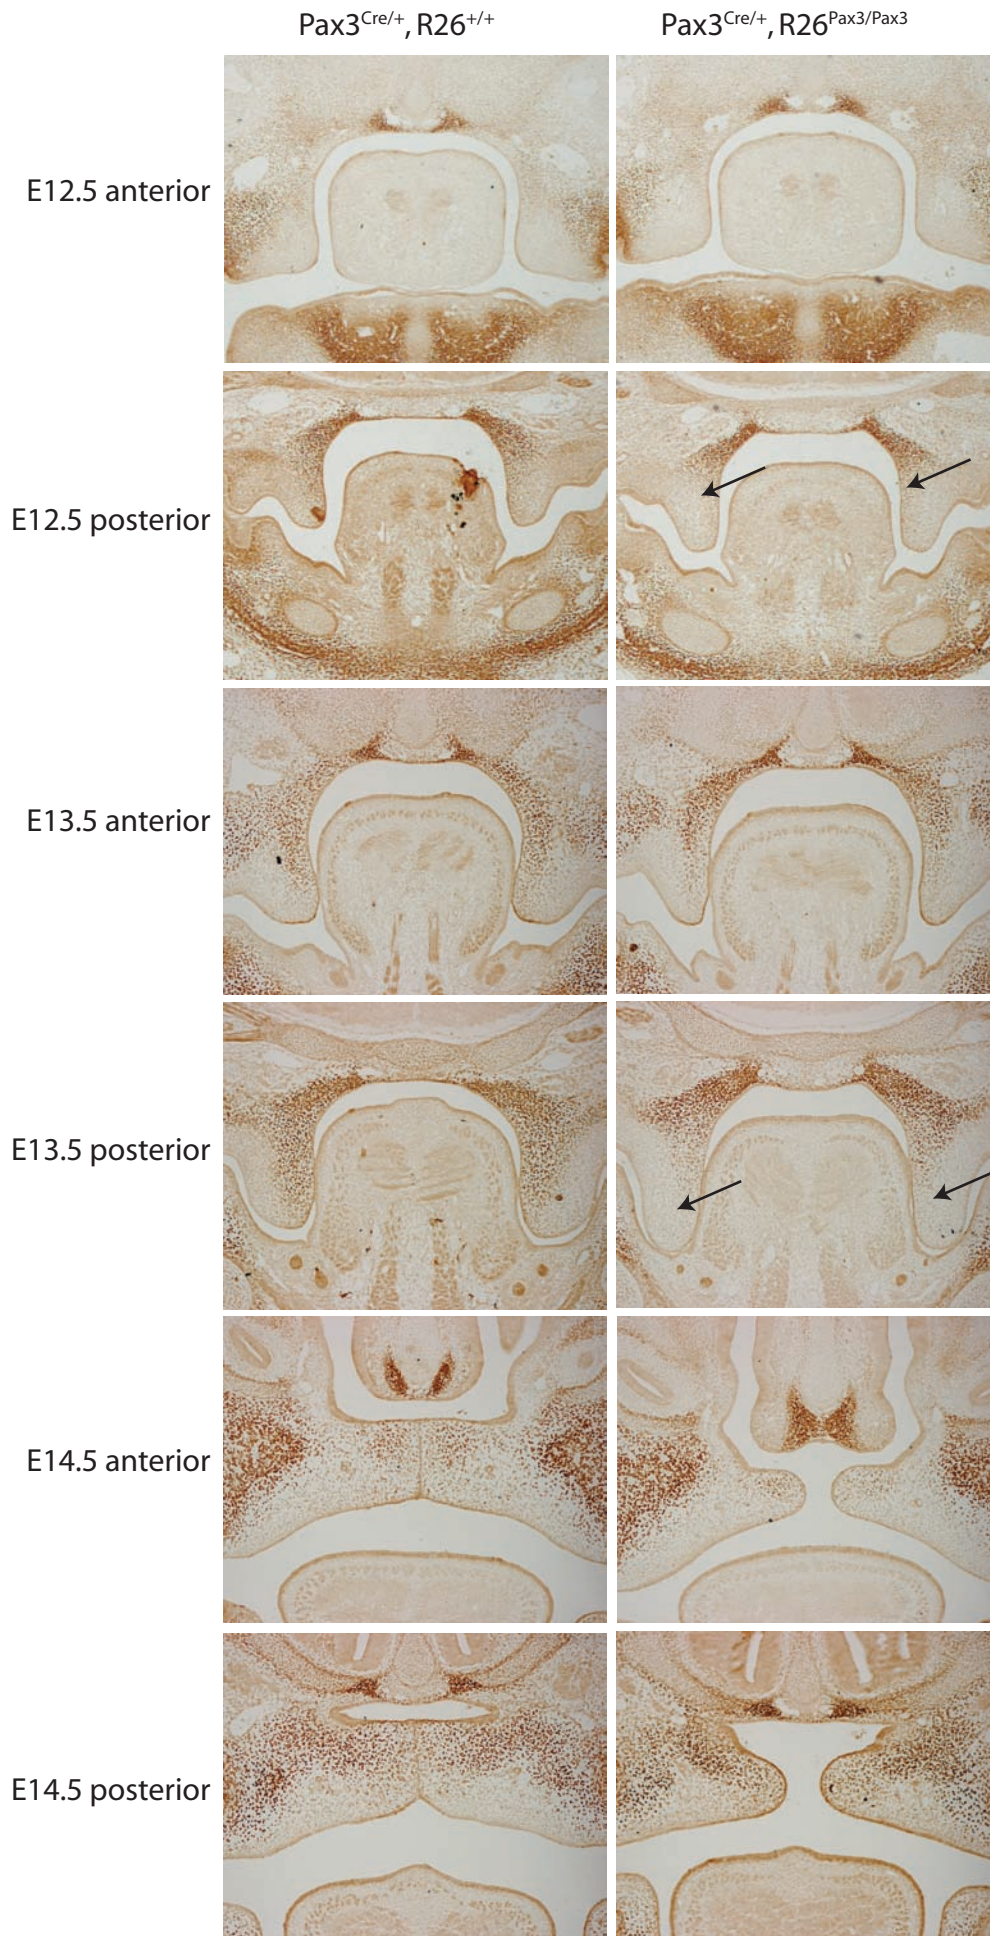

Figure S3.  
Frontal sections of E12.5, 13.5 and 14.5 embryos stained with anti-Runx2 antibodies. Matched anterior and posterior palate sections demonstrate a marked reduction in Runx2 protein levels in the mutant  $Pax3^{Cre/+}, R26^{Pax3/Pax3}$  palatal shelved compared to control  $Pax3^{Cre/+}, R26^{+/+}$  littermates, with a more pronounced decrease observed in posterior sections.



Figure S4

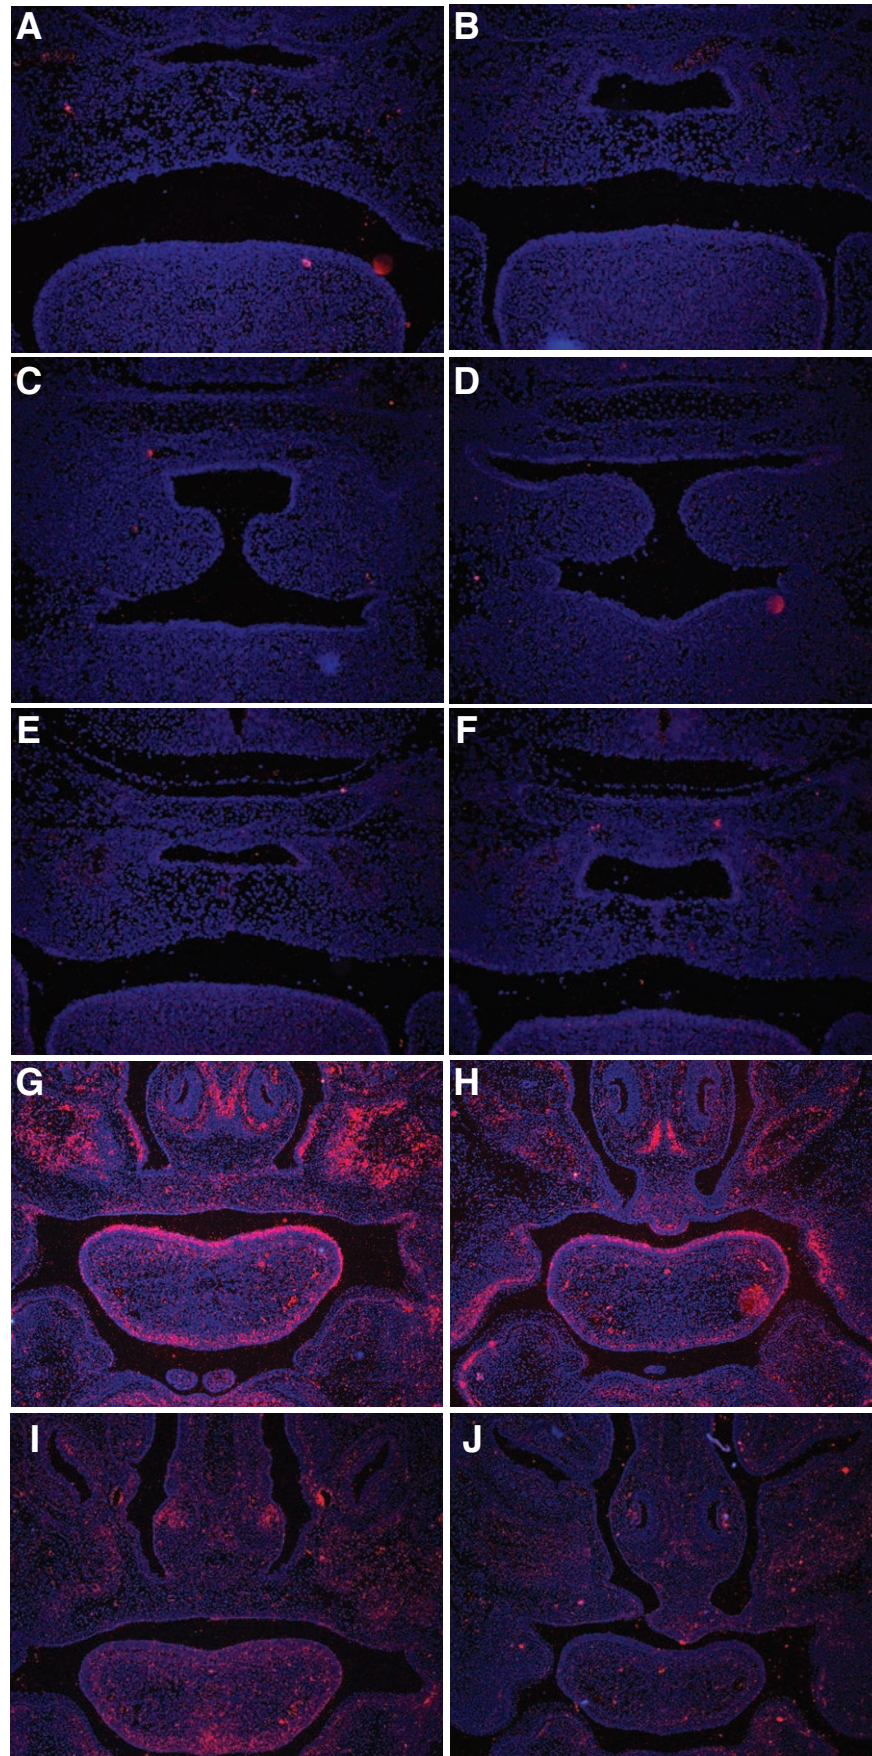

Figure S4. In-situ hybridization on frontal sections of E14.5 embryos shows similar levels of BMPR-1a (A, B), BMPR-1b (C, D), BMPR-2 (E, F); BMP-2 (G, H), and BMP-4 (I, J) expression in Pax3<sup>Cre/+</sup>, R26<sup>Pax3/Pax3</sup> (B, D, F, H, and J) compared to control Pax3<sup>+/+</sup>, R26<sup>Pax3/+</sup> (A, C, and E) and Pax3<sup>Cre/+</sup>, R26<sup>+/+</sup> (G and I) littermates.



Figure S5

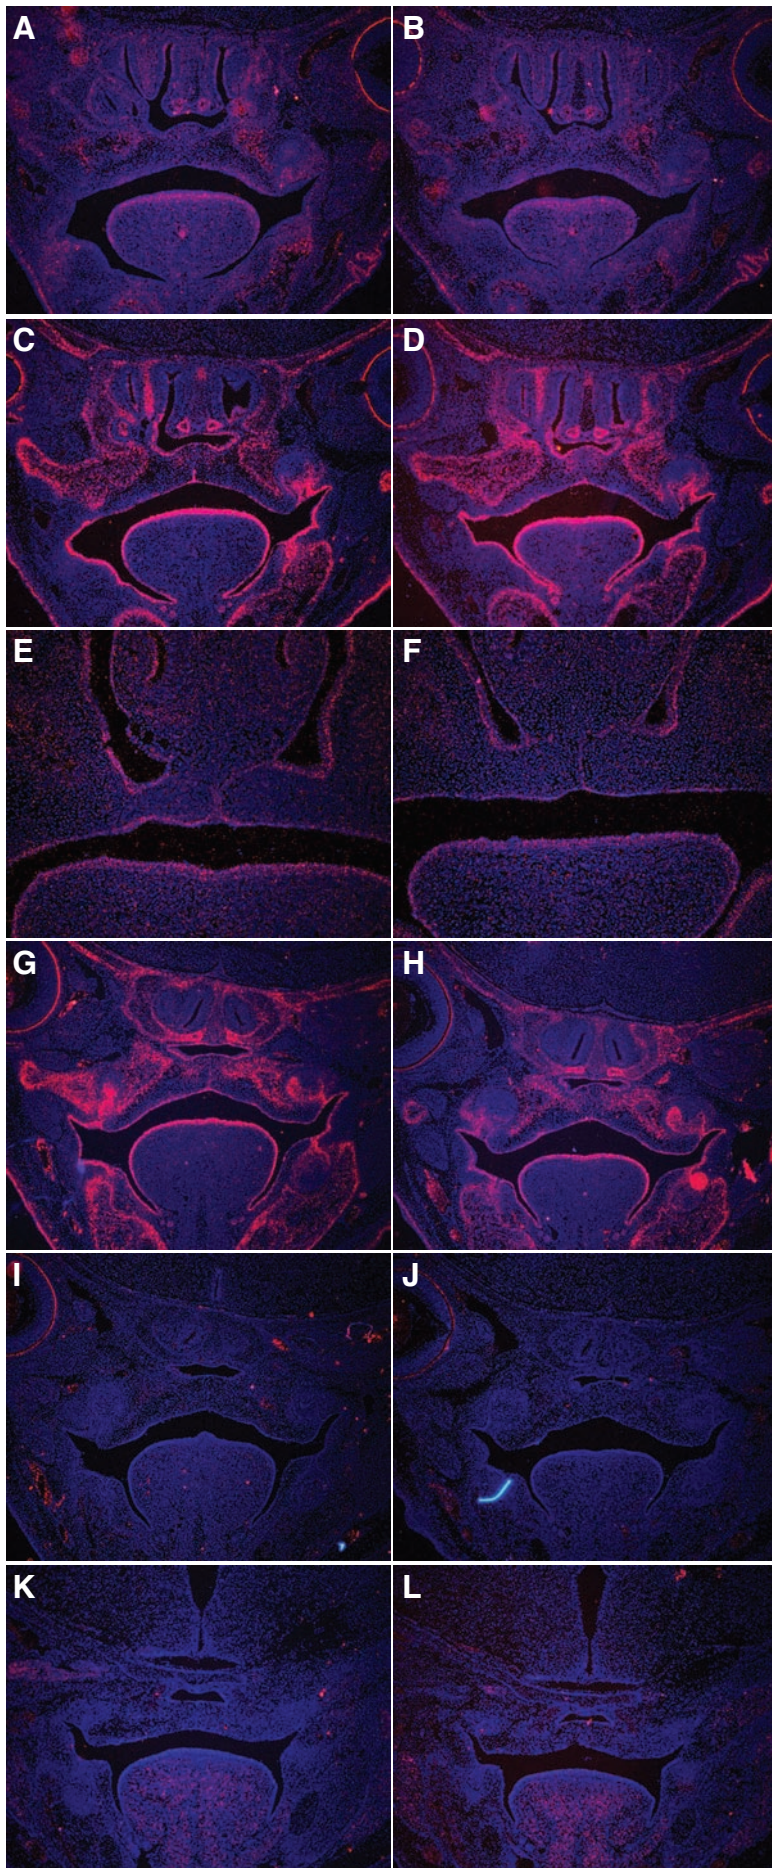

Figure S5.  
In-situ hybridization on E14.5 frontal sections show similar levels of FGFR-1 (A, B), FGFR-2 (C, D), FGFR-2b (E, F), FGFR-2c (G, H), FGFR-3 (I, J), and FGFR-4 (K, L) in Pax3<sup>Cre/+</sup>, R26<sup>Pax3/Pax3</sup> (B, D, F, H, J, and L) compared to control Pax3<sup>Cre/+</sup>, R26<sup>Pax3/+</sup> littermates (A, C, E, G, I, and K).



Figure S6

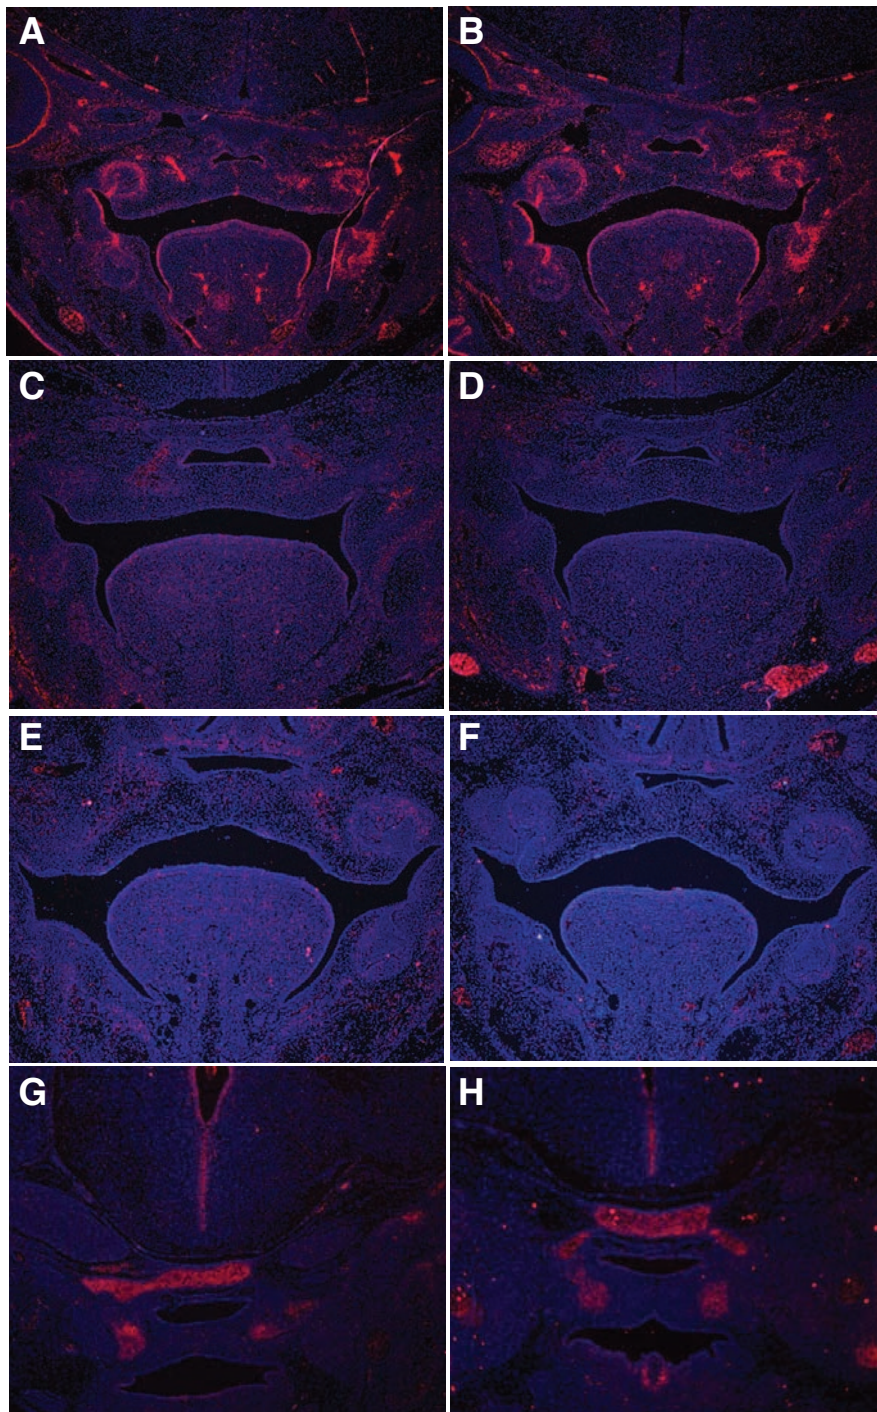

Figure S6.

In-situ hybridization on frontal sections of E14.5 embryos show similar levels of Jagged-1 (A, B), Pax9 (C, D), Snail (E, F), and Sox9 (G, H) in Pax3<sup>Cre/+</sup>, R26<sup>Pax3/+</sup> (B, D, and F) and Wnt1Cre, R26<sup>Pax3/Pax3</sup> (H) compared with control Pax3<sup>Cre/+</sup>, R26<sup>Pax3/+</sup> (A, C, and E) and Wnt1Cre, R26<sup>Pax3/+</sup> (G) littermates.



Table S1

|                        | $Pax3^{Cre/+}$ ,<br>$R26^{Pax3/Pax3}$ | $Pax3^{Cre/+}$ , $R26^{+/?}$ | $Pax3^{+/+}$ , $R26^{?/?}$ | $Pax3^{Cre/Cre}$ , $R26^{?/?}$ | total |
|------------------------|---------------------------------------|------------------------------|----------------------------|--------------------------------|-------|
| expected ratio         | 1/8                                   | 3/8                          | 1/4                        | 1/4                            |       |
| Adult: observed        | 0                                     | 23                           | 21                         | 0                              | 44    |
| expected               | 5.5                                   | 16.5                         | 11                         | 11                             |       |
| New born: observed     | 26                                    | 65                           | 65                         | 19                             | 175   |
| expected               | 21.875                                | 65.625                       | 43.75                      | 43.75                          |       |
| alive at P2: observed  | 0                                     | 65                           | 65                         | 0                              | 130   |
| expected               | 16.25                                 | 48.75                        | 32.5                       | 32.5                           |       |
| E11.5 - 17.5: observed | 38                                    | 108                          | 67                         | 49                             | 262   |
| expected               | 32.75                                 | 98.25                        | 65.5                       | 65.5                           |       |

\*  $Pax3^{Cre/+}$ ,  $R26^{+/?}$  (column2) mice were all essentially wild type and encompass the following genotypes:  $Pax3^{Cre/+}$ ,  $R26^{+/+}$  and  $Pax3^{Cre/+}$ ,  $R26^{Pax3/+}$ .

\*\*  $Pax3^{+/+}$ ,  $R26^{?/?}$  (column 3) mice were all essentially wild type and encompass the following genotypes:  $Pax3^{+/+}$ ,  $R26^{+/+}$ ;  $Pax3^{+/+}$ ,  $R26^{Pax3/+}$ ; and  $Pax3^{+/+}$ ,  $R26^{Pax3/Pax3}$ .

Supplemental Table 2: R script output

| ID:Affy probe set | log Fold Change | Ave Expression | t            | P.Value     | adj.P.Val   | B factor     |
|-------------------|-----------------|----------------|--------------|-------------|-------------|--------------|
| 1420389_at        | 2.258285765     | 9.023676478    | 28.05817407  | 2.19E-10    | 2.19E-10    | 4.744319322  |
| 1431708_a_at      | -3.48070954     | 7.948481985    | -25.38837826 | 5.55E-10    | 5.55E-10    | 4.658934453  |
| 1430335_a_at      | 2.253625246     | 8.029517624    | 22.62484088  | 1.61E-09    | 1.61E-09    | 4.539954821  |
| 1452239_at        | -4.235287493    | 6.949118188    | -20.96610079 | 3.26E-09    | 3.26E-09    | 4.447415263  |
| 1424176_a_at      | 0.811155385     | 7.624340962    | 11.66231335  | 6.66E-07    | 6.66E-07    | 3.223043167  |
| 1421947_at        | 0.764291384     | 8.279176117    | 10.79132162  | 1.32E-06    | 1.32E-06    | 2.978169358  |
| 1418350_at        | 0.878762777     | 7.088659733    | 10.41398221  | 1.80E-06    | 1.80E-06    | 2.858797734  |
| 1442893_at        | 0.673752902     | 5.993662746    | 9.621009306  | 3.58E-06    | 3.58E-06    | 2.577342167  |
| 1453586_at        | 0.711730168     | 6.857411055    | 8.926761674  | 6.79E-06    | 6.79E-06    | 2.291580749  |
| 1436532_at        | 0.873141328     | 5.097688819    | 8.248183564  | 1.32E-05    | 1.32E-05    | 1.970320652  |
| 1423505_at        | 0.671585939     | 8.727522678    | 7.812702395  | 2.08E-05    | 2.08E-05    | 1.739076252  |
| 1416053_at        | 0.875694655     | 8.894187243    | 7.664284286  | 2.43E-05    | 2.43E-05    | 1.655342806  |
| 1423271_at        | 0.789812691     | 7.815856772    | 7.64194451   | 2.49E-05    | 2.49E-05    | 1.642512733  |
| 1422308_a_at      | 0.589217275     | 7.298002736    | 7.605470437  | 2.59E-05    | 2.59E-05    | 1.621435744  |
| 1418061_at        | -0.702123839    | 7.183135634    | -7.153203193 | 4.26E-05    | 4.26E-05    | 1.346247397  |
| 1429123_at        | 0.628349378     | 6.20404519     | 7.003223476  | 5.06E-05    | 5.06E-05    | 1.249068849  |
| 1437230_at        | 0.606911106     | 5.285382541    | 6.896709974  | 5.72E-05    | 5.72E-05    | 1.178171956  |
| 1451240_a_at      | -0.637572758    | 9.721673695    | -6.886966328 | 5.78E-05    | 5.78E-05    | 1.17160697   |
| 1456212_x_at      | 0.539913312     | 6.70198656     | 6.756255208  | 6.73E-05    | 6.73E-05    | 1.082227674  |
| 1423578_at        | -0.710494192    | 8.312215837    | -6.727431152 | 6.97E-05    | 6.97E-05    | 1.06218613   |
| 1423935_x_at      | 0.708543509     | 10.78336213    | 6.71188883   | 7.09E-05    | 7.09E-05    | 1.051329108  |
| 1460347_at        | 0.647926884     | 10.02844635    | 6.641531839  | 7.71E-05    | 7.71E-05    | 1.001736887  |
| 1427527_a_at      | 0.687439585     | 6.307390524    | 6.491701154  | 9.23E-05    | 9.23E-05    | 0.893661344  |
| 1438452_at        | 0.604139077     | 8.059476386    | 6.437107879  | 9.86E-05    | 9.86E-05    | 0.853433461  |
| 1455899_x_at      | 0.636721143     | 7.973836789    | 6.42270022   | 0.00010031  | 0.00010031  | 0.842740294  |
| 1449152_at        | 0.851886749     | 6.459603804    | 6.381158539  | 0.000105517 | 0.000105517 | 0.811728144  |
| 1449417_at        | -0.847438079    | 6.156529546    | -6.215767553 | 0.00012935  | 0.00012935  | 0.685564422  |
| 1448529_at        | -0.383899505    | 8.073777666    | -6.132915455 | 0.000143433 | 0.000143433 | 0.620715376  |
| 1455785_at        | 0.799702403     | 6.21835501     | 5.951313323  | 0.000180465 | 0.000180465 | 0.474628504  |
| 1441429_at        | -0.398782543    | 4.809231411    | -5.95055805  | 0.000180639 | 0.000180639 | 0.474009452  |
| 1422616_s_at      | -0.625549527    | 5.658877186    | -5.896937661 | 0.000193477 | 0.000193477 | 0.429813736  |
| 1437403_at        | 0.58995291      | 8.229709032    | 5.857467471  | 0.000203557 | 0.000203557 | 0.39696915   |
| 1420739_at        | -0.464288378    | 5.218033681    | -5.825340168 | 0.00021218  | 0.00021218  | 0.370038272  |
| 1419647_a_at      | 0.782827777     | 7.831857286    | 5.812485805  | 0.000215741 | 0.000215741 | 0.359213405  |
| 1436521_at        | -0.879459715    | 6.642465928    | -5.787963996 | 0.000222713 | 0.000222713 | 0.338484243  |
| 1448895_a_at      | 0.454742773     | 5.049643619    | 5.785968662  | 0.000223291 | 0.000223291 | 0.336792949  |
| 1447277_s_at      | 0.377610397     | 10.62397381    | 5.774500112  | 0.000226645 | 0.000226645 | 0.327058571  |
| 1422784_at        | 0.885940413     | 9.838124583    | 5.7679917    | 0.000228572 | 0.000228572 | 0.321524176  |
| 1449519_at        | 0.631281232     | 5.605771051    | 5.739876958  | 0.000237104 | 0.000237104 | 0.297532484  |
| 1440581_at        | 0.729050069     | 4.482039183    | 5.695122613  | 0.000251402 | 0.000251402 | 0.259057329  |
| 1429029_at        | -0.733402236    | 7.115839782    | -5.665582301 | 0.000261349 | 0.000261349 | 0.2334695    |
| 1422783_a_at      | 0.91137342      | 9.356301829    | 5.627729341  | 0.00027472  | 0.00027472  | 0.200456731  |
| 1418349_at        | 0.593882956     | 6.185297122    | 5.56164494   | 0.000299866 | 0.000299866 | 0.14221414   |
| 1418507_s_at      | 0.458578408     | 8.841131506    | 5.522531687  | 0.000315911 | 0.000315911 | 0.107375445  |
| 1438782_at        | -0.859865346    | 5.711214147    | -5.463649793 | 0.000341836 | 0.000341836 | 0.054410524  |
| 1450344_a_at      | 0.421170755     | 5.035530976    | 5.420764946  | 0.000362159 | 0.000362159 | 0.015440975  |
| 1440516_at        | -0.376007611    | 5.229371333    | -5.391066321 | 0.000376993 | 0.000376993 | -0.011741955 |
| 1423607_at        | -0.395370606    | 12.47644247    | -5.375210607 | 0.00038518  | 0.00038518  | -0.026320387 |
| 1427700_x_at      | 0.759648414     | 8.93923544     | 5.374457776  | 0.000385574 | 0.000385574 | -0.027013713 |
| 1442140_at        | -0.711477913    | 8.90660248     | -5.371928953 | 0.000386898 | 0.000386898 | -0.029343415 |



|              |              |             |              |             |             |              |
|--------------|--------------|-------------|--------------|-------------|-------------|--------------|
| 1415904_at   | -0.387044582 | 9.095732283 | -5.345417378 | 0.000401086 | 0.000401086 | -0.053837856 |
| 1430353_at   | 0.575436113  | 5.817390228 | 5.343281889  | 0.000402253 | 0.000402253 | -0.055816468 |
| 1422324_a_at | 0.714178428  | 8.277672851 | 5.330603447  | 0.000409257 | 0.000409257 | -0.067580747 |
| 1424890_at   | 0.93690105   | 5.891995371 | 5.330500414  | 0.000409314 | 0.000409314 | -0.067676472 |
| 1446324_at   | 0.901752106  | 7.089612718 | 5.285702292  | 0.000435136 | 0.000435136 | -0.109481961 |
| 1450009_at   | -0.381463256 | 5.735128849 | -5.260567955 | 0.000450387 | 0.000450387 | -0.13309927  |
| 1434982_at   | 0.578903438  | 6.170145029 | 5.259870676  | 0.000450818 | 0.000450818 | -0.133756128 |
| 1449310_at   | 0.655711073  | 4.73760907  | 5.25271936   | 0.000455266 | 0.000455266 | -0.140498074 |
| 1440668_at   | 0.46572949   | 7.291003473 | 5.251064442  | 0.000456302 | 0.000456302 | -0.142059607 |
| 1448859_at   | -0.413813394 | 5.63619017  | -5.249862093 | 0.000457057 | 0.000457057 | -0.143194426 |
| 1457044_at   | 0.563421275  | 5.71884339  | 5.246044116  | 0.000459461 | 0.000459461 | -0.146799743 |
| 1448612_at   | 0.52298053   | 8.039827479 | 5.191041206  | 0.000495648 | 0.000495648 | -0.199039142 |
| 1418025_at   | 0.460551167  | 7.689950887 | 5.170293704  | 0.000510084 | 0.000510084 | -0.2188904   |
| 1428834_at   | 0.399536967  | 5.675902678 | 5.165402857  | 0.000513553 | 0.000513553 | -0.223581665 |
| 1460668_at   | 0.821258799  | 8.854932876 | 5.164606727  | 0.00051412  | 0.00051412  | -0.22434573  |
| 1423227_at   | 0.959196253  | 9.139586918 | 5.142591771  | 0.000530068 | 0.000530068 | -0.245520901 |
| 1436718_at   | 0.540669098  | 6.325039756 | 5.100795834  | 0.000561827 | 0.000561827 | -0.285972039 |
| 1434177_at   | 0.349097185  | 8.157503493 | 5.09853533   | 0.000563602 | 0.000563602 | -0.288169146 |
| 1422625_at   | 0.38673012   | 8.489221766 | 5.084296773  | 0.000574921 | 0.000574921 | -0.302030436 |
| 1418203_at   | 0.661856375  | 5.562566691 | 5.054416054  | 0.000599477 | 0.000599477 | -0.331243365 |
| 1416686_at   | -0.384941043 | 9.076843251 | -5.053961124 | 0.000599859 | 0.000599859 | -0.331689427 |
| 1427095_at   | 0.457012478  | 7.983013328 | 5.017208176  | 0.000631639 | 0.000631639 | -0.367854859 |
| 1431233_at   | 0.553724079  | 7.384556411 | 4.986098343  | 0.000659952 | 0.000659952 | -0.398666741 |
| 1417563_at   | 0.319987319  | 5.660857216 | 4.965624169  | 0.000679326 | 0.000679326 | -0.419044756 |
| 1429344_at   | -0.492553202 | 6.141327526 | -4.949927058 | 0.000694593 | 0.000694593 | -0.434721942 |
| 1418449_at   | 0.374301277  | 7.842217092 | 4.910064395  | 0.000735039 | 0.000735039 | -0.474744182 |
| 1419722_at   | 0.353503517  | 7.394966513 | 4.89718616   | 0.00074864  | 0.00074864  | -0.487738506 |
| 1417549_at   | 0.325895315  | 7.639553281 | 4.874909529  | 0.000772806 | 0.000772806 | -0.510290458 |
| 1453152_at   | -0.763252648 | 7.187929139 | -4.871108305 | 0.000777013 | 0.000777013 | -0.514148099 |
| 1435761_at   | 1.019066067  | 6.010937885 | 4.854860923  | 0.000795271 | 0.000795271 | -0.530667655 |
| 1455780_at   | -0.337959605 | 6.359678478 | -4.851567489 | 0.000799028 | 0.000799028 | -0.534022393 |
| 1427640_a_at | 0.4224367    | 7.432154329 | 4.847721023  | 0.000803439 | 0.000803439 | -0.537943075 |
| 1437387_at   | 0.389751504  | 5.731168406 | 4.846798676  | 0.000804501 | 0.000804501 | -0.538883637 |
| 1426417_at   | 0.59178108   | 6.754831032 | 4.833283679  | 0.000820232 | 0.000820232 | -0.552684155 |
| 1450312_at   | -0.378822353 | 5.821423995 | -4.819243927 | 0.000836923 | 0.000836923 | -0.56705742  |
| 1424065_at   | -0.401248594 | 8.083618935 | -4.782792697 | 0.000881977 | 0.000881977 | -0.604550268 |
| 1439373_x_at | -0.492500642 | 4.343035638 | -4.779333007 | 0.000886387 | 0.000886387 | -0.608122013 |
| 1453904_at   | -0.577044638 | 4.130777924 | -4.777728514 | 0.000888439 | 0.000888439 | -0.60977925  |
| 1443997_at   | 0.495967918  | 7.338323244 | 4.774514585  | 0.000892567 | 0.000892567 | -0.613100309 |
| 1455784_at   | 0.542504252  | 4.965818493 | 4.763062495  | 0.000907441 | 0.000907441 | -0.62495019  |
| 1456878_at   | -0.370202182 | 7.153061008 | -4.748881074 | 0.000926228 | 0.000926228 | -0.639658966 |
| 1417845_at   | 0.499705237  | 7.793418711 | 4.748114393  | 0.000927256 | 0.000927256 | -0.640455254 |
| 1417851_at   | -0.795519466 | 5.367462662 | -4.736348491 | 0.000943178 | 0.000943178 | -0.652689616 |
| 1431601_at   | -0.332930601 | 4.155454062 | -4.728641525 | 0.000953765 | 0.000953765 | -0.660717794 |
| 1443639_at   | 0.907176678  | 4.958265184 | 4.70837853   | 0.000982213 | 0.000982213 | -0.681879555 |
| 1457587_at   | 0.379574022  | 5.667779137 | 4.708058549  | 0.000982669 | 0.000982669 | -0.68221436  |
| 1452398_at   | 0.380055551  | 8.517119513 | 4.696292602  | 0.000999611 | 0.000999611 | -0.694538981 |
| 1449311_at   | 0.524832133  | 6.982309114 | 4.68162727   | 0.001021165 | 0.001021165 | -0.709937771 |
| 1445547_at   | 0.402024027  | 5.467620625 | 4.677738599  | 0.001026964 | 0.001026964 | -0.714027835 |
| 1449880_s_at | -0.724138772 | 6.980390216 | -4.649621817 | 0.001069949 | 0.001069949 | -0.743686962 |
| 1435040_at   | 0.476297639  | 4.743886274 | 4.636162301  | 0.001091202 | 0.001091202 | -0.757938397 |
| 1417149_at   | -0.472924494 | 9.942494183 | -4.631043694 | 0.001099403 | 0.001099403 | -0.763367278 |
| 1460321_at   | -0.402975858 | 4.007923984 | -4.608073521 | 0.001137022 | 0.001137022 | -0.787791622 |

|              |              |             |              |             |             |              |
|--------------|--------------|-------------|--------------|-------------|-------------|--------------|
| 1444030_at   | 0.588179294  | 4.97201682  | 4.597647132  | 0.001154549 | 0.001154549 | -0.798911425 |
| 1422640_at   | 0.617567539  | 6.547622475 | 4.59150501   | 0.001165008 | 0.001165008 | -0.805471777 |
| 1457446_at   | 0.415907317  | 6.123758845 | 4.576751464  | 0.001190548 | 0.001190548 | -0.821259447 |
| 1418599_at   | -0.374591072 | 11.16051393 | -4.573542863 | 0.001196181 | 0.001196181 | -0.824698467 |
| 1425228_a_at | -0.313453531 | 8.362924598 | -4.567251643 | 0.001207309 | 0.001207309 | -0.831447201 |
| 1440583_at   | -0.317091004 | 4.40873499  | -4.558686345 | 0.001222636 | 0.001222636 | -0.840647571 |
| 1425410_at   | 0.407655539  | 5.072364213 | 4.522192422  | 0.001290306 | 0.001290306 | -0.880004688 |
| 1418745_at   | -0.450887788 | 8.901189711 | -4.508695665 | 0.001316335 | 0.001316335 | -0.894624896 |
| 1427017_at   | -0.317343606 | 10.28622942 | -4.504933443 | 0.00132369  | 0.00132369  | -0.898706488 |
| 1460259_s_at | 0.417881563  | 4.641535143 | 4.501635521  | 0.001330173 | 0.001330173 | -0.902286592 |
| 1420545_a_at | -0.363708026 | 7.533293502 | -4.494627555 | 0.001344062 | 0.001344062 | -0.909901086 |
| 1434925_at   | 0.355722119  | 4.105199104 | 4.494326324  | 0.001344662 | 0.001344662 | -0.910228599 |
| 1416121_at   | -0.400180458 | 11.99424403 | -4.484543719 | 0.001364319 | 0.001364319 | -0.920874131 |
| 1422866_at   | -0.419573755 | 7.786888456 | -4.478328642 | 0.001376966 | 0.001376966 | -0.92764694  |
| 1418301_at   | 0.366707538  | 8.717461228 | 4.477407414  | 0.001378851 | 0.001378851 | -0.928651465 |
| 1418572_x_at | 0.404910364  | 7.963802887 | 4.475391097  | 0.001382986 | 0.001382986 | -0.930850664 |
| 1442075_at   | -0.501570981 | 4.464157168 | -4.469775168 | 0.001394575 | 0.001394575 | -0.936980053 |
| 1454159_a_at | 0.492817751  | 10.63091736 | 4.466386892  | 0.001401617 | 0.001401617 | -0.94068103  |
| 1460578_at   | 0.306373262  | 7.866436804 | 4.465563841  | 0.001403333 | 0.001403333 | -0.941580371 |
| 1424021_at   | -0.369238269 | 6.946799596 | -4.459212802 | 0.001416652 | 0.001416652 | -0.948524441 |
| 1422916_at   | 0.541574015  | 5.962906531 | 4.428039881  | 0.001484006 | 0.001484006 | -0.982719729 |
| 1418569_at   | 0.406820363  | 7.182838517 | 4.42065132   | 0.001500465 | 0.001500465 | -0.990851804 |
| 1438698_at   | 0.454844696  | 6.998462566 | 4.410930316  | 0.001522415 | 0.001522415 | -1.001566876 |
| 1430392_at   | 0.636907342  | 7.735842584 | 4.403377917  | 0.001539705 | 0.001539705 | -1.009904002 |
| 1446537_at   | 0.385903927  | 7.294098527 | 4.400900374  | 0.001545422 | 0.001545422 | -1.012641336 |
| 1426734_at   | 0.337547626  | 8.327283876 | 4.357033979  | 0.001650476 | 0.001650476 | -1.061300725 |
| 1443206_at   | -0.289168885 | 4.096208982 | -4.342123684 | 0.001687892 | 0.001687892 | -1.077923354 |
| 1430970_a_at | -0.368247893 | 4.643629042 | -4.327001529 | 0.001726762 | 0.001726762 | -1.0948252   |
| 1453862_at   | -0.360851951 | 4.536126177 | -4.325998857 | 0.001729372 | 0.001729372 | -1.095947405 |
| 1455748_at   | 0.567463111  | 5.826273476 | 4.325341207  | 0.001731087 | 0.001731087 | -1.096683559 |
| 1449586_at   | 0.547097866  | 9.576067481 | 4.32085652   | 0.001742827 | 0.001742827 | -1.101705771 |
| 1444973_at   | -0.340931196 | 7.631617771 | -4.320428477 | 0.001743952 | 0.001743952 | -1.102185317 |
| 1430968_at   | -0.317552098 | 3.481711726 | -4.318963919 | 0.001747807 | 0.001747807 | -1.103826356 |
| 1460084_at   | 0.491072092  | 4.946771454 | 4.310026069  | 0.00177153  | 0.00177153  | -1.113850021 |
| 1437930_at   | -0.344623402 | 6.613203266 | -4.307968286 | 0.001777041 | 0.001777041 | -1.116159932 |
| 1430830_at   | 0.321664371  | 6.338438828 | 4.300014145  | 0.001798511 | 0.001798511 | -1.125096169 |
| 1446220_at   | 0.389232571  | 7.043516184 | 4.296748396  | 0.001807406 | 0.001807406 | -1.1287686   |
| 1449502_at   | -0.414010945 | 4.41011136  | -4.291156429 | 0.001822745 | 0.001822745 | -1.135061604 |
| 1453370_at   | 0.342212928  | 6.164926356 | 4.285013687  | 0.001839755 | 0.001839755 | -1.141981232 |
| 1460250_at   | 0.742111794  | 10.08236745 | 4.284503568  | 0.001841175 | 0.001841175 | -1.142556186 |
| 1457483_at   | 0.505368267  | 7.629323453 | 4.279740508  | 0.001854491 | 0.001854491 | -1.147926996 |
| 1440086_at   | 0.337507154  | 7.29397416  | 4.277168343  | 0.001861725 | 0.001861725 | -1.150829138 |
| 1430791_at   | 0.876607448  | 5.177769679 | 4.273259587  | 0.001872774 | 0.001872774 | -1.155241724 |
| 1455147_at   | -0.455449535 | 5.504505144 | -4.271587085 | 0.001877523 | 0.001877523 | -1.157130688 |
| 1423009_at   | 0.424270657  | 4.239768897 | 4.259691897  | 0.001911672 | 0.001911672 | -1.170580582 |
| 1444451_at   | 0.54872414   | 8.627577281 | 4.256874895  | 0.001919855 | 0.001919855 | -1.173769666 |
| 1418979_at   | -0.549452638 | 4.961322775 | -4.251706935 | 0.001934964 | 0.001934964 | -1.179624111 |
| 1423566_a_at | -0.318909569 | 8.680648931 | -4.236743594 | 0.001979427 | 0.001979427 | -1.196603396 |
| 1452094_at   | -0.332184546 | 9.703420151 | -4.236543683 | 0.001980028 | 0.001980028 | -1.196830524 |
| 1419311_at   | 0.355425584  | 6.267694265 | 4.23617644   | 0.001981133 | 0.001981133 | -1.197247787 |
| 1415836_at   | -0.330467614 | 7.809999356 | -4.215018702 | 0.00204592  | 0.00204592  | -1.221329922 |
| 1417235_at   | 0.275822992  | 6.840039234 | 4.210839915  | 0.00205898  | 0.00205898  | -1.226096207 |
| 1425157_x_at | -0.268550847 | 5.387597491 | -4.205858264 | 0.002074664 | 0.002074664 | -1.2317825   |



|              |              |             |              |             |             |              |
|--------------|--------------|-------------|--------------|-------------|-------------|--------------|
| 1421727_at   | 0.334280832  | 7.123057193 | 4.205633406  | 0.002075375 | 0.002075375 | -1.232039273 |
| 1428344_at   | 0.342392706  | 6.30252429  | 4.200467474  | 0.002091779 | 0.002091779 | -1.237941027 |
| 1452968_at   | -0.451885379 | 10.53207066 | -4.197008389 | 0.00210284  | 0.00210284  | -1.241895601 |
| 1435331_at   | 0.349624629  | 3.473910272 | 4.1929567    | 0.002115874 | 0.002115874 | -1.246530507 |
| 1423153_x_at | -0.581936725 | 4.748447631 | -4.191542361 | 0.002120445 | 0.002120445 | -1.248149153 |
| 1445886_at   | 0.351399565  | 5.055997768 | 4.190621859  | 0.002123425 | 0.002123425 | -1.249202826 |
| 1427308_at   | 0.350715161  | 4.318585658 | 4.190194499  | 0.00212481  | 0.00212481  | -1.249692066 |
| 1459658_at   | -0.275798987 | 5.353891496 | -4.186478408 | 0.002136894 | 0.002136894 | -1.253947674 |
| 1447231_at   | 0.805412497  | 5.720572209 | 4.180986665  | 0.002154886 | 0.002154886 | -1.260241443 |
| 1416022_at   | 0.344040567  | 10.98255282 | 4.179931429  | 0.002158361 | 0.002158361 | -1.261451432 |
| 1448507_at   | 0.558292309  | 5.548426299 | 4.178922452  | 0.00216169  | 0.00216169  | -1.262608572 |
| 1456527_at   | 0.353922221  | 5.553948853 | 4.175616461  | 0.002172635 | 0.002172635 | -1.266401357 |
| 1454691_at   | -0.413530151 | 7.922067382 | -4.174295168 | 0.002177025 | 0.002177025 | -1.267917775 |
| 1434055_at   | -0.398989575 | 5.2730428   | -4.160683171 | 0.002222809 | 0.002222809 | -1.283558853 |
| 1456970_at   | -0.313152104 | 4.683759283 | -4.159905589 | 0.002225455 | 0.002225455 | -1.284453386 |
| 1450867_at   | -0.285078426 | 5.32304763  | -4.159819211 | 0.002225749 | 0.002225749 | -1.284552763 |
| 1428663_at   | -0.685120699 | 9.980663793 | -4.158195665 | 0.002231286 | 0.002231286 | -1.286420883 |
| 1441599_at   | 0.289366506  | 3.756659814 | 4.156624731  | 0.002236656 | 0.002236656 | -1.288228932 |
| 1442791_x_at | 0.265685483  | 3.677005145 | 4.156108584  | 0.002238424 | 0.002238424 | -1.288823085 |
| 1438937_x_at | 0.370792542  | 5.014832696 | 4.149381393  | 0.002261598 | 0.002261598 | -1.296571495 |
| 1441368_at   | 0.315907277  | 6.835633881 | 4.138770463  | 0.002298668 | 0.002298668 | -1.30881027  |
| 1454886_x_at | -0.399711239 | 4.584160376 | -4.137175217 | 0.002304296 | 0.002304296 | -1.310652049 |
| 1450311_at   | -0.421466334 | 6.538772215 | -4.133571675 | 0.002317064 | 0.002317064 | -1.314814227 |
| 1443552_at   | -0.347230818 | 4.682353271 | -4.119153235 | 0.002368906 | 0.002368906 | -1.331491893 |
| 1426875_s_at | 0.327511836  | 6.907629649 | 4.117344132  | 0.002375497 | 0.002375497 | -1.333587176 |
| 1419043_a_at | 0.458473994  | 5.808286953 | 4.116063172  | 0.002380175 | 0.002380175 | -1.335071135 |
| 1424556_at   | -0.555047848 | 8.917796648 | -4.108026518 | 0.002409751 | 0.002409751 | -1.344388296 |
| 1436528_at   | -0.512187969 | 8.35531618  | -4.102161112 | 0.002431582 | 0.002431582 | -1.35119577  |
| 1431146_a_at | -0.270856596 | 7.423555993 | -4.097225154 | 0.002450115 | 0.002450115 | -1.356929421 |
| 1426204_a_at | 0.311942123  | 3.731030998 | 4.094355516  | 0.002460959 | 0.002460959 | -1.360264878 |
| 1437469_at   | 0.356849333  | 6.602686873 | 4.081572505  | 0.002509882 | 0.002509882 | -1.375141292 |
| 1422790_at   | 0.371904424  | 5.681309092 | 4.080753769  | 0.00251305  | 0.00251305  | -1.376095131 |
| 1457871_at   | -0.387972127 | 4.020373823 | -4.080025889 | 0.002515871 | 0.002515871 | -1.376943223 |
| 1426263_at   | 0.443306875  | 8.036343948 | 4.079702562  | 0.002517125 | 0.002517125 | -1.37731998  |
| 1423669_at   | -0.414168903 | 13.50154298 | -4.068359525 | 0.002561533 | 0.002561533 | -1.390549593 |
| 1459729_at   | -0.555934245 | 7.280047319 | -4.061775752 | 0.002587689 | 0.002587689 | -1.398239183 |
| 1455692_x_at | -0.590248663 | 6.384685818 | -4.061726823 | 0.002587884 | 0.002587884 | -1.398296361 |
| 1434742_s_at | -0.357524533 | 5.287273776 | -4.053853247 | 0.002619537 | 0.002619537 | -1.407502862 |
| 1424872_at   | 0.293000533  | 8.753896625 | 4.049365589  | 0.002637761 | 0.002637761 | -1.412755304 |
| 1459847_x_at | -0.300876818 | 7.964807057 | -4.046847498 | 0.002648045 | 0.002648045 | -1.415704136 |
| 1450786_x_at | 0.346266697  | 6.480113718 | 4.042927706  | 0.002664139 | 0.002664139 | -1.42029674  |
| 1437213_at   | 0.367109446  | 6.374454645 | 4.039231988  | 0.002679407 | 0.002679407 | -1.424629372 |
| 1416803_at   | -0.311182303 | 10.36675233 | -4.03564615  | 0.00269431  | 0.00269431  | -1.428835564 |
| 1426251_at   | -0.471324737 | 5.041837617 | -4.034595195 | 0.002698694 | 0.002698694 | -1.430068778 |
| 1451484_a_at | 0.367739331  | 5.978466326 | 4.034488407  | 0.00269914  | 0.00269914  | -1.430194097 |
| 1449340_at   | 0.792875737  | 10.0303489  | 4.033004266  | 0.002705345 | 0.002705345 | -1.431935993 |
| 1442753_at   | 0.366528229  | 4.364539617 | 4.031373875  | 0.002712179 | 0.002712179 | -1.433849999 |
| 1430216_at   | 0.594658938  | 4.905305226 | 4.028113215  | 0.002725902 | 0.002725902 | -1.437679318 |
| 1424528_at   | -0.673928194 | 7.534302601 | -4.024119441 | 0.00274281  | 0.00274281  | -1.442372237 |
| 1453084_s_at | -0.6347391   | 8.495163571 | -4.023271297 | 0.002746415 | 0.002746415 | -1.443369229 |
| 1444029_at   | -0.27861122  | 4.973918472 | -4.02066912  | 0.002757507 | 0.002757507 | -1.446428897 |
| 1422404_x_at | -0.382085554 | 4.936267027 | -4.020347711 | 0.00275888  | 0.00275888  | -1.446806899 |
| 1435697_a_at | 0.447435463  | 5.693505522 | 4.019000722  | 0.002764643 | 0.002764643 | -1.448391265 |

|              |              |             |              |             |             |              |
|--------------|--------------|-------------|--------------|-------------|-------------|--------------|
| 1419233_x_at | -0.278692937 | 5.543007844 | -4.018238141 | 0.002767911 | 0.002767911 | -1.449288379 |
| 1440657_at   | -0.413562887 | 6.317535663 | -4.017594394 | 0.002770674 | 0.002770674 | -1.450045777 |
| 1449556_at   | 0.553593856  | 6.530094372 | 4.016185093  | 0.002776731 | 0.002776731 | -1.451704146 |
| 1437868_at   | -0.451734364 | 9.520056804 | -4.013117539 | 0.002789964 | 0.002789964 | -1.45531508  |
| 1441593_at   | 0.393661042  | 6.76836548  | 4.008928982  | 0.00280814  | 0.00280814  | -1.460248338 |
| 1422955_at   | 0.353407818  | 4.724665928 | 4.008671146  | 0.002809263 | 0.002809263 | -1.460552119 |
| 1455215_at   | -0.741596211 | 6.808194248 | -4.00812096  | 0.00281166  | 0.00281166  | -1.461200386 |
| 1450134_at   | -0.57815328  | 5.787824296 | -4.001788642 | 0.002839414 | 0.002839414 | -1.468665503 |
| 1441975_at   | 0.458240247  | 5.845529399 | 3.989467328  | 0.002894248 | 0.002894248 | -1.483211743 |
| 1418283_at   | 0.505090525  | 7.925192266 | 3.988830844  | 0.002897111 | 0.002897111 | -1.483963904 |
| 1437901_a_at | 0.395547177  | 9.31607541  | 3.972621026  | 0.002971035 | 0.002971035 | -1.503144312 |
| 1455251_at   | 0.31932384   | 6.753118277 | 3.971930839  | 0.002974227 | 0.002974227 | -1.50396203  |
| 1418546_a_at | -0.290807361 | 6.336203978 | -3.966029493 | 0.003001663 | 0.003001663 | -1.510957296 |
| 1439609_at   | 0.380593736  | 6.235530432 | 3.963361609  | 0.003014153 | 0.003014153 | -1.514121769 |
| 1417933_at   | -0.316037121 | 5.346290535 | -3.959267053 | 0.00303343  | 0.00303343  | -1.518980946 |
| 1440973_at   | 0.356880492  | 6.587291502 | 3.956374843  | 0.003047125 | 0.003047125 | -1.522415059 |
| 1450940_at   | 0.488005214  | 3.887862945 | 3.947375057  | 0.003090158 | 0.003090158 | -1.533110661 |
| 1430850_x_at | -0.319139561 | 4.764889807 | -3.947169354 | 0.003091149 | 0.003091149 | -1.533355293 |
| 1450875_at   | -0.411758915 | 5.238702264 | -3.944510043 | 0.003103992 | 0.003103992 | -1.536518559 |
| 1434227_at   | 0.539042686  | 6.449393415 | 3.944409093  | 0.00310448  | 0.00310448  | -1.536638664 |
| 1423250_a_at | 0.262493795  | 9.404250025 | 3.938905833  | 0.00313124  | 0.00313124  | -1.543188924 |
| 1444302_at   | -0.386519414 | 8.485817785 | -3.932608351 | 0.003162161 | 0.003162161 | -1.550691122 |
| 1423135_at   | 0.461056704  | 6.162511338 | 3.924862327  | 0.003200635 | 0.003200635 | -1.559928636 |
| 1419420_at   | 0.611012714  | 5.320971932 | 3.923778283  | 0.003206059 | 0.003206059 | -1.561222261 |
| 1460229_at   | 0.767189736  | 6.051122599 | 3.923277973  | 0.003208565 | 0.003208565 | -1.561819367 |
| 1433272_at   | -0.280103003 | 5.512419259 | -3.91211312  | 0.003265039 | 0.003265039 | -1.575155854 |
| 1438202_at   | 0.265963088  | 7.582174153 | 3.9096493    | 0.003277642 | 0.003277642 | -1.578101874 |
| 1428896_at   | -0.509700749 | 8.526529364 | -3.89914307  | 0.003331961 | 0.003331961 | -1.590676329 |
| 1442514_a_at | 0.373467048  | 5.306236498 | 3.894659913  | 0.003355428 | 0.003355428 | -1.59604795  |
| 1439500_at   | 0.371820643  | 7.665911521 | 3.88959085   | 0.003382171 | 0.003382171 | -1.602125851 |
| 1448894_at   | 0.31739596   | 7.974442145 | 3.883033941  | 0.003417097 | 0.003417097 | -1.609994404 |
| 1443921_at   | -0.423901285 | 6.096845204 | -3.882877089 | 0.003417937 | 0.003417937 | -1.610182726 |
| 1446769_at   | 0.257465987  | 5.245494338 | 3.879037549  | 0.003438571 | 0.003438571 | -1.614793934 |
| 1449234_at   | -0.314471807 | 5.980513494 | -3.873769906 | 0.003467092 | 0.003467092 | -1.621124468 |
| 1458793_at   | -0.282415471 | 6.711677116 | -3.870100438 | 0.003487107 | 0.003487107 | -1.625537222 |
| 1444674_at   | -0.25728027  | 3.95842623  | -3.868945638 | 0.003493431 | 0.003493431 | -1.626926424 |
| 1436002_at   | 0.583590668  | 8.496228514 | 3.862526811  | 0.003528803 | 0.003528803 | -1.634652394 |
| 1431007_at   | 0.371353151  | 7.98954245  | 3.85947282   | 0.003545765 | 0.003545765 | -1.638330831 |
| 1440216_at   | -0.499407331 | 10.46189638 | -3.850684961 | 0.003595053 | 0.003595053 | -1.64892459  |
| 1447505_at   | -0.27791531  | 4.2264998   | -3.846807751 | 0.003617027 | 0.003617027 | -1.653602832 |
| 1456258_at   | 0.567576928  | 4.341564629 | 3.844652865  | 0.003629301 | 0.003629301 | -1.656204047 |
| 1424755_at   | -0.773703566 | 7.508293627 | -3.844521828 | 0.003630049 | 0.003630049 | -1.656362252 |
| 1440874_at   | 0.467202293  | 6.055501441 | 3.843412135  | 0.003636388 | 0.003636388 | -1.657702128 |
| 1420871_at   | 0.302451272  | 7.085023091 | 3.838806169  | 0.003662825 | 0.003662825 | -1.663265791 |
| 1434783_at   | -0.291847846 | 6.605995518 | -3.836297423 | 0.003677309 | 0.003677309 | -1.666297715 |
| 1447258_at   | 0.604672555  | 6.509545345 | 3.835922714  | 0.003679478 | 0.003679478 | -1.666750659 |
| 1419406_a_at | 0.285870984  | 8.236022116 | 3.83373162   | 0.003692185 | 0.003692185 | -1.66939972  |
| 1443671_x_at | -0.313750527 | 4.680277287 | -3.820736808 | 0.003768504 | 0.003768504 | -1.685127653 |
| 1455966_s_at | 0.392059981  | 7.606867187 | 3.818780587  | 0.003780136 | 0.003780136 | -1.687497835 |
| 1428485_at   | 0.353505789  | 6.948726709 | 3.817579044  | 0.003787299 | 0.003787299 | -1.688953966 |
| 1457344_at   | -0.344273721 | 6.318499068 | -3.814507829 | 0.003805674 | 0.003805674 | -1.692677051 |
| 1430422_at   | -0.277873696 | 4.503865761 | -3.813163195 | 0.003813748 | 0.003813748 | -1.694307596 |
| 1435239_at   | -0.57926333  | 6.979072668 | -3.806710186 | 0.003852748 | 0.003852748 | -1.702137036 |



|              |              |             |              |             |             |              |
|--------------|--------------|-------------|--------------|-------------|-------------|--------------|
| 1449360_at   | 0.377033379  | 4.515071886 | 3.806469233  | 0.003854212 | 0.003854212 | -1.702429523 |
| 1424667_a_at | -0.355563277 | 6.966695059 | -3.801138249 | 0.00388676  | 0.00388676  | -1.708903212 |
| 1434974_at   | -0.340805908 | 4.974081159 | -3.797799585 | 0.003907291 | 0.003907291 | -1.712960001 |
| 1453051_at   | 0.343122266  | 5.337376859 | 3.792281789  | 0.003941472 | 0.003941472 | -1.719668813 |
| 1421508_at   | -0.44415092  | 5.127784869 | -3.788439114 | 0.003965462 | 0.003965462 | -1.724343997 |
| 1424529_s_at | -0.604057631 | 8.173501462 | -3.773531823 | 0.00405999  | 0.00405999  | -1.742504709 |
| 1451857_a_at | -0.244681429 | 6.171776763 | -3.770619713 | 0.004078731 | 0.004078731 | -1.746056771 |
| 1435679_at   | -0.418698954 | 5.043969794 | -3.770326327 | 0.004080624 | 0.004080624 | -1.74641471  |
| 1418106_at   | 0.373313412  | 3.862030701 | 3.768910946  | 0.00408977  | 0.00408977  | -1.748141718 |
| 1416464_at   | 0.31359533   | 6.827722109 | 3.768149416  | 0.0040947   | 0.0040947   | -1.749071055 |
| 1424162_at   | 0.383766336  | 8.45008784  | 3.76470999   | 0.004117042 | 0.004117042 | -1.753269601 |
| 1422444_at   | 0.312258163  | 8.831277356 | 3.763369746  | 0.004125783 | 0.004125783 | -1.754906192 |
| 1441375_at   | -0.374800995 | 6.267022761 | -3.754615694 | 0.004183357 | 0.004183357 | -1.765603349 |
| 1427970_at   | -0.250103091 | 6.073499632 | -3.753099823 | 0.004193412 | 0.004193412 | -1.767457004 |
| 1453308_at   | 0.341252015  | 7.291028995 | 3.753060325  | 0.004193675 | 0.004193675 | -1.767505308 |
| 1421551_s_at | 0.669917683  | 6.322012922 | 3.751850934  | 0.004201716 | 0.004201716 | -1.768984475 |
| 1417680_at   | 0.712824761  | 6.353487157 | 3.749597203  | 0.004216743 | 0.004216743 | -1.771741596 |
| 1427919_at   | -0.461261858 | 6.196106492 | -3.747750897 | 0.004229096 | 0.004229096 | -1.774000926 |
| 1450355_a_at | 0.363170307  | 8.027891482 | 3.74482804   | 0.004248729 | 0.004248729 | -1.777578805 |
| 1451832_at   | 0.339163399  | 7.577464266 | 3.740819641  | 0.00427581  | 0.00427581  | -1.782487828 |
| 1457583_at   | 0.409828848  | 7.36145773  | 3.727522428  | 0.00436695  | 0.00436695  | -1.798791965 |
| 1417416_at   | 0.417368442  | 6.438004153 | 3.726241613  | 0.004375836 | 0.004375836 | -1.800363971 |
| 1431689_at   | -0.293755405 | 4.302267781 | -3.72602235  | 0.004377359 | 0.004377359 | -1.80063311  |
| 1434206_s_at | 0.292980242  | 8.482272057 | 3.725980078  | 0.004377653 | 0.004377653 | -1.800684998 |
| 1427320_at   | 0.2702267    | 7.001635882 | 3.71942629   | 0.004423438 | 0.004423438 | -1.808733335 |
| 1428240_at   | -0.302961312 | 7.432696745 | -3.711359082 | 0.004480486 | 0.004480486 | -1.818650012 |
| 1450725_s_at | 0.286514973  | 5.937329871 | 3.703414916  | 0.004537419 | 0.004537419 | -1.828425969 |
| 1444359_at   | 0.242052684  | 4.372362725 | 3.70228801   | 0.004545556 | 0.004545556 | -1.829813565 |
| 1424491_at   | -0.3142572   | 5.056501717 | -3.700204099 | 0.004560644 | 0.004560644 | -1.832380104 |
| 1419044_at   | 0.790800852  | 5.563696188 | 3.698971605  | 0.004569593 | 0.004569593 | -1.833898376 |
| 1422833_at   | -0.367227004 | 5.158610604 | -3.690795623 | 0.00462942  | 0.00462942  | -1.843976457 |
| 1434590_at   | -0.280765389 | 4.615420686 | -3.689811246 | 0.004636679 | 0.004636679 | -1.845190585 |
| 1443157_at   | 0.546739733  | 5.640423687 | 3.688497215  | 0.004646386 | 0.004646386 | -1.846811555 |
| 1425906_a_at | -0.37604148  | 5.806509773 | -3.685252483 | 0.004670449 | 0.004670449 | -1.850815424 |
| 1455886_at   | 0.392844119  | 8.888009457 | 3.683873763  | 0.004680713 | 0.004680713 | -1.852517231 |
| 1426048_s_at | 0.348201458  | 6.612949784 | 3.681679318  | 0.004697098 | 0.004697098 | -1.855226561 |
| 1415899_at   | 0.263800069  | 5.698218016 | 3.681369316  | 0.004699418 | 0.004699418 | -1.855609363 |
| 1448392_at   | -0.373209767 | 12.3742102  | -3.679783235 | 0.004711304 | 0.004711304 | -1.857568158 |
| 1432649_at   | -0.277706806 | 3.997339059 | -3.679779174 | 0.004711334 | 0.004711334 | -1.857573174 |
| 1426911_at   | 0.478359834  | 8.603520272 | 3.679062935  | 0.004716712 | 0.004716712 | -1.858457858 |
| 1460605_at   | 1.551959314  | 4.248564925 | 3.678396284  | 0.004721724 | 0.004721724 | -1.859281367 |
| 1431963_at   | -0.302903344 | 4.138967672 | -3.678240872 | 0.004722893 | 0.004722893 | -1.859473356 |
| 1452391_at   | 0.292850923  | 5.679736129 | 3.677929173  | 0.004725239 | 0.004725239 | -1.85985843  |
| 1444089_at   | -0.237501587 | 9.350646975 | -3.677559364 | 0.004728023 | 0.004728023 | -1.860315311 |
| 1420589_at   | 0.42169779   | 6.551675163 | 3.668984862  | 0.004793071 | 0.004793071 | -1.870914963 |
| 1459259_at   | -0.415751875 | 4.765401297 | -3.668118462 | 0.004799695 | 0.004799695 | -1.871986658 |
| 1458285_at   | -0.304812009 | 4.31452534  | -3.668113878 | 0.00479973  | 0.00479973  | -1.871992328 |
| 1457658_x_at | 0.514069038  | 5.79926732  | 3.662852047  | 0.00484017  | 0.00484017  | -1.878503582 |
| 1445885_at   | 0.290138119  | 6.57032469  | 3.660844727  | 0.004855691 | 0.004855691 | -1.880988725 |
| 1449682_s_at | 0.551581482  | 8.634430703 | 3.660529215  | 0.004858135 | 0.004858135 | -1.881379402 |
| 1419717_at   | -0.37836215  | 7.439787606 | -3.660482038 | 0.0048585   | 0.0048585   | -1.881437819 |
| 1435486_at   | -0.320968622 | 8.313166108 | -3.659969589 | 0.004862474 | 0.004862474 | -1.882072386 |
| 1444087_at   | 0.302107256  | 5.264099268 | 3.65756635   | 0.004881152 | 0.004881152 | -1.885048891 |

|              |              |             |              |             |             |              |
|--------------|--------------|-------------|--------------|-------------|-------------|--------------|
| 1434341_x_at | -0.245409578 | 7.170763339 | -3.650020488 | 0.004940288 | 0.004940288 | -1.89440081  |
| 1456512_at   | -0.459165744 | 6.71337876  | -3.64967082  | 0.004943047 | 0.004943047 | -1.894834392 |
| 1438060_at   | -0.327490455 | 7.087742105 | -3.648701975 | 0.004950698 | 0.004950698 | -1.896035844 |
| 1416021_a_at | 0.237773956  | 12.40341802 | 3.647940058  | 0.004956724 | 0.004956724 | -1.896980795 |
| 1452464_a_at | 0.298933825  | 7.607821561 | 3.646226503  | 0.004970304 | 0.004970304 | -1.899106334 |
| 1434340_at   | -1.097184987 | 6.362526244 | -3.644955645 | 0.004980401 | 0.004980401 | -1.900683045 |
| 1457588_at   | -1.997301419 | 7.168347057 | -3.64128264  | 0.005009704 | 0.005009704 | -1.905241481 |
| 1451823_at   | -0.239318689 | 3.530539867 | -3.637780888 | 0.005037809 | 0.005037809 | -1.9095894   |
| 1425658_at   | -0.285830136 | 7.460415957 | -3.637175037 | 0.005042688 | 0.005042688 | -1.910341848 |
| 1444449_at   | -0.280688719 | 4.756591427 | -3.637056293 | 0.005043645 | 0.005043645 | -1.910489332 |
| 1435110_at   | -0.355315601 | 8.008299669 | -3.635466416 | 0.005056476 | 0.005056476 | -1.912464222 |
| 1421657_a_at | 0.284790372  | 5.913976454 | 3.634572948  | 0.005063701 | 0.005063701 | -1.913574235 |
| 1460214_at   | -0.387529685 | 8.395253333 | -3.629032434 | 0.005108747 | 0.005108747 | -1.920460426 |
| 1435339_at   | 0.247719836  | 9.364687219 | 3.628334199  | 0.005114454 | 0.005114454 | -1.921328596 |
| 1423753_at   | -0.364373751 | 9.084418765 | -3.627794665 | 0.005118868 | 0.005118868 | -1.921999494 |
| 1433198_at   | -0.295784665 | 3.975131195 | -3.626173379 | 0.005132156 | 0.005132156 | -1.924015806 |
| 1428123_at   | 0.254739911  | 4.534303145 | 3.624790678  | 0.005143517 | 0.005143517 | -1.925735732 |
| 1456121_at   | -0.233687124 | 6.620124712 | -3.62469125  | 0.005144335 | 0.005144335 | -1.925859421 |
| 1448568_a_at | 0.300331732  | 9.500143007 | 3.623748577  | 0.005152097 | 0.005152097 | -1.927032191 |
| 1457972_at   | -0.247983575 | 4.510689415 | -3.620214831 | 0.005181304 | 0.005181304 | -1.93142975  |
| 1456359_at   | 0.320407276  | 7.220501954 | 3.619478745  | 0.005187409 | 0.005187409 | -1.932346021 |
| 1419905_s_at | 0.258948703  | 8.675879974 | 3.616585439  | 0.005211481 | 0.005211481 | -1.935948403 |
| 1457908_at   | 0.281184401  | 6.662899103 | 3.614002183  | 0.005233072 | 0.005233072 | -1.939165874 |
| 1421279_at   | 0.345059226  | 7.777241864 | 3.61386289   | 0.005234239 | 0.005234239 | -1.939339395 |
| 1453620_at   | -0.276112521 | 5.150637748 | -3.606241087 | 0.005298504 | 0.005298504 | -1.948838757 |
| 1453254_at   | -0.241941122 | 4.463920516 | -3.604906599 | 0.00530984  | 0.00530984  | -1.950502929 |
| 1450330_at   | 0.279748806  | 3.658444299 | 3.602310653  | 0.005331966 | 0.005331966 | -1.953741005 |
| 1452904_at   | -0.365155305 | 5.990407836 | -3.596419843 | 0.005382532 | 0.005382532 | -1.9610929   |
| 1459393_at   | 0.527199233  | 7.193249092 | 3.595497621  | 0.005390494 | 0.005390494 | -1.962244353 |
| 1421282_at   | -0.381454977 | 5.321469895 | -3.594790864 | 0.005396604 | 0.005396604 | -1.963126875 |
| 1425811_a_at | 0.325953092  | 9.239002347 | 3.592365722  | 0.005417624 | 0.005417624 | -1.966155727 |
| 1415900_a_at | -0.245852419 | 6.0677295   | -3.588494845 | 0.005451352 | 0.005451352 | -1.970992124 |
| 1425993_a_at | -0.22471637  | 9.751473961 | -3.585326525 | 0.005479122 | 0.005479122 | -1.974952469 |
| 1437919_at   | 0.254757497  | 6.438781875 | 3.584849227  | 0.005483318 | 0.005483318 | -1.97554922  |
| 1454387_at   | -0.26817112  | 4.74462307  | -3.583479135 | 0.005495382 | 0.005495382 | -1.9772624   |
| 1436243_at   | 0.282021643  | 5.489458751 | 3.583093199  | 0.005498786 | 0.005498786 | -1.977745032 |
| 1456318_at   | 0.334864539  | 5.033979676 | 3.580159596  | 0.005524727 | 0.005524727 | -1.981414408 |
| 1418367_x_at | -0.304538117 | 7.121428861 | -3.576794298 | 0.005554643 | 0.005554643 | -1.985625404 |
| 1419564_at   | 0.277920344  | 7.910054282 | 3.574723292  | 0.005573138 | 0.005573138 | -1.98821773  |
| 1442936_at   | 0.533280048  | 7.676832937 | 3.569771182  | 0.005617623 | 0.005617623 | -1.994419101 |
| 1457778_at   | -0.330315121 | 5.775373309 | -3.569307609 | 0.005621806 | 0.005621806 | -1.994999813 |
| 1435877_at   | 0.239059255  | 5.955645473 | 3.569217404  | 0.005622621 | 0.005622621 | -1.995112816 |
| 1425619_s_at | 0.297053907  | 7.248674651 | 3.567178509  | 0.005641061 | 0.005641061 | -1.997667341 |
| 1422869_at   | -0.234671297 | 8.295492022 | -3.560930694 | 0.005697962 | 0.005697962 | -2.005499214 |
| 1445749_at   | 0.235756626  | 3.396127926 | 3.560386217  | 0.005702949 | 0.005702949 | -2.006182023 |
| 1433642_at   | 0.504462666  | 7.256700423 | 3.559520798  | 0.005710885 | 0.005710885 | -2.007267406 |
| 1437047_at   | 0.430676592  | 5.958041086 | 3.558915562  | 0.005716442 | 0.005716442 | -2.008026546 |
| 1453246_at   | 0.512650632  | 5.624150712 | 3.558841404  | 0.005717123 | 0.005717123 | -2.008119565 |
| 1438822_at   | -0.522662919 | 5.376461242 | -3.554700855 | 0.005755296 | 0.005755296 | -2.013314553 |
| 1417924_at   | -0.435711248 | 6.068482391 | -3.554374769 | 0.005758313 | 0.005758313 | -2.013723793 |
| 1420872_at   | 0.332126553  | 7.179856349 | 3.554164091  | 0.005760264 | 0.005760264 | -2.013988204 |
| 1447067_at   | -0.215780337 | 3.911909568 | -3.547334821 | 0.005823864 | 0.005823864 | -2.02256295  |
| 1438082_at   | 0.416218659  | 6.409357828 | 3.545684324  | 0.005839345 | 0.005839345 | -2.024636366 |

|              |              |             |              |             |             |              |
|--------------|--------------|-------------|--------------|-------------|-------------|--------------|
| 1438605_at   | 0.532632487  | 4.541157429 | 3.54041343   | 0.005889071 | 0.005889071 | -2.031260653 |
| 1420699_at   | 0.435200913  | 5.113404104 | 3.540001061  | 0.005892979 | 0.005892979 | -2.031779084 |
| 1444086_at   | 0.318713893  | 5.981532838 | 3.53112259   | 0.0059778   | 0.0059778   | -2.04294739  |
| 1450567_a_at | -0.638885928 | 10.00629942 | -3.528690094 | 0.00600126  | 0.00600126  | -2.046009339 |
| 1455325_at   | 0.231159223  | 8.43576118  | 3.528030856  | 0.006007634 | 0.006007634 | -2.046839321 |
| 1424885_at   | 0.316882499  | 4.616909848 | 3.525317912  | 0.006033942 | 0.006033942 | -2.050255619 |
| 1429893_at   | 0.273210812  | 7.957838288 | 3.524954035  | 0.00603748  | 0.00603748  | -2.050713918 |
| 1455267_at   | -0.232602596 | 4.79100128  | -3.519819769 | 0.006087627 | 0.006087627 | -2.057182613 |
| 1456329_at   | -0.320739872 | 6.180276975 | -3.518051047 | 0.006105003 | 0.006105003 | -2.059411959 |
| 1459622_at   | -0.362029769 | 7.401413733 | -3.513992852 | 0.006145066 | 0.006145066 | -2.064528799 |
| 1430463_a_at | 0.217517975  | 6.820707723 | 3.513618178  | 0.006148779 | 0.006148779 | -2.065001338 |
| 1458719_at   | -1.757025888 | 7.353684857 | -3.50860402  | 0.00619869  | 0.00619869  | -2.07132722  |
| 1456811_at   | 0.351953235  | 4.598182987 | 3.506701868  | 0.006217734 | 0.006217734 | -2.073727968 |
| 1449268_at   | -0.29643054  | 6.915960804 | -3.506113262 | 0.00622364  | 0.00622364  | -2.074470971 |
| 1456830_at   | 0.341232973  | 5.218813333 | 3.50501076   | 0.006234717 | 0.006234717 | -2.075862808 |
| 1447261_at   | -0.336509757 | 5.428003276 | -3.503512298 | 0.006249805 | 0.006249805 | -2.07775481  |
| 1460743_at   | -0.342406139 | 5.592231959 | -3.500718249 | 0.006278041 | 0.006278041 | -2.081283555 |
| 1437686_x_at | -0.270545345 | 5.30261131  | -3.500366704 | 0.006281603 | 0.006281603 | -2.081727621 |
| 1440755_at   | 0.235623387  | 6.017142156 | 3.493301223  | 0.006353642 | 0.006353642 | -2.090656528 |
| 1457910_at   | 0.561295437  | 5.713900154 | 3.492157875  | 0.00636538  | 0.00636538  | -2.092102117 |
| 1442206_at   | 0.28365535   | 5.473134407 | 3.491333043  | 0.006373863 | 0.006373863 | -2.093145111 |
| 1424575_at   | -0.396889395 | 8.529184007 | -3.49050097  | 0.006382431 | 0.006382431 | -2.094197363 |
| 1460555_at   | -0.363221347 | 5.896664459 | -3.484694459 | 0.006442561 | 0.006442561 | -2.101543219 |
| 1417923_at   | -0.283740932 | 7.924598979 | -3.479286159 | 0.006499097 | 0.006499097 | -2.108389773 |
| 1421979_at   | -0.551956594 | 8.236347016 | -3.477963056 | 0.006513007 | 0.006513007 | -2.11006539  |
| 1441840_x_at | 0.330544028  | 5.171458263 | 3.477810985  | 0.006514608 | 0.006514608 | -2.110257994 |
| 1448229_s_at | 0.404756318  | 10.62202406 | 3.476633542  | 0.006527016 | 0.006527016 | -2.111749387 |
| 1423394_at   | 0.227074778  | 9.870261985 | 3.47565695   | 0.006537325 | 0.006537325 | -2.112986528 |
| 1458542_at   | -0.300466679 | 6.716731961 | -3.471923788 | 0.006576893 | 0.006576893 | -2.117716966 |
| 1440771_at   | 0.852582164  | 6.049089928 | 3.47065559   | 0.006590391 | 0.006590391 | -2.119324415 |
| 1423140_at   | -0.886018718 | 6.621798001 | -3.463441178 | 0.00666773  | 0.00666773  | -2.128473199 |
| 1418414_at   | 0.395115557  | 6.095999971 | 3.462661975  | 0.006676139 | 0.006676139 | -2.12946178  |
| 1426235_a_at | 0.278354489  | 7.876525007 | 3.462638904  | 0.006676388 | 0.006676388 | -2.129491053 |
| 1447939_a_at | 0.766280017  | 8.179428102 | 3.45977132   | 0.006707432 | 0.006707432 | -2.133129951 |
| 1457241_at   | -0.434569146 | 4.932221198 | -3.459327724 | 0.006712248 | 0.006712248 | -2.133692972 |
| 1443898_at   | 0.336262135  | 8.221186894 | 3.459200094  | 0.006713634 | 0.006713634 | -2.133854967 |
| 1450876_at   | -0.599998442 | 5.10529378  | -3.458992411 | 0.006715891 | 0.006715891 | -2.134118576 |
| 1431360_s_at | -0.269616027 | 5.663122407 | -3.456913667 | 0.006738518 | 0.006738518 | -2.136757436 |
| 1450772_at   | 0.333979213  | 8.138908906 | 3.456314203  | 0.006745059 | 0.006745059 | -2.137518543 |
| 1429495_at   | -0.282505822 | 5.917503303 | -3.454465659 | 0.006765268 | 0.006765268 | -2.139865863 |
| 1432596_at   | -0.223537485 | 3.571019348 | -3.454395329 | 0.006766038 | 0.006766038 | -2.13995518  |
| 1438050_x_at | 0.282738939  | 7.796338765 | 3.452704619  | 0.006784579 | 0.006784579 | -2.14210253  |
| 1437744_at   | -0.383655735 | 7.580392929 | -3.452011919 | 0.00679219  | 0.00679219  | -2.142982439 |
| 1418460_at   | 0.409278475  | 5.594083149 | 3.451272491  | 0.006800325 | 0.006800325 | -2.143921782 |
| 1428418_s_at | 0.323066342  | 8.579178034 | 3.447923388  | 0.006837298 | 0.006837298 | -2.148177347 |
| 1428385_at   | -0.320499307 | 7.211532729 | -3.445289255 | 0.006866525 | 0.006866525 | -2.151525567 |
| 1459646_at   | 0.416305525  | 6.571627678 | 3.442999703  | 0.006892034 | 0.006892034 | -2.154436604 |
| 1459996_at   | -0.252129402 | 4.892500283 | -3.439850904 | 0.006927278 | 0.006927278 | -2.158441355 |
| 1427522_at   | -0.316030267 | 7.032710105 | -3.437655695 | 0.006951959 | 0.006951959 | -2.161234139 |
| 1451839_a_at | 0.237185412  | 8.128852993 | 3.435231765  | 0.006979318 | 0.006979318 | -2.164318706 |
| 1432269_a_at | 0.262431839  | 7.386630053 | 3.435200215  | 0.006979675 | 0.006979675 | -2.16435886  |
| 1450173_at   | -0.221111473 | 6.829299249 | -3.434937115 | 0.006982651 | 0.006982651 | -2.164693719 |
| 1422699_at   | 0.396431481  | 6.880313681 | 3.431858635  | 0.007017577 | 0.007017577 | -2.168612572 |

|              |              |             |              |             |             |              |
|--------------|--------------|-------------|--------------|-------------|-------------|--------------|
| 1453208_at   | 0.372852505  | 9.502807291 | 3.431755159  | 0.007018754 | 0.007018754 | -2.168744318 |
| 1444196_at   | -0.312808225 | 5.23858277  | -3.429657913 | 0.007042656 | 0.007042656 | -2.171414881 |
| 1440910_at   | -0.501075084 | 6.227219899 | -3.422999731 | 0.0071191   | 0.0071191   | -2.179897332 |
| 1434779_at   | -0.430275682 | 4.98371203  | -3.422592043 | 0.007123809 | 0.007123809 | -2.180416926 |
| 1434962_x_at | 0.475709305  | 7.775200704 | 3.41710658   | 0.007187481 | 0.007187481 | -2.187410379 |
| 1459009_at   | 0.277905638  | 6.870814384 | 3.405947309  | 0.007318842 | 0.007318842 | -2.201650489 |
| 1451906_at   | -0.418624189 | 5.983748366 | -3.404848835 | 0.007331907 | 0.007331907 | -2.203053173 |
| 1460035_at   | 0.546624471  | 7.180496496 | 3.404649106  | 0.007334285 | 0.007334285 | -2.203308232 |
| 1437160_at   | -0.316915252 | 4.65392358  | -3.404302464 | 0.007338415 | 0.007338415 | -2.203750918 |
| 1447270_at   | 0.240670032  | 8.313238801 | 3.402076865  | 0.007364984 | 0.007364984 | -2.206593556 |
| 1429752_x_at | -0.305527662 | 6.591762742 | -3.400749169 | 0.007380882 | 0.007380882 | -2.208289681 |
| 1427820_at   | -1.528543471 | 8.854444319 | -3.398438225 | 0.007408638 | 0.007408638 | -2.211242485 |
| 1456851_at   | 0.580545559  | 4.699919217 | 3.396456173  | 0.00743253  | 0.00743253  | -2.21377564  |
| 1454821_at   | -0.281176295 | 6.776120475 | -3.39604124  | 0.007437542 | 0.007437542 | -2.214306013 |
| 1436309_at   | -0.250365397 | 7.904628859 | -3.393714581 | 0.00746571  | 0.00746571  | -2.217280422 |
| 1457872_at   | -0.343046007 | 4.371700424 | -3.390593316 | 0.007503673 | 0.007503673 | -2.221271836 |
| 1450491_at   | -0.286751579 | 5.764807553 | -3.388520203 | 0.007528998 | 0.007528998 | -2.223923638 |
| 1427481_a_at | -0.224336716 | 3.444086268 | -3.386169103 | 0.007557826 | 0.007557826 | -2.226931743 |
| 1458010_at   | -0.289920041 | 3.661541999 | -3.385687698 | 0.007563743 | 0.007563743 | -2.227547769 |
| 1457440_at   | -0.349591546 | 7.911024861 | -3.384711903 | 0.007575751 | 0.007575751 | -2.228796534 |
| 1448444_at   | 0.302572771  | 3.56317992  | 3.384444697  | 0.007579043 | 0.007579043 | -2.229138511 |
| 1453317_a_at | -0.244411776 | 7.798426891 | -3.383365995 | 0.007592347 | 0.007592347 | -2.230519163 |
| 1423356_at   | 0.259696824  | 7.034196973 | 3.381884484  | 0.007610658 | 0.007610658 | -2.232415639 |
| 1430941_at   | -0.228605133 | 3.831692326 | -3.37955916  | 0.007639491 | 0.007639491 | -2.235392882 |
| 1444993_at   | 0.280180174  | 4.698213044 | 3.375901309  | 0.007685076 | 0.007685076 | -2.240077736 |
| 1436337_at   | 0.24386712   | 4.560707369 | 3.375791619  | 0.007686447 | 0.007686447 | -2.240218252 |
| 1452990_at   | -0.216258311 | 4.633981548 | -3.375497813 | 0.007690122 | 0.007690122 | -2.240594632 |
| 1421970_a_at | 0.826888776  | 6.552502177 | 3.374402179  | 0.00770384  | 0.00770384  | -2.241998301 |
| 1438824_at   | 0.32078413   | 7.258062699 | 3.374143105  | 0.007707087 | 0.007707087 | -2.242330237 |
| 1448475_at   | -0.246139928 | 10.71695153 | -3.373693866 | 0.007712722 | 0.007712722 | -2.242905841 |
| 1451691_at   | 0.312007416  | 8.617742827 | 3.371377448  | 0.007741844 | 0.007741844 | -2.245874276 |
| 1416589_at   | -0.282768718 | 12.9024476  | -3.369690439 | 0.007763125 | 0.007763125 | -2.248036598 |
| 1419588_at   | -0.239137166 | 6.030662848 | -3.369317851 | 0.007767834 | 0.007767834 | -2.248514215 |
| 1438567_at   | 0.497680671  | 6.118806457 | 3.368223796  | 0.007781676 | 0.007781676 | -2.249916781 |
| 1449468_at   | 0.389312796  | 4.854404153 | 3.366928618  | 0.007798096 | 0.007798096 | -2.251577395 |
| 1453239_a_at | 0.330316266  | 3.998377782 | 3.363759036  | 0.007838431 | 0.007838431 | -2.255642239 |
| 1421283_at   | -0.476788856 | 5.823051504 | -3.362947601 | 0.007848792 | 0.007848792 | -2.256683087 |
| 1421908_a_at | 0.227091757  | 10.84726354 | 3.362616199  | 0.007853027 | 0.007853027 | -2.257108209 |
| 1418571_at   | 0.338213421  | 8.171480615 | 3.362394591  | 0.007855861 | 0.007855861 | -2.257392496 |
| 1459802_at   | -0.405560786 | 4.723791795 | -3.361023655 | 0.007873415 | 0.007873415 | -2.259151334 |
| 1457227_at   | 0.279410142  | 5.905685144 | 3.36009835   | 0.007885285 | 0.007885285 | -2.260338593 |
| 1444596_at   | -0.510902977 | 4.66348431  | -3.358306702 | 0.007908323 | 0.007908323 | -2.262637788 |
| 1423903_at   | -0.28011306  | 6.5817294   | -3.356203579 | 0.007935455 | 0.007935455 | -2.265337245 |
| 1425285_a_at | 0.234729781  | 4.289585085 | 3.355567808  | 0.007943676 | 0.007943676 | -2.266153404 |
| 1436070_at   | -0.397193947 | 7.610502744 | -3.350923956 | 0.008003993 | 0.008003993 | -2.27211651  |
| 1426559_at   | 0.243315138  | 9.942377559 | 3.350909928  | 0.008004176 | 0.008004176 | -2.272134527 |
| 1424608_a_at | 0.325813295  | 6.786173984 | 3.348269747  | 0.00803868  | 0.00803868  | -2.275526041 |
| 1425063_at   | 0.202052577  | 3.514661624 | 3.347001242  | 0.008055313 | 0.008055313 | -2.277155863 |
| 1433891_at   | 0.224817967  | 10.32231428 | 3.34696239   | 0.008055823 | 0.008055823 | -2.277205786 |
| 1457132_at   | -0.283925825 | 6.196267691 | -3.345585214 | 0.008073922 | 0.008073922 | -2.278975483 |
| 1436359_at   | 0.632243653  | 5.570502865 | 3.343796342  | 0.008097495 | 0.008097495 | -2.281274596 |
| 1432176_a_at | 0.255961989  | 6.94733865  | 3.343538493  | 0.008100899 | 0.008100899 | -2.281606025 |
| 1431923_at   | -0.206293243 | 4.676884954 | -3.34090943  | 0.008135688 | 0.008135688 | -2.28498584  |



|              |              |             |              |             |             |              |
|--------------|--------------|-------------|--------------|-------------|-------------|--------------|
| 1455353_at   | 0.295012706  | 7.788428592 | 3.340839655  | 0.008136614 | 0.008136614 | -2.285075554 |
| 1445738_at   | -0.220305446 | 4.188874031 | -3.336574135 | 0.008193395 | 0.008193395 | -2.290561121 |
| 1456609_at   | 0.365323809  | 7.612104721 | 3.335901779  | 0.008202382 | 0.008202382 | -2.291426009 |
| 1434145_s_at | 0.380926824  | 6.615652781 | 3.335413965  | 0.008208909 | 0.008208909 | -2.292053546 |
| 1440545_at   | -0.276671892 | 4.687843718 | -3.334741536 | 0.008217915 | 0.008217915 | -2.292918631 |
| 1440862_at   | 0.57779681   | 7.308592083 | 3.333571142  | 0.008233615 | 0.008233615 | -2.294424493 |
| 1453752_at   | -0.891022828 | 8.295529947 | -3.330001441 | 0.008281693 | 0.008281693 | -2.299018486 |
| 1457169_at   | -0.295502996 | 7.374095505 | -3.329365319 | 0.008290291 | 0.008290291 | -2.299837313 |
| 1421752_a_at | 0.375890577  | 7.655404455 | 3.329158648  | 0.008293086 | 0.008293086 | -2.300103356 |
| 1450342_at   | -0.252374723 | 4.772546565 | -3.325807974 | 0.008338543 | 0.008338543 | -2.304417371 |
| 1457851_at   | 0.329419462  | 5.144310965 | 3.324167653  | 0.008360891 | 0.008360891 | -2.306529832 |
| 1419130_at   | 0.572412512  | 7.927799014 | 3.322542762  | 0.008383089 | 0.008383089 | -2.30862277  |
| 1424111_at   | -0.379874247 | 8.989805047 | -3.320416874 | 0.008412224 | 0.008412224 | -2.311361537 |
| 1445957_at   | 0.394874236  | 6.632606352 | 3.319292118  | 0.008427681 | 0.008427681 | -2.312810791 |
| 1446937_at   | -0.23520756  | 4.918505322 | -3.315292096 | 0.008482891 | 0.008482891 | -2.317966175 |
| 1436892_at   | 0.460480326  | 6.755034157 | 3.313435879  | 0.008508638 | 0.008508638 | -2.320359246 |
| 1435578_s_at | 0.264490036  | 5.069899911 | 3.308092585  | 0.008583207 | 0.008583207 | -2.327250417 |
| 1434156_at   | -0.260721098 | 7.666575082 | -3.306730646 | 0.008602322 | 0.008602322 | -2.329007481 |
| 1421851_at   | 0.661715207  | 6.907526056 | 3.306618581  | 0.008603897 | 0.008603897 | -2.329152069 |
| 1437552_at   | 0.277791253  | 7.235114747 | 3.306544761  | 0.008604934 | 0.008604934 | -2.329247313 |
| 1449065_at   | 0.273380578  | 7.527595164 | 3.304788076  | 0.008629662 | 0.008629662 | -2.331514042 |
| 1426153_a_at | 0.295411612  | 4.424707627 | 3.299513732  | 0.008704349 | 0.008704349 | -2.338322142 |
| 1433551_at   | 0.567549407  | 6.669347691 | 3.29920197   | 0.008708785 | 0.008708785 | -2.338724675 |
| 1459033_at   | 0.213170926  | 3.632931972 | 3.298180593  | 0.008723332 | 0.008723332 | -2.340043517 |
| 1453473_a_at | 0.345135147  | 11.59925974 | 3.298048845  | 0.008725211 | 0.008725211 | -2.340213646 |
| 1427551_at   | -0.281854873 | 4.777327383 | -3.29771719  | 0.008729941 | 0.008729941 | -2.340641925 |
| 1452201_at   | 0.239843656  | 6.529810308 | 3.29731493   | 0.008735682 | 0.008735682 | -2.3411614   |
| 1444334_at   | 0.223889343  | 4.481579082 | 3.29706076   | 0.008739312 | 0.008739312 | -2.341489643 |
| 1417086_at   | 0.246545565  | 9.276370462 | 3.296883187  | 0.008741848 | 0.008741848 | -2.341718971 |
| 1417545_at   | -0.301737816 | 6.564467494 | -3.296708404 | 0.008744346 | 0.008744346 | -2.341944701 |
| 1421977_at   | 0.211854999  | 3.367978491 | 3.295279904  | 0.008764786 | 0.008764786 | -2.343789728 |
| 1451867_x_at | 0.36430994   | 6.348436742 | 3.294578253  | 0.008774844 | 0.008774844 | -2.344696065 |
| 1442364_at   | -0.382786576 | 7.473786086 | -3.29332491  | 0.008792839 | 0.008792839 | -2.346315189 |
| 1437492_at   | -0.267316076 | 7.922010905 | -3.292144685 | 0.00880982  | 0.00880982  | -2.347840039 |
| 1423172_at   | 0.246645151  | 5.883728657 | 3.290313251  | 0.008836238 | 0.008836238 | -2.3502066   |
| 1450546_at   | 0.300950227  | 3.720714945 | 3.287572041  | 0.008875931 | 0.008875931 | -2.353749562 |
| 1455803_at   | -0.292475295 | 5.779870021 | -3.280750591 | 0.008975512 | 0.008975512 | -2.362570281 |
| 1432874_at   | -0.24851996  | 4.144281843 | -3.280706788 | 0.008976155 | 0.008976155 | -2.362626941 |
| 1434993_at   | 0.30665856   | 3.843518236 | 3.280610101  | 0.008977575 | 0.008977575 | -2.362752007 |
| 1439539_at   | -0.216126762 | 8.344789515 | -3.280163806 | 0.008984131 | 0.008984131 | -2.363329317 |
| 1445837_at   | 0.340114432  | 7.999600479 | 3.279944727  | 0.008987352 | 0.008987352 | -2.363612718 |
| 1429746_at   | -0.245373268 | 3.838571073 | -3.278474048 | 0.009009002 | 0.009009002 | -2.36551535  |
| 1423875_at   | -0.230211011 | 7.29455365  | -3.278452498 | 0.009009319 | 0.009009319 | -2.365543232 |
| 1419756_at   | 0.254087521  | 3.568081864 | 3.275701646  | 0.009049961 | 0.009049961 | -2.369102769 |
| 1417101_at   | -0.452527477 | 5.661964284 | -3.274611493 | 0.009066119 | 0.009066119 | -2.370513664 |
| 1419394_s_at | 0.729341976  | 5.453492183 | 3.273667426  | 0.009080136 | 0.009080136 | -2.371735612 |
| 1436570_at   | -0.298893876 | 8.509860914 | -3.272983411 | 0.009090306 | 0.009090306 | -2.372621032 |
| 1424734_at   | -0.201480316 | 4.424548638 | -3.272241279 | 0.009101354 | 0.009101354 | -2.373581749 |
| 1433525_at   | 0.396550591  | 8.862230436 | 3.271465984  | 0.00911291  | 0.00911291  | -2.374585468 |
| 1426284_at   | 0.42966557   | 4.815165258 | 3.26920639   | 0.009146677 | 0.009146677 | -2.377511233 |
| 1425293_a_at | 0.326513931  | 7.241108398 | 3.268540168  | 0.009156657 | 0.009156657 | -2.37837399  |
| 1457797_at   | 0.649057703  | 7.429493214 | 3.267083793  | 0.009178514 | 0.009178514 | -2.380260189 |
| 1421471_at   | -0.313173523 | 3.889396005 | -3.267064679 | 0.009178801 | 0.009178801 | -2.380284946 |

|              |              |             |              |             |             |              |
|--------------|--------------|-------------|--------------|-------------|-------------|--------------|
| 1457361_at   | 0.378623198  | 4.053608989 | 3.266753784  | 0.009183474 | 0.009183474 | -2.380687631 |
| 1425394_at   | -0.206228737 | 3.393480867 | -3.266370599 | 0.009189237 | 0.009189237 | -2.381183966 |
| 1423340_at   | 1.270653328  | 6.788940542 | 3.26583398   | 0.009197314 | 0.009197314 | -2.381879072 |
| 1441251_a_at | -0.280524318 | 4.935810321 | -3.265581948 | 0.00920111  | 0.00920111  | -2.382205553 |
| 1449077_at   | 0.31631696   | 9.475425377 | 3.26548473   | 0.009202574 | 0.009202574 | -2.38233149  |
| 1440962_at   | -0.355203359 | 9.933566409 | -3.263525359 | 0.009232145 | 0.009232145 | -2.38486994  |
| 1442324_at   | 0.449669149  | 5.923925642 | 3.263031148  | 0.009239619 | 0.009239619 | -2.385510286 |
| 1425245_a_at | 0.23010513   | 6.518659762 | 3.260575609  | 0.009276848 | 0.009276848 | -2.388692362 |
| 1446328_at   | -0.290494038 | 4.483200489 | -3.25799545  | 0.009316133 | 0.009316133 | -2.392036729 |
| 1459256_at   | -0.237995749 | 7.822187687 | -3.257000092 | 0.009331334 | 0.009331334 | -2.393327118 |
| 1450414_at   | 0.26613133   | 7.284207822 | 3.256768829  | 0.00933487  | 0.00933487  | -2.393626947 |
| 1424741_s_at | -0.28011881  | 8.806585108 | -3.256091461 | 0.009345233 | 0.009345233 | -2.39450518  |
| 1424108_at   | -0.607175036 | 10.43425654 | -3.253084508 | 0.009391382 | 0.009391382 | -2.398404489 |
| 1427514_at   | 0.258089726  | 5.440132884 | 3.252092263  | 0.009406662 | 0.009406662 | -2.399691439 |
| 1430033_at   | 0.250960107  | 7.122096511 | 3.251209797  | 0.009420274 | 0.009420274 | -2.400836106 |
| 1436492_x_at | 0.23512754   | 5.190865204 | 3.251078715  | 0.009422297 | 0.009422297 | -2.401006144 |
| 1435334_at   | -0.235648794 | 6.703695156 | -3.249246472 | 0.009450629 | 0.009450629 | -2.403383121 |
| 1418133_at   | 0.279492064  | 5.822114742 | 3.24886979   | 0.009456464 | 0.009456464 | -2.403871843 |
| 1448932_at   | 0.290163226  | 4.629411935 | 3.248795127  | 0.009457622 | 0.009457622 | -2.403968717 |
| 1416623_at   | -0.25276541  | 8.837510953 | -3.245912133 | 0.009502414 | 0.009502414 | -2.407709825 |
| 1436293_x_at | -0.414346417 | 7.026313795 | -3.244233598 | 0.009528593 | 0.009528593 | -2.409888436 |
| 1443195_at   | 0.316766455  | 5.405854518 | 3.243702979  | 0.009536885 | 0.009536885 | -2.41057721  |
| 1428289_at   | -0.208112973 | 8.589122671 | -3.242618361 | 0.009553856 | 0.009553856 | -2.411985214 |
| 1419295_at   | -0.400572533 | 9.392281579 | -3.241577457 | 0.009570173 | 0.009570173 | -2.413336603 |
| 1420819_at   | 0.243156391  | 5.721608589 | 3.240439525  | 0.009588044 | 0.009588044 | -2.414814113 |
| 1427682_a_at | 0.35901248   | 3.80445558  | 3.239788485  | 0.009598284 | 0.009598284 | -2.415659505 |
| 1424623_at   | 0.365177735  | 6.925374717 | 3.238551756  | 0.009617766 | 0.009617766 | -2.417265568 |
| 1425985_s_at | -0.466336851 | 6.979000613 | -3.23844018  | 0.009619526 | 0.009619526 | -2.417410474 |
| 1443963_at   | 0.402622144  | 4.202694212 | 3.2363382    | 0.00965274  | 0.00965274  | -2.420140635 |
| 1421633_a_at | -0.655428534 | 6.003609144 | -3.234837565 | 0.009676524 | 0.009676524 | -2.422090065 |
| 1446396_at   | 0.331935158  | 7.243316995 | 3.233811354  | 0.009692823 | 0.009692823 | -2.423423339 |
| 1438665_at   | -0.394520303 | 8.46470761  | -3.233086391 | 0.009704355 | 0.009704355 | -2.424365302 |
| 1415708_at   | 0.286867832  | 11.42521221 | 3.230193241  | 0.009750518 | 0.009750518 | -2.428125074 |
| 1450339_a_at | 0.280940066  | 8.805246747 | 3.228401121  | 0.009779226 | 0.009779226 | -2.430454511 |
| 1419968_at   | -0.229956446 | 5.758733127 | -3.228369691 | 0.00977973  | 0.00977973  | -2.430495369 |
| 1429778_at   | -0.350943113 | 4.98569207  | -3.228128823 | 0.009783596 | 0.009783596 | -2.430808484 |
| 1423858_a_at | -0.291961014 | 6.636860611 | -3.227746481 | 0.009789735 | 0.009789735 | -2.431305523 |
| 1428764_at   | 0.386331021  | 7.879856412 | 3.227353956  | 0.009796041 | 0.009796041 | -2.431815817 |
| 1421271_at   | 0.28604356   | 6.592222857 | 3.225316907  | 0.009828837 | 0.009828837 | -2.434464338 |
| 1428722_at   | -0.303577054 | 3.684825464 | -3.225173162 | 0.009831156 | 0.009831156 | -2.43465125  |
| 1437641_at   | -0.250073064 | 4.560051562 | -3.224696428 | 0.009838849 | 0.009838849 | -2.435271167 |
| 1420855_at   | -0.315117466 | 10.47629248 | -3.221600551 | 0.009888962 | 0.009888962 | -2.43929752  |
| 1435688_at   | -0.461469922 | 6.005824368 | -3.220207486 | 0.009911597 | 0.009911597 | -2.441109646 |
| 1438654_x_at | 0.263779781  | 5.090983825 | 3.220170735  | 0.009912195 | 0.009912195 | -2.441157455 |
| 1456398_at   | 0.290334128  | 9.610783525 | 3.220055206  | 0.009914075 | 0.009914075 | -2.441307749 |
| 1457115_at   | -0.258604404 | 5.460056128 | -3.218391625 | 0.009941183 | 0.009941183 | -2.443472097 |
| 1445488_at   | -0.23955472  | 3.743616194 | -3.217184326 | 0.009960904 | 0.009960904 | -2.445043017 |
| 1434600_at   | 0.263503713  | 8.438033698 | 3.217147606  | 0.009961504 | 0.009961504 | -2.445090799 |
| 1423325_at   | 0.22517011   | 8.941969443 | 3.213926211  | 0.010014325 | 0.010014325 | -2.449283289 |
| 1446326_at   | -0.363531994 | 9.930694787 | -3.213797763 | 0.010016438 | 0.010016438 | -2.449450483 |
| 1438201_at   | 0.402839065  | 6.57938373  | 3.213497752  | 0.010021373 | 0.010021373 | -2.449840999 |
| 1444946_at   | -0.456101755 | 5.011116229 | -3.211569354 | 0.010053154 | 0.010053154 | -2.452351396 |
| 1449894_at   | -0.350143868 | 4.429147094 | -3.210122474 | 0.010077068 | 0.010077068 | -2.454235235 |

|              |              |             |              |             |             |              |
|--------------|--------------|-------------|--------------|-------------|-------------|--------------|
| 1441827_x_at | -0.310376132 | 3.803464903 | -3.207020602 | 0.010128533 | 0.010128533 | -2.4582747   |
| 1429284_at   | 0.352418506  | 6.966617153 | 3.206478178  | 0.010137561 | 0.010137561 | -2.458981196 |
| 1418925_at   | -0.538152961 | 7.333746053 | -3.205736637 | 0.010149916 | 0.010149916 | -2.459947092 |
| 1440888_at   | -0.245413285 | 5.095352892 | -3.204910606 | 0.010163697 | 0.010163697 | -2.461023117 |
| 1428116_a_at | 0.298251076  | 12.5305554  | 3.204628428  | 0.010168409 | 0.010168409 | -2.461390713 |
| 1428417_at   | 0.228439404  | 7.952431645 | 3.203747385  | 0.010183136 | 0.010183136 | -2.462538515 |
| 1440038_at   | 0.25197836   | 5.208566266 | 3.201976814  | 0.010212798 | 0.010212798 | -2.464845445 |
| 1450213_at   | -0.260498599 | 4.793960099 | -3.200837235 | 0.010231937 | 0.010231937 | -2.466330429 |
| 1439612_at   | 0.240045461  | 6.058722798 | 3.20062617   | 0.010235486 | 0.010235486 | -2.466605484 |
| 1416626_at   | -0.231913465 | 4.655213128 | -3.200619604 | 0.010235596 | 0.010235596 | -2.466614041 |
| 1424109_a_at | -0.564385169 | 11.40125052 | -3.197692926 | 0.010284936 | 0.010284936 | -2.470428551 |
| 1455744_at   | 0.40297753   | 9.035849404 | 3.189033269  | 0.010432367 | 0.010432367 | -2.481720949 |
| 1426319_at   | -0.291887228 | 4.823034152 | -3.18859381  | 0.010439907 | 0.010439907 | -2.482294243 |
| 1430697_at   | 0.447294393  | 7.521011335 | 3.187478656  | 0.010459064 | 0.010459064 | -2.483749109 |
| 1450738_at   | 0.299967966  | 7.480061784 | 3.186538421  | 0.010475245 | 0.010475245 | -2.484975879 |
| 1455660_at   | 0.341428914  | 6.915336378 | 3.185335846  | 0.010495978 | 0.010495978 | -2.486545085 |
| 1457065_at   | -0.416945825 | 7.287626601 | -3.184382266 | 0.010512449 | 0.010512449 | -2.4877895   |
| 1447478_at   | 0.340131232  | 4.198787686 | 3.183874057  | 0.010521237 | 0.010521237 | -2.488452751 |
| 1454476_at   | -0.205307062 | 4.198630106 | -3.183006468 | 0.010536258 | 0.010536258 | -2.489585089 |
| 1449903_at   | 0.289031888  | 4.033555538 | 3.181352329  | 0.010564959 | 0.010564959 | -2.49174423  |
| 1420031_at   | -0.210650196 | 3.954805272 | -3.178441121 | 0.010615667 | 0.010615667 | -2.49554497  |
| 1440699_at   | 0.35872337   | 5.378254492 | 3.177399948  | 0.010633863 | 0.010633863 | -2.496904508 |
| 1458457_at   | -0.242525013 | 5.062467161 | -3.177138728 | 0.010638433 | 0.010638433 | -2.497245622 |
| 1424938_at   | -0.369215361 | 4.014214513 | -3.176245935 | 0.010654068 | 0.010654068 | -2.498411534 |
| 1418366_at   | -0.343491551 | 6.830745368 | -3.175060314 | 0.010674869 | 0.010674869 | -2.499959992 |
| 1417782_at   | 0.341209156  | 5.163530478 | 3.174639461  | 0.010682262 | 0.010682262 | -2.500509677 |
| 1437351_at   | 0.279465541  | 7.703324058 | 3.172689633  | 0.010716585 | 0.010716585 | -2.503056646 |
| 1420325_at   | -0.231610829 | 4.960168871 | -3.17189612  | 0.010730586 | 0.010730586 | -2.504093298 |
| 1460384_a_at | 0.329588796  | 6.96159281  | 3.166439182  | 0.01082738  | 0.01082738  | -2.511224177 |
| 1435746_at   | 0.269071364  | 6.979667665 | 3.165929031  | 0.010836475 | 0.010836475 | -2.511890988 |
| 1431080_at   | 0.285855902  | 3.841074213 | 3.162931302  | 0.010890076 | 0.010890076 | -2.515809861 |
| 1449491_at   | 0.270128016  | 7.522948833 | 3.162089166  | 0.010905184 | 0.010905184 | -2.516910947 |
| 1448136_at   | 0.423068017  | 9.832474876 | 3.161463172  | 0.010916427 | 0.010916427 | -2.51772948  |
| 1443153_at   | -1.500558313 | 6.134906397 | -3.161110465 | 0.010922872 | 0.010922872 | -2.518198293 |
| 1454529_at   | 0.229841189  | 3.719970525 | 3.160853857  | 0.010927383 | 0.010927383 | -2.518526246 |
| 1442026_at   | -0.200159811 | 4.02004913  | -3.16079699  | 0.010928406 | 0.010928406 | -2.518600609 |
| 1436111_at   | -0.599455876 | 5.77625562  | -3.159869618 | 0.010945104 | 0.010945104 | -2.519813363 |
| 1455074_at   | -0.518073289 | 7.588966581 | -3.157526501 | 0.01098741  | 0.01098741  | -2.522877952 |
| 1453418_at   | -0.488046458 | 8.098160042 | -3.157037028 | 0.010996269 | 0.010996269 | -2.523518216 |
| 1439947_at   | -0.249089012 | 4.048510224 | -3.155217266 | 0.011029269 | 0.011029269 | -2.525898816 |
| 1456766_at   | -0.498686579 | 5.949276427 | -3.154892959 | 0.011035161 | 0.011035161 | -2.52632311  |
| 1426020_at   | 0.405408685  | 6.357858777 | 3.154625434  | 0.011040023 | 0.011040023 | -2.526673124 |
| 1460608_at   | 0.325278938  | 4.012540946 | 3.153119135  | 0.011067444 | 0.011067444 | -2.528644025 |
| 1436515_at   | 0.256460896  | 7.586186961 | 3.152092211  | 0.011086178 | 0.011086178 | -2.529987835 |
| 1458874_at   | -0.268503932 | 6.420433791 | -3.150107597 | 0.011122475 | 0.011122475 | -2.532585181 |
| 1431023_at   | 0.214657389  | 6.213036452 | 3.148570166  | 0.011150678 | 0.011150678 | -2.534597573 |
| 1436577_at   | 0.22631159   | 6.272694667 | 3.147341184  | 0.011173276 | 0.011173276 | -2.536206412 |
| 1427894_at   | -0.258375653 | 8.759608968 | -3.147227576 | 0.011175368 | 0.011175368 | -2.536355143 |
| 1431995_at   | 0.237513789  | 6.252566612 | 3.146856997  | 0.011182192 | 0.011182192 | -2.536840298 |
| 1459968_at   | -0.265872035 | 5.397717254 | -3.142679327 | 0.011259425 | 0.011259425 | -2.542310647 |
| 1434819_at   | 0.342156932  | 7.576881505 | 3.14261131   | 0.011260687 | 0.011260687 | -2.542399725 |
| 1418783_at   | -0.220624124 | 6.764969513 | -3.142464754 | 0.011263406 | 0.011263406 | -2.542591665 |
| 1454595_at   | -0.299425851 | 4.46020806  | -3.14209957  | 0.011270186 | 0.011270186 | -2.543069945 |

|              |              |             |              |             |             |              |
|--------------|--------------|-------------|--------------|-------------|-------------|--------------|
| 1435154_at   | 0.264177742  | 4.949853837 | 3.141531019  | 0.01128075  | 0.01128075  | -2.543814601 |
| 1416930_at   | 0.728955875  | 7.108933978 | 3.139615795  | 0.011316409 | 0.011316409 | -2.546323307 |
| 1449960_at   | -0.277640097 | 3.84808951  | -3.138432967 | 0.01133849  | 0.01133849  | -2.547872863 |
| 1460187_at   | -0.399637121 | 9.525550126 | -3.137904194 | 0.011348376 | 0.011348376 | -2.548565626 |
| 1416129_at   | 0.270413678  | 8.61336113  | 3.135928702  | 0.011385386 | 0.011385386 | -2.55115405  |
| 1426528_at   | -0.229420168 | 9.077778327 | -3.135699823 | 0.011389682 | 0.011389682 | -2.551453969 |
| 1449863_a_at | -0.300114427 | 8.141823943 | -3.134696405 | 0.011408536 | 0.011408536 | -2.552768899 |
| 1426008_a_at | -0.332437361 | 5.060194634 | -3.134390187 | 0.011414296 | 0.011414296 | -2.553170203 |
| 1417267_s_at | -0.392102363 | 8.413634834 | -3.134211747 | 0.011417654 | 0.011417654 | -2.553404058 |
| 1459837_at   | -0.251420105 | 3.443369888 | -3.133637085 | 0.011428475 | 0.011428475 | -2.554157202 |
| 1452613_at   | -0.259759293 | 4.702541659 | -3.13311952  | 0.01143823  | 0.01143823  | -2.554835545 |
| 1439153_at   | -0.346632789 | 7.26836936  | -3.131741809 | 0.011464238 | 0.011464238 | -2.556641372 |
| 1442750_at   | 0.256385064  | 6.339516971 | 3.130204147  | 0.011493338 | 0.011493338 | -2.558657091 |
| 1441260_a_at | -0.243426774 | 3.887522303 | -3.129338162 | 0.011509759 | 0.011509759 | -2.559792419 |
| 1434325_x_at | 0.27624965   | 8.437855803 | 3.128324797  | 0.011529007 | 0.011529007 | -2.561121067 |
| 1428131_a_at | 0.221084534  | 9.33546217  | 3.12668566   | 0.01156021  | 0.01156021  | -2.563270409 |
| 1445831_at   | -0.259519684 | 8.791094142 | -3.12569262  | 0.011579156 | 0.011579156 | -2.564572684 |
| 1437089_at   | -0.2288415   | 6.229100569 | -3.12567473  | 0.011579497 | 0.011579497 | -2.564596147 |
| 1458086_at   | -0.218565938 | 6.090873914 | -3.123772505 | 0.01161588  | 0.01161588  | -2.567091022 |
| 1449154_at   | -0.345622838 | 10.1393408  | -3.121937419 | 0.01165109  | 0.01165109  | -2.5694982   |
| 1420410_at   | 0.593866294  | 7.487669116 | 3.121932233  | 0.011651189 | 0.011651189 | -2.569505004 |
| 1437142_a_at | 0.267742536  | 8.775357675 | 3.121867739  | 0.011652429 | 0.011652429 | -2.569589609 |
| 1418819_at   | -0.249251855 | 8.179081141 | -3.121754364 | 0.011654608 | 0.011654608 | -2.569738342 |
| 1425904_at   | -0.35450126  | 6.370921323 | -3.12089599  | 0.01167112  | 0.01167112  | -2.570864453 |
| 1450625_at   | -0.212753524 | 12.01350813 | -3.12078207  | 0.011673314 | 0.011673314 | -2.571013911 |
| 1459178_at   | 0.234489265  | 4.15135856  | 3.117597682  | 0.011734793 | 0.011734793 | -2.575192256 |
| 1429517_at   | 0.370144007  | 5.850564677 | 3.116823466  | 0.011749791 | 0.011749791 | -2.57620829  |
| 1444836_at   | 0.28222585   | 3.940414913 | 3.115970866  | 0.01176633  | 0.01176633  | -2.577327264 |
| 1454506_at   | -0.316563487 | 5.059293017 | -3.114336707 | 0.011798097 | 0.011798097 | -2.579472184 |
| 1417347_at   | -0.224011032 | 3.621142361 | -3.111106156 | 0.011861156 | 0.011861156 | -2.583713263 |
| 1427610_at   | 0.383280197  | 8.1757568   | 3.107128812  | 0.011939268 | 0.011939268 | -2.588936208 |
| 1460330_at   | 0.423363734  | 8.650396003 | 3.106455596  | 0.011952542 | 0.011952542 | -2.589820419 |
| 1435936_at   | -0.416480244 | 8.766878466 | -3.104977721 | 0.011981735 | 0.011981735 | -2.59176164  |
| 1419646_a_at | -0.278997545 | 5.359970313 | -3.102398734 | 0.012032853 | 0.012032853 | -2.595149728 |
| 1447316_at   | -0.21717834  | 4.219409292 | -3.101315651 | 0.012054387 | 0.012054387 | -2.596572807 |
| 1437614_x_at | -0.528110827 | 7.231393336 | -3.100351283 | 0.012073595 | 0.012073595 | -2.597840004 |
| 1448416_at   | 0.280434805  | 9.592988197 | 3.100331957  | 0.01207398  | 0.01207398  | -2.597865401 |
| 1424559_at   | 0.191061916  | 7.414063387 | 3.100143368  | 0.01207774  | 0.01207774  | -2.598113221 |
| 1442226_at   | -0.367502726 | 7.189198041 | -3.099356036 | 0.01209345  | 0.01209345  | -2.599147876 |
| 1453773_at   | -0.26161662  | 4.254804122 | -3.098321426 | 0.012114127 | 0.012114127 | -2.600507581 |
| 1457324_at   | 0.749057858  | 8.070382967 | 3.097427279  | 0.012132025 | 0.012132025 | -2.601682774 |
| 1445906_at   | -0.209829222 | 3.49647612  | -3.09627459  | 0.012155139 | 0.012155139 | -2.603197891 |
| 1429842_at   | -0.579536485 | 4.513866048 | -3.095347793 | 0.012173756 | 0.012173756 | -2.604416189 |
| 1438588_at   | -0.376433084 | 9.628942815 | -3.094794604 | 0.012184882 | 0.012184882 | -2.605143411 |
| 1433804_at   | 0.29685114   | 6.613332961 | 3.094325328  | 0.012194329 | 0.012194329 | -2.605760345 |
| 1419662_at   | -0.270234444 | 11.84833026 | -3.094228085 | 0.012196288 | 0.012196288 | -2.605888188 |
| 1431382_a_at | -0.308015334 | 5.085595965 | -3.0922693   | 0.012235806 | 0.012235806 | -2.608463564 |
| 1425175_at   | -0.206000094 | 6.630431539 | -3.092259253 | 0.012236009 | 0.012236009 | -2.608476774 |
| 1456883_at   | -0.360745154 | 4.850805175 | -3.091161322 | 0.012258218 | 0.012258218 | -2.609920482 |
| 1460412_at   | -0.404658474 | 4.850565488 | -3.090511161 | 0.012271389 | 0.012271389 | -2.610775458 |
| 1443300_at   | 0.394614444  | 5.239190887 | 3.090454724  | 0.012272533 | 0.012272533 | -2.610849677 |
| 1459289_at   | 0.359419245  | 6.410874052 | 3.090418299  | 0.012273271 | 0.012273271 | -2.610897578 |
| 1436675_at   | -0.594312944 | 4.818971099 | -3.090125028 | 0.012279218 | 0.012279218 | -2.611283252 |



|              |              |             |              |             |             |              |
|--------------|--------------|-------------|--------------|-------------|-------------|--------------|
| 1455202_at   | 0.227835768  | 5.678027686 | 3.090025704  | 0.012281233 | 0.012281233 | -2.611413873 |
| 1438713_at   | 0.364044968  | 6.471549619 | 3.088551293  | 0.01231118  | 0.01231118  | -2.613352985 |
| 1449939_s_at | -0.3955838   | 12.15886373 | -3.08591419  | 0.012364929 | 0.012364929 | -2.616821781 |
| 1445774_at   | -0.27060132  | 6.539689027 | -3.0845649   | 0.012392524 | 0.012392524 | -2.618596877 |
| 1460138_at   | 0.241920482  | 6.064015811 | 3.083464746  | 0.01241507  | 0.01241507  | -2.620044349 |
| 1431782_s_at | 0.197483396  | 6.735706402 | 3.083092831  | 0.012422701 | 0.012422701 | -2.620533705 |
| 1432249_a_at | 0.198778774  | 7.217340178 | 3.082767497  | 0.012429381 | 0.012429381 | -2.620961782 |
| 1419188_s_at | 0.40897041   | 7.789152936 | 3.082123826  | 0.012442607 | 0.012442607 | -2.621808759 |
| 1421457_a_at | 0.261383386  | 4.783506951 | 3.081988054  | 0.012445399 | 0.012445399 | -2.62198742  |
| 1449122_at   | 0.205446713  | 6.543440037 | 3.081001292  | 0.012465708 | 0.012465708 | -2.623285948 |
| 1441306_at   | -0.3338935   | 6.287174069 | -3.08091909  | 0.012467401 | 0.012467401 | -2.623394125 |
| 1440801_s_at | 0.276436173  | 6.764658089 | 3.07993999   | 0.012487589 | 0.012487589 | -2.624682672 |
| 1440754_at   | 0.214802806  | 4.437414848 | 3.078640959  | 0.012514425 | 0.012514425 | -2.626392411 |
| 1448277_at   | -0.262407492 | 9.363042093 | -3.077385887 | 0.012540409 | 0.012540409 | -2.628044447 |
| 1420465_s_at | -1.090795411 | 6.511584392 | -3.075308624 | 0.012583537 | 0.012583537 | -2.630779064 |
| 1460723_at   | -0.206410543 | 5.37078354  | -3.072392743 | 0.012644333 | 0.012644333 | -2.634618389 |
| 1447937_a_at | 0.849832612  | 7.451477007 | 3.072295715  | 0.012646361 | 0.012646361 | -2.634746159 |
| 1445838_at   | -0.195782892 | 6.597277881 | -3.069018062 | 0.012715072 | 0.012715072 | -2.639062841 |
| 1452770_at   | -0.258864905 | 11.00406206 | -3.06786698  | 0.012739293 | 0.012739293 | -2.640579066 |
| 1425767_a_at | 0.194178763  | 8.305970015 | 3.067794573  | 0.012740818 | 0.012740818 | -2.640674445 |
| 1417513_at   | 0.196710718  | 10.48610367 | 3.067351426  | 0.012750157 | 0.012750157 | -2.641258204 |
| 1427018_at   | -0.463363844 | 5.8834658   | -3.064779583 | 0.012804493 | 0.012804493 | -2.644646467 |
| 1433265_at   | -0.235685397 | 3.818942462 | -3.063763527 | 0.012826025 | 0.012826025 | -2.645985242 |
| 1418063_at   | -0.73875195  | 8.194074405 | -3.063711044 | 0.012827138 | 0.012827138 | -2.646054397 |
| 1439116_at   | 0.371107637  | 4.598477139 | 3.063709805  | 0.012827164 | 0.012827164 | -2.646056029 |
| 1432346_a_at | -0.23922706  | 4.885390504 | -3.062803361 | 0.012846406 | 0.012846406 | -2.647250463 |
| 1445093_at   | 0.296821895  | 6.502656867 | 3.062604881  | 0.012850624 | 0.012850624 | -2.647512013 |
| 1457534_at   | 0.219518978  | 5.913080516 | 3.061290335  | 0.012878591 | 0.012878591 | -2.649244374 |
| 1446204_at   | -0.250797167 | 5.11808504  | -3.060126117 | 0.012903412 | 0.012903412 | -2.650778763 |
| 1443536_at   | 0.232065055  | 3.944636384 | 3.059675223  | 0.012913039 | 0.012913039 | -2.651373057 |
| 1453735_at   | 0.239097395  | 6.729496405 | 3.057876026  | 0.012951524 | 0.012951524 | -2.653744652 |
| 1426057_a_at | 0.273844619  | 8.076986082 | 3.057647167  | 0.012956427 | 0.012956427 | -2.654046341 |
| 1451796_s_at | -0.643097954 | 6.647001804 | -3.057380231 | 0.012962149 | 0.012962149 | -2.654398233 |
| 1423450_a_at | -0.282095311 | 6.809737168 | -3.056487857 | 0.012981297 | 0.012981297 | -2.655574663 |
| 1433201_at   | 0.220393292  | 3.950338258 | 3.055311907  | 0.013006574 | 0.013006574 | -2.65712505  |
| 1426844_a_at | 0.248662673  | 7.181534677 | 3.055288406  | 0.013007079 | 0.013007079 | -2.657156035 |
| 1457001_at   | -0.496114872 | 4.519417616 | -3.053333658 | 0.013049209 | 0.013049209 | -2.659733492 |
| 1444524_at   | 0.22918733   | 6.038724113 | 3.052636056  | 0.013064279 | 0.013064279 | -2.660653409 |
| 1453951_a_at | -0.288346921 | 5.685237652 | -3.052590669 | 0.01306526  | 0.01306526  | -2.660713262 |
| 1438509_at   | -0.275459587 | 3.763945013 | -3.052419969 | 0.01306895  | 0.01306895  | -2.66093837  |
| 1447938_at   | 0.569197764  | 7.245614755 | 3.051860891  | 0.013081044 | 0.013081044 | -2.661675663 |
| 1448075_at   | -0.315615984 | 4.080196803 | -3.051595235 | 0.013086795 | 0.013086795 | -2.662026012 |
| 1433577_at   | 0.516423832  | 7.136415264 | 3.051129824  | 0.013096876 | 0.013096876 | -2.662639814 |
| 1457235_at   | 0.287502912  | 3.763232255 | 3.050654383  | 0.013107183 | 0.013107183 | -2.663266864 |
| 1442363_at   | -0.246270985 | 5.602549116 | -3.049425377 | 0.013133864 | 0.013133864 | -2.664887876 |
| 1441407_at   | 0.379732614  | 5.311825161 | 3.048951173  | 0.013144173 | 0.013144173 | -2.665513371 |
| 1445067_at   | -0.303057841 | 7.138159534 | -3.048829954 | 0.01314681  | 0.01314681  | -2.665673267 |
| 1419698_at   | 0.196255846  | 3.429966425 | 3.044666691  | 0.013237698 | 0.013237698 | -2.671165728 |
| 1438628_x_at | -0.321968831 | 6.285399847 | -3.042464115 | 0.013286043 | 0.013286043 | -2.674072165 |
| 1417461_at   | -1.657940447 | 8.495542799 | -3.042450082 | 0.013286352 | 0.013286352 | -2.674090684 |
| 1438272_at   | -0.294268028 | 5.528968518 | -3.041330476 | 0.013310996 | 0.013310996 | -2.675568248 |
| 1427267_at   | 0.488471587  | 6.78697857  | 3.040966195  | 0.013319024 | 0.013319024 | -2.67604902  |
| 1437561_at   | 0.180174392  | 4.069494234 | 3.039973483  | 0.013340928 | 0.013340928 | -2.67735925  |

|              |              |             |              |             |             |              |
|--------------|--------------|-------------|--------------|-------------|-------------|--------------|
| 1445503_at   | 0.201736359  | 4.63016747  | 3.037947777  | 0.01338574  | 0.01338574  | -2.680033153 |
| 1457074_at   | -0.222468581 | 7.637312869 | -3.037934664 | 0.01338603  | 0.01338603  | -2.680050463 |
| 1441546_at   | -0.205422589 | 7.730182393 | -3.03745849  | 0.013396586 | 0.013396586 | -2.680679061 |
| 1444890_at   | -0.266373658 | 6.784826723 | -3.037048846 | 0.013405674 | 0.013405674 | -2.681219851 |
| 1417187_at   | 0.305529679  | 5.776669888 | 3.03655414   | 0.013416658 | 0.013416658 | -2.681872952 |
| 1450819_at   | -0.263712518 | 4.176857882 | -3.035056035 | 0.013449976 | 0.013449976 | -2.683850862 |
| 1417896_at   | -0.443887847 | 5.699518558 | -3.032661781 | 0.0135034   | 0.0135034   | -2.687012357 |
| 1444213_at   | 0.198597838  | 4.318537045 | 3.030954848  | 0.013541621 | 0.013541621 | -2.689266597 |
| 1433615_at   | -0.250387081 | 5.478118627 | -3.030805711 | 0.013544966 | 0.013544966 | -2.689463564 |
| 1437126_at   | 0.232743039  | 8.269477415 | 3.030744403  | 0.013546341 | 0.013546341 | -2.689544536 |
| 1442175_at   | -0.23894033  | 8.324372637 | -3.029622752 | 0.013571525 | 0.013571525 | -2.691025994 |
| 1418608_at   | 0.351554861  | 5.377936752 | 3.028235354  | 0.013602743 | 0.013602743 | -2.692858604 |
| 1436575_at   | -0.447871876 | 5.670360566 | -3.027880865 | 0.013610731 | 0.013610731 | -2.693326874 |
| 1424647_at   | 0.399879806  | 7.326683137 | 3.026446434  | 0.013643104 | 0.013643104 | -2.695221836 |
| 1419225_at   | 0.693493599  | 6.558488421 | 3.025830693  | 0.013657024 | 0.013657024 | -2.69603532  |
| 1440397_at   | 0.678867024  | 4.052707289 | 3.025671666  | 0.013660622 | 0.013660622 | -2.696245424 |
| 1438002_at   | 0.278651117  | 4.471488331 | 3.025345533  | 0.013668003 | 0.013668003 | -2.696676312 |
| 1457627_x_at | -0.312848601 | 4.150971631 | -3.024787674 | 0.013680638 | 0.013680638 | -2.697413379 |
| 1420364_at   | 0.345475724  | 6.050461571 | 3.023495072  | 0.01370996  | 0.01370996  | -2.699121326 |
| 1420352_at   | -0.758113041 | 7.016135698 | -3.023476397 | 0.013710384 | 0.013710384 | -2.699146004 |
| 1425041_at   | -0.248528289 | 5.079220888 | -3.022696705 | 0.013728102 | 0.013728102 | -2.700176302 |
| 1450643_s_at | -0.275020534 | 7.289771493 | -3.020843738 | 0.013770305 | 0.013770305 | -2.702625065 |
| 1426150_at   | -0.227007731 | 4.147595961 | -3.02021529  | 0.013784649 | 0.013784649 | -2.703455651 |
| 1455393_at   | -0.212862346 | 4.732405872 | -3.019112472 | 0.013809856 | 0.013809856 | -2.70491327  |
| 1422945_a_at | 0.499674628  | 5.565526265 | 3.018939059  | 0.013813824 | 0.013813824 | -2.705142483 |
| 1458801_at   | 0.28877776   | 4.851315362 | 3.018648344  | 0.013820479 | 0.013820479 | -2.705526751 |
| 1457424_at   | 0.332204176  | 9.084693561 | 3.017792681  | 0.013840085 | 0.013840085 | -2.706657809 |
| 1452716_at   | 0.282817362  | 8.522371644 | 3.017052166  | 0.013857076 | 0.013857076 | -2.70763671  |
| 1456632_at   | 0.402835203  | 8.52737272  | 3.016492314  | 0.013869936 | 0.013869936 | -2.708376821 |
| 1450731_s_at | 0.294442411  | 7.773880611 | 3.013427224  | 0.013940557 | 0.013940557 | -2.712429287 |
| 1438885_at   | -0.218263314 | 3.73760991  | -3.01318455  | 0.013946164 | 0.013946164 | -2.712750171 |
| 1435436_at   | 0.196071474  | 9.473849384 | 3.013094654  | 0.013948241 | 0.013948241 | -2.712869039 |
| 1460070_at   | 0.258087831  | 5.749319179 | 3.012998007  | 0.013950475 | 0.013950475 | -2.712996836 |
| 1457317_at   | 0.317104065  | 4.908245826 | 3.012107216  | 0.013971084 | 0.013971084 | -2.714174771 |
| 1418538_at   | -0.295950147 | 9.686831735 | -3.011497805 | 0.0139852   | 0.0139852   | -2.714980664 |
| 1435790_at   | 0.332406672  | 4.44433457  | 3.011149976  | 0.013993264 | 0.013993264 | -2.715440652 |
| 1438083_at   | -0.308624132 | 6.215111595 | -3.009406605 | 0.014033752 | 0.014033752 | -2.717746337 |
| 1448260_at   | 0.954247144  | 7.417725208 | 3.008219561  | 0.014061389 | 0.014061389 | -2.719316407 |
| 1458279_at   | -0.239879232 | 7.030722834 | -3.007301237 | 0.014082807 | 0.014082807 | -2.720531131 |
| 1434416_a_at | 0.210249216  | 9.013475128 | 3.005802595  | 0.014117833 | 0.014117833 | -2.722513635 |
| 1439773_at   | 0.226419618  | 6.230458873 | 3.005277986  | 0.014130114 | 0.014130114 | -2.723207669 |
| 1455573_at   | 0.293358987  | 6.596312013 | 3.002226106  | 0.014201781 | 0.014201781 | -2.727245633 |
| 1453670_at   | -0.290502669 | 3.540264957 | -3.002217977 | 0.014201972 | 0.014201972 | -2.727256391 |
| 1425697_at   | 0.244919213  | 4.220164753 | 3.001407704  | 0.014221062 | 0.014221062 | -2.728328602 |
| 1428885_at   | -0.240587695 | 5.560592441 | -2.999376097 | 0.014269042 | 0.014269042 | -2.73101722  |
| 1424860_at   | 0.239378319  | 8.018835458 | 2.999362915  | 0.014269354 | 0.014269354 | -2.731034667 |
| 1419542_at   | -0.472865678 | 4.416854554 | -2.999227127 | 0.014272567 | 0.014272567 | -2.731214381 |
| 1455466_at   | -0.391971819 | 6.732804782 | -2.998275274 | 0.014295109 | 0.014295109 | -2.732474191 |
| 1442319_at   | 0.189535439  | 6.12279639  | 2.998003748  | 0.014301546 | 0.014301546 | -2.732833578 |
| 1449104_at   | -0.41988375  | 7.55031384  | -2.996705558 | 0.014332364 | 0.014332364 | -2.734551931 |
| 1456933_at   | 0.265628858  | 6.654609102 | 2.996140264  | 0.014345804 | 0.014345804 | -2.735300228 |
| 1416361_a_at | -0.317357781 | 7.458303169 | -2.9959671   | 0.014349924 | 0.014349924 | -2.735529455 |
| 1436969_at   | -0.208506402 | 3.47532396  | -2.995543575 | 0.014360005 | 0.014360005 | -2.736090113 |

|              |              |             |              |             |             |              |
|--------------|--------------|-------------|--------------|-------------|-------------|--------------|
| 1425615_a_at | -0.248308805 | 8.78530295  | -2.995261927 | 0.014366714 | 0.014366714 | -2.736462963 |
| 1440057_at   | -0.227949678 | 4.084758996 | -2.99449626  | 0.014384966 | 0.014384966 | -2.737476601 |
| 1420946_at   | 0.48151824   | 8.904231736 | 2.991869256  | 0.014447771 | 0.014447771 | -2.740954765 |
| 1426587_a_at | 0.233643194  | 9.266879905 | 2.990525981  | 0.014479993 | 0.014479993 | -2.74273349  |
| 1437872_at   | -0.23408309  | 4.966741234 | -2.990476577 | 0.01448118  | 0.01448118  | -2.742798911 |
| 1450939_at   | 0.263969392  | 5.970658926 | 2.989913958  | 0.014494699 | 0.014494699 | -2.743543962 |
| 1427746_x_at | -0.340509927 | 4.492793609 | -2.989733544 | 0.014499036 | 0.014499036 | -2.743782881 |
| 1459424_at   | 0.215406302  | 3.973320539 | 2.989715281  | 0.014499476 | 0.014499476 | -2.743807067 |
| 1457072_at   | 0.354552926  | 6.878518721 | 2.989351736  | 0.014508221 | 0.014508221 | -2.744288512 |
| 1428384_at   | -0.316634097 | 7.751120634 | -2.988297306 | 0.014533617 | 0.014533617 | -2.745684967 |
| 1427529_at   | -0.325454428 | 7.172494449 | -2.987981498 | 0.014541232 | 0.014541232 | -2.74610323  |
| 1438285_at   | -0.284351981 | 6.514358947 | -2.987848099 | 0.014544449 | 0.014544449 | -2.74627991  |
| 1424161_at   | 0.191928603  | 7.750195083 | 2.986638389  | 0.014573663 | 0.014573663 | -2.747882171 |
| 1441909_s_at | 0.233015424  | 3.387031902 | 2.986557891  | 0.014575609 | 0.014575609 | -2.747988794 |
| 1460650_at   | -0.189266627 | 4.974327205 | -2.984447636 | 0.014626721 | 0.014626721 | -2.750784129 |
| 1415834_at   | 0.4316214    | 9.229710792 | 2.984122796  | 0.014634605 | 0.014634605 | -2.751214459 |
| 1443682_at   | 0.353110459  | 4.625392948 | 2.983686829  | 0.014645193 | 0.014645193 | -2.751792018 |
| 1426932_at   | 0.24984982   | 8.046910841 | 2.983425377  | 0.014651547 | 0.014651547 | -2.752138391 |
| 1446130_at   | -0.985404421 | 6.108076714 | -2.98241047  | 0.014676237 | 0.014676237 | -2.753482997 |
| 1441131_at   | 0.206623124  | 7.870308594 | 2.982213828  | 0.014681025 | 0.014681025 | -2.753743528 |
| 1429138_at   | -0.333134463 | 7.188983675 | -2.982015397 | 0.014685859 | 0.014685859 | -2.754006434 |
| 1435564_at   | 0.330567424  | 6.617737698 | 2.979854228  | 0.014738611 | 0.014738611 | -2.756870024 |
| 1444188_at   | 0.293609555  | 6.081853649 | 2.979522816  | 0.014746718 | 0.014746718 | -2.757309185 |
| 1416644_a_at | -0.309356436 | 6.35243864  | -2.979321216 | 0.014751651 | 0.014751651 | -2.757576333 |
| 1451683_x_at | -0.382885882 | 4.544253656 | -2.978590257 | 0.014769553 | 0.014769553 | -2.758544987 |
| 1427994_at   | 0.250863518  | 5.16535458  | 2.977601097  | 0.014793814 | 0.014793814 | -2.759855872 |
| 1454360_at   | -0.197962674 | 4.544364596 | -2.97748432  | 0.014796681 | 0.014796681 | -2.760010636 |
| 1425978_at   | 0.217523718  | 4.36691417  | 2.97713888   | 0.014805165 | 0.014805165 | -2.760468452 |
| 1451528_at   | -0.316551052 | 4.64424674  | -2.976754841 | 0.014814603 | 0.014814603 | -2.760977436 |
| 1417318_at   | -0.318580675 | 6.728030405 | -2.976676448 | 0.01481653  | 0.01481653  | -2.761081335 |
| 1458776_at   | 0.190605596  | 4.313287702 | 2.97509322   | 0.014855507 | 0.014855507 | -2.763179793 |
| 1447099_at   | -0.202542246 | 4.709721919 | -2.974680123 | 0.014865695 | 0.014865695 | -2.763727357 |
| 1438757_at   | 0.264481799  | 4.950198866 | 2.974514501  | 0.014869781 | 0.014869781 | -2.763946895 |
| 1442806_at   | -0.21689778  | 5.479634234 | -2.972317569 | 0.014924094 | 0.014924094 | -2.766859213 |
| 1428984_a_at | -0.665793671 | 5.387042592 | -2.972085886 | 0.014929834 | 0.014929834 | -2.76716636  |
| 1456536_at   | 0.300437768  | 5.430794084 | 2.971564451  | 0.014942759 | 0.014942759 | -2.767857657 |
| 1422727_at   | -0.605666511 | 7.721727924 | -2.971304344 | 0.014949211 | 0.014949211 | -2.768202504 |
| 1443105_at   | -0.31670202  | 4.229633011 | -2.971228104 | 0.014951103 | 0.014951103 | -2.768303583 |
| 1421402_at   | 0.269931093  | 6.956227401 | 2.971032237  | 0.014955964 | 0.014955964 | -2.768563265 |
| 1447547_at   | 0.37350835   | 4.111853497 | 2.970664724  | 0.01496509  | 0.01496509  | -2.769050528 |
| 1419567_at   | -0.314676398 | 5.169714668 | -2.970186445 | 0.014976974 | 0.014976974 | -2.769684663 |
| 1440848_at   | -0.250797284 | 4.739763779 | -2.969564231 | 0.014992449 | 0.014992449 | -2.770509664 |
| 1417588_at   | -0.332227485 | 5.593758171 | -2.968740985 | 0.015012949 | 0.015012949 | -2.771601264 |
| 1456821_at   | 0.215054274  | 4.144994544 | 2.968044499  | 0.015030315 | 0.015030315 | -2.772524828 |
| 1456652_at   | 0.448852355  | 6.915937604 | 2.967930379  | 0.015033163 | 0.015033163 | -2.772676158 |
| 1429918_at   | -0.337798418 | 6.559379206 | -2.967623591 | 0.01504082  | 0.01504082  | -2.773082984 |
| 1433868_at   | -0.23549306  | 9.299788562 | -2.967551185 | 0.015042628 | 0.015042628 | -2.773179    |
| 1446562_at   | -0.247129932 | 4.081791408 | -2.967249237 | 0.015050169 | 0.015050169 | -2.773579417 |
| 1422703_at   | 0.264951982  | 5.826235588 | 2.966455784  | 0.015070005 | 0.015070005 | -2.774631658 |
| 1457126_at   | -0.259159818 | 5.56548856  | -2.966352776 | 0.015072582 | 0.015072582 | -2.774768266 |
| 1445819_at   | 0.370585593  | 4.558445107 | 2.965539426  | 0.015092946 | 0.015092946 | -2.775846952 |
| 1421355_at   | -0.226241555 | 5.120204219 | -2.96532222  | 0.015098389 | 0.015098389 | -2.776135025 |
| 1436785_a_at | -0.356739552 | 6.791005467 | -2.965314549 | 0.015098581 | 0.015098581 | -2.776145199 |

|              |              |             |              |             |             |              |
|--------------|--------------|-------------|--------------|-------------|-------------|--------------|
| 1449099_at   | -0.253405343 | 9.061933355 | -2.960024562 | 0.015231766 | 0.015231766 | -2.783162283 |
| 1422561_at   | -0.380924739 | 7.634239047 | -2.95894396  | 0.01525912  | 0.01525912  | -2.784595954 |
| 1420075_at   | -0.212376038 | 5.033023352 | -2.958692225 | 0.015265499 | 0.015265499 | -2.784929953 |
| 1443252_at   | -0.370488136 | 6.961410203 | -2.956852831 | 0.015312195 | 0.015312195 | -2.787370584 |
| 1451532_s_at | -0.25875168  | 6.047789703 | -2.955443924 | 0.015348062 | 0.015348062 | -2.789240194 |
| 1445707_at   | 0.308325344  | 3.958044612 | 2.955431156  | 0.015348387 | 0.015348387 | -2.789257137 |
| 1420456_at   | -0.247064113 | 5.026083422 | -2.954642054 | 0.015368513 | 0.015368513 | -2.790304338 |
| 1417462_at   | -1.90775636  | 7.488043178 | -2.954190252 | 0.015380048 | 0.015380048 | -2.790903938 |
| 1416123_at   | 0.474093278  | 8.382830924 | 2.953254091  | 0.015403978 | 0.015403978 | -2.792146392 |
| 1432965_at   | -0.261235283 | 4.395645045 | -2.952759067 | 0.015416647 | 0.015416647 | -2.792803405 |
| 1434422_at   | -0.272863161 | 8.099791207 | -2.951624026 | 0.015445736 | 0.015445736 | -2.794309944 |
| 1443479_at   | -0.286746077 | 3.875936659 | -2.951217231 | 0.015456175 | 0.015456175 | -2.794849906 |
| 1447357_at   | 0.231304408  | 4.956036886 | 2.950450177  | 0.015475878 | 0.015475878 | -2.795868096 |
| 1455044_at   | 0.192323205  | 7.170020359 | 2.948219985  | 0.015533311 | 0.015533311 | -2.798828713 |
| 1450549_s_at | -0.291904478 | 4.649486136 | -2.948103875 | 0.015536307 | 0.015536307 | -2.798982862 |
| 1444704_at   | -0.216612318 | 4.892022886 | -2.946904087 | 0.0155673   | 0.0155673   | -2.800575767 |
| 1418269_at   | -0.205697668 | 7.986108159 | -2.946722309 | 0.015572002 | 0.015572002 | -2.800817116 |
| 1450906_at   | 0.310084106  | 4.429357617 | 2.946168262  | 0.01558634  | 0.01558634  | -2.801552745 |
| 1443119_at   | -0.449925233 | 6.058513619 | -2.946047416 | 0.015589469 | 0.015589469 | -2.801713199 |
| 1421440_at   | -0.323717658 | 4.035819107 | -2.945422184 | 0.015605669 | 0.015605669 | -2.802543377 |
| 1430375_a_at | 0.43401971   | 7.961548272 | 2.944408553  | 0.015631968 | 0.015631968 | -2.803889329 |
| 1448162_at   | -0.252861688 | 8.79467111  | -2.943914231 | 0.015644811 | 0.015644811 | -2.804545743 |
| 1456288_at   | 0.211313997  | 3.992948188 | 2.943786451  | 0.015648132 | 0.015648132 | -2.804715426 |
| 1447952_at   | 0.242962607  | 5.65416571  | 2.943161124  | 0.015664396 | 0.015664396 | -2.805545835 |
| 1419616_at   | 0.223767518  | 6.77499865  | 2.942496311  | 0.015681707 | 0.015681707 | -2.806428714 |
| 1452421_at   | -0.225983972 | 5.233935961 | -2.941778839 | 0.01570041  | 0.01570041  | -2.80738156  |
| 1450397_at   | 0.5395571    | 9.22356313  | 2.940445211  | 0.015735236 | 0.015735236 | -2.809152802 |
| 1445711_at   | 0.29051523   | 3.567117074 | 2.939955203  | 0.015748052 | 0.015748052 | -2.809803633 |
| 1431120_a_at | 0.297763006  | 5.310607935 | 2.939620935  | 0.015756801 | 0.015756801 | -2.810247621 |
| 1425682_a_at | 0.197433333  | 8.29759577  | 2.939132369  | 0.015769597 | 0.015769597 | -2.810896567 |
| 1420667_at   | 0.26291614   | 7.247360793 | 2.939125428  | 0.015769779 | 0.015769779 | -2.810905786 |
| 1421637_at   | -0.20179012  | 3.86078549  | -2.938432208 | 0.015787953 | 0.015787953 | -2.811826599 |
| 1459897_a_at | 0.546666577  | 7.414891469 | 2.937864159  | 0.015802862 | 0.015802862 | -2.812581172 |
| 1460591_at   | -0.267619841 | 4.441019074 | -2.937799466 | 0.01580456  | 0.01580456  | -2.812667109 |
| 1441367_a_at | -0.21088648  | 4.007916389 | -2.936541325 | 0.015837636 | 0.015837636 | -2.814338462 |
| 1434990_at   | -0.297758028 | 6.873680974 | -2.935541897 | 0.01586396  | 0.01586396  | -2.815666218 |
| 1425503_at   | 0.317592098  | 5.746279686 | 2.934033164  | 0.015903783 | 0.015903783 | -2.817670731 |
| 1445329_at   | 0.221900229  | 7.32310306  | 2.933074854  | 0.015929131 | 0.015929131 | -2.818944035 |
| 1450584_at   | -0.271024832 | 3.849747803 | -2.930785227 | 0.01598986  | 0.01598986  | -2.821986531 |
| 1418870_at   | -0.350948593 | 5.530207374 | -2.930088203 | 0.016008394 | 0.016008394 | -2.822912823 |
| 1418825_at   | 0.221585464  | 6.802780137 | 2.929553569  | 0.016022625 | 0.016022625 | -2.823623336 |
| 1453558_at   | -0.375394215 | 4.633055216 | -2.929462539 | 0.016025049 | 0.016025049 | -2.823744315 |
| 1428711_at   | 0.191516141  | 6.112067341 | 2.929223461  | 0.016031418 | 0.016031418 | -2.824062051 |
| 1428768_at   | 0.257048063  | 8.151192172 | 2.928824535  | 0.016042052 | 0.016042052 | -2.824592234 |
| 1433665_at   | 0.207805187  | 8.914138609 | 2.927971879  | 0.016064803 | 0.016064803 | -2.825725477 |
| 1416322_at   | -0.232831364 | 5.56699734  | -2.927768916 | 0.016070223 | 0.016070223 | -2.825995238 |
| 1445590_at   | -0.189518026 | 3.967917637 | -2.927763246 | 0.016070375 | 0.016070375 | -2.826002774 |
| 1422706_at   | 0.251729198  | 8.215552332 | 2.927672572  | 0.016072797 | 0.016072797 | -2.82612329  |
| 1443091_at   | 0.21644972   | 4.669344471 | 2.927059403  | 0.016089186 | 0.016089186 | -2.826938283 |
| 1430282_at   | -0.201817422 | 4.499698201 | -2.926188303 | 0.0161125   | 0.0161125   | -2.828096152 |
| 1425992_at   | -0.216683947 | 4.145311643 | -2.926009848 | 0.01611728  | 0.01611728  | -2.828333361 |
| 1430620_at   | -0.222412764 | 5.193140896 | -2.925817669 | 0.016122429 | 0.016122429 | -2.828588815 |
| 1442125_at   | 0.228122233  | 5.978104515 | 2.925657972  | 0.01612671  | 0.01612671  | -2.828801095 |



|              |              |             |              |             |             |              |
|--------------|--------------|-------------|--------------|-------------|-------------|--------------|
| 1419560_at   | -0.366263605 | 4.607367052 | -2.923134079 | 0.016194512 | 0.016194512 | -2.832156263 |
| 1425109_at   | -0.323003346 | 4.050004265 | -2.923046683 | 0.016196865 | 0.016196865 | -2.832272453 |
| 1434634_at   | -0.443756881 | 6.340497056 | -2.921170813 | 0.016247455 | 0.016247455 | -2.83476647  |
| 1443511_at   | 0.332748966  | 7.271478201 | 2.918907373  | 0.016308711 | 0.016308711 | -2.837776105 |
| 1422493_at   | -0.1904053   | 7.144369314 | -2.917044993 | 0.016359289 | 0.016359289 | -2.840252734 |
| 1419064_a_at | 0.245449544  | 4.368540514 | 2.916805219  | 0.016365813 | 0.016365813 | -2.840571608 |
| 1437333_x_at | -0.213979476 | 7.389483381 | -2.915662579 | 0.016396936 | 0.016396936 | -2.842091252 |
| 1439549_at   | 0.190943074  | 8.467862573 | 2.91512393   | 0.016411629 | 0.016411629 | -2.842807656 |
| 1447493_at   | 0.343573508  | 4.869027174 | 2.913698067  | 0.016450587 | 0.016450587 | -2.844704153 |
| 1425681_a_at | 0.292831735  | 7.041502631 | 2.912568794  | 0.016481509 | 0.016481509 | -2.846206264 |
| 1419526_at   | 0.250781749  | 5.106154675 | 2.911530174  | 0.01651     | 0.01651     | -2.847587871 |
| 1418876_at   | 0.31140097   | 8.445977972 | 2.911362709  | 0.016514599 | 0.016514599 | -2.847810647 |
| 1418043_at   | 0.228059708  | 4.532347487 | 2.911175713  | 0.016519735 | 0.016519735 | -2.848059405 |
| 1426070_a_at | -0.240610122 | 4.166521555 | -2.911119505 | 0.016521279 | 0.016521279 | -2.848134179 |
| 1459406_at   | 0.220918862  | 5.952262276 | 2.91023374   | 0.016545634 | 0.016545634 | -2.849312537 |
| 1431792_a_at | 0.339479519  | 7.021286798 | 2.909935621  | 0.01655384  | 0.01655384  | -2.849709146 |
| 1417160_s_at | -0.215484203 | 4.924967213 | -2.909602073 | 0.016563025 | 0.016563025 | -2.850152896 |
| 1445501_at   | -0.339302339 | 3.987434354 | -2.908600447 | 0.016590639 | 0.016590639 | -2.851485496 |
| 1429479_at   | 0.25674539   | 6.92470783  | 2.908371223  | 0.016596965 | 0.016596965 | -2.851790475 |
| 1435245_at   | 0.267520003  | 4.955250133 | 2.907698544  | 0.016615544 | 0.016615544 | -2.852685481 |
| 1429065_at   | -0.206280236 | 9.267862786 | -2.907345538 | 0.016625302 | 0.016625302 | -2.853155172 |
| 1422827_x_at | -0.195749634 | 7.436395662 | -2.907111391 | 0.016631778 | 0.016631778 | -2.85346672  |
| 1460056_at   | -0.263683556 | 4.179509931 | -2.906060732 | 0.016660868 | 0.016660868 | -2.854864738 |
| 1441101_at   | 0.284191276  | 4.231632048 | 2.90586633   | 0.016666256 | 0.016666256 | -2.855123419 |
| 1439632_at   | 0.198724258  | 6.576786747 | 2.904634179  | 0.016700448 | 0.016700448 | -2.856763045 |
| 1427257_at   | 0.185346681  | 10.15654862 | 2.903545187  | 0.016730727 | 0.016730727 | -2.858212255 |
| 1444564_at   | 0.313394184  | 4.466856741 | 2.902759397  | 0.01675261  | 0.01675261  | -2.859258018 |
| 1423530_at   | 0.23077692   | 4.272101124 | 2.900692228  | 0.016810317 | 0.016810317 | -2.862009298 |
| 1434203_at   | -0.216443632 | 5.530119945 | -2.900236002 | 0.016823081 | 0.016823081 | -2.862616547 |
| 1448433_a_at | -0.261479738 | 9.939293182 | -2.899535258 | 0.016842704 | 0.016842704 | -2.863549283 |
| 1450754_at   | 0.342831129  | 6.796799861 | 2.899367886  | 0.016847394 | 0.016847394 | -2.86377207  |
| 1447287_at   | -0.225542956 | 3.736498303 | -2.89916691  | 0.016853028 | 0.016853028 | -2.86403959  |
| 1420914_at   | 0.238884777  | 4.567388881 | 2.898606535  | 0.016868747 | 0.016868747 | -2.864785523 |
| 1441899_x_at | -0.248623889 | 5.327438593 | -2.897054719 | 0.016912354 | 0.016912354 | -2.866851304 |
| 1457733_at   | -0.199567319 | 3.423624993 | -2.896784651 | 0.016919955 | 0.016919955 | -2.867210836 |
| 1460045_at   | -0.306250088 | 4.294534589 | -2.896444411 | 0.016929535 | 0.016929535 | -2.867663791 |
| 1429212_a_at | -0.519426216 | 6.134153729 | -2.895951506 | 0.016943425 | 0.016943425 | -2.868320001 |
| 1448977_at   | 0.526279621  | 6.021931696 | 2.895573241  | 0.016954092 | 0.016954092 | -2.868823601 |
| 1429032_at   | -0.261488439 | 5.018581258 | -2.895308935 | 0.016961549 | 0.016961549 | -2.869175487 |
| 1440710_at   | -0.240567365 | 4.311401407 | -2.894450482 | 0.016985793 | 0.016985793 | -2.870318431 |
| 1417658_at   | -0.334186977 | 5.649229969 | -2.893687907 | 0.017007359 | 0.017007359 | -2.871333763 |
| 1441886_at   | -0.214928152 | 3.723349272 | -2.891311343 | 0.017074748 | 0.017074748 | -2.874498288 |
| 1421614_at   | -0.305966833 | 5.697742801 | -2.891047276 | 0.017082253 | 0.017082253 | -2.874849932 |
| 1419661_at   | 0.260169613  | 5.586057252 | 2.890466879  | 0.017098759 | 0.017098759 | -2.875622829 |
| 1445975_at   | -0.197315494 | 3.846064789 | -2.889412211 | 0.017128794 | 0.017128794 | -2.877027355 |
| 1460327_at   | -0.194921344 | 6.715593985 | -2.889379343 | 0.017129731 | 0.017129731 | -2.877071126 |
| 1418535_at   | -0.491886462 | 5.213367702 | -2.889375878 | 0.01712983  | 0.01712983  | -2.877075742 |
| 1441524_at   | -0.216227023 | 4.137409765 | -2.889087271 | 0.017138059 | 0.017138059 | -2.8774601   |
| 1427683_at   | 0.49478914   | 5.213447899 | 2.888108131  | 0.017166007 | 0.017166007 | -2.878764129 |
| 1441690_at   | -0.200817207 | 3.339524948 | -2.887910749 | 0.017171647 | 0.017171647 | -2.879027012 |
| 1418860_a_at | -0.19141318  | 6.779189433 | -2.887123175 | 0.017194168 | 0.017194168 | -2.880075966 |
| 1427665_a_at | 0.402687272  | 5.869359537 | 2.887079804  | 0.01719541  | 0.01719541  | -2.880133732 |
| 1419709_at   | 0.270916839  | 4.193042966 | 2.887033195  | 0.017196743 | 0.017196743 | -2.880195811 |

|              |              |             |              |             |             |              |
|--------------|--------------|-------------|--------------|-------------|-------------|--------------|
| 1459455_at   | -0.301120023 | 4.246269878 | -2.886810914 | 0.017203106 | 0.017203106 | -2.880491872 |
| 1420559_a_at | -0.27085495  | 8.280664398 | -2.886032303 | 0.017225413 | 0.017225413 | -2.881528943 |
| 1444698_at   | 0.232041397  | 4.614283564 | 2.885927751  | 0.01722841  | 0.01722841  | -2.881668205 |
| 1429872_at   | -0.213570708 | 5.032042156 | -2.885692176 | 0.017235166 | 0.017235166 | -2.881981988 |
| 1436006_at   | -0.294042116 | 6.083288048 | -2.883666175 | 0.01729338  | 0.01729338  | -2.884680751 |
| 1425351_at   | 0.300533745  | 4.616423185 | 2.88101771   | 0.017369782 | 0.017369782 | -2.888209072 |
| 1437670_x_at | 0.200056188  | 9.302750271 | 2.880944402  | 0.017371902 | 0.017371902 | -2.888306741 |
| 1454125_a_at | -0.300867592 | 4.902203545 | -2.88031932  | 0.017389986 | 0.017389986 | -2.889139551 |
| 1448925_at   | 0.359175279  | 8.738162567 | 2.880204751  | 0.017393303 | 0.017393303 | -2.889292197 |
| 1458045_at   | 0.44645461   | 7.106622675 | 2.879506543  | 0.01741353  | 0.01741353  | -2.89022247  |
| 1437201_at   | 0.283772453  | 6.61865041  | 2.878686788  | 0.017437308 | 0.017437308 | -2.891314727 |
| 1427477_at   | 0.199944592  | 4.920342826 | 2.878570279  | 0.01744069  | 0.01744069  | -2.891469969 |
| 1422779_at   | -0.508470526 | 8.375106268 | -2.878383948 | 0.0174461   | 0.0174461   | -2.891718247 |
| 1438975_x_at | -0.494631342 | 7.274072773 | -2.877700345 | 0.017465965 | 0.017465965 | -2.89262914  |
| 1434565_at   | -0.179251042 | 7.312054885 | -2.87706854  | 0.017484344 | 0.017484344 | -2.893471037 |
| 1436473_at   | 0.321398619  | 7.009733335 | 2.87685223   | 0.017490642 | 0.017490642 | -2.893759281 |
| 1422807_at   | -0.507731027 | 8.186319916 | -2.87654401  | 0.017499618 | 0.017499618 | -2.894170007 |
| 1453462_at   | -0.420055209 | 6.326090052 | -2.875834128 | 0.017520311 | 0.017520311 | -2.895115998 |
| 1454198_a_at | -0.506628914 | 6.983057265 | -2.873965027 | 0.017574914 | 0.017574914 | -2.897606917 |
| 1453305_at   | -0.214596124 | 5.147767639 | -2.873877162 | 0.017577485 | 0.017577485 | -2.897724018 |
| 1456689_at   | -0.376842287 | 5.393912674 | -2.87360355  | 0.017585494 | 0.017585494 | -2.898088676 |
| 1423537_at   | 0.493587451  | 9.018675877 | 2.872926561  | 0.017605326 | 0.017605326 | -2.898990956 |
| 1416468_at   | -0.549242003 | 8.955010334 | -2.87285639  | 0.017607383 | 0.017607383 | -2.899084481 |
| 1455641_at   | -0.224464876 | 3.663814519 | -2.872452254 | 0.017619234 | 0.017619234 | -2.899623122 |
| 1458989_at   | -0.393790356 | 4.689264797 | -2.872154368 | 0.017627974 | 0.017627974 | -2.900020158 |
| 1447254_at   | 0.208847881  | 3.624742131 | 2.870500281  | 0.017676589 | 0.017676589 | -2.902224899 |
| 1459396_at   | -0.281841766 | 5.303942549 | -2.86976897  | 0.017698126 | 0.017698126 | -2.90319972  |
| 1449109_at   | 0.212657986  | 9.996424231 | 2.869739798  | 0.017698986 | 0.017698986 | -2.903238607 |
| 1417025_at   | 0.30997157   | 5.96820596  | 2.869354247  | 0.017710351 | 0.017710351 | -2.903752552 |
| 1424724_a_at | 0.18943147   | 7.440831746 | 2.868167734  | 0.017745375 | 0.017745375 | -2.905334247 |
| 1443654_at   | 0.2923779    | 5.440612823 | 2.8681099    | 0.017747084 | 0.017747084 | -2.905411346 |
| 1460464_at   | 0.471484391  | 6.677478019 | 2.867914481  | 0.01775286  | 0.01775286  | -2.905671861 |
| 1425848_a_at | 0.398397077  | 5.042695036 | 2.867473323  | 0.017765906 | 0.017765906 | -2.906259981 |
| 1454217_at   | -0.272362682 | 3.722608307 | -2.866679873 | 0.017789394 | 0.017789394 | -2.907317781 |
| 1415835_at   | -0.248946271 | 3.393464059 | -2.866676591 | 0.017789491 | 0.017789491 | -2.907322156 |
| 1421063_s_at | 0.447534989  | 7.426088892 | 2.866340854  | 0.01779944  | 0.01779944  | -2.90776976  |
| 1421326_at   | 0.257182292  | 5.115388019 | 2.866068407  | 0.017807517 | 0.017807517 | -2.908132992 |
| 1434847_at   | -0.244138137 | 5.586065585 | -2.865610465 | 0.017821102 | 0.017821102 | -2.908743539 |
| 1420789_at   | 0.179414046  | 3.844977981 | 2.865498068  | 0.017824437 | 0.017824437 | -2.908893392 |
| 1423640_at   | -0.312830138 | 4.489617109 | -2.865217082 | 0.01783278  | 0.01783278  | -2.909268023 |
| 1453956_a_at | 0.246811911  | 5.96804065  | 2.865177353  | 0.017833959 | 0.017833959 | -2.909320993 |
| 1427707_a_at | -0.215850211 | 7.673903736 | -2.864636523 | 0.017850028 | 0.017850028 | -2.91004208  |
| 1423788_at   | 0.277042521  | 4.396695851 | 2.864188146  | 0.017863362 | 0.017863362 | -2.910639912 |
| 1450730_at   | 0.223501798  | 8.200485314 | 2.864112496  | 0.017865612 | 0.017865612 | -2.91074078  |
| 1435227_at   | 0.243465781  | 9.430395803 | 2.8639499    | 0.01787045  | 0.01787045  | -2.910957577 |
| 1448756_at   | 0.772738024  | 5.275433833 | 2.86274575   | 0.017906322 | 0.017906322 | -2.912563179 |
| 1441029_at   | -0.194920448 | 5.898727087 | -2.861935411 | 0.017930503 | 0.017930503 | -2.913643727 |
| 1417354_at   | -0.207515052 | 7.680970025 | -2.860987437 | 0.017958834 | 0.017958834 | -2.914907855 |
| 1425597_a_at | -0.432754363 | 5.524071376 | -2.860723871 | 0.017966719 | 0.017966719 | -2.91525933  |
| 1455923_at   | -0.388191554 | 4.589781993 | -2.859505881 | 0.018003202 | 0.018003202 | -2.916883621 |
| 1420903_at   | 0.182666175  | 7.579456171 | 2.856777094  | 0.018085213 | 0.018085213 | -2.920523009 |
| 1458985_at   | -0.259920454 | 5.011841555 | -2.856088091 | 0.01810598  | 0.01810598  | -2.921442001 |
| 1431800_at   | -0.178458886 | 3.785359487 | -2.855489488 | 0.018124042 | 0.018124042 | -2.922240442 |

|              |              |             |              |             |             |              |
|--------------|--------------|-------------|--------------|-------------|-------------|--------------|
| 1447334_at   | 0.638292104  | 6.234949207 | 2.854121746  | 0.01816538  | 0.01816538  | -2.924064868 |
| 1436230_at   | -0.227185967 | 4.988115262 | -2.853989829 | 0.018169372 | 0.018169372 | -2.924240838 |
| 1422530_at   | 1.22222658   | 7.508945486 | 2.852633394  | 0.018210473 | 0.018210473 | -2.926050301 |
| 1449277_at   | 0.426505379  | 5.533144486 | 2.852466879  | 0.018215525 | 0.018215525 | -2.926272437 |
| 1427574_s_at | 0.251348695  | 6.104375833 | 2.851886139  | 0.018233155 | 0.018233155 | -2.927047174 |
| 1438122_at   | -0.672046075 | 6.255237358 | -2.850650272 | 0.018270732 | 0.018270732 | -2.928695947 |
| 1422751_at   | 0.283093469  | 8.545239008 | 2.850580835  | 0.018272846 | 0.018272846 | -2.928788586 |
| 1447894_x_at | 0.441271787  | 7.001097911 | 2.85045393   | 0.018276709 | 0.018276709 | -2.928957895 |
| 1420137_at   | -0.202081552 | 3.632211726 | -2.849258924 | 0.018313131 | 0.018313131 | -2.930552253 |
| 1453839_a_at | -0.257131012 | 4.899095501 | -2.849134418 | 0.01831693  | 0.01831693  | -2.930718372 |
| 1450856_at   | 0.245202199  | 4.922197441 | 2.849068253  | 0.018318949 | 0.018318949 | -2.93080665  |
| 1442438_at   | -0.246711609 | 4.393857306 | -2.847082064 | 0.018379667 | 0.018379667 | -2.933456795 |
| 1442819_at   | -0.548039462 | 6.325913001 | -2.846650665 | 0.018392882 | 0.018392882 | -2.934032434 |
| 1436119_at   | -0.224764652 | 7.392877301 | -2.846090138 | 0.018410066 | 0.018410066 | -2.934780393 |
| 1448594_at   | -0.225196779 | 9.071626573 | -2.845957141 | 0.018414146 | 0.018414146 | -2.934957864 |
| 1455277_at   | -0.25507333  | 8.002439792 | -2.845847264 | 0.018417518 | 0.018417518 | -2.935104485 |
| 1424976_at   | 0.365019929  | 5.767154731 | 2.844362836  | 0.018463125 | 0.018463125 | -2.937085387 |
| 1421462_a_at | -0.263234185 | 9.4032543   | -2.844149503 | 0.018469689 | 0.018469689 | -2.93737008  |
| 1454608_x_at | -0.441790544 | 3.971959512 | -2.843548193 | 0.018488203 | 0.018488203 | -2.938172543 |
| 1426166_at   | -0.403727667 | 4.815265498 | -2.8432452   | 0.018497539 | 0.018497539 | -2.938576904 |
| 1437324_x_at | -0.254354563 | 6.900791005 | -2.842713759 | 0.018513926 | 0.018513926 | -2.939286151 |
| 1427146_at   | 0.192005685  | 6.705270048 | 2.841602737  | 0.018548232 | 0.018548232 | -2.940768944 |
| 1438482_at   | -0.316675228 | 7.829001376 | -2.840626228 | 0.018578437 | 0.018578437 | -2.942072269 |
| 1441979_at   | -0.504730053 | 3.939566803 | -2.840292514 | 0.018588771 | 0.018588771 | -2.942517682 |
| 1418037_at   | 0.173912328  | 3.732985375 | 2.84002313   | 0.018597117 | 0.018597117 | -2.942877237 |
| 1456733_x_at | -0.245643345 | 12.307153   | -2.839254041 | 0.018620966 | 0.018620966 | -2.943903787 |
| 1449545_at   | 0.296299364  | 6.929889381 | 2.838637483  | 0.018640108 | 0.018640108 | -2.944726768 |
| 1457032_at   | -0.271080099 | 6.223057362 | -2.83760586  | 0.01867218  | 0.01867218  | -2.946103825 |
| 1421285_at   | -0.233076515 | 5.270100437 | -2.837544385 | 0.018674093 | 0.018674093 | -2.946185886 |
| 1451846_at   | 0.345523031  | 4.108889927 | 2.837515866  | 0.01867498  | 0.01867498  | -2.946223956 |
| 1430490_at   | 0.200951998  | 4.640301872 | 2.837298789  | 0.018681737 | 0.018681737 | -2.946513728 |
| 1424756_at   | 0.598132236  | 7.244371858 | 2.836872743  | 0.018695006 | 0.018695006 | -2.947082458 |
| 1446810_at   | -0.299364185 | 5.658593877 | -2.836649425 | 0.018701965 | 0.018701965 | -2.94738057  |
| 1433858_at   | 0.269860913  | 7.327361874 | 2.835519536  | 0.018737213 | 0.018737213 | -2.948888922 |
| 1419358_at   | -0.229008719 | 8.289471164 | -2.83548906  | 0.018738165 | 0.018738165 | -2.948929607 |
| 1445884_at   | -0.276249216 | 7.660774328 | -2.835404001 | 0.018740821 | 0.018740821 | -2.949043159 |
| 1444665_at   | 0.210571236  | 5.537771011 | 2.835032203  | 0.018752437 | 0.018752437 | -2.949539512 |
| 1435876_at   | -0.204786448 | 3.102604107 | -2.834577697 | 0.018766647 | 0.018766647 | -2.950146289 |
| 1443593_at   | -0.196341077 | 7.417703452 | -2.834410425 | 0.018771879 | 0.018771879 | -2.950369605 |
| 1415951_at   | -0.266970348 | 9.921308712 | -2.833213825 | 0.018809352 | 0.018809352 | -2.951967162 |
| 1439383_x_at | -0.198935236 | 4.739182652 | -2.833138105 | 0.018811726 | 0.018811726 | -2.952068257 |
| 1428404_at   | 0.225019327  | 6.772039343 | 2.832991157  | 0.018816334 | 0.018816334 | -2.95226445  |
| 1430700_a_at | 0.58276203   | 7.081169062 | 2.832568733  | 0.018829586 | 0.018829586 | -2.952828443 |
| 1426243_at   | 0.254404114  | 6.992641044 | 2.830845149  | 0.018883755 | 0.018883755 | -2.955129762 |
| 1438146_x_at | -0.2605167   | 3.440910244 | -2.830417398 | 0.018897223 | 0.018897223 | -2.955700917 |
| 1440087_at   | 0.331320243  | 4.455371836 | 2.829480494  | 0.018926756 | 0.018926756 | -2.956951954 |
| 1422437_at   | -0.18600285  | 12.73320224 | -2.828712754 | 0.018950991 | 0.018950991 | -2.957977143 |
| 1439194_at   | -0.447020951 | 5.240470756 | -2.828431479 | 0.018959878 | 0.018959878 | -2.958352747 |
| 1438370_x_at | 0.23677469   | 7.857129633 | 2.828172582  | 0.018968062 | 0.018968062 | -2.958698471 |
| 1432413_at   | 0.287946656  | 4.753996888 | 2.825917339  | 0.019039501 | 0.019039501 | -2.961710219 |
| 1448797_at   | 0.20164542   | 9.606521242 | 2.825505262  | 0.019052583 | 0.019052583 | -2.962260553 |
| 1438276_at   | 0.323996226  | 6.017484831 | 2.825242296  | 0.019060937 | 0.019060937 | -2.962611753 |
| 1456385_x_at | -0.257894977 | 5.117384377 | -2.825221866 | 0.019061586 | 0.019061586 | -2.962639037 |

|              |              |             |              |             |             |              |
|--------------|--------------|-------------|--------------|-------------|-------------|--------------|
| 1426295_at   | -0.538589269 | 5.530809554 | -2.824876103 | 0.019072576 | 0.019072576 | -2.96310082  |
| 1422201_at   | -0.262111099 | 4.627908698 | -2.823652816 | 0.019111508 | 0.019111508 | -2.964734629 |
| 1451425_a_at | 0.194102164  | 6.513964243 | 2.823189534  | 0.019126274 | 0.019126274 | -2.965353403 |
| 1444373_at   | 0.232284965  | 4.283315975 | 2.82174217   | 0.019172478 | 0.019172478 | -2.967286622 |
| 1450380_at   | 0.303228446  | 9.602286467 | 2.821457177  | 0.019181589 | 0.019181589 | -2.967667295 |
| 1448578_at   | 0.21010689   | 9.157687946 | 2.821244498  | 0.019188392 | 0.019188392 | -2.96795138  |
| 1457376_at   | -0.217687431 | 5.153403004 | -2.820319881 | 0.019217992 | 0.019217992 | -2.969186455 |
| 1453749_at   | -0.819046548 | 5.490384885 | -2.820253898 | 0.019220107 | 0.019220107 | -2.969274595 |
| 1445286_at   | 0.196922017  | 3.329252791 | 2.819845407  | 0.0192332   | 0.0192332   | -2.96982026  |
| 1434423_at   | 0.208728472  | 8.896674579 | 2.818081017  | 0.019289859 | 0.019289859 | -2.972177244 |
| 1452520_a_at | -0.232116495 | 3.740859803 | -2.817707505 | 0.019301876 | 0.019301876 | -2.972676226 |
| 1446493_at   | 0.192454402  | 3.808156405 | 2.817571443  | 0.019306255 | 0.019306255 | -2.972857995 |
| 1442646_at   | -0.264749476 | 3.948235025 | -2.815651166 | 0.019368166 | 0.019368166 | -2.975423453 |
| 1445534_at   | 0.284568405  | 7.858629361 | 2.81486724   | 0.019393498 | 0.019393498 | -2.976470818 |
| 1450655_at   | 0.182677423  | 9.584672477 | 2.81469324   | 0.019399125 | 0.019399125 | -2.976703296 |
| 1438031_at   | 0.246731392  | 7.29209406  | 2.81416143   | 0.019416334 | 0.019416334 | -2.977413843 |
| 1446294_at   | 0.200491479  | 7.24755916  | 2.813209176  | 0.019447188 | 0.019447188 | -2.97868618  |
| 1431024_a_at | 0.398184601  | 6.008462052 | 2.812959425  | 0.019455288 | 0.019455288 | -2.979019886 |
| 1416726_s_at | 0.270637943  | 11.03760125 | 2.81204793   | 0.01948488  | 0.01948488  | -2.980237816 |
| 1457757_at   | -0.21011387  | 4.289984215 | -2.809480908 | 0.019568464 | 0.019568464 | -2.983668068 |
| 1443198_at   | 0.178482243  | 4.304062742 | 2.809311407  | 0.019573996 | 0.019573996 | -2.983894579 |
| 1441103_at   | -0.296898949 | 4.901598879 | -2.808953889 | 0.019585669 | 0.019585669 | -2.984372351 |
| 1453376_at   | -0.208472115 | 4.001693264 | -2.808709475 | 0.019593653 | 0.019593653 | -2.984698979 |
| 1432103_a_at | 0.32298099   | 8.529250356 | 2.808630602  | 0.019596231 | 0.019596231 | -2.984804383 |
| 1425749_at   | -0.213760085 | 5.006429305 | -2.806281336 | 0.019673153 | 0.019673153 | -2.987944034 |
| 1421101_a_at | -0.192908451 | 9.218124759 | -2.805999298 | 0.019682409 | 0.019682409 | -2.988320979 |
| 1425878_at   | -0.212936681 | 3.814030297 | -2.803461393 | 0.019765892 | 0.019765892 | -2.99171307  |
| 1418157_at   | 0.320457228  | 10.36473887 | 2.802757078  | 0.019789123 | 0.019789123 | -2.992654492 |
| 1441252_at   | -0.200966435 | 3.918069847 | -2.800798577 | 0.019853869 | 0.019853869 | -2.995272445 |
| 1417482_at   | -0.200153009 | 4.112792577 | -2.799669867 | 0.019891281 | 0.019891281 | -2.996781289 |
| 1420080_a_at | -0.219896153 | 3.812019311 | -2.799545015 | 0.019895423 | 0.019895423 | -2.996948194 |
| 1416576_at   | 0.279086545  | 7.7179977   | 2.799335084  | 0.019902391 | 0.019902391 | -2.997228835 |
| 1438840_x_at | -0.320314016 | 4.380736392 | -2.799126776 | 0.019909307 | 0.019909307 | -2.997507308 |
| 1435934_at   | 0.179274195  | 7.110965182 | 2.798910413  | 0.019916493 | 0.019916493 | -2.997796552 |
| 1459269_at   | 0.178106738  | 6.115243896 | 2.798518922  | 0.019929503 | 0.019929503 | -2.99831992  |
| 1460065_at   | 0.215053613  | 3.614016921 | 2.797783456  | 0.019953966 | 0.019953966 | -2.999303152 |
| 1430933_at   | 0.28202028   | 4.281582563 | 2.797281831  | 0.019970668 | 0.019970668 | -2.999973782 |
| 1442495_at   | 0.29550634   | 5.728805519 | 2.796599834  | 0.0199934   | 0.0199934   | -3.000885572 |
| 1451160_s_at | -0.256198406 | 7.50874926  | -2.796442025 | 0.019998663 | 0.019998663 | -3.001096556 |
| 1453059_at   | -0.269546669 | 5.470792856 | -2.795561441 | 0.02002806  | 0.02002806  | -3.002273884 |
| 1424375_s_at | 0.347283377  | 7.899923546 | 2.795452324  | 0.020031705 | 0.020031705 | -3.002419774 |
| 1446482_at   | -0.221491302 | 3.505159627 | -2.794813582 | 0.02005306  | 0.02005306  | -3.003273788 |
| 1459706_at   | 0.232747467  | 4.175777902 | 2.793816797  | 0.020086431 | 0.020086431 | -3.004606552 |
| 1434288_at   | 0.274290645  | 8.257909466 | 2.79144115   | 0.02016619  | 0.02016619  | -3.007783126 |
| 1449086_at   | -0.277368586 | 6.396773884 | -2.7913631   | 0.020168816 | 0.020168816 | -3.007887494 |
| 1429058_at   | -0.3945033   | 10.79337412 | -2.78958057  | 0.020228881 | 0.020228881 | -3.010271161 |
| 1429781_s_at | -0.562073634 | 7.104955208 | -2.789580348 | 0.020228888 | 0.020228888 | -3.010271458 |
| 1453504_at   | 0.317725927  | 4.713993597 | 2.789478586  | 0.020232323 | 0.020232323 | -3.010407544 |
| 1420097_at   | -0.395798763 | 6.657391049 | -2.789298049 | 0.020238417 | 0.020238417 | -3.010648973 |
| 1435532_at   | 0.553483622  | 5.457130947 | 2.789101417  | 0.020245057 | 0.020245057 | -3.010911928 |
| 1450990_at   | -0.712902296 | 10.94852938 | -2.788360001 | 0.020270114 | 0.020270114 | -3.011903436 |
| 1453125_at   | 0.421456784  | 10.30061925 | 2.787589835  | 0.020296175 | 0.020296175 | -3.012933418 |
| 1459217_at   | -0.241212352 | 3.887739418 | -2.786028589 | 0.02034911  | 0.02034911  | -3.015021434 |

|              |              |             |              |             |             |              |
|--------------|--------------|-------------|--------------|-------------|-------------|--------------|
| 1451406_a_at | -0.237205923 | 8.077304681 | -2.785306539 | 0.020373639 | 0.020373639 | -3.015987143 |
| 1434721_at   | -0.272358597 | 8.622914847 | -2.783479061 | 0.020435854 | 0.020435854 | -3.018431412 |
| 1447609_at   | -0.20653602  | 4.688405416 | -2.783091893 | 0.020449059 | 0.020449059 | -3.018949273 |
| 1444722_at   | 0.206406031  | 7.431789448 | 2.782702083  | 0.020462363 | 0.020462363 | -3.019470673 |
| 1445514_at   | -0.264598376 | 5.578582833 | -2.782470018 | 0.020470288 | 0.020470288 | -3.01978108  |
| 1441106_at   | -0.22112745  | 4.610532125 | -2.782461958 | 0.020470563 | 0.020470563 | -3.019791861 |
| 1456951_at   | -0.212020309 | 4.089861838 | -2.782455017 | 0.0204708   | 0.0204708   | -3.019801146 |
| 1441425_at   | 0.357449774  | 5.775058089 | 2.782228426  | 0.020478541 | 0.020478541 | -3.020104233 |
| 1433972_at   | 0.253472323  | 7.454696337 | 2.782168405  | 0.020480592 | 0.020480592 | -3.020184518 |
| 1425786_a_at | -0.19828698  | 4.486134627 | -2.781898388 | 0.020489821 | 0.020489821 | -3.020545697 |
| 1426181_a_at | 0.301104567  | 4.406637127 | 2.780443732  | 0.020539614 | 0.020539614 | -3.022491518 |
| 1418374_at   | 0.262820647  | 8.881524594 | 2.780163373  | 0.020549224 | 0.020549224 | -3.022866551 |
| 1425852_at   | -0.191764468 | 5.742160292 | -2.779962198 | 0.020556123 | 0.020556123 | -3.023135663 |
| 1422745_at   | -0.206481806 | 5.465273072 | -2.779840252 | 0.020560307 | 0.020560307 | -3.02329879  |
| 1443237_at   | -0.223498945 | 4.100913038 | -2.778342801 | 0.020611744 | 0.020611744 | -3.025301991 |
| 1430955_at   | -0.324168053 | 6.494071544 | -2.777843859 | 0.020628912 | 0.020628912 | -3.025969467 |
| 1439304_at   | 0.313797837  | 6.20193721  | 2.777343652  | 0.020646137 | 0.020646137 | -3.026638646 |
| 1435670_at   | 0.995669621  | 8.078028609 | 2.776265001  | 0.020683333 | 0.020683333 | -3.028081705 |
| 1456495_s_at | -0.292708896 | 6.340809206 | -2.775819915 | 0.0206987   | 0.0206987   | -3.028677173 |
| 1440769_at   | 0.183305861  | 5.346362664 | 2.775257361  | 0.02071814  | 0.02071814  | -3.029429809 |
| 1429816_at   | -0.53394089  | 5.835160963 | -2.775050236 | 0.020725302 | 0.020725302 | -3.029706923 |
| 1431194_at   | -0.212378021 | 5.781361359 | -2.775017671 | 0.020726429 | 0.020726429 | -3.029750492 |
| 1450071_at   | 0.16698001   | 9.202837792 | 2.774405004  | 0.02074763  | 0.02074763  | -3.030570196 |
| 1434978_at   | 0.174264684  | 7.144039871 | 2.773090546  | 0.020793191 | 0.020793191 | -3.032328896 |
| 1434908_at   | -0.316321972 | 6.913313414 | -2.772636009 | 0.020808969 | 0.020808969 | -3.032937068 |
| 1418831_at   | 0.234927913  | 7.977583279 | 2.772378137  | 0.020817926 | 0.020817926 | -3.033282106 |
| 1454672_at   | 0.879932395  | 7.141752206 | 2.771474593  | 0.020849341 | 0.020849341 | -3.034491085 |
| 1457858_at   | -0.261514203 | 4.503589485 | -2.771167678 | 0.020860023 | 0.020860023 | -3.034901758 |
| 1418078_at   | -0.244516639 | 7.369683022 | -2.770476114 | 0.020884112 | 0.020884112 | -3.035827131 |
| 1444099_at   | -0.193667481 | 4.379000382 | -2.770264082 | 0.020891503 | 0.020891503 | -3.036110853 |
| 1430048_at   | 0.333918703  | 5.097574018 | 2.770193918  | 0.02089395  | 0.02089395  | -3.036204739 |
| 1458779_at   | -0.330761445 | 5.865043255 | -2.769659828 | 0.020912582 | 0.020912582 | -3.036919418 |
| 1440656_at   | 0.255616056  | 4.522627504 | 2.768786031  | 0.020943101 | 0.020943101 | -3.038088693 |
| 1440796_at   | -0.407497546 | 5.265302432 | -2.768739038 | 0.020944744 | 0.020944744 | -3.038151577 |
| 1450039_at   | 0.187780085  | 8.392846392 | 2.767812583  | 0.020977154 | 0.020977154 | -3.039391351 |
| 1425725_s_at | 0.214615715  | 7.511248956 | 2.767280929  | 0.020995775 | 0.020995775 | -3.040102822 |
| 1457907_at   | -0.308347106 | 4.290827543 | -2.767191506 | 0.020998909 | 0.020998909 | -3.040222491 |
| 1437098_x_at | -0.246463854 | 3.440223863 | -2.766118894 | 0.021036535 | 0.021036535 | -3.041657921 |
| 1419292_at   | -0.273114493 | 7.435075738 | -2.765579243 | 0.021055491 | 0.021055491 | -3.04238013  |
| 1447218_at   | -0.232359504 | 6.449547269 | -2.765379755 | 0.021062503 | 0.021062503 | -3.042647106 |
| 1452271_at   | -0.199833336 | 6.817573951 | -2.765066592 | 0.021073515 | 0.021073515 | -3.043066217 |
| 1429267_at   | -0.236463253 | 6.485580304 | -2.765057634 | 0.02107383  | 0.02107383  | -3.043078205 |
| 1438318_x_at | 0.214695815  | 9.371174031 | 2.765038164  | 0.021074515 | 0.021074515 | -3.043104262 |
| 1460107_at   | -0.532298551 | 4.172082584 | -2.764345529 | 0.021098892 | 0.021098892 | -3.04403124  |
| 1420066_s_at | -0.182450997 | 3.693609874 | -2.764158335 | 0.021105485 | 0.021105485 | -3.044281773 |
| 1423847_at   | 0.323113384  | 9.519925377 | 2.763821512  | 0.021117354 | 0.021117354 | -3.044732563 |
| 1437029_at   | 0.221601359  | 3.721306049 | 2.763455728  | 0.021130251 | 0.021130251 | -3.04522212  |
| 1444956_at   | -0.242447839 | 6.80294362  | -2.763245951 | 0.02113765  | 0.02113765  | -3.045502883 |
| 1457898_at   | 0.259104137  | 7.14364695  | 2.761666579  | 0.021193447 | 0.021193447 | -3.047616753 |
| 1435162_at   | 0.398162663  | 6.541301166 | 2.761455503  | 0.021200915 | 0.021200915 | -3.04789927  |
| 1417290_at   | 0.253688691  | 4.096924932 | 2.760637717  | 0.021229875 | 0.021229875 | -3.048993858 |
| 1448954_at   | 0.245760195  | 5.903178522 | 2.759581563  | 0.021267335 | 0.021267335 | -3.050407537 |
| 1429280_at   | -0.617905307 | 7.360308305 | -2.759461928 | 0.021271582 | 0.021271582 | -3.050567673 |



|              |              |             |              |             |             |              |
|--------------|--------------|-------------|--------------|-------------|-------------|--------------|
| 1434008_at   | -0.189410959 | 4.727573881 | -2.758656142 | 0.021300213 | 0.021300213 | -3.051646263 |
| 1458202_at   | -0.259430617 | 4.797199213 | -2.758396675 | 0.02130944  | 0.02130944  | -3.05199358  |
| 1417758_at   | -0.203451536 | 6.583425602 | -2.758287041 | 0.02131334  | 0.02131334  | -3.052140334 |
| 1437827_s_at | 0.205122223  | 3.479095995 | 2.758165887  | 0.021317651 | 0.021317651 | -3.052302509 |
| 1447988_at   | -0.259086942 | 5.900792625 | -2.757098952 | 0.021355652 | 0.021355652 | -3.053730719 |
| 1435365_at   | -0.205761782 | 5.509610326 | -2.757046447 | 0.021357524 | 0.021357524 | -3.053801004 |
| 1437217_at   | 0.268385495  | 8.413943565 | 2.757018371  | 0.021358525 | 0.021358525 | -3.053838588 |
| 1441182_at   | 0.186028703  | 5.627766101 | 2.756770812  | 0.021367353 | 0.021367353 | -3.05416998  |
| 1452291_at   | 0.288157926  | 6.821989086 | 2.756219245  | 0.021387036 | 0.021387036 | -3.054908337 |
| 1432202_a_at | -0.200000354 | 6.764472039 | -2.755414834 | 0.021415774 | 0.021415774 | -3.055985187 |
| 1449541_x_at | -0.302189345 | 4.596561595 | -2.754768707 | 0.021438886 | 0.021438886 | -3.056850161 |
| 1451508_at   | -0.270991678 | 5.547874331 | -2.754242394 | 0.021457731 | 0.021457731 | -3.057554751 |
| 1444061_at   | -0.234733834 | 3.763006346 | -2.753010297 | 0.021501911 | 0.021501911 | -3.059204237 |
| 1449182_at   | -0.19955698  | 5.835966689 | -2.752694344 | 0.021513256 | 0.021513256 | -3.059627232 |
| 1447129_at   | -0.22881163  | 3.362185039 | -2.752532008 | 0.021519087 | 0.021519087 | -3.059844568 |
| 1458049_at   | -0.209692083 | 5.246006112 | -2.751510915 | 0.021555801 | 0.021555801 | -3.061211629 |
| 1420394_s_at | 0.680624939  | 6.551343251 | 2.750519264  | 0.021591517 | 0.021591517 | -3.06253931  |
| 1419377_at   | 0.187778426  | 6.328113519 | 2.749092561  | 0.021643006 | 0.021643006 | -3.064449528 |
| 1460453_at   | -0.295966285 | 8.351821726 | -2.748311054 | 0.021671264 | 0.021671264 | -3.065495921 |
| 1425433_a_at | 0.309542338  | 3.949000353 | 2.74827929   | 0.021672413 | 0.021672413 | -3.065538453 |
| 1425660_at   | -0.321884937 | 7.731160755 | -2.747876515 | 0.021686992 | 0.021686992 | -3.066077754 |
| 1446481_at   | 0.214820105  | 7.08307406  | 2.747528721  | 0.021699588 | 0.021699588 | -3.066543444 |
| 1421133_at   | -0.219883139 | 5.818902977 | -2.747366469 | 0.021705467 | 0.021705467 | -3.066760697 |
| 1438700_at   | 0.188633515  | 7.996827706 | 2.746823964  | 0.021725136 | 0.021725136 | -3.067487112 |
| 1445428_at   | -0.358864865 | 4.320828893 | -2.746697857 | 0.02172971  | 0.02172971  | -3.067655972 |
| 1429660_s_at | 0.228506413  | 6.444729038 | 2.746600767  | 0.021733233 | 0.021733233 | -3.067785977 |
| 1452091_a_at | -0.270549749 | 9.106475927 | -2.745739169 | 0.02176452  | 0.02176452  | -3.068939687 |
| 1417750_a_at | 0.229334874  | 9.009785951 | 2.745261293  | 0.021781892 | 0.021781892 | -3.06957959  |
| 1426574_a_at | 0.238967799  | 9.242221472 | 2.744861817  | 0.021796425 | 0.021796425 | -3.070114519 |
| 1443969_at   | 0.254683072  | 7.300262122 | 2.744715683  | 0.021801743 | 0.021801743 | -3.070310204 |
| 1416953_at   | 0.351541609  | 9.638294609 | 2.744385877  | 0.021813752 | 0.021813752 | -3.070751844 |
| 1429363_at   | -0.204478473 | 6.173123381 | -2.743364413 | 0.021850987 | 0.021850987 | -3.072119704 |
| 1459144_at   | 0.34118406   | 6.385154738 | 2.742676073  | 0.021876115 | 0.021876115 | -3.073041492 |
| 1455793_at   | -0.196246702 | 7.772213529 | -2.742419896 | 0.021885475 | 0.021885475 | -3.073384554 |
| 1451191_at   | 0.226644819  | 10.07569385 | 2.742259094  | 0.021891352 | 0.021891352 | -3.073599896 |
| 1429886_at   | 0.218417874  | 6.078824269 | 2.741959761  | 0.021902296 | 0.021902296 | -3.074000757 |
| 1427038_at   | 0.207690166  | 10.3452856  | 2.741616041  | 0.021914869 | 0.021914869 | -3.074461062 |
| 1450962_at   | -0.226136161 | 3.905693286 | -2.740891698 | 0.021941391 | 0.021941391 | -3.075431108 |
| 1429177_x_at | 0.248106922  | 6.754698345 | 2.740865336  | 0.021942356 | 0.021942356 | -3.075466413 |
| 1429907_at   | -0.386516525 | 8.333303834 | -2.740009571 | 0.021973733 | 0.021973733 | -3.076612484 |
| 1420660_at   | -0.501599522 | 4.207371597 | -2.738982903 | 0.022011435 | 0.022011435 | -3.077987468 |
| 1449382_at   | -0.190602296 | 3.770948407 | -2.738267309 | 0.022037752 | 0.022037752 | -3.078945861 |
| 1430425_at   | -0.217280455 | 8.561420169 | -2.737871    | 0.022052341 | 0.022052341 | -3.079476645 |
| 1431797_at   | -0.204730753 | 4.221170595 | -2.736879449 | 0.022088884 | 0.022088884 | -3.080804669 |
| 1441504_at   | 0.224356344  | 3.612928216 | 2.736288092  | 0.022110707 | 0.022110707 | -3.081596714 |
| 1427026_at   | 0.176463449  | 3.53438726  | 2.735868444  | 0.022126207 | 0.022126207 | -3.082158784 |
| 1446713_at   | 0.481055673  | 4.026458078 | 2.735837599  | 0.022127347 | 0.022127347 | -3.082200097 |
| 1452065_at   | 0.528484349  | 5.868768522 | 2.735426376  | 0.022142547 | 0.022142547 | -3.082750889 |
| 1451440_at   | 0.274090713  | 9.439239537 | 2.73537845   | 0.022144319 | 0.022144319 | -3.082815081 |
| 1452072_at   | -0.171806381 | 6.548217369 | -2.735301681 | 0.022147158 | 0.022147158 | -3.082917906 |
| 1429152_at   | 0.317244955  | 8.441406524 | 2.733955594  | 0.022196997 | 0.022196997 | -3.084720899 |
| 1435467_at   | -0.243119234 | 6.485728176 | -2.733643472 | 0.02220857  | 0.02220857  | -3.085138974 |
| 1415921_a_at | -0.204780263 | 7.232655467 | -2.732821254 | 0.022239084 | 0.022239084 | -3.086240318 |

|              |              |             |              |             |             |              |
|--------------|--------------|-------------|--------------|-------------|-------------|--------------|
| 1459794_at   | 0.258175789  | 5.377817802 | 2.732820187  | 0.022239124 | 0.022239124 | -3.086241747 |
| 1430330_at   | -0.249052728 | 4.413239207 | -2.73162185  | 0.022283673 | 0.022283673 | -3.087846933 |
| 1417233_at   | -0.222964768 | 8.399068425 | -2.730483176 | 0.022326088 | 0.022326088 | -3.089372243 |
| 1430714_at   | -0.246637589 | 3.93369398  | -2.730190071 | 0.022337019 | 0.022337019 | -3.089764879 |
| 1437356_at   | -0.22134936  | 6.218394289 | -2.729419588 | 0.022365779 | 0.022365779 | -3.09079701  |
| 1419305_a_at | -0.213041583 | 7.23459357  | -2.729004776 | 0.022381279 | 0.022381279 | -3.091352696 |
| 1459214_at   | 0.436540876  | 6.200597577 | 2.728696747  | 0.022392795 | 0.022392795 | -3.091765338 |
| 1439485_at   | -0.263673653 | 8.593834672 | -2.728570469 | 0.022397518 | 0.022397518 | -3.091934503 |
| 1422774_at   | -0.250097463 | 6.619326114 | -2.727374253 | 0.022442308 | 0.022442308 | -3.093537012 |
| 1430478_at   | -0.183880906 | 4.329986027 | -2.726879452 | 0.022460861 | 0.022460861 | -3.094199885 |
| 1459218_at   | 0.263627739  | 4.438568296 | 2.726818867  | 0.022463134 | 0.022463134 | -3.09428105  |
| 1443381_at   | 0.306591306  | 4.648941425 | 2.726354796  | 0.022480551 | 0.022480551 | -3.094902762 |
| 1428985_at   | 0.217699923  | 8.375768737 | 2.726347533  | 0.022480824 | 0.022480824 | -3.094912491 |
| 1423521_at   | 0.523832321  | 10.01408689 | 2.725615625  | 0.022508321 | 0.022508321 | -3.095893037 |
| 1432771_at   | -0.231404953 | 3.706973242 | -2.724996281 | 0.022531615 | 0.022531615 | -3.096722791 |
| 1419354_at   | 0.249180519  | 8.504028863 | 2.724465374  | 0.022551603 | 0.022551603 | -3.097434074 |
| 1440886_at   | -0.421115652 | 7.117382782 | -2.724355608 | 0.022555737 | 0.022555737 | -3.097581135 |
| 1433930_at   | -0.219940583 | 7.147418251 | -2.72351747  | 0.022587334 | 0.022587334 | -3.09870405  |
| 1454089_at   | -0.193661552 | 3.864129889 | -2.723426552 | 0.022590764 | 0.022590764 | -3.098825861 |
| 1419339_at   | 0.18773649   | 5.309332726 | 2.722481699  | 0.022626443 | 0.022626443 | -3.10009178  |
| 1453290_at   | 0.199162596  | 7.782693433 | 2.722385751  | 0.022630069 | 0.022630069 | -3.100220333 |
| 1427600_at   | -0.313814767 | 6.649958681 | -2.722017802 | 0.022643981 | 0.022643981 | -3.10071332  |
| 1424761_at   | 0.22618508   | 6.993660118 | 2.721641997  | 0.022658198 | 0.022658198 | -3.101216839 |
| 1434581_at   | 0.233835306  | 6.95885808  | 2.720635251  | 0.02269633  | 0.02269633  | -3.102565736 |
| 1455216_at   | -0.241690227 | 5.071645566 | -2.720494581 | 0.022701663 | 0.022701663 | -3.102754217 |
| 1448007_at   | 0.287188891  | 7.14642804  | 2.719933445  | 0.02272295  | 0.02272295  | -3.103506076 |
| 1424083_at   | 0.209668968  | 7.15697036  | 2.719638325  | 0.022734154 | 0.022734154 | -3.103901508 |
| 1418756_at   | -0.247204495 | 5.3366202   | -2.718906898 | 0.022761945 | 0.022761945 | -3.104881558 |
| 1438866_at   | -0.305499099 | 6.079496347 | -2.71880472  | 0.02276583  | 0.02276583  | -3.10501847  |
| 1446265_at   | 0.227249918  | 4.603935761 | 2.717775505  | 0.022805001 | 0.022805001 | -3.10639756  |
| 1440093_at   | 0.283246126  | 7.544415257 | 2.717730717  | 0.022806707 | 0.022806707 | -3.106457575 |
| 1430273_at   | -0.209213652 | 4.274994074 | -2.717720009 | 0.022807115 | 0.022807115 | -3.106471922 |
| 1450370_a_at | -0.268609566 | 4.804320751 | -2.717063278 | 0.022832147 | 0.022832147 | -3.107351924 |
| 1417443_at   | -0.231589334 | 5.333162854 | -2.716463567 | 0.02285503  | 0.02285503  | -3.108155529 |
| 1456835_at   | -0.259162619 | 3.915564233 | -2.71644697  | 0.022855664 | 0.022855664 | -3.10817777  |
| 1430367_at   | -0.243560935 | 6.212598403 | -2.716259006 | 0.022862841 | 0.022862841 | -3.108429641 |
| 1455237_at   | -0.298027546 | 8.315947915 | -2.716234296 | 0.022863784 | 0.022863784 | -3.108462754 |
| 1419881_x_at | 0.210858768  | 3.341061292 | 2.71481869   | 0.022917912 | 0.022917912 | -3.110359701 |
| 1437777_at   | 0.319550007  | 5.093254842 | 2.714268733  | 0.022938975 | 0.022938975 | -3.111096672 |
| 1438602_s_at | -0.339460448 | 7.015012079 | -2.71398329  | 0.022949915 | 0.022949915 | -3.111479185 |
| 1427351_s_at | -0.26543644  | 6.127769381 | -2.713711386 | 0.022960341 | 0.022960341 | -3.111843556 |
| 1425876_a_at | 0.231938412  | 6.257510854 | 2.712781738  | 0.022996024 | 0.022996024 | -3.113089369 |
| 1421451_at   | -0.189092927 | 5.416856355 | -2.712620605 | 0.023002214 | 0.023002214 | -3.113305303 |
| 1436602_x_at | 0.335208306  | 3.935160996 | 2.712529706  | 0.023005707 | 0.023005707 | -3.113427119 |
| 1424808_at   | 0.258924117  | 7.972929576 | 2.712467106  | 0.023008113 | 0.023008113 | -3.113511009 |
| 1451675_a_at | 0.342467285  | 8.002182159 | 2.712401053  | 0.023010652 | 0.023010652 | -3.113599528 |
| 1425112_at   | -0.203783957 | 4.599308755 | -2.711701159 | 0.02303757  | 0.02303757  | -3.114537473 |
| 1439251_at   | 0.18117001   | 7.134238576 | 2.711099836  | 0.023060723 | 0.023060723 | -3.115343332 |
| 1455201_x_at | -0.301825179 | 4.758174933 | -2.710099551 | 0.023099289 | 0.023099289 | -3.116683877 |
| 1425336_x_at | -0.486619062 | 7.813786587 | -2.709981645 | 0.023103839 | 0.023103839 | -3.116841893 |
| 1458813_at   | -0.264458154 | 6.365839726 | -2.709974137 | 0.023104129 | 0.023104129 | -3.116851955 |
| 1439821_at   | -0.279541359 | 3.774496387 | -2.709521017 | 0.023121624 | 0.023121624 | -3.117459221 |
| 1441108_at   | 0.2955642    | 7.861843917 | 2.709323623  | 0.023129249 | 0.023129249 | -3.117723768 |

|              |              |             |              |             |             |              |
|--------------|--------------|-------------|--------------|-------------|-------------|--------------|
| 1428058_at   | -0.220489152 | 4.516500023 | -2.709150161 | 0.023135952 | 0.023135952 | -3.117956243 |
| 1433598_at   | 0.275191957  | 9.000231911 | 2.708770836  | 0.023150617 | 0.023150617 | -3.118464618 |
| 1450984_at   | 0.195226855  | 7.96174352  | 2.708763478  | 0.023150902 | 0.023150902 | -3.118474479 |
| 1434261_at   | 0.208681003  | 7.359049622 | 2.70739359   | 0.023203942 | 0.023203942 | -3.120310449 |
| 1416167_at   | -0.167070091 | 11.18948995 | -2.707320504 | 0.023206776 | 0.023206776 | -3.120408402 |
| 1460627_at   | -0.445769312 | 4.051654089 | -2.707013293 | 0.023218689 | 0.023218689 | -3.120820145 |
| 1444614_x_at | -0.308511238 | 6.4761964   | -2.706949134 | 0.023221177 | 0.023221177 | -3.120906135 |
| 1431851_at   | -0.229202981 | 4.400672957 | -2.705614161 | 0.023273022 | 0.023273022 | -3.122695375 |
| 1438697_at   | 0.300779781  | 6.422369264 | 2.705598809  | 0.023273619 | 0.023273619 | -3.122715952 |
| 1421011_at   | 0.466627706  | 5.89381239  | 2.70525049   | 0.023287166 | 0.023287166 | -3.123182805 |
| 1416559_at   | 0.290329805  | 7.831329416 | 2.705168067  | 0.023290373 | 0.023290373 | -3.123293278 |
| 1454082_a_at | 0.308087499  | 5.337702656 | 2.705004233  | 0.023296748 | 0.023296748 | -3.123512867 |
| 1440366_at   | -0.280764431 | 3.669470273 | -2.704572432 | 0.02331356  | 0.02331356  | -3.124091619 |
| 1436499_at   | 0.224540318  | 8.350343972 | 2.704381645  | 0.023320992 | 0.023320992 | -3.124347337 |
| 1444261_at   | -0.218084321 | 4.126562448 | -2.704163775 | 0.023329482 | 0.023329482 | -3.124639356 |
| 1436596_at   | 0.259620105  | 6.72182253  | 2.703762579  | 0.023345124 | 0.023345124 | -3.125177097 |
| 1426029_a_at | -0.261064553 | 3.863676625 | -2.703333655 | 0.023361858 | 0.023361858 | -3.125752006 |
| 1454088_at   | -0.202107719 | 5.029551602 | -2.703106329 | 0.023370732 | 0.023370732 | -3.126056706 |
| 1419206_at   | -0.205835168 | 4.371009672 | -2.702995593 | 0.023375056 | 0.023375056 | -3.126205133 |
| 1428144_at   | -0.216776888 | 8.566008199 | -2.70257945  | 0.023391313 | 0.023391313 | -3.12676292  |
| 1442547_at   | 0.186160518  | 4.601793136 | 2.702259859  | 0.023403805 | 0.023403805 | -3.127191295 |
| 1434413_at   | -0.227888165 | 11.56834626 | -2.70154467  | 0.023431786 | 0.023431786 | -3.128149933 |
| 1417262_at   | 0.40271669   | 3.719700518 | 2.701351258  | 0.023439359 | 0.023439359 | -3.128409184 |
| 1435062_at   | 0.247897005  | 3.989413135 | 2.700695569  | 0.023465049 | 0.023465049 | -3.129288083 |
| 1442567_at   | -0.18178628  | 3.891290595 | -2.70047978  | 0.02347351  | 0.02347351  | -3.129577332 |
| 1424897_at   | 0.185159235  | 6.067682905 | 2.700113833  | 0.023487866 | 0.023487866 | -3.130067862 |
| 1456755_at   | -0.182133883 | 4.184781205 | -2.699982387 | 0.023493025 | 0.023493025 | -3.130244058 |
| 1447343_at   | -0.261860253 | 6.634804461 | -2.69939629  | 0.02351604  | 0.02351604  | -3.131029693 |
| 1445752_at   | 0.221339787  | 4.40622348  | 2.698928949  | 0.023534409 | 0.023534409 | -3.131656149 |
| 1452292_at   | 0.345613043  | 9.725385637 | 2.697681945  | 0.023583492 | 0.023583492 | -3.133327744 |
| 1437376_at   | -0.200251556 | 3.679669132 | -2.697424279 | 0.023593647 | 0.023593647 | -3.133673147 |
| 1441767_at   | 0.278738162  | 5.665183623 | 2.695806697  | 0.023657497 | 0.023657497 | -3.135841564 |
| 1431006_at   | -0.218949513 | 6.091536694 | -2.695579811 | 0.023666467 | 0.023666467 | -3.136145717 |
| 1424268_at   | 0.200492433  | 8.536623232 | 2.694814078  | 0.023696765 | 0.023696765 | -3.137172232 |
| 1436999_at   | -0.307773827 | 8.177333629 | -2.694242723 | 0.023719397 | 0.023719397 | -3.13793818  |
| 1431297_a_at | -0.209770165 | 6.265417967 | -2.693775253 | 0.023737931 | 0.023737931 | -3.138564867 |
| 1447467_at   | 0.231885506  | 6.221946361 | 2.692779952  | 0.023777439 | 0.023777439 | -3.139899178 |
| 1431976_at   | -0.181766435 | 4.418191958 | -2.691422784 | 0.023831419 | 0.023831419 | -3.14171865  |
| 1456404_at   | -0.187673748 | 6.556023755 | -2.690771026 | 0.023857386 | 0.023857386 | -3.142592437 |
| 1450977_s_at | 0.292682162  | 7.544843203 | 2.690237481  | 0.023878664 | 0.023878664 | -3.143307748 |
| 1449877_s_at | 0.182355101  | 7.456951801 | 2.690135916  | 0.023882717 | 0.023882717 | -3.143443915 |
| 1443745_s_at | -0.816715274 | 8.843748605 | -2.689197804 | 0.023920182 | 0.023920182 | -3.144701638 |
| 1423280_at   | 1.120426208  | 8.648630343 | 2.689119482  | 0.023923313 | 0.023923313 | -3.144806643 |
| 1443825_x_at | -0.298544159 | 5.303527476 | -2.687830805 | 0.023974882 | 0.023974882 | -3.146534401 |
| 1424727_at   | 0.326186589  | 4.712454215 | 2.686169984  | 0.024041508 | 0.024041508 | -3.148761156 |
| 1449130_at   | -0.246399665 | 8.798015957 | -2.685038845 | 0.024086992 | 0.024086992 | -3.150277772 |
| 1417694_at   | 0.244143907  | 9.678209161 | 2.684976913  | 0.024089485 | 0.024089485 | -3.150360811 |
| 1442156_at   | -0.339584757 | 4.007021191 | -2.684602293 | 0.024104569 | 0.024104569 | -3.150863103 |
| 1435020_at   | 0.222062175  | 8.638917631 | 2.684462551  | 0.024110198 | 0.024110198 | -3.151050471 |
| 1441941_x_at | 0.460997204  | 5.755678269 | 2.684184162  | 0.024121417 | 0.024121417 | -3.151423738 |
| 1422912_at   | 0.187135615  | 9.309875576 | 2.683494581  | 0.024149228 | 0.024149228 | -3.152348346 |
| 1444552_at   | 0.217687049  | 5.696541645 | 2.681227619  | 0.024240882 | 0.024240882 | -3.155388016 |
| 1421410_a_at | 0.279951988  | 4.116903431 | 2.680605347  | 0.024266102 | 0.024266102 | -3.156222412 |

|              |              |             |              |             |             |              |
|--------------|--------------|-------------|--------------|-------------|-------------|--------------|
| 1439618_at   | 0.37591976   | 3.965660367 | 2.680473057  | 0.024271467 | 0.024271467 | -3.156399799 |
| 1420159_at   | 0.288954125  | 5.349730332 | 2.679404311  | 0.024314854 | 0.024314854 | -3.157832889 |
| 1430984_at   | 0.190083644  | 7.044936574 | 2.679262196  | 0.024320629 | 0.024320629 | -3.158023454 |
| 1444897_at   | -0.198053865 | 4.006409689 | -2.679258175 | 0.024320792 | 0.024320792 | -3.158028845 |
| 1454913_at   | 0.303243101  | 5.999856594 | 2.678065998  | 0.024369294 | 0.024369294 | -3.159627475 |
| 1418539_a_at | 0.268130884  | 7.611038615 | 2.676559513  | 0.024430721 | 0.024430721 | -3.161647612 |
| 1455650_at   | 0.440324904  | 3.94962965  | 2.676104063  | 0.024449323 | 0.024449323 | -3.162258362 |
| 1438355_at   | -0.182637334 | 3.802988049 | -2.675839437 | 0.024460137 | 0.024460137 | -3.162613222 |
| 1436503_at   | -0.185686064 | 4.407530493 | -2.675811822 | 0.024461266 | 0.024461266 | -3.162650253 |
| 1444268_at   | 0.220228353  | 5.900009755 | 2.675478639  | 0.02447489  | 0.02447489  | -3.163097049 |
| 1419637_s_at | 0.379708235  | 9.863332974 | 2.675459321  | 0.02447568  | 0.02447568  | -3.163122954 |
| 1432023_a_at | -0.215130179 | 6.172006401 | -2.675271674 | 0.024483356 | 0.024483356 | -3.163374588 |
| 1435968_at   | 0.253723672  | 4.83603592  | 2.674220271  | 0.024526413 | 0.024526413 | -3.164784532 |
| 1441977_at   | -0.20975651  | 8.767579557 | -2.673642463 | 0.024550107 | 0.024550107 | -3.165559387 |
| 1417780_at   | 0.19143037   | 7.599019799 | 2.673355292  | 0.024561892 | 0.024561892 | -3.165944495 |
| 1427123_s_at | 0.215909811  | 6.531684014 | 2.67267172   | 0.024589967 | 0.024589967 | -3.166861195 |
| 1429059_s_at | -0.409023678 | 8.372730216 | -2.672642821 | 0.024591155 | 0.024591155 | -3.16689995  |
| 1422445_at   | 0.206388461  | 10.03696672 | 2.670931179  | 0.024661598 | 0.024661598 | -3.169195378 |
| 1418379_s_at | 0.203494949  | 9.848273962 | 2.670580225  | 0.024676067 | 0.024676067 | -3.169666037 |
| 1457337_at   | -0.250500204 | 5.421634189 | -2.670577643 | 0.024676173 | 0.024676173 | -3.1696695   |
| 1432065_at   | -0.235118064 | 5.268021408 | -2.669241583 | 0.024731334 | 0.024731334 | -3.171461293 |
| 1457954_at   | -0.196412095 | 3.917651371 | -2.669114432 | 0.02473659  | 0.02473659  | -3.171631817 |
| 1418789_at   | 0.21646364   | 4.421493697 | 2.66809903   | 0.024778603 | 0.024778603 | -3.172993599 |
| 1451640_a_at | 0.18757182   | 9.204720272 | 2.667944392  | 0.024785008 | 0.024785008 | -3.17320099  |
| 1440849_at   | 0.384495948  | 5.329778578 | 2.667176863  | 0.024816821 | 0.024816821 | -3.174230357 |
| 1421066_at   | 0.167739241  | 9.028309326 | 2.666962954  | 0.024825694 | 0.024825694 | -3.174517243 |
| 1429464_at   | 0.24502331   | 3.68054079  | 2.6663871    | 0.024849599 | 0.024849599 | -3.175289554 |
| 1449347_a_at | 0.685193627  | 4.449364469 | 2.666004709  | 0.024865485 | 0.024865485 | -3.175802405 |
| 1458350_at   | -0.234033841 | 5.651872964 | -2.665977092 | 0.024866632 | 0.024866632 | -3.175839444 |
| 1418524_at   | -0.239500517 | 8.354690701 | -2.66591732  | 0.024869117 | 0.024869117 | -3.175919609 |
| 1420915_at   | 0.204388415  | 5.690673659 | 2.665214659  | 0.024898339 | 0.024898339 | -3.176862003 |
| 1453177_at   | 0.22221339   | 4.354350959 | 2.664497068  | 0.024928218 | 0.024928218 | -3.177824431 |
| 1457282_x_at | 0.226749479  | 6.439217777 | 2.664162337  | 0.024942167 | 0.024942167 | -3.178273372 |
| 1448950_at   | 0.26418621   | 8.272480404 | 2.662500343  | 0.025011546 | 0.025011546 | -3.180502468 |
| 1419955_at   | -0.170096297 | 5.032233493 | -2.662383383 | 0.025016436 | 0.025016436 | -3.180659337 |
| 1442233_at   | -0.240504442 | 4.870101199 | -2.661393298 | 0.025057867 | 0.025057867 | -3.181987281 |
| 1431058_at   | -0.304951031 | 4.837830093 | -2.660809762 | 0.025082318 | 0.025082318 | -3.182769951 |
| 1455028_at   | 0.58215679   | 5.566689441 | 2.659873061  | 0.025121617 | 0.025121617 | -3.184026317 |
| 1424208_at   | 0.232595197  | 7.56433692  | 2.659526544  | 0.02513617  | 0.02513617  | -3.184491091 |
| 1449420_at   | 0.296324982  | 6.725720432 | 2.658879673  | 0.025163361 | 0.025163361 | -3.185358729 |
| 1419038_a_at | 0.266030171  | 9.338050994 | 2.657716957  | 0.02521231  | 0.02521231  | -3.186918278 |
| 1417169_at   | -0.210192532 | 7.532085212 | -2.656916637 | 0.025246059 | 0.025246059 | -3.187991759 |
| 1456860_at   | 0.214019532  | 5.273977696 | 2.656569626  | 0.025260705 | 0.025260705 | -3.188457211 |
| 1426595_at   | -0.241112963 | 4.812250337 | -2.656044762 | 0.025282876 | 0.025282876 | -3.189161227 |
| 1430887_s_at | -0.229395475 | 6.145212838 | -2.655964862 | 0.025286252 | 0.025286252 | -3.1892684   |
| 1457047_at   | 0.48514991   | 5.721147545 | 2.655772309  | 0.025294392 | 0.025294392 | -3.189526678 |
| 1422276_at   | -0.237466631 | 4.250083923 | -2.655607518 | 0.02530136  | 0.02530136  | -3.189747718 |
| 1453282_at   | 0.325535531  | 8.27777301  | 2.655323268  | 0.025313383 | 0.025313383 | -3.190128995 |
| 1422864_at   | 0.393812976  | 8.518469744 | 2.655253318  | 0.025316343 | 0.025316343 | -3.190222822 |
| 1447313_at   | -0.230752135 | 6.195701685 | -2.654171463 | 0.025362163 | 0.025362163 | -3.191673971 |
| 1453121_at   | -0.611656916 | 5.917241736 | -2.653403826 | 0.025394725 | 0.025394725 | -3.192703653 |
| 1439630_x_at | 0.553439882  | 7.892267615 | 2.651641793  | 0.025469627 | 0.025469627 | -3.195067216 |
| 1447632_at   | -0.286834765 | 6.21159472  | -2.651213355 | 0.025487873 | 0.025487873 | -3.195641922 |

|              |              |             |              |             |             |              |
|--------------|--------------|-------------|--------------|-------------|-------------|--------------|
| 1422026_at   | -0.196787607 | 3.975914866 | -2.651087492 | 0.025493236 | 0.025493236 | -3.195810755 |
| 1428811_at   | -0.162772123 | 6.578755281 | -2.65094826  | 0.025499169 | 0.025499169 | -3.195997522 |
| 1449418_s_at | -0.375649385 | 5.708079039 | -2.650909332 | 0.025500829 | 0.025500829 | -3.19604974  |
| 1439635_at   | -0.222077513 | 3.931712673 | -2.650721521 | 0.025508835 | 0.025508835 | -3.196301672 |
| 1422029_at   | -0.221673496 | 5.163097955 | -2.648907119 | 0.025586315 | 0.025586315 | -3.198735549 |
| 1441768_at   | -0.2426714   | 6.618606517 | -2.64853598  | 0.025602193 | 0.025602193 | -3.199233408 |
| 1436419_a_at | -0.741222852 | 4.627275957 | -2.648224537 | 0.025615524 | 0.025615524 | -3.199651191 |
| 1447795_at   | -0.256528677 | 3.571281304 | -2.647025936 | 0.025666896 | 0.025666896 | -3.201259054 |
| 1419109_at   | -0.343942754 | 8.537470425 | -2.646760804 | 0.025678274 | 0.025678274 | -3.201614719 |
| 1429493_at   | 0.212870707  | 6.262214346 | 2.64554722   | 0.025730416 | 0.025730416 | -3.203242703 |
| 1444133_at   | -0.171733687 | 4.625353877 | -2.644377559 | 0.025780772 | 0.025780772 | -3.204811784 |
| 1459635_at   | 0.422125664  | 7.564624037 | 2.644251796  | 0.025786193 | 0.025786193 | -3.204980495 |
| 1459728_at   | -0.218915241 | 5.663418572 | -2.644043569 | 0.025795169 | 0.025795169 | -3.205259831 |
| 1457028_at   | -0.246424138 | 7.171746604 | -2.643827301 | 0.025804496 | 0.025804496 | -3.205549953 |
| 1427975_at   | -0.217358006 | 4.188428959 | -2.643578372 | 0.025815236 | 0.025815236 | -3.205883891 |
| 1445952_at   | 0.507886444  | 6.880168264 | 2.643433355  | 0.025821494 | 0.025821494 | -3.206078432 |
| 1450119_at   | 0.302799257  | 8.159420559 | 2.642741475  | 0.025851375 | 0.025851375 | -3.207006593 |
| 1448680_at   | -0.322652736 | 4.604489795 | -2.642270231 | 0.025871746 | 0.025871746 | -3.207638773 |
| 1452328_s_at | -0.252134747 | 7.428361519 | -2.642226341 | 0.025873645 | 0.025873645 | -3.207697653 |
| 1430408_at   | -0.168251938 | 4.821637881 | -2.641398396 | 0.025909478 | 0.025909478 | -3.208808358 |
| 1441506_at   | -0.298969144 | 6.248298621 | -2.64083194  | 0.025934023 | 0.025934023 | -3.209568276 |
| 1456333_a_at | 0.2366112    | 6.007645752 | 2.63933185   | 0.025999135 | 0.025999135 | -3.211580707 |
| 1447725_at   | -0.172614149 | 5.523762811 | -2.639246921 | 0.026002827 | 0.026002827 | -3.211694645 |
| 1436296_x_at | -0.731918818 | 5.744232439 | -2.638993987 | 0.026013823 | 0.026013823 | -3.212033969 |
| 1430521_s_at | -0.174571177 | 7.577295567 | -2.638424249 | 0.02603861  | 0.02603861  | -3.212798304 |
| 1454884_at   | -0.214004257 | 4.795548961 | -2.638069252 | 0.026054067 | 0.026054067 | -3.213274554 |
| 1448147_at   | -0.237992133 | 9.804828681 | -2.638063504 | 0.026054317 | 0.026054317 | -3.213282265 |
| 1434195_at   | -0.36822809  | 8.39327176  | -2.637259691 | 0.026089349 | 0.026089349 | -3.214360634 |
| 1444517_at   | -0.256898741 | 5.022844967 | -2.637136432 | 0.026094725 | 0.026094725 | -3.214525995 |
| 1424603_at   | -0.187448715 | 6.869316007 | -2.637094423 | 0.026096558 | 0.026096558 | -3.214582353 |
| 1455200_at   | 0.183892252  | 5.203292463 | 2.636838415  | 0.026107728 | 0.026107728 | -3.214925807 |
| 1449368_at   | -0.290104568 | 11.38481459 | -2.636744477 | 0.026111828 | 0.026111828 | -3.215051832 |
| 1446998_at   | -0.25294713  | 6.204205166 | -2.636389487 | 0.026127328 | 0.026127328 | -3.215528079 |
| 1457000_at   | -0.224764174 | 3.825487625 | -2.636286192 | 0.02613184  | 0.02613184  | -3.215666658 |
| 1453770_at   | -0.220510886 | 4.493232383 | -2.636019447 | 0.026143495 | 0.026143495 | -3.216024518 |
| 1447911_at   | 0.345017699  | 4.919521643 | 2.635987681  | 0.026144883 | 0.026144883 | -3.216067134 |
| 1451506_at   | -0.32727968  | 9.43698646  | -2.63563972  | 0.026160095 | 0.026160095 | -3.216533954 |
| 1419598_at   | 0.488605997  | 5.038916145 | 2.635425281  | 0.026169474 | 0.026169474 | -3.216821643 |
| 1460210_at   | -0.364669362 | 7.76672542  | -2.634016609 | 0.026231171 | 0.026231171 | -3.218711514 |
| 1430156_at   | -0.186013665 | 4.202459111 | -2.633757035 | 0.026242556 | 0.026242556 | -3.219059759 |
| 1442884_at   | 0.414146928  | 6.606331029 | 2.633444665  | 0.026256262 | 0.026256262 | -3.219478837 |
| 1436426_at   | 0.200310951  | 8.11444675  | 2.63340416   | 0.02625804  | 0.02625804  | -3.21953318  |
| 1438089_a_at | -0.181657404 | 10.25692261 | -2.633306135 | 0.026262343 | 0.026262343 | -3.219664691 |
| 1430865_s_at | -0.189440462 | 4.195560625 | -2.632112216 | 0.026314811 | 0.026314811 | -3.221266472 |
| 1421040_a_at | -0.186397811 | 3.807472463 | -2.631793454 | 0.026328837 | 0.026328837 | -3.22169413  |
| 1449145_a_at | 0.259980958  | 10.3926187  | 2.631013785  | 0.026363176 | 0.026363176 | -3.222740156 |
| 1431762_at   | -0.215482086 | 5.652975089 | -2.630101669 | 0.026403404 | 0.026403404 | -3.223963883 |
| 1426255_at   | 0.78994987   | 7.540469738 | 2.629507041  | 0.026429663 | 0.026429663 | -3.224761662 |
| 1440180_x_at | -0.200391075 | 4.832470654 | -2.62942138  | 0.026433448 | 0.026433448 | -3.224876588 |
| 1432032_a_at | 0.191253474  | 5.415820684 | 2.628835456  | 0.026459352 | 0.026459352 | -3.225662692 |
| 1437401_at   | -0.226265583 | 11.82545677 | -2.627761815 | 0.026506884 | 0.026506884 | -3.227103147 |
| 1425383_a_at | 0.277676202  | 8.973001431 | 2.627717912  | 0.02650883  | 0.02650883  | -3.22716205  |
| 1423859_a_at | -0.260551304 | 6.657774761 | -2.627455865 | 0.026520445 | 0.026520445 | -3.227513628 |



|              |              |             |              |             |             |              |
|--------------|--------------|-------------|--------------|-------------|-------------|--------------|
| 1424966_at   | 0.219031444  | 5.678936316 | 2.626859422  | 0.026546901 | 0.026546901 | -3.228313854 |
| 1444477_at   | -0.2542173   | 4.12494317  | -2.626630604 | 0.026557058 | 0.026557058 | -3.228620852 |
| 1425182_x_at | -0.212617972 | 4.515068004 | -2.626495436 | 0.026563059 | 0.026563059 | -3.228802202 |
| 1429130_at   | -0.514613663 | 5.218367398 | -2.625937959 | 0.026587826 | 0.026587826 | -3.229550153 |
| 1433707_at   | 0.424617739  | 6.548990884 | 2.625515737  | 0.0266066   | 0.0266066   | -3.230116638 |
| 1453274_at   | -0.456784579 | 5.66623232  | -2.625393314 | 0.026612046 | 0.026612046 | -3.230280891 |
| 1443928_at   | -0.195288154 | 6.156398376 | -2.625237181 | 0.026618993 | 0.026618993 | -3.230490371 |
| 1458486_at   | 0.175666108  | 3.873020193 | 2.625102661  | 0.026624979 | 0.026624979 | -3.230670854 |
| 1449805_at   | -0.202784362 | 5.003208752 | -2.624918139 | 0.026633194 | 0.026633194 | -3.230918423 |
| 1417181_a_at | 0.177920342  | 8.815173287 | 2.623928136  | 0.026677309 | 0.026677309 | -3.232246695 |
| 1416411_at   | 0.173981482  | 7.650910797 | 2.62353296   | 0.026694938 | 0.026694938 | -3.232776899 |
| 1455256_at   | 0.265415737  | 7.368793549 | 2.623320181  | 0.026704436 | 0.026704436 | -3.233062382 |
| 1433150_at   | -0.186862383 | 5.665969344 | -2.620991735 | 0.026808588 | 0.026808588 | -3.23618646  |
| 1435766_at   | 0.240865985  | 6.580228067 | 2.620876737  | 0.026813742 | 0.026813742 | -3.236340754 |
| 1437484_at   | 0.274157523  | 7.529165491 | 2.620784441  | 0.02681788  | 0.02681788  | -3.236464588 |
| 1425574_at   | 0.235075648  | 9.744907654 | 2.620243136  | 0.026842159 | 0.026842159 | -3.237190863 |
| 1435124_at   | 0.225367954  | 4.064393385 | 2.619875515  | 0.026858661 | 0.026858661 | -3.237684104 |
| 1446283_at   | -0.203768341 | 4.084095736 | -2.619365661 | 0.026881564 | 0.026881564 | -3.238368185 |
| 1441651_at   | -0.195088681 | 3.857807582 | -2.617181517 | 0.026979898 | 0.026979898 | -3.241298705 |
| 1431361_at   | 0.179473164  | 4.338008882 | 2.617049599  | 0.026985849 | 0.026985849 | -3.241475702 |
| 1456931_at   | -0.241769458 | 5.38664874  | -2.615928864 | 0.027036458 | 0.027036458 | -3.242979432 |
| 1448330_at   | 0.292384817  | 7.513934681 | 2.615722078  | 0.027045806 | 0.027045806 | -3.243256885 |
| 1439816_at   | -0.87027174  | 5.148269256 | -2.615395639 | 0.02706057  | 0.02706057  | -3.24369488  |
| 1456950_at   | -0.336848814 | 5.769388109 | -2.61520346  | 0.027069266 | 0.027069266 | -3.243952735 |
| 1426089_a_at | 0.270468616  | 8.733520111 | 2.614476861  | 0.027102167 | 0.027102167 | -3.244927644 |
| 1446874_at   | -0.246178432 | 3.641157688 | -2.614076544 | 0.027120311 | 0.027120311 | -3.245464768 |
| 1423674_at   | 0.404691112  | 9.098996417 | 2.614029464  | 0.027122446 | 0.027122446 | -3.245527937 |
| 1433273_at   | -0.204725342 | 5.438822816 | -2.613729608 | 0.027136046 | 0.027136046 | -3.245930268 |
| 1454255_at   | 0.213845791  | 5.91752615  | 2.613463037  | 0.027148142 | 0.027148142 | -3.246287939 |
| 1434816_at   | 0.256909732  | 7.059114848 | 2.613277284  | 0.027156574 | 0.027156574 | -3.246537173 |
| 1446083_at   | 0.202592857  | 4.410190251 | 2.612418287  | 0.027195601 | 0.027195601 | -3.247689734 |
| 1418674_at   | 0.257731117  | 4.020453402 | 2.612303155  | 0.027200836 | 0.027200836 | -3.247844213 |
| 1455687_at   | 0.188599876  | 8.059286919 | 2.612164586  | 0.027207138 | 0.027207138 | -3.248030139 |
| 1417217_at   | -0.338535395 | 7.114421587 | -2.611904914 | 0.027218952 | 0.027218952 | -3.248378556 |
| 1419098_at   | 0.219199019  | 5.808771347 | 2.611787753  | 0.027224284 | 0.027224284 | -3.248535757 |
| 1441585_at   | -0.198264278 | 4.421308198 | -2.610020768 | 0.027304825 | 0.027304825 | -3.250906626 |
| 1424936_a_at | -0.427584262 | 6.285941289 | -2.609851843 | 0.027312538 | 0.027312538 | -3.251133284 |
| 1418799_a_at | 0.249842755  | 8.6104976   | 2.609623903  | 0.027322948 | 0.027322948 | -3.251439126 |
| 1432513_a_at | -0.504818753 | 5.447409457 | -2.609027025 | 0.027350226 | 0.027350226 | -3.252239997 |
| 1449088_at   | 0.198168279  | 5.136401472 | 2.608688216  | 0.027365723 | 0.027365723 | -3.2526946   |
| 1419555_at   | 0.345058024  | 7.057730582 | 2.608464605  | 0.027375955 | 0.027375955 | -3.252994633 |
| 1450839_at   | 0.192377821  | 12.42904233 | 2.606988149  | 0.027443613 | 0.027443613 | -3.254975699 |
| 1456847_at   | -0.157379171 | 3.310872109 | -2.60617286  | 0.027481045 | 0.027481045 | -3.256069633 |
| 1418105_at   | 0.590747135  | 6.641482396 | 2.605950257  | 0.027491274 | 0.027491274 | -3.256368317 |
| 1436820_at   | 0.204835731  | 7.072557472 | 2.605802449  | 0.027498068 | 0.027498068 | -3.256566642 |
| 1448566_at   | -0.199197657 | 7.583392362 | -2.605638337 | 0.027505614 | 0.027505614 | -3.256786843 |
| 1443851_at   | 0.228484316  | 5.473595027 | 2.605478524  | 0.027512964 | 0.027512964 | -3.257001277 |
| 1454031_at   | 0.24937283   | 6.331402446 | 2.605267974  | 0.02752265  | 0.02752265  | -3.257283789 |
| 1437031_at   | -0.203702001 | 4.255268313 | -2.605254401 | 0.027523275 | 0.027523275 | -3.257302001 |
| 1426963_at   | 0.189577243  | 9.100898024 | 2.60508819   | 0.027530924 | 0.027530924 | -3.257525019 |
| 1432127_at   | -0.226612691 | 4.445543983 | -2.604312235 | 0.027566662 | 0.027566662 | -3.258566179 |
| 1447013_at   | 0.302173843  | 5.16383985  | 2.60370824   | 0.027594513 | 0.027594513 | -3.259376609 |
| 1460513_a_at | 0.302299461  | 7.122482984 | 2.60339338   | 0.027609042 | 0.027609042 | -3.259799082 |

|              |              |             |              |             |             |              |
|--------------|--------------|-------------|--------------|-------------|-------------|--------------|
| 1454713_s_at | -0.793903141 | 5.213701943 | -2.603329338 | 0.027611998 | 0.027611998 | -3.259885012 |
| 1443410_at   | 0.169597752  | 3.418295957 | 2.603132216  | 0.0276211   | 0.0276211   | -3.260149508 |
| 1451698_at   | -0.183481611 | 4.001829922 | -2.60196732  | 0.027674945 | 0.027674945 | -3.261712546 |
| 1451553_at   | -0.218132461 | 4.310203219 | -2.601437752 | 0.027699458 | 0.027699458 | -3.262423113 |
| 1437018_at   | 0.254367158  | 4.042403234 | 2.601226077  | 0.027709262 | 0.027709262 | -3.262707135 |
| 1428392_at   | -0.22561272  | 5.609522389 | -2.600994781 | 0.027719979 | 0.027719979 | -3.263017484 |
| 1429981_a_at | 0.307421621  | 4.897679321 | 2.599507484  | 0.027788992 | 0.027788992 | -3.265013121 |
| 1454984_at   | -0.196990706 | 8.695974392 | -2.599481276 | 0.02779021  | 0.02779021  | -3.265048287 |
| 1458913_at   | 0.202185122  | 3.73713892  | 2.599212404  | 0.027802705 | 0.027802705 | -3.265409056 |
| 1439827_at   | -0.210107172 | 9.022971168 | -2.598824124 | 0.027820759 | 0.027820759 | -3.265930045 |
| 1432414_at   | -0.185752525 | 3.640185406 | -2.597952405 | 0.027861334 | 0.027861334 | -3.267099709 |
| 1450448_at   | 0.215113366  | 7.24215019  | 2.597833486  | 0.027866874 | 0.027866874 | -3.267259273 |
| 1453275_at   | 0.392359495  | 3.987643298 | 2.597729932  | 0.027871699 | 0.027871699 | -3.26739822  |
| 1419593_at   | 0.384369729  | 5.508192169 | 2.597485142  | 0.027883108 | 0.027883108 | -3.267726677 |
| 1431122_at   | -0.202046153 | 4.290391445 | -2.597427051 | 0.027885816 | 0.027885816 | -3.267804622 |
| 1435361_at   | 0.241276329  | 5.965524514 | 2.597212361  | 0.027895827 | 0.027895827 | -3.268092692 |
| 1439622_at   | -0.277288408 | 6.412457395 | -2.597145964 | 0.027898924 | 0.027898924 | -3.268181783 |
| 1432247_at   | -0.240045823 | 3.866474205 | -2.596778995 | 0.027916045 | 0.027916045 | -3.268674177 |
| 1422649_at   | -0.474793251 | 7.619081981 | -2.596112172 | 0.027947185 | 0.027947185 | -3.269568914 |
| 1434502_x_at | 0.305945776  | 6.551348029 | 2.595517844  | 0.027974968 | 0.027974968 | -3.270366378 |
| 1419340_at   | -0.210221975 | 4.51845578  | -2.595151471 | 0.027992109 | 0.027992109 | -3.270857973 |
| 1426478_at   | 0.242315867  | 6.813221963 | 2.59467413   | 0.028014457 | 0.028014457 | -3.271498464 |
| 1446647_at   | 0.201441107  | 3.249266698 | 2.594596795  | 0.028018079 | 0.028018079 | -3.271602232 |
| 1417017_at   | -0.219924819 | 5.225337206 | -2.594091552 | 0.028041756 | 0.028041756 | -3.272280162 |
| 1416321_s_at | -0.35997635  | 5.943293096 | -2.593295152 | 0.028079118 | 0.028079118 | -3.273348764 |
| 1427410_at   | -0.188300292 | 7.810904273 | -2.592942079 | 0.028095697 | 0.028095697 | -3.273822512 |
| 1453771_at   | 0.261724302  | 9.285881312 | 2.592597608  | 0.028111883 | 0.028111883 | -3.27428472  |
| 1437191_at   | -0.32238131  | 4.174822276 | -2.59142521  | 0.028167039 | 0.028167039 | -3.275857831 |
| 1430838_x_at | -0.178117455 | 5.380503704 | -2.591404898 | 0.028167995 | 0.028167995 | -3.275885085 |
| 1450554_at   | -0.228156515 | 4.81503842  | -2.591300334 | 0.02817292  | 0.02817292  | -3.276025387 |
| 1416629_at   | -0.640901696 | 6.215232312 | -2.591282466 | 0.028173762 | 0.028173762 | -3.276049363 |
| 1418937_at   | -0.414509749 | 5.285803384 | -2.591017244 | 0.028186257 | 0.028186257 | -3.276405235 |
| 1417399_at   | -0.227154775 | 8.320193143 | -2.59079891  | 0.028196548 | 0.028196548 | -3.276698192 |
| 1453794_at   | -0.188504117 | 4.629398217 | -2.589870386 | 0.028240353 | 0.028240353 | -3.277944073 |
| 1445880_at   | 0.489987311  | 7.370368585 | 2.589469286  | 0.028259298 | 0.028259298 | -3.278482264 |
| 1435492_at   | 0.31719227   | 7.932678977 | 2.589437235  | 0.028260812 | 0.028260812 | -3.27852527  |
| 1423281_at   | 0.972689635  | 8.108758659 | 2.588149397  | 0.028321726 | 0.028321726 | -3.28025327  |
| 1433023_at   | -0.318867859 | 7.326723595 | -2.587808075 | 0.028337892 | 0.028337892 | -3.280711251 |
| 1455288_at   | -0.222240413 | 9.56769483  | -2.587367324 | 0.028358782 | 0.028358782 | -3.281302642 |
| 1446591_at   | -0.291442055 | 5.514373908 | -2.587289256 | 0.028362483 | 0.028362483 | -3.281407392 |
| 1448992_at   | 0.545713171  | 5.413917343 | 2.586582655  | 0.028396009 | 0.028396009 | -3.282355496 |
| 1422631_at   | 0.266047998  | 10.22645219 | 2.586184372  | 0.028414924 | 0.028414924 | -3.282889904 |
| 1434354_at   | 0.237611681  | 7.187346452 | 2.585920448  | 0.028427465 | 0.028427465 | -3.283244031 |
| 1417832_at   | 0.306709568  | 7.806330195 | 2.58585973   | 0.02843035  | 0.02843035  | -3.283325502 |
| 1433506_at   | 0.195784065  | 6.762208655 | 2.585615555  | 0.028441959 | 0.028441959 | -3.28365313  |
| 1449858_at   | -0.306131052 | 4.536226236 | -2.585148066 | 0.028464197 | 0.028464197 | -3.284280396 |
| 1422917_at   | 0.233356922  | 6.610019283 | 2.584892762  | 0.02847635  | 0.02847635  | -3.284622958 |
| 1417812_a_at | 0.269012514  | 7.507403337 | 2.584638609  | 0.028488452 | 0.028488452 | -3.284963974 |
| 1430183_at   | 0.215327262  | 9.112992651 | 2.584548378  | 0.02849275  | 0.02849275  | -3.285085043 |
| 1450377_at   | -0.24527686  | 8.060545426 | -2.584392967 | 0.028500154 | 0.028500154 | -3.28529357  |
| 1424298_at   | 0.223333212  | 6.45964107  | 2.584129477  | 0.028512712 | 0.028512712 | -3.285647113 |
| 1427982_s_at | 0.197063221  | 7.792385898 | 2.583711098  | 0.028532663 | 0.028532663 | -3.286208484 |
| 1439061_at   | 0.225291788  | 5.97104895  | 2.582762502  | 0.02857795  | 0.02857795  | -3.287481282 |

|              |              |             |              |             |             |              |
|--------------|--------------|-------------|--------------|-------------|-------------|--------------|
| 1419663_at   | -0.216510379 | 11.30339567 | -2.582675092 | 0.028582127 | 0.028582127 | -3.287598566 |
| 1448964_at   | -0.294772389 | 3.747832657 | -2.582282558 | 0.02860089  | 0.02860089  | -3.288125256 |
| 1460467_at   | -0.422301137 | 5.565884168 | -2.582135704 | 0.028607913 | 0.028607913 | -3.2883223   |
| 1455332_x_at | 0.415388706  | 5.997441314 | 2.581730198  | 0.028627315 | 0.028627315 | -3.288866394 |
| 1444824_at   | -0.242585075 | 4.862205671 | -2.580516317 | 0.028685472 | 0.028685472 | -3.290495136 |
| 1438784_at   | 0.282196009  | 7.559190902 | 2.580307768  | 0.028695475 | 0.028695475 | -3.290774958 |
| 1443646_at   | 0.18885761   | 3.340628612 | 2.580028134  | 0.028708894 | 0.028708894 | -3.291150161 |
| 1428781_at   | 0.4978011    | 6.777338338 | 2.579354243  | 0.028741257 | 0.028741257 | -3.29205436  |
| 1456116_at   | 0.189006544  | 5.455524583 | 2.579137988  | 0.028751651 | 0.028751651 | -3.29234452  |
| 1428306_at   | 0.851770521  | 9.950087886 | 2.579063787  | 0.028755218 | 0.028755218 | -3.292444081 |
| 1421426_at   | -0.20982919  | 6.993055313 | -2.578783463 | 0.028768697 | 0.028768697 | -3.292820206 |
| 1437501_at   | 0.242241225  | 3.635667825 | 2.578545015  | 0.028780168 | 0.028780168 | -3.293140145 |
| 1419282_at   | 0.328829709  | 5.613376425 | 2.578197575  | 0.028796891 | 0.028796891 | -3.293606323 |
| 1430067_at   | -0.216675442 | 3.480397105 | -2.577789566 | 0.028816541 | 0.028816541 | -3.29415377  |
| 1423026_at   | 0.181697081  | 6.718637996 | 2.575701699  | 0.028917305 | 0.028917305 | -3.296955156 |
| 1419665_a_at | -0.462270883 | 7.263398    | -2.575557922 | 0.028924257 | 0.028924257 | -3.297148067 |
| 1418353_at   | -0.206464505 | 5.004876702 | -2.57553317  | 0.028925454 | 0.028925454 | -3.297181277 |
| 1418589_a_at | -0.450932175 | 7.796846142 | -2.574964835 | 0.028952952 | 0.028952952 | -3.297943834 |
| 1449824_at   | -0.355941197 | 5.198096144 | -2.574674552 | 0.028967006 | 0.028967006 | -3.298333316 |
| 1439918_at   | -0.265683375 | 6.49717361  | -2.574507797 | 0.028975083 | 0.028975083 | -3.298557058 |
| 1416768_at   | -0.176426911 | 9.9063797   | -2.573869071 | 0.029006041 | 0.029006041 | -3.299414057 |
| 1436624_at   | 0.257063453  | 6.438320673 | 2.573858879  | 0.029006536 | 0.029006536 | -3.299427732 |
| 1433683_at   | 0.286529086  | 7.871867269 | 2.573743265  | 0.029012143 | 0.029012143 | -3.299582855 |
| 1455590_at   | -0.190368426 | 7.55431033  | -2.573593292 | 0.029019418 | 0.029019418 | -3.299784078 |
| 1424889_at   | -0.169270141 | 6.245611629 | -2.573450121 | 0.029026365 | 0.029026365 | -3.299976173 |
| 1454681_at   | 0.24068773   | 9.052672521 | 2.573389992  | 0.029029283 | 0.029029283 | -3.300056851 |
| 1428973_s_at | -0.33989402  | 8.702481757 | -2.573025296 | 0.029046988 | 0.029046988 | -3.300546173 |
| 1452485_at   | -0.332769465 | 5.801655939 | -2.572502886 | 0.029072369 | 0.029072369 | -3.301247103 |
| 1430194_at   | -0.192780898 | 4.180895811 | -2.571961452 | 0.029098697 | 0.029098697 | -3.301973556 |
| 1428101_at   | -0.202655951 | 9.24635595  | -2.571203754 | 0.029135582 | 0.029135582 | -3.302990172 |
| 1420656_at   | -0.255333798 | 6.251069352 | -2.570153567 | 0.029186782 | 0.029186782 | -3.304399221 |
| 1450268_at   | -0.224148976 | 5.921342679 | -2.56957211  | 0.029215169 | 0.029215169 | -3.305179365 |
| 1442651_at   | -0.319479755 | 5.758927619 | -2.568559298 | 0.02926468  | 0.02926468  | -3.306538255 |
| 1447654_at   | -0.176630137 | 4.549321422 | -2.568312871 | 0.029276739 | 0.029276739 | -3.306868885 |
| 1449221_a_at | -0.205195107 | 8.515418121 | -2.567933582 | 0.02929531  | 0.02929531  | -3.307377775 |
| 1424410_at   | 0.194263239  | 8.45686104  | 2.567901734  | 0.02929687  | 0.02929687  | -3.307420505 |
| 1421041_s_at | -0.221398177 | 3.980710497 | -2.566503415 | 0.02936544  | 0.02936544  | -3.309296612 |
| 1441213_at   | -0.34269775  | 4.874336386 | -2.566406907 | 0.029370178 | 0.029370178 | -3.309426095 |
| 1425119_at   | 0.179387712  | 5.736074292 | 2.566130129  | 0.029383772 | 0.029383772 | -3.309797443 |
| 1438187_at   | -0.27189599  | 7.166957489 | -2.566125355 | 0.029384006 | 0.029384006 | -3.309803848 |
| 1442723_at   | -0.204085406 | 4.477951725 | -2.566068464 | 0.029386801 | 0.029386801 | -3.309880178 |
| 1457929_at   | -0.187839941 | 3.988587869 | -2.565342688 | 0.02942248  | 0.02942248  | -3.310853934 |
| 1447446_at   | 0.210692957  | 3.506017741 | 2.565219615  | 0.029428535 | 0.029428535 | -3.311019058 |
| 1452359_at   | 0.192288366  | 8.619790996 | 2.565064779  | 0.029436154 | 0.029436154 | -3.311226797 |
| 1433837_at   | -0.220748325 | 7.620070557 | -2.564771231 | 0.029450603 | 0.029450603 | -3.311620642 |
| 1431004_at   | 0.246809316  | 9.900197902 | 2.564708766  | 0.029453679 | 0.029453679 | -3.311704449 |
| 1427828_at   | -0.21786018  | 3.418421566 | -2.564695432 | 0.029454336 | 0.029454336 | -3.311722339 |
| 1457351_at   | 0.19777621   | 6.224417499 | 2.564654561  | 0.029456348 | 0.029456348 | -3.311777174 |
| 1438100_at   | 0.28097828   | 4.162955439 | 2.564475676  | 0.029465159 | 0.029465159 | -3.312017178 |
| 1440530_at   | -0.232731    | 4.533089003 | -2.56442832  | 0.029467492 | 0.029467492 | -3.312080714 |
| 1458069_at   | 0.170368136  | 6.657936045 | 2.564180341  | 0.029479711 | 0.029479711 | -3.312413419 |
| 1416201_at   | 0.169161372  | 10.17312629 | 2.562965429  | 0.029539649 | 0.029539649 | -3.314043417 |
| 1416518_at   | -0.342693268 | 4.529100415 | -2.562604159 | 0.029557496 | 0.029557496 | -3.314528116 |

|              |              |             |              |             |             |              |
|--------------|--------------|-------------|--------------|-------------|-------------|--------------|
| 1443635_at   | -0.196531919 | 4.078253493 | -2.562067906 | 0.029584007 | 0.029584007 | -3.315247579 |
| 1419523_at   | 0.174271629  | 3.392934308 | 2.561771086  | 0.029598691 | 0.029598691 | -3.315645806 |
| 1444468_at   | 0.194208856  | 6.432094353 | 2.561273622  | 0.029623318 | 0.029623318 | -3.316313225 |
| 1421156_a_at | 0.317222589  | 8.170407922 | 2.561185674  | 0.029627674 | 0.029627674 | -3.31643122  |
| 1420496_at   | -0.185293536 | 4.758009815 | -2.560952115 | 0.029639245 | 0.029639245 | -3.316744571 |
| 1428812_at   | -0.817004938 | 5.601155827 | -2.559474622 | 0.029712547 | 0.029712547 | -3.318726821 |
| 1457406_at   | -0.175088923 | 4.188920755 | -2.559132398 | 0.029729552 | 0.029729552 | -3.319185956 |
| 1459232_at   | -0.238351753 | 5.719857721 | -2.558774289 | 0.029747356 | 0.029747356 | -3.319666402 |
| 1424893_at   | 1.124980901  | 6.838840834 | 2.557863007  | 0.029792711 | 0.029792711 | -3.320888989 |
| 1453049_at   | 0.172045115  | 5.120325028 | 2.557629211  | 0.029804358 | 0.029804358 | -3.32120265  |
| 1454722_at   | 0.161746271  | 10.21609089 | 2.556804878  | 0.02984546  | 0.02984546  | -3.322308577 |
| 1433728_at   | 0.205329742  | 5.685872987 | 2.556740983  | 0.029848648 | 0.029848648 | -3.322394299 |
| 1450236_at   | 0.190459247  | 4.373520843 | 2.556569769  | 0.029857193 | 0.029857193 | -3.322623999 |
| 1420989_at   | 0.319163796  | 6.654767162 | 2.556428194  | 0.029864261 | 0.029864261 | -3.322813935 |
| 1447173_at   | -0.296749174 | 3.853161776 | -2.556306897 | 0.029870318 | 0.029870318 | -3.322976667 |
| 1439647_at   | 0.28275023   | 6.808943001 | 2.555140614  | 0.029928615 | 0.029928615 | -3.324541336 |
| 1435796_at   | -0.16323407  | 7.015670524 | -2.554905096 | 0.029940402 | 0.029940402 | -3.324857301 |
| 1460059_at   | -0.22070374  | 4.27964762  | -2.554730167 | 0.029949159 | 0.029949159 | -3.325091983 |
| 1420512_at   | 0.188770189  | 9.333359243 | 2.554352905  | 0.029968054 | 0.029968054 | -3.325598107 |
| 1429920_at   | -0.165557859 | 5.917961423 | -2.553867186 | 0.029992398 | 0.029992398 | -3.326249733 |
| 1434381_at   | -0.237491516 | 5.971167549 | -2.553660843 | 0.030002746 | 0.030002746 | -3.326526556 |
| 1425088_at   | -0.182457492 | 6.528367413 | -2.552921845 | 0.030039836 | 0.030039836 | -3.327517967 |
| 1443994_at   | -0.190287449 | 3.33041829  | -2.552620246 | 0.030054986 | 0.030054986 | -3.327922579 |
| 1434379_at   | -0.203858012 | 8.411586389 | -2.552392375 | 0.030066438 | 0.030066438 | -3.328228279 |
| 1426959_at   | -0.306641505 | 5.095287095 | -2.551900157 | 0.030091189 | 0.030091189 | -3.328888614 |
| 1422303_a_at | 0.235812378  | 5.185438047 | 2.551077062  | 0.030132624 | 0.030132624 | -3.329992829 |
| 1447143_at   | 0.315396733  | 7.980416166 | 2.550948921  | 0.03013908  | 0.03013908  | -3.330164734 |
| 1442074_at   | -0.325394252 | 3.621687314 | -2.550330189 | 0.030170271 | 0.030170271 | -3.330994782 |
| 1418796_at   | -0.223688422 | 9.268029154 | -2.550207282 | 0.030176471 | 0.030176471 | -3.331159666 |
| 1416416_x_at | 0.274795038  | 7.868392585 | 2.549792724  | 0.030197392 | 0.030197392 | -3.331715805 |
| 1420511_at   | -0.193268395 | 3.666691322 | -2.549412476 | 0.030216594 | 0.030216594 | -3.332225915 |
| 1417489_at   | -0.240307957 | 3.848366324 | -2.549098087 | 0.030232479 | 0.030232479 | -3.332647672 |
| 1449223_at   | -0.208588724 | 4.741658172 | -2.548431003 | 0.030266214 | 0.030266214 | -3.333542572 |
| 1433501_at   | 0.244664928  | 8.499595108 | 2.548080893  | 0.030283934 | 0.030283934 | -3.334012245 |
| 1427670_a_at | 0.202968703  | 10.85294242 | 2.547816118  | 0.030297341 | 0.030297341 | -3.33436744  |
| 1425284_a_at | 0.39715451   | 3.7751709   | 2.547472492  | 0.030314751 | 0.030314751 | -3.334828412 |
| 1441782_at   | -0.216592703 | 4.851154468 | -2.54683509  | 0.030347071 | 0.030347071 | -3.33568348  |
| 1427044_a_at | 0.353129872  | 5.950722594 | 2.546282973  | 0.030375094 | 0.030375094 | -3.336424134 |
| 1435477_s_at | 0.70536327   | 6.263597638 | 2.546274877  | 0.030375505 | 0.030375505 | -3.336434995 |
| 1460307_at   | -0.17959312  | 6.048060534 | -2.546223812 | 0.030378098 | 0.030378098 | -3.336503498 |
| 1435579_at   | 0.760602203  | 7.878588664 | 2.54616342   | 0.030381165 | 0.030381165 | -3.336584512 |
| 1457166_at   | 0.263240931  | 5.925782212 | 2.546084087  | 0.030385195 | 0.030385195 | -3.336690935 |
| 1457666_s_at | 0.691942678  | 6.695797732 | 2.54522149   | 0.030429043 | 0.030429043 | -3.337848083 |
| 1421543_at   | -0.20406389  | 4.193235872 | -2.544529079 | 0.030464286 | 0.030464286 | -3.338776924 |
| 1451804_a_at | -0.193577556 | 8.574288623 | -2.544420586 | 0.030469811 | 0.030469811 | -3.338922462 |
| 1451690_a_at | 0.247669338  | 5.250180142 | 2.543713203  | 0.030505865 | 0.030505865 | -3.33987138  |
| 1443166_at   | 0.300979365  | 7.332114417 | 2.540311393  | 0.030679841 | 0.030679841 | -3.344434639 |
| 1443845_x_at | -0.206813338 | 3.555658292 | -2.539768443 | 0.0307077   | 0.0307077   | -3.345162948 |
| 1451769_s_at | 0.206833297  | 4.560468479 | 2.537818994  | 0.030807935 | 0.030807935 | -3.347777889 |
| 1425039_at   | -0.401765009 | 6.010034819 | -2.537382419 | 0.030830427 | 0.030830427 | -3.348363492 |
| 1452611_at   | 0.192745791  | 7.060987424 | 2.536984775  | 0.030850928 | 0.030850928 | -3.348896871 |
| 1444690_at   | -0.267322974 | 5.620388587 | -2.535768636 | 0.030913711 | 0.030913711 | -3.350528125 |
| 1420076_at   | 0.222199902  | 3.332418861 | 2.535413298  | 0.030932079 | 0.030932079 | -3.351004749 |

|              |              |             |              |             |             |              |
|--------------|--------------|-------------|--------------|-------------|-------------|--------------|
| 1452380_at   | 0.387401614  | 5.463124131 | 2.535353027  | 0.030935196 | 0.030935196 | -3.351085592 |
| 1431384_at   | -0.29725518  | 6.047589093 | -2.535082049 | 0.030949212 | 0.030949212 | -3.351449059 |
| 1456761_at   | 0.218622903  | 5.483276192 | 2.534649053  | 0.030971621 | 0.030971621 | -3.352029844 |
| 1421144_at   | 0.463596337  | 8.714985694 | 2.534492107  | 0.030979748 | 0.030979748 | -3.352240357 |
| 1442664_at   | 0.267687394  | 5.617826802 | 2.534484406  | 0.030980147 | 0.030980147 | -3.352250686 |
| 1444510_at   | -0.180048376 | 4.06010229  | -2.534405757 | 0.03098422  | 0.03098422  | -3.352356179 |
| 1422227_at   | -0.182605361 | 4.98170618  | -2.534336925 | 0.030987786 | 0.030987786 | -3.352448503 |
| 1439202_at   | -0.221297541 | 4.680006156 | -2.533929633 | 0.031008891 | 0.031008891 | -3.352994806 |
| 1431892_a_at | 0.269727882  | 6.765651559 | 2.533631106  | 0.031024369 | 0.031024369 | -3.353395219 |
| 1442265_at   | -0.181097696 | 6.070826981 | -2.53331356  | 0.031040842 | 0.031040842 | -3.35382114  |
| 1457175_at   | -0.209154427 | 5.834487209 | -2.532770027 | 0.031069058 | 0.031069058 | -3.354550173 |
| 1428986_at   | 0.170954985  | 4.654817661 | 2.531775656  | 0.031120744 | 0.031120744 | -3.355883895 |
| 1430870_at   | -0.203918036 | 4.312724979 | -2.53141952  | 0.031139276 | 0.031139276 | -3.356361567 |
| 1456935_at   | -0.246274988 | 8.507963882 | -2.531412073 | 0.031139664 | 0.031139664 | -3.356371556 |
| 1443684_at   | -0.203441044 | 5.363403638 | -2.531175504 | 0.031151981 | 0.031151981 | -3.356688854 |
| 1445851_at   | 0.15543918   | 4.490679238 | 2.531086415  | 0.03115662  | 0.03115662  | -3.356808345 |
| 1426955_at   | 0.23975836   | 9.381901464 | 2.530927468  | 0.0311649   | 0.0311649   | -3.357021534 |
| 1456478_at   | 0.19243252   | 7.084053984 | 2.53082875   | 0.031170043 | 0.031170043 | -3.357153939 |
| 1427329_a_at | -0.217937936 | 5.30195867  | -2.530280834 | 0.031198604 | 0.031198604 | -3.357888828 |
| 1418903_at   | -0.220058815 | 5.575295606 | -2.529974169 | 0.031214602 | 0.031214602 | -3.358300138 |
| 1424395_at   | -0.2610719   | 6.652134686 | -2.529517988 | 0.031238413 | 0.031238413 | -3.358911981 |
| 1424997_at   | 0.21451909   | 6.99740679  | 2.529306249  | 0.031249472 | 0.031249472 | -3.359195971 |
| 1440989_at   | -0.238696437 | 5.189249645 | -2.528976551 | 0.031266699 | 0.031266699 | -3.359638169 |
| 1441001_at   | 0.5417646    | 6.65876784  | 2.527909167  | 0.031322535 | 0.031322535 | -3.361069751 |
| 1456489_at   | 0.326516273  | 7.140608937 | 2.527367206  | 0.031350924 | 0.031350924 | -3.361796626 |
| 1430034_at   | 0.242069815  | 6.826980567 | 2.526214991  | 0.031411364 | 0.031411364 | -3.363341951 |
| 1423306_at   | 0.223449888  | 7.86698272  | 2.525689444  | 0.031438971 | 0.031438971 | -3.364046795 |
| 1438344_at   | 0.208570111  | 3.260022018 | 2.525665068  | 0.031440252 | 0.031440252 | -3.364079486 |
| 1436664_a_at | -0.206410277 | 7.317155704 | -2.52530121  | 0.03145938  | 0.03145938  | -3.364567476 |
| 1458657_at   | -0.207264999 | 5.050527399 | -2.525170176 | 0.031466271 | 0.031466271 | -3.364743212 |
| 1430537_at   | 0.319835189  | 4.868365794 | 2.525117741  | 0.031469029 | 0.031469029 | -3.364813535 |
| 1446205_at   | 0.427512954  | 6.688043438 | 2.524906768  | 0.031480128 | 0.031480128 | -3.36509648  |
| 1423959_at   | -0.264468786 | 4.537668549 | -2.524573652 | 0.031497662 | 0.031497662 | -3.365543236 |
| 1446668_at   | -0.165180923 | 4.075576359 | -2.524318032 | 0.031511123 | 0.031511123 | -3.365886057 |
| 1437094_x_at | -0.40213672  | 5.387694625 | -2.524130711 | 0.031520991 | 0.031520991 | -3.366137278 |
| 1455112_at   | -0.191086918 | 6.414682117 | -2.523602866 | 0.031548815 | 0.031548815 | -3.366845184 |
| 1419834_x_at | 0.179866212  | 8.870032065 | 2.523397105  | 0.031559667 | 0.031559667 | -3.367121134 |
| 1424909_at   | -0.329397329 | 6.47012329  | -2.522534116 | 0.031605225 | 0.031605225 | -3.368278494 |
| 1429881_at   | -0.1721461   | 4.834101087 | -2.522311817 | 0.031616971 | 0.031616971 | -3.368576618 |
| 1436552_at   | 0.234590725  | 4.811979417 | 2.52214105   | 0.031625997 | 0.031625997 | -3.368805633 |
| 1432753_at   | -0.236528241 | 3.761202709 | -2.521756795 | 0.031646317 | 0.031646317 | -3.369320953 |
| 1438667_at   | -0.306953064 | 5.952820007 | -2.52062549  | 0.031706216 | 0.031706216 | -3.370838114 |
| 1445773_at   | 0.85354532   | 5.852249091 | 2.520309142  | 0.031722986 | 0.031722986 | -3.371262355 |
| 1459949_at   | 0.334130319  | 5.223418018 | 2.520305012  | 0.031723205 | 0.031723205 | -3.371267894 |
| 1439542_at   | -0.17967111  | 7.199607079 | -2.520227208 | 0.03172733  | 0.03172733  | -3.371372234 |
| 1452238_at   | 0.175661714  | 6.74053663  | 2.519831547  | 0.03174832  | 0.03174832  | -3.371902834 |
| 1453188_at   | 0.21279022   | 7.005294431 | 2.518925186  | 0.031796454 | 0.031796454 | -3.373118298 |
| 1422750_a_at | -0.663723337 | 6.471306836 | -2.518794402 | 0.031803405 | 0.031803405 | -3.373293684 |
| 1450207_at   | -0.229565689 | 5.296240457 | -2.518420115 | 0.031823308 | 0.031823308 | -3.373795609 |
| 1440721_at   | -0.186208182 | 8.038179959 | -2.518287038 | 0.031830388 | 0.031830388 | -3.373974068 |
| 1425654_a_at | 0.153994814  | 7.811142909 | 2.517834155  | 0.031854492 | 0.031854492 | -3.374581389 |
| 1446402_at   | 0.163894574  | 3.456333712 | 2.517807038  | 0.031855935 | 0.031855935 | -3.374617753 |
| 1420941_at   | 0.233669758  | 6.793799663 | 2.517764267  | 0.031858213 | 0.031858213 | -3.374675109 |



|              |              |             |              |             |             |              |
|--------------|--------------|-------------|--------------|-------------|-------------|--------------|
| 1439359_x_at | -0.159009446 | 4.316766269 | -2.517311944 | 0.031882308 | 0.031882308 | -3.375281674 |
| 1435962_at   | -0.157574419 | 4.368337672 | -2.517201682 | 0.031888184 | 0.031888184 | -3.375429534 |
| 1416966_at   | -0.198190722 | 3.795788467 | -2.517092258 | 0.031894017 | 0.031894017 | -3.375576271 |
| 1451798_at   | 0.195044451  | 4.248148728 | 2.516599989  | 0.03192027  | 0.03192027  | -3.376236396 |
| 1434200_at   | -0.177242786 | 7.161087932 | -2.515920501 | 0.031956543 | 0.031956543 | -3.377147571 |
| 1432304_a_at | -0.181282779 | 6.585935459 | -2.515392802 | 0.031984742 | 0.031984742 | -3.377855195 |
| 1441793_at   | 0.160916123  | 3.764673661 | 2.514470442  | 0.032034089 | 0.032034089 | -3.379092029 |
| 1417374_at   | 0.209098257  | 7.542831485 | 2.513452804  | 0.032088622 | 0.032088622 | -3.380456604 |
| 1426519_at   | -0.307422856 | 8.476133685 | -2.513345097 | 0.032094399 | 0.032094399 | -3.38060103  |
| 1455262_at   | -0.218800619 | 9.053319702 | -2.513059493 | 0.032109724 | 0.032109724 | -3.380984    |
| 1441561_at   | 0.330553351  | 5.680636248 | 2.511808277  | 0.032176944 | 0.032176944 | -3.382661744 |
| 1438751_at   | -0.26409747  | 3.671260688 | -2.5108759   | 0.032227126 | 0.032227126 | -3.383911936 |
| 1455741_a_at | 0.267767488  | 9.380800422 | 2.5106649    | 0.032238493 | 0.032238493 | -3.384194858 |
| 1425810_a_at | 0.238419971  | 8.561468289 | 2.510394885  | 0.032253045 | 0.032253045 | -3.384556907 |
| 1416114_at   | 0.171255538  | 9.703009197 | 2.508737071  | 0.032342535 | 0.032342535 | -3.386779748 |
| 1444500_at   | 0.203514288  | 6.476354077 | 2.508681595  | 0.032345534 | 0.032345534 | -3.386854131 |
| 1441168_at   | -0.252819079 | 3.824271499 | -2.50868089  | 0.032345572 | 0.032345572 | -3.386855076 |
| 1419326_at   | -0.344661449 | 4.614089918 | -2.508073204 | 0.032378441 | 0.032378441 | -3.387669862 |
| 1458861_at   | -0.222790634 | 4.916844614 | -2.508039099 | 0.032380286 | 0.032380286 | -3.387715589 |
| 1442061_at   | 0.199310844  | 7.60951616  | 2.506253931  | 0.03247704  | 0.03247704  | -3.390109092 |
| 1430435_at   | 0.187946045  | 7.959382448 | 2.506120584  | 0.032484278 | 0.032484278 | -3.390287876 |
| 1451384_at   | -0.233294301 | 5.7980699   | -2.505975262 | 0.032492169 | 0.032492169 | -3.390482716 |
| 1459761_x_at | -0.213164614 | 3.594988649 | -2.505786547 | 0.032502419 | 0.032502419 | -3.390735734 |
| 1425014_at   | 0.237420232  | 6.9802573   | 2.505397442  | 0.032523562 | 0.032523562 | -3.391257421 |
| 1442336_at   | 0.239860352  | 5.130173244 | 2.505023913  | 0.032543872 | 0.032543872 | -3.391758222 |
| 1419615_at   | -0.162569531 | 5.061653356 | -2.50479891  | 0.032556112 | 0.032556112 | -3.392059887 |
| 1457876_at   | 0.164404639  | 3.604906332 | 2.504721409  | 0.032560329 | 0.032560329 | -3.392163794 |
| 1439893_at   | -0.26110524  | 4.255076192 | -2.504539443 | 0.032570233 | 0.032570233 | -3.392407757 |
| 1443452_at   | -0.176352824 | 6.795335885 | -2.504520058 | 0.032571288 | 0.032571288 | -3.392433747 |
| 1435412_at   | -0.237103343 | 4.122352256 | -2.504503663 | 0.032572181 | 0.032572181 | -3.392455728 |
| 1418990_at   | -0.208154248 | 3.191338884 | -2.504490514 | 0.032572896 | 0.032572896 | -3.392473357 |
| 1425468_at   | 0.275233284  | 5.528573864 | 2.50407877   | 0.032595319 | 0.032595319 | -3.393025383 |
| 1443129_at   | -0.231067909 | 4.010206643 | -2.504004351 | 0.032599373 | 0.032599373 | -3.393125157 |
| 1459142_at   | -0.349570462 | 4.323244843 | -2.503885314 | 0.032605859 | 0.032605859 | -3.393284749 |
| 1429127_at   | 0.182210129  | 8.027769504 | 2.503847705  | 0.032607908 | 0.032607908 | -3.393335171 |
| 1454579_at   | -0.234950645 | 4.388091506 | -2.503197997 | 0.032643334 | 0.032643334 | -3.394206225 |
| 1424599_at   | -0.278339078 | 4.304637676 | -2.502779665 | 0.032666164 | 0.032666164 | -3.394767072 |
| 1459456_at   | -0.23534258  | 5.566700764 | -2.502586554 | 0.032676709 | 0.032676709 | -3.395025968 |
| 1427103_at   | -0.204601612 | 6.541481332 | -2.502109045 | 0.032702796 | 0.032702796 | -3.395666143 |
| 1445495_at   | -0.221073762 | 4.216317374 | -2.501438268 | 0.032739477 | 0.032739477 | -3.396565415 |
| 1449794_x_at | -0.211482927 | 5.093530985 | -2.501245074 | 0.03275005  | 0.03275005  | -3.396824418 |
| 1428430_at   | -0.210297141 | 6.160845508 | -2.500908998 | 0.032768449 | 0.032768449 | -3.397274969 |
| 1430517_at   | -0.187146832 | 3.996996071 | -2.500721635 | 0.032778711 | 0.032778711 | -3.397526152 |
| 1415909_at   | -0.188010803 | 9.381369445 | -2.500476077 | 0.032792166 | 0.032792166 | -3.39785535  |
| 1441891_x_at | 0.231043276  | 5.171844193 | 2.499629107  | 0.032838615 | 0.032838615 | -3.398990797 |
| 1433884_at   | 0.189733325  | 6.262131713 | 2.499362851  | 0.03285323  | 0.03285323  | -3.399347735 |
| 1422601_at   | -0.200754583 | 6.987540614 | -2.499318189 | 0.032855682 | 0.032855682 | -3.399407609 |
| 1442201_at   | 0.385833406  | 5.056895239 | 2.498733695  | 0.032887791 | 0.032887791 | -3.400191165 |
| 1455998_at   | 0.278824323  | 7.618540098 | 2.498243918  | 0.032914721 | 0.032914721 | -3.40084774  |
| 1440251_s_at | 0.272570632  | 5.131615939 | 2.497195608  | 0.032972435 | 0.032972435 | -3.40225304  |
| 1419095_a_at | -0.232674154 | 4.347807593 | -2.497097588 | 0.032977836 | 0.032977836 | -3.402384438 |
| 1459428_at   | 0.226409448  | 3.953916588 | 2.497092759  | 0.032978103 | 0.032978103 | -3.402390911 |
| 1434070_at   | 0.242094999  | 9.939348522 | 2.497019899  | 0.032982118 | 0.032982118 | -3.402488582 |

|                   |              |             |              |             |             |              |
|-------------------|--------------|-------------|--------------|-------------|-------------|--------------|
| 1436833_x_at      | 0.286633896  | 7.796659618 | 2.495744144  | 0.03305251  | 0.03305251  | -3.404198736 |
| 1424778_at        | 0.25526426   | 9.38908839  | 2.495687016  | 0.033055666 | 0.033055666 | -3.404275315 |
| 1417754_at        | 0.177786179  | 7.631563576 | 2.49568573   | 0.033055737 | 0.033055737 | -3.404277039 |
| 1417244_a_at      | -0.162367623 | 4.419468727 | -2.495135878 | 0.033086125 | 0.033086125 | -3.405014104 |
| 1425215_at        | 0.187962088  | 4.617862273 | 2.495000023  | 0.033093637 | 0.033093637 | -3.405196214 |
| 1447858_x_at      | -0.181821334 | 5.27310705  | -2.494799306 | 0.033104739 | 0.033104739 | -3.405465268 |
| 1430626_at        | -0.173683802 | 4.917220191 | -2.494560207 | 0.033117969 | 0.033117969 | -3.40578577  |
| 1458322_x_at      | -0.236712021 | 5.834672034 | -2.494389243 | 0.033127432 | 0.033127432 | -3.406014939 |
| 1432906_at        | 0.218207366  | 3.94117929  | 2.494347368  | 0.033129751 | 0.033129751 | -3.406071072 |
| 1445868_at        | -0.166475172 | 5.471831062 | -2.493584336 | 0.033172022 | 0.033172022 | -3.407093869 |
| 1427884_at        | -0.16252106  | 11.38740755 | -2.493421976 | 0.033181023 | 0.033181023 | -3.4073115   |
| 1441128_at        | 0.275637793  | 4.81899782  | 2.493321904  | 0.033186572 | 0.033186572 | -3.407445639 |
| 1422748_at        | 0.337853702  | 9.450756025 | 2.492400075  | 0.033237734 | 0.033237734 | -3.408681268 |
| 1426078_a_at      | -0.172911557 | 8.311621201 | -2.492296058 | 0.033243512 | 0.033243512 | -3.408820692 |
| 1450652_at        | -0.216245575 | 9.617920915 | -2.492060949 | 0.033256575 | 0.033256575 | -3.40913583  |
| 1455504_a_at      | 0.174013485  | 7.891072909 | 2.49152682   | 0.033286272 | 0.033286272 | -3.409851765 |
| 1446061_at        | -0.239152633 | 3.605083505 | -2.491366185 | 0.033295208 | 0.033295208 | -3.410067076 |
| 1436589_x_at      | 0.15170686   | 6.972090215 | 2.491230002  | 0.033302786 | 0.033302786 | -3.410249611 |
| 1430352_at        | -0.186471428 | 7.640391962 | -2.491182931 | 0.033305406 | 0.033305406 | -3.410312703 |
| 1427418_a_at      | 0.178386122  | 11.08661343 | 2.490981024  | 0.033316645 | 0.033316645 | -3.410583332 |
| 1432083_a_at      | -0.784392993 | 8.260201094 | -2.490276113 | 0.033355913 | 0.033355913 | -3.411528158 |
| 1449778_at        | 0.200814043  | 3.147255172 | 2.490213419  | 0.033359408 | 0.033359408 | -3.411612189 |
| 1419816_s_at      | 0.164928741  | 8.158808835 | 2.490192546  | 0.033360571 | 0.033360571 | -3.411640166 |
| 1440105_at        | -0.28231525  | 4.047387428 | -2.490158492 | 0.03336247  | 0.03336247  | -3.41168581  |
| 1420569_at        | -0.287003902 | 5.231620793 | -2.489960807 | 0.033373492 | 0.033373492 | -3.411950773 |
| 1424719_a_at      | 0.851386002  | 5.33124826  | 2.489585352  | 0.033394437 | 0.033394437 | -3.412454004 |
| 1456439_x_at      | 0.247105023  | 7.55422042  | 2.489397893  | 0.0334049   | 0.0334049   | -3.412705258 |
| 1422473_at        | 0.200919471  | 6.326137496 | 2.488703203  | 0.0334437   | 0.0334437   | -3.413636355 |
| 1420034_at        | -0.318760017 | 5.657389207 | -2.488588111 | 0.033450132 | 0.033450132 | -3.413790611 |
| 1441183_at        | 0.188962372  | 6.061262456 | 2.488174791  | 0.033473243 | 0.033473243 | -3.414344577 |
| 1435515_at        | 0.221873206  | 4.388272108 | 2.487073289  | 0.033534911 | 0.033534911 | -3.41582088  |
| 1433917_x_at      | -0.228672795 | 6.765099399 | -2.486685646 | 0.03355664  | 0.03355664  | -3.416340415 |
| 1457299_at        | -0.216518157 | 6.58360096  | -2.486423301 | 0.033571353 | 0.033571353 | -3.416692018 |
| 1456256_at        | 0.186316701  | 8.129974884 | 2.486263835  | 0.0335803   | 0.0335803   | -3.416905738 |
| 1436237_at        | 0.229396661  | 5.264190412 | 2.485899134  | 0.03360077  | 0.03360077  | -3.417394517 |
| 1435084_at        | 0.213071797  | 6.50422181  | 2.485527632  | 0.033621634 | 0.033621634 | -3.417892407 |
| 1420025_s_at      | 0.217338154  | 6.332381625 | 2.485233955  | 0.033638137 | 0.033638137 | -3.418285992 |
| 1451931_x_at      | -0.510995435 | 8.12173183  | -2.485108016 | 0.033645217 | 0.033645217 | -3.418454774 |
| 1418337_at        | 0.159773657  | 9.001161786 | 2.485055655  | 0.03364816  | 0.03364816  | -3.418524947 |
| 1433600_at        | 0.171543326  | 7.206752405 | 2.485000231  | 0.033651277 | 0.033651277 | -3.418599226 |
| 1437065_at        | -0.238145369 | 6.225667759 | -2.484935101 | 0.033654939 | 0.033654939 | -3.418686513 |
| 1422052_at        | -0.223676641 | 5.091580839 | -2.484779096 | 0.033663713 | 0.033663713 | -3.418895587 |
| 1443394_at        | 0.345056653  | 7.658901128 | 2.48466097   | 0.033670358 | 0.033670358 | -3.419053898 |
| 1435290_x_at      | 0.472621966  | 6.216634627 | 2.484290741  | 0.033691194 | 0.033691194 | -3.419550067 |
| 1426451_at        | 0.178519645  | 8.550368017 | 2.484209177  | 0.033695786 | 0.033695786 | -3.419659376 |
| 1424382_at        | -0.199273889 | 10.90554258 | -2.484124102 | 0.033700577 | 0.033700577 | -3.419773391 |
| 1438474_at        | -0.295409157 | 4.105706749 | -2.484008312 | 0.033707097 | 0.033707097 | -3.419928568 |
| 1424906_at        | 0.214617882  | 6.409491904 | 2.483940993  | 0.033710889 | 0.033710889 | -3.420018786 |
| 1418253_a_at      | -0.547299501 | 7.850921891 | -2.483702977 | 0.033724299 | 0.033724299 | -3.420337764 |
| 1429961_at        | -0.179707924 | 5.920748916 | -2.482399151 | 0.033797849 | 0.033797849 | -3.422085057 |
| 1434482_at        | 0.242823072  | 8.165863986 | 2.482337123  | 0.033801353 | 0.033801353 | -3.422168182 |
| 1453412_a_at      | -0.188973727 | 9.204553733 | -2.482313754 | 0.033802672 | 0.033802672 | -3.422199499 |
| AFFX-r2-Bs-dap-M_ | 0.269220436  | 8.159075812 | 2.482174777  | 0.033810523 | 0.033810523 | -3.422385742 |

|              |              |             |              |             |             |              |
|--------------|--------------|-------------|--------------|-------------|-------------|--------------|
| 1422430_at   | -0.274745978 | 9.290788741 | -2.481802671 | 0.033831551 | 0.033831551 | -3.4228844   |
| 1416038_at   | -0.207206043 | 9.751898324 | -2.481328329 | 0.033858375 | 0.033858375 | -3.423520058 |
| 1449990_at   | -0.154005635 | 3.871449415 | -2.481320185 | 0.033858836 | 0.033858836 | -3.423530971 |
| 1459921_at   | 0.408652216  | 7.048959082 | 2.481250252  | 0.033862793 | 0.033862793 | -3.423624687 |
| 1421589_at   | -0.211515001 | 5.299707013 | -2.481213422 | 0.033864876 | 0.033864876 | -3.423674041 |
| 1422182_at   | -0.188965091 | 3.32072061  | -2.481177178 | 0.033866927 | 0.033866927 | -3.423722611 |
| 1445553_at   | -0.17545659  | 4.908459338 | -2.480209836 | 0.03392171  | 0.03392171  | -3.425018904 |
| 1443413_s_at | -0.247860792 | 5.749454885 | -2.479823189 | 0.033943632 | 0.033943632 | -3.425537024 |
| 1433788_at   | 0.213453211  | 3.759354263 | 2.479397038  | 0.033967809 | 0.033967809 | -3.426108076 |
| 1457614_at   | 0.500841962  | 4.708282084 | 2.47902185   | 0.033989109 | 0.033989109 | -3.426610832 |
| 1457931_at   | -0.164003573 | 3.58731498  | -2.47853085  | 0.034017004 | 0.034017004 | -3.427268772 |
| 1434947_at   | 0.232357721  | 6.113102107 | 2.478301841  | 0.034030023 | 0.034030023 | -3.427575641 |
| 1434918_at   | 0.195725866  | 9.050678718 | 2.478172861  | 0.034037357 | 0.034037357 | -3.427748472 |
| 1415978_at   | 0.960888529  | 6.609084545 | 2.477620107  | 0.034068807 | 0.034068807 | -3.428489145 |
| 1420268_x_at | 0.197588066  | 3.466270438 | 2.476938116  | 0.034107649 | 0.034107649 | -3.429402978 |
| 1449046_a_at | -0.231153392 | 7.982777019 | -2.475142858 | 0.034210106 | 0.034210106 | -3.431808464 |
| 1445065_at   | 0.172812346  | 4.725719231 | 2.474975716  | 0.034219661 | 0.034219661 | -3.432032413 |
| 1421594_a_at | -0.416830521 | 6.712243434 | -2.474266178 | 0.03426025  | 0.03426025  | -3.432983098 |
| 1425111_at   | -0.227022081 | 5.585441804 | -2.474099866 | 0.034269771 | 0.034269771 | -3.433205932 |
| 1422861_s_at | 0.208530688  | 4.564517167 | 2.473389778  | 0.034310452 | 0.034310452 | -3.434157333 |
| 1424650_at   | -0.217624047 | 8.978782369 | -2.47338527  | 0.03431071  | 0.03431071  | -3.434163373 |
| 1425310_a_at | 0.319545746  | 10.24358423 | 2.473368233  | 0.034311687 | 0.034311687 | -3.4341862   |
| 1433831_at   | 0.367303927  | 7.491789744 | 2.47293857   | 0.034336326 | 0.034336326 | -3.43476187  |
| 1444883_at   | 0.202336046  | 5.462527175 | 2.472207713  | 0.034378277 | 0.034378277 | -3.43574107  |
| 1455817_x_at | 0.191075022  | 5.476329166 | 2.47204283   | 0.034387748 | 0.034387748 | -3.435961977 |
| 1458103_at   | 0.220039918  | 4.083845236 | 2.471682775  | 0.03440844  | 0.03440844  | -3.43644437  |
| 1427243_at   | 0.194912248  | 8.990284902 | 2.4712395    | 0.034433931 | 0.034433931 | -3.437038253 |
| 1422004_at   | -0.196249908 | 3.793346838 | -2.471185761 | 0.034437023 | 0.034437023 | -3.43711025  |
| 1452185_at   | 0.198964487  | 5.932444466 | 2.470763966  | 0.034461298 | 0.034461298 | -3.437675347 |
| 1419074_at   | 0.22807525   | 6.897840419 | 2.470416848  | 0.034481288 | 0.034481288 | -3.438140392 |
| 1429936_at   | -0.428556625 | 5.205879948 | -2.47007099  | 0.034501217 | 0.034501217 | -3.438603745 |
| 1457045_at   | 0.330072665  | 3.737793615 | 2.469246437  | 0.034548776 | 0.034548776 | -3.439708399 |
| 1453074_at   | -0.288200633 | 5.414579427 | -2.468746212 | 0.03457766  | 0.03457766  | -3.44037854  |
| 1430363_at   | -0.1745249   | 6.433122945 | -2.468691212 | 0.034580837 | 0.034580837 | -3.440452222 |
| 1460227_at   | -0.273916119 | 8.849027961 | -2.468623508 | 0.034584749 | 0.034584749 | -3.440542923 |
| 1449837_at   | 0.196335444  | 3.323641656 | 2.468594025  | 0.034586452 | 0.034586452 | -3.440582419 |
| 1422520_at   | 0.612554484  | 7.104332188 | 2.468548615  | 0.034589076 | 0.034589076 | -3.440643254 |
| 1454309_at   | 0.217433723  | 4.68171813  | 2.468319096  | 0.034602341 | 0.034602341 | -3.440950731 |
| 1426785_s_at | -0.170357154 | 6.83630635  | -2.468115268 | 0.034614126 | 0.034614126 | -3.44122379  |
| 1455379_at   | -0.502975973 | 6.365178555 | -2.467958355 | 0.034623201 | 0.034623201 | -3.441433997 |
| 1423560_at   | -0.246093777 | 5.995844332 | -2.467919511 | 0.034625448 | 0.034625448 | -3.441486034 |
| 1446336_at   | -0.214255484 | 3.972183019 | -2.466850294 | 0.034687351 | 0.034687351 | -3.442918382 |
| 1442116_at   | -0.162907143 | 5.540931671 | -2.4666593   | 0.03469842  | 0.03469842  | -3.443174238 |
| 1453413_at   | 0.344553029  | 6.796695279 | 2.466569852  | 0.034703606 | 0.034703606 | -3.443294062 |
| 1435095_at   | 0.274862879  | 4.291043682 | 2.466306465  | 0.034718879 | 0.034718879 | -3.443646892 |
| 1457886_at   | 0.528374072  | 5.790941604 | 2.465127217  | 0.034787341 | 0.034787341 | -3.445226572 |
| 1420931_at   | 0.300109031  | 7.217067415 | 2.464682503  | 0.034813194 | 0.034813194 | -3.445822281 |
| 1440672_at   | -0.225972695 | 4.940012077 | -2.463664563 | 0.034872443 | 0.034872443 | -3.447185823 |
| 1416203_at   | 0.223029241  | 9.083847634 | 2.463469244  | 0.034883823 | 0.034883823 | -3.44744745  |
| 1431947_at   | 0.158744238  | 5.361771185 | 2.463440353  | 0.034885507 | 0.034885507 | -3.44748615  |
| 1427507_at   | -0.20161363  | 4.927984375 | -2.462714183 | 0.03492785  | 0.03492785  | -3.448458834 |
| 1418514_at   | 0.248239917  | 9.596956842 | 2.462561437  | 0.034936764 | 0.034936764 | -3.44866343  |
| 1447942_x_at | -0.189965575 | 4.227367977 | -2.462467472 | 0.034942248 | 0.034942248 | -3.448789292 |

|              |              |             |              |             |             |              |
|--------------|--------------|-------------|--------------|-------------|-------------|--------------|
| 1416919_a_at | -0.198231485 | 8.005333246 | -2.462432506 | 0.034944289 | 0.034944289 | -3.448836127 |
| 1444546_at   | -0.22086328  | 4.327699414 | -2.462066163 | 0.03496568  | 0.03496568  | -3.449326823 |
| 1431913_a_at | -0.15843916  | 4.668288642 | -2.461906245 | 0.034975022 | 0.034975022 | -3.449541022 |
| 1455342_at   | -0.199544025 | 5.381909439 | -2.461780481 | 0.03498237  | 0.03498237  | -3.449709474 |
| 1423007_a_at | -0.260672274 | 7.391819395 | -2.461413449 | 0.035003825 | 0.035003825 | -3.450201083 |
| 1420284_at   | -0.167273303 | 7.436209198 | -2.461008573 | 0.035027506 | 0.035027506 | -3.450743376 |
| 1439019_at   | -0.198286625 | 8.282018098 | -2.460869451 | 0.035035647 | 0.035035647 | -3.450929714 |
| 1436221_at   | -0.198749448 | 5.560315917 | -2.460575569 | 0.035052851 | 0.035052851 | -3.451323337 |
| 1425510_at   | 0.163550435  | 7.646318872 | 2.460527907  | 0.035055642 | 0.035055642 | -3.451387175 |
| 1439297_at   | -0.21074727  | 5.671499894 | -2.460069412 | 0.0350825   | 0.0350825   | -3.452001269 |
| 1431980_a_at | 0.155782893  | 6.448005525 | 2.459454544  | 0.035118551 | 0.035118551 | -3.452824794 |
| 1457874_at   | 0.18504625   | 3.55913803  | 2.4588045    | 0.035156704 | 0.035156704 | -3.453695416 |
| 1459119_at   | -0.186346925 | 5.811188404 | -2.458330195 | 0.035184568 | 0.035184568 | -3.454330657 |
| 1455220_at   | -0.260426268 | 7.214999992 | -2.458039639 | 0.035201649 | 0.035201649 | -3.454719796 |
| 1417687_at   | -0.1932698   | 4.988108934 | -2.456550804 | 0.035289299 | 0.035289299 | -3.456713734 |
| 1419728_at   | 0.362560805  | 5.994436178 | 2.456510551  | 0.035291672 | 0.035291672 | -3.456767643 |
| 1447614_at   | -0.165405976 | 3.38779371  | -2.456367855 | 0.035300084 | 0.035300084 | -3.456958744 |
| 1418624_at   | 0.168749215  | 12.32040897 | 2.45601368   | 0.035320973 | 0.035320973 | -3.457433062 |
| 1422739_at   | 0.207328168  | 6.766749478 | 2.455995139  | 0.035322067 | 0.035322067 | -3.457457892 |
| 1444661_at   | -0.217565727 | 4.939082246 | -2.455978189 | 0.035323067 | 0.035323067 | -3.457480592 |
| 1434346_at   | 0.225361332  | 4.518905795 | 2.455745278  | 0.035336812 | 0.035336812 | -3.457792508 |
| 1450383_at   | 0.252061618  | 6.398392255 | 2.455518839  | 0.035350179 | 0.035350179 | -3.458095755 |
| 1418801_at   | 0.183358434  | 9.228053957 | 2.455273369  | 0.035364676 | 0.035364676 | -3.458424485 |
| 1427239_at   | -0.243997972 | 6.720107978 | -2.454193455 | 0.035428522 | 0.035428522 | -3.459870667 |
| 1435494_s_at | 0.303406977  | 11.14897276 | 2.45389782   | 0.035446021 | 0.035446021 | -3.460266563 |
| 1439509_at   | -0.187733611 | 4.120103432 | -2.453639877 | 0.035461295 | 0.035461295 | -3.460611981 |
| 1419344_at   | -0.219956316 | 4.669701143 | -2.453403582 | 0.035475294 | 0.035475294 | -3.460928409 |
| 1449471_at   | 0.173176811  | 8.136255885 | 2.453235732  | 0.03548524  | 0.03548524  | -3.461153177 |
| 1452027_a_at | 0.270096768  | 5.299699878 | 2.4529532    | 0.03550199  | 0.03550199  | -3.461531517 |
| 1428989_at   | -0.315379078 | 7.562138517 | -2.452829387 | 0.035509332 | 0.035509332 | -3.461697313 |
| 1460611_at   | -0.222759814 | 4.354362311 | -2.452729895 | 0.035515233 | 0.035515233 | -3.461830542 |
| 1432879_at   | -0.205128332 | 3.530270493 | -2.451594364 | 0.035582654 | 0.035582654 | -3.463351092 |
| 1435529_at   | -0.638271927 | 5.440813798 | -2.451451422 | 0.03559115  | 0.03559115  | -3.463542497 |
| 1421374_a_at | -0.19396627  | 8.968804369 | -2.450480682 | 0.035648901 | 0.035648901 | -3.464842336 |
| 1449630_s_at | 0.186846524  | 7.738282599 | 2.450015431  | 0.035676613 | 0.035676613 | -3.465465303 |
| 1430091_at   | -0.195965652 | 3.915928617 | -2.449638169 | 0.035699099 | 0.035699099 | -3.465970446 |
| 1446177_at   | 0.193618799  | 3.6113366   | 2.449483127  | 0.035708344 | 0.035708344 | -3.466178041 |
| 1446711_at   | 0.299066703  | 4.440602048 | 2.449465932  | 0.035709369 | 0.035709369 | -3.466201065 |
| 1448021_at   | 0.272700195  | 7.668959647 | 2.448991688  | 0.035737664 | 0.035737664 | -3.466836053 |
| 1455136_at   | 0.164743649  | 3.714528364 | 2.448730886  | 0.035753234 | 0.035753234 | -3.467185251 |
| 1434595_at   | -0.225851194 | 5.639245517 | -2.447768752 | 0.03581073  | 0.03581073  | -3.468473461 |
| 1418400_at   | 0.16750681   | 6.874636727 | 2.44760837   | 0.035820324 | 0.035820324 | -3.468688196 |
| 1433649_at   | 0.202343542  | 7.419812355 | 2.447467148  | 0.035828773 | 0.035828773 | -3.468877274 |
| 1452606_at   | 0.177127941  | 5.183855854 | 2.447106566  | 0.035850356 | 0.035850356 | -3.469360048 |
| 1418666_at   | -0.312394811 | 8.590492312 | -2.446826418 | 0.035867133 | 0.035867133 | -3.469735127 |
| 1432109_at   | -0.176630624 | 4.167863497 | -2.446555229 | 0.035883381 | 0.035883381 | -3.470098208 |
| 1440314_at   | 0.359108534  | 7.613924362 | 2.446426062  | 0.035891122 | 0.035891122 | -3.470271142 |
| 1430781_at   | -0.687162994 | 6.802338981 | -2.446230221 | 0.035902863 | 0.035902863 | -3.47053334  |
| 1454335_at   | -0.169855414 | 3.24989924  | -2.444465744 | 0.036008815 | 0.036008815 | -3.47289561  |
| 1456073_s_at | -0.375774593 | 10.27704516 | -2.444365389 | 0.03601485  | 0.03601485  | -3.473029961 |
| 1429622_at   | -0.216780995 | 8.108212267 | -2.444291607 | 0.036019288 | 0.036019288 | -3.473128737 |
| 1449875_s_at | 0.304508191  | 7.314928941 | 2.443452669  | 0.036069787 | 0.036069787 | -3.474251851 |
| 1444724_at   | 0.274903027  | 6.022883931 | 2.44265169   | 0.036118066 | 0.036118066 | -3.475324121 |

|              |              |             |              |             |             |              |
|--------------|--------------|-------------|--------------|-------------|-------------|--------------|
| 1460566_at   | -0.212375867 | 7.095231934 | -2.442582833 | 0.036122219 | 0.036122219 | -3.475416298 |
| 1421433_at   | -0.220105432 | 9.457196356 | -2.442335771 | 0.036137126 | 0.036137126 | -3.475747034 |
| 1438842_at   | -0.324366108 | 5.170006209 | -2.442330815 | 0.036137425 | 0.036137425 | -3.475753668 |
| 1451516_at   | 0.17557735   | 7.50725969  | 2.442245199  | 0.036142592 | 0.036142592 | -3.47586828  |
| 1442959_at   | 0.223657581  | 6.252706723 | 2.441656677  | 0.03617813  | 0.03617813  | -3.476656107 |
| 1424448_at   | -0.278269121 | 4.282661621 | -2.441507119 | 0.036187167 | 0.036187167 | -3.476856311 |
| 1440952_at   | 0.177580757  | 6.291153585 | 2.441176368  | 0.036207159 | 0.036207159 | -3.477299064 |
| 1417152_at   | -0.207572655 | 5.971422756 | -2.440921158 | 0.036222593 | 0.036222593 | -3.477640691 |
| 1455851_at   | -0.445791146 | 7.265048133 | -2.440384242 | 0.036255085 | 0.036255085 | -3.478359407 |
| 1424877_a_at | -0.525090802 | 9.182840699 | -2.4401974   | 0.036266398 | 0.036266398 | -3.47860951  |
| 1450534_x_at | -0.199161499 | 4.485594573 | -2.440194657 | 0.036266564 | 0.036266564 | -3.478613182 |
| 1433289_at   | 0.316070514  | 5.893999849 | 2.439894352  | 0.036284755 | 0.036284755 | -3.479015161 |
| 1428523_at   | -0.311971997 | 6.342000411 | -2.439548284 | 0.03630573  | 0.03630573  | -3.479478394 |
| 1420380_at   | 0.223924976  | 5.520802335 | 2.439292235  | 0.036321256 | 0.036321256 | -3.479821128 |
| 1452368_at   | 0.19004938   | 8.028708091 | 2.438829813  | 0.036349314 | 0.036349314 | -3.480440094 |
| 1442063_at   | -0.234084952 | 7.521903431 | -2.438727959 | 0.036355497 | 0.036355497 | -3.480576428 |
| 1458648_at   | 0.266159254  | 5.597710639 | 2.438346618  | 0.036378654 | 0.036378654 | -3.481086856 |
| 1425535_at   | -0.225866735 | 4.617979665 | -2.437988638 | 0.036400407 | 0.036400407 | -3.48156601  |
| 1424356_a_at | -0.279794671 | 8.380472648 | -2.43788822  | 0.036406511 | 0.036406511 | -3.481700418 |
| 1449342_at   | -0.201774458 | 9.44240467  | -2.436611213 | 0.036484225 | 0.036484225 | -3.483409632 |
| 1424931_s_at | -0.174893009 | 3.642305938 | -2.43654192  | 0.036488446 | 0.036488446 | -3.483502375 |
| 1440924_at   | 0.198089127  | 4.739682176 | 2.436326274  | 0.036501587 | 0.036501587 | -3.483791    |
| 1451322_at   | -0.341907607 | 5.020047081 | -2.436298859 | 0.036503258 | 0.036503258 | -3.483827693 |
| 1441527_at   | 0.292060379  | 4.638608027 | 2.436288121  | 0.036503913 | 0.036503913 | -3.483842064 |
| 1458907_at   | -0.189584762 | 3.763150874 | -2.436278025 | 0.036504528 | 0.036504528 | -3.483855578 |
| 1452397_at   | 0.19120505   | 5.865228114 | 2.43597816   | 0.036522811 | 0.036522811 | -3.484256919 |
| 1454710_at   | -0.275607269 | 5.151198766 | -2.435818294 | 0.036532562 | 0.036532562 | -3.484470882 |
| 1417553_at   | -0.178175144 | 6.683156414 | -2.435592602 | 0.036546331 | 0.036546331 | -3.484772944 |
| 1418270_at   | -0.272933219 | 6.267314448 | -2.435443802 | 0.036555413 | 0.036555413 | -3.484972096 |
| 1427986_a_at | -0.30895982  | 10.46861026 | -2.435047394 | 0.036579617 | 0.036579617 | -3.485502634 |
| 1455426_at   | 0.23477088   | 11.30470019 | 2.434726744  | 0.036599207 | 0.036599207 | -3.485931777 |
| 1449625_at   | -0.251370785 | 6.773572029 | -2.434559226 | 0.036609445 | 0.036609445 | -3.486155973 |
| 1456163_at   | -0.241114747 | 5.652030686 | -2.433954892 | 0.036646405 | 0.036646405 | -3.486964767 |
| 1435992_at   | -0.51581052  | 5.235862358 | -2.432942844 | 0.036708383 | 0.036708383 | -3.488319178 |
| 1427484_at   | 0.968401823  | 6.432171151 | 2.432719007  | 0.036722104 | 0.036722104 | -3.48861873  |
| 1443101_at   | 0.265679731  | 3.596233156 | 2.432231955  | 0.036751979 | 0.036751979 | -3.489270525 |
| 1423569_at   | -0.301442233 | 6.821347667 | -2.432033229 | 0.036764176 | 0.036764176 | -3.489536465 |
| 1459960_at   | 0.187227939  | 3.250038259 | 2.432029855  | 0.036764383 | 0.036764383 | -3.489540981 |
| 1446876_at   | 0.240642501  | 5.198831103 | 2.431897956  | 0.03677248  | 0.03677248  | -3.489717492 |
| 1453610_at   | -0.250680779 | 4.587550046 | -2.430511762 | 0.036857686 | 0.036857686 | -3.491572478 |
| 1446424_at   | -0.573421614 | 4.91382877  | -2.430442863 | 0.036861926 | 0.036861926 | -3.491664675 |
| 1458391_at   | 0.211853896  | 5.530041522 | 2.42998924   | 0.036889854 | 0.036889854 | -3.492271689 |
| 1418452_at   | 0.197158774  | 6.504815107 | 2.429986831  | 0.036890003 | 0.036890003 | -3.492274911 |
| 1429799_at   | 0.207711114  | 5.419178119 | 2.429837068  | 0.036899228 | 0.036899228 | -3.492475314 |
| 1436568_at   | -0.321035971 | 5.597602876 | -2.429130505 | 0.036942782 | 0.036942782 | -3.493420772 |
| 1442166_at   | -0.313387299 | 8.367249778 | -2.428801353 | 0.036963089 | 0.036963089 | -3.493861207 |
| 1419438_at   | -0.286528669 | 7.648932934 | -2.428648723 | 0.036972509 | 0.036972509 | -3.494065437 |
| 1438974_x_at | 0.246376198  | 5.531799264 | 2.428354964  | 0.036990646 | 0.036990646 | -3.494458506 |
| 1428321_at   | -0.241859558 | 6.807456875 | -2.428118988 | 0.037005222 | 0.037005222 | -3.494774254 |
| 1419254_at   | -0.186475955 | 7.892572121 | -2.42782476  | 0.037023405 | 0.037023405 | -3.495167943 |
| 1456442_at   | 0.223970164  | 5.397139115 | 2.427607185  | 0.037036856 | 0.037036856 | -3.495459064 |
| 1455218_at   | -0.223839762 | 9.105327778 | -2.427491323 | 0.03704402  | 0.03704402  | -3.49561409  |
| 1457492_at   | 0.161449497  | 6.41740297  | 2.427213944  | 0.037061179 | 0.037061179 | -3.495985226 |



|              |              |             |              |             |             |              |
|--------------|--------------|-------------|--------------|-------------|-------------|--------------|
| 1449740_s_at | 0.332256633  | 8.564271774 | 2.427079788  | 0.037069481 | 0.037069481 | -3.496164728 |
| 1440878_at   | 0.235984207  | 7.277762534 | 2.426807734  | 0.037086321 | 0.037086321 | -3.496528734 |
| 1433337_at   | 0.15277869   | 3.905687613 | 2.426642966  | 0.037096524 | 0.037096524 | -3.496749191 |
| 1424187_at   | -0.261116839 | 8.082349626 | -2.426254046 | 0.037120618 | 0.037120618 | -3.497269555 |
| 1433180_at   | -0.208610299 | 5.726967452 | -2.425923092 | 0.037141134 | 0.037141134 | -3.497712355 |
| 1424544_at   | 0.221779514  | 9.223805557 | 2.423950538  | 0.037263643 | 0.037263643 | -3.500351436 |
| 1456818_at   | -0.199169793 | 4.788916097 | -2.423645799 | 0.037282604 | 0.037282604 | -3.500759129 |
| 1429851_at   | -0.599866789 | 6.850200428 | -2.423144843 | 0.037313796 | 0.037313796 | -3.501429323 |
| 1449555_a_at | -0.207806773 | 4.320293637 | -2.422087041 | 0.037379745 | 0.037379745 | -3.50284444  |
| 1433088_at   | -0.306303947 | 4.369216723 | -2.420062399 | 0.037506293 | 0.037506293 | -3.505552838 |
| 1416516_at   | -0.255363739 | 7.261635992 | -2.418335443 | 0.037614569 | 0.037614569 | -3.507862861 |
| 1439476_at   | 0.335424492  | 9.393033885 | 2.41833414   | 0.037614651 | 0.037614651 | -3.507864604 |
| 1440121_at   | 0.249087963  | 7.388615215 | 2.417300009  | 0.037679636 | 0.037679636 | -3.509247815 |
| 1458911_at   | -0.248262738 | 4.503519173 | -2.416723005 | 0.037715943 | 0.037715943 | -3.51001957  |
| 1435053_s_at | 0.19495913   | 4.62474873  | 2.416369131  | 0.037738228 | 0.037738228 | -3.510492876 |
| 1442256_at   | 0.219407295  | 6.750083749 | 2.416032341  | 0.037759448 | 0.037759448 | -3.510943325 |
| 1449693_at   | -0.205575668 | 4.768726678 | -2.414466691 | 0.037858252 | 0.037858252 | -3.513037278 |
| 1421228_at   | 0.198511038  | 4.693718543 | 2.414454025  | 0.037859053 | 0.037859053 | -3.513054216 |
| 1442428_at   | 0.21125649   | 7.169802159 | 2.41417554   | 0.037876654 | 0.037876654 | -3.513426658 |
| 1437987_at   | 0.358506467  | 4.479016586 | 2.414118034  | 0.03788029  | 0.03788029  | -3.513503566 |
| 1425609_at   | -0.250411587 | 4.43332475  | -2.413966019 | 0.037889902 | 0.037889902 | -3.513706868 |
| 1449851_at   | -0.304052529 | 7.599544264 | -2.413922483 | 0.037892655 | 0.037892655 | -3.51376509  |
| 1431399_at   | -0.181947442 | 7.252483702 | -2.413779768 | 0.037901683 | 0.037901683 | -3.513955953 |
| 1459243_at   | 0.224618321  | 6.975113271 | 2.413557487  | 0.037915747 | 0.037915747 | -3.514253221 |
| 1436261_at   | 0.242949738  | 3.665796561 | 2.413275403  | 0.037933602 | 0.037933602 | -3.514630464 |
| 1419362_at   | -0.257712353 | 5.719171052 | -2.412369968 | 0.037990971 | 0.037990971 | -3.515841312 |
| 1437925_at   | -0.202203771 | 4.550231804 | -2.41207845  | 0.03800946  | 0.03800946  | -3.516231155 |
| 1425058_at   | 0.217096653  | 7.487856972 | 2.412056872  | 0.038010829 | 0.038010829 | -3.51626001  |
| 1455326_at   | -0.223628233 | 7.384748767 | -2.411847482 | 0.038024115 | 0.038024115 | -3.51654002  |
| 1452894_at   | 1.193202246  | 5.440201213 | 2.411351745  | 0.038055588 | 0.038055588 | -3.517202944 |
| 1429088_at   | -0.437832961 | 7.074707703 | -2.411163543 | 0.038067544 | 0.038067544 | -3.517454614 |
| 1455882_x_at | -0.295534666 | 6.232805477 | -2.410927043 | 0.038082572 | 0.038082572 | -3.517770868 |
| 1425004_s_at | -0.250863172 | 4.100267394 | -2.409061503 | 0.038201326 | 0.038201326 | -3.520265408 |
| 1430103_at   | -0.198363909 | 5.79764159  | -2.408512267 | 0.038236358 | 0.038236358 | -3.520999795 |
| 1425837_a_at | 0.188015765  | 8.159585448 | 2.407802218  | 0.038281694 | 0.038281694 | -3.521949184 |
| 1417188_s_at | 0.283108134  | 6.338324706 | 2.407502301  | 0.03830086  | 0.03830086  | -3.522350187 |
| 1419697_at   | -0.167873359 | 3.802871373 | -2.407359756 | 0.038309972 | 0.038309972 | -3.522540774 |
| 1427862_at   | -0.178778392 | 5.250679641 | -2.406571466 | 0.038360403 | 0.038360403 | -3.523594727 |
| 1457321_at   | 0.24887347   | 5.567832426 | 2.405608178  | 0.038422118 | 0.038422118 | -3.524882611 |
| 1421435_at   | -0.207571347 | 5.658102266 | -2.405586976 | 0.038423477 | 0.038423477 | -3.524910956 |
| 1454172_at   | 0.280498127  | 5.7265744   | 2.405494047  | 0.038429437 | 0.038429437 | -3.525035197 |
| 1458205_at   | 0.221349416  | 6.043950789 | 2.405406705  | 0.038435038 | 0.038435038 | -3.525151966 |
| 1423352_at   | -0.278387974 | 8.088181401 | -2.405344772 | 0.038439011 | 0.038439011 | -3.525234766 |
| 1420947_at   | 0.359566772  | 8.366965821 | 2.405009588  | 0.038460517 | 0.038460517 | -3.525682881 |
| 1454569_at   | -0.24811371  | 4.413224672 | -2.40397771  | 0.038526801 | 0.038526801 | -3.527062379 |
| 1440353_at   | 0.29725271   | 6.780170996 | 2.403967228  | 0.038527475 | 0.038527475 | -3.527076393 |
| 1433969_at   | -0.401733568 | 5.224354345 | -2.403949135 | 0.038528638 | 0.038528638 | -3.527100581 |
| 1427020_at   | -0.160120403 | 9.535580548 | -2.403872539 | 0.038533563 | 0.038533563 | -3.527202978 |
| 1440059_at   | -0.215205748 | 5.444375858 | -2.402451359 | 0.038625055 | 0.038625055 | -3.529102827 |
| 1425010_at   | 0.232777375  | 5.558489074 | 2.40206917   | 0.038649696 | 0.038649696 | -3.529613724 |
| 1459425_at   | -0.186344922 | 4.693970143 | -2.401576617 | 0.038681475 | 0.038681475 | -3.530272139 |
| 1451013_at   | 0.193112545  | 5.923894966 | 2.401491386  | 0.038686976 | 0.038686976 | -3.530386069 |
| 1448754_at   | 0.205875341  | 9.879247598 | 2.40144668   | 0.038689862 | 0.038689862 | -3.530445828 |

|              |              |             |              |             |             |              |
|--------------|--------------|-------------|--------------|-------------|-------------|--------------|
| 1446279_at   | -0.264380991 | 4.941947547 | -2.401357695 | 0.038695608 | 0.038695608 | -3.530564776 |
| 1419979_s_at | -0.249388832 | 8.925211236 | -2.401264576 | 0.038701621 | 0.038701621 | -3.53068925  |
| 1415877_at   | 0.252555485  | 9.383566158 | 2.401161474  | 0.038708279 | 0.038708279 | -3.530827067 |
| 1446156_at   | -0.152216282 | 3.584223294 | -2.401077805 | 0.038713684 | 0.038713684 | -3.530938907 |
| 1439422_a_at | 0.44226072   | 8.280362066 | 2.401032468  | 0.038716613 | 0.038716613 | -3.53099951  |
| 1417333_at   | -0.261979122 | 5.073268848 | -2.400836789 | 0.038729256 | 0.038729256 | -3.531261072 |
| 1460194_at   | 0.187268141  | 8.079336321 | 2.400663106  | 0.038740482 | 0.038740482 | -3.53149323  |
| 1428664_at   | 1.717690194  | 7.351825747 | 2.40056346   | 0.038746924 | 0.038746924 | -3.531626425 |
| 1456118_at   | 0.15765202   | 8.937904747 | 2.39944544   | 0.038819274 | 0.038819274 | -3.533120818 |
| 1417029_a_at | 0.260425028  | 6.41467772  | 2.398893123  | 0.038855065 | 0.038855065 | -3.533859043 |
| 1419619_at   | 0.19149114   | 5.956211801 | 2.398878644  | 0.038856004 | 0.038856004 | -3.533878395 |
| 1424140_at   | -0.204193704 | 7.92590655  | -2.398860666 | 0.038857169 | 0.038857169 | -3.533902423 |
| 1456356_at   | -0.213011702 | 3.880187189 | -2.398365858 | 0.038889263 | 0.038889263 | -3.534563767 |
| 1444305_at   | -0.212811201 | 4.81680991  | -2.398327718 | 0.038891738 | 0.038891738 | -3.534614744 |
| 1435581_at   | -0.172052347 | 3.742104411 | -2.398012619 | 0.038912191 | 0.038912191 | -3.535035887 |
| 1444056_at   | 0.146801184  | 7.093357128 | 2.397642543  | 0.038936225 | 0.038936225 | -3.535530502 |
| 1421777_at   | -0.232861178 | 3.721573703 | -2.397638383 | 0.038936496 | 0.038936496 | -3.535536062 |
| 1454998_at   | 0.172565792  | 8.10188943  | 2.397201163  | 0.03896491  | 0.03896491  | -3.536120406 |
| 1440065_at   | 0.216261599  | 5.034610651 | 2.397118222  | 0.038970303 | 0.038970303 | -3.536231256 |
| 1425254_at   | -0.235637648 | 6.631285611 | -2.39705572  | 0.038974367 | 0.038974367 | -3.536314789 |
| 1431183_at   | -0.354351241 | 6.223964779 | -2.397017318 | 0.038976864 | 0.038976864 | -3.536366112 |
| 1444831_at   | 0.209941021  | 4.588858125 | 2.396950961  | 0.038981179 | 0.038981179 | -3.536454797 |
| 1422687_at   | 0.153512477  | 9.629263258 | 2.396880962  | 0.038985732 | 0.038985732 | -3.536548349 |
| 1450334_at   | -0.207932231 | 3.413158854 | -2.396306586 | 0.039023111 | 0.039023111 | -3.537315976 |
| 1445742_at   | -0.205704601 | 3.883057194 | -2.396272845 | 0.039025308 | 0.039025308 | -3.537361069 |
| 1424374_at   | 0.261184359  | 7.394902249 | 2.396260757  | 0.039026095 | 0.039026095 | -3.537377224 |
| 1460202_at   | -0.226635078 | 6.264231681 | -2.395966733 | 0.039045244 | 0.039045244 | -3.537770166 |
| 1445181_at   | 0.471890888  | 6.264329864 | 2.395872646  | 0.039051374 | 0.039051374 | -3.537895905 |
| 1456545_at   | -0.164929213 | 5.669553772 | -2.395694705 | 0.03906297  | 0.03906297  | -3.538133708 |
| 1438188_x_at | -0.152842072 | 6.941913217 | -2.394666701 | 0.039130025 | 0.039130025 | -3.539507509 |
| 1418054_at   | -0.216140826 | 3.29736853  | -2.394602453 | 0.039134219 | 0.039134219 | -3.539593366 |
| 1417939_at   | 0.188231115  | 6.573711645 | 2.394581085  | 0.039135615 | 0.039135615 | -3.539621921 |
| 1436601_at   | 0.172875127  | 6.399908408 | 2.394512667  | 0.039140082 | 0.039140082 | -3.539713351 |
| 1458197_x_at | -0.167565862 | 5.523016554 | -2.39427815  | 0.039155399 | 0.039155399 | -3.540026745 |
| 1451659_at   | -0.179533092 | 4.268191408 | -2.394231738 | 0.039158431 | 0.039158431 | -3.540088765 |
| 1418966_a_at | 0.186954967  | 7.831539153 | 2.393777467  | 0.03918812  | 0.03918812  | -3.540695814 |
| 1429487_at   | 0.206128679  | 9.46380821  | 2.392843983  | 0.039249198 | 0.039249198 | -3.541943202 |
| 1453947_at   | -0.335972939 | 4.765460587 | -2.392740787 | 0.039255955 | 0.039255955 | -3.542081097 |
| 1426231_at   | -0.47666022  | 7.01365482  | -2.392644292 | 0.039262276 | 0.039262276 | -3.542210038 |
| 1419398_a_at | -0.267413363 | 9.416573342 | -2.392184841 | 0.039292382 | 0.039292382 | -3.542823966 |
| 1416164_at   | -0.258884431 | 10.74506475 | -2.391366353 | 0.039346071 | 0.039346071 | -3.543917618 |
| 1456624_at   | -0.206095307 | 6.728122042 | -2.391250659 | 0.039353665 | 0.039353665 | -3.544072203 |
| 1444789_at   | -0.233359337 | 5.82645777  | -2.390734056 | 0.039387596 | 0.039387596 | -3.544762458 |
| 1429960_at   | -0.275624819 | 4.458965539 | -2.389473889 | 0.039470484 | 0.039470484 | -3.546446155 |
| 1437002_at   | 0.288137222  | 7.449339743 | 2.389390381  | 0.039475983 | 0.039475983 | -3.546557727 |
| 1424684_at   | 0.537770521  | 8.157846539 | 2.388929365  | 0.039506354 | 0.039506354 | -3.547173661 |
| 1436555_at   | -0.17523361  | 8.011921995 | -2.388761254 | 0.039517435 | 0.039517435 | -3.54739826  |
| 1417065_at   | 0.275976343  | 8.660701402 | 2.388556961  | 0.039530904 | 0.039530904 | -3.547671198 |
| 1419898_s_at | -0.174128669 | 8.34613117  | -2.388182607 | 0.039555598 | 0.039555598 | -3.548171331 |
| 1457955_at   | -0.218674623 | 6.413138385 | -2.388110267 | 0.039560371 | 0.039560371 | -3.548267975 |
| 1446189_at   | 0.204302482  | 3.535725878 | 2.388065799  | 0.039563306 | 0.039563306 | -3.548327384 |
| 1459034_at   | 0.171421705  | 6.023904693 | 2.388055987  | 0.039563954 | 0.039563954 | -3.548340492 |
| 1427029_at   | -0.225537549 | 4.483104073 | -2.387952714 | 0.03957077  | 0.03957077  | -3.548478461 |

|              |              |             |              |             |             |              |
|--------------|--------------|-------------|--------------|-------------|-------------|--------------|
| 1454312_at   | 0.19796199   | 5.736169224 | 2.387643087  | 0.039591213 | 0.039591213 | -3.548892111 |
| 1458818_at   | -0.172116432 | 5.017518797 | -2.38715452  | 0.039623493 | 0.039623493 | -3.549544804 |
| 1419767_at   | -0.14695335  | 4.456550071 | -2.387102645 | 0.039626921 | 0.039626921 | -3.549614105 |
| 1438473_at   | 0.780409831  | 7.017190084 | 2.386823905  | 0.039645351 | 0.039645351 | -3.549986477 |
| 1448415_a_at | -0.302803656 | 7.3508372   | -2.386583664 | 0.039661241 | 0.039661241 | -3.550307413 |
| 1443253_at   | 0.412206827  | 6.245315872 | 2.386528856  | 0.039664868 | 0.039664868 | -3.550380631 |
| 1423201_at   | 0.252294649  | 9.898135928 | 2.386141077  | 0.039690533 | 0.039690533 | -3.550898654 |
| 1450857_a_at | -0.15979304  | 14.02174121 | -2.38611019  | 0.039692578 | 0.039692578 | -3.550939915 |
| 1450108_at   | 0.191776316  | 5.530854908 | 2.385938854  | 0.039703923 | 0.039703923 | -3.551168794 |
| 1428995_at   | -0.247982555 | 5.407341288 | -2.385933373 | 0.039704286 | 0.039704286 | -3.551176116 |
| 1423410_at   | -1.080625117 | 5.782278694 | -2.383955754 | 0.039835474 | 0.039835474 | -3.553817803 |
| 1453325_at   | 0.213800737  | 3.966727401 | 2.383655845  | 0.039855406 | 0.039855406 | -3.554218399 |
| 1439714_at   | -0.189122095 | 3.922812643 | -2.383608138 | 0.039858578 | 0.039858578 | -3.554282122 |
| 1444398_at   | -0.185726665 | 3.931785602 | -2.383466987 | 0.039867963 | 0.039867963 | -3.554470659 |
| 1422215_at   | -0.21265279  | 3.955431484 | -2.383099534 | 0.039892405 | 0.039892405 | -3.554961462 |
| 1421833_at   | -0.202555568 | 6.043283342 | -2.382520153 | 0.039930974 | 0.039930974 | -3.555735322 |
| 1438155_x_at | 0.20473856   | 8.400156695 | 2.382388367  | 0.039939752 | 0.039939752 | -3.555911342 |
| 1439684_at   | 0.236513059  | 3.485050458 | 2.382247581  | 0.039949132 | 0.039949132 | -3.55609938  |
| 1453940_at   | 0.221734698  | 3.739077255 | 2.381700663  | 0.03998559  | 0.03998559  | -3.556829853 |
| 1418573_a_at | 0.241506719  | 9.225432605 | 2.381415878  | 0.040004587 | 0.040004587 | -3.557210209 |
| 1440388_at   | 0.237034611  | 5.757866132 | 2.381019274  | 0.040031058 | 0.040031058 | -3.557739902 |
| 1455149_at   | 0.209985917  | 7.380844513 | 2.380868161  | 0.040041148 | 0.040041148 | -3.557941721 |
| 1417577_at   | 0.19336166   | 6.116288522 | 2.380477592  | 0.04006724  | 0.04006724  | -3.558463341 |
| 1455745_at   | -0.202913813 | 6.28304054  | -2.378703587 | 0.040185961 | 0.040185961 | -3.560832476 |
| 1438109_at   | 0.191536683  | 3.954164218 | 2.37786009   | 0.040242532 | 0.040242532 | -3.561958876 |
| 1435286_at   | -0.329314703 | 5.504595418 | -2.377811519 | 0.040245792 | 0.040245792 | -3.562023736 |
| 1417686_at   | -0.242129394 | 4.64980699  | -2.377691471 | 0.04025385  | 0.04025385  | -3.562184044 |
| 1430707_s_at | 0.176405344  | 3.707678169 | 2.377295106  | 0.040280467 | 0.040280467 | -3.562713329 |
| 1460380_at   | 0.218116859  | 7.024911393 | 2.377188301  | 0.040287643 | 0.040287643 | -3.562855949 |
| 1423152_at   | 1.165467005  | 7.593604922 | 2.37713742   | 0.040291061 | 0.040291061 | -3.562923891 |
| 1443547_at   | 0.208667939  | 6.012755136 | 2.376826643  | 0.040311949 | 0.040311949 | -3.563338876 |
| 1416627_at   | 0.180136589  | 7.871542682 | 2.376642399  | 0.040324337 | 0.040324337 | -3.563584897 |
| 1460696_at   | -0.185267872 | 7.428774704 | -2.376571003 | 0.040329138 | 0.040329138 | -3.563680232 |
| 1425425_a_at | 0.337786161  | 8.516824562 | 2.376507109  | 0.040333436 | 0.040333436 | -3.563765548 |
| 1449297_at   | -0.170352825 | 3.573719222 | -2.376441414 | 0.040337855 | 0.040337855 | -3.563853269 |
| 1433087_at   | -0.210772893 | 3.713111232 | -2.376143194 | 0.040357921 | 0.040357921 | -3.564251474 |
| 1454382_at   | 0.17683034   | 4.120267235 | 2.375792775  | 0.040381512 | 0.040381512 | -3.564719371 |
| 1456563_at   | -0.248312312 | 4.00421619  | -2.375498085 | 0.040401361 | 0.040401361 | -3.565112852 |
| 1446569_at   | 0.195202246  | 5.210251073 | 2.375463512  | 0.040403691 | 0.040403691 | -3.565159014 |
| 1457925_at   | -0.207761659 | 4.974175302 | -2.37474497  | 0.040452133 | 0.040452133 | -3.566118411 |
| 1438594_at   | -0.20064069  | 3.697712928 | -2.37467751  | 0.040456684 | 0.040456684 | -3.566208482 |
| 1452261_at   | 0.175620433  | 8.339747051 | 2.374217976  | 0.040487698 | 0.040487698 | -3.566822031 |
| 1440522_at   | 0.14438239   | 7.070297309 | 2.373801202  | 0.040515847 | 0.040515847 | -3.56737848  |
| 1444017_at   | 0.188562048  | 7.517585861 | 2.373465469  | 0.040538536 | 0.040538536 | -3.567826719 |
| 1455107_at   | 0.155845937  | 9.475225903 | 2.373343349  | 0.040546792 | 0.040546792 | -3.567989761 |
| 1417723_at   | -0.190043436 | 8.672544062 | -2.372820455 | 0.040582162 | 0.040582162 | -3.568687862 |
| 1428157_at   | 0.179086647  | 7.702028676 | 2.372554483  | 0.040600164 | 0.040600164 | -3.569042949 |
| 1459538_at   | -0.184787951 | 3.765607954 | -2.371864234 | 0.040646921 | 0.040646921 | -3.569964444 |
| 1443907_at   | 0.177253246  | 3.354215712 | 2.371154544  | 0.04069505  | 0.04069505  | -3.570911862 |
| 1441898_at   | -0.180842874 | 6.524466094 | -2.371041509 | 0.040702721 | 0.040702721 | -3.571062759 |
| 1453890_at   | 0.188324695  | 3.409870985 | 2.370655282  | 0.040728942 | 0.040728942 | -3.571578345 |
| 1431640_at   | 0.209592148  | 3.490551433 | 2.370535717  | 0.040737063 | 0.040737063 | -3.571737954 |
| 1441228_at   | -0.189169788 | 6.563509197 | -2.370253774 | 0.040756218 | 0.040756218 | -3.572114322 |

|              |              |             |              |             |             |              |
|--------------|--------------|-------------|--------------|-------------|-------------|--------------|
| 1440641_at   | 0.190979592  | 6.364101723 | 2.370236235  | 0.04075741  | 0.04075741  | -3.572137734 |
| 1457277_at   | -0.17948552  | 5.715209727 | -2.369859319 | 0.040783033 | 0.040783033 | -3.572640873 |
| 1452071_at   | -0.200516742 | 5.890747031 | -2.369393942 | 0.040814691 | 0.040814691 | -3.573262084 |
| 1433315_at   | -0.196954231 | 3.846402567 | -2.369092136 | 0.040835235 | 0.040835235 | -3.573664945 |
| 1435415_x_at | 0.186768806  | 7.036620755 | 2.368221096  | 0.040894583 | 0.040894583 | -3.574827603 |
| 1458875_at   | 0.15077948   | 4.354502244 | 2.368200168  | 0.04089601  | 0.04089601  | -3.574855537 |
| 1430283_s_at | -0.248539408 | 3.471028058 | -2.367979214 | 0.040911079 | 0.040911079 | -3.575150459 |
| 1449983_a_at | -0.181365397 | 6.749224312 | -2.367977899 | 0.040911169 | 0.040911169 | -3.575152213 |
| 1456976_at   | 0.423822316  | 6.358390962 | 2.366939493  | 0.04098206  | 0.04098206  | -3.576538192 |
| 1431544_at   | -0.186607846 | 3.625271114 | -2.366883291 | 0.0409859   | 0.0409859   | -3.576613204 |
| 1425719_a_at | 0.256384057  | 7.550546675 | 2.366816528  | 0.040990463 | 0.040990463 | -3.576702311 |
| 1438724_at   | 0.410635337  | 6.212647022 | 2.365714906  | 0.041065817 | 0.041065817 | -3.578172581 |
| 1416757_at   | 0.16189939   | 8.730822911 | 2.365655883  | 0.041069858 | 0.041069858 | -3.578251353 |
| 1436983_at   | 0.36127219   | 9.660790147 | 2.365631479  | 0.041071529 | 0.041071529 | -3.578283923 |
| 1459209_at   | -0.163373494 | 5.079172505 | -2.365547114 | 0.041077306 | 0.041077306 | -3.578396517 |
| 1437780_at   | -0.200512736 | 6.889724291 | -2.364602182 | 0.041142069 | 0.041142069 | -3.579657589 |
| 1452573_a_at | -0.179084422 | 6.747792399 | -2.364513826 | 0.04114813  | 0.04114813  | -3.579775502 |
| 1417288_at   | 0.18565159   | 7.49221365  | 2.364448024  | 0.041152644 | 0.041152644 | -3.579863317 |
| 1435610_at   | 0.175786593  | 4.412602767 | 2.364100957  | 0.041176462 | 0.041176462 | -3.580326481 |
| 1459932_at   | -0.192637963 | 3.151722278 | -2.363917896 | 0.041189031 | 0.041189031 | -3.580570775 |
| 1420357_s_at | 0.642572825  | 7.43245521  | 2.363000119  | 0.041252099 | 0.041252099 | -3.581795512 |
| 1421931_at   | 0.243248081  | 4.180819912 | 2.362940634  | 0.04125619  | 0.04125619  | -3.58187489  |
| 1442017_at   | 0.293123496  | 5.236838106 | 2.362165943  | 0.041309505 | 0.041309505 | -3.582908637 |
| 1429761_at   | 0.80779442   | 7.597275556 | 2.362036485  | 0.041318421 | 0.041318421 | -3.583081381 |
| 1443506_at   | -0.170610038 | 5.439461894 | -2.361839752 | 0.041331974 | 0.041331974 | -3.583343895 |
| 1456543_at   | -0.264543044 | 6.804958067 | -2.360370274 | 0.041433346 | 0.041433346 | -3.585304625 |
| 1436471_at   | -0.215439292 | 6.910858475 | -2.360013702 | 0.041457981 | 0.041457981 | -3.585780379 |
| 1443066_at   | -0.172655987 | 4.043056881 | -2.359998436 | 0.041459036 | 0.041459036 | -3.585800748 |
| 1446636_at   | -0.452559666 | 7.254924532 | -2.359941899 | 0.041462943 | 0.041462943 | -3.585876181 |
| 1417248_at   | 0.221797495  | 9.859716473 | 2.35986561   | 0.041468216 | 0.041468216 | -3.585977967 |
| 1424523_at   | -0.183181756 | 7.717412492 | -2.35982749  | 0.041470851 | 0.041470851 | -3.586028828 |
| 1436616_at   | -0.229127292 | 8.274872324 | -2.359616698 | 0.041485426 | 0.041485426 | -3.586310069 |
| 1433588_at   | 0.171270893  | 8.494249622 | 2.358764772  | 0.04154438  | 0.04154438  | -3.587446689 |
| 1447781_s_at | -0.167965803 | 7.514037204 | -2.358480075 | 0.0415641   | 0.0415641   | -3.587826514 |
| 1421161_at   | -0.18465585  | 3.395249429 | -2.356255087 | 0.041718534 | 0.041718534 | -3.590794772 |
| 1425951_a_at | 0.502443131  | 4.249215429 | 2.356002673  | 0.041736089 | 0.041736089 | -3.591131485 |
| 1449716_s_at | -0.309666573 | 7.095188917 | -2.355407038 | 0.041777544 | 0.041777544 | -3.591926028 |
| 1426411_a_at | -0.217089556 | 7.811680584 | -2.355014602 | 0.041804879 | 0.041804879 | -3.592449501 |
| 1425726_x_at | 0.20621531   | 7.646318952 | 2.35499966   | 0.04180592  | 0.04180592  | -3.592469433 |
| 1456051_at   | -0.222627037 | 4.024573567 | -2.354989509 | 0.041806627 | 0.041806627 | -3.592482973 |
| 1435399_at   | 0.392581967  | 7.152830693 | 2.354209975  | 0.04186098  | 0.04186098  | -3.593522768 |
| 1447269_at   | -0.204875675 | 4.152221012 | -2.354160832 | 0.041864409 | 0.041864409 | -3.593588318 |
| 1450018_s_at | 0.229466742  | 6.512485283 | 2.354017106  | 0.041874438 | 0.041874438 | -3.593780023 |
| 1446783_at   | 0.197030192  | 5.516641701 | 2.354016674  | 0.041874468 | 0.041874468 | -3.5937806   |
| 1457170_at   | -0.27020184  | 4.180756739 | -2.353928267 | 0.041880639 | 0.041880639 | -3.59389852  |
| 1418339_at   | 0.167278769  | 7.518266467 | 2.353684782  | 0.041897638 | 0.041897638 | -3.594223284 |
| 1416239_at   | 0.230173218  | 5.606257553 | 2.352767434  | 0.041961743 | 0.041961743 | -3.595446818 |
| 1428878_a_at | -0.157449018 | 6.980497012 | -2.352512446 | 0.041979579 | 0.041979579 | -3.595786904 |
| 1445799_at   | -0.212341971 | 4.357680486 | -2.351957915 | 0.042018394 | 0.042018394 | -3.596526485 |
| 1440807_at   | 0.482053059  | 4.373706642 | 2.351931572  | 0.042020238 | 0.042020238 | -3.596561619 |
| 1458532_at   | 0.24865613   | 6.215075167 | 2.351697281  | 0.042036649 | 0.042036649 | -3.596874087 |
| 1436399_s_at | -0.402765513 | 6.427215463 | -2.351194517 | 0.042071885 | 0.042071885 | -3.597544599 |
| 1439135_at   | -0.246812565 | 4.667849845 | -2.351128348 | 0.042076525 | 0.042076525 | -3.597632844 |

|              |              |             |              |             |             |              |
|--------------|--------------|-------------|--------------|-------------|-------------|--------------|
| 1432241_at   | 0.165372528  | 5.772301423 | 2.350926929  | 0.042090651 | 0.042090651 | -3.597901461 |
| 1418528_a_at | -0.158582021 | 10.28289398 | -2.350415494 | 0.042126541 | 0.042126541 | -3.59858351  |
| 1428434_at   | 0.468444584  | 7.620489027 | 2.350359599  | 0.042130465 | 0.042130465 | -3.59865805  |
| 1421436_at   | -0.260241949 | 5.31837693  | -2.350344616 | 0.042131517 | 0.042131517 | -3.598678032 |
| 1420585_a_at | 0.182838357  | 4.453174444 | 2.349695818  | 0.042177095 | 0.042177095 | -3.599543237 |
| 1441338_at   | 0.204282458  | 6.946256555 | 2.349335303  | 0.042202442 | 0.042202442 | -3.60002399  |
| 1432542_at   | -0.169019792 | 3.935384061 | -2.34922736  | 0.042210034 | 0.042210034 | -3.600167932 |
| 1420130_s_at | 0.206061451  | 4.756556737 | 2.349069244  | 0.042221157 | 0.042221157 | -3.60037878  |
| 1445451_at   | -0.254252161 | 6.407806471 | -2.34886502  | 0.042235529 | 0.042235529 | -3.600651107 |
| 1438350_at   | 0.208031355  | 3.872759294 | 2.3488611    | 0.042235805 | 0.042235805 | -3.600656336 |
| 1438432_at   | 0.199200297  | 8.668420269 | 2.348296838  | 0.042275537 | 0.042275537 | -3.601408752 |
| 1441503_at   | -0.239830577 | 4.6373513   | -2.348252151 | 0.042278686 | 0.042278686 | -3.601468338 |
| 1456920_at   | -0.1644451   | 4.079290012 | -2.348123121 | 0.042287777 | 0.042287777 | -3.60164039  |
| 1433557_at   | 0.155469711  | 5.215715879 | 2.347978806  | 0.042297948 | 0.042297948 | -3.601832822 |
| 1424630_a_at | 0.178207433  | 6.228670814 | 2.347862714  | 0.042306131 | 0.042306131 | -3.60198762  |
| 1436383_at   | -0.218165449 | 6.648278844 | -2.347768497 | 0.042312774 | 0.042312774 | -3.602113248 |
| 1419627_s_at | 0.505680555  | 5.500245229 | 2.347730652  | 0.042315442 | 0.042315442 | -3.602163711 |
| 1440177_at   | 0.239248538  | 3.672471785 | 2.34706975   | 0.04236207  | 0.04236207  | -3.603044938 |
| 1451204_at   | 0.347191251  | 8.14178934  | 2.347031665  | 0.042364759 | 0.042364759 | -3.603095718 |
| 1452978_at   | -0.291375606 | 6.009381051 | -2.346587154 | 0.04239615  | 0.04239615  | -3.603688397 |
| 1458641_at   | -0.195243864 | 6.520877415 | -2.346483285 | 0.042403488 | 0.042403488 | -3.603826886 |
| 1451411_at   | 0.536192721  | 6.189962446 | 2.346347839  | 0.04241306  | 0.04241306  | -3.604007477 |
| 1454485_at   | 0.193047073  | 3.536286778 | 2.346094412  | 0.042430974 | 0.042430974 | -3.604345368 |
| 1455610_at   | 0.168214616  | 4.91360395  | 2.346056226  | 0.042433674 | 0.042433674 | -3.60439628  |
| 1446997_at   | -0.233857641 | 4.581415823 | -2.345832528 | 0.042449494 | 0.042449494 | -3.604694529 |
| 1417566_at   | 0.184167943  | 7.054742733 | 2.345624887  | 0.042464183 | 0.042464183 | -3.604971367 |
| 1427052_at   | -0.159327454 | 5.795217698 | -2.345552526 | 0.042469304 | 0.042469304 | -3.605067841 |
| 1443061_at   | 0.246915845  | 4.276125488 | 2.345249706  | 0.042490738 | 0.042490738 | -3.60547157  |
| 1422755_at   | -0.191180321 | 5.913766063 | -2.344712897 | 0.042528761 | 0.042528761 | -3.606187243 |
| 1439789_at   | -0.219801184 | 6.550610835 | -2.344130855 | 0.042570026 | 0.042570026 | -3.606963197 |
| 1427399_a_at | -0.170291648 | 3.454214728 | -2.344098623 | 0.042572312 | 0.042572312 | -3.607006167 |
| 1440101_at   | -0.210166345 | 3.8210733   | -2.343348107 | 0.042625582 | 0.042625582 | -3.608006686 |
| 1429327_at   | 0.24994543   | 6.626371913 | 2.343082819  | 0.042644427 | 0.042644427 | -3.608360335 |
| 1426149_at   | -0.17723137  | 4.986721181 | -2.342333393 | 0.042697708 | 0.042697708 | -3.609359346 |
| 1436481_at   | -0.221074687 | 5.359372128 | -2.342088075 | 0.042715163 | 0.042715163 | -3.609686355 |
| 1445297_at   | -0.216545726 | 3.963497289 | -2.34124735  | 0.042775036 | 0.042775036 | -3.610807009 |
| 1438057_at   | 0.402266125  | 5.071971956 | 2.340858733  | 0.04280274  | 0.04280274  | -3.611325003 |
| 1449035_at   | 0.162825064  | 3.840898241 | 2.340408417  | 0.042834865 | 0.042834865 | -3.611925223 |
| 1457630_at   | -0.208231543 | 5.264569232 | -2.340149376 | 0.042853355 | 0.042853355 | -3.612270489 |
| 1444671_at   | 0.308574161  | 5.259126654 | 2.339688533  | 0.042886268 | 0.042886268 | -3.612884715 |
| 1436032_at   | -0.187057839 | 5.342457143 | -2.338404426 | 0.042978111 | 0.042978111 | -3.614596137 |
| 1442413_at   | -0.2191687   | 3.686702488 | -2.338109279 | 0.042999248 | 0.042999248 | -3.614989482 |
| 1425262_at   | 0.149532529  | 9.066525747 | 2.33807464   | 0.04300173  | 0.04300173  | -3.615035646 |
| 1434380_at   | 0.272271893  | 6.291611171 | 2.337133193  | 0.043069224 | 0.043069224 | -3.616290281 |
| 1430899_at   | -0.148897004 | 5.951677261 | -2.33700865  | 0.04307816  | 0.04307816  | -3.61645625  |
| 1415859_at   | 0.231549153  | 9.824852644 | 2.336645944  | 0.043104196 | 0.043104196 | -3.616939595 |
| 1421943_at   | 0.221028416  | 6.030244619 | 2.336584183  | 0.043108631 | 0.043108631 | -3.617021896 |
| 1453750_x_at | -0.263537869 | 6.565565831 | -2.336531856 | 0.043112389 | 0.043112389 | -3.617091627 |
| 1444240_at   | -0.167246791 | 5.083106313 | -2.336116973 | 0.043142195 | 0.043142195 | -3.617644488 |
| 1419563_at   | 0.169852809  | 6.562486542 | 2.336078012  | 0.043144995 | 0.043144995 | -3.617696406 |
| 1438763_at   | -0.378488876 | 5.213518971 | -2.335364317 | 0.043196319 | 0.043196319 | -3.618647423 |
| 1451172_at   | 0.195838688  | 9.893618665 | 2.334911098  | 0.043228942 | 0.043228942 | -3.61925133  |
| 1438585_at   | 0.220687223  | 4.21221071  | 2.334672206  | 0.043246148 | 0.043246148 | -3.619569644 |

|              |              |             |              |             |             |              |
|--------------|--------------|-------------|--------------|-------------|-------------|--------------|
| 1450988_at   | 0.305790309  | 9.085418575 | 2.333460394  | 0.043333529 | 0.043333529 | -3.621184267 |
| 1444472_at   | -0.184652647 | 6.713444687 | -2.333415595 | 0.043336762 | 0.043336762 | -3.621243955 |
| 1417643_at   | -0.698826064 | 8.002890635 | -2.333132571 | 0.043357197 | 0.043357197 | -3.621621039 |
| 1457270_at   | 0.179675308  | 5.982971713 | 2.332947914  | 0.043370535 | 0.043370535 | -3.621867063 |
| 1420683_at   | 0.297853615  | 5.39960511  | 2.332725011  | 0.04338664  | 0.04338664  | -3.62216404  |
| 1422596_at   | 0.18557299   | 6.481575801 | 2.332618468  | 0.04339434  | 0.04339434  | -3.622305987 |
| 1422818_at   | -0.215855825 | 9.442423256 | -2.332538488 | 0.043400121 | 0.043400121 | -3.622412543 |
| 1449588_at   | 0.171452836  | 6.083298843 | 2.332285062  | 0.043418445 | 0.043418445 | -3.622750178 |
| 1458624_at   | -0.362333687 | 4.475098111 | -2.331076773 | 0.043505912 | 0.043505912 | -3.62435989  |
| 1456010_x_at | 0.162894189  | 4.270631403 | 2.330621006  | 0.04353895  | 0.04353895  | -3.624967046 |
| 1456548_at   | 0.202630333  | 5.392902739 | 2.330316673  | 0.043561024 | 0.043561024 | -3.625372458 |
| 1422798_at   | 0.338036799  | 5.223230257 | 2.330291317  | 0.043562864 | 0.043562864 | -3.625406236 |
| 1452638_s_at | 0.164113177  | 6.886387639 | 2.330002944  | 0.043583791 | 0.043583791 | -3.62579038  |
| 1427035_at   | -0.147606376 | 8.213906487 | -2.329750657 | 0.043602108 | 0.043602108 | -3.626126448 |
| 1440943_at   | -0.178573468 | 6.572129608 | -2.329055853 | 0.043652592 | 0.043652592 | -3.627051964 |
| 1443956_at   | 0.324398052  | 4.702188519 | 2.328949372  | 0.043660334 | 0.043660334 | -3.627193799 |
| 1454890_at   | -0.170184644 | 10.36331453 | -2.328496007 | 0.043693312 | 0.043693312 | -3.627797681 |
| 1447974_s_at | -0.150648307 | 4.361870911 | -2.327981329 | 0.043730779 | 0.043730779 | -3.628483214 |
| 1454390_at   | -0.154975213 | 5.9388439   | -2.32762128  | 0.043757009 | 0.043757009 | -3.628962775 |
| 1452779_at   | 0.250154248  | 6.124834133 | 2.327507913  | 0.043765271 | 0.043765271 | -3.629113769 |
| 1459721_at   | 0.170887487  | 5.139951208 | 2.32719016   | 0.043788436 | 0.043788436 | -3.629536983 |
| 1435833_at   | -0.185380086 | 4.076123092 | -2.326872301 | 0.043811621 | 0.043811621 | -3.629960331 |
| 1428634_at   | 0.183741803  | 8.36671323  | 2.326865741  | 0.0438121   | 0.0438121   | -3.629969067 |
| 1448523_at   | -0.199199964 | 8.871623567 | -2.326751842 | 0.043820411 | 0.043820411 | -3.630120764 |
| 1454018_at   | 0.167482584  | 6.344288086 | 2.326553216  | 0.043834908 | 0.043834908 | -3.630385303 |
| 1455609_at   | -0.181480942 | 7.680515822 | -2.326517698 | 0.043837501 | 0.043837501 | -3.630432607 |
| 1454752_at   | -0.444911581 | 6.907494944 | -2.325049754 | 0.043944793 | 0.043944793 | -3.632387578 |
| 1434963_at   | -0.197476833 | 7.34527536  | -2.324958742 | 0.043951454 | 0.043951454 | -3.63250878  |
| 1442889_at   | 0.152271808  | 4.186674809 | 2.32425679   | 0.044002859 | 0.044002859 | -3.63344356  |
| 1420576_at   | -0.16867885  | 5.276669109 | -2.323562135 | 0.044053787 | 0.044053787 | -3.634368582 |
| 1416645_a_at | -1.545915017 | 4.464635731 | -2.322999609 | 0.044095071 | 0.044095071 | -3.635117632 |
| 1418455_at   | -0.224659937 | 9.259593865 | -2.322957278 | 0.044098179 | 0.044098179 | -3.635173998 |
| 1459464_at   | -0.159915754 | 6.840302079 | -2.322930607 | 0.044100137 | 0.044100137 | -3.635209511 |
| 1442675_at   | -0.193805002 | 6.765617296 | -2.322862092 | 0.044105169 | 0.044105169 | -3.635300743 |
| 1435886_at   | -0.172211621 | 7.641025599 | -2.322646493 | 0.044121005 | 0.044121005 | -3.635587821 |
| 1454254_s_at | -0.434754016 | 5.127311435 | -2.32237328  | 0.044141081 | 0.044141081 | -3.635951611 |
| 1447346_s_at | -0.199112146 | 6.162451308 | -2.322134916 | 0.044158604 | 0.044158604 | -3.636268993 |
| 1448912_at   | -0.230031459 | 6.174504197 | -2.321307635 | 0.044219473 | 0.044219473 | -3.637370484 |
| 1444424_at   | 0.34094333   | 6.385160956 | 2.320969586  | 0.044244369 | 0.044244369 | -3.637820566 |
| 1416147_at   | 0.311705251  | 9.225975976 | 2.320603808  | 0.044271323 | 0.044271323 | -3.638307558 |
| 1443163_at   | 0.228638871  | 4.90706258  | 2.320602304  | 0.044271434 | 0.044271434 | -3.63830956  |
| 1415832_at   | -0.252766153 | 10.38669043 | -2.320306465 | 0.044293246 | 0.044293246 | -3.638703428 |
| 1454032_at   | -0.187395598 | 7.017063362 | -2.319844025 | 0.044327363 | 0.044327363 | -3.639319088 |
| 1424852_at   | -0.183948659 | 10.26363901 | -2.319414409 | 0.044359081 | 0.044359081 | -3.639891034 |
| 1436284_s_at | -0.301489094 | 6.523465026 | -2.3193659   | 0.044362663 | 0.044362663 | -3.639955613 |
| 1441071_at   | 0.777334057  | 6.460200236 | 2.31884005   | 0.044401519 | 0.044401519 | -3.640655652 |
| 1442977_at   | 0.398895066  | 9.133988588 | 2.318528254  | 0.044424574 | 0.044424574 | -3.641070721 |
| 1440870_at   | 0.295160339  | 6.958726788 | 2.318294342  | 0.044441878 | 0.044441878 | -3.641382104 |
| 1433905_at   | 0.251367081  | 7.28700983  | 2.318290489  | 0.044442163 | 0.044442163 | -3.641387232 |
| 1441984_at   | 0.205816458  | 6.112289884 | 2.318249009  | 0.044445233 | 0.044445233 | -3.64144245  |
| 1459472_at   | 0.194870527  | 3.907415466 | 2.317637975  | 0.044490469 | 0.044490469 | -3.642255835 |
| 1429669_at   | -0.190445773 | 4.228432313 | -2.317622419 | 0.044491621 | 0.044491621 | -3.642276541 |
| 1455672_s_at | -0.180244231 | 8.127285926 | -2.317569496 | 0.044495541 | 0.044495541 | -3.642346989 |



|              |              |             |              |             |             |              |
|--------------|--------------|-------------|--------------|-------------|-------------|--------------|
| 1455935_at   | -0.200288724 | 7.352338432 | -2.317558027 | 0.044496391 | 0.044496391 | -3.642362257 |
| 1416016_at   | 0.189428828  | 5.821574429 | 2.316549127  | 0.04457119  | 0.04457119  | -3.643705192 |
| 1433578_at   | 0.591921876  | 4.562772448 | 2.316499716  | 0.044574857 | 0.044574857 | -3.643770961 |
| 1420874_at   | -0.151971173 | 8.162076364 | -2.316014187 | 0.0446109   | 0.0446109   | -3.644417212 |
| 1459795_at   | 0.164540444  | 3.354466701 | 2.314997576  | 0.044686462 | 0.044686462 | -3.645770286 |
| 1447325_at   | 0.193292601  | 4.950331888 | 2.314907905  | 0.044693133 | 0.044693133 | -3.64588963  |
| 1448944_at   | -0.210323307 | 9.150303709 | -2.314879342 | 0.044695258 | 0.044695258 | -3.645927646 |
| 1432309_at   | -0.191788434 | 3.948156164 | -2.313728064 | 0.044780998 | 0.044780998 | -3.647459845 |
| 1421578_at   | -0.222208211 | 6.060868312 | -2.313680437 | 0.044784548 | 0.044784548 | -3.647523228 |
| 1437231_at   | 0.32266408   | 7.35147292  | 2.313556545  | 0.044793785 | 0.044793785 | -3.647688105 |
| 1442480_at   | -0.180315032 | 3.844130207 | -2.313469255 | 0.044800294 | 0.044800294 | -3.647804271 |
| 1452988_at   | 0.224699341  | 7.161263888 | 2.312801229  | 0.044850139 | 0.044850139 | -3.648693262 |
| 1442621_at   | 0.207211114  | 5.497652223 | 2.312587733  | 0.04486608  | 0.04486608  | -3.648977369 |
| 1437756_at   | 0.466759173  | 5.411475629 | 2.312503746  | 0.044872353 | 0.044872353 | -3.649089134 |
| 1431213_a_at | -0.545992637 | 7.398822863 | -2.311980272 | 0.044911469 | 0.044911469 | -3.64978572  |
| 1422177_at   | -0.152834017 | 4.326586249 | -2.311420007 | 0.044953371 | 0.044953371 | -3.650531241 |
| 1454572_at   | 0.250083961  | 4.134970199 | 2.311325818  | 0.044960419 | 0.044960419 | -3.650656571 |
| 1449544_a_at | -0.227803304 | 6.149646465 | -2.311261347 | 0.044965244 | 0.044965244 | -3.650742358 |
| 1458841_at   | -0.205506261 | 3.549960561 | -2.310863538 | 0.044995028 | 0.044995028 | -3.651271685 |
| 1421180_at   | 0.318520572  | 6.626702363 | 2.310783423  | 0.045001028 | 0.045001028 | -3.651378284 |
| 1420361_at   | 0.177536214  | 5.638484081 | 2.310561152  | 0.045017679 | 0.045017679 | -3.651674032 |
| 1451750_at   | -0.15328452  | 6.085672397 | -2.310509126 | 0.045021578 | 0.045021578 | -3.651743256 |
| 1425646_at   | 0.229261128  | 4.189746846 | 2.309797924  | 0.045074903 | 0.045074903 | -3.652689531 |
| 1451954_at   | 0.17781375   | 3.362554966 | 2.309471677  | 0.045099385 | 0.045099385 | -3.653123599 |
| 1454944_at   | 0.177238793  | 7.500917108 | 2.309389636  | 0.045105544 | 0.045105544 | -3.653232752 |
| 1437001_at   | 0.209218419  | 9.426577906 | 2.308813908  | 0.045148785 | 0.045148785 | -3.653998726 |
| 1448640_at   | 0.188593301  | 3.918571413 | 2.308691248  | 0.045158003 | 0.045158003 | -3.654161915 |
| 1449408_at   | -0.292114599 | 6.851522239 | -2.308637149 | 0.045162069 | 0.045162069 | -3.654233888 |
| 1456096_at   | -0.146524195 | 4.586706871 | -2.308571758 | 0.045166985 | 0.045166985 | -3.654320884 |
| 1453211_at   | -0.358832816 | 5.678060433 | -2.308491741 | 0.045173    | 0.045173    | -3.654427338 |
| 1441197_at   | 0.360490317  | 5.128421301 | 2.308456711  | 0.045175634 | 0.045175634 | -3.654473942 |
| 1430845_at   | -0.35024965  | 5.273997577 | -2.308377381 | 0.045181599 | 0.045181599 | -3.654579482 |
| 1453220_at   | -0.143665978 | 3.831972466 | -2.308281805 | 0.045188786 | 0.045188786 | -3.654706634 |
| 1426509_s_at | 0.193579206  | 4.196513186 | 2.308180143  | 0.045196433 | 0.045196433 | -3.654841883 |
| 1456172_at   | -0.169479598 | 7.431487022 | -2.308080918 | 0.045203897 | 0.045203897 | -3.654973887 |
| 1436311_at   | 0.295745633  | 6.168809001 | 2.307326567  | 0.045260684 | 0.045260684 | -3.655977422 |
| 1444771_at   | 0.13919763   | 3.223800247 | 2.307043174  | 0.045282035 | 0.045282035 | -3.656354415 |
| 1441723_at   | -0.195015642 | 3.541136554 | -2.306926223 | 0.04529085  | 0.04529085  | -3.656509991 |
| 1425793_a_at | -0.203098554 | 3.814970765 | -2.306830842 | 0.045298039 | 0.045298039 | -3.656636873 |
| 1440158_x_at | 0.164548235  | 3.256644092 | 2.306591976  | 0.04531605  | 0.04531605  | -3.656954622 |
| 1445221_at   | 0.287041481  | 4.099720905 | 2.306004104  | 0.045360406 | 0.045360406 | -3.657736617 |
| 1432860_at   | -0.249254176 | 7.431716559 | -2.305359085 | 0.045409123 | 0.045409123 | -3.658594594 |
| 1456483_at   | -0.167136427 | 8.566169574 | -2.303311498 | 0.045564111 | 0.045564111 | -3.661317979 |
| 1450255_at   | 0.181398333  | 5.250226134 | 2.30328516   | 0.045566108 | 0.045566108 | -3.661353007 |
| 1428682_at   | 0.220318508  | 4.514539717 | 2.302878096  | 0.045596983 | 0.045596983 | -3.661894379 |
| 1441722_at   | 0.22079997   | 8.624227947 | 2.3026947    | 0.0456109   | 0.0456109   | -3.66213828  |
| 1445938_at   | -0.261009247 | 6.849727238 | -2.302401221 | 0.045633179 | 0.045633179 | -3.662528576 |
| 1435194_at   | 0.308503121  | 9.432881775 | 2.302390893  | 0.045633963 | 0.045633963 | -3.662542311 |
| 1440704_at   | -0.165066563 | 3.976543213 | -2.302133277 | 0.045653529 | 0.045653529 | -3.662884907 |
| 1427950_at   | 0.254125286  | 7.174411947 | 2.302063747  | 0.045658811 | 0.045658811 | -3.662977372 |
| 1433592_at   | 0.183886823  | 9.286891364 | 2.302040118  | 0.045660607 | 0.045660607 | -3.663008795 |
| 1450401_at   | 0.349001979  | 8.609902787 | 2.302004136  | 0.04566334  | 0.04566334  | -3.663056646 |
| 1443039_at   | -0.149018929 | 3.819631417 | -2.301557982 | 0.045697252 | 0.045697252 | -3.663649956 |

|              |              |             |              |             |             |              |
|--------------|--------------|-------------|--------------|-------------|-------------|--------------|
| 1457214_at   | 0.222778048  | 5.457845468 | 2.301349093  | 0.045713138 | 0.045713138 | -3.663927737 |
| 1436371_at   | -0.198487377 | 4.878774334 | -2.300940723 | 0.04574421  | 0.04574421  | -3.664470777 |
| 1429603_at   | 0.13877897   | 7.693086802 | 2.300921201  | 0.045745696 | 0.045745696 | -3.664496737 |
| 1439728_at   | -0.238141454 | 5.309813208 | -2.299996089 | 0.045816164 | 0.045816164 | -3.665726875 |
| 1419892_at   | -0.165809377 | 6.382531851 | -2.299717821 | 0.045837381 | 0.045837381 | -3.666096879 |
| 1449981_a_at | 0.196129883  | 6.970904002 | 2.29968878   | 0.045839596 | 0.045839596 | -3.666135493 |
| 1426105_a_at | -0.226923764 | 6.934562432 | -2.29950616  | 0.045853526 | 0.045853526 | -3.666378312 |
| 1453937_at   | -0.19182563  | 3.424574323 | -2.299408637 | 0.045860967 | 0.045860967 | -3.666507982 |
| 1429463_at   | 0.259912861  | 6.33894427  | 2.298846258  | 0.045903898 | 0.045903898 | -3.667255723 |
| 1433281_at   | -0.172701736 | 4.300860319 | -2.298300436 | 0.045945603 | 0.045945603 | -3.667981425 |
| 1455869_at   | -0.940394411 | 6.950704193 | -2.298228558 | 0.045951097 | 0.045951097 | -3.668076988 |
| 1435547_at   | 0.160308387  | 9.681670422 | 2.297854705  | 0.045979687 | 0.045979687 | -3.668574031 |
| 1456850_at   | 0.152439864  | 4.256531536 | 2.297846934  | 0.045980282 | 0.045980282 | -3.668584362 |
| 1434162_at   | 0.183751994  | 8.658459893 | 2.297735784  | 0.045988785 | 0.045988785 | -3.668732134 |
| 1419666_x_at | -0.409443561 | 7.223268479 | -2.297565399 | 0.046001823 | 0.046001823 | -3.668958657 |
| 1449968_s_at | 0.173336628  | 8.991040511 | 2.297287706  | 0.046023081 | 0.046023081 | -3.669327839 |
| 1457598_at   | 0.198440815  | 6.156867596 | 2.296875656  | 0.046054641 | 0.046054641 | -3.669875629 |
| 1444428_at   | -0.15676518  | 4.704764812 | -2.296701537 | 0.046067983 | 0.046067983 | -3.670107103 |
| 1448966_a_at | 0.20395224   | 4.189029401 | 2.296627106  | 0.046073688 | 0.046073688 | -3.670206052 |
| 1429637_at   | 0.250635997  | 5.581519971 | 2.296461332  | 0.046086396 | 0.046086396 | -3.670426428 |
| 1436272_at   | 0.178473566  | 6.289951052 | 2.296353915  | 0.046094633 | 0.046094633 | -3.670569226 |
| 1444337_at   | -0.234730565 | 6.464083683 | -2.29604799  | 0.046118098 | 0.046118098 | -3.670975908 |
| 1427254_at   | 0.190914883  | 9.215112099 | 2.295961392  | 0.046124742 | 0.046124742 | -3.671091025 |
| 1428642_at   | -0.161378432 | 4.346735875 | -2.295175338 | 0.046185097 | 0.046185097 | -3.672135924 |
| 1442676_at   | 0.35493717   | 7.839069049 | 2.295012985  | 0.046197572 | 0.046197572 | -3.672351732 |
| 1443670_at   | -0.247724474 | 6.457624861 | -2.294950717 | 0.046202358 | 0.046202358 | -3.672434502 |
| 1439069_a_at | -0.206481137 | 9.338665983 | -2.294414585 | 0.046243582 | 0.046243582 | -3.673147138 |
| 1424879_at   | -0.193687992 | 6.459523335 | -2.294027692 | 0.046273354 | 0.046273354 | -3.673661389 |
| 1444270_at   | -0.538706081 | 5.452725274 | -2.293743558 | 0.04629523  | 0.04629523  | -3.674039046 |
| 1448261_at   | 0.279399836  | 9.113494816 | 2.293298909  | 0.046329485 | 0.046329485 | -3.674630037 |
| 1417946_at   | -0.357132867 | 4.230533786 | -2.293121115 | 0.046343189 | 0.046343189 | -3.674866341 |
| 1451749_at   | 0.258544926  | 4.834762674 | 2.292982387  | 0.046353884 | 0.046353884 | -3.675050722 |
| 1418637_at   | 0.200320745  | 7.833088053 | 2.291919279  | 0.046435926 | 0.046435926 | -3.676463617 |
| 1437283_at   | 0.155655629  | 8.595167667 | 2.29184731   | 0.046441486 | 0.046441486 | -3.676559262 |
| 1444006_at   | 0.298263093  | 5.111116978 | 2.29181544   | 0.046443948 | 0.046443948 | -3.676601616 |
| 1424232_a_at | -0.204315024 | 4.791208007 | -2.291790768 | 0.046445854 | 0.046445854 | -3.676634404 |
| 1438200_at   | 0.201013904  | 10.29271733 | 2.29156965   | 0.046462939 | 0.046462939 | -3.676928261 |
| 1451430_at   | 0.256489681  | 6.28174376  | 2.291271101  | 0.046486017 | 0.046486017 | -3.677325013 |
| 1451784_x_at | -0.479092354 | 8.721450445 | -2.2911978   | 0.046491686 | 0.046491686 | -3.677422424 |
| 1447508_at   | 0.176849894  | 3.351292472 | 2.291194545  | 0.046491937 | 0.046491937 | -3.677426749 |
| 1446014_at   | -0.179315593 | 6.891070281 | -2.290848418 | 0.046518711 | 0.046518711 | -3.677886717 |
| 1432944_at   | -0.307466279 | 4.768433338 | -2.290839007 | 0.046519439 | 0.046519439 | -3.677899222 |
| 1443793_x_at | -0.288852025 | 5.429099667 | -2.290650615 | 0.046534018 | 0.046534018 | -3.678149571 |
| 1455061_a_at | 0.156577468  | 8.542723881 | 2.29037451   | 0.046555393 | 0.046555393 | -3.678516475 |
| 1434969_at   | 0.340074167  | 6.263236293 | 2.290334115  | 0.046558521 | 0.046558521 | -3.678570153 |
| 1446619_at   | -0.184332612 | 3.46899104  | -2.289947288 | 0.046588486 | 0.046588486 | -3.679084177 |
| 1440883_at   | -0.187188769 | 6.082158326 | -2.289801724 | 0.046599766 | 0.046599766 | -3.679277601 |
| 1456756_at   | -0.172621228 | 9.621248207 | -2.289698277 | 0.046607785 | 0.046607785 | -3.679415061 |
| 1459659_at   | 0.149284218  | 6.934126384 | 2.289459194  | 0.046626322 | 0.046626322 | -3.679732747 |
| 1427367_at   | -0.198869714 | 6.593471779 | -2.289450586 | 0.046626989 | 0.046626989 | -3.679744185 |
| 1430316_at   | 0.201597325  | 6.03498073  | 2.28932844   | 0.046636462 | 0.046636462 | -3.679906487 |
| 1426603_at   | 0.294973132  | 5.816387424 | 2.289278415  | 0.046640343 | 0.046640343 | -3.679972958 |
| 1457609_at   | 0.142399301  | 5.011113198 | 2.287865959  | 0.046750035 | 0.046750035 | -3.68184966  |

|              |              |             |              |             |             |              |
|--------------|--------------|-------------|--------------|-------------|-------------|--------------|
| 1442081_at   | 0.197500217  | 4.073178532 | 2.287849718  | 0.046751298 | 0.046751298 | -3.681871238 |
| 1440926_at   | 0.147990015  | 5.670494064 | 2.287819213  | 0.04675367  | 0.04675367  | -3.681911767 |
| 1424369_at   | 0.139087744  | 7.149737748 | 2.287758187  | 0.046758415 | 0.046758415 | -3.681992847 |
| 1443546_at   | -0.175028491 | 8.22768362  | -2.287226787 | 0.046799756 | 0.046799756 | -3.682698857 |
| 1435692_at   | 0.19661644   | 6.432723686 | 2.286778159  | 0.046834686 | 0.046834686 | -3.683294877 |
| 1429740_at   | -0.168560043 | 4.828231475 | -2.286750037 | 0.046836877 | 0.046836877 | -3.683332238 |
| 1448842_at   | -0.18685978  | 10.05851387 | -2.286619726 | 0.046847028 | 0.046847028 | -3.683505358 |
| 1445122_at   | -0.17146413  | 3.75610845  | -2.286475664 | 0.046858253 | 0.046858253 | -3.683696744 |
| 1435188_at   | -0.167057835 | 5.659967913 | -2.286160891 | 0.046882788 | 0.046882788 | -3.684114913 |
| 1441442_at   | 0.221078615  | 4.525332975 | 2.286002907  | 0.046895107 | 0.046895107 | -3.684324788 |
| 1457209_at   | 0.260442804  | 6.023371404 | 2.285624228  | 0.046924647 | 0.046924647 | -3.684827838 |
| 1427870_x_at | -0.222017807 | 6.981799508 | -2.28544513  | 0.046938625 | 0.046938625 | -3.685065753 |
| 1453351_at   | 0.187407993  | 3.289500575 | 2.285055195  | 0.046969072 | 0.046969072 | -3.685583735 |
| 1445305_at   | -0.224315632 | 6.659617502 | -2.284655999 | 0.047000261 | 0.047000261 | -3.686114006 |
| 1432520_at   | -0.197044655 | 3.556741029 | -2.284535393 | 0.047009688 | 0.047009688 | -3.68627421  |
| 1452471_at   | -0.207751991 | 4.230325894 | -2.284397143 | 0.047020497 | 0.047020497 | -3.686457849 |
| 1436090_at   | -0.18389969  | 4.047086248 | -2.283674166 | 0.047077059 | 0.047077059 | -3.687418159 |
| 1439115_at   | 0.208459407  | 5.126637997 | 2.283633294  | 0.047080259 | 0.047080259 | -3.687472448 |
| 1460238_at   | -0.275921398 | 4.558326639 | -2.283513599 | 0.04708963  | 0.04708963  | -3.68763143  |
| 1447496_s_at | -0.188481797 | 6.476621119 | -2.283417241 | 0.047097176 | 0.047097176 | -3.687759414 |
| 1455258_at   | -0.169709411 | 3.854200598 | -2.283411144 | 0.047097654 | 0.047097654 | -3.687767513 |
| 1428972_at   | -0.221439516 | 7.302329445 | -2.283115358 | 0.047120824 | 0.047120824 | -3.688160376 |
| 1448824_at   | -0.155665784 | 7.788547153 | -2.282406566 | 0.047176391 | 0.047176391 | -3.689101763 |
| 1446141_at   | 0.152663738  | 7.188582163 | 2.282345197  | 0.047181206 | 0.047181206 | -3.689183269 |
| 1456736_x_at | 0.326382983  | 10.10362262 | 2.282133351  | 0.047197828 | 0.047197828 | -3.689464623 |
| 1454079_at   | 0.185726579  | 6.131090532 | 2.282072346  | 0.047202616 | 0.047202616 | -3.689545644 |
| 1444427_at   | -0.333058768 | 6.566881351 | -2.281223561 | 0.047269279 | 0.047269279 | -3.690672877 |
| 1447606_x_at | -0.242659488 | 5.968415293 | -2.280511128 | 0.047325304 | 0.047325304 | -3.691618975 |
| 1432133_at   | -0.153786117 | 5.79505746  | -2.280290857 | 0.047342639 | 0.047342639 | -3.691911483 |
| 1459516_at   | 0.209050684  | 7.382165889 | 2.279820884  | 0.047379646 | 0.047379646 | -3.692535564 |
| 1416715_at   | 0.168471546  | 5.193376469 | 2.279411632  | 0.047411895 | 0.047411895 | -3.693078997 |
| 1446337_at   | 0.299709865  | 5.903980502 | 2.279277364  | 0.04742248  | 0.04742248  | -3.693257283 |
| 1432839_at   | -0.33270872  | 6.077443885 | -2.279265079 | 0.047423449 | 0.047423449 | -3.693273595 |
| 1452055_at   | -0.240176664 | 9.40839682  | -2.279178546 | 0.047430272 | 0.047430272 | -3.693388497 |
| 1435393_at   | 0.157373526  | 4.800983614 | 2.279109304  | 0.047435732 | 0.047435732 | -3.693480439 |
| 1446503_at   | 0.183718833  | 3.725298488 | 2.278991602  | 0.047445015 | 0.047445015 | -3.693636724 |
| 1460352_s_at | 0.186353914  | 7.706514973 | 2.278717956  | 0.047466605 | 0.047466605 | -3.694000072 |
| 1418890_a_at | 0.178013522  | 6.700073971 | 2.278668874  | 0.047470479 | 0.047470479 | -3.694065242 |
| 1437374_at   | -0.18293484  | 6.958236209 | -2.277626329 | 0.047552827 | 0.047552827 | -3.695449462 |
| 1421047_at   | 0.208527149  | 8.676726177 | 2.277560506  | 0.047558031 | 0.047558031 | -3.695536854 |
| 1453500_at   | -0.184571527 | 5.073061015 | -2.277526852 | 0.047560692 | 0.047560692 | -3.695581536 |
| 1419366_at   | -0.152296252 | 7.108029484 | -2.277516347 | 0.047561522 | 0.047561522 | -3.695595483 |
| 1459422_at   | 0.168353826  | 4.103535396 | 2.276953419  | 0.047606052 | 0.047606052 | -3.696342854 |
| 1444358_at   | 0.217489723  | 4.501509054 | 2.276149826  | 0.047669691 | 0.047669691 | -3.697409691 |
| 1424583_at   | -0.211198086 | 6.379830715 | -2.276114245 | 0.047672511 | 0.047672511 | -3.697456926 |
| 1459943_at   | 0.207018494  | 3.693053587 | 2.275618471  | 0.047711816 | 0.047711816 | -3.698115076 |
| 1424041_s_at | -0.318535479 | 6.579761864 | -2.27557769  | 0.04771505  | 0.04771505  | -3.698169213 |
| 1445414_at   | 0.141549084  | 3.860959712 | 2.275429692  | 0.047726791 | 0.047726791 | -3.698365678 |
| 1459024_at   | 0.166602999  | 3.584740588 | 2.275424167  | 0.047727229 | 0.047727229 | -3.698373013 |
| 1460657_at   | 0.144511928  | 7.456311886 | 2.275298318  | 0.047737215 | 0.047737215 | -3.698540074 |
| 1458574_at   | -0.331737497 | 4.995740056 | -2.275157409 | 0.047748398 | 0.047748398 | -3.698727125 |
| 1435607_at   | -0.166089234 | 5.284172004 | -2.274518068 | 0.04779917  | 0.04779917  | -3.699575802 |
| 1457799_at   | -0.179066776 | 4.831517124 | -2.274445488 | 0.047804937 | 0.047804937 | -3.699672143 |

|              |              |             |              |             |             |              |
|--------------|--------------|-------------|--------------|-------------|-------------|--------------|
| 1444998_at   | -0.161410917 | 8.060752815 | -2.273422209 | 0.047886318 | 0.047886318 | -3.701030382 |
| 1456430_at   | 0.151684769  | 8.041607881 | 2.273405799  | 0.047887624 | 0.047887624 | -3.701052162 |
| 1431055_a_at | 0.17510643   | 7.497158752 | 2.273233169  | 0.047901367 | 0.047901367 | -3.701281292 |
| 1449857_at   | 0.203763176  | 6.967882812 | 2.273143279  | 0.047908525 | 0.047908525 | -3.7014006   |
| 1433362_at   | 0.182756945  | 4.441188868 | 2.273082787  | 0.047913342 | 0.047913342 | -3.701480888 |
| 1446384_at   | -0.213142407 | 4.409869242 | -2.273024647 | 0.047917972 | 0.047917972 | -3.701558054 |
| 1426755_at   | -0.220379072 | 10.81166617 | -2.272852415 | 0.047931692 | 0.047931692 | -3.701786649 |
| 1419180_at   | -0.272753218 | 7.974504681 | -2.272846956 | 0.047932127 | 0.047932127 | -3.701793894 |
| 1436787_x_at | -0.605818961 | 6.345078585 | -2.27204578  | 0.047995998 | 0.047995998 | -3.702857213 |
| 1423064_at   | 0.15812377   | 8.072121951 | 2.27174011   | 0.048020389 | 0.048020389 | -3.703262883 |
| 1443096_at   | -0.174929329 | 5.043037463 | -2.27137302  | 0.048049696 | 0.048049696 | -3.703750053 |
| 1446029_at   | -0.329167488 | 5.833246576 | -2.271220898 | 0.048061847 | 0.048061847 | -3.703951933 |
| 1434585_at   | -0.149699645 | 7.943701686 | -2.270769699 | 0.048097902 | 0.048097902 | -3.704550702 |
| 1451979_at   | 0.209607284  | 9.263128262 | 2.270555438  | 0.048115033 | 0.048115033 | -3.704835033 |
| 1443914_at   | -0.162044987 | 3.779215314 | -2.270426737 | 0.048125326 | 0.048125326 | -3.705005821 |
| 1451569_at   | 0.262788234  | 7.94993428  | 2.270261823  | 0.048138518 | 0.048138518 | -3.705224661 |
| 1459048_s_at | 0.196770349  | 7.197515027 | 2.270104062  | 0.048151141 | 0.048151141 | -3.705434008 |
| 1420425_at   | 0.337038595  | 5.962045634 | 2.269952608  | 0.048163263 | 0.048163263 | -3.705634983 |
| 1436463_at   | 0.269932613  | 3.873369356 | 2.269805108  | 0.048175071 | 0.048175071 | -3.705830708 |
| 1430788_at   | -0.196220737 | 3.334643805 | -2.268713763 | 0.048262526 | 0.048262526 | -3.707278809 |
| 1458241_at   | 0.24773858   | 7.75681102  | 2.266574234  | 0.048434428 | 0.048434428 | -3.710117411 |
| 1433446_at   | 0.197694724  | 9.60402411  | 2.266567474  | 0.048434972 | 0.048434972 | -3.710126378 |
| 1428105_at   | 0.193672624  | 7.991135796 | 2.266464561  | 0.048443256 | 0.048443256 | -3.710262906 |
| 1426572_at   | -0.160368547 | 7.966315692 | -2.266442897 | 0.048445    | 0.048445    | -3.710291646 |
| 1449935_a_at | 0.164982065  | 8.464678599 | 2.266155563  | 0.048468136 | 0.048468136 | -3.710672827 |
| 1430196_at   | -0.267633104 | 7.482124358 | -2.265870618 | 0.048491091 | 0.048491091 | -3.71105083  |
| 1441751_at   | 0.224380774  | 5.573274104 | 2.265345861  | 0.048533392 | 0.048533392 | -3.711746944 |
| 1444813_at   | -0.194294431 | 3.893448751 | -2.264608016 | 0.048592932 | 0.048592932 | -3.712725682 |
| 1445258_at   | 0.172778035  | 5.004288942 | 2.264551913  | 0.048597462 | 0.048597462 | -3.7128001   |
| 1430589_at   | 0.221827899  | 3.641316554 | 2.264200548  | 0.048625843 | 0.048625843 | -3.713266161 |
| 1455489_at   | 0.242934558  | 3.959418436 | 2.263861196  | 0.048653268 | 0.048653268 | -3.713716274 |
| 1438869_at   | -0.142807521 | 4.469466936 | -2.263834731 | 0.048655408 | 0.048655408 | -3.713751376 |
| 1459376_at   | -0.219679913 | 6.756938233 | -2.2637227   | 0.048664466 | 0.048664466 | -3.71389997  |
| 1428129_at   | -0.19207223  | 9.429843707 | -2.263608871 | 0.04867367  | 0.04867367  | -3.714050948 |
| 1417824_at   | 0.148268306  | 4.964879353 | 2.263597266  | 0.048674609 | 0.048674609 | -3.71406634  |
| 1445038_at   | -0.170662749 | 4.801570145 | -2.263484101 | 0.048683762 | 0.048683762 | -3.714216437 |
| 1416168_at   | -0.180548716 | 11.26936324 | -2.263046534 | 0.048719169 | 0.048719169 | -3.714796788 |
| 1423514_at   | -0.176643918 | 3.686967521 | -2.26293455  | 0.048728235 | 0.048728235 | -3.714945312 |
| 1449126_at   | 0.154869635  | 8.249810502 | 2.26271742   | 0.048745817 | 0.048745817 | -3.715233286 |
| 1448502_at   | -0.167146374 | 6.113165639 | -2.262614247 | 0.048754173 | 0.048754173 | -3.71537012  |
| 1443318_at   | 0.164959009  | 3.870201886 | 2.262577301  | 0.048757166 | 0.048757166 | -3.71541912  |
| 1434504_at   | -0.209832606 | 5.889390323 | -2.261208106 | 0.048868206 | 0.048868206 | -3.717234922 |
| 1429744_at   | -0.160998889 | 3.899784913 | -2.260645912 | 0.04891387  | 0.04891387  | -3.71798044  |
| 1434537_at   | 0.17880494   | 6.596870064 | 2.260201666  | 0.048949984 | 0.048949984 | -3.718569528 |
| 1439990_at   | -0.17480159  | 8.336985628 | -2.260137176 | 0.048955228 | 0.048955228 | -3.718655043 |
| 1447953_at   | 0.231012065  | 7.050983436 | 2.259953897  | 0.048970136 | 0.048970136 | -3.71889807  |
| 1429722_at   | 0.184144567  | 8.385947841 | 2.259936263  | 0.048971571 | 0.048971571 | -3.718921452 |
| 1448443_at   | 0.280978725  | 5.175755196 | 2.259892395  | 0.04897514  | 0.04897514  | -3.718979622 |
| 1459680_at   | 0.226116874  | 4.642042824 | 2.259416217  | 0.049013898 | 0.049013898 | -3.719611015 |
| 1439278_at   | -0.170060296 | 6.536987871 | -2.259364929 | 0.049018074 | 0.049018074 | -3.719679019 |
| 1421815_at   | 0.259721131  | 8.224642463 | 2.259319683  | 0.049021758 | 0.049021758 | -3.719739014 |
| 1442162_at   | -0.222412695 | 4.549858963 | -2.259139257 | 0.049036454 | 0.049036454 | -3.719978244 |
| 1454370_at   | -0.16425413  | 4.211346582 | -2.259118203 | 0.049038169 | 0.049038169 | -3.720006159 |

|              |              |             |              |             |             |              |
|--------------|--------------|-------------|--------------|-------------|-------------|--------------|
| 1441125_at   | 0.25608554   | 5.684569667 | 2.25899882   | 0.049047895 | 0.049047895 | -3.720164449 |
| 1443125_at   | 0.262357617  | 5.219382023 | 2.258938026  | 0.049052849 | 0.049052849 | -3.720245056 |
| 1439140_at   | -0.183679498 | 4.897592008 | -2.258835396 | 0.049061213 | 0.049061213 | -3.720381131 |
| 1455316_x_at | 0.278555258  | 12.94041165 | 2.258464336  | 0.049091464 | 0.049091464 | -3.720873107 |
| 1427193_at   | -0.209898478 | 6.875680895 | -2.258104907 | 0.049120784 | 0.049120784 | -3.721349647 |
| 1426007_a_at | -0.232803616 | 4.860843241 | -2.257464557 | 0.049173062 | 0.049173062 | -3.722198608 |
| 1432484_at   | -0.230113409 | 4.018652881 | -2.257286318 | 0.049187623 | 0.049187623 | -3.722434906 |
| 1460613_x_at | 0.247101731  | 3.981583914 | 2.257280077  | 0.049188133 | 0.049188133 | -3.72244318  |
| 1458399_at   | 0.197965224  | 5.354830597 | 2.256056789  | 0.049288183 | 0.049288183 | -3.724064851 |
| 1443943_at   | 0.305462734  | 4.17921592  | 2.255812544  | 0.049308183 | 0.049308183 | -3.72438862  |
| 1450923_at   | 0.186310732  | 8.853862593 | 2.255596734  | 0.049325861 | 0.049325861 | -3.724674691 |
| 1449455_at   | 0.311759386  | 6.14782443  | 2.25537664   | 0.049343896 | 0.049343896 | -3.724966436 |
| 1457204_at   | -0.17250036  | 5.987569112 | -2.255321716 | 0.049348398 | 0.049348398 | -3.72503924  |
| 1425858_at   | -0.175480401 | 6.603366719 | -2.255186311 | 0.049359498 | 0.049359498 | -3.725218722 |
| 1436966_at   | 0.178479791  | 6.459817479 | 2.254260879  | 0.049435425 | 0.049435425 | -3.726445356 |
| 1452907_at   | -0.848720381 | 5.713921354 | -2.252962768 | 0.049542122 | 0.049542122 | -3.728165819 |
| 1423495_at   | 0.214301987  | 7.25048996  | 2.252836063  | 0.049552548 | 0.049552548 | -3.72833374  |
| 1417843_s_at | -0.195124681 | 6.519372849 | -2.252734064 | 0.049560943 | 0.049560943 | -3.728468916 |
| 1455338_at   | 0.237955182  | 3.783859149 | 2.252447033  | 0.049584574 | 0.049584574 | -3.728849305 |
| 1421028_a_at | -0.221845137 | 8.774278115 | -2.252259191 | 0.049600045 | 0.049600045 | -3.72909824  |
| 1425545_x_at | -0.46108192  | 8.838909974 | -2.25198436  | 0.049622689 | 0.049622689 | -3.729462448 |
| 1436437_at   | -0.165326884 | 4.851570149 | -2.251618796 | 0.049652824 | 0.049652824 | -3.729946885 |
| 1455176_a_at | 0.372888532  | 7.14845303  | 2.251577812  | 0.049656203 | 0.049656203 | -3.730001195 |
| 1419708_at   | 0.243845784  | 6.367682685 | 2.25084372   | 0.049716776 | 0.049716776 | -3.730973952 |
| 1459662_at   | -0.176002305 | 3.322150954 | -2.25076847  | 0.049722989 | 0.049722989 | -3.731073663 |
| 1416263_at   | -0.163530956 | 3.811965996 | -2.25041286  | 0.049752361 | 0.049752361 | -3.731544866 |
| 1444000_at   | -0.199793019 | 6.097861817 | -2.250406054 | 0.049752924 | 0.049752924 | -3.731553884 |
| 1419004_s_at | 0.288469362  | 6.582602237 | 2.250151616  | 0.04977395  | 0.04977395  | -3.73189102  |
| 1455114_at   | -0.559306835 | 7.851506112 | -2.249860791 | 0.049797994 | 0.049797994 | -3.732276361 |
| 1425066_a_at | 0.147292069  | 7.355813535 | 2.24945818   | 0.049831298 | 0.049831298 | -3.732809804 |
| 1421882_a_at | 0.857951248  | 7.266400198 | 2.249426532  | 0.049833917 | 0.049833917 | -3.732851735 |
| 1448602_at   | -0.308416431 | 5.225422191 | -2.249424692 | 0.049834069 | 0.049834069 | -3.732854173 |
| 1440503_at   | 0.199739966  | 3.770790684 | 2.249266871  | 0.049847131 | 0.049847131 | -3.733063274 |
| 1455238_at   | -0.196598424 | 9.137142088 | -2.249032322 | 0.049866549 | 0.049866549 | -3.73337403  |
| 1418049_at   | -0.201258247 | 10.05109983 | -2.248404722 | 0.049918544 | 0.049918544 | -3.734205512 |
| 1416878_at   | 0.14741225   | 5.482542834 | 2.248305991  | 0.049926728 | 0.049926728 | -3.734336314 |
| 1446332_at   | -0.491272708 | 5.770844277 | -2.247815898 | 0.049967374 | 0.049967374 | -3.734985586 |
| 1443930_at   | 0.288303044  | 5.947845043 | 2.247711533  | 0.049976034 | 0.049976034 | -3.735123845 |
| 1422138_at   | -0.16311808  | 4.295981184 | -2.247559217 | 0.049988675 | 0.049988675 | -3.735325626 |
| 1455396_at   | -0.33159672  | 5.746881731 | -2.24718165  | 0.050020023 | 0.050020023 | -3.735825797 |
| 1452823_at   | 0.181144775  | 7.816865416 | 2.246947458  | 0.050039477 | 0.050039477 | -3.73613603  |
| 1419170_at   | 0.180049131  | 9.46746909  | 2.246797329  | 0.050051952 | 0.050051952 | -3.736334901 |
| 1435878_at   | 0.179114907  | 7.13600321  | 2.246272732  | 0.050095567 | 0.050095567 | -3.737029801 |
| 1444161_at   | -0.176352036 | 3.972758282 | -2.245972063 | 0.050120582 | 0.050120582 | -3.737428066 |
| 1440868_at   | 0.40087047   | 6.830969292 | 2.2459332    | 0.050123816 | 0.050123816 | -3.737479543 |
| 1458644_at   | -0.248331213 | 4.417504838 | -2.245927242 | 0.050124312 | 0.050124312 | -3.737487435 |
| 1447405_at   | -0.162486871 | 3.298688372 | -2.245507112 | 0.050159287 | 0.050159287 | -3.738043919 |
| 1431294_at   | -0.155557463 | 4.935361591 | -2.245462451 | 0.050163007 | 0.050163007 | -3.738103074 |
| 1450790_at   | -0.172300615 | 4.521597579 | -2.24543801  | 0.050165043 | 0.050165043 | -3.738135446 |
| 1442856_at   | -0.190567453 | 5.959764766 | -2.245330089 | 0.050174032 | 0.050174032 | -3.73827839  |
| 1453801_at   | 0.205006636  | 3.460401357 | 2.24525614   | 0.050180192 | 0.050180192 | -3.738376336 |
| 1434308_at   | -0.174109214 | 4.328875057 | -2.245023906 | 0.050199544 | 0.050199544 | -3.738683928 |
| 1420210_at   | -0.24216787  | 3.841804196 | -2.244741749 | 0.050223065 | 0.050223065 | -3.739057636 |

|              |              |             |              |             |             |              |
|--------------|--------------|-------------|--------------|-------------|-------------|--------------|
| 1449361_at   | -0.197943413 | 3.755675149 | -2.244575166 | 0.050236957 | 0.050236957 | -3.739278265 |
| 1439195_at   | 0.198849214  | 6.86158304  | 2.243980443  | 0.050286583 | 0.050286583 | -3.740065919 |
| 1440890_a_at | 0.177871211  | 7.851460364 | 2.243804267  | 0.050301293 | 0.050301293 | -3.740299239 |
| 1450610_at   | -0.204880472 | 4.065013182 | -2.243007096 | 0.050367906 | 0.050367906 | -3.741354942 |
| 1444172_at   | -0.153093759 | 3.946046906 | -2.24270121  | 0.05039349  | 0.05039349  | -3.741760014 |
| 1453103_at   | 0.297281344  | 7.28560739  | 2.242560671  | 0.050405248 | 0.050405248 | -3.741946119 |
| 1449754_at   | -0.17160547  | 3.913552883 | -2.242397014 | 0.050418944 | 0.050418944 | -3.742162836 |
| 1428942_at   | -0.259539979 | 8.423133586 | -2.241982231 | 0.050453672 | 0.050453672 | -3.742712086 |
| 1429551_at   | -0.16803494  | 5.433645257 | -2.241937633 | 0.050457408 | 0.050457408 | -3.742771141 |
| 1434353_at   | -0.277500478 | 5.818440558 | -2.241708873 | 0.050476572 | 0.050476572 | -3.743074052 |
| 1448053_at   | 0.161678035  | 3.617606135 | 2.241338052  | 0.050507653 | 0.050507653 | -3.743565063 |
| 1427427_at   | 0.258059466  | 5.542452629 | 2.24121326   | 0.050518117 | 0.050518117 | -3.743730299 |
| 1457113_at   | -0.241436162 | 6.433175364 | -2.240856966 | 0.050548004 | 0.050548004 | -3.744202054 |
| 1443970_at   | 0.133456975  | 4.947673633 | 2.240506245  | 0.05057744  | 0.05057744  | -3.744666418 |
| 1456069_at   | -0.251891902 | 4.432094469 | -2.240230746 | 0.050600574 | 0.050600574 | -3.745031177 |
| 1422043_at   | 0.226713089  | 5.582754972 | 2.239999673  | 0.050619986 | 0.050619986 | -3.745337111 |
| 1431704_a_at | 0.168905172  | 6.626188042 | 2.239978253  | 0.050621786 | 0.050621786 | -3.74536547  |
| 1458662_at   | -0.262750687 | 8.556565051 | -2.239642686 | 0.05064999  | 0.05064999  | -3.745809739 |
| 1441069_at   | 0.239760492  | 5.539047923 | 2.239642653  | 0.050649993 | 0.050649993 | -3.745809782 |
| 1426569_a_at | 0.216083622  | 7.61225426  | 2.239493073  | 0.05066257  | 0.05066257  | -3.746007813 |
| 1430974_a_at | 0.248024297  | 5.867953468 | 2.239369048  | 0.050673    | 0.050673    | -3.746172009 |
| 1456180_at   | -0.336732153 | 5.795459796 | -2.238323215 | 0.050761039 | 0.050761039 | -3.747556517 |
| 1417079_s_at | -0.256649572 | 4.971029754 | -2.237923724 | 0.050794707 | 0.050794707 | -3.748085346 |
| 1431148_at   | -0.157410096 | 5.075243352 | -2.237651287 | 0.05081768  | 0.05081768  | -3.748445976 |
| 1451941_a_at | 0.648296304  | 5.944361326 | 2.237536381  | 0.050827372 | 0.050827372 | -3.748598077 |
| 1444805_at   | -0.155356799 | 3.744240004 | -2.237306074 | 0.050846804 | 0.050846804 | -3.74890293  |
| 1427542_at   | 0.237899929  | 7.010282471 | 2.237144715  | 0.050860423 | 0.050860423 | -3.749116515 |
| 1436424_at   | 0.167852704  | 9.040581374 | 2.237058866  | 0.05086767  | 0.05086767  | -3.749230149 |
| 1439585_at   | 0.172294409  | 4.002560852 | 2.236607207  | 0.050905815 | 0.050905815 | -3.749827974 |
| 1458842_at   | -0.34213047  | 6.677058992 | -2.236586974 | 0.050907524 | 0.050907524 | -3.749854754 |
| 1421358_at   | -0.229750778 | 6.04314086  | -2.236190403 | 0.05094104  | 0.05094104  | -3.750379645 |
| 1452473_at   | -0.317800762 | 5.453301314 | -2.236070686 | 0.050951162 | 0.050951162 | -3.750538095 |
| 1436985_at   | 0.164170336  | 9.309274106 | 2.235945313  | 0.050961765 | 0.050961765 | -3.75070403  |
| 1445039_at   | -0.162469283 | 4.414727786 | -2.235802234 | 0.050973867 | 0.050973867 | -3.750893398 |
| 1420243_at   | -0.201601313 | 3.836805994 | -2.235654426 | 0.050986372 | 0.050986372 | -3.751089022 |
| 1422340_a_at | 0.201040364  | 6.005465238 | 2.235620434  | 0.050989249 | 0.050989249 | -3.75113401  |
| 1419143_at   | -0.150852341 | 3.447856569 | -2.235021955 | 0.051039916 | 0.051039916 | -3.751926072 |
| 1429862_at   | -0.203498421 | 5.655762126 | -2.23486554  | 0.051053167 | 0.051053167 | -3.752133074 |
| 1428462_at   | -0.287759611 | 5.029391116 | -2.234840817 | 0.051055261 | 0.051055261 | -3.752165792 |
| 1429225_at   | 0.33392331   | 4.219873058 | 2.234609979  | 0.051074823 | 0.051074823 | -3.752471283 |
| 1426628_at   | 0.180698492  | 9.865279459 | 2.234325252  | 0.051098961 | 0.051098961 | -3.752848081 |
| 1441270_at   | -0.18048393  | 5.463891146 | -2.234151645 | 0.051113685 | 0.051113685 | -3.753077822 |
| 1454048_a_at | -0.194047371 | 5.350997113 | -2.234029813 | 0.05112402  | 0.05112402  | -3.753239045 |
| 1454837_at   | -0.214686935 | 7.675135776 | -2.233442799 | 0.051173844 | 0.051173844 | -3.754015833 |
| 1417512_at   | 0.143468445  | 8.949707404 | 2.233151596  | 0.051198578 | 0.051198578 | -3.754401165 |
| 1433521_at   | 0.140234378  | 8.925663458 | 2.232938408  | 0.051216693 | 0.051216693 | -3.754683259 |
| 1447188_at   | -0.159298266 | 4.305601798 | -2.232551668 | 0.051249571 | 0.051249571 | -3.755194985 |
| 1458956_at   | 0.197257211  | 4.149397905 | 2.23246184   | 0.051257211 | 0.051257211 | -3.755313841 |
| 1423137_at   | 0.206856207  | 9.59088303  | 2.231967625  | 0.051299262 | 0.051299262 | -3.75596775  |
| 1447692_x_at | 0.135821431  | 3.212257594 | 2.231759951  | 0.051316942 | 0.051316942 | -3.75624252  |
| 1425452_s_at | 0.154729886  | 7.492460723 | 2.231437419  | 0.051344412 | 0.051344412 | -3.756669248 |
| 1428604_at   | 0.381522637  | 3.613633565 | 2.231306937  | 0.05135553  | 0.05135553  | -3.75684188  |
| 1436126_at   | -0.628245313 | 6.773838253 | -2.231089181 | 0.051374088 | 0.051374088 | -3.757129975 |



|              |              |             |              |             |             |              |
|--------------|--------------|-------------|--------------|-------------|-------------|--------------|
| 1422647_at   | 0.147112518  | 6.911396255 | 2.230816712  | 0.051397319 | 0.051397319 | -3.757490448 |
| 1459808_at   | -0.162798146 | 5.034186243 | -2.230454217 | 0.051428241 | 0.051428241 | -3.757970011 |
| 1428751_at   | -0.456680334 | 5.825809213 | -2.230364893 | 0.051435863 | 0.051435863 | -3.758088181 |
| 1448991_a_at | 0.979261147  | 6.942044743 | 2.230323748  | 0.051439375 | 0.051439375 | -3.758142611 |
| 1418537_at   | -0.191194367 | 5.54402262  | -2.23020425  | 0.051449575 | 0.051449575 | -3.758300697 |
| 1444148_at   | -0.189117795 | 5.079722029 | -2.230197607 | 0.051450142 | 0.051450142 | -3.758309486 |
| 1418030_at   | 0.213105491  | 7.214451912 | 2.230178839  | 0.051451744 | 0.051451744 | -3.758334314 |
| 1455053_a_at | 0.155760743  | 4.327649042 | 2.229777792  | 0.051485991 | 0.051485991 | -3.758864852 |
| 1430930_at   | -0.171653911 | 5.462800708 | -2.229052446 | 0.051547987 | 0.051547987 | -3.759824353 |
| 1420294_at   | -0.158791969 | 3.730353733 | -2.229036798 | 0.051549326 | 0.051549326 | -3.759845051 |
| 1425675_s_at | 0.156186036  | 5.387272916 | 2.228946084  | 0.051557084 | 0.051557084 | -3.759965046 |
| 1437771_at   | 0.204837972  | 5.359126132 | 2.228593247  | 0.051587273 | 0.051587273 | -3.76043176  |
| 1431856_a_at | -0.262193066 | 7.323456918 | -2.22825758  | 0.051616009 | 0.051616009 | -3.760875752 |
| 1437318_at   | -0.191942028 | 8.408482827 | -2.228186872 | 0.051622064 | 0.051622064 | -3.760969276 |
| 1443660_at   | 0.169409282  | 3.55946132  | 2.227935288  | 0.051643615 | 0.051643615 | -3.761302039 |
| 1458341_x_at | 0.238507414  | 7.76980786  | 2.227569334  | 0.051674977 | 0.051674977 | -3.761786064 |
| 1423666_s_at | 0.149126287  | 8.985877561 | 2.227326985  | 0.051695757 | 0.051695757 | -3.762106596 |
| 1451527_at   | -0.31464673  | 8.191409293 | -2.226887003 | 0.051733503 | 0.051733503 | -3.762688501 |
| 1432719_at   | 0.209989158  | 7.163493921 | 2.22681187   | 0.051739952 | 0.051739952 | -3.762787868 |
| 1419924_at   | -0.270544859 | 5.804293051 | -2.226653566 | 0.051753541 | 0.051753541 | -3.762997229 |
| 1419138_at   | 0.155347899  | 6.730855128 | 2.226500458  | 0.051766688 | 0.051766688 | -3.763199715 |
| 1454262_at   | 0.152989523  | 4.09786686  | 2.226450593  | 0.05177097  | 0.05177097  | -3.763265662 |
| 1460086_at   | 0.403833678  | 7.427415184 | 2.225952057  | 0.051813802 | 0.051813802 | -3.763924959 |
| 1424799_a_at | 0.195181877  | 4.770544244 | 2.225530443  | 0.051850052 | 0.051850052 | -3.764482508 |
| 1424990_at   | -0.197556296 | 7.011386964 | -2.225068088 | 0.051889834 | 0.051889834 | -3.765093912 |
| 1453908_at   | 0.179043736  | 4.072159658 | 2.224998262  | 0.051895844 | 0.051895844 | -3.765186246 |
| 1450843_a_at | -0.168678181 | 12.46021452 | -2.224619762 | 0.051928437 | 0.051928437 | -3.765686742 |
| 1425287_at   | 0.193209166  | 5.256077444 | 2.224351978  | 0.051951507 | 0.051951507 | -3.766040827 |
| 1429003_at   | 0.29066262   | 8.422932639 | 2.224243198  | 0.051960882 | 0.051960882 | -3.766184661 |
| 1433235_at   | -0.148098548 | 3.465509422 | -2.223971778 | 0.05198428  | 0.05198428  | -3.766543543 |
| 1456275_at   | -0.197942691 | 5.611273833 | -2.223552719 | 0.052020426 | 0.052020426 | -3.767097621 |
| 1432673_at   | 0.519177841  | 5.852397742 | 2.223325309  | 0.052040051 | 0.052040051 | -3.767398295 |
| 1448741_at   | -0.161614805 | 4.453009751 | -2.223310626 | 0.052041319 | 0.052041319 | -3.767417707 |
| 1455451_at   | -0.284559792 | 5.212656461 | -2.223262851 | 0.052045443 | 0.052045443 | -3.767480873 |
| 1442229_at   | 0.241769525  | 9.521994318 | 2.223149342  | 0.052055242 | 0.052055242 | -3.767630947 |
| 1438480_a_at | -0.158006214 | 8.434877889 | -2.22301131  | 0.052067161 | 0.052067161 | -3.767813443 |
| 1422159_at   | -0.285320865 | 3.857620377 | -2.222439538 | 0.052116561 | 0.052116561 | -3.768569372 |
| 1426604_at   | 0.248275703  | 7.437333251 | 2.222358021  | 0.052123608 | 0.052123608 | -3.768677141 |
| 1430654_at   | 0.195536522  | 3.694213491 | 2.222217897  | 0.052135723 | 0.052135723 | -3.76886239  |
| 1432362_at   | -0.153255646 | 6.360252971 | -2.222007214 | 0.052153944 | 0.052153944 | -3.769140917 |
| 1450832_at   | -0.174448663 | 4.067588048 | -2.222004316 | 0.052154195 | 0.052154195 | -3.769144747 |
| 1450407_a_at | -0.428365892 | 9.387547444 | -2.221992955 | 0.052155177 | 0.052155177 | -3.769159767 |
| 1454591_at   | -0.234031935 | 4.737608095 | -2.221947677 | 0.052159094 | 0.052159094 | -3.769219623 |
| 1439756_at   | -0.230904969 | 4.249875078 | -2.22182644  | 0.052169583 | 0.052169583 | -3.769379898 |
| 1445371_at   | -0.192021308 | 3.733060021 | -2.22171641  | 0.052179104 | 0.052179104 | -3.769525355 |
| 1424563_at   | -0.191677019 | 4.366815289 | -2.221460676 | 0.05220124  | 0.05220124  | -3.769863423 |
| 1449324_at   | 0.156575713  | 8.748417077 | 2.220862355  | 0.052253065 | 0.052253065 | -3.770654349 |
| 1456406_at   | -0.166362135 | 5.157621309 | -2.220814699 | 0.052257194 | 0.052257194 | -3.770717344 |
| 1426262_at   | -0.16367986  | 7.00031535  | -2.220128575 | 0.052316691 | 0.052316691 | -3.771624284 |
| 1429630_at   | 0.268790057  | 3.864496927 | 2.219602508  | 0.052362352 | 0.052362352 | -3.772319619 |
| 1431607_at   | -0.174147644 | 3.82849306  | -2.219539557 | 0.052367819 | 0.052367819 | -3.772402824 |
| 1439864_at   | -0.406150981 | 6.412255879 | -2.219509724 | 0.05237041  | 0.05237041  | -3.772442255 |
| 1424922_a_at | 0.199588999  | 8.771468001 | 2.219412908  | 0.052378819 | 0.052378819 | -3.772570218 |

|                    |              |             |              |             |             |              |
|--------------------|--------------|-------------|--------------|-------------|-------------|--------------|
| 1452768_at         | -0.379620062 | 7.864808793 | -2.218898453 | 0.052423523 | 0.052423523 | -3.773250163 |
| 1421124_at         | -0.247327931 | 5.094343038 | -2.218788362 | 0.052433095 | 0.052433095 | -3.773395665 |
| 1452748_at         | -0.189683281 | 6.66995083  | -2.218282763 | 0.052477074 | 0.052477074 | -3.774063872 |
| 1421483_at         | -0.164543043 | 5.01520042  | -2.218042765 | 0.052497963 | 0.052497963 | -3.774381045 |
| AFFX-r2-Bs-dap-5_ç | 0.345374397  | 6.499172438 | 2.217846743  | 0.05251503  | 0.05251503  | -3.774640098 |
| 1416727_a_at       | 0.165586416  | 10.80095768 | 2.216942434  | 0.052593835 | 0.052593835 | -3.775835127 |
| 1453821_at         | 0.205831159  | 7.622983153 | 2.216893953  | 0.052598063 | 0.052598063 | -3.775899192 |
| 1443577_at         | -0.165740976 | 3.486684563 | -2.21650579  | 0.052631927 | 0.052631927 | -3.776412112 |
| 1440425_at         | 0.192131959  | 5.952645033 | 2.216430881  | 0.052638465 | 0.052638465 | -3.776511096 |
| 1438676_at         | 0.198523526  | 3.735011883 | 2.216261696  | 0.052653233 | 0.052653233 | -3.77673465  |
| 1449796_at         | 0.202051975  | 4.523466019 | 2.216007126  | 0.052675463 | 0.052675463 | -3.777071024 |
| 1457708_at         | 0.344595392  | 6.070031393 | 2.21595928   | 0.052679642 | 0.052679642 | -3.777134244 |
| 1423415_at         | -0.375529569 | 5.616872337 | -2.215923011 | 0.05268281  | 0.05268281  | -3.777182168 |
| 1459577_at         | -0.199233497 | 4.374184387 | -2.215365785 | 0.052731506 | 0.052731506 | -3.777918422 |
| 1443569_at         | -0.264946906 | 6.365050228 | -2.214773948 | 0.052783275 | 0.052783275 | -3.778700369 |
| 1416687_at         | -0.141134309 | 10.21205494 | -2.214404334 | 0.05281563  | 0.05281563  | -3.77918869  |
| 1447227_at         | -0.242309631 | 4.231383661 | -2.213837303 | 0.052865305 | 0.052865305 | -3.779937801 |
| 1418781_at         | -0.211891576 | 7.344661408 | -2.213568738 | 0.052888848 | 0.052888848 | -3.780292592 |
| 1451939_a_at       | -0.200077586 | 8.488532599 | -2.213452765 | 0.052899018 | 0.052899018 | -3.780445797 |
| 1455806_x_at       | -0.289390745 | 11.15892625 | -2.21323738  | 0.052917911 | 0.052917911 | -3.780730325 |
| 1449424_at         | 0.242082235  | 5.392080519 | 2.212887408  | 0.052948622 | 0.052948622 | -3.781192635 |
| 1427584_at         | -0.167874611 | 7.500335377 | -2.212507119 | 0.052982014 | 0.052982014 | -3.781694978 |
| 1443167_at         | -0.273749069 | 6.44766307  | -2.212399212 | 0.052991492 | 0.052991492 | -3.781837514 |
| 1443239_at         | 0.243174993  | 3.573104991 | 2.21204998   | 0.05302218  | 0.05302218  | -3.782298812 |
| 1436689_a_at       | 0.165685519  | 9.958169297 | 2.211998113  | 0.05302674  | 0.05302674  | -3.782367322 |
| 1431776_at         | -0.152134644 | 6.007613018 | -2.21199758  | 0.053026786 | 0.053026786 | -3.782368026 |
| 1454425_at         | -0.150497945 | 3.98446709  | -2.211657061 | 0.053056728 | 0.053056728 | -3.7828178   |
| 1448134_at         | -0.141758324 | 8.253782969 | -2.211432303 | 0.0530765   | 0.0530765   | -3.783114664 |
| 1446559_at         | -0.20756434  | 4.416392192 | -2.211361138 | 0.053082761 | 0.053082761 | -3.783208658 |
| 1454274_at         | -0.13989001  | 4.995489337 | -2.210675776 | 0.053143103 | 0.053143103 | -3.784113854 |
| 1458363_at         | -0.159947571 | 4.105153593 | -2.210496809 | 0.053158871 | 0.053158871 | -3.784350216 |
| 1443539_at         | -0.189014188 | 4.620639435 | -2.21035465  | 0.053171399 | 0.053171399 | -3.784537964 |
| 1440315_at         | -0.190776208 | 4.98575929  | -2.210302919 | 0.053175959 | 0.053175959 | -3.784606284 |
| 1425169_at         | -0.195814938 | 4.503010455 | -2.209812565 | 0.053219198 | 0.053219198 | -3.785253866 |
| 1427437_at         | 0.306884606  | 8.378773945 | 2.209674389  | 0.053231389 | 0.053231389 | -3.785436342 |
| 1432268_at         | -0.143326612 | 5.500610096 | -2.209662601 | 0.053232429 | 0.053232429 | -3.78545191  |
| 1443573_at         | 0.193556973  | 5.961266423 | 2.208985621  | 0.053292195 | 0.053292195 | -3.786345902 |
| 1441311_at         | 0.152969345  | 4.187217655 | 2.208756162  | 0.053312468 | 0.053312468 | -3.786648904 |
| 1425982_a_at       | -0.22244353  | 5.090002219 | -2.208616501 | 0.05332481  | 0.05332481  | -3.786833324 |
| 1449594_at         | -0.132398831 | 3.376729583 | -2.208289105 | 0.053353755 | 0.053353755 | -3.787265637 |
| 1458236_at         | -0.198396352 | 4.774292507 | -2.208163856 | 0.053364832 | 0.053364832 | -3.787431019 |
| 1451424_at         | 0.391943564  | 6.527490352 | 2.208120515  | 0.053368665 | 0.053368665 | -3.787488247 |
| 1424287_at         | 0.164308088  | 6.698111185 | 2.207946836  | 0.05338403  | 0.05338403  | -3.787717575 |
| 1456402_at         | 0.411612754  | 5.565835518 | 2.207911893  | 0.053387122 | 0.053387122 | -3.787763714 |
| 1430787_at         | 0.158742356  | 3.604224389 | 2.207853571  | 0.053392283 | 0.053392283 | -3.787840721 |
| 1416784_at         | 0.160624341  | 3.464617334 | 2.207349804  | 0.053436881 | 0.053436881 | -3.788505874 |
| 1422592_at         | 0.311554704  | 6.961352169 | 2.207130106  | 0.053456342 | 0.053456342 | -3.788795945 |
| 1420913_at         | 0.19173031   | 7.279924949 | 2.206966314  | 0.053470855 | 0.053470855 | -3.789012199 |
| 1458654_at         | -0.165810533 | 3.448913457 | -2.206896211 | 0.053477068 | 0.053477068 | -3.789104754 |
| 1436672_at         | 0.269487967  | 4.620331442 | 2.20689046   | 0.053477578 | 0.053477578 | -3.789112348 |
| 1454256_s_at       | -0.225517263 | 6.721974222 | -2.206646245 | 0.053499227 | 0.053499227 | -3.789434775 |
| 1419199_at         | 0.26076932   | 4.421638674 | 2.206643074  | 0.053499508 | 0.053499508 | -3.789438961 |
| 1434720_at         | -0.175586826 | 5.702181473 | -2.206392624 | 0.053521719 | 0.053521719 | -3.789769613 |

|              |              |             |              |             |             |              |
|--------------|--------------|-------------|--------------|-------------|-------------|--------------|
| 1418073_at   | 0.142078275  | 8.914181322 | 2.205416598  | 0.053608361 | 0.053608361 | -3.791058124 |
| 1428499_at   | -0.148083609 | 6.514067722 | -2.20524748  | 0.053623388 | 0.053623388 | -3.791281376 |
| 1418450_at   | -0.203604316 | 10.01216153 | -2.205133057 | 0.053633557 | 0.053633557 | -3.791432423 |
| 1421726_at   | -0.155890377 | 5.905612534 | -2.204581507 | 0.053682601 | 0.053682601 | -3.792160489 |
| 1430555_s_at | 0.234780531  | 8.924403212 | 2.204573902  | 0.053683278 | 0.053683278 | -3.792170527 |
| 1430600_at   | 0.142667183  | 5.005683467 | 2.20427932   | 0.05370949  | 0.05370949  | -3.792559372 |
| 1442296_at   | -0.148334244 | 6.915459842 | -2.2041512   | 0.053720895 | 0.053720895 | -3.792728485 |
| 1459123_at   | -0.168296099 | 3.774281634 | -2.204079885 | 0.053727244 | 0.053727244 | -3.792822618 |
| 1419014_at   | 0.157976672  | 3.448431305 | 2.204023615  | 0.053732254 | 0.053732254 | -3.792896891 |
| 1457393_at   | 0.193755141  | 5.812821962 | 2.203864508  | 0.053746422 | 0.053746422 | -3.793106902 |
| 1429253_at   | 0.161821101  | 9.209532038 | 2.203557748  | 0.05377375  | 0.05377375  | -3.793511794 |
| 1424797_a_at | 0.529256868  | 9.612550612 | 2.20332339   | 0.053794637 | 0.053794637 | -3.793821116 |
| 1437933_at   | -0.202772431 | 7.890716493 | -2.203125944 | 0.05381224  | 0.05381224  | -3.794081714 |
| 1417877_at   | 0.215863853  | 6.367822809 | 2.202945093  | 0.053828368 | 0.053828368 | -3.794320405 |
| 1433045_at   | -0.177261889 | 4.768007756 | -2.202524103 | 0.053865931 | 0.053865931 | -3.794876023 |
| 1450258_a_at | 0.633866619  | 5.177521669 | 2.202147776  | 0.05389953  | 0.05389953  | -3.795372677 |
| 1442997_at   | 0.150152354  | 6.924426003 | 2.201885867  | 0.053922926 | 0.053922926 | -3.795718318 |
| 1431335_a_at | -0.17785646  | 5.88301371  | -2.201862198 | 0.053925041 | 0.053925041 | -3.795749553 |
| 1419719_at   | 0.299931241  | 6.263619185 | 2.201757523  | 0.053934394 | 0.053934394 | -3.795887691 |
| 1429685_at   | 0.43539999   | 5.502897973 | 2.201469239  | 0.053960163 | 0.053960163 | -3.796268126 |
| 1454902_at   | 0.22973259   | 4.914612379 | 2.201401334  | 0.053966234 | 0.053966234 | -3.796357736 |
| 1446397_at   | 0.194090406  | 6.871416664 | 2.200910647  | 0.054010127 | 0.054010127 | -3.797005246 |
| 1451079_at   | -0.372214385 | 6.348929477 | -2.200752508 | 0.05402428  | 0.05402428  | -3.79721392  |
| 1459053_at   | -0.263478501 | 5.070048809 | -2.200689347 | 0.054029934 | 0.054029934 | -3.797297264 |
| 1439876_at   | 0.164704901  | 5.301102299 | 2.200510146  | 0.054045978 | 0.054045978 | -3.797533726 |
| 1423328_at   | 0.519511336  | 5.269480888 | 2.20027199   | 0.054067307 | 0.054067307 | -3.797847974 |
| 1448918_at   | 0.185493542  | 7.209118229 | 2.20023511   | 0.054070611 | 0.054070611 | -3.797896637 |
| 1418464_at   | -0.430825312 | 7.78546399  | -2.200090705 | 0.054083549 | 0.054083549 | -3.798087177 |
| 1444239_at   | 0.225595643  | 6.533906887 | 2.199866222  | 0.054103667 | 0.054103667 | -3.798383374 |
| 1426450_at   | -0.15959389  | 8.067168962 | -2.199583428 | 0.054129022 | 0.054129022 | -3.7987565   |
| 1457359_at   | 0.322329564  | 6.510618524 | 2.199098211  | 0.054172552 | 0.054172552 | -3.799396687 |
| 1425291_at   | -0.404318898 | 8.001351609 | -2.198742135 | 0.054204518 | 0.054204518 | -3.79986647  |
| 1437410_at   | 0.154506246  | 6.949688115 | 2.198739713  | 0.054204736 | 0.054204736 | -3.799869666 |
| 1454024_at   | -0.168900286 | 3.875153221 | -2.19873134  | 0.054205487 | 0.054205487 | -3.799880712 |
| 1449270_at   | 0.272619557  | 6.014168554 | 2.198667839  | 0.05421119  | 0.05421119  | -3.799964489 |
| 1450540_x_at | -0.131338538 | 6.016418311 | -2.198176471 | 0.054255337 | 0.054255337 | -3.800612737 |
| 1453953_at   | -0.209550835 | 4.426863427 | -2.198050818 | 0.054266632 | 0.054266632 | -3.800778504 |
| 1426535_at   | 0.157334031  | 8.90200985  | 2.197631415  | 0.054304348 | 0.054304348 | -3.801331782 |
| 1443085_at   | 0.169584524  | 5.777753808 | 2.197545083  | 0.054312115 | 0.054312115 | -3.801445668 |
| 1446678_at   | -0.235731585 | 4.486649672 | -2.197211309 | 0.054342154 | 0.054342154 | -3.801885967 |
| 1427710_at   | -0.175738343 | 6.152034495 | -2.197072417 | 0.054354658 | 0.054354658 | -3.802069181 |
| 1458739_at   | 0.401964306  | 7.00745575  | 2.196734233  | 0.054385117 | 0.054385117 | -3.802515276 |
| 1419971_s_at | 0.289298703  | 7.500972842 | 2.196539371  | 0.054402674 | 0.054402674 | -3.802772312 |
| 1432382_at   | -0.157392954 | 3.561249493 | -2.196487622 | 0.054407338 | 0.054407338 | -3.80284057  |
| 1440153_at   | 0.301555659  | 6.366882425 | 2.196463465  | 0.054409515 | 0.054409515 | -3.802872434 |
| 1445699_at   | -0.175532896 | 4.079620862 | -2.196274242 | 0.054426572 | 0.054426572 | -3.803122024 |
| 1436605_at   | -0.212584249 | 5.419196019 | -2.196228969 | 0.054430654 | 0.054430654 | -3.80318174  |
| 1449747_at   | -0.166323664 | 6.326792888 | -2.195819961 | 0.054467543 | 0.054467543 | -3.803721216 |
| 1445161_at   | -0.151884838 | 7.0956863   | -2.195293203 | 0.054515088 | 0.054515088 | -3.804415972 |
| 1458368_at   | -0.16206036  | 3.743069972 | -2.195086897 | 0.05453372  | 0.05453372  | -3.804688066 |
| 1442097_at   | -0.199589317 | 3.267850786 | -2.194864265 | 0.054553833 | 0.054553833 | -3.804981685 |
| 1444403_at   | 0.207929686  | 5.693004458 | 2.194607277  | 0.05457706  | 0.05457706  | -3.80532061  |
| 1455542_at   | 0.232188577  | 6.398078766 | 2.194488919  | 0.05458776  | 0.05458776  | -3.805476701 |

|              |              |             |              |             |             |              |
|--------------|--------------|-------------|--------------|-------------|-------------|--------------|
| 1422197_at   | -0.210715525 | 4.816973636 | -2.194002362 | 0.054631769 | 0.054631769 | -3.806118357 |
| 1431518_at   | -0.159573681 | 4.452056657 | -2.193997662 | 0.054632194 | 0.054632194 | -3.806124555 |
| 1439974_at   | 0.170128873  | 4.485634334 | 2.193978389  | 0.054633938 | 0.054633938 | -3.806149971 |
| 1417853_at   | 0.186832183  | 3.603033701 | 2.193976934  | 0.05463407  | 0.05463407  | -3.806151889 |
| 1425518_at   | 0.211378648  | 4.570778786 | 2.193599521  | 0.054668232 | 0.054668232 | -3.80664959  |
| 1450482_a_at | 0.549739368  | 7.901103295 | 2.193549517  | 0.05467276  | 0.05467276  | -3.80671553  |
| 1439033_at   | 0.156974648  | 8.381676139 | 2.193316759  | 0.05469384  | 0.05469384  | -3.807022461 |
| 1442447_at   | -0.36164515  | 7.754570349 | -2.193151583 | 0.054708804 | 0.054708804 | -3.80724027  |
| 1434321_at   | -0.155991721 | 6.149342448 | -2.193115976 | 0.054712031 | 0.054712031 | -3.807287222 |
| 1432069_at   | 0.145393062  | 4.243032456 | 2.192763947  | 0.054743938 | 0.054743938 | -3.807751411 |
| 1423933_a_at | -0.790021164 | 6.036058542 | -2.19255028  | 0.054763314 | 0.054763314 | -3.808033148 |
| 1452946_a_at | -0.206573022 | 7.762109393 | -2.192373541 | 0.054779346 | 0.054779346 | -3.808266188 |
| 1441216_at   | -0.243715754 | 5.68336361  | -2.192371609 | 0.054779521 | 0.054779521 | -3.808268735 |
| 1439666_at   | -0.176319804 | 5.532723685 | -2.191901888 | 0.054822151 | 0.054822151 | -3.808888069 |
| 1455329_at   | -0.218540656 | 5.865917179 | -2.191764005 | 0.054834671 | 0.054834671 | -3.809069863 |
| 1419993_at   | -0.19133824  | 4.02561297  | -2.191682443 | 0.054842078 | 0.054842078 | -3.809177401 |
| 1456827_at   | 0.375771184  | 6.083020497 | 2.191386096  | 0.054869    | 0.054869    | -3.809568116 |
| 1455269_a_at | 0.301014674  | 7.076506458 | 2.191259344  | 0.054880518 | 0.054880518 | -3.809735227 |
| 1445730_at   | -0.172359157 | 3.756283967 | -2.190521781 | 0.054947591 | 0.054947591 | -3.810707602 |
| 1451868_at   | -0.196261877 | 4.38227308  | -2.190201622 | 0.054976731 | 0.054976731 | -3.811129666 |
| 1458225_at   | 0.189348677  | 4.268604979 | 2.190154848  | 0.054980989 | 0.054980989 | -3.811191327 |
| 1443615_at   | -0.217392609 | 5.107733347 | -2.189849516 | 0.055008795 | 0.055008795 | -3.811593832 |
| 1455094_s_at | 0.175169404  | 7.903913758 | 2.189539625  | 0.05503703  | 0.05503703  | -3.812002334 |
| 1418580_at   | 0.255251825  | 6.823231559 | 2.188715127  | 0.055112221 | 0.055112221 | -3.813089142 |
| 1428013_at   | 0.172111175  | 7.794656891 | 2.188657835  | 0.055117449 | 0.055117449 | -3.813164659 |
| 1415865_s_at | 0.201058539  | 8.375088287 | 2.188438973  | 0.055137427 | 0.055137427 | -3.813453134 |
| 1424101_at   | -0.261727878 | 9.32290402  | -2.187998844 | 0.055177624 | 0.055177624 | -3.814033239 |
| 1458750_at   | -0.211350191 | 4.106901788 | -2.187869365 | 0.055189454 | 0.055189454 | -3.814203891 |
| 1452657_at   | -0.165327142 | 8.752017924 | -2.187865651 | 0.055189794 | 0.055189794 | -3.814208786 |
| 1425664_at   | -0.142344311 | 5.056072127 | -2.187368384 | 0.055235252 | 0.055235252 | -3.814864164 |
| 1439922_at   | -0.189605507 | 6.509865681 | -2.187345658 | 0.055237331 | 0.055237331 | -3.814894114 |
| 1434299_x_at | 0.232500666  | 8.253437685 | 2.18729172   | 0.055242264 | 0.055242264 | -3.8149652   |
| 1456112_at   | 0.169560146  | 9.456015569 | 2.187176492  | 0.055252804 | 0.055252804 | -3.815117061 |
| 1419658_at   | 0.160259651  | 3.883132114 | 2.18686858   | 0.05528098  | 0.05528098  | -3.815522853 |
| 1459145_at   | 0.144420624  | 7.186837935 | 2.18675918   | 0.055290993 | 0.055290993 | -3.815667027 |
| 1457453_at   | -0.147846392 | 4.109991509 | -2.186491369 | 0.055315515 | 0.055315515 | -3.816019958 |
| 1455796_x_at | 0.323947493  | 5.973299469 | 2.18629682   | 0.055333335 | 0.055333335 | -3.816276336 |
| 1456115_at   | -0.201204955 | 4.09103413  | -2.186192873 | 0.055342858 | 0.055342858 | -3.816413316 |
| 1441321_at   | 0.197078067  | 6.126241465 | 2.186041014  | 0.055356774 | 0.055356774 | -3.816613432 |
| 1456182_x_at | 0.156959726  | 3.315212073 | 2.185878475  | 0.055371673 | 0.055371673 | -3.816827618 |
| 1447452_at   | -0.183954098 | 4.35939497  | -2.185530784 | 0.055403555 | 0.055403555 | -3.817285778 |
| 1443746_x_at | -0.84683432  | 8.0557586   | -2.185528389 | 0.055403775 | 0.055403775 | -3.817288933 |
| 1441729_at   | -0.196356605 | 4.404832181 | -2.185226676 | 0.055431456 | 0.055431456 | -3.817686495 |
| 1425207_at   | -0.207199827 | 3.840946453 | -2.184858704 | 0.055465234 | 0.055465234 | -3.818171349 |
| 1451878_a_at | 0.173373586  | 4.11607073  | 2.184834008  | 0.055467502 | 0.055467502 | -3.818203888 |
| 1435625_at   | -0.260551989 | 5.856645886 | -2.184698277 | 0.055479967 | 0.055479967 | -3.818382729 |
| 1453218_at   | 0.188686311  | 3.564920392 | 2.18432116   | 0.055514614 | 0.055514614 | -3.818879608 |
| 1438880_at   | 0.199081197  | 7.02615408  | 2.184041859  | 0.055540288 | 0.055540288 | -3.819247595 |
| 1459359_at   | 0.155555395  | 3.477955717 | 2.183869596  | 0.055556128 | 0.055556128 | -3.819474553 |
| 1456623_at   | 0.271232168  | 9.570381026 | 2.183243772  | 0.055613713 | 0.055613713 | -3.820299047 |
| 1449084_s_at | 0.351110879  | 9.092075931 | 2.183054351  | 0.055631154 | 0.055631154 | -3.820548589 |
| 1419341_at   | -0.16800603  | 4.958016296 | -2.182917474 | 0.05564376  | 0.05564376  | -3.82072891  |
| 1449629_s_at | 0.135704085  | 7.458033731 | 2.182857716  | 0.055649265 | 0.055649265 | -3.820807633 |

|              |              |             |              |             |             |              |
|--------------|--------------|-------------|--------------|-------------|-------------|--------------|
| 1452734_at   | -0.175917866 | 11.20484605 | -2.182392665 | 0.05569212  | 0.05569212  | -3.821420262 |
| 1449071_at   | 0.154150084  | 4.136790679 | 2.182296888  | 0.05570095  | 0.05570095  | -3.821546429 |
| 1442440_at   | -0.137557418 | 3.522997561 | -2.18217397  | 0.055712284 | 0.055712284 | -3.821708348 |
| 1449177_at   | -0.423009327 | 5.309085147 | -2.182153447 | 0.055714177 | 0.055714177 | -3.821735382 |
| 1422553_at   | 0.240279684  | 9.693427803 | 2.18132889   | 0.055790269 | 0.055790269 | -3.822821509 |
| 1459734_at   | 0.234588531  | 6.248745175 | 2.180920312  | 0.05582801  | 0.05582801  | -3.823359666 |
| 1422600_at   | -0.227797061 | 3.882107783 | -2.180471758 | 0.055869473 | 0.055869473 | -3.823950455 |
| 1451350_a_at | 0.232923469  | 9.031126178 | 2.180325712  | 0.05588298  | 0.05588298  | -3.824142805 |
| 1444075_at   | 0.15170826   | 4.564387041 | 2.179538368  | 0.055955849 | 0.055955849 | -3.825179736 |
| 1448546_at   | -0.14682679  | 7.211168216 | -2.179497857 | 0.055959601 | 0.055959601 | -3.825233087 |
| 1450306_at   | -0.15510833  | 4.475146865 | -2.179471206 | 0.055962069 | 0.055962069 | -3.825268184 |
| 1421686_at   | -0.164016454 | 4.745867161 | -2.179265061 | 0.055981165 | 0.055981165 | -3.825539662 |
| 1456815_at   | -0.188856228 | 3.787219501 | -2.179072618 | 0.055998997 | 0.055998997 | -3.82579309  |
| 1430135_at   | 0.160601482  | 4.595412675 | 2.178637316  | 0.056039354 | 0.056039354 | -3.826366322 |
| 1444474_at   | -0.222742855 | 4.682683679 | -2.17860843  | 0.056042033 | 0.056042033 | -3.826404361 |
| 1430111_a_at | -0.253186605 | 6.295577974 | -2.178214151 | 0.056078613 | 0.056078613 | -3.826923549 |
| 1432774_at   | -0.184144509 | 3.865834715 | -2.177663837 | 0.056129708 | 0.056129708 | -3.827648173 |
| 1436166_at   | -0.227965624 | 7.969096642 | -2.177440292 | 0.056150476 | 0.056150476 | -3.827942513 |
| 1437799_at   | 0.170683351  | 6.264974778 | 2.176951442  | 0.056195918 | 0.056195918 | -3.828586158 |
| 1443912_at   | -0.168445686 | 3.404270015 | -2.176886001 | 0.056202004 | 0.056202004 | -3.828672319 |
| 1421838_at   | -0.254698019 | 4.375014921 | -2.176720575 | 0.056217391 | 0.056217391 | -3.828890119 |
| 1421234_at   | -0.150099575 | 4.132033032 | -2.176705192 | 0.056218822 | 0.056218822 | -3.828910372 |
| 1447540_at   | -0.170956083 | 6.610139058 | -2.176557861 | 0.05623253  | 0.05623253  | -3.829104344 |
| 1450059_at   | -0.241436357 | 6.775798977 | -2.175840305 | 0.056299338 | 0.056299338 | -3.830049024 |
| 1431368_at   | -0.179207789 | 3.865230177 | -2.175449782 | 0.05633573  | 0.05633573  | -3.83056313  |
| 1445587_at   | -0.144097505 | 3.757475027 | -2.175248008 | 0.056354542 | 0.056354542 | -3.830828748 |
| 1453982_at   | -0.160244247 | 4.492695831 | -2.175245161 | 0.056354807 | 0.056354807 | -3.830832495 |
| 1427440_a_at | -0.186386394 | 4.491735436 | -2.175157476 | 0.056362984 | 0.056362984 | -3.830947923 |
| 1446178_at   | -0.173350829 | 7.005621843 | -2.174937246 | 0.056383527 | 0.056383527 | -3.83123783  |
| 1451286_s_at | 0.142900283  | 11.13681892 | 2.17454546   | 0.056420089 | 0.056420089 | -3.831753552 |
| 1451335_at   | 0.305691253  | 6.782893271 | 2.173929848  | 0.056477586 | 0.056477586 | -3.832563864 |
| 1444112_at   | -0.229929008 | 5.414063722 | -2.173298518 | 0.05653661  | 0.05653661  | -3.833394816 |
| 1435342_at   | -0.291600981 | 8.70561827  | -2.173157566 | 0.056549796 | 0.056549796 | -3.833580329 |
| 1451942_x_at | -0.173694534 | 3.196202228 | -2.172996136 | 0.056564901 | 0.056564901 | -3.833792791 |
| 1445236_at   | -0.136374119 | 3.447275392 | -2.172859062 | 0.056577731 | 0.056577731 | -3.833973195 |
| 1438536_at   | -0.195472042 | 5.264540813 | -2.17277859  | 0.056585264 | 0.056585264 | -3.834079103 |
| 1438709_at   | -0.147153159 | 7.142585567 | -2.172676916 | 0.056594783 | 0.056594783 | -3.834212914 |
| 1445108_at   | -0.203023545 | 7.238506524 | -2.172659759 | 0.056596389 | 0.056596389 | -3.834235493 |
| 1440389_at   | 0.166862073  | 3.251161171 | 2.172611269  | 0.05660093  | 0.05660093  | -3.83429931  |
| 1416456_a_at | 0.170101893  | 4.528281242 | 2.172563432  | 0.056605409 | 0.056605409 | -3.834362266 |
| 1440304_at   | 0.199839148  | 7.344639483 | 2.171902785  | 0.056667311 | 0.056667311 | -3.835231687 |
| 1457180_at   | -0.221988352 | 5.712139592 | -2.171803971 | 0.056676575 | 0.056676575 | -3.835361723 |
| 1454726_s_at | 0.206224035  | 8.865588455 | 2.171352016  | 0.056718967 | 0.056718967 | -3.835956464 |
| 1446840_at   | 0.183836159  | 4.483337959 | 2.171265283  | 0.056727106 | 0.056727106 | -3.836070596 |
| 1453967_at   | -0.183877663 | 5.698422036 | -2.171132247 | 0.056739592 | 0.056739592 | -3.836245654 |
| 1425807_at   | -0.217517146 | 4.489111037 | -2.170800144 | 0.056770772 | 0.056770772 | -3.836682653 |
| 1421186_at   | 0.233787978  | 5.658565283 | 2.170753451  | 0.056775158 | 0.056775158 | -3.836744092 |
| 1458116_at   | 0.235918114  | 4.626111667 | 2.170666901  | 0.056783287 | 0.056783287 | -3.836857976 |
| 1418431_at   | 0.386263225  | 8.11846557  | 2.170527139  | 0.056796417 | 0.056796417 | -3.837041876 |
| 1459245_s_at | -0.165848078 | 4.035201136 | -2.170200212 | 0.056827141 | 0.056827141 | -3.837472038 |
| 1425105_at   | -0.259611204 | 5.009482641 | -2.170084074 | 0.056838059 | 0.056838059 | -3.837624845 |
| 1447093_at   | -0.426627466 | 6.856005258 | -2.16971566  | 0.056872708 | 0.056872708 | -3.838109572 |
| 1449632_s_at | -0.190140149 | 10.72676155 | -2.16950434  | 0.056892592 | 0.056892592 | -3.8383876   |

|              |              |             |              |             |             |              |
|--------------|--------------|-------------|--------------|-------------|-------------|--------------|
| 1433271_at   | -0.482093403 | 5.47323264  | -2.169391979 | 0.056903167 | 0.056903167 | -3.838535428 |
| 1434146_at   | 0.337346568  | 3.71324566  | 2.169304663  | 0.056911386 | 0.056911386 | -3.838650305 |
| 1442608_at   | -0.241552746 | 6.090759456 | -2.169014662 | 0.056938693 | 0.056938693 | -3.839031835 |
| 1424525_at   | -0.355994856 | 5.460303719 | -2.168872326 | 0.0569521   | 0.0569521   | -3.83921909  |
| 1422171_at   | -0.153695168 | 5.990480107 | -2.168647461 | 0.056973286 | 0.056973286 | -3.839514914 |
| 1427679_at   | 0.299879627  | 5.523318449 | 2.168625389  | 0.056975367 | 0.056975367 | -3.839543951 |
| 1441187_at   | -0.333447198 | 3.874049713 | -2.168300815 | 0.057005963 | 0.057005963 | -3.839970937 |
| 1429255_at   | -0.213208895 | 7.225355458 | -2.167991023 | 0.05703518  | 0.05703518  | -3.840378463 |
| 1417600_at   | 0.257639102  | 7.89807808  | 2.167673242  | 0.057065166 | 0.057065166 | -3.840796486 |
| 1456424_s_at | -0.175086759 | 9.84287643  | -2.167532421 | 0.057078459 | 0.057078459 | -3.840981724 |
| 1458609_at   | 0.181242771  | 3.492032532 | 2.167414672  | 0.057089576 | 0.057089576 | -3.84113661  |
| 1422003_at   | -0.202036454 | 3.890591364 | -2.167395538 | 0.057091383 | 0.057091383 | -3.841161778 |
| 1441595_at   | 0.171105665  | 3.392311193 | 2.167228555  | 0.057107152 | 0.057107152 | -3.841381424 |
| 1454637_at   | 0.174518853  | 7.158668111 | 2.166969747  | 0.057131602 | 0.057131602 | -3.841721846 |
| 1428659_at   | -0.182952219 | 6.718749043 | -2.166814978 | 0.057146228 | 0.057146228 | -3.841925417 |
| 1448845_at   | -0.158409201 | 3.536274069 | -2.166745394 | 0.057152805 | 0.057152805 | -3.842016941 |
| 1454191_at   | -0.177178597 | 3.658257902 | -2.166624334 | 0.057164249 | 0.057164249 | -3.84217617  |
| 1456397_at   | -0.28584718  | 7.250345948 | -2.165852327 | 0.057237282 | 0.057237282 | -3.84319154  |
| 1449313_at   | -0.18143657  | 3.628425657 | -2.165818385 | 0.057240495 | 0.057240495 | -3.84323618  |
| 1441493_at   | -0.242390307 | 4.705797021 | -2.165786475 | 0.057243516 | 0.057243516 | -3.843278147 |
| 1451442_at   | -0.220450757 | 9.612339588 | -2.16551746  | 0.057268989 | 0.057268989 | -3.843631945 |
| 1418365_at   | -0.368932187 | 7.908391238 | -2.165350118 | 0.05728484  | 0.05728484  | -3.843852021 |
| 1441466_at   | 0.41796739   | 7.524490938 | 2.165309854  | 0.057288654 | 0.057288654 | -3.843904973 |
| 1453920_a_at | 0.150681739  | 6.558979837 | 2.165135569  | 0.057305169 | 0.057305169 | -3.844134175 |
| 1448742_at   | -0.192001557 | 7.273235752 | -2.164792508 | 0.057337689 | 0.057337689 | -3.844585323 |
| 1451189_at   | 0.190304789  | 7.447830359 | 2.164766156  | 0.057340188 | 0.057340188 | -3.844619977 |
| 1440929_at   | 0.174470136  | 3.887000679 | 2.164695301  | 0.057346907 | 0.057346907 | -3.844713154 |
| 1451059_at   | -0.218095469 | 5.302689957 | -2.164338493 | 0.057380754 | 0.057380754 | -3.845182359 |
| 1456472_at   | -0.445404482 | 5.948110849 | -2.164206097 | 0.057393318 | 0.057393318 | -3.845356456 |
| 1418306_at   | -0.22486032  | 5.520768104 | -2.164149397 | 0.0573987   | 0.0573987   | -3.845431014 |
| 1429537_at   | 0.182351642  | 8.909234944 | 2.163739591  | 0.05743761  | 0.05743761  | -3.845969882 |
| 1433532_a_at | 0.460225418  | 5.567945886 | 2.163470369  | 0.057463187 | 0.057463187 | -3.846323878 |
| 1435113_x_at | 1.008793984  | 7.467592772 | 2.163147193  | 0.057493903 | 0.057493903 | -3.846748805 |
| 1441210_at   | 0.201370235  | 5.008301434 | 2.163000738  | 0.057507828 | 0.057507828 | -3.846941367 |
| 1423554_at   | -0.192064615 | 7.261379354 | -2.161187864 | 0.057680467 | 0.057680467 | -3.849324729 |
| 1425325_at   | -0.168205758 | 3.395485939 | -2.161170644 | 0.05768211  | 0.05768211  | -3.849347366 |
| 1446444_at   | 0.190381348  | 7.278991687 | 2.160848397  | 0.05771285  | 0.05771285  | -3.849770974 |
| 1427423_at   | -0.177983244 | 4.396843733 | -2.160844932 | 0.057713181 | 0.057713181 | -3.849775528 |
| 1444413_at   | -0.237070769 | 5.885829257 | -2.160558832 | 0.057740487 | 0.057740487 | -3.850151607 |
| 1424648_at   | 0.250431011  | 7.388626579 | 2.160541153  | 0.057742175 | 0.057742175 | -3.850174847 |
| 1424500_at   | 0.163062558  | 9.128721898 | 2.160470936  | 0.057748878 | 0.057748878 | -3.850267145 |
| 1423634_at   | -0.182590536 | 3.490847334 | -2.159929976 | 0.05780055  | 0.05780055  | -3.850978201 |
| 1443509_at   | 0.400304734  | 4.604627178 | 2.159653735  | 0.057826953 | 0.057826953 | -3.851341287 |
| 1453159_at   | -0.491410603 | 7.342234302 | -2.159610322 | 0.057831104 | 0.057831104 | -3.851398348 |
| 1440970_at   | 0.229752454  | 5.236745699 | 2.159239892  | 0.05786653  | 0.05786653  | -3.851885216 |
| 1442434_at   | 0.181487082  | 8.398924727 | 2.159238377  | 0.057866675 | 0.057866675 | -3.851887207 |
| 1453296_at   | 0.133952096  | 6.339327948 | 2.159220604  | 0.057868376 | 0.057868376 | -3.851910566 |
| 1429460_at   | 0.156624517  | 3.619916947 | 2.159138934  | 0.057876189 | 0.057876189 | -3.852017904 |
| 1451320_at   | 0.159486979  | 5.692685796 | 2.15838635   | 0.05794824  | 0.05794824  | -3.853006984 |
| 1429569_a_at | 0.204167039  | 4.590802657 | 2.158028931  | 0.057982489 | 0.057982489 | -3.853476692 |
| 1426296_at   | 0.212750733  | 7.273858921 | 2.157924879  | 0.057992463 | 0.057992463 | -3.85361343  |
| 1449337_at   | -0.163963821 | 4.157951455 | -2.157129429 | 0.058068768 | 0.058068768 | -3.854658713 |
| 1417732_at   | 0.364179266  | 8.154477804 | 2.156599268  | 0.058119679 | 0.058119679 | -3.855355338 |



|              |              |             |              |             |             |              |
|--------------|--------------|-------------|--------------|-------------|-------------|--------------|
| 1442553_at   | -0.207645585 | 4.446136024 | -2.156461596 | 0.058132906 | 0.058132906 | -3.855536232 |
| 1440923_at   | -0.186153125 | 5.423607698 | -2.156429652 | 0.058135976 | 0.058135976 | -3.855578204 |
| 1460204_at   | 0.173474895  | 6.337133685 | 2.156207403  | 0.058157337 | 0.058157337 | -3.85587022  |
| 1423110_at   | -0.238633418 | 13.04635729 | -2.155827827 | 0.058193836 | 0.058193836 | -3.856368935 |
| 1428283_at   | -0.23660242  | 6.642902348 | -2.155445639 | 0.058230609 | 0.058230609 | -3.856871063 |
| 1446063_at   | -0.168191874 | 5.570003868 | -2.1554053   | 0.058234492 | 0.058234492 | -3.856924059 |
| 1417684_at   | 0.205241684  | 8.577426193 | 2.155083419  | 0.058265481 | 0.058265481 | -3.857346936 |
| 1444613_at   | 0.207826767  | 5.075801751 | 2.154919827  | 0.058281238 | 0.058281238 | -3.857561853 |
| 1423323_at   | 0.221037673  | 6.879720054 | 2.154378386  | 0.058333416 | 0.058333416 | -3.858273139 |
| 1427178_at   | -0.166391253 | 6.862807332 | -2.153832187 | 0.058386098 | 0.058386098 | -3.858990634 |
| 1450774_at   | -0.214263961 | 3.972386114 | -2.153707751 | 0.058398106 | 0.058398106 | -3.85915409  |
| 1436990_s_at | -0.223785694 | 7.811990758 | -2.15342656  | 0.058425251 | 0.058425251 | -3.859523446 |
| 1430384_at   | 0.314461089  | 7.012344626 | 2.1533917    | 0.058428617 | 0.058428617 | -3.859569235 |
| 1460072_at   | -0.157351723 | 5.126181312 | -2.153098621 | 0.058456924 | 0.058456924 | -3.859954194 |
| 1454164_at   | -0.172621595 | 4.594418658 | -2.152836275 | 0.058482274 | 0.058482274 | -3.860298776 |
| 1449079_s_at | -0.17830065  | 7.360699596 | -2.152735064 | 0.058492057 | 0.058492057 | -3.86043171  |
| 1448015_at   | 0.136240844  | 5.098911254 | 2.152597349  | 0.05850537  | 0.05850537  | -3.860612586 |
| 1419215_at   | 0.196569777  | 4.374550477 | 2.152467046  | 0.05851797  | 0.05851797  | -3.860783727 |
| 1436653_at   | -0.1528105   | 5.568997011 | -2.151463531 | 0.058615092 | 0.058615092 | -3.862101667 |
| 1419321_at   | 0.209964784  | 4.36936202  | 2.151371771  | 0.05862398  | 0.05862398  | -3.862222171 |
| 1459423_at   | 0.155813718  | 5.144869658 | 2.151303095  | 0.058630634 | 0.058630634 | -3.862312359 |
| 1433716_x_at | -0.205188599 | 9.61973604  | -2.15128777  | 0.058632119 | 0.058632119 | -3.862332485 |
| 1436183_at   | 0.177640275  | 6.793466114 | 2.151115223  | 0.058648838 | 0.058648838 | -3.862559077 |
| 1447022_at   | -0.196697009 | 4.056034985 | -2.150919661 | 0.058667794 | 0.058667794 | -3.862815889 |
| 1424339_at   | -0.152236919 | 5.740620617 | -2.150893289 | 0.058670351 | 0.058670351 | -3.862850519 |
| 1431319_at   | -0.207690218 | 5.404101818 | -2.150652474 | 0.058693702 | 0.058693702 | -3.863166748 |
| 1458795_at   | -0.131437744 | 3.602289716 | -2.150625148 | 0.058696352 | 0.058696352 | -3.863202631 |
| 1424725_at   | -0.195212713 | 4.687414114 | -2.150587398 | 0.058700013 | 0.058700013 | -3.863252202 |
| 1460497_a_at | 0.152076078  | 3.297909162 | 2.150438704  | 0.058714438 | 0.058714438 | -3.863447456 |
| 1432766_at   | -0.224724454 | 5.589864165 | -2.150379589 | 0.058720173 | 0.058720173 | -3.86352508  |
| 1420854_at   | -0.257884987 | 8.309974163 | -2.15036095  | 0.058721982 | 0.058721982 | -3.863549556 |
| 1459430_at   | -0.203978666 | 4.528108566 | -2.150331599 | 0.05872483  | 0.05872483  | -3.863588097 |
| 1426981_at   | -0.239499068 | 8.790232029 | -2.149839601 | 0.058772589 | 0.058772589 | -3.864234123 |
| 1452504_s_at | -0.189547499 | 6.645166713 | -2.149324743 | 0.058822608 | 0.058822608 | -3.86491013  |
| 1434558_at   | 0.145956563  | 7.819823959 | 2.148432583  | 0.058909379 | 0.058909379 | -3.866081449 |
| 1441620_at   | -0.182553782 | 8.707634842 | -2.148358571 | 0.058916583 | 0.058916583 | -3.866178614 |
| 1459694_at   | 0.283591666  | 4.528440132 | 2.14808323   | 0.058943391 | 0.058943391 | -3.866540086 |
| 1426847_at   | -0.185317638 | 6.812739048 | -2.147933129 | 0.05895801  | 0.05895801  | -3.866737134 |
| 1450336_at   | 0.379248017  | 6.543043216 | 2.147723367  | 0.058978446 | 0.058978446 | -3.867012501 |
| 1439504_s_at | 0.166817878  | 6.368142987 | 2.147517667  | 0.058998492 | 0.058998492 | -3.86728253  |
| 1453432_at   | -0.382905014 | 4.348349225 | -2.146876845 | 0.059060986 | 0.059060986 | -3.868123718 |
| 1459137_at   | 0.195410542  | 4.103702176 | 2.146717661  | 0.059076519 | 0.059076519 | -3.868332665 |
| 1431093_at   | -0.209151235 | 4.122882286 | -2.146411857 | 0.059106372 | 0.059106372 | -3.868734058 |
| 1447207_at   | 0.164615922  | 5.408078326 | 2.146251846  | 0.059121998 | 0.059121998 | -3.86894408  |
| 1449010_at   | -0.366767933 | 7.104379609 | -2.146152439 | 0.059131707 | 0.059131707 | -3.869074555 |
| 1422424_at   | -0.166806242 | 3.620594857 | -2.145919376 | 0.059154478 | 0.059154478 | -3.869380452 |
| 1437528_x_at | 0.512270232  | 7.489798241 | 2.145880888  | 0.059158239 | 0.059158239 | -3.869430967 |
| 1428500_at   | -0.175172255 | 9.307475327 | -2.145794046 | 0.059166726 | 0.059166726 | -3.869544946 |
| 1425558_at   | 0.144580586  | 6.377696025 | 2.145539604  | 0.0591916   | 0.0591916   | -3.86987889  |
| 1460137_at   | 0.142354298  | 4.023014691 | 2.14509257   | 0.059235326 | 0.059235326 | -3.870465582 |
| 1448048_at   | -0.224955504 | 4.267601674 | -2.144773954 | 0.05926651  | 0.05926651  | -3.87088372  |
| 1432527_at   | -0.155973102 | 3.366249201 | -2.144617034 | 0.059281875 | 0.059281875 | -3.87108965  |
| 1440644_at   | 0.157223206  | 3.521103139 | 2.144571809  | 0.059286303 | 0.059286303 | -3.871148999 |

|              |              |             |              |             |             |              |
|--------------|--------------|-------------|--------------|-------------|-------------|--------------|
| 1419572_a_at | 0.152771449  | 6.606466737 | 2.144315043  | 0.059311453 | 0.059311453 | -3.87148595  |
| 1445529_at   | 0.139742315  | 3.404734459 | 2.143806347  | 0.05936131  | 0.05936131  | -3.872153478 |
| 1448613_at   | 0.391982068  | 6.124618767 | 2.143561749  | 0.059385298 | 0.059385298 | -3.872474436 |
| 1438075_at   | 0.14334611   | 6.466067327 | 2.143452884  | 0.059395977 | 0.059395977 | -3.872617283 |
| 1440880_at   | -0.178916202 | 8.403536254 | -2.142733994 | 0.059466544 | 0.059466544 | -3.87356054  |
| 1444607_at   | 0.166159907  | 5.22163213  | 2.142061036  | 0.059532675 | 0.059532675 | -3.874443462 |
| 1437072_at   | -0.196901782 | 5.639587459 | -2.142037535 | 0.059534986 | 0.059534986 | -3.874474294 |
| 1428599_at   | -0.363053462 | 5.201247244 | -2.14199118  | 0.059539544 | 0.059539544 | -3.874535109 |
| 1416661_at   | 0.232352033  | 8.18266103  | 2.141688752  | 0.05956929  | 0.05956929  | -3.874931873 |
| 1449403_at   | 0.131860177  | 7.401654296 | 2.141563281  | 0.059581635 | 0.059581635 | -3.875096477 |
| 1454363_at   | 0.159281563  | 3.430941684 | 2.141348932  | 0.05960273  | 0.05960273  | -3.875377676 |
| 1460482_at   | 0.627069007  | 5.605642901 | 2.14134769   | 0.059602853 | 0.059602853 | -3.875379305 |
| 1426246_at   | 0.163719747  | 8.481523853 | 2.141102666  | 0.059626976 | 0.059626976 | -3.875700737 |
| 1448470_at   | -0.222868283 | 5.18475009  | -2.140807261 | 0.059656072 | 0.059656072 | -3.876088249 |
| 1429628_at   | 0.314966136  | 4.336897743 | 2.140720263  | 0.059664644 | 0.059664644 | -3.876202371 |
| 1439088_at   | 0.245118326  | 5.70915212  | 2.140316388  | 0.059704451 | 0.059704451 | -3.87673215  |
| 1429552_at   | -0.829534113 | 7.369014011 | -2.140301482 | 0.059705921 | 0.059705921 | -3.876751701 |
| 1445408_at   | -0.190123975 | 5.068828181 | -2.140210762 | 0.059714866 | 0.059714866 | -3.8768707   |
| 1448591_at   | 0.262959031  | 8.92082502  | 2.139983546  | 0.059737277 | 0.059737277 | -3.877168734 |
| 1439366_at   | 0.240702042  | 4.939656793 | 2.139795652  | 0.059755815 | 0.059755815 | -3.877415186 |
| 1446512_at   | 0.577947834  | 6.293049631 | 2.139721582  | 0.059763124 | 0.059763124 | -3.877512338 |
| 1418469_at   | 0.181025525  | 7.984336103 | 2.139501214  | 0.059784876 | 0.059784876 | -3.877801375 |
| 1417880_at   | -0.215151932 | 4.117925093 | -2.139115117 | 0.059823005 | 0.059823005 | -3.878307768 |
| 1419356_at   | 0.320874497  | 7.071974729 | 2.139048464  | 0.059829589 | 0.059829589 | -3.878395186 |
| 1428638_at   | -0.366526283 | 5.681579227 | -2.137865138 | 0.059946606 | 0.059946606 | -3.879947058 |
| 1440898_at   | -0.200901729 | 6.69117296  | -2.137770913 | 0.059955934 | 0.059955934 | -3.880070621 |
| 1424156_at   | 0.153522398  | 8.506487823 | 2.137446659  | 0.059988042 | 0.059988042 | -3.880495824 |
| 1427846_x_at | -0.128749154 | 6.68508474  | -2.136780045 | 0.060054103 | 0.060054103 | -3.881369927 |
| 1458115_at   | -0.44090888  | 4.567507762 | -2.135235523 | 0.060207434 | 0.060207434 | -3.883394953 |
| 1425449_at   | 0.146874577  | 3.594079238 | 2.13485083   | 0.060245683 | 0.060245683 | -3.883899272 |
| 1430231_a_at | 0.333271202  | 5.802966457 | 2.134632234  | 0.060267428 | 0.060267428 | -3.884185834 |
| 1436366_at   | -0.174499331 | 5.816778953 | -2.134090469 | 0.060321352 | 0.060321352 | -3.884896016 |
| 1418932_at   | 0.236253434  | 7.199923225 | 2.134009011  | 0.060329464 | 0.060329464 | -3.885002793 |
| 1454332_at   | 0.17160161   | 3.328716364 | 2.133969047  | 0.060333444 | 0.060333444 | -3.885055178 |
| 1435351_at   | 0.228551397  | 9.257327515 | 2.133825575  | 0.060347735 | 0.060347735 | -3.885243241 |
| 1421795_s_at | 0.195805029  | 4.199628152 | 2.133818052  | 0.060348485 | 0.060348485 | -3.885253103 |
| 1416376_at   | -0.169093548 | 8.063666269 | -2.133344512 | 0.060395677 | 0.060395677 | -3.885873797 |
| 1416828_at   | 0.814975941  | 5.37588173  | 2.133135257  | 0.060416542 | 0.060416542 | -3.88614807  |
| 1419214_at   | -0.195490229 | 5.318115631 | -2.132894034 | 0.060440604 | 0.060440604 | -3.886464234 |
| 1422224_at   | -0.136648634 | 3.653630942 | -2.132879427 | 0.060442061 | 0.060442061 | -3.886483379 |
| 1427307_a_at | 0.169848227  | 5.747100431 | 2.132711842  | 0.060458783 | 0.060458783 | -3.886703024 |
| 1423351_at   | 0.131936578  | 7.510886875 | 2.132329237  | 0.060496977 | 0.060496977 | -3.887204467 |
| 1422854_at   | -0.223740282 | 8.426718563 | -2.13192826  | 0.060537031 | 0.060537031 | -3.887729967 |
| 1437613_s_at | 0.195952832  | 7.767446741 | 2.131828994  | 0.06054695  | 0.06054695  | -3.887860056 |
| 1438942_x_at | 0.209842527  | 3.7183718   | 2.131656888  | 0.060564152 | 0.060564152 | -3.888085599 |
| 1446933_at   | -0.192002576 | 4.412997556 | -2.131618752 | 0.060567964 | 0.060567964 | -3.888135575 |
| 1450276_a_at | -0.288308593 | 5.39096589  | -2.131572373 | 0.060572601 | 0.060572601 | -3.888196353 |
| 1426155_a_at | 0.373875995  | 8.840857661 | 2.131342476  | 0.06059559  | 0.06059559  | -3.888497623 |
| 1428450_at   | 0.130914612  | 7.719369094 | 2.131221202  | 0.06060772  | 0.06060772  | -3.888656543 |
| 1437409_s_at | -0.29176906  | 8.247828907 | -2.131150698 | 0.060614773 | 0.060614773 | -3.888748932 |
| 1420171_s_at | 0.162730187  | 10.88584216 | 2.131101373  | 0.060619708 | 0.060619708 | -3.888813567 |
| 1455876_at   | 0.286104999  | 7.375477905 | 2.131030476  | 0.060626802 | 0.060626802 | -3.888906471 |
| 1417066_at   | 0.163840113  | 6.009422149 | 2.130766054  | 0.060653266 | 0.060653266 | -3.889252962 |

|              |              |             |              |             |             |              |
|--------------|--------------|-------------|--------------|-------------|-------------|--------------|
| 1442875_at   | 0.162282385  | 3.718039432 | 2.13051507   | 0.060678396 | 0.060678396 | -3.889581835 |
| 1448761_a_at | 0.215169849  | 8.221716172 | 2.130119871  | 0.060717986 | 0.060717986 | -3.890099658 |
| 1430511_at   | -0.199073256 | 4.210980062 | -2.130099485 | 0.060720029 | 0.060720029 | -3.890126368 |
| 1427321_s_at | 0.211989616  | 7.101473755 | 2.129799427  | 0.060750105 | 0.060750105 | -3.890519515 |
| 1446071_at   | 0.194093435  | 4.80157495  | 2.129793012  | 0.060750748 | 0.060750748 | -3.89052792  |
| 1437059_at   | 0.164359466  | 8.69899335  | 2.129663579  | 0.060763727 | 0.060763727 | -3.890697504 |
| 1443271_at   | 0.192042864  | 3.160365235 | 2.129631554  | 0.060766938 | 0.060766938 | -3.890739462 |
| 1452454_at   | 0.309200077  | 7.95500385  | 2.129487521  | 0.060781384 | 0.060781384 | -3.890928171 |
| 1427291_at   | 0.132737115  | 3.204223384 | 2.128934632  | 0.060836869 | 0.060836869 | -3.891652525 |
| 1417635_at   | -0.523616503 | 6.433642545 | -2.128924437 | 0.060837892 | 0.060837892 | -3.891665882 |
| 1454314_at   | 0.695887477  | 5.567705715 | 2.128866947  | 0.060843664 | 0.060843664 | -3.891741199 |
| 1457781_at   | -0.154489645 | 9.622492387 | -2.128596626 | 0.060870813 | 0.060870813 | -3.892095334 |
| 1428669_at   | 0.142489099  | 8.133929056 | 2.128211232  | 0.060909538 | 0.060909538 | -3.892600204 |
| 1423679_at   | 0.157307618  | 8.278266475 | 2.128176752  | 0.060913003 | 0.060913003 | -3.892645372 |
| 1433670_at   | 0.189960929  | 8.842146877 | 2.128051693  | 0.060925575 | 0.060925575 | -3.892809196 |
| 1452845_at   | 0.192048369  | 5.098408914 | 2.127483517  | 0.060982725 | 0.060982725 | -3.893553459 |
| 1434128_a_at | 0.16224846   | 8.973938477 | 2.126871904  | 0.061044301 | 0.061044301 | -3.89435457  |
| 1418300_a_at | 0.141581775  | 10.39743004 | 2.126555244  | 0.061076205 | 0.061076205 | -3.89476932  |
| 1417958_at   | -0.150367952 | 4.40787443  | -2.126553706 | 0.06107636  | 0.06107636  | -3.894771335 |
| 1421173_at   | -0.137797795 | 4.07056832  | -2.126027282 | 0.061129434 | 0.061129434 | -3.895460793 |
| 1455582_at   | -0.283517471 | 7.392064516 | -2.125643091 | 0.061168196 | 0.061168196 | -3.895963943 |
| 1444701_at   | 0.294133014  | 5.719789591 | 2.125344456  | 0.061198342 | 0.061198342 | -3.896355031 |
| 1445083_at   | -0.165458582 | 3.788515479 | -2.125324208 | 0.061200387 | 0.061200387 | -3.896381547 |
| 1419006_s_at | 0.203872905  | 5.46727386  | 2.124912961  | 0.061241926 | 0.061241926 | -3.896920088 |
| 1426565_at   | 0.18252226   | 8.2908369   | 2.124898135  | 0.061243424 | 0.061243424 | -3.896939503 |
| 1458523_at   | 0.300516463  | 6.267475129 | 2.12483197   | 0.06125011  | 0.06125011  | -3.897026146 |
| 1427708_a_at | -0.21863153  | 5.573555343 | -2.124534739 | 0.061280153 | 0.061280153 | -3.89741536  |
| 1446993_at   | -0.150989685 | 4.477098617 | -2.124457185 | 0.061287995 | 0.061287995 | -3.897516912 |
| 1436987_at   | 0.176624573  | 3.962205077 | 2.12415271   | 0.061318789 | 0.061318789 | -3.897915597 |
| 1450089_a_at | -0.258161663 | 8.360871049 | -2.123744532 | 0.061360095 | 0.061360095 | -3.898450047 |
| 1450695_at   | 0.172843099  | 6.151147708 | 2.123679745  | 0.061366653 | 0.061366653 | -3.898534875 |
| 1416108_a_at | -0.154644541 | 10.14164741 | -2.12363063  | 0.061371626 | 0.061371626 | -3.898599182 |
| 1431056_a_at | -0.247482786 | 6.605867932 | -2.123412074 | 0.061393758 | 0.061393758 | -3.898885338 |
| 1442802_x_at | -0.190340855 | 3.754851122 | -2.122926621 | 0.061442944 | 0.061442944 | -3.899520914 |
| 1452900_at   | 0.165996023  | 4.89654255  | 2.122801692  | 0.061455608 | 0.061455608 | -3.899684472 |
| 1443484_at   | -0.145806984 | 4.247486826 | -2.121792905 | 0.061557961 | 0.061557961 | -3.901005093 |
| 1427673_a_at | -0.212597392 | 7.484323897 | -2.121657276 | 0.061571735 | 0.061571735 | -3.901182635 |
| 1417985_at   | 0.172816728  | 8.253713971 | 2.121397374  | 0.061598137 | 0.061598137 | -3.901522849 |
| 1449985_at   | -0.15215539  | 3.348999077 | -2.121326981 | 0.06160529  | 0.06160529  | -3.901614992 |
| 1419300_at   | -0.192382488 | 7.244002752 | -2.121201127 | 0.06161808  | 0.06161808  | -3.90177973  |
| 1416643_at   | -0.17426222  | 3.762947346 | -2.121138634 | 0.061624432 | 0.061624432 | -3.90186153  |
| 1460411_s_at | -0.287569216 | 9.81594938  | -2.121030453 | 0.06163543  | 0.06163543  | -3.902003133 |
| 1443202_at   | -0.149989912 | 4.61792285  | -2.120399889 | 0.061699568 | 0.061699568 | -3.902828468 |
| 1458608_at   | 0.162996585  | 5.883278922 | 2.120074763  | 0.061732664 | 0.061732664 | -3.903253997 |
| 1449440_at   | -0.215179045 | 4.375516073 | -2.119709342 | 0.061769882 | 0.061769882 | -3.903732246 |
| 1420464_s_at | 0.171659013  | 3.556998361 | 2.119574367  | 0.061783635 | 0.061783635 | -3.903908891 |
| 1443036_at   | 0.529467033  | 5.201958307 | 2.119266014  | 0.061815064 | 0.061815064 | -3.904312431 |
| 1422061_at   | 0.188792917  | 3.573535948 | 2.119168661  | 0.06182499  | 0.06182499  | -3.904439833 |
| 1425002_at   | -0.173344922 | 3.618569579 | -2.119102246 | 0.061831762 | 0.061831762 | -3.904526746 |
| 1435487_at   | -0.230795561 | 5.321715135 | -2.119007199 | 0.061841456 | 0.061841456 | -3.904651129 |
| 1433387_at   | 0.186848839  | 3.238922614 | 2.118537583  | 0.061889371 | 0.061889371 | -3.905265666 |
| 1436702_at   | 0.160108971  | 4.182671018 | 2.118393757  | 0.061904053 | 0.061904053 | -3.905453871 |
| 1431650_at   | 0.142773019  | 4.621941712 | 2.118134376  | 0.061930539 | 0.061930539 | -3.905793275 |

|              |              |             |              |             |             |              |
|--------------|--------------|-------------|--------------|-------------|-------------|--------------|
| 1434647_at   | -0.175566416 | 7.359977643 | -2.118009874 | 0.061943256 | 0.061943256 | -3.905956185 |
| 1433471_at   | -0.248734105 | 8.345015121 | -2.118000125 | 0.061944252 | 0.061944252 | -3.905968943 |
| 1427974_s_at | 0.229686328  | 6.379993491 | 2.117866538  | 0.0619579   | 0.0619579   | -3.906143736 |
| 1433391_at   | -0.164249315 | 3.866560311 | -2.117639476 | 0.061981105 | 0.061981105 | -3.906440835 |
| 1422261_a_at | 0.186362419  | 6.363256882 | 2.117599556  | 0.061985185 | 0.061985185 | -3.906493067 |
| 1436856_x_at | 0.139467395  | 6.661548465 | 2.117530664  | 0.061992228 | 0.061992228 | -3.906583207 |
| 1455857_a_at | 0.17021418   | 6.485480581 | 2.117429342  | 0.062002587 | 0.062002587 | -3.906715777 |
| 1433145_at   | 0.160588704  | 4.228755737 | 2.116779221  | 0.062069095 | 0.062069095 | -3.907566361 |
| 1426032_at   | -0.163500213 | 6.002011458 | -2.116701518 | 0.062077048 | 0.062077048 | -3.907668019 |
| 1422383_at   | -0.271140476 | 4.672408558 | -2.116370516 | 0.062110941 | 0.062110941 | -3.908101057 |
| 1454787_at   | -0.163058067 | 7.737349953 | -2.116264022 | 0.062121849 | 0.062121849 | -3.908240376 |
| 1449938_at   | 0.218283322  | 5.310405028 | 2.11613769   | 0.062134791 | 0.062134791 | -3.908405645 |
| 1436319_at   | 0.260900218  | 9.926064751 | 2.115933261  | 0.06215574  | 0.06215574  | -3.908673077 |
| 1460619_at   | 0.200498646  | 5.665836976 | 2.115755647  | 0.062173946 | 0.062173946 | -3.908905424 |
| 1439832_at   | 0.322706287  | 5.70022228  | 2.115681411  | 0.062181558 | 0.062181558 | -3.909002536 |
| 1433719_at   | 0.167310282  | 6.052459964 | 2.115170892  | 0.062233923 | 0.062233923 | -3.909670344 |
| 1459640_at   | -0.372456861 | 5.072158891 | -2.115151028 | 0.062235962 | 0.062235962 | -3.909696327 |
| 1428962_at   | -0.223231045 | 5.845565656 | -2.115001604 | 0.062251297 | 0.062251297 | -3.909891781 |
| 1417502_at   | -0.154181682 | 7.745116748 | -2.114911247 | 0.062260572 | 0.062260572 | -3.91000997  |
| 1449326_x_at | 0.166117864  | 3.987169242 | 2.114509609  | 0.062301816 | 0.062301816 | -3.910535308 |
| 1449896_at   | -0.161434077 | 4.447619236 | -2.114411582 | 0.062311887 | 0.062311887 | -3.910663522 |
| 1424668_a_at | -0.184931    | 4.967046793 | -2.114156031 | 0.062338147 | 0.062338147 | -3.910997765 |
| 1434784_s_at | -0.161705275 | 7.560686897 | -2.113821643 | 0.062372525 | 0.062372525 | -3.911435105 |
| 1425428_at   | 0.19022698   | 9.40627288  | 2.11366146   | 0.062388999 | 0.062388999 | -3.911644599 |
| 1457724_at   | -0.160391049 | 3.822612917 | -2.113434042 | 0.062412396 | 0.062412396 | -3.91194202  |
| 1454593_at   | -0.140876929 | 3.778421535 | -2.113114729 | 0.062445261 | 0.062445261 | -3.912359609 |
| 1450347_at   | -0.181741847 | 3.975853217 | -2.112955856 | 0.062461619 | 0.062461619 | -3.912567373 |
| 1429769_at   | 0.147584592  | 7.266129177 | 2.112754159  | 0.062482392 | 0.062482392 | -3.912831135 |
| 1447166_at   | -0.212515743 | 3.514252534 | -2.112550813 | 0.062503342 | 0.062503342 | -3.913097047 |
| 1459470_at   | 0.136956637  | 6.877352955 | 2.112492104  | 0.062509392 | 0.062509392 | -3.913173818 |
| 1426005_at   | -0.580112461 | 6.628310404 | -2.112474398 | 0.062511217 | 0.062511217 | -3.91319697  |
| 1436448_a_at | 0.177851334  | 6.296054165 | 2.112408312  | 0.062518027 | 0.062518027 | -3.913283388 |
| 1421299_a_at | 0.459546916  | 4.585048308 | 2.112369438  | 0.062522034 | 0.062522034 | -3.913334221 |
| 1439794_at   | 0.208054403  | 6.211081367 | 2.112250419  | 0.062534303 | 0.062534303 | -3.913489854 |
| 1434613_at   | 0.163634022  | 9.559605495 | 2.111924368  | 0.062567925 | 0.062567925 | -3.913916196 |
| 1448120_at   | -0.208279297 | 6.05738272  | -2.111875592 | 0.062572956 | 0.062572956 | -3.913979974 |
| 1422622_at   | 0.187865517  | 6.660198969 | 2.111762867  | 0.062584585 | 0.062584585 | -3.914127369 |
| 1452804_at   | -0.723587729 | 6.57281241  | -2.111556527 | 0.062605876 | 0.062605876 | -3.914397165 |
| 1418402_at   | -0.17195539  | 8.297356341 | -2.11155524  | 0.062606009 | 0.062606009 | -3.914398847 |
| 1452992_at   | 0.5013241    | 7.204357171 | 2.11127496   | 0.062634942 | 0.062634942 | -3.914765311 |
| 1436949_a_at | 0.140375794  | 11.21269418 | 2.110901472  | 0.062673516 | 0.062673516 | -3.915253626 |
| 1439870_at   | -0.157285092 | 3.422112224 | -2.110241329 | 0.062741753 | 0.062741753 | -3.916116674 |
| 1457537_at   | -0.135445574 | 5.843560703 | -2.110215291 | 0.062744446 | 0.062744446 | -3.916150715 |
| 1452690_at   | -0.259908378 | 6.29928887  | -2.11002289  | 0.062764347 | 0.062764347 | -3.916402239 |
| 1455728_at   | 0.147606367  | 8.000001137 | 2.109995125  | 0.06276722  | 0.06276722  | -3.916438536 |
| 1428914_at   | -0.154178197 | 10.84900482 | -2.109865426 | 0.06278064  | 0.06278064  | -3.916608087 |
| 1443203_at   | -0.178133605 | 6.525329375 | -2.109789489 | 0.062788499 | 0.062788499 | -3.916707356 |
| 1438020_at   | -0.465962364 | 6.669263835 | -2.109724844 | 0.062795189 | 0.062795189 | -3.916791863 |
| 1451210_at   | 0.176194657  | 8.314250679 | 2.109475905  | 0.062820961 | 0.062820961 | -3.91711728  |
| 1452910_at   | -0.207746397 | 6.184071331 | -2.109424344 | 0.0628263   | 0.0628263   | -3.917184681 |
| 1445245_at   | -0.138633338 | 4.391608006 | -2.109148927 | 0.062854827 | 0.062854827 | -3.917544698 |
| 1438313_at   | -0.153707938 | 3.908564673 | -2.108251907 | 0.062947823 | 0.062947823 | -3.918717175 |
| 1435991_at   | 0.145141183  | 5.388688602 | 2.108199541  | 0.062953256 | 0.062953256 | -3.918785619 |

|                 |              |             |              |             |             |              |
|-----------------|--------------|-------------|--------------|-------------|-------------|--------------|
| 1419163_s_at    | -0.168949087 | 8.693868618 | -2.108181823 | 0.062955095 | 0.062955095 | -3.918808777 |
| 1427745_x_at    | -0.196042038 | 4.283652458 | -2.108031159 | 0.062970729 | 0.062970729 | -3.919005692 |
| 1421240_at      | -0.158397457 | 5.733047251 | -2.108016233 | 0.062972278 | 0.062972278 | -3.9190252   |
| 1445187_at      | -0.128605359 | 3.238331661 | -2.10777842  | 0.062996964 | 0.062996964 | -3.919336012 |
| 1427638_at      | -0.155800332 | 5.207727047 | -2.106543576 | 0.063125297 | 0.063125297 | -3.920949764 |
| 1447601_x_at    | -0.202024174 | 5.912751453 | -2.106491814 | 0.063130681 | 0.063130681 | -3.921017404 |
| 1452322_a_at    | -0.177644682 | 6.940237531 | -2.105855359 | 0.063196929 | 0.063196929 | -3.921849057 |
| 1421905_at      | 0.266509883  | 7.628487412 | 2.105789264  | 0.063203813 | 0.063203813 | -3.921935419 |
| 1452216_at      | 0.138598065  | 7.945819662 | 2.105543682  | 0.063229395 | 0.063229395 | -3.9222563   |
| 1460191_at      | 0.205347315  | 8.728283669 | 2.105149947  | 0.063270432 | 0.063270432 | -3.922770742 |
| 1451177_at      | -0.164297716 | 9.312640883 | -2.105117055 | 0.063273862 | 0.063273862 | -3.922813717 |
| 1424009_at      | -0.176229418 | 4.908287584 | -2.105076646 | 0.063278075 | 0.063278075 | -3.922866513 |
| 1453034_at      | 0.144821186  | 8.147994481 | 2.10503852   | 0.06328205  | 0.06328205  | -3.922916325 |
| 1456337_at      | 0.31642512   | 3.753065397 | 2.104079128  | 0.063382168 | 0.063382168 | -3.92416972  |
| 1436978_at      | 0.144123883  | 7.308130016 | 2.103973403  | 0.06339321  | 0.06339321  | -3.924307835 |
| 1421008_at      | -0.181123345 | 3.969079083 | -2.103953945 | 0.063395242 | 0.063395242 | -3.924333255 |
| 1436164_at      | 0.139439276  | 8.245842948 | 2.103888649  | 0.063402063 | 0.063402063 | -3.924418554 |
| 1445168_at      | -0.164151392 | 3.731767932 | -2.10374452  | 0.063417121 | 0.063417121 | -3.924606835 |
| 1424221_at      | 0.157444462  | 7.332249904 | 2.103390801  | 0.063454092 | 0.063454092 | -3.925068896 |
| 1447727_at      | 0.151454955  | 3.343583291 | 2.103388221  | 0.063454361 | 0.063454361 | -3.925072266 |
| 1441912_x_at    | -0.167707708 | 6.170830464 | -2.103312861 | 0.063462241 | 0.063462241 | -3.925170706 |
| 1430491_at      | -0.161635864 | 5.689233448 | -2.102928815 | 0.063502409 | 0.063502409 | -3.925672357 |
| 1446212_at      | 0.259595349  | 6.065985118 | 2.102697438  | 0.063526621 | 0.063526621 | -3.925974576 |
| AFFX-BioDn-5_at | 0.151186257  | 10.29232508 | 2.102649453  | 0.063531644 | 0.063531644 | -3.926037253 |
| 1443716_at      | -0.144532773 | 5.006747785 | -2.102535413 | 0.063543581 | 0.063543581 | -3.926186205 |
| 1431331_at      | 0.144413231  | 5.222951714 | 2.102046662  | 0.063594768 | 0.063594768 | -3.926824561 |
| 1436194_at      | 0.172427669  | 6.950454919 | 2.102046655  | 0.063594769 | 0.063594769 | -3.92682457  |
| 1424467_at      | -0.146055124 | 8.135119233 | -2.101849227 | 0.063615457 | 0.063615457 | -3.92708242  |
| 1452244_at      | -0.281018134 | 4.802149257 | -2.101500221 | 0.063652044 | 0.063652044 | -3.927538222 |
| 1422370_at      | 0.193147342  | 4.205762832 | 2.100889482  | 0.063716118 | 0.063716118 | -3.928335804 |
| 1446031_at      | 0.146316396  | 6.643007903 | 2.100610005  | 0.063745459 | 0.063745459 | -3.928700761 |
| 1457429_s_at    | 0.239582525  | 7.528284684 | 2.100340614  | 0.063773753 | 0.063773753 | -3.929052536 |
| 1431074_a_at    | -0.250003015 | 6.780558244 | -2.100138867 | 0.063794951 | 0.063794951 | -3.929315974 |
| 1424687_at      | 0.347566265  | 7.696360951 | 2.100122954  | 0.063796623 | 0.063796623 | -3.929336752 |
| 1456787_at      | -0.14005654  | 7.516154079 | -2.100008126 | 0.063808692 | 0.063808692 | -3.929486689 |
| 1422499_at      | -0.16689421  | 8.696068241 | -2.099897606 | 0.063820309 | 0.063820309 | -3.929630999 |
| 1419771_at      | -0.134685755 | 3.434069604 | -2.099378037 | 0.063874953 | 0.063874953 | -3.930309393 |
| 1458218_s_at    | 0.133287974  | 9.009984124 | 2.099362843  | 0.063876551 | 0.063876551 | -3.930329231 |
| 1446733_at      | -0.166573974 | 4.619108683 | -2.099282554 | 0.063885    | 0.063885    | -3.930434059 |
| 1421883_at      | 0.923775419  | 6.861898559 | 2.099100043  | 0.063904208 | 0.063904208 | -3.930672349 |
| 1458882_at      | -0.188738443 | 4.294471395 | -2.098957611 | 0.063919202 | 0.063919202 | -3.930858306 |
| 1431482_at      | 0.160395211  | 4.723474443 | 2.098933151  | 0.063921777 | 0.063921777 | -3.93089024  |
| 1449859_at      | -1.298329247 | 6.541234565 | -2.098813891 | 0.063934335 | 0.063934335 | -3.931045942 |
| 1460106_at      | -0.15664352  | 5.208284705 | -2.098594246 | 0.06395747  | 0.06395747  | -3.931332699 |
| 1422305_at      | -0.146323185 | 4.128609396 | -2.098571963 | 0.063959817 | 0.063959817 | -3.93136179  |
| 1442574_at      | 0.223694772  | 4.441253463 | 2.098483511  | 0.063969136 | 0.063969136 | -3.931477264 |
| 1459547_at      | -0.205750532 | 3.929058773 | -2.098426556 | 0.063975137 | 0.063975137 | -3.931551619 |
| 1431908_at      | 0.146436153  | 3.8138183   | 2.098115385  | 0.064007934 | 0.064007934 | -3.931957844 |
| 1416646_at      | -0.705273675 | 4.49817023  | -2.097766763 | 0.064044697 | 0.064044697 | -3.932412942 |
| 1437631_at      | -0.207459967 | 3.82304701  | -2.097563049 | 0.064066189 | 0.064066189 | -3.932678866 |
| 1437206_at      | 0.261700386  | 9.036138555 | 2.097242679  | 0.064100002 | 0.064100002 | -3.933097058 |
| 1435409_at      | 0.298810814  | 10.25997189 | 2.097130776  | 0.064111816 | 0.064111816 | -3.933243124 |
| 1434723_at      | 0.144531102  | 7.686044394 | 2.096601006  | 0.064167777 | 0.064167777 | -3.933934609 |

|              |              |             |              |             |             |              |
|--------------|--------------|-------------|--------------|-------------|-------------|--------------|
| 1423940_at   | -0.166769521 | 9.344509404 | -2.09652779  | 0.064175515 | 0.064175515 | -3.93403017  |
| 1459752_at   | -0.156580876 | 3.556515246 | -2.096337294 | 0.064195651 | 0.064195651 | -3.934278804 |
| 1450921_at   | 0.142199385  | 7.189973826 | 2.096153525  | 0.064215082 | 0.064215082 | -3.934518651 |
| 1450026_a_at | 0.148984707  | 7.442811983 | 2.096022662  | 0.064228923 | 0.064228923 | -3.934689444 |
| 1441653_at   | 0.317198667  | 6.927832511 | 2.095878766  | 0.064244145 | 0.064244145 | -3.934877243 |
| 1447203_at   | -0.140100536 | 4.082256232 | -2.095244346 | 0.064311298 | 0.064311298 | -3.935705193 |
| 1418609_at   | -0.157507486 | 4.471684849 | -2.095194131 | 0.064316617 | 0.064316617 | -3.935770722 |
| 1439888_at   | 0.162376928  | 5.138294286 | 2.094915099  | 0.064346176 | 0.064346176 | -3.93613485  |
| 1441377_at   | -0.169271837 | 5.286982788 | -2.09440175  | 0.064400592 | 0.064400592 | -3.936804722 |
| 1437390_x_at | 0.218134445  | 8.514284305 | 2.094187305  | 0.064423336 | 0.064423336 | -3.937084541 |
| 1438919_x_at | -0.234052401 | 4.915728467 | -2.093359917 | 0.064511164 | 0.064511164 | -3.938164088 |
| 1421322_a_at | 0.140880005  | 7.033548962 | 2.093247144  | 0.064523143 | 0.064523143 | -3.938311223 |
| 1423722_at   | 0.176812591  | 9.401294918 | 2.092427987  | 0.064610226 | 0.064610226 | -3.93937991  |
| 1446152_at   | -0.213726799 | 6.269276818 | -2.092262018 | 0.064627883 | 0.064627883 | -3.939596424 |
| 1417426_at   | 0.414583341  | 7.370018294 | 2.09218834   | 0.064635723 | 0.064635723 | -3.939692539 |
| 1450517_at   | -0.211400978 | 4.996336652 | -2.092122143 | 0.064642768 | 0.064642768 | -3.939778893 |
| 1449078_at   | -0.201325806 | 6.949628882 | -2.091894401 | 0.06466701  | 0.06466701  | -3.940075979 |
| 1421395_at   | 0.143270508  | 6.361930766 | 2.091869865  | 0.064669622 | 0.064669622 | -3.940107986 |
| 1430369_at   | 0.188669025  | 6.270126547 | 2.091691365  | 0.06468863  | 0.06468863  | -3.940340831 |
| 1444217_at   | 0.152219741  | 6.439280144 | 2.091588466  | 0.06469959  | 0.06469959  | -3.940475054 |
| 1445316_at   | -0.208914187 | 6.313754574 | -2.091448962 | 0.064714451 | 0.064714451 | -3.940657025 |
| 1432217_a_at | -0.987537741 | 5.786188365 | -2.091310108 | 0.064729246 | 0.064729246 | -3.940838144 |
| 1417811_at   | 0.138460417  | 6.536556478 | 2.090850032  | 0.064778291 | 0.064778291 | -3.94143824  |
| 1436200_at   | 0.263127172  | 6.014879957 | 2.090813063  | 0.064782234 | 0.064782234 | -3.941486459 |
| 1427431_at   | -0.168191199 | 3.722524133 | -2.090742695 | 0.064789739 | 0.064789739 | -3.941578239 |
| 1460231_at   | -0.214692105 | 5.629248546 | -2.090655793 | 0.064799008 | 0.064799008 | -3.941691584 |
| 1424096_at   | 0.312450823  | 9.61687599  | 2.09062335   | 0.064802469 | 0.064802469 | -3.941733898 |
| 1423413_at   | 0.302610776  | 7.119176522 | 2.090281971  | 0.064838897 | 0.064838897 | -3.942179138 |
| 1425500_x_at | -0.156258514 | 3.434349311 | -2.090131075 | 0.064855005 | 0.064855005 | -3.942375936 |
| 1422109_at   | -0.159895542 | 5.594067548 | -2.090107453 | 0.064857527 | 0.064857527 | -3.942406744 |
| 1425028_a_at | 0.177730326  | 10.07144458 | 2.089926344  | 0.064876866 | 0.064876866 | -3.942642941 |
| 1453140_at   | 0.130962272  | 9.969495667 | 2.089868071  | 0.06488309  | 0.06488309  | -3.942718938 |
| 1432226_at   | -0.143485166 | 4.015549111 | -2.089415047 | 0.064931493 | 0.064931493 | -3.943309731 |
| 1416745_x_at | -0.15665073  | 5.934442512 | -2.089298533 | 0.064943948 | 0.064943948 | -3.943461673 |
| 1439160_at   | 0.158206279  | 7.331600421 | 2.08927476   | 0.064946489 | 0.064946489 | -3.943492674 |
| 1438728_at   | 0.156372136  | 7.624927149 | 2.089021908  | 0.064973526 | 0.064973526 | -3.943822402 |
| 1447554_at   | 0.148313441  | 3.177311449 | 2.088629654  | 0.065015491 | 0.065015491 | -3.944333893 |
| 1453189_at   | 0.289661962  | 8.498080963 | 2.088559877  | 0.065022959 | 0.065022959 | -3.944424879 |
| 1443371_at   | -0.184773536 | 3.576476915 | -2.088555609 | 0.065023415 | 0.065023415 | -3.944430443 |
| 1420836_at   | 0.179106989  | 7.82000169  | 2.088492653  | 0.065030154 | 0.065030154 | -3.944512535 |
| 1456858_at   | 0.184554326  | 3.556713835 | 2.087813324  | 0.065102907 | 0.065102907 | -3.945398293 |
| 1451740_at   | 0.207874286  | 8.758553123 | 2.087732398  | 0.06511158  | 0.06511158  | -3.945503806 |
| 1419387_s_at | -0.199401546 | 6.025824049 | -2.087639759 | 0.065121508 | 0.065121508 | -3.945624588 |
| 1431693_a_at | -0.416359698 | 6.665937426 | -2.087404068 | 0.065146775 | 0.065146775 | -3.945931875 |
| 1416479_a_at | 0.319088994  | 9.147576743 | 2.087264018  | 0.065161793 | 0.065161793 | -3.946114465 |
| 1453332_at   | -0.330882403 | 5.103375441 | -2.086692742 | 0.065223088 | 0.065223088 | -3.946859229 |
| 1431849_at   | -0.189552741 | 5.28002008  | -2.086430814 | 0.06525121  | 0.06525121  | -3.947200682 |
| 1454302_at   | 0.157578501  | 3.601866474 | 2.086019556  | 0.065295389 | 0.065295389 | -3.947736783 |
| 1440310_at   | -0.351251468 | 6.535285461 | -2.085856511 | 0.065312911 | 0.065312911 | -3.947949315 |
| 1439247_at   | 0.193988784  | 3.738547934 | 2.085789043  | 0.065320164 | 0.065320164 | -3.94803726  |
| 1458439_a_at | 0.317205923  | 8.838272535 | 2.085251753  | 0.065377945 | 0.065377945 | -3.94873759  |
| 1452848_at   | 0.218302674  | 9.624511245 | 2.084885074  | 0.065417407 | 0.065417407 | -3.949215512 |
| 1436667_at   | 0.17665382   | 3.425493635 | 2.084779578  | 0.065428764 | 0.065428764 | -3.949353009 |

|              |              |             |              |             |             |              |
|--------------|--------------|-------------|--------------|-------------|-------------|--------------|
| 1427330_at   | 0.157072315  | 5.409530364 | 2.084480429  | 0.06546098  | 0.06546098  | -3.949742892 |
| 1422344_s_at | -0.163159398 | 4.337608583 | -2.084476458 | 0.065461408 | 0.065461408 | -3.949748068 |
| 1444579_at   | -0.236393287 | 4.552009282 | -2.084438206 | 0.065465529 | 0.065465529 | -3.949797921 |
| 1449898_at   | -0.159335992 | 4.7311155   | -2.084259007 | 0.065484836 | 0.065484836 | -3.950031463 |
| 1422678_at   | 0.162225329  | 7.908740289 | 2.084156757  | 0.065495855 | 0.065495855 | -3.95016472  |
| 1445744_at   | -0.141010294 | 5.063374562 | -2.08389918  | 0.065523621 | 0.065523621 | -3.950500397 |
| 1445004_a_at | -0.149626783 | 3.52094963  | -2.083820114 | 0.065532146 | 0.065532146 | -3.950603434 |
| 1440456_at   | 0.205830121  | 4.42940036  | 2.083788196  | 0.065535588 | 0.065535588 | -3.950645028 |
| 1423053_at   | -0.148897556 | 11.10272961 | -2.083730564 | 0.065541803 | 0.065541803 | -3.950720133 |
| 1430107_at   | -0.173520175 | 3.398150503 | -2.083714212 | 0.065543566 | 0.065543566 | -3.950741442 |
| 1450427_at   | -0.196490562 | 5.39101702  | -2.083687458 | 0.065546452 | 0.065546452 | -3.950776306 |
| 1447812_x_at | -0.18967447  | 8.21862758  | -2.08284525  | 0.065637347 | 0.065637347 | -3.951873777 |
| 1438132_at   | 0.136207107  | 4.145294347 | 2.082665855  | 0.065656724 | 0.065656724 | -3.952107529 |
| 1437894_at   | -0.230969474 | 4.57694116  | -2.082231341 | 0.06570368  | 0.06570368  | -3.952673681 |
| 1441692_at   | 0.31005306   | 5.156285755 | 2.081906728  | 0.06573878  | 0.06573878  | -3.953096616 |
| 1438033_at   | 0.1988117    | 5.969948039 | 2.081627871  | 0.065768947 | 0.065768947 | -3.953459923 |
| 1439132_at   | -0.209046371 | 3.959698758 | -2.081602116 | 0.065771734 | 0.065771734 | -3.953493478 |
| 1432852_at   | 0.158382134  | 3.735896567 | 2.081313676  | 0.065802952 | 0.065802952 | -3.953869256 |
| 1421565_at   | 0.180662482  | 4.275711576 | 2.081172207  | 0.065818269 | 0.065818269 | -3.954053555 |
| 1433098_at   | -0.157265036 | 3.809286996 | -2.080833523 | 0.065854952 | 0.065854952 | -3.954494765 |
| 1417218_at   | 0.15870614   | 7.041952708 | 2.08037867   | 0.065904249 | 0.065904249 | -3.955087282 |
| 1436875_at   | 0.150154026  | 4.156327233 | 2.080257695  | 0.065917366 | 0.065917366 | -3.955244865 |
| 1448276_at   | -0.141824606 | 9.134337916 | -2.080228765 | 0.065920503 | 0.065920503 | -3.95528255  |
| 1417225_at   | 0.400472481  | 9.280765483 | 2.079582876  | 0.065990581 | 0.065990581 | -3.956123845 |
| 1428948_at   | -0.296768633 | 5.633238835 | -2.079567869 | 0.06599221  | 0.06599221  | -3.956143392 |
| 1433762_at   | 0.441776504  | 6.79752122  | 2.079557258  | 0.065993362 | 0.065993362 | -3.956157214 |
| 1415806_at   | 0.27824661   | 7.728366839 | 2.079268465  | 0.06602472  | 0.06602472  | -3.956533355 |
| 1450744_at   | -0.179217811 | 8.64836126  | -2.07917653  | 0.066034706 | 0.066034706 | -3.956653093 |
| 1421090_at   | -0.19238457  | 7.166822576 | -2.07842928  | 0.066115922 | 0.066115922 | -3.957626282 |
| 1458456_x_at | -0.186240129 | 3.558300812 | -2.078314937 | 0.066128358 | 0.066128358 | -3.95777519  |
| 1419652_s_at | -0.196633398 | 7.213798647 | -2.078276018 | 0.066132592 | 0.066132592 | -3.957825873 |
| 1437750_at   | -0.151620913 | 3.958737809 | -2.077922503 | 0.066171057 | 0.066171057 | -3.958286236 |
| 1418517_at   | -0.169645047 | 9.981987666 | -2.077911305 | 0.066172276 | 0.066172276 | -3.958300818 |
| 1459563_x_at | -0.146510146 | 4.722995923 | -2.07776808  | 0.066187866 | 0.066187866 | -3.958487327 |
| 1459437_at   | 0.314338043  | 5.993713909 | 2.077713637  | 0.066193793 | 0.066193793 | -3.958558221 |
| 1426617_a_at | 0.292975349  | 5.354576294 | 2.077640854  | 0.066201718 | 0.066201718 | -3.958652997 |
| 1429850_x_at | 0.124764536  | 7.667940728 | 2.077155456  | 0.066254591 | 0.066254591 | -3.95928505  |
| 1418516_at   | 0.136033722  | 10.24316661 | 2.077113675  | 0.066259144 | 0.066259144 | -3.959339451 |
| 1444590_at   | -0.178284177 | 4.286161993 | -2.07690157  | 0.066282263 | 0.066282263 | -3.959615627 |
| 1453176_a_at | -0.305381748 | 5.002024733 | -2.076799885 | 0.066293349 | 0.066293349 | -3.959748024 |
| 1452508_x_at | -0.179486604 | 5.823608782 | -2.076785646 | 0.066294901 | 0.066294901 | -3.959766564 |
| 1419774_at   | 0.134863201  | 4.020631109 | 2.076333168  | 0.066344254 | 0.066344254 | -3.960355687 |
| 1432707_at   | 0.160061914  | 3.577172855 | 2.076053695  | 0.066374754 | 0.066374754 | -3.960719542 |
| 1432282_a_at | 0.164076633  | 8.495653628 | 2.075881652  | 0.066393537 | 0.066393537 | -3.960943524 |
| 1439946_at   | -0.155750112 | 8.381108403 | -2.075865673 | 0.066395282 | 0.066395282 | -3.960964326 |
| 1419220_at   | -0.255950482 | 4.554245195 | -2.075864524 | 0.066395407 | 0.066395407 | -3.960965822 |
| 1453168_at   | -0.211198244 | 5.455039811 | -2.075573869 | 0.066427151 | 0.066427151 | -3.961344213 |
| 1454326_at   | -0.178486743 | 3.696493165 | -2.075348176 | 0.066451811 | 0.066451811 | -3.961638023 |
| 1455554_at   | -0.260863379 | 6.662806288 | -2.075143052 | 0.066474231 | 0.066474231 | -3.961905049 |
| 1444026_at   | 0.131244618  | 4.609941561 | 2.074756198  | 0.066516533 | 0.066516533 | -3.962408626 |
| 1436263_at   | -0.195714521 | 5.343179408 | -2.074465411 | 0.066548347 | 0.066548347 | -3.962787136 |
| 1442596_at   | -0.174780764 | 5.242112143 | -2.074154427 | 0.066582387 | 0.066582387 | -3.963191919 |
| 1443273_at   | 0.310034958  | 8.250811666 | 2.07412697   | 0.066585393 | 0.066585393 | -3.963227657 |



|              |              |             |              |             |             |              |
|--------------|--------------|-------------|--------------|-------------|-------------|--------------|
| 1424763_at   | -0.341674566 | 7.499136056 | -2.074064564 | 0.066592226 | 0.066592226 | -3.963308884 |
| 1434130_at   | -0.159415249 | 8.712877841 | -2.07397567  | 0.066601961 | 0.066601961 | -3.963424586 |
| 1442843_at   | 0.151426555  | 6.928721051 | 2.07394207   | 0.066605641 | 0.066605641 | -3.963468318 |
| 1426484_at   | 0.217805023  | 8.544860232 | 2.073929716  | 0.066606994 | 0.066606994 | -3.963484399 |
| 1438783_at   | 0.249748558  | 6.624818383 | 2.073855429  | 0.066615131 | 0.066615131 | -3.963581086 |
| 1438423_at   | 0.217384085  | 7.076060343 | 2.073600545  | 0.066643056 | 0.066643056 | -3.963912824 |
| 1458075_at   | 0.151312144  | 6.466715042 | 2.073545112  | 0.06664913  | 0.06664913  | -3.96398497  |
| 1446224_at   | 0.228334149  | 6.279388716 | 2.073411227  | 0.066663804 | 0.066663804 | -3.96415922  |
| 1419519_at   | -0.183230154 | 9.253687771 | -2.073408237 | 0.066664132 | 0.066664132 | -3.964163111 |
| 1424982_a_at | 0.143197369  | 7.097511673 | 2.073316877  | 0.066674147 | 0.066674147 | -3.964282012 |
| 1451372_a_at | -0.313104584 | 5.723967192 | -2.073230857 | 0.066683578 | 0.066683578 | -3.964393963 |
| 1437106_at   | 0.325455297  | 7.231543031 | 2.07320394   | 0.06668653  | 0.06668653  | -3.964428995 |
| 1434869_at   | 0.242116334  | 7.092972783 | 2.073126727  | 0.066694997 | 0.066694997 | -3.964529482 |
| 1441066_at   | -0.168464137 | 3.483368333 | -2.073070289 | 0.066701186 | 0.066701186 | -3.964602932 |
| 1459429_at   | -0.225350906 | 3.784047359 | -2.072972907 | 0.066711867 | 0.066711867 | -3.964729666 |
| 1419110_at   | 0.156751682  | 8.340419711 | 2.07287954   | 0.066722109 | 0.066722109 | -3.964851172 |
| 1420329_at   | -0.230988793 | 7.210380038 | -2.072739591 | 0.066737464 | 0.066737464 | -3.965033299 |
| 1418531_at   | 0.189017363  | 3.92709658  | 2.072333561  | 0.066782032 | 0.066782032 | -3.965561676 |
| 1430026_at   | -0.308812762 | 6.683118267 | -2.072099116 | 0.066807779 | 0.066807779 | -3.965866754 |
| 1453428_at   | -0.22147466  | 4.67665617  | -2.072006732 | 0.066817927 | 0.066817927 | -3.965986969 |
| 1451149_at   | -0.132835926 | 8.336443624 | -2.07195615  | 0.066823484 | 0.066823484 | -3.966052787 |
| 1432185_a_at | -0.187891406 | 4.555298755 | -2.071778756 | 0.066842977 | 0.066842977 | -3.966283616 |
| 1435459_at   | 0.314572523  | 5.981622939 | 2.071756557  | 0.066845416 | 0.066845416 | -3.966312501 |
| 1434100_x_at | -0.234835652 | 4.495230529 | -2.071539781 | 0.066869244 | 0.066869244 | -3.966594566 |
| 1424861_at   | 0.218767663  | 8.080613112 | 2.071384707  | 0.066886294 | 0.066886294 | -3.96679634  |
| 1448593_at   | -0.161503452 | 9.478874832 | -2.07122102  | 0.066904296 | 0.066904296 | -3.967009317 |
| 1430804_at   | -0.135786426 | 3.183692999 | -2.070892753 | 0.066940413 | 0.066940413 | -3.96743642  |
| 1459348_at   | -0.221623385 | 6.970798084 | -2.070548271 | 0.066978333 | 0.066978333 | -3.9678846   |
| 1417097_at   | -0.14952014  | 7.105002735 | -2.070369986 | 0.066997967 | 0.066997967 | -3.968116546 |
| 1457840_at   | -0.148537685 | 4.712891219 | -2.070366613 | 0.066998338 | 0.066998338 | -3.968120934 |
| 1423296_at   | 0.128286002  | 10.75184084 | 2.070259609  | 0.067010125 | 0.067010125 | -3.968260141 |
| 1426964_at   | 0.142767867  | 10.32855396 | 2.069844908  | 0.067055823 | 0.067055823 | -3.968799632 |
| 1417300_at   | -0.220711837 | 7.627788889 | -2.069794159 | 0.067061417 | 0.067061417 | -3.96886565  |
| 1432106_at   | -0.19709096  | 5.129079537 | -2.069568952 | 0.067086248 | 0.067086248 | -3.969158611 |
| 1423748_at   | 0.180874231  | 9.005941081 | 2.069233889  | 0.067123208 | 0.067123208 | -3.969594464 |
| 1417212_at   | -0.183360758 | 6.867512575 | -2.069075392 | 0.067140699 | 0.067140699 | -3.96980063  |
| 1453196_a_at | 0.238249927  | 4.399554603 | 2.069035631  | 0.067145087 | 0.067145087 | -3.969852349 |
| 1442730_at   | 0.175773771  | 3.8703568   | 2.068837961  | 0.067166908 | 0.067166908 | -3.970109465 |
| 1434229_a_at | 0.169463447  | 8.125709798 | 2.068641973  | 0.067188549 | 0.067188549 | -3.970364385 |
| 1440682_at   | 0.238084775  | 8.150627177 | 2.068409148  | 0.067214267 | 0.067214267 | -3.970667211 |
| 1417569_at   | -0.146377984 | 7.696745616 | -2.06839183  | 0.06721618  | 0.06721618  | -3.970689736 |
| 1432541_at   | -0.123657913 | 5.615985043 | -2.068244507 | 0.067232459 | 0.067232459 | -3.970881347 |
| 1449546_a_at | 0.179422781  | 8.404928871 | 2.06814015   | 0.067243992 | 0.067243992 | -3.971017075 |
| 1450547_x_at | -0.204629436 | 3.931330797 | -2.067955729 | 0.067264379 | 0.067264379 | -3.971256928 |
| 1426321_at   | 0.134537425  | 4.374386347 | 2.067742687  | 0.067287936 | 0.067287936 | -3.971534    |
| 1415999_at   | 0.205231846  | 8.529404935 | 2.067708811  | 0.067291683 | 0.067291683 | -3.971578056 |
| 1453304_s_at | 0.302648344  | 9.1227668   | 2.067526033  | 0.067311902 | 0.067311902 | -3.97181576  |
| 1436736_x_at | 0.187299264  | 11.72833597 | 2.067264691  | 0.067340821 | 0.067340821 | -3.972155627 |
| 1447411_at   | -0.231742444 | 5.64337971  | -2.067166148 | 0.067351728 | 0.067351728 | -3.972283777 |
| 1419042_at   | 0.19270486   | 4.727628767 | 2.067047066  | 0.067364912 | 0.067364912 | -3.972438633 |
| 1432583_at   | 0.170578763  | 5.319539631 | 2.066963479  | 0.067374167 | 0.067374167 | -3.97254733  |
| 1438227_at   | 0.18226041   | 3.968858564 | 2.066559164  | 0.067418951 | 0.067418951 | -3.973073087 |
| 1437977_at   | 0.170441002  | 7.653113783 | 2.066332543  | 0.067444066 | 0.067444066 | -3.973367765 |

|              |              |             |              |             |             |              |
|--------------|--------------|-------------|--------------|-------------|-------------|--------------|
| 1457121_at   | -0.169868249 | 6.825140429 | -2.06612168  | 0.067467442 | 0.067467442 | -3.973641944 |
| 1453717_s_at | 0.195275512  | 3.514784364 | 2.066060835  | 0.067474189 | 0.067474189 | -3.973721059 |
| 1430372_at   | -0.215801026 | 5.326587789 | -2.065650017 | 0.067519759 | 0.067519759 | -3.974255208 |
| 1449400_at   | -0.196792709 | 4.092742683 | -2.065552117 | 0.067530623 | 0.067530623 | -3.974382494 |
| 1421976_at   | -0.164220854 | 4.371210772 | -2.065330813 | 0.067555187 | 0.067555187 | -3.97467022  |
| 1438443_at   | -0.165341049 | 7.856483781 | -2.065109537 | 0.067579757 | 0.067579757 | -3.974957903 |
| 1419338_at   | -0.1955424   | 3.438767349 | -2.064870226 | 0.067606338 | 0.067606338 | -3.975269023 |
| 1449229_a_at | -0.385896031 | 5.871454292 | -2.064779158 | 0.067616456 | 0.067616456 | -3.975387414 |
| 1459836_x_at | 0.197716246  | 4.691832542 | 2.064596682  | 0.067636735 | 0.067636735 | -3.975624636 |
| 1456867_x_at | -0.177039449 | 9.005377765 | -2.064489214 | 0.06764868  | 0.06764868  | -3.975764343 |
| 1428852_at   | 0.206085686  | 4.266645535 | 2.064070015  | 0.067695295 | 0.067695295 | -3.976309278 |
| 1455292_x_at | 0.182754176  | 5.192869016 | 2.063753589  | 0.067730502 | 0.067730502 | -3.976720595 |
| 1459581_at   | 0.191211251  | 6.72470156  | 2.063720009  | 0.067734239 | 0.067734239 | -3.976764244 |
| 1432897_at   | 0.168776178  | 3.566146668 | 2.063700372  | 0.067736425 | 0.067736425 | -3.976789769 |
| 1441693_at   | -0.138528354 | 7.798296606 | -2.063654739 | 0.067741504 | 0.067741504 | -3.976849084 |
| 1452679_at   | 0.436439314  | 9.342026499 | 2.06344932   | 0.067764373 | 0.067764373 | -3.977116093 |
| 1417841_at   | -0.154092292 | 6.295785002 | -2.063392859 | 0.06777066  | 0.06777066  | -3.977189481 |
| 1455812_x_at | -0.198931807 | 9.598074585 | -2.063392704 | 0.067770677 | 0.067770677 | -3.977189682 |
| 1433146_at   | -0.162301228 | 4.980503053 | -2.063167492 | 0.06779576  | 0.06779576  | -3.977482408 |
| 1448473_at   | 0.19815212   | 8.281881653 | 2.06294879   | 0.067820126 | 0.067820126 | -3.977766662 |
| 1435804_at   | -0.148270582 | 7.069720321 | -2.062836194 | 0.067832674 | 0.067832674 | -3.977913006 |
| 1427184_at   | -0.19900204  | 3.411227802 | -2.062766473 | 0.067840445 | 0.067840445 | -3.978003621 |
| 1438490_at   | -0.13181865  | 5.921170794 | -2.062526754 | 0.06786717  | 0.06786717  | -3.978315176 |
| 1448249_at   | -0.147567372 | 5.41932171  | -2.06251846  | 0.067868095 | 0.067868095 | -3.978325956 |
| 1425401_at   | 0.170054261  | 4.621740116 | 2.062486904  | 0.067871614 | 0.067871614 | -3.978366967 |
| 1423520_at   | 0.468920812  | 8.284478642 | 2.062436056  | 0.067877285 | 0.067877285 | -3.978433051 |
| 1456550_at   | 0.247390691  | 5.701776704 | 2.062117424  | 0.067912828 | 0.067912828 | -3.978847147 |
| 1437486_at   | -0.145286721 | 5.832701767 | -2.061919636 | 0.0679349   | 0.0679349   | -3.979104185 |
| 1443574_at   | -0.173062835 | 4.637431137 | -2.061887145 | 0.067938527 | 0.067938527 | -3.979146407 |
| 1440540_at   | 0.19281304   | 6.278208629 | 2.06133477   | 0.068000209 | 0.068000209 | -3.979864215 |
| 1447944_at   | 0.435301418  | 6.521612959 | 2.061304442  | 0.068003597 | 0.068003597 | -3.979903624 |
| 1436482_a_at | -0.169458201 | 6.933400773 | -2.061144246 | 0.068021497 | 0.068021497 | -3.980111787 |
| 1416398_at   | -0.191190821 | 6.093498016 | -2.061135189 | 0.068022509 | 0.068022509 | -3.980123556 |
| 1425373_a_at | -0.138955388 | 9.749906405 | -2.061102887 | 0.068026119 | 0.068026119 | -3.980165529 |
| 1457969_at   | -0.266498932 | 4.874421261 | -2.060935994 | 0.068044773 | 0.068044773 | -3.980382389 |
| 1447324_at   | -0.15573827  | 5.14695026  | -2.060670783 | 0.068074426 | 0.068074426 | -3.980726992 |
| 1438274_at   | 0.183446078  | 6.954624364 | 2.06048343   | 0.068095381 | 0.068095381 | -3.980970423 |
| 1423887_a_at | -0.144201879 | 5.987732084 | -2.059961061 | 0.06815384  | 0.06815384  | -3.981649114 |
| 1460151_at   | 0.185045008  | 5.775639898 | 2.0590992    | 0.068250396 | 0.068250396 | -3.98276879  |
| 1430413_at   | -0.224681702 | 5.758058807 | -2.05884558  | 0.068278835 | 0.068278835 | -3.983098252 |
| 1421608_at   | 0.141652529  | 5.722030889 | 2.058827804  | 0.068280829 | 0.068280829 | -3.983121344 |
| 1439041_at   | 0.145265226  | 9.220402981 | 2.058812717  | 0.068282521 | 0.068282521 | -3.983140942 |
| 1420338_at   | -0.173561818 | 4.727395039 | -2.058753524 | 0.06828916  | 0.06828916  | -3.983217835 |
| 1438413_at   | 0.142744844  | 7.503308692 | 2.058416861  | 0.068326933 | 0.068326933 | -3.983655151 |
| 1435716_x_at | 0.192817186  | 9.08622605  | 2.058362116  | 0.068333078 | 0.068333078 | -3.983726262 |
| 1429074_at   | -0.925097884 | 6.428622341 | -2.058089212 | 0.068363714 | 0.068363714 | -3.984080741 |
| 1453198_at   | 0.146534578  | 8.016149388 | 2.05743318   | 0.068437416 | 0.068437416 | -3.984932818 |
| 1450980_at   | 0.130165177  | 7.548126449 | 2.057295151  | 0.068452932 | 0.068452932 | -3.985112085 |
| 1448716_at   | 0.389902297  | 9.241616584 | 2.057268224  | 0.06845596  | 0.06845596  | -3.985147057 |
| 1423588_at   | -0.157114948 | 9.027428402 | -2.056884976 | 0.068499062 | 0.068499062 | -3.985644787 |
| 1419046_at   | -0.144323541 | 7.462799326 | -2.05665544  | 0.068524889 | 0.068524889 | -3.985942877 |
| 1446287_at   | -0.174852727 | 5.459482769 | -2.056337087 | 0.068560725 | 0.068560725 | -3.986356296 |
| 1452316_at   | -0.199469496 | 7.183274908 | -2.056134979 | 0.068583485 | 0.068583485 | -3.986618748 |

|              |              |             |              |             |             |              |
|--------------|--------------|-------------|--------------|-------------|-------------|--------------|
| 1435857_s_at | 0.249875367  | 8.820197164 | 2.055959088  | 0.068603299 | 0.068603299 | -3.98684715  |
| 1444840_at   | -0.158399833 | 3.539250702 | -2.055399685 | 0.068666635 | 0.068666635 | -3.98757352  |
| 1443517_at   | 0.542119794  | 4.657138048 | 2.05529876   | 0.068677732 | 0.068677732 | -3.987704564 |
| 1419472_s_at | -0.170634247 | 10.94674676 | -2.055267791 | 0.068681225 | 0.068681225 | -3.987744775 |
| 1446968_at   | 0.464848517  | 5.389762586 | 2.054982015  | 0.068713463 | 0.068713463 | -3.98811582  |
| 1454423_at   | -0.19450339  | 5.353604061 | -2.054949222 | 0.068717163 | 0.068717163 | -3.988158397 |
| 1451999_at   | -0.303028835 | 4.895808162 | -2.054735163 | 0.068741322 | 0.068741322 | -3.988436317 |
| 1439594_at   | 0.191076909  | 4.610566463 | 2.054630238  | 0.068753167 | 0.068753167 | -3.988572541 |
| 1427631_x_at | -0.15338183  | 3.399836147 | -2.054600223 | 0.068756556 | 0.068756556 | -3.98861151  |
| 1428456_at   | 0.201569499  | 3.836213542 | 2.054500557  | 0.068767809 | 0.068767809 | -3.988740905 |
| 1435971_at   | 0.143000618  | 4.949234908 | 2.054368877  | 0.06878268  | 0.06878268  | -3.98891186  |
| 1437303_at   | 0.312559193  | 9.072242814 | 2.054111063  | 0.068811804 | 0.068811804 | -3.989246561 |
| 1451596_a_at | -0.177843169 | 5.113598384 | -2.05396224  | 0.068828622 | 0.068828622 | -3.989439762 |
| 1420007_at   | -0.173714077 | 3.450423373 | -2.053798377 | 0.068847143 | 0.068847143 | -3.989652482 |
| 1424902_at   | -0.144836783 | 4.796153648 | -2.053706563 | 0.068857523 | 0.068857523 | -3.98977167  |
| 1429639_at   | 0.24928776   | 7.619734719 | 2.053503503  | 0.068880485 | 0.068880485 | -3.990035266 |
| 1425683_at   | -0.159018474 | 3.224536309 | -2.053233589 | 0.068911018 | 0.068911018 | -3.990385636 |
| 1452861_at   | -0.243731411 | 6.974578796 | -2.053137412 | 0.068921901 | 0.068921901 | -3.990510478 |
| 1431720_at   | 0.144073394  | 3.669597894 | 2.052821585  | 0.068957649 | 0.068957649 | -3.990920424 |
| 1429031_at   | 0.184434773  | 7.686162391 | 2.05246245   | 0.068998322 | 0.068998322 | -3.991386563 |
| 1447780_x_at | 0.148616981  | 8.011182339 | 2.052379606  | 0.069007707 | 0.069007707 | -3.991494087 |
| 1427881_at   | 0.157391618  | 8.365248487 | 2.052325128  | 0.069013879 | 0.069013879 | -3.991564794 |
| 1421034_a_at | 0.237022159  | 6.251225963 | 2.051976148  | 0.069053432 | 0.069053432 | -3.992017723 |
| 1435950_at   | -0.162063889 | 6.38126176  | -2.051630926 | 0.06909258  | 0.06909258  | -3.992465754 |
| 1457148_at   | -0.181068239 | 4.905350257 | -2.051160084 | 0.069146007 | 0.069146007 | -3.993076782 |
| 1460058_at   | -0.16573085  | 4.672893235 | -2.050826347 | 0.069183901 | 0.069183901 | -3.99350986  |
| 1444501_at   | 0.192250181  | 5.82927866  | 2.050278669  | 0.069246129 | 0.069246129 | -3.994220521 |
| 1453337_at   | -0.142962457 | 4.244249617 | -2.050216197 | 0.069253231 | 0.069253231 | -3.99430158  |
| 1456302_at   | -0.197126796 | 5.95448133  | -2.050053    | 0.069271786 | 0.069271786 | -3.994513331 |
| 1447448_s_at | 0.205991052  | 6.901151026 | 2.049783135  | 0.069302479 | 0.069302479 | -3.994863475 |
| 1452406_x_at | -0.27726195  | 12.05099971 | -2.0496955   | 0.069312449 | 0.069312449 | -3.994977175 |
| 1458653_at   | -0.136777784 | 6.444042701 | -2.049692416 | 0.0693128   | 0.0693128   | -3.994981177 |
| 1417740_at   | -0.163851934 | 7.934489696 | -2.049658612 | 0.069316646 | 0.069316646 | -3.995025035 |
| 1431703_at   | 0.142311499  | 4.167584685 | 2.049554782  | 0.069328461 | 0.069328461 | -3.995159747 |
| 1419784_x_at | -0.143587828 | 3.998083545 | -2.049378286 | 0.069348549 | 0.069348549 | -3.995388733 |
| 1429891_at   | -0.626806686 | 6.287981705 | -2.049295966 | 0.06935792  | 0.06935792  | -3.995495532 |
| 1420791_x_at | -0.170076452 | 5.797054584 | -2.049129528 | 0.069376871 | 0.069376871 | -3.995711462 |
| 1439093_at   | -0.708423923 | 6.651706445 | -2.049072684 | 0.069383344 | 0.069383344 | -3.995785207 |
| 1437691_at   | -0.207115037 | 3.461234461 | -2.048681112 | 0.069427952 | 0.069427952 | -3.996293191 |
| 1424192_at   | -0.186841782 | 9.416094276 | -2.048622234 | 0.069434662 | 0.069434662 | -3.996369571 |
| 1429419_at   | -0.358359873 | 5.800741319 | -2.048607056 | 0.069436392 | 0.069436392 | -3.99638926  |
| 1456871_a_at | 0.131859345  | 9.13821935  | 2.048463834  | 0.069452717 | 0.069452717 | -3.996575054 |
| 1416035_at   | 0.198081724  | 8.673054516 | 2.047687284  | 0.069541293 | 0.069541293 | -3.997582358 |
| 1452447_at   | -0.122094323 | 4.329376859 | -2.047208951 | 0.069595907 | 0.069595907 | -3.998202777 |
| 1427512_a_at | 0.257461429  | 8.1615071   | 2.047186618  | 0.069598458 | 0.069598458 | -3.998231743 |
| 1424408_at   | -0.192425823 | 5.247988986 | -2.046796743 | 0.069643004 | 0.069643004 | -3.998737397 |
| 1426938_at   | 0.180391903  | 5.164947572 | 2.046715466  | 0.069652294 | 0.069652294 | -3.998842807 |
| 1420798_s_at | 0.319469887  | 7.597279285 | 2.046323177  | 0.06969715  | 0.06969715  | -3.999351559 |
| 1421412_at   | -0.223105413 | 6.960393169 | -2.046123332 | 0.069720011 | 0.069720011 | -3.999610724 |
| 1457038_at   | 0.230787076  | 7.934584931 | 2.046084518  | 0.069724452 | 0.069724452 | -3.999661058 |
| 1460302_at   | -0.228289417 | 8.844934399 | -2.046039897 | 0.069729558 | 0.069729558 | -3.999718922 |
| 1456593_at   | -0.234878927 | 3.789953296 | -2.045908308 | 0.069744617 | 0.069744617 | -3.999889565 |
| 1431769_at   | -0.198379549 | 4.369184609 | -2.045650961 | 0.069774076 | 0.069774076 | -4.000223279 |

|              |              |             |              |             |             |              |
|--------------|--------------|-------------|--------------|-------------|-------------|--------------|
| 1438160_x_at | 0.172305141  | 4.475217728 | 2.045536928  | 0.069787134 | 0.069787134 | -4.000371148 |
| 1455390_at   | 0.149357646  | 8.523018179 | 2.045535358  | 0.069787314 | 0.069787314 | -4.000373184 |
| 1455162_at   | -0.154109315 | 5.995647611 | -2.045414561 | 0.069801149 | 0.069801149 | -4.000529821 |
| 1456006_at   | 0.249925706  | 6.481843011 | 2.045362658  | 0.069807094 | 0.069807094 | -4.000597122 |
| 1425412_at   | 0.136786399  | 5.824341534 | 2.045332675  | 0.069810529 | 0.069810529 | -4.000636001 |
| 1423812_s_at | 0.148681781  | 8.832499879 | 2.044676314  | 0.069885757 | 0.069885757 | -4.001487048 |
| 1450693_at   | 0.171478159  | 6.066858517 | 2.044629732  | 0.069891099 | 0.069891099 | -4.001547443 |
| 1434186_at   | 0.165969257  | 8.515250283 | 2.044561084  | 0.069898972 | 0.069898972 | -4.001636448 |
| 1456681_at   | -0.123838396 | 4.458109487 | -2.044403525 | 0.069917045 | 0.069917045 | -4.001840728 |
| 1437436_s_at | 0.16856132   | 9.167827818 | 2.043947371  | 0.069969395 | 0.069969395 | -4.002432116 |
| 1435511_at   | 0.22501977   | 5.070569687 | 2.043707956  | 0.069996886 | 0.069996886 | -4.002742496 |
| 1432990_at   | -0.172109146 | 4.035901451 | -2.043632627 | 0.070005537 | 0.070005537 | -4.00284015  |
| 1423180_at   | 0.333119219  | 5.976048445 | 2.043419223  | 0.070030053 | 0.070030053 | -4.003116797 |
| 1459544_at   | -0.149377869 | 3.319835353 | -2.043361541 | 0.070036681 | 0.070036681 | -4.003191571 |
| 1451843_a_at | 0.296453119  | 6.000082503 | 2.043320048  | 0.070041449 | 0.070041449 | -4.00324536  |
| 1435985_at   | -0.125307812 | 8.952944303 | -2.043301932 | 0.070043531 | 0.070043531 | -4.003268843 |
| 1420558_at   | 0.194044836  | 4.787750139 | 2.04326173   | 0.070048151 | 0.070048151 | -4.003320958 |
| 1456556_at   | 0.14953948   | 3.826963085 | 2.04319718   | 0.07005557  | 0.07005557  | -4.003404634 |
| 1421425_a_at | -0.243063417 | 7.431786606 | -2.042861206 | 0.070094197 | 0.070094197 | -4.003840146 |
| 1441755_at   | -0.250563207 | 6.05724822  | -2.042423044 | 0.070144602 | 0.070144602 | -4.004408089 |
| 1446185_at   | -0.274842693 | 4.354195016 | -2.042407357 | 0.070146407 | 0.070146407 | -4.004428422 |
| 1455859_at   | -0.473982258 | 5.527095794 | -2.042339324 | 0.070154237 | 0.070154237 | -4.004516602 |
| 1446345_at   | 0.168540115  | 7.371673256 | 2.041630207  | 0.070235897 | 0.070235897 | -4.005435674 |
| 1452949_at   | 0.175709473  | 6.657158586 | 2.041538525  | 0.070246461 | 0.070246461 | -4.005554494 |
| 1456763_at   | -0.133369674 | 7.627579944 | -2.04140322  | 0.070262055 | 0.070262055 | -4.005729848 |
| 1443913_at   | 0.210262335  | 6.938243075 | 2.041105751  | 0.07029635  | 0.07029635  | -4.006115353 |
| 1437229_at   | -0.195157133 | 4.870467286 | -2.040867241 | 0.070323859 | 0.070323859 | -4.006424438 |
| 1457619_at   | -0.150906908 | 3.578351802 | -2.040753092 | 0.070337029 | 0.070337029 | -4.00657236  |
| 1445336_at   | -0.129889233 | 4.236807997 | -2.040728045 | 0.070339919 | 0.070339919 | -4.006604818 |
| 1452333_at   | 0.168132122  | 8.310521467 | 2.039995074  | 0.07042454  | 0.07042454  | -4.007554594 |
| 1419193_a_at | -0.13756277  | 5.250751968 | -2.039948442 | 0.070429927 | 0.070429927 | -4.007615016 |
| 1422579_at   | -0.196690074 | 9.499145016 | -2.039456454 | 0.070486786 | 0.070486786 | -4.008252472 |
| 1443065_at   | 0.160350234  | 4.708379372 | 2.039294637  | 0.070505496 | 0.070505496 | -4.008462124 |
| 1454922_at   | -0.205463709 | 8.855479246 | -2.039182236 | 0.070518496 | 0.070518496 | -4.008607749 |
| 1422606_at   | 0.597873127  | 7.794206709 | 2.039001554  | 0.070539397 | 0.070539397 | -4.008841834 |
| 1459971_at   | -0.21777975  | 4.09467513  | -2.038827631 | 0.070559522 | 0.070559522 | -4.009067157 |
| 1444243_at   | -0.19242372  | 3.72114706  | -2.038604586 | 0.070585339 | 0.070585339 | -4.009356111 |
| 1429987_at   | -0.411984867 | 4.622308757 | -2.038161354 | 0.070636669 | 0.070636669 | -4.00993029  |
| 1419818_x_at | -0.140459276 | 8.224578648 | -2.037887864 | 0.070668359 | 0.070668359 | -4.01028456  |
| 1448816_at   | -0.203768545 | 8.76478784  | -2.037691494 | 0.070691121 | 0.070691121 | -4.010538924 |
| 1435782_at   | 0.130704792  | 5.18618605  | 2.037650802  | 0.070695839 | 0.070695839 | -4.010591634 |
| 1454708_at   | 0.131137631  | 8.062491023 | 2.037594379  | 0.070702381 | 0.070702381 | -4.010664717 |
| 1459878_a_at | 0.189134714  | 5.506664105 | 2.037421798  | 0.070722394 | 0.070722394 | -4.010888259 |
| 1434429_at   | 0.236681043  | 5.126228447 | 2.037215746  | 0.070746296 | 0.070746296 | -4.011155146 |
| 1458483_at   | -0.20663893  | 4.968462787 | -2.03719057  | 0.070749218 | 0.070749218 | -4.011187755 |
| 1436063_at   | -0.170928635 | 6.195470926 | -2.036837903 | 0.070790147 | 0.070790147 | -4.011644525 |
| 1443268_at   | -0.156163531 | 3.782492513 | -2.036606317 | 0.070817036 | 0.070817036 | -4.011944462 |
| 1453929_at   | 0.170293926  | 4.551744444 | 2.036459664  | 0.070834069 | 0.070834069 | -4.012134393 |
| 1460333_at   | 0.150833538  | 7.470915775 | 2.036300036  | 0.070852613 | 0.070852613 | -4.012341122 |
| 1448592_at   | -0.17734743  | 10.92453077 | -2.036292773 | 0.070853457 | 0.070853457 | -4.012350529 |
| 1434583_at   | 0.244279027  | 7.859557432 | 2.036035687  | 0.070883333 | 0.070883333 | -4.012683465 |
| 1428866_at   | -0.166833817 | 6.266453045 | -2.035918842 | 0.070896915 | 0.070896915 | -4.01283478  |
| 1422919_at   | -0.215116928 | 4.492700384 | -2.035754823 | 0.070915986 | 0.070915986 | -4.013047181 |

|              |              |             |              |             |             |              |
|--------------|--------------|-------------|--------------|-------------|-------------|--------------|
| 1457911_at   | -0.188604852 | 3.95128952  | -2.035649445 | 0.070928241 | 0.070928241 | -4.013183641 |
| 1453364_x_at | 0.164290986  | 6.351244333 | 2.035561169  | 0.070938508 | 0.070938508 | -4.013297953 |
| 1429466_s_at | -0.250827341 | 5.831655971 | -2.035358729 | 0.07096206  | 0.07096206  | -4.013560095 |
| 1444543_at   | -0.195433093 | 7.097460096 | -2.034873481 | 0.071018543 | 0.071018543 | -4.014188417 |
| 1426756_at   | -0.266336673 | 9.215956466 | -2.034225707 | 0.071094012 | 0.071094012 | -4.015027121 |
| 1441858_at   | 0.291220421  | 5.519052601 | 2.034052808  | 0.071114168 | 0.071114168 | -4.015250967 |
| 1422641_at   | -0.137579559 | 4.380188252 | -2.033425805 | 0.071187309 | 0.071187309 | -4.016062686 |
| 1437700_at   | -0.139126202 | 6.407616737 | -2.033092903 | 0.071226172 | 0.071226172 | -4.016493632 |
| 1418892_at   | 0.155015603  | 8.146889054 | 2.032798175  | 0.071260595 | 0.071260595 | -4.016875144 |
| 1437165_a_at | -0.228005999 | 11.36975728 | -2.032643243 | 0.071278697 | 0.071278697 | -4.017075691 |
| 1417409_at   | 0.139908212  | 9.405645396 | 2.032271256  | 0.071322177 | 0.071322177 | -4.01755718  |
| 1443111_at   | 0.211752746  | 4.078113937 | 2.032011483  | 0.071352555 | 0.071352555 | -4.017893406 |
| 1454554_at   | -0.141793747 | 3.53533827  | -2.031406131 | 0.071423395 | 0.071423395 | -4.018676871 |
| 1449893_a_at | -0.149023835 | 8.185867529 | -2.031164139 | 0.071451732 | 0.071451732 | -4.018990047 |
| 1423738_at   | 0.186951294  | 7.343419356 | 2.031111846  | 0.071457857 | 0.071457857 | -4.019057721 |
| 1420825_at   | 0.171090632  | 5.606442649 | 2.030920537  | 0.071480269 | 0.071480269 | -4.019305295 |
| 1455049_at   | 0.16668077   | 8.653602832 | 2.03083759   | 0.071489988 | 0.071489988 | -4.019412635 |
| 1422737_at   | -0.200208162 | 6.416320621 | -2.030630173 | 0.071514298 | 0.071514298 | -4.019681043 |
| 1443255_s_at | -0.190552633 | 4.999318874 | -2.030356843 | 0.071546344 | 0.071546344 | -4.020034736 |
| 1427915_s_at | 0.239277121  | 7.161071849 | 2.030149523  | 0.07157066  | 0.07157066  | -4.020303001 |
| 1459627_at   | 0.143285618  | 4.120612748 | 2.029835573  | 0.071607498 | 0.071607498 | -4.020709228 |
| 1420397_a_at | -0.252591476 | 7.390662728 | -2.029527595 | 0.071643653 | 0.071643653 | -4.021107709 |
| 1433313_at   | -0.143366768 | 3.81242812  | -2.029283354 | 0.071672337 | 0.071672337 | -4.02142371  |
| 1459392_at   | -0.145550793 | 5.311966753 | -2.028784451 | 0.071730965 | 0.071730965 | -4.022069163 |
| 1429394_at   | 0.188455626  | 6.229981353 | 2.028644974  | 0.071747363 | 0.071747363 | -4.022249603 |
| 1419599_s_at | 0.483883829  | 6.488509586 | 2.028542936  | 0.071759362 | 0.071759362 | -4.022381605 |
| 1441022_at   | 0.22174465   | 6.225852078 | 2.028539302  | 0.071759789 | 0.071759789 | -4.022386307 |
| 1455808_at   | -0.145987078 | 3.375375634 | -2.028519207 | 0.071762153 | 0.071762153 | -4.022412303 |
| 1419360_a_at | 0.165094142  | 10.65802555 | 2.028506762  | 0.071763616 | 0.071763616 | -4.022428402 |
| 1430817_at   | -0.209963851 | 3.398513031 | -2.028080773 | 0.071813733 | 0.071813733 | -4.022979466 |
| 1434332_at   | 0.133778047  | 9.880030593 | 2.027663264  | 0.071862885 | 0.071862885 | -4.023519526 |
| 1460256_at   | -0.215681836 | 8.324954562 | -2.027436189 | 0.071889631 | 0.071889631 | -4.023813242 |
| 1446755_at   | -0.165281079 | 4.789057029 | -2.027387693 | 0.071895344 | 0.071895344 | -4.023875969 |
| 1451094_at   | 0.150341734  | 6.290743426 | 2.027312201  | 0.071904239 | 0.071904239 | -4.023973613 |
| 1431050_at   | -0.238036565 | 6.824527437 | -2.026755798 | 0.071969827 | 0.071969827 | -4.024693253 |
| 1455300_at   | -0.145977788 | 8.625002401 | -2.026616499 | 0.071986257 | 0.071986257 | -4.02487341  |
| 1436024_at   | -0.202902516 | 4.467285141 | -2.026532652 | 0.071996148 | 0.071996148 | -4.024981849 |
| 1433029_at   | -0.226562981 | 5.043799138 | -2.026350184 | 0.072017677 | 0.072017677 | -4.025217829 |
| 1426748_s_at | 0.167265894  | 6.592776711 | 2.026279522  | 0.072026016 | 0.072026016 | -4.025309213 |
| 1453055_at   | 0.160056477  | 9.911476391 | 2.026099581  | 0.072047255 | 0.072047255 | -4.025541916 |
| 1455058_at   | 0.167165964  | 8.919603465 | 2.025963006  | 0.07206338  | 0.07206338  | -4.025718534 |
| 1443017_at   | 0.240886365  | 4.012343721 | 2.025448185  | 0.072124193 | 0.072124193 | -4.026384266 |
| 1449844_at   | -0.144841977 | 3.588319948 | -2.025447329 | 0.072124294 | 0.072124294 | -4.026385373 |
| 1456565_s_at | 0.137243879  | 4.671921739 | 2.025368551  | 0.072133604 | 0.072133604 | -4.026487239 |
| 1424340_at   | -0.499414242 | 7.413269317 | -2.025341162 | 0.072136841 | 0.072136841 | -4.026522656 |
| 1436598_at   | 0.35669244   | 4.99269304  | 2.025134672  | 0.07216125  | 0.07216125  | -4.026789657 |
| 1435460_at   | 0.24738621   | 7.518453534 | 2.025039247  | 0.072172533 | 0.072172533 | -4.026913043 |
| 1437682_x_at | -0.332116237 | 7.188443598 | -2.024995398 | 0.072177718 | 0.072177718 | -4.02696974  |
| 1422657_at   | 0.15170156   | 3.275863726 | 2.024890055  | 0.072190177 | 0.072190177 | -4.027105948 |
| 1424030_at   | 0.255013217  | 6.560952481 | 2.024568083  | 0.072228267 | 0.072228267 | -4.027522243 |
| 1459185_at   | 0.429289783  | 6.863239105 | 2.024470868  | 0.072239772 | 0.072239772 | -4.027647934 |
| 1442119_at   | 0.182194097  | 6.182723842 | 2.024370565  | 0.072251644 | 0.072251644 | -4.027777614 |
| 1425691_at   | -0.196827596 | 4.916341145 | -2.024153086 | 0.072277391 | 0.072277391 | -4.028058786 |

|              |              |             |              |             |             |              |
|--------------|--------------|-------------|--------------|-------------|-------------|--------------|
| 1436748_at   | 0.147899572  | 4.053218431 | 2.02399453   | 0.072296168 | 0.072296168 | -4.028263773 |
| 1429901_at   | 0.145880919  | 3.435994431 | 2.023712843  | 0.072329539 | 0.072329539 | -4.028627936 |
| 1457493_at   | 0.325216442  | 7.221684215 | 2.023698626  | 0.072331223 | 0.072331223 | -4.028646314 |
| 1454008_at   | -0.168929373 | 4.886744317 | -2.023657535 | 0.072336093 | 0.072336093 | -4.028699435 |
| 1434927_at   | -0.185155461 | 4.995955839 | -2.023347122 | 0.072372886 | 0.072372886 | -4.029100715 |
| 1416517_at   | -0.149083717 | 7.434351953 | -2.023171318 | 0.072393732 | 0.072393732 | -4.029327974 |
| 1416713_at   | -0.42793416  | 8.437489113 | -2.022831018 | 0.0724341   | 0.0724341   | -4.029767858 |
| 1457647_x_at | 0.170409837  | 3.838049201 | 2.02279531   | 0.072438337 | 0.072438337 | -4.029814013 |
| 1452604_at   | -0.153468923 | 6.567868901 | -2.022338172 | 0.072492601 | 0.072492601 | -4.030404889 |
| 1440481_at   | 0.213877546  | 4.468112891 | 2.022321509  | 0.07249458  | 0.07249458  | -4.030426426 |
| 1445645_at   | 0.146692261  | 3.324781415 | 2.022234351  | 0.072504931 | 0.072504931 | -4.030539078 |
| 1435241_at   | -0.205028669 | 9.692681425 | -2.022007486 | 0.072531879 | 0.072531879 | -4.030832294 |
| 1425506_at   | -0.126390148 | 8.854623775 | -2.021619828 | 0.07257795  | 0.07257795  | -4.031333309 |
| 1452901_at   | 0.140650301  | 10.11802066 | 2.021405885  | 0.072603387 | 0.072603387 | -4.0316098   |
| 1428199_at   | 0.150360256  | 6.953257864 | 2.020839035  | 0.072670827 | 0.072670827 | -4.032342332 |
| 1447661_at   | 0.134164087  | 3.563929406 | 2.020830158  | 0.072671883 | 0.072671883 | -4.032353803 |
| 1433177_at   | -0.211962426 | 4.440389165 | -2.020575626 | 0.072702185 | 0.072702185 | -4.032682712 |
| 1418178_at   | 0.575805575  | 6.726086879 | 2.020559213  | 0.072704139 | 0.072704139 | -4.032703921 |
| 1458505_at   | 0.570571124  | 5.546321847 | 2.020436041  | 0.072718808 | 0.072718808 | -4.032863079 |
| 1425560_a_at | 0.148523316  | 9.376662765 | 2.02032259   | 0.072732321 | 0.072732321 | -4.033009675 |
| 1439676_at   | 0.196817997  | 4.260301907 | 2.020115854  | 0.072756951 | 0.072756951 | -4.033276802 |
| 1435558_at   | -0.278510885 | 8.127806654 | -2.019468841 | 0.072834087 | 0.072834087 | -4.034112768 |
| 1429119_at   | 0.151762135  | 9.092843755 | 2.019398961  | 0.072842423 | 0.072842423 | -4.03420305  |
| 1457195_at   | -0.184319616 | 4.019974497 | -2.019391134 | 0.072843356 | 0.072843356 | -4.034213163 |
| 1451713_a_at | 0.188412072  | 4.062590159 | 2.019379776  | 0.072844711 | 0.072844711 | -4.034227837 |
| 1454226_at   | -0.18794397  | 4.472128244 | -2.019127415 | 0.072874823 | 0.072874823 | -4.034553872 |
| 1434625_at   | 0.226423364  | 7.774987384 | 2.019095925  | 0.072878581 | 0.072878581 | -4.034594554 |
| 1418705_at   | 0.139791669  | 3.483192565 | 2.019044826  | 0.07288468  | 0.07288468  | -4.03466057  |
| 1460601_at   | -0.183598278 | 5.043502703 | -2.018872959 | 0.072905196 | 0.072905196 | -4.034882601 |
| 1456555_at   | -0.655492672 | 8.950965576 | -2.018840492 | 0.072909072 | 0.072909072 | -4.034924544 |
| 1442829_at   | -0.183927501 | 5.300254701 | -2.018534026 | 0.072945672 | 0.072945672 | -4.035320446 |
| 1434415_at   | -0.202169611 | 8.752397187 | -2.018336408 | 0.072969281 | 0.072969281 | -4.035575726 |
| 1458470_at   | 0.286168273  | 6.706019893 | 2.01803828   | 0.073004913 | 0.073004913 | -4.03596083  |
| 1444532_at   | 0.156543792  | 5.767947274 | 2.018019063  | 0.07300721  | 0.07300721  | -4.035985653 |
| 1435674_at   | -0.145550743 | 6.827720396 | -2.01790345  | 0.073021033 | 0.073021033 | -4.03613499  |
| 1417481_at   | -0.285108318 | 8.453590995 | -2.017654192 | 0.073050842 | 0.073050842 | -4.036456946 |
| 1435580_at   | -0.128787467 | 8.4901671   | -2.017422431 | 0.07307857  | 0.07307857  | -4.036756293 |
| 1436365_at   | -0.241332351 | 6.474674209 | -2.017309953 | 0.07309203  | 0.07309203  | -4.036901569 |
| 1429435_x_at | -0.183580081 | 6.654268018 | -2.017297037 | 0.073093576 | 0.073093576 | -4.03691825  |
| 1457063_at   | 0.227885964  | 3.560589734 | 2.01690755   | 0.073140205 | 0.073140205 | -4.037421286 |
| 1456714_at   | -0.18740352  | 6.13476764  | -2.016850088 | 0.073147087 | 0.073147087 | -4.037495498 |
| 1458599_at   | 0.221252552  | 4.060799668 | 2.016019097  | 0.073246676 | 0.073246676 | -4.038568648 |
| 1446293_at   | 0.1525274    | 7.519085695 | 2.015639266  | 0.073292239 | 0.073292239 | -4.039059122 |
| 1460299_at   | -0.186796679 | 3.433633563 | -2.015595519 | 0.073297489 | 0.073297489 | -4.039115611 |
| 1437722_x_at | 0.148449372  | 5.369818516 | 2.015526391  | 0.073305785 | 0.073305785 | -4.039204873 |
| 1447590_at   | 0.213783663  | 3.679797962 | 2.015513921  | 0.073307281 | 0.073307281 | -4.039220973 |
| 1435562_at   | 0.140509852  | 6.782037075 | 2.015485993  | 0.073310633 | 0.073310633 | -4.039257036 |
| 1454749_at   | -0.147100649 | 7.229616302 | -2.015238424 | 0.073340352 | 0.073340352 | -4.039576699 |
| 1439656_at   | 0.125416424  | 6.038209015 | 2.014991275  | 0.073370032 | 0.073370032 | -4.039895809 |
| 1422144_at   | 0.14274389   | 4.10935466  | 2.014241012  | 0.073460202 | 0.073460202 | -4.040864449 |
| 1425890_at   | -0.13454992  | 3.998994693 | -2.014026753 | 0.073485972 | 0.073485972 | -4.041141053 |
| 1456578_x_at | -0.146069462 | 6.447672037 | -2.014002808 | 0.073488852 | 0.073488852 | -4.041171964 |
| 1422646_at   | 0.213143738  | 6.197831832 | 2.013965326  | 0.073493361 | 0.073493361 | -4.041220351 |

|              |              |             |              |             |             |              |
|--------------|--------------|-------------|--------------|-------------|-------------|--------------|
| 1439064_at   | -0.189912376 | 6.487243367 | -2.013940042 | 0.073496403 | 0.073496403 | -4.041252992 |
| 1430643_at   | 0.147847613  | 4.058528948 | 2.013139726  | 0.073592749 | 0.073592749 | -4.042286091 |
| 1428371_at   | -0.135087078 | 7.518331899 | -2.013117964 | 0.073595371 | 0.073595371 | -4.042314182 |
| 1436967_at   | -0.127604288 | 8.323809132 | -2.012878542 | 0.073624218 | 0.073624218 | -4.042623219 |
| 1421546_a_at | 0.137626668  | 8.815106563 | 2.012859643  | 0.073626496 | 0.073626496 | -4.042647612 |
| 1430102_at   | -0.181904694 | 3.879182388 | -2.012847159 | 0.073628    | 0.073628    | -4.042663726 |
| 1449038_at   | -0.144880624 | 5.407731884 | -2.012807008 | 0.073632839 | 0.073632839 | -4.042715549 |
| 1439440_x_at | 0.177895283  | 8.528376239 | 2.01276512   | 0.073637888 | 0.073637888 | -4.042769616 |
| 1426294_at   | -0.452166203 | 5.121142953 | -2.012721098 | 0.073643194 | 0.073643194 | -4.042826435 |
| 1416696_at   | -0.135434074 | 8.721700827 | -2.012703478 | 0.073645318 | 0.073645318 | -4.042849178 |
| 1445703_at   | -0.205052885 | 3.845374968 | -2.012633997 | 0.073653694 | 0.073653694 | -4.042938857 |
| 1419272_at   | 0.129638686  | 7.940014374 | 2.011775168  | 0.073757299 | 0.073757299 | -4.044047272 |
| 1435311_s_at | 0.309075305  | 5.383649993 | 2.011086264  | 0.073840506 | 0.073840506 | -4.044936279 |
| 1459597_at   | 0.257248943  | 4.483150711 | 2.011018056  | 0.073848749 | 0.073848749 | -4.045024294 |
| 1434981_at   | -0.165229742 | 7.487442218 | -2.010847426 | 0.073869374 | 0.073869374 | -4.04524447  |
| 1447677_x_at | -0.154386871 | 3.90551941  | -2.010733931 | 0.073883095 | 0.073883095 | -4.045390918 |
| 1460735_at   | 0.147734314  | 10.02648448 | 2.009720957  | 0.074005673 | 0.074005673 | -4.046697894 |
| 1420535_a_at | 0.166825691  | 6.936468549 | 2.009490403  | 0.074033598 | 0.074033598 | -4.046995336 |
| 1452008_at   | -0.262681306 | 6.171334383 | -2.009487307 | 0.074033973 | 0.074033973 | -4.046999331 |
| 1447036_at   | -0.196439411 | 3.971847545 | -2.00916654  | 0.074072843 | 0.074072843 | -4.047413141 |
| 1440791_x_at | -0.150016557 | 7.267193523 | -2.009020104 | 0.074090594 | 0.074090594 | -4.047602046 |
| 1453285_at   | 0.149777373  | 8.573574112 | 2.008791107  | 0.074118361 | 0.074118361 | -4.047897449 |
| 1437215_at   | 0.127962639  | 5.068601983 | 2.008033019  | 0.074210355 | 0.074210355 | -4.0488753   |
| 1448155_at   | 0.213845619  | 8.792661698 | 2.008020645  | 0.074211858 | 0.074211858 | -4.048891261 |
| 1429909_at   | -0.232431244 | 6.791648132 | -2.007678129 | 0.074253458 | 0.074253458 | -4.049333032 |
| 1460017_at   | 0.135067343  | 5.490763344 | 2.007612023  | 0.07426149  | 0.07426149  | -4.049418292 |
| 1428005_at   | 0.182257645  | 3.65864856  | 2.007586639  | 0.074264574 | 0.074264574 | -4.04945103  |
| 1420328_at   | 0.144661049  | 5.563252251 | 2.007525636  | 0.074271986 | 0.074271986 | -4.049529708 |
| 1421572_at   | -0.172888968 | 4.526589098 | -2.007029688 | 0.074332276 | 0.074332276 | -4.050169319 |
| 1445746_at   | -0.250173278 | 3.525020868 | -2.007013346 | 0.074334263 | 0.074334263 | -4.050190394 |
| 1446243_at   | 0.240504428  | 4.73715811  | 2.00693772   | 0.074343461 | 0.074343461 | -4.050287923 |
| 1458692_at   | 0.239055855  | 5.73252045  | 2.006462444  | 0.074401289 | 0.074401289 | -4.050900821 |
| 1419440_at   | -0.261481548 | 4.426845034 | -2.006216894 | 0.074431182 | 0.074431182 | -4.051217457 |
| 1447719_at   | -0.19148151  | 4.715328993 | -2.005868239 | 0.074473648 | 0.074473648 | -4.051667026 |
| 1447583_x_at | -0.141831876 | 5.205203104 | -2.00568367  | 0.074496137 | 0.074496137 | -4.051905006 |
| 1426154_s_at | -0.315907163 | 4.077656767 | -2.005480817 | 0.074520862 | 0.074520862 | -4.052166555 |
| 1448456_at   | 0.142199881  | 7.263837654 | 2.00547787   | 0.074521221 | 0.074521221 | -4.052170354 |
| 1433720_s_at | -0.223333663 | 7.575952847 | -2.005431567 | 0.074526866 | 0.074526866 | -4.052230054 |
| 1455434_a_at | 0.149836351  | 9.438423288 | 2.005403922  | 0.074530236 | 0.074530236 | -4.052265697 |
| 1432198_at   | -0.221755706 | 4.853658894 | -2.00523619  | 0.074550688 | 0.074550688 | -4.052481954 |
| 1418540_a_at | 0.207768275  | 7.503076721 | 2.005168556  | 0.074558937 | 0.074558937 | -4.052569153 |
| 1448312_at   | -0.197286742 | 4.218058258 | -2.004856147 | 0.074597048 | 0.074597048 | -4.052971922 |
| 1457261_at   | -0.181422792 | 3.272995342 | -2.004507478 | 0.074639605 | 0.074639605 | -4.053421418 |
| 1416280_at   | 0.119938185  | 11.17130419 | 2.004476489  | 0.074643389 | 0.074643389 | -4.053461368 |
| 1444855_at   | -0.247837153 | 7.364217685 | -2.004325936 | 0.074661772 | 0.074661772 | -4.053655449 |
| 1448988_at   | 0.149913005  | 3.425833407 | 2.004166396  | 0.074681258 | 0.074681258 | -4.05386111  |
| 1456903_at   | -0.214886131 | 5.754772641 | -2.004054777 | 0.074694894 | 0.074694894 | -4.054004994 |
| 1419460_at   | 0.143302415  | 7.70762794  | 2.003685185  | 0.074740062 | 0.074740062 | -4.054481406 |
| 1456873_at   | 0.183543584  | 4.255142984 | 2.003656221  | 0.074743602 | 0.074743602 | -4.054518741 |
| 1455082_at   | -0.11970212  | 8.966464382 | -2.003647928 | 0.074744616 | 0.074744616 | -4.054529429 |
| 1424379_at   | 0.2249867    | 6.686394724 | 2.00362069   | 0.074747946 | 0.074747946 | -4.054564539 |
| 1440666_at   | -0.159873014 | 3.399797884 | -2.00357866  | 0.074753085 | 0.074753085 | -4.054618714 |
| 1445402_at   | -0.22853079  | 4.716136845 | -2.003330519 | 0.074783429 | 0.074783429 | -4.054938552 |



|              |              |             |              |             |             |              |
|--------------|--------------|-------------|--------------|-------------|-------------|--------------|
| 1448197_at   | -0.141161361 | 3.235257098 | -2.002803628 | 0.074847901 | 0.074847901 | -4.055617644 |
| 1419554_at   | -0.159311819 | 10.06663513 | -2.002580474 | 0.074875222 | 0.074875222 | -4.055905243 |
| 1447300_at   | -0.208843399 | 7.573351875 | -2.002497713 | 0.074885357 | 0.074885357 | -4.056011903 |
| 1458563_at   | -0.174399991 | 4.840995616 | -2.002356178 | 0.074902693 | 0.074902693 | -4.056194304 |
| 1436853_a_at | 0.235079151  | 8.073045136 | 2.002058364  | 0.074939183 | 0.074939183 | -4.056578097 |
| 1431925_at   | -0.186617219 | 4.090916986 | -2.002021662 | 0.074943681 | 0.074943681 | -4.056625393 |
| 1456297_at   | -0.15506169  | 3.540887735 | -2.001763165 | 0.074975369 | 0.074975369 | -4.056958502 |
| 1455497_at   | 0.161968826  | 5.953714491 | 2.001723921  | 0.074980181 | 0.074980181 | -4.057009073 |
| 1443059_at   | -0.137646509 | 3.441267339 | -2.001627301 | 0.074992029 | 0.074992029 | -4.057133577 |
| 1437568_at   | -0.132065794 | 9.006229657 | -2.001507498 | 0.075006722 | 0.075006722 | -4.057287952 |
| 1438674_a_at | 0.154794794  | 8.441350905 | 2.001188105  | 0.075045908 | 0.075045908 | -4.0576995   |
| 1435427_x_at | 0.197165951  | 7.782917807 | 2.000901695  | 0.075081064 | 0.075081064 | -4.058068532 |
| 1440693_at   | -0.139827058 | 7.736548006 | -2.000771522 | 0.075097047 | 0.075097047 | -4.058236251 |
| 1419786_at   | 0.182582862  | 4.707424715 | 2.000769808  | 0.075097258 | 0.075097258 | -4.058238459 |
| 1427347_s_at | 0.208512383  | 9.96058972  | 2.000728562  | 0.075102323 | 0.075102323 | -4.058291601 |
| 1456361_at   | -0.280932441 | 4.873202243 | -2.000456096 | 0.075135791 | 0.075135791 | -4.058642643 |
| 1460174_at   | -0.164388043 | 7.605166801 | -2.000219695 | 0.07516484  | 0.07516484  | -4.058947206 |
| 1435543_at   | 0.183238686  | 8.561479065 | 2.000091163  | 0.075180639 | 0.075180639 | -4.059112795 |
| 1419280_at   | 0.169593474  | 5.603371271 | 2.00001016   | 0.075190597 | 0.075190597 | -4.059217149 |
| 1441376_at   | 0.152856138  | 4.913884748 | 1.999959206  | 0.075196862 | 0.075196862 | -4.059282792 |
| 1435708_at   | 0.2004756    | 5.275195077 | 1.999936449  | 0.07519966  | 0.07519966  | -4.059312109 |
| 1432490_a_at | -0.152109733 | 4.697315327 | -1.999854289 | 0.075209763 | 0.075209763 | -4.059417952 |
| 1428854_at   | -0.146381002 | 8.17590028  | -1.999697068 | 0.075229099 | 0.075229099 | -4.059620487 |
| 1428614_at   | -0.15678054  | 3.996287995 | -1.99966822  | 0.075232648 | 0.075232648 | -4.05965765  |
| 1418561_at   | 0.149131538  | 8.417286556 | 1.99951904   | 0.075251    | 0.075251    | -4.059849823 |
| 1457554_at   | -0.217175306 | 4.552661023 | -1.999516228 | 0.075251346 | 0.075251346 | -4.059853444 |
| 1452819_at   | -0.231457196 | 5.619029905 | -1.999441957 | 0.075260485 | 0.075260485 | -4.059949118 |
| 1434020_at   | 0.397957474  | 9.897856688 | 1.999395831  | 0.075266161 | 0.075266161 | -4.060008536 |
| 1458775_at   | -0.14684467  | 3.992979487 | -1.999175051 | 0.075293335 | 0.075293335 | -4.06029293  |
| 1421588_at   | -0.206964187 | 4.228506338 | -1.999153189 | 0.075296027 | 0.075296027 | -4.060321091 |
| 1444144_at   | -0.198099409 | 6.696847808 | -1.998903854 | 0.075326728 | 0.075326728 | -4.060642254 |
| 1433959_at   | 0.289862193  | 6.234573652 | 1.998716474  | 0.075349808 | 0.075349808 | -4.060883606 |
| 1440264_at   | 0.192964467  | 4.168963591 | 1.998388683  | 0.075390199 | 0.075390199 | -4.061305799 |
| 1455738_at   | 0.143845528  | 7.648024025 | 1.998356665  | 0.075394145 | 0.075394145 | -4.061347036 |
| 1455224_at   | 0.273937216  | 8.855922492 | 1.998244644  | 0.075407954 | 0.075407954 | -4.061491313 |
| 1419622_at   | -0.141711723 | 3.13766413  | -1.997906727 | 0.075449624 | 0.075449624 | -4.061926514 |
| 1456443_at   | -0.162048596 | 5.844394858 | -1.997857225 | 0.07545573  | 0.07545573  | -4.061990266 |
| 1458743_at   | 0.123373229  | 3.380406344 | 1.997850818  | 0.07545652  | 0.07545652  | -4.061998516 |
| 1438979_s_at | 0.255705578  | 4.560607395 | 1.997346733  | 0.075518727 | 0.075518727 | -4.062647679 |
| 1444794_at   | -0.153916555 | 4.785376395 | -1.99733416  | 0.075520279 | 0.075520279 | -4.06266387  |
| 1426753_at   | -0.184017479 | 5.187493004 | -1.997086844 | 0.075550818 | 0.075550818 | -4.062982346 |
| 1449971_a_at | -0.198265008 | 5.598840773 | -1.99704106  | 0.075556472 | 0.075556472 | -4.063041302 |
| 1459888_at   | 0.187854645  | 6.51647412  | 1.996580133  | 0.075613423 | 0.075613423 | -4.063634813 |
| 1432062_at   | -0.17770091  | 5.424469865 | -1.996506666 | 0.075622504 | 0.075622504 | -4.06372941  |
| 1427573_at   | 0.19108092   | 6.234337964 | 1.996256847  | 0.075653391 | 0.075653391 | -4.064051067 |
| 1432597_at   | -0.160799692 | 4.142997955 | -1.996248862 | 0.075654378 | 0.075654378 | -4.064061349 |
| 1457915_at   | -0.149935115 | 4.430498123 | -1.996176647 | 0.075663309 | 0.075663309 | -4.064154329 |
| 1458951_at   | 0.196561929  | 7.039596766 | 1.99584484   | 0.075704357 | 0.075704357 | -4.064581527 |
| 1452620_at   | -0.185633311 | 5.798723615 | -1.995090356 | 0.075797772 | 0.075797772 | -4.065552839 |
| 1423611_at   | -0.237323474 | 9.962640458 | -1.994852937 | 0.075827191 | 0.075827191 | -4.065858466 |
| 1419169_at   | -0.137596187 | 9.255707152 | -1.994827697 | 0.075830319 | 0.075830319 | -4.065890957 |
| 1447190_at   | -0.152333233 | 6.234509385 | -1.994724594 | 0.075843098 | 0.075843098 | -4.066023676 |
| 1431625_at   | -0.147417206 | 3.261163069 | -1.994427208 | 0.075879969 | 0.075879969 | -4.066406474 |

|                    |              |             |              |             |             |              |
|--------------------|--------------|-------------|--------------|-------------|-------------|--------------|
| 1446773_at         | -0.154353657 | 4.394696687 | -1.994013155 | 0.075931334 | 0.075931334 | -4.066939419 |
| 1458161_at         | -0.166915362 | 8.643775964 | -1.993749104 | 0.075964108 | 0.075964108 | -4.067279272 |
| 1449590_a_at       | -0.146109975 | 6.438279012 | -1.993733362 | 0.075966603 | 0.075966603 | -4.067299201 |
| 1442642_at         | -0.171052588 | 4.367375129 | -1.993704943 | 0.07596959  | 0.07596959  | -4.067336109 |
| 1459769_at         | -0.149681654 | 3.941401867 | -1.993563417 | 0.075987163 | 0.075987163 | -4.067518257 |
| 1431956_at         | -0.140255206 | 4.318548892 | -1.993345372 | 0.076014244 | 0.076014244 | -4.067798879 |
| 1418059_at         | 0.193016025  | 5.760686703 | 1.993270335  | 0.076023566 | 0.076023566 | -4.067895449 |
| AFFX-TransRecMur/) | 0.1360397    | 6.269899669 | 1.993222745  | 0.076029479 | 0.076029479 | -4.067956695 |
| 1450760_a_at       | 0.507278687  | 6.790744951 | 1.992579806  | 0.076109401 | 0.076109401 | -4.068784081 |
| 1432932_at         | -0.133930686 | 3.426597081 | -1.992530584 | 0.076115522 | 0.076115522 | -4.06884742  |
| 1454481_at         | -0.13902788  | 3.906678071 | -1.992055359 | 0.076174652 | 0.076174652 | -4.069458922 |
| 1460349_at         | 0.170317676  | 8.386045913 | 1.991982187  | 0.07618376  | 0.07618376  | -4.069553072 |
| 1435994_at         | 0.333087505  | 5.634432006 | 1.991741621  | 0.076213713 | 0.076213713 | -4.069862603 |
| 1436786_at         | -0.46551693  | 7.713593952 | -1.991504811 | 0.076243208 | 0.076243208 | -4.070167289 |
| 1426226_at         | -0.165637075 | 7.929864656 | -1.990579507 | 0.076358562 | 0.076358562 | -4.071357706 |
| 1429596_at         | -0.194125    | 5.914958079 | -1.990448061 | 0.076374963 | 0.076374963 | -4.071526801 |
| 1435909_at         | 0.249203672  | 5.305808871 | 1.98963877   | 0.07647601  | 0.07647601  | -4.072567805 |
| 1425352_at         | -0.152546459 | 6.311141591 | -1.989603489 | 0.076480418 | 0.076480418 | -4.072613184 |
| 1439302_at         | 0.285214347  | 5.245567347 | 1.989254401  | 0.076524046 | 0.076524046 | -4.073062179 |
| 1415730_at         | 0.124310388  | 10.0175721  | 1.989156796  | 0.076536249 | 0.076536249 | -4.073187713 |
| 1435098_at         | 0.190342753  | 6.699780255 | 1.988813035  | 0.076579241 | 0.076579241 | -4.073629827 |
| 1437251_at         | 0.140505122  | 8.213304974 | 1.988764249  | 0.076585344 | 0.076585344 | -4.073692569 |
| 1456925_at         | -0.168664908 | 4.782099861 | -1.988257877 | 0.076648719 | 0.076648719 | -4.074343769 |
| 1459004_at         | -0.162370379 | 5.220188716 | -1.9880336   | 0.076676805 | 0.076676805 | -4.074632176 |
| 1460090_at         | -0.168400633 | 3.679369172 | -1.987946644 | 0.076687697 | 0.076687697 | -4.074743993 |
| 1423726_at         | -0.249046768 | 6.614989912 | -1.987909975 | 0.07669229  | 0.07669229  | -4.074791146 |
| 1437209_at         | -0.190288268 | 7.734007903 | -1.987902687 | 0.076693203 | 0.076693203 | -4.074800517 |
| 1418424_at         | 0.224707154  | 7.766486723 | 1.987701934  | 0.076718356 | 0.076718356 | -4.07505866  |
| 1420923_at         | 0.190698381  | 4.029991791 | 1.98748115   | 0.076746028 | 0.076746028 | -4.075342551 |
| 1449155_at         | 0.139802081  | 6.589102285 | 1.987280976  | 0.076771125 | 0.076771125 | -4.075599931 |
| 1422540_at         | -0.197526071 | 7.922802266 | -1.986380689 | 0.076884095 | 0.076884095 | -4.076757411 |
| 1421383_at         | 0.174516533  | 4.720580235 | 1.986123156  | 0.076916439 | 0.076916439 | -4.077088485 |
| 1425974_a_at       | 0.14251655   | 8.419121415 | 1.985890766  | 0.076945637 | 0.076945637 | -4.077387225 |
| 1453860_s_at       | 0.213892422  | 5.939282318 | 1.985872398  | 0.076947945 | 0.076947945 | -4.077410836 |
| 1425523_at         | 0.202936109  | 10.14861261 | 1.98548787   | 0.076996283 | 0.076996283 | -4.077905127 |
| 1449399_a_at       | 0.141437248  | 5.482319052 | 1.985178671  | 0.077035172 | 0.077035172 | -4.078302565 |
| 1459540_at         | -0.170274035 | 4.856116872 | -1.984870965 | 0.077073891 | 0.077073891 | -4.078698064 |
| 1437304_at         | -0.144812037 | 7.351421657 | -1.984860714 | 0.077075181 | 0.077075181 | -4.07871124  |
| 1454577_at         | -0.253740154 | 4.573811745 | -1.984086075 | 0.07717274  | 0.07717274  | -4.07970681  |
| 1419511_at         | 0.164121108  | 3.793321133 | 1.983643629  | 0.077228514 | 0.077228514 | -4.080275391 |
| 1430177_at         | 0.244913099  | 6.170362679 | 1.983456134  | 0.077252161 | 0.077252161 | -4.080516325 |
| AFFX-18SRNAMur/X   | 0.482755259  | 7.900643315 | 1.983350079  | 0.07726554  | 0.07726554  | -4.080652605 |
| 1437609_at         | -0.191863757 | 3.790101369 | -1.983349946 | 0.077265557 | 0.077265557 | -4.080652775 |
| 1428923_at         | -0.119788662 | 4.386172044 | -1.983302937 | 0.077271488 | 0.077271488 | -4.080713181 |
| 1437254_at         | -0.154983002 | 6.876053119 | -1.982939295 | 0.077317381 | 0.077317381 | -4.081180438 |
| 1420167_at         | -0.202884782 | 3.817796739 | -1.982276488 | 0.077401096 | 0.077401096 | -4.082032033 |
| 1440283_at         | -0.168969778 | 3.667256274 | -1.982040683 | 0.0774309   | 0.0774309   | -4.082334981 |
| 1439811_at         | 0.18215826   | 6.942959505 | 1.981887928  | 0.077450213 | 0.077450213 | -4.082531225 |
| 1424951_at         | -0.153953955 | 6.890982404 | -1.981308697 | 0.077523487 | 0.077523487 | -4.083275322 |
| 1423192_at         | 0.163264882  | 9.151349306 | 1.981207298  | 0.077536321 | 0.077536321 | -4.083405574 |
| 1428345_at         | 0.160055974  | 5.6323328   | 1.981140462  | 0.077544781 | 0.077544781 | -4.083491428 |
| 1457885_at         | 0.170494989  | 4.594645228 | 1.980957894  | 0.077567896 | 0.077567896 | -4.08372594  |
| 1427976_at         | -0.133006532 | 3.161026631 | -1.980912525 | 0.077573641 | 0.077573641 | -4.083784216 |

|                |              |             |              |             |             |              |
|----------------|--------------|-------------|--------------|-------------|-------------|--------------|
| 1422127_at     | -0.162245646 | 4.672034588 | -1.980865075 | 0.07757965  | 0.07757965  | -4.083845164 |
| 1439690_at     | 0.164927381  | 5.233183769 | 1.980721598  | 0.077597823 | 0.077597823 | -4.084029456 |
| 1452025_a_at   | 0.207949355  | 4.922058963 | 1.980686234  | 0.077602303 | 0.077602303 | -4.084074879 |
| 1451339_at     | 0.136954792  | 7.64377988  | 1.980576803  | 0.077616167 | 0.077616167 | -4.084215436 |
| 1436377_at     | -0.18147293  | 7.734598467 | -1.980531679 | 0.077621884 | 0.077621884 | -4.084273394 |
| 1456958_at     | -0.268520281 | 5.093246356 | -1.980528403 | 0.077622299 | 0.077622299 | -4.084277602 |
| 1423194_at     | 0.251623804  | 8.67836861  | 1.980435662  | 0.077634052 | 0.077634052 | -4.084396718 |
| 1429663_at     | -0.328166244 | 5.004583399 | -1.980219173 | 0.077661492 | 0.077661492 | -4.08467477  |
| 1426767_at     | -0.159352309 | 8.352623454 | -1.9799705   | 0.077693023 | 0.077693023 | -4.084994147 |
| 1427762_x_at   | -0.14612331  | 4.367234484 | -1.979898633 | 0.077702137 | 0.077702137 | -4.085086446 |
| 1439996_at     | 0.122793402  | 4.904622118 | 1.979790852  | 0.077715809 | 0.077715809 | -4.085224865 |
| 1427411_s_at   | -0.227634892 | 7.041079132 | -1.979355027 | 0.077771115 | 0.077771115 | -4.08578456  |
| 1442592_at     | -0.174090343 | 5.217287446 | -1.979315115 | 0.077776181 | 0.077776181 | -4.085835814 |
| 1430783_at     | -0.16256034  | 3.761631316 | -1.979224147 | 0.07778773  | 0.07778773  | -4.085952631 |
| 1425875_a_at   | -0.197189916 | 6.775397897 | -1.978764125 | 0.077846159 | 0.077846159 | -4.086543346 |
| 1449209_a_at   | 0.129546763  | 7.982600757 | 1.978520786  | 0.077877083 | 0.077877083 | -4.0868558   |
| 1442355_at     | -0.145383642 | 5.79766707  | -1.978131437 | 0.077926586 | 0.077926586 | -4.08735571  |
| 1445041_at     | 0.310249141  | 4.653086291 | 1.978011484  | 0.077941843 | 0.077941843 | -4.087509719 |
| 1445620_at     | -0.254935306 | 4.25148638  | -1.977876196 | 0.077959054 | 0.077959054 | -4.087683414 |
| 1426169_a_at   | -0.158426192 | 4.307767032 | -1.977726567 | 0.077978094 | 0.077978094 | -4.087875517 |
| 1436868_at     | 0.162658235  | 6.059917475 | 1.977420726  | 0.078017025 | 0.078017025 | -4.08826816  |
| 1460186_at     | -0.130210834 | 10.74628694 | -1.977019972 | 0.078068065 | 0.078068065 | -4.088782624 |
| 1451673_at     | -0.211471563 | 4.268934819 | -1.976987258 | 0.078072233 | 0.078072233 | -4.088824619 |
| 1430241_at     | -0.191071882 | 6.426018997 | -1.976731189 | 0.078104865 | 0.078104865 | -4.089153326 |
| 1456710_at     | 0.223150042  | 3.912417997 | 1.976573728  | 0.078124937 | 0.078124937 | -4.089355447 |
| 1457402_at     | 0.186269038  | 7.497161659 | 1.976077053  | 0.078188281 | 0.078188281 | -4.089992959 |
| AFFX-BioB-3_at | 0.15095071   | 7.738060615 | 1.976010066  | 0.078196828 | 0.078196828 | -4.090078937 |
| 1455085_at     | -0.215013866 | 4.238367968 | -1.976006089 | 0.078197336 | 0.078197336 | -4.090084041 |
| 1432680_at     | -0.251636766 | 4.688817907 | -1.975907927 | 0.078209862 | 0.078209862 | -4.09021003  |
| 1439887_at     | 0.22695125   | 6.134050846 | 1.975808703  | 0.078222526 | 0.078222526 | -4.090337381 |
| 1439749_at     | -0.154193997 | 7.971811603 | -1.975784326 | 0.078225637 | 0.078225637 | -4.090368666 |
| 1444682_at     | -0.158255528 | 5.334744242 | -1.975748347 | 0.07823023  | 0.07823023  | -4.090414845 |
| 1440229_at     | -0.418278515 | 6.336072614 | -1.975177149 | 0.078303176 | 0.078303176 | -4.091147909 |
| 1432072_at     | -0.262433768 | 5.056258061 | -1.974458686 | 0.078395021 | 0.078395021 | -4.092069878 |
| 1432782_at     | -0.179694142 | 4.705248123 | -1.974330723 | 0.078411389 | 0.078411389 | -4.092234075 |
| 1450453_a_at   | -0.164843808 | 5.663062038 | -1.974199773 | 0.078428144 | 0.078428144 | -4.092402102 |
| 1427506_at     | 0.152028834  | 7.102734482 | 1.973676882  | 0.078495078 | 0.078495078 | -4.093073009 |
| 1438540_at     | 0.270339186  | 9.595080023 | 1.973315452  | 0.078541376 | 0.078541376 | -4.093536716 |
| 1436107_at     | -0.239635087 | 6.089916424 | -1.9731445   | 0.078563283 | 0.078563283 | -4.093756035 |
| 1446488_at     | -0.210779209 | 3.984211767 | -1.97309324  | 0.078569853 | 0.078569853 | -4.093821796 |
| 1428960_at     | -0.674688846 | 6.717570715 | -1.97282107  | 0.078604746 | 0.078604746 | -4.094170955 |
| 1430807_at     | -0.137764951 | 4.365003032 | -1.972632622 | 0.078628914 | 0.078628914 | -4.0944127   |
| 1420302_at     | 0.134925609  | 3.961109444 | 1.972366476  | 0.078663058 | 0.078663058 | -4.094754106 |
| 1437667_a_at   | 0.329970444  | 8.138738232 | 1.972296883  | 0.078671989 | 0.078671989 | -4.094843375 |
| 1420562_at     | -0.153706489 | 6.24582398  | -1.972124424 | 0.078694124 | 0.078694124 | -4.095064591 |
| 1432780_at     | -0.207004895 | 5.157696196 | -1.972078677 | 0.078699997 | 0.078699997 | -4.09512327  |
| 1418847_at     | 0.193936735  | 4.279255138 | 1.971755913  | 0.078741442 | 0.078741442 | -4.095537266 |
| 1435861_at     | 0.178489494  | 7.172234354 | 1.971752244  | 0.078741913 | 0.078741913 | -4.095541972 |
| 1441418_at     | -0.131688312 | 3.650718395 | -1.971615954 | 0.07875942  | 0.07875942  | -4.095716778 |
| 1415989_at     | -0.233609983 | 8.476600484 | -1.971537402 | 0.078769513 | 0.078769513 | -4.095817529 |
| 1418858_at     | 0.138888656  | 5.403399877 | 1.971390985  | 0.078788327 | 0.078788327 | -4.096005317 |
| 1433141_at     | -0.130697328 | 3.472253894 | -1.971022619 | 0.07883568  | 0.07883568  | -4.096477751 |
| 1433652_at     | -0.167986684 | 4.684632472 | -1.970811836 | 0.078862788 | 0.078862788 | -4.096748068 |

|              |              |             |              |             |             |              |
|--------------|--------------|-------------|--------------|-------------|-------------|--------------|
| 1450216_at   | 0.189008577  | 4.033832738 | 1.970722932  | 0.078874224 | 0.078874224 | -4.096862082 |
| 1425555_at   | 0.178191451  | 4.461294779 | 1.970457035  | 0.078908438 | 0.078908438 | -4.097203063 |
| 1450310_at   | -0.22238741  | 4.794221959 | -1.970358901 | 0.078921068 | 0.078921068 | -4.097328904 |
| 1452885_at   | 0.354878761  | 9.649626471 | 1.970162144  | 0.078946398 | 0.078946398 | -4.097581209 |
| 1443045_at   | 0.365124785  | 5.473767238 | 1.969938906  | 0.078975147 | 0.078975147 | -4.097867461 |
| 1435836_at   | -0.12928038  | 8.851283898 | -1.969906524 | 0.078979317 | 0.078979317 | -4.097908982 |
| 1422472_at   | 0.262585489  | 4.585852464 | 1.96984992   | 0.078986609 | 0.078986609 | -4.097981562 |
| 1435831_at   | -0.331932652 | 7.631642196 | -1.96979315  | 0.078993922 | 0.078993922 | -4.098054354 |
| 1425710_a_at | -0.225451408 | 5.144985056 | -1.969774385 | 0.07899634  | 0.07899634  | -4.098078415 |
| 1440877_at   | -0.167873714 | 5.897376692 | -1.969761999 | 0.078997935 | 0.078997935 | -4.098094296 |
| 1423909_at   | -0.131061885 | 9.106522949 | -1.969690041 | 0.079007207 | 0.079007207 | -4.098186562 |
| 1453259_at   | -0.198183658 | 7.782194952 | -1.969453069 | 0.079037746 | 0.079037746 | -4.0984904   |
| 1417350_at   | 0.193867772  | 7.357501534 | 1.969404147  | 0.079044052 | 0.079044052 | -4.098553125 |
| 1459407_at   | 0.151915738  | 3.359288128 | 1.969294108  | 0.079058238 | 0.079058238 | -4.098694209 |
| 1452892_at   | -0.44477354  | 4.417445523 | -1.969245953 | 0.079064447 | 0.079064447 | -4.098755949 |
| 1458703_at   | -0.273628929 | 5.344355558 | -1.96923742  | 0.079065547 | 0.079065547 | -4.098766889 |
| 1422286_a_at | 0.144318381  | 8.939287075 | 1.969155492  | 0.079076112 | 0.079076112 | -4.098871929 |
| 1434430_s_at | 0.194001924  | 3.339007458 | 1.969022998  | 0.0790932   | 0.0790932   | -4.099041796 |
| 1442759_at   | -0.219390907 | 4.883678459 | -1.968961273 | 0.079101161 | 0.079101161 | -4.09912093  |
| 1451757_at   | -0.183477242 | 3.666676797 | -1.968660865 | 0.079139922 | 0.079139922 | -4.099506059 |
| 1434458_at   | 0.170374173  | 8.732135652 | 1.968581854  | 0.079150119 | 0.079150119 | -4.099607348 |
| 1458742_at   | -0.291745991 | 6.232286975 | -1.968507735 | 0.079159686 | 0.079159686 | -4.099702366 |
| 1423444_at   | 0.188698017  | 9.830360959 | 1.968386477  | 0.07917534  | 0.07917534  | -4.099857812 |
| 1443052_at   | -0.19272081  | 4.405809154 | -1.968325131 | 0.079183261 | 0.079183261 | -4.099936452 |
| 1444227_at   | -0.130769179 | 3.017164632 | -1.968060026 | 0.079217499 | 0.079217499 | -4.100276286 |
| 1441202_at   | -0.15514666  | 3.410011091 | -1.968026128 | 0.079221878 | 0.079221878 | -4.100319739 |
| 1456691_s_at | 0.20309314   | 6.143288647 | 1.967564299  | 0.079281559 | 0.079281559 | -4.100911714 |
| 1417597_at   | 0.157403854  | 3.514763745 | 1.967479347  | 0.079292541 | 0.079292541 | -4.101020601 |
| 1459979_x_at | 0.181750317  | 3.610217812 | 1.967026388  | 0.079351125 | 0.079351125 | -4.101601155 |
| 1446682_at   | 0.457740304  | 6.040605123 | 1.966975215  | 0.079357746 | 0.079357746 | -4.101666741 |
| 1437244_at   | 0.194746893  | 8.278114337 | 1.966791726  | 0.079381491 | 0.079381491 | -4.101901903 |
| 1437600_at   | 0.153377928  | 6.701443704 | 1.966572111  | 0.07940992  | 0.07940992  | -4.102183356 |
| 1436829_at   | 0.22237515   | 3.901754934 | 1.96645106   | 0.079425595 | 0.079425595 | -4.102338488 |
| 1431116_at   | 0.191164317  | 5.273861395 | 1.966275808  | 0.079448292 | 0.079448292 | -4.102563074 |
| 1428325_at   | -0.140833683 | 9.765710529 | -1.966196256 | 0.079458597 | 0.079458597 | -4.102665018 |
| 1432331_a_at | 0.126100924  | 9.971069177 | 1.965875999  | 0.079500095 | 0.079500095 | -4.103075408 |
| 1425839_at   | -0.209287222 | 4.692411811 | -1.965851325 | 0.079503293 | 0.079503293 | -4.103107025 |
| 1422474_at   | 0.29855873   | 6.972130806 | 1.965843512  | 0.079504306 | 0.079504306 | -4.103117037 |
| 1444851_at   | 0.146039528  | 6.927578958 | 1.965585921  | 0.079537701 | 0.079537701 | -4.103447108 |
| 1436093_at   | 0.159081661  | 6.689910727 | 1.965584825  | 0.079537843 | 0.079537843 | -4.103448512 |
| 1431885_a_at | 0.175512753  | 6.126912633 | 1.965486526  | 0.07955059  | 0.07955059  | -4.103574466 |
| 1417888_at   | 0.160654178  | 7.693189193 | 1.965346785  | 0.079568715 | 0.079568715 | -4.103753518 |
| 1452607_at   | -0.183567328 | 8.442719031 | -1.965291824 | 0.079575845 | 0.079575845 | -4.103823938 |
| 1416069_at   | 0.328584443  | 7.055968113 | 1.965135755  | 0.079596093 | 0.079596093 | -4.104023905 |
| 1453151_at   | -0.119468567 | 3.71072574  | -1.964907548 | 0.079625711 | 0.079625711 | -4.104316291 |
| 1425635_at   | 0.186478059  | 5.563466742 | 1.964497458  | 0.079678959 | 0.079678959 | -4.104841682 |
| 1429091_at   | -0.157650151 | 6.076630866 | -1.964380234 | 0.079694186 | 0.079694186 | -4.104991858 |
| 1443657_at   | -0.147103185 | 3.915012458 | -1.964314799 | 0.079702687 | 0.079702687 | -4.105075687 |
| 1450825_at   | -0.166636531 | 4.120043479 | -1.964296782 | 0.079705028 | 0.079705028 | -4.105098767 |
| 1438929_at   | 0.303015727  | 7.270897881 | 1.963736014  | 0.079777918 | 0.079777918 | -4.105817122 |
| 1448935_at   | -0.150462874 | 6.724330489 | -1.963699224 | 0.079782702 | 0.079782702 | -4.105864249 |
| 1422513_at   | 0.146026926  | 7.777297746 | 1.963563366  | 0.079800371 | 0.079800371 | -4.106038274 |
| 1460416_s_at | 0.161618249  | 3.884731257 | 1.963515453  | 0.079806604 | 0.079806604 | -4.106099646 |

|              |              |             |              |             |             |              |
|--------------|--------------|-------------|--------------|-------------|-------------|--------------|
| 1459907_a_at | 0.154600104  | 6.129099249 | 1.963210478  | 0.079846285 | 0.079846285 | -4.106490284 |
| 1458551_at   | -0.134753702 | 6.82349916  | -1.96319375  | 0.079848462 | 0.079848462 | -4.106511711 |
| 1416515_at   | -0.230341562 | 7.545449013 | -1.963180863 | 0.07985014  | 0.07985014  | -4.106528217 |
| 1425016_at   | 0.229696836  | 8.372673574 | 1.963089389  | 0.079862046 | 0.079862046 | -4.106645379 |
| 1452514_a_at | -0.206038788 | 7.243542394 | -1.962903096 | 0.079886299 | 0.079886299 | -4.106883984 |
| 1425219_x_at | -0.137703276 | 3.665469361 | -1.962811633 | 0.079898208 | 0.079898208 | -4.107001128 |
| 1448279_at   | 0.147511941  | 10.43877759 | 1.962461775  | 0.079943781 | 0.079943781 | -4.107449202 |
| 1438543_at   | 0.134420448  | 4.509119473 | 1.962454842  | 0.079944684 | 0.079944684 | -4.107458082 |
| 1447694_x_at | -0.152738597 | 5.786276767 | -1.962331624 | 0.07996074  | 0.07996074  | -4.107615883 |
| 1429549_at   | -0.218207047 | 8.361961842 | -1.962199968 | 0.079977899 | 0.079977899 | -4.107784489 |
| 1454510_at   | 0.169306358  | 4.986504715 | 1.962033659  | 0.07999958  | 0.07999958  | -4.107997468 |
| 1443097_at   | 0.173764511  | 5.21577101  | 1.962029589  | 0.080000111 | 0.080000111 | -4.10800268  |
| 1418434_at   | 0.134843144  | 8.148835685 | 1.961948553  | 0.080010677 | 0.080010677 | -4.108106454 |
| 1432319_at   | -0.167353552 | 4.212776136 | -1.961818171 | 0.08002768  | 0.08002768  | -4.108273418 |
| 1440386_at   | 0.176370206  | 4.423073125 | 1.961577474  | 0.080059078 | 0.080059078 | -4.108581639 |
| 1432831_at   | -0.126277874 | 5.665414895 | -1.961420887 | 0.080079511 | 0.080079511 | -4.108782148 |
| 1423119_at   | -0.262805401 | 10.00218948 | -1.961301894 | 0.080095041 | 0.080095041 | -4.108934513 |
| 1420301_at   | -0.192450471 | 3.635257667 | -1.961107992 | 0.080120354 | 0.080120354 | -4.109182792 |
| 1426873_s_at | 0.166729576  | 7.882390624 | 1.96110296   | 0.080121011 | 0.080121011 | -4.109189234 |
| 1456307_s_at | 0.188769177  | 7.567851108 | 1.961070701  | 0.080125223 | 0.080125223 | -4.109230538 |
| 1434243_s_at | 0.134592109  | 7.717662297 | 1.960794865  | 0.080161248 | 0.080161248 | -4.109583712 |
| 1431666_at   | -0.140867392 | 3.434344486 | -1.960742932 | 0.080168032 | 0.080168032 | -4.109650204 |
| 1442626_at   | -0.239284586 | 6.381527624 | -1.96019703  | 0.080239379 | 0.080239379 | -4.110349109 |
| 1441862_at   | -0.228832092 | 4.743592906 | -1.960023525 | 0.080262067 | 0.080262067 | -4.11057123  |
| 1433169_at   | 0.274608206  | 6.499049547 | 1.959809062  | 0.08029012  | 0.08029012  | -4.110845777 |
| 1457544_at   | -0.175248633 | 3.837602889 | -1.959404988 | 0.080343001 | 0.080343001 | -4.111363029 |
| 1424105_a_at | 0.156729146  | 9.565284547 | 1.959367202  | 0.080347947 | 0.080347947 | -4.111411397 |
| 1420046_s_at | 0.126987823  | 9.258108896 | 1.95934359   | 0.080351038 | 0.080351038 | -4.111441621 |
| 1422238_at   | -0.125193136 | 3.728974764 | -1.959243142 | 0.08036419  | 0.08036419  | -4.111570197 |
| 1429106_at   | -0.522338862 | 6.783779839 | -1.959241265 | 0.080364436 | 0.080364436 | -4.1115726   |
| 1439070_x_at | -0.196666224 | 7.858768511 | -1.959187838 | 0.080371432 | 0.080371432 | -4.111640987 |
| 1453110_at   | 0.131712721  | 7.014787356 | 1.958898172  | 0.080409373 | 0.080409373 | -4.112011752 |
| 1445006_at   | 0.150902236  | 3.355999287 | 1.958586683  | 0.080450191 | 0.080450191 | -4.112410431 |
| 1416772_at   | -0.147543987 | 8.619022525 | -1.957989195 | 0.080528543 | 0.080528543 | -4.113175106 |
| 1457319_at   | -0.127516211 | 3.62392177  | -1.957940672 | 0.080534909 | 0.080534909 | -4.113237203 |
| 1452767_at   | -0.190708711 | 10.86172681 | -1.957151359 | 0.080638533 | 0.080638533 | -4.114247254 |
| 1436186_at   | -0.167539036 | 7.912616657 | -1.956638408 | 0.080705942 | 0.080705942 | -4.114903586 |
| 1416008_at   | 0.177898046  | 7.959926189 | 1.956520672  | 0.080721422 | 0.080721422 | -4.115054224 |
| 1432871_at   | -0.22761405  | 4.716375715 | -1.956227    | 0.080760046 | 0.080760046 | -4.115429951 |
| 1450185_a_at | 0.330058987  | 4.577354976 | 1.95601633   | 0.080787764 | 0.080787764 | -4.115699473 |
| 1421307_at   | -0.194739329 | 6.171774278 | -1.955764763 | 0.080820875 | 0.080820875 | -4.116021306 |
| 1441513_at   | -0.160852411 | 5.410104835 | -1.955666626 | 0.080833796 | 0.080833796 | -4.11614685  |
| 1421415_s_at | 0.200409895  | 5.253076198 | 1.95563022   | 0.080838589 | 0.080838589 | -4.116193422 |
| 1416625_at   | 0.198602591  | 8.107631441 | 1.955435913  | 0.080864177 | 0.080864177 | -4.116441986 |
| 1456910_at   | -0.20779223  | 5.093212311 | -1.955296351 | 0.080882561 | 0.080882561 | -4.116620513 |
| 1438186_at   | 0.250626083  | 5.226437794 | 1.954867322  | 0.0809391   | 0.0809391   | -4.1171693   |
| 1458718_at   | -0.184566281 | 4.196025653 | -1.954585378 | 0.080976275 | 0.080976275 | -4.117529924 |
| 1438780_at   | -0.147762922 | 6.081116881 | -1.954384572 | 0.081002762 | 0.081002762 | -4.117786756 |
| 1436343_at   | 0.437163083  | 8.00189802  | 1.954181612  | 0.081029542 | 0.081029542 | -4.118046335 |
| 1420984_at   | -0.192919239 | 5.351120039 | -1.953798995 | 0.081080049 | 0.081080049 | -4.118535665 |
| 1446938_at   | -0.253040819 | 6.154371685 | -1.953781037 | 0.08108242  | 0.08108242  | -4.118558632 |
| 1437259_at   | 0.263753072  | 5.523492344 | 1.953695092  | 0.081093769 | 0.081093769 | -4.118668542 |
| 1417528_at   | -0.341079143 | 6.265426358 | -1.953470588 | 0.081123423 | 0.081123423 | -4.118955642 |

|              |              |             |              |             |             |              |
|--------------|--------------|-------------|--------------|-------------|-------------|--------------|
| 1416805_at   | 0.193941254  | 7.324125154 | 1.953137595  | 0.081167426 | 0.081167426 | -4.11938146  |
| 1417384_at   | -0.156872899 | 7.813953432 | -1.952994309 | 0.081186367 | 0.081186367 | -4.119564681 |
| 1447202_at   | -0.28321025  | 6.66341913  | -1.952989585 | 0.081186992 | 0.081186992 | -4.119570721 |
| 1447383_at   | -0.14984737  | 3.788331467 | -1.952943554 | 0.081193078 | 0.081193078 | -4.11962958  |
| 1457217_at   | -0.133553509 | 4.515450923 | -1.952732462 | 0.081220992 | 0.081220992 | -4.119899495 |
| 1453964_at   | -0.158142851 | 5.04617506  | -1.95268098  | 0.081227801 | 0.081227801 | -4.119965321 |
| 1455524_at   | 0.176393716  | 7.711196107 | 1.952614462  | 0.0812366   | 0.0812366   | -4.120050372 |
| 1435689_at   | 0.154216536  | 7.660421893 | 1.952545487  | 0.081245725 | 0.081245725 | -4.120138564 |
| 1430471_at   | -0.127287868 | 4.698505354 | -1.952448337 | 0.081258579 | 0.081258579 | -4.120262779 |
| 1444307_at   | 0.136479648  | 4.184488301 | 1.95244176   | 0.081259449 | 0.081259449 | -4.120271188 |
| 1458104_a_at | -0.424669418 | 5.581439219 | -1.952358046 | 0.081270526 | 0.081270526 | -4.120378222 |
| 1457024_x_at | -0.19269512  | 7.942021559 | -1.952148551 | 0.081298254 | 0.081298254 | -4.120646068 |
| 1442707_at   | -0.186334339 | 4.177818798 | -1.952087761 | 0.081306302 | 0.081306302 | -4.120723789 |
| 1422691_at   | -0.16845128  | 5.278197128 | -1.951941299 | 0.081325694 | 0.081325694 | -4.120911038 |
| 1446549_at   | -0.176468036 | 4.108248891 | -1.951897709 | 0.081331467 | 0.081331467 | -4.120966766 |
| 1428414_at   | 0.500632069  | 5.215215094 | 1.9518751    | 0.081334461 | 0.081334461 | -4.120995671 |
| 1442813_at   | 0.199178364  | 3.511311284 | 1.95165784   | 0.081363238 | 0.081363238 | -4.121273422 |
| 1450440_at   | -0.186173967 | 5.688931347 | -1.951646579 | 0.08136473  | 0.08136473  | -4.121287818 |
| 1448017_at   | -0.12963872  | 3.914882914 | -1.951599724 | 0.081370938 | 0.081370938 | -4.121347718 |
| 1450435_at   | 0.464936753  | 7.294971508 | 1.951472461  | 0.0813878   | 0.0813878   | -4.121510408 |
| 1456109_a_at | 0.159925245  | 9.573766402 | 1.951164418  | 0.081428631 | 0.081428631 | -4.121904191 |
| 1435603_at   | -0.178995285 | 8.719269455 | -1.951008755 | 0.081449271 | 0.081449271 | -4.122103173 |
| 1417963_at   | -0.216003258 | 8.215511618 | -1.950930563 | 0.08145964  | 0.08145964  | -4.122203121 |
| 1453252_at   | 0.264387159  | 5.922889891 | 1.950698724  | 0.081490394 | 0.081490394 | -4.122499464 |
| 1417134_at   | 0.140836092  | 8.851030164 | 1.950687048  | 0.081491943 | 0.081491943 | -4.122514388 |
| 1430110_at   | 0.143118435  | 3.02865137  | 1.950666157  | 0.081494715 | 0.081494715 | -4.122541092 |
| 1452543_a_at | 0.184053976  | 3.540874459 | 1.950574255  | 0.081506909 | 0.081506909 | -4.122658559 |
| 1424342_at   | 0.208330995  | 9.707101438 | 1.950561955  | 0.081508541 | 0.081508541 | -4.122674281 |
| 1440415_at   | -0.202651574 | 3.898357958 | -1.950556935 | 0.081509207 | 0.081509207 | -4.122680698 |
| 1460633_at   | 0.236494059  | 9.706877079 | 1.95055039   | 0.081510076 | 0.081510076 | -4.122689063 |
| 1427096_s_at | -0.130399529 | 6.86986392  | -1.950516974 | 0.08151451  | 0.08151451  | -4.122731774 |
| 1440192_at   | -0.191762185 | 4.174370724 | -1.950398975 | 0.081530172 | 0.081530172 | -4.122882595 |
| 1425319_s_at | 0.241992828  | 8.720743023 | 1.949492885  | 0.081650525 | 0.081650525 | -4.124040614 |
| 1436683_at   | 0.214368323  | 3.548159741 | 1.949183783  | 0.08169162  | 0.08169162  | -4.124435618 |
| 1443088_at   | -0.140085093 | 8.733508151 | -1.949137495 | 0.081697776 | 0.081697776 | -4.124494768 |
| 1435915_at   | 0.153271033  | 3.815378806 | 1.948895368  | 0.081729983 | 0.081729983 | -4.124804168 |
| 1428334_at   | 0.152778416  | 7.557915459 | 1.94883684   | 0.08173777  | 0.08173777  | -4.124878955 |
| 1457452_at   | -0.162589426 | 3.844367336 | -1.948528894 | 0.081778753 | 0.081778753 | -4.125272439 |
| 1446350_at   | -0.141571361 | 3.527539853 | -1.948252067 | 0.081815611 | 0.081815611 | -4.125626143 |
| 1419553_a_at | 0.163421898  | 10.35362804 | 1.947807506  | 0.081874834 | 0.081874834 | -4.126194127 |
| 1434914_at   | 0.526736889  | 6.829901826 | 1.947327029  | 0.081938888 | 0.081938888 | -4.12680795  |
| 1445404_at   | -0.19371649  | 5.54063845  | -1.947266074 | 0.081947018 | 0.081947018 | -4.126885817 |
| 1418623_at   | -0.307573814 | 5.687564477 | -1.947049243 | 0.081975942 | 0.081975942 | -4.127162805 |
| 1442946_at   | 0.175803498  | 6.474144205 | 1.947033436  | 0.081978051 | 0.081978051 | -4.127182998 |
| 1418430_at   | 0.163283482  | 10.42010903 | 1.946906983  | 0.081994924 | 0.081994924 | -4.127344529 |
| 1442681_at   | -0.185118705 | 5.721789756 | -1.946815461 | 0.082007139 | 0.082007139 | -4.127461437 |
| 1456287_at   | 0.175431793  | 5.348527094 | 1.946801005  | 0.082009068 | 0.082009068 | -4.127479902 |
| 1457426_at   | 0.18691519   | 6.585529318 | 1.946614758  | 0.08203393  | 0.08203393  | -4.127717804 |
| 1458544_at   | 0.164594027  | 4.3777798   | 1.946297712  | 0.082076269 | 0.082076269 | -4.128122763 |
| 1453421_at   | -0.158426018 | 6.012535585 | -1.94627556  | 0.082079228 | 0.082079228 | -4.128151057 |
| 1430219_at   | 0.179264436  | 3.406127027 | 1.946215841  | 0.082087205 | 0.082087205 | -4.128227332 |
| 1457514_at   | 0.33991947   | 5.758313444 | 1.946103756  | 0.08210218  | 0.08210218  | -4.12837049  |
| 1452382_at   | 0.183034899  | 11.22061963 | 1.945948382  | 0.082122942 | 0.082122942 | -4.128568933 |

|              |              |             |              |             |             |              |
|--------------|--------------|-------------|--------------|-------------|-------------|--------------|
| 1422574_at   | -0.120021092 | 7.316458473 | -1.945883059 | 0.082131673 | 0.082131673 | -4.128652362 |
| 1442251_at   | 0.213733023  | 5.786775825 | 1.945512485  | 0.082181217 | 0.082181217 | -4.129125631 |
| 1418802_at   | 0.138711403  | 7.377608698 | 1.94537231   | 0.082199965 | 0.082199965 | -4.129304645 |
| 1460550_at   | 0.151284479  | 7.847553328 | 1.945263861  | 0.082214473 | 0.082214473 | -4.129443138 |
| 1444725_at   | -0.202436427 | 4.533313529 | -1.945180906 | 0.082225572 | 0.082225572 | -4.129549074 |
| 1436257_at   | 0.417548665  | 7.555382178 | 1.94513451   | 0.08223178  | 0.08223178  | -4.129608321 |
| 1441218_at   | -0.267268842 | 4.32069082  | -1.944808333 | 0.082275437 | 0.082275437 | -4.130024839 |
| 1439579_at   | -0.138124775 | 4.20804686  | -1.944788162 | 0.082278138 | 0.082278138 | -4.130050596 |
| 1434632_at   | 0.208486688  | 7.812389401 | 1.94476104   | 0.082281769 | 0.082281769 | -4.130085228 |
| 1428762_at   | 0.165813015  | 8.042597043 | 1.944746543  | 0.08228371  | 0.08228371  | -4.13010374  |
| 1429181_at   | -0.580209111 | 8.461380617 | -1.944336409 | 0.082338641 | 0.082338641 | -4.13062743  |
| 1456765_at   | -0.156749252 | 8.044621876 | -1.944102606 | 0.08236997  | 0.08236997  | -4.13092595  |
| 1451807_at   | -0.180299239 | 4.299681998 | -1.943927725 | 0.082393412 | 0.082393412 | -4.131149232 |
| 1448320_at   | -0.212789051 | 8.173688274 | -1.943746817 | 0.082417667 | 0.082417667 | -4.131380201 |
| 1455250_at   | -0.149531967 | 6.242192892 | -1.943657599 | 0.082429632 | 0.082429632 | -4.131494105 |
| 1420513_at   | 0.175026666  | 6.332676692 | 1.943605387  | 0.082436635 | 0.082436635 | -4.131560763 |
| 1436970_a_at | 0.157799198  | 10.43619902 | 1.943435739  | 0.082459392 | 0.082459392 | -4.131777344 |
| 1421865_at   | 0.208162272  | 3.524520844 | 1.943287014  | 0.082479347 | 0.082479347 | -4.131967209 |
| 1459965_at   | 0.134738396  | 4.765854934 | 1.943258627  | 0.082483157 | 0.082483157 | -4.132003448 |
| 1422146_at   | -0.192139743 | 5.319131409 | -1.942713009 | 0.082556408 | 0.082556408 | -4.132699949 |
| 1456506_at   | 0.239776203  | 6.21783952  | 1.942547589  | 0.082578628 | 0.082578628 | -4.132911101 |
| 1437104_at   | 0.231710919  | 4.37022875  | 1.942190766  | 0.082626578 | 0.082626578 | -4.13336655  |
| 1439051_a_at | -0.286412581 | 6.30125611  | -1.941856603 | 0.082671507 | 0.082671507 | -4.133793052 |
| 1433479_at   | 0.172564352  | 7.859437962 | 1.941730386  | 0.082688483 | 0.082688483 | -4.13395414  |
| 1458001_at   | 0.123505186  | 3.166701923 | 1.941609201  | 0.082704786 | 0.082704786 | -4.134108802 |
| 1448812_at   | 0.136773548  | 9.698810813 | 1.941565231  | 0.082710702 | 0.082710702 | -4.134164919 |
| 1425355_at   | -0.205964641 | 6.759002036 | -1.941499586 | 0.082719534 | 0.082719534 | -4.134248696 |
| 1440235_at   | -0.284634207 | 7.982666949 | -1.941258493 | 0.082751982 | 0.082751982 | -4.134556375 |
| 1442000_at   | -0.133525907 | 3.553599156 | -1.941147886 | 0.082766872 | 0.082766872 | -4.134697525 |
| 1452764_at   | 0.193674642  | 6.100801982 | 1.941141524  | 0.082767728 | 0.082767728 | -4.134705645 |
| 1441706_at   | 0.272065028  | 3.676851241 | 1.940802308  | 0.08281341  | 0.08281341  | -4.135138518 |
| 1444736_at   | -0.141359003 | 3.207874721 | -1.940631936 | 0.082836363 | 0.082836363 | -4.135355919 |
| 1417612_at   | 0.146438942  | 8.895624175 | 1.940624554  | 0.082837358 | 0.082837358 | -4.135365339 |
| 1456750_at   | -0.135640108 | 3.894534817 | -1.94060158  | 0.082840453 | 0.082840453 | -4.135394655 |
| 1448794_s_at | 0.175088533  | 9.060953858 | 1.940277804  | 0.082884091 | 0.082884091 | -4.135807787 |
| 1424840_at   | -0.229593106 | 4.249803196 | -1.940186796 | 0.082896361 | 0.082896361 | -4.135923906 |
| 1449830_at   | 0.127183438  | 3.276227996 | 1.940097315  | 0.082908427 | 0.082908427 | -4.136038077 |
| 1460088_at   | -0.183421544 | 4.699170892 | -1.939985111 | 0.082923559 | 0.082923559 | -4.136181237 |
| 1432756_at   | -0.156308856 | 4.105393656 | -1.939854989 | 0.08294111  | 0.08294111  | -4.136347256 |
| 1449562_at   | 0.147908017  | 5.122566318 | 1.939750078  | 0.082955264 | 0.082955264 | -4.136481106 |
| 1441813_at   | -0.227826036 | 3.452051754 | -1.939420015 | 0.082999808 | 0.082999808 | -4.136902198 |
| 1454818_at   | 0.135130465  | 8.403366005 | 1.939414314  | 0.083000577 | 0.083000577 | -4.136909472 |
| 1438798_at   | 0.180545745  | 7.003085805 | 1.939273917  | 0.083019532 | 0.083019532 | -4.137088581 |
| 1420753_at   | 0.17539891   | 4.434765712 | 1.939169491  | 0.083033632 | 0.083033632 | -4.137221799 |
| 1424513_at   | -0.187292299 | 6.595557952 | -1.938968935 | 0.08306072  | 0.08306072  | -4.137477644 |
| 1433750_at   | -0.146284452 | 8.221973639 | -1.938781223 | 0.08308608  | 0.08308608  | -4.137717098 |
| 1430591_at   | 0.174452916  | 3.943901643 | 1.938355063  | 0.083143683 | 0.083143683 | -4.138260695 |
| 1434472_at   | -0.143756439 | 8.456321843 | -1.938201342 | 0.08316447  | 0.08316447  | -4.138456768 |
| 1454098_at   | 0.160550537  | 4.077454103 | 1.938043488  | 0.083185821 | 0.083185821 | -4.138658107 |
| 1440231_at   | -0.127956628 | 7.806216512 | -1.937817592 | 0.083216384 | 0.083216384 | -4.138946222 |
| 1459432_at   | -0.195460166 | 4.068349219 | -1.937801432 | 0.083218571 | 0.083218571 | -4.138966832 |
| 1449363_at   | 0.121324884  | 5.296500424 | 1.937701504  | 0.083232095 | 0.083232095 | -4.139094279 |
| 1432522_s_at | 0.120250558  | 5.314941745 | 1.937604814  | 0.083245182 | 0.083245182 | -4.139217594 |

|              |              |             |              |             |             |              |
|--------------|--------------|-------------|--------------|-------------|-------------|--------------|
| 1446236_at   | -0.262162928 | 4.581117973 | -1.937433579 | 0.083268364 | 0.083268364 | -4.139435978 |
| 1448380_at   | -0.210029335 | 6.300185618 | -1.937290109 | 0.083287793 | 0.083287793 | -4.139618946 |
| 1432289_a_at | -0.199900715 | 6.374972062 | -1.937271498 | 0.083290313 | 0.083290313 | -4.13964268  |
| 1422757_at   | -0.13534392  | 4.026807173 | -1.937168354 | 0.083304284 | 0.083304284 | -4.139774218 |
| 1449181_at   | 0.245105811  | 8.164946426 | 1.937146474  | 0.083307247 | 0.083307247 | -4.139802121 |
| 1426913_at   | 0.184062012  | 7.056832151 | 1.936796258  | 0.083354701 | 0.083354701 | -4.140248723 |
| 1419533_at   | -0.18079132  | 4.357172105 | -1.936762382 | 0.083359292 | 0.083359292 | -4.140291921 |
| 1442049_at   | 0.150671833  | 3.967819518 | 1.936645671  | 0.083375112 | 0.083375112 | -4.140440746 |
| 1427564_at   | 0.267225883  | 6.100964049 | 1.936448186  | 0.083401889 | 0.083401889 | -4.140692565 |
| 1457694_at   | -0.34655916  | 5.433016663 | -1.936227875 | 0.083431769 | 0.083431769 | -4.14097348  |
| 1445486_at   | -0.153924857 | 3.386726719 | -1.935932232 | 0.083471882 | 0.083471882 | -4.141350432 |
| 1417876_at   | 0.219641744  | 6.572848564 | 1.935726951  | 0.083499746 | 0.083499746 | -4.141612159 |
| 1429026_at   | 0.139931838  | 6.826788464 | 1.935698225  | 0.083503646 | 0.083503646 | -4.141648783 |
| 1459927_at   | -0.120033804 | 5.328669706 | -1.935285096 | 0.083559751 | 0.083559751 | -4.14217548  |
| 1455351_at   | 0.137864486  | 7.544239961 | 1.934806624  | 0.083624774 | 0.083624774 | -4.142785434 |
| 1417955_at   | 0.1337916    | 8.599273484 | 1.934711891  | 0.083637653 | 0.083637653 | -4.142906193 |
| 1425106_a_at | -0.141069213 | 6.911232328 | -1.934700702 | 0.083639175 | 0.083639175 | -4.142920455 |
| 1443349_at   | 0.158185899  | 4.248685968 | 1.934622825  | 0.083649764 | 0.083649764 | -4.143019727 |
| 1455420_at   | -0.217183705 | 6.79694979  | -1.934513624 | 0.083664615 | 0.083664615 | -4.143158924 |
| 1442216_at   | -0.146702407 | 6.912402047 | -1.934430646 | 0.083675901 | 0.083675901 | -4.143264694 |
| 1460474_at   | -0.191778065 | 8.651671364 | -1.934123353 | 0.083717711 | 0.083717711 | -4.143656377 |
| 1430013_at   | -0.130667081 | 4.266339007 | -1.933974654 | 0.083737949 | 0.083737949 | -4.143845906 |
| 1458590_at   | -0.16294786  | 5.341185927 | -1.933954326 | 0.083740717 | 0.083740717 | -4.143871815 |
| 1421961_a_at | -0.158107344 | 5.867551523 | -1.933669277 | 0.083779527 | 0.083779527 | -4.144235116 |
| 1453077_a_at | 0.246262925  | 7.72675733  | 1.933540359  | 0.083797086 | 0.083797086 | -4.14439942  |
| 1444303_at   | 0.122085842  | 4.669737015 | 1.933410141  | 0.083814824 | 0.083814824 | -4.144565377 |
| 1423011_at   | 0.138406427  | 3.50987012  | 1.933356813  | 0.08382209  | 0.08382209  | -4.144633339 |
| 1419781_at   | -0.18044882  | 4.700247662 | -1.933276696 | 0.083833006 | 0.083833006 | -4.144735441 |
| 1452453_a_at | -0.168546782 | 3.663242163 | -1.933189009 | 0.083844956 | 0.083844956 | -4.14484719  |
| 1446474_at   | 0.142643016  | 6.853819117 | 1.933187977  | 0.083845097 | 0.083845097 | -4.144848505 |
| 1449704_at   | -0.200534298 | 3.743260629 | -1.932774187 | 0.083901508 | 0.083901508 | -4.145375813 |
| 1429109_at   | 0.176820396  | 9.542802714 | 1.932640049  | 0.083919802 | 0.083919802 | -4.145546743 |
| 1460153_at   | -0.140038609 | 3.779124116 | -1.932291533 | 0.083967352 | 0.083967352 | -4.145990831 |
| 1435595_at   | 0.205167488  | 7.767183003 | 1.932092917  | 0.083994461 | 0.083994461 | -4.146243901 |
| 1447873_x_at | 0.130488688  | 3.556678187 | 1.931982382  | 0.084009552 | 0.084009552 | -4.146384737 |
| 1417609_at   | 0.132494213  | 9.187177875 | 1.931895047  | 0.084021477 | 0.084021477 | -4.146496011 |
| 1423838_s_at | 0.130900757  | 10.91795629 | 1.931880478  | 0.084023467 | 0.084023467 | -4.146514574 |
| 1424945_at   | -0.441862015 | 4.988600081 | -1.931875089 | 0.084024202 | 0.084024202 | -4.146521439 |
| 1460341_at   | 0.251999083  | 7.604439418 | 1.93176937   | 0.084038641 | 0.084038641 | -4.146656135 |
| 1428987_at   | -0.733788089 | 8.947966044 | -1.931595277 | 0.084062421 | 0.084062421 | -4.146877938 |
| 1433548_at   | 0.145301007  | 8.220286583 | 1.931497724  | 0.08407575  | 0.08407575  | -4.147002222 |
| 1459696_at   | -0.17126233  | 5.080934654 | -1.931474418 | 0.084078934 | 0.084078934 | -4.147031914 |
| 1431944_at   | -0.172465821 | 4.553341965 | -1.931251185 | 0.084109442 | 0.084109442 | -4.147316309 |
| 1417026_at   | 0.158385065  | 9.459488681 | 1.931099636  | 0.08413016  | 0.08413016  | -4.147509373 |
| 1421685_at   | -0.150054871 | 3.300100629 | -1.931049589 | 0.084137003 | 0.084137003 | -4.147573128 |
| 1422851_at   | 0.267860339  | 10.74518411 | 1.930613463  | 0.084196654 | 0.084196654 | -4.148128694 |
| 1456085_x_at | 0.155978589  | 9.616928997 | 1.930461518  | 0.084217446 | 0.084217446 | -4.148322241 |
| 1449089_at   | 0.170796713  | 9.038572503 | 1.930380137  | 0.084228584 | 0.084228584 | -4.148425901 |
| 1438469_at   | -0.179453623 | 6.117618112 | -1.930317336 | 0.08423718  | 0.08423718  | -4.148505894 |
| 1428281_at   | 0.317815006  | 7.233875287 | 1.930265285  | 0.084244306 | 0.084244306 | -4.148572194 |
| 1428126_a_at | 0.146525861  | 10.23810192 | 1.930051657  | 0.084273555 | 0.084273555 | -4.148844295 |
| 1448946_at   | 0.122998756  | 8.513166761 | 1.930011251  | 0.084279088 | 0.084279088 | -4.148895759 |
| 1450922_a_at | 0.148818695  | 8.289279745 | 1.929906676  | 0.084293411 | 0.084293411 | -4.149028953 |



|              |              |             |              |             |             |              |
|--------------|--------------|-------------|--------------|-------------|-------------|--------------|
| 1437749_s_at | 0.184225018  | 8.854930859 | 1.929839089  | 0.084302669 | 0.084302669 | -4.149115035 |
| 1423355_at   | 0.209901673  | 5.783602933 | 1.929332402  | 0.084372104 | 0.084372104 | -4.149760344 |
| 1426081_a_at | -0.204980183 | 4.425675949 | -1.928959564 | 0.084423231 | 0.084423231 | -4.150235149 |
| 1443566_at   | -0.147519274 | 5.404962961 | -1.928786719 | 0.084446943 | 0.084446943 | -4.150455253 |
| 1443212_at   | 0.22878871   | 7.089778527 | 1.928717831  | 0.084456395 | 0.084456395 | -4.150542976 |
| 1420894_at   | 0.182406031  | 5.957612201 | 1.928709129  | 0.084457589 | 0.084457589 | -4.150554057 |
| 1437774_at   | 0.255536088  | 8.380589394 | 1.928591149  | 0.08447378  | 0.08447378  | -4.15070429  |
| 1447144_at   | -0.144520157 | 3.412888154 | -1.928356838 | 0.084505944 | 0.084505944 | -4.151002646 |
| 1440030_at   | -0.173203682 | 4.821457408 | -1.928216999 | 0.084525145 | 0.084525145 | -4.151180703 |
| 1423597_at   | 0.323888904  | 7.544454609 | 1.928157371  | 0.084533334 | 0.084533334 | -4.151256626 |
| 1452564_at   | -0.153424908 | 3.308132273 | -1.927986275 | 0.084556835 | 0.084556835 | -4.151474472 |
| 1419976_s_at | 0.12928212   | 8.570879062 | 1.927879643  | 0.084571485 | 0.084571485 | -4.151610239 |
| 1442379_at   | 0.160672423  | 4.356268982 | 1.927630835  | 0.084605676 | 0.084605676 | -4.151927015 |
| 1423501_at   | 0.325353618  | 8.12298587  | 1.92749322   | 0.084624593 | 0.084624593 | -4.152102217 |
| 1449166_at   | 0.233661751  | 7.711356099 | 1.92732434   | 0.084647813 | 0.084647813 | -4.152317218 |
| 1426168_a_at | 0.155959951  | 4.404637822 | 1.9273134    | 0.084649317 | 0.084649317 | -4.152331146 |
| 1426555_at   | -0.135807717 | 10.08133309 | -1.927305558 | 0.084650396 | 0.084650396 | -4.15234113  |
| 1427609_at   | 0.129911488  | 5.788458013 | 1.927210335  | 0.084663491 | 0.084663491 | -4.152462354 |
| 1444367_at   | -0.207042708 | 4.87768229  | -1.927170491 | 0.084668971 | 0.084668971 | -4.152513077 |
| 1417704_a_at | 0.201379576  | 3.679701763 | 1.927160743  | 0.084670312 | 0.084670312 | -4.152525487 |
| 1433086_at   | 0.284152136  | 7.751150852 | 1.926503732  | 0.084760727 | 0.084760727 | -4.153361842 |
| 1420760_s_at | 0.185553009  | 8.759044693 | 1.926478185  | 0.084764245 | 0.084764245 | -4.15339436  |
| 1449294_at   | 0.181676972  | 9.490359158 | 1.926477398  | 0.084764353 | 0.084764353 | -4.153395362 |
| 1425994_a_at | -0.162093016 | 4.516411682 | -1.926394641 | 0.084775749 | 0.084775749 | -4.153500702 |
| 1454587_at   | 0.20701955   | 5.719817282 | 1.92629738   | 0.084789143 | 0.084789143 | -4.153624502 |
| 1449301_at   | -0.17798669  | 4.632087611 | -1.926290419 | 0.084790102 | 0.084790102 | -4.153633362 |
| 1432298_at   | -0.175201358 | 4.188944023 | -1.926265532 | 0.08479353  | 0.08479353  | -4.15366504  |
| 1434091_at   | -0.125773617 | 3.963694434 | -1.926093633 | 0.084817209 | 0.084817209 | -4.153883836 |
| 1431185_at   | -0.144651721 | 3.171294116 | -1.925711447 | 0.084869879 | 0.084869879 | -4.154370268 |
| 1456639_at   | 0.379663717  | 5.835756311 | 1.925582711  | 0.084887627 | 0.084887627 | -4.154534111 |
| 1449845_a_at | -0.202449966 | 8.469886213 | -1.925512867 | 0.084897257 | 0.084897257 | -4.154623    |
| 1442698_at   | 0.217043242  | 5.076229674 | 1.925325085  | 0.084923155 | 0.084923155 | -4.154861981 |
| 1429366_at   | -0.658074579 | 6.934063354 | -1.925306624 | 0.084925701 | 0.084925701 | -4.154885475 |
| 1450926_at   | 0.157825173  | 4.473043657 | 1.925234727  | 0.084935619 | 0.084935619 | -4.154976973 |
| 1417287_at   | -0.129950397 | 9.264451265 | -1.924940608 | 0.084976202 | 0.084976202 | -4.155351261 |
| 1421538_at   | -0.172788552 | 4.876422729 | -1.924929136 | 0.084977786 | 0.084977786 | -4.15536586  |
| 1429449_at   | 0.252217211  | 6.301695139 | 1.924758012  | 0.085001407 | 0.085001407 | -4.155583619 |
| 1434242_at   | -0.119979952 | 7.720410459 | -1.924678424 | 0.085012395 | 0.085012395 | -4.155684894 |
| 1419609_at   | 0.368997462  | 5.086652255 | 1.924657392  | 0.085015299 | 0.085015299 | -4.155711658 |
| 1445218_at   | 0.177146245  | 4.29625546  | 1.924632641  | 0.085018716 | 0.085018716 | -4.155743153 |
| 1454014_a_at | 0.1449582    | 5.997080946 | 1.924374632  | 0.085054349 | 0.085054349 | -4.156071456 |
| 1432295_a_at | -0.154909111 | 7.384218212 | -1.924035837 | 0.08510116  | 0.08510116  | -4.156502531 |
| 1450729_at   | 0.135226309  | 10.42266312 | 1.923630106  | 0.085157251 | 0.085157251 | -4.157018741 |
| 1432207_a_at | 0.127894344  | 7.438233259 | 1.923473452  | 0.085178917 | 0.085178917 | -4.157218041 |
| 1416072_at   | 0.140734203  | 8.915830466 | 1.92333718   | 0.085197769 | 0.085197769 | -4.157391406 |
| 1423765_at   | -0.128996656 | 7.665805327 | -1.923314539 | 0.085200901 | 0.085200901 | -4.157420209 |
| 1435201_at   | -0.178838499 | 4.076912225 | -1.923287422 | 0.085204653 | 0.085204653 | -4.157454707 |
| 1438247_at   | 0.253280116  | 4.300080249 | 1.922945096  | 0.085252031 | 0.085252031 | -4.157890192 |
| 1419223_a_at | -0.19920238  | 4.330629867 | -1.922926045 | 0.085254668 | 0.085254668 | -4.157914427 |
| 1435493_at   | 0.205180577  | 9.789490097 | 1.922921623  | 0.08525528  | 0.08525528  | -4.157920051 |
| 1439530_a_at | 0.147217584  | 7.615646046 | 1.922660284  | 0.085291467 | 0.085291467 | -4.15825249  |
| 1448527_at   | 0.129297264  | 10.29304894 | 1.922369552  | 0.085331741 | 0.085331741 | -4.1586223   |
| 1416007_at   | 0.158981894  | 8.491590752 | 1.922365282  | 0.085332333 | 0.085332333 | -4.158627732 |

|              |              |             |              |             |             |              |
|--------------|--------------|-------------|--------------|-------------|-------------|--------------|
| 1446890_at   | -0.175553824 | 4.55632691  | -1.922236821 | 0.085350134 | 0.085350134 | -4.158791128 |
| 1423424_at   | 0.158719927  | 3.341268305 | 1.922091754  | 0.08537024  | 0.08537024  | -4.158975642 |
| 1451874_at   | -0.151824374 | 3.588255544 | -1.921898978 | 0.085396966 | 0.085396966 | -4.159220829 |
| 1417363_at   | 0.191158073  | 7.745523705 | 1.921811154  | 0.085409144 | 0.085409144 | -4.159332528 |
| 1429330_at   | 0.22680765   | 5.362095366 | 1.921779056  | 0.085413596 | 0.085413596 | -4.159373352 |
| 1444245_at   | 0.256355106  | 6.619508599 | 1.921612457  | 0.085436703 | 0.085436703 | -4.159585234 |
| 1442004_at   | 0.150860455  | 5.074840006 | 1.921454075  | 0.085458676 | 0.085458676 | -4.159786661 |
| 1424652_at   | 0.226063265  | 6.153222749 | 1.921090616  | 0.08550912  | 0.08550912  | -4.160248877 |
| 1458639_at   | 0.164955168  | 5.01591515  | 1.920485171  | 0.085593211 | 0.085593211 | -4.161018765 |
| 1432508_at   | -0.141826486 | 4.105861544 | -1.920365228 | 0.085609879 | 0.085609879 | -4.161171276 |
| 1427511_at   | -0.200298897 | 4.823929341 | -1.920254776 | 0.085625232 | 0.085625232 | -4.161311716 |
| 1458170_at   | -0.157181273 | 3.771142966 | -1.919981338 | 0.085663249 | 0.085663249 | -4.161659379 |
| 1450433_at   | 0.147024986  | 5.662528229 | 1.919914303  | 0.085672571 | 0.085672571 | -4.161744609 |
| 1432517_a_at | -0.164629874 | 4.372609184 | -1.919736077 | 0.085697362 | 0.085697362 | -4.161971203 |
| 1459349_at   | -0.138736974 | 4.326418414 | -1.919550021 | 0.085723249 | 0.085723249 | -4.162207745 |
| 1446136_at   | 0.138558795  | 4.580222521 | 1.919515235  | 0.085728089 | 0.085728089 | -4.162251969 |
| 1450615_at   | -0.121174594 | 3.36528761  | -1.919372542 | 0.085747949 | 0.085747949 | -4.162433375 |
| 1422632_at   | 0.168837088  | 5.48458012  | 1.918892645  | 0.085814771 | 0.085814771 | -4.163043435 |
| 1421367_at   | -0.193372487 | 4.450362359 | -1.918724457 | 0.085838202 | 0.085838202 | -4.163257229 |
| 1431514_at   | 0.293028029  | 4.985519979 | 1.918384787  | 0.08588554  | 0.08588554  | -4.163688983 |
| 1433518_at   | 0.13584754   | 7.27085836  | 1.918121545  | 0.085922244 | 0.085922244 | -4.164023571 |
| 1426240_at   | 0.137545011  | 9.569527178 | 1.918114257  | 0.08592326  | 0.08592326  | -4.164032835 |
| 1454214_a_at | 0.137383479  | 9.298175704 | 1.91784297   | 0.085961102 | 0.085961102 | -4.164377633 |
| 1447174_at   | 0.267875661  | 6.174705581 | 1.917817299  | 0.085964683 | 0.085964683 | -4.164410258 |
| 1419477_at   | 0.17247167   | 4.958810398 | 1.917518868  | 0.086006331 | 0.086006331 | -4.164789533 |
| 1422088_at   | -0.237350878 | 5.38790723  | -1.917418582 | 0.08602033  | 0.08602033  | -4.164916982 |
| 1445377_at   | -0.141688358 | 7.496016008 | -1.917288236 | 0.08603853  | 0.08603853  | -4.16508263  |
| 1419478_at   | -0.204027077 | 4.265899207 | -1.917047358 | 0.086072171 | 0.086072171 | -4.165388733 |
| 1425348_a_at | -0.179617578 | 8.729337858 | -1.916792123 | 0.086107831 | 0.086107831 | -4.165713067 |
| 1440307_at   | -0.200389742 | 7.579458574 | -1.916462804 | 0.086153862 | 0.086153862 | -4.16613152  |
| 1424148_a_at | 0.132840136  | 7.076710408 | 1.916004958  | 0.086217896 | 0.086217896 | -4.166713246 |
| 1416160_at   | 0.19177475   | 6.224623319 | 1.915936159  | 0.086227522 | 0.086227522 | -4.166800655 |
| 1441499_at   | 0.213022497  | 4.326235527 | 1.915892199  | 0.086233673 | 0.086233673 | -4.166856506 |
| 1443644_at   | 0.172713642  | 3.362190639 | 1.915873104  | 0.086236345 | 0.086236345 | -4.166880766 |
| 1421354_at   | 0.164937742  | 4.605781477 | 1.915712043  | 0.086258886 | 0.086258886 | -4.167085389 |
| 1450909_at   | 0.303528612  | 6.600304459 | 1.915430357  | 0.086298323 | 0.086298323 | -4.167443248 |
| 1446118_at   | 0.391203178  | 7.290780126 | 1.915401284  | 0.086302394 | 0.086302394 | -4.167480182 |
| 1459153_at   | -0.14729341  | 5.110960102 | -1.915369808 | 0.086306802 | 0.086306802 | -4.167520168 |
| 1432962_at   | 0.255134119  | 4.465699722 | 1.915366086  | 0.086307323 | 0.086307323 | -4.167524897 |
| 1425079_at   | -0.224591519 | 4.231673389 | -1.914690438 | 0.086401993 | 0.086401993 | -4.168383169 |
| 1454791_a_at | 0.317180105  | 10.56569412 | 1.914206685  | 0.086469835 | 0.086469835 | -4.168997612 |
| 1424067_at   | 0.162505582  | 6.648631823 | 1.913894564  | 0.086513634 | 0.086513634 | -4.169394028 |
| 1459865_x_at | -0.13257968  | 8.035561696 | -1.913846515 | 0.086520378 | 0.086520378 | -4.169455052 |
| 1428292_at   | 0.161286958  | 5.254624343 | 1.913555444  | 0.086561245 | 0.086561245 | -4.16982471  |
| 1448146_at   | -0.145024665 | 7.948083918 | -1.913172213 | 0.086615079 | 0.086615079 | -4.170311379 |
| 1423393_at   | 0.130812881  | 10.75974807 | 1.913155099  | 0.086617484 | 0.086617484 | -4.170333111 |
| 1430843_at   | 0.133180699  | 5.407647254 | 1.913128023  | 0.086621288 | 0.086621288 | -4.170367495 |
| 1452899_at   | 0.511636569  | 10.98061787 | 1.913073409  | 0.086628963 | 0.086628963 | -4.170436846 |
| 1431513_at   | -0.120507635 | 3.356990173 | -1.913056497 | 0.08663134  | 0.08663134  | -4.170458321 |
| 1420390_s_at | 0.122057772  | 6.069341453 | 1.913038263  | 0.086633902 | 0.086633902 | -4.170481475 |
| 1451636_at   | -0.161088918 | 4.596676312 | -1.912987557 | 0.086641029 | 0.086641029 | -4.170545864 |
| 1430557_at   | 0.138303966  | 3.587147897 | 1.912979679  | 0.086642136 | 0.086642136 | -4.170555868 |
| 1418615_at   | 0.155019094  | 7.612980936 | 1.912779742  | 0.086670243 | 0.086670243 | -4.170809747 |

|                  |              |             |              |             |             |              |
|------------------|--------------|-------------|--------------|-------------|-------------|--------------|
| 1424029_at       | 0.146285885  | 8.672458854 | 1.912720915  | 0.086678514 | 0.086678514 | -4.170884444 |
| 1457693_a_at     | -0.554061343 | 6.473771121 | -1.91254223  | 0.086703643 | 0.086703643 | -4.171111329 |
| 1441420_at       | 0.207332299  | 5.369313866 | 1.91237683   | 0.086726909 | 0.086726909 | -4.171321338 |
| AFFX-18SRNAMur/X | 0.601366459  | 7.356625463 | 1.912316592  | 0.086735384 | 0.086735384 | -4.171397821 |
| 1446462_at       | 0.150920013  | 4.547975774 | 1.912100303  | 0.08676582  | 0.08676582  | -4.171672432 |
| 1449157_at       | 0.221413374  | 6.632840528 | 1.91183601   | 0.086803025 | 0.086803025 | -4.172007976 |
| 1457156_at       | -0.217360263 | 3.583203234 | -1.911722369 | 0.086819028 | 0.086819028 | -4.172152248 |
| 1420940_x_at     | 0.282179233  | 6.212313937 | 1.911710259  | 0.086820733 | 0.086820733 | -4.172167622 |
| 1419333_at       | -0.155196823 | 6.83490124  | -1.911608946 | 0.086835002 | 0.086835002 | -4.172296241 |
| 1457339_at       | 0.189940444  | 5.736906133 | 1.911182418  | 0.086895097 | 0.086895097 | -4.172837701 |
| 1418219_at       | -0.164473791 | 3.488849866 | -1.910856485 | 0.086941046 | 0.086941046 | -4.173251431 |
| 1415802_at       | -0.152689056 | 9.392162456 | -1.910832627 | 0.08694441  | 0.08694441  | -4.173281715 |
| 1443651_at       | 0.157501356  | 4.633774692 | 1.910653813  | 0.086969629 | 0.086969629 | -4.173508685 |
| 1427855_at       | -0.203804788 | 4.901856926 | -1.910578292 | 0.086980283 | 0.086980283 | -4.173604543 |
| 1426080_a_at     | -0.165665119 | 5.255518131 | -1.910401086 | 0.087005284 | 0.087005284 | -4.173829461 |
| 1435637_at       | 0.196027033  | 8.405778209 | 1.910383623  | 0.087007749 | 0.087007749 | -4.173851625 |
| 1419624_a_at     | -0.243561183 | 4.115667274 | -1.910348787 | 0.087012664 | 0.087012664 | -4.17389584  |
| 1426856_at       | 0.232904745  | 6.191981783 | 1.910337328  | 0.087014282 | 0.087014282 | -4.173910385 |
| 1433545_s_at     | 0.180441491  | 7.584194959 | 1.910228785  | 0.087029601 | 0.087029601 | -4.174048147 |
| 1455475_at       | -0.166530017 | 4.976030081 | -1.909821292 | 0.087087134 | 0.087087134 | -4.174565314 |
| 1445725_at       | -0.17328432  | 5.013551553 | -1.909636778 | 0.087113198 | 0.087113198 | -4.174799476 |
| 1456606_a_at     | 0.173433698  | 4.503303425 | 1.90935107   | 0.087153569 | 0.087153569 | -4.175162045 |
| 1434101_at       | 0.176865875  | 9.35639573  | 1.909175554  | 0.087178379 | 0.087178379 | -4.175384769 |
| 1418777_at       | -0.148776026 | 5.516079635 | -1.909028277 | 0.087199202 | 0.087199202 | -4.175571653 |
| 1438239_at       | -0.606374215 | 9.168782852 | -1.90888773  | 0.087219078 | 0.087219078 | -4.175749993 |
| 1420643_at       | -0.213808819 | 6.633980629 | -1.908792663 | 0.087232525 | 0.087232525 | -4.175870621 |
| 1420245_x_at     | -0.132548122 | 3.250300956 | -1.908697038 | 0.087246052 | 0.087246052 | -4.175991953 |
| 1431751_a_at     | 0.204335063  | 9.678427483 | 1.908611534  | 0.08725815  | 0.08725815  | -4.176100443 |
| 1425937_a_at     | 0.1174815    | 9.179167862 | 1.90858951   | 0.087261266 | 0.087261266 | -4.176128387 |
| 1437361_at       | -0.220504875 | 4.523077846 | -1.908583401 | 0.08726213  | 0.08726213  | -4.176136138 |
| 1435765_at       | 0.20939285   | 4.187065161 | 1.908544032  | 0.087267701 | 0.087267701 | -4.17618609  |
| 1444385_at       | 0.192128359  | 6.410757401 | 1.90808819   | 0.087332229 | 0.087332229 | -4.176764438 |
| 1420728_at       | -0.126057027 | 5.349953375 | -1.907891857 | 0.087360035 | 0.087360035 | -4.17701352  |
| 1448939_at       | 0.237695031  | 7.425139465 | 1.907715966  | 0.087384953 | 0.087384953 | -4.177236661 |
| 1424084_at       | 0.204703621  | 5.024618503 | 1.90769226   | 0.087388312 | 0.087388312 | -4.177266734 |
| 1449267_at       | -0.150484655 | 7.630918027 | -1.907602232 | 0.087401069 | 0.087401069 | -4.177380942 |
| 1451331_at       | -0.147452113 | 6.523560033 | -1.907528111 | 0.087411573 | 0.087411573 | -4.17747497  |
| 1436593_at       | -0.557416978 | 6.690058096 | -1.906765894 | 0.087519663 | 0.087519663 | -4.178441824 |
| 1457927_at       | -0.164523352 | 3.774332022 | -1.90674176  | 0.087523087 | 0.087523087 | -4.178472436 |
| 1441637_at       | -0.321338326 | 5.842356694 | -1.906397849 | 0.0875719   | 0.0875719   | -4.178908632 |
| 1441305_at       | 0.180706741  | 4.312470198 | 1.906352225  | 0.087578377 | 0.087578377 | -4.178966497 |
| 1431533_at       | -0.205157463 | 3.826866944 | -1.906210408 | 0.087598515 | 0.087598515 | -4.17914636  |
| 1421909_at       | 0.238712169  | 6.814966449 | 1.906174681  | 0.087603588 | 0.087603588 | -4.17919167  |
| 1416271_at       | 0.176569009  | 10.25187588 | 1.906106273  | 0.087613304 | 0.087613304 | -4.179278428 |
| 1435544_at       | 0.153504084  | 8.581708353 | 1.906104754  | 0.08761352  | 0.08761352  | -4.179280355 |
| 1435424_x_at     | -0.244077473 | 3.33283784  | -1.906075346 | 0.087617697 | 0.087617697 | -4.179317651 |
| 1439743_at       | -0.156631277 | 6.394585035 | -1.906048746 | 0.087621475 | 0.087621475 | -4.179351386 |
| 1426375_s_at     | -0.127481443 | 7.201565228 | -1.906041478 | 0.087622508 | 0.087622508 | -4.179360603 |
| 1450748_at       | -0.272892675 | 6.721603793 | -1.906020751 | 0.087625452 | 0.087625452 | -4.17938689  |
| 1441459_at       | -0.204129031 | 4.300052652 | -1.90594471  | 0.087636254 | 0.087636254 | -4.179483325 |
| 1432128_at       | -0.131433082 | 3.888535714 | -1.905703505 | 0.087670528 | 0.087670528 | -4.179789213 |
| 1451153_a_at     | -0.168259139 | 7.720272603 | -1.905295437 | 0.087728541 | 0.087728541 | -4.180306681 |
| 1426370_at       | 0.128421256  | 8.976429606 | 1.905233981  | 0.087737281 | 0.087737281 | -4.18038461  |

|              |              |             |              |             |             |              |
|--------------|--------------|-------------|--------------|-------------|-------------|--------------|
| 1423035_s_at | 0.144292431  | 10.88317758 | 1.90519039   | 0.087743481 | 0.087743481 | -4.180439885 |
| 1428909_at   | 0.438052885  | 5.397045576 | 1.904958314  | 0.087776496 | 0.087776496 | -4.180734155 |
| 1420293_at   | -0.166900013 | 4.879888136 | -1.904664933 | 0.087818248 | 0.087818248 | -4.181106142 |
| 1429986_at   | -0.147190798 | 4.227600153 | -1.904327385 | 0.087866309 | 0.087866309 | -4.181534105 |
| 1451410_a_at | -0.160445518 | 5.17249602  | -1.904158383 | 0.087890381 | 0.087890381 | -4.181748366 |
| 1418297_at   | 0.12906605   | 5.463173165 | 1.903355889  | 0.08800477  | 0.08800477  | -4.182765675 |
| 1451566_at   | 0.189727905  | 7.679949732 | 1.903281799  | 0.088015338 | 0.088015338 | -4.182859591 |
| 1437226_x_at | 0.179235971  | 12.23946767 | 1.902932812  | 0.088065132 | 0.088065132 | -4.183301943 |
| 1447769_x_at | -0.132583336 | 6.578516343 | -1.902909332 | 0.088068484 | 0.088068484 | -4.183331704 |
| 1445217_at   | -0.147054869 | 3.466903287 | -1.902805722 | 0.088083273 | 0.088083273 | -4.183463027 |
| 1418836_at   | -0.187855399 | 6.029931895 | -1.902751416 | 0.088091025 | 0.088091025 | -4.183531857 |
| 1443148_at   | -0.155106968 | 6.489319907 | -1.902722779 | 0.088095113 | 0.088095113 | -4.183568153 |
| 1449559_at   | -0.245917352 | 6.530387795 | -1.901744033 | 0.088234949 | 0.088234949 | -4.184808546 |
| 1422117_s_at | 0.158500504  | 6.186319078 | 1.901571202  | 0.088259664 | 0.088259664 | -4.185027555 |
| 1460012_at   | -0.122081674 | 4.692221864 | -1.901554084 | 0.088262112 | 0.088262112 | -4.185049247 |
| 1459926_at   | -0.211895266 | 3.449724126 | -1.901527404 | 0.088265928 | 0.088265928 | -4.185083055 |
| 1456977_at   | -0.146213067 | 3.66506319  | -1.901462753 | 0.088275175 | 0.088275175 | -4.185164978 |
| 1435957_at   | -0.188149382 | 5.006202283 | -1.901189993 | 0.088314199 | 0.088314199 | -4.185510597 |
| 1437935_at   | 0.237701312  | 3.553374355 | 1.901177851  | 0.088315936 | 0.088315936 | -4.185525982 |
| 1417760_at   | -0.196268205 | 3.912676708 | -1.901036874 | 0.088336112 | 0.088336112 | -4.185704608 |
| 1439540_at   | 0.261634956  | 4.588306129 | 1.900956043  | 0.088347683 | 0.088347683 | -4.185807024 |
| 1454939_at   | 0.149234398  | 5.682412253 | 1.900843976  | 0.088363727 | 0.088363727 | -4.185949015 |
| 1420796_at   | 0.290733768  | 5.63741324  | 1.900830139  | 0.088365708 | 0.088365708 | -4.185966547 |
| 1430409_at   | -0.151944285 | 3.971170363 | -1.900674887 | 0.088387939 | 0.088387939 | -4.186163248 |
| 1443715_at   | -0.185083803 | 4.277767285 | -1.900180941 | 0.088458704 | 0.088458704 | -4.18678903  |
| 1445115_at   | -0.196654873 | 6.375033638 | -1.900029281 | 0.088480442 | 0.088480442 | -4.186981157 |
| 1438949_at   | -0.137351243 | 6.835745224 | -1.900025817 | 0.088480939 | 0.088480939 | -4.186985546 |
| 1429405_at   | 0.206559677  | 4.592894789 | 1.900020925  | 0.08848164  | 0.08848164  | -4.186991743 |
| 1420774_a_at | -0.261272577 | 5.839083345 | -1.89996282  | 0.08848997  | 0.08848997  | -4.187065351 |
| 1451847_s_at | 0.213287977  | 6.777940046 | 1.899849753  | 0.088506182 | 0.088506182 | -4.187208581 |
| 1423417_at   | 0.139076313  | 8.543252967 | 1.899673856  | 0.088531407 | 0.088531407 | -4.187431398 |
| 1459710_at   | 0.146504308  | 6.413677541 | 1.899655506  | 0.088534039 | 0.088534039 | -4.187454642 |
| 1433251_at   | -0.153205283 | 4.391358917 | -1.899300564 | 0.088584963 | 0.088584963 | -4.187904241 |
| 1421537_at   | -0.138019725 | 4.712733128 | -1.899027094 | 0.088624217 | 0.088624217 | -4.188250619 |
| 1450929_at   | -0.152145333 | 5.344796287 | -1.898895838 | 0.088643064 | 0.088643064 | -4.188416863 |
| 1456929_at   | -0.16034677  | 4.739831667 | -1.898352084 | 0.088721178 | 0.088721178 | -4.189105517 |
| 1446415_at   | -0.210678657 | 4.463736967 | -1.898199961 | 0.088743044 | 0.088743044 | -4.189298164 |
| 1440203_at   | 0.192712893  | 5.462116363 | 1.898187393  | 0.08874485  | 0.08874485  | -4.18931408  |
| 1450266_at   | -0.164883637 | 3.837251997 | -1.897564236 | 0.088834474 | 0.088834474 | -4.190103186 |
| 1440209_at   | 0.17254545   | 3.752931049 | 1.8972725    | 0.088876461 | 0.088876461 | -4.190472581 |
| 1437083_at   | 0.19980106   | 5.454816891 | 1.897181953  | 0.088889496 | 0.088889496 | -4.190587226 |
| 1443343_at   | -0.139240102 | 4.527123949 | -1.897081348 | 0.088903982 | 0.088903982 | -4.190714605 |
| 1424403_a_at | 0.179339293  | 6.633543446 | 1.897061012  | 0.08890691  | 0.08890691  | -4.190740353 |
| 1440824_at   | 0.185066011  | 5.802429521 | 1.89687874   | 0.088933161 | 0.088933161 | -4.190971125 |
| 1423952_a_at | 0.255471526  | 7.860842059 | 1.896830986  | 0.088940039 | 0.088940039 | -4.191031585 |
| 1451787_at   | -0.194212816 | 5.820797416 | -1.896444973 | 0.088995661 | 0.088995661 | -4.191520281 |
| 1431046_at   | 0.185425772  | 5.599795009 | 1.896147829  | 0.089038499 | 0.089038499 | -4.191896444 |
| 1423498_at   | -0.155124843 | 4.348707089 | -1.896136387 | 0.089040149 | 0.089040149 | -4.191910928 |
| 1449475_at   | 0.16031743   | 4.676460772 | 1.89597813   | 0.089062973 | 0.089062973 | -4.192111261 |
| 1455932_at   | -0.165466171 | 5.446826058 | -1.895695654 | 0.089103725 | 0.089103725 | -4.192468825 |
| 1452353_at   | 0.276428273  | 6.726529916 | 1.895485656  | 0.089134032 | 0.089134032 | -4.192734632 |
| 1426599_a_at | 0.148935403  | 9.811812065 | 1.895453074  | 0.089138735 | 0.089138735 | -4.192775873 |
| 1433142_at   | -0.147187412 | 3.679390345 | -1.895334408 | 0.089155866 | 0.089155866 | -4.19292607  |

|              |              |             |              |             |             |              |
|--------------|--------------|-------------|--------------|-------------|-------------|--------------|
| 1429688_at   | 0.193311869  | 5.263419357 | 1.894923438  | 0.089215219 | 0.089215219 | -4.193446215 |
| 1449843_at   | 0.181877447  | 7.30759336  | 1.894721371  | 0.089244416 | 0.089244416 | -4.193701946 |
| 1457567_at   | -0.190584237 | 6.115441037 | -1.894644757 | 0.089255488 | 0.089255488 | -4.193798904 |
| 1417373_a_at | 0.153231748  | 8.750631799 | 1.894607575  | 0.089260862 | 0.089260862 | -4.19384596  |
| 1435919_at   | -0.146275164 | 4.308331476 | -1.894478588 | 0.089279507 | 0.089279507 | -4.194009194 |
| 1444452_at   | -0.182434021 | 3.762403507 | -1.893993843 | 0.08934961  | 0.08934961  | -4.19462261  |
| 1460594_a_at | -0.135701113 | 8.527060862 | -1.893913363 | 0.089361254 | 0.089361254 | -4.194724447 |
| 1424853_s_at | -0.156171417 | 3.586326468 | -1.893899681 | 0.089363234 | 0.089363234 | -4.194741759 |
| 1453866_a_at | -0.123388744 | 4.233309195 | -1.893523197 | 0.089417723 | 0.089417723 | -4.195218131 |
| 1445219_at   | -0.14601936  | 3.828572609 | -1.893380785 | 0.089438343 | 0.089438343 | -4.195398318 |
| 1446268_at   | 0.13347796   | 3.873795269 | 1.893157224  | 0.089470722 | 0.089470722 | -4.195681169 |
| 1450452_a_at | 0.144316207  | 7.801704156 | 1.892974837  | 0.089497145 | 0.089497145 | -4.195911918 |
| 1443675_at   | 0.264364309  | 6.315407845 | 1.892791797  | 0.08952367  | 0.08952367  | -4.196143485 |
| 1421343_at   | -0.14797754  | 4.061878902 | -1.892263077 | 0.089600331 | 0.089600331 | -4.196812333 |
| 1417209_at   | 0.138327024  | 9.049228317 | 1.892052445  | 0.089630888 | 0.089630888 | -4.197078771 |
| 1440577_at   | 0.149155314  | 3.770173244 | 1.891965874  | 0.08964345  | 0.08964345  | -4.197188275 |
| 1440549_at   | -0.165643245 | 5.557963725 | -1.89182219  | 0.089664304 | 0.089664304 | -4.197370018 |
| 1449850_at   | -0.158877174 | 6.616030712 | -1.891796003 | 0.089668105 | 0.089668105 | -4.197403141 |
| 1457593_at   | -0.182019798 | 7.246874696 | -1.891771827 | 0.089671614 | 0.089671614 | -4.197433721 |
| 1425208_at   | -0.162220304 | 6.537359974 | -1.891205174 | 0.089753905 | 0.089753905 | -4.198150414 |
| 1432275_at   | -0.162063591 | 6.91265624  | -1.891142267 | 0.089763044 | 0.089763044 | -4.198229974 |
| 1450767_at   | -0.179398875 | 7.112805876 | -1.890966642 | 0.089788566 | 0.089788566 | -4.198452083 |
| 1442691_at   | 0.133907976  | 5.037189549 | 1.890901278  | 0.089798066 | 0.089798066 | -4.198534746 |
| 1437672_at   | -0.165862793 | 3.498302396 | -1.890810322 | 0.089811288 | 0.089811288 | -4.198649772 |
| 1452386_at   | 0.195936759  | 6.219063937 | 1.890748824  | 0.089820228 | 0.089820228 | -4.198727543 |
| 1443556_at   | -0.136615083 | 3.793874591 | -1.890640072 | 0.08983604  | 0.08983604  | -4.19886507  |
| 1443559_at   | -0.151095505 | 3.54663626  | -1.89048066  | 0.089859223 | 0.089859223 | -4.199066657 |
| 1460133_at   | -0.140941079 | 8.825713712 | -1.890424513 | 0.089867389 | 0.089867389 | -4.199137657 |
| 1433661_at   | -0.142509857 | 7.077858748 | -1.890339759 | 0.089879718 | 0.089879718 | -4.19924483  |
| 1440805_at   | -0.130080668 | 4.150000284 | -1.890332197 | 0.089880818 | 0.089880818 | -4.199254392 |
| 1450315_at   | -0.254998974 | 4.839227743 | -1.89022113  | 0.089896977 | 0.089896977 | -4.199394835 |
| 1430510_at   | -0.173407334 | 5.810195069 | -1.8899017   | 0.089943466 | 0.089943466 | -4.199798737 |
| 1456519_at   | -0.174629575 | 3.776672025 | -1.889891502 | 0.08994495  | 0.08994495  | -4.19981163  |
| 1438660_at   | 0.130889637  | 6.332840461 | 1.889883085  | 0.089946176 | 0.089946176 | -4.199822273 |
| 1432674_at   | 0.137775096  | 3.596269113 | 1.889868965  | 0.089948231 | 0.089948231 | -4.199840127 |
| 1423157_at   | 0.16440909   | 6.683099303 | 1.889790952  | 0.089959589 | 0.089959589 | -4.199938765 |
| 1441842_s_at | 0.147259401  | 5.101863327 | 1.889348155  | 0.09002408  | 0.09002408  | -4.200498605 |
| 1458592_at   | -0.170613424 | 6.734488117 | -1.889023955 | 0.090071326 | 0.090071326 | -4.200908468 |
| 1438157_s_at | 0.151020975  | 10.10093952 | 1.888853158  | 0.090096225 | 0.090096225 | -4.201124386 |
| 1441350_at   | 0.325273643  | 4.523457958 | 1.888631348  | 0.090128571 | 0.090128571 | -4.201404782 |
| 1424925_at   | 0.142530114  | 8.159355608 | 1.888447566  | 0.09015538  | 0.09015538  | -4.201637096 |
| 1440146_at   | 0.213576582  | 4.44375836  | 1.888290673  | 0.090178272 | 0.090178272 | -4.201835415 |
| 1427722_at   | -0.162203537 | 3.319161108 | -1.888122571 | 0.090202806 | 0.090202806 | -4.202047894 |
| 1440505_at   | -0.176619445 | 5.624019105 | -1.887999678 | 0.090220746 | 0.090220746 | -4.202203227 |
| 1450589_at   | -0.140613611 | 4.141075847 | -1.887727853 | 0.090260438 | 0.090260438 | -4.202546791 |
| 1451529_at   | 0.122030232  | 7.531795353 | 1.887550104  | 0.090286402 | 0.090286402 | -4.202771441 |
| 1458798_at   | 0.276101439  | 4.97785236  | 1.887323242  | 0.09031955  | 0.09031955  | -4.203058151 |
| 1443874_at   | -0.18578134  | 5.178245446 | -1.887208303 | 0.090336349 | 0.090336349 | -4.203203408 |
| 1448486_at   | 0.117906718  | 9.021463199 | 1.88694031   | 0.090375529 | 0.090375529 | -4.203542078 |
| 1436053_at   | -0.204463231 | 7.553404186 | -1.886746379 | 0.09040389  | 0.09040389  | -4.203787142 |
| 1432063_at   | -0.156840838 | 6.037918385 | -1.886674348 | 0.090414427 | 0.090414427 | -4.203878164 |
| 1427777_x_at | -0.188235572 | 6.151756028 | -1.886396307 | 0.090455109 | 0.090455109 | -4.204229494 |
| 1426857_a_at | 0.136112709  | 8.096661267 | 1.886333987  | 0.09046423  | 0.09046423  | -4.20430824  |

|                |              |             |              |             |             |              |
|----------------|--------------|-------------|--------------|-------------|-------------|--------------|
| 1447551_x_at   | -0.152418561 | 6.925317122 | -1.886314374 | 0.0904671   | 0.0904671   | -4.204333021 |
| 1453470_a_at   | -0.170095765 | 6.459639664 | -1.886172861 | 0.090487815 | 0.090487815 | -4.204511826 |
| 1451360_at     | 0.156619459  | 7.16839655  | 1.886015113  | 0.090510911 | 0.090510911 | -4.204711114 |
| 1451702_at     | -0.167761424 | 5.144623585 | -1.885783055 | 0.090544898 | 0.090544898 | -4.205004331 |
| 1452670_at     | 0.146879552  | 10.09798965 | 1.885671671  | 0.090561215 | 0.090561215 | -4.205145054 |
| 1438982_s_at   | 0.216698693  | 7.559034886 | 1.885094809  | 0.090645766 | 0.090645766 | -4.205873814 |
| 1435953_at     | 0.148218895  | 7.681217811 | 1.885060303  | 0.090650826 | 0.090650826 | -4.205917403 |
| 1427100_at     | 0.150311422  | 8.115883209 | 1.885015144  | 0.090657449 | 0.090657449 | -4.205974449 |
| 1451617_at     | -0.1708529   | 4.961129181 | -1.884724983 | 0.090700011 | 0.090700011 | -4.206340979 |
| AFFX-LysX-M_at | 0.128983474  | 4.780598234 | 1.884586303  | 0.09072036  | 0.09072036  | -4.20651615  |
| 1421344_a_at   | 0.183834708  | 10.10240035 | 1.884578618  | 0.090721487 | 0.090721487 | -4.206525857 |
| 1430801_at     | 0.225356485  | 5.180974354 | 1.884422465  | 0.090744406 | 0.090744406 | -4.206723095 |
| 1434653_at     | 0.197245794  | 5.533525394 | 1.883794794  | 0.090836582 | 0.090836582 | -4.207515849 |
| 1430884_at     | -0.129805577 | 3.748297767 | -1.88336926  | 0.090899123 | 0.090899123 | -4.208053248 |
| 1450489_at     | -0.18312024  | 4.339189715 | -1.883149995 | 0.090931364 | 0.090931364 | -4.208330136 |
| 1443236_at     | 0.198555212  | 5.117451386 | 1.883080983  | 0.090941514 | 0.090941514 | -4.208417282 |
| 1448237_x_at   | -0.14403127  | 9.373288654 | -1.88264515  | 0.091005639 | 0.091005639 | -4.208967612 |
| 1447797_x_at   | -0.123816492 | 5.934900885 | -1.882550191 | 0.091019616 | 0.091019616 | -4.20908751  |
| 1457181_at     | -0.226021576 | 7.050190021 | -1.882303335 | 0.09105596  | 0.09105596  | -4.209399191 |
| 1431231_at     | -0.161985984 | 5.484983148 | -1.881703879 | 0.091144274 | 0.091144274 | -4.210156003 |
| 1459712_at     | 0.257038352  | 3.541543842 | 1.881621299  | 0.091156446 | 0.091156446 | -4.210260254 |
| 1426225_at     | -0.315965475 | 7.443114806 | -1.881607107 | 0.091158538 | 0.091158538 | -4.210278169 |
| 1453559_a_at   | 0.143449682  | 7.094982793 | 1.881536112  | 0.091169004 | 0.091169004 | -4.210367793 |
| 1433544_at     | 0.137994239  | 7.89717039  | 1.881463124  | 0.091179765 | 0.091179765 | -4.210459931 |
| 1458408_at     | -0.192156295 | 4.318587723 | -1.881442457 | 0.091182812 | 0.091182812 | -4.210486021 |
| 1451453_at     | -0.255949787 | 6.700090767 | -1.881373656 | 0.091192957 | 0.091192957 | -4.210572871 |
| 1422191_at     | 0.20983709   | 4.782011241 | 1.881029784  | 0.091243679 | 0.091243679 | -4.211006943 |
| 1427624_s_at   | -0.117247345 | 3.351581534 | -1.880922251 | 0.091259545 | 0.091259545 | -4.211142676 |
| 1426190_at     | -0.159442597 | 5.847658373 | -1.880594732 | 0.091307887 | 0.091307887 | -4.211556068 |
| 1426974_at     | -0.131545493 | 9.053721334 | -1.880298098 | 0.091351691 | 0.091351691 | -4.211930455 |
| 1441105_at     | 0.144437435  | 4.105750157 | 1.880093419  | 0.091381928 | 0.091381928 | -4.212188771 |
| 1427358_a_at   | 0.190088379  | 7.470583394 | 1.880051702  | 0.091388091 | 0.091388091 | -4.21224142  |
| 1441749_at     | -0.187333666 | 4.983661605 | -1.879551127 | 0.091462083 | 0.091462083 | -4.212873126 |
| 1455922_at     | 0.150004488  | 8.657641878 | 1.879501135  | 0.091469476 | 0.091469476 | -4.212936211 |
| 1419399_at     | -0.147514874 | 6.129327659 | -1.879104488 | 0.09152815  | 0.09152815  | -4.213436715 |
| 1428533_at     | 0.120867401  | 9.146518678 | 1.879097444  | 0.091529193 | 0.091529193 | -4.213445604 |
| 1435713_at     | 0.137453311  | 6.958710971 | 1.878968668  | 0.091548249 | 0.091548249 | -4.21360809  |
| 1458321_at     | -0.154888318 | 3.41276496  | -1.878904049 | 0.091557814 | 0.091557814 | -4.213689623 |
| 1445331_at     | -0.139118071 | 4.04120034  | -1.878903872 | 0.09155784  | 0.09155784  | -4.213689846 |
| 1455771_at     | -0.15217893  | 5.844954213 | -1.878884227 | 0.091560748 | 0.091560748 | -4.213714633 |
| 1444585_at     | 0.135275528  | 7.22845313  | 1.878818022  | 0.091570548 | 0.091570548 | -4.213798166 |
| 1421300_at     | -0.130197537 | 3.933876799 | -1.87869709  | 0.091588451 | 0.091588451 | -4.213950747 |
| 1455323_at     | 0.166398394  | 8.859929349 | 1.878310049  | 0.091645774 | 0.091645774 | -4.214439055 |
| 1459553_at     | 0.128073325  | 3.30909322  | 1.878062357  | 0.091682476 | 0.091682476 | -4.214751535 |
| 1424866_at     | -0.160158318 | 5.668897427 | -1.877904905 | 0.091705813 | 0.091705813 | -4.214950163 |
| 1440993_at     | -0.180774998 | 4.582464877 | -1.877789661 | 0.091722898 | 0.091722898 | -4.215095542 |
| 1447338_at     | -0.203670647 | 4.464777144 | -1.877783399 | 0.091723827 | 0.091723827 | -4.215103441 |
| 1422734_a_at   | -0.396349889 | 6.120073605 | -1.877435005 | 0.091775495 | 0.091775495 | -4.215542914 |
| 1435946_at     | -0.149040729 | 6.149948696 | -1.877387244 | 0.09178258  | 0.09178258  | -4.215603158 |
| 1433252_at     | -0.136484164 | 4.385209755 | -1.877316543 | 0.09179307  | 0.09179307  | -4.215692338 |
| 1453864_at     | 0.180231194  | 7.597164853 | 1.877176432  | 0.09181386  | 0.09181386  | -4.215869065 |
| 1438800_at     | -0.159579936 | 6.939433433 | -1.877121683 | 0.091821985 | 0.091821985 | -4.215938121 |
| 1448228_at     | -0.209921234 | 11.78414657 | -1.876624758 | 0.091895764 | 0.091895764 | -4.216564865 |

|              |              |             |              |             |             |              |
|--------------|--------------|-------------|--------------|-------------|-------------|--------------|
| 1419114_at   | -0.131643491 | 8.471416411 | -1.876598667 | 0.091899639 | 0.091899639 | -4.216597771 |
| 1434599_a_at | 0.217302231  | 7.910054318 | 1.876596592  | 0.091899947 | 0.091899947 | -4.216600387 |
| 1422069_at   | 0.121494013  | 3.895272257 | 1.876489853  | 0.091915802 | 0.091915802 | -4.216735002 |
| 1457541_at   | -0.323718605 | 5.092128576 | -1.876435655 | 0.091923854 | 0.091923854 | -4.216803354 |
| 1420962_at   | -0.196890404 | 5.071842997 | -1.876239673 | 0.091952975 | 0.091952975 | -4.217050509 |
| 1453494_at   | -0.147987882 | 3.703072192 | -1.876077942 | 0.091977013 | 0.091977013 | -4.217254463 |
| 1447834_at   | -0.19170491  | 7.148876102 | -1.875955344 | 0.091995239 | 0.091995239 | -4.217409064 |
| 1460213_at   | -0.12286282  | 7.720605277 | -1.875873338 | 0.092007432 | 0.092007432 | -4.217512475 |
| 1424357_at   | -0.168669274 | 4.870163876 | -1.875413964 | 0.092075762 | 0.092075762 | -4.218091719 |
| 1457547_at   | -0.154738029 | 5.278278032 | -1.875348634 | 0.092085483 | 0.092085483 | -4.218174093 |
| 1458195_at   | -0.155479084 | 5.445469879 | -1.875149778 | 0.092115079 | 0.092115079 | -4.218424819 |
| 1458930_at   | -0.146002776 | 4.822407428 | -1.87493553  | 0.092146977 | 0.092146977 | -4.218694942 |
| 1444443_at   | 0.198087241  | 5.045006002 | 1.874810063  | 0.092165661 | 0.092165661 | -4.218853125 |
| 1445992_at   | -0.15165245  | 3.411593492 | -1.874746757 | 0.09217509  | 0.09217509  | -4.218932936 |
| 1453157_at   | -0.163426392 | 5.215434896 | -1.874680653 | 0.092184936 | 0.092184936 | -4.219016274 |
| 1416888_at   | -0.142668137 | 7.363238163 | -1.874606087 | 0.092196045 | 0.092196045 | -4.21911028  |
| 1459634_at   | -0.182039048 | 5.15864614  | -1.87456313  | 0.092202445 | 0.092202445 | -4.219164435 |
| 1448911_at   | -0.121525168 | 6.083704561 | -1.874465774 | 0.092216951 | 0.092216951 | -4.219287169 |
| 1434907_at   | -0.134976431 | 7.714569815 | -1.874276334 | 0.092245183 | 0.092245183 | -4.219525982 |
| 1437680_x_at | -0.139560666 | 7.640711758 | -1.874237199 | 0.092251016 | 0.092251016 | -4.219575315 |
| 1442951_at   | 0.350708835  | 5.045181372 | 1.874115285  | 0.092269191 | 0.092269191 | -4.219728998 |
| 1450734_at   | -0.204297355 | 6.994593596 | -1.873959865 | 0.092292365 | 0.092292365 | -4.219924912 |
| 1440831_at   | 0.177985176  | 9.631579086 | 1.873744063  | 0.092324551 | 0.092324551 | -4.220196932 |
| 1455606_at   | -0.174566495 | 7.462383831 | -1.873552676 | 0.092353105 | 0.092353105 | -4.220438166 |
| 1431829_a_at | -0.179831317 | 4.454758203 | -1.873342659 | 0.092384448 | 0.092384448 | -4.220702872 |
| 1417638_at   | 0.119941068  | 5.585648181 | 1.87331864   | 0.092388033 | 0.092388033 | -4.220733145 |
| 1454596_at   | -0.127618888 | 3.448009536 | -1.873243797 | 0.092399206 | 0.092399206 | -4.220827474 |
| 1418757_at   | -0.138696724 | 3.69697574  | -1.873154577 | 0.092412526 | 0.092412526 | -4.220939921 |
| 1432681_at   | 0.139103493  | 3.761247099 | 1.872836468  | 0.092460033 | 0.092460033 | -4.221340831 |
| 1425891_a_at | -0.121144756 | 6.049535062 | -1.872539427 | 0.092504414 | 0.092504414 | -4.221715166 |
| 1422064_a_at | -0.205917655 | 6.924813655 | -1.872483722 | 0.092512739 | 0.092512739 | -4.221785364 |
| 1416011_x_at | 0.124861083  | 8.538435793 | 1.87240758   | 0.092524119 | 0.092524119 | -4.221881315 |
| 1418600_at   | -0.156769354 | 5.598670621 | -1.872365598 | 0.092530395 | 0.092530395 | -4.221934219 |
| 1446302_at   | 0.160766013  | 4.814581733 | 1.872307561  | 0.092539071 | 0.092539071 | -4.222007352 |
| 1417488_at   | 0.161075431  | 4.075267702 | 1.872301305  | 0.092540006 | 0.092540006 | -4.222015236 |
| 1460700_at   | 0.175114386  | 8.77979712  | 1.872076272  | 0.092573654 | 0.092573654 | -4.222298797 |
| 1422696_at   | -0.12470087  | 3.976005538 | -1.871792675 | 0.092616074 | 0.092616074 | -4.222656138 |
| 1432184_a_at | -0.157048795 | 6.232248561 | -1.871451479 | 0.092667135 | 0.092667135 | -4.223086028 |
| 1423487_at   | 0.198932507  | 3.484049633 | 1.87144337   | 0.092668348 | 0.092668348 | -4.223096245 |
| 1443353_at   | 0.138989744  | 7.001409263 | 1.871436235  | 0.092669417 | 0.092669417 | -4.223105235 |
| 1441965_at   | 0.147882629  | 3.358493026 | 1.871260343  | 0.09269575  | 0.09269575  | -4.223326837 |
| 1443010_at   | 0.194373858  | 4.715096625 | 1.871234696  | 0.09269959  | 0.09269959  | -4.223359149 |
| 1430897_at   | 0.170414739  | 3.424453651 | 1.870947334  | 0.092742629 | 0.092742629 | -4.223721173 |
| 1435185_at   | 0.17301082   | 6.977922473 | 1.870771899  | 0.092768913 | 0.092768913 | -4.22394218  |
| 1417392_a_at | -0.162206562 | 6.477545797 | -1.870719565 | 0.092776755 | 0.092776755 | -4.224008106 |
| 1426047_a_at | 0.372291902  | 5.523998207 | 1.870611555  | 0.092792942 | 0.092792942 | -4.224144168 |
| 1446847_at   | -0.142177269 | 4.313387381 | -1.870539584 | 0.09280373  | 0.09280373  | -4.22423483  |
| 1456114_at   | -0.309448121 | 6.43781696  | -1.870319114 | 0.092836783 | 0.092836783 | -4.224512545 |
| 1458339_at   | 0.152871556  | 4.213119504 | 1.870182975  | 0.092857198 | 0.092857198 | -4.224684027 |
| 1437558_at   | 0.197202466  | 7.985915774 | 1.870010133  | 0.092883124 | 0.092883124 | -4.224901735 |
| 1459517_at   | -0.170762426 | 6.080620471 | -1.869914859 | 0.092897418 | 0.092897418 | -4.225021737 |
| 1458984_at   | 0.238273846  | 7.266049414 | 1.869731482  | 0.092924935 | 0.092924935 | -4.2252527   |
| 1456921_at   | -0.140045881 | 3.974861094 | -1.869257546 | 0.092996088 | 0.092996088 | -4.225849587 |

|              |              |             |              |             |             |              |
|--------------|--------------|-------------|--------------|-------------|-------------|--------------|
| 1421317_x_at | -0.434730338 | 9.36519664  | -1.869227632 | 0.09300058  | 0.09300058  | -4.225887259 |
| 1438568_at   | -0.132089862 | 4.823893095 | -1.868583697 | 0.093097342 | 0.093097342 | -4.226698152 |
| 1434223_at   | -0.254658714 | 7.393240636 | -1.868574663 | 0.0930987   | 0.0930987   | -4.226709527 |
| 1455762_at   | -0.16480422  | 5.551564157 | -1.868501107 | 0.093109759 | 0.093109759 | -4.226802149 |
| 1436779_at   | -0.158589836 | 4.353133947 | -1.868328169 | 0.093135765 | 0.093135765 | -4.227019903 |
| 1435225_s_at | 0.16546582   | 6.528617249 | 1.868170961  | 0.093159411 | 0.093159411 | -4.227217847 |
| 1418697_at   | -0.154056603 | 4.023875096 | -1.86806991  | 0.093174613 | 0.093174613 | -4.227345077 |
| 1420452_at   | -0.129948374 | 3.873976641 | -1.867974652 | 0.093188947 | 0.093188947 | -4.227465013 |
| 1460574_at   | -0.133856374 | 9.196206785 | -1.867503956 | 0.0932598   | 0.0932598   | -4.228057614 |
| 1439966_x_at | 0.354533768  | 6.144630738 | 1.86736789   | 0.093280292 | 0.093280292 | -4.228228908 |
| 1423559_at   | -0.136506556 | 4.693860169 | -1.867231307 | 0.093300865 | 0.093300865 | -4.22840085  |
| 1459759_s_at | -0.17935423  | 4.377910386 | -1.866975078 | 0.093339472 | 0.093339472 | -4.228723398 |
| 1416032_at   | -0.258906293 | 7.978977815 | -1.866883423 | 0.093353286 | 0.093353286 | -4.228838771 |
| 1445226_at   | -0.326375891 | 9.00457667  | -1.866857268 | 0.093357228 | 0.093357228 | -4.228871695 |
| 1439250_at   | -0.117096508 | 4.156474476 | -1.866398722 | 0.093426369 | 0.093426369 | -4.229448871 |
| 1432239_at   | -0.144903504 | 3.817118721 | -1.866310835 | 0.093439626 | 0.093439626 | -4.229559488 |
| 1449609_at   | -0.167361624 | 4.851626094 | -1.866129327 | 0.093467011 | 0.093467011 | -4.229787936 |
| 1449081_at   | -0.168960253 | 5.021360948 | -1.865905349 | 0.093500814 | 0.093500814 | -4.230069825 |
| 1431471_at   | 0.189898637  | 4.586517231 | 1.865713678  | 0.09352975  | 0.09352975  | -4.230311044 |
| 1431991_at   | -0.152725219 | 5.185670195 | -1.865580984 | 0.093549788 | 0.093549788 | -4.230478035 |
| 1435828_at   | 0.221503236  | 7.695711908 | 1.86555619   | 0.093553532 | 0.093553532 | -4.230509237 |
| 1431981_at   | 0.186822585  | 6.223233119 | 1.865497207  | 0.093562441 | 0.093562441 | -4.230583463 |
| 1444353_at   | -0.152551861 | 4.54445966  | -1.865482042 | 0.093564731 | 0.093564731 | -4.230602548 |
| 1436345_at   | -0.129215385 | 7.756602483 | -1.86537787  | 0.093580467 | 0.093580467 | -4.230733638 |
| 1453825_at   | -0.172278752 | 4.337355573 | -1.865376319 | 0.093580701 | 0.093580701 | -4.23073559  |
| 1453591_at   | -0.283990399 | 5.373776012 | -1.865180549 | 0.09361028  | 0.09361028  | -4.230981941 |
| 1416948_at   | 0.152096687  | 9.75416544  | 1.864996656  | 0.093638072 | 0.093638072 | -4.231213339 |
| 1429247_at   | 0.158260763  | 7.30400441  | 1.864939326  | 0.093646738 | 0.093646738 | -4.231285476 |
| 1433317_at   | -0.134309702 | 4.507527749 | -1.864886216 | 0.093654767 | 0.093654767 | -4.231352303 |
| 1441701_at   | 0.346240042  | 5.128498443 | 1.864822723  | 0.093664366 | 0.093664366 | -4.231432195 |
| 1422650_a_at | 0.114946422  | 8.827204231 | 1.864682659  | 0.093685545 | 0.093685545 | -4.231608428 |
| 1416401_at   | -0.168781889 | 9.100850196 | -1.86430353  | 0.093742895 | 0.093742895 | -4.232085439 |
| 1452295_at   | 0.242156429  | 6.916696979 | 1.864235572  | 0.093753178 | 0.093753178 | -4.232170938 |
| 1424509_at   | -0.120953896 | 3.697258007 | -1.864207686 | 0.093757398 | 0.093757398 | -4.232206023 |
| 1440294_at   | -0.151552104 | 7.281682698 | -1.864138849 | 0.093767816 | 0.093767816 | -4.232292626 |
| 1452468_s_at | -0.133618723 | 7.080356056 | -1.864073953 | 0.093777639 | 0.093777639 | -4.232374271 |
| 1448113_at   | 0.243837004  | 9.296241105 | 1.863853789  | 0.093810969 | 0.093810969 | -4.232651246 |
| 1456066_a_at | -0.122623092 | 7.073912136 | -1.863673173 | 0.09383832  | 0.09383832  | -4.232878459 |
| 1453621_at   | -0.121626707 | 3.35807237  | -1.863003941 | 0.09393973  | 0.09393973  | -4.233720276 |
| 1459459_at   | 0.115402188  | 3.58868501  | 1.862807493  | 0.093969517 | 0.093969517 | -4.233967364 |
| 1426649_at   | 0.206242961  | 9.122402163 | 1.862438144  | 0.094025546 | 0.094025546 | -4.234431897 |
| 1424308_at   | 0.132784712  | 7.125195623 | 1.862154567  | 0.094068584 | 0.094068584 | -4.23478853  |
| 1450129_a_at | 0.134654382  | 8.923725671 | 1.86185974   | 0.094113349 | 0.094113349 | -4.23515929  |
| 1433390_at   | -0.194081089 | 5.069249187 | -1.861788103 | 0.094124229 | 0.094124229 | -4.235249374 |
| 1443022_at   | 0.310485402  | 4.964347449 | 1.861702267  | 0.094137267 | 0.094137267 | -4.235357311 |
| 1442935_at   | -0.172608308 | 4.633649616 | -1.861569296 | 0.094157468 | 0.094157468 | -4.235524517 |
| 1421434_at   | -0.203555675 | 4.527627208 | -1.861508859 | 0.094166651 | 0.094166651 | -4.235600513 |
| 1451795_at   | -0.161973677 | 5.681593346 | -1.861484033 | 0.094170423 | 0.094170423 | -4.235631729 |
| 1439329_a_at | -0.139253643 | 4.939760586 | -1.861168873 | 0.094218325 | 0.094218325 | -4.236028005 |
| 1457802_at   | 0.305040487  | 5.834229892 | 1.861055726  | 0.094235527 | 0.094235527 | -4.236170268 |
| 1432074_at   | -0.130073299 | 4.301542324 | -1.860930342 | 0.094254594 | 0.094254594 | -4.236327912 |
| 1422253_at   | -0.194244347 | 4.571366369 | -1.860842955 | 0.094267885 | 0.094267885 | -4.236437781 |
| 1433920_at   | 0.169787849  | 8.618003134 | 1.86073842   | 0.094283786 | 0.094283786 | -4.236569208 |



|              |              |             |              |             |             |              |
|--------------|--------------|-------------|--------------|-------------|-------------|--------------|
| 1438410_at   | -0.209879353 | 6.261002455 | -1.860500338 | 0.094320011 | 0.094320011 | -4.236868524 |
| 1450644_at   | 0.154859019  | 11.59520156 | 1.860444334  | 0.094328534 | 0.094328534 | -4.236938931 |
| 1450737_at   | -0.152629208 | 4.775055895 | -1.860350587 | 0.094342803 | 0.094342803 | -4.237056784 |
| 1417305_at   | -0.229957385 | 5.962630885 | -1.86032231  | 0.094347107 | 0.094347107 | -4.237092332 |
| 1446962_at   | -0.136465642 | 3.417404434 | -1.860117062 | 0.094378355 | 0.094378355 | -4.237350349 |
| 1423065_at   | 0.187226711  | 8.652027042 | 1.860040307  | 0.094390043 | 0.094390043 | -4.237446835 |
| 1445345_at   | 0.13487517   | 7.444079528 | 1.859983684  | 0.094398666 | 0.094398666 | -4.237518014 |
| 1459772_at   | 0.168061093  | 3.891046714 | 1.859894787  | 0.094412206 | 0.094412206 | -4.237629759 |
| 1428715_at   | -0.151012073 | 9.920233075 | -1.859884038 | 0.094413843 | 0.094413843 | -4.237643271 |
| 1416613_at   | 0.399010701  | 4.563514035 | 1.85987249   | 0.094415602 | 0.094415602 | -4.237657787 |
| 1415698_at   | -0.142579478 | 9.234588881 | -1.859747497 | 0.094434643 | 0.094434643 | -4.237814903 |
| 1453965_at   | -0.140558431 | 3.57456291  | -1.859180353 | 0.094521086 | 0.094521086 | -4.238527752 |
| 1459486_at   | -0.152317744 | 3.684460407 | -1.859106169 | 0.094532398 | 0.094532398 | -4.238620988 |
| 1436544_at   | -0.246151864 | 9.246211978 | -1.858787854 | 0.094580953 | 0.094580953 | -4.23902104  |
| 1431658_at   | 0.196251192  | 4.110311292 | 1.858592645  | 0.09461074  | 0.09461074  | -4.239266362 |
| 1432963_at   | -0.124649882 | 3.533175078 | -1.858546891 | 0.094617724 | 0.094617724 | -4.23932386  |
| 1444895_at   | -0.142597637 | 6.85746689  | -1.858447657 | 0.09463287  | 0.09463287  | -4.239448563 |
| 1421178_at   | -0.151010202 | 4.372643764 | -1.85835735  | 0.094646657 | 0.094646657 | -4.239562047 |
| 1418483_a_at | 0.167853394  | 8.27107571  | 1.857774513  | 0.094735678 | 0.094735678 | -4.240294414 |
| 1451631_at   | 0.126104982  | 7.045164926 | 1.857624813  | 0.094758556 | 0.094758556 | -4.240482507 |
| 1438577_at   | -0.118334536 | 5.690041435 | -1.857599711 | 0.094762392 | 0.094762392 | -4.240514046 |
| 1437341_x_at | 0.188824068  | 9.597749708 | 1.857513204  | 0.094775615 | 0.094775615 | -4.240622735 |
| 1444747_at   | 0.232020645  | 4.1754638   | 1.857492168  | 0.094778831 | 0.094778831 | -4.240649166 |
| 1436669_at   | -0.171507192 | 3.552980038 | -1.857434104 | 0.094787708 | 0.094787708 | -4.240722117 |
| 1434355_at   | 0.116726788  | 8.293901763 | 1.857377123  | 0.09479642  | 0.09479642  | -4.240793708 |
| 1440114_x_at | -0.132498231 | 4.594795256 | -1.857280597 | 0.094811179 | 0.094811179 | -4.240914979 |
| 1421251_at   | 0.180815244  | 4.419075463 | 1.856821732  | 0.094881372 | 0.094881372 | -4.241491451 |
| 1433795_at   | 0.144184035  | 9.314755217 | 1.856470388  | 0.094935151 | 0.094935151 | -4.241932808 |
| 1450505_a_at | -0.167552411 | 5.043892386 | -1.856406418 | 0.094944945 | 0.094944945 | -4.242013163 |
| 1442591_at   | -0.21045283  | 5.03480947  | -1.856311552 | 0.094959472 | 0.094959472 | -4.242132327 |
| 1437306_at   | 0.156652979  | 4.223658678 | 1.856215294  | 0.094974214 | 0.094974214 | -4.242253236 |
| 1446079_at   | 0.165746057  | 6.326087165 | 1.856203807  | 0.094975974 | 0.094975974 | -4.242267665 |
| 1451995_at   | 0.121420789  | 7.61837501  | 1.856065121  | 0.094997218 | 0.094997218 | -4.242441863 |
| 1452870_at   | 0.119297285  | 8.709405837 | 1.855618296  | 0.095065694 | 0.095065694 | -4.243003072 |
| 1459938_at   | 0.129863858  | 3.918258274 | 1.855321826  | 0.095111153 | 0.095111153 | -4.243375408 |
| 1455845_at   | -0.170569436 | 4.614530747 | -1.855283166 | 0.095117082 | 0.095117082 | -4.243423959 |
| 1423101_at   | -0.223199292 | 6.281389327 | -1.855270896 | 0.095118964 | 0.095118964 | -4.243439368 |
| 1445434_at   | 0.199084104  | 4.978873974 | 1.855021146  | 0.095157278 | 0.095157278 | -4.243753007 |
| 1456872_a_at | 0.145692513  | 6.995951092 | 1.854965662  | 0.095165792 | 0.095165792 | -4.243822683 |
| 1456544_at   | -0.134736018 | 6.938938676 | -1.854784579 | 0.095193583 | 0.095193583 | -4.244050077 |
| 1440825_s_at | 0.251580832  | 6.436314573 | 1.854738156  | 0.095200709 | 0.095200709 | -4.24410837  |
| 1427041_at   | -0.149285654 | 5.097663039 | -1.854282647 | 0.095270656 | 0.095270656 | -4.244680332 |
| 1444577_x_at | 0.165505568  | 5.547221901 | 1.853859642  | 0.095335654 | 0.095335654 | -4.245211431 |
| 1440109_at   | 0.214298281  | 3.538635488 | 1.853501369  | 0.095390737 | 0.095390737 | -4.245661222 |
| 1421844_at   | 0.235663122  | 6.676004962 | 1.853254088  | 0.095428774 | 0.095428774 | -4.245971649 |
| 1451660_a_at | 0.16177974   | 3.709899277 | 1.853241238  | 0.095430751 | 0.095430751 | -4.24598778  |
| 1444257_at   | -0.164394717 | 5.391896623 | -1.853174072 | 0.095441085 | 0.095441085 | -4.246072095 |
| 1440266_at   | -0.137961867 | 4.767216147 | -1.85290431  | 0.0954826   | 0.0954826   | -4.24641072  |
| 1449153_at   | -0.19110474  | 5.551758533 | -1.852762038 | 0.095504502 | 0.095504502 | -4.246589304 |
| 1437476_at   | 0.192625427  | 5.131450495 | 1.852553601  | 0.095536598 | 0.095536598 | -4.24685093  |
| 1443831_s_at | -0.202998193 | 3.675071509 | -1.852546921 | 0.095537627 | 0.095537627 | -4.246859314 |
| 1455160_at   | 0.156049667  | 11.34998906 | 1.852534387  | 0.095539557 | 0.095539557 | -4.246875046 |
| 1444943_at   | 0.171371314  | 5.729939882 | 1.852377209  | 0.095563767 | 0.095563767 | -4.247072324 |

|              |              |             |              |             |             |              |
|--------------|--------------|-------------|--------------|-------------|-------------|--------------|
| 1422856_at   | -0.157878724 | 5.484793197 | -1.85212422  | 0.095602747 | 0.095602747 | -4.247389845 |
| 1419200_at   | 0.246983822  | 6.08702058  | 1.851747526  | 0.095660815 | 0.095660815 | -4.247862594 |
| 1442252_at   | 0.178023473  | 6.532996521 | 1.85173601   | 0.095662591 | 0.095662591 | -4.247877046 |
| 1432870_at   | -0.203818097 | 3.978413881 | -1.851536375 | 0.095693379 | 0.095693379 | -4.24812757  |
| 1458873_at   | 0.277163732  | 5.810656917 | 1.851410895  | 0.095712735 | 0.095712735 | -4.248285033 |
| 1441383_at   | -0.138478833 | 4.827220146 | -1.851218898 | 0.095742359 | 0.095742359 | -4.248525957 |
| 1445507_at   | 0.13774261   | 5.314008711 | 1.850936786  | 0.095785903 | 0.095785903 | -4.248879944 |
| 1423642_at   | -0.151531148 | 11.21514952 | -1.85071376  | 0.095820341 | 0.095820341 | -4.249159777 |
| 1430979_a_at | 0.118614999  | 6.486089151 | 1.850706352  | 0.095821485 | 0.095821485 | -4.249169072 |
| 1454632_at   | -0.144190781 | 7.168128248 | -1.850592646 | 0.095839046 | 0.095839046 | -4.249311735 |
| 1437624_x_at | 0.119152175  | 10.3431283  | 1.850578991  | 0.095841156 | 0.095841156 | -4.249328867 |
| 1423996_a_at | 0.15437948   | 5.589586807 | 1.850552969  | 0.095845175 | 0.095845175 | -4.249361516 |
| 1421527_at   | -0.150344525 | 3.886355958 | -1.850544339 | 0.095846508 | 0.095846508 | -4.249372343 |
| 1443617_at   | -0.146507953 | 3.456782212 | -1.850311756 | 0.095882442 | 0.095882442 | -4.249664143 |
| 1450670_at   | 0.207484528  | 4.841235996 | 1.850289235  | 0.095885923 | 0.095885923 | -4.249692397 |
| 1443520_at   | -0.286303343 | 4.967452999 | -1.850014687 | 0.095928358 | 0.095928358 | -4.250036828 |
| 1430839_at   | -0.19373049  | 3.67525471  | -1.849784237 | 0.095963991 | 0.095963991 | -4.250325921 |
| 1456601_x_at | -0.355685509 | 5.534870491 | -1.849649736 | 0.095984794 | 0.095984794 | -4.250494643 |
| 1439489_at   | -0.153080806 | 3.944464997 | -1.849130489 | 0.096065143 | 0.096065143 | -4.251145955 |
| 1446536_at   | 0.286398905  | 6.08903047  | 1.849025541  | 0.09608139  | 0.09608139  | -4.251277587 |
| 1446700_at   | 0.210924848  | 4.875201688 | 1.848875634  | 0.096104602 | 0.096104602 | -4.251465605 |
| 1454523_at   | 0.313015603  | 4.389653385 | 1.848817672  | 0.096113579 | 0.096113579 | -4.251538301 |
| 1451975_at   | -0.141027266 | 7.468190614 | -1.848698209 | 0.096132082 | 0.096132082 | -4.251688129 |
| 1444299_at   | -0.120172845 | 3.765204508 | -1.848268549 | 0.096198659 | 0.096198659 | -4.252226969 |
| 1422084_at   | -0.25871649  | 4.714675826 | -1.848126821 | 0.096220629 | 0.096220629 | -4.252404701 |
| 1441708_at   | -0.268442814 | 5.028891536 | -1.847648018 | 0.096294887 | 0.096294887 | -4.253005098 |
| 1443522_s_at | 0.171081648  | 7.408606859 | 1.847562055  | 0.096308225 | 0.096308225 | -4.253112885 |
| 1457763_at   | -0.14068764  | 4.158303764 | -1.847323298 | 0.096345279 | 0.096345279 | -4.253412248 |
| 1441648_at   | -0.154403974 | 4.951108845 | -1.847003164 | 0.096394982 | 0.096394982 | -4.253813622 |
| 1457061_at   | 0.175547617  | 4.093156928 | 1.846445474  | 0.096481626 | 0.096481626 | -4.254512772 |
| 1456924_at   | 0.165982544  | 4.641854733 | 1.846423533  | 0.096485036 | 0.096485036 | -4.254540277 |
| 1441765_at   | 0.131421017  | 3.933017073 | 1.84631134   | 0.096502476 | 0.096502476 | -4.254680917 |
| 1451730_at   | 0.13906121   | 7.867323973 | 1.846218251  | 0.096516948 | 0.096516948 | -4.254797608 |
| 1419395_at   | -0.133934917 | 3.543567824 | -1.846201036 | 0.096519625 | 0.096519625 | -4.254819187 |
| 1441144_at   | -0.151449227 | 5.914723464 | -1.84600667  | 0.09654985  | 0.09654985  | -4.255062823 |
| 1445843_at   | 0.157469281  | 8.113761205 | 1.84589261   | 0.096567591 | 0.096567591 | -4.255205793 |
| 1460181_at   | 0.64286455   | 5.369774841 | 1.845669751  | 0.096602264 | 0.096602264 | -4.255485126 |
| 1426290_at   | 0.15494275   | 8.244597319 | 1.845554092  | 0.096620263 | 0.096620263 | -4.25563009  |
| 1421692_at   | 0.123912176  | 4.12888372  | 1.845547736  | 0.096621252 | 0.096621252 | -4.255638055 |
| 1425253_a_at | 0.14215847   | 6.065727497 | 1.845475466  | 0.0966325   | 0.0966325   | -4.255728635 |
| 1441439_at   | -0.138181362 | 3.95316469  | -1.845458799 | 0.096635095 | 0.096635095 | -4.255749524 |
| 1451211_a_at | 0.115801153  | 7.864513441 | 1.845365616  | 0.0966496   | 0.0966496   | -4.255866312 |
| 1440347_at   | -0.176785659 | 6.921451544 | -1.845063905 | 0.096696581 | 0.096696581 | -4.256244435 |
| 1458125_at   | 0.135110714  | 7.563941962 | 1.844759054  | 0.096744072 | 0.096744072 | -4.25662647  |
| 1448353_x_at | -0.13697044  | 11.04990556 | -1.844627205 | 0.096764618 | 0.096764618 | -4.256791694 |
| 1423998_at   | 0.127877189  | 8.156116245 | 1.844276371  | 0.09681931  | 0.09681931  | -4.257231311 |
| 1454664_a_at | 0.150773962  | 10.72125331 | 1.84417709   | 0.096834793 | 0.096834793 | -4.257355711 |
| 1458898_at   | -0.154927622 | 3.904114633 | -1.843973935 | 0.096866481 | 0.096866481 | -4.257610258 |
| 1420763_at   | -0.172547663 | 3.876750159 | -1.843795838 | 0.096894268 | 0.096894268 | -4.257833399 |
| 1434333_a_at | 0.257749409  | 6.237408065 | 1.843790623  | 0.096895082 | 0.096895082 | -4.257839933 |
| 1431874_at   | -0.139084487 | 7.178199612 | -1.843722247 | 0.096905752 | 0.096905752 | -4.2579256   |
| 1434076_at   | 0.129831737  | 8.306517185 | 1.843719606  | 0.096906164 | 0.096906164 | -4.257928909 |
| 1457501_at   | -0.187858505 | 4.532439159 | -1.843684677 | 0.096911616 | 0.096911616 | -4.257972671 |

|              |              |             |              |             |             |              |
|--------------|--------------|-------------|--------------|-------------|-------------|--------------|
| 1442186_at   | -0.114831006 | 7.456798809 | -1.843663378 | 0.09691494  | 0.09691494  | -4.257999356 |
| 1428492_at   | 0.219304505  | 7.697828644 | 1.843642471  | 0.096918203 | 0.096918203 | -4.258025549 |
| 1446361_at   | 0.182075808  | 4.589448721 | 1.843475325  | 0.096944295 | 0.096944295 | -4.258234956 |
| 1453614_a_at | -0.202142039 | 5.792492269 | -1.843466201 | 0.096945719 | 0.096945719 | -4.258246386 |
| 1419182_at   | -0.251599183 | 8.542753513 | -1.843283427 | 0.096974258 | 0.096974258 | -4.258475363 |
| 1448514_at   | -0.163558755 | 3.93662389  | -1.843158525 | 0.096993765 | 0.096993765 | -4.258631833 |
| 1432399_a_at | -0.212408983 | 5.284073245 | -1.843150716 | 0.096994985 | 0.096994985 | -4.258641616 |
| 1430967_at   | 0.156759422  | 5.511375267 | 1.843139599  | 0.096996721 | 0.096996721 | -4.258655543 |
| 1460630_at   | 0.190600391  | 4.325344881 | 1.842970402  | 0.097023153 | 0.097023153 | -4.258867496 |
| 1440955_at   | 0.156133653  | 8.297244901 | 1.842877438  | 0.097037678 | 0.097037678 | -4.258983949 |
| 1449013_at   | -0.173647626 | 6.612332483 | -1.842521209 | 0.097093357 | 0.097093357 | -4.259430166 |
| 1437340_x_at | -0.123781318 | 5.028149608 | -1.84239546  | 0.097113019 | 0.097113019 | -4.259587673 |
| 1435323_a_at | 0.15798541   | 8.04939352  | 1.842249808  | 0.097135798 | 0.097135798 | -4.259770103 |
| 1418247_s_at | -0.175353455 | 6.35273448  | -1.842229262 | 0.097139011 | 0.097139011 | -4.259795837 |
| 1423926_at   | -0.148443601 | 8.21610407  | -1.842040435 | 0.09716855  | 0.09716855  | -4.260032336 |
| 1420486_at   | 0.146581508  | 10.12360827 | 1.841756333  | 0.097213009 | 0.097213009 | -4.260388146 |
| 1448005_at   | 0.133377856  | 9.804087325 | 1.841689049  | 0.097223541 | 0.097223541 | -4.26047241  |
| 1423162_s_at | 0.304032662  | 7.288693774 | 1.841653361  | 0.097229128 | 0.097229128 | -4.260517103 |
| 1426082_a_at | -0.260432137 | 5.380985056 | -1.84165283  | 0.097229211 | 0.097229211 | -4.260517768 |
| 1452492_a_at | -0.176690817 | 5.168049535 | -1.841643241 | 0.097230712 | 0.097230712 | -4.260529777 |
| 1446176_at   | 0.527372239  | 6.119676201 | 1.841443611  | 0.097261968 | 0.097261968 | -4.260779775 |
| 1441801_at   | -0.159390688 | 3.739123943 | -1.84098239  | 0.097334218 | 0.097334218 | -4.261357327 |
| 1452935_at   | -0.4324012   | 7.022252078 | -1.840786123 | 0.097364979 | 0.097364979 | -4.26160308  |
| 1415868_at   | 0.121390747  | 6.791393211 | 1.840725429  | 0.097374493 | 0.097374493 | -4.261679075 |
| 1438428_at   | -0.182520354 | 5.943991629 | -1.840723692 | 0.097374765 | 0.097374765 | -4.261681251 |
| 1444632_at   | 0.122045393  | 4.420454193 | 1.8406473    | 0.097386741 | 0.097386741 | -4.2617769   |
| 1421333_a_at | 0.153561906  | 6.471066207 | 1.840412629  | 0.09742354  | 0.09742354  | -4.262070718 |
| 1441136_at   | -0.18111932  | 5.65874556  | -1.840342944 | 0.09743447  | 0.09743447  | -4.262157965 |
| 1423668_at   | -0.182694647 | 6.357546473 | -1.839859955 | 0.097510256 | 0.097510256 | -4.262762635 |
| 1453702_at   | -0.127478178 | 3.737451022 | -1.839776041 | 0.097523429 | 0.097523429 | -4.262867684 |
| 1420246_at   | -0.145751135 | 3.642566295 | -1.839687041 | 0.097537401 | 0.097537401 | -4.262979097 |
| 1441572_at   | 0.388367845  | 7.165401014 | 1.83958771   | 0.097552998 | 0.097552998 | -4.26310344  |
| 1429838_at   | -0.162589153 | 3.562637786 | -1.839306463 | 0.097597172 | 0.097597172 | -4.263455495 |
| 1452799_at   | -0.363012891 | 5.797589344 | -1.839256474 | 0.097605026 | 0.097605026 | -4.263518067 |
| 1447682_x_at | 0.128761604  | 3.708285336 | 1.839189041  | 0.09761562  | 0.09761562  | -4.263602474 |
| 1425052_at   | 0.128387984  | 10.19226864 | 1.839180467  | 0.097616968 | 0.097616968 | -4.263613206 |
| 1420419_a_at | -0.131013339 | 5.017350762 | -1.839084574 | 0.097632036 | 0.097632036 | -4.263733233 |
| 1440262_at   | -0.125689043 | 5.56149924  | -1.838838618 | 0.097670695 | 0.097670695 | -4.26404108  |
| 1459075_at   | 0.142099391  | 3.327484837 | 1.838602219  | 0.097707865 | 0.097707865 | -4.264336951 |
| 1437375_at   | 0.136350127  | 7.63280134  | 1.838336936  | 0.097749593 | 0.097749593 | -4.264668954 |
| 1421811_at   | -0.17329347  | 10.02321715 | -1.838326679 | 0.097751206 | 0.097751206 | -4.26468179  |
| 1442877_at   | -0.148278151 | 4.689944813 | -1.838315437 | 0.097752975 | 0.097752975 | -4.26469586  |
| 1427334_s_at | 0.301069977  | 7.696514685 | 1.838057481  | 0.097793567 | 0.097793567 | -4.265018674 |
| 1417127_at   | 0.351171551  | 8.012806129 | 1.837935441  | 0.097812777 | 0.097812777 | -4.265171393 |
| 1425542_a_at | 0.124653804  | 9.799382974 | 1.837826503  | 0.097829928 | 0.097829928 | -4.265307713 |
| 1421019_at   | 0.138920396  | 8.707818792 | 1.837744179  | 0.09784289  | 0.09784289  | -4.265410727 |
| 1437063_at   | -0.241412767 | 4.045806659 | -1.837684388 | 0.097852305 | 0.097852305 | -4.265485544 |
| 1427606_at   | -0.141747657 | 5.061007767 | -1.837635368 | 0.097860025 | 0.097860025 | -4.265546883 |
| 1437743_at   | 0.291384453  | 6.98541785  | 1.837274163  | 0.097916927 | 0.097916927 | -4.265998837 |
| 1421365_at   | 0.21324181   | 8.300246976 | 1.83701254   | 0.097958161 | 0.097958161 | -4.266326169 |
| 1438108_at   | -0.210390996 | 5.420615753 | -1.836986546 | 0.097962258 | 0.097962258 | -4.266358691 |
| 1438641_x_at | 0.198881957  | 4.804990845 | 1.836777775  | 0.097995175 | 0.097995175 | -4.266619883 |
| 1421020_at   | -0.147098395 | 5.306003327 | -1.836460972 | 0.098045144 | 0.098045144 | -4.267016209 |

|              |              |             |              |             |             |              |
|--------------|--------------|-------------|--------------|-------------|-------------|--------------|
| 1436582_at   | 0.137616571  | 8.022304079 | 1.836396974  | 0.098055241 | 0.098055241 | -4.267096269 |
| 1437337_x_at | 0.127130503  | 7.585289847 | 1.83631978   | 0.098067422 | 0.098067422 | -4.267192836 |
| 1439772_at   | 0.294078164  | 7.115333453 | 1.836267135  | 0.09807573  | 0.09807573  | -4.26725869  |
| 1438978_x_at | -0.178895792 | 3.806662069 | -1.836129855 | 0.098097397 | 0.098097397 | -4.267430416 |
| 1446413_at   | -0.163433795 | 4.41553497  | -1.836071157 | 0.098106662 | 0.098106662 | -4.267503841 |
| 1417786_a_at | 0.124076666  | 9.011152926 | 1.83597      | 0.098122632 | 0.098122632 | -4.267630374 |
| 1459737_s_at | -0.324499534 | 3.976384457 | -1.835769123 | 0.098154352 | 0.098154352 | -4.267881636 |
| 1443848_at   | -0.238615244 | 5.537829569 | -1.835557418 | 0.098187792 | 0.098187792 | -4.26814643  |
| 1443267_at   | 0.428474899  | 5.608706128 | 1.83551736   | 0.09819412  | 0.09819412  | -4.268196532 |
| 1452180_at   | 0.16163676   | 6.659886548 | 1.835419555  | 0.098209574 | 0.098209574 | -4.268318859 |
| 1443973_at   | -0.184625644 | 5.371920519 | -1.83495107  | 0.098283627 | 0.098283627 | -4.268904767 |
| 1434786_at   | -0.267757145 | 6.906698572 | -1.834919221 | 0.098288663 | 0.098288663 | -4.268944596 |
| 1436026_at   | 0.227134371  | 8.938966434 | 1.834767711  | 0.098312624 | 0.098312624 | -4.269134068 |
| 1434787_at   | -0.129484752 | 7.127122728 | -1.834700873 | 0.098323196 | 0.098323196 | -4.269217651 |
| 1442222_at   | 0.134923384  | 6.533987335 | 1.834525099  | 0.098351004 | 0.098351004 | -4.269437455 |
| 1439659_at   | -0.139441029 | 6.626352797 | -1.83431369  | 0.09838446  | 0.09838446  | -4.269701809 |
| 1436004_at   | 0.151278345  | 6.637613683 | 1.834245469  | 0.098395258 | 0.098395258 | -4.269787113 |
| 1427031_s_at | -0.134775011 | 8.603462892 | -1.834141352 | 0.09841174  | 0.09841174  | -4.2699173   |
| 1418391_at   | -0.1383176   | 8.332313909 | -1.833920343 | 0.098446735 | 0.098446735 | -4.270193636 |
| 1435445_at   | 0.151058945  | 8.247429884 | 1.833875804  | 0.098453789 | 0.098453789 | -4.270249324 |
| 1432053_at   | -0.188332547 | 5.322623776 | -1.833859075 | 0.098456438 | 0.098456438 | -4.27027024  |
| 1440626_at   | -0.183099072 | 4.395296149 | -1.833572543 | 0.09850183  | 0.09850183  | -4.270628479 |
| 1437787_at   | 0.146795639  | 3.372422013 | 1.833482312  | 0.098516128 | 0.098516128 | -4.270741285 |
| 1436879_x_at | -0.818445002 | 4.004231238 | -1.833346865 | 0.098537594 | 0.098537594 | -4.270910618 |
| 1456386_at   | 0.435274111  | 7.868846995 | 1.833204235  | 0.098560204 | 0.098560204 | -4.271088926 |
| 1451363_a_at | 0.201034388  | 4.771552113 | 1.832787699  | 0.098626261 | 0.098626261 | -4.271609624 |
| 1417466_at   | 0.191509615  | 8.837588901 | 1.832657895  | 0.098646855 | 0.098646855 | -4.271771878 |
| 1439492_at   | -0.250276522 | 6.590447699 | -1.832562564 | 0.098661982 | 0.098661982 | -4.271891039 |
| 1451638_s_at | 0.145206408  | 9.355755826 | 1.83254909   | 0.09866412  | 0.09866412  | -4.271907881 |
| 1426914_at   | 0.164661515  | 5.785668722 | 1.83251924   | 0.098668857 | 0.098668857 | -4.271945191 |
| 1459436_at   | -0.132267853 | 3.751993685 | -1.832203348 | 0.098719001 | 0.098719001 | -4.272340024 |
| 1447327_at   | 0.221302788  | 4.374571724 | 1.832107361  | 0.098734242 | 0.098734242 | -4.272459993 |
| 1452067_at   | 0.199992582  | 7.231362681 | 1.831991733  | 0.098752605 | 0.098752605 | -4.272604507 |
| 1433341_at   | -0.203579845 | 3.951864267 | -1.831985604 | 0.098753579 | 0.098753579 | -4.272612167 |
| 1422842_at   | 0.199578243  | 9.025841989 | 1.831981908  | 0.098754166 | 0.098754166 | -4.272616786 |
| 1441889_x_at | 0.125741476  | 3.091468119 | 1.831848505  | 0.098775356 | 0.098775356 | -4.272783511 |
| 1457571_at   | 0.374748889  | 6.442927012 | 1.831783341  | 0.098785708 | 0.098785708 | -4.272864949 |
| 1430199_at   | 0.122193614  | 3.175318472 | 1.831760665  | 0.098789311 | 0.098789311 | -4.272893289 |
| 1452559_at   | -0.192218904 | 4.883552151 | -1.831707729 | 0.098797722 | 0.098797722 | -4.272959445 |
| 1419184_a_at | 0.179110247  | 8.168918904 | 1.831461946  | 0.098836782 | 0.098836782 | -4.273266598 |
| 1432251_at   | -0.162117377 | 3.966598674 | -1.831314382 | 0.09886024  | 0.09886024  | -4.273451    |
| 1434465_x_at | -0.205589936 | 8.581589052 | -1.831251521 | 0.098870234 | 0.098870234 | -4.273529552 |
| 1426934_at   | -0.219937094 | 8.049986507 | -1.831227405 | 0.098874069 | 0.098874069 | -4.273559688 |
| 1449868_at   | -0.208410604 | 4.547189132 | -1.831136921 | 0.098888457 | 0.098888457 | -4.273672755 |
| 1423883_at   | -0.165228077 | 8.314660716 | -1.83095162  | 0.09891793  | 0.09891793  | -4.273904298 |
| 1438580_at   | 0.172708914  | 7.52017111  | 1.830773334  | 0.098946294 | 0.098946294 | -4.274127067 |
| 1432283_at   | -0.129697684 | 4.433435221 | -1.830747928 | 0.098950336 | 0.098950336 | -4.27415881  |
| 1424008_a_at | -0.155054401 | 7.295919018 | -1.830744082 | 0.098950948 | 0.098950948 | -4.274163616 |
| 1442779_at   | -0.129032652 | 4.987545396 | -1.830558311 | 0.098980512 | 0.098980512 | -4.274395726 |
| 1447941_x_at | -0.175692647 | 5.185924493 | -1.830501867 | 0.098989497 | 0.098989497 | -4.274466249 |
| 1447414_at   | -0.129872062 | 3.482710924 | -1.830339515 | 0.099015343 | 0.099015343 | -4.274669089 |
| 1423705_at   | 0.118046039  | 7.171311694 | 1.83028019   | 0.099024789 | 0.099024789 | -4.274743207 |
| 1440060_at   | 0.121363388  | 4.671240518 | 1.830232507  | 0.099032382 | 0.099032382 | -4.274802779 |

|              |              |             |              |             |             |              |
|--------------|--------------|-------------|--------------|-------------|-------------|--------------|
| 1422948_s_at | -0.169270203 | 8.525180602 | -1.830150639 | 0.099045419 | 0.099045419 | -4.274905059 |
| 1432124_at   | 0.127884899  | 3.913310274 | 1.830010354  | 0.099067764 | 0.099067764 | -4.275080316 |
| 1457006_at   | -0.162846525 | 4.131243886 | -1.829720504 | 0.099113945 | 0.099113945 | -4.275442407 |
| 1454180_at   | -0.152914727 | 5.234065045 | -1.829707805 | 0.099115969 | 0.099115969 | -4.275458271 |
| 1447761_x_at | -0.124969783 | 3.217778214 | -1.829697521 | 0.099117608 | 0.099117608 | -4.275471118 |
| 1446321_at   | -0.124441859 | 4.222878923 | -1.829678484 | 0.099120642 | 0.099120642 | -4.275494899 |
| 1453205_at   | -0.192440968 | 3.48118744  | -1.829669048 | 0.099122146 | 0.099122146 | -4.275506685 |
| 1427119_at   | -0.15891214  | 4.612820078 | -1.829561652 | 0.099139264 | 0.099139264 | -4.275640842 |
| 1450230_at   | -0.18145624  | 5.46245108  | -1.829427759 | 0.099160609 | 0.099160609 | -4.275808092 |
| 1459473_at   | 0.126095833  | 4.082607228 | 1.829425013  | 0.099161047 | 0.099161047 | -4.275811523 |
| 1436450_at   | 0.209921906  | 6.53937112  | 1.829399461  | 0.099165121 | 0.099165121 | -4.275843441 |
| 1430929_at   | 0.163862931  | 4.617442305 | 1.829351143  | 0.099172825 | 0.099172825 | -4.275903794 |
| 1435366_at   | -0.219354295 | 7.281492549 | -1.82925705  | 0.099187829 | 0.099187829 | -4.276021325 |
| 1440035_at   | -0.176990335 | 5.230056422 | -1.829043764 | 0.099221848 | 0.099221848 | -4.276287729 |
| 1458595_at   | -0.126064964 | 4.100303063 | -1.828954887 | 0.099236027 | 0.099236027 | -4.276398737 |
| 1447539_at   | -0.178120456 | 3.836483084 | -1.828932205 | 0.099239646 | 0.099239646 | -4.276427067 |
| 1427175_at   | 0.140932366  | 5.911838143 | 1.828838977  | 0.099254522 | 0.099254522 | -4.276543507 |
| 1438819_at   | 0.198060084  | 3.962181815 | 1.8286794    | 0.099279989 | 0.099279989 | -4.276742809 |
| 1444198_at   | -0.460033504 | 4.881484407 | -1.828593747 | 0.099293662 | 0.099293662 | -4.276849782 |
| 1437913_at   | 0.131385133  | 3.759430016 | 1.828575407  | 0.099296589 | 0.099296589 | -4.276872687 |
| 1423289_a_at | 0.108336113  | 7.476173061 | 1.828358301  | 0.099331253 | 0.099331253 | -4.277143823 |
| 1441010_at   | -0.191341682 | 4.471417827 | -1.828276762 | 0.099344275 | 0.099344275 | -4.277245651 |
| 1459886_at   | 0.206947766  | 5.429854339 | 1.828183384  | 0.099359189 | 0.099359189 | -4.277362262 |
| 1442824_at   | 0.431693998  | 5.526721014 | 1.827947768  | 0.099396831 | 0.099396831 | -4.277656489 |
| 1425512_at   | -0.134333096 | 8.16234592  | -1.827883135 | 0.099407159 | 0.099407159 | -4.277737197 |
| 1458342_at   | -0.153655931 | 5.496594574 | -1.827880648 | 0.099407556 | 0.099407556 | -4.277740303 |
| 1444750_at   | -0.155431194 | 5.904422868 | -1.827862256 | 0.099410495 | 0.099410495 | -4.277763269 |
| 1419142_at   | -0.133898705 | 3.438987198 | -1.827164258 | 0.099522098 | 0.099522098 | -4.278634797 |
| 1446654_at   | -0.193580484 | 4.457892467 | -1.826993799 | 0.099549371 | 0.099549371 | -4.278847615 |
| 1442584_at   | -0.148097009 | 4.098941109 | -1.826823668 | 0.099576597 | 0.099576597 | -4.279060014 |
| 1442501_at   | -0.14816144  | 3.659240232 | -1.826785009 | 0.099582785 | 0.099582785 | -4.279108277 |
| 1457839_at   | 0.224615733  | 5.63628196  | 1.826721425  | 0.099592963 | 0.099592963 | -4.279187656 |
| 1456283_at   | 0.175720679  | 3.934962763 | 1.826660485  | 0.099602719 | 0.099602719 | -4.279263733 |
| 1458550_at   | -0.157314303 | 7.264501526 | -1.826377698 | 0.099648001 | 0.099648001 | -4.279616749 |
| 1432240_at   | -0.144190884 | 4.068902913 | -1.826139268 | 0.099686195 | 0.099686195 | -4.279914375 |
| 1457289_at   | 0.1858786    | 3.906482501 | 1.82573522   | 0.09975095  | 0.09975095  | -4.280418704 |
| 1446659_at   | 0.139514011  | 3.418091473 | 1.825644682  | 0.099765466 | 0.099765466 | -4.280531707 |
| 1415929_at   | 0.118180069  | 10.34665436 | 1.825512416  | 0.099786675 | 0.099786675 | -4.280696787 |
| 1442526_at   | -0.15740744  | 3.844844307 | -1.825476144 | 0.099792492 | 0.099792492 | -4.280742057 |
| 1433159_at   | 0.198635634  | 4.64500843  | 1.824927965  | 0.099880443 | 0.099880443 | -4.281426182 |
| 1451200_at   | 0.262823013  | 8.788923566 | 1.824811875  | 0.099899078 | 0.099899078 | -4.281571051 |
| 1421145_at   | -0.153412033 | 5.927055636 | -1.824699085 | 0.099917187 | 0.099917187 | -4.281711797 |
| 1431606_a_at | 0.145503269  | 7.673490951 | 1.824309885  | 0.099979696 | 0.099979696 | -4.282197444 |
| 1442276_at   | -0.209365382 | 7.652057053 | -1.824144121 | 0.10000633  | 0.10000633  | -4.282404273 |
| 1447071_at   | 0.127078642  | 7.361740672 | 1.82394394   | 0.100038503 | 0.100038503 | -4.282654035 |
| 1431053_at   | -0.309893608 | 5.728541653 | -1.823932392 | 0.100040359 | 0.100040359 | -4.282668443 |
| 1428899_at   | -0.319205596 | 4.598148445 | -1.82373692  | 0.100071785 | 0.100071785 | -4.28291232  |
| 1434202_a_at | -0.386376496 | 4.688122861 | -1.823736375 | 0.100071873 | 0.100071873 | -4.282913    |
| 1421393_at   | -0.17048379  | 5.575496258 | -1.823720877 | 0.100074365 | 0.100074365 | -4.282932335 |
| 1419331_at   | 0.145208121  | 4.535629808 | 1.823666547  | 0.100083101 | 0.100083101 | -4.283000116 |
| 1435887_at   | -0.186641395 | 6.24141576  | -1.823651579 | 0.100085508 | 0.100085508 | -4.283018791 |
| 1422479_at   | 0.192743843  | 6.803364806 | 1.823547933  | 0.100102177 | 0.100102177 | -4.283148095 |
| 1442329_at   | -0.137063194 | 4.87668348  | -1.823543517 | 0.100102888 | 0.100102888 | -4.283153605 |

|              |              |             |              |             |             |              |
|--------------|--------------|-------------|--------------|-------------|-------------|--------------|
| 1420401_a_at | 0.213802517  | 6.766551874 | 1.823080761  | 0.100177343 | 0.100177343 | -4.283730886 |
| 1447485_at   | -0.144090225 | 3.975596096 | -1.822766562 | 0.100227925 | 0.100227925 | -4.284122812 |
| 1440879_at   | -0.16078702  | 7.882678853 | -1.822527489 | 0.100266429 | 0.100266429 | -4.28442101  |
| 1417978_at   | 0.167436488  | 8.334590742 | 1.822501016  | 0.100270693 | 0.100270693 | -4.284454029 |
| 1420856_a_at | 0.158915194  | 6.988587462 | 1.82236858   | 0.10029203  | 0.10029203  | -4.284619211 |
| 1419168_at   | -0.143566128 | 7.751641139 | -1.82235887  | 0.100293594 | 0.100293594 | -4.284631321 |
| 1458611_at   | 0.138911765  | 4.808082187 | 1.822335434  | 0.10029737  | 0.10029737  | -4.284660551 |
| 1418959_at   | -0.133241225 | 4.84269627  | -1.822232437 | 0.100313967 | 0.100313967 | -4.28478901  |
| 1422342_at   | -0.346940379 | 5.914311745 | -1.822197772 | 0.100319554 | 0.100319554 | -4.284832244 |
| 1437572_at   | -0.117122845 | 6.949976818 | -1.821952789 | 0.100359043 | 0.100359043 | -4.285137775 |
| 1452952_at   | 0.151862106  | 7.393293729 | 1.821565635  | 0.100421479 | 0.100421479 | -4.285620584 |
| 1417379_at   | 0.206355752  | 10.47317793 | 1.821543891  | 0.100424986 | 0.100424986 | -4.285647698 |
| 1450109_s_at | -0.134160624 | 3.355483301 | -1.821283222 | 0.100467045 | 0.100467045 | -4.285972746 |
| 1415987_at   | -0.153643285 | 10.34591954 | -1.821204545 | 0.100479743 | 0.100479743 | -4.286070851 |
| 1450314_at   | 0.131133105  | 4.230477913 | 1.8210739    | 0.100500832 | 0.100500832 | -4.286233753 |
| 1424590_at   | -0.154755569 | 7.126194906 | -1.820760815 | 0.100551385 | 0.100551385 | -4.28662412  |
| 1447201_at   | 0.188646141  | 4.083122128 | 1.820732901  | 0.100555894 | 0.100555894 | -4.286658923 |
| 1451409_at   | 0.169465346  | 7.097365698 | 1.820658519  | 0.100567908 | 0.100567908 | -4.286751661 |
| 1429547_at   | -0.137903251 | 3.482589754 | -1.820450444 | 0.100601524 | 0.100601524 | -4.287011077 |
| 1458628_at   | -0.122328704 | 5.738831137 | -1.820296477 | 0.100626406 | 0.100626406 | -4.287203028 |
| 1453278_a_at | -0.12657517  | 8.211515486 | -1.820077163 | 0.100661857 | 0.100661857 | -4.287476434 |
| 1431317_at   | -0.317050329 | 4.857180713 | -1.820015757 | 0.100671785 | 0.100671785 | -4.287552983 |
| 1444352_at   | 0.185257494  | 5.376231259 | 1.819558722  | 0.100745707 | 0.100745707 | -4.288122694 |
| 1425556_at   | 0.196935515  | 6.204302941 | 1.819315773  | 0.100785022 | 0.100785022 | -4.288425516 |
| 1455844_at   | -0.191784665 | 4.968861909 | -1.819282331 | 0.100790435 | 0.100790435 | -4.288467199 |
| 1440732_at   | -0.11715474  | 4.854734206 | -1.819101923 | 0.100819641 | 0.100819641 | -4.288692055 |
| 1449341_a_at | -0.126053084 | 6.38241679  | -1.818952908 | 0.10084377  | 0.10084377  | -4.288877777 |
| 1451667_at   | 0.128330622  | 7.302333856 | 1.818756599  | 0.100875565 | 0.100875565 | -4.289122434 |
| 1449072_a_at | 0.120867239  | 8.894992774 | 1.818738079  | 0.100878566 | 0.100878566 | -4.289145515 |
| 1452277_at   | -0.151267288 | 3.550554897 | -1.818362219 | 0.10093947  | 0.10093947  | -4.289613913 |
| 1435244_at   | -0.201953832 | 6.895107074 | -1.818286054 | 0.100951816 | 0.100951816 | -4.289708826 |
| 1422246_at   | -0.155870933 | 3.966256565 | -1.817990572 | 0.100999725 | 0.100999725 | -4.290077023 |
| 1443713_at   | -0.141241186 | 3.195583344 | -1.817979141 | 0.101001579 | 0.101001579 | -4.290091266 |
| 1424851_at   | -0.128141588 | 6.665820762 | -1.817879571 | 0.101017728 | 0.101017728 | -4.290215334 |
| 1444795_at   | -0.126154654 | 3.960016645 | -1.817814477 | 0.101028287 | 0.101028287 | -4.290296442 |
| 1457302_at   | 0.199863008  | 7.399676516 | 1.817805592  | 0.101029729 | 0.101029729 | -4.290307513 |
| 1447318_at   | -0.137926794 | 3.356241794 | -1.817485769 | 0.101081623 | 0.101081623 | -4.290705999 |
| 1431539_at   | -0.173959864 | 3.990347018 | -1.817276937 | 0.101115521 | 0.101115521 | -4.29096618  |
| 1431073_at   | 0.268993831  | 5.809517614 | 1.817255875  | 0.10111894  | 0.10111894  | -4.29099242  |
| 1437639_at   | -0.13329315  | 7.286221499 | -1.816818576 | 0.10118996  | 0.10118996  | -4.291537204 |
| 1455026_at   | 0.124848999  | 8.018551289 | 1.816682299  | 0.101212102 | 0.101212102 | -4.291706967 |
| 1434345_at   | -0.136655904 | 4.453318087 | -1.816616351 | 0.101222818 | 0.101222818 | -4.291789117 |
| 1420337_at   | 0.176687083  | 3.522278874 | 1.816295203  | 0.101275019 | 0.101275019 | -4.292189149 |
| 1439604_at   | 0.180464386  | 6.876064337 | 1.81626312   | 0.101280236 | 0.101280236 | -4.292229112 |
| 1421986_at   | -0.129052756 | 6.625351982 | -1.816250455 | 0.101282295 | 0.101282295 | -4.292244887 |
| 1445321_at   | 0.210148351  | 6.02258845  | 1.816250286  | 0.101282322 | 0.101282322 | -4.292245098 |
| 1449807_x_at | 0.119999242  | 3.607470127 | 1.816231555  | 0.101285368 | 0.101285368 | -4.292268429 |
| 1439199_at   | -0.122216017 | 5.904013881 | -1.815782491 | 0.10135841  | 0.10135841  | -4.292827744 |
| 1435102_a_at | 0.127973727  | 7.633219892 | 1.81575554   | 0.101362796 | 0.101362796 | -4.29286131  |
| 1421949_a_at | 0.179073907  | 6.566273161 | 1.815715387  | 0.101369329 | 0.101369329 | -4.292911318 |
| 1436780_at   | -0.237466777 | 7.70213566  | -1.815687488 | 0.101373869 | 0.101373869 | -4.292946064 |
| 1447421_at   | 0.251244828  | 7.516149012 | 1.81527186   | 0.101441526 | 0.101441526 | -4.293463675 |
| 1439289_s_at | -0.199027489 | 4.646056698 | -1.815259113 | 0.101443602 | 0.101443602 | -4.293479549 |

|              |              |             |              |             |             |              |
|--------------|--------------|-------------|--------------|-------------|-------------|--------------|
| 1445787_at   | -0.272822359 | 5.442822751 | -1.815127121 | 0.101465097 | 0.101465097 | -4.293643917 |
| 1447404_at   | 0.204115349  | 5.098512232 | 1.814858131  | 0.101508915 | 0.101508915 | -4.293978874 |
| 1451602_at   | 0.250500492  | 7.352365023 | 1.81485448   | 0.10150951  | 0.10150951  | -4.29398342  |
| 1421912_at   | -0.178569944 | 4.87949933  | -1.814818482 | 0.101515376 | 0.101515376 | -4.294028244 |
| 1431340_a_at | 0.165190754  | 5.630906365 | 1.814723012  | 0.101530933 | 0.101530933 | -4.294147122 |
| 1421460_at   | 0.133100331  | 3.526591724 | 1.814633856  | 0.101545463 | 0.101545463 | -4.294258134 |
| 1436176_at   | 0.153894831  | 4.097537723 | 1.814592935  | 0.101552133 | 0.101552133 | -4.294309086 |
| 1445262_at   | -0.155614236 | 3.928804859 | -1.814404273 | 0.101582889 | 0.101582889 | -4.294543989 |
| 1416493_at   | -0.146132201 | 11.29416539 | -1.81435684  | 0.101590623 | 0.101590623 | -4.294603047 |
| 1427153_at   | -0.135858934 | 9.441672324 | -1.814324488 | 0.101595898 | 0.101595898 | -4.294643328 |
| 1441398_at   | -0.161132652 | 4.16929194  | -1.814271329 | 0.101604566 | 0.101604566 | -4.294709513 |
| 1448117_at   | -0.183972683 | 7.597074258 | -1.814230899 | 0.10161116  | 0.10161116  | -4.29475985  |
| 1447596_at   | -0.140912953 | 3.517607367 | -1.814183777 | 0.101618845 | 0.101618845 | -4.294818518 |
| 1435555_at   | -0.178782717 | 7.238473942 | -1.8140163   | 0.101646163 | 0.101646163 | -4.295027026 |
| 1439097_at   | 0.15825729   | 6.637895402 | 1.813970793  | 0.101653587 | 0.101653587 | -4.29508368  |
| 1439890_at   | -0.190153894 | 5.782983483 | -1.813823715 | 0.101677585 | 0.101677585 | -4.295266783 |
| 1427888_a_at | 0.1190085    | 10.7350188  | 1.813521243  | 0.101726955 | 0.101726955 | -4.295643323 |
| 1458494_at   | -0.161095967 | 4.038778078 | -1.813058365 | 0.101802549 | 0.101802549 | -4.296219502 |
| 1422722_at   | -0.19773332  | 5.144298765 | -1.81302213  | 0.101808469 | 0.101808469 | -4.296264604 |
| 1420890_at   | 0.153392596  | 8.949504781 | 1.812882374  | 0.101831304 | 0.101831304 | -4.296438555 |
| 1443814_x_at | -0.425784427 | 7.306444877 | -1.81273276  | 0.101855756 | 0.101855756 | -4.296624772 |
| 1435106_at   | 0.296019517  | 7.751573838 | 1.812676631  | 0.10186493  | 0.10186493  | -4.29669463  |
| 1420219_at   | -0.15180581  | 5.174659124 | -1.812508475 | 0.101892421 | 0.101892421 | -4.296903914 |
| 1450455_s_at | -0.136045388 | 3.790021477 | -1.812458891 | 0.101900528 | 0.101900528 | -4.296965624 |
| 1433626_at   | 0.22569346   | 6.829619278 | 1.812196935  | 0.10194337  | 0.10194337  | -4.297291631 |
| 1424758_s_at | 0.139017711  | 4.754351085 | 1.812071047  | 0.101963965 | 0.101963965 | -4.297448293 |
| 1416801_at   | 0.208704382  | 6.604246437 | 1.812063434  | 0.10196521  | 0.10196521  | -4.297457767 |
| 1437929_at   | -0.141519496 | 6.204636327 | -1.812060453 | 0.101965698 | 0.101965698 | -4.297461477 |
| 1426093_at   | -0.145708972 | 4.166515032 | -1.812038091 | 0.101969357 | 0.101969357 | -4.297489305 |
| 1429666_at   | -0.162464689 | 5.2321265   | -1.811924612 | 0.101987926 | 0.101987926 | -4.29763052  |
| 1418405_at   | 0.138774416  | 4.161094438 | 1.811760842  | 0.102014729 | 0.102014729 | -4.297834311 |
| 1440658_at   | -0.235200029 | 5.589187727 | -1.811646711 | 0.102033412 | 0.102033412 | -4.297976329 |
| 1455280_at   | 0.210544452  | 8.936544838 | 1.811491004  | 0.102058906 | 0.102058906 | -4.298170076 |
| 1446463_at   | -0.205999204 | 5.928928346 | -1.811401667 | 0.102073536 | 0.102073536 | -4.298281235 |
| 1448012_at   | -0.553775435 | 5.125316763 | -1.811327907 | 0.102085617 | 0.102085617 | -4.298373011 |
| 1454060_a_at | 0.153371135  | 9.484602268 | 1.81113026   | 0.102117994 | 0.102117994 | -4.298618925 |
| 1417852_x_at | 0.299109142  | 5.090986415 | 1.811056029  | 0.102130156 | 0.102130156 | -4.298711281 |
| 1439262_x_at | 0.17544855   | 5.189607452 | 1.810886415  | 0.102157952 | 0.102157952 | -4.298922304 |
| 1451997_at   | 0.112399605  | 8.091341624 | 1.810760976  | 0.102178513 | 0.102178513 | -4.299078363 |
| 1430652_at   | -0.140490727 | 4.660353424 | -1.810708782 | 0.10218707  | 0.10218707  | -4.299143295 |
| 1422311_a_at | -0.127717589 | 6.591529693 | -1.810593139 | 0.10220603  | 0.10220603  | -4.299287161 |
| 1422915_at   | -0.172749669 | 4.663129888 | -1.810577836 | 0.102208539 | 0.102208539 | -4.299306199 |
| 1452092_at   | 0.165853117  | 9.049456093 | 1.810138564  | 0.102280591 | 0.102280591 | -4.299852641 |
| 1457161_at   | -0.139043702 | 8.995232607 | -1.810060509 | 0.102293399 | 0.102293399 | -4.299949733 |
| 1436617_at   | -0.243234185 | 7.984026704 | -1.809733408 | 0.102347089 | 0.102347089 | -4.300356596 |
| 1436660_at   | -0.133509878 | 8.191964283 | -1.809455213 | 0.102392772 | 0.102392772 | -4.300702605 |
| 1422112_at   | -0.141719374 | 4.110071374 | -1.809251477 | 0.10242624  | 0.10242624  | -4.300955989 |
| 1457987_at   | 0.324629482  | 4.788483532 | 1.809154021  | 0.102442253 | 0.102442253 | -4.301077192 |
| 1432411_a_at | 0.120654478  | 7.198702857 | 1.809146937  | 0.102443417 | 0.102443417 | -4.301086001 |
| 1442496_at   | 0.145021156  | 4.396531996 | 1.809014955  | 0.102465106 | 0.102465106 | -4.301250137 |
| 1420893_a_at | 0.222333064  | 5.964827351 | 1.808919864  | 0.102480736 | 0.102480736 | -4.30136839  |
| 1457349_at   | -0.306870398 | 6.766803832 | -1.808845227 | 0.102493005 | 0.102493005 | -4.301461206 |
| 1455659_at   | 0.1783903    | 7.020934937 | 1.80869714   | 0.102517353 | 0.102517353 | -4.301645358 |

|              |              |             |              |             |             |              |
|--------------|--------------|-------------|--------------|-------------|-------------|--------------|
| 1429381_x_at | -0.144657044 | 5.960366722 | -1.808502645 | 0.102549338 | 0.102549338 | -4.30188721  |
| 1419428_a_at | -0.164003128 | 8.992678798 | -1.808390557 | 0.102567776 | 0.102567776 | -4.302026585 |
| 1429458_at   | 0.118159438  | 10.11681403 | 1.808076831  | 0.102619398 | 0.102619398 | -4.302416668 |
| 1424296_at   | 0.176280773  | 8.452759519 | 1.808028831  | 0.102627298 | 0.102627298 | -4.302476349 |
| 1418453_a_at | -0.125436604 | 7.708137415 | -1.807868197 | 0.102653741 | 0.102653741 | -4.302676067 |
| 1431374_at   | 0.179477267  | 5.36085561  | 1.807562411  | 0.102704095 | 0.102704095 | -4.303056233 |
| 1441587_at   | -0.144477187 | 5.400924346 | -1.80742707  | 0.102726389 | 0.102726389 | -4.303224486 |
| 1443160_at   | 0.593817708  | 6.048437324 | 1.807412994  | 0.102728707 | 0.102728707 | -4.303241985 |
| 1441490_at   | -0.134605746 | 6.732767978 | -1.80723788  | 0.10275756  | 0.10275756  | -4.303459676 |
| 1438303_at   | 0.126581325  | 6.550564895 | 1.807222109  | 0.102760159 | 0.102760159 | -4.303479281 |
| 1434917_at   | 0.179514567  | 7.053633926 | 1.80721649   | 0.102761085 | 0.102761085 | -4.303486266 |
| 1448139_at   | -0.154798314 | 3.876590273 | -1.807202491 | 0.102763392 | 0.102763392 | -4.303503668 |
| 1430175_at   | -0.142808546 | 7.612653291 | -1.807137187 | 0.102774155 | 0.102774155 | -4.303584847 |
| 1416601_a_at | 0.186111263  | 6.95800315  | 1.806996621  | 0.102797324 | 0.102797324 | -4.303759581 |
| 1418953_at   | -0.134901086 | 5.747588715 | -1.806925654 | 0.102809023 | 0.102809023 | -4.303847795 |
| 1420981_a_at | 0.180751868  | 10.22987062 | 1.806910662  | 0.102811495 | 0.102811495 | -4.303866431 |
| 1434475_at   | 0.18047158   | 8.834222329 | 1.806907801  | 0.102811967 | 0.102811967 | -4.303869987 |
| 1419843_at   | 0.169208935  | 3.772366613 | 1.806887845  | 0.102815257 | 0.102815257 | -4.303894792 |
| 1429028_at   | 0.133242093  | 9.49877775  | 1.806705613  | 0.102845306 | 0.102845306 | -4.304121305 |
| 1431853_at   | -0.17360062  | 4.270931847 | -1.806312522 | 0.102910153 | 0.102910153 | -4.304609883 |
| 1425921_a_at | -0.16595527  | 9.262154598 | -1.806239731 | 0.102922165 | 0.102922165 | -4.30470035  |
| 1452357_at   | -0.169655944 | 8.324642232 | -1.80621275  | 0.102926618 | 0.102926618 | -4.304733883 |
| 1437314_a_at | 0.137917565  | 7.704381551 | 1.806209842  | 0.102927098 | 0.102927098 | -4.304737498 |
| 1421127_at   | -0.145275026 | 7.697734843 | -1.805666291 | 0.103016841 | 0.103016841 | -4.305412997 |
| 1456963_at   | -0.204281362 | 4.16991787  | -1.805567537 | 0.103033154 | 0.103033154 | -4.305535716 |
| 1419207_at   | 0.17710892   | 7.771705773 | 1.80552769   | 0.103039737 | 0.103039737 | -4.305585232 |
| 1427187_at   | -0.129967492 | 6.876712603 | -1.80552659  | 0.103039918 | 0.103039918 | -4.305586598 |
| 1420936_s_at | 0.125048254  | 7.276809506 | 1.805515416  | 0.103041764 | 0.103041764 | -4.305600484 |
| 1446560_at   | -0.123636357 | 4.679071142 | -1.805351399 | 0.103068865 | 0.103068865 | -4.305804294 |
| 1459162_at   | 0.161050886  | 3.562013392 | 1.805296538  | 0.103077931 | 0.103077931 | -4.305872463 |
| 1422937_at   | -0.1850785   | 4.328511946 | -1.805292874 | 0.103078536 | 0.103078536 | -4.305877016 |
| 1444716_at   | 0.122109851  | 7.506486347 | 1.805208464  | 0.103092487 | 0.103092487 | -4.305981901 |
| 1424579_at   | -0.189848682 | 6.090989402 | -1.80516788  | 0.103099195 | 0.103099195 | -4.306032329 |
| 1431066_at   | 0.191752082  | 7.637301606 | 1.804987238  | 0.103129058 | 0.103129058 | -4.306256778 |
| 1440403_at   | 0.140247185  | 6.592661926 | 1.804596825  | 0.103193627 | 0.103193627 | -4.306741842 |
| 1453561_x_at | 0.138274147  | 3.247690132 | 1.804111054  | 0.10327402  | 0.10327402  | -4.307345324 |
| 1457377_at   | 0.144166951  | 7.752371814 | 1.803903748  | 0.103308345 | 0.103308345 | -4.307602843 |
| 1453310_at   | -0.438924047 | 4.88044793  | -1.803891965 | 0.103310297 | 0.103310297 | -4.30761748  |
| 1431385_a_at | 0.198883536  | 7.412698074 | 1.803824801  | 0.10332142  | 0.10332142  | -4.30770091  |
| 1454396_at   | 0.21071487   | 4.383835343 | 1.803679923  | 0.103345418 | 0.103345418 | -4.30788087  |
| 1448789_at   | 0.257882057  | 6.75387425  | 1.803587598  | 0.103360714 | 0.103360714 | -4.307995548 |
| 1455626_at   | 0.15334298   | 3.53603091  | 1.803585048  | 0.103361136 | 0.103361136 | -4.307998716 |
| 1436656_at   | -0.1823465   | 4.898358069 | -1.803570078 | 0.103363616 | 0.103363616 | -4.30801731  |
| 1429072_at   | -0.177142632 | 5.070388154 | -1.803565453 | 0.103364383 | 0.103364383 | -4.308023054 |
| 1438107_x_at | 0.122014815  | 6.350809511 | 1.803481047  | 0.103378369 | 0.103378369 | -4.308127894 |
| 1432075_a_at | -0.53907643  | 7.456873457 | -1.803397348 | 0.103392239 | 0.103392239 | -4.308231853 |
| 1415894_at   | 0.192161137  | 7.580128816 | 1.803377309  | 0.10339556  | 0.10339556  | -4.308256743 |
| 1446595_at   | -0.267579758 | 4.737821913 | -1.803047655 | 0.103450208 | 0.103450208 | -4.308666173 |
| 1428807_at   | 0.176741931  | 3.347328834 | 1.802999985  | 0.103458113 | 0.103458113 | -4.308725376 |
| 1433996_at   | 0.133784466  | 6.552741386 | 1.802980477  | 0.103461348 | 0.103461348 | -4.308749605 |
| 1446736_at   | 0.142744596  | 6.770919568 | 1.802906306  | 0.103473648 | 0.103473648 | -4.308841718 |
| 1430741_at   | -0.15521492  | 4.573061715 | -1.802874662 | 0.103478897 | 0.103478897 | -4.308881019 |
| 1416360_at   | 0.145089207  | 7.83236028  | 1.802572037  | 0.103529101 | 0.103529101 | -4.309256836 |



|              |              |             |              |             |             |              |
|--------------|--------------|-------------|--------------|-------------|-------------|--------------|
| 1456126_at   | 0.20751008   | 6.429366657 | 1.80239908   | 0.103557803 | 0.103557803 | -4.309471615 |
| 1437705_at   | 0.174519763  | 6.310915198 | 1.80231187   | 0.103572279 | 0.103572279 | -4.309579909 |
| 1434049_at   | -0.189223163 | 7.703803485 | -1.802211726 | 0.103588904 | 0.103588904 | -4.309704261 |
| 1425577_at   | 0.127563423  | 9.237038078 | 1.802208223  | 0.103589485 | 0.103589485 | -4.309708611 |
| 1434788_at   | 0.18529563   | 8.92276854  | 1.80211761   | 0.10360453  | 0.10360453  | -4.309821126 |
| 1436346_at   | -0.14314311  | 8.351514662 | -1.802060113 | 0.103614078 | 0.103614078 | -4.309892519 |
| 1442562_at   | 0.12324738   | 7.030407273 | 1.801906773  | 0.103639544 | 0.103639544 | -4.310082915 |
| 1417543_at   | 0.159516866  | 6.079757893 | 1.801838225  | 0.10365093  | 0.10365093  | -4.310168026 |
| 1458686_at   | 0.144998926  | 4.26255017  | 1.801776001  | 0.103661266 | 0.103661266 | -4.310245284 |
| 1459297_at   | -0.136935781 | 4.505132281 | -1.801744508 | 0.103666498 | 0.103666498 | -4.310284386 |
| 1421397_a_at | -0.15811593  | 7.27060369  | -1.801721887 | 0.103670257 | 0.103670257 | -4.310312472 |
| 1456773_at   | 0.169809258  | 6.151813879 | 1.801511733  | 0.103705177 | 0.103705177 | -4.310573339 |
| 1448183_a_at | 0.178379405  | 8.027163481 | 1.801506989  | 0.103705966 | 0.103705966 | -4.310579279 |
| 1453841_at   | 0.243356596  | 7.382090811 | 1.801485119  | 0.103709601 | 0.103709601 | -4.310606432 |
| 1443337_at   | 0.178422584  | 7.955453021 | 1.801170337  | 0.103761929 | 0.103761929 | -4.310997226 |
| 1431959_x_at | 0.148276518  | 3.907338323 | 1.801150718  | 0.103765191 | 0.103765191 | -4.311021581 |
| 1416707_a_at | -0.154144162 | 6.698446963 | -1.800931868 | 0.103801588 | 0.103801588 | -4.311293261 |
| 1440990_at   | 0.171976484  | 8.858062446 | 1.800805806  | 0.103822559 | 0.103822559 | -4.311449748 |
| 1430927_at   | -0.163523312 | 4.738471248 | -1.800783379 | 0.10382629  | 0.10382629  | -4.311477586 |
| 1431230_a_at | 0.115237044  | 7.557828701 | 1.800262049  | 0.103913058 | 0.103913058 | -4.312124688 |
| 1415795_at   | 0.118754556  | 7.785090007 | 1.800221607  | 0.103919792 | 0.103919792 | -4.312174885 |
| 1451255_at   | 0.164513056  | 7.991212552 | 1.800087196  | 0.103942175 | 0.103942175 | -4.312341708 |
| 1455192_at   | 0.144976605  | 5.583537561 | 1.799922544  | 0.1039696   | 0.1039696   | -4.312546059 |
| 1454567_at   | 0.124589473  | 3.942570716 | 1.79980274   | 0.103989559 | 0.103989559 | -4.312694743 |
| 1436413_at   | 0.353095772  | 5.879579193 | 1.799548144  | 0.104031987 | 0.104031987 | -4.313010702 |
| 1434776_at   | -0.145489649 | 8.376065575 | -1.799434338 | 0.104050957 | 0.104050957 | -4.31315193  |
| 1433691_at   | -0.116970202 | 8.828386298 | -1.799315124 | 0.104070833 | 0.104070833 | -4.313299867 |
| 1434121_at   | 0.152820999  | 5.25554857  | 1.799248694  | 0.104081909 | 0.104081909 | -4.3133823   |
| 1457731_at   | 0.180747362  | 7.057227274 | 1.79916003   | 0.104096695 | 0.104096695 | -4.313492322 |
| 1424850_at   | 0.121541815  | 5.951802546 | 1.799020026  | 0.104120046 | 0.104120046 | -4.313666046 |
| 1436494_x_at | 0.128758031  | 7.654428742 | 1.798777469  | 0.104160514 | 0.104160514 | -4.31396701  |
| 1426669_at   | -0.173287402 | 7.423525868 | -1.798698002 | 0.104173775 | 0.104173775 | -4.31406561  |
| 1437344_x_at | -0.16054303  | 4.208800885 | -1.798676752 | 0.104177322 | 0.104177322 | -4.314091976 |
| 1452862_at   | -0.157185065 | 7.219513225 | -1.798471056 | 0.104211656 | 0.104211656 | -4.314347183 |
| 1449264_at   | 0.394398734  | 6.538115322 | 1.798339676  | 0.104233591 | 0.104233591 | -4.314510181 |
| 1459617_at   | 0.204380121  | 6.920739836 | 1.798325228  | 0.104236003 | 0.104236003 | -4.314528107 |
| 1429691_at   | 0.19974609   | 7.906144817 | 1.797789884  | 0.10432543  | 0.10432543  | -4.315192235 |
| 1449530_at   | 0.163146369  | 9.2301735   | 1.797696402  | 0.104341053 | 0.104341053 | -4.315308197 |
| 1428115_a_at | 0.166071508  | 6.850220003 | 1.797209647  | 0.104422436 | 0.104422436 | -4.315911965 |
| 1428118_at   | -0.150497312 | 7.23864029  | -1.797128414 | 0.104436023 | 0.104436023 | -4.31601272  |
| 1429798_s_at | -0.121453527 | 5.995816699 | -1.796981461 | 0.104460608 | 0.104460608 | -4.316194983 |
| 1424122_s_at | -0.111259184 | 9.858818353 | -1.796935017 | 0.104468378 | 0.104468378 | -4.316252585 |
| 1431485_at   | -0.14170773  | 6.340921342 | -1.796881748 | 0.104477292 | 0.104477292 | -4.316318652 |
| 1418829_a_at | -0.204960892 | 6.997847395 | -1.796802389 | 0.104490572 | 0.104490572 | -4.316417074 |
| 1450705_at   | -0.145201116 | 9.134141636 | -1.796786089 | 0.1044933   | 0.1044933   | -4.31643729  |
| 1453931_at   | 0.247749116  | 6.225814488 | 1.796636813  | 0.104518286 | 0.104518286 | -4.31662242  |
| 1442546_at   | -0.255532019 | 3.494126205 | -1.796528057 | 0.104536493 | 0.104536493 | -4.316757294 |
| 1434436_at   | -0.124158495 | 7.789320297 | -1.796503685 | 0.104540573 | 0.104540573 | -4.316787518 |
| 1443979_at   | 0.131725944  | 3.839840429 | 1.796498591  | 0.104541426 | 0.104541426 | -4.316793836 |
| 1419741_at   | -0.131170411 | 10.93716614 | -1.796462461 | 0.104547476 | 0.104547476 | -4.316838641 |
| 1436047_at   | -0.176828172 | 7.664468885 | -1.796323014 | 0.104570827 | 0.104570827 | -4.317011569 |
| 1420752_at   | -0.168051676 | 9.02478863  | -1.796135233 | 0.10460228  | 0.10460228  | -4.317244428 |
| 1428490_at   | -0.220672139 | 7.715404995 | -1.796072343 | 0.104612816 | 0.104612816 | -4.317322412 |

|              |              |             |              |             |             |              |
|--------------|--------------|-------------|--------------|-------------|-------------|--------------|
| 1456937_at   | -0.181849226 | 4.651463604 | -1.795952762 | 0.104632852 | 0.104632852 | -4.317470691 |
| 1437892_at   | 0.261219986  | 9.122959777 | 1.795905359  | 0.104640795 | 0.104640795 | -4.317529469 |
| 1448080_at   | -0.12603715  | 5.101187196 | -1.795868918 | 0.104646902 | 0.104646902 | -4.317574654 |
| 1430954_at   | -0.140845551 | 4.048426386 | -1.795863958 | 0.104647733 | 0.104647733 | -4.317580804 |
| 1446355_at   | 0.14871792   | 4.118934091 | 1.795724161  | 0.104671164 | 0.104671164 | -4.317754142 |
| 1443693_at   | -0.143022126 | 3.679409742 | -1.79569847  | 0.104675471 | 0.104675471 | -4.317785998 |
| 1455973_at   | -0.215321465 | 3.416147035 | -1.79569275  | 0.10467643  | 0.10467643  | -4.317793089 |
| 1432601_at   | 0.130845072  | 4.02312143  | 1.795282351  | 0.104745246 | 0.104745246 | -4.31830192  |
| 1439979_at   | -0.140568805 | 6.835102592 | -1.795200345 | 0.104759002 | 0.104759002 | -4.318403589 |
| 1434584_a_at | 0.130110889  | 3.322339215 | 1.795069936  | 0.104780881 | 0.104780881 | -4.318565263 |
| 1440385_at   | 0.122142987  | 4.822427532 | 1.795024035  | 0.104788582 | 0.104788582 | -4.318622167 |
| 1456711_at   | -0.327606682 | 5.076408091 | -1.794735005 | 0.104837091 | 0.104837091 | -4.318980469 |
| 1416289_at   | -0.159810462 | 8.726095449 | -1.794719828 | 0.104839639 | 0.104839639 | -4.318999283 |
| 1445140_at   | -0.224840074 | 3.661552967 | -1.794604376 | 0.104859022 | 0.104859022 | -4.319142399 |
| 1450085_at   | -0.153267927 | 7.599638857 | -1.794528599 | 0.104871745 | 0.104871745 | -4.319236331 |
| 1448737_at   | -0.119462263 | 9.462851719 | -1.79452059  | 0.10487309  | 0.10487309  | -4.319246258 |
| 1457280_at   | -0.146957844 | 5.672775344 | -1.794489769 | 0.104878266 | 0.104878266 | -4.319284464 |
| 1427505_a_at | -0.151870482 | 6.411449189 | -1.794347967 | 0.104902081 | 0.104902081 | -4.319460233 |
| 1420203_at   | -0.136404261 | 3.189407829 | -1.794117367 | 0.10494082  | 0.10494082  | -4.319746059 |
| 1423245_at   | -0.124252395 | 8.91553242  | -1.794088647 | 0.104945646 | 0.104945646 | -4.319781656 |
| 1459905_at   | -0.126848064 | 5.270357068 | -1.794053387 | 0.104951571 | 0.104951571 | -4.319825358 |
| 1442019_at   | 0.177126529  | 6.760761408 | 1.793877286  | 0.104981166 | 0.104981166 | -4.320043621 |
| 1419912_s_at | 0.128386905  | 9.245965114 | 1.793851695  | 0.104985468 | 0.104985468 | -4.320075338 |
| 1422997_s_at | 0.149068764  | 7.602869337 | 1.793846553  | 0.104986332 | 0.104986332 | -4.320081712 |
| 1440394_at   | 0.119823306  | 3.625022404 | 1.793640653  | 0.105020947 | 0.105020947 | -4.320336894 |
| 1451423_at   | -0.187759315 | 5.818553654 | -1.793573487 | 0.105032241 | 0.105032241 | -4.320420133 |
| 1415689_s_at | 0.114297521  | 9.445589691 | 1.793512652  | 0.105042471 | 0.105042471 | -4.320495526 |
| 1418029_at   | 0.120816214  | 7.884605841 | 1.793509557  | 0.105042991 | 0.105042991 | -4.320499361 |
| 1425950_at   | -0.20241175  | 5.953536372 | -1.793402018 | 0.105061078 | 0.105061078 | -4.320632632 |
| 1448499_a_at | -0.139746556 | 6.224793388 | -1.793175767 | 0.10509914  | 0.10509914  | -4.320913008 |
| 1444065_at   | -0.23153188  | 5.551625424 | -1.793024107 | 0.10512466  | 0.10512466  | -4.32110094  |
| 1428574_a_at | -0.214472401 | 5.204763196 | -1.792945135 | 0.105137952 | 0.105137952 | -4.321198797 |
| 1459000_at   | 0.198306708  | 6.967682998 | 1.792915884  | 0.105142875 | 0.105142875 | -4.321235043 |
| 1426809_at   | -0.108860564 | 6.076694474 | -1.792868425 | 0.105150864 | 0.105150864 | -4.321293851 |
| 1451354_at   | 0.139548302  | 7.70777306  | 1.792808096  | 0.10516102  | 0.10516102  | -4.321368604 |
| 1451758_at   | -0.157312778 | 4.170582097 | -1.792701164 | 0.105179023 | 0.105179023 | -4.3215011   |
| 1422588_at   | 0.158343617  | 4.606642589 | 1.792612692  | 0.10519392  | 0.10519392  | -4.321610721 |
| 1420701_at   | -0.183179033 | 3.889248472 | -1.79260608  | 0.105195033 | 0.105195033 | -4.321618913 |
| 1459413_at   | -0.108256296 | 4.527269959 | -1.792497719 | 0.105213283 | 0.105213283 | -4.321753174 |
| 1432640_at   | 0.128889346  | 3.272334303 | 1.792130827  | 0.105275093 | 0.105275093 | -4.322207735 |
| 1446539_at   | -0.144287341 | 4.181350073 | -1.791866033 | 0.105319724 | 0.105319724 | -4.322535778 |
| 1457189_at   | -0.148249455 | 5.433629638 | -1.791842045 | 0.105323768 | 0.105323768 | -4.322565494 |
| 1438825_at   | 0.123543942  | 3.5475961   | 1.791581621  | 0.105367681 | 0.105367681 | -4.322888103 |
| 1431001_at   | -0.162964347 | 6.060430645 | -1.791556556 | 0.105371908 | 0.105371908 | -4.322919152 |
| 1433291_at   | -0.154253465 | 5.127990277 | -1.79149752  | 0.105381865 | 0.105381865 | -4.322992281 |
| 1438454_at   | 0.211096236  | 8.990689587 | 1.791478922  | 0.105385003 | 0.105385003 | -4.323015319 |
| 1440552_at   | -0.182137746 | 3.977116536 | -1.791351223 | 0.105406545 | 0.105406545 | -4.323173499 |
| 1421225_a_at | -0.179283685 | 4.708699047 | -1.791243784 | 0.105424672 | 0.105424672 | -4.323306579 |
| 1449488_at   | 0.15642328   | 7.598046331 | 1.79086404   | 0.105488767 | 0.105488767 | -4.323776928 |
| 1442527_at   | -0.120809267 | 3.807467833 | -1.790825518 | 0.105495271 | 0.105495271 | -4.323824639 |
| 1454875_a_at | 0.220613395  | 9.826693452 | 1.790645943  | 0.105525595 | 0.105525595 | -4.324047043 |
| 1424916_x_at | 0.121513126  | 7.681501028 | 1.790601035  | 0.105533179 | 0.105533179 | -4.32410266  |
| 1430076_at   | -0.127565783 | 3.764381159 | -1.790262039 | 0.105590449 | 0.105590449 | -4.324522479 |

|              |              |             |              |             |             |              |
|--------------|--------------|-------------|--------------|-------------|-------------|--------------|
| 1446486_at   | 0.187655714  | 3.726860992 | 1.790060124  | 0.105624574 | 0.105624574 | -4.324772518 |
| 1424855_at   | -0.141735893 | 4.181716615 | -1.789879129 | 0.105655172 | 0.105655172 | -4.324996642 |
| 1417554_at   | -0.163128441 | 3.85659739  | -1.78985676  | 0.105658954 | 0.105658954 | -4.32502434  |
| 1445390_at   | -0.182598946 | 4.346422054 | -1.789482546 | 0.105722245 | 0.105722245 | -4.325487693 |
| 1423549_at   | 0.125303332  | 6.968297677 | 1.789469443  | 0.105724462 | 0.105724462 | -4.325503916 |
| 1426159_x_at | -0.123866212 | 5.309551422 | -1.789413992 | 0.105733844 | 0.105733844 | -4.325572572 |
| 1447506_at   | 0.156684528  | 5.699943983 | 1.789413979  | 0.105733846 | 0.105733846 | -4.325572589 |
| 1459661_at   | -0.153095568 | 3.984925563 | -1.789193262 | 0.105771196 | 0.105771196 | -4.325845857 |
| 1431627_at   | -0.176391956 | 4.093557363 | -1.789017922 | 0.105800876 | 0.105800876 | -4.326062936 |
| 1435983_at   | -0.14148173  | 4.618041371 | -1.788750352 | 0.105846182 | 0.105846182 | -4.326394181 |
| 1450194_a_at | -0.356628391 | 8.829169937 | -1.788260762 | 0.105929129 | 0.105929129 | -4.32700023  |
| 1433741_at   | 0.182624967  | 5.987410451 | 1.788253129  | 0.105930423 | 0.105930423 | -4.327009679 |
| 1443611_at   | 0.169994153  | 3.78928197  | 1.788216396  | 0.105936649 | 0.105936649 | -4.327055146 |
| 1456306_a_at | 0.125500121  | 3.248509969 | 1.788128864  | 0.105951486 | 0.105951486 | -4.327163492 |
| 1423506_a_at | 0.208510071  | 10.55297369 | 1.78812768   | 0.105951686 | 0.105951686 | -4.327164957 |
| 1438290_x_at | -0.180452384 | 3.446836762 | -1.788086417 | 0.105958681 | 0.105958681 | -4.327216031 |
| 1440726_at   | 0.226415015  | 3.267418051 | 1.788007253  | 0.105972103 | 0.105972103 | -4.327314015 |
| 1421094_at   | 0.115193134  | 4.858184267 | 1.787991033  | 0.105974853 | 0.105974853 | -4.327334091 |
| 1423548_s_at | -0.132496834 | 8.609967908 | -1.787910263 | 0.105988548 | 0.105988548 | -4.327434061 |
| 1433542_at   | 0.135074344  | 8.346558095 | 1.787893218  | 0.105991438 | 0.105991438 | -4.327455158 |
| 1448671_at   | 0.156949127  | 5.655584964 | 1.787745734  | 0.106016451 | 0.106016451 | -4.327637696 |
| 1446891_at   | -0.119393001 | 3.932299068 | -1.78751734  | 0.106055195 | 0.106055195 | -4.32792036  |
| 1448959_at   | -0.146243131 | 9.2200081   | -1.787401265 | 0.106074891 | 0.106074891 | -4.328064012 |
| 1455014_at   | 0.146893547  | 7.399440926 | 1.787241009  | 0.106102089 | 0.106102089 | -4.328262334 |
| 1438451_at   | 0.151553817  | 8.07840107  | 1.787105839  | 0.106125035 | 0.106125035 | -4.328429606 |
| 1424779_at   | 0.156994634  | 7.979416008 | 1.786762749  | 0.106183297 | 0.106183297 | -4.328854154 |
| 1430449_at   | 0.176619775  | 5.096482764 | 1.786747006  | 0.106185971 | 0.106185971 | -4.328873634 |
| 1450105_at   | 0.123873453  | 8.876423148 | 1.786649684  | 0.106202503 | 0.106202503 | -4.328994056 |
| 1424203_at   | -0.209639251 | 8.280165558 | -1.786584694 | 0.106213545 | 0.106213545 | -4.32907447  |
| 1426511_at   | -0.203077108 | 5.636477934 | -1.78637662  | 0.106248902 | 0.106248902 | -4.329331919 |
| 1426454_at   | 0.189403035  | 8.485131654 | 1.786012823  | 0.106310748 | 0.106310748 | -4.329782014 |
| 1453319_at   | 0.187884671  | 4.968558278 | 1.785815718  | 0.106344269 | 0.106344269 | -4.330025859 |
| 1458501_at   | 0.131502425  | 7.403380045 | 1.785721129  | 0.106360359 | 0.106360359 | -4.330142874 |
| 1460274_at   | -0.130292677 | 4.316744483 | -1.785629559 | 0.106375938 | 0.106375938 | -4.330256153 |
| 1433192_at   | -0.257552467 | 4.37525624  | -1.785547268 | 0.10638994  | 0.10638994  | -4.33035795  |
| 1452811_at   | 0.241462625  | 7.744334074 | 1.785417699  | 0.10641199  | 0.10641199  | -4.330518228 |
| 1416264_at   | 0.119619675  | 6.044891527 | 1.78537912   | 0.106418556 | 0.106418556 | -4.330565949 |
| 1458025_at   | -0.151363417 | 5.163517461 | -1.785100068 | 0.106466062 | 0.106466062 | -4.330911121 |
| 1433312_at   | 0.161505842  | 4.135404491 | 1.784642348  | 0.106544026 | 0.106544026 | -4.331477245 |
| 1453115_at   | -0.208596383 | 3.64475446  | -1.784562389 | 0.106557651 | 0.106557651 | -4.331576135 |
| 1437168_at   | 0.166971233  | 6.681815139 | 1.784492168  | 0.106569618 | 0.106569618 | -4.33166298  |
| 1418325_at   | -0.175957943 | 7.208987442 | -1.784427609 | 0.106580621 | 0.106580621 | -4.331742821 |
| 1436030_at   | 0.161799984  | 10.01619653 | 1.784313385  | 0.106600092 | 0.106600092 | -4.331884081 |
| 1432286_at   | -0.15529848  | 3.53477461  | -1.784017127 | 0.106650607 | 0.106650607 | -4.332250444 |
| 1431512_at   | -0.147252223 | 3.630717365 | -1.783877611 | 0.106674403 | 0.106674403 | -4.332422965 |
| 1428282_at   | 0.125842497  | 8.642772747 | 1.783749238  | 0.106696303 | 0.106696303 | -4.332581702 |
| 1437632_at   | 0.129601182  | 9.10204231  | 1.783718404  | 0.106701564 | 0.106701564 | -4.332619829 |
| 1459366_at   | -0.141020388 | 5.858498617 | -1.783519359 | 0.106735531 | 0.106735531 | -4.332865945 |
| 1419995_at   | -0.18881627  | 4.837979413 | -1.783501648 | 0.106738553 | 0.106738553 | -4.332887842 |
| 1428965_at   | -0.130428375 | 3.510032986 | -1.783116713 | 0.106804271 | 0.106804271 | -4.333363772 |
| 1459205_at   | 0.11035954   | 3.492314343 | 1.7829731    | 0.106828799 | 0.106828799 | -4.333541322 |
| 1435190_at   | 0.44612756   | 5.28687285  | 1.782604357  | 0.106891801 | 0.106891801 | -4.333997178 |
| 1429384_at   | -0.139880677 | 8.951514412 | -1.782214134 | 0.10695851  | 0.10695851  | -4.334479544 |

|              |              |             |              |             |             |              |
|--------------|--------------|-------------|--------------|-------------|-------------|--------------|
| 1431330_at   | -0.167238824 | 4.034033833 | -1.782126172 | 0.106973553 | 0.106973553 | -4.33458827  |
| 1416193_at   | -0.148502907 | 4.331552038 | -1.78165349  | 0.10705442  | 0.10705442  | -4.335172497 |
| 1423274_at   | 0.263390177  | 9.834519213 | 1.781509291  | 0.107079101 | 0.107079101 | -4.335350712 |
| 1443048_at   | -0.148483748 | 6.07647771  | -1.781360517 | 0.107104571 | 0.107104571 | -4.335534575 |
| 1428136_at   | -0.195994806 | 10.57666353 | -1.781320869 | 0.10711136  | 0.10711136  | -4.335583572 |
| 1447831_s_at | 0.219957371  | 4.332334478 | 1.78121882   | 0.107128834 | 0.107128834 | -4.335709685 |
| 1446229_at   | 0.16103893   | 4.769105552 | 1.781168013  | 0.107137536 | 0.107137536 | -4.335772472 |
| 1420230_at   | -0.205629497 | 3.304794698 | -1.781139169 | 0.107142476 | 0.107142476 | -4.335808116 |
| 1440497_at   | -0.143229621 | 6.217960603 | -1.781097961 | 0.107149534 | 0.107149534 | -4.33585904  |
| 1448584_at   | 0.134755249  | 8.418641966 | 1.780934799  | 0.107177484 | 0.107177484 | -4.336060664 |
| 1438203_at   | -0.149101114 | 4.325399758 | -1.780873672 | 0.107187957 | 0.107187957 | -4.336136198 |
| 1453643_at   | -0.144057214 | 5.440491977 | -1.780580961 | 0.10723812  | 0.10723812  | -4.336497887 |
| 1419034_at   | 0.219676003  | 6.500641132 | 1.780576033  | 0.107238965 | 0.107238965 | -4.336503976 |
| 1453497_a_at | -0.16343528  | 5.900459779 | -1.780528547 | 0.107247105 | 0.107247105 | -4.336562649 |
| 1450967_at   | -0.229923712 | 8.29513879  | -1.780518233 | 0.107248873 | 0.107248873 | -4.336575393 |
| 1439290_at   | -0.113807757 | 7.327499148 | -1.780434071 | 0.107263302 | 0.107263302 | -4.336679382 |
| 1451073_at   | 0.13767293   | 10.03065688 | 1.780363103  | 0.10727547  | 0.10727547  | -4.336767067 |
| 1419453_at   | 0.137759238  | 3.886592137 | 1.780346004  | 0.107278402 | 0.107278402 | -4.336788192 |
| 1431290_at   | 0.134696813  | 4.429181242 | 1.780277777  | 0.107290101 | 0.107290101 | -4.33687249  |
| 1443513_at   | -0.159904414 | 7.857052057 | -1.780137505 | 0.107314159 | 0.107314159 | -4.337045795 |
| 1456585_x_at | 0.125954323  | 7.564011662 | 1.780116917  | 0.10731769  | 0.10731769  | -4.337071231 |
| 1422163_at   | -0.165674793 | 6.474039771 | -1.780042184 | 0.10733051  | 0.10733051  | -4.33716356  |
| 1457548_at   | -0.190452415 | 6.353924739 | -1.77990435  | 0.107354158 | 0.107354158 | -4.337333845 |
| 1443103_at   | -0.112097376 | 4.998436308 | -1.779716502 | 0.107386394 | 0.107386394 | -4.33756591  |
| 1417434_at   | 0.125961182  | 8.364504037 | 1.779617539  | 0.10740338  | 0.10740338  | -4.337688164 |
| 1443485_at   | 0.115449416  | 9.104541205 | 1.778789831  | 0.107545548 | 0.107545548 | -4.338710555 |
| 1442385_at   | -0.130024076 | 4.43732839  | -1.778728713 | 0.107556053 | 0.107556053 | -4.338786041 |
| 1428122_s_at | 0.138678246  | 8.198348937 | 1.77795219   | 0.107689598 | 0.107689598 | -4.339745017 |
| 1455976_x_at | 0.118606858  | 10.75431346 | 1.777828168  | 0.107710942 | 0.107710942 | -4.339898164 |
| 1445224_at   | -0.197517795 | 4.131256916 | -1.777769902 | 0.10772097  | 0.10772097  | -4.339970111 |
| 1456610_at   | 0.128918953  | 10.23100327 | 1.77759009   | 0.107751924 | 0.107751924 | -4.340192137 |
| 1440408_at   | -0.137275856 | 5.315149315 | -1.777458274 | 0.107774621 | 0.107774621 | -4.340354894 |
| 1442586_at   | 0.199746553  | 6.582666601 | 1.777383221  | 0.107787546 | 0.107787546 | -4.340447561 |
| 1440866_at   | 0.138207462  | 6.381720119 | 1.777279092  | 0.107805481 | 0.107805481 | -4.340576126 |
| 1457696_at   | -0.182932612 | 4.93215666  | -1.777230443 | 0.107813861 | 0.107813861 | -4.34063619  |
| 1448927_at   | -0.271764149 | 5.267393918 | -1.777109323 | 0.107834727 | 0.107834727 | -4.340785728 |
| 1458521_at   | -0.145358807 | 4.809588055 | -1.776972398 | 0.10785832  | 0.10785832  | -4.340954773 |
| 1449591_at   | 0.122700939  | 4.172228334 | 1.776903892  | 0.107870126 | 0.107870126 | -4.341039348 |
| 1428084_at   | 0.109830729  | 9.165478745 | 1.776852506  | 0.107878983 | 0.107878983 | -4.341102786 |
| 1422346_at   | -0.167529488 | 4.4406267   | -1.776512811 | 0.107937546 | 0.107937546 | -4.341522132 |
| 1457605_at   | 0.180131416  | 5.533545464 | 1.776362021  | 0.107963551 | 0.107963551 | -4.34170827  |
| 1443334_at   | -0.147452108 | 4.787730457 | -1.776320521 | 0.107970709 | 0.107970709 | -4.341759496 |
| 1447848_at   | -0.235831794 | 3.69971804  | -1.776254885 | 0.107982032 | 0.107982032 | -4.341840516 |
| 1416950_at   | 0.126985897  | 9.544447297 | 1.776146901  | 0.108000661 | 0.108000661 | -4.341973805 |
| 1458954_at   | 0.246843509  | 5.16852825  | 1.776134987  | 0.108002717 | 0.108002717 | -4.34198851  |
| 1432945_at   | -0.117937326 | 4.063796043 | -1.776132151 | 0.108003206 | 0.108003206 | -4.341992011 |
| 1442368_at   | 0.210188993  | 6.793610601 | 1.776131092  | 0.108003389 | 0.108003389 | -4.341993318 |
| 1430592_at   | 0.195319887  | 4.819522699 | 1.776049764  | 0.108017422 | 0.108017422 | -4.342093702 |
| 1432060_at   | -0.195846964 | 6.103013807 | -1.775988469 | 0.108028    | 0.108028    | -4.342169358 |
| 1446327_at   | -0.135673016 | 5.258491928 | -1.775896467 | 0.108043878 | 0.108043878 | -4.342282913 |
| 1429913_at   | -0.184370205 | 4.816958911 | -1.775848453 | 0.108052165 | 0.108052165 | -4.342342174 |
| 1446465_at   | 0.142917177  | 3.498194988 | 1.775841479  | 0.108053369 | 0.108053369 | -4.342350781 |
| 1416286_at   | 0.398493236  | 6.46325373  | 1.775650808  | 0.108086286 | 0.108086286 | -4.34258611  |

|              |              |             |              |             |             |              |
|--------------|--------------|-------------|--------------|-------------|-------------|--------------|
| 1443450_at   | 0.126171934  | 3.991748072 | 1.775312774  | 0.108144666 | 0.108144666 | -4.343003289 |
| 1437569_at   | -0.12517702  | 4.723923198 | -1.775185014 | 0.108166738 | 0.108166738 | -4.343160954 |
| 1441735_at   | 0.133808857  | 3.861895351 | 1.775079043  | 0.108185049 | 0.108185049 | -4.343291725 |
| 1431761_at   | -0.209147396 | 4.231435946 | -1.775076813 | 0.108185435 | 0.108185435 | -4.343294477 |
| 1437512_x_at | -0.1284734   | 6.198803878 | -1.774865557 | 0.108221947 | 0.108221947 | -4.343555164 |
| 1428285_at   | 0.162852246  | 6.773780177 | 1.774826605  | 0.108228681 | 0.108228681 | -4.343603229 |
| 1457803_at   | -0.168480855 | 5.79426601  | -1.77462201  | 0.108264054 | 0.108264054 | -4.343855681 |
| 1423282_at   | 0.114932711  | 8.525420644 | 1.774564183  | 0.108274054 | 0.108274054 | -4.343927033 |
| 1457035_at   | 0.160308704  | 3.273774762 | 1.774133117  | 0.108348625 | 0.108348625 | -4.344458884 |
| 1418358_at   | -0.133272085 | 3.774098171 | -1.774022569 | 0.108367757 | 0.108367757 | -4.34459527  |
| 1459329_at   | -0.182550168 | 4.721270739 | -1.773946162 | 0.108380982 | 0.108380982 | -4.344689533 |
| 1438651_a_at | 0.136381433  | 11.18990629 | 1.773886366  | 0.108391333 | 0.108391333 | -4.344763303 |
| 1417164_at   | 0.20205273   | 6.43789438  | 1.773255652  | 0.108500566 | 0.108500566 | -4.345541339 |
| 1441573_at   | 0.341297576  | 6.870142891 | 1.773214699  | 0.108507663 | 0.108507663 | -4.345591854 |
| 1448289_at   | 0.487702587  | 7.781051581 | 1.773163086  | 0.108516606 | 0.108516606 | -4.345655516 |
| 1449300_at   | 0.152620492  | 7.903275609 | 1.773152666  | 0.108518412 | 0.108518412 | -4.345668369 |
| 1443138_at   | 0.316861637  | 7.174540456 | 1.772762336  | 0.108586075 | 0.108586075 | -4.346149802 |
| 1456919_at   | -0.188300038 | 3.820142544 | -1.772702561 | 0.10859644  | 0.10859644  | -4.346223525 |
| 1458313_at   | -0.186308641 | 6.515849542 | -1.77225962  | 0.108673276 | 0.108673276 | -4.346769787 |
| 1424605_at   | -0.171016355 | 5.076036792 | -1.772199912 | 0.108683637 | 0.108683637 | -4.346843418 |
| 1439483_at   | 0.338445132  | 6.598014083 | 1.772139878  | 0.108694056 | 0.108694056 | -4.346917451 |
| 1458978_at   | 0.139111526  | 3.683574319 | 1.772094577  | 0.108701918 | 0.108701918 | -4.346973314 |
| 1453382_at   | -0.129436036 | 5.618114514 | -1.771875714 | 0.108739912 | 0.108739912 | -4.347243198 |
| 1418991_at   | -0.223446396 | 6.663644444 | -1.771658295 | 0.108777667 | 0.108777667 | -4.347511288 |
| 1419568_at   | 0.252151024  | 8.590899439 | 1.771622917  | 0.108783811 | 0.108783811 | -4.347554908 |
| 1438596_at   | -0.177717337 | 3.045007488 | -1.771528192 | 0.108800265 | 0.108800265 | -4.347671704 |
| 1419894_at   | -0.109936004 | 4.396050089 | -1.771442298 | 0.108815187 | 0.108815187 | -4.34777761  |
| 1459113_at   | -0.136274243 | 3.350943088 | -1.771247272 | 0.108849074 | 0.108849074 | -4.348018062 |
| 1431917_at   | -0.182601559 | 5.242755537 | -1.771113325 | 0.108872354 | 0.108872354 | -4.348183204 |
| 1452439_s_at | 0.127019124  | 10.59565241 | 1.770759388  | 0.10893389  | 0.10893389  | -4.348619541 |
| 1430144_at   | 0.192705324  | 4.252788789 | 1.770556683  | 0.108969147 | 0.108969147 | -4.348869422 |
| 1453078_at   | 0.18994244   | 7.090821349 | 1.770552308  | 0.108969908 | 0.108969908 | -4.348874815 |
| 1443624_at   | 0.203147242  | 4.580466173 | 1.770353049  | 0.109004577 | 0.109004577 | -4.349120436 |
| 1452656_at   | 0.201998254  | 5.960688649 | 1.770313005  | 0.109011545 | 0.109011545 | -4.349169795 |
| 1427553_at   | 0.108283019  | 5.623082146 | 1.770285819  | 0.109016276 | 0.109016276 | -4.349203306 |
| 1421360_at   | -0.225782865 | 5.408567194 | -1.770204054 | 0.109030506 | 0.109030506 | -4.34930409  |
| 1435130_at   | 0.129192091  | 7.327002197 | 1.769929986  | 0.109078217 | 0.109078217 | -4.349641895 |
| 1431915_at   | -0.193141823 | 4.050622274 | -1.769902662 | 0.109082975 | 0.109082975 | -4.349675573 |
| 1427359_at   | 0.149024463  | 6.181343534 | 1.769758478  | 0.109108084 | 0.109108084 | -4.349853278 |
| 1451448_a_at | 0.145690859  | 8.318074264 | 1.769487238  | 0.109155334 | 0.109155334 | -4.350187561 |
| 1452282_at   | 0.136254069  | 7.60861936  | 1.769417996  | 0.109167398 | 0.109167398 | -4.350272894 |
| 1417707_at   | -0.143765463 | 5.279329214 | -1.769410728 | 0.109168665 | 0.109168665 | -4.350281851 |
| 1450272_at   | -0.135642512 | 4.583559417 | -1.769280076 | 0.109191434 | 0.109191434 | -4.350442859 |
| 1452194_at   | 0.113814432  | 8.661546614 | 1.769242614  | 0.109197963 | 0.109197963 | -4.350489024 |
| 1426926_at   | -0.164028672 | 6.662264796 | -1.769206077 | 0.109204331 | 0.109204331 | -4.350534049 |
| 1416795_at   | -0.146597232 | 7.166886507 | -1.76911486  | 0.109220232 | 0.109220232 | -4.350646456 |
| 1447417_at   | 0.142260296  | 5.457529317 | 1.769097388  | 0.109223278 | 0.109223278 | -4.350667985 |
| 1427645_a_at | -0.147609037 | 3.508363259 | -1.769056538 | 0.109230399 | 0.109230399 | -4.350718324 |
| 1460433_at   | -0.15527636  | 8.397470566 | -1.768975246 | 0.109244573 | 0.109244573 | -4.350818496 |
| 1447271_at   | 0.151173403  | 4.806081304 | 1.768958834  | 0.109247435 | 0.109247435 | -4.350838719 |
| 1434666_at   | -0.257301225 | 6.50482533  | -1.768910698 | 0.109255828 | 0.109255828 | -4.350898034 |
| 1440563_at   | 0.235192919  | 6.275021144 | 1.768845813  | 0.109267143 | 0.109267143 | -4.350977985 |
| 1424119_at   | 0.144574599  | 8.831442231 | 1.768827232  | 0.109270384 | 0.109270384 | -4.351000882 |

|              |              |             |              |             |             |              |
|--------------|--------------|-------------|--------------|-------------|-------------|--------------|
| 1453347_at   | -0.154940319 | 4.443050566 | -1.768609639 | 0.109308339 | 0.109308339 | -4.351268991 |
| 1452707_at   | -0.291784947 | 5.160452896 | -1.768464675 | 0.109333631 | 0.109333631 | -4.351447603 |
| 1431965_at   | -0.192391033 | 3.819098115 | -1.768396861 | 0.109345465 | 0.109345465 | -4.351531155 |
| 1434628_a_at | -0.194766693 | 5.1346219   | -1.768352887 | 0.109353139 | 0.109353139 | -4.351585333 |
| 1426792_s_at | -0.220026526 | 7.988127943 | -1.76804424  | 0.109407018 | 0.109407018 | -4.35196559  |
| 1431020_a_at | 0.274929575  | 9.10745763  | 1.767779628  | 0.109453229 | 0.109453229 | -4.352291573 |
| 1426918_at   | -0.124063529 | 10.2722113  | -1.767725847 | 0.109462623 | 0.109462623 | -4.352357824 |
| 1416701_at   | 0.128939375  | 9.327315823 | 1.767723158  | 0.109463093 | 0.109463093 | -4.352361137 |
| 1439691_at   | -0.192369824 | 7.002149669 | -1.767596085 | 0.109485292 | 0.109485292 | -4.352517672 |
| 1458729_at   | 0.207119803  | 6.987400667 | 1.767558738  | 0.109491818 | 0.109491818 | -4.352563677 |
| 1427485_at   | 0.14229706   | 5.058303484 | 1.767503322  | 0.109501501 | 0.109501501 | -4.35263194  |
| 1431187_s_at | -0.189485602 | 6.115839998 | -1.767432309 | 0.10951391  | 0.10951391  | -4.352719414 |
| 1424655_at   | 0.123462009  | 7.827658465 | 1.767413215  | 0.109517247 | 0.109517247 | -4.352742933 |
| 1457633_x_at | -0.141999748 | 4.83654065  | -1.767199889 | 0.109554535 | 0.109554535 | -4.353005697 |
| 1418185_at   | -0.226821231 | 8.399250583 | -1.767139292 | 0.109565129 | 0.109565129 | -4.353080335 |
| 1427501_at   | -0.160491026 | 4.370945436 | -1.766863786 | 0.109613307 | 0.109613307 | -4.353419665 |
| 1437222_x_at | 0.217069699  | 3.532005378 | 1.766715344  | 0.109639272 | 0.109639272 | -4.353602485 |
| 1446248_at   | 0.216072348  | 4.114197173 | 1.766695163  | 0.109642803 | 0.109642803 | -4.353627339 |
| 1451344_at   | -0.204618015 | 10.29968222 | -1.766576018 | 0.109663649 | 0.109663649 | -4.353774073 |
| 1435571_at   | 0.118745785  | 5.892404729 | 1.766558291  | 0.109666751 | 0.109666751 | -4.353795904 |
| 1424696_at   | -0.143316491 | 8.035417449 | -1.766477991 | 0.109680803 | 0.109680803 | -4.353894795 |
| 1415837_at   | -0.155725977 | 3.380372467 | -1.766309031 | 0.109710375 | 0.109710375 | -4.354102866 |
| 1453320_at   | -0.6173392   | 7.753311248 | -1.766041356 | 0.109757241 | 0.109757241 | -4.354432486 |
| 1419902_at   | -0.143944058 | 6.285232172 | -1.765903901 | 0.109781314 | 0.109781314 | -4.354601742 |
| 1441113_at   | -0.429056985 | 6.102562246 | -1.765668355 | 0.109822577 | 0.109822577 | -4.35489177  |
| 1417189_at   | 0.12653397   | 10.18422737 | 1.765622038  | 0.109830693 | 0.109830693 | -4.354948798 |
| 1420518_a_at | 0.161767141  | 7.845464154 | 1.765558183  | 0.109841882 | 0.109841882 | -4.35502742  |
| 1437792_at   | -0.1235813   | 3.893458087 | -1.764980345 | 0.109943186 | 0.109943186 | -4.355738825 |
| 1416889_at   | -0.537468272 | 6.533693811 | -1.764592532 | 0.110011223 | 0.110011223 | -4.356216227 |
| 1432647_at   | 0.174780435  | 5.644268313 | 1.76451671   | 0.11002453  | 0.11002453  | -4.356309558 |
| 1416505_at   | -0.108778122 | 8.272746095 | -1.764493132 | 0.110028668 | 0.110028668 | -4.356338581 |
| 1432643_at   | 0.116990364  | 3.880386255 | 1.764390241  | 0.110046728 | 0.110046728 | -4.356465231 |
| 1452599_s_at | -0.139866183 | 5.41280757  | -1.764207801 | 0.110078758 | 0.110078758 | -4.356689789 |
| 1456672_at   | -0.117882214 | 6.303535478 | -1.764197323 | 0.110080598 | 0.110080598 | -4.356702685 |
| 1417831_at   | 0.142951873  | 8.339704846 | 1.764120236  | 0.110094135 | 0.110094135 | -4.356797567 |
| 1450308_a_at | 0.123169301  | 7.594505813 | 1.764097882  | 0.11009806  | 0.11009806  | -4.356825079 |
| 1440391_at   | -0.139694368 | 6.416872933 | -1.76378142  | 0.110153649 | 0.110153649 | -4.357214568 |
| 1416983_s_at | 0.144401493  | 8.528226683 | 1.763618686  | 0.110182244 | 0.110182244 | -4.357414843 |
| 1454527_at   | 0.142469431  | 3.18293016  | 1.763592182  | 0.110186902 | 0.110186902 | -4.35744746  |
| 1420605_at   | -0.184662158 | 4.527665853 | -1.763528085 | 0.110198168 | 0.110198168 | -4.357526341 |
| 1425288_at   | -0.189921723 | 4.46157496  | -1.763415919 | 0.110217884 | 0.110217884 | -4.357664375 |
| 1427852_x_at | -0.194975536 | 4.201569358 | -1.76333658  | 0.110231832 | 0.110231832 | -4.357762009 |
| 1454073_at   | -0.147330848 | 3.855008857 | -1.763326113 | 0.110233672 | 0.110233672 | -4.357774889 |
| 1426521_at   | -0.136940417 | 6.953196661 | -1.763317798 | 0.110235134 | 0.110235134 | -4.357785121 |
| 1425130_a_at | 0.141914638  | 4.06528155  | 1.763208608  | 0.110254333 | 0.110254333 | -4.357919486 |
| 1420299_at   | -0.139460074 | 3.308011957 | -1.762910328 | 0.110306796 | 0.110306796 | -4.358286519 |
| 1438255_at   | 0.180879744  | 8.497329685 | 1.762830298  | 0.110320876 | 0.110320876 | -4.358384991 |
| 1445407_at   | 0.153140555  | 3.47684448  | 1.762657438  | 0.110351293 | 0.110351293 | -4.358597679 |
| 1423159_at   | 0.127853417  | 9.271995813 | 1.762337115  | 0.110407679 | 0.110407679 | -4.358991783 |
| 1432153_at   | -0.119451578 | 3.531762811 | -1.762149259 | 0.11044076  | 0.11044076  | -4.359222895 |
| 1446378_at   | -0.184959603 | 3.873556245 | -1.762069218 | 0.110454857 | 0.110454857 | -4.359321362 |
| 1459312_at   | -0.110071082 | 3.076640088 | -1.761837426 | 0.110495692 | 0.110495692 | -4.359606506 |
| 1436733_at   | 0.254446422  | 6.021494583 | 1.761611393  | 0.110535525 | 0.110535525 | -4.359884549 |

|                |              |             |              |             |             |              |
|----------------|--------------|-------------|--------------|-------------|-------------|--------------|
| 1424873_at     | 0.122005807  | 10.55159935 | 1.761359285  | 0.110579969 | 0.110579969 | -4.360194651 |
| 1422341_s_at   | 0.1769386    | 6.330811209 | 1.761341018  | 0.11058319  | 0.11058319  | -4.360217119 |
| AFFX-DapX-3_at | 0.175503719  | 9.030114012 | 1.761327094  | 0.110585646 | 0.110585646 | -4.360234246 |
| 1439597_at     | -0.13533219  | 6.384400689 | -1.761298719 | 0.110590649 | 0.110590649 | -4.360269146 |
| 1448006_at     | -0.15146602  | 6.485183225 | -1.761240701 | 0.11060088  | 0.11060088  | -4.360340507 |
| 1453241_a_at   | 0.187553855  | 3.785049114 | 1.761086218  | 0.110628127 | 0.110628127 | -4.360530511 |
| 1418579_at     | -0.16897403  | 9.360475821 | -1.76101757  | 0.110640236 | 0.110640236 | -4.360614941 |
| 1420587_at     | -0.238776782 | 5.682109967 | -1.760744383 | 0.110688439 | 0.110688439 | -4.360950922 |
| 1443985_at     | 0.184177493  | 5.093594203 | 1.76073872   | 0.110689439 | 0.110689439 | -4.360957887 |
| 1421380_at     | 0.187528243  | 3.9180837   | 1.760674302  | 0.110700808 | 0.110700808 | -4.361037107 |
| 1458409_at     | -0.171218087 | 4.689515105 | -1.760627745 | 0.110709026 | 0.110709026 | -4.361094363 |
| 1457519_at     | -0.128250305 | 4.954584285 | -1.760427455 | 0.110744384 | 0.110744384 | -4.361340668 |
| 1456868_at     | -0.139501697 | 4.607498286 | -1.760375494 | 0.110753559 | 0.110753559 | -4.361404566 |
| 1439742_at     | 0.142570288  | 4.294554095 | 1.760306447  | 0.110765752 | 0.110765752 | -4.361489473 |
| 1437113_s_at   | 0.150494756  | 7.472691797 | 1.760282188  | 0.110770036 | 0.110770036 | -4.361519304 |
| 1418742_at     | -0.138454602 | 4.48219144  | -1.760114814 | 0.110799598 | 0.110799598 | -4.361725116 |
| 1454365_at     | -0.132267757 | 4.762212752 | -1.76005064  | 0.110810935 | 0.110810935 | -4.361804025 |
| 1441335_at     | -0.158651439 | 3.680218101 | -1.759960266 | 0.110826901 | 0.110826901 | -4.361915148 |
| 1416752_at     | -0.286801252 | 5.047433643 | -1.759772767 | 0.110860034 | 0.110860034 | -4.362145688 |
| 1418998_at     | 0.157686039  | 4.165653929 | 1.759771677  | 0.110860226 | 0.110860226 | -4.362147028 |
| 1431473_at     | 0.197109678  | 4.143639485 | 1.759616812  | 0.110887599 | 0.110887599 | -4.362337435 |
| 1432204_at     | -0.165636034 | 3.932882459 | -1.759550587 | 0.110899307 | 0.110899307 | -4.362418857 |
| 1418878_at     | -0.162707936 | 3.572672884 | -1.759533428 | 0.11090234  | 0.11090234  | -4.362439953 |
| 1449131_s_at   | -0.127771938 | 9.426065925 | -1.75945451  | 0.110916293 | 0.110916293 | -4.362536978 |
| 1430719_at     | -0.168330098 | 4.822880028 | -1.759192272 | 0.11096267  | 0.11096267  | -4.362859371 |
| 1422853_at     | -0.187367827 | 7.157631444 | -1.759139555 | 0.110971995 | 0.110971995 | -4.362924178 |
| 1456813_at     | -0.147896297 | 5.340575273 | -1.759075611 | 0.110983307 | 0.110983307 | -4.363002786 |
| 1439148_a_at   | -0.155075355 | 9.463220968 | -1.75907501  | 0.110983414 | 0.110983414 | -4.363003525 |
| 1450935_at     | 0.141196167  | 8.32126121  | 1.759061498  | 0.110985804 | 0.110985804 | -4.363020136 |
| 1440061_at     | 0.213918035  | 6.105226926 | 1.759025934  | 0.110992096 | 0.110992096 | -4.363063855 |
| 1441972_at     | 0.195289742  | 7.706287043 | 1.758718492  | 0.111046503 | 0.111046503 | -4.363441781 |
| 1457848_at     | 0.122895949  | 5.284158797 | 1.758710705  | 0.111047881 | 0.111047881 | -4.363451352 |
| 1429160_at     | 0.140860827  | 6.922031363 | 1.75868432   | 0.111052552 | 0.111052552 | -4.363483784 |
| 1440487_at     | 0.302676057  | 7.284172259 | 1.758643638  | 0.111059753 | 0.111059753 | -4.36353379  |
| 1419059_at     | -0.139321469 | 4.673174186 | -1.758419242 | 0.111099484 | 0.111099484 | -4.363809608 |
| 1419328_at     | 0.115880368  | 6.253748016 | 1.758379869  | 0.111106456 | 0.111106456 | -4.363858002 |
| 1453837_at     | -0.179743911 | 5.612276227 | -1.758314476 | 0.111118037 | 0.111118037 | -4.363938377 |
| 1420749_a_at   | 0.152849649  | 3.90684142  | 1.758212089  | 0.111136173 | 0.111136173 | -4.364064219 |
| 1426892_at     | 0.397888482  | 6.532091512 | 1.758081784  | 0.111159257 | 0.111159257 | -4.364224368 |
| 1447164_at     | 0.355079389  | 7.247640305 | 1.757854088  | 0.111199604 | 0.111199604 | -4.364504204 |
| 1420154_at     | -0.131065681 | 4.584404885 | -1.757677109 | 0.111230975 | 0.111230975 | -4.364721699 |
| 1425693_at     | -0.141603799 | 6.378997517 | -1.75742421  | 0.111275816 | 0.111275816 | -4.365032477 |
| 1421841_at     | -0.200181773 | 8.919695732 | -1.757332169 | 0.11129214  | 0.11129214  | -4.365145579 |
| 1460466_at     | -0.230284387 | 7.041366773 | -1.757107298 | 0.111332031 | 0.111332031 | -4.365421892 |
| 1446787_at     | -0.167008017 | 5.49461292  | -1.757009262 | 0.111349426 | 0.111349426 | -4.365542351 |
| 1425297_at     | 0.138675784  | 7.368985768 | 1.756805443  | 0.111385599 | 0.111385599 | -4.365792777 |
| 1446239_at     | -0.160369061 | 5.969187505 | -1.756693001 | 0.111405559 | 0.111405559 | -4.365930926 |
| 1423843_at     | 0.138802803  | 6.334180202 | 1.756307566  | 0.111474005 | 0.111474005 | -4.366404453 |
| 1456068_at     | -0.162912702 | 4.729088738 | -1.755962169 | 0.111535374 | 0.111535374 | -4.366828752 |
| 1416023_at     | -0.207017622 | 7.983294737 | -1.755856879 | 0.111554088 | 0.111554088 | -4.366958088 |
| 1435060_at     | 0.252495201  | 4.93379353  | 1.755810713  | 0.111562294 | 0.111562294 | -4.367014797 |
| 1453023_at     | 0.123638     | 8.399094084 | 1.755625256  | 0.111595266 | 0.111595266 | -4.367242596 |
| 1447863_s_at   | -0.130836466 | 6.999546872 | -1.755506485 | 0.111616386 | 0.111616386 | -4.36738848  |

|              |              |             |              |             |             |              |
|--------------|--------------|-------------|--------------|-------------|-------------|--------------|
| 1448405_a_at | 0.129633512  | 12.07832761 | 1.755435059  | 0.111629089 | 0.111629089 | -4.367476208 |
| 1431921_a_at | 0.138181701  | 9.623332256 | 1.755403117  | 0.11163477  | 0.11163477  | -4.367515439 |
| 1421940_at   | 0.12934789   | 7.70049799  | 1.755349112  | 0.111644377 | 0.111644377 | -4.367581769 |
| 1441073_at   | -0.156226157 | 4.003602981 | -1.75532145  | 0.111649297 | 0.111649297 | -4.367615744 |
| 1441559_at   | -0.174259699 | 3.826775592 | -1.755211414 | 0.111668873 | 0.111668873 | -4.367750888 |
| 1431247_at   | 0.119106785  | 3.825671206 | 1.755155638  | 0.111678797 | 0.111678797 | -4.36781939  |
| 1431805_a_at | -0.209726327 | 4.429994402 | -1.754992147 | 0.11170789  | 0.11170789  | -4.368020177 |
| 1446329_at   | -0.124688752 | 4.800240481 | -1.754856043 | 0.111732116 | 0.111732116 | -4.368187324 |
| 1457431_at   | -0.152039603 | 3.631613997 | -1.754770567 | 0.111747332 | 0.111747332 | -4.368292292 |
| 1452369_at   | 0.153110437  | 5.33702047  | 1.754759798  | 0.11174925  | 0.11174925  | -4.368305517 |
| 1428861_at   | 0.198869535  | 8.48099032  | 1.754606336  | 0.111776574 | 0.111776574 | -4.368493969 |
| 1438575_a_at | -0.500969698 | 5.786044515 | -1.754518442 | 0.111792227 | 0.111792227 | -4.368601901 |
| 1433898_at   | 0.156012306  | 6.282632656 | 1.754373417  | 0.111818058 | 0.111818058 | -4.368779983 |
| 1420917_at   | 0.229748191  | 8.180682697 | 1.754367578  | 0.111819098 | 0.111819098 | -4.368787152 |
| 1457984_at   | -0.604137203 | 4.06443439  | -1.75386405  | 0.111908828 | 0.111908828 | -4.369405403 |
| 1445429_at   | -0.175406863 | 3.938231519 | -1.753793266 | 0.111921447 | 0.111921447 | -4.369492308 |
| 1444935_at   | -0.133147668 | 3.983915219 | -1.753577133 | 0.111959987 | 0.111959987 | -4.369757656 |
| 1453724_a_at | -0.128774521 | 10.47422535 | -1.753533355 | 0.11196776  | 0.11196776  | -4.369811162 |
| 1423010_at   | 0.134210914  | 6.256180994 | 1.753524149  | 0.111969436 | 0.111969436 | -4.369822703 |
| 1427797_s_at | -0.284231591 | 8.146554047 | -1.753513334 | 0.111971365 | 0.111971365 | -4.369835981 |
| 1428185_at   | 0.12266649   | 7.851888859 | 1.753201891  | 0.112026927 | 0.112026927 | -4.37021831  |
| 1458500_at   | -0.231363496 | 4.859269792 | -1.753019377 | 0.112059499 | 0.112059499 | -4.370442354 |
| 1442055_at   | 0.179854472  | 5.237768193 | 1.752930691  | 0.112075329 | 0.112075329 | -4.370551215 |
| 1441967_at   | -0.131203708 | 7.617258131 | -1.752901373 | 0.112080563 | 0.112080563 | -4.370587203 |
| 1440178_x_at | -0.156053874 | 5.103445315 | -1.75262481  | 0.112129945 | 0.112129945 | -4.370926665 |
| 1447742_at   | -0.159105016 | 6.436616369 | -1.752438117 | 0.112163291 | 0.112163291 | -4.371155805 |
| 1445913_at   | 0.14818864   | 4.588380784 | 1.75242843   | 0.112165022 | 0.112165022 | -4.371167694 |
| 1424142_at   | 0.205760742  | 7.27612077  | 1.752250165  | 0.112196871 | 0.112196871 | -4.37138648  |
| 1441380_at   | 0.247416466  | 5.293359083 | 1.752243099  | 0.112198134 | 0.112198134 | -4.371395151 |
| 1441274_at   | 0.134065817  | 6.587847955 | 1.752137977  | 0.11221692  | 0.11221692  | -4.371524163 |
| 1445541_at   | -0.145471281 | 3.562828146 | -1.752108057 | 0.112222267 | 0.112222267 | -4.371560883 |
| 1458905_x_at | -0.16045084  | 4.099869978 | -1.751621161 | 0.112309319 | 0.112309319 | -4.372158383 |
| 1434942_at   | 0.187632028  | 9.298457871 | 1.751421099  | 0.112345106 | 0.112345106 | -4.37240387  |
| 1453652_at   | 0.116750467  | 4.547334422 | 1.751320839  | 0.112363044 | 0.112363044 | -4.372526891 |
| 1449774_at   | -0.121843798 | 3.107066489 | -1.751316641 | 0.112363795 | 0.112363795 | -4.372532042 |
| 1419949_at   | -0.130473053 | 4.556676792 | -1.751313278 | 0.112364397 | 0.112364397 | -4.372536169 |
| 1443415_at   | -0.111800447 | 3.747762739 | -1.751296928 | 0.112367323 | 0.112367323 | -4.37255623  |
| 1417110_at   | 0.185085214  | 6.955420051 | 1.751263701  | 0.112373269 | 0.112373269 | -4.372596999 |
| 1460293_at   | -0.185125502 | 5.024705418 | -1.751193757 | 0.112385785 | 0.112385785 | -4.372682818 |
| 1449554_at   | -0.221016579 | 6.391140077 | -1.75112992  | 0.11239721  | 0.11239721  | -4.372761143 |
| 1429231_at   | -0.157169211 | 3.735636771 | -1.750971903 | 0.112425496 | 0.112425496 | -4.372955017 |
| 1431465_s_at | 0.201530364  | 7.825440873 | 1.750662644  | 0.112480873 | 0.112480873 | -4.373334431 |
| 1449225_a_at | 0.148965883  | 6.322643181 | 1.750454638  | 0.112518133 | 0.112518133 | -4.373589606 |
| 1457327_at   | 0.326769588  | 4.831746869 | 1.75043255   | 0.11252209  | 0.11252209  | -4.373616701 |
| 1426063_a_at | 0.205835938  | 5.360314165 | 1.750398235  | 0.112528239 | 0.112528239 | -4.373658797 |
| 1433300_at   | -0.191486612 | 4.492632478 | -1.750241867 | 0.112556259 | 0.112556259 | -4.373850613 |
| 1420824_at   | -0.148643506 | 7.869910549 | -1.750103614 | 0.112581038 | 0.112581038 | -4.374020202 |
| 1448143_at   | 0.165771995  | 9.221475568 | 1.750091581  | 0.112583195 | 0.112583195 | -4.374034962 |
| 1422877_at   | -0.178237217 | 4.367401667 | -1.749797352 | 0.112635948 | 0.112635948 | -4.374395858 |
| 1442038_at   | 0.244929047  | 7.774876559 | 1.749666878  | 0.112659348 | 0.112659348 | -4.374555888 |
| 1430916_at   | 0.136916953  | 4.03778618  | 1.749358009  | 0.112714761 | 0.112714761 | -4.374934702 |
| 1444612_at   | 0.163449623  | 6.603551317 | 1.749271342  | 0.112730313 | 0.112730313 | -4.375040988 |
| 1428357_at   | -0.119109222 | 4.977285232 | -1.748864224 | 0.1128034   | 0.1128034   | -4.375540245 |



|              |              |             |              |             |             |              |
|--------------|--------------|-------------|--------------|-------------|-------------|--------------|
| 1457711_at   | 0.178794466  | 6.98085919  | 1.748741945  | 0.11282536  | 0.11282536  | -4.375690189 |
| 1428606_at   | -0.158663922 | 4.066877257 | -1.748705124 | 0.112831974 | 0.112831974 | -4.37573534  |
| 1438484_at   | -0.171463478 | 5.403247267 | -1.748395115 | 0.112887669 | 0.112887669 | -4.376115461 |
| 1434667_at   | -0.186090359 | 9.588028772 | -1.748083092 | 0.112943752 | 0.112943752 | -4.376498024 |
| 1456464_x_at | 0.265046111  | 7.238279284 | 1.747665267  | 0.113018891 | 0.113018891 | -4.37701026  |
| 1418201_at   | 0.128819136  | 9.799036629 | 1.747548165  | 0.113039958 | 0.113039958 | -4.377153812 |
| 1422768_at   | 0.151404973  | 8.460222645 | 1.747424434  | 0.113062222 | 0.113062222 | -4.377305488 |
| 1423915_at   | -0.160245853 | 7.837264003 | -1.74708223  | 0.113123818 | 0.113123818 | -4.377724952 |
| 1429786_a_at | 0.118670936  | 8.6742467   | 1.746787448  | 0.113176902 | 0.113176902 | -4.378086258 |
| 1455473_at   | -0.106805074 | 6.214135774 | -1.746644785 | 0.113202602 | 0.113202602 | -4.378261108 |
| 1428933_at   | 0.121793041  | 6.956551405 | 1.746618939  | 0.113207258 | 0.113207258 | -4.378292784 |
| 1451507_at   | -0.243581537 | 8.526570176 | -1.746603436 | 0.113210051 | 0.113210051 | -4.378311784 |
| 1438532_at   | 0.176217084  | 9.152310735 | 1.746135017  | 0.113294474 | 0.113294474 | -4.378885833 |
| 1440254_at   | -0.114013965 | 9.509322234 | -1.746019358 | 0.113315328 | 0.113315328 | -4.379027564 |
| 1420362_a_at | 0.12615883   | 3.867756312 | 1.745980448  | 0.113322345 | 0.113322345 | -4.379075244 |
| 1441605_at   | -0.217221282 | 3.823791545 | -1.745861891 | 0.113343726 | 0.113343726 | -4.379220519 |
| 1459184_at   | -0.131919689 | 3.385477678 | -1.745831703 | 0.113349171 | 0.113349171 | -4.37925751  |
| 1439128_at   | -0.163003491 | 7.457413922 | -1.745687867 | 0.113375118 | 0.113375118 | -4.379433754 |
| 1441611_at   | 0.273694114  | 6.176586654 | 1.745280678  | 0.1134486   | 0.1134486   | -4.379932657 |
| 1431059_x_at | -0.13075799  | 6.355949263 | -1.744957948 | 0.113506872 | 0.113506872 | -4.380328041 |
| 1416960_at   | -0.143602784 | 8.034041429 | -1.744936494 | 0.113510747 | 0.113510747 | -4.380354325 |
| 1421850_at   | 0.167601449  | 4.671559469 | 1.744793582  | 0.11353656  | 0.11353656  | -4.380529399 |
| 1430176_at   | -0.165508587 | 5.185277528 | -1.744562924 | 0.113578234 | 0.113578234 | -4.380811952 |
| 1421302_a_at | -0.152734563 | 4.727310271 | -1.744390246 | 0.113609442 | 0.113609442 | -4.381023471 |
| 1423244_at   | 0.172108277  | 4.74314169  | 1.744367925  | 0.113613477 | 0.113613477 | -4.381050811 |
| 1420600_at   | 0.135621866  | 5.200064111 | 1.744054133  | 0.11367021  | 0.11367021  | -4.38143516  |
| 1427395_a_at | 0.182183304  | 5.821276996 | 1.744044467  | 0.113671958 | 0.113671958 | -4.381446998 |
| 1439867_at   | -0.147992996 | 5.119149012 | -1.744042739 | 0.11367227  | 0.11367227  | -4.381449115 |
| 1451686_x_at | -0.118404939 | 4.904215335 | -1.743709857 | 0.113732484 | 0.113732484 | -4.38185681  |
| 1432608_at   | -0.173876416 | 3.967675482 | -1.743419316 | 0.113785063 | 0.113785063 | -4.382212622 |
| 1457378_at   | 0.124666404  | 4.574673608 | 1.743338651  | 0.113799664 | 0.113799664 | -4.382311404 |
| 1435821_s_at | 0.168629679  | 8.309323777 | 1.743268279  | 0.113812404 | 0.113812404 | -4.38239758  |
| 1451266_at   | 0.176690867  | 8.120007653 | 1.743202445  | 0.113824324 | 0.113824324 | -4.382478197 |
| 1458986_at   | 0.127440287  | 3.414659805 | 1.743173625  | 0.113829542 | 0.113829542 | -4.382513488 |
| 1459288_at   | 0.379081904  | 6.131907146 | 1.743028566  | 0.113855811 | 0.113855811 | -4.382691115 |
| 1416126_at   | 0.124614802  | 8.404133104 | 1.743025932  | 0.113856288 | 0.113856288 | -4.38269434  |
| 1450161_at   | 0.170036778  | 6.319811475 | 1.742896765  | 0.113879684 | 0.113879684 | -4.382852501 |
| 1438090_x_at | -0.140891169 | 7.229886468 | -1.742818982 | 0.113893775 | 0.113893775 | -4.382947742 |
| 1420823_at   | -0.185958438 | 5.859977802 | -1.742652614 | 0.113923919 | 0.113923919 | -4.383151442 |
| 1447331_at   | 0.17029687   | 4.460006098 | 1.742546096  | 0.113943222 | 0.113943222 | -4.383281859 |
| 1415897_a_at | 0.2072862    | 9.63728961  | 1.742488881  | 0.113953592 | 0.113953592 | -4.383351909 |
| 1418941_at   | 0.152871757  | 5.520120408 | 1.742372253  | 0.113974733 | 0.113974733 | -4.383494697 |
| 1425353_at   | -0.133787018 | 4.352280841 | -1.742229085 | 0.11400069  | 0.11400069  | -4.383669972 |
| 1439516_at   | 0.21190483   | 6.660341084 | 1.742186549  | 0.114008403 | 0.114008403 | -4.383722047 |
| 1457157_at   | -0.193659544 | 6.061804711 | -1.742125573 | 0.11401946  | 0.11401946  | -4.383796696 |
| 1431345_a_at | 0.131339385  | 7.477150343 | 1.742086705  | 0.114026509 | 0.114026509 | -4.383844277 |
| 1432033_at   | -0.136296486 | 5.503006226 | -1.741951645 | 0.114051005 | 0.114051005 | -4.384009615 |
| 1443303_at   | 0.15624256   | 5.398131658 | 1.741931713  | 0.114054621 | 0.114054621 | -4.384034015 |
| 1437810_a_at | 0.47455281   | 6.279652918 | 1.741893002  | 0.114061643 | 0.114061643 | -4.384081403 |
| 1417005_at   | 0.278929063  | 8.525343001 | 1.741849606  | 0.114069516 | 0.114069516 | -4.384134525 |
| 1444436_at   | 0.132034199  | 6.69197238  | 1.74155323   | 0.114123297 | 0.114123297 | -4.384497315 |
| 1445427_at   | 0.191538516  | 7.103631763 | 1.741195606  | 0.114188222 | 0.114188222 | -4.384935041 |
| 1421104_at   | -0.236511483 | 4.896950191 | -1.741047584 | 0.114215105 | 0.114215105 | -4.385116206 |

|              |              |             |              |             |             |              |
|--------------|--------------|-------------|--------------|-------------|-------------|--------------|
| 1442506_at   | 0.181061017  | 3.737529995 | 1.740723754  | 0.114273937 | 0.114273937 | -4.385512521 |
| 1460560_at   | -0.164714862 | 8.006471838 | -1.740327565 | 0.114345953 | 0.114345953 | -4.385997347 |
| 1438862_at   | -0.145209849 | 5.173259956 | -1.739968108 | 0.114411328 | 0.114411328 | -4.386437182 |
| 1449051_at   | 0.159501546  | 4.640302793 | 1.73991667   | 0.114420686 | 0.114420686 | -4.386500119 |
| 1444160_at   | -0.21813136  | 4.420497665 | -1.739888659 | 0.114425782 | 0.114425782 | -4.386534391 |
| 1456978_s_at | -0.46429378  | 4.651345642 | -1.73980824  | 0.114440415 | 0.114440415 | -4.386632786 |
| 1418176_at   | -0.184925734 | 5.743395169 | -1.739698159 | 0.114460447 | 0.114460447 | -4.386767469 |
| 1446801_at   | -0.252683081 | 4.036756237 | -1.739505917 | 0.114495438 | 0.114495438 | -4.387002665 |
| 1421544_at   | -0.162700816 | 5.895648085 | -1.739350966 | 0.114523649 | 0.114523649 | -4.387192231 |
| 1444285_at   | 0.213415844  | 5.60757355  | 1.739312056  | 0.114530734 | 0.114530734 | -4.387239831 |
| 1423240_at   | -0.221291595 | 7.059544328 | -1.739298401 | 0.11453322  | 0.11453322  | -4.387256536 |
| 1424322_at   | -0.127699938 | 6.371610709 | -1.739193818 | 0.114552266 | 0.114552266 | -4.387384476 |
| 1444281_at   | 0.274532388  | 4.763561791 | 1.739060932  | 0.11457647  | 0.11457647  | -4.387547036 |
| 1454528_at   | -0.128511946 | 3.448393409 | -1.73882748  | 0.114619003 | 0.114619003 | -4.387832604 |
| 1438330_at   | -0.209708356 | 6.299704341 | -1.73882413  | 0.114619613 | 0.114619613 | -4.387836701 |
| 1459515_at   | 0.163462319  | 3.515684586 | 1.738602865  | 0.11465994  | 0.11465994  | -4.388107347 |
| 1433825_at   | 0.16043656   | 7.973333471 | 1.738273944  | 0.11471991  | 0.11471991  | -4.388509644 |
| 1447044_at   | 0.197163154  | 4.451476044 | 1.738233736  | 0.114727243 | 0.114727243 | -4.388558821 |
| 1434983_at   | -0.324626787 | 5.297037418 | -1.738203638 | 0.114732732 | 0.114732732 | -4.388595631 |
| 1419895_at   | -0.161499288 | 3.748667665 | -1.737987581 | 0.114772144 | 0.114772144 | -4.388859865 |
| 1435965_at   | -0.146569534 | 9.154932835 | -1.737631362 | 0.114837151 | 0.114837151 | -4.389295482 |
| 1433966_x_at | 0.171563902  | 8.027385636 | 1.737296734  | 0.114898249 | 0.114898249 | -4.389704661 |
| 1425612_at   | 0.13827898   | 3.381224671 | 1.737251887  | 0.11490644  | 0.11490644  | -4.389759497 |
| 1426514_at   | 0.198038119  | 8.368374957 | 1.736914128  | 0.114968143 | 0.114968143 | -4.390172464 |
| 1449883_at   | -0.166398383 | 4.163000855 | -1.736712506 | 0.115004991 | 0.115004991 | -4.390418965 |
| 1420367_at   | 0.214695124  | 6.071242044 | 1.736709359  | 0.115005566 | 0.115005566 | -4.390422812 |
| 1437352_at   | 0.138203889  | 5.746573961 | 1.73666314   | 0.115014014 | 0.115014014 | -4.390479317 |
| 1452895_at   | 0.132480244  | 8.718604997 | 1.736633031  | 0.115019518 | 0.115019518 | -4.390516127 |
| 1459527_at   | -0.158961911 | 4.215273042 | -1.736468593 | 0.115049582 | 0.115049582 | -4.390717153 |
| 1418911_s_at | 0.186349665  | 5.641825276 | 1.736395553  | 0.115062938 | 0.115062938 | -4.390806441 |
| 1425783_at   | -0.127472177 | 3.483990686 | -1.736218858 | 0.115095254 | 0.115095254 | -4.391022439 |
| 1427964_at   | 0.138540187  | 6.841862816 | 1.7361955    | 0.115099526 | 0.115099526 | -4.391050992 |
| 1425684_at   | -0.150116856 | 5.650764429 | -1.735867142 | 0.115159604 | 0.115159604 | -4.39145236  |
| 1437836_x_at | 0.135213408  | 4.919212168 | 1.735808431  | 0.115170349 | 0.115170349 | -4.391524121 |
| 1416105_at   | -0.180963251 | 9.856073346 | -1.735627169 | 0.115203529 | 0.115203529 | -4.391745669 |
| 1448972_at   | -0.323000014 | 6.827743632 | -1.735470062 | 0.115232294 | 0.115232294 | -4.391937684 |
| 1453058_at   | 0.132748435  | 6.196337533 | 1.735451608  | 0.115235673 | 0.115235673 | -4.391960238 |
| 1424200_s_at | 0.12592562   | 9.670189799 | 1.735288816  | 0.115265487 | 0.115265487 | -4.392159193 |
| 1448352_at   | 0.431302858  | 8.656562859 | 1.735172649  | 0.115286766 | 0.115286766 | -4.392301161 |
| 1435654_at   | -0.143529437 | 6.973978598 | -1.735146053 | 0.115291639 | 0.115291639 | -4.392333663 |
| 1451042_a_at | 0.113440366  | 8.436701193 | 1.735135101  | 0.115293645 | 0.115293645 | -4.392347047 |
| 1421017_at   | 0.163269656  | 3.539038157 | 1.73494704   | 0.115328103 | 0.115328103 | -4.392576866 |
| 1430312_at   | 0.133678927  | 4.653872742 | 1.734942733  | 0.115328893 | 0.115328893 | -4.392582129 |
| 1441668_at   | 0.131824726  | 6.564702388 | 1.734913265  | 0.115334293 | 0.115334293 | -4.392618139 |
| 1450147_at   | -0.145117593 | 5.839865954 | -1.734783901 | 0.115358003 | 0.115358003 | -4.392776219 |
| 1436240_at   | -1.782963917 | 9.571360297 | -1.734752333 | 0.115363789 | 0.115363789 | -4.392814794 |
| 1416560_at   | -0.146325958 | 4.104310019 | -1.734677656 | 0.115377478 | 0.115377478 | -4.392906045 |
| 1440009_at   | 0.506563969  | 5.243416411 | 1.734011283  | 0.115499701 | 0.115499701 | -4.393720237 |
| 1430140_at   | 0.17278461   | 3.666252411 | 1.733889511  | 0.115522048 | 0.115522048 | -4.393869006 |
| 1425796_a_at | -0.168839024 | 6.931148427 | -1.733884884 | 0.115522897 | 0.115522897 | -4.393874659 |
| 1429787_x_at | 0.13624037   | 9.417184413 | 1.733768679  | 0.115544227 | 0.115544227 | -4.394016623 |
| 1453474_at   | -0.116768426 | 4.207454195 | -1.7337576   | 0.115546261 | 0.115546261 | -4.394030158 |
| 1443460_at   | 0.159776719  | 6.058315219 | 1.733716883  | 0.115553735 | 0.115553735 | -4.394079899 |

|              |              |             |              |             |             |              |
|--------------|--------------|-------------|--------------|-------------|-------------|--------------|
| 1417265_s_at | 0.160444683  | 6.431794508 | 1.733634037  | 0.115568945 | 0.115568945 | -4.394181106 |
| 1449168_a_at | -0.125143568 | 8.702045315 | -1.733632226 | 0.115569278 | 0.115569278 | -4.394183319 |
| 1416837_at   | 0.125499173  | 9.131782309 | 1.733604324  | 0.115574401 | 0.115574401 | -4.394217404 |
| 1433481_at   | -0.148534743 | 9.67866917  | -1.733553584 | 0.115583718 | 0.115583718 | -4.394279387 |
| 1432537_at   | -0.107371989 | 3.664872663 | -1.73344101  | 0.115604391 | 0.115604391 | -4.394416903 |
| 1420795_at   | 0.119022141  | 6.4214137   | 1.733323059  | 0.115626055 | 0.115626055 | -4.394560984 |
| 1429888_a_at | -0.355097629 | 6.333466488 | -1.73327209  | 0.115635417 | 0.115635417 | -4.394623242 |
| 1449537_at   | -0.129554831 | 6.028168983 | -1.73305209  | 0.115675838 | 0.115675838 | -4.394891963 |
| 1421624_a_at | -0.114431697 | 7.242975083 | -1.733021042 | 0.115681543 | 0.115681543 | -4.394929887 |
| 1431755_a_at | 0.1899566    | 5.953863595 | 1.732743359  | 0.115732583 | 0.115732583 | -4.395269041 |
| 1436782_at   | -0.145438001 | 3.770183373 | -1.732728548 | 0.115735305 | 0.115735305 | -4.39528713  |
| 1435542_s_at | 0.125532277  | 9.630861304 | 1.732610145  | 0.115757075 | 0.115757075 | -4.395431737 |
| 1450780_s_at | 0.283486623  | 10.72119614 | 1.73244894   | 0.115786721 | 0.115786721 | -4.395628612 |
| 1436122_at   | 0.155463578  | 7.470025638 | 1.732293353  | 0.115815339 | 0.115815339 | -4.395818617 |
| 1436870_s_at | 0.224051121  | 6.204971838 | 1.732198888  | 0.115832718 | 0.115832718 | -4.395933975 |
| 1451775_s_at | 0.16396181   | 6.592969372 | 1.732098259  | 0.115851234 | 0.115851234 | -4.396056858 |
| 1439950_at   | 0.132747895  | 5.719732943 | 1.731998112  | 0.115869664 | 0.115869664 | -4.396179149 |
| 1432533_a_at | -0.122286643 | 7.84674791  | -1.731713369 | 0.115922079 | 0.115922079 | -4.396526837 |
| 1441707_at   | 0.150028196  | 6.127325375 | 1.73153883   | 0.115954219 | 0.115954219 | -4.396739947 |
| 1449524_at   | -0.171705832 | 7.331386553 | -1.731475428 | 0.115965895 | 0.115965895 | -4.396817357 |
| 1453540_at   | 0.678426517  | 5.928887701 | 1.731438435  | 0.115972709 | 0.115972709 | -4.396862523 |
| 1427759_a_at | -0.135387807 | 4.351564034 | -1.731291457 | 0.115999784 | 0.115999784 | -4.397041969 |
| 1450871_a_at | -0.231466082 | 7.680988703 | -1.731272475 | 0.116003281 | 0.116003281 | -4.397065144 |
| 1458020_at   | 0.133237113  | 3.90612046  | 1.731154634  | 0.116024993 | 0.116024993 | -4.397209011 |
| 1460118_at   | 0.195581983  | 5.182412033 | 1.730997459  | 0.116053958 | 0.116053958 | -4.397400893 |
| 1435321_at   | 0.171489098  | 9.175101479 | 1.730927633  | 0.116066829 | 0.116066829 | -4.397486136 |
| 1440004_at   | -0.130003168 | 4.010215581 | -1.73075668  | 0.116098344 | 0.116098344 | -4.397694825 |
| 1425156_at   | 0.184651601  | 6.38614567  | 1.730312547  | 0.116180256 | 0.116180256 | -4.398236955 |
| 1436281_at   | 0.186689463  | 6.871226731 | 1.730074387  | 0.116224202 | 0.116224202 | -4.398527639 |
| 1436508_at   | -0.153793153 | 8.952883824 | -1.73003812  | 0.116230896 | 0.116230896 | -4.398571903 |
| 1458912_at   | 0.300331423  | 7.054789951 | 1.729863063  | 0.116263209 | 0.116263209 | -4.398785554 |
| 1427773_a_at | -0.138699513 | 9.696702677 | -1.729821919 | 0.116270805 | 0.116270805 | -4.398835767 |
| 1437918_at   | -0.119263246 | 4.833747637 | -1.729732773 | 0.116287264 | 0.116287264 | -4.398944562 |
| 1428788_at   | -0.149512746 | 8.330993178 | -1.729645968 | 0.116303294 | 0.116303294 | -4.399050498 |
| 1448496_a_at | 0.150349289  | 9.601923863 | 1.729627747  | 0.116306659 | 0.116306659 | -4.399072734 |
| 1421477_at   | 0.20997409   | 7.730772827 | 1.729532159  | 0.116324313 | 0.116324313 | -4.399189385 |
| 1429847_a_at | 0.172124822  | 7.818076489 | 1.729515533  | 0.116327384 | 0.116327384 | -4.399209675 |
| 1443915_at   | 0.155605555  | 5.569812054 | 1.729401852  | 0.116348383 | 0.116348383 | -4.399348401 |
| 1456673_at   | -0.114485834 | 4.718317339 | -1.729129171 | 0.116398767 | 0.116398767 | -4.399681141 |
| 1453026_at   | -0.138494995 | 3.675075252 | -1.728884905 | 0.116443917 | 0.116443917 | -4.399979187 |
| 1452444_at   | 0.162262245  | 4.279006711 | 1.728661119  | 0.116485296 | 0.116485296 | -4.400252229 |
| 1457285_at   | 0.118228297  | 9.303836551 | 1.728597325  | 0.116497094 | 0.116497094 | -4.400330062 |
| 1440574_at   | -0.1410695   | 4.129457703 | -1.728534086 | 0.116508791 | 0.116508791 | -4.400407215 |
| 1444864_at   | -0.122366632 | 4.050179561 | -1.728478116 | 0.116519144 | 0.116519144 | -4.400475499 |
| 1452624_at   | -0.187069297 | 6.939794112 | -1.728217344 | 0.116567392 | 0.116567392 | -4.400793633 |
| 1443117_at   | 0.301749166  | 7.557481044 | 1.727995413  | 0.116608467 | 0.116608467 | -4.401064364 |
| 1459131_at   | -0.138907946 | 3.860128907 | -1.727799086 | 0.116644815 | 0.116644815 | -4.40130385  |
| 1418662_at   | 0.114147715  | 6.358734964 | 1.727119387  | 0.116770734 | 0.116770734 | -4.402132873 |
| 1427580_a_at | 0.442879424  | 9.945731093 | 1.727117245  | 0.116771131 | 0.116771131 | -4.402135486 |
| 1450475_at   | -0.265844548 | 7.777081379 | -1.727102676 | 0.116773832 | 0.116773832 | -4.402153253 |
| 1444768_at   | 0.140047708  | 3.881445144 | 1.727060736  | 0.116781606 | 0.116781606 | -4.402204402 |
| 1432982_at   | -0.172964587 | 3.311859399 | -1.726985601 | 0.116795534 | 0.116795534 | -4.402296033 |
| 1429649_at   | -0.171708577 | 6.416044466 | -1.72694752  | 0.116802594 | 0.116802594 | -4.402342475 |

|              |              |             |              |             |             |              |
|--------------|--------------|-------------|--------------|-------------|-------------|--------------|
| 1458327_x_at | 0.149324298  | 3.212903998 | 1.726891354  | 0.116813007 | 0.116813007 | -4.40241097  |
| 1439843_at   | 0.199976992  | 5.131691577 | 1.726683211  | 0.116851605 | 0.116851605 | -4.402664797 |
| 1435504_at   | -0.218269491 | 5.990215299 | -1.726193812 | 0.116942403 | 0.116942403 | -4.403261556 |
| 1455254_at   | 0.13057998   | 8.387653464 | 1.726044194  | 0.116970175 | 0.116970175 | -4.403443981 |
| 1417447_at   | -0.162502786 | 3.872655406 | -1.7259471   | 0.116988201 | 0.116988201 | -4.403562363 |
| 1426982_at   | -0.152772835 | 8.05501046  | -1.725852841 | 0.117005702 | 0.117005702 | -4.403677284 |
| 1454212_x_at | -0.166830643 | 4.047500304 | -1.725832311 | 0.117009515 | 0.117009515 | -4.403702314 |
| 1453713_s_at | -0.12270431  | 4.597690232 | -1.725693247 | 0.117035341 | 0.117035341 | -4.403871855 |
| 1459513_at   | 0.135096902  | 4.030446081 | 1.725684179  | 0.117037025 | 0.117037025 | -4.40388291  |
| 1415844_at   | 0.205906107  | 3.814290118 | 1.72556777   | 0.117058648 | 0.117058648 | -4.404024826 |
| 1431102_at   | -0.197385003 | 6.126847521 | -1.725378547 | 0.117093804 | 0.117093804 | -4.404255503 |
| 1429073_at   | 0.247977148  | 6.208543209 | 1.725107116  | 0.11714425  | 0.11714425  | -4.404586377 |
| 1439426_x_at | 0.266493836  | 7.344506061 | 1.725099309  | 0.117145702 | 0.117145702 | -4.404595892 |
| 1446333_at   | -0.172266009 | 4.21239204  | -1.724857167 | 0.117190722 | 0.117190722 | -4.404891044 |
| 1443185_at   | -0.142127705 | 7.66260678  | -1.724834291 | 0.117194976 | 0.117194976 | -4.404918927 |
| 1447117_at   | 0.201442619  | 3.980607137 | 1.7248308    | 0.117195625 | 0.117195625 | -4.404923182 |
| 1420565_at   | -0.141700844 | 3.503386302 | -1.724608895 | 0.117236898 | 0.117236898 | -4.405193647 |
| 1431791_a_at | 0.150723185  | 6.039465862 | 1.724461811  | 0.117264262 | 0.117264262 | -4.40537291  |
| 1431098_at   | 0.305630067  | 6.105968108 | 1.724137537  | 0.117324612 | 0.117324612 | -4.405768104 |
| 1428313_at   | 0.142116691  | 6.542484836 | 1.724069001  | 0.117337371 | 0.117337371 | -4.405851625 |
| 1438896_at   | 0.15657138   | 3.620447977 | 1.724032372  | 0.11734419  | 0.11734419  | -4.405896262 |
| 1439931_at   | -0.145342913 | 7.664027199 | -1.723904334 | 0.117368031 | 0.117368031 | -4.40605229  |
| 1419178_at   | -0.150440489 | 3.754456269 | -1.723755177 | 0.117395809 | 0.117395809 | -4.406234045 |
| 1422865_at   | 0.134510867  | 8.29204413  | 1.72372364   | 0.117401683 | 0.117401683 | -4.406272474 |
| 1441034_at   | 0.14714045   | 7.305337784 | 1.723582783  | 0.117427922 | 0.117427922 | -4.406444108 |
| 1442505_at   | -0.15831225  | 7.561605219 | -1.72353313  | 0.117437173 | 0.117437173 | -4.40650461  |
| 1458475_at   | -0.137725777 | 4.035528273 | -1.723477343 | 0.117447567 | 0.117447567 | -4.406572584 |
| 1425473_at   | 0.124587018  | 8.701184597 | 1.723435148  | 0.11745543  | 0.11745543  | -4.406623995 |
| 1443808_at   | -0.145759066 | 3.516347493 | -1.72341003  | 0.11746011  | 0.11746011  | -4.4066546   |
| 1434053_x_at | 0.121137787  | 10.91932567 | 1.723235714  | 0.117492598 | 0.117492598 | -4.406866986 |
| 1452789_at   | 0.192896053  | 9.362335893 | 1.723150444  | 0.117508493 | 0.117508493 | -4.406970875 |
| 1425499_at   | -0.115528969 | 3.116055895 | -1.723144114 | 0.117509673 | 0.117509673 | -4.406978587 |
| 1418081_at   | 0.105904738  | 9.236762124 | 1.722986156  | 0.117539123 | 0.117539123 | -4.407171031 |
| 1415694_at   | 0.196509041  | 7.953665467 | 1.722774319  | 0.117578628 | 0.117578628 | -4.407429103 |
| 1441577_at   | -0.148294663 | 8.392318254 | -1.722663525 | 0.117599295 | 0.117599295 | -4.407564073 |
| 1421969_a_at | -0.220442572 | 5.765205225 | -1.722543551 | 0.117621678 | 0.117621678 | -4.407710222 |
| 1437092_at   | -0.198190737 | 4.452757214 | -1.722506043 | 0.117628677 | 0.117628677 | -4.407755912 |
| 1423540_at   | -0.130590474 | 8.595333558 | -1.722289534 | 0.117669082 | 0.117669082 | -4.408019643 |
| 1449457_at   | -0.231987799 | 5.252928042 | -1.722255831 | 0.117675373 | 0.117675373 | -4.408060696 |
| 1442928_at   | -0.270856332 | 4.937825279 | -1.722206681 | 0.117684548 | 0.117684548 | -4.408120563 |
| 1444187_at   | -0.152376845 | 3.448935941 | -1.722124953 | 0.117699805 | 0.117699805 | -4.408220111 |
| 1419673_at   | 0.210656343  | 5.840281761 | 1.721993481  | 0.117724352 | 0.117724352 | -4.408380244 |
| 1418395_at   | -0.200703477 | 3.977936338 | -1.721991608 | 0.117724702 | 0.117724702 | -4.408382525 |
| 1432912_at   | 0.142524086  | 3.552973557 | 1.721892751  | 0.117743163 | 0.117743163 | -4.408502929 |
| 1438015_at   | 0.191153198  | 9.499150656 | 1.72184778   | 0.117751562 | 0.117751562 | -4.408557702 |
| 1443942_at   | -0.19329278  | 6.642539755 | -1.721817569 | 0.117757205 | 0.117757205 | -4.408594496 |
| 1418709_at   | -0.140888247 | 4.415397839 | -1.721815164 | 0.117757654 | 0.117757654 | -4.408597425 |
| 1445188_at   | 0.187719765  | 3.43332979  | 1.721773073  | 0.117765516 | 0.117765516 | -4.408648689 |
| 1426694_at   | 0.135310274  | 8.247739439 | 1.721723835  | 0.117774713 | 0.117774713 | -4.408708656 |
| 1422248_at   | -0.162968682 | 4.274833432 | -1.721573977 | 0.117802711 | 0.117802711 | -4.408891164 |
| 1441829_s_at | -0.145474165 | 7.24245389  | -1.721531152 | 0.117810712 | 0.117810712 | -4.408943318 |
| 1457318_at   | -0.209114496 | 5.2858323   | -1.721269918 | 0.117859535 | 0.117859535 | -4.409261447 |
| 1421644_at   | 0.138648807  | 3.382930585 | 1.72126464   | 0.117860521 | 0.117860521 | -4.409267874 |

|              |              |             |              |             |             |              |
|--------------|--------------|-------------|--------------|-------------|-------------|--------------|
| 1434913_at   | 0.129877163  | 5.232019348 | 1.721236686  | 0.117865747 | 0.117865747 | -4.409301915 |
| 1434045_at   | -0.178180708 | 7.877301256 | -1.721155178 | 0.117880984 | 0.117880984 | -4.40940117  |
| 1419614_at   | -0.155405634 | 4.345657155 | -1.720945072 | 0.117920271 | 0.117920271 | -4.409657012 |
| 1439909_at   | 0.153583835  | 7.875264879 | 1.720888585  | 0.117930836 | 0.117930836 | -4.409725794 |
| 1429362_a_at | 0.159114612  | 9.669101757 | 1.720505336  | 0.118002535 | 0.118002535 | -4.410192428 |
| 1418156_at   | -0.145071508 | 8.043091846 | -1.720488522 | 0.118005681 | 0.118005681 | -4.410212898 |
| 1428789_at   | 0.149887341  | 9.067279547 | 1.720329504  | 0.118035443 | 0.118035443 | -4.410406499 |
| 1459652_at   | 0.126513048  | 4.386245401 | 1.720194914  | 0.118060638 | 0.118060638 | -4.410570355 |
| 1433531_at   | 0.222255901  | 7.076580965 | 1.720059372  | 0.118086016 | 0.118086016 | -4.410735362 |
| 1432008_at   | -0.190309862 | 4.006093988 | -1.720039955 | 0.118089652 | 0.118089652 | -4.410759    |
| 1416275_at   | 0.134094133  | 6.802841272 | 1.719964422  | 0.118103797 | 0.118103797 | -4.410850951 |
| 1426332_a_at | -0.254662144 | 6.431860476 | -1.719953305 | 0.118105879 | 0.118105879 | -4.410864483 |
| 1434374_at   | -0.233312009 | 7.761597163 | -1.719852105 | 0.118124834 | 0.118124834 | -4.410987677 |
| 1453041_at   | 0.191058708  | 4.176034806 | 1.719821919  | 0.118130488 | 0.118130488 | -4.411024422 |
| 1449595_at   | 0.158512341  | 3.845295346 | 1.71978501   | 0.118137402 | 0.118137402 | -4.41106935  |
| 1424136_a_at | -0.105715143 | 8.857266669 | -1.719652598 | 0.118162209 | 0.118162209 | -4.411230532 |
| 1433403_at   | -0.107956946 | 4.00336131  | -1.719624131 | 0.118167543 | 0.118167543 | -4.411265182 |
| 1451122_at   | 0.165603287  | 9.06436662  | 1.719555713  | 0.118180363 | 0.118180363 | -4.411348463 |
| 1448083_at   | 0.184961026  | 4.946840812 | 1.719510416  | 0.118188852 | 0.118188852 | -4.411403598 |
| 1424930_s_at | 0.153790016  | 4.934063239 | 1.719390922  | 0.118211247 | 0.118211247 | -4.411549044 |
| 1431432_at   | -0.1657322   | 6.114332541 | -1.719367337 | 0.118215668 | 0.118215668 | -4.411577751 |
| 1460103_at   | 0.169741423  | 3.949267209 | 1.719340176  | 0.118220759 | 0.118220759 | -4.411610809 |
| 1425667_at   | -0.143749979 | 5.048744188 | -1.719256756 | 0.118236397 | 0.118236397 | -4.411712342 |
| 1444141_at   | 0.190774619  | 5.957119146 | 1.719235432  | 0.118240395 | 0.118240395 | -4.411738296 |
| 1422036_at   | 0.176105008  | 5.43496339  | 1.719138441  | 0.11825858  | 0.11825858  | -4.411856344 |
| 1437327_x_at | 0.131139791  | 8.774152264 | 1.718880315  | 0.118306988 | 0.118306988 | -4.412170494 |
| 1443554_at   | 0.122543628  | 7.613145271 | 1.71877333   | 0.118327058 | 0.118327058 | -4.412300693 |
| 1457307_at   | -0.143262937 | 3.348033534 | -1.718411336 | 0.118394987 | 0.118394987 | -4.412741207 |
| 1443090_at   | 0.244309803  | 6.528842502 | 1.718354602  | 0.118405636 | 0.118405636 | -4.412810242 |
| 1419938_s_at | -0.155766107 | 7.297395447 | -1.718212606 | 0.118432294 | 0.118432294 | -4.412983025 |
| 1423423_at   | -0.110269133 | 12.05561776 | -1.718198018 | 0.118435033 | 0.118435033 | -4.413000776 |
| 1456174_x_at | 0.324724677  | 8.713419889 | 1.718131684  | 0.118447488 | 0.118447488 | -4.413081489 |
| 1456324_at   | 0.249039757  | 7.351599988 | 1.718044541  | 0.118463853 | 0.118463853 | -4.41318752  |
| 1417159_at   | 0.16425172   | 5.921267997 | 1.718018603  | 0.118468724 | 0.118468724 | -4.413219081 |
| 1423434_at   | 0.173495362  | 4.952527317 | 1.717568877  | 0.118553214 | 0.118553214 | -4.413766242 |
| 1424345_s_at | -0.270744363 | 8.920518232 | -1.7175466   | 0.118557401 | 0.118557401 | -4.413793344 |
| 1449677_s_at | -0.160482549 | 6.474691522 | -1.717098262 | 0.118641687 | 0.118641687 | -4.41433875  |
| 1446883_at   | -0.145165326 | 6.536382655 | -1.716981362 | 0.118663673 | 0.118663673 | -4.41448095  |
| 1425789_s_at | 0.281708009  | 8.199482842 | 1.716713978  | 0.118713975 | 0.118713975 | -4.414806184 |
| 1452031_at   | -0.364595865 | 8.292871253 | -1.716665818 | 0.118723037 | 0.118723037 | -4.414864761 |
| 1455931_at   | 0.281228347  | 5.081108419 | 1.7164983    | 0.118754564 | 0.118754564 | -4.415068509 |
| 1452233_at   | 0.118397817  | 8.180358452 | 1.716422183  | 0.118768892 | 0.118768892 | -4.415161085 |
| 1452181_at   | -0.241842622 | 8.518576113 | -1.71639265  | 0.118774451 | 0.118774451 | -4.415197004 |
| 1422744_at   | -0.158306086 | 6.679496354 | -1.716388466 | 0.118775239 | 0.118775239 | -4.415202092 |
| 1446414_at   | 0.125079746  | 3.632808218 | 1.716380456  | 0.118776747 | 0.118776747 | -4.415211835 |
| 1442244_at   | -0.115947591 | 4.419656223 | -1.716330889 | 0.118786078 | 0.118786078 | -4.415272118 |
| 1436285_at   | -0.383592651 | 4.944252092 | -1.716262749 | 0.118798907 | 0.118798907 | -4.415354989 |
| 1440064_at   | -0.153019464 | 6.340935939 | -1.716260879 | 0.118799259 | 0.118799259 | -4.415357262 |
| 1441789_at   | 0.208208106  | 4.694320784 | 1.716254625  | 0.118800437 | 0.118800437 | -4.415364869 |
| 1415758_at   | 0.126109108  | 8.625028267 | 1.716087338  | 0.118831939 | 0.118831939 | -4.415568314 |
| 1415803_at   | 0.168244671  | 5.852128993 | 1.716016275  | 0.118845323 | 0.118845323 | -4.415654733 |
| 1416600_a_at | 0.123306502  | 8.867704918 | 1.715964954  | 0.11885499  | 0.11885499  | -4.415717144 |
| 1444226_at   | -0.120796631 | 4.494193031 | -1.715927337 | 0.118862076 | 0.118862076 | -4.41576289  |

|              |              |             |              |             |             |              |
|--------------|--------------|-------------|--------------|-------------|-------------|--------------|
| 1417547_at   | -0.131902872 | 8.726648723 | -1.715907894 | 0.118865738 | 0.118865738 | -4.415786533 |
| 1428737_s_at | -0.117424592 | 7.473937977 | -1.715409117 | 0.118959733 | 0.118959733 | -4.416393036 |
| 1450416_at   | -0.127589121 | 9.195631407 | -1.715180948 | 0.119002754 | 0.119002754 | -4.416670459 |
| 1440407_at   | -0.195579294 | 5.730837382 | -1.715140541 | 0.119010375 | 0.119010375 | -4.416719586 |
| 1428704_at   | 0.149282163  | 6.028496493 | 1.715022136  | 0.119032707 | 0.119032707 | -4.416863543 |
| 1439178_at   | 0.149394321  | 6.403650235 | 1.71485792   | 0.119063685 | 0.119063685 | -4.41706319  |
| 1430136_at   | 0.141139399  | 4.20910558  | 1.714770403  | 0.119080198 | 0.119080198 | -4.417169585 |
| 1449973_a_at | -0.205416884 | 4.162071822 | -1.714664279 | 0.119100225 | 0.119100225 | -4.417298598 |
| 1424177_at   | -0.15678366  | 5.837267423 | -1.714252295 | 0.119177998 | 0.119177998 | -4.417799406 |
| 1457936_at   | 0.401169359  | 7.334981971 | 1.71417721   | 0.119192177 | 0.119192177 | -4.417890673 |
| 1452769_at   | 0.116529698  | 10.88797078 | 1.713957145  | 0.119233744 | 0.119233744 | -4.418158156 |
| 1433415_at   | 0.136534223  | 4.715121846 | 1.713868655  | 0.119250462 | 0.119250462 | -4.41826571  |
| 1420295_x_at | -0.111532706 | 10.5387601  | -1.713506426 | 0.119318919 | 0.119318919 | -4.418705946 |
| 1425040_at   | -0.168515567 | 7.206571002 | -1.713418146 | 0.119335608 | 0.119335608 | -4.418813231 |
| 1452014_a_at | -0.156995493 | 8.962142362 | -1.713401803 | 0.119338698 | 0.119338698 | -4.418833092 |
| 1452983_at   | 0.221361984  | 8.661901238 | 1.713387289  | 0.119341442 | 0.119341442 | -4.418850731 |
| 1418158_at   | 0.242376722  | 8.232329592 | 1.713306694  | 0.119356681 | 0.119356681 | -4.418948673 |
| 1450058_at   | -0.408600839 | 7.585719936 | -1.713250869 | 0.119367238 | 0.119367238 | -4.419016513 |
| 1438333_at   | 0.109363527  | 3.391381613 | 1.713225654  | 0.119372006 | 0.119372006 | -4.419047154 |
| 1442342_at   | 0.108269634  | 5.613419758 | 1.712806953  | 0.119451212 | 0.119451212 | -4.419555935 |
| 1424186_at   | -0.178896866 | 10.23675082 | -1.712736766 | 0.119464494 | 0.119464494 | -4.419641218 |
| 1451844_at   | -0.142332165 | 3.458850046 | -1.712553111 | 0.119499255 | 0.119499255 | -4.419864362 |
| 1425069_at   | -0.130404235 | 3.820873151 | -1.712443966 | 0.119519918 | 0.119519918 | -4.41999697  |
| 1458872_at   | -0.151987251 | 4.355906609 | -1.712432043 | 0.119522175 | 0.119522175 | -4.420011457 |
| 1450346_at   | -0.132037316 | 4.368716662 | -1.712211815 | 0.119563878 | 0.119563878 | -4.420279016 |
| 1445105_at   | 0.13750025   | 4.144383043 | 1.712189431  | 0.119568117 | 0.119568117 | -4.420306209 |
| 1452609_at   | 0.180779004  | 6.054314897 | 1.712162378  | 0.119573241 | 0.119573241 | -4.420339076 |
| 1429582_at   | -0.153749117 | 6.319760107 | -1.712048859 | 0.119594744 | 0.119594744 | -4.420476985 |
| 1434559_at   | 0.133509288  | 6.204061469 | 1.711999597  | 0.119604076 | 0.119604076 | -4.420536829 |
| 1422393_at   | -0.131877095 | 5.102737572 | -1.711880633 | 0.119626616 | 0.119626616 | -4.420681346 |
| 1439139_at   | -0.121811797 | 6.977650931 | -1.711806846 | 0.119640598 | 0.119640598 | -4.42077098  |
| 1435349_at   | -0.168671171 | 9.856646443 | -1.711705687 | 0.119659769 | 0.119659769 | -4.420893863 |
| 1450692_at   | 0.142894581  | 8.161948828 | 1.711665286  | 0.119667427 | 0.119667427 | -4.420942938 |
| 1448601_s_at | 0.412433402  | 9.991266282 | 1.711460995  | 0.119706154 | 0.119706154 | -4.421191086 |
| 1437315_at   | -0.133649038 | 5.704285686 | -1.710959085 | 0.119801348 | 0.119801348 | -4.421800687 |
| 1441355_at   | -0.167336188 | 5.558790772 | -1.710644831 | 0.119860987 | 0.119860987 | -4.422182328 |
| 1437434_a_at | -0.108474259 | 9.570601697 | -1.710446085 | 0.119898718 | 0.119898718 | -4.422423677 |
| 1434449_at   | -0.458026357 | 5.519091358 | -1.710411544 | 0.119905277 | 0.119905277 | -4.42246562  |
| 1449683_x_at | 0.109186939  | 3.212319087 | 1.710404351  | 0.119906643 | 0.119906643 | -4.422474355 |
| 1454792_s_at | 0.117454238  | 10.04417909 | 1.710356268  | 0.119915773 | 0.119915773 | -4.422532742 |
| 1427897_s_at | 0.178245863  | 8.910088599 | 1.710355212  | 0.119915974 | 0.119915974 | -4.422534025 |
| 1419814_s_at | -0.172995857 | 6.809944633 | -1.710218968 | 0.119941849 | 0.119941849 | -4.422699461 |
| 1425140_at   | 0.173543179  | 7.72711404  | 1.710179801  | 0.119949288 | 0.119949288 | -4.422747019 |
| 1422509_at   | 0.199455794  | 10.97421575 | 1.710003735  | 0.119982736 | 0.119982736 | -4.4229608   |
| 1430092_at   | -0.142487119 | 4.617362388 | -1.709972303 | 0.119988708 | 0.119988708 | -4.422998964 |
| 1419267_at   | 0.135106319  | 8.784601242 | 1.709879006  | 0.120006436 | 0.120006436 | -4.423112241 |
| 1442139_at   | 0.180339922  | 4.787706089 | 1.709866671  | 0.12000878  | 0.12000878  | -4.423127217 |
| 1455104_at   | -0.115171227 | 5.807372074 | -1.709865591 | 0.120008985 | 0.120008985 | -4.423128529 |
| 1455992_at   | 0.193245831  | 6.603937058 | 1.709656712  | 0.120048685 | 0.120048685 | -4.423382129 |
| 1429725_at   | -0.154127602 | 5.638105494 | -1.709654253 | 0.120049153 | 0.120049153 | -4.423385115 |
| 1441171_at   | -0.158218537 | 4.096764902 | -1.709598669 | 0.120059719 | 0.120059719 | -4.423452596 |
| 1426044_a_at | 0.171618553  | 6.275594946 | 1.709578173  | 0.120063616 | 0.120063616 | -4.42347748  |
| 1453521_at   | -0.132731144 | 5.064246674 | -1.709434997 | 0.120090838 | 0.120090838 | -4.423651298 |

|                    |              |             |              |             |             |              |
|--------------------|--------------|-------------|--------------|-------------|-------------|--------------|
| 1450290_at         | -0.171106772 | 3.675907844 | -1.709241075 | 0.120127718 | 0.120127718 | -4.423886713 |
| 1432835_at         | -0.1398317   | 3.663041504 | -1.709099032 | 0.120154738 | 0.120154738 | -4.424059141 |
| 1417264_at         | 0.142985318  | 8.121502189 | 1.708950421  | 0.120183013 | 0.120183013 | -4.424239535 |
| 1430732_at         | -0.137205445 | 5.059393448 | -1.708882248 | 0.120195986 | 0.120195986 | -4.424322285 |
| 1460239_at         | 0.15156387   | 8.699316338 | 1.708421228  | 0.120283749 | 0.120283749 | -4.424881847 |
| 1451647_at         | 0.180738486  | 3.266801718 | 1.708244661  | 0.120317377 | 0.120317377 | -4.425096137 |
| 1418943_at         | 0.170750871  | 5.22343965  | 1.708006841  | 0.120362685 | 0.120362685 | -4.42538475  |
| 1428303_at         | -0.14237392  | 3.563852301 | -1.707948232 | 0.120373853 | 0.120373853 | -4.425455873 |
| 1425869_a_at       | 0.148178704  | 6.607783609 | 1.707779806  | 0.120405952 | 0.120405952 | -4.425660258 |
| 1438854_x_at       | 0.136607146  | 5.549077366 | 1.707724406  | 0.120416512 | 0.120416512 | -4.425727483 |
| 1445121_at         | 0.123776089  | 4.023504914 | 1.707473041  | 0.120464436 | 0.120464436 | -4.426032492 |
| 1448242_at         | -0.151730488 | 10.39801247 | -1.70746474  | 0.120466019 | 0.120466019 | -4.426042564 |
| 1429148_at         | -0.198926164 | 6.548713663 | -1.707437393 | 0.120471234 | 0.120471234 | -4.426075746 |
| 1429506_at         | 0.218769362  | 8.50114971  | 1.707294357  | 0.120498514 | 0.120498514 | -4.426249296 |
| 1416213_x_at       | -0.158657476 | 9.613389596 | -1.707194892 | 0.120517487 | 0.120517487 | -4.426369977 |
| 1422891_at         | -0.132541091 | 7.21920066  | -1.707159464 | 0.120524246 | 0.120524246 | -4.42641296  |
| 1437583_x_at       | 0.121075254  | 3.924028949 | 1.707153316  | 0.120525419 | 0.120525419 | -4.42642042  |
| 1445320_at         | -0.140610308 | 4.174173518 | -1.706997988 | 0.120555055 | 0.120555055 | -4.426608871 |
| 1453518_at         | 0.142141417  | 3.946277446 | 1.706690409  | 0.120613761 | 0.120613761 | -4.426982015 |
| 1451305_at         | -0.133903322 | 7.85839505  | -1.706648836 | 0.120621698 | 0.120621698 | -4.427032448 |
| 1446612_at         | 0.196319293  | 4.415120611 | 1.706572165  | 0.120636336 | 0.120636336 | -4.427125456 |
| 1442967_at         | 0.176560418  | 4.43160632  | 1.706523048  | 0.120645715 | 0.120645715 | -4.427185039 |
| 1422566_at         | -0.104482497 | 7.121969035 | -1.706515992 | 0.120647062 | 0.120647062 | -4.427193598 |
| 1457606_x_at       | -0.130621519 | 3.787521207 | -1.706321071 | 0.120684289 | 0.120684289 | -4.427430043 |
| 1429167_at         | 0.11016347   | 8.001587177 | 1.706236613  | 0.120700422 | 0.120700422 | -4.42753249  |
| 1453441_at         | 0.119853781  | 3.314164146 | 1.706154842  | 0.120716044 | 0.120716044 | -4.427631674 |
| 1454896_at         | 0.122469835  | 9.748303391 | 1.706016482  | 0.12074248  | 0.12074248  | -4.427799494 |
| 1457574_at         | 0.13235063   | 5.32252309  | 1.705928861  | 0.120759225 | 0.120759225 | -4.427905768 |
| 1417279_at         | -0.177738939 | 8.308532816 | -1.705829029 | 0.120778306 | 0.120778306 | -4.428026851 |
| 1460119_at         | 0.153841522  | 4.340021686 | 1.705705724  | 0.120801877 | 0.120801877 | -4.428176398 |
| 1454839_a_at       | 0.27352877   | 6.992302544 | 1.705704996  | 0.120802016 | 0.120802016 | -4.428177281 |
| 1439189_at         | -0.110856465 | 7.701519711 | -1.705607604 | 0.120820636 | 0.120820636 | -4.428295396 |
| 1425115_at         | 0.134880331  | 8.383511596 | 1.705604887  | 0.120821156 | 0.120821156 | -4.428298691 |
| 1442051_at         | -0.158182365 | 5.672096202 | -1.705494618 | 0.120842242 | 0.120842242 | -4.428432419 |
| AFFX-r2-Bs-lys-M_a | 0.24840395   | 4.423678966 | 1.70539565   | 0.120861169 | 0.120861169 | -4.42855244  |
| 1426645_at         | -0.122066581 | 12.63587352 | -1.70539488  | 0.120861316 | 0.120861316 | -4.428553373 |
| 1425231_a_at       | 0.129087207  | 9.917852896 | 1.705322244  | 0.12087521  | 0.12087521  | -4.428641459 |
| 1428266_at         | -0.129279669 | 5.980608936 | -1.705008462 | 0.120935244 | 0.120935244 | -4.42902196  |
| 1435560_at         | 0.178263181  | 5.516542091 | 1.704967297  | 0.120943122 | 0.120943122 | -4.429071875 |
| 1442455_at         | 0.151730054  | 4.660054334 | 1.704935189  | 0.120949267 | 0.120949267 | -4.429110807 |
| 1434240_at         | 0.206621724  | 5.528002271 | 1.704713985  | 0.12099161  | 0.12099161  | -4.429379021 |
| 1440336_at         | -0.112875277 | 3.804432795 | -1.704614854 | 0.12101059  | 0.12101059  | -4.429499214 |
| 1438288_x_at       | -0.137381341 | 4.631049445 | -1.704594978 | 0.121014396 | 0.121014396 | -4.429523312 |
| 1417166_at         | 0.132002801  | 9.776126368 | 1.704573675  | 0.121018475 | 0.121018475 | -4.429549141 |
| 1440421_at         | 0.169621541  | 5.577956412 | 1.704485901  | 0.121035284 | 0.121035284 | -4.429655561 |
| 1460148_at         | -0.112533971 | 5.768246222 | -1.704395676 | 0.121052565 | 0.121052565 | -4.429764948 |
| 1423347_at         | -0.113997409 | 10.43035903 | -1.704277963 | 0.121075113 | 0.121075113 | -4.429907659 |
| 1443640_at         | 0.201218725  | 5.520860252 | 1.70423626   | 0.121083102 | 0.121083102 | -4.429958217 |
| 1447395_at         | 0.148332604  | 4.342253436 | 1.70410034   | 0.121109145 | 0.121109145 | -4.430122994 |
| 1459618_at         | 0.140458367  | 5.143323823 | 1.704074719  | 0.121114055 | 0.121114055 | -4.430154054 |
| 1452719_at         | -0.11834401  | 6.569627427 | -1.70395497  | 0.121137003 | 0.121137003 | -4.430299219 |
| 1431117_x_at       | 0.16187592   | 7.763549156 | 1.703926381  | 0.121142483 | 0.121142483 | -4.430333876 |
| 1440697_at         | 0.167675583  | 5.830091172 | 1.703886504  | 0.121150126 | 0.121150126 | -4.430382216 |

|              |              |             |              |             |             |              |
|--------------|--------------|-------------|--------------|-------------|-------------|--------------|
| 1435417_at   | -0.142284086 | 6.685570319 | -1.703867935 | 0.121153686 | 0.121153686 | -4.430404726 |
| 1444242_at   | 0.123509982  | 5.235481615 | 1.703857003  | 0.121155781 | 0.121155781 | -4.430417978 |
| 1440996_at   | 0.134254188  | 6.710229655 | 1.703660135  | 0.121193524 | 0.121193524 | -4.430656615 |
| 1442372_at   | 0.133517681  | 6.25928898  | 1.703606226  | 0.121203861 | 0.121203861 | -4.43072196  |
| 1439047_s_at | 0.181263079  | 7.095814501 | 1.703590496  | 0.121206877 | 0.121206877 | -4.430741028 |
| 1437580_s_at | -0.116887377 | 8.628230853 | -1.703560382 | 0.121212652 | 0.121212652 | -4.430777529 |
| 1415699_a_at | 0.109745021  | 10.5956304  | 1.703459774  | 0.121231947 | 0.121231947 | -4.430899475 |
| 1447477_at   | -0.197080381 | 4.693232747 | -1.702880477 | 0.1213431   | 0.1213431   | -4.431601573 |
| 1430212_at   | 0.180584895  | 4.632892    | 1.702642644  | 0.121388762 | 0.121388762 | -4.431889792 |
| 1448997_at   | -0.212962623 | 5.699712022 | -1.702436938 | 0.121428268 | 0.121428268 | -4.432139062 |
| 1423571_at   | -0.166238021 | 7.28649069  | -1.702313149 | 0.121452047 | 0.121452047 | -4.432289061 |
| 1422967_a_at | 0.252836565  | 4.813401206 | 1.702067406  | 0.121499266 | 0.121499266 | -4.432586819 |
| 1447650_at   | -0.119286998 | 4.576767184 | -1.701948149 | 0.121522187 | 0.121522187 | -4.432731312 |
| 1452170_at   | -0.115546992 | 7.389982432 | -1.701916762 | 0.12152822  | 0.12152822  | -4.432769339 |
| 1456792_at   | 0.1678583    | 5.139976233 | 1.701905337  | 0.121530417 | 0.121530417 | -4.432783182 |
| 1451206_s_at | 0.228540818  | 4.203378986 | 1.701761665  | 0.121558037 | 0.121558037 | -4.432957248 |
| 1458857_at   | -0.1120078   | 5.533008866 | -1.701597252 | 0.121589652 | 0.121589652 | -4.433156434 |
| 1417491_at   | 0.146431481  | 6.946694065 | 1.701457289  | 0.121616571 | 0.121616571 | -4.433325993 |
| 1426774_at   | 0.139512355  | 7.917329942 | 1.701433901  | 0.12162107  | 0.12162107  | -4.433354325 |
| 1440675_at   | -0.232131219 | 6.753079491 | -1.701290821 | 0.121648595 | 0.121648595 | -4.433527653 |
| 1429176_at   | 0.117511099  | 7.2773503   | 1.701276541  | 0.121651343 | 0.121651343 | -4.433544951 |
| 1428081_at   | -0.124264275 | 6.287422145 | -1.701214475 | 0.121663285 | 0.121663285 | -4.433620135 |
| 1450787_at   | -0.172687881 | 5.310097605 | -1.70118626  | 0.121668714 | 0.121668714 | -4.433654314 |
| 1434975_x_at | -0.284742459 | 9.778316637 | -1.701101657 | 0.121684995 | 0.121684995 | -4.433756796 |
| 1429178_at   | 0.109144514  | 10.63689021 | 1.701083706  | 0.121688449 | 0.121688449 | -4.433778539 |
| 1428539_at   | -0.125928657 | 8.994982781 | -1.701072945 | 0.12169052  | 0.12169052  | -4.433791574 |
| 1445036_at   | 0.122001523  | 3.601941124 | 1.700955483  | 0.121713129 | 0.121713129 | -4.433933855 |
| 1418260_at   | 0.17135427   | 8.350650085 | 1.70075561   | 0.121751608 | 0.121751608 | -4.434175948 |
| 1460091_at   | -0.123010175 | 5.046478169 | -1.700623587 | 0.12177703  | 0.12177703  | -4.434335851 |
| 1438194_at   | -0.149665604 | 4.754706477 | -1.700219842 | 0.121854807 | 0.121854807 | -4.434824824 |
| 1415905_at   | -0.150710793 | 4.11399465  | -1.700201346 | 0.121858371 | 0.121858371 | -4.434847224 |
| 1420832_at   | -0.144787424 | 7.216864663 | -1.700154226 | 0.121867451 | 0.121867451 | -4.434904287 |
| 1422637_at   | 0.128377825  | 4.375307997 | 1.699909023  | 0.121914713 | 0.121914713 | -4.43520122  |
| 1431506_s_at | -0.130990956 | 9.359640313 | -1.699906852 | 0.121915132 | 0.121915132 | -4.435203849 |
| 1442876_at   | -0.147946032 | 5.24482072  | -1.699878847 | 0.12192053  | 0.12192053  | -4.435237761 |
| 1439002_s_at | -0.140790154 | 4.685747052 | -1.699618409 | 0.121970749 | 0.121970749 | -4.435553119 |
| 1446223_at   | -0.153163761 | 5.076976616 | -1.699513638 | 0.121990957 | 0.121990957 | -4.435679978 |
| 1442016_at   | -0.14389177  | 4.39095177  | -1.699236336 | 0.122044456 | 0.122044456 | -4.436015722 |
| 1419492_s_at | -0.138127479 | 4.673180594 | -1.699155058 | 0.122060141 | 0.122060141 | -4.436114125 |
| 1459457_at   | 0.162145013  | 6.334441071 | 1.698917796  | 0.122105938 | 0.122105938 | -4.436401365 |
| 1445676_at   | -0.280058992 | 4.661673228 | -1.698668622 | 0.12215405  | 0.12215405  | -4.436703006 |
| 1441904_x_at | -0.119241818 | 7.864565746 | -1.698515937 | 0.122183541 | 0.122183541 | -4.436887831 |
| 1457139_at   | 0.116460991  | 9.713610651 | 1.698487054  | 0.12218912  | 0.12218912  | -4.436922793 |
| 1422057_at   | -0.168743855 | 4.070443291 | -1.698215829 | 0.122241524 | 0.122241524 | -4.43725109  |
| 1460386_a_at | 0.192012255  | 4.915193394 | 1.698107139  | 0.12226253  | 0.12226253  | -4.437382644 |
| 1441318_at   | -0.12239721  | 4.7993171   | -1.697936823 | 0.122295453 | 0.122295453 | -4.43758878  |
| 1434781_at   | -0.131871905 | 6.527185425 | -1.697529492 | 0.122374224 | 0.122374224 | -4.438081741 |
| 1454037_a_at | 0.187026432  | 5.673415114 | 1.697390316  | 0.122401149 | 0.122401149 | -4.438250162 |
| 1456474_at   | -0.174486031 | 3.663375672 | -1.697259483 | 0.122426464 | 0.122426464 | -4.438408481 |
| 1441867_x_at | -0.250116791 | 7.762604846 | -1.697239574 | 0.122430317 | 0.122430317 | -4.438432572 |
| 1445860_at   | 0.187622545  | 5.50816639  | 1.697054799  | 0.12246608  | 0.12246608  | -4.438656155 |
| 1430035_at   | 0.147770425  | 6.838503204 | 1.696900433  | 0.122495964 | 0.122495964 | -4.438842934 |
| 1451314_a_at | -0.144265482 | 7.251543888 | -1.696715718 | 0.122531733 | 0.122531733 | -4.439066424 |



|              |              |             |              |             |             |              |
|--------------|--------------|-------------|--------------|-------------|-------------|--------------|
| 1455380_at   | -0.136342873 | 4.813081523 | -1.696632551 | 0.12254784  | 0.12254784  | -4.439167046 |
| 1454451_at   | 0.121611472  | 3.997135966 | 1.696517044  | 0.122570215 | 0.122570215 | -4.439306792 |
| 1443221_at   | -0.164541382 | 3.254503554 | -1.696461214 | 0.122581031 | 0.122581031 | -4.439374336 |
| 1442900_at   | 0.139019771  | 3.955959559 | 1.696256129  | 0.122620769 | 0.122620769 | -4.439622442 |
| 1454970_at   | -0.152809822 | 5.35161369  | -1.696246216 | 0.12262269  | 0.12262269  | -4.439634434 |
| 1443571_at   | -0.13543854  | 3.250049171 | -1.696178918 | 0.122635733 | 0.122635733 | -4.439715846 |
| 1425928_at   | 0.123639818  | 5.919084948 | 1.696011142  | 0.122668255 | 0.122668255 | -4.439918803 |
| 1456823_at   | -0.55456362  | 6.735368964 | -1.695988985 | 0.12267255  | 0.12267255  | -4.439945605 |
| 1431843_a_at | 0.177589933  | 4.557591301 | 1.695772512  | 0.122714524 | 0.122714524 | -4.440207455 |
| 1429837_at   | -0.120174462 | 5.697081103 | -1.695579689 | 0.122751923 | 0.122751923 | -4.440440684 |
| 1453232_at   | 0.151257672  | 3.980687375 | 1.69543761   | 0.122779487 | 0.122779487 | -4.440612527 |
| 1442332_at   | 0.192357992  | 7.703022568 | 1.695245989  | 0.122816671 | 0.122816671 | -4.440844281 |
| 1426252_a_at | 0.135451427  | 3.204006888 | 1.695109652  | 0.122843133 | 0.122843133 | -4.441009166 |
| 1427528_a_at | 0.113905213  | 7.698855218 | 1.695051724  | 0.122854379 | 0.122854379 | -4.441079221 |
| 1426021_a_at | 0.112973357  | 7.334155563 | 1.694767809  | 0.122909506 | 0.122909506 | -4.44142256  |
| 1428879_at   | 0.105395333  | 6.052293317 | 1.694680965  | 0.122926373 | 0.122926373 | -4.441527575 |
| 1431722_a_at | -0.134783922 | 4.886604119 | -1.69465242  | 0.122931918 | 0.122931918 | -4.441562093 |
| 1459181_at   | -0.147983648 | 3.870859516 | -1.694648055 | 0.122932766 | 0.122932766 | -4.441567371 |
| 1432710_at   | -0.128741858 | 4.036386938 | -1.694632017 | 0.122935881 | 0.122935881 | -4.441586764 |
| 1427728_at   | -0.225358463 | 3.805716431 | -1.694491584 | 0.122963162 | 0.122963162 | -4.441756573 |
| 1452436_at   | 0.188361779  | 7.090628336 | 1.693982493  | 0.123062108 | 0.123062108 | -4.442372105 |
| 1426871_at   | 0.178568999  | 8.323626877 | 1.69391658   | 0.123074924 | 0.123074924 | -4.442451793 |
| 1426474_at   | -0.126064422 | 7.944101827 | -1.693913878 | 0.12307545  | 0.12307545  | -4.44245506  |
| 1453350_at   | -0.150726317 | 4.162059166 | -1.693739875 | 0.123109288 | 0.123109288 | -4.442665419 |
| 1455523_at   | -0.114384507 | 6.009848583 | -1.693603024 | 0.123135908 | 0.123135908 | -4.442830858 |
| 1444325_at   | 0.127559685  | 4.004485846 | 1.693536863  | 0.123148779 | 0.123148779 | -4.442910837 |
| 1450331_s_at | -0.162962957 | 4.270075616 | -1.693510979 | 0.123153815 | 0.123153815 | -4.442942128 |
| 1457926_at   | 0.1859344    | 3.802430568 | 1.693506861  | 0.123154616 | 0.123154616 | -4.442947105 |
| 1422251_at   | 0.129509228  | 5.598688406 | 1.693439821  | 0.12316766  | 0.12316766  | -4.443028145 |
| 1427877_at   | 0.159690726  | 10.60360478 | 1.693248062  | 0.123204978 | 0.123204978 | -4.443259941 |
| 1454470_at   | -0.22072405  | 5.008976098 | -1.692959103 | 0.123261231 | 0.123261231 | -4.443609209 |
| 1423117_at   | 0.1139155    | 9.603139997 | 1.692928071  | 0.123267273 | 0.123267273 | -4.443646716 |
| 1450050_at   | 0.257932833  | 6.390878077 | 1.692809004  | 0.123290461 | 0.123290461 | -4.443790624 |
| 1451708_at   | 0.149703186  | 4.129603628 | 1.692566198  | 0.123337757 | 0.123337757 | -4.444084073 |
| 1436569_at   | 0.289797519  | 5.479311113 | 1.692444185  | 0.12336153  | 0.12336153  | -4.444231527 |
| 1422230_s_at | 0.185831394  | 3.988508062 | 1.692321371  | 0.123385463 | 0.123385463 | -4.444379944 |
| 1455345_at   | 0.144249981  | 7.201988002 | 1.692142126  | 0.123420402 | 0.123420402 | -4.444596548 |
| 1447003_at   | -0.263078722 | 4.91619271  | -1.692046009 | 0.12343914  | 0.12343914  | -4.444712693 |
| 1453488_at   | -0.106716177 | 4.187862605 | -1.692031934 | 0.123441884 | 0.123441884 | -4.444729701 |
| 1446950_at   | -0.146604389 | 7.332527665 | -1.691965315 | 0.123454874 | 0.123454874 | -4.444810201 |
| 1460314_s_at | -0.137175322 | 8.111929165 | -1.691912026 | 0.123465265 | 0.123465265 | -4.444874591 |
| 1440438_at   | 0.122602855  | 5.991613686 | 1.691828997  | 0.123481457 | 0.123481457 | -4.444974914 |
| 1437513_a_at | 0.105382511  | 9.872644681 | 1.691774242  | 0.123492137 | 0.123492137 | -4.445041074 |
| 1459814_at   | 0.120058345  | 3.449712817 | 1.691390152  | 0.123567073 | 0.123567073 | -4.445505136 |
| 1427121_at   | 0.188889781  | 6.353069279 | 1.690815545  | 0.123679255 | 0.123679255 | -4.446199291 |
| 1432143_a_at | 0.109688677  | 9.390350929 | 1.690760817  | 0.123689945 | 0.123689945 | -4.4462654   |
| 1423695_at   | -0.124202774 | 7.727204693 | -1.690665545 | 0.123708556 | 0.123708556 | -4.446380481 |
| 1446485_at   | -0.140360065 | 3.3982237   | -1.690547166 | 0.123731684 | 0.123731684 | -4.44652347  |
| 1459909_at   | -0.259169156 | 4.935634    | -1.69045923  | 0.123748867 | 0.123748867 | -4.446629684 |
| 1434283_at   | 0.152879306  | 9.883681823 | 1.690292353  | 0.123781481 | 0.123781481 | -4.446831239 |
| 1456947_at   | 0.130849698  | 8.631441663 | 1.69027779   | 0.123784327 | 0.123784327 | -4.446848829 |
| 1446855_at   | 0.13447097   | 5.007911525 | 1.690254838  | 0.123788814 | 0.123788814 | -4.446876549 |
| 1431617_at   | 0.135229998  | 3.50309046  | 1.690182181  | 0.123803017 | 0.123803017 | -4.446964302 |

|              |              |             |              |             |             |              |
|--------------|--------------|-------------|--------------|-------------|-------------|--------------|
| 1447675_x_at | -0.177004568 | 3.195502089 | -1.690176415 | 0.123804144 | 0.123804144 | -4.446971265 |
| 1433040_at   | 0.151655833  | 4.508062835 | 1.690157821  | 0.123807779 | 0.123807779 | -4.446993723 |
| 1453590_at   | 0.319048397  | 5.942478463 | 1.690121279  | 0.123814923 | 0.123814923 | -4.447037855 |
| 1417018_at   | -0.204662236 | 10.12311106 | -1.689852853 | 0.123867413 | 0.123867413 | -4.44736203  |
| 1434828_at   | 0.132345415  | 9.512276133 | 1.689802047  | 0.12387735  | 0.12387735  | -4.447423385 |
| 1431000_at   | -0.182766844 | 6.165833714 | -1.689776346 | 0.123882377 | 0.123882377 | -4.447454422 |
| 1448956_at   | 0.127111625  | 8.298846302 | 1.689701028  | 0.123897111 | 0.123897111 | -4.447545377 |
| 1439719_at   | -0.114523569 | 3.380001938 | -1.689646006 | 0.123907875 | 0.123907875 | -4.44761182  |
| 1433847_at   | -0.127613704 | 3.475958274 | -1.689562007 | 0.12392431  | 0.12392431  | -4.447713254 |
| 1448145_at   | -0.154351343 | 8.645389488 | -1.689540065 | 0.123928603 | 0.123928603 | -4.447739749 |
| 1450638_at   | 0.108840405  | 11.23565184 | 1.689530901  | 0.123930396 | 0.123930396 | -4.447750815 |
| 1458809_at   | -0.111323357 | 6.026395792 | -1.68938154  | 0.123959626 | 0.123959626 | -4.44793117  |
| 1448719_at   | -0.109340732 | 4.499767738 | -1.688940911 | 0.124045891 | 0.124045891 | -4.448463191 |
| 1449745_at   | -0.137632601 | 5.171764315 | -1.6888817   | 0.124057488 | 0.124057488 | -4.448534679 |
| 1437325_x_at | -0.125001977 | 10.08685449 | -1.688812706 | 0.124071001 | 0.124071001 | -4.448617976 |
| 1427043_s_at | 0.142395126  | 6.00219356  | 1.688725974  | 0.124087991 | 0.124087991 | -4.448722687 |
| 1451555_at   | 0.11342966   | 7.699291631 | 1.688584997  | 0.124115611 | 0.124115611 | -4.448892881 |
| 1434995_s_at | 0.130826665  | 7.708072883 | 1.688554449  | 0.124121597 | 0.124121597 | -4.448929759 |
| 1429682_at   | 0.191933488  | 4.888881265 | 1.688502273  | 0.124131821 | 0.124131821 | -4.448992746 |
| 1430179_at   | -0.130588028 | 4.012297091 | -1.688428714 | 0.124146237 | 0.124146237 | -4.449081545 |
| 1452839_at   | 0.139573371  | 7.684699891 | 1.688397924  | 0.124152271 | 0.124152271 | -4.449118713 |
| 1427241_at   | 0.130966444  | 8.038839212 | 1.688352151  | 0.124161243 | 0.124161243 | -4.449173969 |
| 1422416_s_at | 0.136674374  | 4.52989599  | 1.688300644  | 0.124171339 | 0.124171339 | -4.449236145 |
| 1440195_at   | 0.132655669  | 6.765460755 | 1.688149989  | 0.124200873 | 0.124200873 | -4.449418001 |
| 1457008_at   | -0.130166182 | 4.700396056 | -1.688016901 | 0.12422697  | 0.12422697  | -4.449578647 |
| 1439446_at   | -0.218244804 | 4.652221191 | -1.687916817 | 0.124246597 | 0.124246597 | -4.44969945  |
| 1449897_a_at | -0.108381279 | 9.012961368 | -1.687780046 | 0.124273425 | 0.124273425 | -4.44986453  |
| 1416812_at   | 0.109099035  | 10.6479718  | 1.687758455  | 0.12427766  | 0.12427766  | -4.449890589 |
| 1443187_at   | -0.122276114 | 4.338106707 | -1.687583629 | 0.12431196  | 0.12431196  | -4.45010159  |
| 1455307_at   | 0.159588312  | 7.979821998 | 1.687368604  | 0.12435416  | 0.12435416  | -4.450361095 |
| 1422167_at   | -0.206870286 | 5.313029858 | -1.687328234 | 0.124362084 | 0.124362084 | -4.450409814 |
| 1430105_at   | -0.139843286 | 3.505392226 | -1.687211607 | 0.124384979 | 0.124384979 | -4.450550558 |
| 1428037_at   | -0.127362866 | 4.486403925 | -1.687008519 | 0.124424856 | 0.124424856 | -4.450795632 |
| 1447890_at   | -0.272622946 | 4.136487169 | -1.686908209 | 0.124444557 | 0.124444557 | -4.450916675 |
| 1444608_at   | -0.146660652 | 3.445149629 | -1.68675721  | 0.124474218 | 0.124474218 | -4.451098877 |
| 1433202_at   | -0.129847082 | 4.091140892 | -1.686461386 | 0.124532346 | 0.124532346 | -4.451455809 |
| 1429051_s_at | 0.191738749  | 10.21143596 | 1.686334428  | 0.1245573   | 0.1245573   | -4.451608984 |
| 1446692_at   | 0.262601734  | 4.40469328  | 1.68630191   | 0.124563692 | 0.124563692 | -4.451648217 |
| 1420764_at   | -0.129579219 | 3.853581721 | -1.686167406 | 0.124590136 | 0.124590136 | -4.451810489 |
| 1427593_at   | 0.138941407  | 5.179350946 | 1.686001363  | 0.124622787 | 0.124622787 | -4.452010803 |
| 1431164_at   | 0.107540882  | 3.535567535 | 1.685976076  | 0.124627761 | 0.124627761 | -4.452041308 |
| 1445733_at   | -0.149585497 | 4.179282615 | -1.685938317 | 0.124635187 | 0.124635187 | -4.452086859 |
| 1443589_at   | 0.151569178  | 4.701632756 | 1.685935421  | 0.124635757 | 0.124635757 | -4.452090353 |
| 1429163_at   | -0.198542948 | 8.558280753 | -1.685732937 | 0.124675588 | 0.124675588 | -4.452334612 |
| 1444455_at   | -0.101521891 | 4.609446303 | -1.685641519 | 0.124693575 | 0.124693575 | -4.452444886 |
| 1458038_at   | 0.129904086  | 4.738621731 | 1.685517392  | 0.124718002 | 0.124718002 | -4.452594612 |
| 1426781_at   | -0.124391491 | 6.394534425 | -1.685352138 | 0.124750528 | 0.124750528 | -4.452793938 |
| 1445159_at   | 0.208683524  | 4.42057354  | 1.685325816  | 0.12475571  | 0.12475571  | -4.452825687 |
| 1443939_at   | -0.143330301 | 7.173383874 | -1.685279515 | 0.124764825 | 0.124764825 | -4.452881533 |
| 1443341_at   | 0.23013879   | 4.03406752  | 1.685048328  | 0.124810346 | 0.124810346 | -4.453160365 |
| 1427853_a_at | -0.12852679  | 6.260676891 | -1.68502953  | 0.124814048 | 0.124814048 | -4.453183036 |
| 1417413_at   | -0.140315945 | 4.597221869 | -1.684987179 | 0.124822389 | 0.124822389 | -4.453234114 |
| 1443177_at   | -0.138702539 | 3.9598334   | -1.68486751  | 0.12484596  | 0.12484596  | -4.453378436 |

|              |              |             |              |             |             |              |
|--------------|--------------|-------------|--------------|-------------|-------------|--------------|
| 1433143_at   | -0.108935543 | 3.425373878 | -1.68444789  | 0.124928644 | 0.124928644 | -4.453884466 |
| 1422446_x_at | -0.127272237 | 6.260685871 | -1.684409824 | 0.124936147 | 0.124936147 | -4.453930367 |
| 1423132_a_at | 0.130962604  | 11.13604919 | 1.684347502  | 0.124948433 | 0.124948433 | -4.454005517 |
| 1453912_at   | 0.111738299  | 3.947685951 | 1.684258687  | 0.124965942 | 0.124965942 | -4.454112612 |
| 1443947_at   | -0.163301559 | 5.05814868  | -1.68417421  | 0.124982599 | 0.124982599 | -4.454214472 |
| 1439852_at   | -0.113242165 | 10.08884307 | -1.684013305 | 0.12501433  | 0.12501433  | -4.454408482 |
| 1453286_at   | -0.129068306 | 7.608148028 | -1.683638106 | 0.125088349 | 0.125088349 | -4.45486084  |
| 1424865_at   | -0.13764746  | 3.955189795 | -1.68351163  | 0.125113309 | 0.125113309 | -4.455013315 |
| 1421821_at   | 0.195966383  | 8.936316869 | 1.683409177  | 0.125133532 | 0.125133532 | -4.455136825 |
| 1455921_at   | 0.14292853   | 3.416105959 | 1.683133689  | 0.125187924 | 0.125187924 | -4.455468916 |
| 1456881_at   | 0.183148807  | 4.068574119 | 1.683095779  | 0.12519541  | 0.12519541  | -4.455514613 |
| 1441155_at   | 0.142256368  | 7.29958508  | 1.682713928  | 0.125270841 | 0.125270841 | -4.455974875 |
| 1445169_at   | 0.208658972  | 7.606030817 | 1.682584317  | 0.125296454 | 0.125296454 | -4.456131089 |
| 1439124_at   | -0.116120463 | 5.758850696 | -1.682405515 | 0.125331795 | 0.125331795 | -4.456346583 |
| 1439911_at   | -0.148068609 | 5.783657196 | -1.682332627 | 0.125346205 | 0.125346205 | -4.456434425 |
| 1445783_at   | 0.122713988  | 3.508156417 | 1.682273843  | 0.125357827 | 0.125357827 | -4.456505268 |
| 1447612_x_at | 0.133288299  | 9.39202424  | 1.682089364  | 0.125394307 | 0.125394307 | -4.456727584 |
| 1421260_a_at | -0.134596594 | 10.60152536 | -1.682036286 | 0.125404805 | 0.125404805 | -4.456791547 |
| 1442318_at   | -0.148842395 | 4.42941133  | -1.68199456  | 0.125413058 | 0.125413058 | -4.456841828 |
| 1432302_s_at | 0.106391113  | 3.188984804 | 1.681746198  | 0.125462192 | 0.125462192 | -4.457141103 |
| 1446449_at   | -0.154042985 | 4.435311251 | -1.681587523 | 0.125493592 | 0.125493592 | -4.457332296 |
| 1441845_at   | -0.290139548 | 4.10581372  | -1.681542512 | 0.125502501 | 0.125502501 | -4.45738653  |
| 1450011_at   | 0.154272078  | 10.10490799 | 1.68152366   | 0.125506232 | 0.125506232 | -4.457409244 |
| 1429115_at   | -0.130088184 | 7.912620201 | -1.681200811 | 0.125570149 | 0.125570149 | -4.457798222 |
| 1456451_at   | -0.127358205 | 5.383567309 | -1.681070165 | 0.125596022 | 0.125596022 | -4.457955618 |
| 1446506_at   | 0.206526423  | 4.261854641 | 1.681027139  | 0.125604544 | 0.125604544 | -4.458007453 |
| 1428956_at   | 0.194176812  | 5.616771058 | 1.680948554  | 0.12562011  | 0.12562011  | -4.458102124 |
| 1457444_at   | 0.144546051  | 3.859141257 | 1.680850701  | 0.125639496 | 0.125639496 | -4.458220006 |
| 1454158_at   | 0.197208466  | 7.317099294 | 1.680810588  | 0.125647443 | 0.125647443 | -4.458268328 |
| 1456701_at   | 0.140059053  | 3.464944656 | 1.680677165  | 0.125673881 | 0.125673881 | -4.458429052 |
| 1431628_at   | -0.149785359 | 3.896233775 | -1.680526407 | 0.125703761 | 0.125703761 | -4.458610652 |
| 1440967_at   | -0.164076826 | 3.63941387  | -1.680306468 | 0.125747362 | 0.125747362 | -4.458875572 |
| 1455916_at   | 0.118452347  | 8.173077365 | 1.680192471  | 0.125769967 | 0.125769967 | -4.459012876 |
| 1457533_at   | 0.207856961  | 5.321471812 | 1.680092315  | 0.125789831 | 0.125789831 | -4.459133507 |
| 1451711_at   | -0.129186739 | 4.728703758 | -1.679519831 | 0.125903422 | 0.125903422 | -4.459822956 |
| 1442356_at   | -0.182143173 | 4.404636315 | -1.679485287 | 0.125910279 | 0.125910279 | -4.459864554 |
| 1453135_at   | -0.350393208 | 6.118471019 | -1.679334916 | 0.125940132 | 0.125940132 | -4.460045627 |
| 1423233_at   | 0.137046507  | 7.376765382 | 1.679250678  | 0.125956859 | 0.125956859 | -4.460147062 |
| 1437199_at   | 0.180392526  | 5.518046718 | 1.679129975  | 0.125980829 | 0.125980829 | -4.4602924   |
| 1428976_at   | 0.121263668  | 9.546119926 | 1.679085151  | 0.125989732 | 0.125989732 | -4.460346372 |
| 1419150_at   | -0.137380412 | 4.065267981 | -1.679053131 | 0.125996092 | 0.125996092 | -4.460384926 |
| 1420673_a_at | -0.194349596 | 5.260409343 | -1.679010498 | 0.126004561 | 0.126004561 | -4.460436259 |
| 1435604_at   | -0.114822972 | 6.557858511 | -1.678982838 | 0.126010055 | 0.126010055 | -4.460469563 |
| 1427363_at   | -0.126425543 | 7.263675131 | -1.678898408 | 0.126026828 | 0.126026828 | -4.460571218 |
| 1419672_at   | 0.577151144  | 6.756944484 | 1.678872163  | 0.126032043 | 0.126032043 | -4.460602817 |
| 1434543_a_at | 0.113703655  | 9.547241336 | 1.678498904  | 0.126106223 | 0.126106223 | -4.461052197 |
| 1446339_at   | -0.117979881 | 4.169868034 | -1.678423844 | 0.126121145 | 0.126121145 | -4.461142558 |
| 1438398_at   | 0.282197624  | 7.506326146 | 1.677837162  | 0.126237832 | 0.126237832 | -4.461848778 |
| 1436599_at   | 0.118136833  | 6.742801789 | 1.677789715  | 0.126247273 | 0.126247273 | -4.461905887 |
| 1454865_at   | 0.137818286  | 6.714665756 | 1.677508872  | 0.12630317  | 0.12630317  | -4.462243906 |
| 1432125_at   | -0.235883964 | 4.622116652 | -1.677264692 | 0.126351787 | 0.126351787 | -4.462537777 |
| 1451533_at   | -0.176879141 | 5.368746809 | -1.677146475 | 0.126375331 | 0.126375331 | -4.462680045 |
| 1451016_at   | -0.153391546 | 7.832272986 | -1.677019082 | 0.126400707 | 0.126400707 | -4.46283335  |

|              |              |             |              |             |             |              |
|--------------|--------------|-------------|--------------|-------------|-------------|--------------|
| 1451299_at   | 0.11284434   | 8.013155365 | 1.67693787   | 0.126416886 | 0.126416886 | -4.462931077 |
| 1447672_x_at | -0.125453755 | 7.795066366 | -1.676904871 | 0.12642346  | 0.12642346  | -4.462970786 |
| 1425202_a_at | 0.143473577  | 7.376730857 | 1.676687728  | 0.126466731 | 0.126466731 | -4.463232075 |
| 1448290_at   | 0.158209211  | 3.454215162 | 1.676508436  | 0.126502469 | 0.126502469 | -4.463447806 |
| 1426366_at   | 0.193287065  | 9.042344354 | 1.676495038  | 0.12650514  | 0.12650514  | -4.463463926 |
| 1444681_at   | -0.142561973 | 3.662613501 | -1.676492244 | 0.126505698 | 0.126505698 | -4.463467289 |
| 1460280_at   | -0.128106081 | 3.72179629  | -1.676287164 | 0.126546588 | 0.126546588 | -4.463714033 |
| 1455888_at   | -0.189343441 | 4.341450822 | -1.676157935 | 0.126572361 | 0.126572361 | -4.463869511 |
| 1446051_at   | -0.123177639 | 3.596162858 | -1.676137622 | 0.126576413 | 0.126576413 | -4.463893949 |
| 1415853_at   | -0.153800248 | 7.800565828 | -1.676093157 | 0.126585282 | 0.126585282 | -4.463947444 |
| 1429251_at   | 0.183828097  | 7.934091292 | 1.676079862  | 0.126587934 | 0.126587934 | -4.463963439 |
| 1443344_at   | -0.172074199 | 4.415939263 | -1.675829243 | 0.126637936 | 0.126637936 | -4.464264938 |
| 1446155_at   | -0.195429414 | 3.689582238 | -1.675669245 | 0.126669867 | 0.126669867 | -4.464457409 |
| 1454924_at   | -0.211626104 | 7.461227167 | -1.675500422 | 0.126703567 | 0.126703567 | -4.464660485 |
| 1439181_at   | 0.236824549  | 5.672357257 | 1.675414252  | 0.126720771 | 0.126720771 | -4.464764135 |
| 1449353_at   | 0.120094329  | 7.958372078 | 1.675361941  | 0.126731216 | 0.126731216 | -4.464827056 |
| 1419793_at   | -0.116334877 | 3.918696348 | -1.675068144 | 0.126789894 | 0.126789894 | -4.465180427 |
| 1431545_at   | 0.121594579  | 5.809350773 | 1.674974409  | 0.126808621 | 0.126808621 | -4.465293164 |
| 1455138_x_at | 0.117465918  | 12.28234508 | 1.674770639  | 0.126849338 | 0.126849338 | -4.465538229 |
| 1439763_at   | -0.108866836 | 4.026956555 | -1.674715444 | 0.12686037  | 0.12686037  | -4.465604607 |
| 1441509_at   | -0.160749425 | 5.149804331 | -1.674699942 | 0.126863468 | 0.126863468 | -4.465623251 |
| 1456110_at   | 0.322295924  | 8.28667567  | 1.674682636  | 0.126866927 | 0.126866927 | -4.465644063 |
| 1435448_at   | 0.118585595  | 8.389770757 | 1.674679811  | 0.126867492 | 0.126867492 | -4.46564746  |
| 1459489_at   | -0.175417255 | 4.563848311 | -1.674474519 | 0.126908531 | 0.126908531 | -4.465894335 |
| 1439759_x_at | -0.124830672 | 3.349217839 | -1.674240857 | 0.126955256 | 0.126955256 | -4.466175311 |
| 1429571_a_at | 0.262977001  | 5.250737217 | 1.67386873   | 0.127029701 | 0.127029701 | -4.466622749 |
| 1444277_at   | -0.187662108 | 4.067636154 | -1.673802251 | 0.127043005 | 0.127043005 | -4.466702678 |
| 1434858_x_at | 0.140833456  | 5.57401685  | 1.673605229  | 0.12708244  | 0.12708244  | -4.466939551 |
| 1440966_at   | 0.319892185  | 9.164646972 | 1.673438071  | 0.127115906 | 0.127115906 | -4.467140508 |
| 1433529_at   | -0.182051719 | 5.95972644  | -1.673331391 | 0.127137268 | 0.127137268 | -4.467268754 |
| 1425863_a_at | 0.179920019  | 3.992119743 | 1.673264496  | 0.127150665 | 0.127150665 | -4.46734917  |
| 1458554_at   | -0.113954005 | 3.161102103 | -1.673109193 | 0.127181773 | 0.127181773 | -4.467535859 |
| 1460230_at   | 0.285703477  | 6.038189728 | 1.673071897  | 0.127189244 | 0.127189244 | -4.467580691 |
| 1443298_at   | -0.129413602 | 3.383490877 | -1.672915131 | 0.127220654 | 0.127220654 | -4.467769127 |
| 1425489_at   | 0.10646295   | 6.555774985 | 1.672827926  | 0.127238129 | 0.127238129 | -4.467873946 |
| 1417503_at   | -0.140025287 | 9.84032106  | -1.672616827 | 0.127280441 | 0.127280441 | -4.468127673 |
| 1457888_at   | -0.110525263 | 4.824465116 | -1.672539712 | 0.1272959   | 0.1272959   | -4.468220357 |
| 1448729_a_at | -0.251438314 | 6.101758193 | -1.67243746  | 0.127316402 | 0.127316402 | -4.468343249 |
| 1444057_at   | -0.16224687  | 6.493586896 | -1.672133027 | 0.127377459 | 0.127377459 | -4.468709112 |
| 1435937_at   | 0.152310332  | 7.625476429 | 1.671987066  | 0.127406743 | 0.127406743 | -4.468884516 |
| 1425580_a_at | 0.105907142  | 7.353418736 | 1.671813118  | 0.127441649 | 0.127441649 | -4.469093541 |
| 1447230_at   | 0.127119447  | 3.591173848 | 1.671696335  | 0.127465089 | 0.127465089 | -4.469233868 |
| 1441670_at   | -0.121740123 | 6.731603724 | -1.671687118 | 0.127466939 | 0.127466939 | -4.469244943 |
| 1426480_at   | 0.129141769  | 8.63161226  | 1.67159184   | 0.127486065 | 0.127486065 | -4.469359427 |
| 1416563_at   | 0.119033339  | 10.0300671  | 1.671587821  | 0.127486872 | 0.127486872 | -4.469364255 |
| 1419760_a_at | 0.10608556   | 7.264514135 | 1.67148101   | 0.127508317 | 0.127508317 | -4.469492593 |
| 1429632_at   | 0.168879024  | 6.284194063 | 1.671404156  | 0.12752375  | 0.12752375  | -4.469584933 |
| 1452511_at   | -0.105167417 | 4.298978276 | -1.671293102 | 0.127546052 | 0.127546052 | -4.46971836  |
| 1442007_at   | 0.102415071  | 7.600666123 | 1.671090192  | 0.127586811 | 0.127586811 | -4.46996214  |
| 1439555_at   | 0.354076526  | 6.343677596 | 1.670693838  | 0.127666462 | 0.127666462 | -4.470438287 |
| 1458106_at   | 0.154407017  | 4.908798996 | 1.670689969  | 0.12766724  | 0.12766724  | -4.470442935 |
| 1432826_a_at | 0.158559791  | 3.794357193 | 1.670597863  | 0.127685756 | 0.127685756 | -4.470553575 |
| 1458515_at   | -0.155672515 | 5.166028275 | -1.670472344 | 0.127710993 | 0.127710993 | -4.470704348 |

|                |              |             |              |             |             |              |
|----------------|--------------|-------------|--------------|-------------|-------------|--------------|
| 1423547_at     | 0.218698719  | 8.186204766 | 1.670450923  | 0.1277153   | 0.1277153   | -4.470730077 |
| 1431076_at     | 0.216919132  | 5.698660595 | 1.67038894   | 0.127727765 | 0.127727765 | -4.470804529 |
| 1416236_a_at   | 0.249129756  | 7.417546399 | 1.670379486  | 0.127729666 | 0.127729666 | -4.470815885 |
| 1459951_at     | 0.255387069  | 6.758433688 | 1.670301107  | 0.12774543  | 0.12774543  | -4.470910028 |
| 1420709_s_at   | -0.159015264 | 5.316376125 | -1.670201836 | 0.127765397 | 0.127765397 | -4.471029262 |
| 1422160_at     | 0.125255843  | 3.908511428 | 1.670200107  | 0.127765745 | 0.127765745 | -4.471031339 |
| 1425527_at     | -0.134422577 | 9.008765199 | -1.67010471  | 0.127784936 | 0.127784936 | -4.471145917 |
| 1448955_s_at   | 0.457449052  | 5.456366027 | 1.670076634  | 0.127790585 | 0.127790585 | -4.471179638 |
| 1417781_at     | 0.175196647  | 7.032833061 | 1.669936056  | 0.127818871 | 0.127818871 | -4.471348474 |
| 1437687_x_at   | -0.136455868 | 12.10674582 | -1.669792839 | 0.127847694 | 0.127847694 | -4.471520474 |
| 1421567_at     | -0.153907702 | 4.254978559 | -1.669700659 | 0.127866248 | 0.127866248 | -4.471631175 |
| 1420269_at     | -0.121708324 | 4.494608726 | -1.669298709 | 0.127947184 | 0.127947184 | -4.472113854 |
| 1458944_at     | -0.144811422 | 3.297235676 | -1.669135346 | 0.127980092 | 0.127980092 | -4.472310012 |
| 1434015_at     | 0.152329617  | 4.499899857 | 1.668786244  | 0.12805044  | 0.12805044  | -4.472729165 |
| 1421366_at     | -0.164600997 | 4.027592269 | -1.668751394 | 0.128057465 | 0.128057465 | -4.472771007 |
| 1447497_at     | -0.126763958 | 3.27333395  | -1.668729903 | 0.128061797 | 0.128061797 | -4.472796808 |
| 1437647_at     | -0.119198488 | 7.23364154  | -1.668675838 | 0.128072696 | 0.128072696 | -4.472861718 |
| 1452479_at     | 0.128899954  | 3.637841625 | 1.668664328  | 0.128075016 | 0.128075016 | -4.472875537 |
| 1451612_at     | -0.125214536 | 5.456849377 | -1.668543851 | 0.128099306 | 0.128099306 | -4.473020174 |
| 1436788_at     | 0.124696386  | 8.500972254 | 1.668195419  | 0.128169579 | 0.128169579 | -4.473438453 |
| AFFX-CreX-5_at | 0.122609101  | 12.79978063 | 1.668146732  | 0.128179401 | 0.128179401 | -4.473496896 |
| 1459468_at     | -0.188291311 | 4.207765255 | -1.668129487 | 0.12818288  | 0.12818288  | -4.473517597 |
| 1424674_at     | 0.114964192  | 10.34901185 | 1.66797677   | 0.128213695 | 0.128213695 | -4.473700912 |
| 1433416_at     | -0.129451837 | 4.387309053 | -1.667805861 | 0.128248187 | 0.128248187 | -4.473906053 |
| 1451165_at     | -0.167656467 | 6.32938541  | -1.667537463 | 0.128302372 | 0.128302372 | -4.474228191 |
| 1419320_at     | 0.130192494  | 5.577220494 | 1.667523731  | 0.128305145 | 0.128305145 | -4.474244673 |
| 1453532_at     | -0.127147666 | 4.423481173 | -1.66751773  | 0.128306357 | 0.128306357 | -4.474251874 |
| 1442871_at     | 0.196335912  | 5.092190004 | 1.667453097  | 0.128319409 | 0.128319409 | -4.474329444 |
| 1417414_at     | 0.105235069  | 8.397822991 | 1.667268648  | 0.128356662 | 0.128356662 | -4.474550805 |
| 1436402_at     | 0.124332836  | 5.318900106 | 1.667066202  | 0.128397562 | 0.128397562 | -4.474793752 |
| 1457664_x_at   | -0.12677223  | 4.3013422   | -1.666967624 | 0.128417482 | 0.128417482 | -4.474912046 |
| 1448328_at     | 0.123308185  | 7.201346437 | 1.666714172  | 0.12846871  | 0.12846871  | -4.475216173 |
| 1459908_at     | 0.162970406  | 4.101166254 | 1.666512414  | 0.128509503 | 0.128509503 | -4.475458256 |
| 1454436_at     | -0.117989232 | 5.95641438  | -1.66642005  | 0.128528182 | 0.128528182 | -4.475569075 |
| 1430412_at     | 0.116477297  | 6.537760725 | 1.666403013  | 0.128531628 | 0.128531628 | -4.475589516 |
| 1441674_at     | -0.120293269 | 5.451348358 | -1.666323172 | 0.128547776 | 0.128547776 | -4.475685308 |
| 1425608_at     | -0.150901029 | 5.641118927 | -1.666316431 | 0.12854914  | 0.12854914  | -4.475693395 |
| 1444900_at     | 0.138472573  | 4.226631315 | 1.666044595  | 0.128604135 | 0.128604135 | -4.476019522 |
| 1424926_at     | 0.164332184  | 8.179685322 | 1.666029981  | 0.128607093 | 0.128607093 | -4.476037054 |
| 1455714_at     | 0.136913928  | 5.988621411 | 1.665508543  | 0.128712648 | 0.128712648 | -4.47666256  |
| 1454291_at     | -0.115108106 | 3.996476533 | -1.66527269  | 0.128760417 | 0.128760417 | -4.476945454 |
| 1445143_at     | 0.109871926  | 6.130786798 | 1.665254747  | 0.128764052 | 0.128764052 | -4.476966974 |
| 1454747_a_at   | 0.107960612  | 10.53880939 | 1.665228015  | 0.128769467 | 0.128769467 | -4.476999037 |
| 1434711_at     | -0.162881137 | 6.546990708 | -1.665142481 | 0.128786796 | 0.128786796 | -4.477101624 |
| 1454122_at     | -0.133721483 | 3.242091042 | -1.664985827 | 0.12881854  | 0.12881854  | -4.477289505 |
| 1458307_at     | 0.186403477  | 3.61785868  | 1.664909403  | 0.128834029 | 0.128834029 | -4.47738116  |
| 1440589_at     | 0.120295193  | 5.54344624  | 1.66450194   | 0.128916636 | 0.128916636 | -4.477869796 |
| 1440171_x_at   | 0.176666383  | 4.708284604 | 1.664480327  | 0.12892102  | 0.12892102  | -4.477895714 |
| 1428323_at     | 0.112794469  | 8.086681854 | 1.664316907  | 0.128954165 | 0.128954165 | -4.478091672 |
| 1443688_at     | 0.103866851  | 3.736202101 | 1.664271189  | 0.128963439 | 0.128963439 | -4.478146492 |
| 1456503_at     | 0.17729902   | 7.030910132 | 1.66392448   | 0.129033791 | 0.129033791 | -4.478562198 |
| 1419914_s_at   | -0.123571027 | 9.924093334 | -1.663741036 | 0.129071028 | 0.129071028 | -4.478782133 |
| 1453684_s_at   | 0.202940624  | 10.40175145 | 1.663653573  | 0.129088786 | 0.129088786 | -4.47888699  |

|              |              |             |              |             |             |              |
|--------------|--------------|-------------|--------------|-------------|-------------|--------------|
| 1421655_a_at | -0.141210091 | 4.644694638 | -1.663518508 | 0.129116212 | 0.129116212 | -4.47904891  |
| 1456127_at   | -0.146022754 | 3.817578667 | -1.663383068 | 0.12914372  | 0.12914372  | -4.479211274 |
| 1425988_a_at | -0.154417036 | 5.510888455 | -1.663291331 | 0.129162354 | 0.129162354 | -4.479321244 |
| 1426852_x_at | 0.381175224  | 6.889307688 | 1.662867363  | 0.129248508 | 0.129248508 | -4.479829438 |
| 1442632_at   | 0.243621369  | 6.0852917   | 1.662299056  | 0.129364073 | 0.129364073 | -4.480510547 |
| 1440221_at   | 0.138972912  | 6.896586525 | 1.66218266   | 0.129387753 | 0.129387753 | -4.480650033 |
| 1423862_at   | 0.117102593  | 7.231775396 | 1.662175834  | 0.129389142 | 0.129389142 | -4.480658214 |
| 1426953_at   | 0.110830874  | 8.884669787 | 1.662137151  | 0.129397013 | 0.129397013 | -4.480704569 |
| 1441598_at   | 0.108287311  | 3.553701849 | 1.661999248  | 0.129425076 | 0.129425076 | -4.480869821 |
| 1432451_at   | 0.122457494  | 3.829090796 | 1.661872354  | 0.129450904 | 0.129450904 | -4.481021873 |
| 1439511_at   | 0.118189749  | 8.909657219 | 1.661863587  | 0.129452688 | 0.129452688 | -4.481032378 |
| 1430582_at   | 0.182570312  | 5.382774399 | 1.661747049  | 0.129476413 | 0.129476413 | -4.481172017 |
| 1440756_at   | 0.145838795  | 5.189968221 | 1.661738013  | 0.129478252 | 0.129478252 | -4.481182844 |
| 1440720_s_at | -0.113765698 | 7.346565204 | -1.661661766 | 0.129493777 | 0.129493777 | -4.481274202 |
| 1440094_at   | -0.131855145 | 3.894904359 | -1.661128414 | 0.129602417 | 0.129602417 | -4.481913203 |
| 1441026_at   | 0.155677572  | 4.427162438 | 1.660858251  | 0.129657479 | 0.129657479 | -4.482236844 |
| 1440147_at   | 0.22789748   | 9.47237192  | 1.660740422  | 0.1296815   | 0.1296815   | -4.482377989 |
| 1456584_x_at | -0.124706444 | 9.209300409 | -1.660705182 | 0.129688685 | 0.129688685 | -4.482420201 |
| 1458751_at   | -0.138920186 | 3.96924405  | -1.660641912 | 0.129701586 | 0.129701586 | -4.482495989 |
| 1433676_at   | -0.117351656 | 11.05700612 | -1.660635832 | 0.129702826 | 0.129702826 | -4.482503271 |
| 1457104_at   | -0.168836541 | 5.246178852 | -1.66055622  | 0.129719061 | 0.129719061 | -4.482598631 |
| 1458920_at   | 0.250879866  | 6.404819688 | 1.660526088  | 0.129725206 | 0.129725206 | -4.482634723 |
| 1418534_at   | 0.125923532  | 9.905898974 | 1.660511138  | 0.129728255 | 0.129728255 | -4.48265263  |
| 1444609_at   | 0.170169568  | 6.213355687 | 1.660358505  | 0.129759388 | 0.129759388 | -4.482835448 |
| 1419151_at   | 0.124526118  | 3.710445311 | 1.660260451  | 0.129779392 | 0.129779392 | -4.482952887 |
| 1439229_at   | -0.142765262 | 6.070708412 | -1.660242887 | 0.129782975 | 0.129782975 | -4.482973924 |
| 1430309_at   | 0.198740698  | 9.692032158 | 1.660087647  | 0.129814652 | 0.129814652 | -4.483159848 |
| 1439514_at   | 0.169985343  | 6.960374077 | 1.660080103  | 0.129816191 | 0.129816191 | -4.483168884 |
| 1426973_at   | -0.150620574 | 7.902468529 | -1.659912023 | 0.129850496 | 0.129850496 | -4.483370177 |
| 1449534_at   | 0.165354874  | 3.58787247  | 1.659832228  | 0.129866785 | 0.129866785 | -4.483465736 |
| 1456621_at   | 0.188572463  | 4.648641512 | 1.659619789  | 0.12991016  | 0.12991016  | -4.483720135 |
| 1416191_at   | -0.147098439 | 9.314949282 | -1.659596086 | 0.129915001 | 0.129915001 | -4.483748518 |
| 1453031_at   | -0.151221569 | 4.37083967  | -1.659222538 | 0.129991305 | 0.129991305 | -4.484195806 |
| 1425536_at   | 0.141399325  | 7.804804989 | 1.659145905  | 0.130006964 | 0.130006964 | -4.484287561 |
| 1448703_at   | 0.109225931  | 10.61082414 | 1.658945946  | 0.13004783  | 0.13004783  | -4.484526968 |
| 1435921_at   | -0.160325571 | 7.266313987 | -1.658834043 | 0.130070705 | 0.130070705 | -4.48466094  |
| 1425784_a_at | 0.200822239  | 8.852227731 | 1.658601683  | 0.130118216 | 0.130118216 | -4.484939113 |
| 1456863_at   | 0.325750851  | 4.468665501 | 1.658540576  | 0.130130713 | 0.130130713 | -4.485012266 |
| 1419173_at   | -0.116836902 | 7.724738215 | -1.658480304 | 0.130143041 | 0.130143041 | -4.485084417 |
| 1442711_at   | -0.157987425 | 5.18866796  | -1.658381945 | 0.13016316  | 0.13016316  | -4.48520216  |
| 1427342_at   | 0.145798301  | 7.882482863 | 1.65836681   | 0.130166257 | 0.130166257 | -4.485220277 |
| 1430006_x_at | 0.112803459  | 3.921249188 | 1.658222671  | 0.130195746 | 0.130195746 | -4.485392814 |
| 1446578_at   | 0.099121642  | 4.174174029 | 1.658217218  | 0.130196862 | 0.130196862 | -4.485399341 |
| 1454945_at   | -0.142417843 | 8.032619809 | -1.658210857 | 0.130198164 | 0.130198164 | -4.485406955 |
| 1428359_s_at | 0.128408702  | 3.430097017 | 1.658099841  | 0.130220881 | 0.130220881 | -4.485539838 |
| 1431426_at   | -0.129595135 | 3.742625114 | -1.657882969 | 0.130265271 | 0.130265271 | -4.485799416 |
| 1423085_at   | -0.156053596 | 8.519934106 | -1.657844451 | 0.130273156 | 0.130273156 | -4.485845517 |
| 1426060_at   | 0.216459696  | 9.368545598 | 1.657714209  | 0.130299822 | 0.130299822 | -4.486001396 |
| 1421580_at   | -0.101602003 | 3.763788075 | -1.657640138 | 0.13031499  | 0.13031499  | -4.486090044 |
| 1451214_at   | 0.112636942  | 9.783021245 | 1.657549906  | 0.130333469 | 0.130333469 | -4.486198032 |
| 1443739_at   | -0.267794721 | 5.841007297 | -1.657304922 | 0.130383652 | 0.130383652 | -4.48649121  |
| 1423860_at   | -0.22445475  | 3.994113524 | -1.657108143 | 0.130423974 | 0.130423974 | -4.486726684 |
| 1441997_at   | 0.157122844  | 6.598716503 | 1.656978091  | 0.130450629 | 0.130450629 | -4.486882303 |

|              |              |             |              |             |             |              |
|--------------|--------------|-------------|--------------|-------------|-------------|--------------|
| 1425128_at   | 0.107607727  | 4.973172848 | 1.656915427  | 0.130463474 | 0.130463474 | -4.486957285 |
| 1419817_s_at | -0.12196889  | 7.860136613 | -1.656879247 | 0.130470891 | 0.130470891 | -4.487000576 |
| 1443999_at   | -0.165225715 | 4.816525738 | -1.656652735 | 0.130517334 | 0.130517334 | -4.487271596 |
| 1430052_at   | -0.173386839 | 5.212055825 | -1.656515912 | 0.130545395 | 0.130545395 | -4.487435294 |
| 1420985_at   | 0.124947696  | 9.862683564 | 1.656345524  | 0.130580348 | 0.130580348 | -4.487639143 |
| 1438524_x_at | 0.127233207  | 3.077023917 | 1.656196801  | 0.130610863 | 0.130610863 | -4.487817064 |
| 1444267_at   | -0.135751276 | 3.677658128 | -1.655987863 | 0.130653744 | 0.130653744 | -4.488067009 |
| 1442197_at   | 0.295967311  | 7.421402668 | 1.655857649  | 0.130680474 | 0.130680474 | -4.488222771 |
| 1454897_at   | -0.165311895 | 3.742141674 | -1.655698019 | 0.13071325  | 0.13071325  | -4.488413712 |
| 1442099_at   | 0.133417765  | 5.145845461 | 1.655693549  | 0.130714168 | 0.130714168 | -4.48841906  |
| 1453119_at   | -0.14557174  | 5.325331332 | -1.655504005 | 0.130753096 | 0.130753096 | -4.488645771 |
| 1434738_at   | 0.116316491  | 7.135754189 | 1.655468664  | 0.130760356 | 0.130760356 | -4.488688041 |
| 1432679_at   | 0.127339887  | 3.975920373 | 1.655240282  | 0.130807276 | 0.130807276 | -4.488961188 |
| 1447759_x_at | -0.110832545 | 7.313619377 | -1.655229177 | 0.130809558 | 0.130809558 | -4.488974468 |
| 1439287_at   | -0.130654975 | 6.195064297 | -1.654970873 | 0.130862645 | 0.130862645 | -4.489283378 |
| 1448071_at   | -0.141869628 | 3.66607844  | -1.654935506 | 0.130869915 | 0.130869915 | -4.489325673 |
| 1434420_x_at | 0.137869756  | 8.626846907 | 1.65469886   | 0.130918571 | 0.130918571 | -4.489608659 |
| 1451568_at   | 0.136903228  | 4.870374395 | 1.654538315  | 0.130951589 | 0.130951589 | -4.489800631 |
| 1423947_at   | 0.152063835  | 7.400881388 | 1.654462552  | 0.130967173 | 0.130967173 | -4.489891222 |
| 1440240_at   | -0.11747036  | 5.487496822 | -1.654459389 | 0.130967824 | 0.130967824 | -4.489895004 |
| 1431866_at   | 0.117274174  | 3.842263516 | 1.654299566  | 0.131000704 | 0.131000704 | -4.490086099 |
| 1438302_at   | -0.148299837 | 5.533141107 | -1.654292268 | 0.131002206 | 0.131002206 | -4.490094825 |
| 1430653_at   | 0.112075075  | 4.90230586  | 1.654187373  | 0.131023791 | 0.131023791 | -4.49022024  |
| 1433673_at   | 0.137117119  | 4.453433815 | 1.654131699  | 0.131035248 | 0.131035248 | -4.490286804 |
| 1460437_at   | -0.163872928 | 4.73276384  | -1.65406639  | 0.13104869  | 0.13104869  | -4.490364885 |
| 1442728_at   | 0.123956023  | 3.568406636 | 1.653773083  | 0.131109072 | 0.131109072 | -4.490715537 |
| 1444080_at   | 0.190858402  | 5.072074195 | 1.653711046  | 0.131121846 | 0.131121846 | -4.490789699 |
| 1422024_at   | 0.149902109  | 6.962163809 | 1.653554764  | 0.131154032 | 0.131154032 | -4.49097652  |
| 1421649_at   | -0.17260163  | 4.423151858 | -1.653504082 | 0.131164472 | 0.131164472 | -4.491037104 |
| 1428318_at   | -0.129425387 | 3.27677299  | -1.653280678 | 0.131210498 | 0.131210498 | -4.491304145 |
| 1443389_at   | -0.143038761 | 5.379784533 | -1.65317403  | 0.131232474 | 0.131232474 | -4.491431618 |
| 1425763_x_at | -0.136612072 | 5.564837563 | -1.653088846 | 0.131250031 | 0.131250031 | -4.491533434 |
| 1449047_at   | 0.123317557  | 7.058096763 | 1.652997315  | 0.131268897 | 0.131268897 | -4.491642832 |
| 1455941_s_at | 0.158334409  | 7.195201365 | 1.652848135  | 0.131299652 | 0.131299652 | -4.491821127 |
| 1442623_at   | 0.147453092  | 7.75086716  | 1.652821008  | 0.131305245 | 0.131305245 | -4.491853547 |
| 1429930_at   | -0.343636571 | 5.732948688 | -1.652819194 | 0.131305619 | 0.131305619 | -4.491855715 |
| 1451565_s_at | -0.194273397 | 4.558525277 | -1.652511851 | 0.131369003 | 0.131369003 | -4.492223013 |
| 1430655_at   | 0.231793415  | 7.007760412 | 1.652439361  | 0.131383957 | 0.131383957 | -4.49230964  |
| 1416935_at   | 0.199953139  | 5.487337103 | 1.652306621  | 0.131411343 | 0.131411343 | -4.49246826  |
| 1429696_at   | 0.130260713  | 4.357586377 | 1.652178277  | 0.131437828 | 0.131437828 | -4.492621623 |
| 1423469_at   | -0.15790142  | 3.801460168 | -1.652162051 | 0.131441177 | 0.131441177 | -4.492641012 |
| 1456505_at   | 0.172934209  | 7.907084521 | 1.651881821  | 0.131499022 | 0.131499022 | -4.492975845 |
| 1419202_at   | -0.130468771 | 4.118183183 | -1.651654077 | 0.13154605  | 0.13154605  | -4.493247945 |
| 1446058_at   | -0.111952376 | 4.289928686 | -1.651624593 | 0.131552139 | 0.131552139 | -4.49328317  |
| 1442180_at   | 0.16939843   | 3.912311639 | 1.651506121  | 0.13157661  | 0.13157661  | -4.493424708 |
| 1446126_at   | 0.160754965  | 3.905003008 | 1.651411644  | 0.131596128 | 0.131596128 | -4.493537576 |
| 1458059_at   | 0.155172229  | 4.348238112 | 1.651382224  | 0.131602206 | 0.131602206 | -4.493572722 |
| 1460536_at   | -0.134535069 | 6.546508345 | -1.651354352 | 0.131607964 | 0.131607964 | -4.493606019 |
| 1433737_at   | 0.144312173  | 7.810591305 | 1.651282888  | 0.131622731 | 0.131622731 | -4.49369139  |
| 1443982_at   | 0.135266868  | 4.187475671 | 1.651245214  | 0.131630516 | 0.131630516 | -4.493736395 |
| 1444298_at   | -0.161657118 | 3.530070523 | -1.65116376  | 0.131647349 | 0.131647349 | -4.493833697 |
| 1451415_at   | 0.148357727  | 8.795594751 | 1.651157209  | 0.131648703 | 0.131648703 | -4.493841523 |
| 1443403_at   | 0.126452473  | 3.566207449 | 1.650997949  | 0.131681622 | 0.131681622 | -4.494031763 |

|              |              |             |              |             |             |              |
|--------------|--------------|-------------|--------------|-------------|-------------|--------------|
| 1427526_at   | 0.15327584   | 8.019992386 | 1.650924967  | 0.131696709 | 0.131696709 | -4.494118939 |
| 1456992_at   | 0.15696914   | 7.29605448  | 1.650874265  | 0.131707192 | 0.131707192 | -4.494179501 |
| 1445178_at   | 0.172526071  | 7.110422088 | 1.650869282  | 0.131708222 | 0.131708222 | -4.494185452 |
| 1446209_at   | 0.186712035  | 6.53265744  | 1.650841742  | 0.131713916 | 0.131713916 | -4.494218348 |
| 1460570_at   | -0.163735975 | 6.237152586 | -1.650778411 | 0.131727012 | 0.131727012 | -4.494293992 |
| 1443030_at   | -0.148832468 | 6.118306462 | -1.650774742 | 0.13172777  | 0.13172777  | -4.494298375 |
| 1453052_at   | 0.116772882  | 7.135596322 | 1.650656089  | 0.131752308 | 0.131752308 | -4.494440094 |
| 1457427_at   | -0.117696299 | 4.25045454  | -1.650541954 | 0.131775915 | 0.131775915 | -4.494576411 |
| 1449254_at   | -0.697399051 | 10.34666898 | -1.650278099 | 0.131830505 | 0.131830505 | -4.494891532 |
| 1428949_at   | -0.110107294 | 9.936261021 | -1.650092016 | 0.131869016 | 0.131869016 | -4.495113755 |
| 1430450_at   | 0.175750438  | 3.485267349 | 1.650048718  | 0.131877979 | 0.131877979 | -4.49516546  |
| 1446406_at   | 0.143127495  | 3.908403168 | 1.649823709  | 0.131924562 | 0.131924562 | -4.49543415  |
| 1418041_at   | 0.105109687  | 6.374940892 | 1.649657067  | 0.131959072 | 0.131959072 | -4.49563313  |
| 1456665_at   | -0.148972945 | 8.524250339 | -1.649637097 | 0.131963208 | 0.131963208 | -4.495656975 |
| 1423016_a_at | 0.218344177  | 5.166382961 | 1.649545977  | 0.131982082 | 0.131982082 | -4.495765774 |
| 1457474_at   | 0.107278224  | 3.938765667 | 1.649506953  | 0.131990166 | 0.131990166 | -4.495812367 |
| 1425656_a_at | 0.137020762  | 7.476609206 | 1.649447927  | 0.132002394 | 0.132002394 | -4.495882843 |
| 1418046_at   | 0.204910395  | 5.702558654 | 1.649253902  | 0.132042597 | 0.132042597 | -4.496114494 |
| 1436512_at   | 0.14302289   | 8.06362726  | 1.649103899  | 0.132073685 | 0.132073685 | -4.496293577 |
| 1433992_at   | 0.100001093  | 8.066344759 | 1.649056682  | 0.132083473 | 0.132083473 | -4.496349946 |
| 1428705_at   | -0.440898652 | 6.418557025 | -1.648936912 | 0.132108302 | 0.132108302 | -4.496492928 |
| 1457460_at   | 0.125663263  | 3.897762445 | 1.648710413  | 0.132155268 | 0.132155268 | -4.496763308 |
| 1446062_at   | 0.152160065  | 4.300388005 | 1.648413075  | 0.132216946 | 0.132216946 | -4.497118225 |
| 1440345_at   | 0.203321127  | 6.594886046 | 1.648369189  | 0.132226051 | 0.132226051 | -4.497170607 |
| 1422907_at   | -0.130944348 | 4.598227351 | -1.648334649 | 0.132233219 | 0.132233219 | -4.497211834 |
| 1418627_at   | 0.149114397  | 8.972239708 | 1.648078503  | 0.132286379 | 0.132286379 | -4.49751755  |
| 1455235_x_at | -0.135537761 | 9.835291107 | -1.648026524 | 0.132297169 | 0.132297169 | -4.497579587 |
| 1438197_at   | -0.118591476 | 7.131396986 | -1.64800945  | 0.132300713 | 0.132300713 | -4.497599964 |
| 1442241_at   | 0.14459803   | 6.524837715 | 1.647918469  | 0.132319602 | 0.132319602 | -4.497708543 |
| 1447180_at   | -0.124736216 | 4.557553539 | -1.64790874  | 0.132321622 | 0.132321622 | -4.497720155 |
| 1433154_at   | -0.111430615 | 4.026507922 | -1.647907402 | 0.132321899 | 0.132321899 | -4.497721751 |
| 1443306_at   | -0.108338047 | 5.405018573 | -1.647746482 | 0.132355315 | 0.132355315 | -4.497913793 |
| 1449005_at   | -0.150288469 | 6.530814191 | -1.647584947 | 0.132388865 | 0.132388865 | -4.498106558 |
| 1453797_at   | -0.133622383 | 3.993181614 | -1.647525206 | 0.132401275 | 0.132401275 | -4.498177847 |
| 1419521_at   | 0.12925415   | 5.601243938 | 1.647512389  | 0.132403937 | 0.132403937 | -4.49819314  |
| 1454301_at   | 0.158146868  | 8.647781689 | 1.647488412  | 0.132408919 | 0.132408919 | -4.498221752 |
| 1441991_at   | 0.177062906  | 4.566907679 | 1.647410818  | 0.132425039 | 0.132425039 | -4.498314342 |
| 1455811_at   | -0.137732021 | 4.544691073 | -1.647352416 | 0.132437174 | 0.132437174 | -4.49838403  |
| 1427758_x_at | 0.154323423  | 4.089189865 | 1.647312036  | 0.132445565 | 0.132445565 | -4.498432212 |
| 1451031_at   | 0.139534306  | 7.488316548 | 1.647275277  | 0.132453204 | 0.132453204 | -4.498476073 |
| 1453219_a_at | -0.113697944 | 4.058304517 | -1.647167176 | 0.13247567  | 0.13247567  | -4.498605058 |
| 1426340_at   | -0.389173399 | 8.376310597 | -1.647014896 | 0.132507324 | 0.132507324 | -4.498786748 |
| 1417986_at   | 0.152454015  | 7.349959486 | 1.646877142  | 0.132535964 | 0.132535964 | -4.4989511   |
| 1433274_at   | -0.179988729 | 4.510691647 | -1.64679629  | 0.132552777 | 0.132552777 | -4.499047561 |
| 1457765_at   | 0.260848239  | 6.926975855 | 1.646712622  | 0.132570177 | 0.132570177 | -4.499147378 |
| 1451594_s_at | -0.1360387   | 3.493593064 | -1.646605742 | 0.132592407 | 0.132592407 | -4.499274884 |
| 1439634_at   | -0.114650026 | 3.704822714 | -1.646543689 | 0.132605315 | 0.132605315 | -4.499348911 |
| 1442968_at   | -0.155965522 | 4.071511208 | -1.646505832 | 0.132613191 | 0.132613191 | -4.499394071 |
| 1423905_at   | -0.213099044 | 5.710935424 | -1.646491024 | 0.132616272 | 0.132616272 | -4.499411737 |
| 1458111_at   | 0.24440038   | 5.948993495 | 1.646071442  | 0.132703588 | 0.132703588 | -4.499912236 |
| 1437884_at   | 0.286516082  | 8.702536949 | 1.645990157  | 0.13272051  | 0.13272051  | -4.50000919  |
| 1421721_a_at | -0.173343751 | 6.741218015 | -1.645983621 | 0.132721871 | 0.132721871 | -4.500016986 |
| 1449822_at   | 0.190572636  | 4.332347802 | 1.645626966  | 0.132796142 | 0.132796142 | -4.500442364 |



|              |              |             |              |             |             |              |
|--------------|--------------|-------------|--------------|-------------|-------------|--------------|
| 1455455_at   | 0.150924702  | 5.043965839 | 1.645524406  | 0.132817507 | 0.132817507 | -4.500564677 |
| 1418213_at   | -0.120000215 | 4.948684967 | -1.645431356 | 0.132836893 | 0.132836893 | -4.500675646 |
| 1423561_at   | -0.322019121 | 6.046666961 | -1.645305498 | 0.132863118 | 0.132863118 | -4.500825736 |
| 1438439_at   | 0.105187639  | 4.10687615  | 1.645003647  | 0.132926035 | 0.132926035 | -4.501185681 |
| 1444777_at   | -0.110286384 | 8.268365805 | -1.644995889 | 0.132927652 | 0.132927652 | -4.501194931 |
| 1455892_x_at | -0.278832834 | 10.02044054 | -1.644994144 | 0.132928016 | 0.132928016 | -4.501197013 |
| 1440757_at   | -0.126099786 | 3.485378943 | -1.644941763 | 0.132938937 | 0.132938937 | -4.501259471 |
| 1435948_at   | 0.180823597  | 8.223979615 | 1.644931138  | 0.132941153 | 0.132941153 | -4.501272141 |
| 1428209_at   | 0.159162448  | 8.462273615 | 1.644911884  | 0.132945167 | 0.132945167 | -4.501295099 |
| 1460074_x_at | 0.153252002  | 6.559032156 | 1.64483232   | 0.132961758 | 0.132961758 | -4.501389968 |
| 1460318_at   | -0.452505793 | 6.285790466 | -1.644770593 | 0.13297463  | 0.13297463  | -4.501463567 |
| 1443361_at   | -0.129023345 | 6.313363481 | -1.644655404 | 0.132998655 | 0.132998655 | -4.501600907 |
| 1453146_at   | 0.128255921  | 9.149100602 | 1.644631698  | 0.1330036   | 0.1330036   | -4.501629172 |
| 1445792_at   | -0.157458581 | 4.29791779  | -1.644586995 | 0.133012924 | 0.133012924 | -4.50168247  |
| 1450010_at   | 0.137243105  | 9.706602943 | 1.644579856  | 0.133014414 | 0.133014414 | -4.501690981 |
| 1419751_x_at | 0.142542556  | 3.090536867 | 1.644433099  | 0.133045031 | 0.133045031 | -4.501865949 |
| 1460451_at   | -0.162071882 | 5.342677697 | -1.644410082 | 0.133049834 | 0.133049834 | -4.50189339  |
| 1431029_at   | -0.144555892 | 4.068585851 | -1.644291021 | 0.133074678 | 0.133074678 | -4.502035331 |
| 1448323_a_at | -0.154060933 | 11.40303012 | -1.644254143 | 0.133082375 | 0.133082375 | -4.502079296 |
| 1448066_at   | -0.114704789 | 4.502172339 | -1.64419825  | 0.13309404  | 0.13309404  | -4.502145927 |
| 1443494_at   | 0.11835748   | 6.388719887 | 1.644193994  | 0.133094929 | 0.133094929 | -4.502151002 |
| 1458028_at   | -0.135713092 | 5.716736752 | -1.644075382 | 0.133119687 | 0.133119687 | -4.502292398 |
| 1452497_a_at | 0.109825044  | 7.516261498 | 1.643898072  | 0.133156706 | 0.133156706 | -4.502503761 |
| 1417068_a_at | 0.107046883  | 8.810532668 | 1.643865986  | 0.133163406 | 0.133163406 | -4.502542008 |
| 1446817_at   | -0.126942949 | 3.668043031 | -1.643803298 | 0.133176497 | 0.133176497 | -4.502616732 |
| 1449749_s_at | 0.220875571  | 7.89042313  | 1.643682555  | 0.133201714 | 0.133201714 | -4.502760653 |
| 1421050_at   | -0.186407735 | 3.788995017 | -1.643656685 | 0.133207118 | 0.133207118 | -4.502791489 |
| 1419726_at   | 0.143061     | 3.632051698 | 1.643589111  | 0.133221233 | 0.133221233 | -4.502872031 |
| 1458090_at   | -0.137970054 | 3.981820397 | -1.643400177 | 0.133260706 | 0.133260706 | -4.503097218 |
| 1455967_at   | -0.130229758 | 6.14656691  | -1.643342821 | 0.133272692 | 0.133272692 | -4.503165577 |
| 1453978_at   | 0.126568369  | 3.745645504 | 1.643283705  | 0.133285046 | 0.133285046 | -4.503236032 |
| 1452931_at   | -0.157489225 | 6.302919356 | -1.643254548 | 0.133291139 | 0.133291139 | -4.503270781 |
| 1430461_at   | -0.146007606 | 4.172761152 | -1.642991722 | 0.133346079 | 0.133346079 | -4.503584004 |
| 1427502_at   | -0.10968582  | 6.844674538 | -1.642987132 | 0.133347039 | 0.133347039 | -4.503589473 |
| 1437825_at   | 0.109310311  | 3.674601739 | 1.642934158  | 0.133358115 | 0.133358115 | -4.503652602 |
| 1422725_at   | -0.224091282 | 5.890677945 | -1.642696038 | 0.133407912 | 0.133407912 | -4.503936355 |
| 1457200_at   | 0.111630445  | 3.813929761 | 1.642549777  | 0.133438507 | 0.133438507 | -4.504110635 |
| 1451221_at   | 0.120254588  | 8.678353965 | 1.642363584  | 0.133477465 | 0.133477465 | -4.504332486 |
| 1441687_at   | 0.16247687   | 7.460357209 | 1.642250321  | 0.133501168 | 0.133501168 | -4.504467434 |
| 1445551_at   | 0.149322082  | 5.463802054 | 1.642153372  | 0.13352146  | 0.13352146  | -4.504582941 |
| 1440981_at   | 0.153591885  | 3.672120755 | 1.641820115  | 0.133591234 | 0.133591234 | -4.504979966 |
| 1418760_at   | 0.1851181    | 8.408715895 | 1.641801777  | 0.133595075 | 0.133595075 | -4.505001812 |
| 1445946_at   | -0.14878526  | 5.024978164 | -1.641742113 | 0.13360757  | 0.13360757  | -4.505072888 |
| 1445312_at   | 0.137858785  | 5.751745726 | 1.641712085  | 0.13361386  | 0.13361386  | -4.50510866  |
| 1423001_at   | -0.144055481 | 6.143274761 | -1.641584534 | 0.133640578 | 0.133640578 | -4.505260601 |
| 1444848_at   | 0.142481937  | 6.670865879 | 1.641437955  | 0.133671288 | 0.133671288 | -4.505435203 |
| 1416408_at   | 0.166074251  | 8.464229801 | 1.641380257  | 0.133683378 | 0.133683378 | -4.50550393  |
| 1455799_at   | 0.200629302  | 4.956419247 | 1.641347102  | 0.133690326 | 0.133690326 | -4.505543422 |
| 1430500_s_at | 0.100633279  | 9.434768696 | 1.641329884  | 0.133693934 | 0.133693934 | -4.50556393  |
| 1417327_at   | -0.29044195  | 9.724657601 | -1.641187397 | 0.133723797 | 0.133723797 | -4.505733646 |
| 1436747_at   | 0.114515971  | 9.670921632 | 1.641124739  | 0.133736932 | 0.133736932 | -4.505808274 |
| 1429974_at   | -0.288143834 | 6.317021517 | -1.641039887 | 0.13375472  | 0.13375472  | -4.505909336 |
| 1430584_s_at | -0.185201324 | 7.251078698 | -1.640927126 | 0.133778362 | 0.133778362 | -4.506043634 |

|              |              |             |              |             |             |              |
|--------------|--------------|-------------|--------------|-------------|-------------|--------------|
| 1435211_at   | -0.180251679 | 6.337835492 | -1.640790169 | 0.133807083 | 0.133807083 | -4.506206743 |
| 1452326_at   | -0.139505945 | 4.253456548 | -1.640373199 | 0.133894557 | 0.133894557 | -4.506703292 |
| 1425561_at   | -0.133716698 | 7.689960645 | -1.640281147 | 0.133913875 | 0.133913875 | -4.506812904 |
| 1442128_at   | 0.206293043  | 6.147836803 | 1.640271245  | 0.133915954 | 0.133915954 | -4.506824695 |
| 1429172_a_at | 0.355296168  | 7.655589801 | 1.640169536  | 0.133937302 | 0.133937302 | -4.506945802 |
| 1451273_x_at | 0.128330843  | 6.100670597 | 1.640096465  | 0.133952641 | 0.133952641 | -4.507032807 |
| 1432552_at   | -0.105688791 | 6.541001818 | -1.640068936 | 0.13395842  | 0.13395842  | -4.507065586 |
| 1458374_at   | 0.155424743  | 8.953423829 | 1.639927475  | 0.133988121 | 0.133988121 | -4.507234015 |
| 1455106_a_at | -0.263205498 | 8.148303294 | -1.639901737 | 0.133993526 | 0.133993526 | -4.50726466  |
| 1456286_at   | -0.142273845 | 6.960526464 | -1.639754421 | 0.134024463 | 0.134024463 | -4.507440052 |
| 1455643_s_at | 0.12668236   | 9.730965514 | 1.639735963  | 0.13402834  | 0.13402834  | -4.507462027 |
| 1450274_at   | -0.168250291 | 3.60962978  | -1.63967012  | 0.13404217  | 0.13404217  | -4.507540417 |
| 1430559_at   | -0.124632553 | 5.180191321 | -1.639638432 | 0.134048827 | 0.134048827 | -4.507578142 |
| 1438717_a_at | -0.16353991  | 4.295692466 | -1.639611665 | 0.13405445  | 0.13405445  | -4.507610009 |
| 1439723_at   | -0.169720764 | 5.235970412 | -1.639490533 | 0.134079899 | 0.134079899 | -4.507754215 |
| 1418595_at   | 0.110495104  | 4.175126333 | 1.639379512  | 0.134103227 | 0.134103227 | -4.507886379 |
| 1444254_at   | 0.105992415  | 3.923167383 | 1.639285542  | 0.134122975 | 0.134122975 | -4.507998242 |
| 1428702_at   | -0.115759357 | 6.939731501 | -1.639241733 | 0.134132183 | 0.134132183 | -4.508050392 |
| 1443957_at   | -0.230751982 | 6.429136449 | -1.639156617 | 0.134150074 | 0.134150074 | -4.508151712 |
| 1419885_at   | -0.126396641 | 4.796498944 | -1.639085114 | 0.134165106 | 0.134165106 | -4.508236824 |
| 1455604_at   | -0.178231192 | 6.829199544 | -1.639004251 | 0.134182106 | 0.134182106 | -4.508333076 |
| 1416190_a_at | -0.138863489 | 8.467929048 | -1.638944665 | 0.134194635 | 0.134194635 | -4.508404    |
| 1425541_at   | 0.144362196  | 4.370292804 | 1.638816893  | 0.134221504 | 0.134221504 | -4.508556082 |
| 1445816_at   | -0.176818943 | 3.741331808 | -1.638803368 | 0.134224349 | 0.134224349 | -4.508572179 |
| 1450340_a_at | -0.116759056 | 5.052139691 | -1.638778535 | 0.134229571 | 0.134229571 | -4.508601735 |
| 1459999_at   | -0.192579318 | 5.700785788 | -1.638497807 | 0.134288626 | 0.134288626 | -4.508935849 |
| 1428373_at   | 0.125703867  | 9.553115307 | 1.638406112  | 0.13430792  | 0.13430792  | -4.509044975 |
| 1450778_a_at | 0.138112814  | 9.822077318 | 1.638395914  | 0.134310067 | 0.134310067 | -4.509057112 |
| 1418239_at   | 0.142295061  | 3.864906171 | 1.638383989  | 0.134312576 | 0.134312576 | -4.509071303 |
| 1437260_at   | -0.127982832 | 7.139977845 | -1.638268413 | 0.134336899 | 0.134336899 | -4.509208845 |
| 1418051_at   | -0.187592019 | 6.387408653 | -1.638257371 | 0.134339223 | 0.134339223 | -4.509221986 |
| 1427486_at   | 0.111685572  | 6.928365862 | 1.638226828  | 0.134345652 | 0.134345652 | -4.509258332 |
| 1450685_at   | 0.121371448  | 10.38306397 | 1.638185402  | 0.134354372 | 0.134354372 | -4.50930763  |
| 1426576_at   | 0.103818186  | 8.012682598 | 1.638031236  | 0.134386827 | 0.134386827 | -4.509491085 |
| 1422466_at   | 0.130595042  | 7.959771886 | 1.638009743  | 0.134391352 | 0.134391352 | -4.509516661 |
| 1444244_at   | 0.125591175  | 5.581279551 | 1.637922306  | 0.134409763 | 0.134409763 | -4.509620704 |
| 1439654_at   | 0.152217045  | 4.206697636 | 1.637846929  | 0.134425637 | 0.134425637 | -4.509710396 |
| 1424714_at   | 0.13883222   | 3.670956219 | 1.637612828  | 0.134474946 | 0.134474946 | -4.509988938 |
| 1420681_at   | -0.105568612 | 5.187802327 | -1.637603551 | 0.1344769   | 0.1344769   | -4.509999977 |
| 1460381_at   | 0.131525713  | 4.666740484 | 1.637532039  | 0.134491966 | 0.134491966 | -4.510085061 |
| 1433115_at   | -0.125145865 | 3.649826576 | -1.637508378 | 0.134496951 | 0.134496951 | -4.510113212 |
| 1419617_at   | -0.133529798 | 5.387235238 | -1.637493508 | 0.134500085 | 0.134500085 | -4.510130904 |
| 1456300_at   | 0.145213104  | 5.851414926 | 1.63744775   | 0.134509726 | 0.134509726 | -4.510185345 |
| 1453707_at   | 0.104625912  | 3.212029061 | 1.637378033  | 0.134524417 | 0.134524417 | -4.510268289 |
| 1450618_a_at | -0.111927107 | 6.771941345 | -1.637278708 | 0.13454535  | 0.13454535  | -4.510386456 |
| 1452912_at   | 0.193187362  | 7.463342222 | 1.637261419  | 0.134548994 | 0.134548994 | -4.510407025 |
| 1434087_at   | 0.121238974  | 7.917817051 | 1.636764423  | 0.134653783 | 0.134653783 | -4.510998247 |
| 1449480_at   | 0.13143372   | 6.860993892 | 1.636649551  | 0.134678014 | 0.134678014 | -4.511134886 |
| 1452445_at   | -0.27050804  | 6.375275389 | -1.636582746 | 0.134692107 | 0.134692107 | -4.511214346 |
| 1434330_at   | -0.119337886 | 7.542186017 | -1.636358702 | 0.134739382 | 0.134739382 | -4.511480824 |
| 1444058_at   | 0.297545354  | 8.301206283 | 1.636357487  | 0.134739639 | 0.134739639 | -4.51148227  |
| 1435285_at   | 0.149385575  | 8.805855862 | 1.636320455  | 0.134747454 | 0.134747454 | -4.511526314 |
| 1451263_a_at | 0.143887223  | 4.712043448 | 1.636120051  | 0.134789755 | 0.134789755 | -4.511764657 |

|              |              |             |              |             |             |              |
|--------------|--------------|-------------|--------------|-------------|-------------|--------------|
| 1455747_at   | -0.132792277 | 4.213324794 | -1.636095102 | 0.134795022 | 0.134795022 | -4.511794328 |
| 1431219_at   | 0.143084411  | 6.625155773 | 1.636029266  | 0.134808922 | 0.134808922 | -4.511872624 |
| 1455507_s_at | 0.130040569  | 9.101769096 | 1.636021662  | 0.134810528 | 0.134810528 | -4.511881667 |
| 1433228_at   | 0.129116287  | 3.706136683 | 1.635995243  | 0.134816106 | 0.134816106 | -4.511913085 |
| 1425051_at   | 0.166421675  | 8.740363885 | 1.635827039  | 0.134851626 | 0.134851626 | -4.512113114 |
| 1432758_at   | -0.146432141 | 5.271210576 | -1.635775712 | 0.134862467 | 0.134862467 | -4.51217415  |
| 1445481_at   | 0.19721234   | 6.658086759 | 1.635603227  | 0.134898902 | 0.134898902 | -4.512379255 |
| 1444233_at   | -0.135879126 | 4.289654345 | -1.635551421 | 0.134909847 | 0.134909847 | -4.512440857 |
| 1458987_at   | -0.14080305  | 6.76928814  | -1.635499798 | 0.134920755 | 0.134920755 | -4.51250224  |
| 1433877_at   | -0.109694818 | 4.034547937 | -1.63549138  | 0.134922533 | 0.134922533 | -4.51251225  |
| 1459978_x_at | 0.105141187  | 7.026137462 | 1.635466492  | 0.134927792 | 0.134927792 | -4.512541842 |
| 1453786_at   | -0.144189692 | 4.013249548 | -1.635443174 | 0.134932719 | 0.134932719 | -4.512569569 |
| 1420437_at   | -0.113899682 | 3.921203046 | -1.635315006 | 0.134959805 | 0.134959805 | -4.512721962 |
| 1431470_a_at | -0.14265401  | 4.069791813 | -1.635311146 | 0.134960621 | 0.134960621 | -4.512726551 |
| 1450793_at   | -0.17681962  | 3.844342328 | -1.635201014 | 0.134983899 | 0.134983899 | -4.512857495 |
| 1452330_a_at | -0.167730998 | 9.66546389  | -1.634824856 | 0.135063434 | 0.135063434 | -4.513304703 |
| 1426754_x_at | -0.205466323 | 9.185120038 | -1.634730683 | 0.135083353 | 0.135083353 | -4.513416655 |
| 1436791_at   | 0.147766278  | 9.052072096 | 1.634426921  | 0.13514762  | 0.13514762  | -4.513777746 |
| 1432836_at   | -0.131420998 | 3.596782298 | -1.634378678 | 0.135157829 | 0.135157829 | -4.51383509  |
| 1455757_at   | 0.122236523  | 8.758629442 | 1.634208543  | 0.135193839 | 0.135193839 | -4.514037318 |
| 1415884_at   | -0.124261742 | 6.376150296 | -1.634140811 | 0.135208177 | 0.135208177 | -4.514117823 |
| 1449522_at   | -0.161520209 | 8.398687308 | -1.634122299 | 0.135212096 | 0.135212096 | -4.514139826 |
| 1418930_at   | 0.148657399  | 5.186646651 | 1.633931765  | 0.135252438 | 0.135252438 | -4.514366282 |
| 1418468_at   | -0.152684477 | 5.30432068  | -1.633900282 | 0.135259105 | 0.135259105 | -4.514403699 |
| 1449239_at   | -0.105355011 | 4.140439551 | -1.6337529   | 0.13529032  | 0.13529032  | -4.514578857 |
| 1434230_at   | 0.10892556   | 9.279188156 | 1.633726392  | 0.135295935 | 0.135295935 | -4.514610359 |
| 1443086_at   | -0.126469442 | 9.387665423 | -1.633656996 | 0.135310635 | 0.135310635 | -4.514692831 |
| 1416421_a_at | 0.163308808  | 9.064158146 | 1.633614853  | 0.135319563 | 0.135319563 | -4.514742913 |
| 1444380_at   | -0.168698984 | 4.608315929 | -1.6335893   | 0.135324977 | 0.135324977 | -4.514773279 |
| 1454564_at   | -0.159580627 | 3.735559379 | -1.633507992 | 0.135342204 | 0.135342204 | -4.514869904 |
| 1425007_at   | 0.14027096   | 7.555447175 | 1.633274637  | 0.135391658 | 0.135391658 | -4.5151472   |
| 1454779_s_at | -0.175298757 | 6.813900175 | -1.63320983  | 0.135405395 | 0.135405395 | -4.515224208 |
| 1433628_at   | -0.102881774 | 6.796462685 | -1.632972673 | 0.135455675 | 0.135455675 | -4.515505997 |
| 1425739_at   | 0.123747967  | 5.897743066 | 1.632917547  | 0.135467365 | 0.135467365 | -4.515571495 |
| 1419890_at   | 0.147221015  | 3.986326958 | 1.632902732  | 0.135470507 | 0.135470507 | -4.515589097 |
| 1427628_at   | -0.189611951 | 4.732487654 | -1.632567468 | 0.135541623 | 0.135541623 | -4.515987415 |
| 1450708_at   | 0.544157519  | 5.596059773 | 1.632536851  | 0.135548119 | 0.135548119 | -4.516023788 |
| 1417061_at   | -0.195228676 | 7.764610334 | -1.632485103 | 0.135559099 | 0.135559099 | -4.516085265 |
| 1439611_at   | 0.126236719  | 5.208069933 | 1.632407655  | 0.135575534 | 0.135575534 | -4.516177271 |
| 1424295_at   | -0.132371176 | 4.422582314 | -1.632097172 | 0.135641438 | 0.135641438 | -4.516546093 |
| 1423261_at   | -0.186491291 | 8.129600712 | -1.631924425 | 0.135678118 | 0.135678118 | -4.516751285 |
| 1457295_at   | 0.165303366  | 6.944080149 | 1.631803457  | 0.135703809 | 0.135703809 | -4.516894966 |
| 1436045_at   | -0.123375743 | 7.296611167 | -1.63174976  | 0.135715215 | 0.135715215 | -4.516958744 |
| 1423392_at   | 0.121965305  | 9.245586282 | 1.631747693  | 0.135715654 | 0.135715654 | -4.516961198 |
| 1443489_at   | 0.162215804  | 6.731919597 | 1.6317339    | 0.135718584 | 0.135718584 | -4.516977581 |
| 1425790_a_at | -0.180341164 | 4.806394583 | -1.631552171 | 0.135757191 | 0.135757191 | -4.517193417 |
| 1437990_x_at | 0.414532472  | 6.119272967 | 1.631293416  | 0.13581218  | 0.13581218  | -4.517500717 |
| 1419727_at   | 0.128476658  | 3.083233984 | 1.631093421  | 0.135854695 | 0.135854695 | -4.517738215 |
| 1443564_at   | 0.175731317  | 3.932695226 | 1.630795154  | 0.135918122 | 0.135918122 | -4.518092387 |
| 1456270_s_at | -0.138644585 | 3.352706661 | -1.630767843 | 0.135923931 | 0.135923931 | -4.518124815 |
| 1439301_at   | 0.147693677  | 6.51584323  | 1.630641583  | 0.13595079  | 0.13595079  | -4.518274731 |
| 1418840_at   | -0.130937513 | 10.48445566 | -1.630576749 | 0.135964584 | 0.135964584 | -4.518351708 |
| 1427780_at   | -0.11327801  | 3.542073047 | -1.63046852  | 0.135987613 | 0.135987613 | -4.518480208 |

|              |              |             |              |             |             |              |
|--------------|--------------|-------------|--------------|-------------|-------------|--------------|
| 1418188_a_at | 0.607408094  | 11.62093326 | 1.630420492  | 0.135997834 | 0.135997834 | -4.518537229 |
| 1459585_at   | -0.14140121  | 4.863652261 | -1.630005903 | 0.136086089 | 0.136086089 | -4.519029418 |
| 1455153_at   | -0.109431048 | 8.048078034 | -1.629895188 | 0.136109665 | 0.136109665 | -4.519160845 |
| 1433574_at   | 0.108700088  | 9.711301048 | 1.62982274   | 0.136125095 | 0.136125095 | -4.519246844 |
| 1441518_at   | -0.166967923 | 4.226040187 | -1.629764722 | 0.136137453 | 0.136137453 | -4.519315713 |
| 1444435_at   | -0.174887321 | 4.32247629  | -1.629571672 | 0.13617858  | 0.13617858  | -4.519544858 |
| 1437757_at   | 0.156181175  | 6.454620132 | 1.629550835  | 0.136183019 | 0.136183019 | -4.519569591 |
| 1451140_s_at | -0.141600473 | 6.882933201 | -1.629515579 | 0.136190532 | 0.136190532 | -4.519611438 |
| 1450944_at   | -0.162763518 | 7.803829621 | -1.629309581 | 0.136234432 | 0.136234432 | -4.519855933 |
| 1425009_at   | 0.114971713  | 3.525820142 | 1.629196652  | 0.136258505 | 0.136258505 | -4.519989961 |
| 1427742_a_at | 0.12001284   | 8.135474247 | 1.629145792  | 0.136269347 | 0.136269347 | -4.520050322 |
| 1443828_x_at | -0.199370839 | 5.885243426 | -1.629101303 | 0.136278832 | 0.136278832 | -4.520103121 |
| 1415811_at   | 0.111125595  | 8.380962569 | 1.629030276  | 0.136293976 | 0.136293976 | -4.520187412 |
| 1455368_at   | 0.153999684  | 6.863602019 | 1.628922698  | 0.136316917 | 0.136316917 | -4.520315079 |
| 1422464_at   | 0.121716216  | 9.259641625 | 1.628922526  | 0.136316953 | 0.136316953 | -4.520315283 |
| 1424037_at   | -0.12906434  | 3.632772339 | -1.628803291 | 0.136342383 | 0.136342383 | -4.520456777 |
| 1420402_at   | 0.214512871  | 3.858065929 | 1.628667061  | 0.136371444 | 0.136371444 | -4.520618435 |
| 1419944_at   | -0.184592745 | 4.81835082  | -1.628576444 | 0.136390777 | 0.136390777 | -4.52072596  |
| 1456686_at   | -0.100610702 | 7.520534813 | -1.62856729  | 0.13639273  | 0.13639273  | -4.520736823 |
| 1447556_x_at | -0.115363987 | 6.225384549 | -1.628493884 | 0.136408393 | 0.136408393 | -4.520823925 |
| 1434488_at   | 0.116030088  | 8.246743839 | 1.628448145  | 0.136418153 | 0.136418153 | -4.520878196 |
| 1444540_at   | -0.136303476 | 5.779276498 | -1.628409097 | 0.136426487 | 0.136426487 | -4.520924528 |
| 1446673_at   | 0.187879017  | 5.26619854  | 1.62840508   | 0.136427344 | 0.136427344 | -4.520929294 |
| 1424524_at   | 0.137113436  | 7.137530749 | 1.628404689  | 0.136427427 | 0.136427427 | -4.520929758 |
| 1436988_at   | 0.158308655  | 6.535250202 | 1.628389493  | 0.13643067  | 0.13643067  | -4.520947789 |
| 1431467_at   | -0.211363876 | 4.336416143 | -1.628307956 | 0.136448073 | 0.136448073 | -4.521044533 |
| 1427605_at   | -0.168730373 | 5.585195114 | -1.62813615  | 0.136484748 | 0.136484748 | -4.521248373 |
| 1449299_at   | -0.135741127 | 5.024650236 | -1.628093848 | 0.13649378  | 0.13649378  | -4.521298562 |
| 1460322_at   | -0.209478738 | 5.309599197 | -1.627923033 | 0.136530255 | 0.136530255 | -4.521501213 |
| 1426704_at   | -0.226455863 | 4.198254122 | -1.627864455 | 0.136542765 | 0.136542765 | -4.521570707 |
| 1454830_at   | -0.188633874 | 10.9855867  | -1.627814759 | 0.13655338  | 0.13655338  | -4.521629663 |
| 1454452_at   | -0.151247925 | 3.988642472 | -1.627807408 | 0.13655495  | 0.13655495  | -4.521638384 |
| 1429897_a_at | 0.112270242  | 8.583169165 | 1.627759994  | 0.136565077 | 0.136565077 | -4.521694631 |
| 1447903_x_at | -0.248208731 | 8.042129697 | -1.627647423 | 0.136589125 | 0.136589125 | -4.521828171 |
| 1458752_at   | 0.138114742  | 3.892823007 | 1.627606853  | 0.136597793 | 0.136597793 | -4.521876297 |
| 1423534_at   | 0.10926904   | 8.059944107 | 1.62751937   | 0.136616485 | 0.136616485 | -4.521980071 |
| 1427686_at   | 0.120381985  | 3.240498682 | 1.627467335  | 0.136627605 | 0.136627605 | -4.522041796 |
| 1417122_at   | 0.123047975  | 7.313881464 | 1.627464838  | 0.136628138 | 0.136628138 | -4.522044757 |
| 1439518_at   | -0.216991678 | 5.920512913 | -1.627287315 | 0.136666079 | 0.136666079 | -4.522255327 |
| 1415940_at   | 0.101850037  | 8.694057169 | 1.627212918  | 0.136681982 | 0.136681982 | -4.52234357  |
| 1433971_at   | 0.248091805  | 5.750147967 | 1.627169272  | 0.136691313 | 0.136691313 | -4.522395339 |
| 1459815_at   | -0.177839333 | 4.161898094 | -1.626985273 | 0.136730654 | 0.136730654 | -4.522613571 |
| 1424117_at   | -0.282811947 | 7.767493592 | -1.62679259  | 0.136771863 | 0.136771863 | -4.522842089 |
| 1452213_at   | 0.106267785  | 7.499518076 | 1.626767952  | 0.136777133 | 0.136777133 | -4.522871308 |
| 1432452_at   | 0.11399205   | 4.760131327 | 1.626658222  | 0.136800607 | 0.136800607 | -4.523001439 |
| 1420447_at   | 0.138962841  | 3.514774392 | 1.626598604  | 0.136813362 | 0.136813362 | -4.52307214  |
| 1456901_at   | -0.148118837 | 8.673932957 | -1.626552026 | 0.136823328 | 0.136823328 | -4.523127375 |
| 1453388_at   | -0.139376855 | 5.414808963 | -1.626466497 | 0.13684163  | 0.13684163  | -4.5232288   |
| 1450373_at   | -0.139894944 | 4.256097588 | -1.626431045 | 0.136849217 | 0.136849217 | -4.523270839 |
| 1443801_at   | 0.264833169  | 6.66320818  | 1.626326715  | 0.136871546 | 0.136871546 | -4.523394553 |
| 1459330_at   | -0.15360275  | 3.832408446 | -1.626089008 | 0.136922433 | 0.136922433 | -4.523676412 |
| 1427787_at   | 0.267299801  | 4.702362531 | 1.625979577  | 0.136945865 | 0.136945865 | -4.523806161 |
| 1445603_at   | -0.147433003 | 3.797622694 | -1.625769485 | 0.136990862 | 0.136990862 | -4.524055251 |

|                |              |             |              |             |             |              |
|----------------|--------------|-------------|--------------|-------------|-------------|--------------|
| 1446258_at     | -0.175906347 | 6.026019261 | -1.625760874 | 0.136992706 | 0.136992706 | -4.524065459 |
| 1455038_at     | -0.145546162 | 8.186792026 | -1.625688415 | 0.137008228 | 0.137008228 | -4.524151364 |
| 1431730_at     | -0.111855979 | 4.971864674 | -1.625650889 | 0.137016268 | 0.137016268 | -4.524195853 |
| 1417236_at     | 0.12721802   | 6.282037323 | 1.625223985  | 0.137107756 | 0.137107756 | -4.524701931 |
| 1443603_at     | 0.246791641  | 6.785019927 | 1.625178861  | 0.13711743  | 0.13711743  | -4.524755419 |
| 1444445_at     | 0.124844045  | 5.391802864 | 1.624924868  | 0.137171891 | 0.137171891 | -4.525056483 |
| 1456582_x_at   | 0.192444391  | 3.734594001 | 1.624870971  | 0.137183451 | 0.137183451 | -4.525120366 |
| 1459839_x_at   | -0.112561673 | 4.726831806 | -1.624848503 | 0.13718827  | 0.13718827  | -4.525146996 |
| 1419266_at     | 0.131736463  | 8.567048426 | 1.624830424  | 0.137192147 | 0.137192147 | -4.525168425 |
| 1417701_at     | -0.181331508 | 7.479394925 | -1.624828753 | 0.137192506 | 0.137192506 | -4.525170404 |
| 1435718_at     | -0.13483897  | 7.331735262 | -1.624790882 | 0.137200629 | 0.137200629 | -4.52521529  |
| 1442253_at     | -0.12283886  | 5.730538606 | -1.624786713 | 0.137201523 | 0.137201523 | -4.525220231 |
| 1440416_at     | -0.254266828 | 5.937777343 | -1.624694989 | 0.137221199 | 0.137221199 | -4.525328944 |
| 1416077_at     | -0.167949921 | 4.633311258 | -1.624500257 | 0.137262981 | 0.137262981 | -4.525559733 |
| 1449063_at     | -0.1244393   | 10.121432   | -1.624465556 | 0.137270427 | 0.137270427 | -4.525600857 |
| 1440351_at     | 0.168716908  | 6.36621558  | 1.624464215  | 0.137270715 | 0.137270715 | -4.525602446 |
| 1428980_at     | -0.118584131 | 4.156918916 | -1.62436696  | 0.137291588 | 0.137291588 | -4.525717703 |
| 1417124_at     | 0.164236748  | 11.20311642 | 1.624342773  | 0.137296779 | 0.137296779 | -4.525746366 |
| 1460554_s_at   | -0.153030063 | 9.696661672 | -1.624174875 | 0.13733282  | 0.13733282  | -4.525945331 |
| 1456960_at     | -0.194920543 | 7.622210305 | -1.624136153 | 0.137341133 | 0.137341133 | -4.525991216 |
| 1425341_at     | -0.141191028 | 4.753525668 | -1.623893868 | 0.13739316  | 0.13739316  | -4.526278312 |
| 1432087_at     | -0.104135962 | 3.792570844 | -1.623868675 | 0.137398571 | 0.137398571 | -4.526308163 |
| 1421421_at     | 0.201581565  | 7.979394055 | 1.623578274  | 0.137460956 | 0.137460956 | -4.526652243 |
| 1423604_at     | -0.152438025 | 3.567100298 | -1.62356262  | 0.137464319 | 0.137464319 | -4.52667079  |
| 1440591_at     | 0.116138129  | 4.036654509 | 1.62343414   | 0.137491928 | 0.137491928 | -4.526823008 |
| 1415959_at     | 0.124429424  | 7.188090546 | 1.623157348  | 0.137551425 | 0.137551425 | -4.52715092  |
| 1448253_at     | 0.124507982  | 9.967341813 | 1.623156185  | 0.137551675 | 0.137551675 | -4.527152298 |
| 1416949_s_at   | -0.148137123 | 9.659259394 | -1.622854264 | 0.1376166   | 0.1376166   | -4.527509949 |
| 1453328_at     | 0.22407517   | 5.896707484 | 1.622710703  | 0.137647481 | 0.137647481 | -4.527679997 |
| 1425225_at     | 0.151403222  | 4.76554375  | 1.622651655  | 0.137660184 | 0.137660184 | -4.527749938 |
| 1435960_at     | -0.201687238 | 7.566060519 | -1.622641975 | 0.137662267 | 0.137662267 | -4.527761404 |
| 1425108_a_at   | -0.20776621  | 6.220436857 | -1.622636239 | 0.137663501 | 0.137663501 | -4.527768198 |
| 1453506_at     | 0.146442042  | 4.712800614 | 1.622603808  | 0.137670479 | 0.137670479 | -4.52780661  |
| AFFX-PheX-5_at | 0.176522307  | 4.109885474 | 1.622599423  | 0.137671422 | 0.137671422 | -4.527811804 |
| 1433112_at     | -0.104097138 | 6.249783551 | -1.622420606 | 0.137709902 | 0.137709902 | -4.528023597 |
| 1437427_at     | 0.145434753  | 4.172718737 | 1.622304281  | 0.137734939 | 0.137734939 | -4.528161366 |
| 1429864_at     | -0.113803199 | 3.607388588 | -1.622105006 | 0.137777839 | 0.137777839 | -4.528397366 |
| 1433991_x_at   | 0.120969495  | 10.46953142 | 1.622054375  | 0.13778874  | 0.13778874  | -4.528457327 |
| 1430986_at     | -0.210317547 | 5.476832017 | -1.621873576 | 0.137827676 | 0.137827676 | -4.52867143  |
| 1428046_a_at   | 0.282089299  | 6.924860675 | 1.621843642  | 0.137834123 | 0.137834123 | -4.528706877 |
| 1429471_at     | -0.39963516  | 7.051979392 | -1.621839141 | 0.137835093 | 0.137835093 | -4.528712207 |
| 1435623_at     | -0.163288377 | 6.684342877 | -1.621819205 | 0.137839387 | 0.137839387 | -4.528735815 |
| 1428712_at     | 0.124348595  | 5.749612412 | 1.621692161  | 0.137866754 | 0.137866754 | -4.528886252 |
| 1416584_at     | -0.157562812 | 5.301283935 | -1.621636492 | 0.137878748 | 0.137878748 | -4.528952169 |
| 1437321_at     | -0.123831339 | 4.116939756 | -1.621608376 | 0.137884806 | 0.137884806 | -4.528985462 |
| 1435970_at     | 0.150914066  | 9.182073903 | 1.621544124  | 0.13789865  | 0.13789865  | -4.52906154  |
| 1437679_a_at   | -0.125702521 | 8.21792754  | -1.621492794 | 0.137909711 | 0.137909711 | -4.529122317 |
| 1431647_a_at   | 0.115248227  | 3.11313107  | 1.621445176  | 0.137919973 | 0.137919973 | -4.529178698 |
| 1429289_at     | -0.124349054 | 3.322415861 | -1.62136693  | 0.137936837 | 0.137936837 | -4.529271342 |
| 1448449_at     | 0.108145714  | 8.064560935 | 1.621323724  | 0.137946149 | 0.137946149 | -4.529322497 |
| 1425011_x_at   | 0.113975233  | 9.468218334 | 1.621267427  | 0.137958284 | 0.137958284 | -4.529389151 |
| 1432174_a_at   | -0.125950616 | 3.871067507 | -1.621141582 | 0.137985414 | 0.137985414 | -4.529538143 |
| 1419136_at     | 0.139100172  | 6.040795592 | 1.621120441  | 0.137989973 | 0.137989973 | -4.529563173 |

|              |              |             |              |             |             |              |
|--------------|--------------|-------------|--------------|-------------|-------------|--------------|
| 1454800_at   | -0.226761576 | 6.857120814 | -1.621109165 | 0.137992404 | 0.137992404 | -4.529576522 |
| 1417977_at   | 0.126212609  | 8.338086055 | 1.620772328  | 0.138065047 | 0.138065047 | -4.529975282 |
| 1438609_x_at | -0.207083855 | 5.603788644 | -1.620761079 | 0.138067473 | 0.138067473 | -4.529988599 |
| 1457881_at   | -0.132325153 | 6.553191893 | -1.620647741 | 0.138091924 | 0.138091924 | -4.530122763 |
| 1456382_at   | 0.149900313  | 6.645691195 | 1.620642013  | 0.13809316  | 0.13809316  | -4.530129544 |
| 1422327_s_at | 0.14168474   | 7.079759757 | 1.620487874  | 0.13812642  | 0.13812642  | -4.530311998 |
| 1428628_at   | -0.215640058 | 4.461916042 | -1.620332532 | 0.138159946 | 0.138159946 | -4.530495869 |
| 1422178_a_at | 0.110603387  | 5.314111422 | 1.620272077  | 0.138172995 | 0.138172995 | -4.530567423 |
| 1453236_at   | -0.138712133 | 3.975612027 | -1.620244643 | 0.138178918 | 0.138178918 | -4.530599894 |
| 1454876_at   | 0.131324915  | 8.124384906 | 1.620164085  | 0.138196309 | 0.138196309 | -4.530695241 |
| 1415850_at   | -0.123538182 | 8.948285296 | -1.620148262 | 0.138199725 | 0.138199725 | -4.530713968 |
| 1431311_at   | 0.13266883   | 4.59174615  | 1.620041861  | 0.138222699 | 0.138222699 | -4.530839897 |
| 1458784_at   | -0.130764994 | 5.387308891 | -1.619991281 | 0.138233621 | 0.138233621 | -4.530899759 |
| 1457188_at   | 0.114182117  | 6.511518048 | 1.619942356  | 0.138244187 | 0.138244187 | -4.53095766  |
| 1443003_at   | 0.165383724  | 4.281734247 | 1.619865931  | 0.138260693 | 0.138260693 | -4.531048106 |
| 1419238_at   | 0.147692859  | 6.302188264 | 1.619637687  | 0.138309999 | 0.138309999 | -4.531318212 |
| 1425003_at   | -0.113142566 | 7.509325279 | -1.619637177 | 0.138310109 | 0.138310109 | -4.531318816 |
| 1451725_a_at | -0.119568586 | 6.117650661 | -1.619549526 | 0.138329048 | 0.138329048 | -4.531422538 |
| 1428544_at   | -0.12675065  | 8.64504332  | -1.619489561 | 0.138342006 | 0.138342006 | -4.531493496 |
| 1421648_at   | -0.11848975  | 3.721227022 | -1.619258591 | 0.138391927 | 0.138391927 | -4.531766797 |
| 1439096_at   | -0.117272524 | 3.356127331 | -1.619142144 | 0.138417101 | 0.138417101 | -4.531904577 |
| 1457420_at   | 0.123656122  | 4.96806321  | 1.619022862  | 0.138442893 | 0.138442893 | -4.532045707 |
| 1450861_at   | -0.14958945  | 7.104788477 | -1.618826165 | 0.138485433 | 0.138485433 | -4.532278422 |
| 1444854_at   | -0.144620671 | 6.18628208  | -1.618689042 | 0.138515096 | 0.138515096 | -4.532440645 |
| 1437867_at   | 0.176523086  | 4.877571964 | 1.618531842  | 0.138549109 | 0.138549109 | -4.532626612 |
| 1420768_a_at | 0.102742605  | 3.755462044 | 1.618501113  | 0.138555759 | 0.138555759 | -4.532662963 |
| 1417383_at   | -0.140683092 | 6.856806435 | -1.618465093 | 0.138563553 | 0.138563553 | -4.532705572 |
| 1420277_at   | -0.182948947 | 4.747001592 | -1.61836985  | 0.138584167 | 0.138584167 | -4.532818238 |
| 1415949_at   | -0.139749871 | 11.30664256 | -1.618360763 | 0.138586133 | 0.138586133 | -4.532828987 |
| 1448269_a_at | -0.143224833 | 9.6399942   | -1.618314132 | 0.138596227 | 0.138596227 | -4.532884146 |
| 1420377_at   | 0.196315192  | 7.293963008 | 1.618110214  | 0.138640372 | 0.138640372 | -4.53312535  |
| 1440864_at   | 0.107712154  | 3.827020234 | 1.618055217  | 0.138652281 | 0.138652281 | -4.533190401 |
| 1446383_at   | -0.1134993   | 8.844024233 | -1.617950671 | 0.138674921 | 0.138674921 | -4.533314055 |
| 1427331_at   | -0.139062481 | 4.857610622 | -1.617892559 | 0.138687506 | 0.138687506 | -4.533382787 |
| 1420055_at   | -0.176280507 | 4.298570785 | -1.617560935 | 0.138759348 | 0.138759348 | -4.533774991 |
| 1431430_s_at | 0.126091143  | 8.061406668 | 1.617417966  | 0.13879033  | 0.13879033  | -4.533944063 |
| 1439154_at   | 0.116343489  | 8.076269048 | 1.61734861   | 0.138805362 | 0.138805362 | -4.53402608  |
| 1435959_at   | 0.165929397  | 4.444079063 | 1.617305562  | 0.138814694 | 0.138814694 | -4.534076986 |
| 1430573_s_at | -0.128674928 | 5.578637131 | -1.617148717 | 0.138848695 | 0.138848695 | -4.534262454 |
| 1425125_at   | 0.133927209  | 3.947514199 | 1.617068972  | 0.138865986 | 0.138865986 | -4.534356749 |
| 1434748_at   | 0.099730659  | 9.163218524 | 1.616998417  | 0.138881286 | 0.138881286 | -4.534440174 |
| 1434239_at   | -0.208843318 | 6.456497648 | -1.616570509 | 0.138974108 | 0.138974108 | -4.534946103 |
| 1441901_x_at | -0.131222485 | 7.902890528 | -1.616475525 | 0.13899472  | 0.13899472  | -4.535058397 |
| 1449331_a_at | -0.207698765 | 5.17876675  | -1.616433497 | 0.139003841 | 0.139003841 | -4.535108083 |
| 1456038_at   | 0.14203949   | 7.525249811 | 1.616132586  | 0.139069161 | 0.139069161 | -4.535463804 |
| 1455208_at   | 0.284088468  | 5.983771439 | 1.616114087  | 0.139073177 | 0.139073177 | -4.535485671 |
| 1421342_at   | -0.187104108 | 3.55145022  | -1.616094502 | 0.13907743  | 0.13907743  | -4.535508823 |
| 1419745_at   | -0.143071332 | 8.174159893 | -1.616067513 | 0.13908329  | 0.13908329  | -4.535540725 |
| 1447402_at   | -0.215836622 | 3.962285269 | -1.616021124 | 0.139093363 | 0.139093363 | -4.53559556  |
| 1445385_at   | -0.231519977 | 5.376667244 | -1.616004037 | 0.139097073 | 0.139097073 | -4.535615757 |
| 1431873_a_at | -0.11779131  | 7.458261019 | -1.616002863 | 0.139097328 | 0.139097328 | -4.535617145 |
| 1422183_a_at | -0.128345807 | 5.581694278 | -1.615998192 | 0.139098343 | 0.139098343 | -4.535622667 |
| 1433185_at   | -0.110183516 | 3.667680748 | -1.615917194 | 0.139115934 | 0.139115934 | -4.535718409 |

|              |              |             |              |             |             |              |
|--------------|--------------|-------------|--------------|-------------|-------------|--------------|
| 1433002_at   | 0.134489846  | 3.817733588 | 1.615847714  | 0.139131024 | 0.139131024 | -4.535800534 |
| 1445743_at   | 0.181311604  | 4.788912497 | 1.615814861  | 0.13913816  | 0.13913816  | -4.535839367 |
| 1454978_at   | -0.149353101 | 9.832675822 | -1.615670717 | 0.139169474 | 0.139169474 | -4.536009738 |
| 1437097_at   | -0.148759542 | 3.859718527 | -1.615419311 | 0.139224104 | 0.139224104 | -4.536306869 |
| 1451561_at   | -0.151396923 | 8.030493199 | -1.615383156 | 0.139231962 | 0.139231962 | -4.536349598 |
| 1446867_at   | -0.122197393 | 5.305159144 | -1.615289525 | 0.139252314 | 0.139252314 | -4.536460251 |
| 1416304_at   | 0.122575982  | 8.752329271 | 1.615259557  | 0.139258828 | 0.139258828 | -4.536495667 |
| 1418282_x_at | -0.114333237 | 4.405744981 | -1.61525008  | 0.139260888 | 0.139260888 | -4.536506867 |
| 1428954_at   | -0.161167885 | 6.969501233 | -1.615029208 | 0.139308911 | 0.139308911 | -4.536767878 |
| 1435582_at   | -0.142177786 | 5.123957496 | -1.614959413 | 0.139324089 | 0.139324089 | -4.536850354 |
| 1425123_at   | -0.131442301 | 5.032072916 | -1.614858635 | 0.139346007 | 0.139346007 | -4.536969438 |
| 1444150_at   | 0.188957216  | 7.46442738  | 1.61479203   | 0.139360495 | 0.139360495 | -4.537048139 |
| 1419126_at   | -0.16219359  | 5.821535728 | -1.614420179 | 0.139441403 | 0.139441403 | -4.537487496 |
| 1459739_at   | 0.129884703  | 3.798441535 | 1.614349408  | 0.139456807 | 0.139456807 | -4.537571108 |
| 1440113_at   | -0.106209337 | 4.003049373 | -1.61409181  | 0.139512886 | 0.139512886 | -4.537875434 |
| 1453416_at   | 0.140677132  | 7.817804554 | 1.614054152  | 0.139521086 | 0.139521086 | -4.537919921 |
| 1422232_at   | 0.190711485  | 6.092763269 | 1.613931066  | 0.139547891 | 0.139547891 | -4.538065324 |
| 1455193_at   | 0.11093469   | 5.072421767 | 1.613878341  | 0.139559374 | 0.139559374 | -4.538127607 |
| 1460694_s_at | 0.101299128  | 10.40011098 | 1.613731409  | 0.13959138  | 0.13959138  | -4.53830117  |
| 1457273_at   | 0.264672308  | 7.735743947 | 1.613632614  | 0.139612904 | 0.139612904 | -4.538417866 |
| 1442101_at   | 0.144516236  | 4.219686228 | 1.613583527  | 0.139623599 | 0.139623599 | -4.538475847 |
| 1428112_at   | -0.128448227 | 11.16033808 | -1.613459538 | 0.139650618 | 0.139650618 | -4.538622295 |
| 1446901_at   | 0.122138718  | 3.124503957 | 1.61327674   | 0.139690461 | 0.139690461 | -4.538838195 |
| 1424786_s_at | 0.10611037   | 7.860547207 | 1.613205981  | 0.139705886 | 0.139705886 | -4.538921764 |
| 1443388_at   | -0.112849357 | 5.602445913 | -1.613093843 | 0.139730335 | 0.139730335 | -4.5390542   |
| 1448078_at   | -0.13351754  | 3.775096328 | -1.613029173 | 0.139744437 | 0.139744437 | -4.539130573 |
| 1437121_at   | 0.144894017  | 5.241226249 | 1.612732732  | 0.139809093 | 0.139809093 | -4.539480643 |
| 1443925_at   | -0.115251283 | 4.468670323 | -1.612721424 | 0.13981156  | 0.13981156  | -4.539493995 |
| 1437869_at   | 0.10127955   | 9.13207059  | 1.612674791  | 0.139821734 | 0.139821734 | -4.539549062 |
| 1427591_at   | -0.203008739 | 5.86355991  | -1.612674243 | 0.139821854 | 0.139821854 | -4.539549709 |
| 1420772_a_at | -0.119675074 | 8.932035033 | -1.612510311 | 0.139857623 | 0.139857623 | -4.539743281 |
| 1439920_at   | 0.321457499  | 6.0431726   | 1.612468996  | 0.139866639 | 0.139866639 | -4.539792063 |
| 1456104_at   | -0.135909783 | 4.266141134 | -1.612324815 | 0.139898108 | 0.139898108 | -4.539962303 |
| 1428892_at   | 0.128682738  | 8.667422815 | 1.612224102  | 0.139920093 | 0.139920093 | -4.540081213 |
| 1423175_s_at | 0.103189573  | 4.072800518 | 1.611936924  | 0.139982799 | 0.139982799 | -4.540420259 |
| 1421131_a_at | 0.180604374  | 5.249521177 | 1.61189527   | 0.139991896 | 0.139991896 | -4.540469434 |
| 1442756_at   | -0.116402025 | 4.428255387 | -1.611869622 | 0.139997498 | 0.139997498 | -4.540499713 |
| 1415995_at   | 0.124237225  | 9.218778562 | 1.611720609  | 0.140030049 | 0.140030049 | -4.540675624 |
| 1421200_at   | -0.126774533 | 4.354425101 | -1.611704052 | 0.140033666 | 0.140033666 | -4.54069517  |
| 1449033_at   | 0.293652751  | 5.023065133 | 1.611562541  | 0.140064585 | 0.140064585 | -4.540862216 |
| 1446442_at   | -0.144911953 | 3.75766528  | -1.611548481 | 0.140067657 | 0.140067657 | -4.540878813 |
| 1423228_at   | -0.157192392 | 6.718374624 | -1.611212221 | 0.140141152 | 0.140141152 | -4.54127572  |
| 1447176_at   | -0.128326364 | 5.142873678 | -1.61116008  | 0.140152552 | 0.140152552 | -4.541337261 |
| 1417408_at   | 0.227542137  | 8.252501539 | 1.611159572  | 0.140152663 | 0.140152663 | -4.541337861 |
| 1447511_at   | 0.125582339  | 3.633308066 | 1.611100882  | 0.140165495 | 0.140165495 | -4.541407131 |
| 1445894_at   | -0.159930629 | 3.851120336 | -1.610972463 | 0.140193577 | 0.140193577 | -4.541558695 |
| 1459549_at   | -0.106454826 | 3.742613009 | -1.61097173  | 0.140193737 | 0.140193737 | -4.54155956  |
| 1423854_a_at | 0.154010699  | 10.64926753 | 1.61080474   | 0.14023026  | 0.14023026  | -4.541756638 |
| 1438935_at   | 0.134429776  | 4.150875217 | 1.610706952  | 0.140251652 | 0.140251652 | -4.541872041 |
| 1437952_at   | -0.104331465 | 3.346954469 | -1.610463699 | 0.140304878 | 0.140304878 | -4.542159095 |
| 1437265_at   | 0.121944851  | 6.176745837 | 1.61024361   | 0.140353052 | 0.140353052 | -4.542418796 |
| 1453550_a_at | 0.160123428  | 7.760903163 | 1.61019105   | 0.140364558 | 0.140364558 | -4.542480814 |
| 1454175_at   | -0.136354342 | 4.19961253  | -1.609989257 | 0.140408743 | 0.140408743 | -4.542718906 |

|              |              |             |              |             |             |              |
|--------------|--------------|-------------|--------------|-------------|-------------|--------------|
| 1460042_at   | -0.204264238 | 4.300431773 | -1.609815165 | 0.140446873 | 0.140446873 | -4.542924303 |
| 1444526_at   | -0.169938029 | 4.38569224  | -1.609793488 | 0.140451621 | 0.140451621 | -4.542949876 |
| 1436639_at   | -0.144334956 | 7.117673279 | -1.609675343 | 0.140477503 | 0.140477503 | -4.543089258 |
| 1415702_a_at | 0.1465506    | 10.99911913 | 1.60961622   | 0.140490456 | 0.140490456 | -4.543159007 |
| 1441973_at   | 0.247548692  | 6.477957861 | 1.609411203  | 0.140535383 | 0.140535383 | -4.54340086  |
| 1417440_at   | -0.162897541 | 9.345672753 | -1.609321746 | 0.140554991 | 0.140554991 | -4.543506385 |
| 1453233_s_at | -0.1460556   | 3.904308938 | -1.609285469 | 0.140562943 | 0.140562943 | -4.543549177 |
| 1441370_at   | -0.222224215 | 6.86058046  | -1.609109004 | 0.14060163  | 0.14060163  | -4.543757328 |
| 1421243_at   | -0.135423592 | 5.821617497 | -1.608968194 | 0.140632507 | 0.140632507 | -4.543923413 |
| 1426575_at   | 0.132591158  | 7.214155876 | 1.608965536  | 0.14063309  | 0.14063309  | -4.543926548 |
| 1435070_at   | 0.183473441  | 7.695678743 | 1.608648035  | 0.140702735 | 0.140702735 | -4.544301013 |
| 1419849_at   | -0.149885369 | 5.413392775 | -1.608490873 | 0.140737221 | 0.140737221 | -4.544486359 |
| 1438735_at   | 0.180351056  | 8.163434575 | 1.608466822  | 0.140742499 | 0.140742499 | -4.544514722 |
| 1422931_at   | -0.172306538 | 5.437998759 | -1.608228821 | 0.140794739 | 0.140794739 | -4.544795383 |
| 1446614_at   | 0.161321081  | 5.912737147 | 1.607912955  | 0.140864096 | 0.140864096 | -4.545167834 |
| 1416128_at   | -0.126414125 | 5.994352291 | -1.607831373 | 0.140882015 | 0.140882015 | -4.545264025 |
| 1424360_at   | -0.149632763 | 6.926630285 | -1.607787948 | 0.140891554 | 0.140891554 | -4.545315226 |
| 1419337_at   | -0.143061349 | 4.092668139 | -1.60778041  | 0.140893209 | 0.140893209 | -4.545324113 |
| 1424718_at   | 0.250348492  | 6.604219582 | 1.607754684  | 0.140898861 | 0.140898861 | -4.545354445 |
| 1418695_a_at | 0.133015267  | 10.3740203  | 1.607682732  | 0.140914668 | 0.140914668 | -4.545439277 |
| 1458800_at   | -0.140271572 | 4.44109544  | -1.607541013 | 0.140945806 | 0.140945806 | -4.54560636  |
| 1430108_at   | -0.173373004 | 4.47228536  | -1.607307158 | 0.140997202 | 0.140997202 | -4.545882053 |
| 1436763_a_at | -0.116268327 | 5.041939861 | -1.607252353 | 0.14100925  | 0.14100925  | -4.54594666  |
| 1444534_at   | -0.134375694 | 4.384202183 | -1.606977421 | 0.1410697   | 0.1410697   | -4.546270748 |
| 1453898_at   | -0.115596135 | 4.620675902 | -1.60695778  | 0.141074019 | 0.141074019 | -4.546293899 |
| 1429539_at   | 0.108918897  | 8.888881735 | 1.606862365  | 0.141095004 | 0.141095004 | -4.546406367 |
| 1430358_at   | -0.121211527 | 5.144710272 | -1.606839022 | 0.141100138 | 0.141100138 | -4.54643388  |
| 1454539_at   | -0.161029994 | 4.095341629 | -1.60668106  | 0.141134887 | 0.141134887 | -4.546620064 |
| 1445299_at   | -0.166673105 | 4.411603222 | -1.606662331 | 0.141139008 | 0.141139008 | -4.546642138 |
| 1456645_at   | -0.142826467 | 5.258071791 | -1.606595386 | 0.141153737 | 0.141153737 | -4.54672104  |
| 1452095_a_at | -0.145732361 | 7.809970036 | -1.606564734 | 0.141160482 | 0.141160482 | -4.546757166 |
| 1457921_at   | 0.146679164  | 5.134309662 | 1.606520051  | 0.141170314 | 0.141170314 | -4.546809829 |
| 1445762_at   | -0.132163401 | 6.587006421 | -1.606484185 | 0.141178207 | 0.141178207 | -4.5468521   |
| 1432696_at   | -0.151907969 | 3.69855026  | -1.606429589 | 0.141190222 | 0.141190222 | -4.546916444 |
| 1420181_at   | -0.136914432 | 4.343598331 | -1.606411272 | 0.141194253 | 0.141194253 | -4.546938031 |
| 1445068_at   | 0.216536095  | 5.637837611 | 1.606353968  | 0.141206866 | 0.141206866 | -4.547005565 |
| 1458389_at   | -0.170236299 | 4.352370037 | -1.606351412 | 0.141207428 | 0.141207428 | -4.547008578 |
| 1421694_a_at | 0.116304484  | 11.01315878 | 1.606137604  | 0.141254496 | 0.141254496 | -4.547260544 |
| 1428839_at   | -0.155216749 | 7.138761141 | -1.6061319   | 0.141255752 | 0.141255752 | -4.547267265 |
| 1457819_at   | 0.15410548   | 3.813808226 | 1.605938467  | 0.141298346 | 0.141298346 | -4.547495206 |
| 1422326_at   | -0.148177887 | 3.309248797 | -1.605852249 | 0.141317335 | 0.141317335 | -4.5475968   |
| 1420458_at   | -0.107757093 | 3.876369265 | -1.605711589 | 0.14134832  | 0.14134832  | -4.547762539 |
| 1457744_at   | 0.203724779  | 8.063527485 | 1.605682056  | 0.141354827 | 0.141354827 | -4.547797337 |
| 1442588_at   | -0.140666014 | 4.139094113 | -1.605514117 | 0.14139183  | 0.14139183  | -4.547995208 |
| 1453842_at   | -0.130244364 | 3.729054734 | -1.605433316 | 0.141409637 | 0.141409637 | -4.548090407 |
| 1429213_at   | -0.115805515 | 7.457403908 | -1.605340874 | 0.141430011 | 0.141430011 | -4.548199318 |
| 1425825_at   | 0.120695653  | 4.463307492 | 1.605290644  | 0.141441083 | 0.141441083 | -4.548258495 |
| 1441779_at   | 0.193602909  | 6.221178612 | 1.605047928  | 0.141494594 | 0.141494594 | -4.548544432 |
| 1441955_s_at | -0.588764021 | 6.10456759  | -1.604811009 | 0.141546845 | 0.141546845 | -4.54882352  |
| 1419450_at   | -0.130606937 | 8.891213518 | -1.604807669 | 0.141547582 | 0.141547582 | -4.548827453 |
| 1449640_at   | -0.122397934 | 3.769435884 | -1.604622603 | 0.141588409 | 0.141588409 | -4.549045444 |
| 1445311_at   | -0.142331565 | 4.96745841  | -1.604469224 | 0.141622254 | 0.141622254 | -4.5492261   |
| 1416457_at   | 0.12819975   | 10.22746693 | 1.604439677  | 0.141628775 | 0.141628775 | -4.5492609   |



|              |              |             |              |             |             |              |
|--------------|--------------|-------------|--------------|-------------|-------------|--------------|
| 1441494_at   | 0.168323892  | 4.348307872 | 1.604430415  | 0.141630819 | 0.141630819 | -4.54927181  |
| 1430187_at   | 0.128898101  | 6.781055815 | 1.604361453  | 0.141646039 | 0.141646039 | -4.549353032 |
| 1441126_at   | 0.138346678  | 5.874762558 | 1.604350798  | 0.141648391 | 0.141648391 | -4.549365581 |
| 1458927_at   | 0.106608237  | 6.600795489 | 1.604299748  | 0.141659659 | 0.141659659 | -4.549425706 |
| 1435468_at   | -0.125627614 | 8.876956486 | -1.604255927 | 0.141669333 | 0.141669333 | -4.549477316 |
| 1439953_at   | 0.344695785  | 5.988036133 | 1.604218303  | 0.141677638 | 0.141677638 | -4.549521626 |
| 1428114_at   | 0.30261399   | 4.284529461 | 1.604181579  | 0.141685746 | 0.141685746 | -4.549564877 |
| 1430284_at   | -0.129331673 | 3.631064353 | -1.604154161 | 0.141691799 | 0.141691799 | -4.549597168 |
| 1460316_at   | -0.125742928 | 6.245058261 | -1.604142723 | 0.141694325 | 0.141694325 | -4.549610639 |
| 1454454_at   | 0.279201983  | 4.712290402 | 1.604086019  | 0.141706844 | 0.141706844 | -4.549677417 |
| 1457770_at   | 0.105780786  | 5.711810848 | 1.604073412  | 0.141709628 | 0.141709628 | -4.549692265 |
| 1456618_at   | -0.125480091 | 5.467552535 | -1.604051242 | 0.141714523 | 0.141714523 | -4.549718373 |
| 1416098_at   | 0.190462211  | 5.662248555 | 1.603896146  | 0.141748774 | 0.141748774 | -4.549901019 |
| 1423291_s_at | -0.113208783 | 9.576093272 | -1.603836478 | 0.141761953 | 0.141761953 | -4.549971284 |
| 1438076_at   | 0.133852452  | 7.888112655 | 1.603660004  | 0.141800938 | 0.141800938 | -4.550179091 |
| 1434322_at   | -0.157734793 | 4.885101831 | -1.603644963 | 0.141804261 | 0.141804261 | -4.550196801 |
| 1460032_at   | 0.142091695  | 7.574918668 | 1.603638478  | 0.141805693 | 0.141805693 | -4.550204437 |
| 1435388_at   | 0.130298725  | 7.011051008 | 1.603632176  | 0.141807086 | 0.141807086 | -4.550211858 |
| 1429348_at   | -0.170113467 | 8.709096185 | -1.60358498  | 0.141817514 | 0.141817514 | -4.550267431 |
| 1458919_at   | 0.130777508  | 6.498382235 | 1.603505339  | 0.141835112 | 0.141835112 | -4.550361207 |
| 1452671_s_at | -0.099864244 | 11.1270242  | -1.603436625 | 0.141850297 | 0.141850297 | -4.550442113 |
| 1418000_a_at | -0.134632487 | 12.09446256 | -1.603390107 | 0.141860578 | 0.141860578 | -4.550496884 |
| 1429206_at   | 0.103562457  | 8.576221462 | 1.603377285  | 0.141863412 | 0.141863412 | -4.550511982 |
| 1437555_at   | 0.134462232  | 3.411772183 | 1.603357267  | 0.141867837 | 0.141867837 | -4.550535551 |
| 1439494_at   | 0.12375041   | 3.338631223 | 1.603251042  | 0.141891317 | 0.141891317 | -4.550660618 |
| 1438042_at   | -0.163374322 | 10.90237939 | -1.603183615 | 0.141906223 | 0.141906223 | -4.550740004 |
| 1419248_at   | 0.134508032  | 8.845089712 | 1.603180805  | 0.141906844 | 0.141906844 | -4.550743312 |
| 1445328_at   | -0.166577362 | 4.04090546  | -1.602978113 | 0.141951662 | 0.141951662 | -4.550981941 |
| 1420781_at   | 0.137269739  | 3.54273496  | 1.602967105  | 0.141954096 | 0.141954096 | -4.550994901 |
| 1455584_at   | 0.113428808  | 8.051921806 | 1.602905631  | 0.141967692 | 0.141967692 | -4.55106727  |
| 1456605_at   | -0.146648886 | 4.541443663 | -1.602900614 | 0.141968801 | 0.141968801 | -4.551073177 |
| 1450831_at   | -0.13340288  | 6.396301191 | -1.602836819 | 0.141982911 | 0.141982911 | -4.551148278 |
| 1427612_at   | 0.121652714  | 3.309365857 | 1.602779157  | 0.141995666 | 0.141995666 | -4.551216157 |
| 1434220_at   | -0.139575338 | 8.741763224 | -1.602535593 | 0.142049553 | 0.142049553 | -4.551502867 |
| 1428219_at   | 0.097446965  | 10.88878298 | 1.602527785  | 0.14205128  | 0.14205128  | -4.551512058 |
| 1423746_at   | -0.14326711  | 11.16199042 | -1.602334125 | 0.14209414  | 0.14209414  | -4.551740007 |
| 1442913_at   | 0.101735685  | 3.188943435 | 1.60223831   | 0.142115349 | 0.142115349 | -4.551852782 |
| 1422468_at   | -0.114335272 | 8.323641223 | -1.602147457 | 0.142135463 | 0.142135463 | -4.551959714 |
| 1429871_at   | -0.217017767 | 6.738265489 | -1.602097222 | 0.142146585 | 0.142146585 | -4.552018837 |
| 1444316_at   | -0.122809345 | 4.064442738 | -1.601963465 | 0.142176204 | 0.142176204 | -4.552176258 |
| 1433666_s_at | 0.120935435  | 9.331664351 | 1.601949592  | 0.142179276 | 0.142179276 | -4.552192584 |
| 1432975_at   | 0.108370141  | 3.807804904 | 1.601726899  | 0.142228601 | 0.142228601 | -4.552454659 |
| 1431489_at   | -0.125047077 | 3.480267908 | -1.601723922 | 0.142229261 | 0.142229261 | -4.552458162 |
| 1422697_s_at | 0.13431728   | 8.935100843 | 1.601718976  | 0.142230357 | 0.142230357 | -4.552463983 |
| 1430010_at   | 0.106942399  | 7.109296548 | 1.601555743  | 0.142266522 | 0.142266522 | -4.552656069 |
| 1446351_at   | 0.244400539  | 4.277454379 | 1.601555042  | 0.142266677 | 0.142266677 | -4.552656895 |
| 1459876_at   | 0.157067567  | 5.846587618 | 1.60116084   | 0.14235405  | 0.14235405  | -4.553120737 |
| 1443290_at   | 0.117583074  | 4.478851537 | 1.601021683  | 0.142384904 | 0.142384904 | -4.553284464 |
| 1430606_at   | -0.164534637 | 5.614154866 | -1.600975763 | 0.142395087 | 0.142395087 | -4.55333849  |
| 1459689_at   | 0.153281059  | 4.203622956 | 1.600912135  | 0.142409198 | 0.142409198 | -4.553413349 |
| 1437132_x_at | -0.143009624 | 8.826406522 | -1.600901862 | 0.142411476 | 0.142411476 | -4.553425434 |
| 1446322_at   | -0.110048896 | 3.389658566 | -1.600899707 | 0.142411954 | 0.142411954 | -4.553427971 |
| 1454288_at   | 0.11461987   | 3.692550634 | 1.600844043  | 0.1424243   | 0.1424243   | -4.553493458 |

|              |              |             |              |             |             |              |
|--------------|--------------|-------------|--------------|-------------|-------------|--------------|
| 1416992_at   | 0.156442751  | 7.178923169 | 1.60081525   | 0.142430687 | 0.142430687 | -4.553527332 |
| 1424759_at   | 0.138721165  | 5.895054371 | 1.600769533  | 0.142440828 | 0.142440828 | -4.553581116 |
| 1415710_at   | -0.120058883 | 8.720407326 | -1.600750866 | 0.142444968 | 0.142444968 | -4.553603076 |
| 1442939_at   | 0.202269908  | 8.197455605 | 1.60070733   | 0.142454626 | 0.142454626 | -4.553654293 |
| 1441002_at   | 0.132521405  | 4.604983199 | 1.600491354  | 0.142502547 | 0.142502547 | -4.553908364 |
| 1418776_at   | -0.126577877 | 3.560377005 | -1.600471804 | 0.142506885 | 0.142506885 | -4.55393136  |
| 1433079_at   | 0.109719554  | 4.347968987 | 1.600440567  | 0.142513817 | 0.142513817 | -4.553968105 |
| 1425141_at   | 0.174566986  | 6.414458334 | 1.600403777  | 0.142521982 | 0.142521982 | -4.554011382 |
| 1422803_at   | 0.169881018  | 6.351587206 | 1.600395787  | 0.142523755 | 0.142523755 | -4.55402078  |
| 1459916_at   | -0.136559207 | 3.551009659 | -1.600315679 | 0.142541535 | 0.142541535 | -4.554115011 |
| 1441152_at   | -0.126306537 | 7.242592682 | -1.6001874   | 0.142570011 | 0.142570011 | -4.554265899 |
| 1416964_at   | 0.110630219  | 7.995030865 | 1.600153862  | 0.142577457 | 0.142577457 | -4.554305347 |
| 1457748_at   | 0.122485761  | 4.636530372 | 1.600152237  | 0.142577818 | 0.142577818 | -4.554307258 |
| 1421488_at   | 0.131082157  | 6.023302655 | 1.600071233  | 0.142595803 | 0.142595803 | -4.554402536 |
| 1452348_s_at | 0.184614782  | 3.738623284 | 1.599986794  | 0.142614553 | 0.142614553 | -4.55450185  |
| 1425995_s_at | -0.133765903 | 4.196652509 | -1.599964092 | 0.142619595 | 0.142619595 | -4.554528551 |
| 1421318_at   | -0.137864634 | 3.816451732 | -1.599942343 | 0.142624424 | 0.142624424 | -4.55455413  |
| 1428479_at   | 0.120526147  | 8.246219874 | 1.599822801  | 0.142650975 | 0.142650975 | -4.554694726 |
| 1432092_a_at | 0.250168683  | 7.241373495 | 1.599810179  | 0.142653778 | 0.142653778 | -4.554709571 |
| 1457538_at   | 0.22310254   | 4.866978948 | 1.599787101  | 0.142658904 | 0.142658904 | -4.554736712 |
| 1437822_at   | -0.141671397 | 6.220709084 | -1.59942017  | 0.142740431 | 0.142740431 | -4.555168226 |
| 1419397_at   | 0.112837591  | 8.785176625 | 1.599072659  | 0.142817681 | 0.142817681 | -4.555576857 |
| 1443074_at   | 0.186366915  | 6.442009103 | 1.598837835  | 0.142869903 | 0.142869903 | -4.555852956 |
| 1433314_at   | 0.120777946  | 4.000669977 | 1.598829393  | 0.14287178  | 0.14287178  | -4.555862881 |
| 1418744_s_at | -0.174164392 | 5.007322203 | -1.598711431 | 0.14289802  | 0.14289802  | -4.556001569 |
| 1429477_at   | 0.106502921  | 8.224467396 | 1.598646679  | 0.142912426 | 0.142912426 | -4.556077696 |
| 1450095_a_at | -0.228055655 | 7.430543546 | -1.598582186 | 0.142926775 | 0.142926775 | -4.556153516 |
| 1453533_at   | -0.141463925 | 3.34505189  | -1.598524283 | 0.142939659 | 0.142939659 | -4.556221589 |
| 1455781_at   | 0.124611952  | 7.246760259 | 1.598364599  | 0.142975195 | 0.142975195 | -4.55640931  |
| 1434864_at   | 0.153751268  | 7.787678694 | 1.598266455  | 0.142997041 | 0.142997041 | -4.556524681 |
| 1425077_at   | -0.129174644 | 5.124949088 | -1.598224491 | 0.143006382 | 0.143006382 | -4.55657401  |
| 1449827_at   | -0.469800041 | 6.115691707 | -1.59821079  | 0.143009432 | 0.143009432 | -4.556590115 |
| 1460220_a_at | -0.132448017 | 8.409728369 | -1.598147953 | 0.143023421 | 0.143023421 | -4.556663979 |
| 1430851_at   | -0.127998557 | 7.023505726 | -1.597982479 | 0.143060266 | 0.143060266 | -4.556858483 |
| 1424034_at   | 0.13647373   | 7.216216614 | 1.597937759  | 0.143070224 | 0.143070224 | -4.556911046 |
| 1442969_at   | 0.163759356  | 4.846385641 | 1.597780132  | 0.143105332 | 0.143105332 | -4.557096315 |
| 1417495_x_at | -0.129165794 | 3.972265312 | -1.597587973 | 0.143148141 | 0.143148141 | -4.557322159 |
| 1439213_at   | 0.141224134  | 3.904053351 | 1.597460529  | 0.143176539 | 0.143176539 | -4.557471935 |
| 1442633_at   | 0.115754845  | 3.960016549 | 1.597456066  | 0.143177534 | 0.143177534 | -4.557477181 |
| 1445192_at   | 0.154207209  | 3.31097409  | 1.597454632  | 0.143177853 | 0.143177853 | -4.557478865 |
| 1433873_s_at | -0.133044835 | 7.948080778 | -1.597440549 | 0.143180992 | 0.143180992 | -4.557495416 |
| 1457178_at   | -0.124428283 | 6.836473475 | -1.597431726 | 0.143182958 | 0.143182958 | -4.557505784 |
| 1448830_at   | 0.157426942  | 8.074261768 | 1.597396405  | 0.14319083  | 0.14319083  | -4.557547293 |
| 1450167_at   | -0.186835829 | 4.895132619 | -1.597331604 | 0.143205272 | 0.143205272 | -4.557623446 |
| 1442604_at   | 0.302330501  | 5.540939722 | 1.597173575  | 0.143240499 | 0.143240499 | -4.557809152 |
| 1450301_at   | 0.126258416  | 3.176684968 | 1.596999577  | 0.143279294 | 0.143279294 | -4.558013611 |
| 1457948_at   | -0.141749624 | 3.595911826 | -1.596890923 | 0.143303525 | 0.143303525 | -4.558141282 |
| 1417485_at   | -0.208075397 | 11.86625739 | -1.596831462 | 0.143316787 | 0.143316787 | -4.558211149 |
| 1450003_at   | -0.137351215 | 4.518298067 | -1.596795456 | 0.143324818 | 0.143324818 | -4.558253455 |
| 1423622_a_at | 0.137654642  | 10.75610405 | 1.596566755  | 0.143375839 | 0.143375839 | -4.55852216  |
| 1434780_at   | 0.134299307  | 5.93851105  | 1.596560507  | 0.143377233 | 0.143377233 | -4.5585295   |
| 1460710_at   | -0.117842913 | 7.580820828 | -1.596507401 | 0.143389083 | 0.143389083 | -4.558591893 |
| 1454124_at   | -0.117116134 | 4.706400732 | -1.596493772 | 0.143392124 | 0.143392124 | -4.558607905 |

|              |              |             |              |             |             |              |
|--------------|--------------|-------------|--------------|-------------|-------------|--------------|
| 1453262_at   | -0.117270659 | 4.993662529 | -1.596475146 | 0.14339628  | 0.14339628  | -4.558629787 |
| 1458479_at   | -0.163324832 | 6.601593654 | -1.596434968 | 0.143405246 | 0.143405246 | -4.55867699  |
| 1424998_at   | 0.130511597  | 3.8863957   | 1.596410683  | 0.143410666 | 0.143410666 | -4.55870552  |
| 1429210_at   | 0.201694874  | 8.056002838 | 1.596398178  | 0.143413457 | 0.143413457 | -4.558720212 |
| 1451651_at   | -0.13221484  | 3.97950592  | -1.596326686 | 0.143429413 | 0.143429413 | -4.558804201 |
| 1450782_at   | 0.135330935  | 8.015398076 | 1.596290207  | 0.143437555 | 0.143437555 | -4.558847055 |
| 1434700_at   | 0.247196693  | 8.956418351 | 1.596285383  | 0.143438632 | 0.143438632 | -4.558852723 |
| 1460684_at   | 0.183385068  | 7.780622063 | 1.59608761   | 0.143482784 | 0.143482784 | -4.559085054 |
| 1452323_at   | -0.119827951 | 7.170011671 | -1.595949624 | 0.143513595 | 0.143513595 | -4.559247143 |
| 1446626_at   | 0.154084748  | 5.340017097 | 1.595784332  | 0.143550512 | 0.143550512 | -4.559441297 |
| 1443213_at   | 0.133693235  | 6.146564763 | 1.595762824  | 0.143555316 | 0.143555316 | -4.55946656  |
| 1455982_at   | 0.119420688  | 6.676396902 | 1.595692992  | 0.143570916 | 0.143570916 | -4.559548582 |
| 1453336_at   | -0.113488471 | 5.928428514 | -1.595556715 | 0.143601362 | 0.143601362 | -4.559708642 |
| 1429380_at   | 0.142989133  | 5.261164415 | 1.595422124  | 0.143631438 | 0.143631438 | -4.559866717 |
| 1445814_at   | 0.133881075  | 4.29792051  | 1.595347918  | 0.143648022 | 0.143648022 | -4.559953866 |
| 1425533_a_at | 0.163593708  | 8.800377889 | 1.59511564   | 0.143699946 | 0.143699946 | -4.560226649 |
| 1448070_at   | 0.126742231  | 4.9356477   | 1.595039309  | 0.143717012 | 0.143717012 | -4.560316286 |
| 1425488_at   | 0.190642084  | 7.415167843 | 1.595004667  | 0.143724758 | 0.143724758 | -4.560356966 |
| 1433870_at   | -0.143439229 | 4.797753758 | -1.594967902 | 0.14373298  | 0.14373298  | -4.560400139 |
| 1443955_at   | 0.115103208  | 7.760520336 | 1.594830755  | 0.143763652 | 0.143763652 | -4.560561184 |
| 1446081_at   | -0.145212336 | 6.545321454 | -1.59482403  | 0.143765156 | 0.143765156 | -4.560569081 |
| 1445758_at   | -0.15746033  | 8.805944859 | -1.594768838 | 0.143777501 | 0.143777501 | -4.560633888 |
| 1418406_at   | -0.150747118 | 8.41314298  | -1.594598532 | 0.1438156   | 0.1438156   | -4.560833857 |
| 1425191_at   | -0.140841986 | 5.368004124 | -1.594532961 | 0.143830271 | 0.143830271 | -4.560910846 |
| 1418272_at   | -0.165566743 | 4.015692063 | -1.594531403 | 0.14383062  | 0.14383062  | -4.560912676 |
| 1448294_at   | -0.112104966 | 5.949729727 | -1.594454481 | 0.143847833 | 0.143847833 | -4.56100299  |
| 1451285_at   | 0.123932011  | 12.00549398 | 1.594289366  | 0.143884786 | 0.143884786 | -4.561196844 |
| 1421803_at   | 0.144330294  | 3.69966312  | 1.594230796  | 0.143897897 | 0.143897897 | -4.561265607 |
| 1421007_at   | -0.133136151 | 6.231768478 | -1.594128349 | 0.143920831 | 0.143920831 | -4.561385877 |
| 1460452_at   | -0.206163486 | 7.165027646 | -1.594029061 | 0.143943061 | 0.143943061 | -4.561502436 |
| 1434469_at   | -0.105307876 | 8.579242    | -1.593991356 | 0.143951504 | 0.143951504 | -4.561546699 |
| 1452558_at   | -0.117343622 | 3.188707745 | -1.593975637 | 0.143955024 | 0.143955024 | -4.561565152 |
| 1422402_a_at | -0.109553481 | 4.651447094 | -1.593925323 | 0.143966292 | 0.143966292 | -4.561624216 |
| 1430743_at   | -0.157781301 | 4.329690914 | -1.59386292  | 0.143980267 | 0.143980267 | -4.561697469 |
| 1443379_at   | -0.225204331 | 6.206376569 | -1.593847258 | 0.143983775 | 0.143983775 | -4.561715854 |
| 1417857_at   | 0.140146039  | 7.756430093 | 1.593778361  | 0.143999206 | 0.143999206 | -4.561796729 |
| 1446395_at   | 0.216478237  | 4.829224235 | 1.593545664  | 0.144051337 | 0.144051337 | -4.562069866 |
| 1419437_at   | -0.226080241 | 8.875395209 | -1.593524505 | 0.144056078 | 0.144056078 | -4.562094701 |
| 1419498_at   | -0.115946649 | 3.312902178 | -1.593473192 | 0.144067576 | 0.144067576 | -4.562154929 |
| 1459323_at   | -0.140420029 | 6.001027395 | -1.593324296 | 0.144100945 | 0.144100945 | -4.562329687 |
| 1442689_at   | -0.151774438 | 3.584326476 | -1.593269631 | 0.144113198 | 0.144113198 | -4.562393845 |
| 1453925_at   | -0.130301742 | 3.463467873 | -1.59318383  | 0.144132431 | 0.144132431 | -4.562494543 |
| 1438001_x_at | -0.144735867 | 9.676198586 | -1.593163078 | 0.144137083 | 0.144137083 | -4.562518898 |
| 1422644_at   | -0.299397592 | 5.32416256  | -1.592994504 | 0.144174879 | 0.144174879 | -4.562716732 |
| 1421076_at   | -0.101169365 | 7.423879374 | -1.592936672 | 0.144187847 | 0.144187847 | -4.562784599 |
| 1458683_at   | 0.126708037  | 4.295409017 | 1.592888876  | 0.144198566 | 0.144198566 | -4.562840688 |
| 1444776_at   | -0.119986574 | 3.787202027 | -1.592871943 | 0.144202364 | 0.144202364 | -4.562860559 |
| 1418519_at   | -0.131409612 | 4.665318795 | -1.592702269 | 0.144240421 | 0.144240421 | -4.563059665 |
| 1451390_s_at | 0.12887173   | 6.954248577 | 1.592598112  | 0.144263788 | 0.144263788 | -4.563181885 |
| 1423928_at   | -0.117264058 | 7.493758854 | -1.592378969 | 0.144312962 | 0.144312962 | -4.563439016 |
| 1444347_at   | 0.179399835  | 4.611392456 | 1.592299229  | 0.144330859 | 0.144330859 | -4.563532574 |
| 1425893_a_at | -0.183203006 | 6.324726903 | -1.592203574 | 0.14435233  | 0.14435233  | -4.563644803 |
| 1429938_at   | 0.122549315  | 3.775736065 | 1.591985957  | 0.144401189 | 0.144401189 | -4.563900112 |

|              |              |             |              |             |             |              |
|--------------|--------------|-------------|--------------|-------------|-------------|--------------|
| 1427946_s_at | 0.146948213  | 7.740591313 | 1.591695346  | 0.144466458 | 0.144466458 | -4.564241029 |
| 1459171_at   | 0.209415709  | 6.056023363 | 1.591586171  | 0.144490985 | 0.144490985 | -4.564369095 |
| 1431174_at   | -0.124209425 | 4.747466612 | -1.591537062 | 0.144502019 | 0.144502019 | -4.5644267   |
| 1439658_at   | -0.401604299 | 4.136083288 | -1.591354076 | 0.144543139 | 0.144543139 | -4.564641335 |
| 1438778_at   | -0.180538426 | 5.354389015 | -1.591335993 | 0.144547203 | 0.144547203 | -4.564662545 |
| 1438599_at   | 0.149384519  | 4.235160617 | 1.591329298  | 0.144548708 | 0.144548708 | -4.564670398 |
| 1431882_at   | -0.154267035 | 5.343742443 | -1.591252851 | 0.144565891 | 0.144565891 | -4.564760063 |
| 1436127_at   | -0.102092956 | 3.521596597 | -1.59120933  | 0.144575673 | 0.144575673 | -4.564811107 |
| 1424230_at   | 0.125180945  | 4.084370528 | 1.591190558  | 0.144579893 | 0.144579893 | -4.564833125 |
| 1452489_at   | -0.154000486 | 4.751382518 | -1.591154572 | 0.144587983 | 0.144587983 | -4.564875331 |
| 1454785_at   | -0.101501936 | 9.873900957 | -1.591094099 | 0.144601578 | 0.144601578 | -4.564946256 |
| 1450051_at   | 0.307932146  | 8.77305515  | 1.59105833   | 0.14460962  | 0.14460962  | -4.564988206 |
| 1415820_x_at | 0.106424689  | 11.07897078 | 1.591049717  | 0.144611557 | 0.144611557 | -4.564998308 |
| 1426818_at   | -0.258438655 | 7.070025163 | -1.591019265 | 0.144618404 | 0.144618404 | -4.565034022 |
| 1419755_at   | -0.126373026 | 4.252385699 | -1.590922947 | 0.144640062 | 0.144640062 | -4.565146982 |
| 1422048_at   | -0.138396594 | 4.370937639 | -1.590908813 | 0.144643241 | 0.144643241 | -4.565163558 |
| 1439651_at   | -0.262027113 | 7.537471481 | -1.590883398 | 0.144648956 | 0.144648956 | -4.565193363 |
| 1431316_at   | 0.148044968  | 7.349556528 | 1.590743753  | 0.144680365 | 0.144680365 | -4.565357127 |
| 1427899_at   | -0.140024653 | 8.462559058 | -1.590582882 | 0.144716554 | 0.144716554 | -4.565545776 |
| 1450524_at   | -0.112290645 | 4.591913378 | -1.590385428 | 0.144760985 | 0.144760985 | -4.56577731  |
| 1430328_at   | 0.180348209  | 6.753562931 | 1.590292593  | 0.144781879 | 0.144781879 | -4.565886163 |
| 1451873_a_at | 0.103257618  | 7.291644741 | 1.590110638  | 0.144822838 | 0.144822838 | -4.566099503 |
| 1437823_at   | 0.145065901  | 4.201352259 | 1.590029438  | 0.144841119 | 0.144841119 | -4.566194705 |
| 1458132_at   | -0.11926003  | 5.340927387 | -1.589977241 | 0.144852873 | 0.144852873 | -4.566255902 |
| 1438856_x_at | 0.282832603  | 6.46272406  | 1.589949541  | 0.14485911  | 0.14485911  | -4.566288377 |
| 1424097_at   | 0.231897868  | 5.908367439 | 1.589863447  | 0.144878498 | 0.144878498 | -4.566389313 |
| 1457020_at   | 0.175919232  | 8.066096817 | 1.589837448  | 0.144884354 | 0.144884354 | -4.566419793 |
| 1437419_at   | 0.119118188  | 6.550993392 | 1.589620254  | 0.144933277 | 0.144933277 | -4.566674412 |
| 1445123_at   | 0.160909434  | 3.95508396  | 1.589591876  | 0.14493967  | 0.14493967  | -4.566707678 |
| 1447718_at   | -0.098951842 | 3.082847738 | -1.589569949 | 0.144944611 | 0.144944611 | -4.566733382 |
| 1434699_at   | 0.126075906  | 8.730441429 | 1.589395422  | 0.144983937 | 0.144983937 | -4.566937966 |
| 1434971_x_at | 0.108105786  | 9.822534671 | 1.589387619  | 0.144985695 | 0.144985695 | -4.566947113 |
| 1451653_a_at | -0.249781576 | 6.834688961 | -1.589284676 | 0.145008896 | 0.145008896 | -4.567067779 |
| 1460050_x_at | -0.099452746 | 6.969032245 | -1.589218391 | 0.145023837 | 0.145023837 | -4.567145473 |
| 1440515_at   | -0.132214398 | 4.935272113 | -1.589116383 | 0.145046832 | 0.145046832 | -4.567265038 |
| 1445384_at   | 0.119434303  | 3.26432275  | 1.589079066  | 0.145055245 | 0.145055245 | -4.567308776 |
| 1421152_a_at | 0.182193452  | 6.817785533 | 1.5888826    | 0.145099546 | 0.145099546 | -4.567539039 |
| 1455593_at   | -0.134256614 | 3.951045415 | -1.588770298 | 0.145124874 | 0.145124874 | -4.567670654 |
| 1434360_s_at | 0.130587494  | 8.996921707 | 1.58867628   | 0.145146081 | 0.145146081 | -4.567780837 |
| 1446669_at   | -0.263298457 | 7.512516382 | -1.588620856 | 0.145158584 | 0.145158584 | -4.567845789 |
| 1447514_at   | 0.172707546  | 3.735706284 | 1.588535999  | 0.145177729 | 0.145177729 | -4.567945232 |
| 1449141_at   | 0.132006516  | 8.082108084 | 1.588370185  | 0.145215145 | 0.145215145 | -4.568139538 |
| 1416652_at   | -0.14219372  | 10.96865224 | -1.588320658 | 0.145226323 | 0.145226323 | -4.568197573 |
| 1449117_at   | 0.117882412  | 10.38786737 | 1.588168686  | 0.145260625 | 0.145260625 | -4.568375646 |
| 1417523_at   | 0.117242209  | 5.564678592 | 1.587909974  | 0.145319038 | 0.145319038 | -4.568678772 |
| 1459021_at   | 0.222664148  | 5.476645633 | 1.587773312  | 0.145349902 | 0.145349902 | -4.568838886 |
| 1429151_at   | 0.104609393  | 10.36227741 | 1.587764477  | 0.145351897 | 0.145351897 | -4.568849237 |
| 1421518_at   | -0.119103435 | 4.940284662 | -1.587740731 | 0.145357261 | 0.145357261 | -4.568877057 |
| 1447755_at   | 0.172779113  | 4.163435349 | 1.587566721  | 0.14539657  | 0.14539657  | -4.569080914 |
| 1439563_at   | -0.206922771 | 4.987159542 | -1.587535597 | 0.145403602 | 0.145403602 | -4.569117376 |
| 1443507_at   | -0.103411025 | 3.522748395 | -1.58752868  | 0.145405165 | 0.145405165 | -4.56912548  |
| 1422179_at   | 0.167250826  | 4.069878214 | 1.587122968  | 0.145496857 | 0.145496857 | -4.569600732 |
| 1453387_at   | 0.21198879   | 6.486953108 | 1.58707691   | 0.14550727  | 0.14550727  | -4.569654682 |

|              |              |             |              |             |             |              |
|--------------|--------------|-------------|--------------|-------------|-------------|--------------|
| 1447131_at   | -0.184036897 | 4.82875689  | -1.587050575 | 0.145513224 | 0.145513224 | -4.569685528 |
| 1415864_at   | 0.180437811  | 8.16679868  | 1.587050188  | 0.145513312 | 0.145513312 | -4.569685981 |
| 1426189_at   | 0.147886698  | 4.008110838 | 1.586992905  | 0.145526263 | 0.145526263 | -4.569753076 |
| 1445788_at   | 0.164104015  | 5.284755726 | 1.586876013  | 0.145552696 | 0.145552696 | -4.569889987 |
| 1434290_at   | 0.142336964  | 8.405027819 | 1.586825491  | 0.145564121 | 0.145564121 | -4.56994916  |
| 1437415_at   | -0.13829724  | 3.30348645  | -1.58679179  | 0.145571743 | 0.145571743 | -4.56998863  |
| 1418669_at   | -0.10985848  | 8.585458685 | -1.586774196 | 0.145575723 | 0.145575723 | -4.570009237 |
| 1416097_at   | 0.110881615  | 5.257377258 | 1.586601591  | 0.145614767 | 0.145614767 | -4.570211386 |
| 1454339_at   | -0.118667603 | 3.906080027 | -1.58655881  | 0.145624445 | 0.145624445 | -4.570261487 |
| 1420126_at   | -0.121166845 | 3.27997106  | -1.586085911 | 0.145731471 | 0.145731471 | -4.570815264 |
| 1442456_at   | 0.16896716   | 3.393347905 | 1.586042814  | 0.145741228 | 0.145741228 | -4.570865727 |
| 1451461_a_at | 0.172187098  | 8.114648014 | 1.585769423  | 0.145803137 | 0.145803137 | -4.571185832 |
| 1428405_at   | 0.154142583  | 10.23128174 | 1.585768155  | 0.145803424 | 0.145803424 | -4.571187317 |
| 1427149_at   | -0.160502816 | 5.646813912 | -1.585742373 | 0.145809264 | 0.145809264 | -4.571217503 |
| 1460515_at   | -0.213359717 | 3.661593863 | -1.5857348   | 0.145810979 | 0.145810979 | -4.57122637  |
| 1426825_at   | 0.151187437  | 8.728423222 | 1.585701146  | 0.145818602 | 0.145818602 | -4.571265771 |
| 1418671_at   | 0.14671694   | 6.36352246  | 1.585650019  | 0.145830183 | 0.145830183 | -4.57132563  |
| 1417191_at   | -0.109623903 | 8.828683965 | -1.585599598 | 0.145841606 | 0.145841606 | -4.571384662 |
| 1451766_at   | -0.16916975  | 6.149539194 | -1.585572349 | 0.145847779 | 0.145847779 | -4.571416562 |
| 1457263_at   | -0.133126202 | 4.214820366 | -1.585506234 | 0.145862758 | 0.145862758 | -4.571493965 |
| 1418309_at   | 0.195615726  | 5.322683456 | 1.585383313  | 0.145890611 | 0.145890611 | -4.571637868 |
| 1424711_at   | -0.15517783  | 8.067113522 | -1.585331136 | 0.145902436 | 0.145902436 | -4.57169895  |
| 1436919_at   | -0.11543456  | 7.529664861 | -1.585173303 | 0.145938209 | 0.145938209 | -4.571883712 |
| 1454805_at   | 0.145294506  | 9.855488511 | 1.584848412  | 0.146011872 | 0.146011872 | -4.572264007 |
| 1432431_s_at | 0.121977047  | 7.064853827 | 1.584822932  | 0.14601765  | 0.14601765  | -4.572293831 |
| 1431158_at   | 0.139334772  | 7.295744362 | 1.584792137  | 0.146024634 | 0.146024634 | -4.572329875 |
| 1455893_at   | 0.268028928  | 7.052533912 | 1.584686306  | 0.146048638 | 0.146048638 | -4.572453741 |
| 1438234_at   | 0.122129218  | 7.460891439 | 1.58459884   | 0.146068479 | 0.146068479 | -4.572556111 |
| 1425168_at   | -0.132841391 | 3.410135881 | -1.584505683 | 0.146089614 | 0.146089614 | -4.572665138 |
| 1434092_at   | -0.150632568 | 4.578204989 | -1.584269594 | 0.146143189 | 0.146143189 | -4.572941431 |
| 1419766_at   | -0.173937494 | 5.639971749 | -1.584254501 | 0.146146614 | 0.146146614 | -4.572959094 |
| 1421274_at   | 0.12651471   | 3.270403369 | 1.584251531  | 0.146147289 | 0.146147289 | -4.57296257  |
| 1447440_at   | 0.169170856  | 4.304698557 | 1.584244116  | 0.146148971 | 0.146148971 | -4.572971246 |
| 1442796_at   | 0.112226057  | 3.507620976 | 1.584058357  | 0.146191139 | 0.146191139 | -4.573188622 |
| 1424558_a_at | -0.155653873 | 4.222312273 | -1.583994862 | 0.146205555 | 0.146205555 | -4.573262922 |
| 1448028_at   | 0.198588395  | 8.737889663 | 1.583956507  | 0.146214263 | 0.146214263 | -4.573307802 |
| 1426655_a_at | 0.159362715  | 7.562573222 | 1.583831775  | 0.146242587 | 0.146242587 | -4.573453752 |
| 1441778_at   | 0.165400272  | 3.337394916 | 1.583508763  | 0.14631596  | 0.14631596  | -4.573831682 |
| 1432071_at   | -0.169214855 | 4.624529572 | -1.583479376 | 0.146322637 | 0.146322637 | -4.573866064 |
| 1455645_at   | -0.460171559 | 6.241575984 | -1.5833477   | 0.146352558 | 0.146352558 | -4.574020115 |
| 1453557_at   | -0.219970541 | 4.85664291  | -1.583081563 | 0.146413049 | 0.146413049 | -4.574331454 |
| 1425197_at   | 0.20202411   | 6.152253368 | 1.583037548  | 0.146423055 | 0.146423055 | -4.574382943 |
| 1421592_at   | 0.252975     | 6.079991713 | 1.582883066  | 0.146458181 | 0.146458181 | -4.574563649 |
| 1424346_at   | -0.111908679 | 8.874397659 | -1.582857507 | 0.146463993 | 0.146463993 | -4.574593545 |
| 1447940_a_at | -0.140292814 | 6.785545882 | -1.582781512 | 0.146481275 | 0.146481275 | -4.574682437 |
| 1421497_at   | -0.132742398 | 5.757209237 | -1.582768784 | 0.14648417  | 0.14648417  | -4.574697324 |
| 1431256_at   | 0.250550196  | 5.958502498 | 1.5824765    | 0.146550659 | 0.146550659 | -4.575039186 |
| 1429437_at   | 0.12635725   | 5.586894943 | 1.582442193  | 0.146558465 | 0.146558465 | -4.57507931  |
| 1450265_at   | -0.116350286 | 5.058453872 | -1.582399467 | 0.146568187 | 0.146568187 | -4.575129279 |
| 1428250_at   | -0.196152102 | 5.674628747 | -1.58205611  | 0.146646336 | 0.146646336 | -4.575530826 |
| 1441887_x_at | 0.143243041  | 3.071947974 | 1.582030255  | 0.146652223 | 0.146652223 | -4.575561062 |
| 1428841_at   | 0.143739727  | 6.648993457 | 1.581976062  | 0.146664561 | 0.146664561 | -4.575624434 |
| 1438144_x_at | -0.127495409 | 6.457225354 | -1.581962203 | 0.146667716 | 0.146667716 | -4.575640641 |

|              |              |             |              |             |             |              |
|--------------|--------------|-------------|--------------|-------------|-------------|--------------|
| 1452352_at   | -0.225087092 | 5.089936768 | -1.581703021 | 0.14672674  | 0.14672674  | -4.575943708 |
| 1429469_at   | 0.116982969  | 7.538082786 | 1.581548021  | 0.146762047 | 0.146762047 | -4.57612494  |
| 1446677_at   | 0.137204083  | 3.769454814 | 1.581512438  | 0.146770154 | 0.146770154 | -4.576166544 |
| 1445777_at   | 0.171515175  | 4.414446604 | 1.581440957  | 0.14678644  | 0.14678644  | -4.576250118 |
| 1447500_at   | 0.304800005  | 5.309413117 | 1.581218865  | 0.146837052 | 0.146837052 | -4.576509773 |
| 1417389_at   | -0.154869724 | 9.223567797 | -1.581169381 | 0.146848331 | 0.146848331 | -4.576567623 |
| 1458169_at   | -0.125667216 | 4.624668142 | -1.581147181 | 0.146853391 | 0.146853391 | -4.576593578 |
| 1443395_at   | 0.104046943  | 3.085847933 | 1.581115528  | 0.146860607 | 0.146860607 | -4.576630581 |
| 1446112_at   | -0.141887925 | 3.752275095 | -1.581070154 | 0.14687095  | 0.14687095  | -4.576683625 |
| 1421236_at   | -0.112006282 | 5.985108652 | -1.58095557  | 0.146897074 | 0.146897074 | -4.576817575 |
| 1434256_s_at | 0.134816616  | 8.291935209 | 1.580877519  | 0.146914871 | 0.146914871 | -4.576908815 |
| 1423432_at   | 0.128440822  | 9.500994066 | 1.580653848  | 0.146965882 | 0.146965882 | -4.577170267 |
| 1447906_at   | 0.21580058   | 3.81953297  | 1.580631652  | 0.146970945 | 0.146970945 | -4.577196211 |
| 1454131_at   | -0.127451681 | 4.235956768 | -1.580587204 | 0.146981084 | 0.146981084 | -4.577248165 |
| 1456054_a_at | 0.156031195  | 9.838445594 | 1.580525592  | 0.14699514  | 0.14699514  | -4.577320179 |
| 1443428_at   | -0.111376006 | 3.711837733 | -1.580525478 | 0.146995166 | 0.146995166 | -4.577320313 |
| 1426305_at   | -0.123490557 | 5.702867499 | -1.580492396 | 0.147002713 | 0.147002713 | -4.577358979 |
| 1422991_at   | 0.109466623  | 4.308584308 | 1.580385159  | 0.147027182 | 0.147027182 | -4.577484317 |
| 1429931_at   | 0.13413668   | 4.761087266 | 1.580300784  | 0.147046436 | 0.147046436 | -4.577582931 |
| 1428290_at   | -0.139189308 | 8.392998716 | -1.580254836 | 0.147056922 | 0.147056922 | -4.577636631 |
| 1438766_at   | 0.155085846  | 6.447168781 | 1.580090685  | 0.14709439  | 0.14709439  | -4.577828473 |
| 1433646_at   | -0.107881692 | 7.254417633 | -1.579889721 | 0.147140271 | 0.147140271 | -4.578063323 |
| 1445348_at   | 0.111394286  | 3.410436166 | 1.579850313  | 0.14714927  | 0.14714927  | -4.578109374 |
| 1454101_at   | 0.124535661  | 4.234271718 | 1.579673091  | 0.147189744 | 0.147189744 | -4.578316464 |
| 1434083_a_at | -0.172261264 | 4.347525795 | -1.579529874 | 0.14722246  | 0.14722246  | -4.578483809 |
| 1432958_at   | 0.120855187  | 3.972680305 | 1.5794798    | 0.1472339   | 0.1472339   | -4.578542317 |
| 1424638_at   | -0.170203756 | 10.14298438 | -1.579295533 | 0.147276004 | 0.147276004 | -4.578757613 |
| 1440742_at   | 0.154949661  | 5.051160386 | 1.579241768  | 0.147288292 | 0.147288292 | -4.578820429 |
| 1450441_at   | -0.425737748 | 5.666949668 | -1.579153483 | 0.14730847  | 0.14730847  | -4.578923574 |
| 1418596_at   | -0.328725546 | 5.83132082  | -1.579097349 | 0.147321301 | 0.147321301 | -4.578989154 |
| 1424816_at   | 0.152677973  | 6.442470373 | 1.579054989  | 0.147330985 | 0.147330985 | -4.579038642 |
| 1452538_at   | -0.143367399 | 3.683350305 | -1.579026109 | 0.147337587 | 0.147337587 | -4.579072381 |
| 1418484_at   | 0.157685421  | 7.656045606 | 1.578962645  | 0.147352096 | 0.147352096 | -4.579146523 |
| 1456862_at   | 0.233579543  | 7.228401699 | 1.578791048  | 0.147391334 | 0.147391334 | -4.579346982 |
| 1451367_at   | -0.155895868 | 6.215149016 | -1.578749011 | 0.147400947 | 0.147400947 | -4.579396087 |
| 1432190_at   | -0.114278351 | 4.022842446 | -1.578406118 | 0.147479386 | 0.147479386 | -4.579796614 |
| 1450436_s_at | 0.120400159  | 7.130010946 | 1.578254881  | 0.147513994 | 0.147513994 | -4.579973257 |
| 1427093_at   | -0.150042937 | 6.74852048  | -1.578236602 | 0.147518177 | 0.147518177 | -4.579994606 |
| 1419775_at   | -0.142200316 | 3.500063077 | -1.578142435 | 0.14753973  | 0.14753973  | -4.580104586 |
| 1455447_at   | 0.18074181   | 9.136788958 | 1.578063206  | 0.147557865 | 0.147557865 | -4.580197117 |
| 1455244_at   | 0.107039988  | 9.10511724  | 1.578036941  | 0.147563878 | 0.147563878 | -4.580227792 |
| 1455621_at   | 0.115432956  | 5.07588261  | 1.577970283  | 0.147579139 | 0.147579139 | -4.580305639 |
| 1425996_a_at | 0.143851708  | 6.176232468 | 1.577963697  | 0.147580646 | 0.147580646 | -4.580313331 |
| 1419610_at   | 0.151675664  | 3.287350976 | 1.577876261  | 0.147600666 | 0.147600666 | -4.58041544  |
| 1447592_at   | -0.144082944 | 4.871957797 | -1.577871165 | 0.147601833 | 0.147601833 | -4.580421392 |
| 1456315_a_at | -0.135911458 | 9.444980844 | -1.577502165 | 0.147686347 | 0.147686347 | -4.580852288 |
| 1448119_at   | 0.157489668  | 7.827935469 | 1.577475735  | 0.147692402 | 0.147692402 | -4.580883149 |
| 1457975_at   | -0.157212745 | 5.176762676 | -1.57735448  | 0.147720185 | 0.147720185 | -4.581024731 |
| 1439588_at   | 0.159574964  | 5.115818666 | 1.577338948  | 0.147723744 | 0.147723744 | -4.581042867 |
| 1433196_at   | -0.153803193 | 4.14745535  | -1.577290415 | 0.147734865 | 0.147734865 | -4.581099533 |
| 1420807_a_at | -0.14935678  | 6.85064131  | -1.577220619 | 0.147750861 | 0.147750861 | -4.581181026 |
| 1458716_at   | -0.162268323 | 4.414569378 | -1.57717916  | 0.147760363 | 0.147760363 | -4.581229431 |
| 1436304_at   | -0.118673892 | 6.282510892 | -1.577140071 | 0.147769322 | 0.147769322 | -4.581275069 |

|              |              |             |              |             |             |              |
|--------------|--------------|-------------|--------------|-------------|-------------|--------------|
| 1422845_at   | -0.151923823 | 9.937988772 | -1.577095896 | 0.147779447 | 0.147779447 | -4.581326644 |
| 1422148_at   | -0.214989704 | 4.78976803  | -1.577065184 | 0.147786488 | 0.147786488 | -4.581362501 |
| 1425799_at   | -0.119867277 | 4.373760328 | -1.577005077 | 0.147800267 | 0.147800267 | -4.581432675 |
| 1457603_at   | -0.134167362 | 4.426506792 | -1.576880144 | 0.14782891  | 0.14782891  | -4.581578529 |
| 1434932_at   | -0.197800587 | 6.255605572 | -1.576745054 | 0.147859888 | 0.147859888 | -4.581736233 |
| 1455907_x_at | 0.81989695   | 6.432727585 | 1.576728707  | 0.147863637 | 0.147863637 | -4.581755316 |
| 1436578_at   | 0.111161536  | 3.906232651 | 1.576716389  | 0.147866462 | 0.147866462 | -4.581769696 |
| 1456754_at   | 0.165259681  | 7.650701098 | 1.576670704  | 0.14787694  | 0.14787694  | -4.581823027 |
| 1425160_at   | -0.175137482 | 3.911982616 | -1.576488236 | 0.147918796 | 0.147918796 | -4.582036025 |
| 1425966_x_at | -0.293950631 | 11.10261283 | -1.576478893 | 0.147920939 | 0.147920939 | -4.58204693  |
| 1454307_at   | 0.1251878    | 4.844482061 | 1.576391334  | 0.147941028 | 0.147941028 | -4.582149135 |
| 1434729_at   | 0.12206272   | 8.175681599 | 1.576380615  | 0.147943487 | 0.147943487 | -4.582161647 |
| 1430762_at   | -0.806440337 | 5.609446115 | -1.576275948 | 0.147967505 | 0.147967505 | -4.582283815 |
| 1417353_x_at | 0.158194704  | 10.19185574 | 1.576136965  | 0.147999402 | 0.147999402 | -4.582446033 |
| 1453408_s_at | -0.108849086 | 3.681869852 | -1.57612913  | 0.1480012   | 0.1480012   | -4.582455177 |
| 1456078_x_at | -0.168161796 | 4.044661485 | -1.576113551 | 0.148004776 | 0.148004776 | -4.58247336  |
| 1436087_at   | 0.309967862  | 4.668703198 | 1.575989365  | 0.148033284 | 0.148033284 | -4.5826183   |
| 1432631_at   | -0.096896263 | 6.42340339  | -1.575747522 | 0.148088814 | 0.148088814 | -4.582900541 |
| 1433203_at   | 0.290909673  | 6.601994782 | 1.575717827  | 0.148095633 | 0.148095633 | -4.582935194 |
| 1426200_at   | 0.144357353  | 4.199376799 | 1.575690377  | 0.148101937 | 0.148101937 | -4.582967228 |
| 1455072_at   | -0.102858772 | 9.780788587 | -1.57562666  | 0.148116572 | 0.148116572 | -4.583041583 |
| 1458299_s_at | 0.154626736  | 4.94023713  | 1.575389712  | 0.148171005 | 0.148171005 | -4.583318079 |
| 1455027_at   | 0.309837969  | 6.109823124 | 1.575330427  | 0.148184627 | 0.148184627 | -4.583387256 |
| 1447897_x_at | 0.126691685  | 6.856988095 | 1.575020767  | 0.148255797 | 0.148255797 | -4.58374856  |
| 1459490_at   | -0.141831746 | 5.476671701 | -1.574971818 | 0.148267049 | 0.148267049 | -4.583805669 |
| 1417710_at   | 0.099935683  | 11.12716368 | 1.57496976   | 0.148267522 | 0.148267522 | -4.58380807  |
| 1437281_x_at | -0.124716424 | 8.16065231  | -1.574786191 | 0.14830973  | 0.14830973  | -4.584022234 |
| 1429502_at   | 0.167558536  | 8.144007512 | 1.574610481  | 0.14835014  | 0.14835014  | -4.584227216 |
| 1424075_at   | 0.124793851  | 8.491988385 | 1.574559648  | 0.148361832 | 0.148361832 | -4.584286514 |
| 1431790_at   | -0.122282799 | 3.506026188 | -1.574424109 | 0.148393013 | 0.148393013 | -4.584444623 |
| 1430563_at   | 0.132326262  | 4.356434135 | 1.574323624  | 0.148416133 | 0.148416133 | -4.584561836 |
| 1417839_at   | 0.118881861  | 8.315257109 | 1.574297442  | 0.148422158 | 0.148422158 | -4.584592376 |
| 1424731_at   | -0.144959094 | 6.961900743 | -1.574256728 | 0.148431526 | 0.148431526 | -4.584639865 |
| 1456713_at   | -0.135836748 | 4.685541825 | -1.574026281 | 0.148484566 | 0.148484566 | -4.584908655 |
| 1439499_at   | 0.141244313  | 5.25843859  | 1.573678506  | 0.148564641 | 0.148564641 | -4.585314254 |
| 1447495_at   | -0.121213179 | 3.470483072 | -1.573669109 | 0.148566805 | 0.148566805 | -4.585325212 |
| 1427375_at   | -0.108997402 | 7.291079202 | -1.573650813 | 0.148571019 | 0.148571019 | -4.585346549 |
| 1435306_a_at | 0.111909415  | 8.390477757 | 1.573610604  | 0.14858028  | 0.14858028  | -4.58539344  |
| 1441232_at   | 0.121022825  | 5.132759974 | 1.573596271  | 0.148583582 | 0.148583582 | -4.585410155 |
| 1456626_a_at | -0.114576871 | 9.065310578 | -1.573555089 | 0.148593067 | 0.148593067 | -4.585458179 |
| 1444525_at   | 0.196682486  | 3.751829031 | 1.573493472  | 0.148607261 | 0.148607261 | -4.585530034 |
| 1437620_x_at | -0.136069094 | 4.524544022 | -1.573438542 | 0.148619916 | 0.148619916 | -4.585594089 |
| 1425677_a_at | -0.346817202 | 5.179755974 | -1.573336278 | 0.148643477 | 0.148643477 | -4.585713338 |
| 1459263_at   | -0.11319927  | 3.623961068 | -1.573239319 | 0.148665819 | 0.148665819 | -4.585826397 |
| 1417867_at   | -0.173107325 | 4.484959279 | -1.573193296 | 0.148676425 | 0.148676425 | -4.585880061 |
| 1437660_at   | -0.127042398 | 9.073170729 | -1.573159438 | 0.148684229 | 0.148684229 | -4.58591954  |
| 1443330_at   | 0.123855016  | 6.478009208 | 1.573117531  | 0.148693887 | 0.148693887 | -4.585968404 |
| 1440799_s_at | -0.193128989 | 6.57646875  | -1.573082578 | 0.148701943 | 0.148701943 | -4.586009158 |
| 1426341_at   | -0.385687513 | 7.801455516 | -1.572874973 | 0.148749802 | 0.148749802 | -4.586251211 |
| 1427170_at   | -0.183511603 | 4.792982075 | -1.572840095 | 0.148757844 | 0.148757844 | -4.586291875 |
| 1443945_at   | 0.128834663  | 3.749194143 | 1.572810555  | 0.148764655 | 0.148764655 | -4.586326315 |
| 1435577_at   | 0.135309337  | 5.124398046 | 1.572741927  | 0.14878048  | 0.14878048  | -4.586406325 |
| 1447912_x_at | 0.174568255  | 6.962783296 | 1.572539779  | 0.148827103 | 0.148827103 | -4.58664199  |

|              |              |             |              |             |             |              |
|--------------|--------------|-------------|--------------|-------------|-------------|--------------|
| 1425447_at   | 0.199834319  | 3.867349713 | 1.572479616  | 0.148840981 | 0.148840981 | -4.586712125 |
| 1428894_at   | 0.137528428  | 7.38229065  | 1.572319735  | 0.148877867 | 0.148877867 | -4.5868985   |
| 1440150_at   | -0.125453399 | 4.375560776 | -1.572269572 | 0.148889442 | 0.148889442 | -4.586956973 |
| 1444626_at   | -0.190314661 | 4.487145545 | -1.572252266 | 0.148893436 | 0.148893436 | -4.586977146 |
| 1425855_a_at | 0.12932927   | 7.864097655 | 1.571972945  | 0.148957904 | 0.148957904 | -4.587302722 |
| 1443079_at   | -0.122242181 | 3.639693129 | -1.571851768 | 0.14898588  | 0.14898588  | -4.587443957 |
| 1440089_at   | 0.133664143  | 4.558746005 | 1.571848766  | 0.148986573 | 0.148986573 | -4.587447456 |
| 1444135_at   | 0.117621251  | 5.962303325 | 1.571683011  | 0.149024848 | 0.149024848 | -4.587640637 |
| 1447415_at   | 0.304155097  | 5.024522711 | 1.571527153  | 0.149060846 | 0.149060846 | -4.587822274 |
| 1444496_at   | 0.153512625  | 3.765492495 | 1.571510463  | 0.149064701 | 0.149064701 | -4.587841724 |
| 1418473_at   | 0.17308294   | 6.165580531 | 1.571461874  | 0.149075925 | 0.149075925 | -4.587898348 |
| 1427510_at   | 0.139399086  | 6.66175707  | 1.571100832  | 0.14915935  | 0.14915935  | -4.588319063 |
| 1418798_s_at | -0.191172559 | 6.19523142  | -1.570815606 | 0.149225286 | 0.149225286 | -4.588651395 |
| 1453098_at   | 0.125026961  | 5.761921607 | 1.570624199  | 0.149269548 | 0.149269548 | -4.588874396 |
| 1445129_at   | 0.132177547  | 4.442513343 | 1.57057661   | 0.149280555 | 0.149280555 | -4.588929837 |
| 1440136_at   | -0.170094972 | 5.106124337 | -1.570544585 | 0.149287962 | 0.149287962 | -4.588967147 |
| 1440512_at   | 0.127623248  | 4.737858282 | 1.570492668  | 0.149299971 | 0.149299971 | -4.589027629 |
| 1442370_at   | 0.105117039  | 3.385999473 | 1.57033473   | 0.149336509 | 0.149336509 | -4.589211618 |
| 1449448_at   | -0.104315679 | 7.967296249 | -1.57016478  | 0.149375835 | 0.149375835 | -4.58940959  |
| 1436135_at   | 0.1474864    | 4.724431411 | 1.570117946  | 0.149386674 | 0.149386674 | -4.589464144 |
| 1433644_at   | -0.1067552   | 6.975033055 | -1.570085798 | 0.149394114 | 0.149394114 | -4.58950159  |
| 1419965_at   | -0.140363941 | 4.193694189 | -1.569965703 | 0.149421912 | 0.149421912 | -4.589641476 |
| 1416740_at   | -0.128589673 | 11.41272737 | -1.569800264 | 0.149460213 | 0.149460213 | -4.589834169 |
| 1441435_at   | 0.124207279  | 7.987382306 | 1.569797644  | 0.14946082  | 0.14946082  | -4.589837221 |
| 1438069_a_at | 0.298497999  | 8.529384634 | 1.569684498  | 0.14948702  | 0.14948702  | -4.589969001 |
| 1427148_at   | -0.127872539 | 7.267717653 | -1.569676002 | 0.149488987 | 0.149488987 | -4.589978896 |
| 1440708_at   | 0.098690326  | 6.140721956 | 1.569575532  | 0.149512256 | 0.149512256 | -4.590095907 |
| 1440803_x_at | -0.106942127 | 3.654002211 | -1.569404452 | 0.149551884 | 0.149551884 | -4.590295144 |
| 1439496_at   | 0.124272053  | 9.35328841  | 1.569389082  | 0.149555445 | 0.149555445 | -4.590313044 |
| 1417990_at   | -0.121086772 | 3.942161009 | -1.56922049  | 0.149594507 | 0.149594507 | -4.590509371 |
| 1429453_a_at | -0.108664748 | 8.191755101 | -1.569205562 | 0.149597966 | 0.149597966 | -4.590526755 |
| 1454660_at   | -0.186091817 | 4.580208913 | -1.569092195 | 0.149624239 | 0.149624239 | -4.590658765 |
| 1447806_s_at | -0.563408048 | 6.766514281 | -1.568969962 | 0.149652571 | 0.149652571 | -4.590801095 |
| 1427623_at   | -0.142336217 | 4.165142817 | -1.568739548 | 0.14970599  | 0.14970599  | -4.591069375 |
| 1458915_at   | -0.109486696 | 4.515009931 | -1.568630158 | 0.149731357 | 0.149731357 | -4.591196735 |
| 1435292_at   | -0.205757261 | 7.336974087 | -1.568439992 | 0.149775465 | 0.149775465 | -4.59141813  |
| 1441465_at   | -0.109780476 | 7.905485322 | -1.568349091 | 0.149796552 | 0.149796552 | -4.591523953 |
| 1459511_at   | -0.108880505 | 5.016937201 | -1.568177275 | 0.149836419 | 0.149836419 | -4.591723967 |
| 1426690_a_at | 0.12847308   | 8.994823323 | 1.568133266  | 0.149846632 | 0.149846632 | -4.591775196 |
| 1433820_a_at | 0.149751533  | 8.167365124 | 1.568095421  | 0.149855414 | 0.149855414 | -4.591819249 |
| 1455347_at   | -0.161062735 | 7.407200713 | -1.567929374 | 0.149893956 | 0.149893956 | -4.592012531 |
| 1440474_at   | 0.156295484  | 5.222774659 | 1.567833595  | 0.149916191 | 0.149916191 | -4.592124014 |
| 1442831_at   | -0.131894642 | 3.649771499 | -1.567804357 | 0.149922979 | 0.149922979 | -4.592158045 |
| 1423161_s_at | 0.165561875  | 8.771486314 | 1.56756218   | 0.149979216 | 0.149979216 | -4.592439912 |
| 1457566_at   | 0.114139643  | 6.659803215 | 1.567548636  | 0.149982362 | 0.149982362 | -4.592455675 |
| 1436792_at   | -0.12955732  | 4.736954015 | -1.56741915  | 0.150012439 | 0.150012439 | -4.592606372 |
| 1421896_at   | -0.152127878 | 5.450883969 | -1.567382356 | 0.150020986 | 0.150020986 | -4.592649192 |
| 1423983_at   | 0.2053258    | 4.819348167 | 1.567174016  | 0.150069392 | 0.150069392 | -4.592891643 |
| 1417992_a_at | -0.129125305 | 3.219057027 | -1.566821282 | 0.15015138  | 0.15015138  | -4.593302092 |
| 1429429_s_at | 0.111874503  | 8.141079439 | 1.566761043  | 0.150165385 | 0.150165385 | -4.593372183 |
| 1445727_at   | 0.227086732  | 5.988828036 | 1.566622267  | 0.150197655 | 0.150197655 | -4.593533649 |
| 1427854_x_at | 0.120623132  | 5.162905479 | 1.566595024  | 0.150203991 | 0.150203991 | -4.593565346 |
| 1428489_at   | 0.150570707  | 10.51276883 | 1.56651728   | 0.150222072 | 0.150222072 | -4.593655797 |



|              |              |             |              |             |             |              |
|--------------|--------------|-------------|--------------|-------------|-------------|--------------|
| 1424624_at   | 0.152280385  | 6.08056131  | 1.566386061  | 0.150252594 | 0.150252594 | -4.593808459 |
| 1418591_at   | -0.190119191 | 7.006708999 | -1.566371521 | 0.150255977 | 0.150255977 | -4.593825375 |
| 1459860_x_at | 0.244202979  | 9.339820333 | 1.566300338  | 0.150272537 | 0.150272537 | -4.593908186 |
| 1442451_at   | 0.130712186  | 4.324148158 | 1.566163735  | 0.150304322 | 0.150304322 | -4.594067099 |
| 1425575_at   | 0.182591383  | 10.09174219 | 1.566159039  | 0.150305415 | 0.150305415 | -4.594072563 |
| 1422034_a_at | -0.221464476 | 6.406299966 | -1.566149876 | 0.150307547 | 0.150307547 | -4.594083222 |
| 1449283_a_at | -0.123924211 | 6.627001684 | -1.566073396 | 0.150325345 | 0.150325345 | -4.594172188 |
| 1441700_at   | -0.152830141 | 5.079439945 | -1.565887923 | 0.150368515 | 0.150368515 | -4.594387936 |
| 1420912_at   | 0.139286715  | 7.121195095 | 1.565569604  | 0.150442632 | 0.150442632 | -4.594758182 |
| 1432099_a_at | 0.14602823   | 4.155029269 | 1.565480393  | 0.15046341  | 0.15046341  | -4.594861939 |
| 1443965_at   | -0.134989988 | 3.929997906 | -1.565451474 | 0.150470146 | 0.150470146 | -4.594895572 |
| 1459778_at   | -0.117877272 | 4.737293942 | -1.565384948 | 0.150485642 | 0.150485642 | -4.594972943 |
| 1418290_a_at | 0.135870938  | 5.305252778 | 1.565199562  | 0.150528833 | 0.150528833 | -4.595188539 |
| 1421767_at   | 0.108803077  | 4.953892717 | 1.565054467  | 0.150562645 | 0.150562645 | -4.595357269 |
| 1419762_at   | -0.095274083 | 3.584019519 | -1.564884516 | 0.150602258 | 0.150602258 | -4.595554895 |
| 1444811_at   | 0.238410146  | 7.174542927 | 1.564800227  | 0.150621908 | 0.150621908 | -4.595652905 |
| 1456181_at   | -0.136336765 | 6.171006314 | -1.564500073 | 0.150691899 | 0.150691899 | -4.596001896 |
| 1458096_at   | -0.150522991 | 6.907404867 | -1.564292986 | 0.150740205 | 0.150740205 | -4.596242657 |
| 1426234_s_at | 0.11129127   | 9.768697914 | 1.563912856  | 0.150828912 | 0.150828912 | -4.596684558 |
| 1457122_at   | 0.14716952   | 3.561081254 | 1.563883672  | 0.150835724 | 0.150835724 | -4.596718482 |
| 1422142_at   | -0.106983863 | 5.418387425 | -1.563746594 | 0.150867725 | 0.150867725 | -4.596877818 |
| 1444320_at   | 0.209782266  | 5.649841838 | 1.563681015  | 0.150883037 | 0.150883037 | -4.596954045 |
| 1453901_at   | 0.100729102  | 3.082909162 | 1.563426342  | 0.150942512 | 0.150942512 | -4.597250046 |
| 1454042_a_at | -0.119995493 | 8.288236677 | -1.563422786 | 0.150943343 | 0.150943343 | -4.597254179 |
| 1441601_at   | 0.135331606  | 3.89500503  | 1.56340939   | 0.150946472 | 0.150946472 | -4.597269748 |
| 1453195_at   | 0.124058174  | 8.368089758 | 1.563360667  | 0.150957853 | 0.150957853 | -4.597326375 |
| 1450107_a_at | -0.121404774 | 7.684072106 | -1.563311832 | 0.150969261 | 0.150969261 | -4.597383131 |
| 1444835_at   | 0.126210044  | 3.422468982 | 1.563188439  | 0.15099809  | 0.15099809  | -4.597526535 |
| 1436013_at   | -0.179896049 | 6.237389917 | -1.563076666 | 0.151024208 | 0.151024208 | -4.597656427 |
| 1448551_a_at | 0.129636662  | 8.032128756 | 1.56302395   | 0.151036528 | 0.151036528 | -4.597717688 |
| 1453329_s_at | 0.128923264  | 4.184642981 | 1.562893287  | 0.151067067 | 0.151067067 | -4.597869525 |
| 1447392_s_at | 0.16185911   | 4.643381159 | 1.562837689  | 0.151080063 | 0.151080063 | -4.597934131 |
| 1435282_at   | -0.147934462 | 6.47128775  | -1.562610186 | 0.151133254 | 0.151133254 | -4.59819848  |
| 1432570_at   | -0.139311747 | 3.788790305 | -1.562547698 | 0.151147867 | 0.151147867 | -4.598271085 |
| 1436996_x_at | 0.282813505  | 9.08915318  | 1.562545732  | 0.151148327 | 0.151148327 | -4.598273369 |
| 1450526_at   | -0.122700644 | 5.02024564  | -1.562376537 | 0.151187899 | 0.151187899 | -4.59846995  |
| 1444182_at   | -0.14692403  | 4.534884408 | -1.562316916 | 0.151201846 | 0.151201846 | -4.598539218 |
| 1452814_at   | 0.15215251   | 7.886161576 | 1.562264856  | 0.151214025 | 0.151214025 | -4.598599701 |
| 1449925_at   | 0.142322101  | 5.109235947 | 1.562081281  | 0.151256977 | 0.151256977 | -4.598812968 |
| 1415805_at   | -0.110125147 | 4.075519467 | -1.562046635 | 0.151265085 | 0.151265085 | -4.598853217 |
| 1418696_at   | 0.117116201  | 4.791414358 | 1.561988407  | 0.151278712 | 0.151278712 | -4.598920859 |
| 1438169_a_at | -0.181836933 | 8.67070282  | -1.56179204  | 0.151324675 | 0.151324675 | -4.599148966 |
| 1452420_at   | -0.099861657 | 4.810308463 | -1.561751152 | 0.151334248 | 0.151334248 | -4.599196461 |
| 1445902_at   | 0.167899115  | 4.900052399 | 1.561618661  | 0.151365268 | 0.151365268 | -4.599350355 |
| 1452023_at   | -0.134984759 | 5.245664046 | -1.561601191 | 0.151369359 | 0.151369359 | -4.599370648 |
| 1432156_a_at | -0.207536423 | 6.868322741 | -1.561419295 | 0.151411958 | 0.151411958 | -4.599581918 |
| 1454105_at   | -0.166257122 | 3.625636349 | -1.56136535  | 0.151424593 | 0.151424593 | -4.599644571 |
| 1415765_at   | 0.123401261  | 8.901901005 | 1.561297594  | 0.151440465 | 0.151440465 | -4.599723265 |
| 1417356_at   | -0.193090582 | 10.75616396 | -1.561139879 | 0.151477415 | 0.151477415 | -4.59990643  |
| 1423226_at   | 0.178406209  | 3.989597375 | 1.561089417  | 0.15148924  | 0.15148924  | -4.599965033 |
| 1441215_at   | -0.160822911 | 5.179165356 | -1.561055247 | 0.151497247 | 0.151497247 | -4.600004715 |
| 1446436_at   | -0.138420136 | 4.207361384 | -1.560932987 | 0.151525899 | 0.151525899 | -4.600146693 |
| 1453086_at   | -0.122848394 | 6.033575781 | -1.560321715 | 0.151669228 | 0.151669228 | -4.600856467 |

|              |              |             |              |             |             |              |
|--------------|--------------|-------------|--------------|-------------|-------------|--------------|
| 1438341_at   | -0.15050845  | 4.592802461 | -1.560258693 | 0.151684011 | 0.151684011 | -4.600929636 |
| 1429713_at   | -0.115727334 | 7.151797074 | -1.560193477 | 0.151699311 | 0.151699311 | -4.60100535  |
| 1432535_at   | 0.096316232  | 3.593138718 | 1.560108723  | 0.151719197 | 0.151719197 | -4.601103746 |
| 1431134_at   | -0.114682649 | 5.874065207 | -1.559864797 | 0.151776442 | 0.151776442 | -4.601386918 |
| 1445163_at   | 0.149223036  | 3.319150446 | 1.559826563  | 0.151785417 | 0.151785417 | -4.601431301 |
| 1436254_at   | -0.118829497 | 5.647124162 | -1.559701043 | 0.151814883 | 0.151814883 | -4.601577005 |
| 1430529_at   | -0.142661604 | 7.768028755 | -1.559698128 | 0.151815567 | 0.151815567 | -4.601580388 |
| 1457405_at   | -0.137238082 | 4.100807383 | -1.55963445  | 0.151830518 | 0.151830518 | -4.601654304 |
| 1433178_at   | -0.14912648  | 5.573851464 | -1.559360145 | 0.151894935 | 0.151894935 | -4.601972689 |
| 1441910_x_at | -0.122041309 | 8.972258857 | -1.55935386  | 0.151896412 | 0.151896412 | -4.601979984 |
| 1436125_at   | 0.113231247  | 8.435810074 | 1.559178726  | 0.151937553 | 0.151937553 | -4.602183245 |
| 1440188_at   | 0.109499753  | 3.436521687 | 1.559057179  | 0.151966112 | 0.151966112 | -4.602324307 |
| 1422669_at   | 0.107460047  | 8.66820259  | 1.558913856  | 0.151999793 | 0.151999793 | -4.602490633 |
| 1431687_at   | -0.122750073 | 3.975165881 | -1.558625927 | 0.152067477 | 0.152067477 | -4.602824749 |
| 1429619_a_at | 0.098919893  | 6.674192817 | 1.558582681  | 0.152077646 | 0.152077646 | -4.60287493  |
| 1433195_at   | 0.18048754   | 4.452730101 | 1.558378358  | 0.152125696 | 0.152125696 | -4.603112006 |
| 1456682_at   | -0.138871954 | 3.948389784 | -1.558250945 | 0.152155666 | 0.152155666 | -4.603259835 |
| 1456262_at   | 0.267217631  | 9.622672361 | 1.558234663  | 0.152159496 | 0.152159496 | -4.603278725 |
| 1436417_at   | 0.110009991  | 4.883752421 | 1.558015405  | 0.152211083 | 0.152211083 | -4.6035331   |
| 1443974_at   | 0.113896761  | 4.9711122   | 1.557871387  | 0.152244976 | 0.152244976 | -4.603700174 |
| 1420497_a_at | 0.124245228  | 8.822618885 | 1.557802184  | 0.152261265 | 0.152261265 | -4.603780453 |
| 1434339_at   | 0.116620869  | 10.50079079 | 1.557761285  | 0.152270892 | 0.152270892 | -4.603827897 |
| 1441770_at   | -0.126480972 | 3.666023937 | -1.557606433 | 0.152307348 | 0.152307348 | -4.604007523 |
| 1440712_at   | 0.162150336  | 5.891558949 | 1.55757117   | 0.152315651 | 0.152315651 | -4.604048427 |
| 1459603_at   | 0.140449613  | 5.044602679 | 1.557543524  | 0.15232216  | 0.15232216  | -4.604080493 |
| 1457739_at   | -0.135174359 | 5.526944253 | -1.557485186 | 0.152335898 | 0.152335898 | -4.604148161 |
| 1437439_at   | 0.190098455  | 7.659419364 | 1.557452951  | 0.152343489 | 0.152343489 | -4.604185551 |
| 1434979_at   | 0.123062155  | 7.719398931 | 1.557313949  | 0.152376227 | 0.152376227 | -4.604346776 |
| 1418316_a_at | 0.104704835  | 9.583294712 | 1.55720756   | 0.152401288 | 0.152401288 | -4.604470168 |
| 1416484_at   | 0.13712895   | 10.65241578 | 1.55683681   | 0.15248865  | 0.15248865  | -4.604900137 |
| 1434536_at   | -0.250214227 | 4.983254244 | -1.556834412 | 0.152489215 | 0.152489215 | -4.604902918 |
| 1420522_at   | -0.165046805 | 7.519115407 | -1.556785021 | 0.152500857 | 0.152500857 | -4.604960193 |
| 1445771_at   | -0.096347584 | 3.229540862 | -1.556667299 | 0.152528608 | 0.152528608 | -4.605096705 |
| 1430581_at   | -0.167809217 | 3.394374771 | -1.556666261 | 0.152528852 | 0.152528852 | -4.605097909 |
| 1459503_at   | -0.103794921 | 5.698533096 | -1.556545461 | 0.152557334 | 0.152557334 | -4.605237985 |
| 1451852_at   | -0.127696314 | 3.397955143 | -1.55639939  | 0.152591779 | 0.152591779 | -4.605407356 |
| 1435904_at   | -0.111903452 | 6.575960139 | -1.556300598 | 0.15261508  | 0.15261508  | -4.6055219   |
| 1428741_at   | 0.488554625  | 6.502987767 | 1.556236037  | 0.152630308 | 0.152630308 | -4.605596755 |
| 1444910_at   | -0.135897866 | 4.426970778 | -1.55612858  | 0.152655658 | 0.152655658 | -4.60572134  |
| 1440198_at   | -0.154415903 | 3.662989737 | -1.556093552 | 0.152663923 | 0.152663923 | -4.605761951 |
| 1417153_at   | -0.237618556 | 4.819765304 | -1.555986543 | 0.152689172 | 0.152689172 | -4.605886011 |
| 1446789_at   | 0.094422341  | 3.96622512  | 1.555933964  | 0.152701579 | 0.152701579 | -4.605946966 |
| 1443000_at   | 0.137796702  | 6.206595736 | 1.555824588  | 0.152727393 | 0.152727393 | -4.606073764 |
| 1449661_at   | 0.211285405  | 3.98590915  | 1.555800658  | 0.152733041 | 0.152733041 | -4.606101504 |
| 1428174_x_at | -0.194182393 | 8.040265155 | -1.555768781 | 0.152740565 | 0.152740565 | -4.606138458 |
| 1439510_at   | 0.135942127  | 7.435964707 | 1.555713092  | 0.15275371  | 0.15275371  | -4.606203014 |
| 1435865_at   | -0.215329096 | 8.604006546 | -1.555647728 | 0.152769141 | 0.152769141 | -4.606278784 |
| 1442509_at   | 0.106958247  | 6.582809087 | 1.555594227  | 0.152781772 | 0.152781772 | -4.606340801 |
| 1457855_at   | -0.129345105 | 3.821070745 | -1.555528785 | 0.152797223 | 0.152797223 | -4.606416658 |
| 1451455_at   | -0.115592876 | 5.254878867 | -1.555494318 | 0.152805362 | 0.152805362 | -4.60645661  |
| 1457668_x_at | 0.10993556   | 3.596213299 | 1.555199529  | 0.152874984 | 0.152874984 | -4.606798291 |
| 1434977_at   | 0.127902767  | 7.068735377 | 1.555122737  | 0.152893126 | 0.152893126 | -4.606887293 |
| 1439784_at   | -0.13920578  | 7.481397189 | -1.554998086 | 0.152922577 | 0.152922577 | -4.607031758 |

|              |              |             |              |             |             |              |
|--------------|--------------|-------------|--------------|-------------|-------------|--------------|
| 1434860_at   | 0.12873966   | 8.565963954 | 1.554912143  | 0.152942886 | 0.152942886 | -4.607131358 |
| 1445446_at   | -0.136254902 | 4.16974746  | -1.554551972 | 0.153028022 | 0.153028022 | -4.607548734 |
| 1441762_at   | 0.298129947  | 5.978475924 | 1.554504261  | 0.153039303 | 0.153039303 | -4.60760402  |
| 1431632_at   | -0.112681854 | 3.183477664 | -1.55447556  | 0.153046089 | 0.153046089 | -4.607637276 |
| 1444963_at   | -0.182935561 | 4.139813016 | -1.554451377 | 0.153051807 | 0.153051807 | -4.607665298 |
| 1429496_x_at | -0.221515184 | 4.599079649 | -1.554411671 | 0.153061197 | 0.153061197 | -4.607711305 |
| 1419837_at   | 0.129326307  | 3.554049933 | 1.554211077  | 0.15310864  | 0.15310864  | -4.607943726 |
| 1447689_at   | -0.106643374 | 4.531571879 | -1.554182237 | 0.153115462 | 0.153115462 | -4.60797714  |
| 1454519_at   | -0.189377825 | 3.702393032 | -1.55412764  | 0.153128378 | 0.153128378 | -4.608040396 |
| 1444016_at   | 0.268749638  | 4.758623361 | 1.553899111  | 0.15318245  | 0.15318245  | -4.608305157 |
| 1419379_x_at | -0.210176448 | 5.496421869 | -1.553860069 | 0.153191689 | 0.153191689 | -4.608350387 |
| 1449302_at   | 0.107737684  | 5.751811224 | 1.553834775  | 0.153197675 | 0.153197675 | -4.608379689 |
| 1445764_at   | -0.148485245 | 3.883477517 | -1.553698096 | 0.153230026 | 0.153230026 | -4.608538025 |
| 1425732_a_at | 0.141097185  | 7.734953795 | 1.553512458  | 0.153273974 | 0.153273974 | -4.608753064 |
| 1445243_at   | -0.147305049 | 4.640531348 | -1.553499628 | 0.153277012 | 0.153277012 | -4.608767926 |
| 1447845_s_at | -0.202473355 | 3.767970495 | -1.553346519 | 0.153313268 | 0.153313268 | -4.608945274 |
| 1433193_at   | 0.123408559  | 5.588226579 | 1.553304156  | 0.153323301 | 0.153323301 | -4.608994343 |
| 1456016_x_at | 0.181155724  | 4.109391188 | 1.553164578  | 0.153356361 | 0.153356361 | -4.609156007 |
| 1456417_at   | -0.129247665 | 4.072853488 | -1.553057966 | 0.153381618 | 0.153381618 | -4.609279483 |
| 1431635_at   | 0.137769623  | 3.791975969 | 1.553035588  | 0.15338692  | 0.15338692  | -4.609305401 |
| 1433948_at   | -0.160130284 | 3.340270352 | -1.553031544 | 0.153387878 | 0.153387878 | -4.609310084 |
| 1447352_at   | 0.148826523  | 3.473364771 | 1.552972988  | 0.153401752 | 0.153401752 | -4.609377901 |
| 1437441_at   | 0.172436957  | 5.23951851  | 1.552868754  | 0.153426452 | 0.153426452 | -4.609498615 |
| 1444053_at   | 0.187728813  | 3.829877184 | 1.552754777  | 0.153453464 | 0.153453464 | -4.609630609 |
| 1432497_at   | 0.128538054  | 3.614508749 | 1.55259688   | 0.153490892 | 0.153490892 | -4.609813456 |
| 1419467_at   | 0.161439166  | 7.618778704 | 1.552449102  | 0.153525929 | 0.153525929 | -4.609984577 |
| 1458238_at   | 0.372177661  | 6.317245324 | 1.552413956  | 0.153534263 | 0.153534263 | -4.610025273 |
| 1432729_at   | 0.095098846  | 3.611962062 | 1.552392655  | 0.153539314 | 0.153539314 | -4.610049937 |
| 1437724_x_at | 0.166350343  | 6.789507071 | 1.552259772  | 0.153570828 | 0.153570828 | -4.610203799 |
| 1447695_at   | -0.125213868 | 4.001182995 | -1.552258963 | 0.15357102  | 0.15357102  | -4.610204736 |
| 1421759_a_at | -0.136264977 | 4.26906595  | -1.552065724 | 0.153616858 | 0.153616858 | -4.610428471 |
| 1439626_at   | 0.15199902   | 4.148859079 | 1.551982451  | 0.153636615 | 0.153636615 | -4.610524881 |
| 1431201_at   | -0.188936914 | 5.663042067 | -1.551933245 | 0.15364829  | 0.15364829  | -4.610581849 |
| 1437536_at   | 0.280487105  | 6.134447114 | 1.55188809   | 0.153659005 | 0.153659005 | -4.610634125 |
| 1453694_at   | -0.133223448 | 4.125684936 | -1.551839301 | 0.153670583 | 0.153670583 | -4.610690607 |
| 1450779_at   | 0.424765413  | 7.586743891 | 1.551631503  | 0.153719903 | 0.153719903 | -4.610931164 |
| 1421024_at   | -0.173029014 | 6.340510147 | -1.55157258  | 0.153733891 | 0.153733891 | -4.610999372 |
| 1416782_s_at | -0.105875629 | 9.223498085 | -1.551524538 | 0.153745297 | 0.153745297 | -4.611054985 |
| 1442718_at   | -0.237333297 | 3.815030749 | -1.551258214 | 0.153808538 | 0.153808538 | -4.611363257 |
| 1455841_s_at | 0.109160151  | 7.673836049 | 1.55125054   | 0.15381036  | 0.15381036  | -4.611372139 |
| 1458694_at   | -0.212089116 | 4.48897993  | -1.551128087 | 0.153839446 | 0.153839446 | -4.61151387  |
| 1437733_at   | -0.193589922 | 6.746175891 | -1.551100509 | 0.153845997 | 0.153845997 | -4.611545789 |
| 1457793_a_at | 0.10813769   | 6.729563587 | 1.550855882  | 0.153904119 | 0.153904119 | -4.611828906 |
| 1438969_x_at | 0.177291244  | 9.51305478  | 1.550617729  | 0.153960721 | 0.153960721 | -4.612104509 |
| 1430386_at   | 0.137097493  | 7.560764579 | 1.550488153  | 0.153991525 | 0.153991525 | -4.612254452 |
| 1456150_at   | 0.159510639  | 8.098784132 | 1.550289193  | 0.154038835 | 0.154038835 | -4.612484671 |
| 1456203_at   | -0.127460312 | 3.221875038 | -1.550215703 | 0.154056313 | 0.154056313 | -4.612569703 |
| 1435074_at   | 0.09850795   | 10.17154864 | 1.549787629  | 0.154158156 | 0.154158156 | -4.613064967 |
| 1419623_at   | -0.112616748 | 4.341677753 | -1.549714552 | 0.154175548 | 0.154175548 | -4.613149506 |
| 1454367_at   | -0.125440078 | 6.134511817 | -1.549685503 | 0.154182461 | 0.154182461 | -4.613183111 |
| 1430296_at   | -0.129160212 | 3.70957611  | -1.549666745 | 0.154186926 | 0.154186926 | -4.613204811 |
| 1415685_at   | 0.165929933  | 8.937460926 | 1.549534758  | 0.154218345 | 0.154218345 | -4.613357494 |
| 1420973_at   | 0.287290259  | 7.545495799 | 1.549423035  | 0.154244943 | 0.154244943 | -4.613486729 |

|                    |              |             |              |             |             |              |
|--------------------|--------------|-------------|--------------|-------------|-------------|--------------|
| 1416156_at         | 0.134616172  | 10.54430304 | 1.549383194  | 0.15425443  | 0.15425443  | -4.613532815 |
| 1416811_s_at       | 0.161937591  | 6.830268761 | 1.549359608  | 0.154260046 | 0.154260046 | -4.613560097 |
| 1446057_at         | -0.098080858 | 7.948835996 | -1.549204724 | 0.154296931 | 0.154296931 | -4.613739247 |
| 1428941_at         | 0.139833019  | 7.486588986 | 1.549157937  | 0.154308074 | 0.154308074 | -4.613793362 |
| 1445199_at         | 0.116141521  | 5.285398714 | 1.549100418  | 0.154321775 | 0.154321775 | -4.613859889 |
| 1425910_at         | 0.114925569  | 3.438543158 | 1.549097985  | 0.154322355 | 0.154322355 | -4.613862703 |
| 1445692_x_at       | -0.138968738 | 5.567332927 | -1.548875839 | 0.154375279 | 0.154375279 | -4.614119628 |
| 1442559_at         | 0.123552588  | 3.145540806 | 1.548729341  | 0.154410189 | 0.154410189 | -4.61428905  |
| 1445367_at         | -0.139578179 | 4.347181222 | -1.548706295 | 0.154415682 | 0.154415682 | -4.614315702 |
| 1459667_at         | 0.115012311  | 7.422824356 | 1.548678355  | 0.154422341 | 0.154422341 | -4.614348012 |
| 1455427_at         | -0.119663082 | 5.002409446 | -1.548656458 | 0.15442756  | 0.15442756  | -4.614373335 |
| 1433965_at         | 0.151289178  | 7.378906307 | 1.548563945  | 0.154449611 | 0.154449611 | -4.614480318 |
| 1434733_at         | -0.151716196 | 6.508777058 | -1.548538197 | 0.154455749 | 0.154455749 | -4.614510092 |
| 1439419_at         | 0.120157243  | 5.308019553 | 1.548531175  | 0.154457423 | 0.154457423 | -4.614518213 |
| 1459872_x_at       | -0.179853717 | 3.979577636 | -1.548410091 | 0.154486291 | 0.154486291 | -4.614658228 |
| 1427429_at         | 0.112117067  | 4.480443436 | 1.548387995  | 0.154491559 | 0.154491559 | -4.614683778 |
| 1454015_a_at       | 0.189017782  | 4.143655733 | 1.548331833  | 0.154504951 | 0.154504951 | -4.614748719 |
| 1447255_at         | 0.163702884  | 4.108628333 | 1.548318762  | 0.154508067 | 0.154508067 | -4.614763832 |
| 1445949_at         | -0.14977006  | 5.095470564 | -1.548224437 | 0.154530561 | 0.154530561 | -4.614872898 |
| 1423238_at         | -0.484924345 | 6.437597547 | -1.548163466 | 0.154545103 | 0.154545103 | -4.614943396 |
| 1425091_at         | -0.148055957 | 3.905033504 | -1.547971796 | 0.154590824 | 0.154590824 | -4.615165002 |
| 1436649_at         | 0.160069551  | 3.979500003 | 1.547884219  | 0.154611718 | 0.154611718 | -4.615266254 |
| 1431032_at         | 0.192722287  | 7.578916744 | 1.547867352  | 0.154615743 | 0.154615743 | -4.615285754 |
| 1429329_at         | -0.163801876 | 6.815237999 | -1.547833531 | 0.154623813 | 0.154623813 | -4.615324854 |
| 1434293_at         | 0.136190387  | 6.296739125 | 1.547797275  | 0.154632464 | 0.154632464 | -4.615366769 |
| 1418854_at         | -0.111221765 | 8.965003062 | -1.547777779 | 0.154637116 | 0.154637116 | -4.615389308 |
| 1433346_at         | 0.131001078  | 3.656356964 | 1.54766466   | 0.154664113 | 0.154664113 | -4.61552008  |
| 1458871_at         | 0.138505726  | 3.1682719   | 1.547486441  | 0.154706653 | 0.154706653 | -4.6157261   |
| 1452491_at         | -0.168146132 | 4.188938829 | -1.547367451 | 0.154735062 | 0.154735062 | -4.615863645 |
| 1444126_at         | 0.19495552   | 6.231213583 | 1.547221192  | 0.154769987 | 0.154769987 | -4.616032704 |
| 1459124_at         | 0.189336811  | 6.618604177 | 1.547220014  | 0.154770269 | 0.154770269 | -4.616034065 |
| 1455002_at         | 0.103605363  | 9.547305863 | 1.547217064  | 0.154770973 | 0.154770973 | -4.616037475 |
| 1423567_a_at       | 0.116103092  | 10.51870815 | 1.546956585  | 0.154833191 | 0.154833191 | -4.616338537 |
| 1429481_at         | 0.112029624  | 3.434158386 | 1.546731605  | 0.154886947 | 0.154886947 | -4.616598548 |
| 1436519_a_at       | 0.121630416  | 8.776343377 | 1.546697901  | 0.154895002 | 0.154895002 | -4.616637498 |
| 1432764_at         | -0.117278589 | 3.556237971 | -1.546680449 | 0.154899173 | 0.154899173 | -4.616657666 |
| 1441515_at         | 0.173552368  | 4.116225524 | 1.546645155  | 0.154907608 | 0.154907608 | -4.616698453 |
| 1460732_a_at       | 0.151576625  | 7.200535342 | 1.546579498  | 0.1549233   | 0.1549233   | -4.616774327 |
| 1433892_at         | -0.126818613 | 6.973254264 | -1.546351692 | 0.15497776  | 0.15497776  | -4.61703757  |
| 1435722_at         | -0.176158681 | 6.634027521 | -1.546314638 | 0.15498662  | 0.15498662  | -4.617080386 |
| 1441091_at         | 0.14068816   | 3.425033039 | 1.546083685  | 0.155041852 | 0.155041852 | -4.61734724  |
| 1436754_at         | 0.166780771  | 5.068227352 | 1.546080945  | 0.155042507 | 0.155042507 | -4.617350406 |
| 1438733_at         | -0.119797609 | 4.122826675 | -1.546035572 | 0.15505336  | 0.15505336  | -4.617402829 |
| 1421252_a_at       | -0.136947619 | 7.46693988  | -1.545891015 | 0.155087942 | 0.155087942 | -4.617569844 |
| 1456718_at         | 0.110916468  | 3.134530159 | 1.54583756   | 0.155100731 | 0.155100731 | -4.617631601 |
| 1425841_at         | -0.134666793 | 5.595988285 | -1.54571668  | 0.155129656 | 0.155129656 | -4.617771251 |
| 1439817_at         | 0.135613811  | 5.748688271 | 1.545703146  | 0.155132895 | 0.155132895 | -4.617786887 |
| 1427857_x_at       | 0.0993519    | 3.492027742 | 1.545573071  | 0.155164026 | 0.155164026 | -4.617937152 |
| 1441854_at         | 0.154011821  | 3.394383702 | 1.545551426  | 0.155169207 | 0.155169207 | -4.617962157 |
| 1453555_at         | 0.294080609  | 6.017525924 | 1.545437706  | 0.155196429 | 0.155196429 | -4.618093523 |
| 1422587_at         | -0.118065802 | 8.902479237 | -1.545375211 | 0.155211391 | 0.155211391 | -4.618165713 |
| 1429926_at         | 0.124708525  | 5.626988676 | 1.545204412  | 0.155252288 | 0.155252288 | -4.618363    |
| AFFX-TransRecMur/) | 0.171355898  | 3.981575373 | 1.545095018  | 0.155278487 | 0.155278487 | -4.618489354 |

|              |              |             |              |             |             |              |
|--------------|--------------|-------------|--------------|-------------|-------------|--------------|
| 1441510_at   | -0.158363019 | 5.113789205 | -1.545038995 | 0.155291905 | 0.155291905 | -4.61855406  |
| 1433377_at   | -0.124413842 | 5.838224914 | -1.544969979 | 0.155308437 | 0.155308437 | -4.618633771 |
| 1446617_at   | -0.154261804 | 4.027905857 | -1.544940873 | 0.15531541  | 0.15531541  | -4.618667388 |
| 1448996_at   | -0.166459395 | 5.348573947 | -1.544915885 | 0.155321396 | 0.155321396 | -4.618696248 |
| 1452637_a_at | -0.153334002 | 7.663849886 | -1.544797443 | 0.155349773 | 0.155349773 | -4.618833038 |
| 1441390_at   | 0.118183965  | 3.188112046 | 1.544758645  | 0.155359069 | 0.155359069 | -4.618877844 |
| 1417674_s_at | -0.146563827 | 9.16367108  | -1.544716702 | 0.15536912  | 0.15536912  | -4.618926283 |
| 1426117_a_at | -0.196583212 | 5.36731067  | -1.544699277 | 0.155373296 | 0.155373296 | -4.618946407 |
| 1425805_a_at | 0.142631873  | 6.620277461 | 1.54468525   | 0.155376657 | 0.155376657 | -4.618962606 |
| 1434834_at   | -0.104769085 | 8.761125901 | -1.544499184 | 0.155421252 | 0.155421252 | -4.619177476 |
| 1442715_at   | -0.11656386  | 3.719717623 | -1.544458292 | 0.155431054 | 0.155431054 | -4.619224697 |
| 1435420_at   | -0.119244593 | 3.473045621 | -1.54424295  | 0.155482683 | 0.155482683 | -4.619473355 |
| 1457332_at   | -0.167169121 | 5.455979813 | -1.543960128 | 0.155550513 | 0.155550513 | -4.619799905 |
| 1444331_at   | -0.164216983 | 3.94808644  | -1.543773367 | 0.155595319 | 0.155595319 | -4.620015524 |
| 1453283_at   | 0.107952748  | 8.393593034 | 1.543612047  | 0.15563403  | 0.15563403  | -4.620201759 |
| 1435343_at   | 0.160637409  | 7.827667861 | 1.543471191  | 0.155667838 | 0.155667838 | -4.620364362 |
| 1418128_at   | -0.113520316 | 8.851412199 | -1.543161587 | 0.15574217  | 0.15574217  | -4.620721738 |
| 1455909_at   | 0.116101904  | 3.278499305 | 1.543150989  | 0.155744715 | 0.155744715 | -4.620733397 |
| 1456043_at   | 0.137638197  | 8.56420863  | 1.543112931  | 0.155753855 | 0.155753855 | -4.620777897 |
| 1419314_at   | -0.225067995 | 5.462477749 | -1.543026015 | 0.15577473  | 0.15577473  | -4.620878217 |
| 1424507_at   | -0.125001463 | 4.188476056 | -1.54300541  | 0.155779679 | 0.155779679 | -4.620901998 |
| 1422411_s_at | 0.232444896  | 3.121062002 | 1.542931413  | 0.155797453 | 0.155797453 | -4.620987402 |
| 1435376_at   | 0.098600692  | 8.910771185 | 1.542762039  | 0.155838144 | 0.155838144 | -4.621182879 |
| 1460440_at   | -0.167766701 | 7.374012893 | -1.542458319 | 0.155911135 | 0.155911135 | -4.621533377 |
| 1446981_at   | -0.116805261 | 3.407660477 | -1.542409455 | 0.15592288  | 0.15592288  | -4.621589763 |
| 1426890_a_at | 0.143567064  | 7.322820368 | 1.542343044  | 0.155938845 | 0.155938845 | -4.621666396 |
| 1418846_at   | -0.172792783 | 7.261516323 | -1.542243825 | 0.1559627   | 0.1559627   | -4.621780884 |
| 1438217_at   | 0.173230124  | 5.011262313 | 1.542222029  | 0.155967941 | 0.155967941 | -4.621806034 |
| 1451454_at   | 0.195226734  | 4.346330013 | 1.542086993  | 0.156000413 | 0.156000413 | -4.621961844 |
| 1440999_at   | 0.156352456  | 6.323656826 | 1.54203867   | 0.156012035 | 0.156012035 | -4.622017599 |
| 1427426_at   | 0.113091242  | 3.848255672 | 1.542012139  | 0.156018416 | 0.156018416 | -4.622048209 |
| 1442668_at   | -0.121567338 | 3.945742032 | -1.541970333 | 0.156028471 | 0.156028471 | -4.622096443 |
| 1435419_at   | 0.177755335  | 5.882599221 | 1.541943471  | 0.156034932 | 0.156034932 | -4.622127436 |
| 1425286_at   | -0.128330492 | 3.79105147  | -1.541924897 | 0.1560394   | 0.1560394   | -4.622148866 |
| 1422469_at   | 0.153726693  | 8.500908862 | 1.541920067  | 0.156040562 | 0.156040562 | -4.622154438 |
| 1427626_at   | -0.100214362 | 5.607020421 | -1.541886005 | 0.156048755 | 0.156048755 | -4.622193736 |
| 1420939_at   | -0.114063294 | 3.73837556  | -1.541866414 | 0.156053468 | 0.156053468 | -4.622216339 |
| 1448678_at   | -0.185615319 | 8.405749894 | -1.541749879 | 0.156081505 | 0.156081505 | -4.622350785 |
| 1453429_at   | -0.136906929 | 5.191047502 | -1.541710644 | 0.156090945 | 0.156090945 | -4.622396049 |
| 1438456_at   | 0.109157363  | 7.850121326 | 1.54170884   | 0.156091379 | 0.156091379 | -4.62239813  |
| 1417428_at   | 0.305437268  | 7.128988333 | 1.54149999   | 0.156141639 | 0.156141639 | -4.622639063 |
| 1415986_at   | -0.129918996 | 8.776275266 | -1.541318914 | 0.156185227 | 0.156185227 | -4.622847941 |
| 1429917_at   | -0.160165919 | 4.582675583 | -1.541308999 | 0.156187614 | 0.156187614 | -4.622859378 |
| 1455493_at   | -0.160791578 | 7.656823315 | -1.541259555 | 0.156199517 | 0.156199517 | -4.62291641  |
| 1417304_at   | -0.109265381 | 6.912924537 | -1.540982174 | 0.156266313 | 0.156266313 | -4.623236347 |
| 1420733_at   | 0.114558356  | 3.296569741 | 1.540971485  | 0.156268888 | 0.156268888 | -4.623248676 |
| 1460018_at   | -0.148712679 | 6.043291702 | -1.540880521 | 0.156290798 | 0.156290798 | -4.623353588 |
| 1455516_at   | -0.184951931 | 5.479513324 | -1.540782471 | 0.156314419 | 0.156314419 | -4.62346667  |
| 1460664_at   | -0.143731311 | 5.117545141 | -1.540603153 | 0.156357626 | 0.156357626 | -4.623673469 |
| 1423456_at   | 0.124162213  | 10.1891244  | 1.540532994  | 0.156374533 | 0.156374533 | -4.623754376 |
| 1416381_a_at | -0.101517717 | 9.613462662 | -1.540507307 | 0.156380724 | 0.156380724 | -4.623783997 |
| 1419636_at   | 0.287911204  | 8.624565664 | 1.54047994   | 0.15638732  | 0.15638732  | -4.623815556 |
| 1453762_at   | -0.112700902 | 7.546297223 | -1.540473941 | 0.156388766 | 0.156388766 | -4.623822474 |

|              |              |             |              |             |             |              |
|--------------|--------------|-------------|--------------|-------------|-------------|--------------|
| 1446528_at   | 0.257799265  | 5.187148701 | 1.540413393  | 0.15640336  | 0.15640336  | -4.623892295 |
| 1429522_at   | -0.125403099 | 4.288786908 | -1.540328144 | 0.156423909 | 0.156423909 | -4.623990598 |
| 1449781_at   | -0.135593105 | 3.904706004 | -1.540086543 | 0.156482161 | 0.156482161 | -4.624269176 |
| 1429896_at   | 0.200612113  | 8.410540005 | 1.539864906  | 0.156535617 | 0.156535617 | -4.624524716 |
| 1454472_at   | 0.15418806   | 4.515133234 | 1.539864149  | 0.156535799 | 0.156535799 | -4.624525589 |
| 1453437_at   | 0.147277083  | 7.01921149  | 1.539860628  | 0.156536648 | 0.156536648 | -4.624529647 |
| 1446318_at   | -0.141288268 | 6.828262787 | -1.539824467 | 0.156545371 | 0.156545371 | -4.624571338 |
| 1433179_at   | -0.141860232 | 4.495858258 | -1.539731384 | 0.156567828 | 0.156567828 | -4.624678652 |
| 1418221_at   | -0.125033495 | 3.709284196 | -1.539716841 | 0.156571336 | 0.156571336 | -4.624695418 |
| 1438407_at   | -0.101264296 | 9.272009236 | -1.539659674 | 0.15658513  | 0.15658513  | -4.624761322 |
| 1431595_at   | 0.147301751  | 5.565238997 | 1.539616432  | 0.156595564 | 0.156595564 | -4.624811174 |
| 1448814_at   | 0.171018215  | 7.742365233 | 1.539536077  | 0.156614955 | 0.156614955 | -4.624903807 |
| 1418129_at   | 0.266404148  | 7.895865601 | 1.539441401  | 0.156637804 | 0.156637804 | -4.625012946 |
| 1424334_at   | 0.108262932  | 6.082523571 | 1.539413477  | 0.156644544 | 0.156644544 | -4.625045135 |
| 1418601_at   | -0.245963689 | 8.983333444 | -1.539280926 | 0.156676541 | 0.156676541 | -4.625197928 |
| 1422229_at   | -0.160976268 | 3.756841358 | -1.538929107 | 0.156761494 | 0.156761494 | -4.625603439 |
| 1453394_at   | -0.108141674 | 4.800894495 | -1.538925419 | 0.156762385 | 0.156762385 | -4.625607689 |
| 1449161_at   | 0.206432842  | 4.794909025 | 1.538836452  | 0.156783875 | 0.156783875 | -4.625710226 |
| 1416675_s_at | -0.1229495   | 9.259507431 | -1.53878446  | 0.156796434 | 0.156796434 | -4.625770146 |
| 1451301_at   | -0.163609381 | 4.218994527 | -1.538738339 | 0.156807576 | 0.156807576 | -4.6258233   |
| 1433712_at   | 0.099793273  | 8.168513818 | 1.538567276  | 0.156848908 | 0.156848908 | -4.626020437 |
| 1429338_a_at | 0.15491369   | 5.576549627 | 1.538402797  | 0.156888658 | 0.156888658 | -4.626209978 |
| 1458514_at   | -0.203823703 | 6.571668743 | -1.538327211 | 0.156906929 | 0.156906929 | -4.626297076 |
| 1442058_s_at | 0.183629048  | 7.491852657 | 1.538322574  | 0.156908049 | 0.156908049 | -4.626302419 |
| 1432569_at   | -0.14152936  | 4.553978318 | -1.538103012 | 0.156961131 | 0.156961131 | -4.62655541  |
| 1455515_at   | -0.172077397 | 6.970855438 | -1.537991433 | 0.156988113 | 0.156988113 | -4.626683971 |
| 1419400_at   | -0.233056018 | 5.331588641 | -1.537975733 | 0.15699191  | 0.15699191  | -4.62670206  |
| 1445263_at   | -0.117818766 | 7.867341735 | -1.537967695 | 0.156993854 | 0.156993854 | -4.62671132  |
| 1430262_at   | -0.151206298 | 3.963967037 | -1.537910454 | 0.157007698 | 0.157007698 | -4.62677727  |
| 1447229_x_at | -0.118151081 | 6.902948786 | -1.537901722 | 0.15700981  | 0.15700981  | -4.626787331 |
| 1422862_at   | 0.126745418  | 4.419949568 | 1.537765878  | 0.157042669 | 0.157042669 | -4.626943837 |
| 1452535_at   | -0.102757781 | 4.660517598 | -1.537658282 | 0.157068699 | 0.157068699 | -4.627067793 |
| 1418856_a_at | -0.108845991 | 7.200794163 | -1.537593798 | 0.157084302 | 0.157084302 | -4.627142079 |
| 1443468_at   | -0.120147398 | 4.728017681 | -1.537587926 | 0.157085722 | 0.157085722 | -4.627148844 |
| 1424217_at   | 0.38992593   | 8.187911858 | 1.537538564  | 0.157097667 | 0.157097667 | -4.627205709 |
| 1457937_at   | -0.124927994 | 3.582159859 | -1.537524822 | 0.157100992 | 0.157100992 | -4.627221539 |
| 1441596_at   | 0.133608258  | 4.049903285 | 1.537523683  | 0.157101268 | 0.157101268 | -4.627222851 |
| 1448360_s_at | 0.110755915  | 9.334567299 | 1.537497937  | 0.157107498 | 0.157107498 | -4.62725251  |
| 1444615_x_at | 0.161284411  | 8.416805335 | 1.537429343  | 0.157124099 | 0.157124099 | -4.627331527 |
| 1418417_at   | -0.422992722 | 6.039657248 | -1.537424182 | 0.157125348 | 0.157125348 | -4.627337473 |
| 1417250_at   | 0.101180523  | 9.390574742 | 1.537393025  | 0.157132889 | 0.157132889 | -4.627373363 |
| 1445892_at   | -0.127868386 | 5.998485295 | -1.537332247 | 0.1571476   | 0.1571476   | -4.627443374 |
| 1457832_at   | 0.24114258   | 5.125313821 | 1.537318902  | 0.15715083  | 0.15715083  | -4.627458746 |
| 1417583_a_at | 0.133900678  | 9.297485788 | 1.537163127  | 0.15718854  | 0.15718854  | -4.627638177 |
| 1418758_a_at | 0.108892246  | 9.294424176 | 1.537083731  | 0.157207764 | 0.157207764 | -4.627729627 |
| 1444329_at   | -0.125056274 | 3.841048212 | -1.536651361 | 0.157312486 | 0.157312486 | -4.628227593 |
| 1460667_at   | -0.134290797 | 5.906700393 | -1.536541925 | 0.157339002 | 0.157339002 | -4.628353619 |
| 1428935_at   | 0.119481051  | 7.731416913 | 1.53648203   | 0.157353516 | 0.157353516 | -4.628422593 |
| 1427164_at   | 0.154601631  | 5.973325961 | 1.536366892  | 0.15738142  | 0.15738142  | -4.628555179 |
| 1460561_x_at | 0.127505638  | 12.4903596  | 1.536340836  | 0.157387735 | 0.157387735 | -4.628585182 |
| 1419676_at   | -0.13726675  | 5.385742631 | -1.536259644 | 0.157407416 | 0.157407416 | -4.628678674 |
| 1447687_x_at | -0.108778384 | 3.318457636 | -1.536240672 | 0.157412015 | 0.157412015 | -4.628700519 |
| 1451091_at   | -0.129599238 | 10.80965565 | -1.536223196 | 0.157416251 | 0.157416251 | -4.628720642 |

|              |              |             |              |             |             |              |
|--------------|--------------|-------------|--------------|-------------|-------------|--------------|
| 1423735_a_at | 0.122930261  | 7.857066066 | 1.536207999  | 0.157419935 | 0.157419935 | -4.62873814  |
| 1457557_at   | 0.379618862  | 7.453040736 | 1.536150641  | 0.157433841 | 0.157433841 | -4.628804185 |
| 1444164_at   | -0.466898236 | 6.078180317 | -1.536140902 | 0.157436202 | 0.157436202 | -4.628815398 |
| 1430436_at   | 0.171953815  | 6.643034414 | 1.535920643  | 0.15748961  | 0.15748961  | -4.629068999 |
| 1435052_at   | -0.27738492  | 6.721260765 | -1.535833474 | 0.157510752 | 0.157510752 | -4.629169358 |
| 1445206_at   | -0.104869493 | 4.929661058 | -1.535752834 | 0.157530312 | 0.157530312 | -4.629262197 |
| 1441971_at   | 0.173750206  | 7.204277034 | 1.535735142  | 0.157534603 | 0.157534603 | -4.629282565 |
| 1438736_at   | 0.239615087  | 9.008601706 | 1.535624468  | 0.157561453 | 0.157561453 | -4.629409977 |
| 1419749_at   | 0.108163533  | 7.660378444 | 1.53553432   | 0.157583325 | 0.157583325 | -4.629513755 |
| 1451854_a_at | -0.129406799 | 6.70506297  | -1.535524792 | 0.157585637 | 0.157585637 | -4.629524723 |
| 1458240_at   | 0.332166466  | 5.472616638 | 1.535423346  | 0.157610254 | 0.157610254 | -4.629641503 |
| 1423551_at   | 0.187054164  | 6.748499268 | 1.535377472  | 0.157621387 | 0.157621387 | -4.629694309 |
| 1441652_at   | 0.140107876  | 5.202754901 | 1.535330805  | 0.157632714 | 0.157632714 | -4.629748028 |
| 1446791_at   | -0.116874515 | 3.560297148 | -1.535327145 | 0.157633602 | 0.157633602 | -4.629752241 |
| 1451488_at   | -0.157212048 | 6.957468441 | -1.535229798 | 0.157657231 | 0.157657231 | -4.629864294 |
| 1417969_at   | -0.099099618 | 6.754749027 | -1.535146205 | 0.157677524 | 0.157677524 | -4.629960513 |
| 1452242_at   | -0.131550266 | 8.631928242 | -1.535104437 | 0.157687664 | 0.157687664 | -4.630008588 |
| 1450629_at   | 0.13746132   | 9.326528158 | 1.534950859  | 0.157724955 | 0.157724955 | -4.630185352 |
| 1455988_a_at | 0.121489414  | 12.03237918 | 1.534901491  | 0.157736944 | 0.157736944 | -4.630242171 |
| 1459874_s_at | 0.162559471  | 8.773253685 | 1.534890466  | 0.157739621 | 0.157739621 | -4.63025486  |
| 1433925_at   | 0.105321631  | 9.079205561 | 1.534849973  | 0.157749456 | 0.157749456 | -4.630301464 |
| 1421695_at   | 0.116029422  | 4.142588875 | 1.534671817  | 0.15779273  | 0.15779273  | -4.630506497 |
| 1446907_at   | -0.096071004 | 3.629130529 | -1.534594289 | 0.157811565 | 0.157811565 | -4.630595717 |
| 1427377_x_at | -0.131351257 | 5.669740134 | -1.534499586 | 0.157834575 | 0.157834575 | -4.6307047   |
| 1455294_at   | -0.145573973 | 8.020575173 | -1.534071144 | 0.15793871  | 0.15793871  | -4.631197695 |
| 1458438_at   | -0.128144232 | 6.304561714 | -1.533888736 | 0.157983064 | 0.157983064 | -4.631407564 |
| 1451810_at   | -0.16985509  | 3.997019146 | -1.533878862 | 0.157985465 | 0.157985465 | -4.631418924 |
| 1438915_at   | 0.151581562  | 7.546981791 | 1.533615638  | 0.158049491 | 0.158049491 | -4.631721752 |
| 1455108_at   | -0.107775677 | 7.846911721 | -1.533579937 | 0.158058176 | 0.158058176 | -4.631762822 |
| 1422132_at   | -0.145986146 | 5.387241883 | -1.533248533 | 0.158138821 | 0.158138821 | -4.632144043 |
| 1437028_at   | -0.112762695 | 6.378442241 | -1.533153734 | 0.158161897 | 0.158161897 | -4.632253083 |
| 1449373_at   | -0.173563517 | 6.462140499 | -1.533143143 | 0.158164475 | 0.158164475 | -4.632265265 |
| 1432443_at   | -0.228814669 | 5.043574959 | -1.533001177 | 0.158199038 | 0.158199038 | -4.632428551 |
| 1429702_at   | 0.209940614  | 4.961574347 | 1.532948074  | 0.158211968 | 0.158211968 | -4.632489627 |
| 1451142_at   | 0.133250098  | 8.366425943 | 1.532937166  | 0.158214624 | 0.158214624 | -4.632502173 |
| 1442441_at   | -0.109845972 | 4.4967999   | -1.532889136 | 0.158226319 | 0.158226319 | -4.632557413 |
| 1431749_a_at | -0.145343802 | 4.11841544  | -1.532830241 | 0.158240662 | 0.158240662 | -4.632625148 |
| 1459889_at   | -0.149929168 | 3.368614827 | -1.53282913  | 0.158240933 | 0.158240933 | -4.632626426 |
| 1430561_at   | 0.358841012  | 6.929881263 | 1.532813478  | 0.158244745 | 0.158244745 | -4.632644427 |
| 1431182_at   | -0.153476453 | 7.507122601 | -1.532787906 | 0.158250972 | 0.158250972 | -4.632673836 |
| 1458943_at   | 0.168069949  | 4.140359134 | 1.532667263  | 0.158280358 | 0.158280358 | -4.632812581 |
| 1449061_a_at | 0.129127532  | 9.268495715 | 1.532288417  | 0.158372665 | 0.158372665 | -4.633248231 |
| 1458996_at   | 0.129814532  | 5.036767066 | 1.53215604   | 0.15840493  | 0.15840493  | -4.633400443 |
| 1422482_at   | -0.136940118 | 10.4357054  | -1.532150155 | 0.158406365 | 0.158406365 | -4.63340721  |
| 1416710_at   | -0.108966681 | 6.713821346 | -1.53188929  | 0.158469965 | 0.158469965 | -4.633707141 |
| 1448637_at   | -0.114489706 | 8.170349609 | -1.531753398 | 0.158503105 | 0.158503105 | -4.633863372 |
| 1431733_at   | -0.167375026 | 4.142187825 | -1.53164029  | 0.158530694 | 0.158530694 | -4.633993404 |
| 1428375_at   | -0.239674777 | 6.540929633 | -1.531597981 | 0.158541014 | 0.158541014 | -4.634042042 |
| 1453240_a_at | 0.229476467  | 8.871397017 | 1.531483432  | 0.15856896  | 0.15856896  | -4.634173723 |
| 1437096_at   | -0.473519942 | 4.502943861 | -1.531237734 | 0.158628916 | 0.158628916 | -4.63445615  |
| 1418935_at   | -0.134624285 | 4.159851599 | -1.531003694 | 0.158686046 | 0.158686046 | -4.634725153 |
| 1425788_a_at | -0.099112762 | 7.934223058 | -1.530964559 | 0.158695601 | 0.158695601 | -4.634770132 |
| 1447171_at   | 0.242764526  | 4.768330994 | 1.530903257  | 0.158710568 | 0.158710568 | -4.634840588 |

|              |              |             |              |             |             |              |
|--------------|--------------|-------------|--------------|-------------|-------------|--------------|
| 1458830_at   | -0.170207587 | 4.038023264 | -1.530872068 | 0.158718184 | 0.158718184 | -4.634876433 |
| 1444101_at   | 0.115997674  | 5.996696858 | 1.530868136  | 0.158719144 | 0.158719144 | -4.634880953 |
| 1454450_at   | -0.176452746 | 4.261541327 | -1.530696197 | 0.158761134 | 0.158761134 | -4.635078554 |
| 1431598_a_at | -0.143071139 | 4.485455823 | -1.530621215 | 0.158779449 | 0.158779449 | -4.635164724 |
| 1431740_at   | -0.10894524  | 3.558077287 | -1.530606692 | 0.158782997 | 0.158782997 | -4.635181413 |
| 1430961_at   | 0.152467392  | 6.562316315 | 1.530562177  | 0.158793871 | 0.158793871 | -4.635232569 |
| 1452273_at   | 0.127038475  | 6.026647465 | 1.530374207  | 0.158839795 | 0.158839795 | -4.63544857  |
| 1453957_a_at | 0.114220205  | 7.740701247 | 1.530238833  | 0.158872877 | 0.158872877 | -4.635604123 |
| 1418896_a_at | -0.10927383  | 10.37937849 | -1.53019197  | 0.15888433  | 0.15888433  | -4.635657969 |
| 1436995_a_at | -0.146677474 | 13.96613289 | -1.530078412 | 0.158912087 | 0.158912087 | -4.635788446 |
| 1457662_x_at | 0.137457478  | 4.200626787 | 1.530058871  | 0.158916864 | 0.158916864 | -4.635810898 |
| 1421291_at   | 0.231028842  | 4.811403444 | 1.53001862   | 0.158926704 | 0.158926704 | -4.635857145 |
| 1452393_at   | 0.13576809   | 6.614159031 | 1.529992408  | 0.158933112 | 0.158933112 | -4.635887261 |
| 1417808_at   | 0.138242574  | 3.867039648 | 1.529954549  | 0.158942368 | 0.158942368 | -4.635930759 |
| 1450720_at   | 0.142703986  | 10.25898712 | 1.529870362  | 0.158962952 | 0.158962952 | -4.636027481 |
| 1444248_at   | -0.276913195 | 4.695550793 | -1.529869524 | 0.158963157 | 0.158963157 | -4.636028444 |
| 1440892_at   | -0.12954298  | 7.300510414 | -1.529794957 | 0.158981391 | 0.158981391 | -4.636114111 |
| 1420628_at   | 0.101755293  | 8.999464611 | 1.529724403  | 0.158998645 | 0.158998645 | -4.636195166 |
| 1438616_x_at | -0.094518265 | 3.941841693 | -1.52965859  | 0.159014741 | 0.159014741 | -4.636270772 |
| 1452151_at   | 0.15198302   | 7.769847587 | 1.529562198  | 0.159038319 | 0.159038319 | -4.636381505 |
| 1444521_at   | 0.144804922  | 7.156164522 | 1.52956117   | 0.15903857  | 0.15903857  | -4.636382687 |
| 1427979_at   | -0.202714694 | 6.320668089 | -1.529490765 | 0.159055794 | 0.159055794 | -4.636463564 |
| 1451024_at   | -0.142688131 | 5.995133709 | -1.529401486 | 0.159077636 | 0.159077636 | -4.63656612  |
| 1433538_at   | -0.124459084 | 8.899874165 | -1.52929602  | 0.159103443 | 0.159103443 | -4.636687265 |
| 1459483_at   | -0.141382905 | 4.156909025 | -1.529225991 | 0.15912058  | 0.15912058  | -4.636767703 |
| 1419037_at   | 0.128301399  | 9.274801888 | 1.529174221  | 0.15913325  | 0.15913325  | -4.636827167 |
| 1446552_at   | 0.126679871  | 3.758666407 | 1.528948083  | 0.159188605 | 0.159188605 | -4.637086899 |
| 1447605_at   | -0.111833426 | 3.104822318 | -1.528916823 | 0.159196259 | 0.159196259 | -4.637122801 |
| 1419501_at   | 0.124951501  | 6.289259758 | 1.528881449  | 0.15920492  | 0.15920492  | -4.637163428 |
| 1429295_s_at | 0.107024951  | 9.005981471 | 1.528790503  | 0.159227189 | 0.159227189 | -4.637267876 |
| 1448528_at   | 0.220489256  | 7.00321777  | 1.528781643  | 0.159229358 | 0.159229358 | -4.637278051 |
| 1449516_a_at | -0.094679351 | 6.162025171 | -1.528541607 | 0.159288147 | 0.159288147 | -4.637553707 |
| 1454351_at   | -0.129737118 | 3.902267664 | -1.528441067 | 0.159312777 | 0.159312777 | -4.637669159 |
| 1438799_at   | -0.236487109 | 4.417072535 | -1.528317908 | 0.159342952 | 0.159342952 | -4.637810579 |
| 1435822_at   | 0.118241243  | 8.15392142  | 1.528182481  | 0.159376139 | 0.159376139 | -4.63796608  |
| 1456097_a_at | -0.332599049 | 6.385325239 | -1.528135543 | 0.159387643 | 0.159387643 | -4.638019974 |
| 1428268_at   | 0.170032653  | 3.952607837 | 1.528087308  | 0.159399465 | 0.159399465 | -4.638075355 |
| 1444918_at   | -0.138935753 | 4.797279563 | -1.528079958 | 0.159401267 | 0.159401267 | -4.638083795 |
| 1419788_at   | -0.136376548 | 3.578828163 | -1.527825219 | 0.159463717 | 0.159463717 | -4.638376261 |
| 1421747_at   | 0.12510008   | 4.005816903 | 1.527606673  | 0.159517311 | 0.159517311 | -4.638627154 |
| 1451246_s_at | 0.141094243  | 7.835967606 | 1.527551904  | 0.159530745 | 0.159530745 | -4.638690026 |
| 1427452_at   | -0.135085178 | 5.77018225  | -1.527333352 | 0.159584361 | 0.159584361 | -4.638940901 |
| 1457678_at   | 0.207447041  | 6.748999753 | 1.527303139  | 0.159591774 | 0.159591774 | -4.638975581 |
| 1435906_x_at | 0.122321106  | 3.676146948 | 1.527042966  | 0.159655623 | 0.159655623 | -4.639274204 |
| 1460579_at   | 0.10405624   | 6.368923083 | 1.526953151  | 0.15967767  | 0.15967767  | -4.639377285 |
| 1451479_a_at | -0.180754044 | 7.378184573 | -1.526623371 | 0.159758644 | 0.159758644 | -4.639755751 |
| 1444321_at   | -0.149309093 | 4.421519    | -1.526588907 | 0.159767108 | 0.159767108 | -4.6397953   |
| 1427803_at   | 0.157249936  | 4.576132508 | 1.52648926   | 0.159791584 | 0.159791584 | -4.639909648 |
| 1424421_at   | -0.114932326 | 7.389135771 | -1.526300956 | 0.159837845 | 0.159837845 | -4.640125721 |
| 1458105_at   | 0.15948541   | 4.241565464 | 1.526264354  | 0.159846838 | 0.159846838 | -4.640167719 |
| 1425613_at   | -0.121622721 | 4.738155342 | -1.526252848 | 0.159849665 | 0.159849665 | -4.640180921 |
| 1449775_x_at | -0.122047794 | 3.610477296 | -1.52619356  | 0.159864234 | 0.159864234 | -4.640248948 |
| 1452229_at   | -0.169168715 | 6.020267678 | -1.526112804 | 0.15988408  | 0.15988408  | -4.640341605 |



|              |              |             |              |             |             |              |
|--------------|--------------|-------------|--------------|-------------|-------------|--------------|
| 1458260_at   | -0.121861608 | 4.703784737 | -1.52595518  | 0.159922822 | 0.159922822 | -4.640522451 |
| 1431895_at   | -0.190725485 | 4.332591022 | -1.525866082 | 0.159944726 | 0.159944726 | -4.640624671 |
| 1423330_at   | 0.127040316  | 7.408687638 | 1.525793169  | 0.159962652 | 0.159962652 | -4.640708318 |
| 1420584_at   | -0.134587784 | 5.503187904 | -1.525619382 | 0.160005386 | 0.160005386 | -4.640907685 |
| 1434717_at   | 0.120421841  | 8.492585916 | 1.525587474  | 0.160013233 | 0.160013233 | -4.640944288 |
| 1418189_s_at | 0.460368676  | 12.13199311 | 1.525356772  | 0.16006998  | 0.16006998  | -4.641208924 |
| 1454283_at   | -0.111601657 | 5.927178806 | -1.525282177 | 0.160088333 | 0.160088333 | -4.641294487 |
| 1454651_x_at | 0.112264382  | 3.388170816 | 1.524864729  | 0.160191071 | 0.160191071 | -4.641773271 |
| 1424002_at   | 0.121405495  | 9.397818038 | 1.52484915   | 0.160194907 | 0.160194907 | -4.641791138 |
| 1434988_x_at | 0.121323129  | 6.169047522 | 1.524497074  | 0.160281603 | 0.160281603 | -4.642194887 |
| 1428470_at   | -0.106531071 | 8.566473215 | -1.524338003 | 0.160320786 | 0.160320786 | -4.642377287 |
| 1438415_s_at | 0.148552274  | 6.733476088 | 1.524272634  | 0.160336891 | 0.160336891 | -4.642452241 |
| 1431935_at   | 0.24640954   | 5.138416611 | 1.524209851  | 0.16035236  | 0.16035236  | -4.642524227 |
| 1443766_x_at | -0.12184203  | 6.889190823 | -1.524104074 | 0.160378425 | 0.160378425 | -4.642645506 |
| 1454613_at   | 0.124915814  | 10.78296804 | 1.524008382  | 0.160402008 | 0.160402008 | -4.642755219 |
| 1436495_s_at | 0.102120025  | 9.674165724 | 1.523993721  | 0.160405622 | 0.160405622 | -4.642772027 |
| 1430834_at   | -0.144746125 | 3.831056028 | -1.523924467 | 0.160422692 | 0.160422692 | -4.642851424 |
| 1420065_at   | 0.127643819  | 3.721415898 | 1.523919759  | 0.160423852 | 0.160423852 | -4.642856822 |
| 1448825_at   | -0.119700754 | 6.727354658 | -1.523873618 | 0.160435226 | 0.160435226 | -4.64290972  |
| 1429154_at   | 0.114398073  | 6.479078517 | 1.523832837  | 0.160445279 | 0.160445279 | -4.642956473 |
| 1419240_at   | -0.126484402 | 5.328915208 | -1.523721998 | 0.160472606 | 0.160472606 | -4.643083539 |
| 1439313_at   | -0.182118267 | 6.241492812 | -1.523552518 | 0.160514397 | 0.160514397 | -4.643277821 |
| 1446498_at   | -0.116824795 | 4.562169692 | -1.523427595 | 0.160545208 | 0.160545208 | -4.643421018 |
| 1444224_at   | 0.115293813  | 6.126401532 | 1.523360772  | 0.160561691 | 0.160561691 | -4.643497613 |
| 1441697_at   | -0.132697333 | 3.764800441 | -1.523358656 | 0.160562213 | 0.160562213 | -4.64350004  |
| 1449003_a_at | 0.130585601  | 9.894073587 | 1.523274978  | 0.160582856 | 0.160582856 | -4.643595952 |
| 1429832_at   | -0.149962653 | 6.394774933 | -1.523229994 | 0.160593954 | 0.160593954 | -4.643647511 |
| 1459192_at   | -0.129772686 | 3.855214479 | -1.523223542 | 0.160595546 | 0.160595546 | -4.643654907 |
| 1434948_at   | 0.099307698  | 7.971151029 | 1.522976558  | 0.160656494 | 0.160656494 | -4.643937981 |
| 1431868_at   | -0.143288351 | 4.588125402 | -1.522744156 | 0.160713862 | 0.160713862 | -4.644204319 |
| 1448860_at   | 0.118197411  | 5.078503963 | 1.522653342  | 0.160736284 | 0.160736284 | -4.644308388 |
| 1445155_at   | -0.245407123 | 3.797539185 | -1.52245035  | 0.160786413 | 0.160786413 | -4.644540996 |
| 1444185_at   | 0.10863526   | 6.282748738 | 1.522419362  | 0.160794067 | 0.160794067 | -4.644576504 |
| 1416621_at   | 0.103075538  | 10.10437431 | 1.522293587  | 0.160825135 | 0.160825135 | -4.64472062  |
| 1416183_a_at | -0.120929587 | 9.676576089 | -1.522166139 | 0.160856622 | 0.160856622 | -4.644866645 |
| 1421836_at   | 0.132038198  | 7.570254399 | 1.522154151  | 0.160859584 | 0.160859584 | -4.64488038  |
| 1435743_at   | 0.095026278  | 8.329013199 | 1.522037732  | 0.160888352 | 0.160888352 | -4.645013762 |
| 1424153_s_at | 0.192300068  | 4.326050944 | 1.521962724  | 0.160906889 | 0.160906889 | -4.645099697 |
| 1437899_at   | -0.131017679 | 3.980576864 | -1.521923266 | 0.160916641 | 0.160916641 | -4.645144902 |
| 1455367_at   | -0.114819053 | 5.576278204 | -1.521906438 | 0.1609208   | 0.1609208   | -4.645164181 |
| 1438073_at   | -0.158977123 | 3.711351775 | -1.521859488 | 0.160932405 | 0.160932405 | -4.645217968 |
| 1454154_at   | 0.133685663  | 4.070548435 | 1.521628435  | 0.160989526 | 0.160989526 | -4.645482655 |
| 1440156_s_at | -0.182986314 | 7.79119861  | -1.521531088 | 0.161013598 | 0.161013598 | -4.645594166 |
| 1424950_at   | -0.145598032 | 7.595449798 | -1.521350687 | 0.161058215 | 0.161058215 | -4.645800805 |
| 1431669_at   | 0.125540439  | 3.816059135 | 1.521279631  | 0.161075791 | 0.161075791 | -4.645882192 |
| 1451658_a_at | 0.097760987  | 7.120972231 | 1.521075797  | 0.161126222 | 0.161126222 | -4.64611565  |
| 1455910_at   | -0.192372091 | 7.401632753 | -1.520967088 | 0.161153123 | 0.161153123 | -4.646240151 |
| 1454537_at   | -0.171541306 | 4.653814443 | -1.52093737  | 0.161160478 | 0.161160478 | -4.646274185 |
| 1418155_at   | -0.607147656 | 4.810243924 | -1.520902917 | 0.161169005 | 0.161169005 | -4.646313642 |
| 1430455_at   | -0.136761293 | 3.362147679 | -1.520871571 | 0.161176763 | 0.161176763 | -4.64634954  |
| 1423037_at   | 0.133879545  | 8.10928705  | 1.520865384  | 0.161178294 | 0.161178294 | -4.646356625 |
| 1420161_at   | -0.123017768 | 6.501465193 | -1.52080323  | 0.161193679 | 0.161193679 | -4.646427803 |
| 1451656_at   | -0.270840583 | 4.558480958 | -1.520732785 | 0.161211117 | 0.161211117 | -4.646508475 |

|              |              |             |              |             |             |              |
|--------------|--------------|-------------|--------------|-------------|-------------|--------------|
| 1429578_at   | 0.143617919  | 3.698302378 | 1.520726079  | 0.161212777 | 0.161212777 | -4.646516154 |
| 1425521_at   | -0.831809682 | 5.290597956 | -1.520648466 | 0.161231992 | 0.161231992 | -4.646605031 |
| 1457106_at   | -0.119186823 | 5.165068209 | -1.520563719 | 0.161252976 | 0.161252976 | -4.646702075 |
| 1443181_at   | -0.155777526 | 5.39956939  | -1.52050123  | 0.16126845  | 0.16126845  | -4.646773629 |
| 1420831_at   | -0.142078626 | 7.730021948 | -1.520493578 | 0.161270345 | 0.161270345 | -4.646782392 |
| 1440856_at   | 0.120458903  | 7.535100587 | 1.520459753  | 0.161278721 | 0.161278721 | -4.646821123 |
| 1447016_at   | 0.189333452  | 4.161523663 | 1.520429973  | 0.161286096 | 0.161286096 | -4.646855222 |
| 1458572_at   | -0.135129581 | 3.685761301 | -1.520383182 | 0.161297685 | 0.161297685 | -4.646908799 |
| 1439013_x_at | -0.134504893 | 6.508750293 | -1.520373336 | 0.161300123 | 0.161300123 | -4.646920072 |
| 1416334_at   | -0.203387407 | 6.746357176 | -1.520223413 | 0.16133726  | 0.16133726  | -4.64709173  |
| 1443530_at   | 0.104427209  | 4.177006493 | 1.520210668  | 0.161340417 | 0.161340417 | -4.647106322 |
| 1440876_at   | 0.114568202  | 6.27946327  | 1.520194137  | 0.161344513 | 0.161344513 | -4.647125249 |
| 1440082_at   | 0.113287075  | 6.51954194  | 1.5201925    | 0.161344918 | 0.161344918 | -4.647127123 |
| 1453961_a_at | -0.216428596 | 5.932408413 | -1.520094447 | 0.161369211 | 0.161369211 | -4.647239385 |
| 1453826_at   | -0.124017444 | 4.387134961 | -1.519794528 | 0.161443538 | 0.161443538 | -4.647582741 |
| 1422984_at   | -0.172681284 | 5.609178278 | -1.519748624 | 0.161454916 | 0.161454916 | -4.64763529  |
| 1435977_at   | 0.167944906  | 8.263123363 | 1.519740522  | 0.161456925 | 0.161456925 | -4.647644565 |
| 1432629_at   | -0.133665056 | 3.768712053 | -1.519699069 | 0.161467201 | 0.161467201 | -4.647692017 |
| 1448426_at   | -0.145504781 | 6.072865861 | -1.519696007 | 0.16146796  | 0.16146796  | -4.647695523 |
| 1434909_at   | -0.361407312 | 6.659021643 | -1.519580202 | 0.161496671 | 0.161496671 | -4.647828084 |
| 1438125_at   | 0.143872799  | 4.287944153 | 1.51922997   | 0.161583529 | 0.161583529 | -4.648228963 |
| 1442127_at   | -0.144098568 | 5.331106792 | -1.519171801 | 0.161597959 | 0.161597959 | -4.648295539 |
| 1443790_x_at | 0.201216934  | 6.037170151 | 1.519109895  | 0.161613317 | 0.161613317 | -4.64836639  |
| 1436372_a_at | -0.119108985 | 8.48632353  | -1.519010646 | 0.161637943 | 0.161637943 | -4.648479977 |
| 1460505_at   | 0.139463203  | 3.558891755 | 1.518936707  | 0.16165629  | 0.16165629  | -4.648564594 |
| 1431227_at   | -0.107529078 | 6.456679928 | -1.518771179 | 0.161697372 | 0.161697372 | -4.648754021 |
| 1446529_at   | 0.418092207  | 7.106752684 | 1.518757345  | 0.161700806 | 0.161700806 | -4.648769852 |
| 1460005_at   | 0.11503299   | 7.415683384 | 1.518676141  | 0.161720964 | 0.161720964 | -4.648862776 |
| 1422134_at   | 0.137749798  | 3.729001514 | 1.518528164  | 0.161757702 | 0.161757702 | -4.649032103 |
| 1437428_x_at | -0.119253696 | 7.234502051 | -1.518303529 | 0.161813486 | 0.161813486 | -4.64928913  |
| 1452647_a_at | 0.107979381  | 6.419828866 | 1.518297723  | 0.161814929 | 0.161814929 | -4.649295773 |
| 1456426_at   | 0.130846138  | 3.142441962 | 1.518142699  | 0.161853436 | 0.161853436 | -4.649473139 |
| 1420356_at   | -0.110835449 | 4.41614786  | -1.517940712 | 0.161903622 | 0.161903622 | -4.649704221 |
| 1441824_at   | -0.105721528 | 4.014539743 | -1.517793092 | 0.161940308 | 0.161940308 | -4.649873095 |
| 1420386_at   | -0.132027527 | 6.36011032  | -1.517743055 | 0.161952744 | 0.161952744 | -4.649930333 |
| 1422470_at   | -0.095786881 | 9.734213402 | -1.517696627 | 0.161964285 | 0.161964285 | -4.649983443 |
| 1442890_at   | -0.126057503 | 7.160497481 | -1.517616008 | 0.161984326 | 0.161984326 | -4.650075661 |
| 1437320_s_at | -0.104812081 | 5.402925492 | -1.517603058 | 0.161987545 | 0.161987545 | -4.650090475 |
| 1425375_at   | -0.128193705 | 3.69719687  | -1.517557259 | 0.161998932 | 0.161998932 | -4.650142863 |
| 1444847_at   | -0.097729846 | 3.686649087 | -1.517534068 | 0.162004698 | 0.162004698 | -4.65016939  |
| 1429403_x_at | -0.116363495 | 8.165986269 | -1.517306084 | 0.16206139  | 0.16206139  | -4.650430155 |
| 1429232_at   | 0.168047574  | 5.577708983 | 1.517126375  | 0.16210609  | 0.16210609  | -4.65063569  |
| 1425757_a_at | -0.140033557 | 3.661643789 | -1.517115504 | 0.162108794 | 0.162108794 | -4.650648122 |
| 1452502_at   | 0.128513219  | 4.569148699 | 1.516928901  | 0.162155221 | 0.162155221 | -4.650861526 |
| 1427810_at   | 0.10070204   | 3.976610793 | 1.516907583  | 0.162160526 | 0.162160526 | -4.650885904 |
| 1430647_at   | -0.189310771 | 5.143421501 | -1.516869583 | 0.162169982 | 0.162169982 | -4.65092936  |
| 1460000_at   | 0.403249083  | 6.143251541 | 1.516820994  | 0.162182074 | 0.162182074 | -4.650984925 |
| 1445251_at   | -0.102040554 | 3.661368776 | -1.516742772 | 0.162201542 | 0.162201542 | -4.651074373 |
| 1459984_at   | 0.19005627   | 7.734393525 | 1.516680493  | 0.162217043 | 0.162217043 | -4.651145589 |
| 1424062_at   | 0.123463958  | 8.985073959 | 1.516661785  | 0.1622217   | 0.1622217   | -4.651166981 |
| 1452313_at   | 0.099187125  | 9.313111453 | 1.516534715  | 0.162253333 | 0.162253333 | -4.65131228  |
| 1440341_at   | 0.160466628  | 6.29740217  | 1.516476673  | 0.162267784 | 0.162267784 | -4.651378645 |
| 1449291_a_at | 0.152016802  | 7.511266745 | 1.516314075  | 0.162308273 | 0.162308273 | -4.651564555 |

|                    |              |             |              |             |             |              |
|--------------------|--------------|-------------|--------------|-------------|-------------|--------------|
| 1433043_at         | 0.484981004  | 5.755691627 | 1.516226709  | 0.162330031 | 0.162330031 | -4.651664441 |
| 1419078_at         | -0.18871831  | 6.930608928 | -1.516145176 | 0.16235034  | 0.16235034  | -4.651757656 |
| 1457296_at         | -0.194763867 | 5.230614721 | -1.516131345 | 0.162353785 | 0.162353785 | -4.651773469 |
| AFFX-r2-Bs-dap-3_ç | 0.149846616  | 9.181230025 | 1.516037077  | 0.162377269 | 0.162377269 | -4.65188124  |
| 1447676_x_at       | 0.114333034  | 9.126586751 | 1.516019996  | 0.162381524 | 0.162381524 | -4.651900767 |
| 1443433_at         | 0.111913143  | 3.409285516 | 1.516015753  | 0.162382581 | 0.162382581 | -4.651905618 |
| 1438952_x_at       | 0.119814588  | 7.076671953 | 1.515994475  | 0.162387883 | 0.162387883 | -4.651929943 |
| 1431097_at         | 0.179491534  | 4.996779413 | 1.515483209  | 0.162515306 | 0.162515306 | -4.652514368 |
| 1418628_at         | 0.120886076  | 9.258821572 | 1.515310701  | 0.16255832  | 0.16255832  | -4.652711537 |
| 1417578_a_at       | -0.115480732 | 8.192942227 | -1.515292323 | 0.162562903 | 0.162562903 | -4.652732542 |
| 1441570_at         | 0.235308191  | 6.252462421 | 1.515291887  | 0.162563012 | 0.162563012 | -4.65273304  |
| 1434840_at         | 0.134643014  | 7.965637665 | 1.515032212  | 0.162627782 | 0.162627782 | -4.653029812 |
| 1450465_at         | -0.121563136 | 3.880107449 | -1.514971652 | 0.16264289  | 0.16264289  | -4.653099019 |
| 1458834_at         | 0.12822456   | 3.138162321 | 1.514917011  | 0.162656523 | 0.162656523 | -4.653161461 |
| 1417634_at         | 0.090329811  | 4.605790447 | 1.514896473  | 0.162661647 | 0.162661647 | -4.65318493  |
| 1423276_at         | -0.110918372 | 4.652489092 | -1.514856194 | 0.162671698 | 0.162671698 | -4.653230959 |
| 1427210_at         | -0.145059843 | 6.568263414 | -1.514848489 | 0.162673621 | 0.162673621 | -4.653239764 |
| 1456753_at         | -0.110757641 | 8.304503539 | -1.514842698 | 0.162675065 | 0.162675065 | -4.653246381 |
| 1451524_at         | 0.153369616  | 7.036973386 | 1.514828985  | 0.162678487 | 0.162678487 | -4.653262051 |
| 1434222_at         | -0.134506775 | 8.261790189 | -1.514642857 | 0.162724939 | 0.162724939 | -4.653474737 |
| 1419703_at         | 0.183819304  | 6.090885147 | 1.514621115  | 0.162730366 | 0.162730366 | -4.653499579 |
| 1460575_at         | 0.093245629  | 8.394852882 | 1.514582961  | 0.16273989  | 0.16273989  | -4.653543175 |
| 1428035_at         | -0.152888447 | 5.022362948 | -1.514491346 | 0.16276276  | 0.16276276  | -4.653647855 |
| 1442298_at         | -0.112895134 | 7.758673136 | -1.514470309 | 0.162768012 | 0.162768012 | -4.653671891 |
| 1459742_at         | -0.140547523 | 3.304179801 | -1.514457168 | 0.162771293 | 0.162771293 | -4.653686905 |
| 1446694_at         | 0.116664245  | 4.956458811 | 1.514379061  | 0.162790794 | 0.162790794 | -4.653776147 |
| 1459435_at         | -0.112276825 | 4.015362013 | -1.514374881 | 0.162791838 | 0.162791838 | -4.653780922 |
| 1437557_at         | -0.099266815 | 6.996766653 | -1.514358263 | 0.162795987 | 0.162795987 | -4.653799909 |
| 1417178_at         | -0.130866845 | 5.951640164 | -1.514340979 | 0.162800303 | 0.162800303 | -4.653819656 |
| 1428156_at         | 0.113233428  | 8.782566898 | 1.514299089  | 0.162810763 | 0.162810763 | -4.653867516 |
| 1426621_a_at       | 0.118132225  | 7.306357678 | 1.514265217  | 0.162819222 | 0.162819222 | -4.653906214 |
| 1425369_a_at       | 0.14019104   | 4.686978749 | 1.514212669  | 0.162832345 | 0.162832345 | -4.653966249 |
| 1457895_at         | 0.118447875  | 3.564158161 | 1.514166335  | 0.162843917 | 0.162843917 | -4.654019183 |
| 1429923_x_at       | -0.099989582 | 3.842100991 | -1.514128739 | 0.162853307 | 0.162853307 | -4.654062135 |
| 1430393_at         | -0.242352155 | 6.235791055 | -1.514035777 | 0.162876528 | 0.162876528 | -4.654168336 |
| 1419893_at         | -0.17629565  | 3.624798265 | -1.514025349 | 0.162879133 | 0.162879133 | -4.654180249 |
| 1436415_at         | 0.197957136  | 5.23713756  | 1.513998612  | 0.162885812 | 0.162885812 | -4.654210792 |
| 1442335_at         | 0.134482707  | 3.908618398 | 1.513992352  | 0.162887376 | 0.162887376 | -4.654217944 |
| 1452375_at         | -0.155011481 | 6.992250098 | -1.51398828  | 0.162888394 | 0.162888394 | -4.654222596 |
| 1422705_at         | 0.169447402  | 7.522689345 | 1.513881481  | 0.162915076 | 0.162915076 | -4.654344597 |
| 1418435_at         | 0.119560004  | 7.898771539 | 1.513708523  | 0.162958295 | 0.162958295 | -4.654542165 |
| 1460212_at         | 0.145548143  | 4.117618092 | 1.513529326  | 0.163003085 | 0.163003085 | -4.654746848 |
| 1434228_at         | 0.105892603  | 7.326549215 | 1.513522156  | 0.163004877 | 0.163004877 | -4.654755037 |
| 1452344_at         | 0.168569221  | 6.038666341 | 1.51351219   | 0.163007368 | 0.163007368 | -4.65476642  |
| 1437785_at         | -0.167496043 | 9.212516255 | -1.513339856 | 0.163050454 | 0.163050454 | -4.654963249 |
| 1438858_x_at       | 0.183544973  | 5.103987358 | 1.51325861   | 0.163070769 | 0.163070769 | -4.655056039 |
| 1456525_at         | 0.125029528  | 4.848253663 | 1.513160208  | 0.163095378 | 0.163095378 | -4.655168419 |
| 1419279_at         | -0.131855007 | 7.574543333 | -1.512837167 | 0.163176187 | 0.163176187 | -4.655537319 |
| 1442267_at         | -0.182533017 | 6.594761926 | -1.51282227  | 0.163179915 | 0.163179915 | -4.655554331 |
| 1431089_at         | 0.143435369  | 6.480465235 | 1.51280841   | 0.163183383 | 0.163183383 | -4.655570157 |
| 1418162_at         | 0.180733044  | 4.358304017 | 1.512672459  | 0.163217403 | 0.163217403 | -4.655725394 |
| 1435435_at         | 0.123062555  | 6.829941071 | 1.512659923  | 0.163220541 | 0.163220541 | -4.655739707 |
| 1424411_at         | -0.121000386 | 7.702390981 | -1.5126022   | 0.163234987 | 0.163234987 | -4.655805616 |

|              |              |             |              |             |             |              |
|--------------|--------------|-------------|--------------|-------------|-------------|--------------|
| 1427186_a_at | -0.14364161  | 8.683925641 | -1.51238094  | 0.163290374 | 0.163290374 | -4.65605824  |
| 1459356_at   | 0.123340529  | 3.873608401 | 1.512288254  | 0.16331358  | 0.16331358  | -4.656164059 |
| 1425096_a_at | -0.160089423 | 6.022908166 | -1.512256411 | 0.163321554 | 0.163321554 | -4.656200413 |
| 1432159_a_at | -0.135523287 | 4.117921588 | -1.512221915 | 0.163330192 | 0.163330192 | -4.656239795 |
| 1427141_at   | 0.128662687  | 5.498605124 | 1.512115954  | 0.163356728 | 0.163356728 | -4.656360761 |
| 1431686_a_at | 0.18776752   | 7.523827007 | 1.512045774  | 0.163374305 | 0.163374305 | -4.656440878 |
| 1451222_at   | 0.103639909  | 9.287448813 | 1.512027434  | 0.163378899 | 0.163378899 | -4.656461814 |
| 1430303_at   | 0.138932902  | 7.260594557 | 1.511983353  | 0.163389941 | 0.163389941 | -4.656512135 |
| 1421520_at   | -0.120955037 | 5.813454881 | -1.511929607 | 0.163403405 | 0.163403405 | -4.656573487 |
| 1453812_at   | -0.125117811 | 3.386555683 | -1.511784258 | 0.16343982  | 0.16343982  | -4.656739401 |
| 1422196_at   | 0.11952274   | 3.841013586 | 1.511731681  | 0.163452994 | 0.163452994 | -4.656799415 |
| 1426236_a_at | 0.142970623  | 9.882786694 | 1.511529436  | 0.16350368  | 0.16350368  | -4.657030257 |
| 1438054_x_at | 0.146398378  | 3.267245158 | 1.51142432   | 0.163530029 | 0.163530029 | -4.657150229 |
| 1451949_at   | 0.119421589  | 4.179136198 | 1.511406463  | 0.163534505 | 0.163534505 | -4.657170609 |
| 1455003_at   | 0.109649791  | 7.860756995 | 1.511175113  | 0.163592511 | 0.163592511 | -4.657434637 |
| 1460179_at   | 0.103429462  | 10.39325016 | 1.511164112  | 0.16359527  | 0.16359527  | -4.657447192 |
| 1456336_at   | 0.133956945  | 3.703861969 | 1.510959162  | 0.163646673 | 0.163646673 | -4.657681073 |
| 1427987_at   | -0.10781527  | 8.085938606 | -1.510913447 | 0.16365814  | 0.16365814  | -4.657733238 |
| 1436015_s_at | 0.125403226  | 9.227391845 | 1.510712373  | 0.163708588 | 0.163708588 | -4.657962674 |
| 1459213_at   | -0.222737069 | 4.814431632 | -1.510631805 | 0.163728805 | 0.163728805 | -4.658054603 |
| 1418817_at   | 0.179430945  | 8.095053382 | 1.510570904  | 0.163744089 | 0.163744089 | -4.658124088 |
| 1421080_at   | -0.099258554 | 6.878016757 | -1.510431757 | 0.163779014 | 0.163779014 | -4.658282845 |
| 1445803_at   | 0.109121514  | 3.28210546  | 1.510391368  | 0.163789153 | 0.163789153 | -4.658328924 |
| 1460390_at   | -0.167811869 | 4.947798612 | -1.510292203 | 0.163814048 | 0.163814048 | -4.658442058 |
| 1455365_at   | -0.128760023 | 3.571201579 | -1.510277747 | 0.163817677 | 0.163817677 | -4.658458549 |
| 1432686_at   | 0.16221573   | 6.415823882 | 1.510125398  | 0.163855932 | 0.163855932 | -4.658632349 |
| 1458289_at   | -0.118747398 | 3.507310896 | -1.510067199 | 0.163870547 | 0.163870547 | -4.65869874  |
| 1437798_at   | -0.247589795 | 7.810585236 | -1.510016864 | 0.163883189 | 0.163883189 | -4.658756159 |
| 1424353_at   | -0.099104856 | 8.523752657 | -1.50997346  | 0.163894091 | 0.163894091 | -4.658805671 |
| 1428573_at   | -0.173996556 | 6.257357688 | -1.509872584 | 0.16391943  | 0.16391943  | -4.658920738 |
| 1444176_at   | -0.249926904 | 4.792650904 | -1.509834008 | 0.16392912  | 0.16392912  | -4.65896474  |
| 1439394_x_at | -0.09980686  | 7.703608323 | -1.509637113 | 0.163978591 | 0.163978591 | -4.65918932  |
| 1418142_at   | 0.178116166  | 6.563151906 | 1.509548533  | 0.164000851 | 0.164000851 | -4.65929035  |
| 1422306_at   | -0.166182102 | 4.499664913 | -1.509372049 | 0.16404521  | 0.16404521  | -4.659491628 |
| 1452516_at   | -0.095576628 | 4.03474734  | -1.509358995 | 0.164048492 | 0.164048492 | -4.659506516 |
| 1436354_at   | -0.142578392 | 7.719534205 | -1.509320882 | 0.164058073 | 0.164058073 | -4.659549981 |
| 1441659_at   | -0.120424269 | 7.594557231 | -1.509286785 | 0.164066645 | 0.164066645 | -4.659588867 |
| 1449540_at   | -0.183219995 | 4.168192227 | -1.509231138 | 0.164080635 | 0.164080635 | -4.659652327 |
| 1449899_at   | -0.158625587 | 4.253143519 | -1.509209862 | 0.164085984 | 0.164085984 | -4.65967659  |
| 1418767_at   | 0.125175737  | 5.71719094  | 1.509107564  | 0.164111707 | 0.164111707 | -4.659793247 |
| 1453223_s_at | -0.122961887 | 3.392771799 | -1.509049378 | 0.164126339 | 0.164126339 | -4.659859598 |
| 1418971_x_at | 0.090443937  | 8.616036217 | 1.508976829  | 0.164144586 | 0.164144586 | -4.659942327 |
| 1450859_s_at | 0.114462987  | 9.288019286 | 1.508966406  | 0.164147207 | 0.164147207 | -4.659954212 |
| 1435043_at   | -0.205979555 | 7.973369249 | -1.508945522 | 0.16415246  | 0.16415246  | -4.659978025 |
| 1417507_at   | -0.144776882 | 7.302250081 | -1.508470427 | 0.164271994 | 0.164271994 | -4.660519719 |
| 1428641_at   | -0.142589413 | 5.488845388 | -1.508385135 | 0.164293462 | 0.164293462 | -4.660616957 |
| 1430345_at   | 0.182375144  | 4.699011553 | 1.508304085  | 0.164313864 | 0.164313864 | -4.660709356 |
| 1429203_at   | 0.161425285  | 4.800561493 | 1.508272546  | 0.164321804 | 0.164321804 | -4.660745311 |
| 1435050_at   | -0.137880199 | 5.71829047  | -1.508184819 | 0.16434389  | 0.16434389  | -4.660845318 |
| 1458709_a_at | -0.134156504 | 3.741625723 | -1.508160037 | 0.16435013  | 0.16435013  | -4.660873569 |
| 1430162_at   | -0.119612716 | 4.251388008 | -1.507718919 | 0.16446123  | 0.16446123  | -4.661376381 |
| 1426968_a_at | 0.150530063  | 8.856205288 | 1.507662068  | 0.164475553 | 0.164475553 | -4.661441177 |
| 1425354_a_at | 0.120957049  | 9.270941691 | 1.507658455  | 0.164476464 | 0.164476464 | -4.661445294 |

|              |              |             |              |             |             |              |
|--------------|--------------|-------------|--------------|-------------|-------------|--------------|
| 1436328_at   | 0.105212994  | 7.409387455 | 1.507624597  | 0.164484994 | 0.164484994 | -4.661483884 |
| 1443434_s_at | -0.104788073 | 4.531560499 | -1.507397625 | 0.164542193 | 0.164542193 | -4.66174256  |
| 1451630_at   | 0.142097056  | 6.674699134 | 1.507389857  | 0.164544151 | 0.164544151 | -4.661751412 |
| 1432412_at   | -0.141461433 | 4.532577665 | -1.507177434 | 0.164597699 | 0.164597699 | -4.661993486 |
| 1423239_at   | -0.101989801 | 7.792288352 | -1.507130583 | 0.164609511 | 0.164609511 | -4.662046874 |
| 1425595_at   | -0.109564915 | 4.408569492 | -1.507125798 | 0.164610718 | 0.164610718 | -4.662052327 |
| 1449139_at   | -0.115541539 | 11.61175556 | -1.507083116 | 0.16462148  | 0.16462148  | -4.662100964 |
| 1429949_at   | 0.144180075  | 6.561548948 | 1.506954452  | 0.164653925 | 0.164653925 | -4.662247573 |
| 1445497_at   | -0.118173435 | 4.072344384 | -1.506859342 | 0.164677913 | 0.164677913 | -4.662355944 |
| 1450619_x_at | -0.158965476 | 5.141671826 | -1.506803193 | 0.164692076 | 0.164692076 | -4.66241992  |
| 1444592_at   | -0.102931338 | 4.676014236 | -1.50666542  | 0.164726832 | 0.164726832 | -4.662576893 |
| 1435247_at   | 0.099175135  | 9.301771388 | 1.506588937  | 0.164746129 | 0.164746129 | -4.66266403  |
| 1445127_at   | -0.174277859 | 3.775850951 | -1.506538565 | 0.164758839 | 0.164758839 | -4.662721418 |
| 1429531_at   | -0.118614655 | 7.161447201 | -1.506499442 | 0.164768711 | 0.164768711 | -4.66276599  |
| 1436663_at   | 0.10045289   | 5.434361469 | 1.506277483  | 0.164824731 | 0.164824731 | -4.663018848 |
| 1418502_a_at | 0.112734977  | 8.973884103 | 1.506147031  | 0.164857663 | 0.164857663 | -4.663167451 |
| 1454004_at   | -0.105646849 | 4.15216644  | -1.506081277 | 0.164874264 | 0.164874264 | -4.663242351 |
| 1423468_at   | -0.096559324 | 5.465869307 | -1.505594519 | 0.164997206 | 0.164997206 | -4.66379676  |
| 1431195_at   | 0.156021882  | 6.616119165 | 1.505372249  | 0.165053372 | 0.165053372 | -4.664049888 |
| 1417468_at   | 0.128135637  | 8.036206824 | 1.505037352  | 0.16513803  | 0.16513803  | -4.664431241 |
| 1421409_at   | -0.146469717 | 6.119309375 | -1.504980213 | 0.165152477 | 0.165152477 | -4.664496301 |
| 1449106_at   | -0.155397948 | 8.070962298 | -1.504853529 | 0.165184514 | 0.165184514 | -4.664640544 |
| 1425124_at   | -0.124448679 | 4.013612596 | -1.504825937 | 0.165191492 | 0.165191492 | -4.664671958 |
| 1460488_at   | -0.098534789 | 5.310917534 | -1.504734457 | 0.165214631 | 0.165214631 | -4.664776113 |
| 1422624_at   | 0.112541664  | 8.57829166  | 1.504697616  | 0.165223949 | 0.165223949 | -4.664818056 |
| 1430399_at   | 0.153206147  | 5.362205324 | 1.504666756  | 0.165231756 | 0.165231756 | -4.66485319  |
| 1445948_at   | 0.121356995  | 3.573713902 | 1.504544008  | 0.16526281  | 0.16526281  | -4.664992934 |
| 1453513_at   | -0.102003441 | 4.484294976 | -1.50446019  | 0.165284018 | 0.165284018 | -4.665088355 |
| 1417737_at   | 0.113993111  | 8.321830757 | 1.504440859  | 0.16528891  | 0.16528891  | -4.665110361 |
| 1426807_at   | 0.138021717  | 5.859510947 | 1.504170173  | 0.165357418 | 0.165357418 | -4.665418494 |
| 1457996_at   | 0.312740123  | 6.147722455 | 1.504118071  | 0.165370608 | 0.165370608 | -4.665477801 |
| 1433357_at   | -0.12031733  | 3.762252287 | -1.50380242  | 0.165450534 | 0.165450534 | -4.665837073 |
| 1439277_at   | -0.102446883 | 4.556244287 | -1.50373365  | 0.165467952 | 0.165467952 | -4.665915341 |
| 1446453_at   | 0.105452323  | 5.189015886 | 1.503727254  | 0.165469571 | 0.165469571 | -4.66592262  |
| 1420818_at   | 0.151334627  | 4.942565222 | 1.503721174  | 0.165471112 | 0.165471112 | -4.66592954  |
| 1450609_at   | -0.11833314  | 4.444346526 | -1.503570425 | 0.165509299 | 0.165509299 | -4.666101102 |
| 1448129_at   | 0.09900123   | 10.39168714 | 1.503347083  | 0.165565889 | 0.165565889 | -4.666355262 |
| 1446367_at   | -0.127226567 | 4.303949837 | -1.503304601 | 0.165576655 | 0.165576655 | -4.666403604 |
| 1419851_at   | -0.123188199 | 3.55282935  | -1.503274257 | 0.165584345 | 0.165584345 | -4.666438132 |
| 1443729_at   | -0.136020207 | 6.72492618  | -1.503238203 | 0.165593483 | 0.165593483 | -4.666479159 |
| 1445393_at   | 0.160417928  | 4.091514059 | 1.503209285  | 0.165600813 | 0.165600813 | -4.666512064 |
| 1441581_at   | -0.132849913 | 4.119765638 | -1.503172109 | 0.165610236 | 0.165610236 | -4.666554366 |
| 1443748_x_at | 0.127420844  | 3.146764877 | 1.503068242  | 0.165636566 | 0.165636566 | -4.66667255  |
| 1440339_at   | -0.309679225 | 6.361265293 | -1.502977967 | 0.165659453 | 0.165659453 | -4.666775265 |
| 1428627_at   | 0.097611961  | 6.331280844 | 1.502712671  | 0.165726729 | 0.165726729 | -4.6670771   |
| 1428064_at   | -0.107362574 | 8.163623385 | -1.502711003 | 0.165727152 | 0.165727152 | -4.667078998 |
| 1437891_at   | 0.105199397  | 9.629378348 | 1.502502131  | 0.165780137 | 0.165780137 | -4.667316616 |
| 1452787_a_at | 0.20352051   | 11.24423596 | 1.502401804  | 0.165805592 | 0.165805592 | -4.667430744 |
| 1451836_at   | -0.139680743 | 5.861271375 | -1.502390225 | 0.16580853  | 0.16580853  | -4.667443916 |
| 1439603_at   | -0.114810471 | 4.670487919 | -1.502324058 | 0.16582532  | 0.16582532  | -4.667519183 |
| 1418670_s_at | -0.185784579 | 8.180087237 | -1.502217803 | 0.165852286 | 0.165852286 | -4.667640046 |
| 1433039_at   | -0.135693184 | 4.820218354 | -1.502213298 | 0.165853429 | 0.165853429 | -4.667645171 |
| 1425735_at   | 0.116245355  | 5.650437449 | 1.502201512  | 0.165856421 | 0.165856421 | -4.667658577 |

|              |              |             |              |             |             |              |
|--------------|--------------|-------------|--------------|-------------|-------------|--------------|
| 1418581_a_at | 0.123703612  | 8.386462491 | 1.501957029  | 0.165918482 | 0.165918482 | -4.667936653 |
| 1457211_at   | 0.190377328  | 4.098133674 | 1.501834845  | 0.165949506 | 0.165949506 | -4.668075617 |
| 1438346_at   | -0.138067461 | 3.321143435 | -1.501797523 | 0.165958984 | 0.165958984 | -4.668118063 |
| 1451393_at   | 0.114126327  | 7.866754626 | 1.501787146  | 0.165961619 | 0.165961619 | -4.668129865 |
| 1428222_at   | 0.113744832  | 6.807702877 | 1.501777494  | 0.16596407  | 0.16596407  | -4.668140841 |
| 1443626_at   | -0.125424222 | 4.679523034 | -1.501698499 | 0.165984132 | 0.165984132 | -4.66823068  |
| 1445997_at   | -0.1188843   | 3.402090303 | -1.50168495  | 0.165987574 | 0.165987574 | -4.668246089 |
| 1447054_at   | 0.138921948  | 3.477451318 | 1.501681237  | 0.165988517 | 0.165988517 | -4.668250312 |
| 1443087_at   | -0.241499912 | 5.852526986 | -1.501473362 | 0.166041321 | 0.166041321 | -4.668486706 |
| 1449581_at   | -0.137981456 | 8.515929994 | -1.501439932 | 0.166049814 | 0.166049814 | -4.66852472  |
| 1455810_a_at | -0.128626549 | 6.664134311 | -1.501396691 | 0.1660608   | 0.1660608   | -4.668573891 |
| 1428991_at   | -0.108800505 | 4.339164316 | -1.501343005 | 0.166074442 | 0.166074442 | -4.668634938 |
| 1444368_at   | 0.142479279  | 3.928323721 | 1.501314497  | 0.166081686 | 0.166081686 | -4.668667354 |
| 1430041_at   | 0.123363909  | 6.926105198 | 1.501306612  | 0.166083689 | 0.166083689 | -4.668676321 |
| 1444624_at   | 0.187111095  | 6.207900328 | 1.501276927  | 0.166091233 | 0.166091233 | -4.668710074 |
| 1416898_a_at | -0.131828269 | 7.262955068 | -1.501172583 | 0.166117751 | 0.166117751 | -4.668828718 |
| 1428132_at   | 0.10035653   | 7.971424386 | 1.501013965  | 0.166158069 | 0.166158069 | -4.669009066 |
| 1448033_at   | 0.115879203  | 7.287082344 | 1.500953023  | 0.166173562 | 0.166173562 | -4.669078354 |
| 1425263_a_at | 0.189169821  | 5.714944962 | 1.500911903  | 0.166184016 | 0.166184016 | -4.669125104 |
| 1454941_at   | 0.108774194  | 8.471462399 | 1.500901818  | 0.16618658  | 0.16618658  | -4.66913657  |
| 1420453_at   | -0.125009133 | 4.108122623 | -1.500861228 | 0.166196901 | 0.166196901 | -4.669182717 |
| 1456146_at   | 0.156758913  | 6.762753792 | 1.500847555  | 0.166200377 | 0.166200377 | -4.669198262 |
| 1427311_at   | 0.317095386  | 4.823295387 | 1.500838539  | 0.16620267  | 0.16620267  | -4.669208512 |
| 1436513_at   | -0.150078989 | 8.083884662 | -1.500794705 | 0.166213816 | 0.166213816 | -4.669258346 |
| 1444066_at   | 0.168684417  | 5.610647922 | 1.500668566  | 0.166245894 | 0.166245894 | -4.669401745 |
| 1455275_at   | -0.090838796 | 5.629950266 | -1.500556708 | 0.166274345 | 0.166274345 | -4.669528904 |
| 1429473_at   | 0.13382115   | 7.50979022  | 1.500538438  | 0.166278992 | 0.166278992 | -4.669549673 |
| 1455183_at   | 0.119044343  | 7.345193125 | 1.500338439  | 0.166329873 | 0.166329873 | -4.669777016 |
| 1424178_at   | -0.20713636  | 5.344228231 | -1.500306223 | 0.166338071 | 0.166338071 | -4.669813634 |
| 1437487_at   | 0.157656612  | 5.217745048 | 1.500084426  | 0.166394516 | 0.166394516 | -4.670065733 |
| 1421938_at   | 0.161668827  | 6.463373337 | 1.50004058   | 0.166405676 | 0.166405676 | -4.670115566 |
| 1446016_at   | -0.135031108 | 4.182770477 | -1.500032188 | 0.166407812 | 0.166407812 | -4.670125104 |
| 1456007_at   | -0.108185941 | 5.170977173 | -1.500022727 | 0.166410221 | 0.166410221 | -4.670135856 |
| 1428284_at   | 0.110565583  | 8.129269033 | 1.499921218  | 0.166436062 | 0.166436062 | -4.670251224 |
| 1436628_at   | -0.18393953  | 5.741068289 | -1.49991408  | 0.166437879 | 0.166437879 | -4.670259336 |
| 1460360_at   | -0.183444681 | 7.655796868 | -1.499853721 | 0.166453246 | 0.166453246 | -4.670327933 |
| 1416003_at   | 0.267349349  | 5.829663251 | 1.499817989  | 0.166462344 | 0.166462344 | -4.670368541 |
| 1458822_at   | -0.10676858  | 4.297920845 | -1.499805693 | 0.166465475 | 0.166465475 | -4.670382515 |
| 1454446_at   | -0.149466627 | 4.938532994 | -1.499803956 | 0.166465917 | 0.166465917 | -4.67038449  |
| 1421867_at   | 0.110625438  | 9.362314046 | 1.499465794  | 0.166552041 | 0.166552041 | -4.670768769 |
| 1449602_at   | 0.13564159   | 5.024610185 | 1.499395892  | 0.166569848 | 0.166569848 | -4.670848199 |
| 1451821_a_at | -0.119594048 | 3.909713255 | -1.499346415 | 0.166582454 | 0.166582454 | -4.670904418 |
| 1418183_a_at | 0.104279384  | 7.590159746 | 1.499339073  | 0.166584324 | 0.166584324 | -4.67091276  |
| 1423896_a_at | 0.100711735  | 11.33642487 | 1.499165403  | 0.166628578 | 0.166628578 | -4.671110088 |
| 1430895_at   | 0.104461407  | 3.440945586 | 1.499126949  | 0.166638377 | 0.166638377 | -4.671153777 |
| 1450750_a_at | -0.17842002  | 6.48807029  | -1.499084232 | 0.166649264 | 0.166649264 | -4.671202311 |
| 1456191_x_at | 0.108946053  | 5.968513695 | 1.498750206  | 0.166734417 | 0.166734417 | -4.67158179  |
| 1426826_at   | 0.114928392  | 8.342831622 | 1.498543855  | 0.16678704  | 0.16678704  | -4.671816198 |
| 1460315_s_at | 0.154533556  | 9.570512913 | 1.498389305  | 0.166826463 | 0.166826463 | -4.671991749 |
| 1426605_at   | 0.176989872  | 3.892758206 | 1.498243582  | 0.166863641 | 0.166863641 | -4.672157264 |
| 1450510_a_at | 0.114320834  | 5.075181958 | 1.498236819  | 0.166865367 | 0.166865367 | -4.672164945 |
| 1444931_at   | -0.136174356 | 3.635686919 | -1.498217188 | 0.166870376 | 0.166870376 | -4.672187242 |
| 1426045_at   | -0.158119648 | 4.045056994 | -1.498131886 | 0.166892143 | 0.166892143 | -4.672284126 |

|              |              |             |              |             |             |              |
|--------------|--------------|-------------|--------------|-------------|-------------|--------------|
| 1440509_at   | 0.121747395  | 3.344784597 | 1.498105751  | 0.166898813 | 0.166898813 | -4.672313807 |
| 1432277_at   | 0.107173847  | 5.29814674  | 1.497938398  | 0.166941527 | 0.166941527 | -4.67250387  |
| 1444514_at   | -0.174540598 | 3.707052959 | -1.497924156 | 0.166945162 | 0.166945162 | -4.672520045 |
| 1432061_at   | -0.13080524  | 3.713703684 | -1.497878268 | 0.166956876 | 0.166956876 | -4.672572157 |
| 1432230_at   | -0.126412565 | 5.773914355 | -1.497839606 | 0.166966746 | 0.166966746 | -4.672616064 |
| 1460385_a_at | 0.163086025  | 5.490012406 | 1.497759227  | 0.166987267 | 0.166987267 | -4.672707341 |
| 1435868_at   | 0.144422173  | 5.922580078 | 1.497729732  | 0.166994798 | 0.166994798 | -4.672740836 |
| 1449484_at   | -0.119612861 | 4.981060489 | -1.497376515 | 0.167085007 | 0.167085007 | -4.673141914 |
| 1426206_at   | -0.133690899 | 6.286799764 | -1.497251311 | 0.167116994 | 0.167116994 | -4.673284071 |
| 1436695_x_at | 0.124573847  | 6.90898386  | 1.497081226  | 0.167160455 | 0.167160455 | -4.673477176 |
| 1458796_at   | 0.094154765  | 3.79518587  | 1.496894529  | 0.167208172 | 0.167208172 | -4.673689126 |
| 1454321_at   | -0.170420435 | 3.800803794 | -1.496642394 | 0.167272633 | 0.167272633 | -4.673975342 |
| 1420069_at   | 0.110310328  | 3.272416367 | 1.496518801  | 0.167304238 | 0.167304238 | -4.674115631 |
| 1422557_s_at | -0.295844303 | 8.374126258 | -1.496316107 | 0.167356083 | 0.167356083 | -4.674345692 |
| 1430117_a_at | 0.099105065  | 6.712970224 | 1.496275153  | 0.16736656  | 0.16736656  | -4.674392175 |
| 1448212_at   | -0.101366517 | 9.672713476 | -1.495992476 | 0.167438891 | 0.167438891 | -4.674712985 |
| 1454771_at   | -0.101643886 | 7.003823187 | -1.495896188 | 0.167463535 | 0.167463535 | -4.674822256 |
| 1439981_at   | -0.112200592 | 4.334279007 | -1.495600709 | 0.167539181 | 0.167539181 | -4.675157547 |
| 1429269_at   | 0.235342789  | 5.80959958  | 1.495596147  | 0.167540349 | 0.167540349 | -4.675162723 |
| 1458957_at   | -0.149677885 | 5.730017079 | -1.495375774 | 0.167596786 | 0.167596786 | -4.675412764 |
| 1456685_at   | -0.134191257 | 3.828688349 | -1.495238813 | 0.16763187  | 0.16763187  | -4.675568154 |
| 1459753_x_at | 0.114462052  | 3.842234255 | 1.495135831  | 0.167658254 | 0.167658254 | -4.675684987 |
| 1447981_at   | -0.171654938 | 3.772065795 | -1.495107168 | 0.167665598 | 0.167665598 | -4.675717504 |
| 1442695_at   | -0.178611252 | 3.727989588 | -1.495103522 | 0.167666533 | 0.167666533 | -4.67572164  |
| 1424163_at   | 0.092645825  | 8.099110341 | 1.495099712  | 0.167667509 | 0.167667509 | -4.675725963 |
| 1436251_at   | -0.142338091 | 4.977409494 | -1.49505127  | 0.167679922 | 0.167679922 | -4.675780918 |
| 1435387_at   | -0.110079775 | 8.174316377 | -1.495046654 | 0.167681104 | 0.167681104 | -4.675786155 |
| 1426540_at   | 0.121141943  | 6.508309114 | 1.495044448  | 0.16768167  | 0.16768167  | -4.675788658 |
| 1424680_at   | -0.173255917 | 5.11954032  | -1.494980483 | 0.167698062 | 0.167698062 | -4.675861221 |
| 1443019_at   | 0.140856809  | 3.45574541  | 1.494927151  | 0.167711729 | 0.167711729 | -4.675921721 |
| 1429006_s_at | 0.1117121    | 7.896050804 | 1.494739066  | 0.16775994  | 0.16775994  | -4.676135076 |
| 1446201_at   | 0.168682866  | 5.756844437 | 1.49473232   | 0.167761669 | 0.167761669 | -4.676142728 |
| 1437739_a_at | -0.103889267 | 5.8720414   | -1.494718602 | 0.167765186 | 0.167765186 | -4.676158289 |
| 1459411_at   | -0.122425892 | 5.93352978  | -1.494398894 | 0.167847165 | 0.167847165 | -4.676520913 |
| 1434739_at   | -0.102993703 | 4.140518273 | -1.494275149 | 0.167878904 | 0.167878904 | -4.676661256 |
| 1420235_at   | 0.127444846  | 3.331378198 | 1.494194764  | 0.167899525 | 0.167899525 | -4.676752421 |
| 1422959_s_at | 0.120531888  | 8.315329041 | 1.494173808  | 0.167904901 | 0.167904901 | -4.676776187 |
| 1432081_at   | -0.118589462 | 4.271393911 | -1.494161232 | 0.167908128 | 0.167908128 | -4.676790449 |
| 1443080_at   | 0.118883247  | 4.1389775   | 1.494012523  | 0.167946283 | 0.167946283 | -4.67695909  |
| 1458600_at   | 0.140429524  | 4.709990348 | 1.493907212  | 0.167973308 | 0.167973308 | -4.677078511 |
| 1425360_at   | 0.136896998  | 5.276305852 | 1.493842645  | 0.16798988  | 0.16798988  | -4.677151727 |
| 1431163_at   | -0.122821098 | 6.263588482 | -1.493796824 | 0.168001641 | 0.168001641 | -4.677203684 |
| 1454371_at   | -0.108316331 | 4.834953848 | -1.493783018 | 0.168005184 | 0.168005184 | -4.677219339 |
| 1432372_a_at | -0.113377975 | 6.935148134 | -1.49369745  | 0.168027149 | 0.168027149 | -4.677316364 |
| 1439874_at   | -0.206407977 | 4.568684739 | -1.493551164 | 0.168064706 | 0.168064706 | -4.677482229 |
| 1452266_at   | 0.124319998  | 8.494793549 | 1.49336621   | 0.168112201 | 0.168112201 | -4.677691924 |
| 1443733_x_at | 0.15820147   | 7.561292668 | 1.493322475  | 0.168123434 | 0.168123434 | -4.677741506 |
| 1452635_x_at | 0.15116492   | 7.666686592 | 1.493314917  | 0.168125375 | 0.168125375 | -4.677750075 |
| 1447382_at   | -0.16283521  | 4.240985747 | -1.493285364 | 0.168132966 | 0.168132966 | -4.677783579 |
| 1432733_at   | 0.136304579  | 4.003251141 | 1.493246448  | 0.168142962 | 0.168142962 | -4.677827698 |
| 1453627_at   | 0.213097992  | 4.024298741 | 1.493221761  | 0.168149303 | 0.168149303 | -4.677855685 |
| 1423631_at   | 0.140593097  | 4.88444343  | 1.493203187  | 0.168154074 | 0.168154074 | -4.677876742 |
| 1441982_at   | -0.119285397 | 3.614176113 | -1.493083556 | 0.168184808 | 0.168184808 | -4.67801236  |

|              |              |             |              |             |             |              |
|--------------|--------------|-------------|--------------|-------------|-------------|--------------|
| 1434275_at   | 0.11161033   | 6.893795242 | 1.492881486  | 0.168236731 | 0.168236731 | -4.67824142  |
| 1421214_at   | -0.138720453 | 3.609715386 | -1.492881169 | 0.168236813 | 0.168236813 | -4.678241779 |
| 1434143_at   | 0.106260503  | 7.404910241 | 1.49280764   | 0.16825571  | 0.16825571  | -4.678325124 |
| 1438196_at   | -0.134644234 | 6.117057306 | -1.492792884 | 0.168259503 | 0.168259503 | -4.678341851 |
| 1448291_at   | -0.38955879  | 7.916754722 | -1.492740729 | 0.168272908 | 0.168272908 | -4.678400967 |
| 1459624_at   | 0.113054905  | 3.983486919 | 1.492736417  | 0.168274016 | 0.168274016 | -4.678405855 |
| 1423363_at   | -0.151120465 | 6.743585732 | -1.492720264 | 0.168278169 | 0.168278169 | -4.678424164 |
| 1450413_at   | 0.127868772  | 5.39242349  | 1.492689953  | 0.16828596  | 0.16828596  | -4.678458519 |
| 1449073_at   | -0.180244245 | 7.324372144 | -1.492685204 | 0.168287181 | 0.168287181 | -4.678463902 |
| 1451956_a_at | 0.195052575  | 8.009168935 | 1.492505504  | 0.168333338 | 0.168333338 | -4.678667575 |
| 1444684_at   | 0.144756149  | 3.653574266 | 1.492417847  | 0.168355919 | 0.168355919 | -4.67876692  |
| 1442188_at   | -0.115237085 | 4.842335356 | -1.492331685 | 0.168378077 | 0.168378077 | -4.678864569 |
| 1433498_at   | -0.107612848 | 8.070420717 | -1.492115397 | 0.168433711 | 0.168433711 | -4.679109676 |
| 1425189_a_at | 0.0913384    | 9.204070728 | 1.492034514  | 0.168454519 | 0.168454519 | -4.679201331 |
| 1421993_a_at | -0.135733655 | 6.443063353 | -1.491997043 | 0.16846416  | 0.16846416  | -4.679243792 |
| 1452342_at   | 0.096765732  | 8.970369258 | 1.491963203  | 0.168472867 | 0.168472867 | -4.679282138 |
| 1448255_a_at | -0.144131355 | 10.34240771 | -1.491670744 | 0.168548134 | 0.168548134 | -4.679613514 |
| 1435979_a_at | -0.101771286 | 4.682139435 | -1.491566586 | 0.168574947 | 0.168574947 | -4.679731524 |
| 1420544_at   | -0.131785167 | 3.464728268 | -1.491537788 | 0.168582361 | 0.168582361 | -4.679764151 |
| 1418963_at   | 0.102612118  | 8.407480088 | 1.491481917  | 0.168596745 | 0.168596745 | -4.679827449 |
| 1446879_at   | -0.130279801 | 3.979435799 | -1.491471256 | 0.16859949  | 0.16859949  | -4.679839527 |
| 1425716_s_at | -0.165862604 | 4.546084113 | -1.491427764 | 0.168610689 | 0.168610689 | -4.6798888   |
| 1459793_s_at | 0.146812718  | 7.102766989 | 1.491354023  | 0.168629677 | 0.168629677 | -4.679972342 |
| 1432518_at   | 0.097889703  | 3.846708908 | 1.491277485  | 0.168649388 | 0.168649388 | -4.680059047 |
| 1439144_at   | -0.115016385 | 5.567939087 | -1.491109145 | 0.168692748 | 0.168692748 | -4.680249744 |
| 1443454_at   | -0.114928671 | 5.084131528 | -1.490902205 | 0.168746063 | 0.168746063 | -4.680484151 |
| 1452747_at   | 0.102074813  | 6.377158675 | 1.4908151    | 0.168768509 | 0.168768509 | -4.680582812 |
| 1423089_at   | 0.143925256  | 8.695920044 | 1.490786976  | 0.168775756 | 0.168775756 | -4.680614667 |
| 1428276_at   | -0.104706879 | 4.026330682 | -1.490601332 | 0.168823605 | 0.168823605 | -4.680824925 |
| 1458398_at   | -0.102180253 | 4.408649709 | -1.490493247 | 0.168851468 | 0.168851468 | -4.680947335 |
| 1446542_at   | -0.113416297 | 4.603058502 | -1.490402207 | 0.168874941 | 0.168874941 | -4.681050438 |
| 1439877_at   | -0.12437726  | 7.132162245 | -1.490208842 | 0.168924806 | 0.168924806 | -4.68126941  |
| 1431746_a_at | 0.099668795  | 10.09569313 | 1.489992614  | 0.168980581 | 0.168980581 | -4.681514254 |
| 1446575_at   | 0.119724221  | 3.967816197 | 1.48987523   | 0.169010866 | 0.169010866 | -4.681647164 |
| 1439783_at   | 0.138562731  | 6.502176237 | 1.489866239  | 0.169013186 | 0.169013186 | -4.681657345 |
| 1432085_at   | -0.108952605 | 4.18858096  | -1.489625716 | 0.169075258 | 0.169075258 | -4.681929662 |
| 1421183_at   | -0.19210377  | 4.196196038 | -1.489566026 | 0.169090665 | 0.169090665 | -4.68199724  |
| 1418195_at   | 0.10553877   | 8.480760759 | 1.489548951  | 0.169095073 | 0.169095073 | -4.68201657  |
| 1442224_at   | -0.141477933 | 4.072670171 | -1.489425678 | 0.169126897 | 0.169126897 | -4.682156126 |
| 1459056_at   | -0.145577399 | 4.390423776 | -1.489231574 | 0.169177017 | 0.169177017 | -4.682375854 |
| 1457131_at   | -0.160504382 | 4.323960064 | -1.489046246 | 0.169224883 | 0.169224883 | -4.682585633 |
| 1453618_at   | 0.109762625  | 3.831900732 | 1.488904939  | 0.169261388 | 0.169261388 | -4.682745573 |
| 1420852_a_at | 0.115660703  | 6.020820822 | 1.488902445  | 0.169262032 | 0.169262032 | -4.682748395 |
| 1458278_at   | 0.123582134  | 3.663185595 | 1.488873923  | 0.169269401 | 0.169269401 | -4.682780677 |
| 1432790_at   | 0.190798113  | 3.872643909 | 1.488630594  | 0.16933228  | 0.16933228  | -4.68305607  |
| 1455165_at   | 0.184285891  | 6.349479103 | 1.488351221  | 0.169404498 | 0.169404498 | -4.683372223 |
| 1421452_at   | -0.102682235 | 5.358747559 | -1.488330777 | 0.169409784 | 0.169409784 | -4.683395358 |
| 1422556_at   | 0.130408567  | 8.347896542 | 1.488254638  | 0.169429472 | 0.169429472 | -4.683481515 |
| 1448404_at   | -0.119148703 | 8.424116122 | -1.487912266 | 0.169518023 | 0.169518023 | -4.683868903 |
| 1427898_at   | -0.134571946 | 8.501101699 | -1.487800543 | 0.169546928 | 0.169546928 | -4.683995304 |
| 1457653_at   | -0.132528519 | 5.984312464 | -1.487792588 | 0.169548986 | 0.169548986 | -4.684004304 |
| 1458728_at   | -0.166143617 | 3.558570021 | -1.487728325 | 0.169565615 | 0.169565615 | -4.684077008 |
| 1423790_at   | -0.133201847 | 10.65209377 | -1.487575781 | 0.169605092 | 0.169605092 | -4.68424958  |



|              |              |             |              |             |             |              |
|--------------|--------------|-------------|--------------|-------------|-------------|--------------|
| 1432054_at   | 0.298890335  | 6.09420789  | 1.487530894  | 0.16961671  | 0.16961671  | -4.684300359 |
| 1441320_a_at | 0.094152644  | 6.858412782 | 1.487429378  | 0.169642987 | 0.169642987 | -4.684415196 |
| 1460235_at   | -0.116404637 | 7.311154066 | -1.487417911 | 0.169645955 | 0.169645955 | -4.684428168 |
| 1454484_at   | 0.10885404   | 3.935219942 | 1.487395422  | 0.169651777 | 0.169651777 | -4.684453607 |
| 1444586_at   | -0.127396104 | 3.813987445 | -1.487159857 | 0.16971277  | 0.16971277  | -4.684720064 |
| 1424713_at   | -0.11671906  | 8.667336676 | -1.487156326 | 0.169713684 | 0.169713684 | -4.684724058 |
| 1434250_at   | 0.093875133  | 6.716843703 | 1.487032487  | 0.169745756 | 0.169745756 | -4.684864127 |
| 1454424_at   | 0.187219098  | 7.347758742 | 1.487031644  | 0.169745975 | 0.169745975 | -4.684865081 |
| 1426330_at   | -0.097099174 | 4.322970904 | -1.486984228 | 0.169758256 | 0.169758256 | -4.684918709 |
| 1459135_at   | -0.127329962 | 5.003811079 | -1.486592143 | 0.169859841 | 0.169859841 | -4.685362129 |
| 1453227_at   | -0.120322962 | 6.903602142 | -1.486369552 | 0.169917535 | 0.169917535 | -4.685613835 |
| 1451039_at   | -0.127557819 | 8.085843881 | -1.486336842 | 0.169926015 | 0.169926015 | -4.685650821 |
| 1433368_x_at | 0.14245046   | 3.566292197 | 1.486110946  | 0.169984586 | 0.169984586 | -4.685906239 |
| 1440202_at   | 0.120992625  | 6.664575573 | 1.486060094  | 0.169997773 | 0.169997773 | -4.685963734 |
| 1416568_a_at | 0.158171385  | 9.160971823 | 1.48597181   | 0.17002067  | 0.17002067  | -4.686063548 |
| 1422874_at   | 0.201195001  | 4.55801113  | 1.485939478  | 0.170029057 | 0.170029057 | -4.686100102 |
| 1434255_at   | 0.194254435  | 5.357661314 | 1.485801795  | 0.170064772 | 0.170064772 | -4.686255758 |
| 1440889_at   | 0.1200931    | 3.732880563 | 1.485697161  | 0.170091919 | 0.170091919 | -4.686374044 |
| 1421549_at   | -0.11950347  | 3.647541432 | -1.485650629 | 0.170103993 | 0.170103993 | -4.686426647 |
| 1459579_at   | 0.162918757  | 5.144209487 | 1.485559855  | 0.170127549 | 0.170127549 | -4.68652926  |
| 1447165_at   | 0.17734643   | 5.293315482 | 1.48552945   | 0.170135439 | 0.170135439 | -4.68656363  |
| 1442752_at   | 0.123764918  | 5.777076489 | 1.485515412  | 0.170139082 | 0.170139082 | -4.686579498 |
| 1456081_a_at | 0.102372566  | 7.39321014  | 1.485458916  | 0.170153745 | 0.170153745 | -4.68664336  |
| 1439150_x_at | 0.117510045  | 4.80902191  | 1.485254015  | 0.170206934 | 0.170206934 | -4.686874963 |
| 1456980_at   | 0.158751584  | 4.902489622 | 1.485133373  | 0.170238258 | 0.170238258 | -4.687011318 |
| 1427448_at   | 0.108597073  | 7.449863024 | 1.484960586  | 0.170283129 | 0.170283129 | -4.687206599 |
| 1424596_s_at | 0.179202095  | 8.141899168 | 1.484618628  | 0.170371962 | 0.170371962 | -4.687593037 |
| 1427182_s_at | 0.16173341   | 5.49884347  | 1.484591094  | 0.170379116 | 0.170379116 | -4.68762415  |
| 1420211_at   | -0.109782753 | 3.712254222 | -1.48453443  | 0.170393841 | 0.170393841 | -4.687688179 |
| 1452693_at   | -0.094328354 | 7.40303517  | -1.484444723 | 0.170417154 | 0.170417154 | -4.687789544 |
| 1460537_at   | 0.298608715  | 5.589853011 | 1.484373971  | 0.170435543 | 0.170435543 | -4.687869486 |
| 1423557_at   | -0.146586524 | 7.844146377 | -1.484331573 | 0.170446564 | 0.170446564 | -4.687917391 |
| 1430211_at   | 0.121882606  | 4.438568112 | 1.484313375  | 0.170451294 | 0.170451294 | -4.687937953 |
| 1439004_at   | -0.12207718  | 4.578484311 | -1.484219957 | 0.170475579 | 0.170475579 | -4.688043502 |
| 1428947_at   | -0.124842348 | 5.684467107 | -1.483879962 | 0.17056399  | 0.17056399  | -4.688427613 |
| 1457023_at   | -0.112279554 | 3.368120197 | -1.483502124 | 0.170662288 | 0.170662288 | -4.68885442  |
| 1421069_at   | -0.121815425 | 4.465864105 | -1.483414253 | 0.170685155 | 0.170685155 | -4.688953671 |
| 1446196_at   | 0.279197026  | 6.069717529 | 1.483391947  | 0.17069096  | 0.17069096  | -4.688978864 |
| 1457814_at   | 0.19326871   | 5.875545922 | 1.483292182  | 0.170716927 | 0.170716927 | -4.689091545 |
| 1415826_at   | 0.170012612  | 8.633272852 | 1.483204571  | 0.170739733 | 0.170739733 | -4.689190493 |
| 1453466_at   | -0.131077856 | 3.562735856 | -1.483130697 | 0.170758966 | 0.170758966 | -4.689273925 |
| 1457962_at   | -0.116893421 | 4.827046282 | -1.482908482 | 0.170816829 | 0.170816829 | -4.689524876 |
| 1435900_at   | 0.116089063  | 8.368495161 | 1.482682782  | 0.170875616 | 0.170875616 | -4.68977974  |
| 1455575_at   | -0.164204662 | 6.005889398 | -1.482493962 | 0.170924812 | 0.170924812 | -4.689992943 |
| 1457540_at   | 0.109361443  | 5.795811964 | 1.482481518  | 0.170928054 | 0.170928054 | -4.690006993 |
| 1458924_at   | -0.14565825  | 4.933317225 | -1.482437663 | 0.170939482 | 0.170939482 | -4.690056508 |
| 1443275_at   | -0.13576891  | 4.969141763 | -1.482337721 | 0.170965528 | 0.170965528 | -4.690169347 |
| 1453028_at   | 0.114731695  | 8.110661656 | 1.482183656  | 0.171005686 | 0.171005686 | -4.690343286 |
| 1424318_at   | 0.100889821  | 9.477566773 | 1.482102919  | 0.171026733 | 0.171026733 | -4.690434432 |
| 1421048_a_at | 0.100392821  | 8.139130081 | 1.481932899  | 0.171071064 | 0.171071064 | -4.690626366 |
| 1446491_at   | 0.106474286  | 3.373236299 | 1.481884558  | 0.17108367  | 0.17108367  | -4.690680934 |
| 1440381_at   | 0.116646184  | 8.018052318 | 1.481827161  | 0.171098639 | 0.171098639 | -4.690745725 |
| 1436392_s_at | 0.422732493  | 6.655710964 | 1.481729318  | 0.171124159 | 0.171124159 | -4.690856169 |

|              |              |             |              |             |             |              |
|--------------|--------------|-------------|--------------|-------------|-------------|--------------|
| 1434118_at   | -0.225412579 | 5.406368469 | -1.481719366 | 0.171126755 | 0.171126755 | -4.690867402 |
| 1438738_at   | -0.08928149  | 4.624257415 | -1.481710075 | 0.171129178 | 0.171129178 | -4.69087789  |
| 1435029_at   | 0.117115798  | 8.946529835 | 1.481660213  | 0.171142185 | 0.171142185 | -4.69093417  |
| 1437373_at   | -0.184971154 | 6.306600909 | -1.481652481 | 0.171144202 | 0.171144202 | -4.690942897 |
| 1420986_s_at | -0.105971392 | 6.672532885 | -1.481293618 | 0.171237839 | 0.171237839 | -4.691347929 |
| 1453789_at   | -0.130023829 | 4.112592872 | -1.481208232 | 0.171260125 | 0.171260125 | -4.691444291 |
| 1440126_at   | -0.148221306 | 4.132676573 | -1.481204143 | 0.171261192 | 0.171261192 | -4.691448906 |
| 1436398_at   | 0.441747881  | 5.883411406 | 1.481160856  | 0.171272491 | 0.171272491 | -4.691497757 |
| 1438550_x_at | 0.141406109  | 4.035682396 | 1.481144506  | 0.171276759 | 0.171276759 | -4.691516207 |
| 1442391_at   | 0.108000869  | 3.687865402 | 1.480892618  | 0.171342523 | 0.171342523 | -4.691800452 |
| 1449287_at   | -0.138615063 | 6.06324437  | -1.480676203 | 0.171399044 | 0.171399044 | -4.692044645 |
| 1442408_at   | 0.101869805  | 9.029340836 | 1.480327943  | 0.171490031 | 0.171490031 | -4.692437563 |
| 1447698_x_at | -0.145273945 | 3.086072607 | -1.480250555 | 0.171510256 | 0.171510256 | -4.692524867 |
| 1436148_at   | -0.101384233 | 3.329459729 | -1.480115882 | 0.171545456 | 0.171545456 | -4.692676791 |
| 1419247_at   | 0.175916866  | 8.515962152 | 1.480033632  | 0.171566957 | 0.171566957 | -4.692769573 |
| 1458446_at   | 0.137724624  | 4.231321547 | 1.479960101  | 0.171586181 | 0.171586181 | -4.692852517 |
| 1418640_at   | 0.160023489  | 8.283869129 | 1.479825687  | 0.171621327 | 0.171621327 | -4.693004133 |
| 1451678_at   | -0.116593348 | 8.464708314 | -1.479805574 | 0.171626586 | 0.171626586 | -4.693026819 |
| 1447014_at   | -0.142781664 | 6.727765025 | -1.479790417 | 0.17163055  | 0.17163055  | -4.693043914 |
| 1450247_a_at | 0.158186882  | 5.948702848 | 1.479780653  | 0.171633104 | 0.171633104 | -4.693054928 |
| 1450114_at   | -0.109449428 | 6.843545298 | -1.479652882 | 0.17166652  | 0.17166652  | -4.69319904  |
| 1421929_at   | 0.110588088  | 9.085519747 | 1.479624461  | 0.171673954 | 0.171673954 | -4.693231095 |
| 1432200_at   | -0.164053089 | 4.173186312 | -1.47961953  | 0.171675244 | 0.171675244 | -4.693236656 |
| 1455313_at   | -0.122835906 | 5.279505183 | -1.479595633 | 0.171681495 | 0.171681495 | -4.693263608 |
| 1441624_at   | 0.18961927   | 5.644383093 | 1.479436781  | 0.171723051 | 0.171723051 | -4.693442763 |
| 1445043_at   | -0.118612589 | 3.814488083 | -1.479176446 | 0.171791176 | 0.171791176 | -4.693736347 |
| 1458411_at   | -0.100343968 | 3.794952765 | -1.479029392 | 0.171829667 | 0.171829667 | -4.693902169 |
| 1424373_at   | -0.094171705 | 10.20136497 | -1.478958174 | 0.171848311 | 0.171848311 | -4.693982474 |
| 1457914_at   | 0.109545532  | 7.153502831 | 1.478890204  | 0.171866106 | 0.171866106 | -4.694059114 |
| 1438959_x_at | -0.135923134 | 7.503547561 | -1.478759387 | 0.17190036  | 0.17190036  | -4.694206611 |
| 1451534_at   | -0.118583468 | 5.565639952 | -1.478679901 | 0.171921176 | 0.171921176 | -4.694296229 |
| 1446108_at   | 0.124667256  | 3.981888619 | 1.478546013  | 0.171956244 | 0.171956244 | -4.694447177 |
| 1436212_at   | 0.117367344  | 3.693732937 | 1.478543991  | 0.171956774 | 0.171956774 | -4.694449456 |
| 1457494_at   | 0.137542772  | 3.269327779 | 1.478450435  | 0.171981282 | 0.171981282 | -4.694554928 |
| 1450591_at   | -0.126869776 | 4.047382111 | -1.478425634 | 0.171987779 | 0.171987779 | -4.694582887 |
| 1433277_at   | 0.143989641  | 3.613997833 | 1.478349343  | 0.172007767 | 0.172007767 | -4.694668891 |
| 1443650_at   | 0.141386781  | 3.878828104 | 1.478348349  | 0.172008028 | 0.172008028 | -4.694670012 |
| 1434439_at   | 0.124075649  | 6.863141635 | 1.478224099  | 0.172040585 | 0.172040585 | -4.694810076 |
| 1431966_at   | -0.109707281 | 5.028852675 | -1.478196232 | 0.172047888 | 0.172047888 | -4.69484149  |
| 1435000_at   | 0.094105667  | 9.031792562 | 1.478101827  | 0.17207263  | 0.17207263  | -4.694947904 |
| 1420481_at   | 0.129837097  | 7.289410402 | 1.478024932  | 0.172092785 | 0.172092785 | -4.695034579 |
| 1440661_at   | 0.093565376  | 3.608471816 | 1.477958988  | 0.172110072 | 0.172110072 | -4.695108908 |
| 1460531_at   | -0.186133757 | 5.599374462 | -1.477944875 | 0.172113771 | 0.172113771 | -4.695124814 |
| 1429175_at   | 0.14548453   | 5.461610363 | 1.477811508  | 0.172148737 | 0.172148737 | -4.695275133 |
| 1421022_x_at | -0.18569819  | 8.747717936 | -1.477769688 | 0.172159702 | 0.172159702 | -4.695322267 |
| 1450325_at   | 0.131539301  | 4.382995722 | 1.477712524  | 0.172174692 | 0.172174692 | -4.695386692 |
| 1454903_at   | -0.113089564 | 8.27150392  | -1.477634783 | 0.172195079 | 0.172195079 | -4.695474307 |
| 1451540_at   | -0.090307366 | 7.980833582 | -1.477546101 | 0.172218338 | 0.172218338 | -4.695574251 |
| 1442395_at   | 0.113737976  | 5.431413313 | 1.477447369  | 0.172244237 | 0.172244237 | -4.695685515 |
| 1424484_at   | 0.098716642  | 8.869580669 | 1.477422838  | 0.172250672 | 0.172250672 | -4.695713159 |
| 1456396_at   | 0.100469852  | 9.045237071 | 1.477228725  | 0.172301601 | 0.172301601 | -4.695931898 |
| 1429149_at   | 0.116269879  | 7.226867155 | 1.477203838  | 0.172308131 | 0.172308131 | -4.695959941 |
| 1441085_at   | 0.127179761  | 5.843535622 | 1.477124295  | 0.172329005 | 0.172329005 | -4.696049569 |

|              |              |             |              |             |             |              |
|--------------|--------------|-------------|--------------|-------------|-------------|--------------|
| 1453527_a_at | -0.126614913 | 4.402881141 | -1.476990977 | 0.172363996 | 0.172363996 | -4.696199784 |
| 1447853_x_at | 0.280212663  | 5.831727721 | 1.476835586  | 0.172404788 | 0.172404788 | -4.696374862 |
| 1449872_at   | -0.288013439 | 5.803161574 | -1.476830022 | 0.172406249 | 0.172406249 | -4.69638113  |
| 1439030_at   | -0.129157259 | 7.882835733 | -1.476764413 | 0.172423475 | 0.172423475 | -4.696455048 |
| 1454491_at   | 0.10467513   | 4.663921784 | 1.47671516   | 0.172436407 | 0.172436407 | -4.696510537 |
| 1458383_at   | -0.133629606 | 7.013185549 | -1.476571338 | 0.172474176 | 0.172474176 | -4.696672562 |
| 1445776_at   | -0.109354747 | 4.472962234 | -1.47655467  | 0.172478553 | 0.172478553 | -4.696691339 |
| 1447158_at   | -0.098515316 | 3.510375381 | -1.47639568  | 0.172520314 | 0.172520314 | -4.69687044  |
| 1440728_at   | -0.252812814 | 5.723895204 | -1.476388496 | 0.172522201 | 0.172522201 | -4.696878532 |
| 1427421_at   | -0.14811129  | 3.725287702 | -1.476308706 | 0.172543163 | 0.172543163 | -4.696968411 |
| 1418175_at   | -0.140581787 | 5.683420017 | -1.476204906 | 0.172570435 | 0.172570435 | -4.697085332 |
| 1419592_at   | -0.132299727 | 7.174185498 | -1.476165641 | 0.172580753 | 0.172580753 | -4.697129558 |
| 1428440_at   | 0.106832983  | 8.426603881 | 1.476127238  | 0.172590844 | 0.172590844 | -4.697172814 |
| 1417464_at   | -0.85553259  | 8.245486722 | -1.476119279 | 0.172592935 | 0.172592935 | -4.697181778 |
| 1423515_at   | 0.220224487  | 5.271022002 | 1.476000755  | 0.172624085 | 0.172624085 | -4.697315274 |
| 1429024_at   | -0.165302458 | 5.797881735 | -1.475988369 | 0.17262734  | 0.17262734  | -4.697329223 |
| 1429150_at   | -0.114802315 | 7.790850742 | -1.475686481 | 0.172706702 | 0.172706702 | -4.697669216 |
| 1444383_at   | -0.129883593 | 5.635446429 | -1.475626608 | 0.172722446 | 0.172722446 | -4.69773664  |
| 1438262_at   | -0.150732117 | 4.037794497 | -1.475501259 | 0.17275541  | 0.17275541  | -4.697877796 |
| 1432108_at   | 0.142221846  | 6.866008618 | 1.475422455  | 0.172776137 | 0.172776137 | -4.697966534 |
| 1451355_at   | 0.161652685  | 6.555914836 | 1.475377214  | 0.172788037 | 0.172788037 | -4.698017476 |
| 1459309_at   | 0.119153473  | 3.579844086 | 1.475264973  | 0.172817564 | 0.172817564 | -4.698143859 |
| 1427090_at   | 0.10654458   | 7.567503528 | 1.4751535    | 0.172846893 | 0.172846893 | -4.698269372 |
| 1440533_at   | 0.166060218  | 7.09684586  | 1.475073368  | 0.172867979 | 0.172867979 | -4.698359593 |
| 1419738_a_at | 0.131350615  | 10.54991369 | 1.475002547  | 0.172886616 | 0.172886616 | -4.698439328 |
| 1453602_at   | -0.143456101 | 3.894736816 | -1.474934965 | 0.172904403 | 0.172904403 | -4.698515415 |
| 1418235_at   | -0.133714392 | 6.482545211 | -1.474718006 | 0.172961515 | 0.172961515 | -4.698759663 |
| 1418393_a_at | -0.184302236 | 5.52797145  | -1.47469078  | 0.172968684 | 0.172968684 | -4.698790313 |
| 1453840_at   | 0.178298621  | 7.190761298 | 1.474675071  | 0.172972819 | 0.172972819 | -4.698807996 |
| 1451522_s_at | -0.140164566 | 8.066118429 | -1.474629807 | 0.172984738 | 0.172984738 | -4.698858951 |
| 1424770_at   | 0.100890806  | 11.08841819 | 1.474627784  | 0.17298527  | 0.17298527  | -4.698861228 |
| 1424663_at   | 0.095852707  | 7.927938619 | 1.474560886  | 0.173002886 | 0.173002886 | -4.698936533 |
| 1429340_at   | -0.145811004 | 4.220192818 | -1.474486442 | 0.17302249  | 0.17302249  | -4.699020331 |
| 1420226_x_at | -0.104122392 | 3.147348196 | -1.474421046 | 0.173039713 | 0.173039713 | -4.699093942 |
| 1446261_at   | -0.127034431 | 3.206705629 | -1.474090887 | 0.17312669  | 0.17312669  | -4.699465548 |
| 1449876_at   | 0.243824066  | 6.498414473 | 1.474083471  | 0.173128644 | 0.173128644 | -4.699473894 |
| 1457060_at   | -0.122653936 | 5.868446329 | -1.47370069  | 0.173229531 | 0.173229531 | -4.699904666 |
| 1437813_at   | 0.167884973  | 5.40786758  | 1.473694994  | 0.173231033 | 0.173231033 | -4.699911076 |
| 1430694_at   | 0.125137321  | 5.443289362 | 1.473665571  | 0.17323879  | 0.17323879  | -4.699944185 |
| 1423114_at   | 0.105434201  | 9.58692819  | 1.473578785  | 0.173261672 | 0.173261672 | -4.700041841 |
| 1451456_at   | 0.389014398  | 6.763753021 | 1.473393884  | 0.173310432 | 0.173310432 | -4.700249893 |
| 1439174_at   | -0.111476955 | 7.217410935 | -1.473386261 | 0.173312442 | 0.173312442 | -4.70025847  |
| 1426832_at   | -0.088048273 | 9.630347868 | -1.473372054 | 0.173316189 | 0.173316189 | -4.700274454 |
| 1427880_at   | -0.107061565 | 4.389995443 | -1.473322582 | 0.173329237 | 0.173329237 | -4.700330117 |
| 1443446_at   | -0.11495127  | 3.178621933 | -1.473010938 | 0.173411455 | 0.173411455 | -4.700680735 |
| 1437084_at   | -0.106710812 | 4.292049561 | -1.472715999 | 0.173489296 | 0.173489296 | -4.70101252  |
| 1427278_at   | -0.168304041 | 7.549065609 | -1.472650742 | 0.173506523 | 0.173506523 | -4.701085925 |
| 1455840_at   | 0.195444349  | 7.556387219 | 1.472644357  | 0.173508209 | 0.173508209 | -4.701093107 |
| 1451978_at   | -0.166952242 | 10.14380255 | -1.472643619 | 0.173508404 | 0.173508404 | -4.701093937 |
| 1441283_at   | 0.154290478  | 5.690854983 | 1.472615133  | 0.173515924 | 0.173515924 | -4.701125979 |
| 1425741_at   | -0.145211604 | 3.824078554 | -1.472414802 | 0.173568821 | 0.173568821 | -4.701351307 |
| 1439693_a_at | -0.108008463 | 5.386487076 | -1.472397582 | 0.173573368 | 0.173573368 | -4.701370675 |
| 1421511_at   | -0.143216954 | 4.860297573 | -1.472364047 | 0.173582225 | 0.173582225 | -4.701408393 |

|              |              |             |              |             |             |              |
|--------------|--------------|-------------|--------------|-------------|-------------|--------------|
| 1455266_at   | 0.258508198  | 8.201452086 | 1.472323667  | 0.173592889 | 0.173592889 | -4.701453808 |
| 1440603_at   | -0.210600159 | 5.314598762 | -1.472264996 | 0.173608386 | 0.173608386 | -4.701519794 |
| 1440085_at   | -0.139112402 | 4.432040228 | -1.472002586 | 0.173677709 | 0.173677709 | -4.701814904 |
| 1433943_at   | 0.165471261  | 6.888469279 | 1.471946566  | 0.173692511 | 0.173692511 | -4.701877901 |
| 1459756_at   | 0.118559483  | 6.558027362 | 1.471917285  | 0.173700249 | 0.173700249 | -4.701910828 |
| 1434557_at   | -0.186329753 | 8.56162623  | -1.471875119 | 0.173711392 | 0.173711392 | -4.701958244 |
| 1426028_a_at | -0.169361053 | 6.466614917 | -1.471816305 | 0.173726935 | 0.173726935 | -4.702024379 |
| 1454203_at   | 0.104668213  | 3.879007006 | 1.471761481  | 0.173741425 | 0.173741425 | -4.702086026 |
| 1416965_at   | 0.199524946  | 5.652888684 | 1.471702926  | 0.173756902 | 0.173756902 | -4.702151868 |
| 1439686_at   | 0.284193146  | 5.659603541 | 1.471687333  | 0.173761024 | 0.173761024 | -4.702169401 |
| 1438789_s_at | 0.229690252  | 7.28501369  | 1.471582362  | 0.173788773 | 0.173788773 | -4.70228743  |
| 1426483_at   | 0.095213505  | 9.676722709 | 1.471535132  | 0.17380126  | 0.17380126  | -4.702340533 |
| 1432041_at   | -0.136762766 | 3.689222305 | -1.471525085 | 0.173803916 | 0.173803916 | -4.70235183  |
| 1453279_x_at | -0.124882942 | 4.577725237 | -1.471507005 | 0.173808697 | 0.173808697 | -4.702372158 |
| 1417693_a_at | 0.156063307  | 9.344703384 | 1.471489669  | 0.17381328  | 0.17381328  | -4.70239165  |
| 1456102_a_at | 0.273599623  | 6.771518611 | 1.471381882  | 0.173841782 | 0.173841782 | -4.702512836 |
| 1447376_at   | -0.107120506 | 6.084786145 | -1.471360576 | 0.173847416 | 0.173847416 | -4.70253679  |
| 1437566_at   | 0.099740761  | 7.756015042 | 1.471263239  | 0.173873158 | 0.173873158 | -4.70264622  |
| 1433075_at   | -0.133785997 | 4.344958315 | -1.471203221 | 0.173889033 | 0.173889033 | -4.702713694 |
| 1444519_at   | 0.208496297  | 5.488253008 | 1.471095057  | 0.173917645 | 0.173917645 | -4.702835291 |
| 1460305_at   | -0.134601308 | 5.187655223 | -1.47094619  | 0.17395703  | 0.17395703  | -4.703002636 |
| 1434447_at   | 0.137488478  | 7.83474299  | 1.470576876  | 0.174054773 | 0.174054773 | -4.703417751 |
| 1428143_a_at | -0.103501012 | 6.873260842 | -1.470534174 | 0.174066077 | 0.174066077 | -4.703465744 |
| 1443461_at   | 0.160498435  | 3.295235071 | 1.470508356  | 0.174072912 | 0.174072912 | -4.703494761 |
| 1450332_s_at | 0.098930008  | 4.203510471 | 1.470480853  | 0.174080194 | 0.174080194 | -4.703525672 |
| 1448280_at   | 0.176033882  | 5.149097695 | 1.470131857  | 0.174172614 | 0.174172614 | -4.703917879 |
| 1447638_at   | 0.106778113  | 3.280713064 | 1.470125663  | 0.174174255 | 0.174174255 | -4.70392484  |
| 1422752_at   | 0.112584329  | 9.018802653 | 1.469986036  | 0.174211243 | 0.174211243 | -4.70408174  |
| 1455527_at   | 0.116340371  | 5.678913949 | 1.469978657  | 0.174213198 | 0.174213198 | -4.704090031 |
| 1423853_at   | 0.135656131  | 4.037677319 | 1.469775915  | 0.174266918 | 0.174266918 | -4.704317838 |
| 1430321_at   | 0.109438705  | 3.417184635 | 1.469717377  | 0.174282432 | 0.174282432 | -4.704383609 |
| 1450552_at   | -0.137894832 | 3.760879148 | -1.469693761 | 0.174288691 | 0.174288691 | -4.704410144 |
| 1420858_at   | 0.154647335  | 6.946748085 | 1.469668944  | 0.174295268 | 0.174295268 | -4.704438027 |
| 1441057_at   | -0.140265888 | 5.078595314 | -1.469617746 | 0.174308838 | 0.174308838 | -4.704495549 |
| 1419792_at   | -0.1763245   | 3.268682415 | -1.469598132 | 0.174314037 | 0.174314037 | -4.704517585 |
| 1454171_x_at | -0.11934343  | 4.325758596 | -1.469531909 | 0.174331592 | 0.174331592 | -4.704591987 |
| 1447147_at   | 0.111167761  | 6.797773696 | 1.469462546  | 0.17434998  | 0.17434998  | -4.704669913 |
| 1449315_at   | 0.093447188  | 11.04480557 | 1.469419665  | 0.174361349 | 0.174361349 | -4.704718088 |
| 1442601_at   | 0.13554936   | 6.083040946 | 1.46917961   | 0.174425004 | 0.174425004 | -4.70498776  |
| 1431324_at   | -0.107478028 | 3.791868854 | -1.469146709 | 0.17443373  | 0.17443373  | -4.705024718 |
| 1416816_at   | -0.141024016 | 9.268769054 | -1.4689529   | 0.17448514  | 0.17448514  | -4.705242418 |
| 1431774_a_at | 0.13305445   | 4.991196184 | 1.468930783  | 0.174491007 | 0.174491007 | -4.70526726  |
| 1436275_at   | 0.110241343  | 5.498883937 | 1.468867926  | 0.174507684 | 0.174507684 | -4.705337861 |
| 1435358_at   | -0.115217964 | 7.38431617  | -1.468566716 | 0.174587618 | 0.174587618 | -4.705676158 |
| 1458936_at   | -0.097407589 | 4.465516668 | -1.468549131 | 0.174592285 | 0.174592285 | -4.705695906 |
| 1444989_at   | -0.134439528 | 4.434654428 | -1.468378231 | 0.174637653 | 0.174637653 | -4.705887829 |
| 1440256_at   | 0.114328517  | 4.881979626 | 1.468269756  | 0.174666455 | 0.174666455 | -4.706009641 |
| 1430431_at   | 0.200207456  | 4.790319237 | 1.468104945  | 0.174710222 | 0.174710222 | -4.706194707 |
| 1439519_at   | 0.109774138  | 3.946307465 | 1.468003985  | 0.174737038 | 0.174737038 | -4.706308067 |
| 1446652_at   | 0.104011448  | 4.148833892 | 1.468003155  | 0.174737259 | 0.174737259 | -4.706309    |
| 1448217_a_at | 0.125994293  | 11.57027131 | 1.467820273  | 0.174785843 | 0.174785843 | -4.706514334 |
| 1439591_at   | -0.132221992 | 5.027048747 | -1.467767844 | 0.174799773 | 0.174799773 | -4.706573197 |
| 1426596_a_at | -0.101003556 | 7.849326378 | -1.467457878 | 0.174882151 | 0.174882151 | -4.706921179 |

|              |              |             |              |             |             |              |
|--------------|--------------|-------------|--------------|-------------|-------------|--------------|
| 1439054_at   | -0.10402954  | 6.001939842 | -1.467441149 | 0.174886597 | 0.174886597 | -4.706939957 |
| 1430814_at   | -0.125993475 | 4.127403648 | -1.467196357 | 0.17495168  | 0.17495168  | -4.70721474  |
| 1418493_a_at | 0.178522184  | 8.041080427 | 1.467100649  | 0.174977131 | 0.174977131 | -4.707322166 |
| 1441521_at   | 0.131499321  | 4.672234958 | 1.467052086  | 0.174990046 | 0.174990046 | -4.707376674 |
| 1420527_s_at | -0.127858356 | 4.223358253 | -1.466991847 | 0.175006068 | 0.175006068 | -4.707444285 |
| 1449037_at   | -0.093916517 | 6.698339407 | -1.466778795 | 0.175062744 | 0.175062744 | -4.707683398 |
| 1425962_at   | 0.111006444  | 3.664584455 | 1.466727037  | 0.175076515 | 0.175076515 | -4.707741485 |
| 1416596_at   | -0.116841366 | 4.755145205 | -1.466648114 | 0.175097515 | 0.175097515 | -4.707830054 |
| 1445193_x_at | 0.135360422  | 4.008971605 | 1.466585067  | 0.175114293 | 0.175114293 | -4.707900806 |
| 1442096_at   | 0.126484722  | 3.728227688 | 1.466521942  | 0.175131093 | 0.175131093 | -4.707971643 |
| 1428904_at   | -0.108169429 | 7.887360673 | -1.466494656 | 0.175138355 | 0.175138355 | -4.708002262 |
| 1426123_a_at | -0.1210664   | 8.515742878 | -1.466493521 | 0.175138657 | 0.175138657 | -4.708003536 |
| 1441060_at   | -0.138343675 | 5.759723374 | -1.466491429 | 0.175139214 | 0.175139214 | -4.708005884 |
| 1456906_at   | 0.153019655  | 6.499698531 | 1.466431463  | 0.175155175 | 0.175155175 | -4.708073174 |
| 1460539_at   | -0.09439479  | 3.789374035 | -1.466271168 | 0.175197846 | 0.175197846 | -4.708253039 |
| 1424561_at   | -0.147803619 | 6.465777291 | -1.466238281 | 0.175206602 | 0.175206602 | -4.70828994  |
| 1452384_at   | -0.10590209  | 5.68100941  | -1.466233914 | 0.175207765 | 0.175207765 | -4.70829484  |
| 1453268_at   | -0.116331248 | 5.780431783 | -1.46623312  | 0.175207976 | 0.175207976 | -4.708295731 |
| 1443006_at   | 0.201450339  | 5.296545849 | 1.466224414  | 0.175210294 | 0.175210294 | -4.708305499 |
| 1427051_at   | -0.154841832 | 7.352918308 | -1.466161149 | 0.175227139 | 0.175227139 | -4.708376484 |
| 1448649_at   | 0.14654635   | 9.891758641 | 1.466146754  | 0.175230972 | 0.175230972 | -4.708392635 |
| 1432720_at   | -0.093444349 | 3.722727057 | -1.466094109 | 0.175244991 | 0.175244991 | -4.708451702 |
| 1440982_at   | 0.126432503  | 6.386774698 | 1.465975374  | 0.175276612 | 0.175276612 | -4.708584917 |
| 1446701_at   | 0.102447907  | 3.99975188  | 1.465957489  | 0.175281376 | 0.175281376 | -4.708604982 |
| 1441341_at   | 0.121844073  | 7.439725704 | 1.465871742  | 0.175304215 | 0.175304215 | -4.708701182 |
| 1421170_a_at | -0.131509805 | 5.704664425 | -1.465754338 | 0.175335491 | 0.175335491 | -4.708832893 |
| 1431924_at   | 0.123304759  | 3.938792505 | 1.465738578  | 0.17533969  | 0.17533969  | -4.708850572 |
| 1439753_x_at | 0.225210275  | 7.08941761  | 1.465715127  | 0.175345938 | 0.175345938 | -4.70887688  |
| 1421428_at   | 0.090139437  | 5.310157496 | 1.465713656  | 0.17534633  | 0.17534633  | -4.70887853  |
| 1457210_at   | 0.09715163   | 3.657223398 | 1.465691241  | 0.175352302 | 0.175352302 | -4.708903676 |
| 1443867_at   | 0.286852035  | 7.099414382 | 1.465665216  | 0.175359236 | 0.175359236 | -4.708932869 |
| 1460127_at   | 0.105999863  | 2.983334027 | 1.465629201  | 0.175368833 | 0.175368833 | -4.708973271 |
| 1422452_at   | -0.166598341 | 8.661555622 | -1.465572627 | 0.175383908 | 0.175383908 | -4.709036733 |
| 1438586_at   | 0.204202639  | 8.578230767 | 1.465323901  | 0.175450199 | 0.175450199 | -4.709315728 |
| 1457472_at   | 0.132641859  | 5.481340727 | 1.465249433  | 0.175470051 | 0.175470051 | -4.709399253 |
| 1420816_at   | 0.132905573  | 6.634282443 | 1.465184136  | 0.175487459 | 0.175487459 | -4.709472489 |
| 1416630_at   | 0.108698701  | 10.38121275 | 1.465156439  | 0.175494844 | 0.175494844 | -4.709503554 |
| 1443765_at   | -0.123490553 | 4.030320022 | -1.465086003 | 0.175513625 | 0.175513625 | -4.709582552 |
| 1456887_at   | -0.140157098 | 4.626618762 | -1.465033355 | 0.175527664 | 0.175527664 | -4.709641597 |
| 1419380_at   | -0.147202653 | 7.530951549 | -1.46486238  | 0.175573263 | 0.175573263 | -4.709833342 |
| 1455632_at   | -0.149618273 | 4.515555937 | -1.464745516 | 0.175604437 | 0.175604437 | -4.709964395 |
| 1450586_at   | 0.115459265  | 4.079058334 | 1.464676912  | 0.175622739 | 0.175622739 | -4.710041325 |
| 1449765_at   | -0.120986969 | 3.478982185 | -1.464580628 | 0.175648429 | 0.175648429 | -4.710149291 |
| 1460455_at   | 0.146607193  | 8.259459166 | 1.464565963  | 0.175652342 | 0.175652342 | -4.710165736 |
| 1429693_at   | -0.119020146 | 8.129440931 | -1.464533555 | 0.17566099  | 0.17566099  | -4.710202074 |
| 1437011_x_at | -0.166602869 | 4.571810542 | -1.464307849 | 0.175721228 | 0.175721228 | -4.710455146 |
| 1453007_at   | -0.106218956 | 7.898662632 | -1.464172883 | 0.175757256 | 0.175757256 | -4.710606465 |
| 1429155_at   | 0.10898161   | 8.854045836 | 1.464080247  | 0.175781989 | 0.175781989 | -4.71071032  |
| 1434598_at   | 0.088291751  | 10.38376008 | 1.463936864  | 0.175820277 | 0.175820277 | -4.710871062 |
| 1431275_at   | -0.114101384 | 4.442704089 | -1.463840111 | 0.175846117 | 0.175846117 | -4.710979523 |
| 1439273_at   | 0.103366273  | 7.421165438 | 1.463777196  | 0.175862922 | 0.175862922 | -4.711050049 |
| 1458918_at   | -0.197815929 | 4.132482543 | -1.463771593 | 0.175864418 | 0.175864418 | -4.711056329 |
| 1450254_at   | -0.186956891 | 5.40290098  | -1.463665343 | 0.175892801 | 0.175892801 | -4.71117543  |

|              |              |             |              |             |             |              |
|--------------|--------------|-------------|--------------|-------------|-------------|--------------|
| 1431813_at   | -0.106671036 | 4.642046965 | -1.463542405 | 0.175925647 | 0.175925647 | -4.711313229 |
| 1442277_at   | 0.221485118  | 7.313058232 | 1.463537735  | 0.175926895 | 0.175926895 | -4.711318463 |
| 1458412_at   | 0.131597115  | 4.724741433 | 1.463415518  | 0.175959553 | 0.175959553 | -4.711455447 |
| 1452966_at   | 0.140255399  | 8.627621525 | 1.463381422  | 0.175968665 | 0.175968665 | -4.711493662 |
| 1453641_at   | -0.151903824 | 4.696288904 | -1.463148098 | 0.176031031 | 0.176031031 | -4.711755156 |
| 1432811_at   | -0.099826572 | 4.499978307 | -1.463019338 | 0.176065456 | 0.176065456 | -4.711899453 |
| 1430638_at   | -0.125987754 | 5.09969105  | -1.46290214  | 0.176096795 | 0.176096795 | -4.712030785 |
| 1444392_at   | 0.093292027  | 6.755024132 | 1.462860056  | 0.176108049 | 0.176108049 | -4.712077943 |
| 1429323_at   | -0.268797717 | 3.725556228 | -1.46279769  | 0.176124729 | 0.176124729 | -4.712147827 |
| 1427220_a_at | -0.130835232 | 3.7582612   | -1.462767998 | 0.17613267  | 0.17613267  | -4.712181098 |
| 1456834_at   | -0.096692147 | 3.933433953 | -1.462734424 | 0.176141651 | 0.176141651 | -4.712218718 |
| 1443818_at   | -0.128876792 | 4.627456225 | -1.462690214 | 0.176153476 | 0.176153476 | -4.712268254 |
| 1460698_a_at | -0.118550986 | 8.467248891 | -1.462578128 | 0.176183461 | 0.176183461 | -4.712393842 |
| 1427392_at   | -0.121354893 | 4.330831995 | -1.462480602 | 0.176209554 | 0.176209554 | -4.712503112 |
| 1424388_at   | -0.107998896 | 8.091757708 | -1.462469786 | 0.176212448 | 0.176212448 | -4.71251523  |
| 1455995_at   | -0.170084616 | 3.596147955 | -1.462232254 | 0.176276015 | 0.176276015 | -4.712781345 |
| 1422492_at   | -0.103700559 | 6.426547668 | -1.462156685 | 0.176296243 | 0.176296243 | -4.712866002 |
| 1446022_at   | 0.095232324  | 7.346798679 | 1.462126127  | 0.176304423 | 0.176304423 | -4.712900235 |
| 1443084_at   | 0.130632284  | 4.454067985 | 1.462047151  | 0.176325565 | 0.176325565 | -4.712988705 |
| 1430364_at   | -0.129239575 | 3.651883102 | -1.461914871 | 0.176360983 | 0.176360983 | -4.713136882 |
| 1431401_at   | -0.141196085 | 3.704392498 | -1.461910252 | 0.176362219 | 0.176362219 | -4.713142055 |
| 1429675_at   | -0.126256208 | 3.340464351 | -1.461802684 | 0.176391025 | 0.176391025 | -4.713262544 |
| 1442470_at   | 0.164872823  | 5.507403916 | 1.461761913  | 0.176401944 | 0.176401944 | -4.713308211 |
| 1422079_at   | 0.115182146  | 6.990318694 | 1.461761616  | 0.176402024 | 0.176402024 | -4.713308544 |
| 1442599_at   | 0.163571599  | 4.695470903 | 1.461745731  | 0.176406278 | 0.176406278 | -4.713326337 |
| 1441704_at   | 0.130713758  | 6.786795696 | 1.461277757  | 0.176531653 | 0.176531653 | -4.713850451 |
| 1437865_at   | -0.112680217 | 7.1408953   | -1.461246267 | 0.176540093 | 0.176540093 | -4.713885716 |
| 1454249_at   | 0.106367937  | 3.768753502 | 1.461144249  | 0.176567436 | 0.176567436 | -4.713999957 |
| 1448979_at   | 0.120767387  | 8.193256608 | 1.461136318  | 0.176569562 | 0.176569562 | -4.714008838 |
| 1415969_s_at | -0.118146448 | 3.467119282 | -1.461053161 | 0.176591853 | 0.176591853 | -4.714101956 |
| 1453955_a_at | 0.127382217  | 3.678620791 | 1.461025944  | 0.176599149 | 0.176599149 | -4.714132433 |
| 1458054_at   | 0.228956943  | 7.025890079 | 1.460943572  | 0.176621233 | 0.176621233 | -4.714224668 |
| 1417599_at   | -0.159096754 | 8.936174001 | -1.460926047 | 0.176625931 | 0.176625931 | -4.71424429  |
| 1458007_at   | 0.306936028  | 7.26678485  | 1.46081461   | 0.176655812 | 0.176655812 | -4.714369064 |
| 1428531_at   | 0.113675273  | 9.921588304 | 1.460805583  | 0.176658233 | 0.176658233 | -4.714379172 |
| 1420288_at   | -0.125852481 | 3.447500026 | -1.460759702 | 0.176670537 | 0.176670537 | -4.714430543 |
| 1423528_at   | -0.115189742 | 5.324625866 | -1.460717315 | 0.176681904 | 0.176681904 | -4.714478    |
| 1416017_at   | -0.110916145 | 8.80498628  | -1.46070334  | 0.176685652 | 0.176685652 | -4.714493647 |
| 1443858_at   | 0.881221577  | 5.877566435 | 1.460696966  | 0.176687361 | 0.176687361 | -4.714500783 |
| 1435163_at   | 0.122545997  | 9.08724593  | 1.460694473  | 0.17668803  | 0.17668803  | -4.714503574 |
| 1433050_at   | 0.125882525  | 6.784451963 | 1.460623286  | 0.176707123 | 0.176707123 | -4.714583275 |
| 1460249_at   | 0.09053148   | 8.226284461 | 1.460491302  | 0.176742528 | 0.176742528 | -4.714731036 |
| 1459402_at   | -0.142652062 | 4.732321379 | -1.460486096 | 0.176743924 | 0.176743924 | -4.714736864 |
| 1438312_s_at | -0.138486631 | 10.35185528 | -1.460395166 | 0.17676832  | 0.17676832  | -4.71483866  |
| 1437383_at   | 0.134605922  | 3.226904434 | 1.460220392  | 0.176815218 | 0.176815218 | -4.715034308 |
| 1432276_at   | 0.105115643  | 3.844088293 | 1.460136469  | 0.176837742 | 0.176837742 | -4.71512825  |
| 1437200_at   | 0.269283647  | 9.404358035 | 1.460120753  | 0.17684196  | 0.17684196  | -4.715145842 |
| 1446854_at   | -0.123104545 | 3.934175361 | -1.459957605 | 0.176885754 | 0.176885754 | -4.715328456 |
| 1443431_at   | 0.112598708  | 3.549650133 | 1.459848987  | 0.176914916 | 0.176914916 | -4.715450028 |
| 1458789_at   | 0.129644812  | 3.623950889 | 1.459826732  | 0.176920891 | 0.176920891 | -4.715474936 |
| 1430225_at   | 0.100680153  | 3.613870477 | 1.459752756  | 0.176940755 | 0.176940755 | -4.715557731 |
| 1458990_at   | -0.108703246 | 3.322637074 | -1.459702518 | 0.176954246 | 0.176954246 | -4.715613955 |
| 1440541_at   | 0.112114559  | 5.467258416 | 1.45967034   | 0.176962888 | 0.176962888 | -4.715649968 |

|              |              |             |              |             |             |              |
|--------------|--------------|-------------|--------------|-------------|-------------|--------------|
| 1434683_at   | 0.139497415  | 7.431746931 | 1.459511877  | 0.177005449 | 0.177005449 | -4.715827307 |
| 1446795_at   | -0.130449026 | 3.372594359 | -1.459417949 | 0.177030681 | 0.177030681 | -4.715932418 |
| 1442327_at   | -0.109388709 | 3.446057632 | -1.459417813 | 0.177030718 | 0.177030718 | -4.71593257  |
| 1418163_at   | -0.167397012 | 5.455419173 | -1.459416197 | 0.177031152 | 0.177031152 | -4.715934379 |
| 1421078_at   | -0.114175361 | 4.153612189 | -1.459221764 | 0.177083393 | 0.177083393 | -4.716151949 |
| 1439076_at   | 0.139105983  | 6.031241161 | 1.4591723    | 0.177096686 | 0.177096686 | -4.716207297 |
| 1436406_at   | 0.157799973  | 4.741901382 | 1.459121048  | 0.17711046  | 0.17711046  | -4.716264644 |
| 1442328_at   | -0.147471065 | 5.827789054 | -1.459096834 | 0.177116967 | 0.177116967 | -4.716291737 |
| 1452059_at   | -0.09508338  | 9.269106223 | -1.458954575 | 0.177155205 | 0.177155205 | -4.716450907 |
| 1450245_at   | -0.120647582 | 3.222873023 | -1.458752191 | 0.177209616 | 0.177209616 | -4.716677333 |
| 1435819_at   | -0.112081312 | 4.13491529  | -1.458656331 | 0.177235393 | 0.177235393 | -4.716784573 |
| 1440734_at   | 0.116161236  | 5.294887827 | 1.45856805   | 0.177259135 | 0.177259135 | -4.716883333 |
| 1439208_at   | 0.122636679  | 6.662049868 | 1.458540287  | 0.177266602 | 0.177266602 | -4.71691439  |
| 1432620_at   | -0.111928687 | 4.931906777 | -1.458479799 | 0.177282872 | 0.177282872 | -4.716982054 |
| 1442870_at   | -0.125469648 | 5.592243645 | -1.458416605 | 0.177299871 | 0.177299871 | -4.717052745 |
| 1436018_at   | 0.113404322  | 7.945595389 | 1.458308472  | 0.177328961 | 0.177328961 | -4.7171737   |
| 1422986_at   | 0.101653655  | 4.540708892 | 1.457939981  | 0.177428125 | 0.177428125 | -4.717585847 |
| 1459910_at   | 0.194027244  | 6.207736325 | 1.45791353   | 0.177435245 | 0.177435245 | -4.717615429 |
| 1442808_at   | -0.108245327 | 4.629483827 | -1.457844404 | 0.177453854 | 0.177453854 | -4.717692736 |
| 1458823_at   | 0.150808044  | 5.67581705  | 1.457794705  | 0.177467233 | 0.177467233 | -4.717748316 |
| 1416319_at   | -0.142370065 | 9.651192002 | -1.457762095 | 0.177476013 | 0.177476013 | -4.717784785 |
| 1442020_at   | -0.166659835 | 3.994946654 | -1.457710829 | 0.177489816 | 0.177489816 | -4.717842116 |
| 1456640_at   | 0.166427206  | 6.721676692 | 1.45755693   | 0.177531259 | 0.177531259 | -4.718014215 |
| 1417471_s_at | 0.142038234  | 6.858730174 | 1.457444338  | 0.177561583 | 0.177561583 | -4.718140114 |
| 1434190_at   | 0.093539642  | 8.013950473 | 1.457440512  | 0.177562613 | 0.177562613 | -4.718144393 |
| 1422715_s_at | 0.119268321  | 10.37666897 | 1.457387329  | 0.177576939 | 0.177576939 | -4.71820386  |
| 1427785_x_at | 0.112572779  | 9.092798156 | 1.457274927  | 0.177607219 | 0.177607219 | -4.718329538 |
| 1430206_at   | -0.089733677 | 4.009839639 | -1.45709638  | 0.177655327 | 0.177655327 | -4.718529164 |
| 1438534_x_at | -0.095659368 | 5.914412986 | -1.45706827  | 0.177662902 | 0.177662902 | -4.718560592 |
| 1456799_at   | 0.132500094  | 4.39214021  | 1.457011727  | 0.17767814  | 0.17767814  | -4.718623807 |
| 1435559_at   | -0.242368356 | 7.318899507 | -1.456895407 | 0.177709491 | 0.177709491 | -4.718753847 |
| 1423183_at   | -0.201020073 | 4.327750369 | -1.456812959 | 0.177731715 | 0.177731715 | -4.718846016 |
| 1418782_at   | -0.18163876  | 5.834867169 | -1.456634513 | 0.177779825 | 0.177779825 | -4.719045493 |
| 1436182_at   | 0.099188343  | 6.645187397 | 1.456614211  | 0.177785299 | 0.177785299 | -4.719068186 |
| 1447192_at   | -0.136300016 | 3.845411664 | -1.456520041 | 0.177810693 | 0.177810693 | -4.719173448 |
| 1417539_at   | -0.110498793 | 8.185631244 | -1.456483375 | 0.177820581 | 0.177820581 | -4.719214431 |
| 1426515_a_at | 0.126063671  | 7.998914128 | 1.456438965  | 0.177832559 | 0.177832559 | -4.71926407  |
| 1431920_a_at | -0.138341337 | 4.822917138 | -1.456350881 | 0.177856317 | 0.177856317 | -4.719362523 |
| 1442661_at   | 0.099179413  | 4.487293567 | 1.456274922  | 0.177876807 | 0.177876807 | -4.71944742  |
| 1421149_a_at | -0.271697835 | 6.935037496 | -1.456096591 | 0.17792492  | 0.17792492  | -4.719646725 |
| 1438500_at   | -0.150140747 | 4.314630329 | -1.456070793 | 0.177931881 | 0.177931881 | -4.719675556 |
| 1445269_at   | -0.111441411 | 6.028103108 | -1.455921271 | 0.177972231 | 0.177972231 | -4.719842651 |
| 1459738_x_at | 0.131816386  | 3.370671348 | 1.455841542  | 0.177993751 | 0.177993751 | -4.719931747 |
| 1452399_at   | -0.176001903 | 4.336132986 | -1.455775356 | 0.178011616 | 0.178011616 | -4.720005706 |
| 1430429_at   | -0.131852901 | 6.300185561 | -1.455662919 | 0.17804197  | 0.17804197  | -4.720131344 |
| 1416534_at   | 0.098568251  | 9.922274447 | 1.455658051  | 0.178043284 | 0.178043284 | -4.720136784 |
| 1457325_at   | 0.108575252  | 4.723787146 | 1.455617529  | 0.178054225 | 0.178054225 | -4.720182062 |
| 1442524_at   | -0.113053365 | 5.374513642 | -1.455560951 | 0.178069501 | 0.178069501 | -4.720245279 |
| 1427622_at   | 0.135844771  | 4.629649886 | 1.455539435  | 0.178075311 | 0.178075311 | -4.72026932  |
| 1423619_at   | -0.113512057 | 5.581195952 | -1.45549383  | 0.178087626 | 0.178087626 | -4.720320276 |
| 1449305_at   | 0.190509029  | 4.368645562 | 1.45536008   | 0.178123747 | 0.178123747 | -4.720469711 |
| 1426850_a_at | -0.120629001 | 7.616379942 | -1.455323879 | 0.178133524 | 0.178133524 | -4.720510156 |
| 1437107_at   | 0.122708515  | 4.560338221 | 1.455231464  | 0.178158487 | 0.178158487 | -4.720613404 |

|              |              |             |              |             |             |              |
|--------------|--------------|-------------|--------------|-------------|-------------|--------------|
| 1459590_at   | 0.105265416  | 7.630625352 | 1.455206145  | 0.178165327 | 0.178165327 | -4.720641689 |
| 1429555_at   | -0.157710018 | 8.179421942 | -1.455076187 | 0.178200437 | 0.178200437 | -4.720786872 |
| 1457573_at   | 0.18323901   | 5.511075227 | 1.454935181  | 0.178238539 | 0.178238539 | -4.720944389 |
| 1439347_at   | -0.100994208 | 5.614600029 | -1.454726316 | 0.17829499  | 0.17829499  | -4.721177694 |
| 1458499_at   | 0.127318722  | 5.397063158 | 1.454687738  | 0.178305419 | 0.178305419 | -4.721220785 |
| 1423173_at   | 0.107329341  | 6.130590626 | 1.45468428   | 0.178306354 | 0.178306354 | -4.721224647 |
| 1447474_at   | -0.151456217 | 4.749391157 | -1.454670605 | 0.178310051 | 0.178310051 | -4.721239921 |
| 1432599_at   | -0.131890777 | 4.122013302 | -1.454638657 | 0.178318687 | 0.178318687 | -4.721275605 |
| 1425453_x_at | -0.10097228  | 3.146402172 | -1.45459592  | 0.178330241 | 0.178330241 | -4.721323339 |
| 1437876_at   | -0.146979631 | 4.467306913 | -1.454572225 | 0.178336648 | 0.178336648 | -4.721349804 |
| 1439021_at   | -0.113974526 | 7.370727541 | -1.454424025 | 0.17837672  | 0.17837672  | -4.721515324 |
| 1452841_at   | 0.191771539  | 7.199630191 | 1.454354888  | 0.178395417 | 0.178395417 | -4.721592537 |
| 1424450_at   | -0.128821834 | 7.024590947 | -1.454292109 | 0.178412396 | 0.178412396 | -4.721662648 |
| 1434750_at   | 0.096106261  | 9.07206511  | 1.454254866  | 0.178422469 | 0.178422469 | -4.72170424  |
| 1447204_at   | -0.128532158 | 8.826297451 | -1.454136077 | 0.178454602 | 0.178454602 | -4.721836895 |
| 1457017_at   | 0.158973147  | 4.340169654 | 1.454059641  | 0.178475281 | 0.178475281 | -4.721922251 |
| 1431448_at   | -0.175723835 | 3.463654898 | -1.454043341 | 0.178479691 | 0.178479691 | -4.721940452 |
| 1432166_at   | -0.149183565 | 5.280129063 | -1.453984163 | 0.178495702 | 0.178495702 | -4.722006533 |
| 1418330_at   | 0.104827843  | 8.913839676 | 1.453955631  | 0.178503423 | 0.178503423 | -4.722038393 |
| 1419937_at   | -0.150741184 | 4.460598587 | -1.453945451 | 0.178506177 | 0.178506177 | -4.722049761 |
| 1456427_at   | -0.124879837 | 5.145352713 | -1.453876153 | 0.17852493  | 0.17852493  | -4.722127139 |
| 1418634_at   | 0.145974937  | 9.177654774 | 1.453733757  | 0.178563468 | 0.178563468 | -4.722286132 |
| 1424315_at   | -0.25426496  | 7.768995217 | -1.453725505 | 0.178565701 | 0.178565701 | -4.722295346 |
| 1420374_at   | 0.136120209  | 8.628327389 | 1.453671075  | 0.178580434 | 0.178580434 | -4.722356117 |
| 1457857_at   | -0.120521051 | 3.44848456  | -1.45363071  | 0.178591361 | 0.178591361 | -4.722401184 |
| 1430125_s_at | 0.108305068  | 8.130573285 | 1.453455467  | 0.178638805 | 0.178638805 | -4.722596834 |
| 1437592_x_at | 0.106492553  | 7.451144604 | 1.453431578  | 0.178645274 | 0.178645274 | -4.722623503 |
| 1427266_at   | 0.109500115  | 10.30265829 | 1.453300075  | 0.178680884 | 0.178680884 | -4.722770309 |
| 1455740_at   | 0.309027761  | 7.627048167 | 1.453243541  | 0.178696195 | 0.178696195 | -4.722833419 |
| 1431788_at   | -0.115470065 | 4.061489911 | -1.453131009 | 0.178726676 | 0.178726676 | -4.722959036 |
| 1439639_at   | -0.139233016 | 6.335986381 | -1.453052516 | 0.178747939 | 0.178747939 | -4.723046653 |
| 1421370_a_at | -0.130235034 | 5.41153679  | -1.452999624 | 0.178762269 | 0.178762269 | -4.723105692 |
| 1421712_at   | 0.129330171  | 3.65516226  | 1.452974397  | 0.178769103 | 0.178769103 | -4.72313385  |
| 1422035_at   | -0.143815375 | 3.706734053 | -1.45296065  | 0.178772828 | 0.178772828 | -4.723149195 |
| 1426910_at   | -0.115834754 | 8.607180857 | -1.452914431 | 0.178785351 | 0.178785351 | -4.723200783 |
| 1443998_at   | -0.140184943 | 3.563098368 | -1.452895499 | 0.178790481 | 0.178790481 | -4.723221914 |
| 1415812_at   | -0.15639761  | 11.22955147 | -1.45277246  | 0.178823823 | 0.178823823 | -4.723359242 |
| 1446232_at   | -0.114380661 | 4.22737115  | -1.452758627 | 0.178827572 | 0.178827572 | -4.723374681 |
| 1430200_at   | -0.105222063 | 4.690987727 | -1.452730991 | 0.178835061 | 0.178835061 | -4.723405525 |
| 1454442_at   | 0.09438985   | 3.385469252 | 1.452665234  | 0.178852884 | 0.178852884 | -4.723478915 |
| 1445410_at   | 0.144933242  | 5.488885356 | 1.452615005  | 0.178866499 | 0.178866499 | -4.723534971 |
| 1435720_at   | 0.144491963  | 6.415888083 | 1.452359492  | 0.178935771 | 0.178935771 | -4.723820118 |
| 1447575_at   | -0.176178476 | 4.05377083  | -1.452248767 | 0.178965797 | 0.178965797 | -4.723943675 |
| 1455374_at   | 0.180123273  | 3.403844185 | 1.452087239  | 0.179009607 | 0.179009607 | -4.724123913 |
| 1422826_at   | -0.119116893 | 5.300776826 | -1.451921188 | 0.179054653 | 0.179054653 | -4.724309186 |
| 1421056_at   | 0.127493082  | 3.590196466 | 1.451897654  | 0.179061038 | 0.179061038 | -4.724335443 |
| 1435219_x_at | 0.108650033  | 4.342105762 | 1.45188072   | 0.179065633 | 0.179065633 | -4.724354336 |
| 1451545_at   | 0.136601594  | 9.320318873 | 1.451710612  | 0.179111793 | 0.179111793 | -4.72454412  |
| 1450781_at   | 0.390522933  | 9.536334239 | 1.45163166   | 0.17913322  | 0.17913322  | -4.7246322   |
| 1455462_at   | -0.112071858 | 8.768942676 | -1.451532577 | 0.179160115 | 0.179160115 | -4.724742734 |
| 1423672_at   | -0.164336303 | 7.957663447 | -1.451506247 | 0.179167262 | 0.179167262 | -4.724772106 |
| 1434980_at   | 0.153916115  | 4.81205969  | 1.451215695  | 0.17924615  | 0.17924615  | -4.72509621  |
| 1443031_at   | 0.108644037  | 4.7179199   | 1.451168377  | 0.179259    | 0.179259    | -4.725148988 |



|              |              |             |              |             |             |              |
|--------------|--------------|-------------|--------------|-------------|-------------|--------------|
| 1457753_at   | -0.148971689 | 5.186052207 | -1.451165005 | 0.179259916 | 0.179259916 | -4.725152748 |
| 1449330_at   | -0.16814208  | 4.473692148 | -1.451140294 | 0.179266627 | 0.179266627 | -4.725180311 |
| 1436873_at   | -0.120824431 | 3.785597165 | -1.451107111 | 0.179275639 | 0.179275639 | -4.725217322 |
| 1448524_s_at | -0.124781684 | 10.67325981 | -1.451074083 | 0.17928461  | 0.17928461  | -4.72525416  |
| 1457896_at   | -0.132733165 | 4.40516777  | -1.451039383 | 0.179294035 | 0.179294035 | -4.725292862 |
| 1453036_at   | 0.125518083  | 6.673630919 | 1.450984677  | 0.179308895 | 0.179308895 | -4.725353877 |
| 1428656_at   | -0.109659184 | 8.563254614 | -1.450934395 | 0.179322554 | 0.179322554 | -4.725409956 |
| 1430031_at   | -0.13052884  | 3.994840663 | -1.450930007 | 0.179323746 | 0.179323746 | -4.72541485  |
| 1417301_at   | 0.165763189  | 8.818243191 | 1.450926544  | 0.179324687 | 0.179324687 | -4.725418712 |
| 1453303_at   | -0.182129905 | 4.922254209 | -1.450764319 | 0.179368763 | 0.179368763 | -4.725599632 |
| 1440680_at   | -0.110416522 | 5.73030694  | -1.45073596  | 0.179376469 | 0.179376469 | -4.725631258 |
| 1457582_at   | 0.845241011  | 3.912806752 | 1.450513886  | 0.179436822 | 0.179436822 | -4.725878902 |
| 1435392_at   | 0.202941136  | 4.027590724 | 1.450506248  | 0.179438898 | 0.179438898 | -4.725887419 |
| 1455836_at   | 0.143279865  | 9.106403782 | 1.450474398  | 0.179447556 | 0.179447556 | -4.725922935 |
| 1424533_a_at | 0.093748669  | 8.218821578 | 1.450440911  | 0.179456659 | 0.179456659 | -4.725960275 |
| 1440723_at   | 0.101745759  | 4.379308983 | 1.450406751  | 0.179465945 | 0.179465945 | -4.725998366 |
| 1418287_a_at | -0.158545628 | 3.424566856 | -1.450378964 | 0.179473499 | 0.179473499 | -4.726029349 |
| 1456012_x_at | -0.154044808 | 10.24737744 | -1.45029927  | 0.179495166 | 0.179495166 | -4.72611821  |
| 1459431_at   | -0.23383512  | 4.566517994 | -1.450276889 | 0.179501251 | 0.179501251 | -4.726143165 |
| 1441730_at   | 0.106567082  | 3.517242761 | 1.450166231  | 0.179531341 | 0.179531341 | -4.726266544 |
| 1444896_at   | -0.100585914 | 3.434036318 | -1.450087242 | 0.179552822 | 0.179552822 | -4.726354611 |
| 1458351_s_at | 0.205114098  | 5.199752492 | 1.449960444  | 0.179587309 | 0.179587309 | -4.726495975 |
| 1435115_at   | -0.251746716 | 6.016782806 | -1.449904319 | 0.179602577 | 0.179602577 | -4.726558546 |
| 1439645_at   | -0.110547995 | 3.975672261 | -1.449847491 | 0.179618036 | 0.179618036 | -4.726621898 |
| 1420712_a_at | 0.116339342  | 5.309610349 | 1.449829622  | 0.179622897 | 0.179622897 | -4.726641819 |
| 1417276_at   | -0.112273862 | 3.644366501 | -1.449776642 | 0.179637311 | 0.179637311 | -4.726700879 |
| 1448557_at   | 0.134978172  | 7.803373687 | 1.449130473  | 0.179813192 | 0.179813192 | -4.727421114 |
| 1440787_s_at | 0.139857102  | 5.465995429 | 1.449121054  | 0.179815757 | 0.179815757 | -4.727431611 |
| 1439836_at   | 0.128464782  | 3.445223874 | 1.449024717  | 0.179841992 | 0.179841992 | -4.727538974 |
| 1433553_at   | 0.142707039  | 6.096956194 | 1.448997621  | 0.179849372 | 0.179849372 | -4.72756917  |
| 1451040_at   | 0.117817036  | 8.635007252 | 1.448994461  | 0.179850232 | 0.179850232 | -4.727572692 |
| 1431731_at   | 0.179200907  | 4.194212654 | 1.448861978  | 0.179886318 | 0.179886318 | -4.727720329 |
| 1429230_at   | -0.109022248 | 3.765890493 | -1.448707449 | 0.179928416 | 0.179928416 | -4.727892525 |
| 1443135_at   | -0.13573157  | 3.690549649 | -1.448702422 | 0.179929786 | 0.179929786 | -4.727898126 |
| 1446651_at   | -0.138228917 | 4.519368354 | -1.448573757 | 0.179964845 | 0.179964845 | -4.728041493 |
| 1427404_x_at | -0.11418925  | 12.18824826 | -1.448518657 | 0.17997986  | 0.17997986  | -4.728102886 |
| 1418982_at   | -0.111483009 | 7.430338713 | -1.448435975 | 0.180002394 | 0.180002394 | -4.728195009 |
| 1439799_at   | 0.116640959  | 8.022586468 | 1.44809552   | 0.180095207 | 0.180095207 | -4.728574307 |
| 1439699_at   | -0.133508077 | 3.279304056 | -1.447857083 | 0.180160233 | 0.180160233 | -4.728839917 |
| 1430401_at   | 0.113336663  | 4.701603753 | 1.447769214  | 0.180184202 | 0.180184202 | -4.728937794 |
| 1445172_at   | 0.100696677  | 4.036922102 | 1.447746903  | 0.180190288 | 0.180190288 | -4.728962646 |
| 1423774_a_at | -0.111304884 | 8.834846629 | -1.447468993 | 0.180266116 | 0.180266116 | -4.729272181 |
| 1423842_a_at | 0.118944889  | 7.358278872 | 1.447321495  | 0.180306372 | 0.180306372 | -4.72943645  |
| 1441257_x_at | 0.119636765  | 3.79888502  | 1.447247706  | 0.180326514 | 0.180326514 | -4.729518626 |
| 1432607_at   | -0.107278943 | 4.330919891 | -1.447245838 | 0.180327023 | 0.180327023 | -4.729520706 |
| 1440612_at   | 0.097385457  | 4.309567685 | 1.447235652  | 0.180329804 | 0.180329804 | -4.729532049 |
| 1453137_at   | 0.09718602   | 8.325551189 | 1.447179264  | 0.180345198 | 0.180345198 | -4.729594844 |
| 1445420_at   | -0.202844925 | 6.779158603 | -1.447119344 | 0.180361556 | 0.180361556 | -4.72966157  |
| 1437779_at   | 0.094663874  | 3.519989107 | 1.447063249  | 0.180376872 | 0.180376872 | -4.729724036 |
| 1422534_at   | 0.144214085  | 5.204728169 | 1.446990006  | 0.180396872 | 0.180396872 | -4.729805595 |
| 1435966_x_at | 0.134857559  | 6.665138328 | 1.446728735  | 0.180468229 | 0.180468229 | -4.73009651  |
| 1450357_a_at | -0.157756964 | 5.198629842 | -1.446669018 | 0.180484542 | 0.180484542 | -4.730162998 |
| 1445480_at   | 0.095487391  | 4.737318661 | 1.446543244  | 0.180518905 | 0.180518905 | -4.73030303  |

|              |              |             |              |             |             |              |
|--------------|--------------|-------------|--------------|-------------|-------------|--------------|
| 1447871_at   | 0.109646082  | 3.228987014 | 1.446513566  | 0.180527014 | 0.180527014 | -4.730336071 |
| 1439331_at   | -0.119776705 | 4.424442528 | -1.446314824 | 0.180581326 | 0.180581326 | -4.730557323 |
| 1457527_at   | 0.105825299  | 3.598334767 | 1.446308333  | 0.1805831   | 0.1805831   | -4.730564549 |
| 1451388_a_at | -0.093528593 | 9.112885053 | -1.446235667 | 0.180602961 | 0.180602961 | -4.730645441 |
| 1443887_at   | 0.129937344  | 4.46613389  | 1.446230611  | 0.180604343 | 0.180604343 | -4.730651069 |
| 1453300_at   | 0.174401501  | 4.697534714 | 1.446051167  | 0.180653398 | 0.180653398 | -4.730850815 |
| 1442769_at   | -0.314353629 | 5.547374214 | -1.445975385 | 0.180674119 | 0.180674119 | -4.730935167 |
| 1436401_at   | 0.152743934  | 6.421744038 | 1.445923292  | 0.180688363 | 0.180688363 | -4.730993149 |
| 1416763_at   | 0.10282588   | 10.68534887 | 1.445882984  | 0.180699386 | 0.180699386 | -4.731038014 |
| 1425990_a_at | -0.118078458 | 4.144483339 | -1.445664671 | 0.180759096 | 0.180759096 | -4.731280992 |
| 1417261_at   | 0.152231308  | 9.289553623 | 1.445406963  | 0.180829602 | 0.180829602 | -4.731567787 |
| 1432148_at   | 0.087328772  | 3.631200708 | 1.445324742  | 0.180852102 | 0.180852102 | -4.731659283 |
| 1447517_at   | 0.898164523  | 5.793651413 | 1.445319933  | 0.180853418 | 0.180853418 | -4.731664634 |
| 1426383_at   | -0.119446051 | 7.440009801 | -1.44505826  | 0.180925042 | 0.180925042 | -4.731955802 |
| 1443266_at   | -0.093700944 | 5.05814712  | -1.444864902 | 0.180977983 | 0.180977983 | -4.732170935 |
| 1426432_a_at | -0.125971922 | 5.323146023 | -1.444852639 | 0.180981341 | 0.180981341 | -4.732184578 |
| 1460282_at   | 0.145133984  | 4.144090045 | 1.444842132  | 0.180984218 | 0.180984218 | -4.732196267 |
| 1429273_at   | 0.295061163  | 8.024251924 | 1.444841812  | 0.180984305 | 0.180984305 | -4.732196623 |
| 1418302_at   | -0.112316392 | 8.863444378 | -1.444707864 | 0.181020989 | 0.181020989 | -4.732345645 |
| 1443689_at   | 0.090680523  | 6.001752159 | 1.44470493   | 0.181021792 | 0.181021792 | -4.732348908 |
| 1432554_at   | -0.140388519 | 4.495342043 | -1.444688407 | 0.181026318 | 0.181026318 | -4.73236729  |
| 1425382_a_at | -0.396449707 | 5.739125046 | -1.444627066 | 0.18104312  | 0.18104312  | -4.732435531 |
| 1453469_at   | -0.118105758 | 5.108198705 | -1.444454473 | 0.181090401 | 0.181090401 | -4.732627527 |
| 1441271_at   | 0.107223111  | 4.260697405 | 1.444393607  | 0.181107077 | 0.181107077 | -4.732695233 |
| 1430663_at   | -0.159207532 | 6.39708334  | -1.444392422 | 0.181107402 | 0.181107402 | -4.732696551 |
| 1444118_at   | -0.100321223 | 3.903697473 | -1.444287003 | 0.181136289 | 0.181136289 | -4.732813812 |
| 1445791_at   | 0.106362655  | 3.332851912 | 1.444284995  | 0.181136839 | 0.181136839 | -4.732816046 |
| 1458385_at   | -0.303162805 | 6.076141645 | -1.444280964 | 0.181137944 | 0.181137944 | -4.73282053  |
| 1448805_at   | -0.091781892 | 7.294988836 | -1.443977267 | 0.181221186 | 0.181221186 | -4.733158313 |
| 1426947_x_at | -0.177395605 | 10.83403206 | -1.443970454 | 0.181223054 | 0.181223054 | -4.733165891 |
| 1439734_at   | 0.167334524  | 6.329175258 | 1.443929404  | 0.181234308 | 0.181234308 | -4.733211545 |
| 1420296_at   | -0.099542448 | 5.440206706 | -1.443893011 | 0.181244286 | 0.181244286 | -4.733252019 |
| 1433395_at   | 0.113523309  | 4.942207039 | 1.44374532   | 0.181284783 | 0.181284783 | -4.733416266 |
| 1442822_at   | 0.108772923  | 3.182544891 | 1.443732729  | 0.181288236 | 0.181288236 | -4.733430268 |
| 1439072_at   | -0.279603798 | 7.359020624 | -1.443700795 | 0.181296994 | 0.181296994 | -4.733465781 |
| 1428581_at   | -0.227363058 | 4.440765534 | -1.443376079 | 0.181386066 | 0.181386066 | -4.733826857 |
| 1449992_at   | -0.125071226 | 6.049028456 | -1.443310092 | 0.181404171 | 0.181404171 | -4.733900227 |
| 1437270_a_at | 0.160437938  | 6.730353223 | 1.443256963  | 0.181418749 | 0.181418749 | -4.733959299 |
| 1450597_at   | -0.134520762 | 4.085120818 | -1.443235939 | 0.181424519 | 0.181424519 | -4.733982675 |
| 1455103_at   | 0.091378892  | 9.041468835 | 1.44322401   | 0.181427792 | 0.181427792 | -4.733995938 |
| 1449752_at   | 0.108535549  | 4.147761535 | 1.443118688  | 0.181456696 | 0.181456696 | -4.734113036 |
| 1458271_at   | 0.126675347  | 4.001289566 | 1.443105895  | 0.181460208 | 0.181460208 | -4.734127259 |
| 1444669_at   | -0.104319602 | 6.440951364 | -1.443082181 | 0.181466716 | 0.181466716 | -4.734153623 |
| 1443412_s_at | 0.157190448  | 6.000027103 | 1.44285519   | 0.181529028 | 0.181529028 | -4.734405973 |
| 1437396_at   | -0.109758495 | 7.45611198  | -1.442790679 | 0.18154674  | 0.18154674  | -4.734477687 |
| 1455279_at   | -0.326016571 | 6.309241815 | -1.442331014 | 0.18167299  | 0.18167299  | -4.734988621 |
| 1457346_at   | -0.103440794 | 4.574676662 | -1.442200988 | 0.181708716 | 0.181708716 | -4.735133133 |
| 1441712_at   | 0.235999822  | 4.406299548 | 1.442133095  | 0.181727373 | 0.181727373 | -4.735208586 |
| 1427163_at   | 0.15334071   | 6.359145293 | 1.442067396  | 0.181745429 | 0.181745429 | -4.735281599 |
| 1450327_at   | -0.097565278 | 5.562101165 | -1.442047592 | 0.181750872 | 0.181750872 | -4.735303608 |
| 1444098_at   | -0.149928732 | 4.351819506 | -1.441938753 | 0.181780787 | 0.181780787 | -4.735424559 |
| 1423652_at   | 0.119411659  | 8.974069088 | 1.441932287  | 0.181782565 | 0.181782565 | -4.735431744 |
| 1434406_at   | -0.101601725 | 8.37769049  | -1.441878034 | 0.181797479 | 0.181797479 | -4.735492032 |

|              |              |             |              |             |             |              |
|--------------|--------------|-------------|--------------|-------------|-------------|--------------|
| 1452664_a_at | -0.157383159 | 9.254579945 | -1.44180849  | 0.181816597 | 0.181816597 | -4.73556931  |
| 1421800_at   | -0.174827013 | 5.596352994 | -1.441689115 | 0.181849419 | 0.181849419 | -4.735701956 |
| 1446735_at   | -0.145330712 | 6.74312354  | -1.44156917  | 0.181882403 | 0.181882403 | -4.735835229 |
| 1430852_at   | -0.212646647 | 5.518022859 | -1.441261948 | 0.18196691  | 0.18196691  | -4.736176559 |
| 1419443_at   | 0.101626174  | 9.101511754 | 1.441163172  | 0.181994087 | 0.181994087 | -4.736286292 |
| 1435676_at   | -0.218493556 | 6.988237702 | -1.44107379  | 0.182018683 | 0.182018683 | -4.736385585 |
| 1417419_at   | 0.168205542  | 8.972480351 | 1.441006724  | 0.18203714  | 0.18203714  | -4.736460086 |
| 1429451_at   | 0.15518122   | 8.838711517 | 1.440980582  | 0.182044335 | 0.182044335 | -4.736489126 |
| 1446572_at   | -0.098164267 | 3.485153561 | -1.440892129 | 0.182068681 | 0.182068681 | -4.736587379 |
| 1437871_at   | -0.218677246 | 9.933197472 | -1.440685406 | 0.18212559  | 0.18212559  | -4.736816994 |
| 1440691_at   | 0.119085911  | 4.945912345 | 1.440631664  | 0.182140387 | 0.182140387 | -4.736876684 |
| 1431281_at   | -0.131801995 | 4.084161432 | -1.440550306 | 0.18216279  | 0.18216279  | -4.736967045 |
| 1418771_a_at | -0.120927491 | 3.278855672 | -1.440447792 | 0.182191023 | 0.182191023 | -4.737080898 |
| 1447409_at   | -0.114717047 | 6.081858862 | -1.440412449 | 0.182200757 | 0.182200757 | -4.737120149 |
| 1453577_at   | -0.121456411 | 6.172980856 | -1.440379958 | 0.182209706 | 0.182209706 | -4.737156231 |
| 1441180_at   | -0.132955711 | 3.994655151 | -1.440323052 | 0.182225381 | 0.182225381 | -4.737219428 |
| 1443335_at   | -0.173134234 | 7.717965278 | -1.440292478 | 0.182233803 | 0.182233803 | -4.737253381 |
| 1424071_s_at | 0.116668092  | 9.129806605 | 1.440131469  | 0.182278161 | 0.182278161 | -4.737432178 |
| 1433028_at   | -0.101963277 | 4.478690632 | -1.440056708 | 0.182298761 | 0.182298761 | -4.737515195 |
| 1455639_at   | -0.112567053 | 5.386196045 | -1.440036362 | 0.182304367 | 0.182304367 | -4.737537787 |
| 1437898_at   | -0.144611274 | 3.547294875 | -1.44001942  | 0.182309036 | 0.182309036 | -4.7375566   |
| 1441926_x_at | -0.108684845 | 4.844203284 | -1.43996014  | 0.182325373 | 0.182325373 | -4.737622423 |
| 1443095_at   | 0.201655825  | 4.306397957 | 1.43995509   | 0.182326764 | 0.182326764 | -4.73762803  |
| 1446490_at   | 0.206906743  | 5.996317756 | 1.43990191   | 0.182341421 | 0.182341421 | -4.737687078 |
| 1454598_at   | -0.127750545 | 3.492166983 | -1.43977051  | 0.182377639 | 0.182377639 | -4.737832973 |
| 1432968_at   | -0.098015774 | 6.908469152 | -1.439753472 | 0.182382336 | 0.182382336 | -4.73785189  |
| 1430370_at   | 0.157123547  | 6.524094388 | 1.439740605  | 0.182385883 | 0.182385883 | -4.737866176 |
| 1439437_x_at | -0.101179211 | 4.955642514 | -1.439636622 | 0.18241455  | 0.18241455  | -4.737981621 |
| 1425218_a_at | -0.098741418 | 4.474050333 | -1.439577852 | 0.182430754 | 0.182430754 | -4.738046868 |
| 1421715_at   | -0.108278218 | 5.060059923 | -1.439272864 | 0.182514865 | 0.182514865 | -4.738385444 |
| 1435792_at   | -0.150790302 | 3.628914334 | -1.439254635 | 0.182519893 | 0.182519893 | -4.738405678 |
| 1422671_s_at | -0.142186899 | 8.187102657 | -1.439182219 | 0.18253987  | 0.18253987  | -4.738486062 |
| 1446941_at   | 0.209915157  | 5.972292934 | 1.439046423  | 0.182577335 | 0.182577335 | -4.738636794 |
| 1422963_at   | 0.109836332  | 3.805009854 | 1.438972764  | 0.182597661 | 0.182597661 | -4.738718551 |
| 1429346_a_at | 0.100993942  | 5.741095634 | 1.438858788  | 0.182629114 | 0.182629114 | -4.738845051 |
| 1449871_at   | -0.300820843 | 4.43592437  | -1.438801118 | 0.182645031 | 0.182645031 | -4.738909057 |
| 1454647_at   | 0.101288586  | 8.449647581 | 1.438716573  | 0.182668367 | 0.182668367 | -4.739002887 |
| 1442310_at   | -0.100240085 | 6.302547375 | -1.438630614 | 0.182692097 | 0.182692097 | -4.739098283 |
| 1427537_at   | 0.255937273  | 6.994190595 | 1.438456723  | 0.182740108 | 0.182740108 | -4.739291254 |
| 1449414_at   | 0.161380645  | 6.762077136 | 1.438275712  | 0.182790097 | 0.182790097 | -4.739492112 |
| 1427741_x_at | -0.12458309  | 4.322990828 | -1.438113713 | 0.182834846 | 0.182834846 | -4.739671861 |
| 1445897_s_at | 0.16945702   | 7.935972507 | 1.438085744  | 0.182842572 | 0.182842572 | -4.739702893 |
| 1419735_at   | -0.145185378 | 4.369235133 | -1.438066261 | 0.182847955 | 0.182847955 | -4.73972451  |
| 1445048_at   | 0.158874282  | 5.004532167 | 1.438042944  | 0.182854397 | 0.182854397 | -4.73975038  |
| 1459757_x_at | 0.156595891  | 6.77253212  | 1.437955552  | 0.182878543 | 0.182878543 | -4.739847339 |
| 1444657_at   | -0.156204205 | 5.985760765 | -1.437927471 | 0.182886302 | 0.182886302 | -4.739878494 |
| 1458933_at   | 0.180367429  | 5.511932704 | 1.437773422  | 0.182928874 | 0.182928874 | -4.740049398 |
| 1439095_at   | 0.206501249  | 7.727912294 | 1.437748529  | 0.182935754 | 0.182935754 | -4.740077014 |
| 1427099_at   | -0.153089557 | 7.76932915  | -1.437679414 | 0.182954857 | 0.182954857 | -4.740153686 |
| 1454885_at   | 0.203769009  | 5.346854462 | 1.437652151  | 0.182962393 | 0.182962393 | -4.74018393  |
| 1454003_at   | 0.104991492  | 4.529980419 | 1.437631128  | 0.182968205 | 0.182968205 | -4.740207252 |
| 1458416_at   | -0.120827813 | 4.722855978 | -1.437443212 | 0.183020157 | 0.183020157 | -4.740415701 |
| 1454962_at   | 0.131384851  | 7.352298268 | 1.437437101  | 0.183021846 | 0.183021846 | -4.74042248  |

|              |              |             |              |             |             |              |
|--------------|--------------|-------------|--------------|-------------|-------------|--------------|
| 1454731_at   | -0.139301264 | 8.527453086 | -1.437408324 | 0.183029803 | 0.183029803 | -4.740454399 |
| 1450946_at   | 0.122602317  | 4.033774062 | 1.437369166  | 0.183040631 | 0.183040631 | -4.740497834 |
| 1448138_at   | -0.124986577 | 8.808219178 | -1.437322474 | 0.183053543 | 0.183053543 | -4.740549624 |
| 1450034_at   | 0.137015525  | 7.225726034 | 1.437209423  | 0.183084809 | 0.183084809 | -4.740675014 |
| 1445835_at   | -0.097131946 | 4.675806258 | -1.437095685 | 0.183116269 | 0.183116269 | -4.740801161 |
| 1444563_at   | -0.134751749 | 5.510154371 | -1.436858002 | 0.183182028 | 0.183182028 | -4.741064756 |
| 1458754_at   | -0.12909363  | 3.599116357 | -1.436822719 | 0.183191791 | 0.183191791 | -4.741103882 |
| 1424207_at   | 0.152591508  | 9.644757919 | 1.436816037  | 0.18319364  | 0.18319364  | -4.741111293 |
| 1435128_at   | -0.117297798 | 4.145120677 | -1.436815942 | 0.183193667 | 0.183193667 | -4.741111398 |
| 1456954_at   | 0.127924543  | 5.773069429 | 1.436747421  | 0.183212629 | 0.183212629 | -4.741187382 |
| 1428978_at   | 0.128482475  | 5.116752346 | 1.436695703  | 0.183226942 | 0.183226942 | -4.741244733 |
| 1458056_at   | 0.127418197  | 8.32271609  | 1.436646399  | 0.183240588 | 0.183240588 | -4.741299405 |
| 1452006_x_at | -0.090130822 | 3.82737537  | -1.436446089 | 0.183296038 | 0.183296038 | -4.741521514 |
| 1435980_x_at | 0.192187488  | 4.833112277 | 1.436240397  | 0.183352993 | 0.183352993 | -4.74174957  |
| 1426590_at   | -0.113265948 | 7.633326759 | -1.436181417 | 0.183369327 | 0.183369327 | -4.74181496  |
| 1420782_at   | -0.151278932 | 4.349092578 | -1.436180327 | 0.183369629 | 0.183369629 | -4.741816169 |
| 1450033_a_at | 0.132037778  | 7.7207182   | 1.43617003   | 0.183372481 | 0.183372481 | -4.741827584 |
| 1418488_s_at | 0.204551348  | 7.65442679  | 1.436150734  | 0.183377825 | 0.183377825 | -4.741848977 |
| 1417033_at   | -0.109506852 | 6.892827798 | -1.436114088 | 0.183387975 | 0.183387975 | -4.741889603 |
| 1417307_at   | 0.12272751   | 7.797035622 | 1.436022551  | 0.183413331 | 0.183413331 | -4.741991083 |
| 1449947_s_at | 0.120297454  | 8.787370512 | 1.436004127  | 0.183418434 | 0.183418434 | -4.742011507 |
| 1446593_at   | 0.111058407  | 6.027956002 | 1.435813287  | 0.183471307 | 0.183471307 | -4.742223059 |
| 1452345_at   | -0.121412833 | 3.749777499 | -1.435696113 | 0.183503776 | 0.183503776 | -4.742352942 |
| 1460023_at   | -0.130781079 | 5.341118726 | -1.435685435 | 0.183506736 | 0.183506736 | -4.742364778 |
| 1420862_at   | 0.085573915  | 8.254340143 | 1.435379111  | 0.183591645 | 0.183591645 | -4.742704297 |
| 1423779_at   | -0.099580958 | 8.221012321 | -1.435253326 | 0.183626521 | 0.183626521 | -4.7428437   |
| 1441523_at   | -0.135704201 | 4.871397807 | -1.435095872 | 0.183670185 | 0.183670185 | -4.74301819  |
| 1446335_at   | -0.170500116 | 4.043238282 | -1.435058126 | 0.183680654 | 0.183680654 | -4.743060019 |
| 1416749_at   | -0.215323722 | 9.484268789 | -1.434968541 | 0.183705503 | 0.183705503 | -4.743159291 |
| 1431355_s_at | 0.13376274   | 8.082410106 | 1.434829489  | 0.183744078 | 0.183744078 | -4.743313371 |
| 1457433_x_at | -0.105255403 | 6.003727921 | -1.434798008 | 0.183752812 | 0.183752812 | -4.743348253 |
| 1417184_s_at | 0.095972227  | 13.86507981 | 1.434767468  | 0.183761286 | 0.183761286 | -4.743382092 |
| 1448815_at   | 0.115494916  | 4.976892206 | 1.434617081  | 0.183803017 | 0.183803017 | -4.743548718 |
| 1433384_at   | 0.099516368  | 4.406206505 | 1.434577432  | 0.183814021 | 0.183814021 | -4.743592647 |
| 1430987_s_at | 0.107088754  | 8.257002564 | 1.434488674  | 0.183838655 | 0.183838655 | -4.743690982 |
| 1447097_at   | -0.139301505 | 3.463302734 | -1.434442428 | 0.183851492 | 0.183851492 | -4.743742218 |
| 1451443_at   | -0.169262106 | 5.252764056 | -1.43441532  | 0.183859017 | 0.183859017 | -4.74377225  |
| 1424738_at   | -0.126501868 | 7.210595185 | -1.434304981 | 0.183889648 | 0.183889648 | -4.743894487 |
| 1432813_at   | -0.145879151 | 3.817834693 | -1.434210143 | 0.183915979 | 0.183915979 | -4.743999547 |
| 1425260_at   | -0.125033972 | 4.202468004 | -1.43414814  | 0.183933196 | 0.183933196 | -4.744068231 |
| 1446060_at   | -0.113780373 | 4.371090402 | -1.43396386  | 0.183984374 | 0.183984374 | -4.744272356 |
| 1419923_at   | -0.095002816 | 6.42826579  | -1.433946205 | 0.183989278 | 0.183989278 | -4.744291912 |
| 1419147_at   | -0.23448765  | 5.080438008 | -1.433888498 | 0.184005308 | 0.184005308 | -4.74435583  |
| 1421262_at   | 0.168696365  | 5.089021176 | 1.433813453  | 0.184026155 | 0.184026155 | -4.74443895  |
| 1429659_at   | 0.183588985  | 5.582956911 | 1.433652056  | 0.184070997 | 0.184070997 | -4.744617705 |
| 1422210_at   | -0.136331404 | 4.835865776 | -1.433387351 | 0.184144562 | 0.184144562 | -4.744910853 |
| 1433610_at   | -0.100591446 | 3.416344332 | -1.433343347 | 0.184156794 | 0.184156794 | -4.744959581 |
| 1444386_at   | 0.146382099  | 4.703071703 | 1.433322717  | 0.184162529 | 0.184162529 | -4.744982427 |
| 1453505_a_at | 0.145544839  | 4.790899239 | 1.433191812  | 0.184198922 | 0.184198922 | -4.745127382 |
| 1427176_s_at | 0.10559214   | 8.137477787 | 1.433186514  | 0.184200395 | 0.184200395 | -4.745133249 |
| 1450041_a_at | -0.092965774 | 3.849190284 | -1.433160981 | 0.184207494 | 0.184207494 | -4.74516152  |
| 1432809_at   | -0.100560652 | 3.446570243 | -1.432915924 | 0.184275642 | 0.184275642 | -4.745432856 |
| 1431896_at   | 0.221574836  | 6.718560846 | 1.432721592  | 0.184329699 | 0.184329699 | -4.745648007 |

|                    |              |             |              |             |             |              |
|--------------------|--------------|-------------|--------------|-------------|-------------|--------------|
| 1433760_a_at       | -0.106391249 | 7.749431008 | -1.43266522  | 0.184345382 | 0.184345382 | -4.745710414 |
| 1440975_at         | 0.128034643  | 7.990564193 | 1.43265782   | 0.184347441 | 0.184347441 | -4.745718607 |
| 1418197_at         | -0.127480818 | 4.099645325 | -1.432572186 | 0.184371268 | 0.184371268 | -4.745813408 |
| 1426426_at         | 0.109952359  | 8.961792591 | 1.432239883  | 0.184463754 | 0.184463754 | -4.746181248 |
| 1442401_at         | -0.128703558 | 4.83300795  | -1.431931889 | 0.18454951  | 0.18454951  | -4.746522136 |
| 1453266_at         | 0.157378296  | 6.540100427 | 1.431781878  | 0.18459129  | 0.18459129  | -4.746688152 |
| 1418915_at         | 0.123985783  | 7.687272499 | 1.431687748  | 0.184617511 | 0.184617511 | -4.74679232  |
| 1445380_at         | -0.090590602 | 6.681983404 | -1.431645521 | 0.184629275 | 0.184629275 | -4.746839048 |
| 1420928_at         | 0.133625157  | 8.496388751 | 1.431528029  | 0.18466201  | 0.18466201  | -4.746969061 |
| 1441810_at         | -0.116326575 | 4.067424865 | -1.431487417 | 0.184673326 | 0.184673326 | -4.747014    |
| 1427417_at         | -0.128470569 | 4.047083533 | -1.431466149 | 0.184679253 | 0.184679253 | -4.747037534 |
| 1438024_at         | -0.115073232 | 8.527083053 | -1.431441316 | 0.184686172 | 0.184686172 | -4.747065011 |
| 1421517_at         | 0.130609127  | 3.518145187 | 1.431359361  | 0.184709012 | 0.184709012 | -4.747155694 |
| 1433076_at         | -0.118973116 | 5.131921817 | -1.431333238 | 0.184716292 | 0.184716292 | -4.747184598 |
| 1447010_at         | -0.127586067 | 6.840243558 | -1.431275267 | 0.18473245  | 0.18473245  | -4.747248739 |
| 1452760_at         | 0.090159858  | 9.033584524 | 1.43119454   | 0.184754952 | 0.184754952 | -4.747338057 |
| 1448177_at         | 0.148272099  | 4.375323365 | 1.431006921  | 0.184807258 | 0.184807258 | -4.747545629 |
| AFFX-r2-Ec-bioB-3_ | 0.141856781  | 7.960502845 | 1.4310048    | 0.18480785  | 0.18480785  | -4.747547976 |
| 1453655_at         | -0.123848928 | 4.826737228 | -1.430950711 | 0.184822932 | 0.184822932 | -4.747607814 |
| 1457306_at         | -0.280102314 | 7.052126693 | -1.430926717 | 0.184829622 | 0.184829622 | -4.747634358 |
| 1437151_at         | 0.099278002  | 11.11440369 | 1.430891577  | 0.184839422 | 0.184839422 | -4.747673233 |
| 1449512_a_at       | 0.313270119  | 5.756300146 | 1.430751854  | 0.184878389 | 0.184878389 | -4.747827798 |
| 1448893_at         | -0.156805104 | 8.86235905  | -1.430697844 | 0.184893454 | 0.184893454 | -4.747887542 |
| 1419693_at         | -0.257647873 | 8.604575751 | -1.430614051 | 0.184916828 | 0.184916828 | -4.747980229 |
| 1439557_s_at       | -0.207061929 | 8.193428965 | -1.43061179  | 0.184917459 | 0.184917459 | -4.74798273  |
| 1444286_at         | 0.145740622  | 5.185141456 | 1.430281692  | 0.185009565 | 0.185009565 | -4.748347835 |
| 1424194_at         | 0.118897419  | 8.05372928  | 1.430140931  | 0.185048854 | 0.185048854 | -4.74850351  |
| 1456620_at         | 0.092736454  | 7.44914301  | 1.430131486  | 0.18505149  | 0.18505149  | -4.748513955 |
| 1447964_at         | -0.102992974 | 5.395703192 | -1.430129611 | 0.185052014 | 0.185052014 | -4.748516028 |
| 1453373_at         | -0.119930593 | 3.792799844 | -1.430106523 | 0.185058459 | 0.185058459 | -4.748541562 |
| 1436864_at         | 0.147092754  | 6.475971288 | 1.430006046  | 0.185086509 | 0.185086509 | -4.748652676 |
| 1450219_at         | -0.135724603 | 4.124636343 | -1.429994785 | 0.185089653 | 0.185089653 | -4.74866513  |
| 1452379_at         | 0.242525214  | 7.665424222 | 1.42984029   | 0.185132791 | 0.185132791 | -4.748835972 |
| 1459395_at         | 0.209197305  | 4.737085769 | 1.429819981  | 0.185138462 | 0.185138462 | -4.748858429 |
| 1437291_at         | -0.253812556 | 9.419124603 | -1.429800137 | 0.185144004 | 0.185144004 | -4.748880372 |
| 1429229_s_at       | -0.132197928 | 7.108187439 | -1.42971587  | 0.185167538 | 0.185167538 | -4.74897355  |
| 1427057_at         | -0.098815327 | 7.545330541 | -1.42971044  | 0.185169054 | 0.185169054 | -4.748979553 |
| 1453547_at         | -0.107417634 | 4.474893791 | -1.429613681 | 0.18519608  | 0.18519608  | -4.74908654  |
| 1454635_at         | 0.13976949   | 8.764741818 | 1.429574859  | 0.185206924 | 0.185206924 | -4.749129463 |
| 1416759_at         | 0.128144988  | 6.928093668 | 1.429474422  | 0.185234983 | 0.185234983 | -4.74924051  |
| 1439185_x_at       | 0.108102418  | 7.130017393 | 1.429466517  | 0.185237191 | 0.185237191 | -4.749249249 |
| 1419009_at         | -0.143619405 | 4.464811376 | -1.429402301 | 0.185255133 | 0.185255133 | -4.749320246 |
| 1455383_at         | -0.205303547 | 4.586268438 | -1.429310682 | 0.185280733 | 0.185280733 | -4.749421536 |
| 1430129_a_at       | 0.111781639  | 8.316384525 | 1.428995492  | 0.185368828 | 0.185368828 | -4.749769966 |
| 1443376_at         | -0.14081491  | 4.007089247 | -1.428989426 | 0.185370524 | 0.185370524 | -4.749776672 |
| 1434582_at         | 0.243787061  | 6.29029246  | 1.428777348  | 0.18542982  | 0.18542982  | -4.75001109  |
| 1443049_at         | -0.111006848 | 6.126585843 | -1.428572849 | 0.185487012 | 0.185487012 | -4.750237112 |
| 1420555_at         | -0.191171173 | 5.241313381 | -1.428477132 | 0.185513787 | 0.185513787 | -4.750342895 |
| 1443545_at         | 0.090671023  | 4.468030437 | 1.428451664  | 0.185520911 | 0.185520911 | -4.750371042 |
| 1433586_at         | -0.199125036 | 7.110844394 | -1.428435741 | 0.185525366 | 0.185525366 | -4.750388639 |
| 1439575_at         | -0.149318136 | 3.701249203 | -1.428384234 | 0.185539776 | 0.185539776 | -4.75044556  |
| 1424386_at         | 0.146681023  | 4.918279107 | 1.428045494  | 0.185634568 | 0.185634568 | -4.750819879 |
| 1459939_at         | -0.098316447 | 4.094468798 | -1.427986963 | 0.185650951 | 0.185650951 | -4.750884552 |

|              |              |             |              |             |             |              |
|--------------|--------------|-------------|--------------|-------------|-------------|--------------|
| 1439638_at   | 0.206368185  | 8.226955246 | 1.427942419  | 0.18566342  | 0.18566342  | -4.75093377  |
| 1443515_at   | 0.124337732  | 4.178290958 | 1.42791634   | 0.185670721 | 0.185670721 | -4.750962585 |
| 1423354_at   | 0.133434119  | 6.576545126 | 1.427817062  | 0.185698515 | 0.185698515 | -4.751072274 |
| 1454292_at   | 0.142524446  | 3.764070183 | 1.427712269  | 0.185727858 | 0.185727858 | -4.751188054 |
| 1456534_at   | -0.185482174 | 6.509132472 | -1.42766825  | 0.185740184 | 0.185740184 | -4.751236685 |
| 1420057_at   | -0.12336408  | 5.123619371 | -1.427647251 | 0.185746065 | 0.185746065 | -4.751259885 |
| 1456915_at   | 0.119276305  | 3.935270227 | 1.427535124  | 0.185777468 | 0.185777468 | -4.751383756 |
| 1453272_at   | 0.102394527  | 3.833415064 | 1.427267575  | 0.185852417 | 0.185852417 | -4.751679308 |
| 1420759_s_at | 0.12186967   | 3.192606782 | 1.427190478  | 0.185874019 | 0.185874019 | -4.751764468 |
| 1429228_at   | -0.236233256 | 6.762630705 | -1.427177242 | 0.185877728 | 0.185877728 | -4.751779088 |
| 1459084_at   | 0.140273041  | 3.542368599 | 1.427130373  | 0.185890862 | 0.185890862 | -4.751830858 |
| 1417540_at   | 0.134732524  | 8.294217412 | 1.427069785  | 0.185907841 | 0.185907841 | -4.751897778 |
| 1442218_at   | -0.15348339  | 3.900838488 | -1.426969163 | 0.185936043 | 0.185936043 | -4.752008914 |
| 1430243_at   | -0.139600306 | 4.907264077 | -1.4269518   | 0.18594091  | 0.18594091  | -4.75202809  |
| 1432747_at   | 0.114902271  | 3.961989376 | 1.426858375  | 0.185967098 | 0.185967098 | -4.752131273 |
| 1427137_at   | 0.113073392  | 3.693963863 | 1.426762455  | 0.185993989 | 0.185993989 | -4.752237205 |
| 1439369_x_at | -0.138523826 | 6.28367052  | -1.426678327 | 0.186017577 | 0.186017577 | -4.752330113 |
| 1417775_at   | -0.114574187 | 8.138385822 | -1.426575062 | 0.186046534 | 0.186046534 | -4.752444149 |
| 1454846_at   | 0.109557441  | 8.033600177 | 1.426370173  | 0.186104    | 0.186104    | -4.752670395 |
| 1433077_at   | 0.156761676  | 3.82148818  | 1.426364302  | 0.186105647 | 0.186105647 | -4.752676878 |
| 1438497_at   | -0.125048422 | 6.066079512 | -1.426310883 | 0.186120632 | 0.186120632 | -4.752735862 |
| 1422642_at   | -0.098818671 | 8.732489715 | -1.426298485 | 0.18612411  | 0.18612411  | -4.752749551 |
| 1432205_a_at | 0.195536706  | 4.941578646 | 1.42627675   | 0.186130207 | 0.186130207 | -4.75277355  |
| 1442894_at   | -0.222304955 | 5.782905868 | -1.426076083 | 0.18618651  | 0.18618651  | -4.752995106 |
| 1455807_at   | -0.143894915 | 5.66064087  | -1.425975198 | 0.186214822 | 0.186214822 | -4.753106487 |
| 1460268_at   | -0.098074363 | 3.619507834 | -1.425838798 | 0.186253106 | 0.186253106 | -4.75325707  |
| 1438240_at   | -0.147215221 | 4.310912745 | -1.425741616 | 0.186280387 | 0.186280387 | -4.753364351 |
| 1440239_at   | -0.160227901 | 5.212474898 | -1.425737816 | 0.186281454 | 0.186281454 | -4.753368546 |
| 1426971_at   | 0.087606743  | 5.361602906 | 1.425631091  | 0.186311418 | 0.186311418 | -4.753486357 |
| 1458876_at   | -0.117971972 | 5.264433183 | -1.425616045 | 0.186315643 | 0.186315643 | -4.753502966 |
| 1439900_at   | 0.144149954  | 5.030286137 | 1.425584042  | 0.186324629 | 0.186324629 | -4.753538292 |
| 1431758_at   | -0.146831292 | 4.028842779 | -1.425561233 | 0.186331033 | 0.186331033 | -4.753563469 |
| 1452788_at   | 0.176350601  | 7.878701368 | 1.42540848   | 0.186373931 | 0.186373931 | -4.753732076 |
| 1453769_at   | 0.157813098  | 8.222963962 | 1.425335131  | 0.186394533 | 0.186394533 | -4.753813033 |
| 1418648_at   | 0.148796325  | 6.612121857 | 1.425320355  | 0.186398683 | 0.186398683 | -4.753829342 |
| 1439959_at   | 0.146714475  | 5.851381336 | 1.425088873  | 0.186463714 | 0.186463714 | -4.754084819 |
| 1432796_at   | 0.110365753  | 3.479755233 | 1.425081169  | 0.186465879 | 0.186465879 | -4.754093321 |
| 1434523_x_at | 0.101105069  | 12.27653876 | 1.425069222  | 0.186469236 | 0.186469236 | -4.754106505 |
| 1419948_at   | -0.096818464 | 5.22061466  | -1.424973883 | 0.186496026 | 0.186496026 | -4.754211719 |
| 1420785_at   | 0.098658841  | 6.101090317 | 1.424950089  | 0.186502713 | 0.186502713 | -4.754237976 |
| 1428537_at   | 0.123103702  | 11.08891975 | 1.42475197   | 0.186558396 | 0.186558396 | -4.7544566   |
| 1452617_at   | 0.11055058   | 5.226825382 | 1.424726057  | 0.186565681 | 0.186565681 | -4.754485193 |
| 1452665_at   | 0.163852556  | 7.798502298 | 1.42468968   | 0.186575907 | 0.186575907 | -4.754525333 |
| 1446420_at   | -0.132373645 | 4.117223623 | -1.424564641 | 0.186611061 | 0.186611061 | -4.7546633   |
| 1442703_at   | -0.122533035 | 6.875358384 | -1.424533694 | 0.186619762 | 0.186619762 | -4.754697446 |
| 1420173_at   | -0.137813783 | 3.969961777 | -1.424517783 | 0.186624236 | 0.186624236 | -4.754715001 |
| 1429252_at   | 0.098564171  | 7.475726438 | 1.424506078  | 0.186627527 | 0.186627527 | -4.754727915 |
| 1419271_at   | 0.161642968  | 4.31159872  | 1.424392875  | 0.186659361 | 0.186659361 | -4.754852813 |
| 1423253_at   | 0.137659567  | 5.525980428 | 1.424205131  | 0.186712166 | 0.186712166 | -4.75505994  |
| 1445849_at   | 0.106590415  | 3.285869129 | 1.424195444  | 0.186714891 | 0.186714891 | -4.755070627 |
| 1416798_a_at | -0.096326945 | 8.592124515 | -1.424166197 | 0.186723118 | 0.186723118 | -4.755102891 |
| 1416862_at   | 0.094391024  | 7.92721959  | 1.424084143  | 0.186746203 | 0.186746203 | -4.755193411 |
| 1419496_at   | 0.098545131  | 3.588249373 | 1.424082865  | 0.186746562 | 0.186746562 | -4.755194821 |

|              |              |             |              |             |             |              |
|--------------|--------------|-------------|--------------|-------------|-------------|--------------|
| 1460331_at   | -0.105704299 | 10.75199285 | -1.424046347 | 0.186756836 | 0.186756836 | -4.755235105 |
| 1454270_at   | -0.133607934 | 4.856346971 | -1.423947358 | 0.186784689 | 0.186784689 | -4.7553443   |
| 1451870_a_at | -0.124501612 | 4.383299159 | -1.423672029 | 0.186862178 | 0.186862178 | -4.755647992 |
| 1458993_at   | 0.128134375  | 3.205275246 | 1.423442271  | 0.186926863 | 0.186926863 | -4.755901393 |
| 1441272_at   | -0.086929941 | 7.975363779 | -1.423362248 | 0.186949397 | 0.186949397 | -4.755989644 |
| 1434555_at   | 0.10864481   | 10.27713493 | 1.423192968  | 0.186997072 | 0.186997072 | -4.756176322 |
| 1435531_at   | 0.097155453  | 8.321841454 | 1.422996659  | 0.187052372 | 0.187052372 | -4.756392789 |
| 1441038_at   | -0.116586873 | 6.558553822 | -1.422961812 | 0.18706219  | 0.18706219  | -4.756431213 |
| 1456677_at   | 0.1152007    | 5.33268032  | 1.422926702  | 0.187072083 | 0.187072083 | -4.756469926 |
| 1417390_at   | 0.09814242   | 9.341513366 | 1.422677678  | 0.18714226  | 0.18714226  | -4.756744489 |
| 1453172_at   | -0.239787052 | 9.10934827  | -1.422585394 | 0.187168273 | 0.187168273 | -4.75684623  |
| 1460049_s_at | -0.231022795 | 8.583040881 | -1.422542622 | 0.18718033  | 0.18718033  | -4.756893383 |
| 1418137_at   | -0.089723389 | 9.791854101 | -1.422496854 | 0.187193232 | 0.187193232 | -4.756943839 |
| 1426172_a_at | 0.09881933   | 4.758398092 | 1.422397529  | 0.187221236 | 0.187221236 | -4.757053334 |
| 1433174_a_at | -0.137135843 | 7.203352973 | -1.422383408 | 0.187225217 | 0.187225217 | -4.7570689   |
| 1430228_at   | -0.150093625 | 7.142801371 | -1.422344407 | 0.187236214 | 0.187236214 | -4.757111893 |
| 1419348_at   | -0.122034605 | 3.306385073 | -1.422306211 | 0.187246985 | 0.187246985 | -4.757153998 |
| 1438833_at   | 0.434360516  | 6.333795925 | 1.422247447  | 0.187263557 | 0.187263557 | -4.757218775 |
| 1431261_at   | -0.118003672 | 3.714731507 | -1.42222261  | 0.187270561 | 0.187270561 | -4.757246151 |
| 1422321_a_at | -0.216468834 | 6.961278159 | -1.42211315  | 0.187301433 | 0.187301433 | -4.757366805 |
| 1452270_s_at | -0.134897872 | 5.318669546 | -1.422105299 | 0.187303648 | 0.187303648 | -4.757375459 |
| 1437971_at   | -0.120879056 | 3.507361596 | -1.421980487 | 0.187338856 | 0.187338856 | -4.757513028 |
| 1443470_at   | -0.135909321 | 3.98610083  | -1.421945113 | 0.187348835 | 0.187348835 | -4.757552016 |
| 1439317_at   | 0.092484664  | 6.465605211 | 1.421930033  | 0.187353089 | 0.187353089 | -4.757568636 |
| 1419373_at   | 0.163624786  | 4.807351114 | 1.421910502  | 0.1873586   | 0.1873586   | -4.757590163 |
| 1452940_x_at | -0.132854244 | 6.379328397 | -1.421887456 | 0.187365102 | 0.187365102 | -4.757615563 |
| 1458642_at   | 0.108619815  | 3.595762844 | 1.421629363  | 0.187437933 | 0.187437933 | -4.7579      |
| 1459672_at   | -0.107100494 | 3.894195914 | -1.421520659 | 0.187468616 | 0.187468616 | -4.75801979  |
| 1422949_at   | -0.127055239 | 4.463780449 | -1.421371037 | 0.187510855 | 0.187510855 | -4.758184664 |
| 1433332_at   | -0.091127726 | 4.460568178 | -1.42135089  | 0.187516543 | 0.187516543 | -4.758206863 |
| 1423693_at   | -0.119286864 | 5.090943926 | -1.421326055 | 0.187523555 | 0.187523555 | -4.758234229 |
| 1445496_at   | -0.161615444 | 4.2988186   | -1.420986782 | 0.187619369 | 0.187619369 | -4.758608038 |
| 1438593_at   | 0.139384014  | 3.394153829 | 1.42097841   | 0.187621734 | 0.187621734 | -4.758617262 |
| 1420537_at   | 0.089550527  | 3.660174342 | 1.420976639  | 0.187622234 | 0.187622234 | -4.758619213 |
| 1457958_at   | 0.111480029  | 6.668447313 | 1.420920489  | 0.187638096 | 0.187638096 | -4.758681074 |
| 1421724_at   | -0.107683777 | 3.4230986   | -1.420811287 | 0.187668947 | 0.187668947 | -4.758801378 |
| 1435807_at   | 0.18569528   | 7.282169033 | 1.420744178  | 0.187687909 | 0.187687909 | -4.758875306 |
| 1448471_a_at | 0.113959777  | 6.260598371 | 1.420651946  | 0.187713972 | 0.187713972 | -4.758976908 |
| 1433380_at   | 0.093649239  | 3.667739404 | 1.420363592  | 0.187795474 | 0.187795474 | -4.759294529 |
| 1435772_at   | -0.108998622 | 7.336138833 | -1.420273632 | 0.187820907 | 0.187820907 | -4.759393613 |
| 1439704_at   | -0.106509647 | 7.496635163 | -1.420233401 | 0.187832282 | 0.187832282 | -4.759437921 |
| 1421281_at   | 0.206313716  | 6.717744259 | 1.420136613  | 0.187859651 | 0.187859651 | -4.75954452  |
| 1434853_x_at | 0.119428991  | 9.273531233 | 1.420132387  | 0.187860845 | 0.187860845 | -4.759549173 |
| 1430096_at   | -0.110034735 | 4.05374276  | -1.420101229 | 0.187869657 | 0.187869657 | -4.759583489 |
| 1438030_at   | 0.112745578  | 7.011667908 | 1.420086262  | 0.187873889 | 0.187873889 | -4.759599972 |
| 1417394_at   | -0.138806448 | 10.53712784 | -1.419985463 | 0.187902397 | 0.187902397 | -4.759710979 |
| 1418824_at   | 0.11972176   | 4.658866034 | 1.419974557  | 0.187905482 | 0.187905482 | -4.75972299  |
| 1449957_at   | -0.169736314 | 9.387390535 | -1.419889085 | 0.187929659 | 0.187929659 | -4.759817115 |
| 1420651_at   | 0.134957525  | 6.599002302 | 1.419871995  | 0.187934493 | 0.187934493 | -4.759835935 |
| 1434077_at   | -0.206837016 | 5.906174482 | -1.419674937 | 0.187990244 | 0.187990244 | -4.760052927 |
| 1431077_at   | -0.159096502 | 4.800590914 | -1.419651476 | 0.187996882 | 0.187996882 | -4.76007876  |
| 1430903_at   | -0.115074402 | 4.745418132 | -1.419563688 | 0.188021724 | 0.188021724 | -4.760175422 |
| 1430142_at   | -0.098773146 | 5.107001548 | -1.419478702 | 0.188045776 | 0.188045776 | -4.760268995 |

|              |              |             |              |             |             |              |
|--------------|--------------|-------------|--------------|-------------|-------------|--------------|
| 1448110_at   | 0.139422146  | 6.721853797 | 1.41944406   | 0.188055581 | 0.188055581 | -4.760307137 |
| 1456499_at   | 0.157719349  | 5.527434701 | 1.419323187  | 0.188089795 | 0.188089795 | -4.760440215 |
| 1444559_at   | -0.120698265 | 3.515678885 | -1.419294646 | 0.188097874 | 0.188097874 | -4.760471638 |
| 1446214_at   | -0.126413846 | 4.957009019 | -1.419290565 | 0.18809903  | 0.18809903  | -4.76047613  |
| 1446858_at   | -0.096631866 | 3.568398808 | -1.41922679  | 0.188117085 | 0.188117085 | -4.760546342 |
| 1417289_at   | 0.248130962  | 5.428989288 | 1.419088904  | 0.188156126 | 0.188156126 | -4.760698138 |
| 1423635_at   | -0.13651712  | 8.605090343 | -1.418977456 | 0.188187686 | 0.188187686 | -4.760820821 |
| 1437030_at   | -0.20114     | 5.059556272 | -1.418822291 | 0.188231635 | 0.188231635 | -4.76099162  |
| 1433671_at   | -0.117914581 | 7.969906048 | -1.418746709 | 0.188253046 | 0.188253046 | -4.761074814 |
| 1425818_at   | 0.118964939  | 4.817509186 | 1.418722252  | 0.188259974 | 0.188259974 | -4.761101733 |
| 1434516_at   | 0.098042479  | 8.344664261 | 1.418689591  | 0.188269227 | 0.188269227 | -4.761137681 |
| 1423402_at   | 0.106080406  | 6.902896307 | 1.41866488   | 0.188276228 | 0.188276228 | -4.76116488  |
| 1431759_at   | -0.116984651 | 4.860192718 | -1.418550506 | 0.188308635 | 0.188308635 | -4.761290762 |
| 1452227_at   | -0.202944383 | 4.98064034  | -1.418543613 | 0.188310588 | 0.188310588 | -4.761298348 |
| 1454674_at   | -0.131220991 | 8.848903102 | -1.418442574 | 0.188339221 | 0.188339221 | -4.761409549 |
| 1432873_at   | 0.106201208  | 3.363952063 | 1.418278847  | 0.188385627 | 0.188385627 | -4.761589732 |
| 1447399_at   | -0.15582984  | 5.774889174 | -1.418261101 | 0.188390658 | 0.188390658 | -4.761609261 |
| 1440359_at   | -0.153405571 | 5.331248285 | -1.418239613 | 0.188396749 | 0.188396749 | -4.761632908 |
| 1439642_at   | 0.152555626  | 4.969293205 | 1.418221285  | 0.188401944 | 0.188401944 | -4.761653076 |
| 1435510_at   | -0.199402679 | 5.024641688 | -1.418098889 | 0.188436645 | 0.188436645 | -4.761787764 |
| 1436056_at   | -0.123980512 | 7.121984137 | -1.418024778 | 0.188457658 | 0.188457658 | -4.761869313 |
| 1452752_at   | -0.111690942 | 8.977864867 | -1.417939403 | 0.188481868 | 0.188481868 | -4.761963254 |
| 1437885_at   | 0.141513998  | 8.347806627 | 1.417924935  | 0.188485971 | 0.188485971 | -4.761979173 |
| 1442767_s_at | 0.084852616  | 3.27276759  | 1.417863164  | 0.18850349  | 0.18850349  | -4.762047139 |
| 1443541_at   | 0.146335117  | 3.33730081  | 1.417731051  | 0.188540962 | 0.188540962 | -4.762192496 |
| 1446630_at   | -0.104228136 | 4.943248558 | -1.41771565  | 0.188545331 | 0.188545331 | -4.76220944  |
| 1417673_at   | 0.112560388  | 7.054502495 | 1.41769433   | 0.188551379 | 0.188551379 | -4.762232896 |
| 1421781_at   | -0.095626144 | 7.647278481 | -1.417659917 | 0.188561141 | 0.188561141 | -4.762270757 |
| 1436248_at   | 0.12018432   | 6.729405607 | 1.417608219  | 0.188575808 | 0.188575808 | -4.762327634 |
| 1455596_a_at | -0.106617033 | 6.665439478 | -1.417554435 | 0.188591068 | 0.188591068 | -4.762386805 |
| 1444463_at   | -0.256123451 | 4.685865228 | -1.417533939 | 0.188596883 | 0.188596883 | -4.762409353 |
| 1444958_at   | 0.137666817  | 3.907714117 | 1.417487354  | 0.188610101 | 0.188610101 | -4.762460602 |
| 1457407_at   | 0.174494376  | 5.949713343 | 1.41748682   | 0.188610253 | 0.188610253 | -4.76246119  |
| 1453631_at   | -0.131808265 | 3.795802554 | -1.417339474 | 0.188652067 | 0.188652067 | -4.76262328  |
| 1420093_s_at | 0.096013136  | 11.18699883 | 1.417334147  | 0.188653579 | 0.188653579 | -4.76262914  |
| 1428204_at   | 0.152587683  | 5.665978795 | 1.417313642  | 0.188659398 | 0.188659398 | -4.762651696 |
| 1434670_at   | 0.349274533  | 6.058682001 | 1.417306365  | 0.188661463 | 0.188661463 | -4.762659701 |
| 1453181_x_at | 0.187560001  | 6.915477265 | 1.417155897  | 0.188704174 | 0.188704174 | -4.762825214 |
| 1458720_at   | 0.108469437  | 3.553439973 | 1.417109338  | 0.188717391 | 0.188717391 | -4.762876426 |
| 1424542_at   | -0.146937586 | 7.952454912 | -1.417073441 | 0.188727582 | 0.188727582 | -4.76291591  |
| 1432320_at   | -0.099068267 | 4.126706872 | -1.417070395 | 0.188728447 | 0.188728447 | -4.762919261 |
| 1418492_at   | 0.179197302  | 7.939396273 | 1.417054821  | 0.188732868 | 0.188732868 | -4.76293639  |
| 1435353_a_at | -0.235972238 | 8.585823572 | -1.417048638 | 0.188734624 | 0.188734624 | -4.762943191 |
| 1443878_at   | 0.131227356  | 5.7076933   | 1.416939478  | 0.188765618 | 0.188765618 | -4.763063253 |
| 1453321_at   | 0.153420235  | 8.971358379 | 1.416903655  | 0.18877579  | 0.18877579  | -4.763102654 |
| 1453150_at   | 0.100788992  | 3.927676751 | 1.416665689  | 0.188843375 | 0.188843375 | -4.763364363 |
| 1433539_at   | -0.091086381 | 10.14687619 | -1.416622311 | 0.188855697 | 0.188855697 | -4.763412067 |
| 1416151_at   | 0.135965015  | 9.799018847 | 1.41661441   | 0.188857942 | 0.188857942 | -4.763420756 |
| 1436893_a_at | 0.118940907  | 9.053384829 | 1.416592674  | 0.188864117 | 0.188864117 | -4.763444659 |
| 1440501_at   | -0.15553182  | 4.468333743 | -1.416522608 | 0.188884022 | 0.188884022 | -4.763521708 |
| 1446842_at   | -0.103204444 | 3.774779065 | -1.416393475 | 0.188920713 | 0.188920713 | -4.763663707 |
| 1428792_at   | -0.168060234 | 6.669213753 | -1.41636754  | 0.188928082 | 0.188928082 | -4.763692225 |
| 1459533_at   | -0.095872089 | 3.427449266 | -1.416277126 | 0.188953776 | 0.188953776 | -4.763791641 |



|              |              |             |              |             |             |              |
|--------------|--------------|-------------|--------------|-------------|-------------|--------------|
| 1436050_x_at | -0.161799863 | 8.470428102 | -1.416264227 | 0.188957442 | 0.188957442 | -4.763805824 |
| 1444395_at   | -0.173893711 | 7.389347983 | -1.416256048 | 0.188959767 | 0.188959767 | -4.763814817 |
| 1440498_at   | -0.122492031 | 5.683946623 | -1.416118753 | 0.18899879  | 0.18899879  | -4.763965773 |
| 1437500_at   | 0.123104762  | 6.777697942 | 1.415953403  | 0.189045797 | 0.189045797 | -4.764147564 |
| 1444984_at   | -0.12730834  | 3.695572    | -1.41582307  | 0.189082856 | 0.189082856 | -4.764290848 |
| 1452863_at   | -0.117368004 | 4.386144749 | -1.415724606 | 0.189110857 | 0.189110857 | -4.76439909  |
| 1419508_at   | -0.110996694 | 5.827196698 | -1.415636145 | 0.189136017 | 0.189136017 | -4.764496333 |
| 1422366_at   | -0.123752302 | 3.773370304 | -1.415164659 | 0.189270164 | 0.189270164 | -4.765014561 |
| 1433439_at   | 0.098110215  | 9.650864622 | 1.415131591  | 0.189279575 | 0.189279575 | -4.765050904 |
| 1431839_a_at | -0.120717817 | 3.652100909 | -1.415059286 | 0.189300156 | 0.189300156 | -4.765130367 |
| 1422362_s_at | 0.186406672  | 4.296520017 | 1.414988155  | 0.189320403 | 0.189320403 | -4.765208537 |
| 1442925_at   | 0.188940927  | 4.129487163 | 1.414954292  | 0.189330044 | 0.189330044 | -4.765245751 |
| 1442589_at   | -0.118493013 | 4.066801583 | -1.414554721 | 0.189443824 | 0.189443824 | -4.765684816 |
| 1445152_at   | -0.1349412   | 6.630058147 | -1.414554106 | 0.189443999 | 0.189443999 | -4.76568549  |
| 1449923_at   | 0.114788305  | 4.169958257 | 1.414278922  | 0.189522394 | 0.189522394 | -4.765987831 |
| 1441654_at   | 0.11477363   | 3.733424164 | 1.414275487  | 0.189523373 | 0.189523373 | -4.765991605 |
| 1446969_at   | 0.174724458  | 6.439015282 | 1.414191905  | 0.189547189 | 0.189547189 | -4.766083427 |
| 1430419_at   | 0.097880453  | 3.787430204 | 1.414174552  | 0.189552134 | 0.189552134 | -4.766102491 |
| 1418444_a_at | -0.107340623 | 9.670301024 | -1.41401464  | 0.189597709 | 0.189597709 | -4.76627816  |
| 1435298_at   | 0.09969117   | 6.56953878  | 1.413935639  | 0.189620228 | 0.189620228 | -4.766364941 |
| 1434226_at   | -0.130682412 | 3.890308865 | -1.413846111 | 0.18964575  | 0.18964575  | -4.766463282 |
| 1429131_at   | 0.151464447  | 6.519766592 | 1.413771464  | 0.189667032 | 0.189667032 | -4.766545274 |
| 1450698_at   | 0.14142566   | 6.313202393 | 1.413736492  | 0.189677003 | 0.189677003 | -4.766583686 |
| 1445635_at   | 0.122435642  | 3.844449765 | 1.41360506   | 0.189714482 | 0.189714482 | -4.766728043 |
| 1448398_s_at | 0.113299506  | 10.41867072 | 1.413595883  | 0.189717099 | 0.189717099 | -4.766738122 |
| 1457713_at   | 0.094189904  | 3.450934063 | 1.413589094  | 0.189719035 | 0.189719035 | -4.766745579 |
| 1427361_at   | -0.127300487 | 5.349623036 | -1.413561234 | 0.18972698  | 0.18972698  | -4.766776177 |
| 1459677_at   | 0.133344315  | 6.366907561 | 1.413132103  | 0.189849401 | 0.189849401 | -4.767247443 |
| 1423015_at   | 0.130619052  | 4.21781285  | 1.413118312  | 0.189853336 | 0.189853336 | -4.767262587 |
| 1422720_at   | 0.221257388  | 6.733174277 | 1.412996612  | 0.189888067 | 0.189888067 | -4.76739622  |
| 1425849_at   | 0.089038004  | 5.454814726 | 1.412814752  | 0.189939976 | 0.189939976 | -4.767595898 |
| 1418130_at   | -0.131852786 | 6.566769115 | -1.412701964 | 0.189972176 | 0.189972176 | -4.76771973  |
| 1439882_at   | 0.383049331  | 8.405976288 | 1.412697147  | 0.189973552 | 0.189973552 | -4.767725019 |
| 1459539_at   | -0.111243839 | 4.699048386 | -1.412628534 | 0.189993142 | 0.189993142 | -4.767800346 |
| 1433909_at   | 0.216212659  | 5.374857917 | 1.412539076  | 0.190018687 | 0.190018687 | -4.767898556 |
| 1441406_at   | 0.104459818  | 6.119897527 | 1.412426893  | 0.190050726 | 0.190050726 | -4.768021709 |
| 1431047_at   | 0.142731591  | 4.972553539 | 1.412404489  | 0.190057125 | 0.190057125 | -4.768046303 |
| 1446589_at   | 0.135684639  | 4.619182938 | 1.412397071  | 0.190059244 | 0.190059244 | -4.768054447 |
| 1439812_at   | 0.097731564  | 4.971675644 | 1.412357692  | 0.190070491 | 0.190070491 | -4.768097674 |
| 1426061_x_at | 0.191264251  | 9.321675634 | 1.41227785   | 0.190093299 | 0.190093299 | -4.768185317 |
| 1422597_at   | 0.175375375  | 7.2245301   | 1.412034722  | 0.190162763 | 0.190162763 | -4.768452182 |
| 1431659_at   | -0.123638886 | 4.955593645 | -1.411979867 | 0.190178439 | 0.190178439 | -4.768512389 |
| 1417391_a_at | -0.109898467 | 5.796601118 | -1.411967601 | 0.190181944 | 0.190181944 | -4.768525852 |
| 1421025_at   | -0.127965281 | 7.132217508 | -1.411949163 | 0.190187214 | 0.190187214 | -4.768546089 |
| 1448795_a_at | -0.154190491 | 8.31592684  | -1.411928682 | 0.190193067 | 0.190193067 | -4.768568567 |
| 1423349_at   | -0.089141553 | 9.672876154 | -1.411832976 | 0.190220421 | 0.190220421 | -4.768673605 |
| 1416769_s_at | -0.092844863 | 9.148012827 | -1.411761859 | 0.19024075  | 0.19024075  | -4.768751653 |
| 1421503_at   | -0.127582704 | 4.720579905 | -1.411699658 | 0.190258531 | 0.190258531 | -4.768819914 |
| 1419641_at   | 0.107053691  | 8.56024724  | 1.411669819  | 0.190267062 | 0.190267062 | -4.76885266  |
| 1432718_at   | -0.176351494 | 4.248301596 | -1.411637219 | 0.190276382 | 0.190276382 | -4.768888435 |
| 1427735_a_at | -0.840951501 | 9.941205822 | -1.411536814 | 0.19030509  | 0.19030509  | -4.768998617 |
| 1450146_at   | -0.182258161 | 4.97540023  | -1.411452662 | 0.190329154 | 0.190329154 | -4.769090959 |
| 1447475_at   | -0.139170376 | 3.944714178 | -1.411440845 | 0.190332533 | 0.190332533 | -4.769103926 |

|                |              |             |              |             |             |              |
|----------------|--------------|-------------|--------------|-------------|-------------|--------------|
| 1441542_at     | 0.108881158  | 4.0708526   | 1.411294015  | 0.190374527 | 0.190374527 | -4.769265037 |
| 1427644_at     | 0.106006433  | 3.444399261 | 1.411056567  | 0.190442454 | 0.190442454 | -4.769525556 |
| 1420877_at     | 0.09315189   | 6.521450874 | 1.41098478   | 0.190462995 | 0.190462995 | -4.769604317 |
| 1427387_a_at   | 0.208991968  | 7.468241767 | 1.410827148  | 0.190508105 | 0.190508105 | -4.769777249 |
| 1417284_at     | 0.111171697  | 9.002938983 | 1.41076032   | 0.190527232 | 0.190527232 | -4.769850559 |
| 1450568_at     | 0.100945022  | 4.52645105  | 1.410607822  | 0.190570885 | 0.190570885 | -4.770017841 |
| 1420111_at     | -0.149350632 | 4.164045354 | -1.410583    | 0.190577992 | 0.190577992 | -4.770045068 |
| 1431785_at     | -0.163013364 | 4.437231627 | -1.410385491 | 0.190634544 | 0.190634544 | -4.770261708 |
| AFFX-BioB-5_at | 0.12745969   | 7.677568786 | 1.410162673  | 0.190698361 | 0.190698361 | -4.770506084 |
| 1456671_at     | 0.434176907  | 4.331981991 | 1.410153817  | 0.190700897 | 0.190700897 | -4.770515797 |
| 1445498_at     | -0.154334628 | 5.244961579 | -1.410117368 | 0.190711338 | 0.190711338 | -4.770555577 |
| 1455019_x_at   | -0.133014538 | 11.40251693 | -1.410100307 | 0.190716226 | 0.190716226 | -4.770574481 |
| 1427281_at     | -0.122087453 | 3.529457603 | -1.410016554 | 0.19074022  | 0.19074022  | -4.770666329 |
| 1460528_at     | -0.149796814 | 4.481815046 | -1.409979102 | 0.19075095  | 0.19075095  | -4.7707074   |
| 1441424_at     | -0.103640224 | 3.789922613 | -1.409885571 | 0.19077775  | 0.19077775  | -4.770809965 |
| 1443872_at     | 0.090851005  | 4.432804045 | 1.409764183  | 0.190812536 | 0.190812536 | -4.770943074 |
| 1438600_at     | 0.102075536  | 4.250215462 | 1.409561079  | 0.190870752 | 0.190870752 | -4.771165772 |
| 1442859_at     | -0.104661021 | 3.50506818  | -1.409560454 | 0.190870932 | 0.190870932 | -4.771166457 |
| 1460356_at     | 0.122554445  | 8.168288795 | 1.409516075  | 0.190883654 | 0.190883654 | -4.771215115 |
| 1449405_at     | -0.141604331 | 6.881415785 | -1.40947432  | 0.190895625 | 0.190895625 | -4.771260895 |
| 1435061_at     | 0.120454859  | 5.974390743 | 1.409448384  | 0.190903061 | 0.190903061 | -4.771289331 |
| 1440404_at     | -0.11375279  | 7.108586234 | -1.40931099  | 0.190942457 | 0.190942457 | -4.771439961 |
| 1432716_at     | 0.088005487  | 3.273923554 | 1.409293943  | 0.190947345 | 0.190947345 | -4.771458649 |
| 1454241_at     | -0.128683113 | 3.648666063 | -1.409279142 | 0.19095159  | 0.19095159  | -4.771474875 |
| 1419880_x_at   | -0.111826186 | 8.201528517 | -1.409262183 | 0.190956453 | 0.190956453 | -4.771493468 |
| 1447649_x_at   | -0.124218591 | 7.290959835 | -1.409256311 | 0.190958137 | 0.190958137 | -4.771499906 |
| 1419235_s_at   | 0.110524141  | 7.27955578  | 1.409131513  | 0.19099393  | 0.19099393  | -4.771636715 |
| 1457553_at     | 0.157277205  | 6.355226403 | 1.409104523  | 0.191001671 | 0.191001671 | -4.771666302 |
| 1428435_at     | -0.162690821 | 4.688718737 | -1.409096085 | 0.191004092 | 0.191004092 | -4.771675552 |
| 1458183_at     | -0.098987207 | 4.073105558 | -1.408736364 | 0.191107298 | 0.191107298 | -4.772069851 |
| 1419768_at     | -0.121813791 | 5.844524921 | -1.408718862 | 0.191112321 | 0.191112321 | -4.772089034 |
| 1450262_at     | 0.1479981    | 6.584312346 | 1.408535734  | 0.191164881 | 0.191164881 | -4.77228974  |
| 1454428_at     | 0.100511298  | 4.418967824 | 1.408450592  | 0.191189322 | 0.191189322 | -4.772383049 |
| 1456829_at     | -0.106630363 | 3.97980341  | -1.408398966 | 0.191204144 | 0.191204144 | -4.772439626 |
| 1437864_at     | 0.163761212  | 7.06206939  | 1.408340437  | 0.191220948 | 0.191220948 | -4.772503766 |
| 1429399_at     | 0.0883683    | 5.898040598 | 1.408252037  | 0.191246331 | 0.191246331 | -4.772600638 |
| 1428931_a_at   | 0.118595708  | 7.481754423 | 1.408214126  | 0.191257217 | 0.191257217 | -4.772642181 |
| 1428232_at     | 0.092890389  | 9.66743736  | 1.408209306  | 0.191258601 | 0.191258601 | -4.772647463 |
| 1429300_at     | -0.188404558 | 5.44587945  | -1.408196662 | 0.191262233 | 0.191262233 | -4.772661319 |
| 1456723_at     | 0.144467122  | 4.302649984 | 1.408076075  | 0.191296864 | 0.191296864 | -4.772793452 |
| 1451033_a_at   | -0.117432842 | 5.725852001 | -1.407951689 | 0.191332593 | 0.191332593 | -4.772929743 |
| 1419164_at     | 0.108747235  | 9.138666234 | 1.407920361  | 0.191341593 | 0.191341593 | -4.772964067 |
| 1455214_at     | 0.13986595   | 6.832493736 | 1.407728425  | 0.191396738 | 0.191396738 | -4.773174356 |
| 1426699_at     | -0.102602109 | 6.45663671  | -1.407650001 | 0.191419274 | 0.191419274 | -4.773260273 |
| 1458529_at     | 0.12622675   | 4.324090915 | 1.407560513  | 0.191444992 | 0.191444992 | -4.773358309 |
| 1431955_at     | -0.12140432  | 3.528314929 | -1.407553599 | 0.191446979 | 0.191446979 | -4.773365882 |
| 1428374_at     | 0.101150627  | 9.63603577  | 1.407538817  | 0.191451228 | 0.191451228 | -4.773382076 |
| 1440779_s_at   | -0.102446747 | 6.075059062 | -1.407467516 | 0.191471722 | 0.191471722 | -4.773460184 |
| 1460243_at     | 0.091133011  | 8.501645393 | 1.407414963  | 0.191486828 | 0.191486828 | -4.773517753 |
| 1428066_at     | 0.136974806  | 5.69564149  | 1.407312032  | 0.191516419 | 0.191516419 | -4.773630503 |
| 1450269_a_at   | -0.120260871 | 9.074691953 | -1.407282739 | 0.191524841 | 0.191524841 | -4.773662589 |
| 1439984_at     | -0.142703644 | 5.481216735 | -1.407265569 | 0.191529778 | 0.191529778 | -4.773681397 |
| 1435458_at     | 0.124763858  | 7.290025169 | 1.407195023  | 0.191550061 | 0.191550061 | -4.773758668 |

|              |              |             |              |             |             |              |
|--------------|--------------|-------------|--------------|-------------|-------------|--------------|
| 1422546_at   | 0.095358162  | 7.934776844 | 1.407075714  | 0.191584371 | 0.191584371 | -4.773889346 |
| 1446021_at   | 0.163798593  | 4.883942813 | 1.40685239   | 0.191648605 | 0.191648605 | -4.774133934 |
| 1458696_at   | -0.107819452 | 3.946571388 | -1.406784905 | 0.19166802  | 0.19166802  | -4.77420784  |
| 1450118_a_at | -0.679071161 | 6.17956336  | -1.406730879 | 0.191683563 | 0.191683563 | -4.774267004 |
| 1460596_at   | -0.125803259 | 6.007127074 | -1.406707043 | 0.191690421 | 0.191690421 | -4.774293107 |
| 1427424_at   | 0.105323307  | 4.626061386 | 1.40664775   | 0.191707482 | 0.191707482 | -4.774358037 |
| 1417778_at   | -0.111256149 | 8.239348162 | -1.406599951 | 0.191721236 | 0.191721236 | -4.77441038  |
| 1431419_at   | 0.10957981   | 6.46064978  | 1.406559371  | 0.191732914 | 0.191732914 | -4.774454816 |
| 1416214_at   | 0.090414858  | 10.50787624 | 1.406431237  | 0.191769791 | 0.191769791 | -4.774595122 |
| 1438966_x_at | -0.097024344 | 5.922562472 | -1.4063669   | 0.19178831  | 0.19178831  | -4.774665567 |
| 1442198_at   | -0.125057487 | 6.874360943 | -1.406326274 | 0.191800004 | 0.191800004 | -4.774710051 |
| 1416313_at   | 0.271833681  | 8.568156289 | 1.406168798  | 0.191845341 | 0.191845341 | -4.774882467 |
| 1422528_a_at | 0.224697191  | 9.228490013 | 1.406022494  | 0.191887469 | 0.191887469 | -4.775042642 |
| 1427172_at   | 0.132495223  | 6.480972589 | 1.406011687  | 0.191890581 | 0.191890581 | -4.775054473 |
| 1418457_at   | 0.344653152  | 6.224344689 | 1.405865657  | 0.191932639 | 0.191932639 | -4.775214337 |
| 1436332_at   | 0.110383816  | 6.883787273 | 1.40578069   | 0.191957114 | 0.191957114 | -4.775307349 |
| 1452169_a_at | 0.137335032  | 10.07562697 | 1.405747313  | 0.191966729 | 0.191966729 | -4.775343884 |
| 1433694_at   | -0.134533978 | 8.6247327   | -1.405674961 | 0.191987573 | 0.191987573 | -4.775423083 |
| 1426167_a_at | 0.118587445  | 4.540191147 | 1.405625155  | 0.192001923 | 0.192001923 | -4.7754776   |
| 1436433_at   | -0.171698426 | 4.260707634 | -1.405597147 | 0.192009993 | 0.192009993 | -4.775508258 |
| 1417155_at   | 0.16372462   | 7.572042372 | 1.405570438  | 0.192017689 | 0.192017689 | -4.775537493 |
| 1426470_at   | -0.135472221 | 4.083824022 | -1.405570405 | 0.192017698 | 0.192017698 | -4.775537528 |
| 1457723_at   | 0.129211094  | 7.604013363 | 1.405347561  | 0.192081919 | 0.192081919 | -4.775781433 |
| 1449136_at   | 0.120310702  | 4.009578662 | 1.405325571  | 0.192088257 | 0.192088257 | -4.7758055   |
| 1433012_at   | 0.136162034  | 3.727930148 | 1.405263299  | 0.192106206 | 0.192106206 | -4.775873652 |
| 1437860_at   | -0.102130235 | 3.01646583  | -1.405245462 | 0.192111348 | 0.192111348 | -4.775893173 |
| 1455051_at   | -0.112304764 | 6.981042781 | -1.405238133 | 0.192113461 | 0.192113461 | -4.775901194 |
| 1447604_at   | 0.12581699   | 4.370370166 | 1.405189004  | 0.192127624 | 0.192127624 | -4.775954961 |
| 1453404_at   | -0.099435644 | 4.791888037 | -1.405046339 | 0.192168756 | 0.192168756 | -4.776111086 |
| 1427500_at   | -0.160508275 | 6.115748086 | -1.405023997 | 0.192175198 | 0.192175198 | -4.776135535 |
| 1430909_at   | 0.095393702  | 6.396541872 | 1.405017443  | 0.192177088 | 0.192177088 | -4.776142707 |
| 1425844_a_at | 0.091490048  | 8.047005468 | 1.404801043  | 0.192239495 | 0.192239495 | -4.776379503 |
| 1457469_at   | -0.136032354 | 4.193639327 | -1.404777744 | 0.192246215 | 0.192246215 | -4.776404996 |
| 1420462_at   | -0.121460401 | 4.094290601 | -1.404726984 | 0.192260857 | 0.192260857 | -4.776460537 |
| 1428859_at   | 0.106998094  | 7.624911333 | 1.404704572  | 0.192267322 | 0.192267322 | -4.776485059 |
| 1427297_at   | 0.125080847  | 9.156214921 | 1.404636334  | 0.192287007 | 0.192287007 | -4.776559721 |
| 1423618_at   | -0.091341626 | 5.662196378 | -1.404610913 | 0.192294341 | 0.192294341 | -4.776587534 |
| 1425670_at   | -0.11673305  | 5.158361418 | -1.404539268 | 0.192315011 | 0.192315011 | -4.776665921 |
| 1428770_at   | -0.129167914 | 5.901421856 | -1.404383998 | 0.192359815 | 0.192359815 | -4.776835793 |
| 1423697_at   | 0.084234901  | 11.2833942  | 1.404366078  | 0.192364987 | 0.192364987 | -4.776855397 |
| 1419224_at   | -0.146753109 | 5.738232851 | -1.404149547 | 0.192427484 | 0.192427484 | -4.77709227  |
| 1422361_at   | 0.161317226  | 4.245382437 | 1.403990587  | 0.192473376 | 0.192473376 | -4.777266149 |
| 1424531_a_at | -0.17592324  | 5.488077875 | -1.4039771   | 0.19247727  | 0.19247727  | -4.777280901 |
| 1457977_at   | -0.130124255 | 4.370527345 | -1.403969463 | 0.192479475 | 0.192479475 | -4.777289255 |
| 1460161_at   | -0.088169929 | 5.129365064 | -1.403947828 | 0.192485722 | 0.192485722 | -4.77731292  |
| 1450918_s_at | -0.151759499 | 7.826237616 | -1.403866454 | 0.19250922  | 0.19250922  | -4.777401925 |
| 1425618_at   | -0.107317672 | 3.841095803 | -1.403860136 | 0.192511044 | 0.192511044 | -4.777408835 |
| 1455186_a_at | 0.172942209  | 7.15388114  | 1.403837931  | 0.192517457 | 0.192517457 | -4.777433122 |
| 1451353_at   | -0.161550195 | 7.660782955 | -1.403789943 | 0.192531315 | 0.192531315 | -4.777485608 |
| 1422231_a_at | -0.113389639 | 5.998303449 | -1.403779944 | 0.192534203 | 0.192534203 | -4.777496545 |
| 1437399_at   | -0.174148826 | 5.141281377 | -1.403596587 | 0.192587165 | 0.192587165 | -4.777697078 |
| 1450985_a_at | 0.12784782   | 8.564325459 | 1.403376286  | 0.192650813 | 0.192650813 | -4.777937995 |
| 1455140_at   | -0.129265059 | 5.85647197  | -1.403332251 | 0.192663538 | 0.192663538 | -4.777986149 |

|              |              |             |              |             |             |              |
|--------------|--------------|-------------|--------------|-------------|-------------|--------------|
| 1457196_at   | 0.116360172  | 5.200926819 | 1.403315079  | 0.1926685   | 0.1926685   | -4.778004926 |
| 1428257_s_at | 0.091905311  | 10.36051683 | 1.403070344  | 0.192739235 | 0.192739235 | -4.778272531 |
| 1452677_at   | -0.287219773 | 4.723324098 | -1.403023657 | 0.192752731 | 0.192752731 | -4.778323578 |
| 1445614_at   | -0.113316983 | 5.856620877 | -1.403003409 | 0.192758585 | 0.192758585 | -4.778345716 |
| 1432754_at   | 0.157979339  | 4.490910065 | 1.402956021  | 0.192772285 | 0.192772285 | -4.778397527 |
| 1441727_s_at | 0.198958597  | 8.122283404 | 1.402946068  | 0.192775162 | 0.192775162 | -4.77840841  |
| 1459751_s_at | 0.125798167  | 8.18395521  | 1.402930114  | 0.192779775 | 0.192779775 | -4.778425852 |
| 1435881_at   | 0.090175723  | 8.919063913 | 1.402893371  | 0.192790399 | 0.192790399 | -4.778466024 |
| 1424341_s_at | 0.227061107  | 6.054057862 | 1.402786685  | 0.192821247 | 0.192821247 | -4.778582662 |
| 1428497_at   | 0.17898363   | 7.872542784 | 1.402777016  | 0.192824044 | 0.192824044 | -4.778593233 |
| 1459747_at   | -0.236353734 | 6.923534486 | -1.402695231 | 0.192847695 | 0.192847695 | -4.778682642 |
| 1420454_at   | 0.137433002  | 6.27189584  | 1.402496515  | 0.192905174 | 0.192905174 | -4.778899872 |
| 1444785_at   | 0.145868096  | 8.487264714 | 1.402402448  | 0.192932387 | 0.192932387 | -4.779002695 |
| 1452178_at   | -0.163483646 | 4.699497293 | -1.402205349 | 0.192989419 | 0.192989419 | -4.779218131 |
| 1452383_at   | 0.150814703  | 5.004366208 | 1.402197191  | 0.19299178  | 0.19299178  | -4.779227047 |
| 1454143_at   | -0.1588772   | 3.792604405 | -1.402194879 | 0.192992449 | 0.192992449 | -4.779229574 |
| 1427055_at   | 0.13877118   | 5.995550826 | 1.402170203  | 0.19299959  | 0.19299959  | -4.779256544 |
| 1424740_at   | -0.137642452 | 7.999301551 | -1.402153343 | 0.193004469 | 0.193004469 | -4.779274972 |
| 1440374_at   | -0.126872028 | 5.283062271 | -1.402075682 | 0.193026947 | 0.193026947 | -4.77935985  |
| 1438381_x_at | 0.120395982  | 4.037011928 | 1.402011382  | 0.193045558 | 0.193045558 | -4.779430124 |
| 1432463_at   | 0.101574263  | 3.254263231 | 1.401827102  | 0.193098907 | 0.193098907 | -4.779631514 |
| 1438143_s_at | 0.15062207   | 9.014121754 | 1.401662425  | 0.193146592 | 0.193146592 | -4.779811468 |
| 1446388_at   | 0.090054119  | 3.266151471 | 1.401491792  | 0.193196011 | 0.193196011 | -4.779997916 |
| 1444420_at   | -0.106493671 | 3.820199034 | -1.401405165 | 0.193221105 | 0.193221105 | -4.780092566 |
| 1439028_at   | -0.173886133 | 6.746276889 | -1.401361373 | 0.193233791 | 0.193233791 | -4.780140414 |
| 1431141_at   | -0.270829438 | 5.560748785 | -1.401323683 | 0.19324471  | 0.19324471  | -4.780181592 |
| 1447279_at   | 0.148460691  | 5.066368056 | 1.401304977  | 0.19325013  | 0.19325013  | -4.78020203  |
| 1443143_at   | -0.12029985  | 4.736838289 | -1.401159347 | 0.193292327 | 0.193292327 | -4.780361135 |
| 1436929_x_at | -0.102977503 | 4.60196205  | -1.401124625 | 0.193302389 | 0.193302389 | -4.780399067 |
| 1438339_at   | -0.107120226 | 5.671338884 | -1.401115282 | 0.193305097 | 0.193305097 | -4.780409275 |
| 1459935_at   | -0.121543883 | 3.407795942 | -1.4009699   | 0.193347232 | 0.193347232 | -4.780568094 |
| 1439866_at   | -0.166574057 | 6.16129829  | -1.400963465 | 0.193349097 | 0.193349097 | -4.780575124 |
| 1456488_at   | 0.142080504  | 6.463243421 | 1.40088778   | 0.193371036 | 0.193371036 | -4.780657801 |
| 1447621_s_at | 0.145669577  | 4.987607711 | 1.400879714  | 0.193373374 | 0.193373374 | -4.780666612 |
| 1443077_at   | 0.204949284  | 5.452202114 | 1.400872949  | 0.193375335 | 0.193375335 | -4.780674002 |
| 1450335_at   | -0.134670273 | 5.11595452  | -1.400849001 | 0.193382277 | 0.193382277 | -4.780700161 |
| 1438499_at   | 0.098297132  | 4.626202124 | 1.40079697   | 0.193397361 | 0.193397361 | -4.780756996 |
| 1438611_at   | 0.102024462  | 4.767627774 | 1.400753857  | 0.193409861 | 0.193409861 | -4.780804089 |
| 1435536_at   | -0.112545738 | 9.620131007 | -1.400749526 | 0.193411116 | 0.193411116 | -4.78080882  |
| 1451238_at   | -0.088191515 | 9.673354812 | -1.400626374 | 0.193446825 | 0.193446825 | -4.780943335 |
| 1447627_at   | -0.103634174 | 4.136793611 | -1.400622124 | 0.193448057 | 0.193448057 | -4.780947977 |
| 1420919_at   | -0.159780269 | 8.511530752 | -1.400597495 | 0.1934552   | 0.1934552   | -4.780974878 |
| 1458934_at   | -0.306871774 | 5.881211233 | -1.400568868 | 0.193463501 | 0.193463501 | -4.781006144 |
| 1435330_at   | 0.151262753  | 4.059538007 | 1.400536444  | 0.193472904 | 0.193472904 | -4.781041559 |
| 1452761_a_at | 0.128097306  | 10.6078598  | 1.400532823  | 0.193473955 | 0.193473955 | -4.781045513 |
| 1420586_at   | -0.112070025 | 4.485321437 | -1.400525566 | 0.193476059 | 0.193476059 | -4.78105344  |
| 1454483_at   | -0.106708941 | 3.984889615 | -1.400474555 | 0.193490854 | 0.193490854 | -4.781109152 |
| 1453391_at   | -0.24238564  | 5.520686985 | -1.400334434 | 0.193531497 | 0.193531497 | -4.781262183 |
| 1449378_at   | -0.140354214 | 4.200410432 | -1.400222788 | 0.193563887 | 0.193563887 | -4.781384109 |
| 1428740_a_at | 0.116801517  | 7.750742952 | 1.400123325  | 0.193592746 | 0.193592746 | -4.781492725 |
| 1432586_at   | -0.135678757 | 3.320619143 | -1.400100182 | 0.193599461 | 0.193599461 | -4.781517997 |
| 1441061_at   | -0.103653225 | 6.286213263 | -1.400084683 | 0.193603959 | 0.193603959 | -4.781534922 |
| 1442481_at   | -0.10680266  | 5.780889329 | -1.400060514 | 0.193610972 | 0.193610972 | -4.781561314 |

|              |              |             |              |             |             |              |
|--------------|--------------|-------------|--------------|-------------|-------------|--------------|
| 1429224_at   | -0.148730628 | 4.108199028 | -1.399849543 | 0.193672202 | 0.193672202 | -4.781791679 |
| 1456635_at   | -0.098507326 | 5.904440391 | -1.399816985 | 0.193681653 | 0.193681653 | -4.781827227 |
| 1432734_at   | -0.155520237 | 4.47941205  | -1.399805344 | 0.193685032 | 0.193685032 | -4.781839937 |
| 1421266_s_at | 0.135964326  | 7.570298982 | 1.399801037  | 0.193686282 | 0.193686282 | -4.78184464  |
| 1437887_at   | 0.140378755  | 6.19297128  | 1.39978052   | 0.193692238 | 0.193692238 | -4.781867041 |
| 1416273_at   | 0.142361925  | 7.54002763  | 1.399662355  | 0.193726543 | 0.193726543 | -4.781996055 |
| 1426113_x_at | 0.094503371  | 6.294276085 | 1.39964134   | 0.193732645 | 0.193732645 | -4.782018999 |
| 1430406_at   | 0.119816109  | 5.520141376 | 1.39946771   | 0.193783063 | 0.193783063 | -4.782208557 |
| 1458460_at   | -0.103195832 | 6.001844074 | -1.399282562 | 0.193836838 | 0.193836838 | -4.782410674 |
| 1441543_at   | 0.153611047  | 4.691366652 | 1.399069702  | 0.193898678 | 0.193898678 | -4.782643023 |
| 1442531_at   | 0.362803196  | 6.806341288 | 1.398964319  | 0.1939293   | 0.1939293   | -4.782758046 |
| 1449614_s_at | 0.126674764  | 7.255294101 | 1.398960465  | 0.19393042  | 0.19393042  | -4.782762253 |
| 1442520_at   | 0.094098431  | 3.670671919 | 1.398929085  | 0.193939539 | 0.193939539 | -4.782796502 |
| 1440835_at   | 0.145897755  | 6.892194133 | 1.39888848   | 0.19395134  | 0.19395134  | -4.78284082  |
| 1450514_at   | -0.111438181 | 4.247703461 | -1.398886905 | 0.193951797 | 0.193951797 | -4.782842538 |
| 1445426_at   | 0.091095342  | 6.066251092 | 1.398885583  | 0.193952181 | 0.193952181 | -4.782843982 |
| 1421208_at   | 0.09352214   | 6.956833434 | 1.39885691   | 0.193960515 | 0.193960515 | -4.782875275 |
| 1422860_at   | -0.330166955 | 5.031367572 | -1.398732801 | 0.193996588 | 0.193996588 | -4.783010724 |
| 1431806_at   | -0.217785449 | 4.774332597 | -1.398730197 | 0.193997345 | 0.193997345 | -4.783013567 |
| 1441047_at   | -0.13294488  | 5.729679517 | -1.398684892 | 0.194010515 | 0.194010515 | -4.78306301  |
| 1436106_x_at | -0.092311603 | 6.993377137 | -1.398665569 | 0.194016132 | 0.194016132 | -4.783084097 |
| 1423435_at   | -0.157543223 | 4.917398806 | -1.398513466 | 0.194060354 | 0.194060354 | -4.783250084 |
| 1427036_a_at | -0.113311174 | 11.45713389 | -1.39849184  | 0.194066642 | 0.194066642 | -4.783273683 |
| 1436329_at   | 0.727459874  | 5.094168705 | 1.3984522    | 0.194078169 | 0.194078169 | -4.78331694  |
| 1439473_at   | 0.148786974  | 4.64137321  | 1.398435872  | 0.194082917 | 0.194082917 | -4.783334756 |
| 1457570_at   | -0.153390973 | 5.228903908 | -1.398373762 | 0.194100979 | 0.194100979 | -4.78340253  |
| 1436213_a_at | 0.175787921  | 4.553024588 | 1.398368475  | 0.194102516 | 0.194102516 | -4.7834083   |
| 1423163_at   | -0.096974304 | 7.316102548 | -1.398041163 | 0.194197725 | 0.194197725 | -4.783765429 |
| 1457617_at   | -0.155776947 | 5.591055024 | -1.398005331 | 0.19420815  | 0.19420815  | -4.783804522 |
| 1455339_at   | 0.115084876  | 7.722868396 | 1.397776249  | 0.194274812 | 0.194274812 | -4.784054438 |
| 1445502_at   | -0.103892574 | 4.329141839 | -1.397767163 | 0.194277457 | 0.194277457 | -4.784064351 |
| 1443806_x_at | 0.116107051  | 3.263002119 | 1.397763626  | 0.194278486 | 0.194278486 | -4.78406821  |
| 1418650_at   | -0.105940013 | 7.163059997 | -1.397698365 | 0.194297481 | 0.194297481 | -4.784139401 |
| 1452735_at   | 0.108986455  | 10.10424706 | 1.397681662  | 0.194302343 | 0.194302343 | -4.784157621 |
| 1418779_at   | -0.126505036 | 8.606383083 | -1.397594511 | 0.194327712 | 0.194327712 | -4.784252688 |
| 1433860_at   | 0.108354816  | 8.86588595  | 1.397515811  | 0.194350623 | 0.194350623 | -4.784338534 |
| 1418503_at   | 0.107670024  | 9.870160893 | 1.397353231  | 0.194397961 | 0.194397961 | -4.784515865 |
| 1450821_at   | -0.136428171 | 5.597416488 | -1.397343999 | 0.194400649 | 0.194400649 | -4.784525934 |
| 1448596_at   | -0.127622291 | 7.859078613 | -1.397231886 | 0.194433299 | 0.194433299 | -4.784648212 |
| 1459106_at   | -0.13503442  | 3.689749102 | -1.396835877 | 0.194548663 | 0.194548663 | -4.785080077 |
| 1439168_at   | 0.134031722  | 6.130680609 | 1.396809018  | 0.19455649  | 0.19455649  | -4.785109365 |
| 1421804_at   | -0.172852496 | 3.28287257  | -1.396551519 | 0.194631537 | 0.194631537 | -4.785390137 |
| 1444730_at   | -0.12894953  | 3.725916322 | -1.396466195 | 0.19465641  | 0.19465641  | -4.785483165 |
| 1440000_at   | 0.127092389  | 4.201223299 | 1.396083472  | 0.194768012 | 0.194768012 | -4.785900405 |
| 1444446_at   | -0.085335578 | 7.361342458 | -1.395955831 | 0.194805244 | 0.194805244 | -4.786039541 |
| 1417311_at   | -0.137604682 | 9.18022038  | -1.395953708 | 0.194805864 | 0.194805864 | -4.786041855 |
| 1418095_at   | -0.726025171 | 5.752958975 | -1.395942181 | 0.194809226 | 0.194809226 | -4.78605442  |
| 1439001_at   | -0.107838693 | 5.240201039 | -1.395880119 | 0.194827332 | 0.194827332 | -4.786122068 |
| 1441209_at   | -0.115964299 | 4.077412976 | -1.395859317 | 0.194833401 | 0.194833401 | -4.786144743 |
| 1449163_at   | -0.094417938 | 6.420377119 | -1.395808663 | 0.19484818  | 0.19484818  | -4.786199954 |
| 1432168_at   | 0.094117305  | 5.503751423 | 1.395786917  | 0.194854525 | 0.194854525 | -4.786223656 |
| 1425650_at   | -0.13807879  | 5.855387805 | -1.395751739 | 0.19486479  | 0.19486479  | -4.786261999 |
| 1450576_a_at | -0.204568399 | 7.117152371 | -1.395703552 | 0.194878851 | 0.194878851 | -4.786314519 |

|              |              |             |              |             |             |              |
|--------------|--------------|-------------|--------------|-------------|-------------|--------------|
| 1428594_at   | 0.1048006    | 8.711939845 | 1.395561457  | 0.19492032  | 0.19492032  | -4.786469386 |
| 1419845_at   | 1.312888641  | 6.053970403 | 1.395503761  | 0.19493716  | 0.19493716  | -4.786532265 |
| 1443923_at   | 0.360088621  | 7.713258087 | 1.395245428  | 0.195012576 | 0.195012576 | -4.786813785 |
| 1445223_at   | -0.134370064 | 3.693528928 | -1.395190064 | 0.195028742 | 0.195028742 | -4.786874115 |
| 1447895_x_at | 0.200639569  | 6.528358221 | 1.395145626  | 0.195041719 | 0.195041719 | -4.786922538 |
| 1453999_at   | 0.158894267  | 6.105314133 | 1.395142008  | 0.195042775 | 0.195042775 | -4.786926448 |
| 1455989_at   | -0.090750646 | 3.955877277 | -1.395132054 | 0.195045682 | 0.195045682 | -4.786937327 |
| 1428864_at   | 0.123912112  | 6.990645483 | 1.395078055  | 0.195061452 | 0.195061452 | -4.786996165 |
| 1456348_x_at | -0.118705766 | 4.018399568 | -1.395049358 | 0.195069833 | 0.195069833 | -4.787027434 |
| 1428463_a_at | 0.172850413  | 8.943281297 | 1.395042303  | 0.195071893 | 0.195071893 | -4.787035121 |
| 1429560_at   | 0.160444353  | 8.599981177 | 1.394953455  | 0.195097844 | 0.195097844 | -4.787131928 |
| 1458039_at   | 0.114364583  | 5.805081061 | 1.39478583   | 0.195146811 | 0.195146811 | -4.787314559 |
| 1451605_at   | -0.172064545 | 5.291927133 | -1.394634401 | 0.195191056 | 0.195191056 | -4.787479533 |
| 1433421_at   | -0.096860501 | 6.007196362 | -1.394625437 | 0.195193676 | 0.195193676 | -4.787489299 |
| 1449713_at   | 0.144314503  | 4.1131065   | 1.394579942  | 0.19520697  | 0.19520697  | -4.78753886  |
| 1457951_at   | -0.123918001 | 5.214800352 | -1.394579805 | 0.19520701  | 0.19520701  | -4.787539009 |
| 1449173_at   | -0.145353937 | 6.223613251 | -1.394558289 | 0.195213298 | 0.195213298 | -4.787562449 |
| 1450653_at   | -0.14302078  | 3.897965048 | -1.394538202 | 0.195219168 | 0.195219168 | -4.78758433  |
| 1417243_at   | 0.086288921  | 9.562644586 | 1.394293703  | 0.195290634 | 0.195290634 | -4.787850665 |
| 1419822_at   | -0.105122933 | 4.241542713 | -1.394280989 | 0.195294351 | 0.195294351 | -4.787864513 |
| 1455644_at   | 0.165981903  | 7.396482609 | 1.394257912  | 0.195301097 | 0.195301097 | -4.78788965  |
| 1429321_at   | 0.099104077  | 10.15742596 | 1.394203865  | 0.195316899 | 0.195316899 | -4.787948519 |
| 1419108_at   | 0.089631417  | 7.050485407 | 1.39419768   | 0.195318707 | 0.195318707 | -4.787955256 |
| 1425420_s_at | -0.139498468 | 4.365641999 | -1.39407115  | 0.195355704 | 0.195355704 | -4.788093069 |
| 1416050_a_at | -0.109434705 | 8.532451793 | -1.394049903 | 0.195361917 | 0.195361917 | -4.788116209 |
| 1428875_at   | -0.094206756 | 10.36561811 | -1.393916644 | 0.19540089  | 0.19540089  | -4.788261342 |
| 1438401_at   | 0.128780754  | 9.178414193 | 1.393785105  | 0.195439365 | 0.195439365 | -4.788404592 |
| 1433397_at   | 0.118399145  | 3.621236    | 1.393776351  | 0.195441926 | 0.195441926 | -4.788414126 |
| 1434852_at   | -0.09087311  | 4.794683765 | -1.393745293 | 0.195451012 | 0.195451012 | -4.788447948 |
| 1440445_at   | -0.106293358 | 3.513105466 | -1.39358883  | 0.195496789 | 0.195496789 | -4.788618328 |
| 1443496_at   | -0.107238413 | 3.695698928 | -1.393569359 | 0.195502486 | 0.195502486 | -4.78863953  |
| 1446633_at   | -0.096482819 | 3.611040335 | -1.393501229 | 0.195522423 | 0.195522423 | -4.788713716 |
| 1442149_at   | 0.113548939  | 6.154055653 | 1.393376898  | 0.195558809 | 0.195558809 | -4.788849093 |
| 1452700_s_at | 0.128839829  | 9.235004125 | 1.393351755  | 0.195566168 | 0.195566168 | -4.788876469 |
| 1450835_a_at | -0.123147573 | 6.487582148 | -1.393303951 | 0.195580161 | 0.195580161 | -4.788928518 |
| 1454560_at   | 0.160816268  | 4.13192165  | 1.39318865   | 0.195613913 | 0.195613913 | -4.789054052 |
| 1431036_a_at | -0.087465303 | 10.20453192 | -1.393062176 | 0.195650941 | 0.195650941 | -4.789191744 |
| 1457067_at   | 0.141285392  | 4.896991107 | 1.392986298  | 0.195673159 | 0.195673159 | -4.789274348 |
| 1441044_at   | 0.149865207  | 3.703524156 | 1.392627422  | 0.195778272 | 0.195778272 | -4.789664999 |
| 1419869_s_at | -0.118661609 | 10.90691613 | -1.392625682 | 0.195778782 | 0.195778782 | -4.789666893 |
| 1443678_at   | -0.131709893 | 6.776023196 | -1.392592061 | 0.195788632 | 0.195788632 | -4.789703487 |
| 1426326_at   | 0.195911972  | 8.126284687 | 1.392467556  | 0.195825112 | 0.195825112 | -4.789839001 |
| 1449466_at   | -0.111632737 | 5.168821691 | -1.392413957 | 0.195840818 | 0.195840818 | -4.789897336 |
| 1454498_at   | -0.117226155 | 4.721346185 | -1.392368129 | 0.195854248 | 0.195854248 | -4.789947213 |
| 1424995_at   | 0.155960718  | 4.528229853 | 1.392322241  | 0.195867696 | 0.195867696 | -4.789997153 |
| 1427139_at   | -0.155374926 | 9.410692902 | -1.392220974 | 0.195897377 | 0.195897377 | -4.790107361 |
| 1453476_at   | -0.123350325 | 3.368526987 | -1.392040589 | 0.195950257 | 0.195950257 | -4.79030366  |
| 1434915_s_at | -0.105665689 | 3.036374872 | -1.392023143 | 0.195955372 | 0.195955372 | -4.790322644 |
| 1448656_at   | 0.165894508  | 7.857849333 | 1.39197284   | 0.195970121 | 0.195970121 | -4.790377382 |
| 1419194_s_at | -0.202536924 | 6.280026634 | -1.391796905 | 0.196021712 | 0.196021712 | -4.790568817 |
| 1453511_at   | -0.191987411 | 4.420548456 | -1.391772706 | 0.196028809 | 0.196028809 | -4.790595147 |
| 1425579_at   | -0.121983422 | 7.294950932 | -1.391728123 | 0.196041885 | 0.196041885 | -4.790643656 |
| 1435615_at   | -0.127298731 | 4.438617773 | -1.391691988 | 0.196052483 | 0.196052483 | -4.790682971 |

|              |              |             |              |             |             |              |
|--------------|--------------|-------------|--------------|-------------|-------------|--------------|
| 1440417_at   | 0.117165257  | 8.820457208 | 1.391672452  | 0.196058213 | 0.196058213 | -4.790704226 |
| 1431663_a_at | 0.121487201  | 4.726075833 | 1.391621726  | 0.196073093 | 0.196073093 | -4.790759416 |
| 1421442_at   | -0.14057706  | 5.640156887 | -1.39144041  | 0.196126286 | 0.196126286 | -4.790956676 |
| 1454663_at   | 0.099973358  | 9.928384792 | 1.391197011  | 0.196197712 | 0.196197712 | -4.791221454 |
| 1445242_at   | -0.100501879 | 4.620448572 | -1.391125841 | 0.196218601 | 0.196218601 | -4.79129887  |
| 1427236_a_at | 0.092991756  | 9.947568129 | 1.391018965  | 0.196249974 | 0.196249974 | -4.791415121 |
| 1434638_at   | 0.178658422  | 6.57954068  | 1.390962378  | 0.196266587 | 0.196266587 | -4.791476669 |
| 1436944_x_at | -0.305661852 | 9.751854209 | -1.3908201   | 0.196308361 | 0.196308361 | -4.791631415 |
| 1450550_at   | 0.113782416  | 4.225992932 | 1.390701618  | 0.196343155 | 0.196343155 | -4.791760273 |
| 1434838_at   | -0.116921033 | 5.19439386  | -1.390687561 | 0.196347283 | 0.196347283 | -4.79177556  |
| 1425381_a_at | -0.09518914  | 6.28980544  | -1.39063395  | 0.196363029 | 0.196363029 | -4.791833864 |
| 1416827_at   | 0.087118488  | 5.574675333 | 1.390537536  | 0.196391348 | 0.196391348 | -4.791938713 |
| 1427824_at   | -0.121230153 | 5.776004486 | -1.390516215 | 0.196397611 | 0.196397611 | -4.791961899 |
| 1427895_at   | 0.106919301  | 7.616407139 | 1.3903742    | 0.196439333 | 0.196439333 | -4.792116329 |
| 1416761_at   | 0.129533611  | 4.519974003 | 1.390262163  | 0.196472252 | 0.196472252 | -4.792238153 |
| 1416142_at   | -0.166280553 | 8.920192464 | -1.390227044 | 0.196482572 | 0.196482572 | -4.792276339 |
| 1452057_at   | -0.109537247 | 7.989484367 | -1.39016571  | 0.196500596 | 0.196500596 | -4.792343028 |
| 1444601_at   | 0.101127875  | 5.986346657 | 1.390160897  | 0.196502011 | 0.196502011 | -4.79234826  |
| 1439272_at   | -0.145126535 | 7.137036225 | -1.390108804 | 0.196517321 | 0.196517321 | -4.7924049   |
| 1446043_at   | 0.091999605  | 5.064859613 | 1.390103594  | 0.196518852 | 0.196518852 | -4.792410564 |
| 1440208_at   | 0.112831506  | 4.09583016  | 1.390101804  | 0.196519378 | 0.196519378 | -4.792412511 |
| 1427872_at   | 0.144973574  | 3.474338374 | 1.390016907  | 0.196544331 | 0.196544331 | -4.792504813 |
| 1444691_at   | 0.154238741  | 3.825675559 | 1.389669289  | 0.196646533 | 0.196646533 | -4.792882721 |
| 1432110_at   | -0.093395433 | 3.53936825  | -1.389664391 | 0.196647973 | 0.196647973 | -4.792888045 |
| 1455428_at   | -0.099094075 | 6.986189546 | -1.389445538 | 0.196712341 | 0.196712341 | -4.793125937 |
| 1427233_at   | 0.191089058  | 9.558343649 | 1.389378525  | 0.196732054 | 0.196732054 | -4.793198776 |
| 1459352_at   | 0.106035196  | 3.480957333 | 1.389346774  | 0.196741395 | 0.196741395 | -4.793233286 |
| 1422708_at   | -0.107490715 | 4.229659283 | -1.389321352 | 0.196748874 | 0.196748874 | -4.793260917 |
| 1441876_x_at | 0.085607093  | 4.981668776 | 1.389204863  | 0.196783147 | 0.196783147 | -4.793387523 |
| 1423535_at   | 0.102734609  | 10.68958778 | 1.388972631  | 0.196851491 | 0.196851491 | -4.793639907 |
| 1422461_at   | -0.091167111 | 8.165931742 | -1.388923294 | 0.196866013 | 0.196866013 | -4.793693522 |
| 1427303_at   | -0.116244725 | 3.515296301 | -1.388883008 | 0.196877871 | 0.196877871 | -4.7937373   |
| 1431268_at   | -0.122847485 | 3.38072929  | -1.388811339 | 0.196898969 | 0.196898969 | -4.79381518  |
| 1437979_at   | 0.08539836   | 3.270056253 | 1.388713584  | 0.196927749 | 0.196927749 | -4.793921403 |
| 1436517_at   | -0.143816381 | 9.044312563 | -1.388648575 | 0.19694689  | 0.19694689  | -4.79399204  |
| 1434541_x_at | 0.107099595  | 11.09436287 | 1.388645779  | 0.196947714 | 0.196947714 | -4.793995077 |
| 1427370_at   | -0.102415597 | 3.587510745 | -1.388563635 | 0.196971903 | 0.196971903 | -4.794084332 |
| 1422721_at   | 0.245483447  | 7.262668189 | 1.388483394  | 0.196995534 | 0.196995534 | -4.794171513 |
| 1454325_at   | -0.126376623 | 4.238780386 | -1.388393243 | 0.197022086 | 0.197022086 | -4.794269459 |
| 1444850_at   | 0.146548576  | 3.822287005 | 1.388335215  | 0.197039179 | 0.197039179 | -4.794332502 |
| 1443230_at   | -0.171899685 | 5.109387272 | -1.388295622 | 0.197050842 | 0.197050842 | -4.794375517 |
| 1451060_at   | -0.132967437 | 3.864674817 | -1.388281774 | 0.197054922 | 0.197054922 | -4.794390561 |
| 1418319_at   | -0.122877401 | 9.494459006 | -1.388258133 | 0.197061886 | 0.197061886 | -4.794416244 |
| 1438702_at   | 0.117225207  | 9.946502624 | 1.388218127  | 0.197073672 | 0.197073672 | -4.794459705 |
| 1439683_at   | -0.115792652 | 4.125632416 | -1.388183788 | 0.197083789 | 0.197083789 | -4.79449701  |
| 1432693_at   | 0.135292137  | 5.241022742 | 1.388183768  | 0.197083795 | 0.197083795 | -4.79449703  |
| 1443375_at   | 0.393419893  | 6.02712468  | 1.388166025  | 0.197089023 | 0.197089023 | -4.794516306 |
| 1421122_at   | 0.135870601  | 8.264959374 | 1.388066319  | 0.197118402 | 0.197118402 | -4.794624618 |
| 1433221_at   | -0.125284148 | 6.144260786 | -1.388045306 | 0.197124594 | 0.197124594 | -4.794647443 |
| 1427138_at   | 0.12076635   | 6.271867965 | 1.38791922   | 0.197161752 | 0.197161752 | -4.794784404 |
| 1446835_at   | -0.126954838 | 7.271847353 | -1.387770905 | 0.197205468 | 0.197205468 | -4.794945501 |
| 1459529_at   | -0.095039523 | 3.161808809 | -1.387767077 | 0.197206597 | 0.197206597 | -4.794949658 |
| 1440318_at   | 0.155181809  | 7.475651704 | 1.387618494  | 0.197250401 | 0.197250401 | -4.795111035 |

|              |              |             |              |             |             |              |
|--------------|--------------|-------------|--------------|-------------|-------------|--------------|
| 1447754_x_at | 0.136127656  | 6.981413156 | 1.387553127  | 0.197269675 | 0.197269675 | -4.795182028 |
| 1435513_at   | -0.093385937 | 3.605106901 | -1.387549133 | 0.197270852 | 0.197270852 | -4.795186366 |
| 1425501_at   | 0.141805152  | 3.8578338   | 1.387406223  | 0.197312996 | 0.197312996 | -4.795341567 |
| 1415788_at   | 0.087104967  | 9.892334584 | 1.387386564  | 0.197318793 | 0.197318793 | -4.795362915 |
| 1446101_at   | 0.125307442  | 6.108289291 | 1.38730257   | 0.197343567 | 0.197343567 | -4.795454128 |
| 1422272_at   | -0.117829041 | 8.169755083 | -1.387117599 | 0.197398132 | 0.197398132 | -4.795654984 |
| 1431752_a_at | -0.096165365 | 7.277738129 | -1.386991554 | 0.197435322 | 0.197435322 | -4.795791844 |
| 1458684_at   | 0.153778713  | 7.790678798 | 1.386765396  | 0.197502066 | 0.197502066 | -4.796037388 |
| 1439210_at   | 0.097665705  | 7.469622229 | 1.386609796  | 0.197547997 | 0.197547997 | -4.796206312 |
| 1445847_at   | 0.142969948  | 6.121211859 | 1.38660634   | 0.197549018 | 0.197549018 | -4.796210064 |
| 1456353_at   | 0.109527994  | 6.07879378  | 1.386451568  | 0.197594714 | 0.197594714 | -4.796378077 |
| 1444937_at   | 0.145538187  | 4.044900554 | 1.38632231   | 0.197632884 | 0.197632884 | -4.796518385 |
| 1443404_s_at | 0.089075523  | 3.113010706 | 1.386302632  | 0.197638696 | 0.197638696 | -4.796539744 |
| 1455444_at   | 0.16331112   | 3.511502381 | 1.386277524  | 0.197646111 | 0.197646111 | -4.796566998 |
| 1424468_s_at | -0.115635721 | 8.423749304 | -1.386139986 | 0.197686736 | 0.197686736 | -4.796716281 |
| 1448881_at   | -0.266170298 | 5.570621562 | -1.385986978 | 0.197731938 | 0.197731938 | -4.796882345 |
| 1434728_at   | -0.117777374 | 8.170741799 | -1.38590904  | 0.197754967 | 0.197754967 | -4.796966929 |
| 1452843_at   | 0.10948877   | 9.043255786 | 1.385813349  | 0.197783244 | 0.197783244 | -4.797070776 |
| 1439172_at   | -0.114886907 | 3.663820864 | -1.385710795 | 0.197813552 | 0.197813552 | -4.797182066 |
| 1438476_a_at | 0.215607745  | 7.260479297 | 1.385456269  | 0.197888791 | 0.197888791 | -4.797458252 |
| 1434880_at   | 0.158217918  | 8.106135565 | 1.385370059  | 0.197914281 | 0.197914281 | -4.797551791 |
| 1436146_at   | -0.11177196  | 3.477383987 | -1.38527395  | 0.197942701 | 0.197942701 | -4.797656068 |
| 1432928_at   | -0.105165968 | 3.585755631 | -1.385045483 | 0.198010274 | 0.198010274 | -4.797903931 |
| 1422515_at   | 0.100312459  | 3.346481806 | 1.384990496  | 0.19802654  | 0.19802654  | -4.797963582 |
| 1457016_at   | 0.093152856  | 4.064858406 | 1.384986378  | 0.198027758 | 0.198027758 | -4.79796805  |
| 1449271_a_at | -0.132752909 | 8.697644464 | -1.384978559 | 0.198030071 | 0.198030071 | -4.797976531 |
| 1449980_a_at | 0.112628624  | 4.203035966 | 1.384824435  | 0.198075671 | 0.198075671 | -4.798143722 |
| 1433448_at   | -0.132965742 | 6.959554806 | -1.38477451  | 0.198090444 | 0.198090444 | -4.798197876 |
| 1441343_at   | -0.128932748 | 5.09835322  | -1.384669753 | 0.198121444 | 0.198121444 | -4.798311504 |
| 1422053_at   | 0.165066437  | 9.098607121 | 1.384568969  | 0.198151273 | 0.198151273 | -4.798420819 |
| 1442692_at   | -0.147971781 | 5.716708803 | -1.384307837 | 0.198228578 | 0.198228578 | -4.79870403  |
| 1429821_at   | -0.124785144 | 6.501838803 | -1.384235436 | 0.198250016 | 0.198250016 | -4.798782547 |
| 1422249_s_at | 0.142504425  | 4.79888377  | 1.384200783  | 0.198260277 | 0.198260277 | -4.798820127 |
| 1450402_at   | 0.196250546  | 5.717903904 | 1.384140145  | 0.198278234 | 0.198278234 | -4.798885884 |
| 1441413_at   | 0.148846133  | 5.492869985 | 1.384137872  | 0.198278908 | 0.198278908 | -4.798888349 |
| 1440446_at   | -0.111156053 | 5.758926595 | -1.383939778 | 0.198337581 | 0.198337581 | -4.799103154 |
| 1420426_at   | -0.10628422  | 5.994653969 | -1.383866831 | 0.19835919  | 0.19835919  | -4.79918225  |
| 1431675_a_at | 0.122914137  | 5.974530688 | 1.383634169  | 0.198428127 | 0.198428127 | -4.799434508 |
| 1455975_x_at | 0.151130047  | 8.938177284 | 1.383622011  | 0.19843173  | 0.19843173  | -4.799447689 |
| 1437118_at   | 0.149546518  | 6.398705632 | 1.383477381  | 0.198474594 | 0.198474594 | -4.799604486 |
| 1440518_at   | -0.117036901 | 3.666626526 | -1.383246877 | 0.198542925 | 0.198542925 | -4.79985436  |
| 1418334_at   | 0.109653237  | 9.107606885 | 1.38314919   | 0.19857189  | 0.19857189  | -4.799960249 |
| 1449514_at   | 0.12347742   | 7.425850644 | 1.383091184  | 0.198589091 | 0.198589091 | -4.800023123 |
| 1460365_a_at | -0.211366143 | 9.891231172 | -1.383086956 | 0.198590345 | 0.198590345 | -4.800027705 |
| 1453565_at   | 0.119582704  | 4.210190369 | 1.38293972   | 0.198634011 | 0.198634011 | -4.80018729  |
| 1427926_at   | 0.100684601  | 4.246639943 | 1.38291123   | 0.198642461 | 0.198642461 | -4.800218169 |
| 1439919_at   | -0.118364161 | 4.281934015 | -1.382884634 | 0.19865035  | 0.19865035  | -4.800246993 |
| 1451579_at   | -0.102516315 | 4.342519569 | -1.382840046 | 0.198663576 | 0.198663576 | -4.800295317 |
| 1421239_at   | 0.158333387  | 7.333547764 | 1.382788913  | 0.198678745 | 0.198678745 | -4.800350734 |
| 1420766_at   | -0.11145579  | 5.446512217 | -1.382676469 | 0.198712105 | 0.198712105 | -4.800472594 |
| 1452147_at   | 0.117791894  | 9.968463724 | 1.3825928    | 0.198736931 | 0.198736931 | -4.800563265 |
| 1428706_at   | -0.115916741 | 7.704221903 | -1.382568249 | 0.198744216 | 0.198744216 | -4.80058987  |
| 1417271_a_at | 0.134396968  | 8.22144566  | 1.38250039   | 0.198764353 | 0.198764353 | -4.800663404 |



|              |              |             |              |             |             |              |
|--------------|--------------|-------------|--------------|-------------|-------------|--------------|
| 1450714_at   | 0.085510247  | 10.16801378 | 1.382260553  | 0.19883554  | 0.19883554  | -4.800923283 |
| 1419969_at   | 0.109437803  | 3.634844487 | 1.382229086  | 0.198844882 | 0.198844882 | -4.800957378 |
| 1429700_at   | -0.148315819 | 3.927690061 | -1.382001003 | 0.198912602 | 0.198912602 | -4.801204491 |
| 1456670_at   | 0.165531177  | 4.362819338 | 1.381936532  | 0.198931748 | 0.198931748 | -4.801274337 |
| 1443730_at   | -0.099143146 | 5.916494618 | -1.381821768 | 0.198965833 | 0.198965833 | -4.801398664 |
| 1421079_at   | 0.11868278   | 3.828779128 | 1.381811442  | 0.1989689   | 0.1989689   | -4.80140985  |
| 1457755_at   | -0.095126389 | 6.845907299 | -1.381790602 | 0.19897509  | 0.19897509  | -4.801432426 |
| 1437762_at   | -0.102258022 | 3.407573098 | -1.381710518 | 0.198998879 | 0.198998879 | -4.801519178 |
| 1434698_at   | -0.087513698 | 7.952537839 | -1.381695904 | 0.199003221 | 0.199003221 | -4.801535009 |
| 1431543_at   | -0.219321369 | 4.360727684 | -1.38167989  | 0.199007978 | 0.199007978 | -4.801552356 |
| 1423960_at   | 0.097026015  | 9.190492878 | 1.381651095  | 0.199016532 | 0.199016532 | -4.801583546 |
| 1450829_at   | 0.107537163  | 5.18186531  | 1.381561924  | 0.199043026 | 0.199043026 | -4.801680136 |
| 1436291_a_at | 0.117082611  | 3.876266826 | 1.381553532  | 0.199045519 | 0.199045519 | -4.801689226 |
| 1448580_at   | -0.103615242 | 8.954131065 | -1.381553049 | 0.199045663 | 0.199045663 | -4.801689749 |
| 1432947_at   | 0.112867078  | 5.42764682  | 1.381542016  | 0.199048941 | 0.199048941 | -4.8017017   |
| 1433097_at   | -0.166807117 | 3.985787382 | -1.381526952 | 0.199053417 | 0.199053417 | -4.801718016 |
| 1444432_at   | -0.208673772 | 7.692447801 | -1.381497167 | 0.199062267 | 0.199062267 | -4.801750277 |
| 1454709_at   | -0.097380086 | 9.720962064 | -1.381486274 | 0.199065504 | 0.199065504 | -4.801762076 |
| 1433311_at   | -0.104735299 | 5.364904961 | -1.381462588 | 0.199072543 | 0.199072543 | -4.801787732 |
| 1429094_at   | -0.09601103  | 6.688710857 | -1.38139091  | 0.199093843 | 0.199093843 | -4.801865366 |
| 1434688_x_at | 0.09328111   | 8.465548167 | 1.38127203   | 0.199129175 | 0.199129175 | -4.801994121 |
| 1427030_at   | -0.095613449 | 7.885946624 | -1.381251934 | 0.199135149 | 0.199135149 | -4.802015885 |
| 1424394_at   | 0.20901974   | 9.82704248  | 1.381244495  | 0.19913736  | 0.19913736  | -4.802023942 |
| 1426086_a_at | -0.108359842 | 7.690048148 | -1.381227809 | 0.199142319 | 0.199142319 | -4.802042013 |
| 1427655_a_at | 0.122991105  | 3.86469795  | 1.381088738  | 0.199183662 | 0.199183662 | -4.802192624 |
| 1437818_at   | 0.098531938  | 3.6130578   | 1.381061262  | 0.199191831 | 0.199191831 | -4.802222379 |
| 1447646_at   | -0.166251126 | 4.208939525 | -1.381007359 | 0.199207857 | 0.199207857 | -4.802280752 |
| 1457154_at   | -0.217274512 | 6.361174183 | -1.380909603 | 0.199236925 | 0.199236925 | -4.802386609 |
| 1429731_at   | 0.10925437   | 5.541405025 | 1.380904258  | 0.199238514 | 0.199238514 | -4.802392397 |
| 1435777_at   | -0.120634836 | 9.178305614 | -1.380889592 | 0.199242875 | 0.199242875 | -4.802408278 |
| 1423372_at   | 0.092658182  | 8.52284712  | 1.380822369  | 0.199262867 | 0.199262867 | -4.80248107  |
| 1421117_at   | 0.16221349   | 8.389350819 | 1.380731651  | 0.199289848 | 0.199289848 | -4.802579299 |
| 1431207_at   | 0.149981463  | 5.964022251 | 1.380660336  | 0.19931106  | 0.19931106  | -4.802656515 |
| 1457684_at   | -0.104910152 | 4.112460683 | -1.380542815 | 0.199346021 | 0.199346021 | -4.802783756 |
| 1419140_at   | -0.141311157 | 6.869763205 | -1.380538303 | 0.199347364 | 0.199347364 | -4.802788642 |
| 1419100_at   | 0.160141776  | 4.803776705 | 1.380448718  | 0.199374017 | 0.199374017 | -4.802885631 |
| 1447948_at   | 0.127345409  | 6.718292668 | 1.380374232  | 0.199396181 | 0.199396181 | -4.802966272 |
| 1450117_at   | 0.098465041  | 9.572848925 | 1.380368625  | 0.199397849 | 0.199397849 | -4.802972341 |
| 1446653_at   | -0.137768553 | 5.628572954 | -1.380132403 | 0.199468153 | 0.199468153 | -4.803228062 |
| 1454855_at   | -0.133939208 | 6.989591448 | -1.380091521 | 0.199480322 | 0.199480322 | -4.803272316 |
| 1457786_at   | -0.118978395 | 3.775760222 | -1.380062231 | 0.199489042 | 0.199489042 | -4.803304021 |
| 1430051_at   | 0.120107654  | 4.58092688  | 1.380032008  | 0.199498039 | 0.199498039 | -4.803336735 |
| 1431496_at   | -0.145405713 | 5.045877181 | -1.379978891 | 0.199513852 | 0.199513852 | -4.80339423  |
| 1441479_at   | 0.093871738  | 6.021050595 | 1.379935467  | 0.199526781 | 0.199526781 | -4.803441233 |
| 1443210_at   | -0.161400425 | 3.593009999 | -1.379929186 | 0.199528651 | 0.199528651 | -4.803448031 |
| 1434579_x_at | 0.08963515   | 11.46891436 | 1.37979412   | 0.199568868 | 0.199568868 | -4.80359422  |
| 1443518_at   | 0.158159711  | 6.057905055 | 1.379743569  | 0.199583923 | 0.199583923 | -4.803648932 |
| 1460120_at   | 0.120487008  | 3.482269731 | 1.379680982  | 0.199602562 | 0.199602562 | -4.803716669 |
| 1437533_at   | 0.086210939  | 10.07944451 | 1.379667194  | 0.199606669 | 0.199606669 | -4.803731592 |
| 1455956_x_at | 0.112457179  | 11.89574312 | 1.379663927  | 0.199607642 | 0.199607642 | -4.803735127 |
| 1459497_at   | 0.132796966  | 6.929914055 | 1.379550635  | 0.199641387 | 0.199641387 | -4.803857735 |
| 1442389_at   | -0.124290156 | 5.101753341 | -1.379495433 | 0.199657831 | 0.199657831 | -4.803917475 |
| 1439780_at   | 0.340720962  | 6.946594056 | 1.379471582  | 0.199664937 | 0.199664937 | -4.803943285 |

|              |              |             |              |             |             |              |
|--------------|--------------|-------------|--------------|-------------|-------------|--------------|
| 1418264_at   | -0.19029922  | 8.564086984 | -1.379462179 | 0.199667738 | 0.199667738 | -4.803953461 |
| 1424609_a_at | 0.156060715  | 10.19419491 | 1.379453243  | 0.1996704   | 0.1996704   | -4.803963131 |
| 1435803_a_at | 0.105837337  | 10.06501459 | 1.379387368  | 0.199690026 | 0.199690026 | -4.804034417 |
| 1437745_at   | 0.236907505  | 6.93260129  | 1.379376183  | 0.199693359 | 0.199693359 | -4.804046521 |
| 1436057_at   | -0.23693016  | 7.570458234 | -1.379140351 | 0.199763635 | 0.199763635 | -4.804301707 |
| 1433753_x_at | -0.089008616 | 8.107751751 | -1.379024658 | 0.199798118 | 0.199798118 | -4.804426884 |
| 1423754_at   | 0.100211398  | 10.28960659 | 1.379023432  | 0.199798484 | 0.199798484 | -4.80442821  |
| 1453748_a_at | -0.108844063 | 5.9449045   | -1.378923126 | 0.199828385 | 0.199828385 | -4.804536734 |
| 1433385_at   | 0.118794204  | 4.665614229 | 1.378861118  | 0.199846871 | 0.199846871 | -4.804603819 |
| 1440606_at   | -0.181656045 | 5.480391093 | -1.378737966 | 0.199883591 | 0.199883591 | -4.80473705  |
| 1440187_at   | 0.129555153  | 6.087353567 | 1.378682409  | 0.199900158 | 0.199900158 | -4.804797153 |
| 1432162_s_at | 0.1488275    | 4.2913497   | 1.378637831  | 0.199913452 | 0.199913452 | -4.804845376 |
| 1429624_at   | 0.167028822  | 8.579673928 | 1.37860114   | 0.199924395 | 0.199924395 | -4.804885067 |
| 1437666_x_at | -0.300092133 | 12.04656163 | -1.378310479 | 0.200011097 | 0.200011097 | -4.805199467 |
| 1429658_a_at | 0.396560693  | 7.737468371 | 1.378266675  | 0.200024167 | 0.200024167 | -4.805246846 |
| 1425017_at   | -0.083240658 | 3.699966632 | -1.378230703 | 0.2000349   | 0.2000349   | -4.805285753 |
| 1424699_at   | 0.131447785  | 7.821693726 | 1.378135579  | 0.200063285 | 0.200063285 | -4.805388633 |
| 1424706_at   | 0.175708078  | 6.14237295  | 1.378099612  | 0.200074018 | 0.200074018 | -4.805427533 |
| 1449723_at   | 0.119486768  | 4.105789613 | 1.377761131  | 0.200175053 | 0.200175053 | -4.805793574 |
| 1459537_at   | 0.131162983  | 6.023400399 | 1.377659911  | 0.200205275 | 0.200205275 | -4.805903025 |
| 1452191_at   | 0.255027329  | 8.381009007 | 1.377632689  | 0.200213404 | 0.200213404 | -4.80593246  |
| 1443012_at   | -0.189453949 | 5.846760607 | -1.377495965 | 0.200254234 | 0.200254234 | -4.806080292 |
| 1435240_at   | 0.114646546  | 8.680874159 | 1.37737967   | 0.200288969 | 0.200288969 | -4.806206029 |
| 1433844_a_at | -0.115622253 | 4.576500944 | -1.377314466 | 0.200308446 | 0.200308446 | -4.806276524 |
| 1427461_at   | 0.204739633  | 8.107182672 | 1.377285115  | 0.200317214 | 0.200317214 | -4.806308255 |
| 1450179_at   | 0.113657848  | 4.810166531 | 1.377264576  | 0.20032335  | 0.20032335  | -4.80633046  |
| 1456346_at   | -0.100938167 | 8.127816659 | -1.377229993 | 0.200333682 | 0.200333682 | -4.806367848 |
| 1438767_at   | -0.121740429 | 6.488516986 | -1.377117241 | 0.20036737  | 0.20036737  | -4.806489739 |
| 1445879_at   | 0.238470622  | 6.441245209 | 1.377049708  | 0.20038755  | 0.20038755  | -4.806562743 |
| 1440927_x_at | 0.118339185  | 3.258266173 | 1.376933726  | 0.200422211 | 0.200422211 | -4.806688117 |
| 1444178_at   | -0.089031197 | 4.96420891  | -1.376814523 | 0.20045784  | 0.20045784  | -4.806816964 |
| 1418487_at   | 0.119084785  | 5.699672424 | 1.376764783  | 0.200472709 | 0.200472709 | -4.806870727 |
| 1459963_at   | -0.089787738 | 5.782938462 | -1.376748752 | 0.200477502 | 0.200477502 | -4.806888055 |
| 1440901_at   | -0.128057711 | 4.897031262 | -1.37666824  | 0.200501571 | 0.200501571 | -4.806975075 |
| 1428900_s_at | 0.132922315  | 7.387015469 | 1.376664532  | 0.20050268  | 0.20050268  | -4.806979083 |
| 1450368_a_at | 0.118917433  | 5.997365912 | 1.376572424  | 0.200530219 | 0.200530219 | -4.807078632 |
| 1442247_at   | 0.149937595  | 4.862479803 | 1.376540063  | 0.200539896 | 0.200539896 | -4.807113606 |
| 1440259_at   | -0.093681326 | 7.540987249 | -1.376514761 | 0.200547462 | 0.200547462 | -4.807140952 |
| 1457118_at   | 0.166834222  | 5.795065251 | 1.376436308  | 0.200570923 | 0.200570923 | -4.807225737 |
| 1416451_s_at | 0.110401255  | 7.501551483 | 1.376422296  | 0.200575113 | 0.200575113 | -4.80724088  |
| 1460289_at   | -0.111603402 | 3.736436754 | -1.376408459 | 0.200579251 | 0.200579251 | -4.807255834 |
| 1415968_a_at | -0.085200415 | 6.047701636 | -1.376252685 | 0.200625843 | 0.200625843 | -4.807424171 |
| 1454229_a_at | 0.104544417  | 6.687524979 | 1.376198359  | 0.200642095 | 0.200642095 | -4.807482876 |
| 1444197_at   | -0.112568757 | 4.452568999 | -1.37612339  | 0.200664523 | 0.200664523 | -4.807563885 |
| 1419001_at   | -0.11888969  | 5.199695972 | -1.375980076 | 0.200707403 | 0.200707403 | -4.807718739 |
| 1417965_at   | 0.105188608  | 9.000253696 | 1.375979076  | 0.200707702 | 0.200707702 | -4.807719819 |
| 1419083_at   | -0.135185083 | 4.175590446 | -1.375969368 | 0.200710607 | 0.200710607 | -4.807730308 |
| 1455587_at   | -0.092996192 | 6.37984695  | -1.375930641 | 0.200722196 | 0.200722196 | -4.807772151 |
| 1424688_at   | -0.099715331 | 7.365640069 | -1.375679358 | 0.200797405 | 0.200797405 | -4.808043637 |
| 1444222_x_at | -0.110428627 | 8.649485656 | -1.37545422  | 0.200864809 | 0.200864809 | -4.808286849 |
| 1441634_at   | 0.157332356  | 4.633045613 | 1.375341866  | 0.200898454 | 0.200898454 | -4.808408215 |
| 1437036_at   | -0.113087369 | 3.729131734 | -1.375324727 | 0.200903587 | 0.200903587 | -4.808426727 |
| 1459732_at   | 0.129432571  | 3.799405363 | 1.375324698  | 0.200903595 | 0.200903595 | -4.808426758 |

|              |              |             |              |             |             |              |
|--------------|--------------|-------------|--------------|-------------|-------------|--------------|
| 1447252_s_at | 0.101513604  | 3.510039221 | 1.375268299  | 0.200920487 | 0.200920487 | -4.808487678 |
| 1451167_at   | 0.090703599  | 7.088311057 | 1.375182713  | 0.200946121 | 0.200946121 | -4.808580121 |
| 1420843_at   | 0.099526416  | 10.83016987 | 1.375060899  | 0.200982612 | 0.200982612 | -4.808711689 |
| 1445907_at   | 0.145961333  | 4.25769558  | 1.374995719  | 0.20100214  | 0.20100214  | -4.808782085 |
| 1418722_at   | -0.192231828 | 4.787335394 | -1.374933777 | 0.201020698 | 0.201020698 | -4.808848981 |
| 1452115_a_at | -0.123884576 | 7.992359953 | -1.374915013 | 0.201026321 | 0.201026321 | -4.808869246 |
| 1441853_at   | 0.094273271  | 3.353559439 | 1.374883467  | 0.201035773 | 0.201035773 | -4.808903314 |
| 1420773_at   | -0.084203404 | 3.624831795 | -1.374848536 | 0.201046241 | 0.201046241 | -4.808941038 |
| 1446269_at   | -0.160717719 | 4.115912002 | -1.374836867 | 0.201049737 | 0.201049737 | -4.80895364  |
| 1428709_a_at | -0.108701285 | 10.12733479 | -1.374823834 | 0.201053643 | 0.201053643 | -4.808967714 |
| 1426418_at   | -0.094115212 | 6.720738242 | -1.374676604 | 0.201097768 | 0.201097768 | -4.809126707 |
| 1438093_x_at | 0.093323426  | 9.692422413 | 1.37444039   | 0.201168578 | 0.201168578 | -4.809381769 |
| 1418842_at   | 0.158361408  | 5.050655458 | 1.374419829  | 0.201174743 | 0.201174743 | -4.809403969 |
| 1430940_at   | -0.150586577 | 7.197322636 | -1.374287066 | 0.201214552 | 0.201214552 | -4.809547313 |
| 1428930_at   | 0.134651192  | 7.843732598 | 1.374201584  | 0.201240188 | 0.201240188 | -4.809639603 |
| 1452349_x_at | 0.201282959  | 4.764049138 | 1.374034475  | 0.20129031  | 0.20129031  | -4.809820011 |
| 1455753_at   | -0.201271767 | 4.870945515 | -1.373985041 | 0.201305139 | 0.201305139 | -4.809873376 |
| 1418607_at   | 0.10606104   | 6.546141005 | 1.373861724  | 0.201342136 | 0.201342136 | -4.810006495 |
| 1440447_at   | -0.107257676 | 4.228549517 | -1.373766102 | 0.201370828 | 0.201370828 | -4.810109712 |
| 1419304_at   | -0.121537593 | 4.904565099 | -1.37366671  | 0.201400655 | 0.201400655 | -4.810216995 |
| 1460584_at   | 0.137786304  | 6.903641982 | 1.373643088  | 0.201407744 | 0.201407744 | -4.810242492 |
| 1436269_s_at | 0.104844695  | 8.010413696 | 1.37340528   | 0.201479126 | 0.201479126 | -4.810499157 |
| 1432556_a_at | -0.511023641 | 5.868016077 | -1.373397014 | 0.201481607 | 0.201481607 | -4.810508077 |
| 1421319_at   | -0.183019915 | 5.665169611 | -1.373367352 | 0.201490513 | 0.201490513 | -4.81054009  |
| 1430483_a_at | 0.097087694  | 5.512197017 | 1.37333557   | 0.201500055 | 0.201500055 | -4.810574389 |
| 1448556_at   | 0.116835686  | 3.908838671 | 1.373216484  | 0.201535811 | 0.201535811 | -4.810702903 |
| 1431648_at   | 0.095754732  | 3.666590091 | 1.373199559  | 0.201540894 | 0.201540894 | -4.810721168 |
| 1415809_at   | 0.147138886  | 3.406297341 | 1.373105397  | 0.201569171 | 0.201569171 | -4.810822779 |
| 1428979_at   | -0.091793446 | 6.894683928 | -1.373004869 | 0.201599364 | 0.201599364 | -4.810931256 |
| 1424398_at   | 0.15366155   | 9.901390462 | 1.37297414   | 0.201608594 | 0.201608594 | -4.810964413 |
| 1420700_s_at | -0.089147881 | 5.535574685 | -1.37295703  | 0.201613734 | 0.201613734 | -4.810982876 |
| 1453354_at   | 0.136738634  | 3.980860708 | 1.372905034  | 0.201629353 | 0.201629353 | -4.81103898  |
| 1455219_at   | -0.303350751 | 4.922013224 | -1.372878422 | 0.201637347 | 0.201637347 | -4.811067694 |
| 1437499_at   | -0.086746368 | 6.864012254 | -1.372760619 | 0.201672739 | 0.201672739 | -4.811194797 |
| 1431524_at   | -0.136104943 | 4.406087208 | -1.372660924 | 0.201702695 | 0.201702695 | -4.811302358 |
| 1422147_a_at | -0.120873622 | 7.801085871 | -1.37251123  | 0.201747681 | 0.201747681 | -4.811463854 |
| 1430705_at   | 0.122033036  | 6.718847979 | 1.372509405  | 0.20174823  | 0.20174823  | -4.811465823 |
| 1424803_at   | -0.135608522 | 7.771824804 | -1.372277858 | 0.201817832 | 0.201817832 | -4.811715603 |
| 1428597_at   | -0.123951504 | 6.041557647 | -1.372217351 | 0.201836023 | 0.201836023 | -4.811780871 |
| 1448141_at   | -0.108062157 | 7.816741713 | -1.37221305  | 0.201837317 | 0.201837317 | -4.81178551  |
| 1418820_s_at | 0.215799827  | 6.763670799 | 1.372156048  | 0.201854456 | 0.201854456 | -4.811846995 |
| 1460530_at   | 0.151527326  | 4.308463738 | 1.372123618  | 0.201864207 | 0.201864207 | -4.811881975 |
| 1432727_at   | 0.103193542  | 5.689572185 | 1.372060953  | 0.201883051 | 0.201883051 | -4.811949565 |
| 1417942_at   | 0.144998073  | 5.962809114 | 1.37205232   | 0.201885647 | 0.201885647 | -4.811958877 |
| 1444280_at   | -0.139104198 | 4.631376853 | -1.371940116 | 0.201919392 | 0.201919392 | -4.812079894 |
| 1442638_at   | -0.118077572 | 3.713136559 | -1.371933731 | 0.201921312 | 0.201921312 | -4.81208678  |
| 1416859_at   | 0.089043199  | 10.69610281 | 1.371848568  | 0.201946928 | 0.201946928 | -4.812178629 |
| 1418425_at   | -0.194659195 | 9.472804219 | -1.371689767 | 0.201994701 | 0.201994701 | -4.812349888 |
| 1432455_a_at | -0.120599358 | 3.513267007 | -1.371669539 | 0.202000787 | 0.202000787 | -4.812371701 |
| 1448458_at   | 0.146917135  | 6.716974768 | 1.371666307  | 0.202001759 | 0.202001759 | -4.812375186 |
| 1459890_s_at | 0.091934763  | 7.953673046 | 1.371612799  | 0.202017859 | 0.202017859 | -4.812432888 |
| 1438855_x_at | 0.200208177  | 6.989392949 | 1.371603737  | 0.202020585 | 0.202020585 | -4.81244266  |
| 1453093_at   | -0.152982913 | 5.227418467 | -1.371527071 | 0.202043655 | 0.202043655 | -4.812525332 |

|              |              |             |              |             |             |              |
|--------------|--------------|-------------|--------------|-------------|-------------|--------------|
| 1460658_at   | -0.095099261 | 3.381422388 | -1.371473235 | 0.202059856 | 0.202059856 | -4.812583385 |
| 1415794_a_at | 0.109290113  | 10.91801691 | 1.371452895  | 0.202065978 | 0.202065978 | -4.812605318 |
| 1447137_at   | 0.115135224  | 3.355634513 | 1.371347892  | 0.202097581 | 0.202097581 | -4.812718538 |
| 1458597_at   | -0.114660761 | 5.965249829 | -1.3713304   | 0.202102846 | 0.202102846 | -4.812737399 |
| 1416792_at   | -0.112432101 | 9.923463861 | -1.371265181 | 0.202122477 | 0.202122477 | -4.812807718 |
| 1452122_at   | -0.091577991 | 8.887040078 | -1.371223806 | 0.202134933 | 0.202134933 | -4.812852329 |
| 1434478_at   | 0.091266661  | 8.949666071 | 1.371175547  | 0.202149461 | 0.202149461 | -4.81290436  |
| 1431865_a_at | -0.138445078 | 3.834423    | -1.371099135 | 0.202172467 | 0.202172467 | -4.812986742 |
| 1426271_at   | 0.089448473  | 8.560513738 | 1.371050878  | 0.202186997 | 0.202186997 | -4.813038768 |
| 1437980_at   | -0.119757997 | 3.30308643  | -1.371013439 | 0.20219827  | 0.20219827  | -4.813079131 |
| 1444493_at   | -0.100927926 | 7.445646935 | -1.370830426 | 0.202253385 | 0.202253385 | -4.813276425 |
| 1452676_a_at | 0.111832173  | 8.302666143 | 1.370821685  | 0.202256018 | 0.202256018 | -4.813285847 |
| 1440613_at   | 0.144355048  | 5.6382824   | 1.370757454  | 0.202275365 | 0.202275365 | -4.813355087 |
| 1454433_at   | -0.092010732 | 3.37536846  | -1.370703242 | 0.202291695 | 0.202291695 | -4.813413524 |
| 1416746_at   | -0.141275383 | 10.79298303 | -1.370556331 | 0.202335954 | 0.202335954 | -4.813571878 |
| 1446372_at   | 0.086448976  | 6.788902164 | 1.370367506  | 0.202392853 | 0.202392853 | -4.813775395 |
| 1444341_at   | -0.324382527 | 6.326607698 | -1.370063174 | 0.202484586 | 0.202484586 | -4.814103369 |
| 1450955_s_at | -0.096629846 | 6.314449813 | -1.370015367 | 0.202499    | 0.202499    | -4.814154887 |
| 1424231_s_at | 0.113759745  | 7.465929353 | 1.369881435  | 0.202539383 | 0.202539383 | -4.814299206 |
| 1448978_at   | 0.096215498  | 5.150015974 | 1.369858213  | 0.202546386 | 0.202546386 | -4.814324228 |
| 1446925_at   | -0.109709104 | 4.494779785 | -1.369714802 | 0.202589637 | 0.202589637 | -4.814478751 |
| 1437210_a_at | 0.112665257  | 10.26524746 | 1.369500161  | 0.202654385 | 0.202654385 | -4.814710003 |
| 1430726_at   | 0.11970936   | 4.560102976 | 1.369491537  | 0.202656987 | 0.202656987 | -4.814719294 |
| 1454328_at   | 0.11272994   | 3.192595939 | 1.369410307  | 0.202681495 | 0.202681495 | -4.814806805 |
| 1438870_at   | 0.167576696  | 3.47597729  | 1.369280962  | 0.202720526 | 0.202720526 | -4.814946143 |
| 1417797_a_at | 0.212383297  | 5.787612298 | 1.36923638   | 0.20273398  | 0.20273398  | -4.814994168 |
| 1450208_a_at | -0.154917588 | 5.697666164 | -1.369211755 | 0.202741412 | 0.202741412 | -4.815020694 |
| 1430519_a_at | 0.103982942  | 8.61986071  | 1.369179926  | 0.202751018 | 0.202751018 | -4.81505498  |
| 1435869_s_at | 0.087374152  | 8.995139816 | 1.369172252  | 0.202753334 | 0.202753334 | -4.815063246 |
| 1459994_x_at | -0.133250425 | 4.281073867 | -1.369097716 | 0.202775832 | 0.202775832 | -4.815143533 |
| 1444034_at   | 0.189462715  | 4.348267949 | 1.369078007  | 0.202781782 | 0.202781782 | -4.815164763 |
| 1453896_at   | -0.102047833 | 5.170900437 | -1.36902633  | 0.202797381 | 0.202797381 | -4.815220425 |
| 1421808_at   | -0.117022642 | 3.422668429 | -1.368896312 | 0.202836634 | 0.202836634 | -4.815360465 |
| 1437404_at   | -0.108508318 | 7.375017958 | -1.368834315 | 0.202855353 | 0.202855353 | -4.815427238 |
| 1449910_at   | -0.147023252 | 5.549976433 | -1.368693683 | 0.202897821 | 0.202897821 | -4.815578696 |
| 1422930_at   | 0.109788198  | 4.274889396 | 1.36861907   | 0.202920355 | 0.202920355 | -4.815659048 |
| 1450574_at   | -0.092207783 | 4.425304179 | -1.368582433 | 0.202931421 | 0.202931421 | -4.815698504 |
| 1433806_x_at | -0.08987517  | 11.88030919 | -1.368302143 | 0.203016097 | 0.203016097 | -4.816000326 |
| 1441657_at   | 0.164388909  | 3.968810558 | 1.368289405  | 0.203019946 | 0.203019946 | -4.816014043 |
| 1425847_a_at | 0.103732071  | 3.631773682 | 1.368127125  | 0.203068985 | 0.203068985 | -4.816188771 |
| 1435033_at   | 0.135980766  | 6.490907118 | 1.368077445  | 0.203084    | 0.203084    | -4.816242259 |
| 1460143_at   | -0.15437017  | 3.782060392 | -1.36807505  | 0.203084723 | 0.203084723 | -4.816244837 |
| 1459139_at   | 0.144833378  | 4.364284313 | 1.367967592  | 0.203117204 | 0.203117204 | -4.816360529 |
| 1460729_at   | 0.231149966  | 8.008949531 | 1.367901421  | 0.203137207 | 0.203137207 | -4.816431767 |
| 1458782_at   | 0.113394651  | 3.380793021 | 1.367869959  | 0.203146718 | 0.203146718 | -4.816465638 |
| 1422047_at   | -0.145404912 | 4.584043213 | -1.367674155 | 0.203205921 | 0.203205921 | -4.816676421 |
| 1432250_at   | 0.142515276  | 6.180598468 | 1.367644039  | 0.203215028 | 0.203215028 | -4.816708839 |
| 1437205_at   | 0.113950394  | 8.823547988 | 1.367539074  | 0.203246772 | 0.203246772 | -4.816821825 |
| 1422335_at   | -0.129047069 | 5.58357018  | -1.367501333 | 0.203258187 | 0.203258187 | -4.816862448 |
| 1427782_a_at | -0.148535707 | 5.348310283 | -1.367472321 | 0.203266962 | 0.203266962 | -4.816893676 |
| 1446104_at   | -0.131653118 | 6.18532908  | -1.367471915 | 0.203267084 | 0.203267084 | -4.816894112 |
| 1459678_at   | 0.122614496  | 5.404031142 | 1.367299971  | 0.203319098 | 0.203319098 | -4.817079178 |
| 1457397_at   | -0.096182815 | 7.297397007 | -1.367271825 | 0.203327613 | 0.203327613 | -4.81710947  |

|              |              |             |              |             |             |              |
|--------------|--------------|-------------|--------------|-------------|-------------|--------------|
| 1460676_at   | 0.088502861  | 9.751427076 | 1.367132103  | 0.20336989  | 0.20336989  | -4.817259841 |
| 1429701_at   | -0.157762725 | 3.974859597 | -1.367129417 | 0.203370702 | 0.203370702 | -4.817262732 |
| 1424785_at   | -0.090561591 | 6.310790662 | -1.367055773 | 0.203392988 | 0.203392988 | -4.817341985 |
| 1459871_x_at | 0.113354084  | 6.986169829 | 1.367051542  | 0.203394269 | 0.203394269 | -4.817346539 |
| 1443817_x_at | 0.088630662  | 5.060053181 | 1.367032629  | 0.203399992 | 0.203399992 | -4.817366892 |
| 1438581_at   | -0.100000634 | 7.244464504 | -1.366974653 | 0.203417539 | 0.203417539 | -4.817429281 |
| 1433638_s_at | -0.097789384 | 5.281676899 | -1.366941713 | 0.203427509 | 0.203427509 | -4.817464728 |
| 1431487_at   | -0.114335467 | 3.974970886 | -1.366896871 | 0.203441082 | 0.203441082 | -4.817512982 |
| 1457177_at   | 0.108714496  | 7.963913958 | 1.366879332  | 0.20344639  | 0.20344639  | -4.817531854 |
| 1440372_at   | 0.118087005  | 7.947301183 | 1.366651033  | 0.203515506 | 0.203515506 | -4.817777506 |
| 1420670_at   | -0.122649691 | 4.715760753 | -1.366477972 | 0.203567911 | 0.203567911 | -4.817963704 |
| 1441331_at   | -0.140633571 | 8.659051048 | -1.366331759 | 0.203612196 | 0.203612196 | -4.818121005 |
| 1422512_a_at | 0.12034576   | 7.831427066 | 1.366308077  | 0.20361937  | 0.20361937  | -4.818146481 |
| 1458180_at   | -0.100148647 | 7.031714755 | -1.36625164  | 0.203636466 | 0.203636466 | -4.818207195 |
| 1432355_at   | 0.158013763  | 5.871297287 | 1.366244548  | 0.203638614 | 0.203638614 | -4.818214824 |
| 1450884_at   | -0.112960771 | 3.735808419 | -1.366238029 | 0.203640589 | 0.203640589 | -4.818221837 |
| 1446873_at   | 0.10817151   | 3.300911463 | 1.366110993  | 0.203679077 | 0.203679077 | -4.818358492 |
| 1449385_at   | -0.141888385 | 3.977974445 | -1.365972272 | 0.203721112 | 0.203721112 | -4.818507708 |
| 1435071_at   | 0.156616038  | 6.570519452 | 1.365556013  | 0.203847289 | 0.203847289 | -4.818955402 |
| 1423999_at   | 0.091016832  | 9.876422669 | 1.365487251  | 0.203868139 | 0.203868139 | -4.819029348 |
| 1429499_at   | 0.088976565  | 9.145973546 | 1.365354791  | 0.203908308 | 0.203908308 | -4.81917179  |
| 1439242_at   | -0.195753734 | 3.989505768 | -1.365318198 | 0.203919406 | 0.203919406 | -4.819211138 |
| 1440733_at   | -0.094801754 | 5.282695074 | -1.365316665 | 0.203919871 | 0.203919871 | -4.819212787 |
| 1442312_at   | 0.269130908  | 7.727449958 | 1.365313232  | 0.203920912 | 0.203920912 | -4.819216478 |
| 1436339_at   | 0.107410206  | 10.4363778  | 1.365177936  | 0.20396195  | 0.20396195  | -4.819361958 |
| 1416725_at   | 0.118290768  | 5.404181658 | 1.365173188  | 0.20396339  | 0.20396339  | -4.819367063 |
| 1423478_at   | -0.120218364 | 4.393601418 | -1.364780417 | 0.204082566 | 0.204082566 | -4.819789344 |
| 1432175_at   | 0.097097904  | 3.378396342 | 1.364671294  | 0.204115687 | 0.204115687 | -4.819906653 |
| 1427984_at   | 0.142146769  | 5.121821822 | 1.364646213  | 0.204123301 | 0.204123301 | -4.819933614 |
| 1455971_at   | 0.103506798  | 4.866985722 | 1.364518641  | 0.204162028 | 0.204162028 | -4.820070747 |
| 1416635_at   | -0.123027568 | 7.959594299 | -1.364448483 | 0.204183329 | 0.204183329 | -4.820146159 |
| 1445812_at   | 0.093292935  | 3.386846405 | 1.364319319  | 0.20422255  | 0.20422255  | -4.82028499  |
| 1417411_at   | 0.149158286  | 5.686428183 | 1.364309741  | 0.204225458 | 0.204225458 | -4.820295285 |
| 1453297_at   | -0.111621631 | 7.206409578 | -1.364258444 | 0.204241037 | 0.204241037 | -4.820350419 |
| 1421981_at   | -0.103657213 | 4.688732792 | -1.364026071 | 0.204311618 | 0.204311618 | -4.820600156 |
| 1427642_at   | 0.117346147  | 4.890820962 | 1.363881255  | 0.204355616 | 0.204355616 | -4.82075578  |
| 1427479_at   | 0.127614191  | 3.220749014 | 1.36379653   | 0.20438136  | 0.20438136  | -4.820846824 |
| 1459484_at   | -0.195191378 | 5.242029896 | -1.363764881 | 0.204390978 | 0.204390978 | -4.820880832 |
| 1449477_s_at | -0.135846647 | 6.846569595 | -1.363593435 | 0.204443084 | 0.204443084 | -4.821065051 |
| 1422426_at   | -0.104238797 | 5.260618932 | -1.363586929 | 0.204445061 | 0.204445061 | -4.821072041 |
| 1451619_at   | 0.139783208  | 7.115254556 | 1.363551331  | 0.204455882 | 0.204455882 | -4.821110289 |
| 1446959_at   | 0.12043187   | 3.747469005 | 1.363518811  | 0.204465767 | 0.204465767 | -4.821145229 |
| 1420963_at   | 0.111463499  | 4.292693105 | 1.363350293  | 0.204516999 | 0.204516999 | -4.821326282 |
| 1455101_at   | -0.231663388 | 7.794710322 | -1.363346735 | 0.20451808  | 0.20451808  | -4.821330104 |
| 1426872_at   | -0.154562302 | 5.792855866 | -1.363343631 | 0.204519024 | 0.204519024 | -4.821333439 |
| 1428277_at   | 0.095244178  | 8.51148711  | 1.363335701  | 0.204521435 | 0.204521435 | -4.821341959 |
| 1451397_at   | 0.096074944  | 8.820576622 | 1.363256306  | 0.204545577 | 0.204545577 | -4.821427253 |
| 1435812_at   | -0.087925438 | 7.289562102 | -1.363020045 | 0.20461743  | 0.20461743  | -4.821681053 |
| 1453130_at   | 0.103245588  | 5.669983179 | 1.362947703  | 0.204639436 | 0.204639436 | -4.82175876  |
| 1441814_s_at | 0.097576922  | 7.453533597 | 1.362853794  | 0.204668005 | 0.204668005 | -4.82185963  |
| 1455945_at   | 0.137699119  | 7.030458537 | 1.362746446  | 0.204700666 | 0.204700666 | -4.821974928 |
| 1431786_s_at | 0.119640496  | 6.272867524 | 1.362686561  | 0.204718888 | 0.204718888 | -4.822039247 |
| 1426053_a_at | 0.130018394  | 5.549670463 | 1.362560143  | 0.20475736  | 0.20475736  | -4.822175017 |

|              |              |             |              |             |             |              |
|--------------|--------------|-------------|--------------|-------------|-------------|--------------|
| 1431699_at   | -0.095255553 | 5.92315852  | -1.36249995  | 0.20477568  | 0.20477568  | -4.82223966  |
| 1437026_at   | -0.134918699 | 8.842452619 | -1.362453752 | 0.204789742 | 0.204789742 | -4.822289273 |
| 1457677_at   | 0.111373726  | 6.359319674 | 1.362408642  | 0.204803474 | 0.204803474 | -4.822337716 |
| 1460104_at   | 0.133260128  | 4.329097692 | 1.362377748  | 0.204812878 | 0.204812878 | -4.822370892 |
| 1430792_at   | 0.206705049  | 5.737727412 | 1.362357646  | 0.204818998 | 0.204818998 | -4.822392479 |
| 1426272_at   | 0.106588725  | 7.77066684  | 1.362303064  | 0.204835615 | 0.204835615 | -4.822451091 |
| 1459276_at   | -0.107190098 | 4.855568314 | -1.362231684 | 0.204857347 | 0.204857347 | -4.82252774  |
| 1449695_at   | -0.101215502 | 3.888070258 | -1.36216766  | 0.204876841 | 0.204876841 | -4.822596487 |
| 1456432_at   | -0.107837861 | 3.795712977 | -1.362154205 | 0.204880939 | 0.204880939 | -4.822610935 |
| 1424245_at   | -0.130349239 | 4.893408883 | -1.362085393 | 0.204901893 | 0.204901893 | -4.82268482  |
| 1445398_at   | 0.158184048  | 4.952175704 | 1.362067219  | 0.204907428 | 0.204907428 | -4.822704334 |
| 1455594_at   | 0.106355497  | 8.347267824 | 1.362057562  | 0.204910369 | 0.204910369 | -4.822714703 |
| 1416241_at   | -0.104672491 | 10.52801155 | -1.362014812 | 0.204923388 | 0.204923388 | -4.822760604 |
| 1451037_at   | 0.14497554   | 9.19413457  | 1.361824937  | 0.204981223 | 0.204981223 | -4.82296446  |
| 1453372_at   | -0.126142303 | 6.149942324 | -1.361554283 | 0.205063686 | 0.205063686 | -4.823255014 |
| 1436395_at   | -0.141139133 | 6.411440858 | -1.361548109 | 0.205065568 | 0.205065568 | -4.823261641 |
| 1447958_at   | -0.142702736 | 4.418414561 | -1.361500756 | 0.205079998 | 0.205079998 | -4.823312472 |
| 1430805_s_at | 0.138286229  | 8.032850103 | 1.361419297  | 0.205104825 | 0.205104825 | -4.823399911 |
| 1447856_x_at | -0.111211044 | 3.681985786 | -1.3613228   | 0.205134238 | 0.205134238 | -4.823503488 |
| 1428825_at   | 0.129871528  | 5.356614002 | 1.36131426   | 0.205136841 | 0.205136841 | -4.823512654 |
| 1449780_at   | -0.089783254 | 3.92977446  | -1.36128017  | 0.205147232 | 0.205147232 | -4.823549244 |
| 1449235_at   | 0.13155027   | 3.497927918 | 1.36123802   | 0.205160082 | 0.205160082 | -4.823594484 |
| 1437110_at   | 0.178469499  | 9.006971698 | 1.361130573  | 0.20519284  | 0.20519284  | -4.823709805 |
| 1444507_at   | 0.125493459  | 6.408632565 | 1.3609731    | 0.205240857 | 0.205240857 | -4.823878806 |
| 1425343_at   | -0.140700603 | 6.934679528 | -1.360953842 | 0.20524673  | 0.20524673  | -4.823899473 |
| 1428748_at   | 0.120847532  | 9.03114863  | 1.360896348  | 0.205264265 | 0.205264265 | -4.823961172 |
| 1455943_at   | 0.094101696  | 7.446154641 | 1.36081818   | 0.205288106 | 0.205288106 | -4.824045056 |
| 1426731_at   | -0.326103931 | 6.816859888 | -1.360801435 | 0.205293214 | 0.205293214 | -4.824063024 |
| 1426399_at   | 0.116110405  | 5.920142929 | 1.360710706  | 0.20532089  | 0.20532089  | -4.824160383 |
| 1458397_at   | -0.151500637 | 4.240708668 | -1.36066179  | 0.205335812 | 0.205335812 | -4.824212871 |
| 1437585_x_at | 0.156804858  | 8.482912115 | 1.360530389  | 0.205375903 | 0.205375903 | -4.824353864 |
| 1431970_at   | -0.11916685  | 5.342992339 | -1.360162705 | 0.205488119 | 0.205488119 | -4.824748339 |
| 1428508_at   | -0.112108073 | 9.291501037 | -1.360161921 | 0.205488359 | 0.205488359 | -4.824749179 |
| 1439206_at   | -0.08827845  | 4.090450447 | -1.360057369 | 0.205520277 | 0.205520277 | -4.824861338 |
| 1424871_s_at | -0.100559978 | 7.898215069 | -1.360043928 | 0.205524381 | 0.205524381 | -4.824875756 |
| 1424367_a_at | 0.10689375   | 7.654255871 | 1.359890666  | 0.205571178 | 0.205571178 | -4.825040157 |
| 1421550_a_at | -0.126196409 | 5.946621498 | -1.359890417 | 0.205571254 | 0.205571254 | -4.825040424 |
| 1458571_at   | 0.158954427  | 3.853110772 | 1.359861014  | 0.205580233 | 0.205580233 | -4.825071963 |
| 1456939_at   | -0.202993569 | 5.99089872  | -1.359846463 | 0.205584677 | 0.205584677 | -4.82508757  |
| 1456379_x_at | -0.432728109 | 4.336344015 | -1.35982053  | 0.205592597 | 0.205592597 | -4.825115386 |
| 1431395_a_at | 0.142092074  | 5.5514168   | 1.359806754  | 0.205596804 | 0.205596804 | -4.825130162 |
| 1437433_at   | -0.109181268 | 3.075848935 | -1.359772429 | 0.205607287 | 0.205607287 | -4.825166979 |
| 1455871_s_at | 0.145298198  | 11.01751483 | 1.359572524  | 0.20566835  | 0.20566835  | -4.825381384 |
| 1439610_at   | 0.173517472  | 5.767813481 | 1.359540297  | 0.205678195 | 0.205678195 | -4.825415947 |
| 1430016_at   | 0.092068486  | 3.625397121 | 1.359503167  | 0.205689539 | 0.205689539 | -4.825455768 |
| 1454504_at   | -0.092087219 | 4.338708642 | -1.359485981 | 0.205694789 | 0.205694789 | -4.825474198 |
| 1438881_at   | -0.247549331 | 4.948113817 | -1.359418421 | 0.205715432 | 0.205715432 | -4.825546651 |
| 1445444_at   | 0.119253312  | 4.651178742 | 1.359406537  | 0.205719063 | 0.205719063 | -4.825559396 |
| 1447535_at   | 0.093688908  | 3.482386438 | 1.359368007  | 0.205730836 | 0.205730836 | -4.825600715 |
| 1445767_at   | -0.172837273 | 4.372682381 | -1.359327584 | 0.205743189 | 0.205743189 | -4.825644064 |
| 1425765_at   | -0.116426098 | 4.623251763 | -1.35925249  | 0.205766138 | 0.205766138 | -4.82572459  |
| 1451333_a_at | -0.092764784 | 6.680765939 | -1.358987483 | 0.205847142 | 0.205847142 | -4.826008747 |
| 1429633_at   | 0.137653726  | 7.978571687 | 1.358950067  | 0.205858581 | 0.205858581 | -4.826048864 |

|              |              |             |              |             |             |              |
|--------------|--------------|-------------|--------------|-------------|-------------|--------------|
| 1435935_at   | -0.108040469 | 6.933918936 | -1.35889387  | 0.205875763 | 0.205875763 | -4.826109117 |
| 1439560_x_at | -0.287538403 | 7.76139644  | -1.358866882 | 0.205884015 | 0.205884015 | -4.826138052 |
| 1417527_at   | -0.161597394 | 6.24300829  | -1.35882371  | 0.205897216 | 0.205897216 | -4.826184338 |
| 1440319_at   | -0.084865802 | 3.412509801 | -1.358799605 | 0.205904587 | 0.205904587 | -4.826210181 |
| 1451610_at   | -0.097427963 | 5.942032222 | -1.358767299 | 0.205914466 | 0.205914466 | -4.826244816 |
| 1450305_at   | 0.129429939  | 4.466361945 | 1.358460707  | 0.206008241 | 0.206008241 | -4.826573487 |
| 1435146_s_at | -0.144680927 | 3.853933873 | -1.35839816  | 0.206027377 | 0.206027377 | -4.826640532 |
| 1426960_a_at | -0.104731648 | 5.355162547 | -1.35834036  | 0.206045061 | 0.206045061 | -4.826702488 |
| 1438449_at   | 0.099092187  | 3.576324556 | 1.35829813   | 0.206057982 | 0.206057982 | -4.826747752 |
| 1438754_at   | 0.128418726  | 4.019344705 | 1.358117254  | 0.206113334 | 0.206113334 | -4.826941618 |
| 1445820_at   | -0.099220202 | 3.337231204 | -1.358077212 | 0.206125589 | 0.206125589 | -4.826984534 |
| 1421628_at   | -0.143573364 | 3.626303072 | -1.358019988 | 0.206143104 | 0.206143104 | -4.827045862 |
| 1434464_at   | -0.096100974 | 5.789024035 | -1.357945342 | 0.206165954 | 0.206165954 | -4.827125861 |
| 1434099_at   | -0.175267106 | 4.295239211 | -1.35790596  | 0.20617801  | 0.20617801  | -4.827168065 |
| 1459133_at   | 0.122239433  | 7.821893027 | 1.357747906  | 0.206226401 | 0.206226401 | -4.82733744  |
| 1447910_x_at | -0.103282722 | 8.43517591  | -1.357697845 | 0.206241729 | 0.206241729 | -4.827391083 |
| 1451282_at   | 0.09457179   | 5.061782061 | 1.357675463  | 0.206248583 | 0.206248583 | -4.827415067 |
| 1425295_at   | 0.136106267  | 3.391795991 | 1.357426236  | 0.206324914 | 0.206324914 | -4.827682111 |
| 1417816_s_at | -0.133061855 | 5.819362136 | -1.357147304 | 0.206410372 | 0.206410372 | -4.827980949 |
| 1417343_at   | -0.14734479  | 8.644118864 | -1.357136943 | 0.206413547 | 0.206413547 | -4.827992047 |
| 1444371_at   | -0.129936878 | 6.798370598 | -1.356924536 | 0.206478643 | 0.206478643 | -4.828219585 |
| 1426261_s_at | -0.175228548 | 6.517268186 | -1.356854532 | 0.206500101 | 0.206500101 | -4.828294571 |
| 1459481_at   | -0.098936371 | 3.285309302 | -1.356681006 | 0.2065533   | 0.2065533   | -4.828480435 |
| 1417369_at   | 0.08680962   | 9.92667016  | 1.356611925  | 0.206574482 | 0.206574482 | -4.828554424 |
| 1422598_at   | -0.184149893 | 5.833032103 | -1.356382247 | 0.206644918 | 0.206644918 | -4.828800402 |
| 1440484_at   | -0.207613935 | 6.494691168 | -1.356071061 | 0.206740385 | 0.206740385 | -4.829133632 |
| 1455521_at   | -0.121459742 | 7.849475625 | -1.356067285 | 0.206741543 | 0.206741543 | -4.829137675 |
| 1444246_at   | 0.112130478  | 7.569102921 | 1.355962378  | 0.206773735 | 0.206773735 | -4.829250002 |
| 1418498_at   | -0.105181123 | 5.573538354 | -1.355717701 | 0.206848834 | 0.206848834 | -4.829511964 |
| 1416666_at   | -0.090922784 | 12.56298076 | -1.355563583 | 0.206896149 | 0.206896149 | -4.829676955 |
| 1434140_at   | 0.139405905  | 7.376496339 | 1.355441809  | 0.206933541 | 0.206933541 | -4.829807312 |
| 1441143_at   | -0.09505835  | 4.884835677 | -1.355382865 | 0.206951643 | 0.206951643 | -4.829870408 |
| 1455076_a_at | 0.091155302  | 7.383138399 | 1.355374547  | 0.206954197 | 0.206954197 | -4.829879312 |
| 1459337_at   | -0.122167046 | 5.562450644 | -1.355365398 | 0.206957007 | 0.206957007 | -4.829889105 |
| 1458474_at   | -0.139245938 | 6.014460734 | -1.355330323 | 0.206967779 | 0.206967779 | -4.829926649 |
| 1434665_at   | -0.11807094  | 8.812764256 | -1.355324958 | 0.206969427 | 0.206969427 | -4.829932392 |
| 1435123_at   | 0.135737535  | 6.655247614 | 1.355212532  | 0.207003959 | 0.207003959 | -4.830052728 |
| 1428008_at   | 0.110381899  | 3.329852248 | 1.355129602  | 0.207029434 | 0.207029434 | -4.83014149  |
| 1444994_at   | -0.118416306 | 3.580538795 | -1.355066154 | 0.207048926 | 0.207048926 | -4.830209396 |
| 1436143_at   | -0.103367449 | 8.489721542 | -1.355033859 | 0.207058848 | 0.207058848 | -4.830243961 |
| 1436859_at   | 0.132894454  | 9.677051536 | 1.354997089  | 0.207070146 | 0.207070146 | -4.830283314 |
| 1449742_at   | 0.101666308  | 3.072357372 | 1.35460828   | 0.207189638 | 0.207189638 | -4.830699391 |
| 1421516_at   | -0.086704557 | 4.844253084 | -1.354473401 | 0.207231104 | 0.207231104 | -4.830843712 |
| 1457826_a_at | 0.086848625  | 9.745865459 | 1.354455213  | 0.207236696 | 0.207236696 | -4.830863172 |
| 1444964_at   | -0.129288531 | 5.028696784 | -1.354438876 | 0.207241719 | 0.207241719 | -4.830880652 |
| 1450556_at   | -0.106574327 | 5.608099062 | -1.354403328 | 0.207252649 | 0.207252649 | -4.830918687 |
| 1459606_at   | 0.090327098  | 3.44841343  | 1.35435655   | 0.207267033 | 0.207267033 | -4.830968736 |
| 1453158_at   | -0.139464634 | 4.257630596 | -1.354328776 | 0.207275574 | 0.207275574 | -4.830998451 |
| 1418910_at   | 0.158019126  | 7.029020489 | 1.354324634  | 0.207276848 | 0.207276848 | -4.831002883 |
| 1450076_at   | 0.090456997  | 6.379849139 | 1.354266681  | 0.20729467  | 0.20729467  | -4.831064885 |
| 1447980_s_at | -0.109433405 | 5.708184596 | -1.354240407 | 0.20730275  | 0.20730275  | -4.831092996 |
| 1442439_at   | 0.195706281  | 5.821366731 | 1.354224886  | 0.207307524 | 0.207307524 | -4.831109601 |
| 1451916_s_at | -0.108130844 | 3.99500769  | -1.354207206 | 0.207312961 | 0.207312961 | -4.831128515 |

|                     |              |             |              |             |             |              |
|---------------------|--------------|-------------|--------------|-------------|-------------|--------------|
| 1437293_x_at        | -0.125019256 | 3.484948405 | -1.354163283 | 0.20732647  | 0.20732647  | -4.831175506 |
| 1435522_a_at        | -0.108374459 | 11.17479915 | -1.353932422 | 0.207397488 | 0.207397488 | -4.831422472 |
| 1426446_at          | 0.131012662  | 5.321414448 | 1.353872331  | 0.207415977 | 0.207415977 | -4.83148675  |
| 1418926_at          | -0.094835382 | 9.732432233 | -1.353823796 | 0.207430911 | 0.207430911 | -4.831538667 |
| AFFX-r2-Bs-lys-3_at | 0.21001291   | 5.312668641 | 1.353697052  | 0.207469914 | 0.207469914 | -4.831674234 |
| 1420687_at          | 0.14093659   | 4.608806088 | 1.353641736  | 0.207486938 | 0.207486938 | -4.831733398 |
| 1451321_a_at        | -0.105270768 | 7.259236702 | -1.353544878 | 0.207516751 | 0.207516751 | -4.831836992 |
| 1445882_at          | -0.103886091 | 3.698756656 | -1.353544754 | 0.207516789 | 0.207516789 | -4.831837124 |
| 1448152_at          | -0.113142773 | 13.5661231  | -1.353484828 | 0.207535236 | 0.207535236 | -4.831901215 |
| 1439752_at          | -0.164572943 | 4.949375928 | -1.353462688 | 0.207542052 | 0.207542052 | -4.831924894 |
| 1458617_at          | -0.132892448 | 6.004354985 | -1.353456344 | 0.207544005 | 0.207544005 | -4.831931678 |
| 1435170_at          | 0.172970904  | 6.86242396  | 1.353427347  | 0.207552931 | 0.207552931 | -4.831962689 |
| 1438849_at          | -0.114936595 | 6.245073877 | -1.353329642 | 0.207583013 | 0.207583013 | -4.832067178 |
| 1449178_at          | -0.266199632 | 6.004464427 | -1.353199125 | 0.207623202 | 0.207623202 | -4.832206749 |
| 1429266_at          | -0.114833462 | 3.802355137 | -1.353146699 | 0.207639347 | 0.207639347 | -4.83226281  |
| 1426096_at          | -0.121348199 | 5.542315032 | -1.353121841 | 0.207647003 | 0.207647003 | -4.832289391 |
| 1419978_s_at        | 0.089767551  | 10.40949252 | 1.353003934  | 0.207683318 | 0.207683318 | -4.832415466 |
| 1422686_s_at        | 0.100337401  | 8.326055415 | 1.352972916  | 0.207692872 | 0.207692872 | -4.83244863  |
| 1437623_x_at        | 0.157849537  | 5.549770515 | 1.352870894  | 0.207724301 | 0.207724301 | -4.832557713 |
| 1419635_at          | 0.283343975  | 7.911893404 | 1.352859324  | 0.207727865 | 0.207727865 | -4.832570084 |
| 1459750_s_at        | 0.147215313  | 3.431736968 | 1.35279119   | 0.207748857 | 0.207748857 | -4.832642929 |
| 1443628_at          | 0.113432664  | 4.877809585 | 1.352687941  | 0.207780671 | 0.207780671 | -4.832753315 |
| 1416192_at          | 0.099204602  | 7.236969166 | 1.352671903  | 0.207785613 | 0.207785613 | -4.83277046  |
| 1447425_at          | -0.109065067 | 4.224056586 | -1.352525228 | 0.207830815 | 0.207830815 | -4.832927263 |
| 1452937_s_at        | 0.096102753  | 7.677479458 | 1.352484538  | 0.207843356 | 0.207843356 | -4.83297076  |
| 1434959_at          | 0.095221984  | 5.105173481 | 1.352396753  | 0.207870415 | 0.207870415 | -4.833064599 |
| 1423171_at          | -0.103349639 | 3.651579003 | -1.352326531 | 0.207892063 | 0.207892063 | -4.833139661 |
| 1439062_at          | -0.127306016 | 5.623469009 | -1.352277563 | 0.207907159 | 0.207907159 | -4.833192003 |
| 1459842_x_at        | -0.148741988 | 5.895551162 | -1.352214597 | 0.207926573 | 0.207926573 | -4.833259306 |
| 1439762_x_at        | -0.102115816 | 3.42829397  | -1.352108057 | 0.207959424 | 0.207959424 | -4.833373179 |
| 1458175_at          | -0.155898326 | 5.604777948 | -1.352056832 | 0.207975221 | 0.207975221 | -4.833427927 |
| 1445996_at          | -0.121573422 | 4.163174322 | -1.351890126 | 0.208026637 | 0.208026637 | -4.833606091 |
| 1427535_s_at        | -0.092011905 | 9.518023289 | -1.351823958 | 0.208047047 | 0.208047047 | -4.833676803 |
| 1459350_at          | 0.316146565  | 5.805040838 | 1.351793736  | 0.20805637  | 0.20805637  | -4.8337091   |
| 1459914_at          | -0.127311483 | 5.216618556 | -1.351734038 | 0.208074787 | 0.208074787 | -4.833772895 |
| 1455829_at          | 0.099455832  | 8.63581745  | 1.351691641  | 0.208087868 | 0.208087868 | -4.833818201 |
| 1442313_at          | 0.116586772  | 3.174376586 | 1.351678686  | 0.208091865 | 0.208091865 | -4.833832044 |
| 1422989_a_at        | -0.13366099  | 4.004335067 | -1.351676038 | 0.208092682 | 0.208092682 | -4.833834874 |
| 1448301_s_at        | 0.103320353  | 3.214510862 | 1.351552727  | 0.208130731 | 0.208130731 | -4.833966639 |
| 1416523_at          | 0.131021395  | 4.726142662 | 1.351541934  | 0.208134061 | 0.208134061 | -4.833978171 |
| 1457430_at          | -0.121616988 | 6.826836017 | -1.351508486 | 0.208144383 | 0.208144383 | -4.834013911 |
| 1448081_at          | 0.120053062  | 4.673957889 | 1.351485895  | 0.208151355 | 0.208151355 | -4.834038049 |
| 1455588_at          | 0.123377524  | 7.679185797 | 1.351386812  | 0.208181935 | 0.208181935 | -4.834143916 |
| 1450581_at          | -0.114999874 | 5.77269847  | -1.351341449 | 0.208195936 | 0.208195936 | -4.834192383 |
| 1444011_at          | -0.135013162 | 4.184242614 | -1.351206018 | 0.208237743 | 0.208237743 | -4.834337077 |
| 1416654_at          | -0.124414994 | 7.840112904 | -1.351202649 | 0.208238783 | 0.208238783 | -4.834340676 |
| 1441387_at          | 0.103335407  | 4.095429714 | 1.351132732  | 0.208260368 | 0.208260368 | -4.83441537  |
| 1416682_at          | 0.190876411  | 6.741992068 | 1.351067847  | 0.208280402 | 0.208280402 | -4.834484687 |
| 1428809_at          | 0.149758135  | 5.368302294 | 1.351041158  | 0.208288643 | 0.208288643 | -4.834513198 |
| 1450509_at          | -0.101467024 | 4.843407353 | -1.350931752 | 0.208322428 | 0.208322428 | -4.834630071 |
| 1417027_at          | 0.123766964  | 8.876679751 | 1.350889783  | 0.208335389 | 0.208335389 | -4.834674903 |
| 1429810_at          | 0.236045252  | 7.862400376 | 1.350852478  | 0.208346911 | 0.208346911 | -4.834714751 |
| 1453746_at          | 0.092049026  | 8.020491977 | 1.350741956  | 0.208381049 | 0.208381049 | -4.834832805 |



|              |              |             |              |             |             |              |
|--------------|--------------|-------------|--------------|-------------|-------------|--------------|
| 1420087_at   | 0.118046984  | 3.826798103 | 1.350634672  | 0.20841419  | 0.20841419  | -4.834947394 |
| 1455791_at   | 0.113445331  | 3.394328417 | 1.350459817  | 0.208468216 | 0.208468216 | -4.835134144 |
| 1422058_at   | -0.131697286 | 5.068645182 | -1.350459471 | 0.208468323 | 0.208468323 | -4.835134514 |
| 1440719_at   | 0.140116486  | 4.576008612 | 1.350402272  | 0.208485998 | 0.208485998 | -4.835195601 |
| 1460197_a_at | 0.148382849  | 6.491641647 | 1.350384874  | 0.208491375 | 0.208491375 | -4.835214181 |
| 1454677_at   | -0.141392289 | 11.1873218  | -1.350374994 | 0.208494428 | 0.208494428 | -4.835224733 |
| 1421858_at   | -0.141031318 | 8.64546767  | -1.350366449 | 0.208497069 | 0.208497069 | -4.835233858 |
| 1420053_at   | -0.111189493 | 6.113260417 | -1.35030597  | 0.20851576  | 0.20851576  | -4.835298445 |
| 1453751_at   | 0.16587726   | 5.883924753 | 1.350270202  | 0.208526815 | 0.208526815 | -4.835336641 |
| 1457652_x_at | -0.116243417 | 7.600317215 | -1.35015209  | 0.208563324 | 0.208563324 | -4.835462768 |
| 1430613_at   | 0.126194779  | 5.882922277 | 1.349952752  | 0.208624952 | 0.208624952 | -4.835675618 |
| 1456272_at   | -0.104266799 | 7.941315662 | -1.349858137 | 0.208654209 | 0.208654209 | -4.835776639 |
| 1448384_at   | -0.150363535 | 8.836891191 | -1.349744794 | 0.208689262 | 0.208689262 | -4.835897651 |
| 1437832_x_at | -0.127663931 | 7.778185834 | -1.3495758   | 0.208741534 | 0.208741534 | -4.836078066 |
| 1448503_at   | 0.083229222  | 10.66752011 | 1.349438178  | 0.208784111 | 0.208784111 | -4.836224979 |
| 1451951_at   | 0.08958892   | 3.356682196 | 1.349291909  | 0.208829371 | 0.208829371 | -4.836381112 |
| 1438289_a_at | 0.101538218  | 11.4947897  | 1.349255697  | 0.208840577 | 0.208840577 | -4.836419765 |
| 1454503_at   | -0.115786217 | 3.79137246  | -1.34922663  | 0.208849573 | 0.208849573 | -4.83645079  |
| 1430936_at   | -0.101191785 | 5.149218589 | -1.349197692 | 0.208858529 | 0.208858529 | -4.836481677 |
| 1453664_at   | 0.129186645  | 4.894154298 | 1.34918829   | 0.208861439 | 0.208861439 | -4.836491713 |
| 1444502_at   | -0.096343896 | 4.787483988 | -1.34910542  | 0.208887088 | 0.208887088 | -4.836580163 |
| 1434593_at   | 0.130171751  | 7.074930138 | 1.34898653   | 0.208923891 | 0.208923891 | -4.836707052 |
| 1417272_at   | -0.115211694 | 9.029187923 | -1.348957904 | 0.208932753 | 0.208932753 | -4.836737603 |
| 1416909_at   | -0.09395097  | 8.343036736 | -1.348830615 | 0.208972163 | 0.208972163 | -4.836873447 |
| 1432628_at   | -0.097354219 | 6.091398627 | -1.3488159   | 0.208976719 | 0.208976719 | -4.836889149 |
| 1451401_a_at | -0.117473098 | 6.541147345 | -1.348793826 | 0.208983555 | 0.208983555 | -4.836912707 |
| 1446803_at   | -0.122291648 | 5.904957829 | -1.348660102 | 0.209024966 | 0.209024966 | -4.837055406 |
| 1433427_at   | -0.118568358 | 4.166919562 | -1.348560699 | 0.209055753 | 0.209055753 | -4.837161476 |
| 1457767_at   | -0.113283161 | 4.458596303 | -1.348540436 | 0.20906203  | 0.20906203  | -4.837183097 |
| 1432426_a_at | 0.084119216  | 7.789843323 | 1.348516614  | 0.209069409 | 0.209069409 | -4.837208516 |
| 1431987_at   | 0.09343396   | 3.279056489 | 1.34851533   | 0.209069806 | 0.209069806 | -4.837209885 |
| 1442714_at   | 0.089165668  | 5.912336858 | 1.348497456  | 0.209075343 | 0.209075343 | -4.837228957 |
| 1424003_at   | 0.088482914  | 6.717762356 | 1.348277418  | 0.209143512 | 0.209143512 | -4.837463727 |
| 1432827_x_at | -0.278315413 | 12.57044205 | -1.348183301 | 0.209172676 | 0.209172676 | -4.837564139 |
| 1447987_at   | 0.164978406  | 6.206585044 | 1.348076572  | 0.209205753 | 0.209205753 | -4.837678    |
| 1457993_at   | -0.136818813 | 4.05728974  | -1.348029711 | 0.209220277 | 0.209220277 | -4.837727991 |
| 1418151_at   | 0.086569159  | 8.115141277 | 1.347996352  | 0.209230616 | 0.209230616 | -4.837763577 |
| 1446979_at   | -0.153330505 | 4.724244598 | -1.347941227 | 0.209247704 | 0.209247704 | -4.837822381 |
| 1428951_at   | 0.188753663  | 7.507759792 | 1.347832933  | 0.209281275 | 0.209281275 | -4.837937899 |
| 1432708_at   | -0.090928524 | 5.538849122 | -1.347814361 | 0.209287033 | 0.209287033 | -4.837957709 |
| 1419157_at   | 0.140606072  | 9.232715185 | 1.347598441  | 0.209353984 | 0.209353984 | -4.838188013 |
| 1456721_at   | 0.094358101  | 5.919482477 | 1.347566617  | 0.209363853 | 0.209363853 | -4.838221955 |
| 1437758_a_at | 0.099473602  | 7.580567479 | 1.347558924  | 0.209366239 | 0.209366239 | -4.838230159 |
| 1452360_a_at | 0.262371938  | 8.593773911 | 1.347496362  | 0.209385642 | 0.209385642 | -4.838296884 |
| 1436962_at   | -0.101585833 | 6.300763789 | -1.347484109 | 0.209389442 | 0.209389442 | -4.838309952 |
| 1432952_at   | -0.106084158 | 3.822826644 | -1.34740424  | 0.209414215 | 0.209414215 | -4.83839513  |
| 1441365_at   | -0.209861403 | 3.823330208 | -1.347398699 | 0.209415934 | 0.209415934 | -4.83840104  |
| 1421504_at   | 0.164541226  | 6.754462309 | 1.347345796  | 0.209432345 | 0.209432345 | -4.838457458 |
| 1454863_at   | 0.129022142  | 6.80235835  | 1.347111803  | 0.209504943 | 0.209504943 | -4.838706984 |
| 1451888_a_at | 0.135987249  | 8.343988521 | 1.347105011  | 0.20950705  | 0.20950705  | -4.838714226 |
| 1435736_x_at | 0.1734905    | 6.34772262  | 1.347094874  | 0.209510196 | 0.209510196 | -4.838725035 |
| 1444959_at   | -0.114428108 | 3.261529831 | -1.346942998 | 0.209557329 | 0.209557329 | -4.838886977 |
| 1426625_at   | 0.089809288  | 8.001640263 | 1.346941375  | 0.209557833 | 0.209557833 | -4.838888707 |

|              |              |             |              |             |             |              |
|--------------|--------------|-------------|--------------|-------------|-------------|--------------|
| 1424338_at   | -0.118075198 | 4.696899653 | -1.346835266 | 0.209590768 | 0.209590768 | -4.839001841 |
| 1437444_at   | -0.140784053 | 4.133454031 | -1.346740905 | 0.20962006  | 0.20962006  | -4.839102444 |
| 1446660_at   | 0.11765253   | 3.511240576 | 1.346736841  | 0.209621322 | 0.209621322 | -4.839106778 |
| 1450398_at   | -0.167882936 | 4.505946925 | -1.346728574 | 0.209623888 | 0.209623888 | -4.839115591 |
| 1437176_at   | 0.135062424  | 3.885261194 | 1.346707017  | 0.209630581 | 0.209630581 | -4.839138574 |
| 1429209_at   | 0.096410327  | 8.677003794 | 1.346681224  | 0.209638589 | 0.209638589 | -4.839166072 |
| 1452886_at   | 0.205132332  | 5.199313959 | 1.346669948  | 0.209642089 | 0.209642089 | -4.839178093 |
| 1422041_at   | 0.10437575   | 4.959864334 | 1.346662234  | 0.209644484 | 0.209644484 | -4.839186317 |
| 1455758_at   | -0.100881599 | 4.688607573 | -1.34663775  | 0.209652086 | 0.209652086 | -4.83921242  |
| 1434285_at   | 0.10693104   | 9.716906954 | 1.346448257  | 0.209710928 | 0.209710928 | -4.839414426 |
| 1426893_at   | -0.189577439 | 7.236512784 | -1.346319542 | 0.209750905 | 0.209750905 | -4.83955163  |
| 1460372_at   | 0.187373888  | 7.097270486 | 1.346197407  | 0.209788845 | 0.209788845 | -4.839681813 |
| 1440354_at   | -0.095138012 | 3.713049799 | -1.346167891 | 0.209798014 | 0.209798014 | -4.839713273 |
| 1426003_at   | 0.093004401  | 4.202977547 | 1.346113582  | 0.209814887 | 0.209814887 | -4.839771157 |
| 1421455_at   | -0.109839667 | 4.9965819   | -1.346014756 | 0.209845593 | 0.209845593 | -4.839876486 |
| 1430601_at   | 0.145738134  | 5.562216454 | 1.345914388  | 0.209876782 | 0.209876782 | -4.839983453 |
| 1440402_at   | 0.103807496  | 4.727329989 | 1.345897511  | 0.209882027 | 0.209882027 | -4.840001439 |
| 1446034_at   | 0.085268892  | 5.485302269 | 1.345751298  | 0.20992747  | 0.20992747  | -4.840157254 |
| 1432616_at   | -0.088974287 | 3.533732314 | -1.345720548 | 0.209937028 | 0.209937028 | -4.840190023 |
| 1459702_at   | 0.145591603  | 6.729648685 | 1.345690994  | 0.209946215 | 0.209946215 | -4.840221516 |
| 1431035_at   | 0.408865873  | 7.107735981 | 1.345662179  | 0.209955172 | 0.209955172 | -4.840252221 |
| 1442034_at   | 0.109640668  | 5.908978827 | 1.345649296  | 0.209959177 | 0.209959177 | -4.840265949 |
| 1418072_at   | -0.20450459  | 8.735046145 | -1.345562602 | 0.20998613  | 0.20998613  | -4.840358328 |
| 1449828_at   | 0.199666759  | 6.270301492 | 1.345557298  | 0.209987778 | 0.209987778 | -4.840363979 |
| 1418951_at   | -0.150218794 | 3.468349277 | -1.345502472 | 0.210004825 | 0.210004825 | -4.840422398 |
| 1453186_at   | -0.125564676 | 8.93213938  | -1.345407035 | 0.2100345   | 0.2100345   | -4.840524085 |
| 1448573_a_at | -0.082722905 | 3.290029782 | -1.345335526 | 0.210056738 | 0.210056738 | -4.840600275 |
| 1453426_a_at | -0.095575759 | 6.351857423 | -1.34532195  | 0.21006096  | 0.21006096  | -4.840614739 |
| 1439985_at   | -0.138011727 | 5.411746319 | -1.34532167  | 0.210061047 | 0.210061047 | -4.840615038 |
| 1426170_a_at | 0.115710028  | 4.009743129 | 1.345215853  | 0.210093958 | 0.210093958 | -4.840727775 |
| 1448715_x_at | 0.185978511  | 12.51378564 | 1.345174567  | 0.2101068   | 0.2101068   | -4.840771759 |
| 1429887_at   | -0.09997613  | 6.905144168 | -1.345007682 | 0.210158716 | 0.210158716 | -4.840949545 |
| 1431671_at   | 0.082220445  | 4.071628619 | 1.34491997   | 0.210186006 | 0.210186006 | -4.84104298  |
| 1432996_at   | -0.116076387 | 3.793483794 | -1.344885672 | 0.210196678 | 0.210196678 | -4.841079514 |
| 1424705_at   | 0.090542641  | 7.572315805 | 1.344782601  | 0.210228752 | 0.210228752 | -4.841189303 |
| 1447290_at   | 0.089741049  | 6.704329263 | 1.344734429  | 0.210243744 | 0.210243744 | -4.841240614 |
| 1435660_at   | -0.176238015 | 4.348587519 | -1.344707674 | 0.210252071 | 0.210252071 | -4.841269111 |
| 1455476_a_at | -0.166924224 | 9.079140395 | -1.344626929 | 0.210277203 | 0.210277203 | -4.841355113 |
| 1446864_at   | 0.084149584  | 3.256832189 | 1.344600473  | 0.210285439 | 0.210285439 | -4.841383291 |
| 1458549_at   | -0.098896526 | 3.678603614 | -1.344597346 | 0.210286412 | 0.210286412 | -4.841386621 |
| 1435784_at   | -0.233657851 | 7.321572886 | -1.344559141 | 0.210298304 | 0.210298304 | -4.841427312 |
| 1441314_at   | 0.147059071  | 3.894812946 | 1.344442432  | 0.210334638 | 0.210334638 | -4.841551609 |
| 1456979_at   | -0.138052541 | 6.150235934 | -1.344425896 | 0.210339786 | 0.210339786 | -4.841569219 |
| 1448817_at   | -0.112091645 | 7.4755018   | -1.344420368 | 0.210341507 | 0.210341507 | -4.841575107 |
| 1443380_at   | 0.145721965  | 4.745329981 | 1.344419507  | 0.210341775 | 0.210341775 | -4.841576023 |
| 1424839_a_at | -0.085097131 | 7.62614137  | -1.344397797 | 0.210348535 | 0.210348535 | -4.841599143 |
| 1447335_x_at | 0.17415558   | 6.75198183  | 1.344371398  | 0.210356755 | 0.210356755 | -4.841627258 |
| 1456257_at   | 0.088670001  | 7.628034398 | 1.344348922  | 0.210363753 | 0.210363753 | -4.841651193 |
| 1432677_at   | -0.13101306  | 3.938497471 | -1.344343682 | 0.210365384 | 0.210365384 | -4.841656774 |
| 1438322_x_at | 0.153727115  | 9.570271258 | 1.344334973  | 0.210368096 | 0.210368096 | -4.841666048 |
| 1433787_at   | -0.306135786 | 5.71483089  | -1.344274963 | 0.210386783 | 0.210386783 | -4.841729954 |
| 1431831_at   | 0.114220164  | 7.120277262 | 1.344256854  | 0.210392422 | 0.210392422 | -4.841749238 |
| 1432656_at   | -0.152388348 | 4.667248761 | -1.344168552 | 0.210419922 | 0.210419922 | -4.841843268 |

|              |              |             |              |             |             |              |
|--------------|--------------|-------------|--------------|-------------|-------------|--------------|
| 1454860_x_at | -0.093457135 | 10.16605593 | -1.343769882 | 0.210544116 | 0.210544116 | -4.842267753 |
| 1424686_at   | 0.118727284  | 7.990134855 | 1.343670775  | 0.210575    | 0.210575    | -4.842373266 |
| 1416958_at   | 0.120402309  | 8.07241466  | 1.343658995  | 0.210578671 | 0.210578671 | -4.842385806 |
| 1426846_at   | 0.098325114  | 8.829332125 | 1.3436432    | 0.210583594 | 0.210583594 | -4.842402621 |
| 1436613_at   | -0.119934659 | 4.306413124 | -1.343584893 | 0.210601766 | 0.210601766 | -4.842464694 |
| 1437483_at   | 0.097359365  | 6.971093523 | 1.34354302   | 0.210614817 | 0.210614817 | -4.84250927  |
| 1423022_at   | -0.177420689 | 4.939135226 | -1.343408084 | 0.210656878 | 0.210656878 | -4.842652909 |
| 1442712_at   | -0.118410359 | 3.98996153  | -1.343213273 | 0.210717616 | 0.210717616 | -4.84286027  |
| 1433091_at   | -0.14198753  | 3.841867028 | -1.343155852 | 0.210735521 | 0.210735521 | -4.842921387 |
| 1450192_at   | 0.134089372  | 3.50995408  | 1.343125268  | 0.210745059 | 0.210745059 | -4.842953939 |
| 1443883_at   | -0.160855356 | 5.396217173 | -1.343121895 | 0.210746111 | 0.210746111 | -4.842957529 |
| 1427005_at   | 0.086772047  | 9.437193522 | 1.342954595  | 0.210798289 | 0.210798289 | -4.843135584 |
| 1427639_a_at | 0.104463712  | 6.167553748 | 1.342925849  | 0.210807255 | 0.210807255 | -4.843166177 |
| 1443902_at   | 0.201124588  | 3.678424149 | 1.342802194  | 0.21084583  | 0.21084583  | -4.843297769 |
| 1419265_at   | -0.140370356 | 8.143015283 | -1.342800675 | 0.210846304 | 0.210846304 | -4.843299386 |
| 1423115_at   | -0.097011791 | 8.35623268  | -1.342772792 | 0.210855003 | 0.210855003 | -4.843329058 |
| 1448357_at   | 0.090632117  | 10.50540101 | 1.342769233  | 0.210856113 | 0.210856113 | -4.843332846 |
| 1437093_at   | -0.118990364 | 4.736404329 | -1.342759314 | 0.210859208 | 0.210859208 | -4.843343401 |
| 1417614_at   | -0.178208754 | 5.580909408 | -1.342717927 | 0.210872121 | 0.210872121 | -4.843387443 |
| 1447787_x_at | 0.145479108  | 9.836262428 | 1.342659316  | 0.210890408 | 0.210890408 | -4.843449811 |
| 1416586_at   | 0.097508659  | 7.042127322 | 1.342444342  | 0.210957496 | 0.210957496 | -4.843678553 |
| 1434253_s_at | -0.115756855 | 5.005798664 | -1.342319508 | 0.210996462 | 0.210996462 | -4.843811371 |
| 1453870_at   | 0.112941677  | 3.801020886 | 1.34225554   | 0.211016431 | 0.211016431 | -4.843879427 |
| 1449886_a_at | -0.115580366 | 7.117609105 | -1.342051307 | 0.211080198 | 0.211080198 | -4.844096699 |
| 1446019_at   | -0.089711343 | 4.389729872 | -1.342033193 | 0.211085855 | 0.211085855 | -4.844115968 |
| 1455842_x_at | -0.114822568 | 4.784024314 | -1.341945139 | 0.211113353 | 0.211113353 | -4.844209636 |
| 1430038_at   | 0.144741593  | 7.759395791 | 1.341894443  | 0.211129187 | 0.211129187 | -4.844263564 |
| 1459674_at   | -0.105051282 | 4.527477828 | -1.341805455 | 0.211156982 | 0.211156982 | -4.844358219 |
| 1425976_x_at | 0.082312014  | 2.951022243 | 1.341793216  | 0.211160805 | 0.211160805 | -4.844371238 |
| 1432472_a_at | -0.112051359 | 7.13683038  | -1.341574153 | 0.211229242 | 0.211229242 | -4.844604235 |
| 1449266_at   | 0.115636535  | 5.700262653 | 1.341560981  | 0.211233358 | 0.211233358 | -4.844618244 |
| 1429293_at   | 0.225131228  | 6.887041734 | 1.341518957  | 0.211246489 | 0.211246489 | -4.844662938 |
| 1425531_at   | -0.13886429  | 8.229393707 | -1.34151573  | 0.211247498 | 0.211247498 | -4.84466637  |
| 1434166_at   | 0.086655684  | 7.549606758 | 1.341462735  | 0.211264058 | 0.211264058 | -4.844722731 |
| 1440695_at   | 0.117170937  | 6.550209566 | 1.341453621  | 0.211266906 | 0.211266906 | -4.844732423 |
| 1425678_a_at | 0.111326912  | 8.600255897 | 1.341432557  | 0.211273489 | 0.211273489 | -4.844754824 |
| 1421553_at   | -0.16073834  | 5.113277238 | -1.341341801 | 0.211301852 | 0.211301852 | -4.84485134  |
| 1448303_at   | -0.094863371 | 5.043174194 | -1.341174484 | 0.211354152 | 0.211354152 | -4.845029264 |
| 1420193_at   | 0.089617557  | 3.708150695 | 1.340813512  | 0.21146702  | 0.21146702  | -4.845413072 |
| 1450866_a_at | -0.095181032 | 10.06203628 | -1.340766137 | 0.211481837 | 0.211481837 | -4.845463439 |
| 1455246_at   | -0.185973695 | 8.918668606 | -1.340701427 | 0.211502077 | 0.211502077 | -4.845532235 |
| 1425464_at   | -0.189857676 | 4.770208085 | -1.340627365 | 0.211525245 | 0.211525245 | -4.84561097  |
| 1448928_at   | 0.112306637  | 9.455792237 | 1.340470081  | 0.211574451 | 0.211574451 | -4.845778169 |
| 1432401_a_at | 0.134549283  | 4.901687813 | 1.340439042  | 0.211584163 | 0.211584163 | -4.845811163 |
| 1435612_at   | 0.162920804  | 4.609841452 | 1.340418049  | 0.211590732 | 0.211590732 | -4.845833479 |
| 1455684_at   | -0.105655291 | 6.118339244 | -1.340198062 | 0.211659576 | 0.211659576 | -4.846067307 |
| 1445120_at   | 0.117001121  | 3.430548943 | 1.340152106  | 0.21167396  | 0.21167396  | -4.846116152 |
| 1451152_a_at | -0.104259438 | 8.217651075 | -1.339906921 | 0.211750717 | 0.211750717 | -4.846376729 |
| 1444425_at   | 0.111188461  | 4.581282633 | 1.339863509  | 0.211764309 | 0.211764309 | -4.846422863 |
| 1421496_at   | 0.120185007  | 3.711054581 | 1.33980028   | 0.211784109 | 0.211784109 | -4.846490055 |
| 1438470_at   | 0.228749167  | 6.293407297 | 1.339759853  | 0.211796768 | 0.211796768 | -4.846533015 |
| 1455199_at   | -0.118659864 | 6.68532388  | -1.339707351 | 0.21181321  | 0.21181321  | -4.846588805 |
| 1449369_at   | -0.118695674 | 4.791542461 | -1.339699943 | 0.211815531 | 0.211815531 | -4.846596678 |

|              |              |             |              |             |             |              |
|--------------|--------------|-------------|--------------|-------------|-------------|--------------|
| 1441254_at   | -0.146868842 | 6.986875506 | -1.33969638  | 0.211816646 | 0.211816646 | -4.846600463 |
| 1433266_at   | -0.109574243 | 7.864111759 | -1.339618776 | 0.211840952 | 0.211840952 | -4.846682925 |
| 1437916_at   | 0.089091021  | 6.973477702 | 1.339486518  | 0.211882381 | 0.211882381 | -4.846823454 |
| 1454950_at   | -0.130144858 | 6.252921572 | -1.339483437 | 0.211883346 | 0.211883346 | -4.846826728 |
| 1422873_at   | 0.137580183  | 3.807306432 | 1.339302426  | 0.211940057 | 0.211940057 | -4.847019044 |
| 1456061_at   | 0.162319879  | 6.451460364 | 1.339298983  | 0.211941136 | 0.211941136 | -4.847022702 |
| 1452109_at   | -0.099849764 | 7.967268191 | -1.339277485 | 0.211947872 | 0.211947872 | -4.847045542 |
| 1428856_at   | 0.132462972  | 5.125676712 | 1.339206565  | 0.211970096 | 0.211970096 | -4.847120887 |
| 1437866_at   | -0.095259726 | 7.313959655 | -1.339188842 | 0.21197565  | 0.21197565  | -4.847139715 |
| 1449613_at   | -0.091134784 | 4.279487098 | -1.339137604 | 0.211991708 | 0.211991708 | -4.847194147 |
| 1419134_at   | 0.098753107  | 5.473195439 | 1.339133178  | 0.211993095 | 0.211993095 | -4.847198849 |
| 1460298_at   | -0.125629405 | 4.734154924 | -1.33898805  | 0.212038583 | 0.212038583 | -4.847353018 |
| 1432575_at   | -0.136616049 | 4.221085563 | -1.338913161 | 0.212062059 | 0.212062059 | -4.847432568 |
| 1430709_at   | -0.120729306 | 3.689918147 | -1.338678045 | 0.212135776 | 0.212135776 | -4.847682298 |
| 1436793_at   | -0.116976016 | 3.79690494  | -1.338660728 | 0.212141206 | 0.212141206 | -4.84770069  |
| 1442207_at   | 0.153497652  | 4.319720746 | 1.338639749  | 0.212147785 | 0.212147785 | -4.847722972 |
| 1456539_at   | 0.109000952  | 5.06913012  | 1.338611489  | 0.212156648 | 0.212156648 | -4.847752987 |
| 1445612_at   | -0.187508099 | 6.556933828 | -1.338563947 | 0.212171558 | 0.212171558 | -4.847803478 |
| 1445688_at   | 0.108972825  | 6.150764969 | 1.33854761   | 0.212176681 | 0.212176681 | -4.847820829 |
| 1419825_at   | -0.108634721 | 4.286375587 | -1.338512419 | 0.212187719 | 0.212187719 | -4.847858203 |
| 1429592_at   | 0.106895289  | 3.389682158 | 1.338506044  | 0.212189718 | 0.212189718 | -4.847864974 |
| 1431414_at   | -0.102712902 | 3.729791608 | -1.338489009 | 0.212195061 | 0.212195061 | -4.847883065 |
| 1442147_at   | -0.153088414 | 5.182622528 | -1.338468645 | 0.212201449 | 0.212201449 | -4.847904691 |
| 1444558_at   | -0.119214697 | 3.80067234  | -1.33838605  | 0.212227357 | 0.212227357 | -4.847992405 |
| 1445117_at   | 0.151511264  | 3.689542071 | 1.338361079  | 0.212235191 | 0.212235191 | -4.848018923 |
| 1417477_at   | 0.109972909  | 9.093570536 | 1.338220751  | 0.212279216 | 0.212279216 | -4.848167938 |
| 1438718_at   | 0.097719431  | 5.922972264 | 1.3381457    | 0.212302765 | 0.212302765 | -4.848247632 |
| 1435008_at   | 0.116036689  | 8.949940559 | 1.33801635   | 0.212343357 | 0.212343357 | -4.848384975 |
| 1448628_at   | 0.265160946  | 6.518902253 | 1.337892912  | 0.2123821   | 0.2123821   | -4.848516035 |
| 1430756_at   | 0.105642565  | 4.799122396 | 1.337885267  | 0.2123845   | 0.2123845   | -4.84852415  |
| 1447354_at   | 0.117910976  | 3.291005425 | 1.337858558  | 0.212392884 | 0.212392884 | -4.848552508 |
| 1440984_at   | 0.177711154  | 7.028336988 | 1.337827961  | 0.212402488 | 0.212402488 | -4.848584991 |
| 1431250_at   | -0.116170601 | 6.02433142  | -1.337803603 | 0.212410135 | 0.212410135 | -4.848610852 |
| 1447125_at   | -0.085924813 | 5.436132889 | -1.337660156 | 0.21245517  | 0.21245517  | -4.848763139 |
| 1423104_at   | -0.098204347 | 11.2273773  | -1.33765465  | 0.212456899 | 0.212456899 | -4.848768984 |
| 1439220_at   | -0.103602343 | 5.81282157  | -1.337607287 | 0.212471771 | 0.212471771 | -4.848819264 |
| 1429404_at   | 0.120067526  | 5.857476295 | 1.337599304  | 0.212474277 | 0.212474277 | -4.848827737 |
| 1420616_at   | 0.082001792  | 9.836300897 | 1.337558871  | 0.212486974 | 0.212486974 | -4.84887066  |
| 1434799_x_at | -0.139361275 | 10.85910409 | -1.337549127 | 0.212490034 | 0.212490034 | -4.848881004 |
| 1449563_at   | 0.235366641  | 7.151291704 | 1.337485556  | 0.212509997 | 0.212509997 | -4.848948485 |
| 1453549_at   | -0.104694023 | 4.593970427 | -1.337398688 | 0.212537279 | 0.212537279 | -4.849040694 |
| 1441293_at   | 0.15984802   | 4.811184433 | 1.337381022  | 0.212542828 | 0.212542828 | -4.849059445 |
| 1456616_a_at | -0.093807753 | 11.18400798 | -1.337359138 | 0.212549701 | 0.212549701 | -4.849082674 |
| 1453289_at   | 0.111245999  | 7.239722529 | 1.337286883  | 0.212572398 | 0.212572398 | -4.849159367 |
| 1446793_at   | 0.097002355  | 4.253288575 | 1.337239219  | 0.21258737  | 0.21258737  | -4.849209956 |
| 1452963_at   | 0.143830963  | 5.120329668 | 1.337200753  | 0.212599455 | 0.212599455 | -4.849250784 |
| 1434525_at   | -0.094963264 | 7.422170443 | -1.337191526 | 0.212602353 | 0.212602353 | -4.849260576 |
| 1433396_at   | -0.136576635 | 4.681211702 | -1.337167461 | 0.212609914 | 0.212609914 | -4.849286118 |
| 1437556_at   | -0.090597429 | 10.03348922 | -1.337146263 | 0.212616574 | 0.212616574 | -4.849308616 |
| 1460677_at   | -0.092412867 | 9.106333217 | -1.337122861 | 0.212623926 | 0.212623926 | -4.849333453 |
| 1424595_at   | 0.112632299  | 9.348378633 | 1.33692268   | 0.212686829 | 0.212686829 | -4.849545898 |
| 1458417_at   | 0.121541858  | 5.659562423 | 1.336906707  | 0.212691849 | 0.212691849 | -4.84956285  |
| 1429908_at   | 0.086738904  | 6.530986416 | 1.336770853  | 0.212734548 | 0.212734548 | -4.849707015 |

|              |              |             |              |             |             |              |
|--------------|--------------|-------------|--------------|-------------|-------------|--------------|
| 1449639_at   | -0.082910367 | 5.004523657 | -1.336693866 | 0.212758748 | 0.212758748 | -4.849788707 |
| 1425213_at   | -0.122705361 | 7.85971286  | -1.336692385 | 0.212759213 | 0.212759213 | -4.849790279 |
| 1459741_x_at | 0.090638569  | 8.03902303  | 1.336616915  | 0.212782939 | 0.212782939 | -4.849870359 |
| 1445081_at   | 0.420269673  | 6.891026273 | 1.336559372  | 0.212801031 | 0.212801031 | -4.849931415 |
| 1439994_at   | -0.17433076  | 5.430978381 | -1.336477326 | 0.212826828 | 0.212826828 | -4.850018466 |
| 1430046_at   | -0.123718003 | 5.602639278 | -1.336399283 | 0.212851369 | 0.212851369 | -4.850101269 |
| 1449702_at   | 0.118905976  | 7.629286077 | 1.336317613  | 0.212877053 | 0.212877053 | -4.850187915 |
| 1431639_at   | 0.113834414  | 3.470653965 | 1.336292958  | 0.212884807 | 0.212884807 | -4.850214072 |
| 1442415_at   | -0.12375671  | 5.70093394  | -1.33626647  | 0.212893138 | 0.212893138 | -4.850242173 |
| 1422199_at   | -0.109684422 | 5.263773124 | -1.33626325  | 0.212894151 | 0.212894151 | -4.850245589 |
| 1458536_at   | 0.157044551  | 4.256935306 | 1.336033575  | 0.2129664   | 0.2129664   | -4.850489235 |
| 1428493_at   | 0.114526938  | 8.014625337 | 1.335951825  | 0.212992121 | 0.212992121 | -4.850575951 |
| 1418807_at   | 0.199103508  | 3.687447923 | 1.335945665  | 0.212994059 | 0.212994059 | -4.850582485 |
| 1442115_at   | 0.176275922  | 6.140956138 | 1.33559651   | 0.213103945 | 0.213103945 | -4.850952813 |
| 1420113_s_at | 0.098407318  | 7.969841157 | 1.335424207  | 0.213158189 | 0.213158189 | -4.851135541 |
| 1417705_at   | -0.110165461 | 6.95724192  | -1.335406367 | 0.213163806 | 0.213163806 | -4.851154459 |
| 1454187_at   | 0.11769026   | 3.951780941 | 1.335291574  | 0.213199952 | 0.213199952 | -4.851276189 |
| 1425471_x_at | -0.139753454 | 4.642165814 | -1.335132319 | 0.213250107 | 0.213250107 | -4.851445056 |
| 1427482_a_at | -0.236256387 | 5.791688159 | -1.335099474 | 0.213260453 | 0.213260453 | -4.851479882 |
| 1451078_at   | 0.140010462  | 7.710664995 | 1.335097476  | 0.213261082 | 0.213261082 | -4.851482    |
| 1452107_s_at | 0.161106188  | 9.841576407 | 1.33505583   | 0.2132742   | 0.2132742   | -4.851526157 |
| 1460149_at   | 0.128292967  | 3.744462719 | 1.334970873  | 0.213300963 | 0.213300963 | -4.851616234 |
| 1438512_at   | -0.08205638  | 4.310715494 | -1.334937181 | 0.213311577 | 0.213311577 | -4.851651954 |
| 1450349_at   | -0.140948435 | 4.032524225 | -1.334901368 | 0.21332286  | 0.21332286  | -4.851689924 |
| 1453853_a_at | 0.143197853  | 6.156581504 | 1.334794102  | 0.213356657 | 0.213356657 | -4.851803645 |
| 1416887_at   | -0.091338369 | 3.886235003 | -1.334778183 | 0.213361673 | 0.213361673 | -4.851820521 |
| 1432024_at   | 0.121178592  | 4.609251861 | 1.334702134  | 0.213385638 | 0.213385638 | -4.851901142 |
| 1459415_at   | 0.118864711  | 4.163633031 | 1.33467397   | 0.213394514 | 0.213394514 | -4.851930999 |
| 1427619_a_at | 0.110367565  | 5.071738048 | 1.334643578  | 0.213404092 | 0.213404092 | -4.851963216 |
| 1444109_at   | -0.125855736 | 7.367092101 | -1.334483456 | 0.21345456  | 0.21345456  | -4.85213295  |
| 1456228_x_at | 0.275827319  | 4.338987337 | 1.334415974  | 0.213475833 | 0.213475833 | -4.852204479 |
| 1426551_at   | -0.097799214 | 3.66554982  | -1.334372679 | 0.213489482 | 0.213489482 | -4.85225037  |
| 1445175_at   | -0.118911061 | 4.728712515 | -1.33423356  | 0.213533345 | 0.213533345 | -4.852397821 |
| 1447101_at   | 0.18860166   | 6.383798195 | 1.334129504  | 0.213566158 | 0.213566158 | -4.852508105 |
| 1446822_at   | -0.109759792 | 5.45956771  | -1.334118591 | 0.2135696   | 0.2135696   | -4.85251967  |
| 1459736_at   | -0.120834704 | 4.120178544 | -1.334078831 | 0.213582139 | 0.213582139 | -4.852561808 |
| 1425948_a_at | 0.195922237  | 4.91430233  | 1.333976553  | 0.213614397 | 0.213614397 | -4.852670197 |
| 1432634_at   | -0.086022103 | 3.636584585 | -1.333942705 | 0.213625074 | 0.213625074 | -4.852706067 |
| 1443299_at   | -0.178241657 | 5.009881097 | -1.333662388 | 0.21371351  | 0.21371351  | -4.853003104 |
| 1432882_at   | 0.161442331  | 6.932339086 | 1.333601534  | 0.213732713 | 0.213732713 | -4.853067582 |
| 1424106_at   | 0.108300422  | 9.37810675  | 1.333595815  | 0.213734518 | 0.213734518 | -4.853073642 |
| 1442775_at   | -0.124815904 | 6.257577387 | -1.333383555 | 0.213801509 | 0.213801509 | -4.853298529 |
| 1458817_at   | -0.113174017 | 4.172427678 | -1.333274831 | 0.213835831 | 0.213835831 | -4.853413712 |
| 1460493_at   | -0.098285187 | 4.019287369 | -1.333260765 | 0.213840271 | 0.213840271 | -4.853428613 |
| 1431949_at   | -0.12135916  | 5.013213058 | -1.333178526 | 0.213866235 | 0.213866235 | -4.853515733 |
| 1429779_at   | 0.13046145   | 6.860943018 | 1.333085096  | 0.213895736 | 0.213895736 | -4.853614704 |
| 1436909_at   | 0.120670047  | 7.230657167 | 1.333081427  | 0.213896894 | 0.213896894 | -4.853618591 |
| 1424825_a_at | -0.07846678  | 3.944114156 | -1.332857042 | 0.213967758 | 0.213967758 | -4.853856265 |
| 1420713_a_at | -0.280396086 | 7.352600955 | -1.332732185 | 0.214007198 | 0.214007198 | -4.853988505 |
| 1425728_at   | -0.101698416 | 4.747019288 | -1.332723644 | 0.214009896 | 0.214009896 | -4.853997551 |
| 1456281_at   | 0.160540255  | 5.589764363 | 1.332627544  | 0.214040257 | 0.214040257 | -4.854099329 |
| 1442812_at   | 0.151407125  | 3.56768524  | 1.332341175  | 0.214130751 | 0.214130751 | -4.854402588 |
| 1455377_at   | 0.141412232  | 4.635182748 | 1.332313037  | 0.214139645 | 0.214139645 | -4.854432383 |

|              |              |             |              |             |             |              |
|--------------|--------------|-------------|--------------|-------------|-------------|--------------|
| 1431310_s_at | -0.108320975 | 3.669644933 | -1.332234002 | 0.214164626 | 0.214164626 | -4.854516071 |
| 1419927_s_at | 0.084473948  | 8.689962667 | 1.332188544  | 0.214178996 | 0.214178996 | -4.854564204 |
| 1451782_a_at | -0.110365191 | 7.923422209 | -1.332122527 | 0.214199866 | 0.214199866 | -4.854634103 |
| 1447246_at   | -0.113153323 | 5.743166255 | -1.332046355 | 0.214223949 | 0.214223949 | -4.854714753 |
| 1420184_at   | -0.092970254 | 4.247704358 | -1.332027019 | 0.214230063 | 0.214230063 | -4.854735225 |
| 1432120_at   | 0.142894435  | 4.321562141 | 1.331887961  | 0.214274034 | 0.214274034 | -4.854882448 |
| 1448448_a_at | -0.088960997 | 8.576848881 | -1.331872328 | 0.214278978 | 0.214278978 | -4.854898998 |
| 1459081_at   | 0.101547501  | 3.631185159 | 1.33178843   | 0.214305511 | 0.214305511 | -4.854987816 |
| 1435332_at   | 0.085281989  | 4.79165904  | 1.331753772  | 0.214316473 | 0.214316473 | -4.855024506 |
| 1422489_at   | -0.12730693  | 9.549787881 | -1.3316693   | 0.214343192 | 0.214343192 | -4.855113928 |
| 1434505_a_at | -0.163171769 | 4.708553161 | -1.331626048 | 0.214356874 | 0.214356874 | -4.855159712 |
| 1460491_at   | 0.132491448  | 4.375262313 | 1.331599514  | 0.214365268 | 0.214365268 | -4.855187799 |
| 1460378_a_at | 0.100396524  | 8.882201256 | 1.331289052  | 0.214463502 | 0.214463502 | -4.85551641  |
| 1447653_x_at | -0.109948346 | 7.332005176 | -1.331241094 | 0.21447868  | 0.21447868  | -4.855567166 |
| 1457536_at   | -0.09013827  | 3.686081276 | -1.331239262 | 0.21447926  | 0.21447926  | -4.855569106 |
| 1460523_at   | -0.122962858 | 6.255439351 | -1.331224532 | 0.214483921 | 0.214483921 | -4.855584694 |
| 1441933_x_at | -0.118890864 | 6.170652628 | -1.33119517  | 0.214493215 | 0.214493215 | -4.85561577  |
| 1445298_at   | -0.112759506 | 5.358771011 | -1.331183495 | 0.21449691  | 0.21449691  | -4.855628126 |
| 1459894_at   | 0.117839828  | 8.450989346 | 1.331156976  | 0.214505304 | 0.214505304 | -4.855656191 |
| 1421164_a_at | -0.132563494 | 8.859312357 | -1.331131339 | 0.214513419 | 0.214513419 | -4.855683322 |
| 1433755_at   | 0.093202633  | 9.287824221 | 1.331096603  | 0.214524414 | 0.214524414 | -4.855720083 |
| 1450199_a_at | -0.163353982 | 7.779640582 | -1.331024744 | 0.214547162 | 0.214547162 | -4.855796129 |
| 1435938_at   | -0.09936563  | 8.262447078 | -1.330974988 | 0.214562914 | 0.214562914 | -4.855848782 |
| 1455203_at   | -0.163934007 | 4.240175539 | -1.33095971  | 0.214567751 | 0.214567751 | -4.855864949 |
| 1455378_at   | -0.101799601 | 3.923275325 | -1.330867197 | 0.214597042 | 0.214597042 | -4.855962845 |
| 1436178_at   | -0.104265335 | 7.548259027 | -1.330765162 | 0.214629353 | 0.214629353 | -4.856070812 |
| 1460663_at   | -0.110534819 | 5.139488213 | -1.330709437 | 0.214647    | 0.214647    | -4.856129775 |
| 1415939_at   | -0.166813697 | 8.443479845 | -1.330507736 | 0.214710887 | 0.214710887 | -4.856343181 |
| 1444044_at   | 0.382449627  | 7.14666437  | 1.330221054  | 0.214801718 | 0.214801718 | -4.856646464 |
| 1418436_at   | 0.08704808   | 9.378956343 | 1.330157112  | 0.214821981 | 0.214821981 | -4.856714102 |
| 1449816_at   | 0.152739185  | 7.466801394 | 1.330079993  | 0.214846423 | 0.214846423 | -4.856795678 |
| 1458904_at   | -0.082317675 | 5.022622977 | -1.329946287 | 0.214888804 | 0.214888804 | -4.856937103 |
| 1419551_s_at | -0.134059431 | 7.71918192  | -1.329932959 | 0.214893029 | 0.214893029 | -4.8569512   |
| 1433684_at   | -0.098290195 | 8.728582744 | -1.329923426 | 0.214896051 | 0.214896051 | -4.856961282 |
| 1422323_a_at | -0.089743265 | 5.296029179 | -1.329893819 | 0.214905437 | 0.214905437 | -4.856992597 |
| 1449128_at   | 0.168882684  | 5.969994528 | 1.329829089  | 0.214925958 | 0.214925958 | -4.857061059 |
| 1427865_at   | -0.181339807 | 5.149606934 | -1.329799292 | 0.214935405 | 0.214935405 | -4.857092573 |
| 1420531_at   | -0.130785468 | 3.962057676 | -1.329737035 | 0.214955145 | 0.214955145 | -4.857158417 |
| 1424099_at   | -0.113979719 | 10.29719579 | -1.329656971 | 0.214980533 | 0.214980533 | -4.85724309  |
| 1440401_at   | 0.08666724   | 3.673634207 | 1.329609966  | 0.21499544  | 0.21499544  | -4.8572928   |
| 1424337_at   | 0.127873672  | 7.561074954 | 1.329582899  | 0.215004024 | 0.215004024 | -4.857321423 |
| 1421408_at   | 0.105135005  | 4.348043516 | 1.329529534  | 0.215020948 | 0.215020948 | -4.857377856 |
| 1446359_at   | -0.136682518 | 4.646569703 | -1.329487212 | 0.215034372 | 0.215034372 | -4.857422611 |
| 1436685_at   | -0.162918196 | 4.640082776 | -1.329473627 | 0.215038681 | 0.215038681 | -4.857436977 |
| 1417558_at   | -0.138894309 | 9.595563503 | -1.329345872 | 0.215079206 | 0.215079206 | -4.857572068 |
| 1420638_at   | 0.087527049  | 5.847879811 | 1.329287281  | 0.215097794 | 0.215097794 | -4.85763402  |
| 1446601_at   | -0.112515556 | 4.245014473 | -1.329275354 | 0.215101578 | 0.215101578 | -4.857646631 |
| 1435855_x_at | -0.086912093 | 9.28911158  | -1.329265966 | 0.215104556 | 0.215104556 | -4.857656558 |
| 1435605_at   | -0.272646187 | 6.765653137 | -1.329164616 | 0.215136713 | 0.215136713 | -4.857763718 |
| 1452459_at   | -0.115169595 | 7.409960335 | -1.329117832 | 0.215151559 | 0.215151559 | -4.857813182 |
| 1418970_a_at | 0.084184233  | 8.515960412 | 1.329075944  | 0.215164851 | 0.215164851 | -4.857857469 |
| 1445096_at   | -0.090158935 | 4.018493361 | -1.328918455 | 0.215214834 | 0.215214834 | -4.858023969 |
| 1442271_at   | -0.144621967 | 7.558695741 | -1.328772243 | 0.215261246 | 0.215261246 | -4.858178534 |

|              |              |             |              |             |             |              |
|--------------|--------------|-------------|--------------|-------------|-------------|--------------|
| 1453438_x_at | 0.085301651  | 3.653274959 | 1.328716156  | 0.215279052 | 0.215279052 | -4.858237824 |
| 1449050_at   | -0.081538969 | 9.021755897 | -1.328673375 | 0.215292635 | 0.215292635 | -4.858283046 |
| 1457670_s_at | -0.095483204 | 8.684612311 | -1.328486553 | 0.215351957 | 0.215351957 | -4.858480517 |
| 1457625_s_at | -0.143851466 | 4.480433079 | -1.328388176 | 0.215383201 | 0.215383201 | -4.858584495 |
| 1438815_at   | -0.180849952 | 4.610759051 | -1.328229907 | 0.215433474 | 0.215433474 | -4.858751763 |
| 1419582_at   | -0.104674702 | 3.78155914  | -1.328138053 | 0.215462655 | 0.215462655 | -4.858848835 |
| 1418630_at   | -0.138607007 | 5.625238706 | -1.328059255 | 0.215487691 | 0.215487691 | -4.858932105 |
| 1438624_x_at | 0.13493542   | 4.216116014 | 1.327833187  | 0.215559532 | 0.215559532 | -4.859170987 |
| 1431228_s_at | 0.090268149  | 7.901269059 | 1.327782677  | 0.215575586 | 0.215575586 | -4.859224357 |
| 1426736_at   | -0.084703396 | 9.883089159 | -1.327713811 | 0.215597476 | 0.215597476 | -4.859297119 |
| 1433423_at   | -0.144595834 | 4.897050883 | -1.327672026 | 0.215610759 | 0.215610759 | -4.859341267 |
| 1440743_at   | -0.094255957 | 5.885128516 | -1.327610606 | 0.215630285 | 0.215630285 | -4.859406159 |
| 1435818_at   | -0.105411825 | 6.767439001 | -1.327547006 | 0.215650505 | 0.215650505 | -4.859473352 |
| 1445537_at   | -0.134358782 | 5.569260847 | -1.32746789  | 0.215675661 | 0.215675661 | -4.859556935 |
| 1441636_at   | -0.094789629 | 3.962749904 | -1.32742954  | 0.215687855 | 0.215687855 | -4.859597449 |
| 1445110_at   | -0.109703538 | 4.607984536 | -1.327410744 | 0.215693832 | 0.215693832 | -4.859617305 |
| 1426441_at   | -0.112057803 | 6.613304428 | -1.327405119 | 0.215695621 | 0.215695621 | -4.859623248 |
| 1454704_at   | 0.101202546  | 9.860348844 | 1.327376956  | 0.215704577 | 0.215704577 | -4.859652999 |
| 1442278_at   | 0.223861986  | 7.43148639  | 1.327343643  | 0.215715171 | 0.215715171 | -4.85968819  |
| 1460652_at   | -0.0903924   | 6.794590293 | -1.327334205 | 0.215718173 | 0.215718173 | -4.85969816  |
| 1427490_at   | 0.125999339  | 5.822900056 | 1.327318861  | 0.215723052 | 0.215723052 | -4.859714369 |
| 1439754_at   | -0.08337571  | 7.689567275 | -1.327266206 | 0.215739799 | 0.215739799 | -4.859769991 |
| 1450855_at   | 0.093989663  | 6.010704706 | 1.327144845  | 0.215778401 | 0.215778401 | -4.859898185 |
| 1420196_s_at | 0.130956051  | 9.554003258 | 1.327117355  | 0.215787146 | 0.215787146 | -4.859927222 |
| 1434103_at   | -0.102908756 | 8.291294705 | -1.327079669 | 0.215799134 | 0.215799134 | -4.859967028 |
| 1439548_at   | -0.09074753  | 5.73933991  | -1.326983904 | 0.215829601 | 0.215829601 | -4.860068177 |
| 1418845_at   | -0.09842411  | 4.805699772 | -1.32674219  | 0.215906518 | 0.215906518 | -4.860323459 |
| 1423749_s_at | -0.161950352 | 7.636194352 | -1.326694889 | 0.215921572 | 0.215921572 | -4.860373411 |
| 1459740_s_at | 0.12674891   | 7.127928796 | 1.326649117  | 0.215936141 | 0.215936141 | -4.860421748 |
| 1425513_at   | 0.111752902  | 6.230817345 | 1.326640108  | 0.215939008 | 0.215939008 | -4.860431262 |
| 1423852_at   | 0.35026105   | 7.29508464  | 1.32650578   | 0.215981768 | 0.215981768 | -4.86057311  |
| 1448423_at   | -0.098069885 | 3.344750592 | -1.326333853 | 0.216036507 | 0.216036507 | -4.860754648 |
| 1440267_at   | -0.17845815  | 6.646663455 | -1.326286292 | 0.216051652 | 0.216051652 | -4.860804865 |
| 1432312_a_at | -0.124119039 | 4.809513901 | -1.326261837 | 0.216059439 | 0.216059439 | -4.860830686 |
| 1441925_at   | -0.097885733 | 3.705878024 | -1.326214593 | 0.216074485 | 0.216074485 | -4.860880567 |
| 1444734_at   | -0.155286386 | 4.777512767 | -1.326162185 | 0.216091175 | 0.216091175 | -4.860935898 |
| 1417749_a_at | 0.112819062  | 9.974750343 | 1.326141202  | 0.216097858 | 0.216097858 | -4.860958052 |
| 1431445_at   | -0.087013342 | 3.109656523 | -1.325955975 | 0.216156859 | 0.216156859 | -4.861153599 |
| 1422867_at   | 0.109940721  | 3.293297419 | 1.325951464  | 0.216158296 | 0.216158296 | -4.861158361 |
| 1439682_at   | 0.105548159  | 3.738489723 | 1.325853687  | 0.216189447 | 0.216189447 | -4.861261578 |
| 1436548_at   | 0.110851596  | 5.592403118 | 1.32583332   | 0.216195936 | 0.216195936 | -4.861283078 |
| 1456335_at   | 0.158776062  | 7.192536858 | 1.32581536   | 0.216201658 | 0.216201658 | -4.861302037 |
| 1429604_at   | 0.086168571  | 3.940283676 | 1.325797749  | 0.21620727  | 0.21620727  | -4.861320627 |
| 1421439_at   | 0.105376889  | 3.578914044 | 1.325796309  | 0.216207728 | 0.216207728 | -4.861322147 |
| 1428660_s_at | 0.107820505  | 5.444446758 | 1.325687584  | 0.216242374 | 0.216242374 | -4.861436913 |
| 1440761_at   | 0.137260043  | 3.380116436 | 1.325555301  | 0.216284532 | 0.216284532 | -4.861576537 |
| 1426438_at   | 2.190338344  | 6.116336064 | 1.325516998  | 0.216296741 | 0.216296741 | -4.861616964 |
| 1445807_at   | -0.357143968 | 6.36919617  | -1.325491466 | 0.216304879 | 0.216304879 | -4.861643911 |
| 1428071_at   | 0.124900684  | 8.498991367 | 1.325487283  | 0.216306213 | 0.216306213 | -4.861648327 |
| 1425374_at   | -0.081346908 | 4.227072346 | -1.325445063 | 0.216319671 | 0.216319671 | -4.861692887 |
| 1445396_at   | -0.098971845 | 3.25799348  | -1.325427655 | 0.21632522  | 0.21632522  | -4.861711259 |
| 1457309_at   | 0.107464082  | 3.647740297 | 1.325357225  | 0.216347672 | 0.216347672 | -4.86178559  |
| 1440476_at   | -0.139674259 | 4.486533134 | -1.325235913 | 0.21638635  | 0.21638635  | -4.861913615 |

|              |              |             |              |             |             |              |
|--------------|--------------|-------------|--------------|-------------|-------------|--------------|
| 1457957_at   | -0.121093723 | 4.243204804 | -1.325233671 | 0.216387065 | 0.216387065 | -4.86191598  |
| 1442406_at   | -0.192792221 | 6.783556127 | -1.325185297 | 0.21640249  | 0.21640249  | -4.861967029 |
| 1415695_at   | 0.085118593  | 10.53947406 | 1.325182015  | 0.216403536 | 0.216403536 | -4.861970493 |
| 1441299_at   | -0.09877353  | 3.465450041 | -1.325103338 | 0.216428625 | 0.216428625 | -4.862053517 |
| 1439119_a_at | -0.133782841 | 6.358279115 | -1.325078243 | 0.216436628 | 0.216436628 | -4.862079998 |
| 1437429_at   | -0.142052532 | 7.401934857 | -1.325075825 | 0.216437399 | 0.216437399 | -4.862082549 |
| 1417115_at   | 0.096141839  | 8.305868322 | 1.325070467  | 0.216439108 | 0.216439108 | -4.862088203 |
| 1425232_x_at | -0.109859386 | 3.610445244 | -1.325040015 | 0.21644882  | 0.21644882  | -4.862120336 |
| 1451718_at   | 0.186404929  | 7.280464337 | 1.324896475  | 0.216494603 | 0.216494603 | -4.862271796 |
| 1458403_at   | -0.106496121 | 3.628580459 | -1.324811718 | 0.216521641 | 0.216521641 | -4.862361223 |
| 1440452_at   | -0.083895278 | 7.594133296 | -1.324807194 | 0.216523084 | 0.216523084 | -4.862365997 |
| 1438874_at   | -0.083640163 | 3.586053151 | -1.324701634 | 0.216556762 | 0.216556762 | -4.862477368 |
| 1430575_a_at | 0.128433495  | 7.240944707 | 1.324642405  | 0.21657566  | 0.21657566  | -4.862539855 |
| 1419458_at   | 0.090310033  | 6.736383123 | 1.324616902  | 0.216583798 | 0.216583798 | -4.862566761 |
| 1431580_at   | 0.091255362  | 3.952803355 | 1.324605949  | 0.216587293 | 0.216587293 | -4.862578316 |
| 1428832_at   | 0.088240154  | 6.884143566 | 1.324572937  | 0.216597828 | 0.216597828 | -4.862613143 |
| 1425370_a_at | 0.133775731  | 6.076499739 | 1.324502201  | 0.216620401 | 0.216620401 | -4.862687766 |
| 1451959_a_at | 0.165490656  | 7.451891754 | 1.324489573  | 0.216624432 | 0.216624432 | -4.862701088 |
| 1428806_at   | 0.106543801  | 8.449059931 | 1.324343119  | 0.216671176 | 0.216671176 | -4.86285558  |
| 1458027_at   | -0.153685597 | 4.311839984 | -1.324252158 | 0.216700213 | 0.216700213 | -4.862951528 |
| 1460580_at   | 0.116966295  | 7.955825783 | 1.32422504   | 0.21670887  | 0.21670887  | -4.862980131 |
| 1457294_at   | 0.150644473  | 6.967051585 | 1.324215463  | 0.216711927 | 0.216711927 | -4.862990233 |
| 1441392_at   | -0.10601846  | 3.655981566 | -1.324160206 | 0.216729569 | 0.216729569 | -4.863048516 |
| 1456831_at   | -0.147698389 | 6.600760514 | -1.324093237 | 0.216750951 | 0.216750951 | -4.863119151 |
| 1438801_at   | -0.129632101 | 4.405201131 | -1.324087648 | 0.216752736 | 0.216752736 | -4.863125047 |
| 1453809_at   | -0.104529811 | 4.284317095 | -1.324044227 | 0.216766601 | 0.216766601 | -4.863170843 |
| 1423579_a_at | -0.085482149 | 3.670696608 | -1.323966028 | 0.216791573 | 0.216791573 | -4.863253317 |
| 1448432_at   | -0.115829932 | 8.429420075 | -1.323961    | 0.216793179 | 0.216793179 | -4.86325862  |
| 1424842_a_at | 0.10152987   | 8.306607789 | 1.323926454  | 0.216804211 | 0.216804211 | -4.863295054 |
| 1429359_s_at | 0.129660315  | 5.906179979 | 1.323909352  | 0.216809673 | 0.216809673 | -4.86331309  |
| 1459354_at   | -0.117214062 | 5.902096503 | -1.323756183 | 0.216858596 | 0.216858596 | -4.863474621 |
| 1440821_x_at | -0.12436717  | 3.276409939 | -1.323732341 | 0.216866212 | 0.216866212 | -4.863499762 |
| 1460157_at   | 0.102414082  | 3.272051693 | 1.323675188  | 0.21688447  | 0.21688447  | -4.863560032 |
| 1450086_at   | 0.100680041  | 7.504801899 | 1.323588234  | 0.21691225  | 0.21691225  | -4.863651723 |
| 1455287_at   | 0.094853543  | 9.103201413 | 1.323537968  | 0.216928311 | 0.216928311 | -4.863704727 |
| 1432821_at   | -0.133581417 | 5.239038755 | -1.32350728  | 0.216938116 | 0.216938116 | -4.863737085 |
| 1431070_a_at | -0.110333664 | 7.792598793 | -1.323496655 | 0.216941512 | 0.216941512 | -4.863748288 |
| 1417476_at   | -0.090564333 | 7.52599701  | -1.323468145 | 0.216950622 | 0.216950622 | -4.86377835  |
| 1456429_at   | 0.107509454  | 6.767361329 | 1.323443719  | 0.216958427 | 0.216958427 | -4.863804104 |
| 1419402_at   | -0.23374516  | 7.460974573 | -1.323425264 | 0.216964325 | 0.216964325 | -4.863823563 |
| 1429022_at   | 0.286085401  | 5.844493013 | 1.323351419  | 0.216987924 | 0.216987924 | -4.863901422 |
| 1420641_a_at | -0.165689073 | 6.980264692 | -1.323182317 | 0.217041974 | 0.217041974 | -4.864079706 |
| 1440275_at   | -0.191489959 | 5.683856877 | -1.323163096 | 0.217048118 | 0.217048118 | -4.864099971 |
| 1453615_at   | -0.082402075 | 4.366453034 | -1.323162247 | 0.217048389 | 0.217048389 | -4.864100865 |
| 1435901_at   | 0.102992664  | 8.797745607 | 1.323132889  | 0.217057774 | 0.217057774 | -4.864131815 |
| 1416771_at   | 0.090378206  | 10.05409104 | 1.323115313  | 0.217063393 | 0.217063393 | -4.864150345 |
| 1456719_at   | -0.110405286 | 3.294247313 | -1.323102001 | 0.217067649 | 0.217067649 | -4.864164379 |
| 1421723_at   | 0.091012918  | 3.979129127 | 1.323077101  | 0.217075609 | 0.217075609 | -4.864190628 |
| 1430742_a_at | -0.137299419 | 3.926817421 | -1.322928373 | 0.217123163 | 0.217123163 | -4.864347412 |
| 1416879_at   | 0.107655431  | 5.094299778 | 1.322909099  | 0.217129326 | 0.217129326 | -4.864367729 |
| 1424127_at   | 0.12038025   | 6.412746278 | 1.322863304  | 0.21714397  | 0.21714397  | -4.864416001 |
| 1421177_at   | 0.142069363  | 4.716296177 | 1.322810529  | 0.217160847 | 0.217160847 | -4.864471631 |
| 1426355_a_at | 0.11398315   | 9.381120021 | 1.322744855  | 0.217181851 | 0.217181851 | -4.864540855 |



|              |              |             |              |             |             |              |
|--------------|--------------|-------------|--------------|-------------|-------------|--------------|
| 1445315_at   | 0.113021537  | 4.48689394  | 1.322564571  | 0.217239519 | 0.217239519 | -4.864730872 |
| 1424256_at   | 0.099174363  | 4.612680919 | 1.322518047  | 0.217254402 | 0.217254402 | -4.864779905 |
| 1437648_at   | 0.166359391  | 5.135602307 | 1.322515312  | 0.217255277 | 0.217255277 | -4.864782787 |
| 1416257_at   | 0.113644162  | 9.994473624 | 1.322466808  | 0.217270795 | 0.217270795 | -4.864833905 |
| 1450813_a_at | -0.632053845 | 8.165434834 | -1.322172815 | 0.217364874 | 0.217364874 | -4.86514372  |
| 1454017_at   | -0.101357386 | 3.577640308 | -1.32181947  | 0.21747799  | 0.21747799  | -4.865516022 |
| 1430687_at   | -0.164020928 | 5.44262785  | -1.321801794 | 0.21748365  | 0.21748365  | -4.865534645 |
| 1458378_at   | -0.136511077 | 4.990686973 | -1.32160486  | 0.217546717 | 0.217546717 | -4.865742116 |
| 1458340_at   | -0.092067688 | 3.350397384 | -1.321553304 | 0.21756323  | 0.21756323  | -4.865796427 |
| 1450067_a_at | 0.087067924  | 8.426275819 | 1.321537476  | 0.2175683   | 0.2175683   | -4.8658131   |
| 1418008_at   | -0.095390106 | 8.111229555 | -1.321537056 | 0.217568434 | 0.217568434 | -4.865813543 |
| 1428512_at   | 0.096837979  | 10.13016988 | 1.321533616  | 0.217569536 | 0.217569536 | -4.865817166 |
| 1422965_at   | 0.127476497  | 5.86186489  | 1.321518971  | 0.217574227 | 0.217574227 | -4.865832593 |
| 1440729_at   | 0.174952743  | 3.951727438 | 1.321339696  | 0.217631659 | 0.217631659 | -4.866021435 |
| 1442383_at   | 0.11357448   | 3.996224663 | 1.321299027  | 0.217644689 | 0.217644689 | -4.866064272 |
| 1452246_at   | -0.117239628 | 7.491647218 | -1.321291836 | 0.217646993 | 0.217646993 | -4.866071846 |
| 1429718_at   | -0.230778488 | 4.853993334 | -1.321233271 | 0.217665758 | 0.217665758 | -4.866133531 |
| 1431179_at   | -0.112209767 | 7.053315696 | -1.321137224 | 0.217696536 | 0.217696536 | -4.866234691 |
| 1448522_at   | -0.140343582 | 6.845977912 | -1.320925568 | 0.217764374 | 0.217764374 | -4.866457599 |
| 1447206_at   | -0.090716832 | 7.082736928 | -1.320789547 | 0.21780798  | 0.21780798  | -4.866600838 |
| 1457403_at   | -0.093130346 | 3.178173304 | -1.320774883 | 0.217812681 | 0.217812681 | -4.866616279 |
| 1448354_at   | 0.090765588  | 9.19543027  | 1.320741541  | 0.217823371 | 0.217823371 | -4.86665139  |
| 1456794_at   | 0.131825774  | 4.031099997 | 1.320688402  | 0.217840409 | 0.217840409 | -4.866707344 |
| 1416619_at   | -0.151235197 | 5.727700406 | -1.320471656 | 0.217909918 | 0.217909918 | -4.866935562 |
| 1448781_at   | 0.092032156  | 7.202559283 | 1.320173852  | 0.21800545  | 0.21800545  | -4.867249088 |
| 1457363_at   | 0.090621126  | 5.41729376  | 1.320154294  | 0.218011726 | 0.218011726 | -4.867269678 |
| 1450679_at   | 0.093403833  | 8.129176703 | 1.320003696  | 0.218060051 | 0.218060051 | -4.867428208 |
| 1439801_at   | 0.098180448  | 3.506568103 | 1.319767592  | 0.218135831 | 0.218135831 | -4.867676724 |
| 1420490_at   | -0.121388441 | 3.595612234 | -1.319765259 | 0.21813658  | 0.21813658  | -4.86767918  |
| 1447184_at   | -0.123391076 | 5.809148952 | -1.319678844 | 0.218164322 | 0.218164322 | -4.867770131 |
| 1425534_at   | -0.158772739 | 7.356831464 | -1.319672176 | 0.218166462 | 0.218166462 | -4.867777148 |
| 1446970_at   | 0.102964804  | 4.857645364 | 1.31965262   | 0.218172741 | 0.218172741 | -4.86779773  |
| 1431214_at   | 0.238024497  | 5.865327628 | 1.319576793  | 0.218197087 | 0.218197087 | -4.867877533 |
| 1433148_at   | 0.107092766  | 4.675246709 | 1.319528256  | 0.218212672 | 0.218212672 | -4.867928614 |
| 1440154_at   | 0.226566661  | 4.302792031 | 1.319232882  | 0.218307535 | 0.218307535 | -4.868239439 |
| 1454526_at   | -0.087716383 | 3.613141986 | -1.31918849  | 0.218321795 | 0.218321795 | -4.86828615  |
| 1451872_a_at | -0.144863114 | 6.107273337 | -1.319166226 | 0.218328947 | 0.218328947 | -4.868309576 |
| 1422413_at   | -0.107012612 | 5.979129797 | -1.319142173 | 0.218336675 | 0.218336675 | -4.868334885 |
| 1441994_at   | 0.166465912  | 6.408182362 | 1.319029443  | 0.218372892 | 0.218372892 | -4.868453495 |
| 1419192_at   | -0.133598789 | 4.06049221  | -1.318812647 | 0.218442559 | 0.218442559 | -4.868681581 |
| 1436977_at   | 0.120973677  | 6.372263197 | 1.318736162  | 0.218467141 | 0.218467141 | -4.868762044 |
| 1448393_at   | -0.187123592 | 8.647618009 | -1.318415967 | 0.218570078 | 0.218570078 | -4.869098857 |
| 1431161_at   | -0.104241843 | 5.034476176 | -1.318317562 | 0.218601721 | 0.218601721 | -4.869202359 |
| 1433752_s_at | 0.09781683   | 8.694801958 | 1.318268352  | 0.218617547 | 0.218617547 | -4.869254116 |
| 1416864_at   | 0.101252327  | 7.787924345 | 1.318252483  | 0.218622651 | 0.218622651 | -4.869270806 |
| 1428437_at   | 0.141023083  | 9.552032932 | 1.318221806  | 0.218632517 | 0.218632517 | -4.869303069 |
| 1438785_at   | -0.119057525 | 4.616236252 | -1.318168866 | 0.218649544 | 0.218649544 | -4.869358746 |
| 1418778_at   | 0.157036642  | 4.876332156 | 1.317863243  | 0.218747864 | 0.218747864 | -4.869680144 |
| 1445747_at   | -0.130309882 | 4.520488648 | -1.317859603 | 0.218749035 | 0.218749035 | -4.869683972 |
| 1452438_s_at | 0.179274602  | 7.059802005 | 1.317851229  | 0.21875173  | 0.21875173  | -4.869692778 |
| 1443286_at   | 0.131897186  | 6.686023197 | 1.317769024  | 0.218778182 | 0.218778182 | -4.869779216 |
| 1442918_at   | 0.162764906  | 6.592824272 | 1.317662152  | 0.218812576 | 0.218812576 | -4.869891588 |
| 1456084_x_at | -0.120195377 | 8.733730704 | -1.317620308 | 0.218826043 | 0.218826043 | -4.869935584 |

|              |              |             |              |             |             |              |
|--------------|--------------|-------------|--------------|-------------|-------------|--------------|
| 1457642_at   | 0.100549326  | 7.647463468 | 1.317555287  | 0.218846972 | 0.218846972 | -4.870003947 |
| 1419269_at   | 0.109937779  | 5.919624815 | 1.317454946  | 0.218879272 | 0.218879272 | -4.87010944  |
| 1452414_s_at | 0.155502919  | 7.3873694   | 1.317433482  | 0.218886182 | 0.218886182 | -4.870132006 |
| 1440840_at   | -0.088600964 | 6.921739295 | -1.317247342 | 0.218946114 | 0.218946114 | -4.870327689 |
| 1425415_a_at | 0.143643936  | 4.871912952 | 1.317126629  | 0.218984987 | 0.218984987 | -4.870454581 |
| 1439750_at   | 0.101614029  | 3.908914536 | 1.317070578  | 0.219003039 | 0.219003039 | -4.870513498 |
| 1457383_at   | -0.180656443 | 5.701820197 | -1.316997446 | 0.219026595 | 0.219026595 | -4.870590368 |
| 1426260_a_at | -0.165210919 | 8.770340589 | -1.316929335 | 0.219048534 | 0.219048534 | -4.870661958 |
| 1455373_at   | -0.091046671 | 4.262447505 | -1.316907108 | 0.219055694 | 0.219055694 | -4.870685319 |
| 1446451_at   | -0.092126234 | 3.16720108  | -1.316906774 | 0.219055802 | 0.219055802 | -4.870685671 |
| 1460034_at   | -0.168967789 | 7.735027511 | -1.316906726 | 0.219055818 | 0.219055818 | -4.870685721 |
| 1418308_at   | 0.114561264  | 8.054546285 | 1.316738215  | 0.219110108 | 0.219110108 | -4.870862826 |
| 1446761_at   | -0.085198706 | 3.51322839  | -1.316731281 | 0.219112342 | 0.219112342 | -4.870870113 |
| 1457461_at   | -0.085003255 | 3.921340893 | -1.316654939 | 0.219136941 | 0.219136941 | -4.870950344 |
| 1417921_at   | -0.184305335 | 9.977157681 | -1.316598053 | 0.219155273 | 0.219155273 | -4.871010126 |
| 1421120_at   | -0.117692103 | 4.034197108 | -1.316582248 | 0.219160367 | 0.219160367 | -4.871026735 |
| 1444218_at   | 0.27444038   | 6.413779128 | 1.316366419  | 0.219229931 | 0.219229931 | -4.871253533 |
| 1418710_at   | -0.13382043  | 8.113072615 | -1.316085476 | 0.219320511 | 0.219320511 | -4.871548718 |
| 1442677_at   | 0.147027471  | 3.890934264 | 1.316068585  | 0.219325958 | 0.219325958 | -4.871566464 |
| 1425239_at   | 0.092362257  | 7.131712398 | 1.31602543   | 0.219339874 | 0.219339874 | -4.871611802 |
| 1446145_at   | -0.168864751 | 5.502288777 | -1.315951298 | 0.219363783 | 0.219363783 | -4.871689684 |
| 1428739_at   | -0.080196433 | 7.415844111 | -1.315864903 | 0.219391648 | 0.219391648 | -4.871780445 |
| 1429745_at   | -0.099635024 | 3.630349569 | -1.315859963 | 0.219393242 | 0.219393242 | -4.871785635 |
| 1432937_at   | 0.125290199  | 3.839015497 | 1.315551102  | 0.219492886 | 0.219492886 | -4.87211007  |
| 1443514_at   | 0.090138279  | 3.450559755 | 1.315525199  | 0.219501245 | 0.219501245 | -4.872137277 |
| 1434855_at   | -0.090579164 | 7.732618112 | -1.315511409 | 0.219505695 | 0.219505695 | -4.872151761 |
| 1452972_at   | 0.095905727  | 6.991698346 | 1.315342954  | 0.21956006  | 0.21956006  | -4.872328687 |
| 1436716_at   | -0.147081965 | 4.4080741   | -1.315050001 | 0.219654631 | 0.219654631 | -4.872636336 |
| 1420720_at   | 0.174672847  | 4.105129942 | 1.315031369  | 0.219660647 | 0.219660647 | -4.872655902 |
| 1431205_at   | 0.107857773  | 4.459483788 | 1.314901272  | 0.219702657 | 0.219702657 | -4.872792509 |
| 1419249_at   | 0.083550329  | 9.834588518 | 1.314866166  | 0.219713994 | 0.219713994 | -4.87282937  |
| 1440506_at   | 0.167457534  | 5.793552823 | 1.314853772  | 0.219717997 | 0.219717997 | -4.872842384 |
| 1425935_at   | 0.121105225  | 4.146824763 | 1.314822346  | 0.219728147 | 0.219728147 | -4.872875381 |
| 1420379_at   | 0.088923432  | 5.460944733 | 1.314739075  | 0.219755042 | 0.219755042 | -4.872962812 |
| 1432094_a_at | 0.081859836  | 8.566309045 | 1.314596194  | 0.219801197 | 0.219801197 | -4.873112821 |
| 1432150_at   | -0.122385977 | 3.20079948  | -1.314520902 | 0.219825522 | 0.219825522 | -4.873191866 |
| 1420717_at   | -0.105373241 | 3.53462396  | -1.314461114 | 0.219844839 | 0.219844839 | -4.873254632 |
| 1452343_at   | 0.119822217  | 5.478254548 | 1.314374933  | 0.219872687 | 0.219872687 | -4.873345102 |
| 1425798_a_at | 0.124335632  | 7.273078165 | 1.314364597  | 0.219876027 | 0.219876027 | -4.873355951 |
| 1424058_at   | -0.137850142 | 8.501125147 | -1.314202169 | 0.219928521 | 0.219928521 | -4.873526451 |
| 1436522_at   | 0.088642353  | 7.705952839 | 1.314145184  | 0.21994694  | 0.21994694  | -4.873586266 |
| 1427978_at   | 0.153557639  | 8.416241563 | 1.314043882  | 0.219979687 | 0.219979687 | -4.873692592 |
| 1456056_a_at | 0.144350314  | 9.684600804 | 1.314042189  | 0.219980234 | 0.219980234 | -4.873694369 |
| 1445911_at   | 0.122929476  | 4.379392796 | 1.313980394  | 0.220000212 | 0.220000212 | -4.873759225 |
| 1438745_at   | -0.125847415 | 3.88590609  | -1.313969548 | 0.220003718 | 0.220003718 | -4.873770609 |
| 1459386_at   | 0.146317605  | 4.874727143 | 1.313932703  | 0.220015631 | 0.220015631 | -4.873809279 |
| 1435635_at   | 0.132725398  | 6.515392599 | 1.313861506  | 0.220038651 | 0.220038651 | -4.873884    |
| 1457697_at   | -0.28503775  | 4.507394452 | -1.313795073 | 0.220060133 | 0.220060133 | -4.873953719 |
| 1446520_at   | -0.087439088 | 3.41726433  | -1.313691886 | 0.220093504 | 0.220093504 | -4.874062005 |
| 1453005_at   | 0.193827106  | 7.986950401 | 1.313663625  | 0.220102644 | 0.220102644 | -4.874091661 |
| 1447738_s_at | 0.089577082  | 6.322433901 | 1.313584647  | 0.220128189 | 0.220128189 | -4.874174538 |
| 1447634_x_at | -0.133127716 | 4.709337854 | -1.313570164 | 0.220132874 | 0.220132874 | -4.874189735 |
| 1440384_at   | 0.103003839  | 8.056968132 | 1.31353465   | 0.220144362 | 0.220144362 | -4.874227    |

|                |              |             |              |             |             |              |
|----------------|--------------|-------------|--------------|-------------|-------------|--------------|
| 1445542_at     | -0.101661222 | 3.948489327 | -1.313476241 | 0.220163257 | 0.220163257 | -4.87428829  |
| 1418113_at     | 0.09551175   | 3.573416553 | 1.313237837  | 0.220240393 | 0.220240393 | -4.874538427 |
| 1431778_at     | -0.093872195 | 4.100347561 | -1.313214508 | 0.220247942 | 0.220247942 | -4.874562903 |
| 1448193_at     | 0.122039626  | 7.825214335 | 1.312903148  | 0.220348719 | 0.220348719 | -4.874889539 |
| 1428735_at     | 0.089172033  | 3.234648212 | 1.31268541   | 0.220419217 | 0.220419217 | -4.875117931 |
| 1421381_a_at   | -0.295070196 | 7.181585104 | -1.312647825 | 0.220431388 | 0.220431388 | -4.875157353 |
| 1451494_at     | 0.104125098  | 9.030801225 | 1.31261411   | 0.220442307 | 0.220442307 | -4.875192714 |
| 1453933_at     | -0.146416856 | 5.273624245 | -1.312608414 | 0.220444151 | 0.220444151 | -4.875198689 |
| 1430530_s_at   | 0.094242082  | 8.468753052 | 1.312561178  | 0.220459449 | 0.220459449 | -4.875248231 |
| 1430545_at     | -0.139068025 | 3.86685223  | -1.312542602 | 0.220465465 | 0.220465465 | -4.875267713 |
| 1435808_at     | -0.139415765 | 5.265747543 | -1.312503908 | 0.220477998 | 0.220477998 | -4.875308296 |
| 1433855_at     | 0.10889113   | 8.582590299 | 1.312489629  | 0.220482623 | 0.220482623 | -4.875323271 |
| 1430360_at     | -0.088416575 | 7.918418406 | -1.312432522 | 0.22050112  | 0.22050112  | -4.875383162 |
| 1459242_at     | -0.117626665 | 6.035233794 | -1.312249735 | 0.220560335 | 0.220560335 | -4.87557485  |
| 1417019_a_at   | 0.115986336  | 8.077566184 | 1.312186128  | 0.220580944 | 0.220580944 | -4.875641551 |
| 1424422_s_at   | -0.109856433 | 6.022158852 | -1.312131594 | 0.220598614 | 0.220598614 | -4.875698734 |
| 1427944_at     | 0.091253125  | 7.766392615 | 1.311945728  | 0.220658849 | 0.220658849 | -4.875893623 |
| 1433883_at     | 0.088838998  | 11.8899951  | 1.311884266  | 0.22067877  | 0.22067877  | -4.875958065 |
| 1418333_at     | -0.140481304 | 6.741059476 | -1.311758528 | 0.220719529 | 0.220719529 | -4.876089892 |
| AFFX-CreX-3_at | 0.094817818  | 13.18056688 | 1.311668173  | 0.220748823 | 0.220748823 | -4.876184617 |
| 1459388_at     | 0.286127667  | 6.875903397 | 1.311663794  | 0.220750242 | 0.220750242 | -4.876189207 |
| 1421136_at     | -0.109913514 | 4.927465047 | -1.311655    | 0.220753094 | 0.220753094 | -4.876198427 |
| 1422595_s_at   | 0.09621619   | 8.845395256 | 1.311628025  | 0.22076184  | 0.22076184  | -4.876226706 |
| 1422804_at     | -0.194326759 | 5.008601017 | -1.311564492 | 0.22078244  | 0.22078244  | -4.876293307 |
| 1423518_at     | -0.132376094 | 8.374206354 | -1.311507441 | 0.220800941 | 0.220800941 | -4.876353113 |
| 1429468_at     | -0.12018918  | 7.532782235 | -1.311372999 | 0.220844542 | 0.220844542 | -4.876494039 |
| 1454317_at     | -0.120472766 | 4.726320526 | -1.311328556 | 0.220858957 | 0.220858957 | -4.876540623 |
| 1457692_at     | -0.193190332 | 7.377260698 | -1.311321247 | 0.220861328 | 0.220861328 | -4.876548284 |
| 1433792_at     | -0.137701115 | 7.029386967 | -1.311261615 | 0.220880671 | 0.220880671 | -4.876610789 |
| 1446565_at     | 0.282557188  | 6.70376137  | 1.311213516  | 0.220896274 | 0.220896274 | -4.876661202 |
| 1453753_at     | -0.117235817 | 7.374205505 | -1.311047063 | 0.220950277 | 0.220950277 | -4.876835656 |
| 1449783_at     | 0.091979791  | 3.714300873 | 1.311045077  | 0.220950922 | 0.220950922 | -4.876837738 |
| 1457766_at     | -0.102017958 | 4.06423482  | -1.310941691 | 0.220984469 | 0.220984469 | -4.876946086 |
| 1442832_at     | 0.280741356  | 5.607563191 | 1.310939094  | 0.220985312 | 0.220985312 | -4.876948808 |
| 1428358_at     | -0.119326981 | 4.065495176 | -1.310885948 | 0.221002559 | 0.221002559 | -4.877004502 |
| 1428394_at     | -0.09991236  | 6.187466069 | -1.310882332 | 0.221003733 | 0.221003733 | -4.877008293 |
| 1440207_at     | -0.132968586 | 6.884040164 | -1.310881354 | 0.22100405  | 0.22100405  | -4.877009317 |
| 1426182_a_at   | -0.096402928 | 3.218890226 | -1.310861057 | 0.221010637 | 0.221010637 | -4.877030587 |
| 1453202_at     | -0.154701136 | 6.761821531 | -1.310835429 | 0.221018955 | 0.221018955 | -4.877057444 |
| 1417529_at     | 0.176247959  | 6.04903904  | 1.310810609  | 0.22102701  | 0.22102701  | -4.877083453 |
| 1448699_at     | -0.093273578 | 8.143420957 | -1.310800806 | 0.221030192 | 0.221030192 | -4.877093725 |
| 1458699_at     | 0.104339036  | 4.112665808 | 1.310720464  | 0.22105627  | 0.22105627  | -4.877177913 |
| 1450027_at     | -0.135897422 | 9.515268861 | -1.310643699 | 0.221081189 | 0.221081189 | -4.877258351 |
| 1452190_at     | 0.180880144  | 7.851179182 | 1.31049981   | 0.221127904 | 0.221127904 | -4.877409115 |
| 1449832_at     | -0.229341588 | 4.377968876 | -1.310399974 | 0.221160321 | 0.221160321 | -4.877513715 |
| 1445114_at     | 0.099144616  | 4.322969758 | 1.310391913  | 0.221162939 | 0.221162939 | -4.877522161 |
| 1433283_s_at   | 0.211367425  | 4.740649217 | 1.310369293  | 0.221170284 | 0.221170284 | -4.87754586  |
| 1419327_at     | -0.110220794 | 4.347414737 | -1.3103349   | 0.221181453 | 0.221181453 | -4.877581892 |
| 1420702_at     | -0.121428706 | 3.390050139 | -1.310268347 | 0.221203067 | 0.221203067 | -4.877651615 |
| 1436320_at     | -0.259638078 | 8.69887416  | -1.310032131 | 0.221279796 | 0.221279796 | -4.877899067 |
| 1425738_at     | -0.095607543 | 4.748131737 | -1.309981851 | 0.221296132 | 0.221296132 | -4.877951735 |
| 1441600_at     | -0.118296541 | 3.92424515  | -1.309919533 | 0.221316379 | 0.221316379 | -4.87801701  |
| 1447765_at     | -0.097157754 | 4.171752888 | -1.309812572 | 0.221351135 | 0.221351135 | -4.878129044 |

|              |              |             |              |             |             |              |
|--------------|--------------|-------------|--------------|-------------|-------------|--------------|
| 1443367_at   | -0.146905478 | 3.500900586 | -1.309803162 | 0.221354193 | 0.221354193 | -4.878138899 |
| 1435972_at   | 0.168782328  | 7.615489714 | 1.309802052  | 0.221354554 | 0.221354554 | -4.878140062 |
| 1431307_at   | -0.103493844 | 3.538661127 | -1.3097489   | 0.221371827 | 0.221371827 | -4.878195731 |
| 1437248_at   | 0.345710489  | 6.606161617 | 1.309738367  | 0.22137525  | 0.22137525  | -4.878206764 |
| 1430969_at   | 0.136698642  | 5.466040348 | 1.309708009  | 0.221385116 | 0.221385116 | -4.878238559 |
| 1429418_at   | 0.097462449  | 8.790887664 | 1.309555353  | 0.221434734 | 0.221434734 | -4.878398435 |
| 1452081_a_at | -0.080169434 | 6.112420766 | -1.30955462  | 0.221434972 | 0.221434972 | -4.878399202 |
| 1417624_at   | 0.080432516  | 9.373676607 | 1.30953159   | 0.221442459 | 0.221442459 | -4.87842332  |
| 1416689_at   | 0.138355898  | 7.416098851 | 1.309498717  | 0.221453145 | 0.221453145 | -4.878457746 |
| 1458849_at   | 0.13754493   | 5.176336125 | 1.309494705  | 0.221454449 | 0.221454449 | -4.878461948 |
| 1431441_at   | -0.112443668 | 4.730857019 | -1.309488995 | 0.221456306 | 0.221456306 | -4.878467928 |
| 1432386_a_at | -0.092342089 | 4.130779409 | -1.309387393 | 0.221489338 | 0.221489338 | -4.878574325 |
| 1419512_at   | -0.120463186 | 7.44194622  | -1.309384613 | 0.221490241 | 0.221490241 | -4.878577236 |
| 1459824_at   | -0.120869298 | 4.884214269 | -1.309247615 | 0.221534788 | 0.221534788 | -4.878720691 |
| 1442763_s_at | -0.116141481 | 5.217916683 | -1.309220611 | 0.221543569 | 0.221543569 | -4.878748966 |
| 1424712_at   | 0.082873023  | 9.358608841 | 1.309195251  | 0.221551816 | 0.221551816 | -4.878775521 |
| 1418006_at   | 0.096574524  | 8.973488554 | 1.30907582   | 0.221590659 | 0.221590659 | -4.878900569 |
| 1456458_at   | 0.119013311  | 3.803266994 | 1.309033136  | 0.221604542 | 0.221604542 | -4.87894526  |
| 1458420_at   | -0.108397927 | 7.036160932 | -1.309007423 | 0.221612906 | 0.221612906 | -4.878972181 |
| 1454824_s_at | 0.118852216  | 7.596821235 | 1.308995945  | 0.22161664  | 0.22161664  | -4.878984198 |
| 1457946_at   | -0.094033511 | 5.782782362 | -1.308986587 | 0.221619684 | 0.221619684 | -4.878993995 |
| 1423936_at   | 0.084713993  | 8.970419717 | 1.308908011  | 0.221645245 | 0.221645245 | -4.879076259 |
| 1429715_at   | 0.093871686  | 6.209595022 | 1.308840555  | 0.221667191 | 0.221667191 | -4.87914688  |
| 1451992_at   | -0.119372007 | 7.751346327 | -1.308830624 | 0.221670422 | 0.221670422 | -4.879157276 |
| 1441695_at   | -0.120335456 | 3.774193712 | -1.308741846 | 0.221699307 | 0.221699307 | -4.879250214 |
| 1449135_at   | 0.090750947  | 8.721188386 | 1.30857765   | 0.22175274  | 0.22175274  | -4.879422094 |
| 1419889_at   | 0.120414866  | 3.519178247 | 1.308572675  | 0.221754359 | 0.221754359 | -4.879427301 |
| 1427085_at   | 0.081698166  | 9.004902318 | 1.308479192  | 0.221784786 | 0.221784786 | -4.879525152 |
| 1433817_at   | -0.12095164  | 7.015558447 | -1.308356031 | 0.221824876 | 0.221824876 | -4.879654061 |
| 1416750_at   | 0.13499687   | 8.608361072 | 1.308078009  | 0.221915399 | 0.221915399 | -4.879945028 |
| 1451672_at   | 0.117084456  | 8.705838268 | 1.308023308  | 0.221933214 | 0.221933214 | -4.880002272 |
| 1430149_at   | -0.100977456 | 5.224163674 | -1.307744723 | 0.222023957 | 0.222023957 | -4.880293781 |
| 1419956_at   | -0.086818606 | 3.653894056 | -1.307705509 | 0.222036732 | 0.222036732 | -4.880334811 |
| 1417050_at   | -0.082260197 | 6.711678951 | -1.307681212 | 0.222044649 | 0.222044649 | -4.880360232 |
| 1456313_x_at | -0.087562329 | 8.800702983 | -1.307484559 | 0.222108728 | 0.222108728 | -4.880565978 |
| 1429012_at   | -0.105017827 | 7.942433798 | -1.307430557 | 0.222126327 | 0.222126327 | -4.880622473 |
| 1428036_at   | -0.113916275 | 3.657260157 | -1.307376601 | 0.222143912 | 0.222143912 | -4.880678918 |
| 1429087_at   | 0.108790942  | 6.318999809 | 1.30725313   | 0.222184159 | 0.222184159 | -4.880808082 |
| 1440854_at   | 0.144945714  | 7.146861269 | 1.307145049  | 0.222219393 | 0.222219393 | -4.880921138 |
| 1446280_at   | -0.110891482 | 7.157641068 | -1.30711681  | 0.2222286   | 0.2222286   | -4.880950676 |
| 1421786_at   | 0.119792093  | 7.814414644 | 1.307107024  | 0.222231791 | 0.222231791 | -4.880960912 |
| 1426489_s_at | 0.096039605  | 9.622326369 | 1.307065475  | 0.222245338 | 0.222245338 | -4.881004371 |
| 1447161_at   | -0.108331377 | 3.180978051 | -1.307014246 | 0.222262042 | 0.222262042 | -4.881057954 |
| 1448180_a_at | 0.097706073  | 10.62584716 | 1.306779846  | 0.222338485 | 0.222338485 | -4.881303109 |
| 1421125_at   | -0.089440134 | 3.59917913  | -1.306694552 | 0.222366307 | 0.222366307 | -4.881392309 |
| 1439351_at   | 0.135250845  | 3.740492308 | 1.306643314  | 0.222383021 | 0.222383021 | -4.881445892 |
| 1454746_at   | 0.112646299  | 7.287259894 | 1.306634169  | 0.222386005 | 0.222386005 | -4.881455455 |
| 1425965_at   | -0.173776266 | 4.78626279  | -1.306482349 | 0.222435537 | 0.222435537 | -4.881614214 |
| 1445538_at   | -0.161568337 | 5.111412341 | -1.306449082 | 0.222446392 | 0.222446392 | -4.881649    |
| 1452079_s_at | 0.169027766  | 8.029356753 | 1.306363968  | 0.222474166 | 0.222474166 | -4.881737997 |
| 1440718_at   | 0.091672942  | 3.944202794 | 1.306315538  | 0.222489971 | 0.222489971 | -4.881788635 |
| 1448863_a_at | 0.152539774  | 9.539482761 | 1.30618215   | 0.222533507 | 0.222533507 | -4.881928098 |
| 1427704_a_at | 0.17100796   | 3.879263997 | 1.306100062  | 0.222560302 | 0.222560302 | -4.88201392  |

|              |              |             |              |             |             |              |
|--------------|--------------|-------------|--------------|-------------|-------------|--------------|
| 1416709_a_at | 0.15650837   | 8.722570197 | 1.306067235  | 0.222571018 | 0.222571018 | -4.882048239 |
| 1446066_at   | 0.102673414  | 5.129793625 | 1.306055975  | 0.222574694 | 0.222574694 | -4.882060011 |
| 1441534_at   | -0.129507881 | 3.74142833  | -1.305972407 | 0.222601977 | 0.222601977 | -4.882147375 |
| 1445461_at   | 0.142506386  | 5.459292016 | 1.305937241  | 0.222613459 | 0.222613459 | -4.882184137 |
| 1453634_a_at | -0.124105593 | 9.508536566 | -1.305868469 | 0.222635915 | 0.222635915 | -4.882256029 |
| 1424828_a_at | 0.090161294  | 10.71903286 | 1.305828655  | 0.222648915 | 0.222648915 | -4.882297647 |
| 1448799_s_at | 0.09545487   | 9.557064689 | 1.305759602  | 0.222671466 | 0.222671466 | -4.88236983  |
| 1447050_at   | 0.087641228  | 3.460931422 | 1.305732472  | 0.222680326 | 0.222680326 | -4.882398188 |
| 1442263_at   | -0.105719109 | 3.252438562 | -1.305690253 | 0.222694114 | 0.222694114 | -4.882442318 |
| 1441512_at   | -0.142723379 | 3.943413949 | -1.305679496 | 0.222697627 | 0.222697627 | -4.882453561 |
| 1436609_a_at | -0.086970931 | 10.45838222 | -1.305658811 | 0.222704384 | 0.222704384 | -4.882475183 |
| 1418032_at   | 0.126399527  | 7.93766373  | 1.305584447  | 0.222728673 | 0.222728673 | -4.882552909 |
| 1443503_at   | -0.133345667 | 4.111688291 | -1.305564251 | 0.22273527  | 0.22273527  | -4.882574018 |
| 1440181_at   | -0.095674977 | 4.096536875 | -1.3055628   | 0.222735744 | 0.222735744 | -4.882575534 |
| 1458153_at   | -0.114291207 | 4.237528337 | -1.305559082 | 0.222736959 | 0.222736959 | -4.882579421 |
| 1453660_at   | 0.115196488  | 5.013688092 | 1.305525009  | 0.222748089 | 0.222748089 | -4.882615032 |
| 1440379_at   | -0.117991974 | 5.675309085 | -1.305522919 | 0.222748772 | 0.222748772 | -4.882617218 |
| 1450728_at   | 0.123386954  | 7.733612561 | 1.305312272  | 0.222817593 | 0.222817593 | -4.882837367 |
| 1436637_at   | -0.117785629 | 6.036478488 | -1.305305138 | 0.222819924 | 0.222819924 | -4.882844822 |
| 1458854_at   | 0.153429312  | 3.276184358 | 1.305248257  | 0.222838511 | 0.222838511 | -4.882904266 |
| 1427932_s_at | 0.157148076  | 8.884811082 | 1.305242828  | 0.222840285 | 0.222840285 | -4.882909938 |
| 1452347_at   | -0.113326443 | 9.83520498  | -1.305242448 | 0.22284041  | 0.22284041  | -4.882910336 |
| 1427702_at   | 0.115075002  | 8.111428949 | 1.305239454  | 0.222841388 | 0.222841388 | -4.882913464 |
| 1453209_at   | 0.08355573   | 8.14262252  | 1.30510289   | 0.222886019 | 0.222886019 | -4.883056172 |
| 1439652_at   | -0.09579523  | 8.85331771  | -1.305057189 | 0.222900956 | 0.222900956 | -4.883103926 |
| 1442171_at   | 0.129384956  | 7.23774155  | 1.304925839  | 0.222943892 | 0.222943892 | -4.883241173 |
| 1423829_at   | 0.09121092   | 10.12925585 | 1.304733557  | 0.223006759 | 0.223006759 | -4.88344207  |
| 1450243_a_at | -0.099811176 | 4.094511511 | -1.304732974 | 0.223006949 | 0.223006949 | -4.88344268  |
| 1455858_x_at | -0.136812037 | 4.736939649 | -1.304700602 | 0.223017535 | 0.223017535 | -4.8834765   |
| 1448039_at   | 0.118309681  | 3.728508885 | 1.304633764  | 0.223039392 | 0.223039392 | -4.883546327 |
| 1459193_at   | 0.154941657  | 5.238562858 | 1.30445225   | 0.223098758 | 0.223098758 | -4.883735947 |
| 1435007_s_at | 0.132701415  | 6.334401247 | 1.304363628  | 0.223127748 | 0.223127748 | -4.883828521 |
| 1418773_at   | -0.106074944 | 7.796461796 | -1.304358844 | 0.223129313 | 0.223129313 | -4.883833518 |
| 1426719_at   | 0.089649407  | 8.861517601 | 1.304248537  | 0.223165401 | 0.223165401 | -4.883948737 |
| 1422749_at   | 0.15023674   | 4.405092355 | 1.304170532  | 0.223190924 | 0.223190924 | -4.884030213 |
| 1458980_at   | 0.150554328  | 5.824360498 | 1.304073075  | 0.223222815 | 0.223222815 | -4.884132    |
| 1440551_at   | -0.109639115 | 7.661878787 | -1.304021877 | 0.22323957  | 0.22323957  | -4.884185472 |
| 1418604_at   | 0.124596005  | 5.45303186  | 1.30398079   | 0.223253017 | 0.223253017 | -4.884228381 |
| 1419167_at   | -0.146999344 | 4.34592538  | -1.303903495 | 0.223278316 | 0.223278316 | -4.884309104 |
| 1452145_at   | -0.126296813 | 7.485349968 | -1.303867164 | 0.223290208 | 0.223290208 | -4.884347045 |
| 1423316_at   | -0.08830359  | 9.773040757 | -1.303757336 | 0.223326161 | 0.223326161 | -4.884461736 |
| 1435381_at   | -0.12376041  | 8.070503833 | -1.30373621  | 0.223333077 | 0.223333077 | -4.884483797 |
| 1418936_at   | -0.112067124 | 5.605528135 | -1.303654625 | 0.223359788 | 0.223359788 | -4.884568989 |
| 1455448_at   | 0.082354252  | 6.48502997  | 1.303411016  | 0.223439562 | 0.223439562 | -4.88482335  |
| 1441868_x_at | -0.172764827 | 5.529780232 | -1.303392535 | 0.223445615 | 0.223445615 | -4.884842645 |
| 1418582_at   | -0.142405661 | 6.357222581 | -1.303353772 | 0.223458311 | 0.223458311 | -4.884883115 |
| 1449988_at   | 0.145422967  | 5.503577413 | 1.303314755  | 0.223471091 | 0.223471091 | -4.88492385  |
| 1419419_at   | -0.105632448 | 4.17380342  | -1.303308944 | 0.223472995 | 0.223472995 | -4.884929917 |
| 1458346_x_at | -0.138292984 | 4.753527134 | -1.303235049 | 0.2234972   | 0.2234972   | -4.885007064 |
| 1420300_at   | 0.0916172    | 3.416801152 | 1.302929852  | 0.223597197 | 0.223597197 | -4.885325658 |
| 1423381_at   | 0.144533381  | 4.663488084 | 1.30283021   | 0.223629853 | 0.223629853 | -4.885429664 |
| 1416274_at   | -0.094262909 | 6.253961004 | -1.302786504 | 0.223644178 | 0.223644178 | -4.885475282 |
| 1417700_at   | -0.089699943 | 7.868204656 | -1.302746547 | 0.223657275 | 0.223657275 | -4.885516986 |

|              |              |             |              |             |             |              |
|--------------|--------------|-------------|--------------|-------------|-------------|--------------|
| 1416720_at   | 0.099260286  | 9.769437748 | 1.302592037  | 0.223707925 | 0.223707925 | -4.885678245 |
| 1416880_at   | 0.112342503  | 9.717511819 | 1.302585823  | 0.223709962 | 0.223709962 | -4.885684731 |
| 1453330_at   | 0.122380078  | 5.45638508  | 1.302527143  | 0.223729201 | 0.223729201 | -4.88574597  |
| 1422870_at   | -0.159760234 | 4.346999777 | -1.302447181 | 0.223755419 | 0.223755419 | -4.885829418 |
| 1444647_at   | 0.13438158   | 4.952944773 | 1.302420412  | 0.223764197 | 0.223764197 | -4.885857354 |
| 1459574_at   | 0.110913039  | 3.632532666 | 1.302367309  | 0.223781611 | 0.223781611 | -4.885912768 |
| 1429754_a_at | 0.104971953  | 3.216594623 | 1.302314592  | 0.223798899 | 0.223798899 | -4.885967779 |
| 1444273_at   | -0.130510048 | 7.303498838 | -1.302236537 | 0.223824499 | 0.223824499 | -4.886049228 |
| 1451345_at   | 0.110139136  | 8.843438866 | 1.302192823  | 0.223838836 | 0.223838836 | -4.886094841 |
| 1458869_at   | -0.110282744 | 4.346827205 | -1.302144245 | 0.223854771 | 0.223854771 | -4.886145529 |
| 1424473_at   | 0.08212476   | 8.973859643 | 1.302085398  | 0.223874075 | 0.223874075 | -4.886206929 |
| 1423565_at   | 0.079691774  | 11.59454088 | 1.301849399  | 0.223951504 | 0.223951504 | -4.88645315  |
| 1417846_at   | 0.117141662  | 7.485407871 | 1.301845144  | 0.223952901 | 0.223952901 | -4.88645759  |
| 1457368_at   | -0.129536602 | 7.210525627 | -1.301836159 | 0.223955849 | 0.223955849 | -4.886466964 |
| 1419783_at   | -0.095876042 | 3.308762943 | -1.301799457 | 0.223967893 | 0.223967893 | -4.886505252 |
| 1448371_at   | -0.672982361 | 9.484523586 | -1.30173455  | 0.223989194 | 0.223989194 | -4.886572964 |
| 1447375_at   | -0.134309095 | 4.550673246 | -1.301725488 | 0.223992168 | 0.223992168 | -4.886582417 |
| 1437013_x_at | -0.098597799 | 9.108332099 | -1.301639544 | 0.224020375 | 0.224020375 | -4.886672072 |
| 1437707_at   | 0.175410137  | 4.012465645 | 1.301510818  | 0.22406263  | 0.22406263  | -4.886806348 |
| 1441049_at   | -0.104256869 | 4.555832747 | -1.301351228 | 0.224115025 | 0.224115025 | -4.886972806 |
| 1440237_at   | 0.09889937   | 5.462773964 | 1.30124094   | 0.224151239 | 0.224151239 | -4.887087833 |
| 1417792_at   | 0.109476296  | 8.727990548 | 1.301233234  | 0.22415377  | 0.22415377  | -4.88709587  |
| 1436797_a_at | -0.11522763  | 9.774143448 | -1.300967869 | 0.224240926 | 0.224240926 | -4.88737261  |
| 1460599_at   | 0.104238681  | 7.032210404 | 1.300966845  | 0.224241262 | 0.224241262 | -4.887373678 |
| 1444009_at   | -0.10716968  | 6.229490695 | -1.300958717 | 0.224243932 | 0.224243932 | -4.887382153 |
| 1419013_at   | 0.101480613  | 7.585610334 | 1.300866641  | 0.224274181 | 0.224274181 | -4.887478168 |
| 1442732_at   | 0.102706954  | 7.017762942 | 1.300846007  | 0.22428096  | 0.22428096  | -4.887499683 |
| 1452961_at   | 0.264594031  | 7.972304293 | 1.300816396  | 0.224290689 | 0.224290689 | -4.887530559 |
| 1418132_a_at | -0.142151296 | 7.929213135 | -1.300764419 | 0.224307767 | 0.224307767 | -4.887584756 |
| 1449681_at   | -0.087661642 | 5.688611756 | -1.300759432 | 0.224309405 | 0.224309405 | -4.887589956 |
| 1456130_at   | 0.18337324   | 3.894863768 | 1.300679271  | 0.224335745 | 0.224335745 | -4.887673537 |
| 1449272_at   | 0.105478101  | 7.310288744 | 1.300617906  | 0.224355912 | 0.224355912 | -4.887737518 |
| 1433781_a_at | 0.101883287  | 8.443397557 | 1.300507278  | 0.22439227  | 0.22439227  | -4.887852858 |
| 1448899_s_at | 0.086692334  | 8.147038814 | 1.300398048  | 0.224428174 | 0.224428174 | -4.887966733 |
| 1443607_at   | 0.107545898  | 4.071340145 | 1.300283254  | 0.224465912 | 0.224465912 | -4.888086402 |
| 1447978_at   | -0.108833385 | 3.109146163 | -1.300097818 | 0.224526884 | 0.224526884 | -4.888279699 |
| 1453698_at   | 0.32382948   | 6.803095035 | 1.300077326  | 0.224533623 | 0.224533623 | -4.888301059 |
| 1455928_x_at | 0.126227952  | 9.122567208 | 1.300028779  | 0.224549588 | 0.224549588 | -4.88835166  |
| 1422218_at   | -0.109325865 | 4.518775592 | -1.299931326 | 0.224581639 | 0.224581639 | -4.888453233 |
| 1426352_s_at | -0.20797034  | 5.296374545 | -1.299810616 | 0.224621345 | 0.224621345 | -4.88857904  |
| 1448752_at   | 0.160849595  | 8.031415484 | 1.299769196  | 0.224634971 | 0.224634971 | -4.888622207 |
| 1424459_at   | -0.115939065 | 9.296875051 | -1.299648154 | 0.224674794 | 0.224674794 | -4.88874835  |
| 1437421_at   | 0.093835371  | 4.564910254 | 1.299604192  | 0.224689259 | 0.224689259 | -4.888794162 |
| 1441738_at   | -0.095168985 | 5.162230376 | -1.29953108  | 0.224713316 | 0.224713316 | -4.888870349 |
| 1420696_at   | -0.122345917 | 6.1771977   | -1.299356875 | 0.224770648 | 0.224770648 | -4.889051871 |
| 1441635_at   | 0.204076497  | 6.724593716 | 1.29935417   | 0.224771538 | 0.224771538 | -4.88905469  |
| 1420448_at   | -0.133369039 | 5.044701167 | -1.299274967 | 0.224797609 | 0.224797609 | -4.889137214 |
| 1420420_at   | -0.093799778 | 3.514503484 | -1.299156895 | 0.224836478 | 0.224836478 | -4.889260232 |
| 1434705_at   | 0.123116012  | 10.32318711 | 1.299149217  | 0.224839005 | 0.224839005 | -4.88926823  |
| 1431742_at   | -0.103912229 | 4.212656808 | -1.299140762 | 0.224841789 | 0.224841789 | -4.889277039 |
| 1439434_x_at | 0.176281109  | 3.760840247 | 1.299016519  | 0.224882696 | 0.224882696 | -4.889406477 |
| 1432078_at   | 0.077568361  | 3.824574279 | 1.298971172  | 0.224897628 | 0.224897628 | -4.889453718 |
| 1422548_at   | -0.127815771 | 5.475304775 | -1.298944965 | 0.224906258 | 0.224906258 | -4.889481019 |

|              |              |             |              |             |             |              |
|--------------|--------------|-------------|--------------|-------------|-------------|--------------|
| 1420228_at   | 0.104849842  | 3.569445983 | 1.29891825   | 0.224915056 | 0.224915056 | -4.889508849 |
| 1447065_at   | -0.106423984 | 4.908954804 | -1.298869516 | 0.224931105 | 0.224931105 | -4.889559616 |
| 1451275_at   | -0.101162509 | 8.753436229 | -1.298843038 | 0.224939825 | 0.224939825 | -4.889587198 |
| 1432440_at   | -0.126311744 | 3.739670847 | -1.298777779 | 0.224961319 | 0.224961319 | -4.889655177 |
| 1446472_at   | 0.105814434  | 7.084131628 | 1.298757715  | 0.224967927 | 0.224967927 | -4.889676075 |
| 1456746_a_at | -0.264482459 | 5.666274096 | -1.298453065 | 0.225068292 | 0.225068292 | -4.889993388 |
| 1447275_at   | -0.084968193 | 6.729730037 | -1.298302191 | 0.22511801  | 0.22511801  | -4.890150514 |
| 1447908_x_at | -0.083028541 | 9.385897797 | -1.298273527 | 0.225127457 | 0.225127457 | -4.890180366 |
| 1440554_at   | -0.0799308   | 5.998719246 | -1.298188216 | 0.225155574 | 0.225155574 | -4.890269205 |
| 1447328_at   | -0.097529873 | 4.337216535 | -1.298160184 | 0.225164814 | 0.225164814 | -4.890298396 |
| 1417590_at   | 0.107591397  | 6.013340697 | 1.298147459  | 0.225169009 | 0.225169009 | -4.890311647 |
| 1418027_at   | 0.127780731  | 6.875887858 | 1.298144861  | 0.225169865 | 0.225169865 | -4.890314353 |
| 1450497_at   | -0.137098529 | 4.603845987 | -1.298144819 | 0.225169879 | 0.225169879 | -4.890314397 |
| 1427216_at   | 0.146992308  | 6.584254295 | 1.298117868  | 0.225178763 | 0.225178763 | -4.89034246  |
| 1437087_at   | 0.161520528  | 8.165873334 | 1.298089492  | 0.225188117 | 0.225188117 | -4.890372009 |
| 1423885_at   | -0.112308785 | 8.334997262 | -1.298040217 | 0.225204361 | 0.225204361 | -4.890423318 |
| 1428926_at   | 0.099842078  | 7.007598838 | 1.29801081   | 0.225214055 | 0.225214055 | -4.890453938 |
| 1432012_a_at | -0.100450721 | 5.921571239 | -1.297950578 | 0.225233913 | 0.225233913 | -4.890516653 |
| 1451043_at   | 0.117797536  | 4.376132091 | 1.297893654  | 0.225252682 | 0.225252682 | -4.890575923 |
| 1418408_at   | 0.102231927  | 7.494473785 | 1.297891379  | 0.225253432 | 0.225253432 | -4.890578292 |
| 1446059_at   | -0.087461246 | 5.015196745 | -1.297813153 | 0.225279227 | 0.225279227 | -4.890659739 |
| 1431562_at   | -0.157247464 | 3.722350725 | -1.297549185 | 0.225366287 | 0.225366287 | -4.89093455  |
| 1449306_at   | -0.091527983 | 3.273593571 | -1.297536939 | 0.225370326 | 0.225370326 | -4.890947298 |
| 1449996_a_at | -0.083128693 | 5.093131522 | -1.297505986 | 0.225380537 | 0.225380537 | -4.89097952  |
| 1430588_at   | -0.084943482 | 3.666426588 | -1.297480521 | 0.225388937 | 0.225388937 | -4.891006028 |
| 1417349_at   | 0.086395683  | 9.532833089 | 1.297349117  | 0.22543229  | 0.22543229  | -4.891142812 |
| 1427660_x_at | -0.079918495 | 4.81022664  | -1.297255515 | 0.225463176 | 0.225463176 | -4.891240241 |
| 1431033_x_at | 0.173080794  | 7.952798614 | 1.297246502  | 0.22546615  | 0.22546615  | -4.891249622 |
| 1435505_at   | -0.184313575 | 8.850511227 | -1.29704102  | 0.225533965 | 0.225533965 | -4.891463488 |
| 1430039_at   | -0.119299274 | 5.346978523 | -1.297016195 | 0.225542159 | 0.225542159 | -4.891489324 |
| 1457586_at   | 0.12223133   | 6.931406001 | 1.297008264  | 0.225544777 | 0.225544777 | -4.891497578 |
| 1435375_at   | 0.101461036  | 7.028319911 | 1.2969025    | 0.22557969  | 0.22557969  | -4.891607647 |
| 1460556_at   | 0.103338585  | 8.78327201  | 1.296736094  | 0.22563463  | 0.22563463  | -4.891780813 |
| 1421762_at   | 0.083101338  | 3.912454287 | 1.296733353  | 0.225635535 | 0.225635535 | -4.891783665 |
| 1460195_at   | 0.118868214  | 8.688750727 | 1.296664987  | 0.22565811  | 0.22565811  | -4.891854805 |
| 1442013_at   | -0.113558872 | 3.95472936  | -1.296657878 | 0.225660458 | 0.225660458 | -4.891862202 |
| 1457500_at   | -0.110176915 | 6.452383473 | -1.296603054 | 0.225678563 | 0.225678563 | -4.891919248 |
| 1439574_at   | -0.112056585 | 5.866680203 | -1.296517654 | 0.225706767 | 0.225706767 | -4.892008106 |
| 1451523_a_at | -0.098931267 | 7.361727511 | -1.296425716 | 0.225737134 | 0.225737134 | -4.892103762 |
| 1440031_at   | -0.16396788  | 5.586062271 | -1.296283959 | 0.225783963 | 0.225783963 | -4.892251244 |
| 1423217_a_at | 0.120264609  | 8.746039699 | 1.296170334  | 0.225821504 | 0.225821504 | -4.892369451 |
| 1422042_at   | -0.131913262 | 4.354721668 | -1.296100533 | 0.225844569 | 0.225844569 | -4.892442063 |
| 1455487_at   | -0.11677798  | 8.049590426 | -1.296087549 | 0.225848859 | 0.225848859 | -4.892455569 |
| 1434061_at   | 0.128316616  | 8.000989179 | 1.29608547   | 0.225849546 | 0.225849546 | -4.892457732 |
| 1434491_a_at | 0.124452041  | 10.75433866 | 1.296082418  | 0.225850555 | 0.225850555 | -4.892460907 |
| 1425273_s_at | 0.115204616  | 7.055110763 | 1.295965615  | 0.225889156 | 0.225889156 | -4.892582407 |
| 1444389_at   | -0.101740506 | 4.484520046 | -1.295964439 | 0.225889544 | 0.225889544 | -4.89258363  |
| 1430531_at   | 0.089763131  | 4.260369691 | 1.295911916  | 0.225906904 | 0.225906904 | -4.892638262 |
| 1436297_a_at | 0.152058403  | 7.844305213 | 1.295854764  | 0.225925794 | 0.225925794 | -4.892697708 |
| 1455800_x_at | 0.100744033  | 9.772918103 | 1.295831211  | 0.22593358  | 0.22593358  | -4.892722206 |
| 1455134_at   | -0.092179648 | 7.41078719  | -1.295721959 | 0.225969696 | 0.225969696 | -4.892835837 |
| 1437808_x_at | 0.097301165  | 3.85836285  | 1.295647144  | 0.225994431 | 0.225994431 | -4.892913647 |
| 1421188_at   | -0.118473699 | 4.095191054 | -1.295638397 | 0.225997323 | 0.225997323 | -4.892922745 |

|              |              |             |              |             |             |              |
|--------------|--------------|-------------|--------------|-------------|-------------|--------------|
| 1427463_at   | 0.094949694  | 7.265717489 | 1.295613491  | 0.226005558 | 0.226005558 | -4.892948647 |
| 1453954_a_at | 0.079850225  | 6.982216325 | 1.295419582  | 0.226069681 | 0.226069681 | -4.893150302 |
| 1454140_at   | -0.099597125 | 3.742847428 | -1.295393399 | 0.22607834  | 0.22607834  | -4.893177529 |
| 1437540_at   | -0.162656484 | 4.509726967 | -1.295390797 | 0.2260792   | 0.2260792   | -4.893180235 |
| 1434274_at   | 0.091006261  | 9.310814789 | 1.2952065    | 0.22614016  | 0.22614016  | -4.893371873 |
| 1448600_s_at | 0.138230779  | 7.72039917  | 1.295147218  | 0.226159772 | 0.226159772 | -4.893433512 |
| 1425772_at   | -0.09462694  | 3.950261539 | -1.295056146 | 0.226189903 | 0.226189903 | -4.893528202 |
| 1446427_at   | -0.111621781 | 5.701386438 | -1.295035692 | 0.226196671 | 0.226196671 | -4.893549468 |
| 1457284_at   | 0.085884273  | 6.566543314 | 1.294952995  | 0.226224034 | 0.226224034 | -4.893635446 |
| 1422250_at   | -0.117402652 | 3.540906969 | -1.294868393 | 0.226252031 | 0.226252031 | -4.8937234   |
| 1428778_at   | 0.128154566  | 6.622041023 | 1.294843703  | 0.226260202 | 0.226260202 | -4.893749068 |
| 1429315_at   | 0.14945591   | 6.368318701 | 1.29479453   | 0.226276477 | 0.226276477 | -4.893800187 |
| 1459373_at   | -0.146116102 | 5.042462918 | -1.294679115 | 0.226314679 | 0.226314679 | -4.893920165 |
| 1448663_s_at | 0.100751173  | 7.326263615 | 1.294678153  | 0.226314997 | 0.226314997 | -4.893921165 |
| 1422244_at   | -0.139606392 | 4.816710511 | -1.294657437 | 0.226321855 | 0.226321855 | -4.893942699 |
| 1433175_at   | -0.094018862 | 3.759854121 | -1.29459528  | 0.226342431 | 0.226342431 | -4.89400731  |
| 1431437_at   | 0.09170738   | 5.834226457 | 1.294445307  | 0.226392085 | 0.226392085 | -4.894163196 |
| 1420504_at   | 0.108442696  | 3.187247517 | 1.294287194  | 0.226444443 | 0.226444443 | -4.89432753  |
| 1421153_at   | -0.197868945 | 6.941358653 | -1.294135794 | 0.226494588 | 0.226494588 | -4.894484874 |
| 1440833_at   | 0.176264019  | 5.983053465 | 1.294058272  | 0.226520267 | 0.226520267 | -4.894565434 |
| 1435585_at   | -0.616529133 | 6.185537429 | -1.294036329 | 0.226527537 | 0.226527537 | -4.894588237 |
| 1420048_at   | 0.134013653  | 3.902902469 | 1.293926882  | 0.226563796 | 0.226563796 | -4.894701968 |
| 1444342_at   | 0.140087892  | 6.539065998 | 1.293910144  | 0.226569342 | 0.226569342 | -4.89471936  |
| 1421656_at   | -0.116315978 | 4.377421704 | -1.293845863 | 0.226590641 | 0.226590641 | -4.894786154 |
| 1459961_a_at | 0.123427574  | 6.754406944 | 1.293773733  | 0.226614543 | 0.226614543 | -4.8948611   |
| 1427142_s_at | -0.129247914 | 7.704173472 | -1.293618137 | 0.226666109 | 0.226666109 | -4.895022763 |
| 1415848_at   | -0.102137857 | 6.39115503  | -1.293563792 | 0.226684123 | 0.226684123 | -4.895079224 |
| 1424277_at   | 0.089451679  | 8.650978081 | 1.29355375   | 0.226687451 | 0.226687451 | -4.895089657 |
| 1443871_at   | 0.121042275  | 4.313651367 | 1.293507946  | 0.226702635 | 0.226702635 | -4.895137243 |
| 1423070_at   | 0.114830463  | 6.423822937 | 1.293444783  | 0.226723573 | 0.226723573 | -4.895202862 |
| 1439738_at   | -0.085100528 | 6.072712375 | -1.293443223 | 0.226724091 | 0.226724091 | -4.895204482 |
| 1437920_at   | -0.11838214  | 5.343745909 | -1.293401091 | 0.226738058 | 0.226738058 | -4.89524825  |
| 1448201_at   | -0.093249286 | 12.87768038 | -1.293347721 | 0.226755753 | 0.226755753 | -4.895303693 |
| 1417626_at   | -0.257071932 | 6.188375892 | -1.293295967 | 0.226772913 | 0.226772913 | -4.895357455 |
| 1460097_at   | -0.085044946 | 4.25674635  | -1.293282522 | 0.226777371 | 0.226777371 | -4.895371421 |
| 1436633_at   | -0.137162213 | 4.195614425 | -1.293221268 | 0.226797682 | 0.226797682 | -4.895435049 |
| 1445133_at   | 0.143552716  | 3.446505293 | 1.293219042  | 0.22679842  | 0.22679842  | -4.895437361 |
| 1448511_at   | -0.093742358 | 6.6765873   | -1.293049056 | 0.226854795 | 0.226854795 | -4.895613924 |
| 1434356_a_at | 0.109783206  | 11.50192991 | 1.293028049  | 0.226861762 | 0.226861762 | -4.895635743 |
| 1449930_a_at | -0.107801526 | 10.35518275 | -1.292933832 | 0.226893014 | 0.226893014 | -4.895733598 |
| 1434795_at   | -0.135500087 | 7.432981549 | -1.292931604 | 0.226893754 | 0.226893754 | -4.895735913 |
| 1457401_at   | -0.157597845 | 4.598491227 | -1.292903058 | 0.226903223 | 0.226903223 | -4.89576556  |
| 1447011_at   | -0.090479535 | 3.941710517 | -1.292888161 | 0.226908165 | 0.226908165 | -4.895781031 |
| 1421857_at   | 0.094307243  | 7.556671112 | 1.292867037  | 0.226915173 | 0.226915173 | -4.89580297  |
| 1419485_at   | 0.232604243  | 6.831068746 | 1.292817375  | 0.226931648 | 0.226931648 | -4.895854546 |
| 1456170_x_at | -0.095394575 | 12.16040017 | -1.292764829 | 0.226949082 | 0.226949082 | -4.895909116 |
| 1432101_a_at | -0.103652095 | 4.412867908 | -1.292744685 | 0.226955766 | 0.226955766 | -4.895930036 |
| 1422284_at   | -0.091188721 | 6.492080009 | -1.292638151 | 0.226991116 | 0.226991116 | -4.896040667 |
| 1451694_at   | -0.137203631 | 4.609723827 | -1.292499519 | 0.227037124 | 0.227037124 | -4.896184622 |
| 1451412_a_at | -0.093365013 | 9.040098507 | -1.292463373 | 0.227049121 | 0.227049121 | -4.896222154 |
| 1451449_at   | -0.09274033  | 8.977341706 | -1.292369904 | 0.227080146 | 0.227080146 | -4.896319205 |
| 1457720_at   | 0.081550303  | 3.953555962 | 1.292331642  | 0.227092847 | 0.227092847 | -4.896358932 |
| 1429060_at   | 0.288828348  | 9.845742762 | 1.292322848  | 0.227095766 | 0.227095766 | -4.896368062 |



|              |              |             |              |             |             |              |
|--------------|--------------|-------------|--------------|-------------|-------------|--------------|
| 1448905_at   | 0.100752083  | 8.016543997 | 1.292322351  | 0.227095931 | 0.227095931 | -4.896368578 |
| 1447102_at   | -0.100245386 | 3.991470907 | -1.292302094 | 0.227102656 | 0.227102656 | -4.89638961  |
| 1425008_a_at | 0.128276417  | 3.674766587 | 1.292214456  | 0.227131751 | 0.227131751 | -4.896480599 |
| 1446991_at   | 0.170804843  | 5.585547747 | 1.291976159  | 0.22721088  | 0.22721088  | -4.896727987 |
| 1456383_at   | 0.078434829  | 10.03546874 | 1.291962586  | 0.227215388 | 0.227215388 | -4.896742076 |
| 1448541_at   | 0.103147614  | 8.338504009 | 1.291954565  | 0.227218052 | 0.227218052 | -4.896750403 |
| 1450140_a_at | -0.08871167  | 3.983687914 | -1.29190044  | 0.227236028 | 0.227236028 | -4.896806588 |
| 1425695_at   | -0.086884836 | 5.266834573 | -1.29183566  | 0.227257545 | 0.227257545 | -4.896873832 |
| 1450501_at   | 0.112565409  | 5.950162019 | 1.291752443  | 0.227285188 | 0.227285188 | -4.89696021  |
| 1415696_at   | -0.093477997 | 10.94625228 | -1.291537879 | 0.227356475 | 0.227356475 | -4.897182908 |
| 1433015_at   | 0.162977855  | 4.337235275 | 1.291506999  | 0.227366736 | 0.227366736 | -4.897214957 |
| 1421489_a_at | -0.099855172 | 3.254010525 | -1.291456139 | 0.227383638 | 0.227383638 | -4.897267741 |
| 1458596_at   | -0.136765374 | 6.15350836  | -1.291433241 | 0.227391247 | 0.227391247 | -4.897291505 |
| 1441946_at   | -0.171733096 | 4.252429708 | -1.291341496 | 0.227421738 | 0.227421738 | -4.897386716 |
| 1426298_at   | 0.425228242  | 5.819971213 | 1.291192446  | 0.227471281 | 0.227471281 | -4.897541386 |
| 1439068_at   | -0.140108845 | 4.032033542 | -1.291134856 | 0.227490426 | 0.227490426 | -4.897601145 |
| 1442786_s_at | 0.23170746   | 7.804052454 | 1.291122311  | 0.227494597 | 0.227494597 | -4.897614162 |
| 1457019_s_at | 0.11491554   | 6.29916405  | 1.291115927  | 0.22749672  | 0.22749672  | -4.897620787 |
| 1431939_a_at | 0.086816949  | 6.425902398 | 1.291097266  | 0.227502923 | 0.227502923 | -4.89764015  |
| 1447838_x_at | -0.157015006 | 5.366919516 | -1.290954796 | 0.227550294 | 0.227550294 | -4.897787975 |
| 1422983_at   | 0.092473423  | 4.016511875 | 1.290896195  | 0.22756978  | 0.22756978  | -4.897848775 |
| 1425437_a_at | -0.093412834 | 5.260182301 | -1.290869433 | 0.22757868  | 0.22757868  | -4.897876541 |
| 1430957_at   | -0.113204497 | 4.153562763 | -1.290796767 | 0.227602846 | 0.227602846 | -4.897951931 |
| 1446458_at   | 0.109817788  | 4.024576541 | 1.290540574  | 0.227688065 | 0.227688065 | -4.898217705 |
| 1430971_a_at | 0.170961101  | 4.940732154 | 1.290463251  | 0.227713791 | 0.227713791 | -4.898297912 |
| 1451077_at   | 0.127010012  | 8.662817321 | 1.29035817   | 0.227748755 | 0.227748755 | -4.898406909 |
| 1439353_x_at | -0.086296367 | 3.274066793 | -1.290015988 | 0.227862644 | 0.227862644 | -4.898761801 |
| 1444147_at   | 0.11523147   | 3.143124503 | 1.289895558  | 0.227902737 | 0.227902737 | -4.89888669  |
| 1439848_at   | -0.096380397 | 4.309167843 | -1.289867265 | 0.227912158 | 0.227912158 | -4.898916029 |
| 1456513_at   | 0.110789275  | 4.356343986 | 1.289823805  | 0.227926628 | 0.227926628 | -4.898961095 |
| 1428018_a_at | -0.097500432 | 5.870822472 | -1.289770326 | 0.227944436 | 0.227944436 | -4.89901655  |
| 1421096_at   | 0.113504847  | 6.686096556 | 1.289704532  | 0.227966346 | 0.227966346 | -4.899084772 |
| 1444163_at   | -0.101703747 | 3.736357553 | -1.289696569 | 0.227968998 | 0.227968998 | -4.899093029 |
| 1418429_at   | 0.232423559  | 9.597224865 | 1.289682647  | 0.227973635 | 0.227973635 | -4.899107465 |
| 1433482_a_at | -0.087358167 | 9.235147851 | -1.289606602 | 0.227998962 | 0.227998962 | -4.899186312 |
| 1425586_a_at | 0.088737442  | 4.011073148 | 1.289537403  | 0.22802201  | 0.22802201  | -4.899258059 |
| 1420360_at   | 0.215056622  | 7.961188771 | 1.289476232  | 0.228042387 | 0.228042387 | -4.89932148  |
| 1455576_at   | -0.142959639 | 4.974576394 | -1.289474627 | 0.228042921 | 0.228042921 | -4.899323144 |
| 1445717_at   | 0.21776955   | 6.567699433 | 1.289462894  | 0.22804683  | 0.22804683  | -4.899335309 |
| 1417579_x_at | -0.098441983 | 7.943440173 | -1.289419429 | 0.228061309 | 0.228061309 | -4.899380371 |
| 1425313_at   | -0.10990288  | 4.241101864 | -1.289191844 | 0.228137137 | 0.228137137 | -4.899616303 |
| 1442549_at   | 0.179388711  | 7.709117963 | 1.289165475  | 0.228145924 | 0.228145924 | -4.899643638 |
| 1432393_a_at | 0.674970213  | 6.699051937 | 1.289130676  | 0.228157521 | 0.228157521 | -4.89967971  |
| 1422236_at   | -0.097635364 | 3.655990564 | -1.289103216 | 0.228166672 | 0.228166672 | -4.899708175 |
| 1447901_x_at | -0.186291001 | 6.566671099 | -1.289054848 | 0.228182792 | 0.228182792 | -4.899758311 |
| 1439335_at   | 0.084283178  | 3.509218191 | 1.289016993  | 0.228195409 | 0.228195409 | -4.89979755  |
| 1416569_at   | 0.089392675  | 8.946267807 | 1.289002816  | 0.228200135 | 0.228200135 | -4.899812244 |
| 1416865_at   | -0.219220948 | 8.27881036  | -1.288999147 | 0.228201358 | 0.228201358 | -4.899816048 |
| 1443889_at   | -0.106909503 | 4.038688657 | -1.2889711   | 0.228210706 | 0.228210706 | -4.899845118 |
| 1426056_at   | -0.08101076  | 4.153133444 | -1.288876006 | 0.228242405 | 0.228242405 | -4.899943681 |
| 1446943_at   | -0.103552204 | 5.561905923 | -1.288843926 | 0.228253099 | 0.228253099 | -4.899976931 |
| 1427245_at   | -0.107972883 | 9.543032683 | -1.288531832 | 0.228357162 | 0.228357162 | -4.90030037  |
| 1428048_at   | -0.134551952 | 5.970169706 | -1.288497015 | 0.228368774 | 0.228368774 | -4.900336449 |

|              |              |             |              |             |             |              |
|--------------|--------------|-------------|--------------|-------------|-------------|--------------|
| 1426627_at   | 0.147349005  | 6.758608203 | 1.288116454  | 0.228495724 | 0.228495724 | -4.900730768 |
| 1423249_at   | 0.269720382  | 9.371915445 | 1.288093326  | 0.228503442 | 0.228503442 | -4.90075473  |
| 1458230_at   | -0.154444538 | 4.691292863 | -1.288065553 | 0.228512709 | 0.228512709 | -4.900783504 |
| 1420521_at   | 0.136535826  | 4.984329229 | 1.287987179  | 0.228538863 | 0.228538863 | -4.900864699 |
| 1459382_at   | -0.096369809 | 4.386628009 | -1.287968694 | 0.228545031 | 0.228545031 | -4.900883849 |
| 1420635_a_at | -0.086325994 | 7.712973096 | -1.287946014 | 0.2285526   | 0.2285526   | -4.900907345 |
| 1459156_at   | -0.118376322 | 3.214637565 | -1.287820314 | 0.228594554 | 0.228594554 | -4.901037561 |
| 1436404_at   | -0.078472713 | 6.405058989 | -1.28777208  | 0.228610654 | 0.228610654 | -4.901087525 |
| 1448031_at   | -0.136512221 | 5.919371167 | -1.287760004 | 0.228614686 | 0.228614686 | -4.901100035 |
| 1451439_at   | 0.090016856  | 7.029719862 | 1.287469176  | 0.228711784 | 0.228711784 | -4.901401271 |
| 1422070_at   | -0.084950664 | 4.135669342 | -1.287413941 | 0.228730229 | 0.228730229 | -4.901458477 |
| 1439908_at   | 0.185564815  | 5.411563819 | 1.287178033  | 0.228809022 | 0.228809022 | -4.901702788 |
| 1425320_at   | 0.209998374  | 4.77313945  | 1.287074562  | 0.228843588 | 0.228843588 | -4.901809935 |
| 1455453_at   | -0.112561962 | 7.092946056 | -1.286989822 | 0.2288719   | 0.2288719   | -4.901897681 |
| 1440263_at   | 0.088739886  | 8.162543946 | 1.28696975   | 0.228878607 | 0.228878607 | -4.901918465 |
| 1439222_at   | 0.155527528  | 4.180752742 | 1.286927507  | 0.228892721 | 0.228892721 | -4.901962204 |
| 1423147_at   | -0.145110955 | 3.734956304 | -1.286789728 | 0.228938764 | 0.228938764 | -4.902104859 |
| 1444683_at   | 0.092855086  | 5.157751951 | 1.286782674  | 0.228941121 | 0.228941121 | -4.902112163 |
| 1449028_at   | -0.11640722  | 7.493984608 | -1.286769781 | 0.22894543  | 0.22894543  | -4.902125511 |
| 1449712_s_at | 0.102438868  | 9.869777504 | 1.286666827  | 0.228979841 | 0.228979841 | -4.902232101 |
| 1431899_at   | -0.101105116 | 3.569635199 | -1.286588276 | 0.229006098 | 0.229006098 | -4.902313422 |
| 1430444_at   | -0.153456521 | 3.837523313 | -1.286582999 | 0.229007862 | 0.229007862 | -4.902318885 |
| 1425938_a_at | -0.105002403 | 6.031752025 | -1.286441882 | 0.229055039 | 0.229055039 | -4.90246497  |
| 1425941_a_at | 0.135159603  | 4.266693656 | 1.286441294  | 0.229055236 | 0.229055236 | -4.902465578 |
| 1420778_at   | -0.161609615 | 6.138037495 | -1.286404405 | 0.22906757  | 0.22906757  | -4.902503764 |
| 1419027_s_at | 0.136465683  | 9.789545516 | 1.286404282  | 0.229067611 | 0.229067611 | -4.902503891 |
| 1440701_at   | 0.104626153  | 5.66563146  | 1.286364612  | 0.229080875 | 0.229080875 | -4.902544956 |
| 1430992_s_at | 0.152569123  | 6.458794974 | 1.286342535  | 0.229088257 | 0.229088257 | -4.902567808 |
| 1442864_at   | -0.13255048  | 5.788117223 | -1.286260648 | 0.22911564  | 0.22911564  | -4.902652568 |
| 1428565_at   | 0.106205487  | 7.53380908  | 1.286257364  | 0.229116738 | 0.229116738 | -4.902655967 |
| 1425707_a_at | 0.124829225  | 3.883583121 | 1.286212442  | 0.229131762 | 0.229131762 | -4.902702464 |
| 1428865_at   | -0.210002162 | 8.418605586 | -1.286170956 | 0.229145636 | 0.229145636 | -4.902745404 |
| 1441625_at   | -0.131634796 | 5.154703508 | -1.286152605 | 0.229151774 | 0.229151774 | -4.902764397 |
| 1458071_at   | -0.187034812 | 4.487977279 | -1.286010754 | 0.229199222 | 0.229199222 | -4.90291121  |
| 1454769_at   | 0.145838553  | 6.553196807 | 1.285989576  | 0.229206306 | 0.229206306 | -4.902933127 |
| 1422824_s_at | 0.170729903  | 7.413545104 | 1.285819024  | 0.229263366 | 0.229263366 | -4.903109629 |
| 1438565_at   | 0.12931472   | 6.056854423 | 1.285775252  | 0.229278012 | 0.229278012 | -4.903154925 |
| 1460628_at   | 0.153420829  | 3.674050878 | 1.285699986  | 0.229303199 | 0.229303199 | -4.90323281  |
| 1435350_at   | 0.109203578  | 7.104399363 | 1.285652618  | 0.229319051 | 0.229319051 | -4.903281825 |
| 1429364_at   | 0.093705288  | 9.105359192 | 1.285327473  | 0.229427886 | 0.229427886 | -4.90361824  |
| 1437241_at   | -0.098399124 | 7.523396089 | -1.285189786 | 0.229473986 | 0.229473986 | -4.903760682 |
| 1438531_at   | 0.148033347  | 10.19976522 | 1.285176715  | 0.229478363 | 0.229478363 | -4.903774205 |
| 1453764_at   | 0.102492214  | 4.420372055 | 1.285155859  | 0.229485347 | 0.229485347 | -4.90379578  |
| 1448124_at   | -0.099315035 | 8.810180364 | -1.285126313 | 0.229495241 | 0.229495241 | -4.903826344 |
| 1456797_at   | 0.153905119  | 4.303213417 | 1.285106888  | 0.229501746 | 0.229501746 | -4.903846439 |
| 1437496_at   | 0.105964008  | 4.723716282 | 1.284944797  | 0.229556033 | 0.229556033 | -4.904014108 |
| 1418869_a_at | 0.090674452  | 8.228354163 | 1.284910633  | 0.229567476 | 0.229567476 | -4.904049446 |
| 1423099_a_at | 0.097174008  | 8.703173868 | 1.284821164  | 0.229597447 | 0.229597447 | -4.904141987 |
| 1442190_at   | 0.117004746  | 3.056241997 | 1.284720003  | 0.229631338 | 0.229631338 | -4.904246617 |
| 1436852_at   | 0.135818534  | 6.429714948 | 1.284682795  | 0.229643804 | 0.229643804 | -4.904285098 |
| 1420742_at   | 0.095728498  | 4.12147211  | 1.284682695  | 0.229643838 | 0.229643838 | -4.904285202 |
| 1440852_at   | -0.174008001 | 3.910480028 | -1.284626133 | 0.22966279  | 0.22966279  | -4.9043437   |
| 1453541_at   | -0.093679967 | 6.411818261 | -1.284537261 | 0.229692571 | 0.229692571 | -4.904435609 |

|              |              |             |              |             |             |              |
|--------------|--------------|-------------|--------------|-------------|-------------|--------------|
| 1458157_at   | 0.098031386  | 3.895444077 | 1.284443864  | 0.229723871 | 0.229723871 | -4.904532194 |
| 1457579_at   | 0.131920209  | 6.45730653  | 1.284436754  | 0.229726254 | 0.229726254 | -4.904539546 |
| 1419384_at   | 0.093375097  | 7.726315925 | 1.284425432  | 0.229730049 | 0.229730049 | -4.904551254 |
| 1434845_at   | -0.093907402 | 7.603188175 | -1.284348705 | 0.229755766 | 0.229755766 | -4.904630596 |
| 1459293_at   | -0.160036853 | 5.406706953 | -1.284155737 | 0.229820454 | 0.229820454 | -4.904830126 |
| 1431993_a_at | -0.214052949 | 5.769955299 | -1.284117495 | 0.229833276 | 0.229833276 | -4.904869667 |
| 1454394_at   | 0.096013714  | 3.894859375 | 1.284011265  | 0.229868896 | 0.229868896 | -4.904979499 |
| 1439926_at   | 0.128480402  | 6.217255296 | 1.283964493  | 0.22988458  | 0.22988458  | -4.905027855 |
| 1417652_a_at | 0.083489507  | 11.90012908 | 1.283952059  | 0.22988875  | 0.22988875  | -4.905040709 |
| 1451445_at   | 0.097376297  | 5.240813429 | 1.283803476  | 0.229938582 | 0.229938582 | -4.905194316 |
| 1452513_a_at | -0.143291708 | 4.754749387 | -1.283727773 | 0.229963974 | 0.229963974 | -4.905272573 |
| 1435858_at   | -0.117948726 | 3.28117566  | -1.283727016 | 0.229964229 | 0.229964229 | -4.905273356 |
| 1426867_at   | 0.157448897  | 7.995825919 | 1.283661691  | 0.229986142 | 0.229986142 | -4.905340883 |
| 1455930_at   | 0.181289859  | 6.346820613 | 1.283581109  | 0.230013176 | 0.230013176 | -4.905424178 |
| 1428021_at   | -0.142077804 | 6.216056952 | -1.283572535 | 0.230016053 | 0.230016053 | -4.905433041 |
| 1419541_at   | -0.123897168 | 4.207675646 | -1.283412571 | 0.230069727 | 0.230069727 | -4.90559838  |
| 1425221_at   | -0.393687061 | 5.407595468 | -1.283379838 | 0.230080711 | 0.230080711 | -4.905632212 |
| 1453807_at   | -0.106452637 | 3.288824318 | -1.283307522 | 0.23010498  | 0.23010498  | -4.905706952 |
| 1441004_at   | 0.139712143  | 5.11786148  | 1.283304225  | 0.230106087 | 0.230106087 | -4.90571036  |
| 1421045_at   | -0.164628249 | 8.63323938  | -1.283227167 | 0.23013195  | 0.23013195  | -4.905789998 |
| 1429275_at   | -0.099867528 | 4.878976981 | -1.283164217 | 0.23015308  | 0.23015308  | -4.905855053 |
| 1429041_at   | -0.142547814 | 8.308322147 | -1.28315723  | 0.230155425 | 0.230155425 | -4.905862273 |
| 1449782_at   | 0.156420008  | 4.655499907 | 1.283081906  | 0.23018071  | 0.23018071  | -4.905940114 |
| 1443519_at   | -0.111527142 | 4.128515303 | -1.283042952 | 0.230193788 | 0.230193788 | -4.905980368 |
| 1422971_at   | -0.124251849 | 7.167442927 | -1.283028489 | 0.230198643 | 0.230198643 | -4.905995314 |
| 1427348_at   | -0.118914702 | 4.177002302 | -1.283026828 | 0.230199201 | 0.230199201 | -4.90599703  |
| 1437037_x_at | -0.115244599 | 4.450054981 | -1.283026704 | 0.230199242 | 0.230199242 | -4.905997158 |
| 1428228_at   | -0.098790959 | 8.146234009 | -1.282917171 | 0.230236018 | 0.230236018 | -4.906110342 |
| 1453573_at   | -0.086212956 | 5.61881248  | -1.282768862 | 0.230285821 | 0.230285821 | -4.906263584 |
| 1453167_at   | -0.104895243 | 3.635807308 | -1.282695858 | 0.230310339 | 0.230310339 | -4.906339011 |
| 1456515_s_at | -0.142202802 | 4.811833792 | -1.282684022 | 0.230314314 | 0.230314314 | -4.90635124  |
| 1431837_at   | -0.116347051 | 4.395063668 | -1.282666895 | 0.230320066 | 0.230320066 | -4.906368935 |
| 1424383_at   | -0.114198712 | 7.347268041 | -1.282656027 | 0.230323717 | 0.230323717 | -4.906380164 |
| 1447925_at   | 0.101549419  | 3.491180453 | 1.28245311   | 0.23039188  | 0.23039188  | -4.906589798 |
| 1435158_at   | 0.161627655  | 5.899302985 | 1.28237054   | 0.230419622 | 0.230419622 | -4.906675095 |
| 1439113_at   | 0.325240826  | 6.54610135  | 1.282352118  | 0.230425811 | 0.230425811 | -4.906694125 |
| 1452603_at   | -0.161379528 | 8.92036549  | -1.282284479 | 0.230448539 | 0.230448539 | -4.906763995 |
| 1416590_a_at | 0.084977504  | 10.18091587 | 1.282204578  | 0.230475389 | 0.230475389 | -4.906846528 |
| 1446509_at   | 0.148590059  | 4.154396078 | 1.281912545  | 0.230573547 | 0.230573547 | -4.907148152 |
| 1437319_at   | -0.089718607 | 3.591185529 | -1.28156773  | 0.230689491 | 0.230689491 | -4.907504233 |
| 1437079_at   | 0.149842731  | 5.383389914 | 1.281487143  | 0.230716595 | 0.230716595 | -4.907587445 |
| 1456557_at   | -0.253103198 | 5.393620277 | -1.2814858   | 0.230717047 | 0.230717047 | -4.907588831 |
| 1424246_a_at | 0.088297955  | 8.990361466 | 1.281443574  | 0.23073125  | 0.23073125  | -4.907632431 |
| 1455025_at   | 0.123714501  | 4.083945524 | 1.281410451  | 0.230742392 | 0.230742392 | -4.90766663  |
| 1437498_at   | -0.102898802 | 3.810213821 | -1.281228694 | 0.230803538 | 0.230803538 | -4.907854285 |
| 1456849_at   | -0.182622177 | 7.367250625 | -1.28106179  | 0.2308597   | 0.2308597   | -4.90802659  |
| 1426002_a_at | 0.115145867  | 9.256086251 | 1.280981489  | 0.230886724 | 0.230886724 | -4.908109484 |
| 1459044_at   | -0.122271165 | 4.028188188 | -1.280874493 | 0.230922737 | 0.230922737 | -4.908219929 |
| 1416028_a_at | 0.101997381  | 10.06106074 | 1.280848472  | 0.230931496 | 0.230931496 | -4.908246789 |
| 1427408_a_at | 0.098106324  | 8.02457579  | 1.280636008  | 0.231003023 | 0.231003023 | -4.908466082 |
| 1417678_at   | -0.080291445 | 5.100445809 | -1.280601029 | 0.2310148   | 0.2310148   | -4.908502183 |
| 1448981_x_at | -0.095381022 | 6.334505597 | -1.280529259 | 0.231038967 | 0.231038967 | -4.908576253 |
| 1454926_at   | 0.191191678  | 4.58064863  | 1.28051776   | 0.231042839 | 0.231042839 | -4.90858812  |

|              |              |             |              |             |             |              |
|--------------|--------------|-------------|--------------|-------------|-------------|--------------|
| 1424673_at   | -0.133087248 | 3.171831009 | -1.28051773  | 0.231042849 | 0.231042849 | -4.908588151 |
| 1426552_a_at | 0.165127474  | 6.354417284 | 1.280508367  | 0.231046002 | 0.231046002 | -4.908597814 |
| 1429395_at   | -0.18579235  | 8.247459751 | -1.280490421 | 0.231052046 | 0.231052046 | -4.908616334 |
| 1445754_at   | -0.129888952 | 4.270562571 | -1.280481766 | 0.23105496  | 0.23105496  | -4.908625266 |
| 1434136_at   | 0.102280683  | 3.619795635 | 1.280479301  | 0.23105579  | 0.23105579  | -4.90862781  |
| 1449357_at   | 0.279515087  | 6.259923665 | 1.280459673  | 0.2310624   | 0.2310624   | -4.908648066 |
| 1439904_at   | 0.13115678   | 3.767746034 | 1.28045168   | 0.231065092 | 0.231065092 | -4.908656315 |
| 1433206_at   | 0.157910447  | 3.729552544 | 1.280301218  | 0.231115768 | 0.231115768 | -4.908811584 |
| 1458685_at   | 0.241564796  | 4.985434145 | 1.280283199  | 0.231121838 | 0.231121838 | -4.908830178 |
| 1434235_at   | -0.086187412 | 8.512683298 | -1.280146484 | 0.231167893 | 0.231167893 | -4.908971249 |
| 1427533_at   | 0.105792383  | 5.166306861 | 1.280126923  | 0.231174483 | 0.231174483 | -4.908991433 |
| 1435204_at   | -0.117700507 | 5.228258216 | -1.280002121 | 0.231216532 | 0.231216532 | -4.9091202   |
| 1430242_at   | 0.085536518  | 4.9061045   | 1.279842031  | 0.23127048  | 0.23127048  | -4.909285367 |
| 1417090_at   | -0.092153404 | 10.73399996 | -1.279798225 | 0.231285244 | 0.231285244 | -4.909330559 |
| 1443472_at   | 0.131807624  | 4.864946394 | 1.279782989  | 0.231290379 | 0.231290379 | -4.909346277 |
| 1424179_at   | -0.139521848 | 6.729973984 | -1.279780321 | 0.231291279 | 0.231291279 | -4.909349029 |
| 1428393_at   | -0.151150736 | 5.79762692  | -1.279731    | 0.231307903 | 0.231307903 | -4.90939991  |
| 1453835_at   | -0.150142073 | 4.446050981 | -1.279678253 | 0.231325682 | 0.231325682 | -4.909454324 |
| 1451460_a_at | -0.088062752 | 5.121337125 | -1.279644377 | 0.231337102 | 0.231337102 | -4.909489269 |
| 1452161_at   | 0.175038849  | 7.925999039 | 1.279554227  | 0.231367493 | 0.231367493 | -4.909582262 |
| 1436741_at   | -0.090574991 | 3.894256405 | -1.279487037 | 0.231390146 | 0.231390146 | -4.909651567 |
| 1424463_at   | 0.171246545  | 7.162656155 | 1.279326031  | 0.231444437 | 0.231444437 | -4.909817635 |
| 1445798_at   | 0.156300079  | 5.736616622 | 1.279312902  | 0.231448864 | 0.231448864 | -4.909831175 |
| 1427912_at   | -0.146172816 | 7.624614487 | -1.279228017 | 0.231477492 | 0.231477492 | -4.909918722 |
| 1445566_at   | 0.103272434  | 4.591890424 | 1.279144622  | 0.23150562  | 0.23150562  | -4.910004729 |
| 1459258_at   | -0.167119505 | 5.587559134 | -1.278969812 | 0.23156459  | 0.23156459  | -4.910185001 |
| 1438722_at   | 0.106406122  | 5.522780294 | 1.278957477  | 0.231568751 | 0.231568751 | -4.910197721 |
| 1442761_at   | 0.137741949  | 7.601915823 | 1.278876004  | 0.23159624  | 0.23159624  | -4.910281734 |
| 1444132_at   | -0.121391441 | 5.396889717 | -1.27877694  | 0.231629667 | 0.231629667 | -4.91038388  |
| 1418588_at   | 0.278899631  | 4.369629329 | 1.278653528  | 0.231671316 | 0.231671316 | -4.910511126 |
| 1416804_at   | 0.188823606  | 6.029459326 | 1.278564966  | 0.231701208 | 0.231701208 | -4.910602434 |
| 1428959_at   | -0.141848586 | 3.887793903 | -1.278344308 | 0.231775698 | 0.231775698 | -4.910829915 |
| 1442066_at   | -0.15142973  | 5.950412671 | -1.278327115 | 0.231781503 | 0.231781503 | -4.91084764  |
| 1425251_at   | 0.08543914   | 4.009502869 | 1.278293785  | 0.231792757 | 0.231792757 | -4.910881997 |
| 1460538_at   | 0.104823454  | 5.65576825  | 1.278229438  | 0.231814484 | 0.231814484 | -4.910948328 |
| 1418977_at   | 0.093648254  | 6.326889609 | 1.278019087  | 0.231885524 | 0.231885524 | -4.911165146 |
| 1446860_at   | 0.108629416  | 5.753298112 | 1.278008297  | 0.231889168 | 0.231889168 | -4.911176268 |
| 1446603_at   | -0.1246551   | 3.827335815 | -1.277988009 | 0.231896021 | 0.231896021 | -4.911197178 |
| 1432170_at   | -0.131470304 | 3.909672104 | -1.277972972 | 0.2319011   | 0.2319011   | -4.911212676 |
| 1423275_at   | -0.083118824 | 8.193052619 | -1.277923367 | 0.231917856 | 0.231917856 | -4.911263803 |
| 1420103_at   | 0.092465032  | 6.621185621 | 1.277856848  | 0.231940327 | 0.231940327 | -4.911332358 |
| 1457110_at   | -0.122029443 | 5.459073161 | -1.27773565  | 0.231981274 | 0.231981274 | -4.911457262 |
| 1451276_at   | -0.115204558 | 7.90422798  | -1.277709432 | 0.231990133 | 0.231990133 | -4.91148428  |
| 1419773_at   | -0.107886007 | 3.700164819 | -1.277690385 | 0.231996568 | 0.231996568 | -4.911503908 |
| 1446748_at   | -0.327461178 | 5.906176005 | -1.277678951 | 0.232000432 | 0.232000432 | -4.911515691 |
| 1455599_at   | -0.095853804 | 7.258768945 | -1.277649888 | 0.232010253 | 0.232010253 | -4.911545641 |
| 1439391_at   | -0.126178166 | 5.046770577 | -1.277592087 | 0.232029785 | 0.232029785 | -4.911605203 |
| 1444464_at   | 0.136648342  | 4.435631762 | 1.277557628  | 0.23204143  | 0.23204143  | -4.911640712 |
| 1422580_at   | -0.669320323 | 8.492752376 | -1.277537946 | 0.232048082 | 0.232048082 | -4.911660994 |
| 1440043_at   | 0.101440992  | 3.842867164 | 1.277374947  | 0.232103174 | 0.232103174 | -4.911828947 |
| 1438591_at   | 0.090296353  | 6.499766542 | 1.277345719  | 0.232113054 | 0.232113054 | -4.911859061 |
| 1446483_at   | -0.163450169 | 5.169057549 | -1.277302816 | 0.232127557 | 0.232127557 | -4.911903265 |
| 1430341_at   | -0.093782545 | 7.589683034 | -1.27727289  | 0.232137673 | 0.232137673 | -4.911934097 |

|              |              |             |              |             |             |              |
|--------------|--------------|-------------|--------------|-------------|-------------|--------------|
| 1458914_at   | 0.125139515  | 4.250914889 | 1.277195684  | 0.232163775 | 0.232163775 | -4.912013641 |
| 1452648_at   | -0.109610689 | 10.89875742 | -1.277185376 | 0.23216726  | 0.23216726  | -4.912024261 |
| 1429890_at   | 0.123317726  | 6.719280749 | 1.277182177  | 0.232168342 | 0.232168342 | -4.912027556 |
| 1427634_at   | 0.176849221  | 5.078734363 | 1.277093858  | 0.232198204 | 0.232198204 | -4.912118545 |
| 1443971_x_at | -0.118709053 | 3.884561269 | -1.27704413  | 0.23221502  | 0.23221502  | -4.912169774 |
| 1420333_at   | -0.085468501 | 4.480212257 | -1.276980386 | 0.232236576 | 0.232236576 | -4.91223544  |
| 1437187_at   | -0.107162816 | 8.522385271 | -1.276832061 | 0.232286742 | 0.232286742 | -4.91238823  |
| 1437882_s_at | -0.105950688 | 5.999320611 | -1.276759799 | 0.232311185 | 0.232311185 | -4.912462662 |
| 1427503_at   | -0.137638149 | 5.477400256 | -1.276715844 | 0.232326054 | 0.232326054 | -4.912507936 |
| 1431677_at   | 0.201053803  | 6.956902329 | 1.276685104  | 0.232336453 | 0.232336453 | -4.912539598 |
| 1447840_x_at | 0.10767042   | 4.489713968 | 1.276658732  | 0.232345375 | 0.232345375 | -4.91256676  |
| 1445355_at   | 0.092273213  | 3.239550051 | 1.276535968  | 0.232386911 | 0.232386911 | -4.9126932   |
| 1421053_at   | -0.108130859 | 4.957934999 | -1.276447459 | 0.232416861 | 0.232416861 | -4.912784353 |
| 1444570_at   | -0.123698981 | 5.638595338 | -1.276335601 | 0.232454716 | 0.232454716 | -4.912899546 |
| 1430825_at   | -0.109961896 | 4.022908418 | -1.276229947 | 0.232490477 | 0.232490477 | -4.913008345 |
| 1454062_at   | 0.091024293  | 4.084359219 | 1.276155913  | 0.232515538 | 0.232515538 | -4.913084579 |
| 1442491_at   | 0.122672915  | 3.648923542 | 1.276008047  | 0.232565598 | 0.232565598 | -4.913236831 |
| 1431681_at   | -0.157795037 | 4.926340443 | -1.275990399 | 0.232571573 | 0.232571573 | -4.913255001 |
| 1422892_s_at | -0.093477457 | 3.760336495 | -1.27592908  | 0.232592336 | 0.232592336 | -4.913318135 |
| 1443368_at   | -0.156505636 | 4.666837318 | -1.275844842 | 0.232620861 | 0.232620861 | -4.913404863 |
| 1444338_at   | -0.093903098 | 3.735509031 | -1.275835143 | 0.232624146 | 0.232624146 | -4.913414848 |
| 1459439_at   | -0.101220684 | 5.891847749 | -1.27570549  | 0.232668056 | 0.232668056 | -4.913548325 |
| 1428798_s_at | 0.119436927  | 6.652418964 | 1.275687525  | 0.232674141 | 0.232674141 | -4.913566819 |
| 1437638_at   | 0.100002848  | 8.59958645  | 1.275622772  | 0.232696074 | 0.232696074 | -4.913633478 |
| 1439038_at   | 0.118870342  | 7.229877288 | 1.27558488   | 0.23270891  | 0.23270891  | -4.913672484 |
| 1429371_at   | 0.201915759  | 7.324804222 | 1.275521272  | 0.232730458 | 0.232730458 | -4.913737961 |
| 1430603_at   | -0.096937217 | 3.366025061 | -1.27546447  | 0.232749702 | 0.232749702 | -4.913796429 |
| 1458185_at   | -0.088075053 | 6.029076689 | -1.275415042 | 0.232766449 | 0.232766449 | -4.913847306 |
| 1433194_at   | -0.087438042 | 4.038543221 | -1.275385604 | 0.232776423 | 0.232776423 | -4.913877606 |
| 1452189_at   | 0.084765758  | 10.62290219 | 1.275364063  | 0.232783722 | 0.232783722 | -4.913899778 |
| 1444130_at   | -0.114120811 | 8.841454956 | -1.274905205 | 0.232939246 | 0.232939246 | -4.914372013 |
| 1452813_a_at | 0.11366386   | 10.20982934 | 1.274901131  | 0.232940627 | 0.232940627 | -4.914376205 |
| 1418462_at   | 0.128897062  | 8.621173404 | 1.27482405   | 0.232966761 | 0.232966761 | -4.914455522 |
| 1440830_at   | 0.117184286  | 7.207749674 | 1.274822878  | 0.232967158 | 0.232967158 | -4.914456727 |
| 1454633_at   | 0.090485859  | 8.247882538 | 1.274721143  | 0.233001655 | 0.233001655 | -4.914561409 |
| 1456123_at   | 0.133980677  | 3.07406959  | 1.274648656  | 0.233026237 | 0.233026237 | -4.914635991 |
| 1432581_at   | -0.132788357 | 3.896379394 | -1.274629873 | 0.233032607 | 0.233032607 | -4.914655317 |
| 1457909_at   | 0.0994253    | 4.842874436 | 1.274603138  | 0.233041674 | 0.233041674 | -4.914682824 |
| 1455167_at   | -0.104593827 | 7.487489004 | -1.274557297 | 0.233057221 | 0.233057221 | -4.914729988 |
| 1425177_at   | 0.127378431  | 8.18409209  | 1.274548221  | 0.2330603   | 0.2330603   | -4.914739326 |
| 1432652_at   | 0.099468326  | 3.383987481 | 1.274409032  | 0.233107513 | 0.233107513 | -4.914882524 |
| 1442873_at   | -0.198602594 | 5.339715325 | -1.274380538 | 0.233117179 | 0.233117179 | -4.914911837 |
| 1442279_at   | -0.24245651  | 6.701753587 | -1.274362689 | 0.233123234 | 0.233123234 | -4.914930198 |
| 1449359_at   | 0.213353689  | 5.776817737 | 1.274340583  | 0.233130734 | 0.233130734 | -4.914952941 |
| 1450123_at   | -0.122408458 | 4.697071459 | -1.274308477 | 0.233141626 | 0.233141626 | -4.914985968 |
| 1430989_a_at | 0.11403954   | 6.959152084 | 1.274302775  | 0.233143561 | 0.233143561 | -4.914991833 |
| 1457543_at   | -0.220115189 | 4.838118823 | -1.274286449 | 0.2331491   | 0.2331491   | -4.915008628 |
| 1429042_at   | -0.109303215 | 7.517789777 | -1.274203242 | 0.233177332 | 0.233177332 | -4.915094221 |
| 1430249_at   | -0.106470128 | 4.946827475 | -1.274175517 | 0.23318674  | 0.23318674  | -4.91512274  |
| 1423480_at   | 0.11254355   | 7.401023519 | 1.274092221  | 0.233215006 | 0.233215006 | -4.91520842  |
| 1458451_at   | -0.101249689 | 5.449088887 | -1.274069589 | 0.233222686 | 0.233222686 | -4.9152317   |
| 1428734_at   | -0.09530446  | 6.466922336 | -1.274010428 | 0.233242764 | 0.233242764 | -4.91529255  |
| 1458735_at   | -0.083207464 | 3.534026214 | -1.273790986 | 0.233317252 | 0.233317252 | -4.915518245 |

|              |              |             |              |             |             |              |
|--------------|--------------|-------------|--------------|-------------|-------------|--------------|
| 1459307_at   | 0.10049382   | 8.253431719 | 1.273788184  | 0.233318203 | 0.233318203 | -4.915521126 |
| 1426987_at   | -0.112598881 | 6.787198951 | -1.273632371 | 0.233371104 | 0.233371104 | -4.915681362 |
| 1434259_at   | -0.097479981 | 5.1917047   | -1.273605129 | 0.233380354 | 0.233380354 | -4.915709376 |
| 1426110_a_at | -0.118467827 | 7.716920462 | -1.273496087 | 0.233417383 | 0.233417383 | -4.915821505 |
| 1452722_a_at | 0.194656478  | 7.168812868 | 1.273490692  | 0.233419215 | 0.233419215 | -4.915827053 |
| 1454706_at   | 0.082910715  | 8.497907872 | 1.27346227   | 0.233428867 | 0.233428867 | -4.915856278 |
| 1428330_at   | -0.090607472 | 7.112734491 | -1.273425899 | 0.23344122  | 0.23344122  | -4.915893676 |
| 1447750_x_at | 0.119474081  | 8.017160053 | 1.273400445  | 0.233449865 | 0.233449865 | -4.915919849 |
| 1456105_at   | 0.114542958  | 7.439527951 | 1.273399411  | 0.233450216 | 0.233450216 | -4.915920912 |
| 1459448_at   | -0.176934909 | 5.721329293 | -1.273389688 | 0.233453519 | 0.233453519 | -4.91593091  |
| 1447973_at   | -0.119398508 | 4.969641554 | -1.273298838 | 0.233484377 | 0.233484377 | -4.916024321 |
| 1457112_at   | 0.194839461  | 4.891937629 | 1.273218994  | 0.233511501 | 0.233511501 | -4.916106413 |
| 1420350_at   | -0.103798985 | 5.095442428 | -1.273160798 | 0.233531271 | 0.233531271 | -4.916166244 |
| 1434804_at   | 0.09327906   | 7.763103106 | 1.273111481  | 0.233548027 | 0.233548027 | -4.916216946 |
| 1437407_at   | -0.125275089 | 5.923193899 | -1.273020905 | 0.233578803 | 0.233578803 | -4.916310062 |
| 1449919_at   | 0.100117734  | 3.830496829 | 1.272990764  | 0.233589045 | 0.233589045 | -4.916341047 |
| 1439523_at   | -0.106970851 | 6.164295341 | -1.272940992 | 0.233605958 | 0.233605958 | -4.916392213 |
| 1453829_at   | 0.106787271  | 5.733117348 | 1.272834613  | 0.233642111 | 0.233642111 | -4.916501565 |
| 1425737_at   | 0.101158551  | 4.056399366 | 1.272790699  | 0.233657037 | 0.233657037 | -4.916546705 |
| 1437360_at   | -0.165247962 | 9.321396732 | -1.272790279 | 0.23365718  | 0.23365718  | -4.916547137 |
| 1452495_at   | 0.132487525  | 4.387159564 | 1.272761726  | 0.233666885 | 0.233666885 | -4.916576485 |
| 1421052_a_at | -0.09443263  | 9.543896848 | -1.272663051 | 0.233700427 | 0.233700427 | -4.916677909 |
| 1449434_at   | -0.156820769 | 11.02491583 | -1.272632151 | 0.233710931 | 0.233710931 | -4.916709669 |
| 1451639_at   | 0.095291751  | 7.6657272   | 1.272584108  | 0.233727264 | 0.233727264 | -4.916759047 |
| 1420413_at   | -0.093122707 | 3.98055793  | -1.272579965 | 0.233728673 | 0.233728673 | -4.916763306 |
| 1434940_x_at | 0.237469058  | 7.081442872 | 1.272455616  | 0.233770952 | 0.233770952 | -4.916891106 |
| 1432562_at   | 0.103189166  | 4.571999013 | 1.27241207   | 0.233785759 | 0.233785759 | -4.916935857 |
| 1437472_at   | -0.151399082 | 4.11800253  | -1.2723888   | 0.233793672 | 0.233793672 | -4.916959772 |
| 1420498_a_at | -0.114256927 | 10.83259617 | -1.272320328 | 0.233816957 | 0.233816957 | -4.917030138 |
| 1455864_at   | 0.117148187  | 3.602978749 | 1.272203485  | 0.233856697 | 0.233856697 | -4.917150207 |
| 1451866_a_at | 0.148636884  | 5.855205677 | 1.272043371  | 0.233911162 | 0.233911162 | -4.917314731 |
| 1451061_at   | -0.101107133 | 4.037552212 | -1.271993659 | 0.233928074 | 0.233928074 | -4.91736581  |
| 1447578_at   | -0.090323993 | 3.588411464 | -1.271902964 | 0.233958932 | 0.233958932 | -4.917458994 |
| 1423987_at   | 0.136927528  | 9.560076745 | 1.271866652  | 0.233971287 | 0.233971287 | -4.917496301 |
| 1421540_at   | -0.160437356 | 4.808135946 | -1.271843273 | 0.233979243 | 0.233979243 | -4.91752032  |
| 1431040_at   | -0.174734936 | 4.154783462 | -1.271775919 | 0.234002163 | 0.234002163 | -4.917589518 |
| 1430343_at   | 0.099721168  | 6.61781939  | 1.271727732  | 0.234018562 | 0.234018562 | -4.917639022 |
| 1417335_at   | 0.134431966  | 5.275354576 | 1.271688619  | 0.234031873 | 0.234031873 | -4.917679203 |
| 1459730_at   | -0.087237078 | 5.084921852 | -1.271677267 | 0.234035737 | 0.234035737 | -4.917690866 |
| 1436330_x_at | 0.206300029  | 6.181603212 | 1.271369241  | 0.234140592 | 0.234140592 | -4.918007275 |
| 1451414_at   | 0.089067762  | 4.884542672 | 1.271161426  | 0.234211356 | 0.234211356 | -4.918220718 |
| 1420095_s_at | 0.108470899  | 8.239569585 | 1.271066006  | 0.234243854 | 0.234243854 | -4.918318713 |
| 1446516_at   | 0.099030959  | 7.568426388 | 1.271008862  | 0.234263317 | 0.234263317 | -4.918377398 |
| 1431626_at   | -0.086621329 | 4.114542209 | -1.270960273 | 0.234279868 | 0.234279868 | -4.918427295 |
| 1457230_at   | 0.088194659  | 5.341356486 | 1.270944277  | 0.234285317 | 0.234285317 | -4.918443722 |
| 1458062_at   | -0.102684889 | 3.930169389 | -1.270930968 | 0.234289851 | 0.234289851 | -4.918457389 |
| 1416222_at   | 0.116888121  | 9.162673397 | 1.270915751  | 0.234295035 | 0.234295035 | -4.918473015 |
| 1448924_at   | -0.098713713 | 5.475747722 | -1.270882425 | 0.234306388 | 0.234306388 | -4.918507237 |
| 1444783_at   | -0.106017034 | 3.955443785 | -1.270531335 | 0.234426019 | 0.234426019 | -4.918867729 |
| 1430515_s_at | -0.087258278 | 9.222823678 | -1.270515109 | 0.23443155  | 0.23443155  | -4.918884388 |
| 1446417_at   | 0.174418251  | 5.711821414 | 1.270432749  | 0.234459621 | 0.234459621 | -4.918968943 |
| 1459817_at   | -0.124074872 | 5.53210352  | -1.270405375 | 0.234468952 | 0.234468952 | -4.918997046 |
| 1418250_at   | -0.148548211 | 6.152048878 | -1.270340263 | 0.234491147 | 0.234491147 | -4.91906389  |

|              |              |             |              |             |             |              |
|--------------|--------------|-------------|--------------|-------------|-------------|--------------|
| 1455233_at   | 0.137562165  | 6.599537152 | 1.270331752  | 0.234494048 | 0.234494048 | -4.919072627 |
| 1422769_at   | 0.101571123  | 9.418894835 | 1.270300983  | 0.234504537 | 0.234504537 | -4.919104213 |
| 1443076_at   | -0.129603733 | 5.108535337 | -1.27016173  | 0.234552014 | 0.234552014 | -4.91924716  |
| 1447990_at   | -0.112273603 | 3.323164686 | -1.270122869 | 0.234565265 | 0.234565265 | -4.91928705  |
| 1434802_s_at | 0.203189747  | 7.252781335 | 1.270067309  | 0.23458421  | 0.23458421  | -4.919344079 |
| 1439968_x_at | -0.140249475 | 3.671984326 | -1.269995613 | 0.23460866  | 0.23460866  | -4.919417669 |
| 1459657_s_at | 0.101396403  | 8.846144635 | 1.269975638  | 0.234615472 | 0.234615472 | -4.919438172 |
| 1438589_at   | -0.129035281 | 5.703990188 | -1.269969404 | 0.234617599 | 0.234617599 | -4.91944457  |
| 1457992_at   | 0.097363862  | 4.013039965 | 1.269832148  | 0.234664413 | 0.234664413 | -4.919585442 |
| 1424671_at   | -0.090045363 | 7.445786225 | -1.269806182 | 0.23467327  | 0.23467327  | -4.919612091 |
| 1457734_at   | -0.092396612 | 3.829481    | -1.269768162 | 0.234686239 | 0.234686239 | -4.919651111 |
| 1447631_at   | 0.176293072  | 6.569603857 | 1.269742181  | 0.234695102 | 0.234695102 | -4.919677774 |
| 1436092_at   | 0.095150543  | 4.245507581 | 1.269725377  | 0.234700835 | 0.234700835 | -4.919695019 |
| 1436129_at   | -0.179432708 | 4.399454773 | -1.269639083 | 0.234730275 | 0.234730275 | -4.919783577 |
| 1424940_s_at | -0.127197919 | 6.612974288 | -1.269624597 | 0.234735217 | 0.234735217 | -4.919798442 |
| 1427025_at   | -0.090060279 | 5.813853463 | -1.269601832 | 0.234742985 | 0.234742985 | -4.919821803 |
| 1459565_at   | 0.726219139  | 4.637059991 | 1.26956646   | 0.234755054 | 0.234755054 | -4.919858101 |
| 1444151_at   | -0.148978437 | 4.626967785 | -1.269516059 | 0.234772251 | 0.234772251 | -4.91990982  |
| 1428895_at   | -0.119233606 | 7.585608893 | -1.269430854 | 0.234801327 | 0.234801327 | -4.91999725  |
| 1453616_at   | 0.165928616  | 4.70612974  | 1.269406648  | 0.234809588 | 0.234809588 | -4.920022088 |
| 1454509_at   | 0.111177967  | 3.857938943 | 1.269361028  | 0.234825158 | 0.234825158 | -4.920068897 |
| 1458559_at   | -0.122783688 | 4.135311222 | -1.26920965  | 0.234876827 | 0.234876827 | -4.920224213 |
| 1439107_a_at | 0.115106175  | 8.43541962  | 1.269116261  | 0.234908707 | 0.234908707 | -4.920320025 |
| 1455040_s_at | 0.145967243  | 6.089102577 | 1.269014976  | 0.234943288 | 0.234943288 | -4.920423933 |
| 1447394_at   | 0.088445658  | 3.207094447 | 1.268946875  | 0.234966541 | 0.234966541 | -4.920493795 |
| 1451946_a_at | 0.088398115  | 4.175280206 | 1.268938626  | 0.234969357 | 0.234969357 | -4.920502257 |
| 1437088_at   | -0.083551883 | 8.348438947 | -1.268846382 | 0.235000858 | 0.235000858 | -4.920596882 |
| 1457027_at   | 0.110455719  | 6.045028495 | 1.268808136  | 0.235013919 | 0.235013919 | -4.920636113 |
| 1418060_a_at | 0.120568767  | 8.23704327  | 1.268732716  | 0.235039678 | 0.235039678 | -4.920713474 |
| 1446387_at   | -0.112916459 | 5.409645871 | -1.268556057 | 0.235100022 | 0.235100022 | -4.920894668 |
| 1458381_at   | 0.083342311  | 4.437274524 | 1.268539795  | 0.235105577 | 0.235105577 | -4.920911346 |
| 1447828_x_at | -0.127316094 | 5.396694328 | -1.268527765 | 0.235109687 | 0.235109687 | -4.920923684 |
| 1429734_at   | 0.139442506  | 7.724388822 | 1.268491036  | 0.235122235 | 0.235122235 | -4.920961353 |
| 1425643_at   | 0.09802768   | 4.883394858 | 1.268393699  | 0.235155493 | 0.235155493 | -4.921061179 |
| 1433019_at   | -0.124457605 | 5.417452229 | -1.268390678 | 0.235156525 | 0.235156525 | -4.921064276 |
| 1446360_at   | 0.110605233  | 5.924266284 | 1.268268862  | 0.235198151 | 0.235198151 | -4.921189199 |
| 1444139_at   | 0.098266011  | 9.203699174 | 1.268132593  | 0.235244724 | 0.235244724 | -4.921328934 |
| 1421670_a_at | 0.09905669   | 3.719465369 | 1.268062328  | 0.235268741 | 0.235268741 | -4.921400982 |
| 1431642_at   | 0.248738893  | 3.5501655   | 1.26779248   | 0.235360997 | 0.235360997 | -4.921677652 |
| 1460498_a_at | 0.123190181  | 6.566468839 | 1.267767183  | 0.235369647 | 0.235369647 | -4.921703587 |
| 1431063_at   | 0.093145986  | 5.291907857 | 1.26773372   | 0.23538109  | 0.23538109  | -4.921737893 |
| 1433125_at   | 0.108773199  | 5.571262536 | 1.267587215  | 0.235431193 | 0.235431193 | -4.921888081 |
| 1449105_at   | -0.098058512 | 6.367265502 | -1.26747595  | 0.23546925  | 0.23546925  | -4.922002136 |
| 1447096_at   | 0.413271602  | 6.79000555  | 1.267402526  | 0.235494368 | 0.235494368 | -4.922077397 |
| 1420088_at   | 0.118537993  | 11.37382241 | 1.267397446  | 0.235496105 | 0.235496105 | -4.922082604 |
| 1456744_x_at | 0.087570855  | 3.24790881  | 1.267124089  | 0.235589635 | 0.235589635 | -4.922362775 |
| 1430493_at   | 0.11078181   | 5.294600789 | 1.267116554  | 0.235592214 | 0.235592214 | -4.922370496 |
| 1457940_at   | -0.102821516 | 4.741182454 | -1.266993372 | 0.235634371 | 0.235634371 | -4.922496735 |
| 1417988_at   | 0.18039103   | 3.960461512 | 1.266953627  | 0.235647975 | 0.235647975 | -4.922537465 |
| 1425193_at   | -0.107388377 | 8.382715135 | -1.266920725 | 0.235659237 | 0.235659237 | -4.922571181 |
| 1448650_a_at | 0.11368278   | 8.406451213 | 1.26689306   | 0.235668707 | 0.235668707 | -4.922599531 |
| 1421059_a_at | -0.089659202 | 9.790279475 | -1.266754714 | 0.235716067 | 0.235716067 | -4.922741292 |
| 1435165_at   | 0.119628578  | 4.355824857 | 1.26667245   | 0.235744232 | 0.235744232 | -4.922825582 |

|              |              |             |              |             |             |              |
|--------------|--------------|-------------|--------------|-------------|-------------|--------------|
| 1430193_at   | 0.135351268  | 8.127184912 | 1.266436318  | 0.235825094 | 0.235825094 | -4.923067511 |
| 1425392_a_at | -0.144236609 | 4.728599697 | -1.266400694 | 0.235837296 | 0.235837296 | -4.923104006 |
| 1430849_a_at | -0.170423058 | 6.478323909 | -1.266380607 | 0.235844176 | 0.235844176 | -4.923124584 |
| 1426258_at   | -0.100671452 | 8.747639323 | -1.26600688  | 0.235972211 | 0.235972211 | -4.923507412 |
| 1418536_at   | -0.096890324 | 4.231994623 | -1.265967181 | 0.235985815 | 0.235985815 | -4.923548072 |
| 1458819_at   | -0.096146379 | 5.562811234 | -1.26578698  | 0.236047573 | 0.236047573 | -4.92373263  |
| 1421881_a_at | 0.410479213  | 6.719752041 | 1.265641915  | 0.2360973   | 0.2360973   | -4.92388119  |
| 1439471_at   | -0.088525389 | 3.918898294 | -1.265626072 | 0.236102731 | 0.236102731 | -4.923897414 |
| 1423948_at   | -0.143151087 | 7.915330528 | -1.265566465 | 0.236123167 | 0.236123167 | -4.923958454 |
| 1459361_at   | 0.141620891  | 5.342436277 | 1.265526288  | 0.236136942 | 0.236136942 | -4.923999594 |
| 1453126_at   | 0.105087023  | 5.143709825 | 1.265491979  | 0.236148705 | 0.236148705 | -4.924034727 |
| 1442398_at   | -0.124615012 | 4.575378868 | -1.265223551 | 0.236240759 | 0.236240759 | -4.92430957  |
| 1444221_at   | -0.096278568 | 5.507771097 | -1.265210276 | 0.236245312 | 0.236245312 | -4.924323161 |
| 1433413_at   | -0.104369799 | 5.604351894 | -1.265205835 | 0.236246835 | 0.236246835 | -4.924327708 |
| 1450210_at   | -0.091661166 | 4.357506434 | -1.265138945 | 0.236269779 | 0.236269779 | -4.924396189 |
| 1446742_at   | 0.376951238  | 5.040687305 | 1.26495412   | 0.236333185 | 0.236333185 | -4.924585401 |
| 1416391_at   | -0.097428858 | 6.785554053 | -1.264903714 | 0.23635048  | 0.23635048  | -4.924636999 |
| 1425364_a_at | 0.080887024  | 9.885613302 | 1.264863569  | 0.236364255 | 0.236364255 | -4.924678094 |
| 1428845_at   | 0.076451075  | 10.65251332 | 1.264790672  | 0.23638927  | 0.23638927  | -4.924752712 |
| 1443815_x_at | 0.089272619  | 3.842392196 | 1.264718698  | 0.23641397  | 0.23641397  | -4.924826383 |
| 1435144_at   | -0.092533016 | 6.76241474  | -1.264625127 | 0.236446085 | 0.236446085 | -4.924922155 |
| 1417996_at   | -0.103809279 | 5.483046626 | -1.264614612 | 0.236449694 | 0.236449694 | -4.924932917 |
| 1438572_at   | -0.10271477  | 6.478069662 | -1.264513563 | 0.23648438  | 0.23648438  | -4.925036337 |
| 1425275_at   | -0.098706624 | 5.620819122 | -1.264358033 | 0.236537775 | 0.236537775 | -4.925195508 |
| 1449167_at   | 0.119057707  | 7.420293397 | 1.264329703  | 0.236547503 | 0.236547503 | -4.925224499 |
| 1432155_at   | -0.111154304 | 4.478211247 | -1.264311895 | 0.236553617 | 0.236553617 | -4.925242723 |
| 1437295_at   | 0.116258885  | 8.80666023  | 1.264068858  | 0.236637079 | 0.236637079 | -4.925491415 |
| 1456748_a_at | -0.101264939 | 8.067355326 | -1.263989489 | 0.236664341 | 0.236664341 | -4.925572624 |
| 1422957_at   | -0.106670014 | 3.544278921 | -1.263978722 | 0.236668039 | 0.236668039 | -4.92558364  |
| 1422184_a_at | -0.141225988 | 8.26928623  | -1.263977929 | 0.236668312 | 0.236668312 | -4.925584452 |
| 1447379_at   | 0.139153349  | 5.353580728 | 1.26396152   | 0.236673948 | 0.236673948 | -4.92560124  |
| 1458358_at   | -0.082353006 | 7.779396369 | -1.263874424 | 0.236703868 | 0.236703868 | -4.925690349 |
| 1431325_at   | 0.087148811  | 3.465427606 | 1.263871839  | 0.236704756 | 0.236704756 | -4.925692995 |
| 1417230_at   | 0.075832133  | 7.056665481 | 1.263793846  | 0.236731551 | 0.236731551 | -4.925772787 |
| 1442032_at   | 0.133741919  | 4.654625558 | 1.263722082  | 0.236756208 | 0.236756208 | -4.925846204 |
| 1454877_at   | 0.086631566  | 10.34162112 | 1.263698709  | 0.23676424  | 0.23676424  | -4.925870115 |
| 1433278_at   | -0.110829224 | 5.298507919 | -1.263617424 | 0.236792172 | 0.236792172 | -4.925953268 |
| 1425961_at   | -0.085911667 | 4.329791689 | -1.263593572 | 0.236800369 | 0.236800369 | -4.925977667 |
| 1434866_x_at | 0.126607133  | 6.21034905  | 1.263512994  | 0.236828061 | 0.236828061 | -4.926060092 |
| 1416205_at   | -0.09337381  | 8.189290615 | -1.263478124 | 0.236840046 | 0.236840046 | -4.926095761 |
| 1442272_at   | 0.11212304   | 3.81569442  | 1.263463832  | 0.236844958 | 0.236844958 | -4.92611038  |
| 1438431_at   | -0.086158464 | 4.182891599 | -1.263328836 | 0.236891362 | 0.236891362 | -4.926248459 |
| 1418602_at   | -0.246264219 | 6.095714784 | -1.26330913  | 0.236898136 | 0.236898136 | -4.926268615 |
| 1450447_at   | 0.116664125  | 5.976565866 | 1.26326631   | 0.236912857 | 0.236912857 | -4.92631241  |
| 1447586_at   | 0.116887877  | 3.917522982 | 1.263162105  | 0.236948684 | 0.236948684 | -4.926418985 |
| 1456412_a_at | 0.093336181  | 6.861767801 | 1.26315914   | 0.236949703 | 0.236949703 | -4.926422016 |
| 1446984_at   | 0.087739482  | 3.962748839 | 1.26305679   | 0.236984897 | 0.236984897 | -4.926526688 |
| 1432560_at   | -0.094935299 | 3.792280335 | -1.262979712 | 0.237011404 | 0.237011404 | -4.926605511 |
| 1443946_s_at | -0.220447753 | 5.843017152 | -1.26283193  | 0.237062232 | 0.237062232 | -4.926756629 |
| 1418177_at   | 0.102010653  | 4.485837347 | 1.262710844  | 0.237103885 | 0.237103885 | -4.926880439 |
| 1456259_at   | -0.171292551 | 5.083065649 | -1.262708844 | 0.237104573 | 0.237104573 | -4.926882484 |
| 1416530_a_at | 0.099470553  | 9.76878444  | 1.262707181  | 0.237105145 | 0.237105145 | -4.926884184 |
| 1457352_x_at | -0.140475362 | 4.43214817  | -1.262674332 | 0.237116446 | 0.237116446 | -4.926917772 |



|              |              |             |              |             |             |              |
|--------------|--------------|-------------|--------------|-------------|-------------|--------------|
| 1421103_at   | 0.180467193  | 5.604424754 | 1.262478343  | 0.237183882 | 0.237183882 | -4.92711815  |
| 1447434_at   | -0.104206155 | 3.607842392 | -1.262386034 | 0.237215648 | 0.237215648 | -4.927212519 |
| 1423539_at   | 0.086256969  | 8.201809606 | 1.262385308  | 0.237215898 | 0.237215898 | -4.927213261 |
| 1443719_x_at | 0.102518195  | 7.466696869 | 1.262289787  | 0.237248774 | 0.237248774 | -4.927310908 |
| 1442690_at   | -0.106748847 | 4.201574412 | -1.262257764 | 0.237259796 | 0.237259796 | -4.927343643 |
| 1445184_at   | -0.095012673 | 3.210853488 | -1.262123647 | 0.237305964 | 0.237305964 | -4.927480736 |
| 1434643_at   | 0.114639572  | 8.962173162 | 1.261978928  | 0.237355789 | 0.237355789 | -4.927628655 |
| 1422939_at   | 0.123235591  | 3.397382895 | 1.261740043  | 0.237438054 | 0.237438054 | -4.927872797 |
| 1438320_s_at | 0.078948176  | 11.53457321 | 1.261722962  | 0.237443938 | 0.237443938 | -4.927890253 |
| 1460727_at   | -0.138757687 | 7.651597816 | -1.26169301  | 0.237454254 | 0.237454254 | -4.927920862 |
| 1442452_at   | -0.097765552 | 5.697440413 | -1.261691136 | 0.2374549   | 0.2374549   | -4.927922777 |
| 1423776_s_at | 0.09797153   | 7.546010681 | 1.26164097   | 0.237472179 | 0.237472179 | -4.927974042 |
| 1457782_at   | 0.110236201  | 6.544237298 | 1.261530121  | 0.237510365 | 0.237510365 | -4.928087314 |
| 1429110_a_at | -0.091406098 | 7.749465824 | -1.261430725 | 0.23754461  | 0.23754461  | -4.928188877 |
| 1443581_at   | -0.090269563 | 5.936193562 | -1.261363038 | 0.237567932 | 0.237567932 | -4.928258037 |
| 1430486_at   | -0.076259425 | 3.878850862 | -1.261330886 | 0.237579011 | 0.237579011 | -4.928290887 |
| 1449402_at   | 0.095504428  | 5.260683682 | 1.261330765  | 0.237579052 | 0.237579052 | -4.92829101  |
| 1440355_at   | 0.087446059  | 7.762315074 | 1.261319998  | 0.237582763 | 0.237582763 | -4.928302011 |
| 1459813_at   | -0.134340068 | 5.619771763 | -1.261293423 | 0.23759192  | 0.23759192  | -4.928329163 |
| 1450228_a_at | -0.155637774 | 6.408349637 | -1.261222129 | 0.23761649  | 0.23761649  | -4.928402003 |
| 1427977_x_at | -0.081583615 | 3.281629333 | -1.261216477 | 0.237618438 | 0.237618438 | -4.928407778 |
| 1423584_at   | -0.085270151 | 8.151138281 | -1.261192976 | 0.237626537 | 0.237626537 | -4.928431788 |
| 1442687_at   | 0.129579169  | 4.743277208 | 1.261070469  | 0.237668761 | 0.237668761 | -4.928556942 |
| 1456060_at   | 0.1355444    | 10.97295311 | 1.261047201  | 0.237676782 | 0.237676782 | -4.928580712 |
| 1437052_s_at | 0.09797333   | 9.059485727 | 1.260954202  | 0.237708841 | 0.237708841 | -4.928675715 |
| 1447152_at   | 0.138388563  | 4.4808638   | 1.260890995  | 0.237730632 | 0.237730632 | -4.92874028  |
| 1434627_at   | -0.101112455 | 7.443586628 | -1.260764132 | 0.237774373 | 0.237774373 | -4.928869864 |
| 1419838_s_at | -0.148886373 | 9.77858905  | -1.26070316  | 0.237795399 | 0.237795399 | -4.928932141 |
| 1426133_a_at | 0.094398868  | 7.401972037 | 1.260682173  | 0.237802636 | 0.237802636 | -4.928953577 |
| 1417342_at   | 0.099558668  | 6.254621604 | 1.260661318  | 0.237809828 | 0.237809828 | -4.928974877 |
| 1430554_at   | 0.126092007  | 9.52789736  | 1.260596021  | 0.237832348 | 0.237832348 | -4.929041568 |
| 1440556_at   | -0.112470333 | 3.60483005  | -1.260560702 | 0.237844529 | 0.237844529 | -4.92907764  |
| 1433939_at   | 0.094040358  | 10.32269549 | 1.260552792  | 0.237847257 | 0.237847257 | -4.929085718 |
| 1457899_at   | -0.103044531 | 4.506192095 | -1.260517341 | 0.237859485 | 0.237859485 | -4.929121923 |
| 1459154_at   | 0.097553034  | 6.665667698 | 1.260493719  | 0.237867633 | 0.237867633 | -4.929146048 |
| 1443241_at   | -0.090826486 | 6.199808867 | -1.260479824 | 0.237872425 | 0.237872425 | -4.929160238 |
| 1453868_at   | -0.081863548 | 4.639388534 | -1.26041695  | 0.237894114 | 0.237894114 | -4.929224449 |
| 1425448_x_at | -0.083109921 | 7.966951027 | -1.26035507  | 0.237915461 | 0.237915461 | -4.929287641 |
| 1436316_at   | 0.118847601  | 8.660132272 | 1.260279208  | 0.237941634 | 0.237941634 | -4.929365109 |
| 1428757_at   | -0.078732852 | 8.634391909 | -1.260136447 | 0.237990894 | 0.237990894 | -4.929510884 |
| 1458982_at   | -0.103437589 | 3.338949754 | -1.2601234   | 0.237995396 | 0.237995396 | -4.929524206 |
| 1422290_at   | -0.107437509 | 4.727457911 | -1.260055739 | 0.238018746 | 0.238018746 | -4.929593291 |
| 1456271_at   | 0.102747807  | 4.475613625 | 1.260039927  | 0.238024203 | 0.238024203 | -4.929609435 |
| 1437299_at   | 0.090371135  | 3.298046758 | 1.259994047  | 0.238040037 | 0.238040037 | -4.929656279 |
| 1451356_at   | 0.076476585  | 10.64318158 | 1.259992506  | 0.238040569 | 0.238040569 | -4.929657852 |
| 1458407_s_at | 0.137032749  | 7.825201242 | 1.259978831  | 0.238045289 | 0.238045289 | -4.929671814 |
| 1433062_at   | -0.116268196 | 4.636731422 | -1.259909096 | 0.238069359 | 0.238069359 | -4.929743012 |
| 1460160_at   | -0.126301967 | 4.467205665 | -1.259854213 | 0.238088303 | 0.238088303 | -4.929799044 |
| 1434086_at   | -0.090509768 | 7.790680306 | -1.259702853 | 0.238140557 | 0.238140557 | -4.929953564 |
| 1450648_s_at | 0.127606315  | 5.586655515 | 1.259553861  | 0.238192002 | 0.238192002 | -4.930105655 |
| 1425316_at   | 0.111542349  | 4.755672589 | 1.259449865  | 0.238227916 | 0.238227916 | -4.930211807 |
| 1424540_at   | -0.112691592 | 9.892222727 | -1.25942539  | 0.238236369 | 0.238236369 | -4.930236787 |
| 1453635_at   | -0.116452262 | 5.203876987 | -1.259402424 | 0.238244301 | 0.238244301 | -4.930260229 |

|              |              |             |              |             |             |              |
|--------------|--------------|-------------|--------------|-------------|-------------|--------------|
| 1457520_at   | -0.102843583 | 5.513603622 | -1.259220947 | 0.238306986 | 0.238306986 | -4.930445449 |
| 1419149_at   | -0.091984757 | 4.735056537 | -1.259171277 | 0.238324146 | 0.238324146 | -4.93049614  |
| 1438897_at   | 0.122143586  | 4.582963015 | 1.259104312  | 0.238347282 | 0.238347282 | -4.93056448  |
| 1422158_at   | -0.117958765 | 7.425050353 | -1.259081516 | 0.238355158 | 0.238355158 | -4.930587743 |
| 1429356_s_at | -0.129150108 | 7.175650546 | -1.25907912  | 0.238355986 | 0.238355986 | -4.930590189 |
| 1451093_at   | -0.084540534 | 5.929654259 | -1.259055979 | 0.238363981 | 0.238363981 | -4.930613804 |
| 1439046_at   | 0.086556445  | 8.799323502 | 1.258920565  | 0.238410774 | 0.238410774 | -4.930751987 |
| 1443553_at   | 0.098136727  | 3.546649323 | 1.258908562  | 0.238414922 | 0.238414922 | -4.930764235 |
| 1446039_at   | -0.106672492 | 5.595458982 | -1.258824604 | 0.238443938 | 0.238443938 | -4.930849905 |
| 1431651_at   | -0.156363312 | 4.356922292 | -1.258774313 | 0.23846132  | 0.23846132  | -4.930901218 |
| 1448105_at   | -0.132117547 | 4.957098497 | -1.258748176 | 0.238470354 | 0.238470354 | -4.930927887 |
| 1456082_x_at | -0.115281012 | 9.09109859  | -1.258521325 | 0.238548776 | 0.238548776 | -4.931159334 |
| 1425862_a_at | 0.125051465  | 7.370747326 | 1.258429955  | 0.238580369 | 0.238580369 | -4.931252547 |
| 1417766_at   | 0.081027451  | 9.506443969 | 1.258128453  | 0.238684641 | 0.238684641 | -4.931560098 |
| 1443876_at   | -0.087484097 | 4.232714862 | -1.257930988 | 0.238752954 | 0.238752954 | -4.931761498 |
| 1459115_at   | 0.091463449  | 3.811378244 | 1.25789079   | 0.238766862 | 0.238766862 | -4.931802495 |
| 1446241_at   | 0.129216066  | 4.51570317  | 1.257828345  | 0.238788469 | 0.238788469 | -4.931866179 |
| 1441761_at   | 0.096299029  | 3.983444496 | 1.257666426  | 0.238844504 | 0.238844504 | -4.9320313   |
| 1447456_x_at | -0.094608352 | 5.747941812 | -1.257618238 | 0.238861182 | 0.238861182 | -4.932080438 |
| 1420221_at   | -0.122215206 | 3.620745296 | -1.257576235 | 0.23887572  | 0.23887572  | -4.932123269 |
| 1441647_at   | -0.112279389 | 3.892131437 | -1.257338876 | 0.23895789  | 0.23895789  | -4.932365284 |
| 1455243_at   | -0.09373863  | 7.361594068 | -1.257335935 | 0.238958908 | 0.238958908 | -4.932368282 |
| 1454108_at   | -0.11960799  | 3.541620981 | -1.257331166 | 0.238960559 | 0.238960559 | -4.932373145 |
| 1426667_a_at | -0.093607235 | 8.465221314 | -1.257320194 | 0.238964358 | 0.238964358 | -4.932384331 |
| 1434344_at   | 0.100593698  | 9.434704631 | 1.257286447  | 0.238976043 | 0.238976043 | -4.932418738 |
| 1453401_at   | -0.089024522 | 3.75061948  | -1.257205356 | 0.239004122 | 0.239004122 | -4.93250141  |
| 1451689_a_at | 0.085012788  | 7.321290138 | 1.25719924   | 0.23900624  | 0.23900624  | -4.932507645 |
| 1449741_at   | 0.104100338  | 3.924612682 | 1.257146132  | 0.239024631 | 0.239024631 | -4.932561787 |
| 1436790_a_at | 0.472854058  | 9.630794794 | 1.257144165  | 0.239025313 | 0.239025313 | -4.932563792 |
| 1426771_at   | 0.13423667   | 8.257577983 | 1.257097095  | 0.239041614 | 0.239041614 | -4.932611776 |
| 1451361_a_at | -0.113610644 | 6.471324639 | -1.257067174 | 0.239051977 | 0.239051977 | -4.932642279 |
| 1455616_at   | 0.094216669  | 7.976053106 | 1.257051827  | 0.239057292 | 0.239057292 | -4.932657924 |
| 1418281_at   | 0.090108852  | 8.793688518 | 1.257042924  | 0.239060376 | 0.239060376 | -4.932666999 |
| 1435426_s_at | -0.178361731 | 5.342403786 | -1.257012261 | 0.239070996 | 0.239070996 | -4.932698257 |
| 1445668_at   | -0.120659892 | 5.993948061 | -1.256981941 | 0.239081498 | 0.239081498 | -4.932729164 |
| 1427753_at   | -0.101636301 | 3.650244579 | -1.256937471 | 0.239096902 | 0.239096902 | -4.932774494 |
| 1458586_at   | 0.235424338  | 6.46191364  | 1.256926923  | 0.239100556 | 0.239100556 | -4.932785246 |
| 1434622_at   | -0.101031011 | 8.16268158  | -1.256900067 | 0.239109859 | 0.239109859 | -4.932812621 |
| 1431103_at   | 0.100642612  | 3.520604795 | 1.256899395  | 0.239110092 | 0.239110092 | -4.932813306 |
| 1456892_at   | 0.157094177  | 5.352031134 | 1.256869869  | 0.23912032  | 0.23912032  | -4.932843402 |
| 1455675_a_at | -0.090683988 | 10.07896418 | -1.256814672 | 0.239139443 | 0.239139443 | -4.932899663 |
| 1455949_at   | -0.108438477 | 4.860621009 | -1.256809388 | 0.239141273 | 0.239141273 | -4.932905049 |
| 1439310_at   | 0.086038251  | 3.403436855 | 1.256797783  | 0.239145294 | 0.239145294 | -4.932916878 |
| 1431295_a_at | 0.178319954  | 7.157540892 | 1.256790541  | 0.239147803 | 0.239147803 | -4.932924259 |
| 1445281_a_at | -0.08955017  | 4.644026281 | -1.256775234 | 0.239153106 | 0.239153106 | -4.932939861 |
| 1419123_a_at | -0.113920582 | 9.36351663  | -1.256722679 | 0.239171315 | 0.239171315 | -4.932993426 |
| 1443731_at   | -0.094364538 | 3.729542414 | -1.25664394  | 0.239198598 | 0.239198598 | -4.933073677 |
| 1440959_s_at | 0.117831813  | 5.471589671 | 1.256577705  | 0.239221551 | 0.239221551 | -4.933141181 |
| 1432017_at   | 0.0798085    | 5.017333552 | 1.256556322  | 0.239228961 | 0.239228961 | -4.933162973 |
| 1450341_at   | 0.124698819  | 5.513941494 | 1.256485427  | 0.239253531 | 0.239253531 | -4.933235223 |
| 1447083_at   | -0.10529691  | 3.981042853 | -1.256391792 | 0.239285985 | 0.239285985 | -4.933330643 |
| 1434722_at   | -0.155285463 | 4.069823775 | -1.256388314 | 0.239287191 | 0.239287191 | -4.933334187 |
| 1433790_at   | -0.116334561 | 7.372531181 | -1.256318345 | 0.239311445 | 0.239311445 | -4.933405487 |

|              |              |             |              |             |             |              |
|--------------|--------------|-------------|--------------|-------------|-------------|--------------|
| 1433490_s_at | -0.089270268 | 10.62421537 | -1.256305167 | 0.239316013 | 0.239316013 | -4.933418915 |
| 1447215_at   | -0.120176745 | 3.9845458   | -1.25622292  | 0.239344526 | 0.239344526 | -4.933502722 |
| 1417316_at   | -0.101582133 | 8.714540253 | -1.256211463 | 0.239348498 | 0.239348498 | -4.933514396 |
| 1445468_at   | -0.122794562 | 4.834256528 | -1.256133957 | 0.23937537  | 0.23937537  | -4.933593368 |
| 1442920_at   | -0.090811993 | 5.568700031 | -1.256072611 | 0.239396642 | 0.239396642 | -4.933655872 |
| 1440797_at   | -0.130042917 | 7.073991709 | -1.256011118 | 0.239417966 | 0.239417966 | -4.933718525 |
| 1449846_at   | 0.135813593  | 4.233262905 | 1.256004989  | 0.239420091 | 0.239420091 | -4.933724769 |
| 1442682_at   | 0.1061618    | 6.700623066 | 1.255947201  | 0.239440131 | 0.239440131 | -4.933783644 |
| 1452010_at   | 0.222159855  | 5.016865011 | 1.25589582   | 0.239457951 | 0.239457951 | -4.933835991 |
| 1452199_at   | 0.089506845  | 7.69853627  | 1.255720636  | 0.239518716 | 0.239518716 | -4.934014454 |
| 1428491_at   | -0.091501159 | 8.831293762 | -1.255497604 | 0.239596096 | 0.239596096 | -4.934241637 |
| 1449371_at   | 0.098471698  | 6.341773513 | 1.255463541  | 0.239607916 | 0.239607916 | -4.934276331 |
| 1417788_at   | 0.232123021  | 5.594674149 | 1.255362479  | 0.239642987 | 0.239642987 | -4.934379264 |
| 1442827_at   | 0.094715396  | 3.717478445 | 1.255287612  | 0.239668971 | 0.239668971 | -4.934455513 |
| 1455369_at   | 0.103156553  | 4.540930505 | 1.255235217  | 0.239687156 | 0.239687156 | -4.934508873 |
| 1435928_at   | -0.085889945 | 5.440019764 | -1.255160483 | 0.239713098 | 0.239713098 | -4.934584981 |
| 1455661_at   | -0.07854298  | 6.456265712 | -1.255007746 | 0.239766122 | 0.239766122 | -4.934740517 |
| 1456591_x_at | 0.106059698  | 3.585987623 | 1.254979684  | 0.239775865 | 0.239775865 | -4.934769092 |
| 1447593_x_at | 0.105478139  | 3.69705088  | 1.254960619  | 0.239782485 | 0.239782485 | -4.934788505 |
| 1458353_at   | -0.098820048 | 7.673882119 | -1.254881886 | 0.239809823 | 0.239809823 | -4.934868674 |
| 1418718_at   | -0.106448166 | 7.03585088  | -1.254796318 | 0.239839538 | 0.239839538 | -4.934955798 |
| 1443032_at   | 0.091400564  | 4.556877505 | 1.254749489  | 0.239855801 | 0.239855801 | -4.935003478 |
| 1450461_at   | -0.204936735 | 6.888994919 | -1.254735039 | 0.23986082  | 0.23986082  | -4.93501819  |
| 1418901_at   | 0.09967358   | 8.322930123 | 1.254687521  | 0.239877323 | 0.239877323 | -4.935066569 |
| 1452234_s_at | -0.086328799 | 6.711203918 | -1.254376283 | 0.239985444 | 0.239985444 | -4.935383417 |
| 1432773_at   | 0.12215235   | 4.018478458 | 1.254371184  | 0.239987216 | 0.239987216 | -4.935388607 |
| 1416532_at   | -0.107383014 | 9.857380286 | -1.254330008 | 0.240001523 | 0.240001523 | -4.935430521 |
| 1436001_at   | 0.085523587  | 7.429508257 | 1.254260785  | 0.240025578 | 0.240025578 | -4.935500984 |
| 1438946_at   | -0.140556842 | 6.442452103 | -1.254223677 | 0.240038473 | 0.240038473 | -4.935538755 |
| 1459502_at   | -0.173523536 | 3.749894984 | -1.254198813 | 0.240047114 | 0.240047114 | -4.935564062 |
| 1434172_at   | 0.393522243  | 7.277726094 | 1.254160376  | 0.240060472 | 0.240060472 | -4.935603185 |
| 1425396_a_at | 0.112438428  | 6.3297666   | 1.254007291  | 0.240113681 | 0.240113681 | -4.935758992 |
| 1459611_at   | -0.086966733 | 4.307683951 | -1.253989391 | 0.240119903 | 0.240119903 | -4.935777209 |
| 1457673_at   | -0.140406138 | 7.022903966 | -1.253909178 | 0.240147787 | 0.240147787 | -4.935858843 |
| 1458214_at   | -0.109275015 | 4.547175008 | -1.253898202 | 0.240151603 | 0.240151603 | -4.935870013 |
| 1431204_at   | -0.201454196 | 6.134706466 | -1.253786291 | 0.240190512 | 0.240190512 | -4.935983898 |
| 1425057_at   | 0.128741353  | 4.124798978 | 1.253745703  | 0.240204624 | 0.240204624 | -4.936025201 |
| 1416549_at   | -0.09853051  | 8.026231322 | -1.253641776 | 0.240240764 | 0.240240764 | -4.936130954 |
| 1437017_at   | 0.118205289  | 7.901827286 | 1.253583448  | 0.240261048 | 0.240261048 | -4.936190304 |
| 1441846_x_at | -0.087737901 | 4.046446657 | -1.253576904 | 0.240263324 | 0.240263324 | -4.936196962 |
| 1452957_at   | 0.086673789  | 3.713265877 | 1.253519996  | 0.240283117 | 0.240283117 | -4.936254866 |
| 1429314_at   | 0.176166349  | 7.157066577 | 1.253387162  | 0.240329321 | 0.240329321 | -4.936390016 |
| 1448436_a_at | 0.086207493  | 7.891650771 | 1.253381863  | 0.240331164 | 0.240331164 | -4.936395407 |
| 1459074_at   | -0.084099305 | 3.980449418 | -1.253295798 | 0.240361105 | 0.240361105 | -4.936482968 |
| 1416925_at   | -0.104766608 | 9.871150137 | -1.253244659 | 0.240378897 | 0.240378897 | -4.936534993 |
| 1428170_at   | 0.13627992   | 6.917754063 | 1.253238794  | 0.240380938 | 0.240380938 | -4.93654096  |
| 1433215_at   | 0.146752393  | 4.577455748 | 1.253222108  | 0.240386743 | 0.240386743 | -4.936557935 |
| 1416220_at   | -0.079767564 | 11.25557653 | -1.253176571 | 0.240402587 | 0.240402587 | -4.936604259 |
| 1456475_s_at | -0.124487629 | 8.883799966 | -1.253176095 | 0.240402753 | 0.240402753 | -4.936604743 |
| 1451920_a_at | 0.100090676  | 8.600448895 | 1.253150293  | 0.240411731 | 0.240411731 | -4.936630991 |
| 1452001_at   | -0.108692377 | 4.622847573 | -1.253125807 | 0.240420251 | 0.240420251 | -4.9366559   |
| 1423627_at   | -0.091755983 | 6.829274804 | -1.25307414  | 0.24043823  | 0.24043823  | -4.936708458 |
| 1443258_at   | -0.103842706 | 6.108022638 | -1.253030215 | 0.240453516 | 0.240453516 | -4.936753139 |

|              |              |             |              |             |             |              |
|--------------|--------------|-------------|--------------|-------------|-------------|--------------|
| 1423836_at   | -0.135566676 | 9.012428743 | -1.253000391 | 0.240463896 | 0.240463896 | -4.936783476 |
| 1440810_x_at | -0.108216368 | 3.814199139 | -1.252906146 | 0.240496697 | 0.240496697 | -4.936879338 |
| 1431318_at   | 0.122706662  | 3.4450894   | 1.252901773  | 0.240498219 | 0.240498219 | -4.936883787 |
| 1419737_a_at | -0.075242824 | 11.87523656 | -1.252641961 | 0.240588664 | 0.240588664 | -4.937148032 |
| 1422330_at   | 0.109535152  | 4.20322551  | 1.252638381  | 0.24058991  | 0.24058991  | -4.937151673 |
| 1441900_x_at | -0.120590429 | 6.545228691 | -1.25261235  | 0.240598974 | 0.240598974 | -4.937178146 |
| 1440765_at   | -0.104855163 | 6.830111043 | -1.252491333 | 0.240641113 | 0.240641113 | -4.937301214 |
| 1432658_at   | 0.092817238  | 3.263756004 | 1.252427385  | 0.240663383 | 0.240663383 | -4.937366241 |
| 1430221_at   | 0.118315976  | 5.216526131 | 1.25233147   | 0.240696788 | 0.240696788 | -4.937463773 |
| 1434938_at   | -0.102566427 | 7.663805853 | -1.252310754 | 0.240704004 | 0.240704004 | -4.937484838 |
| 1419204_at   | -0.10008424  | 6.740605917 | -1.252237519 | 0.240729513 | 0.240729513 | -4.937559302 |
| 1446252_at   | 0.099533069  | 3.32450343  | 1.252195274  | 0.240744229 | 0.240744229 | -4.937602255 |
| 1424622_at   | -0.137199181 | 7.896110179 | -1.252053826 | 0.240793507 | 0.240793507 | -4.937746067 |
| 1427188_at   | 0.093738541  | 8.732068553 | 1.252048326  | 0.240795424 | 0.240795424 | -4.937751659 |
| 1442944_at   | -0.101618681 | 6.423088291 | -1.252030252 | 0.240801721 | 0.240801721 | -4.937770034 |
| 1416345_at   | 0.07854331   | 9.643685944 | 1.251888024  | 0.240851281 | 0.240851281 | -4.937914626 |
| 1430621_at   | -0.104926189 | 3.146620292 | -1.251708663 | 0.240913792 | 0.240913792 | -4.938096952 |
| 1441220_at   | 0.119786878  | 5.865943088 | 1.251701349  | 0.240916341 | 0.240916341 | -4.938104386 |
| 1429648_at   | -0.084203753 | 8.403976674 | -1.251674081 | 0.240925846 | 0.240925846 | -4.938132104 |
| 1425151_a_at | -0.091443736 | 6.45236545  | -1.25159092  | 0.240954835 | 0.240954835 | -4.938216632 |
| 1445511_at   | -0.086380402 | 5.516448102 | -1.251408156 | 0.241018555 | 0.241018555 | -4.938402388 |
| 1447542_at   | -0.103365799 | 3.161282014 | -1.251402838 | 0.241020409 | 0.241020409 | -4.938407792 |
| 1445252_at   | -0.125713082 | 5.178995496 | -1.251375213 | 0.241030041 | 0.241030041 | -4.938435868 |
| 1434058_at   | 0.094225589  | 7.954343522 | 1.251359681  | 0.241035457 | 0.241035457 | -4.938451653 |
| 1416700_at   | 0.109325226  | 9.714827495 | 1.251325831  | 0.241047261 | 0.241047261 | -4.938486054 |
| 1429748_at   | 0.115093818  | 3.507584716 | 1.251239303  | 0.241077436 | 0.241077436 | -4.938573988 |
| 1435827_at   | 0.125904483  | 7.151294043 | 1.251226138  | 0.241082028 | 0.241082028 | -4.938587367 |
| 1445288_at   | -0.080447813 | 3.289653478 | -1.251202019 | 0.241090439 | 0.241090439 | -4.938611876 |
| 1430965_at   | -0.142098041 | 5.290344854 | -1.251185889 | 0.241096065 | 0.241096065 | -4.938628268 |
| 1455398_at   | 0.106619645  | 8.788004557 | 1.250878694  | 0.241203226 | 0.241203226 | -4.938940413 |
| 1431416_a_at | -0.121910599 | 4.423288121 | -1.250796037 | 0.241232067 | 0.241232067 | -4.939024393 |
| 1436233_at   | -0.111720409 | 4.679427456 | -1.250704081 | 0.241264155 | 0.241264155 | -4.939117816 |
| 1440673_at   | 0.101744368  | 3.589954951 | 1.250687494  | 0.241269943 | 0.241269943 | -4.939134667 |
| 1442106_at   | 0.155225819  | 6.104037401 | 1.250630019  | 0.241290002 | 0.241290002 | -4.939193057 |
| 1416153_at   | -0.143708825 | 10.30160112 | -1.250363599 | 0.241382998 | 0.241382998 | -4.939463691 |
| 1431846_at   | 0.099340033  | 4.490946154 | 1.250351382  | 0.241387263 | 0.241387263 | -4.939476101 |
| 1427632_x_at | 0.094291446  | 3.265528227 | 1.250305577  | 0.241403255 | 0.241403255 | -4.939522627 |
| 1420983_at   | 0.083338347  | 5.637522564 | 1.250251134  | 0.241422264 | 0.241422264 | -4.939577924 |
| 1449587_a_at | -0.084570906 | 3.096661618 | -1.250223884 | 0.241431779 | 0.241431779 | -4.939605602 |
| 1442113_at   | -0.10349895  | 3.238825856 | -1.250151952 | 0.241456896 | 0.241456896 | -4.939678659 |
| 1439382_x_at | 0.101874563  | 4.292632917 | 1.250140482  | 0.241460902 | 0.241460902 | -4.939690309 |
| 1430244_at   | -0.105995614 | 3.478111276 | -1.250089412 | 0.241478736 | 0.241478736 | -4.939742176 |
| 1434180_at   | 0.101489132  | 10.80687605 | 1.250027706  | 0.241500287 | 0.241500287 | -4.939804843 |
| 1444400_at   | -0.080961271 | 3.497137109 | -1.250027224 | 0.241500455 | 0.241500455 | -4.939805333 |
| 1457745_at   | -0.106107526 | 6.10413797  | -1.250016404 | 0.241504234 | 0.241504234 | -4.939816321 |
| 1451922_at   | 0.126879216  | 3.993678229 | 1.249998369  | 0.241510533 | 0.241510533 | -4.939834637 |
| 1449707_at   | 0.105440388  | 3.742106313 | 1.249916182  | 0.241539239 | 0.241539239 | -4.9399181   |
| 1439501_at   | -0.074114809 | 6.831102318 | -1.249915849 | 0.241539356 | 0.241539356 | -4.939918438 |
| 1450915_at   | 0.108643774  | 8.600277112 | 1.249889931  | 0.241548409 | 0.241548409 | -4.939944757 |
| 1443311_at   | -0.095721538 | 3.578990602 | -1.249831302 | 0.241568889 | 0.241568889 | -4.940004294 |
| 1446094_at   | 0.08942159   | 7.681986065 | 1.249791716  | 0.241582718 | 0.241582718 | -4.94004449  |
| 1434522_at   | 0.128394466  | 6.396022687 | 1.2497767    | 0.241587964 | 0.241587964 | -4.940059738 |
| 1442235_at   | 0.102577465  | 6.58244868  | 1.249750495  | 0.241597119 | 0.241597119 | -4.940086347 |

|              |              |             |              |             |             |              |
|--------------|--------------|-------------|--------------|-------------|-------------|--------------|
| 1426912_at   | 0.087558943  | 10.75508326 | 1.249742469  | 0.241599923 | 0.241599923 | -4.940094497 |
| 1439976_at   | 0.194281209  | 4.431418683 | 1.249735534  | 0.241602346 | 0.241602346 | -4.940101539 |
| 1442851_at   | 0.122771446  | 4.475727237 | 1.249680295  | 0.241621646 | 0.241621646 | -4.940157628 |
| 1451820_at   | -0.095233486 | 7.067129016 | -1.249580877 | 0.241656385 | 0.241656385 | -4.940258572 |
| 1438300_at   | -0.137449695 | 4.07523174  | -1.249500148 | 0.241684595 | 0.241684595 | -4.940340535 |
| 1456143_at   | 0.0790796    | 6.450553836 | 1.249479139  | 0.241691938 | 0.241691938 | -4.940361865 |
| 1459983_at   | 0.106707048  | 6.014745726 | 1.249465293  | 0.241696776 | 0.241696776 | -4.940375922 |
| 1437336_x_at | 0.086825395  | 11.67052553 | 1.249456556  | 0.24169983  | 0.24169983  | -4.940384792 |
| 1425034_at   | -0.081697711 | 3.245299948 | -1.249395414 | 0.241721199 | 0.241721199 | -4.940446866 |
| 1442949_at   | 0.149437609  | 4.555432639 | 1.248825695  | 0.241920392 | 0.241920392 | -4.941025166 |
| 1444230_at   | -0.103275025 | 3.436274614 | -1.248790964 | 0.24193254  | 0.24193254  | -4.941060414 |
| 1423532_at   | 0.105804472  | 9.544497889 | 1.248742161  | 0.24194961  | 0.24194961  | -4.941109943 |
| 1456730_x_at | 0.115315981  | 8.941249843 | 1.248607019  | 0.241996884 | 0.241996884 | -4.941247088 |
| 1429159_at   | -0.310336101 | 7.17633088  | -1.248263817 | 0.242116975 | 0.242116975 | -4.941595332 |
| 1430703_at   | 0.095230156  | 3.345420996 | 1.248210201  | 0.242135741 | 0.242135741 | -4.94164973  |
| 1436380_at   | 0.092953896  | 7.052515024 | 1.24820285   | 0.242138313 | 0.242138313 | -4.941657188 |
| 1445546_at   | 0.129436976  | 5.433545862 | 1.248093673  | 0.242176529 | 0.242176529 | -4.941767952 |
| 1459195_at   | 0.120438276  | 3.816902217 | 1.248080431  | 0.242181164 | 0.242181164 | -4.941781386 |
| 1458618_at   | 0.179167017  | 6.957615386 | 1.248053463  | 0.242190605 | 0.242190605 | -4.941808744 |
| 1453032_at   | 0.111332412  | 9.642613628 | 1.247926255  | 0.24223514  | 0.24223514  | -4.94193779  |
| 1423484_at   | -0.089545606 | 10.38363478 | -1.247907171 | 0.242241822 | 0.242241822 | -4.941957149 |
| 1424703_at   | -0.080867718 | 6.997476265 | -1.247895499 | 0.242245909 | 0.242245909 | -4.941968988 |
| 1437479_x_at | 0.144698364  | 8.270471848 | 1.247871172  | 0.242254427 | 0.242254427 | -4.941993666 |
| 1441481_at   | 0.095635527  | 3.860982766 | 1.247753724  | 0.242295554 | 0.242295554 | -4.942112799 |
| 1422532_at   | 0.085051364  | 7.842570829 | 1.247648366  | 0.242332452 | 0.242332452 | -4.942219662 |
| 1425395_at   | -0.117631064 | 3.805048035 | -1.247631361 | 0.242338408 | 0.242338408 | -4.942236909 |
| 1437316_at   | -0.091125207 | 5.427499665 | -1.247565436 | 0.242361499 | 0.242361499 | -4.942303773 |
| 1421292_a_at | 0.087131542  | 9.648419863 | 1.247542592  | 0.2423695   | 0.2423695   | -4.942326941 |
| 1417211_a_at | -0.178839704 | 7.563368318 | -1.24753037  | 0.242373781 | 0.242373781 | -4.942339336 |
| 1420493_a_at | -0.085184687 | 8.247285928 | -1.247502725 | 0.242383465 | 0.242383465 | -4.942367374 |
| 1458396_at   | 0.188455525  | 4.218279479 | 1.247377777  | 0.242427238 | 0.242427238 | -4.942494089 |
| 1438912_at   | 0.109037321  | 6.506600714 | 1.247338075  | 0.242441148 | 0.242441148 | -4.942534351 |
| 1458682_at   | -0.107722531 | 3.528690922 | -1.247279739 | 0.242461588 | 0.242461588 | -4.942593508 |
| 1454260_at   | 0.093857194  | 4.911249601 | 1.247207379  | 0.242486943 | 0.242486943 | -4.942666884 |
| 1445808_at   | 0.105281225  | 3.368652392 | 1.247199056  | 0.24248986  | 0.24248986  | -4.942675324 |
| 1425173_s_at | 0.096784902  | 7.476244423 | 1.247122667  | 0.24251663  | 0.24251663  | -4.942752781 |
| 1418397_at   | -0.08149249  | 10.40797273 | -1.24711124  | 0.242520635 | 0.242520635 | -4.942764368 |
| 1433595_at   | -0.111215034 | 7.618107279 | -1.246916676 | 0.24258883  | 0.24258883  | -4.942961638 |
| 1458816_at   | 0.097033173  | 3.799263047 | 1.246916103  | 0.24258903  | 0.24258903  | -4.942962219 |
| 1448492_a_at | 0.078842165  | 9.975420955 | 1.246840989  | 0.242615362 | 0.242615362 | -4.943038373 |
| 1432006_at   | 0.092541719  | 6.082722257 | 1.246534426  | 0.242722855 | 0.242722855 | -4.943349144 |
| 1420259_at   | 0.120388863  | 3.569611769 | 1.246534337  | 0.242722886 | 0.242722886 | -4.943349235 |
| 1418809_at   | 0.148783764  | 3.835203549 | 1.246512844  | 0.242730424 | 0.242730424 | -4.943371021 |
| 1447673_x_at | 0.126489918  | 3.718443003 | 1.246425466  | 0.24276107  | 0.24276107  | -4.943459588 |
| 1436314_at   | 0.090977447  | 7.566950987 | 1.246390399  | 0.24277337  | 0.24277337  | -4.943495132 |
| 1419996_s_at | -0.100619012 | 8.642529194 | -1.246339288 | 0.242791298 | 0.242791298 | -4.943546936 |
| 1424704_at   | -0.172339695 | 11.02041344 | -1.246209667 | 0.24283677  | 0.24283677  | -4.943678307 |
| 1421054_at   | 0.098038513  | 7.962947188 | 1.246101526  | 0.242874713 | 0.242874713 | -4.943787901 |
| 1441372_at   | 0.103440976  | 7.004733689 | 1.246098354  | 0.242875826 | 0.242875826 | -4.943791116 |
| 1452082_at   | 0.101057626  | 5.574246572 | 1.246080486  | 0.242882095 | 0.242882095 | -4.943809224 |
| 1458387_at   | -0.131947059 | 4.745634702 | -1.24599161  | 0.242913282 | 0.242913282 | -4.943899287 |
| 1439307_at   | -0.113618278 | 7.876823608 | -1.245876132 | 0.24295381  | 0.24295381  | -4.944016303 |
| 1428407_at   | 0.076864304  | 11.72701159 | 1.245663867  | 0.243028319 | 0.243028319 | -4.944231376 |

|              |              |             |              |             |             |              |
|--------------|--------------|-------------|--------------|-------------|-------------|--------------|
| 1448587_at   | 0.084987921  | 7.141873701 | 1.245605784  | 0.24304871  | 0.24304871  | -4.944290223 |
| 1443047_at   | 0.089771034  | 3.580500415 | 1.24560509   | 0.243048954 | 0.243048954 | -4.944290926 |
| 1421431_at   | -0.200838286 | 5.599153516 | -1.245528727 | 0.243075765 | 0.243075765 | -4.944368291 |
| 1416996_at   | 0.130988588  | 6.987936039 | 1.245465908  | 0.243097823 | 0.243097823 | -4.944431931 |
| 1440137_at   | 0.097010215  | 4.563327464 | 1.245425395  | 0.243112049 | 0.243112049 | -4.944472973 |
| 1443297_at   | -0.169831821 | 4.610404691 | -1.245379948 | 0.243128009 | 0.243128009 | -4.944519012 |
| 1447877_x_at | 0.098288348  | 7.674503376 | 1.245371063  | 0.243131129 | 0.243131129 | -4.944528013 |
| 1439615_at   | -0.120229531 | 6.609084422 | -1.245365317 | 0.243133147 | 0.243133147 | -4.944533833 |
| 1450903_at   | -0.212536597 | 9.05802938  | -1.245341839 | 0.243141393 | 0.243141393 | -4.944557617 |
| 1418908_at   | 0.122404362  | 9.885352812 | 1.245340875  | 0.243141731 | 0.243141731 | -4.944558593 |
| 1441456_at   | -0.140686973 | 3.816590718 | -1.245294424 | 0.243158045 | 0.243158045 | -4.944605647 |
| 1453780_at   | 0.114002299  | 4.247798465 | 1.245204448  | 0.243189647 | 0.243189647 | -4.944696786 |
| 1447294_at   | 0.09699248   | 6.197852968 | 1.245201146  | 0.243190807 | 0.243190807 | -4.944700131 |
| 1455627_at   | 0.118420128  | 11.0924727  | 1.245084094  | 0.243231925 | 0.243231925 | -4.944818691 |
| 1445162_at   | -0.088332646 | 3.225948583 | -1.244979856 | 0.243268547 | 0.243268547 | -4.944924266 |
| 1424937_at   | -0.12787781  | 4.145291879 | -1.244938678 | 0.243283015 | 0.243283015 | -4.94496597  |
| 1424846_at   | -0.102645741 | 6.012230404 | -1.244882239 | 0.243302847 | 0.243302847 | -4.945023129 |
| 1456898_at   | 0.094796736  | 7.542444925 | 1.244738863  | 0.243353231 | 0.243353231 | -4.945168325 |
| 1416860_s_at | 0.106814276  | 9.465794672 | 1.244681724  | 0.243373313 | 0.243373313 | -4.945226187 |
| 1431193_at   | 0.121627773  | 4.084457764 | 1.244596381  | 0.24340331  | 0.24340331  | -4.945312606 |
| 1444437_at   | 0.148578909  | 4.629119585 | 1.244581324  | 0.243408603 | 0.243408603 | -4.945327852 |
| 1439865_at   | -0.126761247 | 3.488767839 | -1.244541962 | 0.24342244  | 0.24342244  | -4.945367709 |
| 1436003_at   | -0.084415679 | 3.37317255  | -1.244516858 | 0.243431264 | 0.243431264 | -4.945393127 |
| 1423150_at   | 0.613680828  | 5.024775116 | 1.244431857  | 0.243461147 | 0.243461147 | -4.945479192 |
| 1456235_at   | -0.086361077 | 3.192839994 | -1.244430623 | 0.243461581 | 0.243461581 | -4.945480442 |
| 1429084_at   | 0.137315643  | 7.249169073 | 1.244422179  | 0.24346455  | 0.24346455  | -4.945488991 |
| 1421677_at   | 0.1526527    | 4.702853745 | 1.244342912  | 0.24349242  | 0.24349242  | -4.945569246 |
| 1420381_a_at | 0.105218117  | 9.954857988 | 1.244312163  | 0.243503232 | 0.243503232 | -4.945600378 |
| 1435333_at   | 0.106075717  | 7.948567737 | 1.244284467  | 0.243512971 | 0.243512971 | -4.945628418 |
| 1442474_at   | 0.094828849  | 3.779298539 | 1.244167032  | 0.243554268 | 0.243554268 | -4.945747306 |
| 1424992_at   | 0.097568631  | 7.242551034 | 1.244152706  | 0.243559306 | 0.243559306 | -4.945761809 |
| 1427658_at   | 0.121895812  | 5.668691393 | 1.244135083  | 0.243565504 | 0.243565504 | -4.945779649 |
| 1416081_at   | 0.133440144  | 8.177724292 | 1.244126914  | 0.243568377 | 0.243568377 | -4.945787918 |
| 1432980_at   | 0.131548371  | 3.394841499 | 1.244099073  | 0.243578169 | 0.243578169 | -4.945816103 |
| 1440873_at   | 0.122213131  | 5.666717916 | 1.24408831   | 0.243581954 | 0.243581954 | -4.945826998 |
| 1442995_at   | -0.11832516  | 5.682554072 | -1.244067832 | 0.243589157 | 0.243589157 | -4.945847728 |
| 1441015_at   | -0.079976365 | 3.268184327 | -1.244035144 | 0.243600654 | 0.243600654 | -4.945880817 |
| 1452569_at   | -0.092273578 | 3.664826404 | -1.243930117 | 0.243637599 | 0.243637599 | -4.94598713  |
| 1458063_at   | 0.079870348  | 3.259251452 | 1.243855455  | 0.243663865 | 0.243663865 | -4.946062702 |
| 1439716_at   | -0.108977472 | 3.676285801 | -1.24381921  | 0.243676617 | 0.243676617 | -4.946099389 |
| 1427790_at   | 0.092766006  | 7.125495816 | 1.243816818  | 0.243677458 | 0.243677458 | -4.94610181  |
| 1436674_at   | -0.132598516 | 4.82353258  | -1.243759623 | 0.243697582 | 0.243697582 | -4.946159698 |
| 1434848_at   | 0.082944317  | 8.985947639 | 1.243692988  | 0.243721028 | 0.243721028 | -4.94622714  |
| 1448510_at   | 0.106234317  | 7.542246165 | 1.243667767  | 0.243729903 | 0.243729903 | -4.946252665 |
| 1456418_at   | -0.158734574 | 5.688992039 | -1.243616342 | 0.243748    | 0.243748    | -4.94630471  |
| 1422101_at   | -0.120854837 | 4.768546114 | -1.243605966 | 0.243751652 | 0.243751652 | -4.946315211 |
| 1428245_at   | -0.102687962 | 8.203625179 | -1.243603555 | 0.2437525   | 0.2437525   | -4.946317651 |
| 1438630_x_at | 0.108186031  | 10.47309529 | 1.243562931  | 0.243766797 | 0.243766797 | -4.946358764 |
| 1424600_at   | -0.137894379 | 4.836844423 | -1.243561163 | 0.243767419 | 0.243767419 | -4.946360553 |
| 1456941_at   | 0.110104073  | 6.332097487 | 1.24349417   | 0.243790997 | 0.243790997 | -4.94642835  |
| 1442742_at   | -0.117530836 | 3.647157915 | -1.24348362  | 0.24379471  | 0.24379471  | -4.946439025 |
| 1416498_at   | -0.087371942 | 11.08033498 | -1.243397904 | 0.243824881 | 0.243824881 | -4.946525765 |
| 1426006_at   | 0.087405081  | 6.130710085 | 1.243296316  | 0.243860643 | 0.243860643 | -4.946628562 |

|              |              |             |              |             |             |              |
|--------------|--------------|-------------|--------------|-------------|-------------|--------------|
| 1429559_at   | -0.087138015 | 9.311265818 | -1.243290239 | 0.243862783 | 0.243862783 | -4.946634711 |
| 1436394_at   | -0.090806716 | 7.347635092 | -1.243171349 | 0.24390464  | 0.24390464  | -4.946755007 |
| 1446149_at   | 0.133861741  | 4.920406867 | 1.243091406  | 0.24393279  | 0.24393279  | -4.946835892 |
| 1446433_at   | -0.10306005  | 5.872839747 | -1.243067567 | 0.243941184 | 0.243941184 | -4.946860011 |
| 1430959_at   | 0.112538387  | 4.665423252 | 1.242961012  | 0.243978709 | 0.243978709 | -4.946967813 |
| 1446696_at   | -0.117048654 | 4.255382982 | -1.242954754 | 0.243980913 | 0.243980913 | -4.946974144 |
| 1420345_at   | -0.150516431 | 5.007644423 | -1.242932493 | 0.243988753 | 0.243988753 | -4.946996665 |
| 1454334_at   | -0.122334234 | 3.464129863 | -1.242906066 | 0.243998061 | 0.243998061 | -4.9470234   |
| 1459408_at   | -0.128154981 | 5.514786023 | -1.242859105 | 0.244014602 | 0.244014602 | -4.947070908 |
| 1446625_at   | 0.169990354  | 5.82513354  | 1.242851272  | 0.244017361 | 0.244017361 | -4.947078832 |
| 1433951_at   | -0.09661062  | 10.97998626 | -1.242810746 | 0.244031635 | 0.244031635 | -4.947119828 |
| 1416602_a_at | 0.168741344  | 6.880831977 | 1.242803177  | 0.244034302 | 0.244034302 | -4.947127485 |
| 1440963_at   | -0.131715165 | 4.927783433 | -1.242793183 | 0.244037822 | 0.244037822 | -4.947137594 |
| 1422056_at   | -0.140999373 | 5.684191928 | -1.242731823 | 0.244059437 | 0.244059437 | -4.947199664 |
| 1456725_x_at | -0.090419794 | 8.953144435 | -1.242599869 | 0.244105926 | 0.244105926 | -4.947333139 |
| 1444441_at   | 0.085706899  | 5.130748265 | 1.242513621  | 0.244136316 | 0.244136316 | -4.947420374 |
| 1457718_at   | -0.130000979 | 6.033918239 | -1.242508197 | 0.244138227 | 0.244138227 | -4.947425861 |
| 1455464_x_at | -0.211411733 | 7.608754104 | -1.242466763 | 0.244152828 | 0.244152828 | -4.947467768 |
| 1448590_at   | -0.108306442 | 11.3426579  | -1.242434333 | 0.244164256 | 0.244164256 | -4.947500568 |
| 1423234_at   | 0.080179419  | 9.141668143 | 1.242423642  | 0.244168024 | 0.244168024 | -4.94751138  |
| 1448560_at   | 0.090646193  | 5.790038982 | 1.242363083  | 0.244189366 | 0.244189366 | -4.947572627 |
| 1451258_at   | -0.132118654 | 5.426987027 | -1.242339912 | 0.244197532 | 0.244197532 | -4.947596061 |
| 1454880_s_at | 0.099530549  | 8.577528911 | 1.242331262  | 0.244200581 | 0.244200581 | -4.947604809 |
| 1416529_at   | 0.104377434  | 10.65576517 | 1.242165481  | 0.244259016 | 0.244259016 | -4.947772462 |
| 1426473_at   | 0.077487479  | 10.36275781 | 1.242133361  | 0.244270339 | 0.244270339 | -4.947804943 |
| 1444567_at   | -0.091470558 | 4.372107268 | -1.242036469 | 0.244304498 | 0.244304498 | -4.947902919 |
| 1417581_at   | 0.124948975  | 7.245523847 | 1.242015314  | 0.244311957 | 0.244311957 | -4.947924311 |
| 1418658_at   | 0.120497159  | 8.179260097 | 1.24179259   | 0.244390496 | 0.244390496 | -4.948149507 |
| 1449788_at   | -0.095592844 | 3.212560667 | -1.24173271  | 0.244411614 | 0.244411614 | -4.948210046 |
| 1446691_at   | 0.093453932  | 3.294612915 | 1.241697631  | 0.244423987 | 0.244423987 | -4.948245511 |
| 1429475_at   | 0.108276517  | 6.911837708 | 1.241674292  | 0.244432219 | 0.244432219 | -4.948269106 |
| 1418830_at   | -0.080784421 | 4.814404107 | -1.24166267  | 0.244436318 | 0.244436318 | -4.948280856 |
| 1432838_at   | 0.091694364  | 3.387455456 | 1.241488428  | 0.244497784 | 0.244497784 | -4.948457    |
| 1432257_at   | -0.091023426 | 4.854599353 | -1.241379921 | 0.244536068 | 0.244536068 | -4.948566682 |
| 1424023_at   | 0.094137788  | 7.499596763 | 1.241362139  | 0.244542343 | 0.244542343 | -4.948584657 |
| 1443051_at   | -0.108633523 | 6.363331026 | -1.241311031 | 0.244560376 | 0.244560376 | -4.948636316 |
| 1436014_a_at | 0.125759991  | 7.760657064 | 1.241271529  | 0.244574316 | 0.244574316 | -4.948676243 |
| 1450804_at   | 0.215846622  | 5.57825735  | 1.241257372  | 0.244579312 | 0.244579312 | -4.948690552 |
| 1457075_at   | 0.091472876  | 6.316095617 | 1.241051429  | 0.244651997 | 0.244651997 | -4.948898695 |
| 1423606_at   | 0.087236051  | 13.32440796 | 1.24104946   | 0.244652692 | 0.244652692 | -4.948900685 |
| 1456327_at   | -0.107340343 | 4.219644169 | -1.241000107 | 0.244670113 | 0.244670113 | -4.948950561 |
| 1451563_at   | -0.090837384 | 3.440837705 | -1.240933637 | 0.244693579 | 0.244693579 | -4.949017735 |
| 1431996_at   | 0.089032506  | 3.642881321 | 1.240894055  | 0.244707552 | 0.244707552 | -4.949057734 |
| 1427957_at   | -0.112497728 | 3.796769196 | -1.240800991 | 0.24474041  | 0.24474041  | -4.949151777 |
| 1453673_at   | -0.095960097 | 3.646729132 | -1.240731869 | 0.244764817 | 0.244764817 | -4.949221623 |
| 1418881_at   | -0.11943812  | 7.030715148 | -1.240684254 | 0.244781631 | 0.244781631 | -4.949269734 |
| 1453217_at   | -0.111660303 | 3.355353516 | -1.240523303 | 0.244838474 | 0.244838474 | -4.949432356 |
| 1436867_at   | -0.31411144  | 7.662063591 | -1.240410161 | 0.244878438 | 0.244878438 | -4.949546663 |
| 1427943_at   | -0.138516329 | 6.798755071 | -1.240293386 | 0.244919692 | 0.244919692 | -4.949664635 |
| 1452449_at   | -0.096704203 | 6.296857868 | -1.240256459 | 0.244932738 | 0.244932738 | -4.949701938 |
| 1428339_at   | 0.097948181  | 9.011561187 | 1.240251985  | 0.244934319 | 0.244934319 | -4.949706458 |
| 1426307_at   | 0.080687665  | 8.822520017 | 1.240193236  | 0.244955076 | 0.244955076 | -4.949765804 |
| 1421995_at   | 0.125219033  | 5.11282735  | 1.240089291  | 0.244991807 | 0.244991807 | -4.949870802 |

|              |              |             |              |             |             |              |
|--------------|--------------|-------------|--------------|-------------|-------------|--------------|
| 1426286_at   | 0.082377909  | 7.352030709 | 1.239947434  | 0.24504194  | 0.24504194  | -4.950014085 |
| 1458232_at   | 0.289389856  | 5.693902402 | 1.239930541  | 0.245047911 | 0.245047911 | -4.950031148 |
| 1421937_at   | 0.126781424  | 6.688927006 | 1.239765584  | 0.245106221 | 0.245106221 | -4.950197748 |
| 1428457_at   | 0.116551116  | 8.451428871 | 1.239714947  | 0.245124122 | 0.245124122 | -4.950248886 |
| 1438278_a_at | 0.099479326  | 7.913582659 | 1.239677631  | 0.245137315 | 0.245137315 | -4.95028657  |
| 1449746_s_at | 0.116653871  | 4.891501004 | 1.239641365  | 0.245150138 | 0.245150138 | -4.950323194 |
| 1418880_at   | 0.101849173  | 7.214905451 | 1.239605367  | 0.245162865 | 0.245162865 | -4.950359546 |
| 1439564_at   | -0.112261315 | 4.176497532 | -1.239602192 | 0.245163988 | 0.245163988 | -4.950362752 |
| 1453640_at   | -0.119572271 | 4.891365832 | -1.239514738 | 0.245194912 | 0.245194912 | -4.950451063 |
| 1420564_at   | -0.107054236 | 4.902477049 | -1.239512007 | 0.245195878 | 0.245195878 | -4.950453821 |
| 1452056_s_at | 0.090878346  | 9.152717053 | 1.239492003  | 0.245202952 | 0.245202952 | -4.95047402  |
| 1432891_at   | -0.094359259 | 4.195205807 | -1.239447243 | 0.245218781 | 0.245218781 | -4.950519217 |
| 1416326_at   | 0.147255906  | 9.751727864 | 1.239414356  | 0.245230411 | 0.245230411 | -4.950552424 |
| 1428607_at   | 0.139816416  | 5.424388504 | 1.239371336  | 0.245245626 | 0.245245626 | -4.950595862 |
| 1438739_at   | 0.155737142  | 8.813788725 | 1.239214077  | 0.245301251 | 0.245301251 | -4.950754639 |
| 1445400_at   | 0.134805154  | 6.18149684  | 1.239209032  | 0.245303036 | 0.245303036 | -4.950759732 |
| 1422571_at   | -0.110484192 | 10.07199895 | -1.239188696 | 0.24531023  | 0.24531023  | -4.950780263 |
| 1450605_at   | -0.128903403 | 5.346264003 | -1.239156801 | 0.245321513 | 0.245321513 | -4.950812464 |
| 1459777_at   | -0.079525778 | 3.198464007 | -1.239051747 | 0.24535868  | 0.24535868  | -4.950918522 |
| 1416555_at   | 0.096918536  | 9.907801814 | 1.239020884  | 0.2453696   | 0.2453696   | -4.950949679 |
| 1443873_at   | -0.105062325 | 4.771426716 | -1.23900722  | 0.245374435 | 0.245374435 | -4.950963473 |
| 1420615_at   | 0.098389549  | 6.772804234 | 1.238914188  | 0.245407355 | 0.245407355 | -4.951057386 |
| 1459391_at   | 0.16478633   | 5.831954144 | 1.238877831  | 0.245420221 | 0.245420221 | -4.951094085 |
| 1457817_at   | 0.12916383   | 4.101351844 | 1.238811401  | 0.24544373  | 0.24544373  | -4.95116114  |
| 1421495_a_at | 0.133328635  | 6.562551568 | 1.238745124  | 0.245467188 | 0.245467188 | -4.951228039 |
| 1452630_at   | -0.149218708 | 5.572252092 | -1.238715886 | 0.245477536 | 0.245477536 | -4.951257549 |
| 1446607_at   | 0.167812967  | 5.668363068 | 1.238588365  | 0.245522676 | 0.245522676 | -4.951386256 |
| 1447304_at   | -0.099812187 | 5.279525326 | -1.238563793 | 0.245531375 | 0.245531375 | -4.951411056 |
| 1452537_at   | -0.098889743 | 4.353647398 | -1.238510175 | 0.245550358 | 0.245550358 | -4.95146517  |
| 1424486_a_at | 0.090955245  | 7.368459016 | 1.238454235  | 0.245570163 | 0.245570163 | -4.951521625 |
| 1453778_at   | -0.096390881 | 6.741269282 | -1.238346736 | 0.245608227 | 0.245608227 | -4.951630108 |
| 1457760_at   | 0.096519028  | 7.703304794 | 1.238276582  | 0.24563307  | 0.24563307  | -4.951700901 |
| 1446838_at   | 0.175686759  | 5.794809313 | 1.238182353  | 0.245666442 | 0.245666442 | -4.951795985 |
| 1435507_x_at | -0.08428598  | 5.399812391 | -1.238167522 | 0.245671695 | 0.245671695 | -4.95181095  |
| 1459568_at   | 0.11068248   | 6.224515699 | 1.238066771  | 0.245707382 | 0.245707382 | -4.951912608 |
| 1422981_at   | 0.133441197  | 6.483733083 | 1.238048136  | 0.245713983 | 0.245713983 | -4.95193141  |
| 1459120_at   | 0.103322127  | 5.200078578 | 1.237953222  | 0.245747606 | 0.245747606 | -4.952027172 |
| 1458228_at   | -0.108514095 | 3.42181184  | -1.237908652 | 0.245763397 | 0.245763397 | -4.952072139 |
| 1435125_at   | 0.142696324  | 3.79970402  | 1.237893651  | 0.245768711 | 0.245768711 | -4.952087273 |
| 1452148_at   | 0.10876423   | 8.172803831 | 1.237855897  | 0.245782088 | 0.245782088 | -4.952125362 |
| 1439015_at   | -0.122741999 | 6.844032833 | -1.237831798 | 0.245790626 | 0.245790626 | -4.952149674 |
| 1457577_at   | -0.206130848 | 6.176732694 | -1.237741387 | 0.245822663 | 0.245822663 | -4.952240883 |
| 1431060_at   | 0.464193386  | 6.78000216  | 1.237738881  | 0.245823551 | 0.245823551 | -4.952243411 |
| 1431537_at   | -0.101273214 | 3.551717844 | -1.237630014 | 0.245862132 | 0.245862132 | -4.952353232 |
| 1435730_at   | -0.131241743 | 6.644205648 | -1.237497709 | 0.245909025 | 0.245909025 | -4.952486688 |
| 1457831_at   | -0.079007004 | 5.096434725 | -1.237351949 | 0.245960696 | 0.245960696 | -4.952633705 |
| 1434249_s_at | -0.153123945 | 3.178327854 | -1.237232483 | 0.246003052 | 0.246003052 | -4.952754191 |
| 1438378_at   | -0.131462074 | 3.720900185 | -1.237228949 | 0.246004306 | 0.246004306 | -4.952757756 |
| 1416910_at   | -0.095709296 | 9.241590837 | -1.237226438 | 0.246005196 | 0.246005196 | -4.952760288 |
| 1452451_at   | 0.108741435  | 4.283869251 | 1.237209667  | 0.246011143 | 0.246011143 | -4.952777202 |
| 1425679_a_at | 0.164010719  | 6.770164204 | 1.237201068  | 0.246014192 | 0.246014192 | -4.952785873 |
| 1427240_at   | 0.100053603  | 7.780501373 | 1.237083016  | 0.246056054 | 0.246056054 | -4.952904925 |
| 1447841_x_at | -0.106805503 | 7.460302607 | -1.237005628 | 0.2460835   | 0.2460835   | -4.952982964 |



|              |              |             |              |             |             |              |
|--------------|--------------|-------------|--------------|-------------|-------------|--------------|
| 1415927_at   | -0.70432161  | 10.78775967 | -1.236895723 | 0.246122483 | 0.246122483 | -4.953093787 |
| 1460462_at   | -0.084866247 | 8.792959714 | -1.236867365 | 0.246132542 | 0.246132542 | -4.953122382 |
| 1443850_at   | 0.14533891   | 4.526124141 | 1.236812739  | 0.24615192  | 0.24615192  | -4.953177461 |
| 1442420_at   | -0.083268758 | 5.625143202 | -1.236693832 | 0.246194105 | 0.246194105 | -4.953297348 |
| 1417729_at   | -0.10259742  | 3.100312999 | -1.23658442  | 0.246232926 | 0.246232926 | -4.953407655 |
| 1437875_at   | 0.088401661  | 9.788674571 | 1.236560972  | 0.246241247 | 0.246241247 | -4.953431295 |
| 1449409_at   | -0.092019987 | 4.474086848 | -1.236558483 | 0.24624213  | 0.24624213  | -4.953433804 |
| 1427949_at   | 0.09120635   | 8.215715221 | 1.236554429  | 0.246243569 | 0.246243569 | -4.953437891 |
| 1449176_a_at | 0.121669767  | 7.154718249 | 1.236408491  | 0.24629536  | 0.24629536  | -4.95358501  |
| 1432324_at   | -0.10938215  | 4.568112189 | -1.23638189  | 0.246304801 | 0.246304801 | -4.953611825 |
| 1457150_at   | 0.101354074  | 7.453983869 | 1.236312083  | 0.246329579 | 0.246329579 | -4.953682193 |
| 1427923_at   | 0.07859909   | 9.182706144 | 1.236239297  | 0.246355416 | 0.246355416 | -4.953755556 |
| 1455013_at   | 0.086115207  | 8.407141747 | 1.236208893  | 0.246366209 | 0.246366209 | -4.953786206 |
| 1421111_at   | 0.101960695  | 7.255125302 | 1.236202716  | 0.246368402 | 0.246368402 | -4.953792432 |
| 1436280_at   | -0.083615253 | 5.389896248 | -1.236060322 | 0.246418957 | 0.246418957 | -4.953935951 |
| 1425126_at   | -0.097324658 | 4.715364371 | -1.235956179 | 0.246455936 | 0.246455936 | -4.95404091  |
| 1425101_a_at | -0.099243308 | 6.381982733 | -1.235855052 | 0.246491849 | 0.246491849 | -4.954142824 |
| 1434035_at   | -0.157584458 | 8.13396577  | -1.235830854 | 0.246500443 | 0.246500443 | -4.954167209 |
| 1442374_at   | 0.083027449  | 3.94499087  | 1.235811587  | 0.246507286 | 0.246507286 | -4.954186626 |
| 1443537_at   | -0.132263548 | 3.495326571 | -1.235744998 | 0.246530937 | 0.246530937 | -4.954253727 |
| 1448236_at   | -0.100439797 | 11.2807341  | -1.235726794 | 0.246537403 | 0.246537403 | -4.954272072 |
| 1443133_at   | 0.111005773  | 5.6016871   | 1.235715113  | 0.246541552 | 0.246541552 | -4.954283841 |
| 1444685_at   | -0.195627464 | 5.10280353  | -1.235483248 | 0.246623924 | 0.246623924 | -4.954517471 |
| 1416766_at   | 0.084168354  | 10.06608182 | 1.235332697  | 0.24667742  | 0.24667742  | -4.954669151 |
| 1442422_at   | -0.079427987 | 7.045773337 | -1.23532028  | 0.246681832 | 0.246681832 | -4.95468166  |
| 1429613_at   | 0.124516538  | 6.668814325 | 1.23518979   | 0.246728208 | 0.246728208 | -4.954813118 |
| 1443040_x_at | -0.114219061 | 3.801466957 | -1.235135787 | 0.246747403 | 0.246747403 | -4.95486752  |
| 1446344_at   | 0.134720412  | 4.735938956 | 1.235107839  | 0.246757337 | 0.246757337 | -4.954895673 |
| 1426209_at   | -0.099170579 | 9.833102192 | -1.234985309 | 0.246800895 | 0.246800895 | -4.955019098 |
| 1423892_at   | 0.086446268  | 7.473041472 | 1.234960864  | 0.246809586 | 0.246809586 | -4.95504372  |
| 1456890_at   | 0.091125654  | 5.425004472 | 1.234874494  | 0.246840294 | 0.246840294 | -4.955130714 |
| 1434309_at   | -0.1272417   | 8.64544436  | -1.234853352 | 0.246847811 | 0.246847811 | -4.955152009 |
| 1427851_x_at | 0.105391232  | 3.778042319 | 1.234709508  | 0.246898962 | 0.246898962 | -4.955296882 |
| 1457290_at   | -0.111838565 | 5.132320877 | -1.234694169 | 0.246904417 | 0.246904417 | -4.955312329 |
| 1448882_at   | 0.072901769  | 9.436372988 | 1.234653885  | 0.246918743 | 0.246918743 | -4.955352899 |
| 1437748_at   | 0.092891787  | 7.983340521 | 1.23441112   | 0.247005095 | 0.247005095 | -4.955597368 |
| 1456747_x_at | -0.14957368  | 4.69903058  | -1.234343252 | 0.24702924  | 0.24702924  | -4.955665706 |
| 1456325_at   | 0.128775587  | 7.110002426 | 1.234264949  | 0.2470571   | 0.2470571   | -4.955744548 |
| 1438091_a_at | 0.120165964  | 11.63177865 | 1.234216995  | 0.247074164 | 0.247074164 | -4.955792831 |
| 1418804_at   | 0.080132579  | 3.322042342 | 1.23418572   | 0.247085292 | 0.247085292 | -4.955824319 |
| 1419527_at   | -0.186844433 | 4.507066913 | -1.234070756 | 0.247126205 | 0.247126205 | -4.955940064 |
| 1458356_at   | 0.087942957  | 4.198149097 | 1.233993104  | 0.247153842 | 0.247153842 | -4.95601824  |
| 1425642_at   | -0.145137056 | 5.70592295  | -1.233910513 | 0.24718324  | 0.24718324  | -4.956101383 |
| 1443026_at   | 0.125996664  | 7.416457904 | 1.233871201  | 0.247197233 | 0.247197233 | -4.956140957 |
| 1432498_at   | -0.123476547 | 4.330873455 | -1.233848901 | 0.247205172 | 0.247205172 | -4.956163405 |
| 1436488_at   | -0.109927037 | 3.532726288 | -1.233845304 | 0.247206452 | 0.247206452 | -4.956167026 |
| 1423573_at   | 0.102033179  | 7.56669201  | 1.233743284  | 0.247242772 | 0.247242772 | -4.956269719 |
| 1429237_at   | 0.082958005  | 9.564838301 | 1.233688443  | 0.247262298 | 0.247262298 | -4.95632492  |
| 1420257_at   | -0.101584414 | 4.003714155 | -1.233617262 | 0.247287644 | 0.247287644 | -4.956396566 |
| 1424532_at   | -0.084859227 | 9.021008678 | -1.233583292 | 0.24729974  | 0.24729974  | -4.956430757 |
| 1440096_at   | 0.081300123  | 3.43781629  | 1.233529022  | 0.247319066 | 0.247319066 | -4.956485378 |
| 1440228_at   | 0.093942975  | 7.078905715 | 1.233441667  | 0.247350177 | 0.247350177 | -4.956573295 |
| 1420653_at   | -0.118179234 | 7.708865194 | -1.233441122 | 0.247350371 | 0.247350371 | -4.956573843 |

|              |              |             |              |             |             |              |
|--------------|--------------|-------------|--------------|-------------|-------------|--------------|
| 1453343_s_at | 0.089092504  | 7.429625186 | 1.233440752  | 0.247350502 | 0.247350502 | -4.956574215 |
| 1448624_at   | -0.100614067 | 8.352270885 | -1.233220691 | 0.247428889 | 0.247428889 | -4.956795674 |
| 1432380_s_at | -0.090003483 | 4.233656543 | -1.233153366 | 0.247452874 | 0.247452874 | -4.95686342  |
| 1455724_at   | -0.087219106 | 8.786155568 | -1.233119172 | 0.247465058 | 0.247465058 | -4.956897829 |
| 1429448_s_at | 0.114377229  | 7.707200754 | 1.233065423  | 0.247484208 | 0.247484208 | -4.956951911 |
| 1460200_s_at | 0.081023196  | 7.618063566 | 1.233035017  | 0.247495043 | 0.247495043 | -4.956982505 |
| 1439402_at   | -0.082896404 | 3.274544733 | -1.233002037 | 0.247506795 | 0.247506795 | -4.957015689 |
| 1436665_a_at | -0.125511095 | 9.192884102 | -1.232951734 | 0.24752472  | 0.24752472  | -4.957066302 |
| 1447198_at   | -0.105171544 | 3.97849511  | -1.232928797 | 0.247532894 | 0.247532894 | -4.957089379 |
| 1448704_s_at | -0.081671219 | 10.73540007 | -1.232740789 | 0.247599902 | 0.247599902 | -4.957278529 |
| 1426851_a_at | 0.340308978  | 6.093988137 | 1.232712043  | 0.247610149 | 0.247610149 | -4.957307448 |
| 1419613_at   | 0.111681017  | 7.577950709 | 1.232674773  | 0.247623435 | 0.247623435 | -4.95734494  |
| 1447571_at   | -0.092086223 | 6.743421409 | -1.23261901  | 0.247643314 | 0.247643314 | -4.957401037 |
| 1428269_a_at | -0.140746955 | 10.19338906 | -1.23256366  | 0.247663047 | 0.247663047 | -4.957456715 |
| 1453529_at   | 0.087847012  | 3.364989472 | 1.23254125   | 0.247671037 | 0.247671037 | -4.957479258 |
| 1426265_x_at | -0.081394498 | 8.931520042 | -1.232533736 | 0.247673716 | 0.247673716 | -4.957486816 |
| 1441276_at   | -0.096221692 | 3.257992384 | -1.232454009 | 0.247702143 | 0.247702143 | -4.957567012 |
| 1420502_at   | 0.080405421  | 8.817064692 | 1.232427519  | 0.247711588 | 0.247711588 | -4.957593657 |
| 1419457_at   | 0.088350029  | 7.884350812 | 1.232424843  | 0.247712543 | 0.247712543 | -4.957596349 |
| 1450872_s_at | -0.148346937 | 8.587510061 | -1.232379732 | 0.247728629 | 0.247728629 | -4.957641722 |
| 1438389_x_at | 0.081461219  | 3.070464645 | 1.232224928  | 0.247783837 | 0.247783837 | -4.957797421 |
| 1439011_at   | 0.14418474   | 4.980021126 | 1.232220103  | 0.247785558 | 0.247785558 | -4.957802273 |
| 1456408_x_at | -0.088856457 | 8.02881674  | -1.232107514 | 0.247825718 | 0.247825718 | -4.957915503 |
| 1422282_at   | 0.116969573  | 4.777476922 | 1.232071802  | 0.247838457 | 0.247838457 | -4.957951418 |
| 1436894_at   | -0.101733624 | 3.923323085 | -1.231971965 | 0.247874074 | 0.247874074 | -4.958051816 |
| 1456928_at   | -0.086172327 | 6.314762194 | -1.231917024 | 0.247893676 | 0.247893676 | -4.958107063 |
| 1455474_at   | 0.176558874  | 5.012256422 | 1.231903241  | 0.247898594 | 0.247898594 | -4.958120922 |
| 1452958_at   | -0.106879645 | 7.628550292 | -1.231810543 | 0.24793167  | 0.24793167  | -4.958214133 |
| 1437828_s_at | 0.08761535   | 8.57251939  | 1.231636617  | 0.247993741 | 0.247993741 | -4.958389008 |
| 1418035_a_at | 0.578225156  | 6.834311905 | 1.231577945  | 0.248014682 | 0.248014682 | -4.958447995 |
| 1443406_at   | 0.124574823  | 6.971431826 | 1.2315705    | 0.248017339 | 0.248017339 | -4.95845548  |
| 1456234_at   | 0.095360529  | 5.212339201 | 1.23153845   | 0.24802878  | 0.24802878  | -4.958487703 |
| 1428588_a_at | 0.095678508  | 9.628374743 | 1.23152255   | 0.248034455 | 0.248034455 | -4.958503687 |
| 1457743_at   | 0.130243081  | 5.954441903 | 1.231387749  | 0.248082578 | 0.248082578 | -4.958639203 |
| 1427920_at   | -0.120082948 | 6.17649996  | -1.231235529 | 0.248136928 | 0.248136928 | -4.958792219 |
| 1428439_at   | 0.081590502  | 5.665096952 | 1.231216011  | 0.248143897 | 0.248143897 | -4.958811837 |
| 1441728_at   | -0.098780454 | 3.648793085 | -1.231119483 | 0.248178368 | 0.248178368 | -4.958908862 |
| 1456393_at   | -0.110008741 | 10.81369297 | -1.231053331 | 0.248201994 | 0.248201994 | -4.958975351 |
| 1447408_at   | 0.161560775  | 8.14524351  | 1.231015144  | 0.248215633 | 0.248215633 | -4.959013732 |
| 1420942_s_at | 0.151404401  | 6.249756281 | 1.230983985  | 0.248226763 | 0.248226763 | -4.959045048 |
| 1445800_at   | 0.129324335  | 3.500501623 | 1.230899633  | 0.248256894 | 0.248256894 | -4.959129823 |
| 1421147_at   | 0.07549289   | 9.321114095 | 1.230849381  | 0.248274845 | 0.248274845 | -4.959180325 |
| 1431656_at   | -0.097675494 | 3.703784851 | -1.230840627 | 0.248277972 | 0.248277972 | -4.959189123 |
| 1454414_at   | -0.109960996 | 4.19164249  | -1.230818771 | 0.24828578  | 0.24828578  | -4.959211087 |
| 1457144_at   | -0.107428705 | 4.373990806 | -1.230809651 | 0.248289039 | 0.248289039 | -4.959220252 |
| 1440119_at   | -0.101433831 | 6.232688396 | -1.230705327 | 0.248326312 | 0.248326312 | -4.959325089 |
| 1449823_at   | -0.12279556  | 5.243624203 | -1.23065526  | 0.248344201 | 0.248344201 | -4.9593754   |
| 1424103_at   | 0.100926968  | 8.478526459 | 1.230529442  | 0.248389162 | 0.248389162 | -4.959501824 |
| 1432846_at   | 0.08745089   | 3.922168421 | 1.230226469  | 0.248497457 | 0.248497457 | -4.959806223 |
| 1455586_at   | 0.124176787  | 5.645167752 | 1.23021369   | 0.248502026 | 0.248502026 | -4.95981906  |
| 1433695_at   | 0.078347293  | 8.947909468 | 1.230087851  | 0.248547018 | 0.248547018 | -4.959945475 |
| 1436041_at   | 0.411709625  | 5.421569797 | 1.23003397   | 0.248566284 | 0.248566284 | -4.9599996   |
| 1427709_at   | 0.081970059  | 6.075196896 | 1.229985351  | 0.24858367  | 0.24858367  | -4.960048438 |

|              |              |             |              |             |             |              |
|--------------|--------------|-------------|--------------|-------------|-------------|--------------|
| 1430373_at   | -0.120741815 | 3.683768354 | -1.229976351 | 0.248586888 | 0.248586888 | -4.960057478 |
| 1426387_x_at | -0.177024522 | 9.31100094  | -1.229954816 | 0.24859459  | 0.24859459  | -4.96007911  |
| 1440225_at   | -0.105016734 | 4.367492454 | -1.229876431 | 0.248622623 | 0.248622623 | -4.960157843 |
| 1421696_at   | 0.135497772  | 3.821790058 | 1.229872491  | 0.248624032 | 0.248624032 | -4.960161801 |
| 1421339_at   | -0.231295543 | 5.05477023  | -1.229871103 | 0.248624529 | 0.248624529 | -4.960163195 |
| 1443004_at   | -0.089931209 | 3.278325728 | -1.229658776 | 0.248700477 | 0.248700477 | -4.960376448 |
| 1459335_at   | 0.077217183  | 4.813486533 | 1.229610203  | 0.248717854 | 0.248717854 | -4.960425229 |
| 1422998_a_at | 0.120625382  | 9.355610782 | 1.229469638  | 0.248768147 | 0.248768147 | -4.960566389 |
| 1421438_at   | 0.107003297  | 3.406323423 | 1.229442611  | 0.248777818 | 0.248777818 | -4.960593529 |
| 1419470_at   | 0.081353374  | 9.425407001 | 1.229405509  | 0.248791095 | 0.248791095 | -4.960630786 |
| 1416211_a_at | 0.080257181  | 11.38199205 | 1.229359454  | 0.248807576 | 0.248807576 | -4.960677031 |
| 1442568_at   | -0.482650516 | 6.136906514 | -1.229347624 | 0.24881181  | 0.24881181  | -4.960688911 |
| 1454407_at   | -0.110955988 | 4.745808107 | -1.229327673 | 0.24881895  | 0.24881895  | -4.960708944 |
| 1454618_at   | -0.094179853 | 6.655574697 | -1.229274732 | 0.248837897 | 0.248837897 | -4.960762102 |
| 1422614_s_at | 0.079941659  | 8.77816375  | 1.229247313  | 0.24884771  | 0.24884771  | -4.960789633 |
| 1455779_at   | 0.09846902   | 5.6182912   | 1.229178392  | 0.248872379 | 0.248872379 | -4.960858833 |
| 1443588_at   | 0.079162574  | 4.157020397 | 1.229159082  | 0.248879291 | 0.248879291 | -4.960878221 |
| 1438308_at   | 0.088829728  | 4.557518028 | 1.228961669  | 0.248949963 | 0.248949963 | -4.961076418 |
| 1426542_at   | -0.09182771  | 5.854037407 | -1.22892723  | 0.248962294 | 0.248962294 | -4.961110991 |
| 1460312_at   | -0.106772909 | 4.423992495 | -1.228926311 | 0.248962623 | 0.248962623 | -4.961111913 |
| 1460438_at   | 0.0788071    | 6.389360031 | 1.228883546  | 0.248977936 | 0.248977936 | -4.961154845 |
| 1454862_at   | -0.106621216 | 10.15949224 | -1.228833275 | 0.248995936 | 0.248995936 | -4.961205309 |
| 1460198_a_at | 0.079466256  | 10.55625286 | 1.22869913   | 0.249043976 | 0.249043976 | -4.961339964 |
| 1451369_at   | -0.108168412 | 8.201611305 | -1.228629978 | 0.249068743 | 0.249068743 | -4.961409375 |
| 1447427_at   | -0.08592444  | 3.622102976 | -1.22858678  | 0.249084216 | 0.249084216 | -4.961452733 |
| 1420182_x_at | 0.15053315   | 4.83604222  | 1.228536624  | 0.249102182 | 0.249102182 | -4.961503075 |
| 1431244_s_at | -0.116747094 | 5.759370486 | -1.228534387 | 0.249102983 | 0.249102983 | -4.96150532  |
| 1445923_at   | 0.113056744  | 3.644484584 | 1.228508583  | 0.249112227 | 0.249112227 | -4.961531219 |
| 1435870_at   | -0.076013327 | 6.602723541 | -1.228440132 | 0.249136748 | 0.249136748 | -4.961599919 |
| 1460460_a_at | -0.091512184 | 8.634724381 | -1.22830377  | 0.249185604 | 0.249185604 | -4.961736769 |
| 1459621_at   | -0.082233532 | 6.215323162 | -1.228206916 | 0.24922031  | 0.24922031  | -4.961833964 |
| 1418389_at   | -0.085246922 | 7.260935502 | -1.228084193 | 0.249264291 | 0.249264291 | -4.961957112 |
| 1425972_a_at | 0.085251724  | 8.960698281 | 1.228063084  | 0.249271857 | 0.249271857 | -4.961978293 |
| 1416543_at   | 0.097436139  | 9.067615338 | 1.227969358  | 0.249305451 | 0.249305451 | -4.962072335 |
| 1438606_a_at | 0.078669785  | 9.957914682 | 1.2279363    | 0.249317301 | 0.249317301 | -4.962105505 |
| 1426716_at   | 0.127513731  | 7.358226959 | 1.227918419  | 0.249323711 | 0.249323711 | -4.962123445 |
| 1426165_a_at | 0.088354441  | 8.089602792 | 1.227877864  | 0.249338249 | 0.249338249 | -4.962164134 |
| 1432970_at   | 0.101746943  | 4.298835688 | 1.227876678  | 0.249338674 | 0.249338674 | -4.962165325 |
| 1417133_at   | -0.115162113 | 10.27271616 | -1.22775122  | 0.249383653 | 0.249383653 | -4.962291193 |
| 1448287_at   | -0.084781028 | 10.48683277 | -1.227747733 | 0.249384903 | 0.249384903 | -4.962294691 |
| 1453201_at   | 0.08190533   | 5.520602751 | 1.227697895  | 0.249402773 | 0.249402773 | -4.96234469  |
| 1416799_at   | 0.109920667  | 9.541669311 | 1.227613533  | 0.249433023 | 0.249433023 | -4.96242932  |
| 1442941_at   | -0.103218294 | 5.494660633 | -1.227548884 | 0.249456207 | 0.249456207 | -4.962494172 |
| 1431655_a_at | 0.078762641  | 6.913003062 | 1.227540531  | 0.249459203 | 0.249459203 | -4.962502551 |
| 1442344_at   | -0.096718476 | 3.28626359  | -1.22730302  | 0.249544394 | 0.249544394 | -4.962740787 |
| 1417524_at   | 0.104338395  | 6.556809395 | 1.227300783  | 0.249545196 | 0.249545196 | -4.962743031 |
| 1441608_at   | 0.138179681  | 7.200484528 | 1.227294266  | 0.249547534 | 0.249547534 | -4.962749567 |
| 1432022_at   | -0.109991806 | 6.844462523 | -1.227117069 | 0.249611107 | 0.249611107 | -4.962927284 |
| 1429849_at   | 0.078068477  | 6.858733529 | 1.227075399  | 0.249626059 | 0.249626059 | -4.962969073 |
| 1455783_at   | -0.123774652 | 4.406651464 | -1.227055154 | 0.249633323 | 0.249633323 | -4.962989376 |
| 1432146_at   | -0.086748315 | 3.861818435 | -1.227015642 | 0.249647502 | 0.249647502 | -4.963029    |
| 1417617_at   | 0.295692311  | 3.760409466 | 1.226905218  | 0.24968713  | 0.24968713  | -4.963139733 |
| 1460344_at   | -0.103797095 | 7.251959416 | -1.226867326 | 0.24970073  | 0.24970073  | -4.963177729 |

|                |              |             |              |             |             |              |
|----------------|--------------|-------------|--------------|-------------|-------------|--------------|
| 1416377_at     | 0.100123832  | 7.658352699 | 1.226807694  | 0.249722133 | 0.249722133 | -4.963237523 |
| AFFX-BioC-5_at | 0.105445503  | 8.899486868 | 1.226715614  | 0.249755186 | 0.249755186 | -4.96332985  |
| 1445619_at     | -0.094885106 | 3.595879254 | -1.226652109 | 0.249777984 | 0.249777984 | -4.963393523 |
| 1430113_at     | -0.101384561 | 4.763291358 | -1.226617839 | 0.249790287 | 0.249790287 | -4.963427883 |
| 1455498_at     | -0.411194344 | 3.934148242 | -1.226483628 | 0.249838475 | 0.249838475 | -4.963562437 |
| 1433372_at     | -0.119796341 | 3.894797731 | -1.226310091 | 0.249900794 | 0.249900794 | -4.963736405 |
| 1421650_at     | -0.082759975 | 5.341950906 | -1.226291277 | 0.249907551 | 0.249907551 | -4.963755264 |
| 1429410_at     | 0.126910581  | 7.903993089 | 1.226205783  | 0.249938258 | 0.249938258 | -4.963840963 |
| 1458836_at     | 0.089653123  | 3.545046589 | 1.226165957  | 0.249952564 | 0.249952564 | -4.963880883 |
| 1442572_at     | -0.083932272 | 3.822794087 | -1.226164946 | 0.249952927 | 0.249952927 | -4.963881896 |
| 1419166_at     | -0.078803196 | 6.069843275 | -1.226136669 | 0.249963084 | 0.249963084 | -4.96391024  |
| 1417256_at     | -0.321762214 | 7.047126881 | -1.226076828 | 0.249984581 | 0.249984581 | -4.963970219 |
| 1434012_at     | -0.129190908 | 7.956350603 | -1.225903471 | 0.250046865 | 0.250046865 | -4.964143966 |
| 1424250_a_at   | 0.090209068  | 5.723184314 | 1.225736045  | 0.25010703  | 0.25010703  | -4.964311753 |
| 1416835_s_at   | 0.119165907  | 9.833783391 | 1.225721774  | 0.250112159 | 0.250112159 | -4.964326054 |
| 1420169_at     | -0.119898039 | 3.395332043 | -1.225684365 | 0.250125604 | 0.250125604 | -4.964363542 |
| 1443950_at     | 0.092617131  | 7.413306884 | 1.225535318  | 0.250179178 | 0.250179178 | -4.964512892 |
| 1457419_s_at   | -0.095252152 | 3.951009536 | -1.225531049 | 0.250180712 | 0.250180712 | -4.96451717  |
| 1437267_x_at   | 0.13041319   | 7.010934609 | 1.225471594  | 0.250202085 | 0.250202085 | -4.964576742 |
| 1426477_at     | 0.09361885   | 9.517369191 | 1.225375354  | 0.250236686 | 0.250236686 | -4.964673168 |
| 1415882_at     | -0.103095838 | 10.17793559 | -1.225333361 | 0.250251784 | 0.250251784 | -4.964715241 |
| 1434426_at     | 0.082938573  | 7.381927372 | 1.225330267  | 0.250252897 | 0.250252897 | -4.96471834  |
| 1429324_at     | 0.085611209  | 5.382423538 | 1.225219947  | 0.250292566 | 0.250292566 | -4.964828865 |
| 1447516_at     | 0.120221578  | 4.215867255 | 1.225202842  | 0.250298717 | 0.250298717 | -4.964846001 |
| 1456347_at     | 0.134795618  | 6.384315121 | 1.225172541  | 0.250309614 | 0.250309614 | -4.964876356 |
| 1448356_at     | 0.081391018  | 10.56609764 | 1.225133224  | 0.250323753 | 0.250323753 | -4.964915743 |
| 1450817_at     | 0.139640199  | 5.450273759 | 1.225121134  | 0.250328101 | 0.250328101 | -4.964927854 |
| 1455438_at     | -0.084155963 | 6.539153286 | -1.225000008 | 0.250371667 | 0.250371667 | -4.96504919  |
| 1439237_a_at   | -0.075018765 | 5.638171264 | -1.224979143 | 0.250379172 | 0.250379172 | -4.965070091 |
| 1418413_at     | -0.200861023 | 5.858401362 | -1.224870179 | 0.25041837  | 0.25041837  | -4.965179235 |
| 1432486_a_at   | -0.09220092  | 4.277013502 | -1.224836144 | 0.250430614 | 0.250430614 | -4.965213325 |
| 1445755_at     | 0.092492736  | 3.805877705 | 1.224760324  | 0.250457893 | 0.250457893 | -4.965289264 |
| 1451889_at     | -0.093326543 | 5.020976595 | -1.224708862 | 0.25047641  | 0.25047641  | -4.965340807 |
| 1417092_at     | -0.16887797  | 10.06733363 | -1.22462053  | 0.250508195 | 0.250508195 | -4.965429272 |
| 1423336_at     | 0.106022289  | 7.86709026  | 1.224494344  | 0.250553607 | 0.250553607 | -4.965555641 |
| 1443284_at     | 0.126890423  | 4.888163132 | 1.224470284  | 0.250562267 | 0.250562267 | -4.965579734 |
| 1440557_at     | 0.287303023  | 3.692106036 | 1.22435356   | 0.250604281 | 0.250604281 | -4.965696618 |
| 1448355_at     | -0.124247671 | 4.596013154 | -1.224271684 | 0.250633755 | 0.250633755 | -4.965778601 |
| 1441689_at     | -0.113734544 | 5.558107097 | -1.224264781 | 0.25063624  | 0.25063624  | -4.965785513 |
| 1433589_at     | 0.087580723  | 8.048386542 | 1.224200881  | 0.250659245 | 0.250659245 | -4.965849493 |
| 1419191_at     | -0.12959985  | 6.068339061 | -1.224187929 | 0.250663909 | 0.250663909 | -4.965862461 |
| 1452392_a_at   | -0.122107388 | 5.379164033 | -1.22386173  | 0.250781376 | 0.250781376 | -4.966189035 |
| 1453519_at     | -0.093174238 | 5.569429708 | -1.223732631 | 0.250827878 | 0.250827878 | -4.966318267 |
| 1418500_at     | 0.116421314  | 6.082487081 | 1.223598939  | 0.250876041 | 0.250876041 | -4.966452085 |
| 1443050_at     | 0.0874472    | 3.981051963 | 1.223558968  | 0.250890443 | 0.250890443 | -4.966492092 |
| 1446160_x_at   | 0.099423259  | 4.908427767 | 1.223521668  | 0.250903882 | 0.250903882 | -4.966529424 |
| 1432662_at     | -0.133802563 | 3.852615902 | -1.223448857 | 0.250930119 | 0.250930119 | -4.966602297 |
| 1422192_at     | -0.121194705 | 4.314849217 | -1.223448057 | 0.250930407 | 0.250930407 | -4.966603098 |
| 1434170_at     | -0.186816705 | 8.319288841 | -1.223353938 | 0.250964325 | 0.250964325 | -4.966697292 |
| 1442442_at     | 0.094238209  | 5.75860689  | 1.223316362  | 0.250977867 | 0.250977867 | -4.966734897 |
| 1437221_at     | 0.10872985   | 3.569697662 | 1.22326925   | 0.250994847 | 0.250994847 | -4.966782044 |
| 1432238_at     | -0.096877563 | 3.974771173 | -1.223268713 | 0.25099504  | 0.25099504  | -4.966782582 |
| 1420392_at     | -0.106317584 | 4.416392517 | -1.223265905 | 0.250996053 | 0.250996053 | -4.966785392 |

|              |              |             |              |             |             |              |
|--------------|--------------|-------------|--------------|-------------|-------------|--------------|
| 1442250_at   | -0.135039672 | 6.202649314 | -1.223044334 | 0.251075923 | 0.251075923 | -4.967007109 |
| 1431542_at   | -0.084187347 | 6.455844127 | -1.223020655 | 0.25108446  | 0.25108446  | -4.967030801 |
| 1460724_at   | -0.12096624  | 7.528539273 | -1.222932337 | 0.251116303 | 0.251116303 | -4.967119169 |
| 1422273_at   | -0.109219986 | 3.532953712 | -1.222900908 | 0.251127635 | 0.251127635 | -4.967150615 |
| 1455352_at   | 0.084786915  | 7.953083667 | 1.22288421   | 0.251133656 | 0.251133656 | -4.967167321 |
| 1420779_at   | -0.144404481 | 5.410389007 | -1.222714726 | 0.251194776 | 0.251194776 | -4.967336884 |
| 1449453_at   | -0.123055985 | 3.852065621 | -1.222651505 | 0.251217578 | 0.251217578 | -4.96740013  |
| 1433940_at   | 0.078306884  | 9.119168673 | 1.222646385  | 0.251219425 | 0.251219425 | -4.967405252 |
| 1420543_at   | 0.111542073  | 6.072231945 | 1.222635167  | 0.251223471 | 0.251223471 | -4.967416473 |
| 1454881_s_at | -0.136234231 | 3.637770019 | -1.222610999 | 0.251232189 | 0.251232189 | -4.967440651 |
| 1457477_at   | 0.17481034   | 7.692416597 | 1.222610764  | 0.251232273 | 0.251232273 | -4.967440885 |
| 1446221_at   | 0.141322158  | 3.802641602 | 1.222474355  | 0.25128148  | 0.25128148  | -4.967577338 |
| 1417135_at   | 0.226920403  | 9.792618119 | 1.222472165  | 0.25128227  | 0.25128227  | -4.967579528 |
| 1457568_at   | 0.099227589  | 7.441068234 | 1.2223949    | 0.251310146 | 0.251310146 | -4.967656813 |
| 1420920_a_at | -0.08628713  | 11.08552979 | -1.222387505 | 0.251312814 | 0.251312814 | -4.96766421  |
| 1454783_at   | 0.098026176  | 6.667418328 | 1.222222716  | 0.251372275 | 0.251372275 | -4.967829029 |
| 1433738_at   | 0.075768787  | 8.709286003 | 1.222214968  | 0.251375071 | 0.251375071 | -4.967836778 |
| 1423243_at   | -0.099248958 | 4.604521259 | -1.222212568 | 0.251375937 | 0.251375937 | -4.967839178 |
| 1434636_at   | 0.096015597  | 4.149083015 | 1.22214093   | 0.25140179  | 0.25140179  | -4.967910825 |
| 1458520_at   | -0.114075263 | 5.097456536 | -1.222024618 | 0.25144377  | 0.25144377  | -4.968027144 |
| 1441716_at   | 0.145750385  | 6.66922114  | 1.221986202  | 0.251457637 | 0.251457637 | -4.96806556  |
| 1432296_a_at | -0.099800158 | 5.168879864 | -1.221809847 | 0.251521301 | 0.251521301 | -4.968241907 |
| 1443631_at   | -0.074383527 | 3.559704254 | -1.221785291 | 0.251530167 | 0.251530167 | -4.968266461 |
| 1434043_a_at | -0.091780652 | 7.001562711 | -1.221671556 | 0.251571234 | 0.251571234 | -4.96838018  |
| 1428455_at   | 0.093611221  | 8.265848873 | 1.221613833  | 0.251592078 | 0.251592078 | -4.968437892 |
| 1421528_a_at | 0.084669331  | 8.743592644 | 1.221558824  | 0.251611944 | 0.251611944 | -4.968492889 |
| 1429054_at   | 0.081899022  | 8.80534567  | 1.221527866  | 0.251623124 | 0.251623124 | -4.968523838 |
| 1443216_at   | 0.166242474  | 5.277093177 | 1.221518519  | 0.2516265   | 0.2516265   | -4.968533184 |
| 1427749_at   | -0.096827904 | 4.23212898  | -1.221299448 | 0.251705631 | 0.251705631 | -4.968752184 |
| 1444475_at   | -0.114811958 | 5.987466097 | -1.221264845 | 0.251718131 | 0.251718131 | -4.968786774 |
| 1446148_x_at | -0.15806055  | 9.234961072 | -1.221248287 | 0.251724114 | 0.251724114 | -4.968803325 |
| 1440510_at   | -0.093008766 | 4.471656604 | -1.221138903 | 0.251763634 | 0.251763634 | -4.968912661 |
| 1454555_at   | 0.110640359  | 4.439204824 | 1.220935759  | 0.251837043 | 0.251837043 | -4.969115697 |
| 1419664_at   | 0.134915624  | 6.342957992 | 1.220903604  | 0.251848664 | 0.251848664 | -4.969147833 |
| 1426588_at   | -0.117884824 | 4.392814817 | -1.220789969 | 0.251889737 | 0.251889737 | -4.969261396 |
| 1441327_a_at | -0.096755186 | 6.461293998 | -1.220578774 | 0.251966087 | 0.251966087 | -4.969472438 |
| 1451435_at   | 0.080678157  | 8.647509435 | 1.220488504  | 0.251998727 | 0.251998727 | -4.969562634 |
| 1459840_s_at | 0.138885425  | 7.303306349 | 1.220426556  | 0.252021128 | 0.252021128 | -4.969624529 |
| 1432822_at   | -0.13433635  | 4.74319249  | -1.220329505 | 0.252056226 | 0.252056226 | -4.969721492 |
| 1425769_x_at | 0.101166323  | 7.669833865 | 1.220299676  | 0.252067014 | 0.252067014 | -4.969751293 |
| 1424116_x_at | -0.086677408 | 9.278439817 | -1.220209952 | 0.252099467 | 0.252099467 | -4.969840931 |
| 1433454_at   | 0.094721898  | 7.322279483 | 1.220118383  | 0.252132591 | 0.252132591 | -4.969932407 |
| 1434507_at   | -0.119645485 | 8.758814844 | -1.219982395 | 0.252181788 | 0.252181788 | -4.970068247 |
| 1455410_at   | -0.150552271 | 4.266161675 | -1.219975252 | 0.252184373 | 0.252184373 | -4.970075381 |
| 1416905_at   | -0.146426494 | 4.456271865 | -1.219941404 | 0.25219662  | 0.25219662  | -4.970109191 |
| 1435954_at   | -0.09475896  | 5.946350106 | -1.219835571 | 0.252234915 | 0.252234915 | -4.970214899 |
| 1447469_at   | 0.127714685  | 6.290378253 | 1.219831354  | 0.252236441 | 0.252236441 | -4.970219112 |
| 1434929_at   | 0.109035343  | 4.377706579 | 1.219784061  | 0.252253556 | 0.252253556 | -4.970266347 |
| 1458401_at   | 0.179085625  | 5.166694421 | 1.219714625  | 0.252278685 | 0.252278685 | -4.970335696 |
| 1447464_at   | -0.150256534 | 3.988321651 | -1.219698701 | 0.252284449 | 0.252284449 | -4.9703516   |
| 1416323_at   | 0.095286129  | 7.955939482 | 1.219646167  | 0.252303463 | 0.252303463 | -4.970404066 |
| 1431377_at   | 0.093254417  | 7.167439013 | 1.219629427  | 0.252309522 | 0.252309522 | -4.970420784 |
| 1436803_a_at | 0.089185966  | 11.18040498 | 1.219587706  | 0.252324623 | 0.252324623 | -4.970462448 |

|              |              |             |              |             |             |              |
|--------------|--------------|-------------|--------------|-------------|-------------|--------------|
| 1453991_at   | -0.077973108 | 4.132633634 | -1.219512702 | 0.252351775 | 0.252351775 | -4.970537351 |
| 1425598_a_at | -0.104568638 | 6.420545499 | -1.219372864 | 0.252402401 | 0.252402401 | -4.970676989 |
| 1456192_x_at | -0.090683351 | 4.254630492 | -1.219269028 | 0.252439999 | 0.252439999 | -4.97078067  |
| 1440846_at   | -0.099036332 | 7.324162564 | -1.219250771 | 0.25244661  | 0.25244661  | -4.970798899 |
| 1421088_at   | -0.087260894 | 10.40069361 | -1.218882698 | 0.252579925 | 0.252579925 | -4.971166369 |
| 1428509_at   | -0.076618672 | 7.195004855 | -1.218836058 | 0.252596822 | 0.252596822 | -4.971212927 |
| 1446797_at   | 0.17385513   | 6.529095075 | 1.218828073  | 0.252599715 | 0.252599715 | -4.971220897 |
| 1446477_at   | 0.122470106  | 3.879166222 | 1.218805659  | 0.252607835 | 0.252607835 | -4.971243271 |
| 1443437_at   | 0.174679551  | 4.452500231 | 1.21879542   | 0.252611545 | 0.252611545 | -4.971253492 |
| 1428645_at   | 0.089354814  | 10.87925906 | 1.218704282  | 0.252644567 | 0.252644567 | -4.971344464 |
| 1451552_at   | -0.084527851 | 6.247256113 | -1.218350597 | 0.252772751 | 0.252772751 | -4.971697462 |
| 1441579_at   | 0.16121882   | 3.716284389 | 1.218326423  | 0.252781514 | 0.252781514 | -4.971721587 |
| 1418101_a_at | 0.091561487  | 10.53889629 | 1.218317586  | 0.252784717 | 0.252784717 | -4.971730406 |
| 1455142_at   | 0.082185895  | 8.672732551 | 1.218311589  | 0.252786892 | 0.252786892 | -4.971736391 |
| 1415769_at   | -0.116959054 | 9.073448862 | -1.218231408 | 0.25281596  | 0.25281596  | -4.971816404 |
| 1424539_at   | -0.087970487 | 8.759914152 | -1.218155651 | 0.252843426 | 0.252843426 | -4.971891999 |
| 1421928_at   | 0.096662227  | 8.59076484  | 1.218105827  | 0.252861492 | 0.252861492 | -4.971941716 |
| 1426493_a_at | -0.12556251  | 6.34948388  | -1.218105194 | 0.252861722 | 0.252861722 | -4.971942348 |
| 1428532_at   | 0.09562891   | 7.670494669 | 1.218061809  | 0.252877454 | 0.252877454 | -4.971985637 |
| 1458019_at   | 0.132680516  | 3.77382531  | 1.218041209  | 0.252884924 | 0.252884924 | -4.972006192 |
| 1439418_x_at | 0.087840172  | 3.612241632 | 1.218000862  | 0.252899555 | 0.252899555 | -4.972046449 |
| 1419684_at   | -0.101990687 | 4.143396658 | -1.217978757 | 0.252907572 | 0.252907572 | -4.972068505 |
| 1426925_at   | 0.133205591  | 5.748068861 | 1.217909645  | 0.252932636 | 0.252932636 | -4.972137459 |
| 1430154_at   | 0.0945707    | 5.713252228 | 1.217844365  | 0.252956313 | 0.252956313 | -4.972202588 |
| 1452557_a_at | 0.104785371  | 4.641370933 | 1.217797184  | 0.252973427 | 0.252973427 | -4.972249659 |
| 1429352_at   | 0.085912683  | 5.632677886 | 1.21779173   | 0.252975405 | 0.252975405 | -4.972255101 |
| 1437257_at   | 0.096866734  | 6.026682552 | 1.217777243  | 0.25298066  | 0.25298066  | -4.972269553 |
| 1427306_at   | -0.457850982 | 5.524891975 | -1.217744401 | 0.252992573 | 0.252992573 | -4.972302317 |
| 1443002_at   | 0.109860634  | 7.573577523 | 1.217725512  | 0.252999426 | 0.252999426 | -4.972321161 |
| 1421294_at   | -0.092057215 | 6.314207988 | -1.217708319 | 0.253005663 | 0.253005663 | -4.972338313 |
| 1439782_s_at | 0.114902239  | 6.458175448 | 1.217661841  | 0.253022524 | 0.253022524 | -4.972384678 |
| 1443231_at   | 0.104857848  | 8.083942926 | 1.217642911  | 0.253029392 | 0.253029392 | -4.972403562 |
| 1417114_at   | 0.080247112  | 8.781693604 | 1.217628419  | 0.253034649 | 0.253034649 | -4.972418018 |
| 1437424_at   | 0.106988556  | 8.49238706  | 1.217625548  | 0.253035691 | 0.253035691 | -4.972420882 |
| 1427671_a_at | -0.102013241 | 4.786725514 | -1.217500285 | 0.25308114  | 0.25308114  | -4.972545834 |
| 1431857_at   | -0.118939522 | 6.636379444 | -1.21744614  | 0.253100788 | 0.253100788 | -4.972599842 |
| 1443405_at   | 0.088527124  | 4.00877546  | 1.217431201  | 0.253106209 | 0.253106209 | -4.972614743 |
| 1429050_at   | 0.11511232   | 8.573443628 | 1.217411501  | 0.253113358 | 0.253113358 | -4.972634392 |
| 1428019_at   | -0.162891349 | 4.270520606 | -1.21740205  | 0.253116788 | 0.253116788 | -4.972643819 |
| 1419932_s_at | -0.079939747 | 4.049306793 | -1.217359605 | 0.253132191 | 0.253132191 | -4.972686154 |
| 1439022_at   | 0.12118889   | 5.836949222 | 1.217197738  | 0.253190941 | 0.253190941 | -4.972847592 |
| 1435636_at   | -0.116832258 | 8.952958748 | -1.217188198 | 0.253194404 | 0.253194404 | -4.972857106 |
| 1435594_at   | -0.08951143  | 6.375050441 | -1.217152502 | 0.253207361 | 0.253207361 | -4.972892706 |
| 1445859_at   | 0.121427074  | 4.340151035 | 1.217133872  | 0.253214124 | 0.253214124 | -4.972911285 |
| 1439396_x_at | -0.139924363 | 3.791462163 | -1.217108911 | 0.253223186 | 0.253223186 | -4.972936178 |
| 1426013_s_at | 0.202753755  | 5.187146808 | 1.216937698  | 0.253285346 | 0.253285346 | -4.973106913 |
| 1454730_at   | -0.096987489 | 8.51598719  | -1.216899635 | 0.253299167 | 0.253299167 | -4.973144868 |
| 1417100_at   | -0.07844788  | 8.232853516 | -1.216768398 | 0.253346824 | 0.253346824 | -4.973275725 |
| 1446404_at   | -0.095136628 | 3.511987009 | -1.216762931 | 0.25334881  | 0.25334881  | -4.973281176 |
| 1430447_a_at | 0.108781774  | 4.082077123 | 1.216742692  | 0.25335616  | 0.25335616  | -4.973301354 |
| 1433345_s_at | -0.104674938 | 4.357143105 | -1.216721335 | 0.253363916 | 0.253363916 | -4.973322648 |
| 1423036_at   | -0.091231053 | 3.993282696 | -1.216598122 | 0.253408669 | 0.253408669 | -4.973445492 |
| 1434873_a_at | 0.100187338  | 4.932797278 | 1.216548471  | 0.253426704 | 0.253426704 | -4.973494992 |

|              |              |             |              |             |             |              |
|--------------|--------------|-------------|--------------|-------------|-------------|--------------|
| 1434966_at   | 0.095871893  | 8.595958274 | 1.216536695  | 0.253430982 | 0.253430982 | -4.973506732 |
| 1430910_at   | 0.093164428  | 4.025027681 | 1.216514978  | 0.253438871 | 0.253438871 | -4.973528382 |
| 1418114_at   | 0.083259281  | 8.962348027 | 1.216463131  | 0.253457706 | 0.253457706 | -4.973580069 |
| 1444479_at   | 0.130410595  | 7.578076431 | 1.216379524  | 0.253488082 | 0.253488082 | -4.973663414 |
| 1429350_at   | -0.132727567 | 3.543848451 | -1.216343057 | 0.253501332 | 0.253501332 | -4.973699766 |
| 1445821_at   | 0.075308516  | 3.394023552 | 1.21624595   | 0.253536617 | 0.253536617 | -4.973796561 |
| 1450622_at   | -0.113663329 | 7.217648939 | -1.216194109 | 0.253555456 | 0.253555456 | -4.973848235 |
| 1458395_at   | -0.110938141 | 4.737731051 | -1.216189099 | 0.253557277 | 0.253557277 | -4.973853229 |
| 1444102_at   | -0.127444602 | 4.540230143 | -1.216171329 | 0.253563735 | 0.253563735 | -4.97387094  |
| 1443186_at   | 0.079836016  | 3.166772529 | 1.216073201  | 0.253599398 | 0.253599398 | -4.973968744 |
| 1422388_at   | 0.112399496  | 3.757014968 | 1.216067879  | 0.253601333 | 0.253601333 | -4.973974048 |
| 1428107_at   | 0.12601457   | 10.41074429 | 1.216067059  | 0.25360163  | 0.25360163  | -4.973974865 |
| 1427223_a_at | -0.098649905 | 4.409630788 | -1.216055114 | 0.253605972 | 0.253605972 | -4.973986771 |
| 1441196_at   | -0.087087137 | 4.050544126 | -1.215985873 | 0.25363114  | 0.25363114  | -4.97405578  |
| 1435787_at   | -0.110530021 | 7.642094003 | -1.215949573 | 0.253644335 | 0.253644335 | -4.974091956 |
| 1453485_s_at | 0.085142289  | 7.838381906 | 1.215820241  | 0.253691353 | 0.253691353 | -4.974220845 |
| 1431911_at   | -0.119718875 | 3.484631557 | -1.215809167 | 0.253695379 | 0.253695379 | -4.97423188  |
| 1445576_at   | -0.228747831 | 4.367352438 | -1.215789785 | 0.253702426 | 0.253702426 | -4.974251195 |
| 1436842_at   | -0.112715043 | 8.497315104 | -1.215781586 | 0.253705407 | 0.253705407 | -4.974259365 |
| 1432181_s_at | -0.089107929 | 6.609469866 | -1.215735946 | 0.253722001 | 0.253722001 | -4.974304845 |
| 1441450_s_at | -0.151237133 | 7.704160824 | -1.215453335 | 0.253824776 | 0.253824776 | -4.974586439 |
| 1438041_at   | 0.093945681  | 8.746083084 | 1.215380562  | 0.253851246 | 0.253851246 | -4.974658943 |
| 1439590_at   | -0.156812076 | 4.704148196 | -1.215377563 | 0.253852337 | 0.253852337 | -4.97466193  |
| 1431466_at   | -0.153236555 | 4.339486485 | -1.215309583 | 0.253877066 | 0.253877066 | -4.974729657 |
| 1431226_a_at | -0.099038962 | 8.748343079 | -1.215203949 | 0.253915496 | 0.253915496 | -4.97483489  |
| 1439586_at   | -0.158124987 | 5.586459432 | -1.215160513 | 0.2539313   | 0.2539313   | -4.97487816  |
| 1453451_at   | 0.137805567  | 7.147085619 | 1.214847802  | 0.254045099 | 0.254045099 | -4.975189641 |
| 1447553_x_at | 0.098427904  | 3.081005732 | 1.214316029  | 0.254238713 | 0.254238713 | -4.975719196 |
| 1450014_at   | -0.128939243 | 5.3750079   | -1.214236427 | 0.254267705 | 0.254267705 | -4.975798452 |
| 1435642_at   | -0.171696051 | 6.605725821 | -1.214150953 | 0.25429884  | 0.25429884  | -4.975883551 |
| 1455358_at   | 0.204025294  | 6.096986262 | 1.214150454  | 0.254299022 | 0.254299022 | -4.975884048 |
| 1420583_a_at | 0.163345202  | 6.977608592 | 1.213991803  | 0.254356819 | 0.254356819 | -4.976041991 |
| 1425022_at   | 0.074138233  | 8.730980277 | 1.213886209  | 0.254395294 | 0.254395294 | -4.976147106 |
| 1428138_s_at | -0.094145793 | 9.833849893 | -1.213857666 | 0.254405694 | 0.254405694 | -4.976175519 |
| 1453542_at   | 0.23000713   | 5.700499445 | 1.213856377  | 0.254406164 | 0.254406164 | -4.976176801 |
| 1454609_x_at | 0.104812085  | 9.305428224 | 1.213778944  | 0.254434382 | 0.254434382 | -4.976253878 |
| 1447813_x_at | 0.077424423  | 3.641260139 | 1.213736936  | 0.254449691 | 0.254449691 | -4.976295691 |
| 1453986_at   | 0.0963959    | 4.240955567 | 1.213705545  | 0.254461132 | 0.254461132 | -4.976326937 |
| 1447314_at   | 0.091194079  | 7.016148823 | 1.213640795  | 0.254484732 | 0.254484732 | -4.976391383 |
| 1447620_at   | -0.10181012  | 3.335744085 | -1.213421157 | 0.254564797 | 0.254564797 | -4.976609974 |
| 1445200_at   | -0.11854522  | 5.647321825 | -1.213128323 | 0.254671577 | 0.254671577 | -4.97690137  |
| 1418016_at   | 0.080829908  | 10.37075069 | 1.213060018  | 0.254696489 | 0.254696489 | -4.976969332 |
| 1428050_a_at | -0.115063096 | 8.735146094 | -1.213025082 | 0.254709232 | 0.254709232 | -4.977004092 |
| 1425302_at   | -0.178126903 | 5.86388374  | -1.212927792 | 0.254744721 | 0.254744721 | -4.977100888 |
| 1443687_x_at | 0.084231586  | 4.526865545 | 1.212926348  | 0.254745248 | 0.254745248 | -4.977102325 |
| 1421765_at   | -0.139747123 | 4.248441711 | -1.212849029 | 0.254773454 | 0.254773454 | -4.977179247 |
| 1446661_at   | -0.14865705  | 4.839075884 | -1.212705638 | 0.254825771 | 0.254825771 | -4.977321894 |
| 1438013_x_at | -0.080517549 | 6.247365635 | -1.212657998 | 0.254843154 | 0.254843154 | -4.977369284 |
| 1435918_at   | 0.103615757  | 3.870986481 | 1.212605631  | 0.254862264 | 0.254862264 | -4.977421374 |
| 1447879_x_at | 0.091109525  | 3.22198595  | 1.212555526  | 0.254880549 | 0.254880549 | -4.977471214 |
| 1447774_x_at | 0.183544083  | 6.177234615 | 1.212432536  | 0.254925437 | 0.254925437 | -4.977593545 |
| 1438081_at   | -0.132949914 | 7.325503725 | -1.212418962 | 0.254930392 | 0.254930392 | -4.977607046 |
| 1446708_at   | -0.136828499 | 6.839405309 | -1.212390162 | 0.254940904 | 0.254940904 | -4.97763569  |

|              |              |             |              |             |             |              |
|--------------|--------------|-------------|--------------|-------------|-------------|--------------|
| 1448264_a_at | 0.086869979  | 11.78075023 | 1.212350671  | 0.254955319 | 0.254955319 | -4.977674967 |
| 1445899_at   | -0.137059415 | 5.656092378 | -1.212329012 | 0.254963226 | 0.254963226 | -4.977696508 |
| 1431119_at   | -0.262230066 | 6.455485182 | -1.21231787  | 0.254967293 | 0.254967293 | -4.977707589 |
| 1423590_at   | 0.101857624  | 4.78607384  | 1.212303404  | 0.254972574 | 0.254972574 | -4.977721976 |
| 1453359_at   | -0.107595991 | 6.287899563 | -1.212225825 | 0.255000896 | 0.255000896 | -4.97779913  |
| 1435105_at   | 0.109588229  | 5.793263001 | 1.212204623  | 0.255008636 | 0.255008636 | -4.977820215 |
| 1438814_at   | -0.107239974 | 7.024674638 | -1.212182171 | 0.255016834 | 0.255016834 | -4.977842543 |
| 1449993_at   | -0.088936032 | 4.021136713 | -1.21217666  | 0.255018846 | 0.255018846 | -4.977848024 |
| 1423975_s_at | 0.097837226  | 9.878300279 | 1.212031819  | 0.255071733 | 0.255071733 | -4.977992057 |
| 1446794_at   | 0.08591739   | 3.781214737 | 1.211983432  | 0.255089403 | 0.255089403 | -4.978040172 |
| 1444518_at   | 0.124652539  | 5.321725352 | 1.211869083  | 0.255131165 | 0.255131165 | -4.978153872 |
| 1449979_a_at | 0.14139728   | 3.925246628 | 1.211852947  | 0.255137058 | 0.255137058 | -4.978169916 |
| 1439529_at   | -0.102614646 | 7.252018585 | -1.211792938 | 0.255158977 | 0.255158977 | -4.97822958  |
| 1447504_at   | 0.155335146  | 4.207087113 | 1.211710998  | 0.255188909 | 0.255188909 | -4.978311047 |
| 1445672_at   | -0.100631225 | 3.919372162 | -1.211681831 | 0.255199564 | 0.255199564 | -4.978340045 |
| 1451887_at   | -0.16106072  | 6.216044577 | -1.211461022 | 0.25528024  | 0.25528024  | -4.978559557 |
| 1445455_at   | -0.085914894 | 3.407049052 | -1.211283501 | 0.255345115 | 0.255345115 | -4.978736014 |
| 1453609_s_at | 0.088658194  | 6.815521555 | 1.21127721   | 0.255347414 | 0.255347414 | -4.978742268 |
| 1416877_a_at | 0.083727855  | 10.48463895 | 1.210963694  | 0.255462022 | 0.255462022 | -4.979053861 |
| 1449849_a_at | 0.15053837   | 7.789303016 | 1.210933338  | 0.25547312  | 0.25547312  | -4.979084027 |
| 1426853_at   | 0.080907891  | 11.72541037 | 1.210879446  | 0.255492826 | 0.255492826 | -4.979137582 |
| 1437194_x_at | -0.142284316 | 9.550164054 | -1.210871748 | 0.255495641 | 0.255495641 | -4.979145232 |
| 1434532_at   | 0.114724308  | 7.875631307 | 1.21071372   | 0.255553431 | 0.255553431 | -4.979302262 |
| 1419770_at   | -0.139185325 | 3.799936332 | -1.210706766 | 0.255555974 | 0.255555974 | -4.979309171 |
| 1432779_at   | -0.096988973 | 5.639719839 | -1.210523319 | 0.255623074 | 0.255623074 | -4.979491441 |
| 1451883_at   | -0.171535147 | 4.887220471 | -1.21051443  | 0.255626325 | 0.255626325 | -4.979500272 |
| 1436514_at   | -0.085579073 | 8.285638051 | -1.210509894 | 0.255627984 | 0.255627984 | -4.979504778 |
| 1424968_at   | -0.103654264 | 4.018700522 | -1.210486106 | 0.255636687 | 0.255636687 | -4.979528413 |
| 1428427_at   | 0.118784512  | 5.574065803 | 1.210457941  | 0.25564699  | 0.25564699  | -4.979556395 |
| 1442347_at   | 0.099893493  | 5.262265035 | 1.210346869  | 0.255687627 | 0.255687627 | -4.979666739 |
| 1452593_a_at | 0.118877708  | 4.557057214 | 1.210241653  | 0.255726126 | 0.255726126 | -4.979771261 |
| 1432165_at   | -0.094903764 | 4.036378511 | -1.210228696 | 0.255730868 | 0.255730868 | -4.979784132 |
| 1447790_at   | 0.115190435  | 5.63859613  | 1.210153402  | 0.255758421 | 0.255758421 | -4.979858924 |
| 1441684_at   | 0.361336072  | 7.505279166 | 1.210006365  | 0.255812237 | 0.255812237 | -4.980004973 |
| 1445732_at   | 0.081812569  | 3.496220745 | 1.209963884  | 0.255827786 | 0.255827786 | -4.980047166 |
| 1436145_at   | 0.120032398  | 7.095508256 | 1.209919614  | 0.255843992 | 0.255843992 | -4.980091135 |
| 1444772_at   | 0.098340146  | 5.789146631 | 1.209873012  | 0.255861051 | 0.255861051 | -4.980137418 |
| 1434023_at   | -0.122109415 | 8.314141645 | -1.209803013 | 0.255886678 | 0.255886678 | -4.980206937 |
| 1448251_at   | 0.080093801  | 9.959807794 | 1.20979439   | 0.255889835 | 0.255889835 | -4.980215501 |
| 1454479_at   | -0.07984709  | 4.708111708 | -1.209792691 | 0.255890457 | 0.255890457 | -4.980217189 |
| 1440953_at   | -0.079024497 | 3.882259187 | -1.209696132 | 0.255925811 | 0.255925811 | -4.98031308  |
| 1446312_at   | 0.114221988  | 5.28107778  | 1.209636281  | 0.255947727 | 0.255947727 | -4.980372515 |
| 1425367_at   | -0.143758188 | 5.434335853 | -1.209599278 | 0.255961277 | 0.255961277 | -4.980409259 |
| 1433031_at   | -0.085659748 | 4.001314428 | -1.209591153 | 0.255964252 | 0.255964252 | -4.980417327 |
| 1450500_at   | -0.088981406 | 5.054738581 | -1.209572853 | 0.255970954 | 0.255970954 | -4.980435499 |
| 1456265_at   | 0.103136665  | 6.46296341  | 1.209519535  | 0.25599048  | 0.25599048  | -4.980488442 |
| 1445474_at   | 0.081472497  | 5.593365529 | 1.209490292  | 0.25600119  | 0.25600119  | -4.980517479 |
| 1443325_at   | 0.098529585  | 7.496064782 | 1.209462521  | 0.256011361 | 0.256011361 | -4.980545054 |
| 1439066_at   | -0.100116131 | 9.257978577 | -1.209440697 | 0.256019355 | 0.256019355 | -4.980566723 |
| 1455843_at   | 0.129629313  | 5.315265272 | 1.209429183  | 0.256023572 | 0.256023572 | -4.980578155 |
| 1441551_at   | -0.118334341 | 4.597322682 | -1.209394258 | 0.256036364 | 0.256036364 | -4.980612832 |
| 1427521_a_at | -0.106636148 | 4.702785751 | -1.209364263 | 0.256047351 | 0.256047351 | -4.980642613 |
| 1444932_at   | -0.117389568 | 4.728378147 | -1.209348232 | 0.256053223 | 0.256053223 | -4.98065853  |



|              |              |             |              |             |             |              |
|--------------|--------------|-------------|--------------|-------------|-------------|--------------|
| 1431528_at   | -0.140842779 | 7.343198254 | -1.209307591 | 0.256068111 | 0.256068111 | -4.980698881 |
| 1428362_at   | 0.088982908  | 10.71235544 | 1.209307421  | 0.256068173 | 0.256068173 | -4.98069905  |
| 1458077_at   | 0.139784066  | 7.089090302 | 1.209280922  | 0.25607788  | 0.25607788  | -4.980725358 |
| 1454096_a_at | -0.096379557 | 4.822691415 | -1.209215062 | 0.256102008 | 0.256102008 | -4.980790744 |
| 1429815_at   | -0.27919402  | 4.512228161 | -1.209077057 | 0.256152572 | 0.256152572 | -4.980927748 |
| 1433827_at   | 0.110455147  | 8.045652465 | 1.209053776  | 0.256161103 | 0.256161103 | -4.98095086  |
| 1435471_at   | 0.125801482  | 4.251543448 | 1.209041625  | 0.256165556 | 0.256165556 | -4.980962922 |
| 1434297_at   | -0.092194179 | 3.645748197 | -1.209035603 | 0.256167762 | 0.256167762 | -4.9809689   |
| 1423298_at   | 0.087560831  | 9.42017014  | 1.209008336  | 0.256177754 | 0.256177754 | -4.980995967 |
| 1437395_at   | 0.099579617  | 9.356896285 | 1.208985627  | 0.256186076 | 0.256186076 | -4.981018509 |
| 1444595_at   | 0.097461583  | 4.056758534 | 1.208884673  | 0.256223074 | 0.256223074 | -4.981118719 |
| 1437635_at   | -0.090049385 | 8.945071668 | -1.20885177  | 0.256235133 | 0.256235133 | -4.981151378 |
| 1448835_at   | 0.101919771  | 9.251594752 | 1.2088301    | 0.256243076 | 0.256243076 | -4.981172887 |
| 1418687_at   | 0.0983101    | 4.437186562 | 1.208824989  | 0.256244949 | 0.256244949 | -4.98117796  |
| 1451017_at   | -0.091864737 | 9.158635182 | -1.208750909 | 0.256272103 | 0.256272103 | -4.981251487 |
| 1456197_x_at | 0.087595912  | 3.961818812 | 1.208523027  | 0.256355646 | 0.256355646 | -4.981477651 |
| 1452831_s_at | 0.076374108  | 7.615919988 | 1.20841362   | 0.256395764 | 0.256395764 | -4.981586222 |
| 1427422_at   | -0.076651112 | 3.96195905  | -1.208351224 | 0.256418645 | 0.256418645 | -4.981648137 |
| 1420335_at   | 0.084415571  | 4.641311465 | 1.208289319  | 0.256441349 | 0.256441349 | -4.981709564 |
| 1458923_at   | -0.111285471 | 4.290487355 | -1.208241573 | 0.25645886  | 0.25645886  | -4.981756941 |
| 1417139_at   | 0.093295843  | 7.315948668 | 1.208229084  | 0.256463441 | 0.256463441 | -4.981769332 |
| 1443192_at   | -0.084971092 | 3.621197125 | -1.208191085 | 0.256477379 | 0.256477379 | -4.981807036 |
| 1447993_a_at | -0.084418702 | 8.54283846  | -1.208153261 | 0.256491253 | 0.256491253 | -4.981844564 |
| 1458791_at   | -0.083586284 | 3.347239618 | -1.208131349 | 0.256499291 | 0.256499291 | -4.981866305 |
| 1438409_at   | -0.097994546 | 7.966864732 | -1.208109482 | 0.256507312 | 0.256507312 | -4.981888    |
| 1428514_at   | 0.134401587  | 7.353924989 | 1.208107624  | 0.256507994 | 0.256507994 | -4.981889844 |
| 1457305_at   | 0.08169184   | 7.272332315 | 1.208049692  | 0.256529246 | 0.256529246 | -4.98194732  |
| 1426476_at   | 0.089411609  | 9.436178512 | 1.208006667  | 0.25654503  | 0.25654503  | -4.981990006 |
| 1445827_at   | -0.161934842 | 5.712264592 | -1.20794285  | 0.256568444 | 0.256568444 | -4.982053318 |
| 1432798_at   | -0.101518505 | 3.897108844 | -1.207902796 | 0.25658314  | 0.25658314  | -4.982093052 |
| 1441852_x_at | 0.08695221   | 3.035848955 | 1.207690517  | 0.256661039 | 0.256661039 | -4.982303629 |
| 1454231_a_at | -0.148083313 | 4.115851853 | -1.207666228 | 0.256669954 | 0.256669954 | -4.982327722 |
| 1446913_at   | 0.106656824  | 3.378605025 | 1.207460209  | 0.256745576 | 0.256745576 | -4.98253206  |
| 1442708_at   | 0.089210438  | 3.899210212 | 1.207423698  | 0.25675898  | 0.25675898  | -4.982568271 |
| 1440559_at   | -0.086636888 | 4.657087333 | -1.207410119 | 0.256763965 | 0.256763965 | -4.982581738 |
| 1427651_x_at | -0.088234911 | 3.509878904 | -1.207404325 | 0.256766092 | 0.256766092 | -4.982587484 |
| 1427258_at   | 0.076745581  | 9.264117067 | 1.207390411  | 0.2567712   | 0.2567712   | -4.982601284 |
| 1417346_at   | -0.122238734 | 8.731764773 | -1.207357505 | 0.256783282 | 0.256783282 | -4.982633917 |
| 1451613_at   | 0.103574842  | 3.195505333 | 1.207293515  | 0.256806777 | 0.256806777 | -4.982697377 |
| 1443866_at   | 0.146540356  | 3.929420914 | 1.207284667  | 0.256810025 | 0.256810025 | -4.982706152 |
| 1454530_at   | -0.104352109 | 3.967646331 | -1.207208282 | 0.256838074 | 0.256838074 | -4.9827819   |
| 1420693_at   | -0.277685308 | 6.352771997 | -1.207099442 | 0.256878044 | 0.256878044 | -4.982889827 |
| 1434246_at   | -0.083168205 | 9.376272394 | -1.207070404 | 0.256888709 | 0.256888709 | -4.982918621 |
| 1431869_at   | -0.116851843 | 3.829788062 | -1.207067006 | 0.256889957 | 0.256889957 | -4.98292199  |
| 1451123_at   | 0.111401631  | 7.220115093 | 1.20691224   | 0.256946804 | 0.256946804 | -4.983075443 |
| 1456884_at   | -0.138463031 | 5.644492775 | -1.206890176 | 0.256954909 | 0.256954909 | -4.983097319 |
| 1444668_at   | 0.119026459  | 3.907661881 | 1.206849118  | 0.256969992 | 0.256969992 | -4.983138026 |
| 1423522_at   | 0.156235601  | 8.245178428 | 1.206817155  | 0.256981734 | 0.256981734 | -4.983169714 |
| 1460631_at   | 0.080431652  | 11.37213304 | 1.206802549  | 0.2569871   | 0.2569871   | -4.983184195 |
| 1433236_at   | 0.077916686  | 3.520053047 | 1.206786807  | 0.256992884 | 0.256992884 | -4.983199802 |
| 1456186_at   | -0.080103083 | 6.628175272 | -1.206716894 | 0.25701857  | 0.25701857  | -4.983269112 |
| 1442387_at   | 0.088809328  | 5.130384938 | 1.206705969  | 0.257022585 | 0.257022585 | -4.983279944 |
| 1433998_at   | 0.076984025  | 8.438513243 | 1.206705575  | 0.257022729 | 0.257022729 | -4.983280334 |

|              |              |             |              |             |             |              |
|--------------|--------------|-------------|--------------|-------------|-------------|--------------|
| 1451020_at   | 0.092077593  | 8.535776565 | 1.206690911  | 0.257028117 | 0.257028117 | -4.983294871 |
| 1442219_at   | 0.126183334  | 3.450117487 | 1.206667674  | 0.257036656 | 0.257036656 | -4.983317907 |
| 1435926_at   | 0.120072955  | 6.449310751 | 1.206660445  | 0.257039312 | 0.257039312 | -4.983325073 |
| 1428506_at   | 0.104462788  | 10.59269114 | 1.206581448  | 0.25706834  | 0.25706834  | -4.983403383 |
| 1436823_x_at | 0.197034459  | 12.77544202 | 1.206444961  | 0.257118501 | 0.257118501 | -4.983538676 |
| 1436039_at   | -0.106468683 | 4.088859513 | -1.206437736 | 0.257121156 | 0.257121156 | -4.983545838 |
| 1420265_x_at | -0.083275819 | 7.666470249 | -1.206424707 | 0.257125945 | 0.257125945 | -4.983558751 |
| 1448199_at   | 0.076926574  | 9.52266813  | 1.206189056  | 0.25721257  | 0.25721257  | -4.983792312 |
| 1435410_at   | -0.095506574 | 4.259218665 | -1.206183029 | 0.257214786 | 0.257214786 | -4.983798285 |
| 1423052_at   | -0.089887015 | 11.99131059 | -1.206164914 | 0.257221446 | 0.257221446 | -4.983816239 |
| 1457003_at   | 0.088024464  | 4.142531415 | 1.206128565  | 0.25723481  | 0.25723481  | -4.983852261 |
| 1425216_at   | -0.0957519   | 4.779513107 | -1.206104317 | 0.257243725 | 0.257243725 | -4.983876292 |
| 1439577_at   | -0.105998405 | 6.179906979 | -1.206101374 | 0.257244808 | 0.257244808 | -4.983879208 |
| 1451433_at   | -0.144488258 | 6.739942196 | -1.205981291 | 0.257288964 | 0.257288964 | -4.983998208 |
| 1420383_a_at | 0.11544958   | 6.093033229 | 1.205953171  | 0.257299304 | 0.257299304 | -4.984026073 |
| 1435117_a_at | -0.131809399 | 7.26585477  | -1.205858262 | 0.257334209 | 0.257334209 | -4.984120119 |
| 1424164_at   | 0.076058462  | 9.392378818 | 1.205818981  | 0.257348657 | 0.257348657 | -4.984159041 |
| 1458790_at   | 0.171126044  | 3.625299299 | 1.205767796  | 0.257367483 | 0.257367483 | -4.984209757 |
| 1419571_at   | -0.127442959 | 4.12275766  | -1.205756476 | 0.257371647 | 0.257371647 | -4.984220973 |
| 1442777_at   | 0.098462778  | 3.259015997 | 1.205661317  | 0.257406651 | 0.257406651 | -4.984315255 |
| 1433517_at   | 0.122754119  | 5.245750709 | 1.205655653  | 0.257408735 | 0.257408735 | -4.984320867 |
| 1441892_x_at | 0.104161246  | 3.750100746 | 1.205507821  | 0.257463123 | 0.257463123 | -4.984467327 |
| 1425861_x_at | 0.126323962  | 5.144087127 | 1.205448566  | 0.257484926 | 0.257484926 | -4.984526027 |
| 1433900_at   | -0.076972991 | 9.129861141 | -1.205377331 | 0.257511139 | 0.257511139 | -4.984596594 |
| 1457712_at   | 0.160474647  | 7.362423143 | 1.205252519  | 0.257557072 | 0.257557072 | -4.984720228 |
| 1437897_at   | 0.126225247  | 3.815736978 | 1.205208758  | 0.257573179 | 0.257573179 | -4.984763574 |
| 1437506_at   | -0.086797211 | 7.179753476 | -1.205203891 | 0.25757497  | 0.25757497  | -4.984768396 |
| 1432495_at   | 0.130701213  | 4.316313279 | 1.205187252  | 0.257581095 | 0.257581095 | -4.984784876 |
| 1420746_at   | -0.103240877 | 3.368100355 | -1.205171615 | 0.25758685  | 0.25758685  | -4.984800364 |
| 1455585_at   | 0.078469727  | 8.676675755 | 1.205155914  | 0.257592629 | 0.257592629 | -4.984815916 |
| 1437788_at   | 0.187725144  | 6.554970208 | 1.204943983  | 0.257670648 | 0.257670648 | -4.985025815 |
| 1449663_at   | -0.106122795 | 4.118343883 | -1.204882263 | 0.257693373 | 0.257693373 | -4.985086939 |
| 1437020_at   | 0.14260682   | 7.23393379  | 1.204877309  | 0.257695197 | 0.257695197 | -4.985091844 |
| 1418952_at   | -0.099302273 | 5.962620388 | -1.204840973 | 0.257708577 | 0.257708577 | -4.985127828 |
| 1443182_at   | 0.135419061  | 5.517032015 | 1.20462744   | 0.257787213 | 0.257787213 | -4.985339275 |
| 1429188_at   | 0.104132706  | 8.53095189  | 1.20458693   | 0.257802134 | 0.257802134 | -4.985379387 |
| 1445757_at   | 0.086952607  | 7.933864637 | 1.204562213  | 0.257811238 | 0.257811238 | -4.98540386  |
| 1459959_at   | -0.079677721 | 3.981816263 | -1.204559178 | 0.257812356 | 0.257812356 | -4.985406865 |
| 1420445_at   | -0.116879703 | 6.05917697  | -1.204495444 | 0.257835833 | 0.257835833 | -4.985469968 |
| 1444748_at   | 0.126500544  | 4.628719892 | 1.204448134  | 0.257853261 | 0.257853261 | -4.985516809 |
| 1450300_at   | -0.090336962 | 4.329297406 | -1.20424334  | 0.257928713 | 0.257928713 | -4.985719558 |
| 1441501_at   | 0.090622602  | 5.917579139 | 1.204215913  | 0.25793882  | 0.25793882  | -4.985746708 |
| 1424844_at   | -0.10109063  | 7.480474837 | -1.204169506 | 0.257955921 | 0.257955921 | -4.985792648 |
| 1460105_at   | 0.10837813   | 3.766242794 | 1.203948901  | 0.258037226 | 0.258037226 | -4.986011014 |
| 1426036_a_at | 0.090841094  | 3.595733082 | 1.203915367  | 0.258049586 | 0.258049586 | -4.986044204 |
| 1426548_a_at | 0.081853668  | 8.685170207 | 1.203867353  | 0.258067286 | 0.258067286 | -4.986091727 |
| 1439607_at   | 0.150163922  | 3.94989263  | 1.203750142  | 0.258110497 | 0.258110497 | -4.986207731 |
| 1450211_at   | 0.154213331  | 3.624076244 | 1.203619231  | 0.258158765 | 0.258158765 | -4.986337284 |
| 1442260_at   | 0.178004159  | 5.562843264 | 1.203612446  | 0.258161267 | 0.258161267 | -4.986343999 |
| 1455336_at   | 0.09308983   | 8.324136456 | 1.203600437  | 0.258165695 | 0.258165695 | -4.986355882 |
| 1417887_at   | -0.125794621 | 6.178032927 | -1.203575235 | 0.258174989 | 0.258174989 | -4.986380822 |
| 1415862_at   | -0.118011841 | 3.876561512 | -1.20356725  | 0.258177933 | 0.258177933 | -4.986388723 |
| 1432540_at   | -0.075933405 | 3.887147789 | -1.203523036 | 0.258194238 | 0.258194238 | -4.986432476 |

|                    |              |             |              |             |             |              |
|--------------------|--------------|-------------|--------------|-------------|-------------|--------------|
| 1417454_at         | 0.086681796  | 10.28638816 | 1.203437425  | 0.258225811 | 0.258225811 | -4.986517189 |
| 1451970_at         | -0.168331274 | 5.724859863 | -1.203225339 | 0.258304042 | 0.258304042 | -4.986727034 |
| 1446564_at         | -0.093253723 | 5.153831255 | -1.203129715 | 0.25833932  | 0.25833932  | -4.986821638 |
| 1437372_at         | 0.214147429  | 7.592058484 | 1.203085853  | 0.258355504 | 0.258355504 | -4.986865031 |
| 1417607_at         | -0.105112091 | 6.848173788 | -1.203045123 | 0.258370532 | 0.258370532 | -4.986905325 |
| AFFX-r2-Bs-phe-5_ç | 0.144368003  | 4.330200697 | 1.203009942  | 0.258383514 | 0.258383514 | -4.986940128 |
| 1418117_at         | 0.089853882  | 6.387107625 | 1.202995121  | 0.258388983 | 0.258388983 | -4.986954789 |
| 1428398_at         | -0.079358297 | 5.43303986  | -1.202908656 | 0.258420891 | 0.258420891 | -4.987040322 |
| 1426436_at         | 0.09019106   | 7.813198242 | 1.202906866  | 0.258421551 | 0.258421551 | -4.987042093 |
| 1438048_at         | -0.077100717 | 6.744965606 | -1.202809806 | 0.258457373 | 0.258457373 | -4.9871381   |
| 1437854_at         | -0.095333672 | 4.834080657 | -1.202706047 | 0.258495671 | 0.258495671 | -4.987240728 |
| 1446770_at         | 0.079823526  | 4.291842456 | 1.202704519  | 0.258496235 | 0.258496235 | -4.987242239 |
| 1417596_at         | -0.177889485 | 8.448414523 | -1.202682872 | 0.258504225 | 0.258504225 | -4.98726365  |
| 1417326_a_at       | -0.117335647 | 9.227321017 | -1.202594427 | 0.258536875 | 0.258536875 | -4.987351125 |
| 1429489_at         | 0.137441032  | 6.714265367 | 1.202556633  | 0.258550829 | 0.258550829 | -4.987388503 |
| 1425188_s_at       | -0.10696604  | 8.877445199 | -1.202533719 | 0.258559288 | 0.258559288 | -4.987411165 |
| 1441655_at         | -0.104991802 | 3.358388544 | -1.202489076 | 0.258575771 | 0.258575771 | -4.987455315 |
| 1457518_at         | -0.093797461 | 4.196083765 | -1.202384868 | 0.258614249 | 0.258614249 | -4.987558369 |
| 1426495_at         | 0.083643912  | 8.172976177 | 1.202293056  | 0.258648154 | 0.258648154 | -4.987649158 |
| 1444621_at         | -0.122454422 | 4.148452975 | -1.202064684 | 0.258732504 | 0.258732504 | -4.987874965 |
| 1434437_x_at       | -0.09859293  | 10.28363045 | -1.20198821  | 0.258760755 | 0.258760755 | -4.987950575 |
| 1440258_at         | 0.100521107  | 4.447511202 | 1.201970217  | 0.258767403 | 0.258767403 | -4.987968363 |
| 1418570_at         | -0.083967118 | 7.258460777 | -1.201840659 | 0.25881527  | 0.25881527  | -4.988096446 |
| 1448167_at         | -0.088383247 | 8.118371155 | -1.201698426 | 0.25886783  | 0.25886783  | -4.988237049 |
| 1427844_a_at       | 0.141479835  | 6.245580707 | 1.201643033  | 0.258888301 | 0.258888301 | -4.988291804 |
| 1427928_s_at       | -0.082241258 | 8.68692153  | -1.201621433 | 0.258896284 | 0.258896284 | -4.988313155 |
| 1428616_at         | 0.103001912  | 9.900067425 | 1.201597896  | 0.258904983 | 0.258904983 | -4.98833642  |
| 1444136_at         | 0.118306562  | 5.98822169  | 1.201529722  | 0.258930181 | 0.258930181 | -4.988403804 |
| 1420509_at         | 0.083183708  | 8.056778872 | 1.201503047  | 0.258940042 | 0.258940042 | -4.988430169 |
| 1426547_at         | 0.093602188  | 3.849868354 | 1.201466574  | 0.258953524 | 0.258953524 | -4.988466219 |
| 1442981_at         | -0.085425317 | 3.767646639 | -1.201449393 | 0.258959875 | 0.258959875 | -4.988483199 |
| 1436770_x_at       | -0.100782752 | 4.410140203 | -1.201321921 | 0.259007    | 0.259007    | -4.988609183 |
| 1444190_at         | -0.214082483 | 5.389841366 | -1.201303649 | 0.259013756 | 0.259013756 | -4.98862724  |
| 1439305_at         | 0.139231196  | 7.350223978 | 1.201291976  | 0.259018072 | 0.259018072 | -4.988638776 |
| 1460066_at         | 0.234875305  | 5.890580884 | 1.201211722  | 0.259047745 | 0.259047745 | -4.988718086 |
| 1419417_at         | 0.150212951  | 7.27519937  | 1.201165222  | 0.25906494  | 0.25906494  | -4.988764038 |
| 1425947_at         | -0.086433479 | 3.342019681 | -1.201115859 | 0.259083194 | 0.259083194 | -4.988812817 |
| 1421945_a_at       | 0.079801918  | 7.386163917 | 1.200978975  | 0.259133819 | 0.259133819 | -4.988948075 |
| 1430881_at         | 0.077853644  | 3.427114827 | 1.200969434  | 0.259137348 | 0.259137348 | -4.988957503 |
| 1428591_at         | -0.134752489 | 3.90843866  | -1.200905716 | 0.259160916 | 0.259160916 | -4.989020461 |
| 1443659_at         | 0.077636825  | 3.115039088 | 1.200780183  | 0.259207354 | 0.259207354 | -4.989144488 |
| 1457481_at         | -0.111302329 | 3.888374285 | -1.200776204 | 0.259208826 | 0.259208826 | -4.989148419 |
| 1418454_at         | -0.326971588 | 5.035219714 | -1.200730528 | 0.259225724 | 0.259225724 | -4.989193545 |
| 1450163_a_at       | -0.080671196 | 6.671553981 | -1.200702499 | 0.259236094 | 0.259236094 | -4.989221235 |
| 1421009_at         | -0.110916042 | 4.365866532 | -1.200476804 | 0.259319608 | 0.259319608 | -4.989444191 |
| 1437653_at         | 0.081114515  | 5.782616769 | 1.200469122  | 0.259322451 | 0.259322451 | -4.989451779 |
| 1438353_at         | 0.098644148  | 8.160296434 | 1.200366184  | 0.259360549 | 0.259360549 | -4.989553457 |
| 1437183_at         | -0.106048171 | 6.178575178 | -1.20035588  | 0.259364363 | 0.259364363 | -4.989563635 |
| 1453481_at         | 0.103791743  | 5.190726732 | 1.200291234  | 0.259388291 | 0.259388291 | -4.989627486 |
| 1426158_at         | -0.091188329 | 4.83077291  | -1.200270309 | 0.259396037 | 0.259396037 | -4.989648154 |
| 1449008_at         | 0.135821324  | 9.668708926 | 1.20020457   | 0.259420372 | 0.259420372 | -4.989713082 |
| 1441138_at         | 0.090086004  | 5.435346409 | 1.200191502  | 0.25942521  | 0.25942521  | -4.989725988 |
| 1433279_at         | -0.107853405 | 4.624753719 | -1.200186769 | 0.259426962 | 0.259426962 | -4.989730662 |

|              |              |             |              |             |             |              |
|--------------|--------------|-------------|--------------|-------------|-------------|--------------|
| 1435503_at   | 0.124805448  | 4.70554608  | 1.200143671  | 0.259442917 | 0.259442917 | -4.989773227 |
| 1426568_at   | 0.186133018  | 4.509800193 | 1.200040293  | 0.259481192 | 0.259481192 | -4.98987532  |
| 1446450_at   | -0.09767795  | 3.862097193 | -1.199959551 | 0.25951109  | 0.25951109  | -4.989955056 |
| 1431463_at   | -0.109011799 | 3.270716938 | -1.199873094 | 0.259543106 | 0.259543106 | -4.990040429 |
| 1426874_at   | -0.077948781 | 9.670070723 | -1.199777726 | 0.259578426 | 0.259578426 | -4.990134598 |
| 1454532_at   | -0.100512724 | 6.858693722 | -1.199767238 | 0.259582311 | 0.259582311 | -4.990144954 |
| 1443204_at   | -0.112372683 | 6.757909493 | -1.199748535 | 0.259589238 | 0.259589238 | -4.990163421 |
| 1426814_at   | -0.113360651 | 9.249450412 | -1.199747204 | 0.259589731 | 0.259589731 | -4.990164735 |
| 1421250_at   | -0.088660475 | 4.962593718 | -1.199737396 | 0.259593364 | 0.259593364 | -4.990174419 |
| 1427561_a_at | -0.081226018 | 5.275262194 | -1.19950121  | 0.259680858 | 0.259680858 | -4.990407607 |
| 1453971_at   | 0.128139807  | 4.404329253 | 1.199459953  | 0.259696144 | 0.259696144 | -4.990448337 |
| 1443175_at   | -0.101734784 | 6.172704565 | -1.199427089 | 0.25970832  | 0.25970832  | -4.99048078  |
| 1445076_at   | 0.104852703  | 3.958826433 | 1.199374154  | 0.259727935 | 0.259727935 | -4.990533037 |
| 1436583_at   | 0.172615312  | 5.017503332 | 1.199336525  | 0.259741879 | 0.259741879 | -4.990570183 |
| 1451183_at   | -0.094602383 | 7.865727773 | -1.199301862 | 0.259754724 | 0.259754724 | -4.990604399 |
| 1436282_at   | 0.091894999  | 3.491543883 | 1.199290414  | 0.259758966 | 0.259758966 | -4.9906157   |
| 1433457_s_at | -0.118114198 | 9.335110312 | -1.199279705 | 0.259762935 | 0.259762935 | -4.990626271 |
| 1443398_at   | 0.104336917  | 3.965905126 | 1.199126659  | 0.259819657 | 0.259819657 | -4.990777338 |
| 1419596_at   | -0.117276104 | 5.046654371 | -1.199059807 | 0.259844437 | 0.259844437 | -4.990843321 |
| 1441766_at   | 0.099644235  | 3.384621192 | 1.198999682  | 0.259866725 | 0.259866725 | -4.990902663 |
| 1434016_at   | 0.085037563  | 7.772843199 | 1.198965161  | 0.259879523 | 0.259879523 | -4.990936732 |
| 1442262_at   | -0.327006899 | 6.746826393 | -1.19888147  | 0.25991055  | 0.25991055  | -4.991019328 |
| 1440234_at   | -0.089535133 | 5.153281194 | -1.198780036 | 0.25994816  | 0.25994816  | -4.991119428 |
| 1435754_at   | 0.094804835  | 9.046287104 | 1.198748912  | 0.259959701 | 0.259959701 | -4.991150141 |
| 1458097_at   | -0.100708908 | 5.001906023 | -1.198725863 | 0.259968248 | 0.259968248 | -4.991172886 |
| 1431670_at   | -0.135852008 | 4.295106333 | -1.19837955  | 0.260096695 | 0.260096695 | -4.991514591 |
| 1443738_at   | -0.100426948 | 4.327820408 | -1.19830891  | 0.260122902 | 0.260122902 | -4.991584283 |
| 1430754_at   | -0.101216487 | 5.555599404 | -1.198275436 | 0.260135322 | 0.260135322 | -4.991617307 |
| 1445094_at   | -0.080983808 | 3.600477183 | -1.19824588  | 0.260146288 | 0.260146288 | -4.991646465 |
| 1458566_at   | 0.131714084  | 7.267189262 | 1.198227011  | 0.260153288 | 0.260153288 | -4.991665079 |
| 1430629_at   | -0.076256476 | 3.80015777  | -1.198082782 | 0.260206807 | 0.260206807 | -4.991807356 |
| 1448617_at   | 0.178213015  | 6.688386306 | 1.198045682  | 0.260220576 | 0.260220576 | -4.991843952 |
| 1434124_x_at | 0.075286842  | 10.65110671 | 1.198014409  | 0.260232182 | 0.260232182 | -4.991874799 |
| 1431253_s_at | 0.111842203  | 4.22001972  | 1.197963861  | 0.260250942 | 0.260250942 | -4.991924658 |
| 1457920_at   | -0.110370281 | 4.417934304 | -1.197932592 | 0.260262548 | 0.260262548 | -4.9919555   |
| 1443677_at   | -0.096244188 | 4.174637243 | -1.197930996 | 0.26026314  | 0.26026314  | -4.991957074 |
| 1451717_s_at | -0.073893053 | 8.229621721 | -1.197868994 | 0.260286154 | 0.260286154 | -4.992018228 |
| 1438468_at   | 0.092409298  | 3.390902951 | 1.1978547    | 0.26029146  | 0.26029146  | -4.992032326 |
| 1421476_a_at | 0.17829463   | 5.753210063 | 1.197743896  | 0.260332593 | 0.260332593 | -4.992141608 |
| 1455723_at   | 0.127302326  | 7.530893945 | 1.197695653  | 0.260350503 | 0.260350503 | -4.992189186 |
| 1460504_at   | -0.113746766 | 3.93045387  | -1.197693226 | 0.260351404 | 0.260351404 | -4.992191579 |
| 1441097_at   | -0.105714982 | 6.006197211 | -1.197597664 | 0.260386885 | 0.260386885 | -4.99228582  |
| 1424010_at   | -0.094931978 | 11.06926988 | -1.197596344 | 0.260387375 | 0.260387375 | -4.992287121 |
| 1437114_at   | 0.123345516  | 4.871775406 | 1.197578206  | 0.26039411  | 0.26039411  | -4.992305008 |
| 1459833_x_at | -0.098550328 | 3.980409138 | -1.197557469 | 0.26040181  | 0.26040181  | -4.992325457 |
| 1430487_at   | 0.095282352  | 4.152502459 | 1.197459754  | 0.260438096 | 0.260438096 | -4.992421814 |
| 1445602_at   | 0.140438031  | 5.152578407 | 1.197433103  | 0.260447993 | 0.260447993 | -4.992448093 |
| 1448100_at   | 0.079462917  | 9.757500888 | 1.197371013  | 0.260471053 | 0.260471053 | -4.992509316 |
| 1457057_at   | -0.085586808 | 4.393447123 | -1.197328131 | 0.26048698  | 0.26048698  | -4.992551598 |
| 1417297_at   | 0.10484889   | 7.592815039 | 1.197327589  | 0.260487181 | 0.260487181 | -4.992552132 |
| 1431602_a_at | -0.135623987 | 7.556142073 | -1.197283803 | 0.260503445 | 0.260503445 | -4.992595304 |
| 1417925_at   | -0.099640796 | 4.975945732 | -1.197277388 | 0.260505828 | 0.260505828 | -4.992601629 |
| 1426687_at   | 0.142060634  | 6.460286909 | 1.197220633  | 0.260526909 | 0.260526909 | -4.992657586 |

|              |              |             |              |             |             |              |
|--------------|--------------|-------------|--------------|-------------|-------------|--------------|
| 1419916_at   | -0.097418281 | 4.575990821 | -1.197192464 | 0.260537374 | 0.260537374 | -4.992685359 |
| 1423791_at   | 0.079026955  | 10.04165173 | 1.197019831  | 0.26060151  | 0.26060151  | -4.992855551 |
| 1454500_at   | -0.0788473   | 3.209838193 | -1.197005616 | 0.260606791 | 0.260606791 | -4.992869565 |
| 1433629_s_at | 0.100219869  | 7.680946424 | 1.197002023  | 0.260608126 | 0.260608126 | -4.992873106 |
| 1456762_at   | 0.121719853  | 4.056985567 | 1.196983147  | 0.26061514  | 0.26061514  | -4.992891714 |
| 1432759_at   | 0.113305076  | 3.820282203 | 1.19696464   | 0.260622017 | 0.260622017 | -4.992909958 |
| 1425044_at   | -0.092609744 | 5.310172752 | -1.196642839 | 0.260741613 | 0.260741613 | -4.993227153 |
| 1451052_at   | 0.103735663  | 8.987298889 | 1.196598278  | 0.260758177 | 0.260758177 | -4.993271072 |
| 1433111_at   | -0.117838986 | 4.122306104 | -1.196431618 | 0.260820136 | 0.260820136 | -4.99343532  |
| 1428102_at   | -0.132895986 | 4.224359779 | -1.196401724 | 0.260831251 | 0.260831251 | -4.993464779 |
| 1459302_at   | 0.166032925  | 6.654737946 | 1.196359492  | 0.260846954 | 0.260846954 | -4.993506396 |
| 1420128_s_at | -0.092194362 | 4.902440946 | -1.196301276 | 0.260868602 | 0.260868602 | -4.993563763 |
| 1454809_at   | 0.088608752  | 8.003150548 | 1.196221396  | 0.260898307 | 0.260898307 | -4.993642475 |
| 1420770_at   | 0.092191518  | 3.895166295 | 1.196080918  | 0.260950555 | 0.260950555 | -4.993780891 |
| 1441686_at   | 0.09844257   | 3.306499148 | 1.196072488  | 0.26095369  | 0.26095369  | -4.993789196 |
| 1425478_x_at | 0.105660204  | 6.185280362 | 1.196018151  | 0.260973902 | 0.260973902 | -4.993842732 |
| 1420279_at   | 0.093835015  | 3.828570995 | 1.196005829  | 0.260978486 | 0.260978486 | -4.993854872 |
| 1420972_at   | 0.100487389  | 5.434867651 | 1.195996196  | 0.260982069 | 0.260982069 | -4.993864362 |
| 1418822_a_at | 0.129981299  | 10.58944386 | 1.195996109  | 0.260982101 | 0.260982101 | -4.993864448 |
| 1424068_at   | -0.085991881 | 7.292346381 | -1.195953208 | 0.26099806  | 0.26099806  | -4.993906714 |
| 1447310_at   | 0.089229518  | 5.989655045 | 1.195945261  | 0.261001017 | 0.261001017 | -4.993914544 |
| 1447733_x_at | 0.079084403  | 2.949508683 | 1.195893728  | 0.261020188 | 0.261020188 | -4.993965313 |
| 1425309_at   | 0.089220605  | 5.428779163 | 1.195885769  | 0.261023149 | 0.261023149 | -4.993973155 |
| 1440894_at   | -0.073715431 | 6.980457587 | -1.195810169 | 0.261051276 | 0.261051276 | -4.99404763  |
| 1425279_at   | 0.108987015  | 7.376411391 | 1.195742374  | 0.261076502 | 0.261076502 | -4.994114415 |
| 1434606_at   | 0.107382516  | 8.40674451  | 1.19572989   | 0.261081147 | 0.261081147 | -4.994126713 |
| 1431192_at   | -0.080012166 | 3.894967783 | -1.195709012 | 0.261088916 | 0.261088916 | -4.994147279 |
| 1436452_x_at | -0.085179189 | 11.56250386 | -1.195696993 | 0.261093389 | 0.261093389 | -4.994159119 |
| 1433627_at   | -0.081215184 | 9.563249618 | -1.195682393 | 0.261098822 | 0.261098822 | -4.994173501 |
| 1420067_at   | 0.093457261  | 4.836778614 | 1.195665656  | 0.26110505  | 0.26110505  | -4.994189987 |
| 1427798_x_at | -0.250880861 | 6.70066277  | -1.195608472 | 0.261126331 | 0.261126331 | -4.994246314 |
| 1439339_at   | -0.090642462 | 3.829944221 | -1.195572942 | 0.261139554 | 0.261139554 | -4.994281311 |
| 1420479_a_at | 0.118422884  | 10.57781049 | 1.195559573  | 0.261144529 | 0.261144529 | -4.994294479 |
| 1455062_at   | -0.106974162 | 5.076487739 | -1.195553868 | 0.261146653 | 0.261146653 | -4.994300099 |
| 1423425_at   | -0.134335214 | 7.25541474  | -1.195542836 | 0.261150758 | 0.261150758 | -4.994310964 |
| 1417371_at   | 0.087876826  | 8.960096639 | 1.195495969  | 0.261168202 | 0.261168202 | -4.994357127 |
| 1431455_at   | -0.088759061 | 4.914527345 | -1.195487841 | 0.261171227 | 0.261171227 | -4.994365131 |
| 1432132_at   | -0.098123299 | 3.45226704  | -1.195402935 | 0.261202832 | 0.261202832 | -4.994448757 |
| 1436890_at   | -0.089185748 | 7.268355981 | -1.195382033 | 0.261210613 | 0.261210613 | -4.994469342 |
| 1447515_at   | -0.100000932 | 3.756333335 | -1.195357942 | 0.261219581 | 0.261219581 | -4.994493069 |
| 1455302_at   | 0.084478045  | 3.177023672 | 1.195326344  | 0.261231344 | 0.261231344 | -4.994524188 |
| 1435444_at   | -0.094120499 | 7.728398178 | -1.195205178 | 0.261276454 | 0.261276454 | -4.994643512 |
| 1460328_at   | 0.152075355  | 8.978666599 | 1.195200865  | 0.26127806  | 0.26127806  | -4.994647759 |
| 1437840_s_at | 0.165300499  | 7.809825232 | 1.195171152  | 0.261289123 | 0.261289123 | -4.99467702  |
| 1435929_at   | 0.093730148  | 5.945494965 | 1.195067646  | 0.261327665 | 0.261327665 | -4.994778944 |
| 1440749_at   | -0.141147199 | 4.230002618 | -1.194919213 | 0.261382945 | 0.261382945 | -4.994925099 |
| 1428769_at   | 0.103784244  | 7.114180252 | 1.194770497  | 0.261438339 | 0.261438339 | -4.995071518 |
| 1457631_at   | 0.126323558  | 3.851827023 | 1.194763894  | 0.261440799 | 0.261440799 | -4.995078019 |
| 1452251_at   | 0.094885393  | 9.125426149 | 1.194676668  | 0.261473293 | 0.261473293 | -4.995163893 |
| 1426641_at   | -0.165938639 | 7.971532035 | -1.194333388 | 0.261601209 | 0.261601209 | -4.995501805 |
| 1431862_x_at | -0.109756769 | 7.239192868 | -1.194198784 | 0.26165138  | 0.26165138  | -4.995634286 |
| 1420501_at   | -0.10958535  | 7.659943498 | -1.194194275 | 0.261653061 | 0.261653061 | -4.995638724 |
| 1443176_at   | 0.090577897  | 3.787412918 | 1.194108503  | 0.261685035 | 0.261685035 | -4.995723138 |

|              |              |             |              |             |             |              |
|--------------|--------------|-------------|--------------|-------------|-------------|--------------|
| 1451564_at   | -0.127707292 | 5.193550673 | -1.194058719 | 0.261703595 | 0.261703595 | -4.995772131 |
| 1442640_at   | -0.091247466 | 4.805994099 | -1.194031658 | 0.261713684 | 0.261713684 | -4.995798762 |
| 1429857_at   | 0.157286181  | 6.716227395 | 1.193844969  | 0.261783295 | 0.261783295 | -4.995982472 |
| 1420013_s_at | 0.10050602   | 7.929878163 | 1.193800743  | 0.261799787 | 0.261799787 | -4.996025988 |
| 1443987_at   | -0.088813215 | 5.987482786 | -1.193728594 | 0.261826695 | 0.261826695 | -4.996096979 |
| 1423145_a_at | -0.164222174 | 5.526015222 | -1.193723007 | 0.261828779 | 0.261828779 | -4.996102476 |
| 1420935_a_at | 0.128286733  | 9.849803767 | 1.193605939  | 0.261872444 | 0.261872444 | -4.996217657 |
| 1439384_at   | 0.074773313  | 3.638825839 | 1.193372244  | 0.261959627 | 0.261959627 | -4.996447561 |
| 1432748_at   | -0.094489441 | 4.218133551 | -1.193140059 | 0.26204627  | 0.26204627  | -4.99667595  |
| 1459575_at   | -0.101686232 | 4.199297491 | -1.193095804 | 0.262062786 | 0.262062786 | -4.996719477 |
| 1425490_a_at | -0.12626578  | 5.853238312 | -1.193061329 | 0.262075654 | 0.262075654 | -4.996753384 |
| 1443718_at   | 0.084188462  | 3.132837354 | 1.193048873  | 0.262080303 | 0.262080303 | -4.996765636 |
| 1448902_at   | 0.169086286  | 7.213832626 | 1.193039111  | 0.262083947 | 0.262083947 | -4.996775237 |
| 1433981_s_at | 0.09868929   | 8.174766337 | 1.192919417  | 0.262128626 | 0.262128626 | -4.996892954 |
| 1438878_at   | -0.104677559 | 9.494970459 | -1.192915364 | 0.262130139 | 0.262130139 | -4.99689694  |
| 1423555_a_at | 0.167545726  | 5.246441268 | 1.192851371  | 0.262154029 | 0.262154029 | -4.996959873 |
| 1424710_a_at | -0.094897029 | 10.5515763  | -1.192771117 | 0.262183992 | 0.262183992 | -4.997038794 |
| 1431937_at   | -0.180278596 | 4.264114411 | -1.192717464 | 0.262204025 | 0.262204025 | -4.997091553 |
| 1459487_at   | 0.084270861  | 3.708505226 | 1.192688729  | 0.262214755 | 0.262214755 | -4.997119809 |
| 1440670_at   | -0.120270435 | 4.503347328 | -1.192635056 | 0.262234797 | 0.262234797 | -4.997172586 |
| 1421597_a_at | -0.088205104 | 5.13435546  | -1.192481194 | 0.262292259 | 0.262292259 | -4.99732387  |
| 1438111_at   | -0.12560328  | 4.157306425 | -1.192420955 | 0.262314758 | 0.262314758 | -4.997383096 |
| 1442554_s_at | -0.086168786 | 7.13821043  | -1.192243505 | 0.262381046 | 0.262381046 | -4.997557549 |
| 1445166_at   | -0.09077952  | 3.648812199 | -1.192216117 | 0.262391278 | 0.262391278 | -4.997584473 |
| 1426465_at   | 0.098018112  | 8.730088418 | 1.192156038  | 0.262413725 | 0.262413725 | -4.997643533 |
| 1457535_at   | 0.165069271  | 5.725281826 | 1.192062602  | 0.262448638 | 0.262448638 | -4.997735378 |
| 1439409_x_at | -0.105500331 | 3.651225688 | -1.19205008  | 0.262453317 | 0.262453317 | -4.997747687 |
| 1417028_a_at | 0.096646628  | 8.924127554 | 1.192022394  | 0.262463663 | 0.262463663 | -4.997774901 |
| 1442386_at   | -0.106994189 | 5.597310927 | -1.191992873 | 0.262474695 | 0.262474695 | -4.997803917 |
| 1416892_s_at | 0.125905097  | 8.596569914 | 1.191912469  | 0.262504743 | 0.262504743 | -4.997882946 |
| 1457489_at   | 0.108014445  | 7.316297107 | 1.191907594  | 0.262506565 | 0.262506565 | -4.997887738 |
| 1420604_at   | -0.112187634 | 3.913182058 | -1.191883605 | 0.262515531 | 0.262515531 | -4.997911315 |
| 1440112_at   | 0.12669238   | 6.160678311 | 1.191807261  | 0.262544066 | 0.262544066 | -4.997986349 |
| 1447355_at   | -0.090228777 | 3.317343869 | -1.191682562 | 0.262590679 | 0.262590679 | -4.9981089   |
| 1418419_at   | -0.090640277 | 8.402675043 | -1.19165587  | 0.262600658 | 0.262600658 | -4.998135131 |
| 1415906_at   | 0.074397169  | 13.16962405 | 1.191459811  | 0.262673963 | 0.262673963 | -4.998327792 |
| 1421598_at   | -0.14631191  | 4.969301629 | -1.191297973 | 0.262734484 | 0.262734484 | -4.998486807 |
| 1423891_at   | -0.082301276 | 5.309635196 | -1.191242065 | 0.262755395 | 0.262755395 | -4.998541737 |
| 1446881_at   | 0.100971919  | 3.236278722 | 1.191164923  | 0.262784249 | 0.262784249 | -4.998617525 |
| 1424076_at   | -0.098981961 | 7.070914025 | -1.190993586 | 0.262848345 | 0.262848345 | -4.998785845 |
| 1447589_at   | -0.116813788 | 3.649590656 | -1.190989799 | 0.262849762 | 0.262849762 | -4.998789565 |
| 1438944_at   | -0.107707889 | 4.169369082 | -1.190814699 | 0.262915279 | 0.262915279 | -4.998961564 |
| 1446075_at   | -0.112379386 | 5.065107025 | -1.190808297 | 0.262917675 | 0.262917675 | -4.998967852 |
| 1453768_a_at | 0.130786904  | 6.358127236 | 1.190717723  | 0.26295157  | 0.26295157  | -4.999056814 |
| 1455184_at   | -0.083247079 | 7.864491539 | -1.190661313 | 0.262972682 | 0.262972682 | -4.999112218 |
| 1434232_a_at | 0.12127823   | 8.218793761 | 1.190635411  | 0.262982377 | 0.262982377 | -4.999137658 |
| 1446908_at   | 0.125930054  | 4.155758273 | 1.190552539  | 0.263013396 | 0.263013396 | -4.999219048 |
| 1432633_at   | 0.092241627  | 4.174316029 | 1.190528063  | 0.263022558 | 0.263022558 | -4.999243084 |
| 1459064_at   | 0.080348889  | 3.150247286 | 1.190451353  | 0.263051274 | 0.263051274 | -4.999318417 |
| 1428353_at   | -0.083020609 | 8.432984715 | -1.190443206 | 0.263054324 | 0.263054324 | -4.999326418 |
| 1449987_at   | 0.214324769  | 5.245669064 | 1.190430063  | 0.263059245 | 0.263059245 | -4.999339325 |
| 1441273_at   | -0.08472515  | 4.786358029 | -1.190422477 | 0.263062084 | 0.263062084 | -4.999346774 |
| 1442407_at   | 0.116650271  | 4.767896922 | 1.190397181  | 0.263071555 | 0.263071555 | -4.999371615 |

|              |              |             |              |             |             |              |
|--------------|--------------|-------------|--------------|-------------|-------------|--------------|
| 1447991_at   | -0.081836613 | 3.399372534 | -1.190359882 | 0.26308552  | 0.26308552  | -4.999408242 |
| 1445028_at   | 0.106517291  | 4.15160683  | 1.19031145   | 0.263103653 | 0.263103653 | -4.9994558   |
| 1456222_at   | -0.089738935 | 5.496112662 | -1.190259945 | 0.263122938 | 0.263122938 | -4.999506374 |
| 1416044_at   | -0.117308563 | 8.988846435 | -1.190258887 | 0.263123335 | 0.263123335 | -4.999507414 |
| 1432918_at   | 0.114691925  | 6.016108943 | 1.190195706  | 0.263146993 | 0.263146993 | -4.99956945  |
| 1426958_at   | -0.108502317 | 7.834335551 | -1.190167785 | 0.263157449 | 0.263157449 | -4.999596866 |
| 1459008_at   | 0.100161411  | 8.414268519 | 1.190155177  | 0.26316217  | 0.26316217  | -4.999609245 |
| 1444758_at   | 0.106635529  | 5.539064677 | 1.190093326  | 0.263185334 | 0.263185334 | -4.999669973 |
| 1448518_at   | 0.081913791  | 6.418113058 | 1.190053271  | 0.263200335 | 0.263200335 | -4.999709298 |
| 1441282_at   | -0.144194935 | 6.472314938 | -1.1900268   | 0.26321025  | 0.26321025  | -4.999735287 |
| 1458840_at   | -0.105517722 | 5.176902489 | -1.189825089 | 0.263285808 | 0.263285808 | -4.999933311 |
| 1435917_at   | 0.203332541  | 7.499226721 | 1.189731883  | 0.263320728 | 0.263320728 | -5.000024806 |
| 1431477_at   | -0.124515215 | 4.301712966 | -1.189714292 | 0.263327319 | 0.263327319 | -5.000042074 |
| 1452883_a_at | 0.087655643  | 9.085350652 | 1.189668995  | 0.263344292 | 0.263344292 | -5.000086537 |
| 1448884_at   | -0.08212926  | 10.16090027 | -1.189600555 | 0.263369937 | 0.263369937 | -5.000153714 |
| 1456486_at   | 0.168304087  | 6.290024258 | 1.189580297  | 0.263377528 | 0.263377528 | -5.000173598 |
| 1433401_at   | -0.109990927 | 5.55533211  | -1.189535572 | 0.263394289 | 0.263394289 | -5.000217496 |
| 1456248_at   | 0.088624497  | 4.787976818 | 1.189482566  | 0.263414154 | 0.263414154 | -5.00026952  |
| 1424350_s_at | 0.173322823  | 8.190984512 | 1.189417721  | 0.263438457 | 0.263438457 | -5.000333162 |
| 1417936_at   | -0.115773125 | 5.717594806 | -1.189410272 | 0.263441249 | 0.263441249 | -5.000340473 |
| 1443937_at   | -0.08783806  | 4.952761099 | -1.189392926 | 0.263447751 | 0.263447751 | -5.000357497 |
| 1457470_at   | -0.130511163 | 7.673972153 | -1.189322467 | 0.263474161 | 0.263474161 | -5.000426645 |
| 1430314_at   | -0.115820981 | 4.521724489 | -1.189277591 | 0.263490983 | 0.263490983 | -5.000470684 |
| 1416199_at   | -0.112268401 | 7.078072817 | -1.189277373 | 0.263491065 | 0.263491065 | -5.000470898 |
| 1426682_at   | 0.078843182  | 10.78803468 | 1.189118725  | 0.263550542 | 0.263550542 | -5.000626579 |
| 1420146_at   | -0.112498494 | 4.842425231 | -1.189045959 | 0.263577826 | 0.263577826 | -5.00069798  |
| 1456145_at   | -0.134493524 | 6.979264048 | -1.188897693 | 0.263633425 | 0.263633425 | -5.000843454 |
| 1442975_at   | -0.113120261 | 4.489151376 | -1.188892437 | 0.263635396 | 0.263635396 | -5.000848611 |
| 1445784_at   | -0.100179717 | 4.442341643 | -1.188825967 | 0.263660325 | 0.263660325 | -5.000913825 |
| 1429509_at   | -0.08874867  | 7.219153195 | -1.188762846 | 0.263684    | 0.263684    | -5.000975751 |
| 1436068_at   | -0.110457863 | 6.951536619 | -1.188700385 | 0.26370743  | 0.26370743  | -5.001037028 |
| 1439595_at   | 0.091613104  | 3.455417711 | 1.188657596  | 0.263723481 | 0.263723481 | -5.001079003 |
| 1443478_at   | -0.110375356 | 3.812811743 | -1.188641885 | 0.263729375 | 0.263729375 | -5.001094416 |
| 1430676_at   | 0.116382699  | 4.087570134 | 1.188567182  | 0.2637574   | 0.2637574   | -5.001167696 |
| 1425087_at   | -0.096010825 | 6.353544826 | -1.188434949 | 0.263807014 | 0.263807014 | -5.001297403 |
| 1424512_a_at | 0.093914272  | 9.11510642  | 1.188382937  | 0.26382653  | 0.26382653  | -5.001348419 |
| 1436961_at   | 0.114646614  | 5.240632459 | 1.18833654   | 0.263843941 | 0.263843941 | -5.001393925 |
| 1452852_at   | 0.081925427  | 9.427011288 | 1.188297173  | 0.263858715 | 0.263858715 | -5.001432536 |
| 1419383_at   | -0.113557347 | 5.942564119 | -1.188251322 | 0.263875923 | 0.263875923 | -5.001477505 |
| 1452013_at   | -0.11009741  | 4.504237469 | -1.188246278 | 0.263877815 | 0.263877815 | -5.001482452 |
| 1435993_at   | 0.163451608  | 6.287490861 | 1.18819243   | 0.263898026 | 0.263898026 | -5.001535263 |
| 1421579_at   | -0.079471689 | 6.023912186 | -1.188169631 | 0.263906583 | 0.263906583 | -5.001557622 |
| 1436799_at   | 0.115928896  | 6.506752754 | 1.188132417  | 0.263920551 | 0.263920551 | -5.001594118 |
| 1428851_at   | -0.134267417 | 7.90288139  | -1.18805137  | 0.263950975 | 0.263950975 | -5.001673598 |
| 1435704_at   | 0.278067649  | 6.88994109  | 1.188043391  | 0.26395397  | 0.26395397  | -5.001681422 |
| 1442906_at   | -0.136083098 | 5.394371443 | -1.187942499 | 0.263991846 | 0.263991846 | -5.001780357 |
| 1429389_at   | 0.092470399  | 6.981357779 | 1.187926547  | 0.263997836 | 0.263997836 | -5.001795999 |
| 1457640_x_at | 0.072411838  | 5.192784713 | 1.187908866  | 0.264004474 | 0.264004474 | -5.001813336 |
| 1416575_at   | 0.074132706  | 7.27797183  | 1.187879608  | 0.264015459 | 0.264015459 | -5.001842025 |
| 1415766_at   | -0.105898016 | 9.515441543 | -1.187789173 | 0.264049416 | 0.264049416 | -5.001930698 |
| 1425662_at   | -0.108808102 | 4.010112828 | -1.187780574 | 0.264052645 | 0.264052645 | -5.001939129 |
| 1425795_a_at | 0.101201724  | 9.130450971 | 1.187744066  | 0.264066354 | 0.264066354 | -5.001974924 |
| 1422695_at   | 0.180240507  | 4.594527599 | 1.187724421  | 0.264073732 | 0.264073732 | -5.001994185 |

|              |              |             |              |             |             |              |
|--------------|--------------|-------------|--------------|-------------|-------------|--------------|
| 1446281_at   | 0.089981754  | 5.54661964  | 1.187590041  | 0.2641242   | 0.2641242   | -5.002125933 |
| 1448230_at   | 0.078042673  | 9.689244014 | 1.187492588  | 0.264160804 | 0.264160804 | -5.00222147  |
| 1447712_x_at | -0.106125806 | 4.051436723 | -1.187482495 | 0.264164595 | 0.264164595 | -5.002231364 |
| 1453261_at   | -0.080117786 | 5.704280206 | -1.18742862  | 0.264184833 | 0.264184833 | -5.002284177 |
| 1437185_s_at | 0.081903328  | 14.11242132 | 1.187368953  | 0.264207248 | 0.264207248 | -5.002342666 |
| 1429833_at   | -0.074912351 | 5.908466815 | -1.187298664 | 0.264233656 | 0.264233656 | -5.002411565 |
| 1446596_at   | -0.134220797 | 6.662304439 | -1.187195225 | 0.264272522 | 0.264272522 | -5.002512953 |
| 1457890_at   | -0.145609586 | 4.558016223 | -1.187186255 | 0.264275893 | 0.264275893 | -5.002521745 |
| 1417352_s_at | 0.095245149  | 9.906758532 | 1.187128789  | 0.264297487 | 0.264297487 | -5.002578068 |
| 1425663_at   | 0.089146728  | 4.780981537 | 1.187038801  | 0.264331305 | 0.264331305 | -5.002666263 |
| 1436058_at   | -0.179062071 | 5.985783637 | -1.18685157  | 0.264401679 | 0.264401679 | -5.002849749 |
| 1426712_at   | 0.19655727   | 5.1141941   | 1.186834682  | 0.264408027 | 0.264408027 | -5.002866298 |
| 1442751_at   | -0.106259114 | 5.788349651 | -1.186822834 | 0.264412481 | 0.264412481 | -5.002877909 |
| 1445458_at   | -0.089158417 | 3.986290929 | -1.186695906 | 0.264460199 | 0.264460199 | -5.003002283 |
| 1450886_at   | 0.116789685  | 7.006548925 | 1.186669776  | 0.264470024 | 0.264470024 | -5.003027887 |
| 1429171_a_at | 0.095999469  | 7.693936516 | 1.186625118  | 0.264486815 | 0.264486815 | -5.003071644 |
| 1450460_at   | 0.139337089  | 7.58019569  | 1.186618613  | 0.264489261 | 0.264489261 | -5.003078017 |
| 1431646_a_at | 0.092381323  | 7.786513743 | 1.186507595  | 0.264531007 | 0.264531007 | -5.00318679  |
| 1438743_at   | -0.092313381 | 4.413178262 | -1.186495923 | 0.264535396 | 0.264535396 | -5.003198225 |
| 1448880_at   | 0.073407778  | 10.03294164 | 1.186444884  | 0.264554591 | 0.264554591 | -5.003248229 |
| 1428585_at   | 0.076402561  | 10.38918036 | 1.186432276  | 0.264559333 | 0.264559333 | -5.003260582 |
| 1448540_a_at | 0.10127586   | 9.079416888 | 1.186395472  | 0.264573174 | 0.264573174 | -5.003296638 |
| 1419421_at   | -0.123333218 | 7.507410657 | -1.186378496 | 0.264579559 | 0.264579559 | -5.003313269 |
| 1458803_at   | -0.089043437 | 4.551151913 | -1.186352281 | 0.264589419 | 0.264589419 | -5.003338951 |
| 1434898_at   | 0.086912306  | 9.375439867 | 1.186273352  | 0.264619107 | 0.264619107 | -5.003416271 |
| 1457281_at   | 0.156495138  | 8.812147146 | 1.186229797  | 0.264635491 | 0.264635491 | -5.003458938 |
| 1434048_at   | -0.097256782 | 6.147240891 | -1.186003313 | 0.264720699 | 0.264720699 | -5.003680782 |
| 1439921_at   | -0.082647177 | 3.529224508 | -1.185931626 | 0.264747674 | 0.264747674 | -5.003750995 |
| 1454218_at   | 0.095130031  | 4.18161577  | 1.18585409   | 0.264776852 | 0.264776852 | -5.003826932 |
| 1441129_at   | 0.171025421  | 6.090650517 | 1.185822808  | 0.264788625 | 0.264788625 | -5.003857568 |
| 1432976_at   | 0.105847181  | 3.518736046 | 1.185780661  | 0.264804487 | 0.264804487 | -5.003898844 |
| 1437912_at   | 0.135817592  | 5.721542148 | 1.185774824  | 0.264806685 | 0.264806685 | -5.003904561 |
| 1423820_at   | -0.127813246 | 9.509477563 | -1.185695771 | 0.264836439 | 0.264836439 | -5.003981977 |
| 1437186_at   | 0.076539274  | 7.086371418 | 1.18567435   | 0.264844502 | 0.264844502 | -5.004002954 |
| 1420443_at   | -0.091470993 | 5.574760719 | -1.185589127 | 0.264876582 | 0.264876582 | -5.004086407 |
| 1436335_at   | 0.098266483  | 7.37466109  | 1.185579848  | 0.264880076 | 0.264880076 | -5.004095493 |
| 1435614_s_at | -0.104478039 | 4.320950974 | -1.185564578 | 0.264885824 | 0.264885824 | -5.004110446 |
| 1452077_at   | 1.870683991  | 5.767362573 | 1.185513511  | 0.26490505  | 0.26490505  | -5.004160449 |
| 1435299_at   | -0.07750656  | 8.081139308 | -1.185440613 | 0.264932495 | 0.264932495 | -5.004231826 |
| 1419219_at   | -0.12484158  | 3.884110672 | -1.185372687 | 0.264958071 | 0.264958071 | -5.004298333 |
| 1424690_at   | -0.097298799 | 5.061582268 | -1.18536485  | 0.264961022 | 0.264961022 | -5.004306006 |
| 1451935_a_at | -0.125382903 | 9.88896608  | -1.185202383 | 0.265022204 | 0.265022204 | -5.004465066 |
| 1430566_at   | 0.187529154  | 6.779318171 | 1.185151963  | 0.265041194 | 0.265041194 | -5.004514427 |
| 1421341_at   | 0.079582238  | 4.693145627 | 1.185076708  | 0.265069539 | 0.265069539 | -5.004588096 |
| 1449107_at   | 0.079774036  | 9.119858903 | 1.185047665  | 0.265080479 | 0.265080479 | -5.004616527 |
| 1438938_x_at | 0.083810189  | 10.10511516 | 1.185039278  | 0.265083638 | 0.265083638 | -5.004624736 |
| 1442853_at   | -0.099969964 | 4.524962933 | -1.184913297 | 0.265131097 | 0.265131097 | -5.004748054 |
| 1460414_at   | -0.107513066 | 8.009857871 | -1.184898658 | 0.265136612 | 0.265136612 | -5.004762382 |
| 1421558_at   | -0.079269366 | 6.387047562 | -1.184816996 | 0.265167379 | 0.265167379 | -5.004842312 |
| 1422005_at   | 0.131598185  | 6.428572297 | 1.184716942  | 0.265205079 | 0.265205079 | -5.004940237 |
| 1437643_at   | -0.105895355 | 7.532394566 | -1.184687379 | 0.26521622  | 0.26521622  | -5.004969171 |
| 1441811_x_at | -0.092495555 | 8.042597314 | -1.184526583 | 0.265276819 | 0.265276819 | -5.005126531 |
| 1448710_at   | 0.194331615  | 6.52094269  | 1.184499302  | 0.265287102 | 0.265287102 | -5.005153229 |



|              |              |             |              |             |             |              |
|--------------|--------------|-------------|--------------|-------------|-------------|--------------|
| 1438906_at   | 0.128181112  | 7.291527456 | 1.184325067  | 0.265352781 | 0.265352781 | -5.005323722 |
| 1417237_at   | 0.086573478  | 6.856738966 | 1.184170977  | 0.265410877 | 0.265410877 | -5.005474489 |
| 1430857_s_at | -0.097625552 | 6.742040542 | -1.184106983 | 0.265435007 | 0.265435007 | -5.005537098 |
| 1459397_at   | -0.073660768 | 4.94880988  | -1.184065534 | 0.265450637 | 0.265450637 | -5.005577648 |
| 1447749_at   | 0.127402424  | 4.876131569 | 1.183992996  | 0.265477992 | 0.265477992 | -5.005648612 |
| 1427517_at   | -0.081133287 | 3.314662524 | -1.183982839 | 0.265481823 | 0.265481823 | -5.005658549 |
| 1439758_at   | -0.101031352 | 4.046330004 | -1.183982405 | 0.265481987 | 0.265481987 | -5.005658974 |
| 1441569_at   | -0.086094572 | 3.32600351  | -1.183970785 | 0.265486369 | 0.265486369 | -5.005670341 |
| 1423004_at   | -0.101397508 | 3.789851095 | -1.183911076 | 0.265508889 | 0.265508889 | -5.005728752 |
| 1456117_at   | 0.075547022  | 8.9591479   | 1.183859326  | 0.265528408 | 0.265528408 | -5.005779375 |
| 1447811_s_at | 0.124446237  | 4.685140862 | 1.18378039   | 0.265558184 | 0.265558184 | -5.005856588 |
| 1423442_a_at | 0.074778218  | 7.912303612 | 1.183650774  | 0.265607082 | 0.265607082 | -5.005983368 |
| 1446921_at   | -0.081659707 | 10.05168662 | -1.183574956 | 0.265635688 | 0.265635688 | -5.006057523 |
| 1448818_at   | 0.185220604  | 8.358648745 | 1.183539062  | 0.265649231 | 0.265649231 | -5.006092629 |
| 1425247_a_at | -0.073081057 | 4.792416404 | -1.183456398 | 0.265680425 | 0.265680425 | -5.006173473 |
| 1455562_at   | -0.133544647 | 8.509263814 | -1.183389905 | 0.265705517 | 0.265705517 | -5.0062385   |
| 1433013_at   | 0.118406298  | 3.627038128 | 1.183328426  | 0.26572872  | 0.26572872  | -5.006298621 |
| 1432027_a_at | 0.105886916  | 7.15597976  | 1.183322238  | 0.265731056 | 0.265731056 | -5.006304672 |
| 1416266_at   | -0.107392369 | 4.062394764 | -1.183282749 | 0.26574596  | 0.26574596  | -5.006343288 |
| 1428520_at   | -0.092718784 | 8.3966581   | -1.183187445 | 0.265781934 | 0.265781934 | -5.00643648  |
| 1455987_at   | -0.084888284 | 8.198583001 | -1.183149559 | 0.265796235 | 0.265796235 | -5.006473525 |
| 1456853_at   | 0.111154663  | 4.987645288 | 1.183141811  | 0.26579916  | 0.26579916  | -5.0064811   |
| 1436800_at   | 0.078862804  | 4.715022073 | 1.182949563  | 0.265871742 | 0.265871742 | -5.006669067 |
| 1420349_at   | 0.123929279  | 7.372418372 | 1.182801703  | 0.265927576 | 0.265927576 | -5.00681362  |
| 1442384_at   | 0.174931579  | 4.201801171 | 1.182793853  | 0.265930541 | 0.265930541 | -5.006821294 |
| 1423911_at   | 0.085745168  | 9.524182994 | 1.18260116   | 0.266003319 | 0.266003319 | -5.007009656 |
| 1416154_at   | -0.189819551 | 5.476185373 | -1.182546964 | 0.266023792 | 0.266023792 | -5.007062631 |
| 1418859_at   | 0.095864491  | 7.865354809 | 1.182519868  | 0.266034028 | 0.266034028 | -5.007089115 |
| 1419537_at   | 0.236857323  | 4.927569965 | 1.182405846  | 0.266077105 | 0.266077105 | -5.00720056  |
| 1433364_at   | 0.09758875   | 4.371013267 | 1.182231859  | 0.266142846 | 0.266142846 | -5.007370599 |
| 1432999_at   | -0.087990235 | 4.585674587 | -1.182231535 | 0.266142969 | 0.266142969 | -5.007370915 |
| 1435717_at   | -0.080977304 | 9.07681652  | -1.182158601 | 0.266170531 | 0.266170531 | -5.007442189 |
| 1451280_at   | 0.182378558  | 4.493708431 | 1.18187532   | 0.266277607 | 0.266277607 | -5.007718991 |
| 1458320_at   | -0.087617735 | 3.697460066 | -1.1818243   | 0.266296896 | 0.266296896 | -5.00776884  |
| 1444192_at   | 0.165062817  | 5.838739028 | 1.181799526  | 0.266306262 | 0.266306262 | -5.007793045 |
| 1418291_at   | 0.075306937  | 7.226958816 | 1.181757132  | 0.266322291 | 0.266322291 | -5.007834463 |
| 1447264_at   | -0.079107453 | 4.10218007  | -1.181616702 | 0.266375391 | 0.266375391 | -5.007971654 |
| 1429513_at   | -0.098801403 | 3.719868698 | -1.181533271 | 0.266406943 | 0.266406943 | -5.008053156 |
| 1454774_at   | 0.086013169  | 11.26899376 | 1.181482987  | 0.26642596  | 0.26642596  | -5.008102275 |
| 1438816_at   | 0.099946191  | 8.049638904 | 1.181465482  | 0.266432581 | 0.266432581 | -5.008119374 |
| 1437770_at   | 0.101614951  | 5.050379068 | 1.181370083  | 0.266468665 | 0.266468665 | -5.008212558 |
| 1426903_at   | 0.090754336  | 9.67128614  | 1.181329682  | 0.266483948 | 0.266483948 | -5.00825202  |
| 1421651_at   | -0.093663677 | 3.51134536  | -1.181316449 | 0.266488953 | 0.266488953 | -5.008264945 |
| 1457379_at   | -0.125341587 | 5.362121268 | -1.181190308 | 0.266536674 | 0.266536674 | -5.008388145 |
| 1424102_at   | 0.087968927  | 8.407967786 | 1.180927054  | 0.266636289 | 0.266636289 | -5.008645232 |
| 1443941_at   | -0.089348969 | 5.843124648 | -1.180871651 | 0.266657257 | 0.266657257 | -5.008699332 |
| 1426949_s_at | 0.08424635   | 10.05923086 | 1.1808433    | 0.266667988 | 0.266667988 | -5.008727015 |
| 1434715_at   | -0.071534138 | 4.781631612 | -1.180740608 | 0.266706858 | 0.266706858 | -5.008827286 |
| 1417499_at   | 0.074839624  | 9.467762757 | 1.18069796   | 0.266723002 | 0.266723002 | -5.008868926 |
| 1435058_x_at | 0.140421275  | 3.251773082 | 1.180591409  | 0.26676334  | 0.26676334  | -5.008972955 |
| 1426510_at   | -0.087446406 | 8.135368106 | -1.180587458 | 0.266764835 | 0.266764835 | -5.008976813 |
| 1421126_at   | 0.107899767  | 3.952059917 | 1.18043916   | 0.266820986 | 0.266820986 | -5.00912159  |
| 1434461_at   | 0.099846627  | 8.670727066 | 1.18042945   | 0.266824663 | 0.266824663 | -5.009131068 |

|              |              |             |              |             |             |              |
|--------------|--------------|-------------|--------------|-------------|-------------|--------------|
| 1434924_at   | -0.104034342 | 9.618973712 | -1.180261835 | 0.266888139 | 0.266888139 | -5.009294687 |
| 1421219_at   | -0.175421759 | 4.98415394  | -1.180239302 | 0.266896674 | 0.266896674 | -5.009316682 |
| 1442720_at   | -0.080381497 | 5.226854639 | -1.180228437 | 0.266900789 | 0.266900789 | -5.009327287 |
| 1450702_at   | -0.101477293 | 4.247398024 | -1.180200658 | 0.26691131  | 0.26691131  | -5.009354401 |
| 1426787_at   | -0.13268031  | 6.51369153  | -1.18018976  | 0.266915438 | 0.266915438 | -5.009365038 |
| 1452249_at   | 0.104804312  | 9.748449529 | 1.180154408  | 0.266928829 | 0.266928829 | -5.009399544 |
| 1439463_x_at | 0.095327079  | 11.961154   | 1.18012112   | 0.266941438 | 0.266941438 | -5.009432034 |
| 1437636_at   | -0.086124253 | 3.56316286  | -1.180095529 | 0.266951132 | 0.266951132 | -5.009457012 |
| 1424400_a_at | -0.112091591 | 4.318731813 | -1.180066536 | 0.266962115 | 0.266962115 | -5.009485309 |
| 1448304_a_at | 0.081934732  | 9.987986135 | 1.179993858  | 0.266989649 | 0.266989649 | -5.009556241 |
| 1419391_at   | -0.672165112 | 7.864315116 | -1.179987991 | 0.266991871 | 0.266991871 | -5.009561966 |
| 1436623_at   | -0.089729257 | 5.952966571 | -1.179886525 | 0.267030315 | 0.267030315 | -5.009660989 |
| 1421140_a_at | 0.12028081   | 9.057264739 | 1.179854254  | 0.267042543 | 0.267042543 | -5.009692482 |
| 1456608_at   | -0.090867898 | 3.936002061 | -1.179837518 | 0.267048884 | 0.267048884 | -5.009708814 |
| 1433166_at   | 0.112732935  | 3.677607857 | 1.179830546  | 0.267051526 | 0.267051526 | -5.009715617 |
| 1418562_at   | 0.114163414  | 10.89320047 | 1.179765702  | 0.267076098 | 0.267076098 | -5.009778895 |
| 1455946_x_at | 0.072025189  | 3.601134188 | 1.179740323  | 0.267085716 | 0.267085716 | -5.009803659 |
| 1459475_at   | 0.07234706   | 4.031163512 | 1.179688326  | 0.267105422 | 0.267105422 | -5.009854398 |
| 1446811_at   | -0.127712824 | 6.74111458  | -1.179648326 | 0.267120581 | 0.267120581 | -5.009893428 |
| 1434211_at   | 0.123285551  | 6.334770826 | 1.179370049  | 0.267226067 | 0.267226067 | -5.010164935 |
| 1438465_at   | 0.210763253  | 5.158133226 | 1.179339308  | 0.267237721 | 0.267237721 | -5.010194925 |
| 1451376_at   | 0.085822724  | 6.11055695  | 1.179334322  | 0.267239612 | 0.267239612 | -5.010199789 |
| 1446202_at   | 0.085192039  | 5.543516328 | 1.179264572  | 0.267266058 | 0.267266058 | -5.010267834 |
| 1448406_at   | 0.21829329   | 10.76475437 | 1.179185885  | 0.267295895 | 0.267295895 | -5.010344593 |
| 1418620_at   | 0.280108318  | 5.543562794 | 1.179127433  | 0.267318061 | 0.267318061 | -5.01040161  |
| 1427457_a_at | 0.417575049  | 6.933975853 | 1.179076064  | 0.267337542 | 0.267337542 | -5.010451718 |
| 1421581_at   | 0.094677802  | 4.289658006 | 1.179064709  | 0.267341849 | 0.267341849 | -5.010462793 |
| 1441822_at   | -0.097397558 | 4.825306449 | -1.178935988 | 0.267390671 | 0.267390671 | -5.010588345 |
| 1443320_at   | -0.119053394 | 5.031289979 | -1.178881545 | 0.267411322 | 0.267411322 | -5.010641444 |
| 1435838_at   | -0.101809434 | 3.647541327 | -1.178811775 | 0.26743779  | 0.26743779  | -5.010709489 |
| 1435357_at   | 0.112515751  | 7.36758927  | 1.178799122  | 0.26744259  | 0.26744259  | -5.010721829 |
| 1419957_at   | -0.113257785 | 4.363756296 | -1.178781947 | 0.267449105 | 0.267449105 | -5.010738579 |
| 1430921_at   | -0.130411771 | 3.787817583 | -1.178764392 | 0.267455766 | 0.267455766 | -5.0107557   |
| 1448149_at   | 0.0842072    | 11.49236894 | 1.17874971   | 0.267461335 | 0.267461335 | -5.010770017 |
| 1419187_at   | -0.090179551 | 4.383250224 | -1.178697736 | 0.267481055 | 0.267481055 | -5.010820703 |
| 1417575_at   | 0.092620984  | 7.363771626 | 1.178636943  | 0.267504121 | 0.267504121 | -5.010879987 |
| 1419023_x_at | -0.095055651 | 12.29576295 | -1.17854107  | 0.267540501 | 0.267540501 | -5.010973476 |
| 1458768_at   | 0.113796238  | 7.057973102 | 1.178537672  | 0.267541791 | 0.267541791 | -5.01097679  |
| 1431672_at   | -0.112301794 | 3.864321881 | -1.178499031 | 0.267556455 | 0.267556455 | -5.011014468 |
| 1438844_x_at | 0.104333282  | 5.747391052 | 1.178464081  | 0.267569719 | 0.267569719 | -5.011048546 |
| 1416677_at   | -0.151992338 | 5.408305314 | -1.178335186 | 0.26761864  | 0.26761864  | -5.011174222 |
| 1415982_at   | -0.095750743 | 7.826268247 | -1.178197495 | 0.267670907 | 0.267670907 | -5.011308463 |
| 1431442_at   | -0.101014028 | 4.120872737 | -1.178177122 | 0.267678642 | 0.267678642 | -5.011328324 |
| 1435686_at   | 0.095648715  | 6.499686013 | 1.178150265  | 0.267688838 | 0.267688838 | -5.011354507 |
| 1431691_a_at | 0.082933428  | 7.202054632 | 1.178067526  | 0.267720251 | 0.267720251 | -5.011435165 |
| 1418679_at   | -0.102463759 | 3.389928968 | -1.177985928 | 0.267751234 | 0.267751234 | -5.011514707 |
| 1418643_at   | 0.12972528   | 9.899250852 | 1.177959864  | 0.267761132 | 0.267761132 | -5.011540113 |
| 1421290_at   | -0.108527621 | 5.177289072 | -1.177932699 | 0.267771447 | 0.267771447 | -5.011566592 |
| 1450723_at   | 0.208853441  | 7.543534418 | 1.177907655  | 0.267780958 | 0.267780958 | -5.011591004 |
| 1433701_at   | 0.127711024  | 6.594218859 | 1.177880735  | 0.267791181 | 0.267791181 | -5.011617244 |
| 1455638_at   | 0.086575834  | 6.816898439 | 1.177841269  | 0.267806169 | 0.267806169 | -5.011655712 |
| 1423443_at   | -0.07892988  | 5.125143107 | -1.177776366 | 0.267830819 | 0.267830819 | -5.011718971 |
| 1449734_s_at | 0.09077481   | 7.448960253 | 1.177771113  | 0.267832814 | 0.267832814 | -5.011724091 |

|              |              |             |              |             |             |              |
|--------------|--------------|-------------|--------------|-------------|-------------|--------------|
| 1418791_at   | 0.160349762  | 6.424967501 | 1.177729202  | 0.267848733 | 0.267848733 | -5.011764939 |
| 1456144_at   | -0.078086641 | 8.342128604 | -1.177682242 | 0.267866571 | 0.267866571 | -5.011810707 |
| 1451370_at   | -0.079406274 | 8.072547187 | -1.177515708 | 0.267929835 | 0.267929835 | -5.011973003 |
| 1439152_at   | 0.082101345  | 7.10991685  | 1.177367085  | 0.267986305 | 0.267986305 | -5.01211783  |
| 1444735_at   | -0.159794097 | 5.537134396 | -1.177227061 | 0.268039517 | 0.268039517 | -5.012254267 |
| 1450928_at   | 0.103516594  | 9.106622223 | 1.177225972  | 0.268039931 | 0.268039931 | -5.012255328 |
| 1427866_x_at | 0.290833885  | 6.000580922 | 1.177196563  | 0.268051108 | 0.268051108 | -5.012283981 |
| 1426023_a_at | 0.08390196   | 6.760909511 | 1.177154227  | 0.268067199 | 0.268067199 | -5.01232523  |
| 1423428_at   | 0.104144362  | 7.778962121 | 1.177063045  | 0.268101857 | 0.268101857 | -5.012414065 |
| 1456284_at   | -0.093407448 | 6.651346441 | -1.176957861 | 0.268141842 | 0.268141842 | -5.012516536 |
| 1429846_at   | -0.600496632 | 5.42531121  | -1.17686115  | 0.26817861  | 0.26817861  | -5.012610747 |
| 1439355_at   | 0.100740829  | 5.816054642 | 1.176821801  | 0.268193571 | 0.268193571 | -5.012649078 |
| 1416354_at   | 0.070812846  | 10.07349507 | 1.176814408  | 0.268196382 | 0.268196382 | -5.012656279 |
| 1432213_at   | -0.111112778 | 3.94197417  | -1.176681248 | 0.268247017 | 0.268247017 | -5.012785984 |
| 1434620_s_at | 0.088706492  | 9.65384483  | 1.176632227  | 0.268265659 | 0.268265659 | -5.012833731 |
| 1425731_at   | 0.092959068  | 7.786554646 | 1.176557691  | 0.268294007 | 0.268294007 | -5.012906326 |
| 1427856_a_at | 0.089489408  | 3.443935421 | 1.176524819  | 0.26830651  | 0.26830651  | -5.012938341 |
| 1429291_at   | 0.07126421   | 10.50237483 | 1.17648329   | 0.268322306 | 0.268322306 | -5.012978787 |
| 1418832_at   | 0.112689651  | 6.040399693 | 1.176401478  | 0.268353426 | 0.268353426 | -5.013058462 |
| 1428636_at   | -0.090662085 | 6.878815947 | -1.176388665 | 0.268358301 | 0.268358301 | -5.01307094  |
| 1451928_a_at | 0.082648149  | 6.326850457 | 1.17637098   | 0.268365028 | 0.268365028 | -5.013088162 |
| 1452625_at   | 0.092480071  | 8.660654052 | 1.176235019  | 0.268416754 | 0.268416754 | -5.01322056  |
| 1427326_at   | -0.088613087 | 7.184641625 | -1.176194799 | 0.268432057 | 0.268432057 | -5.013259724 |
| 1454354_at   | 0.098142725  | 3.716335762 | 1.176116654  | 0.268461792 | 0.268461792 | -5.013335815 |
| 1436253_at   | 0.092170782  | 5.544441684 | 1.176091791  | 0.268471254 | 0.268471254 | -5.013360024 |
| 1429590_at   | -0.12483404  | 8.583257727 | -1.176087729 | 0.268472799 | 0.268472799 | -5.013363979 |
| 1415822_at   | 0.087189689  | 12.27896936 | 1.175990408  | 0.268509836 | 0.268509836 | -5.013458735 |
| 1423143_at   | 0.14005451   | 8.449735495 | 1.175912771  | 0.268539384 | 0.268539384 | -5.01353432  |
| 1423232_at   | 0.146412147  | 6.614924715 | 1.175828043  | 0.268571635 | 0.268571635 | -5.013616807 |
| 1443833_at   | 0.170043719  | 4.77751783  | 1.175778838  | 0.268590365 | 0.268590365 | -5.013664708 |
| 1447803_x_at | 0.094109918  | 3.915974254 | 1.175734629  | 0.268607195 | 0.268607195 | -5.013707745 |
| 1449431_at   | -0.102675043 | 3.339536875 | -1.175690511 | 0.268623991 | 0.268623991 | -5.013750691 |
| 1451413_at   | 0.106372783  | 8.586219615 | 1.17545163   | 0.268714948 | 0.268714948 | -5.01398321  |
| 1435348_at   | -0.203376446 | 8.460776284 | -1.175419652 | 0.268727126 | 0.268727126 | -5.014014334 |
| 1445000_at   | 0.129254264  | 3.952903011 | 1.175387874  | 0.268739228 | 0.268739228 | -5.014045262 |
| 1416102_at   | -0.090597267 | 10.07442378 | -1.175291833 | 0.268775807 | 0.268775807 | -5.014138732 |
| 1432252_a_at | -0.089773459 | 4.215137799 | -1.175232608 | 0.268798365 | 0.268798365 | -5.014196369 |
| 1444438_at   | -0.10679915  | 4.203404689 | -1.175210853 | 0.268806652 | 0.268806652 | -5.01421754  |
| 1441226_at   | -0.10263796  | 4.547075432 | -1.175203605 | 0.268809413 | 0.268809413 | -5.014224594 |
| 1422709_a_at | 0.086021649  | 6.760245949 | 1.175163196  | 0.268824806 | 0.268824806 | -5.014263917 |
| 1432013_a_at | -0.103304653 | 6.591095542 | -1.175147778 | 0.26883068  | 0.26883068  | -5.014278921 |
| 1417931_at   | 0.082030243  | 8.200572287 | 1.175097743  | 0.268849741 | 0.268849741 | -5.01432761  |
| 1418173_at   | -0.084555978 | 3.227569181 | -1.175001905 | 0.268886254 | 0.268886254 | -5.014420866 |
| 1457621_at   | 0.121306834  | 4.101588302 | 1.174917589  | 0.268918381 | 0.268918381 | -5.014502907 |
| 1452302_at   | 0.102291076  | 7.69521193  | 1.174835653  | 0.268949603 | 0.268949603 | -5.014582626 |
| 1422448_at   | -0.112047046 | 4.615919237 | -1.174824016 | 0.268954038 | 0.268954038 | -5.014593949 |
| 1417623_at   | 0.220021154  | 9.160041043 | 1.174803342  | 0.268961917 | 0.268961917 | -5.014614063 |
| 1455424_at   | -0.094871392 | 3.444195661 | -1.174799029 | 0.268963561 | 0.268963561 | -5.01461826  |
| 1418410_at   | 0.088670936  | 6.672964629 | 1.174779055  | 0.268971173 | 0.268971173 | -5.014637692 |
| 1430680_a_at | 0.194934882  | 7.394157806 | 1.174679342  | 0.269009176 | 0.269009176 | -5.0147347   |
| 1440098_at   | -0.148051293 | 4.423623679 | -1.174675242 | 0.269010739 | 0.269010739 | -5.014738689 |
| 1449982_at   | 0.07476223   | 4.64579985  | 1.17463488   | 0.269026123 | 0.269026123 | -5.014777954 |
| 1431872_at   | -0.083792515 | 3.848605851 | -1.174579039 | 0.269047409 | 0.269047409 | -5.014832277 |

|              |              |             |              |             |             |              |
|--------------|--------------|-------------|--------------|-------------|-------------|--------------|
| 1427938_at   | -0.114179656 | 9.34385     | -1.174320931 | 0.269145812 | 0.269145812 | -5.01508334  |
| 1447033_at   | -0.12038519  | 3.360748183 | -1.174293591 | 0.269156237 | 0.269156237 | -5.015109932 |
| 1458189_at   | 0.0976213    | 5.259549005 | 1.174224337  | 0.269182645 | 0.269182645 | -5.015177288 |
| 1444411_at   | -0.078665036 | 5.702087139 | -1.174111096 | 0.269225832 | 0.269225832 | -5.01528742  |
| 1436216_s_at | -0.120827931 | 7.77227041  | -1.173993002 | 0.269270876 | 0.269270876 | -5.015402264 |
| 1433587_at   | -0.121170818 | 6.148680546 | -1.173972775 | 0.269278591 | 0.269278591 | -5.015421933 |
| 1446428_at   | 0.105518323  | 6.419311551 | 1.173894592  | 0.269308416 | 0.269308416 | -5.015497958 |
| 1430523_s_at | -0.091444427 | 3.8728627   | -1.173876208 | 0.269315429 | 0.269315429 | -5.015515835 |
| 1424402_at   | 0.14715058   | 8.097318565 | 1.173827316  | 0.269334082 | 0.269334082 | -5.015563375 |
| 1426361_at   | 0.090588544  | 10.32710299 | 1.173755493  | 0.269361485 | 0.269361485 | -5.015633211 |
| 1420047_at   | -0.090462886 | 4.276067811 | -1.173723494 | 0.269373694 | 0.269373694 | -5.015664323 |
| 1437718_x_at | -0.109069313 | 6.949010006 | -1.173608171 | 0.2694177   | 0.2694177   | -5.015776446 |
| 1433057_at   | -0.097904751 | 3.995595154 | -1.173596529 | 0.269422143 | 0.269422143 | -5.015787765 |
| 1432228_at   | -0.095671192 | 4.42036744  | -1.173569377 | 0.269432504 | 0.269432504 | -5.015814161 |
| 1449039_a_at | 0.074468736  | 10.7834548  | 1.173538906  | 0.269444133 | 0.269444133 | -5.015843785 |
| 1455925_at   | 0.08631981   | 4.348333281 | 1.1734445    | 0.269480164 | 0.269480164 | -5.015935561 |
| 1418761_at   | 0.096527255  | 8.554284129 | 1.173340771  | 0.269519758 | 0.269519758 | -5.016036395 |
| 1437264_at   | -0.127048895 | 4.275978025 | -1.173311819 | 0.26953081  | 0.26953081  | -5.016064538 |
| 1438349_at   | 0.177040796  | 5.835186059 | 1.173309129  | 0.269531837 | 0.269531837 | -5.016067153 |
| 1449278_at   | 0.074669099  | 8.947198677 | 1.173301437  | 0.269534773 | 0.269534773 | -5.01607463  |
| 1429709_at   | -0.087401598 | 10.01989249 | -1.173297152 | 0.269536409 | 0.269536409 | -5.016078795 |
| 1427784_at   | -0.136837145 | 3.674198187 | -1.173210973 | 0.269569309 | 0.269569309 | -5.016162561 |
| 1420608_at   | 0.097469771  | 8.835478318 | 1.173196449  | 0.269574854 | 0.269574854 | -5.016176678 |
| 1436378_at   | 0.081463489  | 6.530195763 | 1.173178873  | 0.269581565 | 0.269581565 | -5.016193762 |
| 1454067_a_at | 0.09601403   | 8.180898109 | 1.173163968  | 0.269587255 | 0.269587255 | -5.016208249 |
| 1452974_at   | 0.1032959    | 6.140794104 | 1.173001887  | 0.269649144 | 0.269649144 | -5.016365777 |
| 1453139_at   | -0.130839957 | 4.932657322 | -1.17299905  | 0.269650228 | 0.269650228 | -5.016368534 |
| 1445718_at   | -0.111617739 | 7.321178662 | -1.172986254 | 0.269655114 | 0.269655114 | -5.01638097  |
| 1445702_x_at | 0.12965768   | 3.611447673 | 1.172983496  | 0.269656167 | 0.269656167 | -5.01638365  |
| 1419874_x_at | 0.074371031  | 4.686769103 | 1.172951363  | 0.269668439 | 0.269668439 | -5.016414879 |
| 1420494_x_at | -0.255253269 | 11.50951514 | -1.172904206 | 0.269686448 | 0.269686448 | -5.016460706 |
| 1415839_a_at | 0.07901454   | 12.83914192 | 1.172897232  | 0.269689112 | 0.269689112 | -5.016467483 |
| 1421316_at   | -0.079923516 | 3.493739933 | -1.172877315 | 0.269696718 | 0.269696718 | -5.016486839 |
| 1445533_at   | -0.129816828 | 4.705783257 | -1.172860217 | 0.269703249 | 0.269703249 | -5.016503454 |
| 1451447_at   | 0.14514271   | 7.778055225 | 1.172810783  | 0.26972213  | 0.26972213  | -5.016551492 |
| 1422113_at   | -0.111266429 | 5.221454775 | -1.172803751 | 0.269724816 | 0.269724816 | -5.016558325 |
| 1426887_at   | 0.114821849  | 6.545340518 | 1.172797082  | 0.269727363 | 0.269727363 | -5.016564806 |
| 1454687_at   | 0.152235177  | 6.646256823 | 1.172751037  | 0.269744951 | 0.269744951 | -5.016609549 |
| 1431078_at   | -0.083244163 | 5.002979165 | -1.172554907 | 0.269819877 | 0.269819877 | -5.01680012  |
| 1444069_at   | -0.096743422 | 6.901446628 | -1.172544534 | 0.269823841 | 0.269823841 | -5.016810199 |
| 1437056_x_at | 0.178105333  | 9.342664774 | 1.172506091  | 0.269838529 | 0.269838529 | -5.016847549 |
| 1450404_at   | -0.086463949 | 3.377459842 | -1.172383191 | 0.269885491 | 0.269885491 | -5.01696695  |
| 1425705_a_at | 0.100794266  | 4.592266184 | 1.172361375  | 0.269893828 | 0.269893828 | -5.016988144 |
| 1421213_at   | -0.121499841 | 6.475282921 | -1.172220416 | 0.269947699 | 0.269947699 | -5.017125077 |
| 1458122_at   | 0.083116423  | 3.774364602 | 1.17221927   | 0.269948138 | 0.269948138 | -5.01712619  |
| 1459246_at   | -0.103513343 | 4.151854899 | -1.172145055 | 0.269976505 | 0.269976505 | -5.017198282 |
| 1454987_a_at | -0.080127997 | 7.262594098 | -1.172118372 | 0.269986704 | 0.269986704 | -5.0172242   |
| 1439385_x_at | -0.109001754 | 3.568435189 | -1.172042295 | 0.270015786 | 0.270015786 | -5.017298095 |
| 1448813_at   | -0.096816733 | 3.836149099 | -1.172006225 | 0.270029576 | 0.270029576 | -5.01733313  |
| 1435755_at   | 0.095080936  | 8.430889492 | 1.171969047  | 0.270043789 | 0.270043789 | -5.017369239 |
| 1446070_at   | 0.091642092  | 6.401380948 | 1.171836386  | 0.270094512 | 0.270094512 | -5.017498081 |
| 1424826_s_at | -0.083279991 | 8.461090028 | -1.171742663 | 0.270130352 | 0.270130352 | -5.0175891   |
| 1439798_at   | -0.074747109 | 3.463584836 | -1.171640911 | 0.270169266 | 0.270169266 | -5.01768791  |

|              |              |             |              |             |             |              |
|--------------|--------------|-------------|--------------|-------------|-------------|--------------|
| 1456178_at   | -0.083153709 | 5.339882391 | -1.171640476 | 0.270169432 | 0.270169432 | -5.017688333 |
| 1422487_at   | 0.094732206  | 10.95422135 | 1.171640291  | 0.270169503 | 0.270169503 | -5.017688512 |
| 1423452_at   | -0.087602205 | 8.4944134   | -1.171610694 | 0.270180823 | 0.270180823 | -5.017717253 |
| 1430394_a_at | -0.12945999  | 3.853913519 | -1.171448582 | 0.270242832 | 0.270242832 | -5.017874662 |
| 1419765_at   | 0.092652493  | 5.781036853 | 1.171383062  | 0.270267898 | 0.270267898 | -5.017938278 |
| 1457499_at   | 0.097788172  | 4.61595437  | 1.17136537   | 0.270274666 | 0.270274666 | -5.017955455 |
| 1427201_at   | -0.175787818 | 5.699933934 | -1.171340586 | 0.270284148 | 0.270284148 | -5.017979518 |
| 1432644_at   | 0.08968855   | 4.012486947 | 1.171192343  | 0.27034087  | 0.27034087  | -5.018123437 |
| 1445433_at   | -0.107678939 | 3.673804347 | -1.171161703 | 0.270352595 | 0.270352595 | -5.018153183 |
| 1457796_at   | -0.111603978 | 3.868875637 | -1.17111726  | 0.270369602 | 0.270369602 | -5.018196326 |
| 1416513_at   | -0.133405256 | 8.157783498 | -1.171062086 | 0.270390717 | 0.270390717 | -5.018249886 |
| 1420272_at   | -0.087506969 | 7.413936964 | -1.171048764 | 0.270395816 | 0.270395816 | -5.018262818 |
| 1452431_s_at | -0.110592324 | 5.500330789 | -1.171035202 | 0.270401006 | 0.270401006 | -5.018275983 |
| 1420212_at   | 0.101657795  | 3.217535193 | 1.170953911  | 0.270432119 | 0.270432119 | -5.01835489  |
| 1423980_at   | -0.098632703 | 5.83973868  | -1.170907851 | 0.27044975  | 0.27044975  | -5.018399598 |
| 1445278_at   | -0.097064044 | 6.091783398 | -1.170883124 | 0.270459215 | 0.270459215 | -5.018423598 |
| 1456732_at   | -0.15442546  | 3.4244142   | -1.170807818 | 0.270488043 | 0.270488043 | -5.01849669  |
| 1430885_at   | 0.089647417  | 6.503980385 | 1.170686301  | 0.270534565 | 0.270534565 | -5.018614626 |
| 1421921_at   | 0.082246209  | 3.817433983 | 1.170598843  | 0.270568052 | 0.270568052 | -5.018699501 |
| 1424150_at   | 0.096277715  | 7.553732883 | 1.170528019  | 0.270595173 | 0.270595173 | -5.018768232 |
| 1422564_at   | -0.139258695 | 4.390489996 | -1.170496959 | 0.270607067 | 0.270607067 | -5.018798372 |
| 1449568_at   | -0.137305072 | 4.312505202 | -1.170496247 | 0.27060734  | 0.27060734  | -5.018799063 |
| 1424241_at   | -0.092359698 | 8.793782101 | -1.170496135 | 0.270607383 | 0.270607383 | -5.018799171 |
| 1452469_a_at | 0.09857452   | 7.596008795 | 1.170491039  | 0.270609334 | 0.270609334 | -5.018804116 |
| 1454656_at   | -0.143274128 | 6.745545281 | -1.170475896 | 0.270615134 | 0.270615134 | -5.018818811 |
| 1440745_at   | 0.133237873  | 5.320359448 | 1.170474907  | 0.270615513 | 0.270615513 | -5.01881977  |
| 1450313_at   | -0.091493955 | 5.663941973 | -1.170355164 | 0.270661373 | 0.270661373 | -5.018935962 |
| 1420150_at   | 0.127232138  | 7.679676134 | 1.170295781  | 0.270684119 | 0.270684119 | -5.01899358  |
| 1422204_at   | 0.078276575  | 4.358128437 | 1.170271185  | 0.27069354  | 0.27069354  | -5.019017445 |
| 1427539_a_at | 0.117747913  | 8.816410788 | 1.17019091   | 0.270724292 | 0.270724292 | -5.01909533  |
| 1445273_at   | 0.128905305  | 7.206731695 | 1.170139749  | 0.270743891 | 0.270743891 | -5.019144966 |
| 1445909_at   | -0.089996011 | 3.720629684 | -1.170004165 | 0.270795839 | 0.270795839 | -5.019276501 |
| 1429519_at   | 0.103613898  | 6.950682393 | 1.169997347  | 0.270798452 | 0.270798452 | -5.019283116 |
| 1421801_at   | -0.089804065 | 7.024233867 | -1.169983348 | 0.270803816 | 0.270803816 | -5.019296696 |
| 1445085_at   | 0.083689014  | 3.675659475 | 1.169967234  | 0.27080999  | 0.27080999  | -5.019312328 |
| 1443854_at   | -0.16743299  | 4.246790794 | -1.169948748 | 0.270817074 | 0.270817074 | -5.01933026  |
| 1419466_at   | 0.116827496  | 7.164807286 | 1.169847177  | 0.270855998 | 0.270855998 | -5.019428788 |
| 1454644_at   | 0.09323563   | 8.98749533  | 1.169771002  | 0.270885192 | 0.270885192 | -5.019502677 |
| 1419681_a_at | 0.120555359  | 3.911508327 | 1.169759288  | 0.270889682 | 0.270889682 | -5.019514038 |
| 1429879_at   | -0.079392691 | 7.558955586 | -1.169732514 | 0.270899944 | 0.270899944 | -5.019540008 |
| 1420878_a_at | 0.126392848  | 9.516483212 | 1.169706997  | 0.270909725 | 0.270909725 | -5.019564758 |
| 1422355_at   | -0.115235635 | 4.290988493 | -1.16965617  | 0.270929207 | 0.270929207 | -5.019614055 |
| 1425724_at   | 0.094156688  | 4.608419045 | 1.169462914  | 0.271003294 | 0.271003294 | -5.019801481 |
| 1420771_at   | -0.141756614 | 4.87061015  | -1.169457214 | 0.27100548  | 0.27100548  | -5.019807009 |
| 1446541_at   | -0.122213002 | 4.504876523 | -1.169419808 | 0.271019822 | 0.271019822 | -5.019843284 |
| 1435599_at   | -0.090457002 | 3.634166327 | -1.169412837 | 0.271022494 | 0.271022494 | -5.019850044 |
| 1451485_at   | 0.18101145   | 10.28908052 | 1.169397879  | 0.27102823  | 0.27102823  | -5.019864549 |
| 1448422_at   | -0.082592085 | 9.743327177 | -1.16935303  | 0.271045427 | 0.271045427 | -5.019908041 |
| 1420131_s_at | 0.100257972  | 9.942908308 | 1.169254273  | 0.271083298 | 0.271083298 | -5.020003805 |
| 1452160_at   | 0.170788848  | 8.412740157 | 1.169213307  | 0.271099008 | 0.271099008 | -5.020043527 |
| 1456289_at   | -0.085072587 | 4.847832959 | -1.16901939  | 0.271173386 | 0.271173386 | -5.020231544 |
| 1455754_at   | -0.096278516 | 3.931608917 | -1.169015385 | 0.271174923 | 0.271174923 | -5.020235427 |
| 1438275_at   | 0.118981714  | 4.782090433 | 1.168871877  | 0.271229977 | 0.271229977 | -5.020374554 |

|                |              |             |              |             |             |              |
|----------------|--------------|-------------|--------------|-------------|-------------|--------------|
| 1447235_at     | 0.128905843  | 3.846916145 | 1.168797263  | 0.271258604 | 0.271258604 | -5.020446885 |
| 1427744_at     | -0.080336001 | 3.321803729 | -1.168784417 | 0.271263533 | 0.271263533 | -5.020459338 |
| 1457555_at     | -0.074869792 | 3.848821685 | -1.168764221 | 0.271271282 | 0.271271282 | -5.020478916 |
| 1418166_at     | -0.092083628 | 4.585842142 | -1.168743189 | 0.271279353 | 0.271279353 | -5.020499303 |
| 1416486_at     | 0.077797772  | 10.07471199 | 1.168733046  | 0.271283245 | 0.271283245 | -5.020509135 |
| 1439764_s_at   | 0.1103295    | 9.917755903 | 1.168729682  | 0.271284536 | 0.271284536 | -5.020512396 |
| 1426799_at     | 0.079934599  | 9.54624276  | 1.168728221  | 0.271285096 | 0.271285096 | -5.020513812 |
| 1456549_at     | -0.09518279  | 4.35930407  | -1.168698802 | 0.271296385 | 0.271296385 | -5.020542329 |
| 1456285_at     | -0.098766812 | 3.758317416 | -1.168689007 | 0.271300144 | 0.271300144 | -5.020551823 |
| 1456642_x_at   | 0.100932077  | 10.45848329 | 1.168408254  | 0.271407897 | 0.271407897 | -5.020823941 |
| 1417312_at     | -0.087954696 | 8.849820189 | -1.168340896 | 0.271433754 | 0.271433754 | -5.02088922  |
| 1423326_at     | 0.122894273  | 6.790429229 | 1.168327897  | 0.271438745 | 0.271438745 | -5.020901818 |
| 1447172_at     | 0.103037836  | 3.971207368 | 1.168305421  | 0.271447373 | 0.271447373 | -5.020923599 |
| 1447658_x_at   | -0.240359628 | 6.950511448 | -1.168282136 | 0.271456313 | 0.271456313 | -5.020946164 |
| 1450704_at     | -0.167729317 | 6.057456425 | -1.168225277 | 0.271478143 | 0.271478143 | -5.021001265 |
| 1424438_a_at   | 0.073446206  | 9.238856877 | 1.168215909  | 0.271481739 | 0.271481739 | -5.021010342 |
| 1443151_at     | -0.101189606 | 6.366357042 | -1.168200471 | 0.271487666 | 0.271487666 | -5.021025302 |
| 1424080_at     | 0.082408341  | 8.26236513  | 1.168163797  | 0.271501748 | 0.271501748 | -5.02106084  |
| 1425282_at     | -0.094602125 | 4.804342074 | -1.168149703 | 0.27150716  | 0.27150716  | -5.021074498 |
| 1415757_at     | -0.194454198 | 8.861576655 | -1.168117054 | 0.271519696 | 0.271519696 | -5.021106135 |
| 1459078_at     | 0.12581715   | 4.965081732 | 1.168078054  | 0.271534672 | 0.271534672 | -5.021143925 |
| 1456280_at     | -0.072417972 | 8.171165457 | -1.168052519 | 0.271544478 | 0.271544478 | -5.021168666 |
| 1417709_at     | -0.077190598 | 6.182368718 | -1.168008472 | 0.271561393 | 0.271561393 | -5.021211345 |
| 1424257_at     | 0.117352688  | 6.023138487 | 1.167974187  | 0.27157456  | 0.27157456  | -5.021244565 |
| 1430935_at     | -0.101445538 | 4.021876309 | -1.167936698 | 0.271588958 | 0.271588958 | -5.021280888 |
| 1438176_x_at   | 0.101277243  | 11.28877879 | 1.167927029  | 0.271592671 | 0.271592671 | -5.021290255 |
| 1425932_a_at   | 0.113806689  | 7.05344249  | 1.1678884    | 0.271607508 | 0.271607508 | -5.021327681 |
| 1431156_at     | 0.097260045  | 4.917156575 | 1.167792145  | 0.27164448  | 0.27164448  | -5.021420936 |
| 1422704_at     | 0.123761377  | 7.580161574 | 1.167564801  | 0.271731821 | 0.271731821 | -5.021641169 |
| 1423096_at     | 0.087039507  | 9.85623414  | 1.167507367  | 0.271753889 | 0.271753889 | -5.021696803 |
| 1417534_at     | -0.096571033 | 10.17028468 | -1.167500024 | 0.271756711 | 0.271756711 | -5.021703916 |
| 1455397_at     | -0.076388084 | 5.622503986 | -1.167369847 | 0.271806736 | 0.271806736 | -5.021830003 |
| 1443707_at     | -0.091800977 | 5.947268285 | -1.167355478 | 0.271812258 | 0.271812258 | -5.021843919 |
| 1425991_a_at   | 0.13120432   | 8.406012841 | 1.167331712  | 0.271821392 | 0.271821392 | -5.021866938 |
| 1454040_at     | 0.103323501  | 4.40711067  | 1.167231918  | 0.271859748 | 0.271859748 | -5.021963587 |
| 1455918_at     | 0.100835173  | 3.796476937 | 1.167185156  | 0.271877722 | 0.271877722 | -5.022008875 |
| 1430938_at     | -0.074382444 | 4.630417555 | -1.167119562 | 0.271902937 | 0.271902937 | -5.022072396 |
| 1422594_at     | 0.075433018  | 9.209942365 | 1.167112627  | 0.271905603 | 0.271905603 | -5.022079112 |
| 1456874_at     | 0.149172136  | 8.313852137 | 1.167032116  | 0.271936555 | 0.271936555 | -5.022157077 |
| 1423242_at     | 0.077345227  | 8.520947687 | 1.166966827  | 0.271961657 | 0.271961657 | -5.022220298 |
| 1422551_at     | 0.092774229  | 8.922329525 | 1.166889647  | 0.271991332 | 0.271991332 | -5.02229503  |
| AFFX-BioC-3_at | 0.095776374  | 9.373609063 | 1.166789648  | 0.272029786 | 0.272029786 | -5.022391852 |
| 1436838_x_at   | 0.096204721  | 10.0342575  | 1.166672334  | 0.272074904 | 0.272074904 | -5.022505431 |
| 1455337_at     | 0.124882006  | 4.621348558 | 1.166618018  | 0.272095795 | 0.272095795 | -5.022558016 |
| 1417406_at     | 0.093566264  | 8.19150528  | 1.166406121  | 0.272177309 | 0.272177309 | -5.02276314  |
| 1448706_at     | -0.086383935 | 9.521716797 | -1.166321576 | 0.272209837 | 0.272209837 | -5.022844976 |
| 1442418_at     | -0.120761831 | 6.281898754 | -1.166308675 | 0.272214801 | 0.272214801 | -5.022857464 |
| 1459918_at     | 0.098358199  | 4.632756056 | 1.166217789  | 0.272249773 | 0.272249773 | -5.022945431 |
| 1432746_at     | -0.109072059 | 4.947309097 | -1.166184535 | 0.27226257  | 0.27226257  | -5.022977616 |
| 1433612_at     | 0.094389183  | 10.14416437 | 1.16615179   | 0.272275171 | 0.272275171 | -5.023009308 |
| 1449950_at     | 0.116530187  | 5.578663381 | 1.166100758  | 0.272294811 | 0.272294811 | -5.023058697 |
| 1439837_at     | 0.134217324  | 7.140299356 | 1.166085653  | 0.272300625 | 0.272300625 | -5.023073316 |
| 1421110_at     | 0.120610338  | 3.761947664 | 1.166050236  | 0.272314256 | 0.272314256 | -5.023107591 |

|              |              |             |              |             |             |              |
|--------------|--------------|-------------|--------------|-------------|-------------|--------------|
| 1419252_at   | 0.098804094  | 9.843654306 | 1.165990521  | 0.27233724  | 0.27233724  | -5.02316538  |
| 1457965_at   | 0.079379191  | 3.21881222  | 1.165986901  | 0.272338633 | 0.272338633 | -5.023168883 |
| 1457439_at   | -0.083282737 | 3.486829952 | -1.165933688 | 0.272359116 | 0.272359116 | -5.023220379 |
| 1441953_at   | -0.14240893  | 6.498742897 | -1.165909447 | 0.272368447 | 0.272368447 | -5.023243836 |
| 1458706_at   | 0.126647891  | 6.273284075 | 1.165863202  | 0.27238625  | 0.27238625  | -5.023288586 |
| 1425423_at   | 0.125060835  | 6.844128038 | 1.165814976  | 0.272404815 | 0.272404815 | -5.023335251 |
| 1444892_at   | 0.157210842  | 4.122247606 | 1.165806369  | 0.272408129 | 0.272408129 | -5.02334358  |
| 1432415_at   | -0.076377092 | 3.805165568 | -1.165729665 | 0.272437661 | 0.272437661 | -5.023417799 |
| 1438835_a_at | 0.097505529  | 10.71465682 | 1.165721817  | 0.272440682 | 0.272440682 | -5.023425392 |
| 1438797_at   | -0.081620617 | 3.806113761 | -1.16571946  | 0.27244159  | 0.27244159  | -5.023427673 |
| 1447360_at   | -0.849991372 | 6.419047878 | -1.16562056  | 0.272479671 | 0.272479671 | -5.023523363 |
| 1421369_a_at | 0.084374411  | 8.578134604 | 1.165611867  | 0.272483019 | 0.272483019 | -5.023531773 |
| 1449909_at   | 0.084745582  | 4.141542901 | 1.165607269  | 0.272484789 | 0.272484789 | -5.023536222 |
| 1429562_at   | -0.123844364 | 3.598184344 | -1.165508564 | 0.2725228   | 0.2725228   | -5.023631716 |
| 1455961_at   | 0.12712928   | 10.68908045 | 1.165451698  | 0.272544701 | 0.272544701 | -5.02368673  |
| 1426696_at   | -0.083701002 | 9.378082543 | -1.16532793  | 0.272592373 | 0.272592373 | -5.02380646  |
| 1456918_at   | 0.107844194  | 6.367322116 | 1.165208781  | 0.272638272 | 0.272638272 | -5.023921714 |
| 1436841_at   | -0.08336145  | 8.49416504  | -1.165101096 | 0.27267976  | 0.27267976  | -5.024025871 |
| 1448377_at   | -0.081819454 | 5.885652811 | -1.165086964 | 0.272685205 | 0.272685205 | -5.024039539 |
| 1458651_at   | -0.090202951 | 4.310842748 | -1.165084337 | 0.272686217 | 0.272686217 | -5.02404208  |
| 1426831_at   | -0.105314702 | 9.915832063 | -1.165080146 | 0.272687832 | 0.272687832 | -5.024046134 |
| 1437074_at   | 0.176436937  | 7.440476219 | 1.164991644  | 0.272721934 | 0.272721934 | -5.02413173  |
| 1419940_at   | 0.07418319   | 6.270620553 | 1.164969623  | 0.27273042  | 0.27273042  | -5.024153027 |
| 1438936_s_at | -0.117590488 | 6.091629615 | -1.164954601 | 0.272736209 | 0.272736209 | -5.024167556 |
| 1433131_at   | -0.074852317 | 4.21325618  | -1.164849315 | 0.272776784 | 0.272776784 | -5.024269376 |
| 1458145_at   | 0.102998338  | 7.266451358 | 1.164791701  | 0.27279899  | 0.27279899  | -5.024325091 |
| 1453081_at   | 0.09361368   | 6.830079852 | 1.164708802  | 0.272830943 | 0.272830943 | -5.024405254 |
| 1452878_at   | 0.10018568   | 7.813053679 | 1.164676686  | 0.272843323 | 0.272843323 | -5.024436309 |
| 1441786_at   | 0.090365008  | 7.064518306 | 1.164651991  | 0.272852842 | 0.272852842 | -5.024460188 |
| 1446190_at   | -0.137396894 | 6.606957403 | -1.164442271 | 0.272933697 | 0.272933697 | -5.024662961 |
| 1428203_at   | 0.171842142  | 5.104309034 | 1.16437719   | 0.272958792 | 0.272958792 | -5.024725882 |
| 1449956_at   | 0.095042949  | 5.522339626 | 1.164275174  | 0.272998133 | 0.272998133 | -5.024824505 |
| 1434629_at   | 0.101367726  | 7.846622891 | 1.16426054   | 0.273003777 | 0.273003777 | -5.024838652 |
| 1430201_at   | 0.083126065  | 4.409903038 | 1.164046253  | 0.273086429 | 0.273086429 | -5.025045792 |
| 1426076_at   | 0.141683479  | 6.563933423 | 1.16404084   | 0.273088517 | 0.273088517 | -5.025051024 |
| 1422259_a_at | 0.095225983  | 3.928529872 | 1.163997673  | 0.273105169 | 0.273105169 | -5.025092747 |
| 1434675_at   | 0.087634695  | 7.873431822 | 1.163912784  | 0.273137919 | 0.273137919 | -5.025174795 |
| 1440448_at   | -0.127108809 | 6.798327395 | -1.163748054 | 0.27320148  | 0.27320148  | -5.025333999 |
| 1420991_at   | -0.158695089 | 4.643913615 | -1.163698743 | 0.273220508 | 0.273220508 | -5.025381653 |
| 1453917_at   | -0.083095156 | 4.631612423 | -1.163670598 | 0.27323137  | 0.27323137  | -5.025408851 |
| 1427927_at   | 0.091705691  | 7.876415323 | 1.163669309  | 0.273231867 | 0.273231867 | -5.025410096 |
| 1436077_a_at | -0.125431833 | 5.712111782 | -1.163628769 | 0.273247513 | 0.273247513 | -5.025449272 |
| 1449676_at   | -0.090675474 | 4.662906865 | -1.163578591 | 0.273266879 | 0.273266879 | -5.02549776  |
| 1431803_at   | 0.092161342  | 4.828256439 | 1.163524857  | 0.273287618 | 0.273287618 | -5.025549683 |
| 1416382_at   | 0.201394571  | 9.633833663 | 1.16351782   | 0.273290335 | 0.273290335 | -5.025556483 |
| 1446097_at   | 0.112199934  | 3.945254079 | 1.163503657  | 0.273295801 | 0.273295801 | -5.025570168 |
| 1433036_at   | -0.087240661 | 4.307937663 | -1.163423979 | 0.273326557 | 0.273326557 | -5.025647155 |
| 1420138_at   | 0.07910878   | 8.24059381  | 1.163420259  | 0.273327993 | 0.273327993 | -5.02565075  |
| 1455709_at   | 0.077506866  | 4.39559534  | 1.163404744  | 0.273333983 | 0.273333983 | -5.025665741 |
| 1425983_x_at | -0.092933198 | 7.543130823 | -1.163301271 | 0.273373929 | 0.273373929 | -5.025765713 |
| 1442849_at   | 0.108001392  | 6.739407764 | 1.163092526  | 0.27345453  | 0.27345453  | -5.025967377 |
| 1459346_at   | -0.111528375 | 5.056441594 | -1.163085836 | 0.273457114 | 0.273457114 | -5.02597384  |
| 1428578_s_at | -0.087406686 | 6.278915357 | -1.163056957 | 0.273468266 | 0.273468266 | -5.026001738 |

|              |              |             |              |             |             |              |
|--------------|--------------|-------------|--------------|-------------|-------------|--------------|
| 1416741_at   | -0.132303556 | 9.094069286 | -1.162915388 | 0.273522942 | 0.273522942 | -5.026138486 |
| 1442923_at   | 0.126021543  | 3.285755401 | 1.162914188  | 0.273523406 | 0.273523406 | -5.026139646 |
| 1458899_at   | 0.151048516  | 4.748011858 | 1.162894381  | 0.273531056 | 0.273531056 | -5.026158777 |
| 1436472_at   | -0.132940315 | 7.459173072 | -1.162825208 | 0.273557775 | 0.273557775 | -5.026225589 |
| 1435340_at   | 0.171719823  | 8.655627055 | 1.162769517  | 0.273579289 | 0.273579289 | -5.026279378 |
| 1421760_at   | -0.096929893 | 4.840659487 | -1.162741699 | 0.273590035 | 0.273590035 | -5.026306246 |
| 1432095_at   | -0.083585262 | 4.030889582 | -1.162701125 | 0.27360571  | 0.27360571  | -5.026345432 |
| 1451733_at   | 0.102908525  | 4.083972165 | 1.162650559  | 0.273625246 | 0.273625246 | -5.026394267 |
| 1460237_at   | -0.151822692 | 6.115398927 | -1.16240209  | 0.273721258 | 0.273721258 | -5.026634209 |
| 1437751_at   | -0.158912121 | 4.571377633 | -1.16234836  | 0.273742024 | 0.273742024 | -5.02668609  |
| 1444996_at   | 0.120025996  | 5.087490121 | 1.162259796  | 0.273776255 | 0.273776255 | -5.026771603 |
| 1450233_a_at | -0.080746823 | 4.279612149 | -1.16207907  | 0.273846118 | 0.273846118 | -5.026946089 |
| 1416538_at   | -0.124351678 | 6.611908807 | -1.162006505 | 0.273874173 | 0.273874173 | -5.027016143 |
| 1435864_a_at | 0.090252731  | 8.711371054 | 1.161975753  | 0.273886064 | 0.273886064 | -5.02704583  |
| 1420747_at   | -0.143819559 | 7.371909212 | -1.161931286 | 0.273903257 | 0.273903257 | -5.027088756 |
| 1444344_at   | -0.079313052 | 6.449421117 | -1.161886796 | 0.273920461 | 0.273920461 | -5.027131702 |
| 1416390_at   | 0.126229429  | 8.558406208 | 1.161878626  | 0.27392362  | 0.27392362  | -5.027139589 |
| 1444014_at   | -0.129050214 | 4.358837112 | -1.161658476 | 0.274008762 | 0.274008762 | -5.027352085 |
| 1446412_at   | 0.128983859  | 6.049354707 | 1.161563058  | 0.274045671 | 0.274045671 | -5.027444176 |
| 1418126_at   | 0.09147688   | 5.113289764 | 1.161483342  | 0.274076509 | 0.274076509 | -5.027521109 |
| 1443749_x_at | -0.266566503 | 8.348761825 | -1.161454641 | 0.274087612 | 0.274087612 | -5.027548807 |
| 1432290_at   | -0.106971333 | 5.021469342 | -1.161335347 | 0.274133768 | 0.274133768 | -5.027663927 |
| 1449619_s_at | -0.098834293 | 6.088389747 | -1.161293776 | 0.274149853 | 0.274149853 | -5.027704042 |
| 1435431_at   | -0.074244626 | 8.523757774 | -1.161291433 | 0.27415076  | 0.27415076  | -5.027706303 |
| 1435735_x_at | -0.107568471 | 9.037635383 | -1.161260202 | 0.274162845 | 0.274162845 | -5.027736438 |
| 1458948_at   | -0.09035646  | 4.325456107 | -1.161221152 | 0.274177956 | 0.274177956 | -5.027774119 |
| 1428239_at   | 0.076899476  | 9.094653294 | 1.161194069  | 0.274188437 | 0.274188437 | -5.027800251 |
| 1458792_at   | -0.119590141 | 4.22040817  | -1.161170121 | 0.274197705 | 0.274197705 | -5.027823359 |
| 1418698_a_at | 0.086744632  | 8.553698898 | 1.161122969  | 0.274215954 | 0.274215954 | -5.027868854 |
| 1453427_at   | 0.22889111   | 6.795515884 | 1.161067917  | 0.27423726  | 0.27423726  | -5.027921969 |
| 1455154_at   | 0.129558139  | 8.768359531 | 1.160950873  | 0.274282565 | 0.274282565 | -5.028034892 |
| 1431579_at   | -0.089737871 | 4.097613771 | -1.160938431 | 0.274287382 | 0.274287382 | -5.028046895 |
| 1430641_at   | -0.109548039 | 5.431071461 | -1.160839922 | 0.274325517 | 0.274325517 | -5.028141928 |
| 1457860_at   | 0.087212595  | 3.830914741 | 1.160663343  | 0.274393886 | 0.274393886 | -5.028312261 |
| 1437684_at   | -0.098083245 | 4.756601637 | -1.160602024 | 0.274417631 | 0.274417631 | -5.028371407 |
| 1433340_at   | -0.115768604 | 4.205386362 | -1.16052641  | 0.274446914 | 0.274446914 | -5.028444338 |
| 1457448_at   | -0.07069244  | 4.993383729 | -1.160239216 | 0.274558157 | 0.274558157 | -5.02872131  |
| 1446911_at   | 0.096768327  | 3.752477595 | 1.160209468  | 0.274569682 | 0.274569682 | -5.028749997 |
| 1443205_at   | 0.08558932   | 3.84099634  | 1.160056992  | 0.27462876  | 0.27462876  | -5.028897024 |
| 1428549_at   | 0.095318368  | 9.244284304 | 1.159988771  | 0.274655195 | 0.274655195 | -5.028962802 |
| 1431953_at   | -0.090005575 | 3.458624671 | -1.159916761 | 0.274683102 | 0.274683102 | -5.029032231 |
| 1433697_at   | 0.071188453  | 8.673748483 | 1.159897531  | 0.274690554 | 0.274690554 | -5.029050771 |
| 1451932_a_at | -0.079961235 | 4.662498577 | -1.159873423 | 0.274699898 | 0.274699898 | -5.029074014 |
| 1438777_a_at | -0.139533812 | 5.956865971 | -1.159845252 | 0.274710816 | 0.274710816 | -5.029101174 |
| 1438246_at   | 0.086343603  | 8.231872266 | 1.159714029  | 0.274761679 | 0.274761679 | -5.02922768  |
| 1415827_a_at | -0.084446515 | 11.29498176 | -1.159710906 | 0.27476289  | 0.27476289  | -5.029230691 |
| 1455413_at   | 0.127599808  | 6.269013104 | 1.159693057  | 0.274769809 | 0.274769809 | -5.029247897 |
| 1443495_at   | -0.112519595 | 6.16130297  | -1.159633392 | 0.274792938 | 0.274792938 | -5.029305413 |
| 1449533_at   | 0.138773665  | 6.533123238 | 1.15960829   | 0.27480267  | 0.27480267  | -5.029329611 |
| 1455471_at   | -0.09890391  | 3.427082179 | -1.159569432 | 0.274817735 | 0.274817735 | -5.029367067 |
| 1418543_s_at | 0.092092688  | 8.639364121 | 1.159535949  | 0.274830717 | 0.274830717 | -5.029399342 |
| 1420731_a_at | 0.091281349  | 10.87001612 | 1.159517549  | 0.27483785  | 0.27483785  | -5.029417077 |
| 1449498_at   | -0.091302269 | 4.578405631 | -1.159461729 | 0.274859494 | 0.274859494 | -5.029470881 |



|              |              |             |              |             |             |              |
|--------------|--------------|-------------|--------------|-------------|-------------|--------------|
| 1425637_at   | -0.107968459 | 4.551892255 | -1.159201909 | 0.274960253 | 0.274960253 | -5.029721292 |
| 1458506_at   | -0.169992186 | 4.196757121 | -1.159176689 | 0.274970035 | 0.274970035 | -5.029745597 |
| 1433552_a_at | 0.078681511  | 10.51795905 | 1.159104522  | 0.274998028 | 0.274998028 | -5.029815143 |
| 1417280_at   | 0.089295273  | 3.866372958 | 1.159096726  | 0.275001052 | 0.275001052 | -5.029822655 |
| 1457849_at   | -0.096371028 | 4.740461041 | -1.159076247 | 0.275008996 | 0.275008996 | -5.029842389 |
| 1452256_at   | 0.083075872  | 7.365582967 | 1.159012315  | 0.275033797 | 0.275033797 | -5.029903996 |
| 1449256_a_at | 0.122508214  | 10.23376177 | 1.158960086  | 0.275054059 | 0.275054059 | -5.029954322 |
| 1425170_a_at | -0.130209611 | 5.796505563 | -1.158927396 | 0.275066742 | 0.275066742 | -5.02998582  |
| 1441539_at   | 0.088131016  | 3.885425132 | 1.158917725  | 0.275070494 | 0.275070494 | -5.029995139 |
| 1453871_at   | -0.075672038 | 3.544355893 | -1.158854852 | 0.275094889 | 0.275094889 | -5.030055719 |
| 1432149_at   | -0.097659474 | 4.742848882 | -1.15875489  | 0.275133677 | 0.275133677 | -5.030152029 |
| 1427113_s_at | 0.084292329  | 8.316337355 | 1.158723911  | 0.275145699 | 0.275145699 | -5.030181875 |
| 1427156_s_at | 0.105792515  | 8.069513339 | 1.158566273  | 0.275206879 | 0.275206879 | -5.030333741 |
| 1432818_at   | -0.155559616 | 3.549724567 | -1.158552368 | 0.275212276 | 0.275212276 | -5.030347136 |
| 1438184_a_at | 0.136551701  | 3.933674785 | 1.158515068  | 0.275226754 | 0.275226754 | -5.030383067 |
| 1451620_at   | -0.123840344 | 6.371053247 | -1.158448524 | 0.275252585 | 0.275252585 | -5.030447168 |
| 1428267_at   | -0.075044045 | 8.557864332 | -1.158447724 | 0.275252895 | 0.275252895 | -5.030447939 |
| 1459338_at   | -0.10836392  | 8.503370109 | -1.158440357 | 0.275255755 | 0.275255755 | -5.030455035 |
| 1455259_a_at | 0.11358294   | 6.173363058 | 1.158386787  | 0.275276551 | 0.275276551 | -5.030506636 |
| 1427592_at   | -0.076104356 | 5.792208515 | -1.158376926 | 0.275280379 | 0.275280379 | -5.030516134 |
| 1447885_x_at | -0.081568509 | 4.488833914 | -1.158337699 | 0.275295608 | 0.275295608 | -5.030553918 |
| 1449585_at   | 0.119460162  | 3.843769082 | 1.158239287  | 0.275333817 | 0.275333817 | -5.030648704 |
| 1441720_at   | -0.124413018 | 4.779195789 | -1.158080211 | 0.275395589 | 0.275395589 | -5.030801909 |
| 1453449_at   | -0.102856158 | 3.597725915 | -1.158027605 | 0.275416019 | 0.275416019 | -5.03085257  |
| 1460487_at   | -0.101445412 | 3.912493311 | -1.158004033 | 0.275425174 | 0.275425174 | -5.030875271 |
| 1421403_at   | 0.12928365   | 4.486816653 | 1.157975375  | 0.275436304 | 0.275436304 | -5.030902868 |
| 1425926_a_at | 0.201580143  | 5.63051604  | 1.157949069  | 0.275446521 | 0.275446521 | -5.030928199 |
| 1454909_at   | -0.080607811 | 8.566753586 | -1.15793683  | 0.275451275 | 0.275451275 | -5.030939985 |
| 1436457_at   | 0.077368954  | 7.595853414 | 1.157874497  | 0.275475486 | 0.275475486 | -5.031000008 |
| 1451671_at   | -0.071856402 | 8.257826127 | -1.157760549 | 0.275519751 | 0.275519751 | -5.031109727 |
| 1440836_at   | -0.120142853 | 8.180949022 | -1.157647232 | 0.275563776 | 0.275563776 | -5.031218831 |
| 1453014_a_at | -0.097143719 | 10.35446992 | -1.157611358 | 0.275577715 | 0.275577715 | -5.03125337  |
| 1435094_at   | 0.099824063  | 3.73015897  | 1.157553929  | 0.27560003  | 0.27560003  | -5.031308659 |
| 1440461_at   | 0.151323064  | 7.770504586 | 1.157535264  | 0.275607283 | 0.275607283 | -5.031326628 |
| 1422793_at   | 0.10380406   | 9.297363435 | 1.157511374  | 0.275616566 | 0.275616566 | -5.031349628 |
| 1452015_at   | -0.155359223 | 4.922873396 | -1.157461765 | 0.275635844 | 0.275635844 | -5.031397385 |
| 1423593_a_at | -0.127522308 | 7.588206107 | -1.157425367 | 0.27564999  | 0.27564999  | -5.031432425 |
| 1417204_at   | 0.12454375   | 11.52993876 | 1.157357882  | 0.275676218 | 0.275676218 | -5.031497388 |
| 1436493_at   | -0.076138438 | 4.381172013 | -1.157332742 | 0.275685989 | 0.275685989 | -5.031521588 |
| 1420904_at   | 0.111580665  | 5.560290938 | 1.157325488  | 0.275688808 | 0.275688808 | -5.03152857  |
| 1452540_a_at | -0.100243471 | 9.311616641 | -1.157262401 | 0.27571333  | 0.27571333  | -5.031589297 |
| 1450371_at   | -0.095230982 | 4.033687886 | -1.157235972 | 0.275723603 | 0.275723603 | -5.031614735 |
| 1422934_x_at | -0.10241074  | 6.198530071 | -1.157201378 | 0.27573705  | 0.27573705  | -5.031648033 |
| 1459272_at   | 0.087816776  | 3.384935248 | 1.157189247  | 0.275741766 | 0.275741766 | -5.03165971  |
| 1436477_x_at | -0.075421857 | 3.779131117 | -1.157152046 | 0.275756228 | 0.275756228 | -5.031695516 |
| 1448618_at   | 0.106292788  | 5.009518175 | 1.157026246  | 0.275805136 | 0.275805136 | -5.031816592 |
| 1426884_at   | 0.081877021  | 9.582835675 | 1.157008785  | 0.275811925 | 0.275811925 | -5.031833397 |
| 1421755_at   | -0.094622131 | 3.974235284 | -1.157001744 | 0.275814663 | 0.275814663 | -5.031840173 |
| 1430226_at   | 0.101555127  | 4.749923309 | 1.156903231  | 0.275852969 | 0.275852969 | -5.03193498  |
| 1458908_at   | 0.084659387  | 3.2630127   | 1.156895678  | 0.275855906 | 0.275855906 | -5.031942247 |
| 1431458_at   | -0.086675009 | 4.515772411 | -1.156797582 | 0.275894054 | 0.275894054 | -5.032036646 |
| 1439321_at   | 0.094097709  | 7.627845694 | 1.156770572  | 0.275904558 | 0.275904558 | -5.032062637 |
| 1438408_at   | 0.086358032  | 5.26851887  | 1.156728992  | 0.27592073  | 0.27592073  | -5.032102648 |

|              |              |             |              |             |             |              |
|--------------|--------------|-------------|--------------|-------------|-------------|--------------|
| 1421324_a_at | -0.105374055 | 7.46063151  | -1.156705265 | 0.275929958 | 0.275929958 | -5.032125478 |
| 1430158_at   | -0.077316532 | 5.779215184 | -1.156632198 | 0.275958379 | 0.275958379 | -5.032195784 |
| 1421261_at   | -0.074790949 | 4.687600915 | -1.156610668 | 0.275966754 | 0.275966754 | -5.032216499 |
| 1420532_at   | -0.072400898 | 6.634141386 | -1.156520111 | 0.276001981 | 0.276001981 | -5.032303628 |
| 1431283_at   | -0.081674738 | 5.519672944 | -1.156451413 | 0.276028707 | 0.276028707 | -5.032369722 |
| 1458498_at   | 0.082271424  | 3.371648098 | 1.15632582   | 0.276077574 | 0.276077574 | -5.032490547 |
| 1451134_a_at | -0.076968509 | 10.13812292 | -1.156038546 | 0.276189374 | 0.276189374 | -5.032766879 |
| 1436054_at   | 0.082516909  | 8.027610018 | 1.156024777  | 0.276194733 | 0.276194733 | -5.032780122 |
| 1416242_at   | -0.138205864 | 7.819509175 | -1.155782651 | 0.276288992 | 0.276288992 | -5.033012987 |
| 1445571_at   | -0.113012518 | 5.112393382 | -1.155763866 | 0.276296306 | 0.276296306 | -5.033031051 |
| 1460514_s_at | -0.097241414 | 4.771069852 | -1.155638448 | 0.276345142 | 0.276345142 | -5.033151657 |
| 1436487_x_at | 0.084344727  | 5.699030678 | 1.155611555  | 0.276355614 | 0.276355614 | -5.033177516 |
| 1456409_at   | 0.074115722  | 3.505170053 | 1.155546269  | 0.276381039 | 0.276381039 | -5.033240293 |
| 1424378_at   | 0.110353907  | 7.351528869 | 1.155522886  | 0.276390146 | 0.276390146 | -5.033262775 |
| 1427538_at   | -0.098996745 | 3.932491898 | -1.155330723 | 0.276464995 | 0.276464995 | -5.033447534 |
| 1451228_a_at | 0.110185768  | 4.661284484 | 1.155072392  | 0.276565641 | 0.276565641 | -5.033695875 |
| 1416386_a_at | 0.092384774  | 8.895827014 | 1.154919525  | 0.276625212 | 0.276625212 | -5.033842811 |
| 1432538_a_at | 0.11342265   | 8.695350367 | 1.154917326  | 0.276626069 | 0.276626069 | -5.033844925 |
| 1432288_at   | -0.091228417 | 4.051813757 | -1.154817541 | 0.27666496  | 0.27666496  | -5.033940831 |
| 1449709_s_at | 0.074464505  | 8.442262695 | 1.154770153  | 0.276683431 | 0.276683431 | -5.033986375 |
| 1431157_at   | -0.1096567   | 3.875795902 | -1.154693373 | 0.27671336  | 0.27671336  | -5.034060164 |
| 1439708_at   | -0.217672512 | 5.490408553 | -1.154588662 | 0.276754182 | 0.276754182 | -5.034160791 |
| 1419977_s_at | -0.116781542 | 4.650574062 | -1.154414002 | 0.276822283 | 0.276822283 | -5.034328623 |
| 1460609_at   | -0.123157185 | 5.638471072 | -1.154404853 | 0.276825851 | 0.276825851 | -5.034337414 |
| 1454161_s_at | -0.070754791 | 9.318940995 | -1.154219114 | 0.276898287 | 0.276898287 | -5.034515872 |
| 1458167_at   | 0.099317148  | 3.911903631 | 1.154194615  | 0.276907843 | 0.276907843 | -5.034539409 |
| 1436764_at   | 0.120679076  | 8.263110788 | 1.154157951  | 0.276922144 | 0.276922144 | -5.034574633 |
| 1433006_at   | -0.11619338  | 4.640270651 | -1.154081596 | 0.276951928 | 0.276951928 | -5.034647986 |
| 1435470_at   | -0.08505083  | 7.05052668  | -1.153986839 | 0.276988893 | 0.276988893 | -5.034739012 |
| 1418741_at   | -0.113299868 | 5.745560876 | -1.153898583 | 0.277023327 | 0.277023327 | -5.034823789 |
| 1417584_at   | -0.087233667 | 6.836045496 | -1.15389541  | 0.277024565 | 0.277024565 | -5.034826837 |
| 1419251_at   | -0.076614612 | 7.127696639 | -1.153886946 | 0.277027867 | 0.277027867 | -5.034834967 |
| 1443425_at   | -0.087898533 | 5.4036141   | -1.153870406 | 0.277034321 | 0.277034321 | -5.034850854 |
| 1459788_at   | 0.133480791  | 5.989997956 | 1.153867472  | 0.277035465 | 0.277035465 | -5.034853672 |
| 1447641_at   | -0.088641092 | 3.827039476 | -1.15376771  | 0.277074393 | 0.277074393 | -5.034949494 |
| 1440078_at   | -0.081480046 | 7.980918805 | -1.153765794 | 0.277075141 | 0.277075141 | -5.034951335 |
| 1420863_at   | 0.17837525   | 4.911026244 | 1.153736107  | 0.277086726 | 0.277086726 | -5.034979848 |
| 1424504_at   | 0.221413043  | 6.673452639 | 1.153734899  | 0.277087197 | 0.277087197 | -5.034981008 |
| 1447946_at   | 0.083050126  | 6.195479693 | 1.153734744  | 0.277087258 | 0.277087258 | -5.034981157 |
| 1417603_at   | -0.159067533 | 5.425623466 | -1.153731725 | 0.277088436 | 0.277088436 | -5.034984056 |
| 1446030_at   | 0.105415593  | 3.284865389 | 1.153722772  | 0.27709193  | 0.27709193  | -5.034992655 |
| 1425524_at   | 0.107958234  | 6.939079301 | 1.153704778  | 0.277098952 | 0.277098952 | -5.035009938 |
| 1421753_a_at | -0.105072632 | 4.08196525  | -1.153497907 | 0.277179694 | 0.277179694 | -5.035208611 |
| 1433497_at   | 0.100912465  | 9.744378767 | 1.153486867  | 0.277184003 | 0.277184003 | -5.035219213 |
| 1458937_at   | -0.101252321 | 3.67948843  | -1.15335642  | 0.277234927 | 0.277234927 | -5.035344477 |
| 1459924_at   | -0.082278629 | 5.218853451 | -1.153320659 | 0.277248889 | 0.277248889 | -5.035378815 |
| 1456880_at   | 0.082211621  | 8.5892761   | 1.153161704  | 0.277310954 | 0.277310954 | -5.035531437 |
| 1430218_at   | -0.090110628 | 3.68955799  | -1.153029866 | 0.27736244  | 0.27736244  | -5.035658011 |
| 1422415_at   | -0.091555093 | 3.908383595 | -1.153029352 | 0.27736264  | 0.27736264  | -5.035658505 |
| 1457010_at   | 0.118210916  | 6.387539184 | 1.152952725  | 0.277392568 | 0.277392568 | -5.035732067 |
| 1442532_at   | -0.093856642 | 4.993321496 | -1.152949528 | 0.277393817 | 0.277393817 | -5.035735137 |
| 1459143_at   | -0.114061987 | 5.502688185 | -1.152860733 | 0.277428501 | 0.277428501 | -5.035820376 |
| 1431622_at   | -0.097664824 | 3.311764707 | -1.152750074 | 0.277471729 | 0.277471729 | -5.035926597 |

|              |              |             |              |             |             |              |
|--------------|--------------|-------------|--------------|-------------|-------------|--------------|
| 1455169_at   | 0.097226287  | 8.337303798 | 1.152615854  | 0.277524169 | 0.277524169 | -5.036055425 |
| 1435715_x_at | 0.095886499  | 10.42699258 | 1.152595912  | 0.277531961 | 0.277531961 | -5.036074564 |
| 1429121_at   | 0.102552714  | 7.366952443 | 1.152583409  | 0.277536847 | 0.277536847 | -5.036086565 |
| 1428919_at   | -0.094325764 | 8.702963619 | -1.152476654 | 0.277578563 | 0.277578563 | -5.036189021 |
| 1454963_at   | 0.15717734   | 7.886325164 | 1.152463481  | 0.277583711 | 0.277583711 | -5.036201663 |
| 1453163_at   | -0.102610854 | 7.697763507 | -1.152406539 | 0.277605965 | 0.277605965 | -5.036256309 |
| 1435270_x_at | 0.09299633   | 7.681750415 | 1.152258199  | 0.277663944 | 0.277663944 | -5.036398659 |
| 1439965_at   | -0.120857085 | 6.640951436 | -1.15225461  | 0.277665347 | 0.277665347 | -5.036402102 |
| 1436180_at   | 0.075852052  | 9.909824936 | 1.151857499  | 0.277820608 | 0.277820608 | -5.036783111 |
| 1437562_at   | -0.114722314 | 3.632045645 | -1.151822857 | 0.277834155 | 0.277834155 | -5.036816344 |
| 1420571_at   | -0.081271301 | 3.630039611 | -1.151784444 | 0.277849178 | 0.277849178 | -5.036853193 |
| 1453651_a_at | -0.084553172 | 9.875083082 | -1.151667233 | 0.277895022 | 0.277895022 | -5.036965629 |
| 1436246_at   | 0.107864826  | 3.776357097 | 1.151600069  | 0.277921293 | 0.277921293 | -5.037030052 |
| 1441724_at   | -0.092545896 | 7.255919576 | -1.1515408   | 0.277944478 | 0.277944478 | -5.0370869   |
| 1420960_at   | -0.090573032 | 6.385418097 | -1.151482667 | 0.277967221 | 0.277967221 | -5.037142657 |
| 1425559_a_at | -0.127669261 | 4.128351358 | -1.151469637 | 0.277972319 | 0.277972319 | -5.037155154 |
| 1456955_at   | -0.08507663  | 6.638364567 | -1.151434625 | 0.277986017 | 0.277986017 | -5.037188734 |
| 1435617_at   | -0.115740942 | 5.650529505 | -1.151431788 | 0.277987127 | 0.277987127 | -5.037191455 |
| 1447536_at   | 0.095235924  | 3.473239635 | 1.151421112  | 0.277991304 | 0.277991304 | -5.037201694 |
| 1430667_at   | -0.159201974 | 6.07284059  | -1.151407175 | 0.277996757 | 0.277996757 | -5.037215061 |
| 1426579_at   | -0.074790694 | 9.086630055 | -1.151312424 | 0.278033831 | 0.278033831 | -5.03730593  |
| 1452783_at   | -0.08172334  | 9.649424498 | -1.151290285 | 0.278042494 | 0.278042494 | -5.037327161 |
| 1420321_at   | 0.091061039  | 3.390658867 | 1.151271973  | 0.27804966  | 0.27804966  | -5.037344722 |
| 1417849_at   | -0.117502581 | 8.440174293 | -1.151269717 | 0.278050542 | 0.278050542 | -5.037346885 |
| 1433388_at   | -0.099826412 | 4.560772795 | -1.151260279 | 0.278054236 | 0.278054236 | -5.037355936 |
| 1427246_at   | 0.092363176  | 5.384998044 | 1.151237957  | 0.278062971 | 0.278062971 | -5.037377343 |
| 1455115_a_at | 0.088482826  | 6.783416351 | 1.15114983   | 0.27809746  | 0.27809746  | -5.037461851 |
| 1416146_at   | 0.081209404  | 10.48164557 | 1.151019419  | 0.278148502 | 0.278148502 | -5.037586898 |
| 1422363_at   | -0.088900993 | 4.568598325 | -1.150902183 | 0.278194395 | 0.278194395 | -5.037699303 |
| 1442117_at   | -0.102941877 | 4.725863851 | -1.150879759 | 0.278203174 | 0.278203174 | -5.037720802 |
| 1419597_at   | -0.100054359 | 6.135223184 | -1.150875751 | 0.278204743 | 0.278204743 | -5.037724645 |
| 1417572_at   | 0.092667022  | 6.406219148 | 1.150853001  | 0.278213649 | 0.278213649 | -5.037746457 |
| 1439943_at   | 0.161281225  | 4.563764728 | 1.150730529  | 0.2782616   | 0.2782616   | -5.03786387  |
| 1453019_at   | 0.10479967   | 7.480522615 | 1.150523762  | 0.27834257  | 0.27834257  | -5.038062076 |
| 1452682_at   | -0.088293474 | 8.047831751 | -1.150271801 | 0.278441263 | 0.278441263 | -5.03830357  |
| 1420311_s_at | -0.107391884 | 3.642666526 | -1.150269042 | 0.278442344 | 0.278442344 | -5.038306214 |
| 1458434_at   | 0.074691121  | 3.154409613 | 1.150184894  | 0.278475311 | 0.278475311 | -5.038386858 |
| 1430059_at   | -0.082527639 | 5.51538433  | -1.150135846 | 0.278494528 | 0.278494528 | -5.038433861 |
| 1454622_at   | -0.10328237  | 3.959430062 | -1.150099491 | 0.278508773 | 0.278508773 | -5.038468699 |
| 1418191_at   | -0.124294239 | 5.106073278 | -1.150082167 | 0.278515561 | 0.278515561 | -5.038485301 |
| 1425504_at   | -0.112687218 | 4.575369438 | -1.150079264 | 0.278516699 | 0.278516699 | -5.038488083 |
| 1447704_s_at | 0.086027329  | 7.397359323 | 1.150066665  | 0.278521635 | 0.278521635 | -5.038500156 |
| 1450882_s_at | -0.08798217  | 6.443524997 | -1.15005792  | 0.278525062 | 0.278525062 | -5.038508536 |
| 1447364_x_at | 0.092787781  | 6.898578827 | 1.150050273  | 0.278528059 | 0.278528059 | -5.038515864 |
| 1450444_a_at | -0.109987115 | 5.437761898 | -1.150026933 | 0.278537204 | 0.278537204 | -5.038538229 |
| 1425759_at   | -0.117979149 | 5.298094553 | -1.149902216 | 0.27858608  | 0.27858608  | -5.038657733 |
| 1437877_at   | -0.184658934 | 3.918216378 | -1.149853775 | 0.278605065 | 0.278605065 | -5.038704147 |
| 1460152_at   | -0.151361763 | 4.979298037 | -1.149778662 | 0.278634506 | 0.278634506 | -5.038776113 |
| 1436700_a_at | -0.099533262 | 4.741947484 | -1.149487492 | 0.278748654 | 0.278748654 | -5.039055054 |
| 1454266_at   | 0.124226097  | 4.101562226 | 1.149478124  | 0.278752328 | 0.278752328 | -5.039064028 |
| 1434508_at   | 0.075555491  | 8.688112487 | 1.149445283  | 0.278765205 | 0.278765205 | -5.039095486 |
| 1434992_at   | -0.101127185 | 6.1110031   | -1.149422283 | 0.278774224 | 0.278774224 | -5.039117518 |
| 1421958_at   | 0.093181334  | 3.956388112 | 1.149400657  | 0.278782704 | 0.278782704 | -5.039138233 |

|              |              |             |              |             |             |              |
|--------------|--------------|-------------|--------------|-------------|-------------|--------------|
| 1447995_x_at | -0.074787456 | 7.747974522 | -1.149399036 | 0.27878334  | 0.27878334  | -5.039139785 |
| 1457916_at   | -0.095118671 | 3.624605729 | -1.149253096 | 0.278840573 | 0.278840573 | -5.039279569 |
| 1421563_at   | -0.124415873 | 5.434711852 | -1.149112935 | 0.278895548 | 0.278895548 | -5.039413805 |
| 1432682_at   | 0.078023311  | 3.291863695 | 1.149087909  | 0.278905365 | 0.278905365 | -5.039437772 |
| 1449626_s_at | 0.190865496  | 6.116425867 | 1.149081979  | 0.278907691 | 0.278907691 | -5.039443451 |
| 1426616_at   | -0.107946645 | 5.549166273 | -1.149057064 | 0.278917465 | 0.278917465 | -5.039467312 |
| 1458489_at   | 0.141811164  | 4.594467948 | 1.149007433  | 0.278936935 | 0.278936935 | -5.03951484  |
| 1424466_at   | 0.09925662   | 9.460842913 | 1.148917819  | 0.278972093 | 0.278972093 | -5.039600655 |
| 1419152_at   | -0.707978779 | 4.711392584 | -1.148882589 | 0.278985916 | 0.278985916 | -5.03963439  |
| 1425572_a_at | -0.121198936 | 8.487794544 | -1.148878003 | 0.278987715 | 0.278987715 | -5.039638781 |
| 1433974_at   | 0.094530867  | 9.32972795  | 1.148783984  | 0.279024607 | 0.279024607 | -5.039728806 |
| 1455719_at   | 0.100440562  | 10.52838849 | 1.148780424  | 0.279026003 | 0.279026003 | -5.039732214 |
| 1416578_at   | 0.102353914  | 9.308845947 | 1.14877654   | 0.279027528 | 0.279027528 | -5.039735933 |
| 1457099_at   | 0.101525088  | 4.380632235 | 1.148761369  | 0.279033481 | 0.279033481 | -5.03975046  |
| 1453231_at   | 0.119533708  | 3.515402174 | 1.148710739  | 0.279053349 | 0.279053349 | -5.039798935 |
| 1444633_at   | -0.096452854 | 3.928782241 | -1.148668554 | 0.279069905 | 0.279069905 | -5.039839325 |
| 1452821_at   | -0.137399923 | 9.228090982 | -1.148664423 | 0.279071526 | 0.279071526 | -5.039843281 |
| 1421453_at   | -0.088655102 | 5.988431796 | -1.148641279 | 0.279080609 | 0.279080609 | -5.039865439 |
| 1438898_at   | -0.09605665  | 3.79492586  | -1.148606335 | 0.279094324 | 0.279094324 | -5.039898894 |
| 1456331_at   | -0.153133205 | 6.606538709 | -1.148564691 | 0.279110669 | 0.279110669 | -5.039938762 |
| 1445967_at   | -0.089393897 | 5.034597175 | -1.148544905 | 0.279118435 | 0.279118435 | -5.039957705 |
| 1425792_a_at | -0.093467048 | 4.308034708 | -1.148535479 | 0.279122135 | 0.279122135 | -5.039966729 |
| 1421411_at   | 0.129903441  | 3.695841062 | 1.148478581  | 0.279144469 | 0.279144469 | -5.040021198 |
| 1427097_at   | -0.081420546 | 8.5507367   | -1.148387925 | 0.279180057 | 0.279180057 | -5.040107982 |
| 1425324_x_at | 0.09474762   | 3.824352137 | 1.148078368  | 0.279301603 | 0.279301603 | -5.040404278 |
| 1421257_at   | -0.08332724  | 4.226911158 | -1.147974632 | 0.279342344 | 0.279342344 | -5.040503557 |
| 1432961_at   | 0.105674636  | 3.055648528 | 1.147854205  | 0.279389646 | 0.279389646 | -5.040618802 |
| 1444651_at   | -0.127266126 | 7.886045766 | -1.147798685 | 0.279411456 | 0.279411456 | -5.040671931 |
| 1441726_at   | 0.075105236  | 4.666477958 | 1.147781568  | 0.27941818  | 0.27941818  | -5.04068831  |
| 1443936_at   | -0.119715726 | 3.501735341 | -1.147736427 | 0.279435914 | 0.279435914 | -5.040731504 |
| 1446456_at   | -0.11830487  | 5.576827071 | -1.147730943 | 0.279438068 | 0.279438068 | -5.040736752 |
| 1441529_at   | -0.1044126   | 4.608831169 | -1.147697796 | 0.279451091 | 0.279451091 | -5.040768469 |
| 1435631_x_at | -0.099239982 | 5.9909528   | -1.147690529 | 0.279453945 | 0.279453945 | -5.040775421 |
| 1433802_at   | -0.097088087 | 6.604492264 | -1.147672526 | 0.279461019 | 0.279461019 | -5.040792648 |
| 1422030_at   | 0.091284167  | 3.914088518 | 1.147635161  | 0.2794757   | 0.2794757   | -5.040828399 |
| 1436187_at   | 0.077439755  | 6.435067794 | 1.147620632  | 0.279481408 | 0.279481408 | -5.0408423   |
| 1459942_at   | -0.535054833 | 5.740215544 | -1.147461996 | 0.279543744 | 0.279543744 | -5.040994074 |
| 1416896_at   | 0.099096951  | 7.994570285 | 1.147398665  | 0.279568633 | 0.279568633 | -5.041054662 |
| 1449888_at   | -0.116429919 | 5.774139408 | -1.147334495 | 0.279593853 | 0.279593853 | -5.04111605  |
| 1425880_x_at | 0.086313974  | 3.812843995 | 1.147243697  | 0.279629542 | 0.279629542 | -5.041202907 |
| 1451835_at   | 0.09850256   | 7.029053022 | 1.147099881  | 0.279686078 | 0.279686078 | -5.04134047  |
| 1459286_at   | -0.090254652 | 3.143323396 | -1.147073714 | 0.279696366 | 0.279696366 | -5.041365499 |
| 1448046_at   | -0.086017542 | 4.640390347 | -1.147062526 | 0.279700764 | 0.279700764 | -5.041376199 |
| 1450298_at   | 0.098770271  | 3.601390927 | 1.146947959  | 0.27974581  | 0.27974581  | -5.041485774 |
| 1416748_a_at | 0.079504846  | 7.903782215 | 1.146934891  | 0.279750948 | 0.279750948 | -5.041498272 |
| 1449327_at   | -0.101707441 | 4.125594232 | -1.146927109 | 0.279754008 | 0.279754008 | -5.041505715 |
| 1440640_at   | 0.10380119   | 3.813246745 | 1.146876819  | 0.279773784 | 0.279773784 | -5.04155381  |
| 1416281_at   | 0.083563791  | 10.18967462 | 1.146826325  | 0.279793641 | 0.279793641 | -5.041602099 |
| 1456656_at   | 0.225827274  | 5.812039853 | 1.146814089  | 0.279798453 | 0.279798453 | -5.041613801 |
| 1436584_at   | 0.137876001  | 7.418477796 | 1.146690676  | 0.27984699  | 0.27984699  | -5.041731818 |
| 1420099_at   | -0.092095829 | 4.805480191 | -1.146665969 | 0.279856708 | 0.279856708 | -5.041755443 |
| 1455980_a_at | 0.154404799  | 7.706262476 | 1.146650072  | 0.279862961 | 0.279862961 | -5.041770644 |
| 1457125_at   | 0.099795154  | 3.984968347 | 1.146646317  | 0.279864438 | 0.279864438 | -5.041774235 |

|              |              |             |              |             |             |              |
|--------------|--------------|-------------|--------------|-------------|-------------|--------------|
| 1433800_a_at | -0.10188312  | 6.44089097  | -1.146563522 | 0.279897006 | 0.279897006 | -5.041853402 |
| 1439151_at   | 0.110418784  | 6.61787355  | 1.146433594  | 0.27994812  | 0.27994812  | -5.041977628 |
| 1421754_at   | 0.098355265  | 10.00126701 | 1.146413135  | 0.27995617  | 0.27995617  | -5.041997188 |
| 1427277_at   | 0.10908032   | 7.872253624 | 1.146320928  | 0.27999245  | 0.27999245  | -5.042085343 |
| 1436529_at   | 0.109202415  | 5.14890938  | 1.146319059  | 0.279993185 | 0.279993185 | -5.042087129 |
| 1436242_a_at | -0.092288931 | 9.198302649 | -1.146317359 | 0.279993854 | 0.279993854 | -5.042088754 |
| 1416109_at   | -0.073490371 | 9.220903316 | -1.146291699 | 0.280003951 | 0.280003951 | -5.042113285 |
| 1416593_at   | 0.155122344  | 6.959984186 | 1.146009618  | 0.280114966 | 0.280114966 | -5.04238293  |
| 1424260_at   | 0.115455763  | 3.598773513 | 1.14596793   | 0.280131376 | 0.280131376 | -5.042422777 |
| 1439507_at   | 0.109614513  | 3.775663274 | 1.145909993  | 0.280154183 | 0.280154183 | -5.042478152 |
| 1421304_at   | -0.079396588 | 3.197902498 | -1.145795633 | 0.280199205 | 0.280199205 | -5.042587449 |
| 1438405_at   | -0.144094111 | 7.509866381 | -1.145794744 | 0.280199555 | 0.280199555 | -5.042588299 |
| 1440387_at   | 0.082058366  | 6.369368427 | 1.145769951  | 0.280209317 | 0.280209317 | -5.042611993 |
| 1459885_s_at | 0.145585255  | 7.821891257 | 1.145669563  | 0.280248844 | 0.280248844 | -5.04270793  |
| 1421023_at   | -0.080824455 | 9.135909841 | -1.145669288 | 0.280248952 | 0.280248952 | -5.042708192 |
| 1422225_s_at | -0.126674863 | 5.031523612 | -1.145640576 | 0.280260258 | 0.280260258 | -5.042735629 |
| 1448154_at   | 0.097848818  | 8.597099697 | 1.14562468   | 0.280266518 | 0.280266518 | -5.04275082  |
| 1452112_a_at | 0.075033071  | 6.798664385 | 1.145607555  | 0.280273262 | 0.280273262 | -5.042767185 |
| 1421498_a_at | -0.134745003 | 7.959573708 | -1.145577196 | 0.280285217 | 0.280285217 | -5.042796195 |
| 1455016_at   | 0.251921885  | 6.602146091 | 1.145489597  | 0.280319716 | 0.280319716 | -5.042879899 |
| 1450706_a_at | 0.084490584  | 10.44441876 | 1.145354148  | 0.280373066 | 0.280373066 | -5.043009317 |
| 1424035_at   | -0.115257392 | 4.373493806 | -1.145349    | 0.280375094 | 0.280375094 | -5.043014236 |
| 1427127_x_at | 0.125336007  | 7.532627287 | 1.145348533  | 0.280375278 | 0.280375278 | -5.043014681 |
| 1423796_at   | 0.124753294  | 8.829122986 | 1.145299727  | 0.280394504 | 0.280394504 | -5.043061312 |
| 1419866_s_at | 0.085048838  | 9.346606097 | 1.145283402  | 0.280400934 | 0.280400934 | -5.043076908 |
| 1425266_a_at | -0.115601602 | 9.210904366 | -1.145130362 | 0.280461228 | 0.280461228 | -5.043223114 |
| 1431011_at   | -0.110750337 | 6.003957353 | -1.145117643 | 0.280466239 | 0.280466239 | -5.043235265 |
| 1417522_at   | -0.08994822  | 4.876809378 | -1.145111551 | 0.280468664 | 0.280468664 | -5.043241085 |
| 1452605_at   | 0.124689352  | 6.201841855 | 1.145076099  | 0.280482608 | 0.280482608 | -5.043274951 |
| 1439861_at   | 0.094966587  | 6.675631218 | 1.145060473  | 0.280488766 | 0.280488766 | -5.043289878 |
| 1459807_x_at | -0.104011656 | 5.615695218 | -1.14494354  | 0.280534844 | 0.280534844 | -5.043401574 |
| 1426543_x_at | 0.110647771  | 6.102734659 | 1.144901983  | 0.280551222 | 0.280551222 | -5.043441269 |
| 1433117_at   | 0.148959332  | 4.906738144 | 1.144786961  | 0.280596555 | 0.280596555 | -5.04355113  |
| 1440297_at   | -0.097253546 | 4.020710706 | -1.144660927 | 0.280646236 | 0.280646236 | -5.043671499 |
| 1430299_at   | -0.185595592 | 5.801990374 | -1.144658889 | 0.280647039 | 0.280647039 | -5.043673445 |
| 1458119_at   | 0.116692286  | 5.339509343 | 1.144605601  | 0.280668047 | 0.280668047 | -5.043724336 |
| 1416708_a_at | 0.103411077  | 8.629934384 | 1.144581757  | 0.280677447 | 0.280677447 | -5.043747105 |
| 1438658_a_at | 0.101996383  | 11.61429885 | 1.144572577  | 0.280681066 | 0.280681066 | -5.043755872 |
| 1445052_at   | 0.078813589  | 3.430403445 | 1.1445689    | 0.280682516 | 0.280682516 | -5.043759384 |
| 1458567_at   | -0.073356284 | 6.213428359 | -1.144517567 | 0.280702754 | 0.280702754 | -5.043808404 |
| 1418793_at   | -0.085913458 | 7.550754623 | -1.144489012 | 0.280714013 | 0.280714013 | -5.043835672 |
| 1438316_a_at | 0.114069654  | 7.494992996 | 1.14440399   | 0.280747537 | 0.280747537 | -5.043916858 |
| 1443582_at   | -0.103520046 | 4.698239589 | -1.144391961 | 0.280752281 | 0.280752281 | -5.043928344 |
| 1428310_at   | 0.090795517  | 8.740876634 | 1.144266382  | 0.280801803 | 0.280801803 | -5.044048249 |
| 1442403_at   | 0.105425791  | 4.516843844 | 1.144147518  | 0.280848685 | 0.280848685 | -5.044161734 |
| 1447778_x_at | 0.083516132  | 7.882381374 | 1.14413347   | 0.280854226 | 0.280854226 | -5.044175145 |
| 1434474_at   | -0.111943962 | 8.349672267 | -1.14412307  | 0.280858328 | 0.280858328 | -5.044185074 |
| 1425636_at   | -0.083122347 | 5.568886135 | -1.14405193  | 0.28088639  | 0.28088639  | -5.044252989 |
| 1420685_at   | -0.088688598 | 4.32803614  | -1.144038944 | 0.280891513 | 0.280891513 | -5.044265386 |
| 1454659_at   | -0.085300759 | 8.350151029 | -1.143959761 | 0.28092275  | 0.28092275  | -5.044340975 |
| 1457259_at   | 0.169224868  | 6.809378272 | 1.143924625  | 0.280936612 | 0.280936612 | -5.044374516 |
| 1426554_a_at | 0.085081426  | 10.92543362 | 1.143921194  | 0.280937966 | 0.280937966 | -5.044377791 |
| 1450892_a_at | 0.075234626  | 8.786716706 | 1.143865878  | 0.280959791 | 0.280959791 | -5.044430593 |

|              |              |             |              |             |             |              |
|--------------|--------------|-------------|--------------|-------------|-------------|--------------|
| 1445652_at   | 0.084086422  | 3.371200876 | 1.143836757  | 0.280971281 | 0.280971281 | -5.04445839  |
| 1449236_at   | 0.079003588  | 4.417365881 | 1.143709073  | 0.281021665 | 0.281021665 | -5.044580263 |
| 1448428_at   | 0.112493871  | 8.326780304 | 1.143641086  | 0.281048495 | 0.281048495 | -5.04464515  |
| 1453833_a_at | 0.082914658  | 7.739015983 | 1.143593552  | 0.281067255 | 0.281067255 | -5.044690516 |
| 1456949_at   | -0.122830376 | 5.506875964 | -1.143559205 | 0.281080812 | 0.281080812 | -5.044723295 |
| 1442450_at   | -0.08464492  | 3.561799864 | -1.143539302 | 0.281088667 | 0.281088667 | -5.04474229  |
| 1455446_x_at | 0.095829689  | 8.64657908  | 1.143358837  | 0.281159904 | 0.281159904 | -5.044914506 |
| 1449733_s_at | 0.088424129  | 8.559677296 | 1.143241262  | 0.281206324 | 0.281206324 | -5.045026695 |
| 1434187_at   | 0.095860058  | 8.827821471 | 1.143229177  | 0.281211095 | 0.281211095 | -5.045038226 |
| 1440249_at   | -0.107758785 | 4.115964007 | -1.143148663 | 0.281242887 | 0.281242887 | -5.045115047 |
| 1427581_at   | 0.094597516  | 6.093723016 | 1.14314201   | 0.281245514 | 0.281245514 | -5.045121395 |
| 1430005_a_at | -0.090721222 | 5.546829286 | -1.143103288 | 0.281260805 | 0.281260805 | -5.045158339 |
| 1440462_at   | -0.09679904  | 7.450771705 | -1.143044767 | 0.281283915 | 0.281283915 | -5.045214172 |
| 1450359_at   | -0.139469766 | 4.50900935  | -1.143030621 | 0.281289501 | 0.281289501 | -5.045227668 |
| 1420258_at   | -0.077491506 | 3.596742592 | -1.143024829 | 0.281291789 | 0.281291789 | -5.045233194 |
| 1437464_at   | -0.166734722 | 6.281962986 | -1.142893605 | 0.281343616 | 0.281343616 | -5.04535838  |
| 1453165_at   | 0.08314976   | 6.441760758 | 1.142854915  | 0.281358899 | 0.281358899 | -5.045395287 |
| 1425624_at   | 0.101380766  | 5.661004365 | 1.142829611  | 0.281368894 | 0.281368894 | -5.045419426 |
| 1451095_at   | 0.088414414  | 8.8728405   | 1.14278546   | 0.281386335 | 0.281386335 | -5.045461541 |
| 1442512_at   | 0.130643886  | 4.446278481 | 1.142718452  | 0.281412806 | 0.281412806 | -5.045525458 |
| 1442257_at   | 0.187661271  | 7.597385855 | 1.142623395  | 0.281450362 | 0.281450362 | -5.045616126 |
| 1419313_at   | -0.129525118 | 8.564434682 | -1.142557421 | 0.281476429 | 0.281476429 | -5.04567905  |
| 1445014_at   | -0.12482117  | 3.669783894 | -1.142545038 | 0.281481322 | 0.281481322 | -5.045690859 |
| 1449725_at   | 0.092887302  | 3.281306018 | 1.142456722  | 0.28151622  | 0.28151622  | -5.045775088 |
| 1420691_at   | -0.092219467 | 3.690384328 | -1.142399826 | 0.281538705 | 0.281538705 | -5.045829348 |
| 1444131_at   | -0.208403632 | 5.680531059 | -1.142348173 | 0.281559119 | 0.281559119 | -5.045878607 |
| 1418515_at   | 0.093235286  | 8.572811432 | 1.142292978  | 0.281580934 | 0.281580934 | -5.045931241 |
| 1418451_at   | 0.109586621  | 7.886474443 | 1.142200449  | 0.281617508 | 0.281617508 | -5.046019473 |
| 1443414_at   | -0.116069957 | 5.94641201  | -1.14215294  | 0.281636289 | 0.281636289 | -5.046064774 |
| 1420495_a_at | 0.077313374  | 9.266612686 | 1.142113771  | 0.281651773 | 0.281651773 | -5.046102121 |
| 1449737_at   | -0.08268092  | 3.48228539  | -1.142097783 | 0.281658093 | 0.281658093 | -5.046117365 |
| 1450627_at   | -0.095708835 | 8.680884076 | -1.142061554 | 0.281672416 | 0.281672416 | -5.046151909 |
| 1423129_at   | -0.103225778 | 9.586754167 | -1.142052246 | 0.281676096 | 0.281676096 | -5.046160783 |
| 1441644_at   | -0.163542813 | 5.204172573 | -1.141959007 | 0.28171296  | 0.28171296  | -5.046249679 |
| 1419222_at   | -0.08593487  | 6.730052488 | -1.141909549 | 0.281732516 | 0.281732516 | -5.046296831 |
| 1442507_at   | -0.10880249  | 4.130270194 | -1.141874008 | 0.28174657  | 0.28174657  | -5.046330713 |
| 1421038_a_at | -0.113325952 | 4.366144076 | -1.141843491 | 0.281758637 | 0.281758637 | -5.046359806 |
| 1444020_at   | 0.120634523  | 4.917886629 | 1.141768546  | 0.281788275 | 0.281788275 | -5.046431251 |
| 1430381_at   | -0.112338883 | 5.684412163 | -1.14173676  | 0.281800846 | 0.281800846 | -5.046461552 |
| 1416775_at   | 0.077280604  | 6.850370442 | 1.141685723  | 0.281821032 | 0.281821032 | -5.046510202 |
| 1422905_s_at | 0.098827843  | 6.041310363 | 1.14164185   | 0.281838385 | 0.281838385 | -5.046552022 |
| 1451313_a_at | 0.107268776  | 9.105827738 | 1.141616119  | 0.281848562 | 0.281848562 | -5.046576549 |
| 1430446_at   | 0.142529239  | 5.179130255 | 1.141606824  | 0.281852239 | 0.281852239 | -5.046585409 |
| 1451106_at   | -0.074574273 | 7.652295857 | -1.141593138 | 0.281857652 | 0.281857652 | -5.046598454 |
| 1437926_at   | -0.080360329 | 7.864589139 | -1.14158986  | 0.281858949 | 0.281858949 | -5.046601578 |
| 1431354_a_at | -0.080355713 | 8.536141394 | -1.1415606   | 0.281870523 | 0.281870523 | -5.046629468 |
| 1451446_at   | -0.115733653 | 10.01715258 | -1.141550352 | 0.281874577 | 0.281874577 | -5.046639235 |
| 1423751_at   | -0.08298415  | 6.459756606 | -1.141415136 | 0.281928069 | 0.281928069 | -5.04676811  |
| 1458588_at   | 0.073039526  | 6.511179064 | 1.141409601  | 0.281930259 | 0.281930259 | -5.046773385 |
| 1448332_at   | 0.076026081  | 8.208041222 | 1.141373384  | 0.281944588 | 0.281944588 | -5.046807902 |
| 1423834_s_at | -0.148187962 | 8.287552048 | -1.141345158 | 0.281955756 | 0.281955756 | -5.046834802 |
| 1430351_at   | -0.128662511 | 4.170209593 | -1.141314531 | 0.281967874 | 0.281967874 | -5.04686399  |
| 1425633_at   | -0.140101348 | 4.123264797 | -1.141267223 | 0.281986593 | 0.281986593 | -5.046909073 |

|                     |              |             |              |             |             |              |
|---------------------|--------------|-------------|--------------|-------------|-------------|--------------|
| 1455018_at          | -0.073456313 | 8.111976177 | -1.141189631 | 0.282017297 | 0.282017297 | -5.046983015 |
| 1452651_a_at        | -0.677590953 | 9.639206901 | -1.141154941 | 0.282031026 | 0.282031026 | -5.047016071 |
| 1425269_at          | -0.094352406 | 5.844370311 | -1.141068443 | 0.282065259 | 0.282065259 | -5.047098494 |
| 1453686_x_at        | -0.07506225  | 8.372109823 | -1.141046979 | 0.282073754 | 0.282073754 | -5.047118945 |
| 1453397_at          | -0.086933791 | 3.169225774 | -1.140965528 | 0.282105993 | 0.282105993 | -5.047196553 |
| 1437991_x_at        | -0.088704013 | 9.85160003  | -1.140943389 | 0.282114756 | 0.282114756 | -5.047217646 |
| 1444211_at          | -0.120222329 | 4.785574568 | -1.140914334 | 0.282126258 | 0.282126258 | -5.04724533  |
| 1423969_at          | 0.072095539  | 9.589722035 | 1.140834355  | 0.282157919 | 0.282157919 | -5.047321528 |
| 1433181_at          | 0.07956236   | 4.853450187 | 1.140799809  | 0.282171596 | 0.282171596 | -5.04735444  |
| 1449487_at          | -0.07919964  | 3.616753411 | -1.140789887 | 0.282175524 | 0.282175524 | -5.047363893 |
| 1459055_at          | 0.07439628   | 3.329895155 | 1.140755973  | 0.282188951 | 0.282188951 | -5.047396201 |
| 1441162_at          | 0.080249234  | 5.086857697 | 1.140733076  | 0.282198017 | 0.282198017 | -5.047418015 |
| 1437465_a_at        | -0.091211576 | 12.55469197 | -1.14070427  | 0.282209422 | 0.282209422 | -5.047445457 |
| 1450887_at          | -0.082930295 | 9.498028072 | -1.140667345 | 0.282224043 | 0.282224043 | -5.047480632 |
| 1451021_a_at        | -0.110351788 | 9.029668712 | -1.140593001 | 0.282253481 | 0.282253481 | -5.047551451 |
| 1424385_at          | 0.096593278  | 8.719889157 | 1.140591588  | 0.282254041 | 0.282254041 | -5.047552797 |
| 1437946_x_at        | -0.095463987 | 6.05169381  | -1.140576654 | 0.282259955 | 0.282259955 | -5.047567023 |
| 1440295_at          | 0.089018456  | 6.12665454  | 1.140537709  | 0.282275377 | 0.282275377 | -5.047604119 |
| 1459867_x_at        | 0.087489099  | 6.569305228 | 1.140532415  | 0.282277474 | 0.282277474 | -5.047609162 |
| 1447709_at          | -0.119414376 | 3.58678381  | -1.140484869 | 0.282296303 | 0.282296303 | -5.04765445  |
| 1451346_at          | 0.076819403  | 8.855931216 | 1.140469112  | 0.282302544 | 0.282302544 | -5.047669458 |
| 1446179_at          | -0.09679171  | 5.554787251 | -1.140299711 | 0.282369642 | 0.282369642 | -5.047830803 |
| 1436025_at          | -0.095850972 | 7.571740699 | -1.140290846 | 0.282373153 | 0.282373153 | -5.047839246 |
| 1458298_at          | 0.09264809   | 4.561253914 | 1.140125469  | 0.282438669 | 0.282438669 | -5.04799674  |
| 1451505_at          | 0.097278261  | 7.505659847 | 1.140040952  | 0.282472157 | 0.282472157 | -5.048077222 |
| 1430497_at          | -0.090216823 | 3.889025772 | -1.139993574 | 0.28249093  | 0.28249093  | -5.048122336 |
| AFFX-r2-Bs-thr-5_s. | 0.133275167  | 5.144658544 | 1.139961283  | 0.282503726 | 0.282503726 | -5.048153083 |
| 1439770_at          | 0.125215391  | 7.212193679 | 1.139901879  | 0.282527266 | 0.282527266 | -5.048209645 |
| 1433156_at          | 0.114688173  | 5.897585197 | 1.139786105  | 0.28257315  | 0.28257315  | -5.048319875 |
| 1432637_at          | 0.102331331  | 4.721103614 | 1.139733801  | 0.282593882 | 0.282593882 | -5.048369672 |
| 1420467_at          | 0.072102214  | 5.65835587  | 1.139727846  | 0.282596242 | 0.282596242 | -5.048375341 |
| 1451917_a_at        | -0.126374158 | 4.149724943 | -1.139676993 | 0.282616399 | 0.282616399 | -5.048423755 |
| 1455344_at          | 0.086451281  | 5.81683408  | 1.139648335  | 0.28262776  | 0.28262776  | -5.048451038 |
| 1446240_at          | 0.102556126  | 5.539550834 | 1.139646385  | 0.282628533 | 0.282628533 | -5.048452894 |
| 1421138_a_at        | 0.103339705  | 3.651164132 | 1.139628815  | 0.282635497 | 0.282635497 | -5.04846962  |
| 1417375_at          | -0.076538444 | 6.745863381 | -1.139622113 | 0.282638154 | 0.282638154 | -5.048476    |
| 1451776_s_at        | -0.097708744 | 6.141801752 | -1.139580836 | 0.282654518 | 0.282654518 | -5.048515295 |
| 1423190_at          | -0.090717255 | 4.102002811 | -1.139535929 | 0.282672321 | 0.282672321 | -5.048558043 |
| 1456399_at          | -0.101634592 | 8.073077742 | -1.139506835 | 0.282683856 | 0.282683856 | -5.048585738 |
| 1451030_at          | 0.099864379  | 4.357156022 | 1.139482192  | 0.282693626 | 0.282693626 | -5.048609197 |
| 1425605_a_at        | -0.08855166  | 6.736184112 | -1.13941325  | 0.282720962 | 0.282720962 | -5.048674821 |
| 1439502_at          | -0.110210778 | 7.680865846 | -1.139374102 | 0.282736485 | 0.282736485 | -5.048712083 |
| 1441802_at          | -0.097823114 | 6.287811065 | -1.139344416 | 0.282748256 | 0.282748256 | -5.048740338 |
| 1455698_at          | 0.084661463  | 7.539452632 | 1.139290469  | 0.282769649 | 0.282769649 | -5.048791685 |
| 1441193_at          | -0.077450741 | 3.298867362 | -1.139253709 | 0.282784227 | 0.282784227 | -5.048826672 |
| 1422217_a_at        | -0.113411539 | 3.951652527 | -1.139144738 | 0.282827446 | 0.282827446 | -5.048930382 |
| 1426146_a_at        | -0.12104645  | 6.665569627 | -1.139074544 | 0.282855288 | 0.282855288 | -5.048997183 |
| 1437408_at          | -0.123266834 | 6.627318251 | -1.138991562 | 0.282888205 | 0.282888205 | -5.049076151 |
| 1440773_at          | -0.205982903 | 5.632254468 | -1.138965482 | 0.282898551 | 0.282898551 | -5.049100969 |
| 1433347_at          | -0.109886534 | 3.605233214 | -1.138811611 | 0.282959598 | 0.282959598 | -5.049247382 |
| 1459416_at          | 0.102081607  | 3.543708579 | 1.138792768  | 0.282967075 | 0.282967075 | -5.049265311 |
| 1452482_at          | -0.128421626 | 4.555875355 | -1.138744465 | 0.282986241 | 0.282986241 | -5.04931127  |
| 1452757_s_at        | 0.080793432  | 13.94932051 | 1.13872345   | 0.28299458  | 0.28299458  | -5.049331265 |

|              |              |             |              |             |             |              |
|--------------|--------------|-------------|--------------|-------------|-------------|--------------|
| 1460025_at   | -0.085635768 | 7.19797913  | -1.13871672  | 0.282997251 | 0.282997251 | -5.049337668 |
| 1436717_x_at | 0.187332314  | 12.73905332 | 1.138618684  | 0.283036155 | 0.283036155 | -5.049430939 |
| 1450304_at   | 0.076845825  | 3.603658936 | 1.138530963  | 0.28307097  | 0.28307097  | -5.049514392 |
| 1417565_at   | 0.073035004  | 7.857375798 | 1.138509167  | 0.283079621 | 0.283079621 | -5.049535126 |
| 1451991_at   | 0.142930421  | 9.33819304  | 1.138475803  | 0.283092864 | 0.283092864 | -5.049566866 |
| 1433348_at   | -0.115459928 | 3.245507728 | -1.138416271 | 0.283116494 | 0.283116494 | -5.049623497 |
| 1450103_a_at | 0.097748775  | 9.56658981  | 1.138341082  | 0.283146342 | 0.283146342 | -5.049695018 |
| 1432783_at   | 0.113221663  | 4.087565787 | 1.138266907  | 0.283175789 | 0.283175789 | -5.049765573 |
| 1439104_at   | -0.124928089 | 6.284956066 | -1.138252027 | 0.283181697 | 0.283181697 | -5.049779726 |
| 1426445_at   | -0.099583517 | 8.039319983 | -1.138063138 | 0.283256698 | 0.283256698 | -5.049959376 |
| 1427843_at   | -0.096372804 | 5.198615132 | -1.138051932 | 0.283261148 | 0.283261148 | -5.049970034 |
| 1441200_at   | -0.086590501 | 7.871590439 | -1.138031117 | 0.283269414 | 0.283269414 | -5.04998983  |
| 1416412_at   | 0.115535001  | 8.090893942 | 1.137929087  | 0.283309934 | 0.283309934 | -5.050086859 |
| 1459091_at   | 0.093348008  | 3.592417405 | 1.137900799  | 0.283321169 | 0.283321169 | -5.050113759 |
| 1434730_at   | -0.089266449 | 4.441626343 | -1.137859137 | 0.283337717 | 0.283337717 | -5.050153377 |
| 1419232_a_at | -0.130368681 | 3.965197781 | -1.137826114 | 0.283350834 | 0.283350834 | -5.050184778 |
| 1450777_at   | 0.077531497  | 8.488491736 | 1.137819516  | 0.283353455 | 0.283353455 | -5.050191052 |
| 1456438_x_at | -0.129953936 | 11.78280485 | -1.137752837 | 0.283379941 | 0.283379941 | -5.050254455 |
| 1417611_at   | 0.082306165  | 6.585848348 | 1.137726749  | 0.283390304 | 0.283390304 | -5.05027926  |
| 1450673_at   | -0.119913313 | 7.767824343 | -1.137688846 | 0.283405362 | 0.283405362 | -5.0503153   |
| 1415734_at   | 0.079467131  | 10.23205282 | 1.137452855  | 0.283499126 | 0.283499126 | -5.050539665 |
| 1444448_at   | -0.149372837 | 5.085537448 | -1.137430526 | 0.283508    | 0.283508    | -5.050560893 |
| 1460583_at   | -0.168932984 | 7.091988209 | -1.137335456 | 0.283545781 | 0.283545781 | -5.050651269 |
| 1428700_at   | -0.107428267 | 5.227361771 | -1.137308634 | 0.283556441 | 0.283556441 | -5.050676765 |
| 1442931_at   | 0.088112862  | 6.151693043 | 1.13726984   | 0.283571859 | 0.283571859 | -5.050713642 |
| 1456484_at   | -0.195983402 | 6.253180084 | -1.137265088 | 0.283573748 | 0.283573748 | -5.050718158 |
| 1444119_at   | 0.09626488   | 8.33554439  | 1.137254223  | 0.283578066 | 0.283578066 | -5.050728487 |
| 1452973_at   | 0.074935834  | 7.950565323 | 1.137252307  | 0.283578828 | 0.283578828 | -5.050730308 |
| 1426283_at   | 0.152905755  | 5.583060317 | 1.137159117  | 0.283615869 | 0.283615869 | -5.050818886 |
| 1445471_at   | -0.090463134 | 4.031772414 | -1.137144246 | 0.28362178  | 0.28362178  | -5.050833021 |
| 1419603_at   | 0.083422966  | 3.392055905 | 1.137139579  | 0.283623636 | 0.283623636 | -5.050837457 |
| 1427475_a_at | 0.101773455  | 8.854418853 | 1.137123237  | 0.283630132 | 0.283630132 | -5.050852989 |
| 1422544_at   | -0.095045882 | 7.378575112 | -1.137115452 | 0.283633226 | 0.283633226 | -5.050860389 |
| 1442011_at   | -0.096845182 | 6.1989087   | -1.137066585 | 0.283652653 | 0.283652653 | -5.050906834 |
| 1424363_at   | -0.095285479 | 3.8758705   | -1.137061984 | 0.283654482 | 0.283654482 | -5.050911207 |
| 1441112_at   | 0.069366989  | 7.562408942 | 1.137046392  | 0.28366068  | 0.28366068  | -5.050926026 |
| 1459724_at   | 0.099002947  | 4.227031735 | 1.137024416  | 0.283669417 | 0.283669417 | -5.050946913 |
| 1446977_at   | 0.104668565  | 3.699940116 | 1.136972932  | 0.283689886 | 0.283689886 | -5.050995842 |
| 1451848_a_at | 0.081957276  | 8.080723369 | 1.136948374  | 0.28369965  | 0.28369965  | -5.051019182 |
| 1421541_a_at | -0.090193116 | 5.649937451 | -1.13684163  | 0.283742093 | 0.283742093 | -5.051120624 |
| 1454240_at   | 0.137937051  | 5.02413798  | 1.136774367  | 0.283768841 | 0.283768841 | -5.051184543 |
| 1420780_at   | -0.125486368 | 5.657929924 | -1.136745341 | 0.283780384 | 0.283780384 | -5.051212124 |
| 1416611_at   | -0.097084159 | 8.78884259  | -1.136702325 | 0.283797491 | 0.283797491 | -5.051253    |
| 1459462_at   | 0.093327214  | 5.769131071 | 1.136524994  | 0.283868023 | 0.283868023 | -5.051421491 |
| 1448247_at   | 0.134085306  | 7.456632695 | 1.136457471  | 0.283894884 | 0.283894884 | -5.051485644 |
| 1453526_at   | -0.079766089 | 3.278030814 | -1.136453848 | 0.283896325 | 0.283896325 | -5.051489086 |
| 1424118_a_at | 0.09409249   | 9.411084583 | 1.136451662  | 0.283897194 | 0.283897194 | -5.051491163 |
| 1431398_at   | 0.068731916  | 4.18443725  | 1.136418615  | 0.283910341 | 0.283910341 | -5.051522559 |
| 1452131_at   | 0.116553354  | 5.334362176 | 1.136252078  | 0.283976601 | 0.283976601 | -5.051680768 |
| 1456207_at   | 0.173811042  | 5.184427649 | 1.136131795  | 0.284024465 | 0.284024465 | -5.051795025 |
| 1450170_x_at | -0.091032941 | 4.012021949 | -1.13612413  | 0.284027515 | 0.284027515 | -5.051802306 |
| 1445179_at   | 0.09306368   | 3.278137776 | 1.136101488  | 0.284036526 | 0.284036526 | -5.051823813 |
| 1431624_a_at | 0.094301582  | 5.075796995 | 1.136080775  | 0.284044769 | 0.284044769 | -5.051843487 |



|              |              |             |              |             |             |              |
|--------------|--------------|-------------|--------------|-------------|-------------|--------------|
| 1427328_a_at | -0.234100627 | 5.92209495  | -1.135912589 | 0.284111709 | 0.284111709 | -5.052003228 |
| 1456077_x_at | 0.07828314   | 6.950082849 | 1.135896187  | 0.284118238 | 0.284118238 | -5.052018805 |
| 1431814_at   | 0.122597989  | 4.886382639 | 1.135878447  | 0.2841253   | 0.2841253   | -5.052035653 |
| 1437212_at   | 0.151504553  | 6.067366797 | 1.135831068  | 0.28414416  | 0.28414416  | -5.052080648 |
| 1416067_at   | 0.118177492  | 8.957389981 | 1.135801491  | 0.284155934 | 0.284155934 | -5.052108737 |
| 1428719_at   | -0.124564298 | 4.38167121  | -1.135788195 | 0.284161228 | 0.284161228 | -5.052121364 |
| 1445871_at   | -0.07574143  | 5.407444367 | -1.135779325 | 0.284164759 | 0.284164759 | -5.052129788 |
| 1436205_at   | 0.085289121  | 5.094020327 | 1.135723277  | 0.284187073 | 0.284187073 | -5.052183012 |
| 1459725_s_at | -0.138050751 | 4.252211694 | -1.135696124 | 0.284197884 | 0.284197884 | -5.052208798 |
| 1416369_at   | -0.071509541 | 9.224948975 | -1.135517241 | 0.284269112 | 0.284269112 | -5.052378655 |
| 1452824_at   | 0.16002537   | 5.798753983 | 1.135451916  | 0.284295127 | 0.284295127 | -5.05244068  |
| 1457335_at   | 0.105634821  | 3.498949001 | 1.135396684  | 0.284317124 | 0.284317124 | -5.052493119 |
| 1456044_at   | -0.087302084 | 3.87607113  | -1.135358989 | 0.284332137 | 0.284332137 | -5.052528907 |
| 1456364_at   | -0.112421274 | 5.40546176  | -1.135354227 | 0.284334034 | 0.284334034 | -5.052533428 |
| 1427756_x_at | -0.091931173 | 4.296616779 | -1.13534918  | 0.284336044 | 0.284336044 | -5.05253822  |
| 1422670_at   | 0.079010589  | 7.593545233 | 1.135314563  | 0.284349833 | 0.284349833 | -5.052571085 |
| 1458442_at   | 0.089959256  | 3.491937942 | 1.135131768  | 0.28442265  | 0.28442265  | -5.052744615 |
| 1417294_at   | -0.079410053 | 8.33448304  | -1.134954324 | 0.284493349 | 0.284493349 | -5.052913046 |
| 1424300_at   | 0.094660823  | 8.130021324 | 1.134884412  | 0.284521208 | 0.284521208 | -5.052979401 |
| 1450658_at   | -0.109959217 | 5.770915609 | -1.134833334 | 0.284541564 | 0.284541564 | -5.05302788  |
| 1431845_at   | 0.09040054   | 3.437650549 | 1.134783811  | 0.284561301 | 0.284561301 | -5.053074881 |
| 1429929_at   | -0.074294383 | 4.102131014 | -1.134781571 | 0.284562193 | 0.284562193 | -5.053077006 |
| 1450227_at   | 0.116716507  | 7.277541916 | 1.134743508  | 0.284577364 | 0.284577364 | -5.053113129 |
| 1418544_at   | -0.116769385 | 7.087459206 | -1.134652552 | 0.284613618 | 0.284613618 | -5.053199447 |
| 1421662_a_at | -0.069504124 | 9.529448876 | -1.134530328 | 0.28466234  | 0.28466234  | -5.053315429 |
| 1439889_at   | -0.106743281 | 5.409590518 | -1.134519512 | 0.284666652 | 0.284666652 | -5.053325692 |
| 1460484_at   | 0.076517161  | 4.989014882 | 1.134460473  | 0.284690189 | 0.284690189 | -5.053381713 |
| 1418120_at   | 0.115136592  | 7.156832374 | 1.134387121  | 0.284719435 | 0.284719435 | -5.053451311 |
| 1416112_at   | -0.080179335 | 10.69592433 | -1.134340972 | 0.284737836 | 0.284737836 | -5.053495097 |
| 1440582_at   | 0.220870162  | 4.21220653  | 1.134319753  | 0.284746297 | 0.284746297 | -5.053515229 |
| 1453819_x_at | 0.091808935  | 7.877951198 | 1.13426086   | 0.284769782 | 0.284769782 | -5.053571104 |
| 1448700_at   | 0.087350963  | 6.456156618 | 1.134147972  | 0.284814802 | 0.284814802 | -5.0536782   |
| 1447308_at   | 0.125394345  | 4.581767253 | 1.134026984  | 0.284863058 | 0.284863058 | -5.053792973 |
| 1432641_at   | -0.107162547 | 4.107087539 | -1.133995167 | 0.28487575  | 0.28487575  | -5.053823154 |
| 1422008_a_at | 0.194338841  | 4.507729313 | 1.133975228  | 0.284883703 | 0.284883703 | -5.053842067 |
| 1436232_a_at | -0.085486649 | 7.222415568 | -1.133963636 | 0.284888328 | 0.284888328 | -5.053853064 |
| 1432387_at   | -0.124152674 | 3.64813323  | -1.13387123  | 0.284925191 | 0.284925191 | -5.053940712 |
| 1458893_at   | -0.10049337  | 4.605042363 | -1.133719497 | 0.28498573  | 0.28498573  | -5.054084623 |
| 1460587_at   | -0.097084184 | 5.235838492 | -1.133659854 | 0.285009529 | 0.285009529 | -5.054141188 |
| 1417484_at   | -0.105498777 | 12.54810188 | -1.133648001 | 0.285014259 | 0.285014259 | -5.054152429 |
| 1452139_at   | 0.093185555  | 5.812253838 | 1.133600899  | 0.285033056 | 0.285033056 | -5.054197099 |
| 1418981_at   | -0.144437151 | 4.74491094  | -1.133488269 | 0.285078005 | 0.285078005 | -5.054303905 |
| 1449906_at   | -0.108169476 | 4.104861808 | -1.133453137 | 0.285092027 | 0.285092027 | -5.054337219 |
| 1429185_at   | 0.092861893  | 8.33857544  | 1.133345485  | 0.285134997 | 0.285134997 | -5.054439296 |
| 1450947_at   | -0.193175385 | 6.268814971 | -1.133225586 | 0.285182862 | 0.285182862 | -5.054552976 |
| 1450852_s_at | 0.09773508   | 10.00426295 | 1.133174757  | 0.285203155 | 0.285203155 | -5.054601168 |
| 1420024_s_at | 0.090720078  | 8.882529865 | 1.133128358  | 0.285221681 | 0.285221681 | -5.054645157 |
| 1435300_at   | 0.114068162  | 5.855994895 | 1.133123561  | 0.285223596 | 0.285223596 | -5.054649704 |
| 1430460_at   | -0.135250289 | 5.099175405 | -1.133113457 | 0.28522763  | 0.28522763  | -5.054659283 |
| 1422559_at   | -0.091278811 | 9.826333331 | -1.133018927 | 0.285265377 | 0.285265377 | -5.054748899 |
| 1421772_a_at | 0.084404643  | 11.11796062 | 1.132917019  | 0.285306073 | 0.285306073 | -5.054845501 |
| 1454416_at   | -0.119328765 | 5.872363017 | -1.132911049 | 0.285308457 | 0.285308457 | -5.05485116  |
| 1429783_at   | -0.191493906 | 6.525133151 | -1.132859476 | 0.285329055 | 0.285329055 | -5.054900047 |

|              |              |             |              |             |             |              |
|--------------|--------------|-------------|--------------|-------------|-------------|--------------|
| 1454584_at   | 0.097685315  | 4.237926053 | 1.132783539  | 0.285359385 | 0.285359385 | -5.054972024 |
| 1426422_at   | 0.105769894  | 7.122400518 | 1.132769055  | 0.28536517  | 0.28536517  | -5.054985753 |
| 1429276_at   | -0.078739206 | 4.567669438 | -1.132705069 | 0.285390729 | 0.285390729 | -5.055046399 |
| 1426442_at   | 0.08320051   | 4.262271273 | 1.132699102  | 0.285393113 | 0.285393113 | -5.055052055 |
| 1421287_a_at | 0.093345456  | 7.404155209 | 1.132697646  | 0.285393695 | 0.285393695 | -5.055053434 |
| 1436052_at   | 0.098661933  | 7.278962086 | 1.132683752  | 0.285399245 | 0.285399245 | -5.055066602 |
| 1441476_at   | -0.096690279 | 3.640596698 | -1.132679853 | 0.285400803 | 0.285400803 | -5.055070298 |
| 1424125_at   | -0.104931792 | 4.62402851  | -1.132665647 | 0.285406477 | 0.285406477 | -5.055083762 |
| 1446762_at   | -0.100844341 | 4.332056907 | -1.132607454 | 0.285429725 | 0.285429725 | -5.055138914 |
| 1449907_at   | -0.101016706 | 4.457894905 | -1.132538457 | 0.285457291 | 0.285457291 | -5.055204304 |
| 1455023_at   | -0.120938092 | 4.697186587 | -1.132464942 | 0.285486664 | 0.285486664 | -5.055273971 |
| 1449490_at   | 0.069430154  | 7.927206946 | 1.132406419  | 0.285510049 | 0.285510049 | -5.055329428 |
| 1456485_at   | 0.113087258  | 8.134526962 | 1.132389966  | 0.285516623 | 0.285516623 | -5.055345019 |
| 1433902_at   | 0.167922757  | 4.981384553 | 1.132265034  | 0.28556655  | 0.28556655  | -5.0554634   |
| 1444732_at   | 0.079959478  | 4.336420425 | 1.13223503   | 0.285578541 | 0.285578541 | -5.055491829 |
| 1451826_at   | -0.117794497 | 4.426981626 | -1.13212344  | 0.285623143 | 0.285623143 | -5.055597557 |
| 1424838_at   | 0.209163191  | 5.961907915 | 1.132099439  | 0.285632737 | 0.285632737 | -5.055620296 |
| 1437586_at   | -0.073520869 | 8.097820307 | -1.132095684 | 0.285634238 | 0.285634238 | -5.055623854 |
| 1415744_at   | 0.095403586  | 10.08592191 | 1.132061849  | 0.285647763 | 0.285647763 | -5.05565591  |
| 1421728_at   | 0.114296514  | 3.919702961 | 1.132007349  | 0.28566955  | 0.28566955  | -5.055707542 |
| 1429853_at   | -0.080111493 | 3.845696447 | -1.13199751  | 0.285673483 | 0.285673483 | -5.055716863 |
| 1426725_s_at | 0.103996181  | 8.767238768 | 1.131995715  | 0.285674201 | 0.285674201 | -5.055718563 |
| 1417885_at   | -0.113141099 | 4.305945201 | -1.131987692 | 0.285677408 | 0.285677408 | -5.055726164 |
| 1443064_at   | -0.083146595 | 3.67120048  | -1.131967281 | 0.285685568 | 0.285685568 | -5.0557455   |
| 1441416_at   | -0.093483925 | 3.881815398 | -1.131878531 | 0.285721051 | 0.285721051 | -5.055829574 |
| 1432819_at   | -0.08465479  | 3.963355653 | -1.131801652 | 0.285751791 | 0.285751791 | -5.055902398 |
| 1420708_at   | -0.120737027 | 6.436079205 | -1.13177796  | 0.285761264 | 0.285761264 | -5.05592484  |
| 1444279_at   | 0.427976815  | 6.399590997 | 1.131759082  | 0.285768813 | 0.285768813 | -5.055942722 |
| 1424508_at   | 0.090714649  | 9.246543945 | 1.13173673   | 0.285777751 | 0.285777751 | -5.055963894 |
| 1449631_at   | 0.073897308  | 6.205941226 | 1.131697463  | 0.285793454 | 0.285793454 | -5.056001088 |
| 1441520_at   | 0.186635892  | 7.002621878 | 1.131537783  | 0.285857317 | 0.285857317 | -5.056152324 |
| 1452544_x_at | -0.120868888 | 5.560337571 | -1.131312313 | 0.285947511 | 0.285947511 | -5.056365847 |
| 1427848_at   | 0.0969183    | 3.476528373 | 1.131308495  | 0.285949039 | 0.285949039 | -5.056369462 |
| 1448843_at   | -0.086199464 | 7.982103853 | -1.131278112 | 0.285961194 | 0.285961194 | -5.056398233 |
| 1442748_at   | -0.108541133 | 4.469863352 | -1.131257882 | 0.285969288 | 0.285969288 | -5.056417389 |
| 1433773_at   | -0.085115422 | 7.290638371 | -1.131092617 | 0.286035417 | 0.286035417 | -5.056573871 |
| 1443245_at   | -0.121962877 | 4.059568871 | -1.131087254 | 0.286037563 | 0.286037563 | -5.056578949 |
| 1460432_a_at | 0.071272733  | 12.58854429 | 1.130787703  | 0.286157456 | 0.286157456 | -5.056862538 |
| 1417814_at   | -0.092088948 | 3.631105185 | -1.130657447 | 0.286209602 | 0.286209602 | -5.056985836 |
| 1424261_at   | 0.068081704  | 8.197460734 | 1.130601689  | 0.286231926 | 0.286231926 | -5.057038612 |
| 1422234_at   | 0.092682128  | 5.890451018 | 1.130524642  | 0.286262776 | 0.286262776 | -5.057111536 |
| 1437478_s_at | -0.274897637 | 9.714708442 | -1.130495149 | 0.286274586 | 0.286274586 | -5.05713945  |
| 1433686_at   | -0.158869596 | 7.85292059  | -1.13035188  | 0.286331961 | 0.286331961 | -5.057275039 |
| 1432738_at   | 0.083563055  | 4.32702363  | 1.130214267  | 0.286387079 | 0.286387079 | -5.057405265 |
| 1449290_at   | 0.12123789   | 6.226931327 | 1.130197625  | 0.286393746 | 0.286393746 | -5.057421013 |
| 1460164_at   | 0.086306991  | 8.825781464 | 1.130117833  | 0.286425709 | 0.286425709 | -5.057496515 |
| 1421113_at   | 0.079072433  | 4.443056193 | 1.130010266  | 0.286468803 | 0.286468803 | -5.057598293 |
| 1449515_at   | 0.130536443  | 9.423474874 | 1.129985403  | 0.286478765 | 0.286478765 | -5.057621816 |
| 1457183_at   | -0.093316611 | 3.407811761 | -1.129952295 | 0.28649203  | 0.28649203  | -5.057653141 |
| 1454134_at   | -0.075647406 | 3.64451956  | -1.129928006 | 0.286501762 | 0.286501762 | -5.05767612  |
| 1435315_s_at | 0.12173701   | 9.294830287 | 1.129811524  | 0.286548438 | 0.286548438 | -5.05778632  |
| 1439571_at   | 0.095630159  | 3.981202518 | 1.129743433  | 0.286575726 | 0.286575726 | -5.057850735 |
| 1417254_at   | 0.110486478  | 7.685197573 | 1.129712133  | 0.28658827  | 0.28658827  | -5.057880344 |

|              |              |             |              |             |             |              |
|--------------|--------------|-------------|--------------|-------------|-------------|--------------|
| 1453703_at   | -0.087888431 | 4.451078269 | -1.129695997 | 0.286594737 | 0.286594737 | -5.057895607 |
| 1424904_at   | -0.1222298   | 6.595178164 | -1.129645909 | 0.286614812 | 0.286614812 | -5.057942988 |
| 1421123_at   | -0.09394504  | 4.250845951 | -1.129522901 | 0.286664119 | 0.286664119 | -5.05805934  |
| 1424310_at   | 0.130526013  | 5.415442759 | 1.129482122  | 0.286680466 | 0.286680466 | -5.05809791  |
| 1429135_at   | -0.392822721 | 6.285832539 | -1.129470763 | 0.28668502  | 0.28668502  | -5.058108654 |
| 1449977_at   | -0.112749643 | 5.09981474  | -1.129465634 | 0.286687076 | 0.286687076 | -5.058113505 |
| 1453581_at   | -0.107709403 | 7.873395492 | -1.129402847 | 0.286712248 | 0.286712248 | -5.058172889 |
| 1423758_at   | 0.095916103  | 10.67430943 | 1.129199065  | 0.286793957 | 0.286793957 | -5.058365609 |
| 1453238_s_at | 0.147209176  | 8.018082627 | 1.129194916  | 0.286795621 | 0.286795621 | -5.058369533 |
| 1431276_at   | -0.082158732 | 4.173028288 | -1.129156951 | 0.286810845 | 0.286810845 | -5.058405434 |
| 1430007_a_at | -0.084366097 | 3.868956922 | -1.129104129 | 0.286832029 | 0.286832029 | -5.058455383 |
| 1431429_a_at | -0.088432063 | 8.732073028 | -1.12907465  | 0.286843851 | 0.286843851 | -5.058483258 |
| 1459562_at   | 0.089408259  | 5.456569248 | 1.12899705   | 0.286874975 | 0.286874975 | -5.058556633 |
| 1456842_at   | -0.077672017 | 3.181806783 | -1.128974046 | 0.286884202 | 0.286884202 | -5.058578383 |
| 1454322_at   | 0.108914125  | 3.880984532 | 1.128892907  | 0.286916749 | 0.286916749 | -5.0586551   |
| 1426216_at   | -0.078300454 | 9.136850083 | -1.128808929 | 0.286950438 | 0.286950438 | -5.058734496 |
| 1447881_x_at | 0.106676691  | 5.73928238  | 1.128807095  | 0.286951174 | 0.286951174 | -5.05873623  |
| 1417721_s_at | 0.106420761  | 6.776788189 | 1.128800704  | 0.286953738 | 0.286953738 | -5.058742273 |
| 1417574_at   | -0.086891438 | 10.39795974 | -1.128790864 | 0.286957685 | 0.286957685 | -5.058751575 |
| 1449422_at   | -0.255540457 | 6.880463646 | -1.128732051 | 0.286981281 | 0.286981281 | -5.058807176 |
| 1423362_at   | -0.094053412 | 8.881871133 | -1.128683263 | 0.287000856 | 0.287000856 | -5.058853299 |
| 1456657_at   | 0.095446797  | 6.572859048 | 1.128606462  | 0.287031673 | 0.287031673 | -5.058925899 |
| 1455960_at   | 0.156769275  | 6.054090687 | 1.128465818  | 0.287088113 | 0.287088113 | -5.059058843 |
| 1456008_at   | 0.110684027  | 4.270873058 | 1.128364943  | 0.2871286   | 0.2871286   | -5.059154188 |
| 1448599_s_at | -0.13534974  | 7.092889352 | -1.128236978 | 0.287179966 | 0.287179966 | -5.059275129 |
| 1450450_at   | 0.129190238  | 4.569842861 | 1.128153927  | 0.287213307 | 0.287213307 | -5.059353616 |
| 1457759_at   | 0.083356778  | 5.45121527  | 1.128134404  | 0.287221145 | 0.287221145 | -5.059372065 |
| 1454174_a_at | 0.093438111  | 7.95441515  | 1.128133069  | 0.287221681 | 0.287221681 | -5.059373326 |
| 1446200_at   | 0.131370251  | 3.748885091 | 1.128117874  | 0.287227781 | 0.287227781 | -5.059387686 |
| 1446831_at   | -0.094186468 | 3.415334338 | -1.12806579  | 0.287248693 | 0.287248693 | -5.059436904 |
| 1426466_s_at | -0.084712621 | 4.388931998 | -1.128060591 | 0.28725078  | 0.28725078  | -5.059441817 |
| 1430122_at   | -0.119811953 | 4.6968868   | -1.128033388 | 0.287261703 | 0.287261703 | -5.059467522 |
| 1441081_a_at | 0.098311279  | 10.73520793 | 1.127993834  | 0.287277585 | 0.287277585 | -5.059504898 |
| 1421119_at   | -0.096203545 | 3.742541635 | -1.127961827 | 0.287290437 | 0.287290437 | -5.059535142 |
| 1448620_at   | 0.266212765  | 7.446992256 | 1.127940066  | 0.287299175 | 0.287299175 | -5.059555704 |
| 1436509_at   | -0.086350554 | 9.067148517 | -1.127933348 | 0.287301873 | 0.287301873 | -5.059562052 |
| 1429749_at   | -0.099494197 | 7.010956245 | -1.127908825 | 0.287311721 | 0.287311721 | -5.059585223 |
| 1425110_at   | -0.115328685 | 6.683452232 | -1.127724926 | 0.287385578 | 0.287385578 | -5.059758973 |
| 1449835_at   | 0.0814903    | 3.539322275 | 1.127711335  | 0.287391037 | 0.287391037 | -5.059771813 |
| 1446356_at   | -0.086262162 | 3.800895137 | -1.127655792 | 0.287413347 | 0.287413347 | -5.059824286 |
| 1426038_at   | 0.096747858  | 3.971047125 | 1.127613968  | 0.287430148 | 0.287430148 | -5.059863797 |
| 1421311_at   | -0.10427054  | 7.333188087 | -1.127608794 | 0.287432226 | 0.287432226 | -5.059868685 |
| 1430295_at   | 0.102932467  | 6.816350888 | 1.127558441  | 0.287452454 | 0.287452454 | -5.059916252 |
| 1431282_at   | -0.077699264 | 3.857642725 | -1.127553368 | 0.287454493 | 0.287454493 | -5.059921045 |
| 1427284_a_at | -0.1425306   | 7.869871138 | -1.127494955 | 0.28747796  | 0.28747796  | -5.059976223 |
| 1425429_s_at | 0.09725777   | 5.918751735 | 1.127411131  | 0.287511638 | 0.287511638 | -5.060055402 |
| 1445019_at   | 0.108965881  | 3.292168403 | 1.127385113  | 0.287522092 | 0.287522092 | -5.060079978 |
| 1416839_at   | 0.08061728   | 3.237531114 | 1.127362165  | 0.287531313 | 0.287531313 | -5.060101653 |
| 1451070_at   | 0.082215582  | 10.26149838 | 1.12732182   | 0.287547525 | 0.287547525 | -5.06013976  |
| 1420519_a_at | 0.093110619  | 6.785639198 | 1.127265567  | 0.28757013  | 0.28757013  | -5.06019289  |
| 1446306_at   | 0.093527448  | 3.398904416 | 1.127181896  | 0.287603756 | 0.287603756 | -5.060271913 |
| 1451607_at   | -0.091965179 | 5.886021948 | -1.127178479 | 0.287605129 | 0.287605129 | -5.060275141 |
| 1439039_at   | -0.133424544 | 3.976419722 | -1.127012758 | 0.287671739 | 0.287671739 | -5.060431643 |

|              |              |             |              |             |             |              |
|--------------|--------------|-------------|--------------|-------------|-------------|--------------|
| 1419197_x_at | -0.081969662 | 4.186068212 | -1.126950226 | 0.287696876 | 0.287696876 | -5.060490692 |
| 1418882_at   | -0.152692433 | 4.335903202 | -1.126929883 | 0.287705054 | 0.287705054 | -5.060509902 |
| 1417177_at   | -0.12290778  | 9.099191448 | -1.126554256 | 0.287856091 | 0.287856091 | -5.060864552 |
| 1449705_x_at | -0.083624487 | 8.983879668 | -1.126549045 | 0.287858186 | 0.287858186 | -5.060869471 |
| 1428134_at   | -0.093535777 | 8.963697082 | -1.126452199 | 0.287897138 | 0.287897138 | -5.060960894 |
| 1421707_at   | -0.110994099 | 4.082262321 | -1.126449473 | 0.287898234 | 0.287898234 | -5.060963468 |
| 1450837_at   | -0.087444728 | 4.081278167 | -1.126449392 | 0.287898267 | 0.287898267 | -5.060963544 |
| 1445109_at   | -0.093662446 | 4.177521498 | -1.126361651 | 0.28793356  | 0.28793356  | -5.061046368 |
| 1457504_at   | -0.07709916  | 4.152143487 | -1.126238788 | 0.287982986 | 0.287982986 | -5.061162336 |
| 1431767_at   | -0.104023521 | 4.577410813 | -1.126224167 | 0.287988869 | 0.287988869 | -5.061176136 |
| 1454662_at   | -0.098087196 | 7.385825185 | -1.1262017   | 0.287997908 | 0.287997908 | -5.061197341 |
| 1425782_at   | -0.10571308  | 5.191441043 | -1.12620082  | 0.287998262 | 0.287998262 | -5.061198172 |
| 1447565_at   | -0.080567716 | 3.255973179 | -1.126200144 | 0.287998534 | 0.287998534 | -5.06119881  |
| 1438687_at   | -0.098640475 | 3.690248518 | -1.125901716 | 0.288118621 | 0.288118621 | -5.061480446 |
| 1420090_at   | -0.086769192 | 4.136400279 | -1.125876265 | 0.288128864 | 0.288128864 | -5.061504462 |
| 1448029_at   | 0.131617663  | 8.193000712 | 1.125779094  | 0.288167975 | 0.288167975 | -5.061596152 |
| 1432855_at   | 0.074249781  | 5.712618167 | 1.125775355  | 0.28816948  | 0.28816948  | -5.061599681 |
| 1441980_at   | 0.089068387  | 8.258115992 | 1.125663756  | 0.288214403 | 0.288214403 | -5.061704978 |
| 1424689_at   | -0.084652133 | 3.444298214 | -1.125587147 | 0.288245245 | 0.288245245 | -5.061777257 |
| 1424396_a_at | -0.129168437 | 8.074764368 | -1.125586863 | 0.28824536  | 0.28824536  | -5.061777525 |
| 1441174_a_at | -0.138489746 | 4.949701316 | -1.125544269 | 0.288262509 | 0.288262509 | -5.06181771  |
| 1439757_s_at | 0.127705197  | 7.920931247 | 1.125535359  | 0.288266096 | 0.288266096 | -5.061826115 |
| 1441036_at   | -0.08443205  | 4.21912082  | -1.125496166 | 0.288281876 | 0.288281876 | -5.06186309  |
| 1453930_at   | -0.101357531 | 3.277235037 | -1.125436054 | 0.288306081 | 0.288306081 | -5.061919798 |
| 1418465_at   | -0.101222596 | 5.996699503 | -1.125364234 | 0.288335001 | 0.288335001 | -5.061987548 |
| 1429942_at   | 0.08470674   | 7.513748898 | 1.125350702  | 0.288340451 | 0.288340451 | -5.062000314 |
| 1450995_at   | -0.095386996 | 4.557090839 | -1.125307931 | 0.288357676 | 0.288357676 | -5.062040659 |
| 1444515_at   | 0.087256581  | 6.334969223 | 1.125200541  | 0.288400927 | 0.288400927 | -5.062141954 |
| 1433240_at   | -0.082096141 | 4.143023268 | -1.125147331 | 0.288422359 | 0.288422359 | -5.062192142 |
| 1423677_at   | -0.099918757 | 11.2245778  | -1.125068897 | 0.288453954 | 0.288453954 | -5.062266118 |
| 1431494_at   | 0.1117704    | 3.695210572 | 1.124991487  | 0.288485138 | 0.288485138 | -5.062339123 |
| 1420549_at   | -0.108716072 | 4.422857493 | -1.12491616  | 0.288515486 | 0.288515486 | -5.062410161 |
| 1430944_at   | -0.087024721 | 4.678703061 | -1.124814656 | 0.288556384 | 0.288556384 | -5.062505881 |
| 1417858_at   | -0.118323358 | 4.79963557  | -1.124803734 | 0.288560785 | 0.288560785 | -5.06251618  |
| 1427666_a_at | -0.110073473 | 4.428481641 | -1.124594465 | 0.28864512  | 0.28864512  | -5.062713501 |
| 1432465_at   | -0.116796083 | 4.201205942 | -1.124474361 | 0.28869353  | 0.28869353  | -5.062826736 |
| 1437793_at   | -0.076389312 | 7.374696315 | -1.124471371 | 0.288694735 | 0.288694735 | -5.062829555 |
| 1423527_at   | 0.096272187  | 3.312630312 | 1.124310126  | 0.288759738 | 0.288759738 | -5.062981563 |
| 1418812_a_at | -0.117305427 | 4.621212986 | -1.124291971 | 0.288767057 | 0.288767057 | -5.062998677 |
| 1451994_s_at | 0.080989436  | 10.71528263 | 1.124267818  | 0.288776796 | 0.288776796 | -5.063021446 |
| 1415678_at   | 0.07309801   | 9.870770922 | 1.12411877   | 0.288836895 | 0.288836895 | -5.063161938 |
| 1422151_at   | -0.084492916 | 4.069736479 | -1.124002242 | 0.288883888 | 0.288883888 | -5.063271767 |
| 1455891_at   | 0.09519461   | 3.714063466 | 1.123963867  | 0.288899365 | 0.288899365 | -5.063307935 |
| 1436808_x_at | 0.086787692  | 10.61279621 | 1.123945245  | 0.288906876 | 0.288906876 | -5.063325485 |
| 1425257_at   | -0.085643416 | 3.469644441 | -1.123896764 | 0.28892643  | 0.28892643  | -5.063371175 |
| 1459377_at   | -0.102736688 | 4.206986689 | -1.123855909 | 0.288942909 | 0.288942909 | -5.063409676 |
| 1427800_at   | -0.137575603 | 5.568979433 | -1.123748346 | 0.288986299 | 0.288986299 | -5.063511039 |
| 1420145_at   | -0.088343659 | 3.69848408  | -1.12370527  | 0.289003677 | 0.289003677 | -5.063551631 |
| 1454281_at   | 0.076764197  | 3.848254196 | 1.12370131   | 0.289005275 | 0.289005275 | -5.063555362 |
| 1449216_at   | 0.076595112  | 4.342156404 | 1.123688216  | 0.289010557 | 0.289010557 | -5.0635677   |
| 1424917_a_at | -0.143343913 | 7.013683718 | -1.123615324 | 0.289039966 | 0.289039966 | -5.063636385 |
| 1424791_a_at | -0.135822044 | 8.163345967 | -1.123602047 | 0.289045323 | 0.289045323 | -5.063648894 |
| 1435967_s_at | -0.06918187  | 9.557029909 | -1.123521656 | 0.289077761 | 0.289077761 | -5.06372464  |

|              |              |             |              |             |             |              |
|--------------|--------------|-------------|--------------|-------------|-------------|--------------|
| 1437245_at   | -0.099028731 | 3.687948049 | -1.123497758 | 0.289087404 | 0.289087404 | -5.063747156 |
| 1443270_at   | -0.110512316 | 7.0998561   | -1.123444445 | 0.289108918 | 0.289108918 | -5.063797385 |
| 1446586_at   | -0.083905283 | 3.836896272 | -1.123417648 | 0.289119732 | 0.289119732 | -5.063822631 |
| 1453919_at   | -0.130728699 | 5.353593716 | -1.123398558 | 0.289127436 | 0.289127436 | -5.063840616 |
| 1439336_at   | 0.183317364  | 7.552429087 | 1.123396713  | 0.289128181 | 0.289128181 | -5.063842354 |
| 1447380_at   | -0.070228188 | 3.202673409 | -1.123304341 | 0.289165461 | 0.289165461 | -5.063929376 |
| 1423301_at   | -0.076024038 | 10.35450897 | -1.123071049 | 0.289259633 | 0.289259633 | -5.064149133 |
| 1418149_at   | 0.083361494  | 4.980913803 | 1.123050731  | 0.289267836 | 0.289267836 | -5.064168271 |
| 1454456_at   | -0.119452526 | 3.75599611  | -1.122887626 | 0.289333691 | 0.289333691 | -5.064321891 |
| 1417671_at   | -0.088121114 | 6.501893879 | -1.122853475 | 0.289347482 | 0.289347482 | -5.064354054 |
| 1432908_at   | -0.102984764 | 3.433505922 | -1.122832061 | 0.289356129 | 0.289356129 | -5.064374221 |
| 1431553_at   | 0.101763397  | 4.254476486 | 1.122764377  | 0.289383462 | 0.289383462 | -5.064437963 |
| 1450261_a_at | -0.112067507 | 3.795630235 | -1.122760436 | 0.289385054 | 0.289385054 | -5.064441674 |
| 1446627_at   | 0.172118496  | 7.067981125 | 1.122718208  | 0.289402108 | 0.289402108 | -5.06448144  |
| 1438811_at   | 0.127651228  | 5.43045961  | 1.122689155  | 0.289413842 | 0.289413842 | -5.064508799 |
| 1424274_at   | -0.099629756 | 10.44089564 | -1.122684082 | 0.28941589  | 0.28941589  | -5.064513575 |
| 1455405_at   | 0.184697555  | 5.366796167 | 1.122669017  | 0.289421975 | 0.289421975 | -5.064527762 |
| 1436301_at   | 0.082866973  | 7.514428559 | 1.12263849   | 0.289434305 | 0.289434305 | -5.064556508 |
| 1443112_at   | -0.078476038 | 6.665398179 | -1.122597133 | 0.28945101  | 0.28945101  | -5.064595451 |
| 1425781_a_at | -0.112388667 | 5.259102701 | -1.122580862 | 0.289457582 | 0.289457582 | -5.064610772 |
| 1459341_at   | 0.093507755  | 6.996614507 | 1.122463425  | 0.289505022 | 0.289505022 | -5.064721348 |
| 1418116_at   | 0.068150723  | 10.79219338 | 1.122346025  | 0.289552452 | 0.289552452 | -5.06483188  |
| 1438807_at   | 0.106535277  | 9.319228224 | 1.122310896  | 0.289566646 | 0.289566646 | -5.064864953 |
| 1457350_at   | -0.100363017 | 5.691543811 | -1.122186182 | 0.289617041 | 0.289617041 | -5.064982359 |
| 1417136_s_at | 0.181510558  | 8.891456919 | 1.122119256  | 0.289644087 | 0.289644087 | -5.06504536  |
| 1450689_at   | -0.072629634 | 3.432549103 | -1.1221083   | 0.289648514 | 0.289648514 | -5.065055673 |
| 1419378_a_at | -0.135510153 | 5.462832594 | -1.122106906 | 0.289649078 | 0.289649078 | -5.065056985 |
| 1433428_x_at | 0.153560406  | 9.19455195  | 1.12201549   | 0.289686025 | 0.289686025 | -5.065143034 |
| 1435484_at   | -0.08211433  | 9.263146046 | -1.122013122 | 0.289686982 | 0.289686982 | -5.065145263 |
| 1449197_at   | 0.093675971  | 7.064122826 | 1.121871786  | 0.289744112 | 0.289744112 | -5.065278291 |
| 1428248_at   | -0.078765471 | 8.85347955  | -1.121844676 | 0.289755071 | 0.289755071 | -5.065303807 |
| 1447961_s_at | 0.072408702  | 8.102787838 | 1.121827037  | 0.289762202 | 0.289762202 | -5.065320408 |
| 1439720_at   | -0.069203969 | 5.471370489 | -1.121680675 | 0.289821376 | 0.289821376 | -5.065458149 |
| 1457163_at   | 0.138586756  | 6.865827463 | 1.121619578  | 0.28984608  | 0.28984608  | -5.065515644 |
| 1450499_at   | -0.099341417 | 4.556385169 | -1.121511711 | 0.2898897   | 0.2898897   | -5.065617146 |
| 1438941_x_at | -0.104405785 | 10.41144115 | -1.121493099 | 0.289897226 | 0.289897226 | -5.065634658 |
| 1426482_at   | 0.101576395  | 10.28789264 | 1.121437281  | 0.2899198   | 0.2899198   | -5.065687179 |
| 1433617_s_at | -0.103305129 | 8.390714259 | -1.121408463 | 0.289931456 | 0.289931456 | -5.065714294 |
| 1428701_at   | 0.108824596  | 5.27180875  | 1.121324731  | 0.289965323 | 0.289965323 | -5.065793075 |
| 1423922_s_at | 0.094587929  | 8.625537882 | 1.121311464  | 0.289970689 | 0.289970689 | -5.065805557 |
| 1428173_at   | 0.110656047  | 7.58557373  | 1.121202114  | 0.290014923 | 0.290014923 | -5.065908432 |
| 1424644_at   | 0.073637469  | 7.621739932 | 1.121199678  | 0.290015909 | 0.290015909 | -5.065910725 |
| 1448372_a_at | -0.080737263 | 11.15370528 | -1.121170434 | 0.290027739 | 0.290027739 | -5.065938235 |
| 1421639_at   | 0.097034848  | 3.491081935 | 1.12109717   | 0.29005738  | 0.29005738  | -5.066007157 |
| 1422317_a_at | 0.122596389  | 4.235573593 | 1.121090192  | 0.290060203 | 0.290060203 | -5.066013721 |
| 1450565_at   | -0.085282481 | 5.57036549  | -1.121088678 | 0.290060816 | 0.290060816 | -5.066015145 |
| 1459494_at   | 0.137718471  | 4.835259489 | 1.121061346  | 0.290071874 | 0.290071874 | -5.066040856 |
| 1445459_at   | -0.090136236 | 4.587774175 | -1.120907012 | 0.290134324 | 0.290134324 | -5.066186027 |
| 1438121_at   | -0.11947922  | 6.186391572 | -1.120840751 | 0.290161139 | 0.290161139 | -5.066248351 |
| 1451822_a_at | 0.099638939  | 6.435993171 | 1.120808076  | 0.290174362 | 0.290174362 | -5.066279082 |
| 1431280_at   | -0.104671912 | 6.531361514 | -1.120796289 | 0.290179133 | 0.290179133 | -5.066290168 |
| 1460421_at   | -0.083157522 | 5.130451101 | -1.120688151 | 0.290222901 | 0.290222901 | -5.06639187  |
| 1444551_at   | -0.102014122 | 3.617418719 | -1.12066881  | 0.29023073  | 0.29023073  | -5.066410059 |

|                  |              |             |              |             |             |              |
|------------------|--------------|-------------|--------------|-------------|-------------|--------------|
| 1460345_at       | 0.079912808  | 7.536003931 | 1.120668399  | 0.290230896 | 0.290230896 | -5.066410445 |
| 1458139_at       | -0.086955836 | 3.942612011 | -1.120571445 | 0.290270143 | 0.290270143 | -5.066501622 |
| 1434826_at       | 0.095680096  | 7.160089891 | 1.120551299  | 0.290278299 | 0.290278299 | -5.066520566 |
| 1430405_at       | 0.099253004  | 3.952327316 | 1.120441226  | 0.290322863 | 0.290322863 | -5.066624072 |
| 1447257_at       | -0.110450241 | 4.031294496 | -1.120418384 | 0.290332111 | 0.290332111 | -5.066645555 |
| 1426069_s_at     | -0.090277774 | 5.815705212 | -1.120406613 | 0.290336877 | 0.290336877 | -5.066656618 |
| 1451019_at       | -0.082705839 | 7.688452995 | -1.120403203 | 0.290338258 | 0.290338258 | -5.066659825 |
| 1433680_x_at     | 0.09825575   | 6.904398058 | 1.120392883  | 0.290342436 | 0.290342436 | -5.066669528 |
| 1441516_a_at     | -0.118262415 | 5.805567009 | -1.12032294  | 0.290370758 | 0.290370758 | -5.066735292 |
| 1432363_at       | 0.074601204  | 4.386376563 | 1.120230199  | 0.290408313 | 0.290408313 | -5.066822486 |
| 1425776_a_at     | -0.109010002 | 7.116006465 | -1.12020041  | 0.290420377 | 0.290420377 | -5.066850492 |
| 1454233_at       | 0.075821512  | 4.863169024 | 1.120124147  | 0.290451264 | 0.290451264 | -5.06692219  |
| 1441403_at       | 0.101416742  | 7.236334828 | 1.120119342  | 0.29045321  | 0.29045321  | -5.066926707 |
| 1454667_at       | -0.091749544 | 7.983748923 | -1.12007839  | 0.290469797 | 0.290469797 | -5.066965206 |
| 1457457_at       | 0.099099637  | 4.678121306 | 1.120002948  | 0.290500355 | 0.290500355 | -5.067036125 |
| 1443799_at       | -0.108342167 | 4.719384219 | -1.119862467 | 0.290557264 | 0.290557264 | -5.067168175 |
| 1440045_at       | -0.120498704 | 7.699147204 | -1.119812822 | 0.290577378 | 0.290577378 | -5.067214838 |
| 1439969_at       | 0.093333787  | 8.045045233 | 1.119779838  | 0.290590742 | 0.290590742 | -5.06724584  |
| 1439884_at       | 0.079144752  | 6.093600099 | 1.11965291   | 0.290642173 | 0.290642173 | -5.067365133 |
| 1439443_x_at     | 0.079670844  | 12.26504048 | 1.119615113  | 0.29065749  | 0.29065749  | -5.067400655 |
| 1455700_at       | -0.077082867 | 7.426446083 | -1.119542782 | 0.290686803 | 0.290686803 | -5.06746863  |
| 1441855_x_at     | -0.077165064 | 7.932597848 | -1.119507571 | 0.290701073 | 0.290701073 | -5.067501718 |
| 1415674_a_at     | 0.096753157  | 9.232938422 | 1.119500505  | 0.290703937 | 0.290703937 | -5.067508358 |
| 1454815_at       | 0.095130641  | 8.975812528 | 1.119309148  | 0.290781501 | 0.290781501 | -5.067688169 |
| 1456861_at       | -0.111732998 | 4.063110119 | -1.119284799 | 0.290791372 | 0.290791372 | -5.067711047 |
| 1446085_at       | -0.079975987 | 5.222967557 | -1.119208306 | 0.290822383 | 0.290822383 | -5.067782918 |
| 1435425_at       | -0.131657261 | 6.188078227 | -1.119168776 | 0.29083841  | 0.29083841  | -5.067820057 |
| 1433530_at       | 0.09918286   | 7.900437699 | 1.119084683  | 0.290872506 | 0.290872506 | -5.067899061 |
| 1423785_at       | 0.100083217  | 9.468124886 | 1.11899169   | 0.290910215 | 0.290910215 | -5.067986422 |
| 1449133_at       | -0.116366712 | 5.585399939 | -1.118889771 | 0.290951547 | 0.290951547 | -5.068082163 |
| 1428153_at       | 0.09480356   | 8.532119778 | 1.118881165  | 0.290955038 | 0.290955038 | -5.068090247 |
| 1421003_at       | -0.096019602 | 5.728083473 | -1.118860946 | 0.290963238 | 0.290963238 | -5.068109239 |
| 1453587_at       | -0.113238411 | 5.433872342 | -1.118859728 | 0.290963732 | 0.290963732 | -5.068110383 |
| 1434692_at       | 0.092761533  | 7.851588843 | 1.118801888  | 0.290987191 | 0.290987191 | -5.068164713 |
| 1440631_at       | -0.098608745 | 3.935432982 | -1.118795772 | 0.290989672 | 0.290989672 | -5.068170457 |
| 1458806_at       | -0.091256738 | 3.970333716 | -1.118739037 | 0.291012685 | 0.291012685 | -5.068223747 |
| 1442411_at       | 0.121121967  | 6.733561934 | 1.118721175  | 0.291019931 | 0.291019931 | -5.068240524 |
| 1431252_a_at     | 0.076463226  | 7.15598865  | 1.118692599  | 0.291031522 | 0.291031522 | -5.068267363 |
| 1452672_at       | 0.075752518  | 7.992067854 | 1.118656447  | 0.291046188 | 0.291046188 | -5.068301318 |
| 1429733_at       | -0.080894101 | 7.369382145 | -1.118594938 | 0.291071141 | 0.291071141 | -5.068359086 |
| 1446705_at       | 0.099403438  | 3.975985143 | 1.118534601  | 0.29109562  | 0.29109562  | -5.068415751 |
| 1433409_at       | -0.089972178 | 4.47598482  | -1.118527007 | 0.291098701 | 0.291098701 | -5.068422883 |
| 1448632_at       | 0.082502688  | 6.464356752 | 1.118457235  | 0.291127011 | 0.291127011 | -5.068488406 |
| 1434296_at       | 0.127296876  | 6.799597988 | 1.118383911  | 0.291156764 | 0.291156764 | -5.068557261 |
| 1438981_at       | -0.076289212 | 3.480835111 | -1.118364587 | 0.291164605 | 0.291164605 | -5.068575407 |
| 1451875_at       | -0.074649462 | 3.366175905 | -1.118362956 | 0.291165267 | 0.291165267 | -5.068576939 |
| 1435001_at       | 0.086269384  | 8.023683784 | 1.118348363  | 0.291171189 | 0.291171189 | -5.068590642 |
| 1446065_at       | 0.107957129  | 4.167453241 | 1.118325825  | 0.291180335 | 0.291180335 | -5.068611805 |
| 1435924_at       | 0.092037012  | 6.007200985 | 1.118286281  | 0.291196383 | 0.291196383 | -5.068648937 |
| AFFX-MURINE_b1_e | 0.097412125  | 11.36629865 | 1.118266735  | 0.291204316 | 0.291204316 | -5.068667289 |
| 1446314_at       | -0.08758851  | 5.018012653 | -1.118240037 | 0.291215151 | 0.291215151 | -5.068692358 |
| 1458426_at       | 0.233210224  | 5.544131004 | 1.118220926  | 0.291222908 | 0.291222908 | -5.068710302 |
| 1420857_at       | 0.077221916  | 7.190242391 | 1.118184009  | 0.291237891 | 0.291237891 | -5.068744964 |

|              |              |             |              |             |             |              |
|--------------|--------------|-------------|--------------|-------------|-------------|--------------|
| 1438435_at   | 0.097400053  | 7.573352358 | 1.118158377  | 0.291248295 | 0.291248295 | -5.06876903  |
| 1420158_s_at | 0.087352647  | 4.818550134 | 1.118148244  | 0.291252408 | 0.291252408 | -5.068778544 |
| 1443291_at   | -0.142924231 | 5.12767429  | -1.118074859 | 0.291282195 | 0.291282195 | -5.068847443 |
| 1437611_x_at | 0.078688444  | 8.57681229  | 1.117955727  | 0.291330558 | 0.291330558 | -5.068959285 |
| 1428665_at   | -0.087671943 | 4.964431881 | -1.117930778 | 0.291340686 | 0.291340686 | -5.068982705 |
| 1457850_at   | -0.08649538  | 3.373229531 | -1.117828646 | 0.291382153 | 0.291382153 | -5.069078579 |
| 1427063_at   | -0.131743656 | 4.580459485 | -1.117793488 | 0.291396429 | 0.291396429 | -5.069111581 |
| 1442726_s_at | 0.090071291  | 4.350001229 | 1.117767163  | 0.291407118 | 0.291407118 | -5.069136291 |
| 1420905_at   | 0.090726029  | 6.263758672 | 1.117755993  | 0.291411654 | 0.291411654 | -5.069146777 |
| 1422462_at   | -0.092649297 | 7.426881121 | -1.117726108 | 0.29142379  | 0.29142379  | -5.069174828 |
| 1448630_a_at | -0.09518594  | 9.833026177 | -1.117700504 | 0.291434188 | 0.291434188 | -5.069198861 |
| 1448564_at   | -0.123965822 | 8.760285031 | -1.117697048 | 0.291435591 | 0.291435591 | -5.069202104 |
| 1417984_at   | 0.117098525  | 7.254898841 | 1.117690701  | 0.291438168 | 0.291438168 | -5.069208062 |
| 1422397_a_at | 0.121017662  | 4.235149648 | 1.117672985  | 0.291445363 | 0.291445363 | -5.06922469  |
| 1451332_at   | 0.093076244  | 10.29711547 | 1.117591168  | 0.291478591 | 0.291478591 | -5.069301481 |
| 1435949_at   | -0.084761314 | 6.972260403 | -1.117567927 | 0.29148803  | 0.29148803  | -5.069323294 |
| 1430882_at   | -0.105337767 | 4.20040043  | -1.117475918 | 0.291525401 | 0.291525401 | -5.069409644 |
| 1442060_at   | 0.101729885  | 3.233772905 | 1.117473773  | 0.291526273 | 0.291526273 | -5.069411657 |
| 1444095_a_at | 0.085547634  | 3.566984204 | 1.117452036  | 0.291535102 | 0.291535102 | -5.069432057 |
| 1430733_at   | -0.09278141  | 3.207837955 | -1.117397223 | 0.291557368 | 0.291557368 | -5.069483495 |
| 1427579_at   | -0.112639881 | 4.761387959 | -1.117391646 | 0.291559634 | 0.291559634 | -5.06948873  |
| 1416430_at   | 0.1028816    | 9.27305856  | 1.117369805  | 0.291568506 | 0.291568506 | -5.069509225 |
| 1444754_at   | 0.099894651  | 4.772618165 | 1.117346415  | 0.291578008 | 0.291578008 | -5.069531174 |
| 1454695_at   | -0.137647635 | 7.178725014 | -1.117340807 | 0.291580287 | 0.291580287 | -5.069536437 |
| 1419604_at   | 0.100959617  | 5.104997486 | 1.117308729  | 0.291593318 | 0.291593318 | -5.069566538 |
| 1459570_at   | -0.085111824 | 3.115809585 | -1.117298621 | 0.291597425 | 0.291597425 | -5.069576023 |
| 1422037_at   | -0.120957611 | 6.093272364 | -1.117281972 | 0.291604189 | 0.291604189 | -5.069591646 |
| 1435516_x_at | -0.110892453 | 6.282315856 | -1.117169994 | 0.291649686 | 0.291649686 | -5.069696717 |
| 1457388_at   | -0.094079816 | 3.794731017 | -1.117167024 | 0.291650893 | 0.291650893 | -5.069699505 |
| 1421711_at   | 0.098155587  | 5.579039186 | 1.116981265  | 0.29172638  | 0.29172638  | -5.069873789 |
| 1460708_s_at | 0.096689785  | 11.81117198 | 1.116980345  | 0.291726754 | 0.291726754 | -5.069874652 |
| 1442087_at   | -0.091853977 | 8.048668374 | -1.116963457 | 0.291733618 | 0.291733618 | -5.069890495 |
| 1443800_at   | 0.083234372  | 5.243737162 | 1.116913324  | 0.291753993 | 0.291753993 | -5.069937528 |
| 1442898_at   | -0.112428199 | 4.152476902 | -1.116817913 | 0.291792774 | 0.291792774 | -5.070027032 |
| 1419241_a_at | -0.134193929 | 5.18691279  | -1.116805503 | 0.291797819 | 0.291797819 | -5.070038674 |
| 1441607_at   | 0.119811307  | 5.618346434 | 1.116723058  | 0.291831333 | 0.291831333 | -5.07011601  |
| 1433123_at   | -0.11507948  | 6.131612481 | -1.116721178 | 0.291832098 | 0.291832098 | -5.070117774 |
| 1451182_s_at | -0.097238791 | 8.210625974 | -1.116658149 | 0.291857722 | 0.291857722 | -5.070176895 |
| 1435721_at   | -0.078125177 | 5.933709603 | -1.116641827 | 0.291864357 | 0.291864357 | -5.070192204 |
| 1420671_x_at | 0.089125105  | 5.310666572 | 1.116614128  | 0.291875619 | 0.291875619 | -5.070218185 |
| 1438464_at   | 0.099726677  | 3.838369586 | 1.116600002  | 0.291881362 | 0.291881362 | -5.070231434 |
| 1418644_a_at | -0.08587289  | 9.014241708 | -1.116496571 | 0.291923418 | 0.291923418 | -5.070328443 |
| 1427831_s_at | 0.079583615  | 8.601907593 | 1.116469081  | 0.291934596 | 0.291934596 | -5.070354224 |
| 1423123_at   | 0.09522233   | 5.267435988 | 1.116460866  | 0.291937937 | 0.291937937 | -5.070361929 |
| 1419072_at   | -0.128856601 | 5.351375107 | -1.116431748 | 0.291949778 | 0.291949778 | -5.070389237 |
| 1457999_at   | -0.103121167 | 6.882140218 | -1.116390517 | 0.291966545 | 0.291966545 | -5.070427904 |
| 1436441_at   | 0.106198274  | 4.620470402 | 1.116362444  | 0.291977961 | 0.291977961 | -5.070454231 |
| 1420982_at   | -0.119216972 | 7.713720833 | -1.116318803 | 0.29199571  | 0.29199571  | -5.070495156 |
| 1442576_at   | -0.165259423 | 5.689056595 | -1.116314044 | 0.291997646 | 0.291997646 | -5.070499619 |
| 1446788_at   | 0.155299579  | 3.864015439 | 1.116310164  | 0.291999223 | 0.291999223 | -5.070503257 |
| 1429614_at   | 0.085056597  | 8.446771679 | 1.116287852  | 0.292008298 | 0.292008298 | -5.070524181 |
| 1445734_at   | -0.110534682 | 4.195946259 | -1.11624221  | 0.292026862 | 0.292026862 | -5.07056698  |
| 1416352_s_at | -0.07176985  | 10.51687147 | -1.116241144 | 0.292027296 | 0.292027296 | -5.07056798  |

|              |              |             |              |             |             |              |
|--------------|--------------|-------------|--------------|-------------|-------------|--------------|
| 1437067_at   | -0.097267315 | 8.24375046  | -1.116222487 | 0.292034884 | 0.292034884 | -5.070585475 |
| 1432388_at   | 0.072675644  | 4.109802384 | 1.116217681  | 0.292036839 | 0.292036839 | -5.070589981 |
| 1458896_at   | -0.077619057 | 5.260195227 | -1.116191274 | 0.292047581 | 0.292047581 | -5.070614743 |
| 1435874_at   | 0.0944697    | 8.141863164 | 1.116098923  | 0.292085147 | 0.292085147 | -5.070701336 |
| 1458036_at   | 0.092261012  | 3.580545782 | 1.116044004  | 0.292107489 | 0.292107489 | -5.070752829 |
| 1419283_s_at | 0.072174174  | 8.595388511 | 1.115866059  | 0.292179889 | 0.292179889 | -5.07091966  |
| 1458275_at   | -0.085945812 | 5.557458792 | -1.115807046 | 0.292203903 | 0.292203903 | -5.070974983 |
| 1456948_at   | -0.095148962 | 7.32560072  | -1.115799109 | 0.292207133 | 0.292207133 | -5.070982423 |
| 1459237_at   | 0.163800683  | 7.32275257  | 1.115765431  | 0.292220838 | 0.292220838 | -5.071013994 |
| 1444041_at   | 0.154670969  | 5.57881025  | 1.115754138  | 0.292225433 | 0.292225433 | -5.07102458  |
| 1442956_at   | -0.204877919 | 5.981056268 | -1.115721784 | 0.2922386   | 0.2922386   | -5.071054909 |
| 1432048_at   | 0.069672113  | 4.161398885 | 1.115646386  | 0.292269286 | 0.292269286 | -5.071125585 |
| 1445643_at   | 0.151280383  | 4.878931884 | 1.115594706  | 0.292290321 | 0.292290321 | -5.071174027 |
| 1449508_at   | 0.099109814  | 5.33505412  | 1.11558853   | 0.292292835 | 0.292292835 | -5.071179815 |
| 1455506_at   | -0.086782033 | 5.379659585 | -1.115569504 | 0.292300579 | 0.292300579 | -5.071197648 |
| 1426536_at   | 0.0975878    | 9.525258951 | 1.115511195  | 0.292324314 | 0.292324314 | -5.0712523   |
| 1420918_at   | -0.133591478 | 6.997366575 | -1.115460895 | 0.29234479  | 0.29234479  | -5.071299444 |
| 1458865_at   | 0.104163247  | 3.311162318 | 1.115376063  | 0.292379325 | 0.292379325 | -5.071378949 |
| 1448389_at   | -0.109107915 | 7.635495137 | -1.115347626 | 0.292390903 | 0.292390903 | -5.0714056   |
| 1431125_a_at | 0.073670292  | 7.809713005 | 1.115343515  | 0.292392577 | 0.292392577 | -5.071409453 |
| 1431719_a_at | 0.098651692  | 3.61813085  | 1.11534122   | 0.292393511 | 0.292393511 | -5.071411603 |
| 1428816_a_at | 0.096337053  | 5.880812115 | 1.115324678  | 0.292400246 | 0.292400246 | -5.071427106 |
| 1450662_at   | -0.12541129  | 7.590135479 | -1.115297152 | 0.292411453 | 0.292411453 | -5.071452901 |
| 1449560_at   | -0.089706366 | 3.977981366 | -1.115263993 | 0.292424954 | 0.292424954 | -5.071483976 |
| 1431139_at   | 0.068003903  | 4.164734327 | 1.115128971  | 0.292479936 | 0.292479936 | -5.071610501 |
| 1441781_at   | -0.108090486 | 4.507358935 | -1.114934504 | 0.292559138 | 0.292559138 | -5.071792711 |
| 1427492_at   | 0.238853508  | 5.475826376 | 1.114921141  | 0.292564581 | 0.292564581 | -5.07180523  |
| 1435657_at   | -0.242240127 | 6.390386801 | -1.114853265 | 0.292592229 | 0.292592229 | -5.071868822 |
| 1438127_at   | -0.080900675 | 7.784821437 | -1.114802927 | 0.292612736 | 0.292612736 | -5.071915981 |
| 1438741_at   | 0.103056807  | 5.285668398 | 1.114781578  | 0.292621433 | 0.292621433 | -5.071935981 |
| 1430163_at   | -0.089621429 | 4.957172503 | -1.114779928 | 0.292622105 | 0.292622105 | -5.071937527 |
| 1449964_a_at | -0.118346348 | 6.904182406 | -1.114745075 | 0.292636304 | 0.292636304 | -5.071970178 |
| 1425274_at   | -0.099512704 | 7.214671016 | -1.114706857 | 0.292651874 | 0.292651874 | -5.072005979 |
| 1449821_a_at | 0.079641778  | 9.584369378 | 1.114681473  | 0.292662217 | 0.292662217 | -5.072029758 |
| 1438189_s_at | -0.107051787 | 4.150443691 | -1.114649971 | 0.292675052 | 0.292675052 | -5.072059267 |
| 1456655_at   | -0.629404824 | 8.930866797 | -1.114585946 | 0.292701139 | 0.292701139 | -5.072119241 |
| 1451894_a_at | -0.083178513 | 4.433403405 | -1.114522959 | 0.292726806 | 0.292726806 | -5.072178239 |
| 1442402_at   | 0.15681751   | 5.945481987 | 1.114471007  | 0.292747977 | 0.292747977 | -5.072226899 |
| 1433968_a_at | 0.1232232    | 8.324055032 | 1.114467572  | 0.292749377 | 0.292749377 | -5.072230117 |
| 1443075_at   | -0.104819618 | 9.546625319 | -1.114445583 | 0.292758338 | 0.292758338 | -5.072250712 |
| 1437066_at   | -0.087735044 | 7.089367012 | -1.11443944  | 0.292760842 | 0.292760842 | -5.072256466 |
| 1432160_at   | 0.088083584  | 6.323767752 | 1.114363664  | 0.292791725 | 0.292791725 | -5.072327436 |
| 1437934_at   | 0.078783204  | 8.11385782  | 1.114339868  | 0.292801423 | 0.292801423 | -5.072349722 |
| 1440619_at   | -0.096169181 | 5.921299327 | -1.114332591 | 0.292804389 | 0.292804389 | -5.072356537 |
| 1430708_a_at | -0.121122284 | 5.008217649 | -1.114122827 | 0.292889896 | 0.292889896 | -5.072552976 |
| 1458453_at   | -0.111095621 | 5.589186145 | -1.113925204 | 0.292970472 | 0.292970472 | -5.07273802  |
| 1422283_at   | -0.093823518 | 4.714114683 | -1.113901171 | 0.292980272 | 0.292980272 | -5.072760521 |
| 1427806_at   | 0.07508522   | 4.02140316  | 1.113875502  | 0.292990739 | 0.292990739 | -5.072784554 |
| 1425217_a_at | 0.127534133  | 3.745507379 | 1.113865627  | 0.292994767 | 0.292994767 | -5.0727938   |
| 1418506_a_at | 0.077200235  | 12.15603632 | 1.113861168  | 0.292996585 | 0.292996585 | -5.072797975 |
| 1429665_at   | -0.22661181  | 5.735790844 | -1.113747951 | 0.293042757 | 0.293042757 | -5.072903969 |
| 1417041_at   | -0.077689553 | 9.594230768 | -1.113745496 | 0.293043758 | 0.293043758 | -5.072906268 |
| 1456973_at   | 0.092315236  | 6.656590389 | 1.113621636  | 0.293094278 | 0.293094278 | -5.073022219 |



|              |              |             |              |             |             |              |
|--------------|--------------|-------------|--------------|-------------|-------------|--------------|
| 1459631_at   | 0.092668989  | 4.861429804 | 1.113596583  | 0.293104497 | 0.293104497 | -5.07304567  |
| 1460252_s_at | 0.095576062  | 8.091738988 | 1.113540562  | 0.29312735  | 0.29312735  | -5.07309811  |
| 1418759_at   | 0.083311693  | 3.681615731 | 1.113414951  | 0.293178595 | 0.293178595 | -5.073215683 |
| 1434549_at   | 0.082367142  | 8.653663281 | 1.113361149  | 0.293200546 | 0.293200546 | -5.073266039 |
| 1445720_at   | 0.130276876  | 6.712964884 | 1.113270055  | 0.293237716 | 0.293237716 | -5.073351295 |
| 1442643_at   | 0.088593936  | 7.435870311 | 1.113267567  | 0.293238732 | 0.293238732 | -5.073353624 |
| 1449244_at   | -0.107901153 | 8.338677026 | -1.113177534 | 0.293275472 | 0.293275472 | -5.073437881 |
| 1446270_at   | -0.097015974 | 3.651930337 | -1.113163926 | 0.293281026 | 0.293281026 | -5.073450616 |
| 1432489_a_at | 0.099250449  | 6.614951438 | 1.113125506  | 0.293296705 | 0.293296705 | -5.07348657  |
| 1440859_at   | -0.089681215 | 6.41914874  | -1.113103537 | 0.293305671 | 0.293305671 | -5.073507128 |
| 1455953_x_at | 0.117409563  | 4.997070938 | 1.113082183  | 0.293314387 | 0.293314387 | -5.073527111 |
| 1431236_at   | 0.116035452  | 4.948556656 | 1.113050934  | 0.293327141 | 0.293327141 | -5.073556352 |
| 1430956_at   | -0.076330476 | 3.766634917 | -1.113048262 | 0.293328232 | 0.293328232 | -5.073558852 |
| 1450249_s_at | 0.109400018  | 5.500017195 | 1.112974438  | 0.293358365 | 0.293358365 | -5.073627931 |
| 1433841_at   | 0.084947932  | 6.259054931 | 1.112819759  | 0.293421509 | 0.293421509 | -5.073772657 |
| 1452879_at   | -0.266022138 | 5.367684423 | -1.112742644 | 0.293452993 | 0.293452993 | -5.073844804 |
| 1455896_a_at | -0.100247882 | 6.63359175  | -1.112735835 | 0.293455773 | 0.293455773 | -5.073851174 |
| 1446763_at   | -0.116298769 | 3.561496316 | -1.112728901 | 0.293458604 | 0.293458604 | -5.073857661 |
| 1435710_at   | 0.078108235  | 3.338588093 | 1.112701966  | 0.293469602 | 0.293469602 | -5.07388286  |
| 1436163_at   | -0.089179584 | 4.240188971 | -1.112647925 | 0.293491668 | 0.293491668 | -5.073933416 |
| 1418688_at   | 0.077928101  | 3.577419096 | 1.112642241  | 0.293493989 | 0.293493989 | -5.073938734 |
| 1442798_x_at | -0.094978797 | 5.179155668 | -1.112551194 | 0.293531168 | 0.293531168 | -5.074023905 |
| 1448103_s_at | 0.070432576  | 12.5921127  | 1.112531399  | 0.293539252 | 0.293539252 | -5.074042422 |
| 1452644_at   | -0.126471598 | 3.784689657 | -1.112462951 | 0.293567207 | 0.293567207 | -5.074106449 |
| 1432844_at   | -0.103292837 | 4.416452299 | -1.112433852 | 0.293579091 | 0.293579091 | -5.074133667 |
| 1439376_x_at | -0.184629047 | 3.837564531 | -1.112425197 | 0.293582627 | 0.293582627 | -5.074141763 |
| 1419577_at   | 0.06971179   | 8.389754167 | 1.112398997  | 0.293593328 | 0.293593328 | -5.074166269 |
| 1426945_at   | -0.086734335 | 10.15707858 | -1.11230543  | 0.293631546 | 0.293631546 | -5.074253784 |
| 1421032_a_at | -0.117559208 | 5.443069875 | -1.112277791 | 0.293642837 | 0.293642837 | -5.074279634 |
| 1425258_at   | 0.084355246  | 3.384633978 | 1.11220182   | 0.293673872 | 0.293673872 | -5.074350685 |
| 1454166_at   | 0.077015332  | 4.942699051 | 1.112149886  | 0.29369509  | 0.29369509  | -5.074399255 |
| 1421036_at   | 0.142372205  | 4.717141356 | 1.111581491  | 0.293927383 | 0.293927383 | -5.074930713 |
| 1426277_at   | -0.117014964 | 7.343294013 | -1.111546288 | 0.293941774 | 0.293941774 | -5.074963621 |
| 1416501_at   | 0.115735623  | 8.586455363 | 1.111499389  | 0.293960948 | 0.293960948 | -5.075007463 |
| 1434825_at   | -0.1450465   | 9.757544797 | -1.111490554 | 0.293964561 | 0.293964561 | -5.075015722 |
| 1447510_at   | -0.09667655  | 8.736341786 | -1.111444668 | 0.293983321 | 0.293983321 | -5.075058614 |
| 1426497_at   | -0.149149751 | 5.570356499 | -1.111330147 | 0.294030149 | 0.294030149 | -5.07516566  |
| 1458450_at   | 0.112393364  | 6.679596063 | 1.111279796  | 0.294050739 | 0.294050739 | -5.075212721 |
| 1445061_at   | 0.135296929  | 4.250439584 | 1.111261079  | 0.294058393 | 0.294058393 | -5.075230215 |
| 1435763_at   | 0.089544892  | 8.495357886 | 1.111257692  | 0.294059778 | 0.294059778 | -5.075233381 |
| 1459791_at   | -0.136107177 | 6.987638493 | -1.111241516 | 0.294066394 | 0.294066394 | -5.075248499 |
| 1442602_at   | 0.107813392  | 4.144199435 | 1.111111942  | 0.294119388 | 0.294119388 | -5.075369597 |
| 1426333_a_at | -0.066538808 | 7.378587093 | -1.111105802 | 0.294121899 | 0.294121899 | -5.075375336 |
| 1431867_a_at | -0.105775252 | 4.098645866 | -1.111074266 | 0.294134798 | 0.294134798 | -5.075404808 |
| 1429044_at   | 0.075296412  | 9.480605967 | 1.111033599  | 0.294151433 | 0.294151433 | -5.075442811 |
| 1421356_at   | 0.102501989  | 4.928312754 | 1.110992104  | 0.294168407 | 0.294168407 | -5.075481587 |
| 1427649_at   | 0.067339773  | 4.298747349 | 1.110864239  | 0.294220716 | 0.294220716 | -5.075601069 |
| 1425307_at   | -0.073516973 | 4.713493699 | -1.110860139 | 0.294222394 | 0.294222394 | -5.075604901 |
| 1452176_at   | 0.109329135  | 9.694086582 | 1.110841072  | 0.294230195 | 0.294230195 | -5.075622717 |
| 1421658_x_at | 0.173518759  | 3.449177868 | 1.110821253  | 0.294238304 | 0.294238304 | -5.075641235 |
| 1451045_at   | -0.092960138 | 3.800595827 | -1.110785126 | 0.294253085 | 0.294253085 | -5.075674991 |
| 1459804_at   | 0.164516248  | 5.70352055  | 1.110564223  | 0.294343481 | 0.294343481 | -5.075881376 |
| 1422072_a_at | 0.135566805  | 4.226207914 | 1.110563056  | 0.294343959 | 0.294343959 | -5.075882466 |

|                    |              |             |              |             |             |              |
|--------------------|--------------|-------------|--------------|-------------|-------------|--------------|
| 1416200_at         | -0.354693364 | 6.25880937  | -1.110531397 | 0.294356916 | 0.294356916 | -5.075912042 |
| 1444830_at         | -0.080685372 | 3.673251632 | -1.110364574 | 0.294425199 | 0.294425199 | -5.076067877 |
| 1445203_at         | -0.109146852 | 6.305924541 | -1.110260333 | 0.294467872 | 0.294467872 | -5.076165244 |
| 1442275_at         | -0.072607216 | 4.111626822 | -1.110242229 | 0.294475284 | 0.294475284 | -5.076182153 |
| 1416134_at         | 0.091764284  | 7.0555371   | 1.110147921  | 0.294513896 | 0.294513896 | -5.076270235 |
| 1418352_at         | 0.138421143  | 4.663204905 | 1.110146371  | 0.294514531 | 0.294514531 | -5.076271683 |
| 1427965_at         | 0.118455109  | 11.28465437 | 1.110139631  | 0.29451729  | 0.29451729  | -5.076277978 |
| 1435947_at         | -0.101670689 | 7.840010546 | -1.110130441 | 0.294521053 | 0.294521053 | -5.076286561 |
| 1439333_at         | -0.109793135 | 4.114664824 | -1.110118045 | 0.294526129 | 0.294526129 | -5.076298138 |
| 1424627_at         | 0.109859587  | 3.62288038  | 1.110045361  | 0.294555891 | 0.294555891 | -5.076366018 |
| 1460234_at         | 0.08135532   | 8.10131055  | 1.11001034   | 0.294570232 | 0.294570232 | -5.076398724 |
| 1438555_x_at       | 0.280912619  | 5.354934918 | 1.110003035  | 0.294573224 | 0.294573224 | -5.076405546 |
| 1425553_s_at       | 0.092930308  | 7.051480516 | 1.109860096  | 0.294631763 | 0.294631763 | -5.076539025 |
| 1443980_at         | -0.109549193 | 4.554032343 | -1.109835661 | 0.294641772 | 0.294641772 | -5.076561842 |
| 1433823_at         | 0.122384718  | 6.006669932 | 1.109766025  | 0.294670294 | 0.294670294 | -5.076626863 |
| 1423743_at         | -0.081850169 | 9.60078171  | -1.109737203 | 0.2946821   | 0.2946821   | -5.076653774 |
| 1426074_at         | -0.078487946 | 5.952889961 | -1.109673634 | 0.294708141 | 0.294708141 | -5.076713128 |
| 1432784_at         | -0.082943235 | 4.583856052 | -1.109656967 | 0.294714969 | 0.294714969 | -5.076728689 |
| 1421878_at         | -0.096444498 | 7.463050978 | -1.10964122  | 0.29472142  | 0.29472142  | -5.07674339  |
| 1444825_at         | 0.103227967  | 4.533646436 | 1.109610311  | 0.294734083 | 0.294734083 | -5.076772248 |
| 1444556_at         | 0.08761703   | 3.514539808 | 1.109525128  | 0.294768983 | 0.294768983 | -5.076851775 |
| 1425172_at         | -0.075522866 | 4.670615023 | -1.109522297 | 0.294770142 | 0.294770142 | -5.076854417 |
| 1433566_at         | -0.096397203 | 6.454282916 | -1.109350083 | 0.294840709 | 0.294840709 | -5.077015182 |
| 1456800_a_at       | -0.095667167 | 5.622016507 | -1.109189149 | 0.294906666 | 0.294906666 | -5.077165398 |
| AFFX-b-ActinMur/M: | 0.080747109  | 13.47098552 | 1.109088585  | 0.294947887 | 0.294947887 | -5.077259257 |
| 1440444_at         | -0.105736862 | 6.981398766 | -1.10906315  | 0.294958313 | 0.294958313 | -5.077282996 |
| 1444393_at         | 0.117488427  | 4.40227805  | 1.109063147  | 0.294958314 | 0.294958314 | -5.077282999 |
| 1436912_at         | 0.125047039  | 5.406558508 | 1.109002838  | 0.294983037 | 0.294983037 | -5.077339283 |
| 1416333_at         | -0.084604058 | 6.50719528  | -1.108998338 | 0.294984883 | 0.294984883 | -5.077343483 |
| 1455667_at         | -0.110560175 | 7.413601801 | -1.108909102 | 0.295021467 | 0.295021467 | -5.077426758 |
| 1420351_at         | -0.068872984 | 6.277285964 | -1.1088947   | 0.295027372 | 0.295027372 | -5.077440198 |
| 1436139_at         | 0.093295224  | 3.829662117 | 1.108886987  | 0.295030534 | 0.295030534 | -5.077447396 |
| 1457622_at         | -0.08565721  | 3.575724499 | -1.108801406 | 0.295065625 | 0.295065625 | -5.077527255 |
| 1425829_a_at       | 0.139537644  | 6.205555433 | 1.108790906  | 0.29506993  | 0.29506993  | -5.077537053 |
| 1437709_x_at       | -0.110308166 | 8.233241875 | -1.108702195 | 0.295106308 | 0.295106308 | -5.077619828 |
| 1445005_at         | -0.097190703 | 5.759785423 | -1.108683888 | 0.295113815 | 0.295113815 | -5.077636909 |
| 1459663_at         | -0.096673473 | 3.595277624 | -1.108653563 | 0.295126252 | 0.295126252 | -5.077665203 |
| 1416848_at         | 0.080360112  | 7.74913529  | 1.108652488  | 0.295126693 | 0.295126693 | -5.077666207 |
| 1429250_at         | -0.075761968 | 8.344993921 | -1.108645114 | 0.295129717 | 0.295129717 | -5.077673086 |
| 1432030_at         | 0.068913777  | 3.55175586  | 1.108610718  | 0.295143823 | 0.295143823 | -5.077705178 |
| 1418276_at         | -0.123505096 | 5.114587271 | -1.108552869 | 0.29516755  | 0.29516755  | -5.077759151 |
| 1444052_at         | -0.107549513 | 7.66690501  | -1.108533861 | 0.295175346 | 0.295175346 | -5.077776885 |
| 1455389_s_at       | -0.116875519 | 9.421131375 | -1.108526029 | 0.295178558 | 0.295178558 | -5.077784191 |
| 1437678_at         | 0.07053987   | 3.093016293 | 1.108520504  | 0.295180825 | 0.295180825 | -5.077789346 |
| 1456395_at         | -0.12656322  | 5.005178335 | -1.10835521  | 0.295248629 | 0.295248629 | -5.077943548 |
| 1434292_at         | 0.246143832  | 5.485340781 | 1.108308448  | 0.295267814 | 0.295267814 | -5.077987168 |
| 1453814_at         | -0.090068545 | 3.717683364 | -1.10830176  | 0.295270558 | 0.295270558 | -5.077993407 |
| 1441999_at         | 0.068750329  | 5.86281982  | 1.108250247  | 0.295291692 | 0.295291692 | -5.078041458 |
| 1418138_at         | 0.077450206  | 3.606588059 | 1.108196518  | 0.295313737 | 0.295313737 | -5.078091574 |
| 1450764_at         | 0.106990079  | 4.382888751 | 1.108127808  | 0.295341931 | 0.295341931 | -5.078155662 |
| 1423671_at         | -0.313076126 | 5.835521178 | -1.107981051 | 0.295402157 | 0.295402157 | -5.078292536 |
| 1437204_a_at       | 0.138170886  | 7.20823585  | 1.107977965  | 0.295403423 | 0.295403423 | -5.078295413 |
| 1424060_at         | 0.07052013   | 7.985875952 | 1.107885588  | 0.295441338 | 0.295441338 | -5.078381562 |

|              |              |             |              |             |             |              |
|--------------|--------------|-------------|--------------|-------------|-------------|--------------|
| 1441519_at   | 0.104187896  | 4.22215041  | 1.107768835  | 0.295489262 | 0.295489262 | -5.078490436 |
| 1455500_at   | -0.096654281 | 7.55944748  | -1.10770537  | 0.295515316 | 0.295515316 | -5.078549615 |
| 1422908_at   | -0.416531316 | 5.033512409 | -1.107684422 | 0.295523916 | 0.295523916 | -5.078569147 |
| 1417228_at   | -0.112051801 | 6.649503457 | -1.107651628 | 0.29553738  | 0.29553738  | -5.078599725 |
| 1455605_at   | -0.114921381 | 7.24673662  | -1.107639368 | 0.295542413 | 0.295542413 | -5.078611156 |
| 1426663_s_at | -0.149515759 | 5.223835728 | -1.107606329 | 0.295555978 | 0.295555978 | -5.078641961 |
| 1445239_at   | -0.075569861 | 6.891654301 | -1.107578287 | 0.295567491 | 0.295567491 | -5.078668107 |
| 1458824_at   | -0.078660657 | 3.584091004 | -1.107561342 | 0.295574449 | 0.295574449 | -5.078683905 |
| 1439265_at   | 0.227533873  | 4.774488968 | 1.107529461  | 0.295587539 | 0.295587539 | -5.078713663 |
| 1453199_at   | 0.090098035  | 8.056929242 | 1.107524082  | 0.295589748 | 0.295589748 | -5.078718645 |
| 1446934_at   | -0.185916173 | 3.781937615 | -1.107497967 | 0.295600471 | 0.295600471 | -5.078742992 |
| 1455362_at   | 0.107301678  | 6.937943773 | 1.107451724  | 0.295619461 | 0.295619461 | -5.078786105 |
| 1433431_at   | 0.072291158  | 4.000241233 | 1.107422449  | 0.295631482 | 0.295631482 | -5.078813397 |
| 1455298_at   | -0.123267828 | 4.996427081 | -1.107239351 | 0.29570668  | 0.29570668  | -5.078984082 |
| 1437988_x_at | -0.092564347 | 3.244392424 | -1.107109987 | 0.295759819 | 0.295759819 | -5.079104663 |
| 1436099_at   | -0.12631205  | 6.166037198 | -1.107105449 | 0.295761684 | 0.295761684 | -5.079108893 |
| 1435684_at   | 0.116812004  | 8.130010011 | 1.106985915  | 0.295810791 | 0.295810791 | -5.079220302 |
| 1439820_at   | -0.092047685 | 7.484264743 | -1.10698353  | 0.295811771 | 0.295811771 | -5.079222525 |
| 1416325_at   | -0.113709573 | 3.207474156 | -1.106967569 | 0.295818329 | 0.295818329 | -5.079237401 |
| 1440842_at   | -0.122667635 | 4.16293205  | -1.106916089 | 0.29583948  | 0.29583948  | -5.079285378 |
| 1424752_x_at | 0.153193464  | 7.554096109 | 1.106828976  | 0.295875276 | 0.295875276 | -5.079366561 |
| 1421244_at   | -0.081533099 | 3.842749624 | -1.106760756 | 0.29590331  | 0.29590331  | -5.079430133 |
| 1435400_at   | 0.1373603    | 6.361498089 | 1.106664931  | 0.295942691 | 0.295942691 | -5.079519425 |
| 1451492_at   | -0.096341436 | 5.469473303 | -1.106596602 | 0.295970775 | 0.295970775 | -5.079583092 |
| 1440578_at   | -0.080331877 | 6.646276563 | -1.106560487 | 0.29598562  | 0.29598562  | -5.079616742 |
| 1447422_at   | 0.15964794   | 4.735811603 | 1.10651531   | 0.29600419  | 0.29600419  | -5.079658833 |
| 1444778_at   | 0.116149388  | 5.410813318 | 1.106473183  | 0.296021507 | 0.296021507 | -5.079698083 |
| 1440063_at   | 0.153323419  | 6.358658063 | 1.106285737  | 0.29609857  | 0.29609857  | -5.079872711 |
| 1449729_at   | 0.10907649   | 3.432711863 | 1.106243017  | 0.296116136 | 0.296116136 | -5.079912507 |
| 1428175_at   | -0.069839229 | 7.706761856 | -1.106127706 | 0.296163553 | 0.296163553 | -5.080019918 |
| 1451421_a_at | -0.123829444 | 8.614296882 | -1.10609376  | 0.296177513 | 0.296177513 | -5.080051538 |
| 1444278_at   | -0.085555087 | 5.868516959 | -1.106089471 | 0.296179277 | 0.296179277 | -5.080055533 |
| 1426697_a_at | 0.070163763  | 8.508239611 | 1.105941671  | 0.296240065 | 0.296240065 | -5.080193191 |
| 1431022_at   | -0.098978144 | 3.8647681   | -1.105930348 | 0.296244722 | 0.296244722 | -5.080203737 |
| 1438074_at   | 0.090927623  | 5.62233942  | 1.105919442  | 0.296249208 | 0.296249208 | -5.080213895 |
| 1436498_at   | 0.072387161  | 9.951679847 | 1.105915254  | 0.296250931 | 0.296250931 | -5.080217795 |
| 1444040_at   | -0.071830052 | 3.700334841 | -1.105913427 | 0.296251682 | 0.296251682 | -5.080219496 |
| 1440566_at   | 0.138351295  | 4.819743273 | 1.105896021  | 0.296258842 | 0.296258842 | -5.080235707 |
| 1421859_at   | 0.13677825   | 8.675838254 | 1.105887187  | 0.296262475 | 0.296262475 | -5.080243934 |
| 1420166_at   | 0.092052223  | 3.797020961 | 1.105771919  | 0.296309893 | 0.296309893 | -5.08035128  |
| 1445180_at   | 0.13956889   | 5.75095187  | 1.10576823   | 0.296311411 | 0.296311411 | -5.080354716 |
| 1445805_x_at | -0.08573803  | 6.382458166 | -1.105742088 | 0.296322166 | 0.296322166 | -5.08037906  |
| 1438890_at   | -0.069982174 | 6.65505732  | -1.105674549 | 0.296349953 | 0.296349953 | -5.080441952 |
| 1418857_at   | -0.111344144 | 5.663753587 | -1.10562808  | 0.296369072 | 0.296369072 | -5.080485223 |
| 1435129_at   | 0.166434067  | 11.09075001 | 1.105614157  | 0.296374801 | 0.296374801 | -5.080498187 |
| 1423798_a_at | 0.090400379  | 12.05499556 | 1.105568834  | 0.29639345  | 0.29639345  | -5.080540388 |
| 1430251_at   | 0.070404096  | 7.365181174 | 1.105549095  | 0.296401572 | 0.296401572 | -5.080558767 |
| 1430648_at   | 0.35720099   | 5.910565751 | 1.105545664  | 0.296402984 | 0.296402984 | -5.080561962 |
| 1437797_at   | -0.090530538 | 7.780120139 | -1.105522037 | 0.296412707 | 0.296412707 | -5.080583961 |
| 1451958_at   | 0.107851053  | 3.917046483 | 1.105516256  | 0.296415086 | 0.296415086 | -5.080589344 |
| 1447370_at   | -0.094321249 | 5.703441351 | -1.105438818 | 0.296446953 | 0.296446953 | -5.080661442 |
| 1458023_at   | 0.072722125  | 4.841932146 | 1.105374273  | 0.296473517 | 0.296473517 | -5.080721535 |
| 1431169_at   | -0.093817931 | 3.550701215 | -1.105346302 | 0.296485029 | 0.296485029 | -5.080747575 |

|              |              |             |              |             |             |              |
|--------------|--------------|-------------|--------------|-------------|-------------|--------------|
| 1428819_at   | -0.098521977 | 8.396269759 | -1.105340304 | 0.296487498 | 0.296487498 | -5.080753159 |
| 1450375_at   | -0.103448902 | 4.198115791 | -1.105252564 | 0.296523612 | 0.296523612 | -5.08083484  |
| 1421667_at   | 0.071037309  | 4.766276447 | 1.105250669  | 0.296524392 | 0.296524392 | -5.080836604 |
| 1416316_at   | -0.240116024 | 6.167072455 | -1.105154819 | 0.296563849 | 0.296563849 | -5.08092583  |
| 1431096_at   | 0.11860196   | 7.398935592 | 1.105145246  | 0.29656779  | 0.29656779  | -5.080934741 |
| 1417382_at   | -0.147601306 | 7.936151781 | -1.105131114 | 0.296573608 | 0.296573608 | -5.080947896 |
| 1452927_x_at | -0.070273473 | 11.91325013 | -1.105124115 | 0.296576489 | 0.296576489 | -5.08095441  |
| 1448342_at   | 0.085401649  | 4.814664865 | 1.10509836   | 0.296587092 | 0.296587092 | -5.080978383 |
| 1422077_at   | -0.087901956 | 3.794664987 | -1.105073909 | 0.296597158 | 0.296597158 | -5.081001143 |
| 1452711_at   | 0.114868269  | 4.99364305  | 1.10506704   | 0.296599986 | 0.296599986 | -5.081007537 |
| 1453435_a_at | 0.127013842  | 5.635680055 | 1.105035603  | 0.296612929 | 0.296612929 | -5.081036798 |
| 1455847_at   | 0.092105062  | 4.78196816  | 1.105033019  | 0.296613993 | 0.296613993 | -5.081039203 |
| 1422172_x_at | 0.088919174  | 5.404343635 | 1.104969059  | 0.296640328 | 0.296640328 | -5.081098734 |
| 1448002_x_at | 0.072909302  | 3.253578331 | 1.104473034  | 0.296844622 | 0.296844622 | -5.081560328 |
| 1422488_at   | -0.080193873 | 9.107099733 | -1.104403118 | 0.296873426 | 0.296873426 | -5.081625379 |
| 1417302_at   | -0.189226682 | 8.690729303 | -1.104389433 | 0.296879065 | 0.296879065 | -5.081638111 |
| 1431673_at   | -0.110206221 | 3.925569802 | -1.104262749 | 0.296931263 | 0.296931263 | -5.081755971 |
| 1454812_at   | 0.076398578  | 6.657713544 | 1.104245026  | 0.296938566 | 0.296938566 | -5.081772458 |
| 1441660_at   | 0.125328192  | 5.993371002 | 1.104090892  | 0.297002086 | 0.297002086 | -5.08191584  |
| 1424517_at   | 0.083598105  | 6.698565252 | 1.104053817  | 0.297017366 | 0.297017366 | -5.081950326 |
| 1448960_at   | 0.169367819  | 8.216055718 | 1.103920733  | 0.297072222 | 0.297072222 | -5.082074112 |
| 1456634_at   | 0.072936805  | 5.817421085 | 1.103880981  | 0.297088609 | 0.297088609 | -5.082111084 |
| 1420063_at   | -0.094416024 | 4.120737605 | -1.103871    | 0.297092724 | 0.297092724 | -5.082120367 |
| 1434803_a_at | -0.104453174 | 4.502189935 | -1.103844591 | 0.297103611 | 0.297103611 | -5.082144929 |
| 1424538_at   | -0.086222586 | 9.007820119 | -1.103823702 | 0.297112223 | 0.297112223 | -5.082164356 |
| 1449087_at   | -0.079647307 | 6.007185818 | -1.103761616 | 0.297137819 | 0.297137819 | -5.082222097 |
| 1435732_x_at | 0.07257985   | 11.7056895  | 1.103737092  | 0.29714793  | 0.29714793  | -5.082244903 |
| 1444983_at   | 0.13256427   | 5.036549843 | 1.103680717  | 0.297171174 | 0.297171174 | -5.08229733  |
| 1440618_at   | -0.192111213 | 5.102472831 | -1.103620711 | 0.297195917 | 0.297195917 | -5.08235313  |
| 1445671_at   | 0.094160945  | 6.483217758 | 1.103587791  | 0.297209492 | 0.297209492 | -5.082383743 |
| 1442694_at   | 0.07880871   | 3.759271625 | 1.103539742  | 0.297229306 | 0.297229306 | -5.082428421 |
| 1447714_x_at | 0.098598707  | 3.267337409 | 1.103499028  | 0.297246096 | 0.297246096 | -5.082466279 |
| 1418348_a_at | -0.127498014 | 6.15292957  | -1.103394798 | 0.297289084 | 0.297289084 | -5.082563192 |
| 1442173_at   | -0.091033401 | 3.876013945 | -1.103352259 | 0.29730663  | 0.29730663  | -5.082602742 |
| 1449482_at   | 0.190809962  | 7.310024674 | 1.103273497  | 0.297339118 | 0.297339118 | -5.082675968 |
| 1448022_at   | 0.071402526  | 3.134961893 | 1.103191841  | 0.297372803 | 0.297372803 | -5.08275188  |
| 1447874_x_at | -0.096232628 | 5.404512322 | -1.103133521 | 0.297396864 | 0.297396864 | -5.082806095 |
| 1446525_at   | -0.112135781 | 9.01146401  | -1.103117145 | 0.29740362  | 0.29740362  | -5.082821318 |
| 1459141_at   | -0.088746596 | 4.644148649 | -1.103041626 | 0.297434779 | 0.297434779 | -5.082891518 |
| 1458445_at   | 0.093723752  | 3.478903775 | 1.103037886  | 0.297436322 | 0.297436322 | -5.082894995 |
| 1449841_at   | -0.120933638 | 8.900557292 | -1.103011359 | 0.297447267 | 0.297447267 | -5.082919652 |
| 1447109_at   | 0.135743265  | 7.240571955 | 1.103001699  | 0.297451253 | 0.297451253 | -5.082928631 |
| 1444749_at   | -0.107667991 | 4.467710614 | -1.102842933 | 0.29751677  | 0.29751677  | -5.083076199 |
| 1437598_at   | -0.11495341  | 7.53756264  | -1.102834618 | 0.297520202 | 0.297520202 | -5.083083927 |
| 1417784_at   | -0.086693616 | 3.655636161 | -1.102800063 | 0.297534463 | 0.297534463 | -5.083116042 |
| 1429645_at   | 0.077093587  | 3.320298704 | 1.102785542  | 0.297540456 | 0.297540456 | -5.083129538 |
| 1433743_at   | 0.128735485  | 3.950304984 | 1.102587775  | 0.297622088 | 0.297622088 | -5.083313327 |
| 1421973_at   | -0.090447803 | 4.643403956 | -1.102570219 | 0.297629335 | 0.297629335 | -5.083329641 |
| 1416845_at   | -0.12375953  | 9.461838048 | -1.102561123 | 0.297633091 | 0.297633091 | -5.083338093 |
| 1430943_at   | -0.072509135 | 3.396145898 | -1.102532887 | 0.297644747 | 0.297644747 | -5.083364331 |
| 1429288_x_at | 0.09718309   | 8.057004018 | 1.102509933  | 0.297654223 | 0.297654223 | -5.08338566  |
| 1450560_a_at | -0.11827213  | 8.420976547 | -1.102418699 | 0.297691891 | 0.297691891 | -5.083470433 |
| 1421596_s_at | 0.090975708  | 3.624854767 | 1.1023275    | 0.297729548 | 0.297729548 | -5.083555169 |

|                |              |             |              |             |             |              |
|----------------|--------------|-------------|--------------|-------------|-------------|--------------|
| 1418754_at     | -0.097145259 | 6.007367355 | -1.102298684 | 0.297741447 | 0.297741447 | -5.083581941 |
| 1423483_s_at   | 0.073638689  | 7.393843339 | 1.102271126  | 0.297752827 | 0.297752827 | -5.083607544 |
| 1451053_a_at   | -0.159525626 | 7.298105617 | -1.102247076 | 0.297762759 | 0.297762759 | -5.083629888 |
| 1428176_at     | 0.084079923  | 9.071952338 | 1.102190773  | 0.297786011 | 0.297786011 | -5.083682195 |
| 1418513_at     | 0.075843617  | 7.720871592 | 1.102164698  | 0.297796779 | 0.297796779 | -5.083706419 |
| 1419213_at     | -0.111036975 | 7.923226749 | -1.102122989 | 0.297814006 | 0.297814006 | -5.083745166 |
| 1416858_a_at   | 0.137329341  | 10.73243517 | 1.102008197  | 0.29786142  | 0.29786142  | -5.0838518   |
| 1428315_at     | 0.071939792  | 9.272472981 | 1.10189046   | 0.297910057 | 0.297910057 | -5.083961161 |
| 1432410_a_at   | 0.185344098  | 6.45767047  | 1.10175284   | 0.297966915 | 0.297966915 | -5.08408898  |
| 1460722_at     | 0.073185416  | 3.990215583 | 1.101708343  | 0.297985301 | 0.297985301 | -5.084130305 |
| 1446866_at     | -0.078507667 | 3.681344305 | -1.101703823 | 0.297987169 | 0.297987169 | -5.084134503 |
| 1458900_at     | 0.152812869  | 5.756726011 | 1.101680361  | 0.297996863 | 0.297996863 | -5.084156292 |
| 1452435_at     | 0.090778852  | 5.904598365 | 1.101666636  | 0.298002535 | 0.298002535 | -5.084169039 |
| 1434071_a_at   | 0.162343752  | 7.408596469 | 1.101644186  | 0.298011812 | 0.298011812 | -5.084189887 |
| 1421029_a_at   | 0.074386556  | 9.597097764 | 1.101641032  | 0.298013115 | 0.298013115 | -5.084192817 |
| 1437998_at     | -0.084832532 | 3.444587817 | -1.101581728 | 0.298037623 | 0.298037623 | -5.084247889 |
| 1419229_at     | -0.080869597 | 4.345338719 | -1.101573535 | 0.298041008 | 0.298041008 | -5.084255497 |
| 1426311_s_at   | 0.072209748  | 8.514493444 | 1.101539754  | 0.298054969 | 0.298054969 | -5.084286867 |
| 1433242_at     | 0.126662191  | 7.107145645 | 1.101505167  | 0.298069264 | 0.298069264 | -5.084318984 |
| 1417714_x_at   | 0.456756747  | 12.40604128 | 1.10149723   | 0.298072544 | 0.298072544 | -5.084326355 |
| 1448431_at     | -0.10535038  | 7.432681508 | -1.10139394  | 0.298115236 | 0.298115236 | -5.084422264 |
| 1427602_at     | -0.173825365 | 5.861687483 | -1.101384576 | 0.298119106 | 0.298119106 | -5.084430958 |
| 1454213_at     | 0.089386054  | 4.715930558 | 1.101370705  | 0.29812484  | 0.29812484  | -5.084443838 |
| 1444154_at     | -0.123610288 | 5.908781133 | -1.101151356 | 0.29821552  | 0.29821552  | -5.084647488 |
| 1418578_at     | 0.090602907  | 7.994851704 | 1.101149627  | 0.298216235 | 0.298216235 | -5.084649093 |
| AFFX-DapX-5_at | 0.164073596  | 5.775800737 | 1.1011436    | 0.298218727 | 0.298218727 | -5.084654688 |
| 1440519_at     | 0.102479878  | 3.647977916 | 1.101126135  | 0.298225948 | 0.298225948 | -5.084670902 |
| 1432192_at     | -0.074629708 | 3.658296493 | -1.100978851 | 0.298286849 | 0.298286849 | -5.084807626 |
| 1437759_at     | 0.203099798  | 5.0127397   | 1.100936316  | 0.298304439 | 0.298304439 | -5.084847109 |
| 1441107_at     | 0.126468867  | 8.244891783 | 1.100892134  | 0.298322711 | 0.298322711 | -5.084888119 |
| 1458329_x_at   | 0.082705218  | 3.163116167 | 1.100843097  | 0.298342992 | 0.298342992 | -5.084933635 |
| 1437565_a_at   | 0.131299522  | 8.499427125 | 1.100813057  | 0.298355416 | 0.298355416 | -5.084961517 |
| 1455312_at     | -0.086615007 | 8.754230037 | -1.100812666 | 0.298355578 | 0.298355578 | -5.08496188  |
| 1451352_s_at   | 0.081456609  | 8.477891979 | 1.100804744  | 0.298358855 | 0.298358855 | -5.084969233 |
| 1427562_a_at   | 0.111210187  | 4.939695947 | 1.100780845  | 0.298368739 | 0.298368739 | -5.084991414 |
| 1455484_at     | 0.088427883  | 3.807776944 | 1.10075191   | 0.298380708 | 0.298380708 | -5.085018269 |
| 1454403_at     | -0.081565734 | 4.484072795 | -1.100748638 | 0.298382061 | 0.298382061 | -5.085021306 |
| 1434323_at     | 0.0757902    | 3.688841072 | 1.100723507  | 0.298392456 | 0.298392456 | -5.08504463  |
| 1436607_a_at   | 0.092452373  | 6.520695144 | 1.100660242  | 0.298418626 | 0.298418626 | -5.085103345 |
| 1432922_at     | 0.103014174  | 3.35249931  | 1.100636602  | 0.298428406 | 0.298428406 | -5.085125284 |
| 1444205_at     | 0.085672934  | 5.00995751  | 1.100590534  | 0.298447464 | 0.298447464 | -5.085168036 |
| 1446582_at     | -0.081311885 | 4.275086023 | -1.100503137 | 0.298483622 | 0.298483622 | -5.08524914  |
| 1457854_at     | 0.126740803  | 4.207122929 | 1.100380932  | 0.298534187 | 0.298534187 | -5.085362536 |
| 1423264_at     | -0.094247112 | 8.41137403  | -1.100374106 | 0.298537011 | 0.298537011 | -5.08536887  |
| 1444802_at     | 0.102863999  | 3.91432667  | 1.100328964  | 0.298555691 | 0.298555691 | -5.085410755 |
| 1430612_at     | -0.1104196   | 4.819809427 | -1.100301367 | 0.298567112 | 0.298567112 | -5.085436361 |
| 1424149_at     | 0.135576403  | 8.32552275  | 1.100295994  | 0.298569335 | 0.298569335 | -5.085441346 |
| 1441594_at     | 0.087795993  | 6.25721803  | 1.10027609   | 0.298577572 | 0.298577572 | -5.085459814 |
| 1446875_at     | -0.144456753 | 3.673107371 | -1.100274363 | 0.298578287 | 0.298578287 | -5.085461416 |
| 1456708_at     | -0.077028946 | 3.441593012 | -1.100273928 | 0.298578467 | 0.298578467 | -5.08546182  |
| 1424307_at     | 0.09917723   | 7.860092243 | 1.100234122  | 0.298594941 | 0.298594941 | -5.085498751 |
| 1451368_at     | -0.075486296 | 7.385966653 | -1.100212356 | 0.298603949 | 0.298603949 | -5.085518946 |
| 1450999_a_at   | -0.112388978 | 4.041002885 | -1.100107205 | 0.298647471 | 0.298647471 | -5.085616499 |

|              |              |             |              |             |             |              |
|--------------|--------------|-------------|--------------|-------------|-------------|--------------|
| 1432863_a_at | -0.132672556 | 4.81271122  | -1.10007767  | 0.298659696 | 0.298659696 | -5.085643899 |
| 1431590_at   | -0.098579544 | 4.282716126 | -1.100052144 | 0.298670262 | 0.298670262 | -5.085667579 |
| 1440363_at   | 0.111273039  | 5.022143825 | 1.10003694   | 0.298676556 | 0.298676556 | -5.085681683 |
| 1433803_at   | 0.115252431  | 8.229636536 | 1.100027231  | 0.298680575 | 0.298680575 | -5.08569069  |
| 1454650_at   | 0.082759365  | 10.86681118 | 1.100023763  | 0.29868201  | 0.29868201  | -5.085693907 |
| 1440288_at   | -0.084552236 | 4.507928328 | -1.099930021 | 0.298720818 | 0.298720818 | -5.085780865 |
| 1421609_a_at | -0.123534353 | 4.032227288 | -1.099918166 | 0.298725726 | 0.298725726 | -5.085791862 |
| 1459012_at   | -0.082700263 | 3.071027044 | -1.099867871 | 0.298746549 | 0.298746549 | -5.085838515 |
| 1436256_at   | 0.120554151  | 6.478358901 | 1.099740167  | 0.298799425 | 0.298799425 | -5.085956962 |
| 1428654_at   | -0.071932091 | 7.908027694 | -1.099681911 | 0.298823549 | 0.298823549 | -5.086010993 |
| 1446836_at   | -0.095444705 | 5.262162283 | -1.099659426 | 0.29883286  | 0.29883286  | -5.086031846 |
| 1439733_at   | -0.094855814 | 3.413842352 | -1.099631439 | 0.29884445  | 0.29884445  | -5.086057802 |
| 1446012_at   | 0.128906432  | 5.686385045 | 1.099625371  | 0.298846963 | 0.298846963 | -5.08606343  |
| 1448315_a_at | 0.078599255  | 9.013124994 | 1.09959401   | 0.298859951 | 0.298859951 | -5.086092514 |
| 1429577_at   | 0.092751063  | 4.488221694 | 1.099553592  | 0.29887669  | 0.29887669  | -5.086129996 |
| 1430391_a_at | -0.068580413 | 4.435498383 | -1.099546917 | 0.298879455 | 0.298879455 | -5.086136187 |
| 1425747_at   | 0.110832652  | 4.826163189 | 1.099455722  | 0.298917227 | 0.298917227 | -5.086220755 |
| 1446169_at   | 0.102094976  | 5.12398075  | 1.099421203  | 0.298931525 | 0.298931525 | -5.086252764 |
| 1432476_at   | -0.080888722 | 3.616650497 | -1.099398791 | 0.298940809 | 0.298940809 | -5.086273547 |
| 1451747_a_at | 0.087374982  | 8.189262348 | 1.09938892   | 0.298944898 | 0.298944898 | -5.0862827   |
| 1447341_at   | -0.090442086 | 3.363311103 | -1.09931593  | 0.298975135 | 0.298975135 | -5.086350379 |
| 1441018_at   | 0.149977533  | 5.094704068 | 1.099251439  | 0.299001852 | 0.299001852 | -5.086410174 |
| 1428912_at   | -0.099530664 | 4.603861995 | -1.099250825 | 0.299002106 | 0.299002106 | -5.086410744 |
| 1444415_at   | -0.071848428 | 5.915137504 | -1.099205906 | 0.299020717 | 0.299020717 | -5.086452391 |
| 1441485_at   | -0.127457843 | 5.27644063  | -1.099200155 | 0.2990231   | 0.2990231   | -5.086457723 |
| 1429921_at   | 0.121456174  | 6.345189843 | 1.099152809  | 0.299042717 | 0.299042717 | -5.086501619 |
| 1455636_at   | -0.093990486 | 5.552786204 | -1.099126005 | 0.299053823 | 0.299053823 | -5.086526469 |
| 1446679_at   | -0.099684309 | 4.74564539  | -1.09910756  | 0.299061466 | 0.299061466 | -5.086543569 |
| 1439524_at   | 0.095835471  | 6.198209014 | 1.099036162  | 0.299091052 | 0.299091052 | -5.086609759 |
| 1417040_a_at | 0.073523648  | 7.970917896 | 1.098908784  | 0.299143841 | 0.299143841 | -5.086727839 |
| 1423603_at   | 0.122093225  | 4.420018292 | 1.098885348  | 0.299153554 | 0.299153554 | -5.086749563 |
| 1421246_at   | 0.174537953  | 7.509017204 | 1.098876044  | 0.29915741  | 0.29915741  | -5.086758188 |
| 1458208_s_at | 0.119713113  | 6.864130659 | 1.09882911   | 0.299176864 | 0.299176864 | -5.086801693 |
| 1424863_a_at | -0.109266101 | 7.645417611 | -1.098697355 | 0.299231479 | 0.299231479 | -5.086923813 |
| 1446662_at   | -0.103575702 | 4.583740104 | -1.098607894 | 0.299268566 | 0.299268566 | -5.087006725 |
| 1430920_at   | 0.083441981  | 6.552676638 | 1.098593182  | 0.299274666 | 0.299274666 | -5.08702036  |
| 1452173_at   | -0.076519664 | 9.647094755 | -1.098550015 | 0.299292563 | 0.299292563 | -5.087060365 |
| 1438813_at   | -0.079028116 | 3.466518563 | -1.098502314 | 0.299312341 | 0.299312341 | -5.087104571 |
| 1459157_at   | 0.108800317  | 6.39289049  | 1.09850065   | 0.299313031 | 0.299313031 | -5.087106113 |
| 1431150_at   | -0.07871539  | 4.134125603 | -1.098409073 | 0.299351004 | 0.299351004 | -5.087190975 |
| 1437060_at   | -0.104889087 | 3.578187711 | -1.098363045 | 0.299370091 | 0.299370091 | -5.087233627 |
| 1450035_a_at | 0.161719976  | 8.660616863 | 1.098311793  | 0.299391346 | 0.299391346 | -5.087281117 |
| 1456171_at   | -0.074129687 | 4.242910501 | -1.098295787 | 0.299397984 | 0.299397984 | -5.087295948 |
| 1420591_at   | 0.087826944  | 5.038742477 | 1.098268841  | 0.299409159 | 0.299409159 | -5.087320915 |
| 1432105_at   | -0.1163497   | 3.820922747 | -1.098248139 | 0.299417745 | 0.299417745 | -5.087340097 |
| 1424989_at   | 0.079283808  | 5.235189043 | 1.098130804  | 0.299466413 | 0.299466413 | -5.08744881  |
| 1437071_at   | 0.125337773  | 7.058562484 | 1.098130313  | 0.299466617 | 0.299466617 | -5.087449264 |
| 1435839_at   | -0.072945473 | 4.116111612 | -1.098104131 | 0.299477477 | 0.299477477 | -5.087473521 |
| 1454086_a_at | 0.077754897  | 7.879944671 | 1.098031835  | 0.299507468 | 0.299507468 | -5.087540499 |
| 1435386_at   | 0.148023139  | 6.036590698 | 1.098027071  | 0.299509444 | 0.299509444 | -5.087544912 |
| 1455794_at   | -0.106421379 | 6.924809027 | -1.097995842 | 0.299522399 | 0.299522399 | -5.087573843 |
| 1458555_at   | -0.100302302 | 3.811311401 | -1.097933563 | 0.299548237 | 0.299548237 | -5.087631536 |
| 1459828_at   | 0.095753447  | 5.17862522  | 1.097785421  | 0.299609705 | 0.299609705 | -5.087768761 |

|              |              |             |              |             |             |              |
|--------------|--------------|-------------|--------------|-------------|-------------|--------------|
| 1418772_at   | -0.146520308 | 8.419911616 | -1.09769124  | 0.299648788 | 0.299648788 | -5.087855995 |
| 1451546_s_at | -0.078839399 | 4.725125204 | -1.097646666 | 0.299667286 | 0.299667286 | -5.087897278 |
| 1433443_a_at | 0.097029045  | 11.297256   | 1.097600458  | 0.299686464 | 0.299686464 | -5.087940075 |
| 1447835_at   | 0.118007397  | 5.118672464 | 1.097551386  | 0.299706832 | 0.299706832 | -5.087985522 |
| 1443309_at   | -0.102632136 | 3.888831678 | -1.097530487 | 0.299715506 | 0.299715506 | -5.088004876 |
| 1451551_at   | -0.073894103 | 5.345115167 | -1.097458084 | 0.299745559 | 0.299745559 | -5.088071927 |
| 1430634_a_at | 0.14935989   | 5.587267339 | 1.097170692  | 0.299864875 | 0.299864875 | -5.088338043 |
| 1447371_at   | -0.138479311 | 4.661346934 | -1.097166958 | 0.299866425 | 0.299866425 | -5.0883415   |
| 1433168_x_at | 0.094221755  | 4.059257467 | 1.097157362  | 0.29987041  | 0.29987041  | -5.088350385 |
| 1459557_at   | 0.106056255  | 4.442683657 | 1.097148739  | 0.299873991 | 0.299873991 | -5.088358369 |
| 1443600_at   | 0.081621589  | 3.2229097   | 1.097116483  | 0.299887385 | 0.299887385 | -5.088388233 |
| 1438441_at   | -0.131995895 | 6.218952212 | -1.097102742 | 0.299893091 | 0.299893091 | -5.088400955 |
| 1453907_at   | -0.162412329 | 4.344363383 | -1.097066965 | 0.299907948 | 0.299907948 | -5.088434078 |
| 1431434_at   | 0.141556026  | 4.187656571 | 1.097050838  | 0.299914645 | 0.299914645 | -5.088449008 |
| 1419381_at   | 0.134870158  | 5.553000871 | 1.097008011  | 0.299932431 | 0.299932431 | -5.088488657 |
| 1455870_at   | -0.082801021 | 9.105071205 | -1.096924924 | 0.299966939 | 0.299966939 | -5.088565575 |
| 1430859_at   | 0.093463187  | 4.091147805 | 1.096919471  | 0.299969203 | 0.299969203 | -5.088570622 |
| 1444860_at   | 0.087533577  | 4.211833956 | 1.096792068  | 0.300022123 | 0.300022123 | -5.088688557 |
| 1454385_at   | 0.106842362  | 3.679996387 | 1.096789114  | 0.30002335  | 0.30002335  | -5.088691292 |
| 1451962_at   | -0.169659383 | 3.70970296  | -1.0967789   | 0.300027593 | 0.300027593 | -5.088700745 |
| 1457685_at   | 0.110370669  | 3.61306601  | 1.096760436  | 0.300035263 | 0.300035263 | -5.088717837 |
| 1436603_at   | -0.104006545 | 7.283464083 | -1.096705137 | 0.300058236 | 0.300058236 | -5.088769022 |
| 1433445_x_at | 0.091226079  | 11.23018948 | 1.096703587  | 0.30005888  | 0.30005888  | -5.088770457 |
| 1438396_at   | 0.104583771  | 7.780523675 | 1.096702289  | 0.300059419 | 0.300059419 | -5.088771658 |
| 1423241_a_at | -0.073204669 | 10.12583854 | -1.09666347  | 0.300075546 | 0.300075546 | -5.088807587 |
| 1433508_at   | 0.077544734  | 6.98963124  | 1.096655605  | 0.300078814 | 0.300078814 | -5.088814867 |
| 1426999_at   | 0.081153637  | 9.974534202 | 1.096451828  | 0.300163485 | 0.300163485 | -5.08900346  |
| 1441613_at   | 0.098877917  | 3.909482024 | 1.096448147  | 0.300165014 | 0.300165014 | -5.089006867 |
| 1450387_s_at | 0.07206783   | 8.089108533 | 1.096336358  | 0.300211472 | 0.300211472 | -5.089110316 |
| 1418011_a_at | -0.096166639 | 8.618995665 | -1.096310438 | 0.300222244 | 0.300222244 | -5.0891343   |
| 1446517_at   | -0.108997507 | 3.847977544 | -1.096284527 | 0.300233013 | 0.300233013 | -5.089158277 |
| 1440465_at   | -0.106484069 | 5.538356732 | -1.096245223 | 0.30024935  | 0.30024935  | -5.089194645 |
| 1415950_a_at | 0.13467351   | 12.16326404 | 1.096117847  | 0.300302296 | 0.300302296 | -5.089312501 |
| 1435012_x_at | 0.086463519  | 3.251568456 | 1.09606657   | 0.300323613 | 0.300323613 | -5.089359943 |
| 1447367_at   | -0.074766127 | 3.846725349 | -1.096027012 | 0.300340058 | 0.300340058 | -5.08939654  |
| 1423906_at   | 0.080127185  | 10.37391212 | 1.095965064  | 0.300365813 | 0.300365813 | -5.089453851 |
| 1426334_a_at | 0.151194828  | 5.418045609 | 1.095933411  | 0.300378974 | 0.300378974 | -5.089483133 |
| 1459298_at   | -0.099525526 | 4.410196055 | -1.095930638 | 0.300380127 | 0.300380127 | -5.089485699 |
| 1448967_at   | 0.074149011  | 8.761053523 | 1.09590802   | 0.300389531 | 0.300389531 | -5.089506622 |
| 1426709_a_at | 0.097011183  | 8.73504474  | 1.095863299  | 0.300408126 | 0.300408126 | -5.089547993 |
| 1451665_a_at | -0.114395372 | 8.256290797 | -1.095857553 | 0.300410516 | 0.300410516 | -5.089553308 |
| 1440365_at   | 0.131683968  | 6.778028515 | 1.095841534  | 0.300417177 | 0.300417177 | -5.089568126 |
| 1450668_s_at | -0.074252538 | 11.68877494 | -1.095625705 | 0.300506934 | 0.300506934 | -5.089767763 |
| 1438953_at   | -0.1352864   | 4.85411024  | -1.095625411 | 0.300507057 | 0.300507057 | -5.089768035 |
| 1437392_at   | -0.078216304 | 6.653603035 | -1.095555578 | 0.300536102 | 0.300536102 | -5.089832623 |
| 1457116_at   | 0.122665654  | 6.609006062 | 1.095258057  | 0.300659877 | 0.300659877 | -5.090107762 |
| 1451279_at   | -0.085270526 | 6.227029116 | -1.095128333 | 0.300713857 | 0.300713857 | -5.09022771  |
| 1432851_at   | -0.077563719 | 5.920870488 | -1.095119881 | 0.300717374 | 0.300717374 | -5.090235524 |
| 1435454_a_at | 0.107182835  | 6.234691961 | 1.095117102  | 0.300718531 | 0.300718531 | -5.090238094 |
| 1420395_a_at | -0.176040925 | 5.333509236 | -1.09504146  | 0.30075001  | 0.30075001  | -5.09030803  |
| 1435032_at   | -0.072718474 | 9.212807172 | -1.095039509 | 0.300750822 | 0.300750822 | -5.090309833 |
| 1419011_at   | -0.10315774  | 5.609625533 | -1.095015011 | 0.300761018 | 0.300761018 | -5.090332482 |
| 1427194_a_at | 0.094470964  | 7.431843392 | 1.094939404  | 0.300792487 | 0.300792487 | -5.090402382 |

|              |              |             |              |             |             |              |
|--------------|--------------|-------------|--------------|-------------|-------------|--------------|
| 1455437_at   | -0.087725731 | 9.003227074 | -1.094921468 | 0.300799952 | 0.300799952 | -5.090418963 |
| 1418497_at   | 0.105120985  | 9.247536235 | 1.094801892  | 0.300849727 | 0.300849727 | -5.090529503 |
| 1424259_at   | -0.09271958  | 6.957868731 | -1.094768596 | 0.300863588 | 0.300863588 | -5.090560281 |
| 1440707_at   | 0.118405495  | 7.342660184 | 1.094683163  | 0.300899156 | 0.300899156 | -5.09063925  |
| 1428558_at   | -0.069441805 | 7.037336605 | -1.094679601 | 0.300900639 | 0.300900639 | -5.090642543 |
| 1421206_at   | -0.125499667 | 4.386959242 | -1.094622536 | 0.300924398 | 0.300924398 | -5.090695289 |
| 1425603_at   | 0.117748644  | 8.410795527 | 1.094581872  | 0.30094133  | 0.30094133  | -5.090732873 |
| 1442068_at   | 0.076370841  | 5.178515561 | 1.094507003  | 0.300972506 | 0.300972506 | -5.090802069 |
| 1419777_at   | 0.109758997  | 3.732249765 | 1.094467475  | 0.300988966 | 0.300988966 | -5.0908386   |
| 1419486_at   | 0.142350155  | 8.148001195 | 1.094415242  | 0.301010719 | 0.301010719 | -5.090886873 |
| 1445086_at   | -0.099732627 | 3.422492097 | -1.094406162 | 0.3010145   | 0.3010145   | -5.090895264 |
| 1453739_at   | 0.123727661  | 7.012239745 | 1.094405101  | 0.301014942 | 0.301014942 | -5.090896244 |
| 1433758_at   | -0.134352717 | 9.571980588 | -1.094366148 | 0.301031165 | 0.301031165 | -5.090932242 |
| 1424309_a_at | -0.137399678 | 9.848380975 | -1.094343097 | 0.301040766 | 0.301040766 | -5.090953543 |
| 1460494_at   | 0.075524411  | 3.687200824 | 1.094310554  | 0.30105432  | 0.30105432  | -5.090983617 |
| 1430872_at   | 0.07559371   | 3.444887617 | 1.094177824  | 0.301109607 | 0.301109607 | -5.091106265 |
| 1441147_at   | -0.104749394 | 3.716243072 | -1.094094362 | 0.301144376 | 0.301144376 | -5.091183382 |
| 1417706_at   | -0.097506449 | 6.257410798 | -1.09398862  | 0.301188432 | 0.301188432 | -5.091281079 |
| 1423893_x_at | 0.077039067  | 7.733867851 | 1.093905962  | 0.301222873 | 0.301222873 | -5.091357442 |
| 1419980_at   | -0.096758288 | 5.369588006 | -1.09390196  | 0.30122454  | 0.30122454  | -5.09136114  |
| 1428464_at   | -0.091509601 | 11.12258481 | -1.093895296 | 0.301227317 | 0.301227317 | -5.091367297 |
| 1436865_at   | -0.105809717 | 6.79426788  | -1.093850564 | 0.301245957 | 0.301245957 | -5.091408621 |
| 1440571_at   | -0.246275437 | 5.712627998 | -1.093849036 | 0.301246594 | 0.301246594 | -5.091410032 |
| 1422519_at   | -0.072936953 | 8.675881655 | -1.093789222 | 0.30127152  | 0.30127152  | -5.091465287 |
| 1443948_at   | -0.077824902 | 7.305222983 | -1.093757706 | 0.301284654 | 0.301284654 | -5.091494399 |
| 1423406_at   | 0.078392666  | 6.703551121 | 1.093722765  | 0.301299217 | 0.301299217 | -5.091526676 |
| 1433983_at   | 0.081687511  | 8.670641564 | 1.093677914  | 0.30131791  | 0.30131791  | -5.091568105 |
| 1451317_at   | 0.071376387  | 10.16948587 | 1.093640715  | 0.301333414 | 0.301333414 | -5.091602464 |
| 1425435_at   | -0.080503717 | 3.694324674 | -1.093584606 | 0.301356802 | 0.301356802 | -5.091654289 |
| 1416982_at   | 0.098358968  | 7.970726382 | 1.093554155  | 0.301369495 | 0.301369495 | -5.091682414 |
| 1449074_at   | 0.088634629  | 3.835625939 | 1.093495803  | 0.30139382  | 0.30139382  | -5.091736308 |
| 1452660_s_at | -0.10982814  | 8.726040669 | -1.093447501 | 0.301413956 | 0.301413956 | -5.091780917 |
| 1458673_at   | 0.124317223  | 3.806674027 | 1.093444341  | 0.301415274 | 0.301415274 | -5.091783836 |
| 1450798_at   | 0.088019496  | 4.182097705 | 1.093443028  | 0.301415821 | 0.301415821 | -5.091785049 |
| 1429796_at   | -0.113442647 | 7.476157256 | -1.093352455 | 0.301453582 | 0.301453582 | -5.091868694 |
| 1422837_at   | 0.147759623  | 7.138327417 | 1.093145438  | 0.301539905 | 0.301539905 | -5.092059858 |
| 1427839_at   | -0.124197661 | 3.843970915 | -1.093069458 | 0.301571593 | 0.301571593 | -5.092130012 |
| 1453022_at   | -0.144516033 | 6.604611456 | -1.093008342 | 0.301597083 | 0.301597083 | -5.09218644  |
| 1448878_at   | 0.094293049  | 7.541015639 | 1.0929414    | 0.301625005 | 0.301625005 | -5.092248244 |
| 1430871_at   | -0.090258739 | 4.767283967 | -1.092909776 | 0.301638196 | 0.301638196 | -5.092277439 |
| 1448465_at   | 0.086388018  | 8.574274267 | 1.092838845  | 0.301667785 | 0.301667785 | -5.092342922 |
| 1428994_s_at | -0.101269967 | 3.985903968 | -1.092768738 | 0.301697032 | 0.301697032 | -5.092407641 |
| 1441986_at   | 0.085572893  | 5.511594759 | 1.09275214   | 0.301703957 | 0.301703957 | -5.092422962 |
| 1437051_at   | 0.084912794  | 6.979264373 | 1.092722288  | 0.301716412 | 0.301716412 | -5.092450519 |
| 1458192_at   | 0.08843874   | 5.014549282 | 1.092717979  | 0.301718209 | 0.301718209 | -5.092454496 |
| 1445729_at   | -0.12893146  | 5.356876979 | -1.092611486 | 0.301762643 | 0.301762643 | -5.092552795 |
| 1454645_at   | -0.082734717 | 8.730483744 | -1.092533734 | 0.301795088 | 0.301795088 | -5.092624559 |
| 1417125_at   | 0.080537866  | 10.51898304 | 1.092490847  | 0.301812985 | 0.301812985 | -5.092664142 |
| 1424126_at   | -0.077489683 | 8.37561529  | -1.0924887   | 0.301813881 | 0.301813881 | -5.092666123 |
| 1425149_a_at | 0.123450982  | 8.42235287  | 1.092487412  | 0.301814419 | 0.301814419 | -5.092667313 |
| 1452829_at   | -0.208672629 | 8.866863309 | -1.092477465 | 0.30181857  | 0.30181857  | -5.092676493 |
| 1440062_at   | 0.075460611  | 4.994649838 | 1.092469396  | 0.301821937 | 0.301821937 | -5.09268394  |
| 1433942_at   | -0.092914944 | 7.723424329 | -1.092456923 | 0.301827143 | 0.301827143 | -5.092695452 |



|              |              |             |              |             |             |              |
|--------------|--------------|-------------|--------------|-------------|-------------|--------------|
| 1444672_at   | -0.087616138 | 3.443558494 | -1.092409043 | 0.301847126 | 0.301847126 | -5.092739641 |
| 1430610_at   | 0.067869102  | 4.541323634 | 1.092293794  | 0.301895229 | 0.301895229 | -5.092845999 |
| 1447963_at   | -0.093873068 | 3.558660578 | -1.092276612 | 0.301902401 | 0.301902401 | -5.092861855 |
| 1428662_a_at | 0.085528602  | 7.777254837 | 1.092266627  | 0.301906569 | 0.301906569 | -5.092871068 |
| 1419867_a_at | 0.112003868  | 8.935481156 | 1.092202236  | 0.301933448 | 0.301933448 | -5.092930488 |
| 1439122_at   | 0.169299447  | 9.749789251 | 1.092193482  | 0.301937103 | 0.301937103 | -5.092938566 |
| 1450476_at   | 0.116247806  | 4.064051254 | 1.092115562  | 0.301969632 | 0.301969632 | -5.093010465 |
| 1449685_s_at | -0.125443017 | 4.437141787 | -1.091987883 | 0.302022941 | 0.302022941 | -5.09312827  |
| 1455456_a_at | -0.110847526 | 8.235242339 | -1.091917815 | 0.302052199 | 0.302052199 | -5.093192915 |
| 1439670_at   | 0.090166167  | 3.261424122 | 1.091907239  | 0.302056615 | 0.302056615 | -5.093202672 |
| 1433854_at   | -0.134654282 | 8.566971379 | -1.091792837 | 0.302104391 | 0.302104391 | -5.093308213 |
| 1428322_a_at | 0.081350825  | 9.652735407 | 1.091788522  | 0.302106192 | 0.302106192 | -5.093312193 |
| 1417532_at   | -0.073728193 | 3.658488853 | -1.091704214 | 0.302141404 | 0.302141404 | -5.093389966 |
| 1443512_at   | 0.088733932  | 6.951111084 | 1.091600525  | 0.302184715 | 0.302184715 | -5.09348561  |
| 1420378_at   | 0.084816941  | 4.684038071 | 1.091555626  | 0.302203471 | 0.302203471 | -5.093527023 |
| 1437234_x_at | 0.10769872   | 9.569749784 | 1.091533835  | 0.302212574 | 0.302212574 | -5.093547123 |
| 1438436_at   | -0.11275189  | 4.868267702 | -1.091469882 | 0.302239291 | 0.302239291 | -5.093606108 |
| 1444702_at   | -0.085481655 | 4.803961605 | -1.091389589 | 0.302272838 | 0.302272838 | -5.093680159 |
| 1440780_x_at | -0.090454583 | 5.251625438 | -1.091380791 | 0.302276514 | 0.302276514 | -5.093688274 |
| 1455191_x_at | 0.115457521  | 7.888438048 | 1.091350756  | 0.302289063 | 0.302289063 | -5.093715973 |
| 1457875_at   | -0.109807988 | 5.6186201   | -1.091158834 | 0.302369263 | 0.302369263 | -5.093892957 |
| 1437747_at   | 0.095550923  | 7.421724036 | 1.091156108  | 0.302370402 | 0.302370402 | -5.093895471 |
| 1445370_at   | -0.094682761 | 6.143572403 | -1.091012994 | 0.302430217 | 0.302430217 | -5.094027431 |
| 1458524_at   | 0.207624689  | 5.307493416 | 1.09100587   | 0.302433195 | 0.302433195 | -5.094033999 |
| 1453080_at   | -0.094045441 | 4.650738445 | -1.090937218 | 0.302461891 | 0.302461891 | -5.094097295 |
| 1425827_at   | -0.085751736 | 5.191688616 | -1.090892287 | 0.302480674 | 0.302480674 | -5.09413872  |
| 1443409_at   | 0.114709545  | 4.554858318 | 1.090793955  | 0.302521783 | 0.302521783 | -5.094229373 |
| 1439862_at   | 0.071063712  | 3.742909021 | 1.09078088   | 0.302527249 | 0.302527249 | -5.094241426 |
| 1454740_at   | 0.091732464  | 9.253427817 | 1.090723864  | 0.302551088 | 0.302551088 | -5.094293986 |
| 1453823_a_at | 0.107544601  | 7.327360405 | 1.090658508  | 0.302578415 | 0.302578415 | -5.094354233 |
| 1438404_at   | 0.068263993  | 9.75729897  | 1.090631512  | 0.302589703 | 0.302589703 | -5.094379116 |
| 1419056_at   | -0.232787243 | 6.372119109 | -1.090607038 | 0.302599938 | 0.302599938 | -5.094401676 |
| 1445893_at   | -0.092094884 | 4.415179248 | -1.090565131 | 0.302617462 | 0.302617462 | -5.094440304 |
| 1459947_at   | -0.074740975 | 7.256629775 | -1.090518493 | 0.302636966 | 0.302636966 | -5.094483291 |
| 1422187_at   | 0.102124478  | 3.994824115 | 1.090494973  | 0.302646802 | 0.302646802 | -5.094504969 |
| 1424474_a_at | 0.119682597  | 8.915321372 | 1.090470612  | 0.30265699  | 0.30265699  | -5.094527422 |
| 1430864_at   | -0.076406523 | 6.203928433 | -1.090461934 | 0.30266062  | 0.30266062  | -5.09453542  |
| 1459638_at   | 0.114232048  | 5.370759365 | 1.090456507  | 0.30266289  | 0.30266289  | -5.094540422 |
| 1417904_at   | 0.077017813  | 7.544024635 | 1.09025187   | 0.302748486 | 0.302748486 | -5.094729016 |
| 1448623_at   | -0.100915996 | 9.28888008  | -1.090206843 | 0.302767322 | 0.302767322 | -5.094770509 |
| 1457503_at   | -0.097719765 | 4.953213472 | -1.090153424 | 0.30278967  | 0.30278967  | -5.094819734 |
| 1448694_at   | 0.075074783  | 8.777205403 | 1.090064828  | 0.302826738 | 0.302826738 | -5.094901371 |
| 1433017_at   | -0.12559948  | 5.338041635 | -1.090058574 | 0.302829354 | 0.302829354 | -5.094907133 |
| 1441308_at   | -0.074516606 | 4.396156793 | -1.090032793 | 0.302840142 | 0.302840142 | -5.094930888 |
| 1425884_at   | -0.10484275  | 6.262132341 | -1.089906859 | 0.302892839 | 0.302892839 | -5.095046918 |
| 1426143_at   | -0.244700733 | 4.466579167 | -1.08980296  | 0.302936321 | 0.302936321 | -5.09514264  |
| 1427959_at   | 0.104363548  | 8.067720595 | 1.089682476  | 0.30298675  | 0.30298675  | -5.095253631 |
| 1442170_at   | -0.09392601  | 6.975563006 | -1.089644673 | 0.303002574 | 0.303002574 | -5.095288454 |
| 1435254_at   | 0.088536643  | 7.94265992  | 1.0895643    | 0.30303622  | 0.30303622  | -5.095362488 |
| 1430274_a_at | -0.098757033 | 8.839290822 | -1.089470855 | 0.303075341 | 0.303075341 | -5.095448558 |
| 1433491_at   | -0.090172647 | 9.199657301 | -1.089405568 | 0.303102676 | 0.303102676 | -5.095508688 |
| 1415988_at   | -0.105646866 | 7.687187803 | -1.089380442 | 0.303113196 | 0.303113196 | -5.095531829 |
| 1421739_a_at | -0.139466876 | 5.524133112 | -1.08928332  | 0.303153865 | 0.303153865 | -5.095621274 |

|              |              |             |              |             |             |              |
|--------------|--------------|-------------|--------------|-------------|-------------|--------------|
| 1460015_at   | -0.102794193 | 4.662774534 | -1.089215804 | 0.303182139 | 0.303182139 | -5.09568345  |
| 1452915_at   | 0.096416024  | 9.455061515 | 1.089199385  | 0.303189015 | 0.303189015 | -5.09569857  |
| 1444062_at   | -0.098963692 | 6.13093099  | -1.089191473 | 0.303192329 | 0.303192329 | -5.095705856 |
| 1451510_s_at | 0.092977816  | 3.436942952 | 1.08918064   | 0.303196866 | 0.303196866 | -5.095715832 |
| 1423805_at   | -0.079913193 | 9.410214817 | -1.089134899 | 0.303216023 | 0.303216023 | -5.095757952 |
| 1452685_at   | -0.083610332 | 7.649522994 | -1.089128029 | 0.3032189   | 0.3032189   | -5.095764278 |
| 1457917_at   | 0.10503991   | 3.795099349 | 1.089109023  | 0.30322686  | 0.30322686  | -5.095781779 |
| 1420074_at   | -0.116192453 | 6.474693443 | -1.089072397 | 0.303242201 | 0.303242201 | -5.095815505 |
| 1432624_at   | -0.099788659 | 4.167380897 | -1.088992821 | 0.303275534 | 0.303275534 | -5.095888776 |
| 1448481_at   | -0.079030649 | 4.386512284 | -1.08893898  | 0.303298088 | 0.303298088 | -5.095938349 |
| 1431136_at   | 0.091405612  | 5.679238619 | 1.088919714  | 0.303306159 | 0.303306159 | -5.095956087 |
| 1432858_at   | -0.087385289 | 3.459628508 | -1.088885618 | 0.303320442 | 0.303320442 | -5.095987479 |
| 1422329_a_at | 0.096767762  | 6.47692617  | 1.088867114  | 0.303328194 | 0.303328194 | -5.096004515 |
| 1431221_at   | 0.072299936  | 4.809548758 | 1.088715177  | 0.303391853 | 0.303391853 | -5.096144391 |
| 1438207_at   | 0.22282985   | 8.012894769 | 1.088664322  | 0.303413163 | 0.303413163 | -5.096191206 |
| 1443653_at   | -0.090242028 | 6.004359535 | -1.088554071 | 0.303459365 | 0.303459365 | -5.096292692 |
| 1432691_at   | -0.136749672 | 3.964172103 | -1.088553463 | 0.303459619 | 0.303459619 | -5.096293251 |
| 1425021_a_at | -0.083226415 | 6.053370284 | -1.088512869 | 0.303476632 | 0.303476632 | -5.096330616 |
| 1416786_at   | -0.11296616  | 8.190335124 | -1.088471286 | 0.30349406  | 0.30349406  | -5.09636889  |
| 1453334_at   | 0.158675195  | 5.121119609 | 1.088463348  | 0.303497387 | 0.303497387 | -5.096376196 |
| 1451745_a_at | -0.085704916 | 9.984229074 | -1.088386075 | 0.303529776 | 0.303529776 | -5.096447317 |
| 1439163_at   | -0.121299381 | 6.018425195 | -1.088312383 | 0.303560666 | 0.303560666 | -5.096515139 |
| 1417418_s_at | -0.09043621  | 11.66400517 | -1.088301516 | 0.303565221 | 0.303565221 | -5.09652514  |
| 1429190_at   | -0.118322146 | 4.528518411 | -1.088273493 | 0.303576969 | 0.303576969 | -5.09655093  |
| 1438887_a_at | 0.070678162  | 7.945087867 | 1.088248963  | 0.303587252 | 0.303587252 | -5.096573504 |
| 1421625_a_at | 0.089121385  | 3.448768402 | 1.088165684  | 0.303622166 | 0.303622166 | -5.096650141 |
| 1446158_at   | 0.118439196  | 6.966324918 | 1.087954116  | 0.303710879 | 0.303710879 | -5.096844817 |
| 1427432_a_at | 0.071818283  | 11.97579419 | 1.0879262    | 0.303722586 | 0.303722586 | -5.096870502 |
| 1438647_x_at | -0.130226508 | 10.3038295  | -1.087776179 | 0.303785504 | 0.303785504 | -5.097008525 |
| 1425970_a_at | -0.106397304 | 3.724517275 | -1.08777457  | 0.303786179 | 0.303786179 | -5.097010005 |
| 1460337_at   | 0.108903067  | 7.934862603 | 1.087641411  | 0.303842035 | 0.303842035 | -5.097132503 |
| 1448901_at   | -0.09735191  | 9.441581369 | -1.087547324 | 0.303881506 | 0.303881506 | -5.09721905  |
| 1458843_at   | -0.130902194 | 6.202121598 | -1.087531812 | 0.303888014 | 0.303888014 | -5.097233318 |
| 1426214_at   | -0.086914843 | 5.584391141 | -1.087483016 | 0.303908487 | 0.303908487 | -5.097278201 |
| 1451128_s_at | 0.094492179  | 8.091723518 | 1.087402024  | 0.30394247  | 0.30394247  | -5.097352694 |
| 1430950_at   | 0.087939942  | 4.191538489 | 1.08734216   | 0.30396759  | 0.30396759  | -5.097407753 |
| 1458853_at   | -0.077842114 | 4.692074251 | -1.087334072 | 0.303970984 | 0.303970984 | -5.097415192 |
| 1437855_at   | 0.236885122  | 5.454397138 | 1.087334009  | 0.30397101  | 0.30397101  | -5.09741525  |
| 1419694_at   | -0.096504164 | 4.249073714 | -1.087319115 | 0.30397726  | 0.30397726  | -5.097428947 |
| 1446255_at   | 0.156311855  | 6.507049736 | 1.087199426  | 0.30402749  | 0.30402749  | -5.09753902  |
| 1435586_at   | -0.073876975 | 7.94993211  | -1.087092204 | 0.304072493 | 0.304072493 | -5.097637619 |
| 1447855_x_at | -0.090145687 | 3.238140812 | -1.087027017 | 0.304099856 | 0.304099856 | -5.09769756  |
| 1418946_at   | -0.116535228 | 6.314018699 | -1.087026777 | 0.304099956 | 0.304099956 | -5.097697781 |
| 1422910_s_at | 0.217074774  | 9.262183591 | 1.086935511  | 0.304138269 | 0.304138269 | -5.097781698 |
| 1421098_at   | -0.167734877 | 4.626333793 | -1.086877979 | 0.304162422 | 0.304162422 | -5.097834593 |
| 1447139_at   | 0.093381469  | 7.411595315 | 1.086750013  | 0.304216151 | 0.304216151 | -5.097952242 |
| 1421720_a_at | 0.097550406  | 7.306932581 | 1.086741486  | 0.304219732 | 0.304219732 | -5.097960081 |
| 1456147_at   | -0.108788297 | 4.401584358 | -1.086729934 | 0.304224582 | 0.304224582 | -5.097970701 |
| 1419702_at   | -0.09568391  | 7.982009395 | -1.086661314 | 0.304253397 | 0.304253397 | -5.098033784 |
| 1446225_at   | 0.138175925  | 3.835899282 | 1.086652815  | 0.304256966 | 0.304256966 | -5.098041596 |
| 1421802_at   | -0.072487521 | 3.294546609 | -1.086608281 | 0.304275668 | 0.304275668 | -5.098082535 |
| 1451364_at   | -0.077214955 | 7.648357402 | -1.086474181 | 0.304331989 | 0.304331989 | -5.098205799 |
| 1451186_at   | 0.12678904   | 5.068325239 | 1.086444286  | 0.304344545 | 0.304344545 | -5.098233276 |

|              |              |             |              |             |             |              |
|--------------|--------------|-------------|--------------|-------------|-------------|--------------|
| 1443655_s_at | 0.119548494  | 4.214825668 | 1.086389924  | 0.30436738  | 0.30436738  | -5.098283242 |
| 1430953_at   | 0.122090166  | 3.41547314  | 1.086365347  | 0.304377704 | 0.304377704 | -5.09830583  |
| 1432341_at   | -0.082649114 | 3.591861434 | -1.086272798 | 0.304416583 | 0.304416583 | -5.098390888 |
| 1419813_at   | 0.077761546  | 3.388620878 | 1.086257713  | 0.30442292  | 0.30442292  | -5.098404752 |
| 1416651_at   | -0.074704311 | 7.772732015 | -1.086194702 | 0.304449393 | 0.304449393 | -5.098462659 |
| 1422938_at   | -0.080861818 | 7.112665336 | -1.086193808 | 0.304449769 | 0.304449769 | -5.098463481 |
| 1447651_x_at | 0.074794464  | 4.040764512 | 1.08611401   | 0.304483297 | 0.304483297 | -5.098536811 |
| 1440884_s_at | -0.10601303  | 7.842393417 | -1.086103175 | 0.304487849 | 0.304487849 | -5.098546767 |
| 1423176_at   | -0.115528906 | 9.104734306 | -1.086099347 | 0.304489458 | 0.304489458 | -5.098550285 |
| 1427767_a_at | 0.079817292  | 3.188375685 | 1.086042868  | 0.30451319  | 0.30451319  | -5.098602184 |
| 1454023_a_at | -0.122692493 | 6.969488444 | -1.085940921 | 0.304556032 | 0.304556032 | -5.098695858 |
| 1451600_s_at | -0.105120785 | 3.762576911 | -1.085810667 | 0.304610776 | 0.304610776 | -5.098815532 |
| 1453946_a_at | 0.103863124  | 4.715324648 | 1.085791796  | 0.304618708 | 0.304618708 | -5.09883287  |
| 1459731_at   | -0.14256574  | 5.259788029 | -1.085753887 | 0.304634643 | 0.304634643 | -5.098867697 |
| 1458349_s_at | 0.091763067  | 3.721860724 | 1.08572462   | 0.304646945 | 0.304646945 | -5.098894585 |
| 1444228_s_at | -0.118928627 | 4.218061966 | -1.085575294 | 0.30470972  | 0.30470972  | -5.099031761 |
| 1436447_at   | 0.077736463  | 6.990116364 | 1.085566176  | 0.304713553 | 0.304713553 | -5.099040136 |
| 1435139_at   | 0.074990889  | 8.341589534 | 1.085486915  | 0.304746878 | 0.304746878 | -5.099112942 |
| 1421335_a_at | -0.112320256 | 6.835656629 | -1.085481687 | 0.304749076 | 0.304749076 | -5.099117744 |
| 1445724_at   | 0.09631106   | 5.912315494 | 1.085368624  | 0.304796618 | 0.304796618 | -5.099221592 |
| 1431750_at   | -0.068965446 | 4.516048081 | -1.085364219 | 0.304798471 | 0.304798471 | -5.099225638 |
| 1424361_at   | 0.105509092  | 6.72077191  | 1.085311196  | 0.304820769 | 0.304820769 | -5.099274336 |
| 1421556_at   | -0.071121883 | 4.23900482  | -1.085305453 | 0.304823184 | 0.304823184 | -5.099279611 |
| 1440630_at   | -0.083391405 | 4.706716406 | -1.085143275 | 0.304891392 | 0.304891392 | -5.099428549 |
| 1454625_at   | 0.139583329  | 7.292720784 | 1.085132655  | 0.30489586  | 0.30489586  | -5.099438302 |
| 1425509_at   | 0.072701192  | 7.601346738 | 1.085055264  | 0.304928413 | 0.304928413 | -5.099509369 |
| 1416444_at   | 0.220343445  | 4.485819952 | 1.08502669   | 0.304940433 | 0.304940433 | -5.099535607 |
| 1432543_a_at | 0.090357181  | 8.058425188 | 1.084960394  | 0.304968323 | 0.304968323 | -5.099596481 |
| 1458293_at   | 0.085734175  | 6.711843807 | 1.08495064   | 0.304972426 | 0.304972426 | -5.099605438 |
| 1442521_at   | 0.101155403  | 4.254147694 | 1.084928639  | 0.304981682 | 0.304981682 | -5.099625638 |
| 1420079_at   | -0.113316667 | 3.382924498 | -1.084807571 | 0.30503262  | 0.30503262  | -5.099736796 |
| 1456070_at   | 0.093200057  | 6.963809997 | 1.084765724  | 0.305050229 | 0.305050229 | -5.099775215 |
| 1460125_at   | -0.281542494 | 4.468871509 | -1.084660612 | 0.305094461 | 0.305094461 | -5.099871713 |
| 1453696_at   | -0.116284823 | 4.463572323 | -1.084615338 | 0.305113514 | 0.305113514 | -5.099913274 |
| 1456788_at   | -0.086508957 | 4.257273933 | -1.084530977 | 0.305149019 | 0.305149019 | -5.099990714 |
| 1453079_at   | -0.108577885 | 4.841819802 | -1.084504583 | 0.305160128 | 0.305160128 | -5.100014941 |
| 1438211_s_at | 0.113168106  | 7.109592696 | 1.084364135  | 0.305219248 | 0.305219248 | -5.100143854 |
| 1451799_at   | -0.246056044 | 4.861349188 | -1.084340668 | 0.305229127 | 0.305229127 | -5.100165392 |
| 1443346_at   | 0.096407521  | 4.290839807 | 1.084331229  | 0.305233101 | 0.305233101 | -5.100174056 |
| 1418251_at   | -0.134333274 | 4.607018284 | -1.084326281 | 0.305235183 | 0.305235183 | -5.100178597 |
| 1431901_a_at | 0.071545951  | 3.60736483  | 1.084270267  | 0.305258765 | 0.305258765 | -5.100230006 |
| 1416181_at   | -0.074979037 | 10.72951856 | -1.084189311 | 0.30529285  | 0.30529285  | -5.100304301 |
| 1447808_s_at | 0.228566636  | 6.743127988 | 1.084188066  | 0.305293374 | 0.305293374 | -5.100305444 |
| 1435910_at   | -0.096747586 | 7.396775341 | -1.084036288 | 0.305357285 | 0.305357285 | -5.100444726 |
| 1439325_at   | 0.10025498   | 7.107454865 | 1.083999488  | 0.305372782 | 0.305372782 | -5.100478493 |
| 1427552_a_at | -0.073554239 | 7.825960335 | -1.083962442 | 0.305388383 | 0.305388383 | -5.100512486 |
| 1455158_at   | 0.087413613  | 7.374505042 | 1.083946151  | 0.305395244 | 0.305395244 | -5.100527434 |
| 1452202_at   | 0.142177071  | 6.416729847 | 1.08390407   | 0.305412967 | 0.305412967 | -5.100566046 |
| 1444766_at   | -0.126726686 | 5.295551207 | -1.083872734 | 0.305426165 | 0.305426165 | -5.100594797 |
| 1460076_x_at | 0.110646572  | 5.131984775 | 1.083860611  | 0.305431272 | 0.305431272 | -5.10060592  |
| 1460081_at   | 0.108094891  | 5.377790692 | 1.083734804  | 0.305484264 | 0.305484264 | -5.100721343 |
| 1433845_x_at | 0.104648139  | 4.451274491 | 1.083725166  | 0.305488324 | 0.305488324 | -5.100730185 |
| 1425526_a_at | 0.138485569  | 9.653886141 | 1.083715603  | 0.305492352 | 0.305492352 | -5.100738959 |

|              |              |             |              |             |             |              |
|--------------|--------------|-------------|--------------|-------------|-------------|--------------|
| 1423014_at   | 0.160909946  | 4.483243521 | 1.083646837  | 0.305521321 | 0.305521321 | -5.100802044 |
| 1439031_at   | 0.118528518  | 6.569060736 | 1.083639924  | 0.305524234 | 0.305524234 | -5.100808385 |
| 1438664_at   | -0.106749018 | 8.898663499 | -1.083591046 | 0.305544826 | 0.305544826 | -5.100853224 |
| 1432988_at   | 0.078285774  | 4.715025121 | 1.083577647  | 0.305550471 | 0.305550471 | -5.100865515 |
| 1428571_at   | -0.423987664 | 8.421218742 | -1.083576873 | 0.305550798 | 0.305550798 | -5.100866226 |
| 1445760_at   | -0.075853302 | 4.985877093 | -1.083542757 | 0.305565172 | 0.305565172 | -5.100897521 |
| 1430346_at   | -0.069762069 | 5.715548623 | -1.083532339 | 0.305569561 | 0.305569561 | -5.100907077 |
| 1456570_at   | 0.106497007  | 4.968252232 | 1.083373109  | 0.305636657 | 0.305636657 | -5.10105313  |
| 1448687_at   | 0.131252894  | 8.152615307 | 1.083291634  | 0.305670993 | 0.305670993 | -5.101127856 |
| 1423851_a_at | 0.24233278   | 6.654061199 | 1.083170217  | 0.305722167 | 0.305722167 | -5.101239209 |
| 1427557_at   | -0.081053055 | 5.732959269 | -1.083161633 | 0.305725785 | 0.305725785 | -5.101247081 |
| 1458868_at   | 0.167271471  | 3.951843705 | 1.083093092  | 0.305754677 | 0.305754677 | -5.101309936 |
| 1416846_a_at | -0.073073357 | 10.18355963 | -1.083081403 | 0.305759604 | 0.305759604 | -5.101320655 |
| 1439223_at   | -0.082686869 | 3.536224635 | -1.083003775 | 0.305792329 | 0.305792329 | -5.101391839 |
| 1444598_at   | 0.081311416  | 7.172973375 | 1.082995902  | 0.305795648 | 0.305795648 | -5.101399058 |
| 1425349_a_at | -0.109677617 | 6.624020124 | -1.082987527 | 0.305799179 | 0.305799179 | -5.101406738 |
| 1433392_at   | -0.08015043  | 4.250292183 | -1.082980014 | 0.305802346 | 0.305802346 | -5.101413627 |
| 1435015_at   | -0.101340347 | 6.427612278 | -1.08294903  | 0.305815409 | 0.305815409 | -5.101442037 |
| 1452329_at   | -0.071774506 | 6.624962451 | -1.082946941 | 0.30581629  | 0.30581629  | -5.101443952 |
| 1433709_at   | -0.084450616 | 8.573133396 | -1.082917475 | 0.305828713 | 0.305828713 | -5.101470971 |
| 1432600_at   | 0.106463039  | 5.006913321 | 1.082892133  | 0.305839397 | 0.305839397 | -5.101494206 |
| 1444578_at   | 0.082614515  | 6.385723674 | 1.082819357  | 0.305870083 | 0.305870083 | -5.101560933 |
| 1437790_at   | 0.191700647  | 4.394165099 | 1.082809868  | 0.305874084 | 0.305874084 | -5.101569632 |
| 1440565_at   | -0.144552626 | 5.713346503 | -1.082704685 | 0.305918438 | 0.305918438 | -5.101666065 |
| 1456034_at   | -0.14834984  | 5.099091884 | -1.082693776 | 0.305923039 | 0.305923039 | -5.101676066 |
| 1456961_at   | 0.076869541  | 4.569796165 | 1.082663092  | 0.305935979 | 0.305935979 | -5.101704196 |
| 1446098_at   | -0.101948984 | 6.494170689 | -1.082642403 | 0.305944704 | 0.305944704 | -5.101723162 |
| 1432504_at   | -0.089969544 | 6.00291518  | -1.082641273 | 0.305945181 | 0.305945181 | -5.101724199 |
| 1441134_at   | 0.103273418  | 4.964815997 | 1.082628186  | 0.3059507   | 0.3059507   | -5.101736195 |
| 1450986_at   | 0.141081325  | 10.16424217 | 1.082559427  | 0.3059797   | 0.3059797   | -5.101799227 |
| 1421417_s_at | 0.083689736  | 5.328358737 | 1.082457693  | 0.306022612 | 0.306022612 | -5.101892482 |
| 1418814_s_at | 0.082343744  | 10.3732118  | 1.082431694  | 0.306033579 | 0.306033579 | -5.101916312 |
| 1429147_at   | -0.095036311 | 4.762659747 | -1.082391665 | 0.306050465 | 0.306050465 | -5.101953003 |
| 1418974_at   | -0.0897293   | 7.446516077 | -1.082391619 | 0.306050484 | 0.306050484 | -5.101953044 |
| 1448736_a_at | -0.076937728 | 9.921323997 | -1.082366009 | 0.306061288 | 0.306061288 | -5.101976518 |
| 1428547_at   | 0.168592504  | 7.47857418  | 1.082336632  | 0.306073681 | 0.306073681 | -5.102003443 |
| 1423211_at   | -0.087931125 | 10.10018729 | -1.082321048 | 0.306080256 | 0.306080256 | -5.102017727 |
| 1441386_at   | -0.132599356 | 5.737425011 | -1.0823014   | 0.306088545 | 0.306088545 | -5.102035735 |
| 1420343_at   | -0.079909836 | 2.953637102 | -1.082295155 | 0.30609118  | 0.30609118  | -5.102041458 |
| 1441366_at   | 0.073308403  | 3.563910224 | 1.082243631  | 0.306112918 | 0.306112918 | -5.10208868  |
| 1455166_at   | 0.067304346  | 9.975278023 | 1.082184833  | 0.306137727 | 0.306137727 | -5.102142566 |
| 1416767_a_at | -0.114810296 | 9.638219976 | -1.082145213 | 0.306154445 | 0.306154445 | -5.102178875 |
| 1452362_at   | 0.101775624  | 7.304108571 | 1.082114265  | 0.306167504 | 0.306167504 | -5.102207236 |
| 1429374_at   | -0.124599486 | 3.391471701 | -1.082096431 | 0.306175029 | 0.306175029 | -5.102223579 |
| 1429279_at   | -0.098645013 | 7.072052428 | -1.082073625 | 0.306184653 | 0.306184653 | -5.102244478 |
| 1437511_x_at | 0.088349693  | 8.013384702 | 1.082048313  | 0.306195335 | 0.306195335 | -5.102267673 |
| 1435031_at   | 0.067889787  | 7.138129311 | 1.082030721  | 0.306202759 | 0.306202759 | -5.102283794 |
| 1438105_at   | -0.082171564 | 6.498287046 | -1.081981152 | 0.306223678 | 0.306223678 | -5.102329215 |
| 1448948_at   | -0.07881333  | 8.444415568 | -1.08196561  | 0.306230237 | 0.306230237 | -5.102343456 |
| 1436475_at   | 0.117159746  | 6.492253929 | 1.081962801  | 0.306231423 | 0.306231423 | -5.10234603  |
| 1460439_at   | -0.091040992 | 7.790626483 | -1.081961338 | 0.306232041 | 0.306232041 | -5.102347371 |
| 1431180_at   | 0.111775784  | 5.54968767  | 1.08192778   | 0.306246204 | 0.306246204 | -5.10237812  |
| 1421673_s_at | 0.088486427  | 3.376432551 | 1.081917977  | 0.306250341 | 0.306250341 | -5.102387102 |

|                |              |             |              |             |             |              |
|----------------|--------------|-------------|--------------|-------------|-------------|--------------|
| 1446273_at     | -0.101865065 | 4.204047901 | -1.081854817 | 0.306277    | 0.306277    | -5.102444973 |
| 1430161_at     | 0.113082579  | 6.163950035 | 1.081851062  | 0.306278585 | 0.306278585 | -5.102448414 |
| 1460518_at     | -0.112525407 | 5.110053601 | -1.081810391 | 0.306295752 | 0.306295752 | -5.102485677 |
| 1427289_at     | -0.070470717 | 4.121554112 | -1.081775179 | 0.306310616 | 0.306310616 | -5.102517938 |
| 1434682_at     | 0.075809298  | 8.614640168 | 1.081712683  | 0.306336998 | 0.306336998 | -5.102575195 |
| 1421301_at     | 0.06939843   | 3.660939758 | 1.081706548  | 0.306339588 | 0.306339588 | -5.102580815 |
| 1435141_at     | 0.090474387  | 8.612626339 | 1.081671606  | 0.30635434  | 0.30635434  | -5.102612827 |
| 1425600_a_at   | -0.097981935 | 6.491273837 | -1.081614707 | 0.306378361 | 0.306378361 | -5.102664952 |
| 1451816_at     | 0.102398887  | 5.617469264 | 1.081372421  | 0.306480668 | 0.306480668 | -5.102886888 |
| 1453253_a_at   | -0.100602647 | 7.765737168 | -1.081298971 | 0.306511688 | 0.306511688 | -5.102954161 |
| 1445300_at     | -0.09054444  | 4.991667906 | -1.081232978 | 0.30653956  | 0.30653956  | -5.103014601 |
| 1453677_a_at   | -0.077983103 | 5.714115604 | -1.081046846 | 0.306618186 | 0.306618186 | -5.103185058 |
| 1437163_x_at   | 0.138207314  | 8.132993555 | 1.081022767  | 0.306628358 | 0.306628358 | -5.103207108 |
| 1436096_at     | 0.108931873  | 6.827096663 | 1.080719231  | 0.306756613 | 0.306756613 | -5.103485029 |
| 1428438_s_at   | 0.064584292  | 10.87794902 | 1.080645854  | 0.306787623 | 0.306787623 | -5.103552205 |
| 1435312_at     | -0.070105419 | 4.052495886 | -1.080638274 | 0.306790827 | 0.306790827 | -5.103559144 |
| 1429948_x_at   | -0.070056065 | 5.819121073 | -1.080614609 | 0.306800829 | 0.306800829 | -5.103580809 |
| 1447486_at     | -0.073125376 | 6.164812905 | -1.080607615 | 0.306803785 | 0.306803785 | -5.103587211 |
| 1430835_at     | -0.084656066 | 4.729975607 | -1.080526656 | 0.306838004 | 0.306838004 | -5.103661323 |
| 1424222_s_at   | -0.103140849 | 10.12754832 | -1.080505036 | 0.306847143 | 0.306847143 | -5.103681113 |
| 1454355_at     | -0.068035138 | 4.983033843 | -1.080493634 | 0.306851962 | 0.306851962 | -5.10369155  |
| 1448265_x_at   | 0.134169527  | 7.250325451 | 1.080461814  | 0.306865413 | 0.306865413 | -5.103720677 |
| 1430068_at     | 0.118379794  | 3.755659996 | 1.08039227   | 0.306894811 | 0.306894811 | -5.103784333 |
| 1430512_a_at   | -0.096235394 | 3.637428462 | -1.08038736  | 0.306896887 | 0.306896887 | -5.103788827 |
| 1421112_at     | -0.094045874 | 3.601166911 | -1.080371759 | 0.306903482 | 0.306903482 | -5.103803106 |
| 1448980_at     | -0.089052926 | 3.978449937 | -1.080356277 | 0.306910028 | 0.306910028 | -5.103817277 |
| 1428587_at     | 0.076497959  | 8.35863806  | 1.080297787  | 0.306934756 | 0.306934756 | -5.103870811 |
| 1421378_s_at   | -0.133771662 | 6.354236753 | -1.080264567 | 0.306948802 | 0.306948802 | -5.103901215 |
| 1422812_at     | 0.110715401  | 3.200684595 | 1.080223959  | 0.306965971 | 0.306965971 | -5.103938381 |
| 1440122_at     | 0.105645075  | 3.853365088 | 1.080192042  | 0.306979467 | 0.306979467 | -5.103967591 |
| 1425053_at     | 0.067539801  | 8.79145188  | 1.080045971  | 0.307041237 | 0.307041237 | -5.104101266 |
| 1434624_x_at   | -1.328705018 | 8.914569559 | -1.080029499 | 0.307048203 | 0.307048203 | -5.104116339 |
| 1443243_at     | 0.106862603  | 3.850307177 | 1.080026987  | 0.307049265 | 0.307049265 | -5.104118638 |
| AFFX-LysX-5_at | 0.097064712  | 3.945803629 | 1.080018686  | 0.307052775 | 0.307052775 | -5.104126233 |
| 1452090_a_at   | 0.074117711  | 3.099638977 | 1.079977735  | 0.307070095 | 0.307070095 | -5.104163706 |
| 1420718_at     | 0.134101146  | 6.164104296 | 1.079952637  | 0.30708071  | 0.30708071  | -5.104186671 |
| 1420507_a_at   | 0.077467711  | 8.315192656 | 1.079946768  | 0.307083192 | 0.307083192 | -5.104192042 |
| 1423777_at     | -0.074616744 | 6.812938076 | -1.079910747 | 0.307098428 | 0.307098428 | -5.104225002 |
| 1460501_at     | -0.088262747 | 3.206583893 | -1.079875646 | 0.307113275 | 0.307113275 | -5.104257119 |
| 1422297_at     | 0.075521447  | 3.424064815 | 1.079796294  | 0.30714684  | 0.30714684  | -5.104329722 |
| 1448049_at     | 0.126130398  | 7.839275581 | 1.079770488  | 0.307157757 | 0.307157757 | -5.104353333 |
| 1436839_at     | 0.111839259  | 8.325717124 | 1.079750098  | 0.307166383 | 0.307166383 | -5.104371988 |
| 1454899_at     | 0.089410725  | 9.261106056 | 1.079747203  | 0.307167607 | 0.307167607 | -5.104374636 |
| 1440337_at     | -0.132692812 | 3.633938739 | -1.079714452 | 0.307181462 | 0.307181462 | -5.1044046   |
| 1420873_at     | -0.118444473 | 6.977454872 | -1.079693478 | 0.307190336 | 0.307190336 | -5.104423789 |
| 1455035_s_at   | 0.072109767  | 10.40101067 | 1.079622745  | 0.307220261 | 0.307220261 | -5.104488498 |
| 1459371_at     | 0.120785804  | 7.502198804 | 1.079527178  | 0.307260698 | 0.307260698 | -5.104575922 |
| 1433714_at     | -0.108752979 | 5.543005409 | -1.079486401 | 0.307277952 | 0.307277952 | -5.104613223 |
| 1434572_at     | 0.085220361  | 6.46055724  | 1.079464633  | 0.307287164 | 0.307287164 | -5.104633135 |
| 1421939_a_at   | 0.078772582  | 7.36160732  | 1.079442667  | 0.307296459 | 0.307296459 | -5.104653226 |
| 1421325_at     | -0.082055268 | 4.331562674 | -1.079424642 | 0.307304087 | 0.307304087 | -5.104669714 |
| 1449218_at     | -0.133344543 | 5.043783805 | -1.079392541 | 0.307317672 | 0.307317672 | -5.104699076 |
| 1452327_at     | -0.086896377 | 8.016525055 | -1.079340955 | 0.307339504 | 0.307339504 | -5.10474626  |

|              |              |             |              |             |             |              |
|--------------|--------------|-------------|--------------|-------------|-------------|--------------|
| 1454553_at   | -0.095387313 | 4.028579645 | -1.079318239 | 0.307349118 | 0.307349118 | -5.104767037 |
| 1444798_at   | 0.085362906  | 3.555837343 | 1.079185499  | 0.307405302 | 0.307405302 | -5.104888439 |
| 1422288_at   | -0.099350569 | 6.535593018 | -1.07918025  | 0.307407524 | 0.307407524 | -5.10489324  |
| 1451809_s_at | 0.146604576  | 5.359885088 | 1.079159859  | 0.307416155 | 0.307416155 | -5.104911887 |
| 1420933_a_at | -0.079862191 | 7.658284377 | -1.07915708  | 0.307417331 | 0.307417331 | -5.104914429 |
| 1416821_at   | -0.079865255 | 7.002547575 | -1.079130485 | 0.30742859  | 0.30742859  | -5.104938751 |
| 1445499_at   | 0.081820048  | 8.757729647 | 1.079123885  | 0.307431384 | 0.307431384 | -5.104944787 |
| 1435745_at   | 0.097138453  | 9.352752999 | 1.079119443  | 0.307433264 | 0.307433264 | -5.104948849 |
| 1438592_at   | 0.127224486  | 6.323767962 | 1.079105322  | 0.307439241 | 0.307439241 | -5.104961762 |
| 1430934_at   | 0.071851092  | 4.228091568 | 1.079046469  | 0.307464156 | 0.307464156 | -5.105015582 |
| 1453682_at   | -0.066937034 | 6.242154533 | -1.079010443 | 0.307479408 | 0.307479408 | -5.105048525 |
| 1445266_at   | -0.086413649 | 3.992442552 | -1.07891077  | 0.30752161  | 0.30752161  | -5.105139667 |
| 1451611_at   | -0.132631684 | 7.087178644 | -1.078905243 | 0.30752395  | 0.30752395  | -5.10514472  |
| 1434774_at   | -0.086081492 | 7.016521341 | -1.078860373 | 0.307542949 | 0.307542949 | -5.105185748 |
| 1418044_at   | -0.079979592 | 8.305636848 | -1.078848745 | 0.307547873 | 0.307547873 | -5.105196379 |
| 1440919_at   | 0.080286038  | 6.457502867 | 1.078837211  | 0.307552757 | 0.307552757 | -5.105206925 |
| 1427224_at   | -0.108315169 | 3.818288762 | -1.078822432 | 0.307559015 | 0.307559015 | -5.105220437 |
| 1429828_at   | 0.087227576  | 3.844719784 | 1.078725601  | 0.307600021 | 0.307600021 | -5.105308968 |
| 1416305_at   | 0.098237382  | 7.445914238 | 1.078715655  | 0.307604233 | 0.307604233 | -5.105318062 |
| 1440346_at   | 0.079578972  | 9.309626693 | 1.078677499  | 0.307620393 | 0.307620393 | -5.105352945 |
| 1430683_at   | -0.085294124 | 5.234258113 | -1.078653269 | 0.307630655 | 0.307630655 | -5.105375096 |
| 1431259_at   | 0.110124517  | 6.782716703 | 1.078621939  | 0.307643924 | 0.307643924 | -5.105403738 |
| 1424139_at   | 0.073013855  | 10.79147199 | 1.078598134  | 0.307654007 | 0.307654007 | -5.1054255   |
| 1458717_at   | -0.080278915 | 3.44819913  | -1.078528864 | 0.307683348 | 0.307683348 | -5.105488824 |
| 1422447_at   | -0.075027691 | 7.087669191 | -1.078516309 | 0.307688666 | 0.307688666 | -5.1055003   |
| 1423589_at   | -0.089224956 | 8.233942862 | -1.078439016 | 0.307721408 | 0.307721408 | -5.105570953 |
| 1446382_at   | 0.08553572   | 3.675649581 | 1.078348309  | 0.307759836 | 0.307759836 | -5.105653863 |
| 1456680_at   | 0.085253224  | 4.516999476 | 1.07828033   | 0.307788638 | 0.307788638 | -5.105715995 |
| 1416817_at   | -0.073160969 | 6.881830559 | -1.07818442  | 0.307829277 | 0.307829277 | -5.105803651 |
| 1441447_at   | 0.115639299  | 4.111449243 | 1.07818365   | 0.307829603 | 0.307829603 | -5.105804355 |
| 1457904_at   | -0.08579624  | 3.631759139 | -1.078145257 | 0.307845872 | 0.307845872 | -5.105839442 |
| 1456909_at   | 0.112704923  | 7.90676644  | 1.078087165  | 0.30787049  | 0.30787049  | -5.10589253  |
| 1430672_at   | -0.094567025 | 6.073242057 | -1.07804925  | 0.307886558 | 0.307886558 | -5.105927178 |
| 1422954_at   | 0.078588893  | 6.466234895 | 1.077983517  | 0.307914417 | 0.307914417 | -5.105987245 |
| 1422518_at   | -0.085061921 | 8.449551638 | -1.077973065 | 0.307918847 | 0.307918847 | -5.105996796 |
| 1444156_at   | -0.119804013 | 3.932165224 | -1.077928696 | 0.307937653 | 0.307937653 | -5.106037338 |
| 1427168_a_at | 0.095675743  | 9.697743706 | 1.077877188  | 0.307959486 | 0.307959486 | -5.106084402 |
| 1457242_at   | -0.076237604 | 5.377259848 | -1.07786555  | 0.307964419 | 0.307964419 | -5.106095037 |
| 1453605_s_at | 0.100389591  | 5.841281341 | 1.077746903  | 0.308014715 | 0.308014715 | -5.106203441 |
| 1433503_at   | -0.075721251 | 7.498652129 | -1.077707546 | 0.3080314   | 0.3080314   | -5.106239397 |
| 1436410_at   | -0.076700458 | 3.970370124 | -1.077663063 | 0.30805026  | 0.30805026  | -5.106280037 |
| 1446386_at   | -0.085493697 | 6.700504376 | -1.077662958 | 0.308050304 | 0.308050304 | -5.106280133 |
| 1418885_a_at | 0.066319578  | 10.18865329 | 1.077520556  | 0.308110684 | 0.308110684 | -5.106410221 |
| 1435337_at   | 0.092422449  | 6.484032703 | 1.077506232  | 0.308116758 | 0.308116758 | -5.106423306 |
| 1416223_at   | 0.074163289  | 8.336795804 | 1.077493458  | 0.308122175 | 0.308122175 | -5.106434974 |
| 1448343_a_at | 0.072954351  | 10.50708401 | 1.077456773  | 0.308137731 | 0.308137731 | -5.106468485 |
| 1440281_at   | 0.099342221  | 6.353630167 | 1.077431944  | 0.308148261 | 0.308148261 | -5.106491165 |
| 1445736_at   | 0.10378199   | 3.635199399 | 1.077411933  | 0.308156747 | 0.308156747 | -5.106509443 |
| 1458379_at   | -0.070796393 | 3.469142202 | -1.07738603  | 0.308167733 | 0.308167733 | -5.106533103 |
| 1460649_at   | -0.144453095 | 8.201552506 | -1.077374078 | 0.308172802 | 0.308172802 | -5.10654402  |
| 1459385_at   | 0.145116438  | 4.80201646  | 1.077372647  | 0.308173408 | 0.308173408 | -5.106545327 |
| 1451584_at   | -0.081239674 | 3.362801067 | -1.077325419 | 0.308193439 | 0.308193439 | -5.106588464 |
| 1457686_at   | -0.111678581 | 5.866069215 | -1.077230631 | 0.308233643 | 0.308233643 | -5.106675037 |

|              |              |             |              |             |             |              |
|--------------|--------------|-------------|--------------|-------------|-------------|--------------|
| 1418329_at   | 0.085107178  | 7.80043521  | 1.077189955  | 0.308250897 | 0.308250897 | -5.106712185 |
| 1459887_at   | 0.156032316  | 6.386989049 | 1.077161206  | 0.308263092 | 0.308263092 | -5.106738441 |
| 1417393_a_at | 0.179924645  | 9.624708047 | 1.077139028  | 0.308272501 | 0.308272501 | -5.106758696 |
| 1434074_x_at | 0.092044487  | 3.353859843 | 1.077034159  | 0.30831699  | 0.30831699  | -5.106854463 |
| 1432621_at   | 0.096037771  | 3.789493383 | 1.077007642  | 0.30832824  | 0.30832824  | -5.106878677 |
| 1451968_at   | 0.075793796  | 8.088650115 | 1.076964027  | 0.308346745 | 0.308346745 | -5.106918504 |
| 1428060_at   | -0.072136286 | 4.58912019  | -1.076814211 | 0.308410316 | 0.308410316 | -5.107055298 |
| 1442783_x_at | -0.087955076 | 4.149977056 | -1.076808027 | 0.30841294  | 0.30841294  | -5.107060945 |
| 1432126_at   | -0.08795286  | 4.031031411 | -1.076760227 | 0.308433225 | 0.308433225 | -5.107104588 |
| 1456870_at   | 0.090586597  | 3.864515327 | 1.076749794  | 0.308437653 | 0.308437653 | -5.107114113 |
| 1416080_at   | -0.120841039 | 6.078352151 | -1.076703193 | 0.30845743  | 0.30845743  | -5.107156658 |
| 1445853_at   | -0.091826366 | 4.498176316 | -1.076633089 | 0.308487184 | 0.308487184 | -5.107220659 |
| 1447368_at   | 0.078809949  | 3.607499825 | 1.07659828   | 0.308501959 | 0.308501959 | -5.107252437 |
| 1445978_at   | -0.078707481 | 3.349087668 | -1.076583864 | 0.308508078 | 0.308508078 | -5.107265597 |
| 1437263_at   | 0.099858608  | 3.871317229 | 1.076459016  | 0.308561075 | 0.308561075 | -5.107379565 |
| 1432519_at   | -0.101374323 | 4.27332394  | -1.076411903 | 0.308581076 | 0.308581076 | -5.107422569 |
| 1419538_at   | 0.087385677  | 6.324398615 | 1.07640963   | 0.308582041 | 0.308582041 | -5.107424644 |
| 1431780_at   | -0.115417234 | 6.409449712 | -1.076408986 | 0.308582314 | 0.308582314 | -5.107425232 |
| 1430332_a_at | -0.081158125 | 7.366613141 | -1.076408122 | 0.308582681 | 0.308582681 | -5.10742602  |
| 1419209_at   | 0.101412195  | 4.884160504 | 1.076163407  | 0.308686586 | 0.308686586 | -5.107649372 |
| 1444024_at   | 0.077310055  | 6.158928321 | 1.076146803  | 0.308693637 | 0.308693637 | -5.107664525 |
| 1426728_x_at | -0.08355901  | 9.009939724 | -1.075952418 | 0.308776193 | 0.308776193 | -5.107841911 |
| 1427663_a_at | 0.097006549  | 8.61807034  | 1.075857252  | 0.308816617 | 0.308816617 | -5.107928746 |
| 1442249_at   | 0.089201013  | 4.309180314 | 1.075798438  | 0.308841602 | 0.308841602 | -5.107982409 |
| 1449030_at   | 0.126390195  | 4.219672701 | 1.075670796  | 0.30889583  | 0.30889583  | -5.108098863 |
| 1444201_at   | 0.108143011  | 5.44788046  | 1.075571605  | 0.308937976 | 0.308937976 | -5.108189353 |
| 1437848_x_at | 0.120743186  | 5.163800674 | 1.075398909  | 0.309011364 | 0.309011364 | -5.108346884 |
| 1438173_x_at | -0.088227311 | 8.352687571 | -1.075379056 | 0.309019802 | 0.309019802 | -5.108364993 |
| 1444157_a_at | -0.135377951 | 8.807601134 | -1.075342323 | 0.309035414 | 0.309035414 | -5.108398498 |
| 1456653_a_at | 0.08610511   | 7.870845404 | 1.075260004  | 0.309070402 | 0.309070402 | -5.108473578 |
| 1455123_at   | 0.09416181   | 3.41695326  | 1.075247283  | 0.30907581  | 0.30907581  | -5.108485181 |
| 1417610_at   | -0.111297998 | 5.40901101  | -1.07515034  | 0.309117019 | 0.309117019 | -5.108573593 |
| 1458142_at   | 0.083719594  | 5.328090207 | 1.075065187  | 0.30915322  | 0.30915322  | -5.108651249 |
| 1460418_x_at | -0.082131128 | 5.234412561 | -1.075028422 | 0.309168851 | 0.309168851 | -5.108684776 |
| 1450897_at   | 0.10634279   | 9.610779446 | 1.074924911  | 0.309212862 | 0.309212862 | -5.108779163 |
| 1424698_s_at | 0.113151716  | 3.756329162 | 1.074887779  | 0.309228651 | 0.309228651 | -5.108813021 |
| 1447358_at   | 0.077346569  | 3.358862569 | 1.074877158  | 0.309233168 | 0.309233168 | -5.108822706 |
| 1431071_at   | 0.135494894  | 6.552937944 | 1.07485054   | 0.309244487 | 0.309244487 | -5.108846976 |
| 1457507_at   | -0.111387772 | 3.549702006 | -1.074729552 | 0.30929594  | 0.30929594  | -5.108957287 |
| 1434424_at   | 0.12455278   | 7.957372377 | 1.07452629   | 0.309382396 | 0.309382396 | -5.109142589 |
| 1426239_s_at | 0.099731989  | 7.471030634 | 1.074462065  | 0.309409718 | 0.309409718 | -5.109201134 |
| 1452407_at   | -0.089497262 | 5.433613282 | -1.074364603 | 0.309451182 | 0.309451182 | -5.109289972 |
| 1430662_at   | -0.099183343 | 5.514362503 | -1.074359565 | 0.309453325 | 0.309453325 | -5.109294564 |
| 1441694_at   | 0.099436383  | 3.675869929 | 1.074336364  | 0.309463197 | 0.309463197 | -5.10931571  |
| 1452728_at   | -0.129412009 | 5.229255036 | -1.074244353 | 0.309502347 | 0.309502347 | -5.109399573 |
| 1450808_at   | -0.098151158 | 4.204872116 | -1.074068089 | 0.309577357 | 0.309577357 | -5.109560209 |
| 1447006_at   | -0.104494095 | 5.030022603 | -1.074034974 | 0.309591451 | 0.309591451 | -5.109590387 |
| 1422094_a_at | 0.074717573  | 8.452848481 | 1.074029432  | 0.30959381  | 0.30959381  | -5.109595436 |
| 1430558_at   | 0.072434977  | 9.169143424 | 1.073985184  | 0.309612643 | 0.309612643 | -5.109635758 |
| 1450030_at   | 0.066003939  | 7.092525071 | 1.073944001  | 0.309630172 | 0.309630172 | -5.109673285 |
| 1437510_x_at | 0.065119832  | 13.92577307 | 1.073900895  | 0.309648521 | 0.309648521 | -5.109712562 |
| 1438636_s_at | 0.177049798  | 7.423493883 | 1.073896005  | 0.309650602 | 0.309650602 | -5.109717018 |
| 1460509_at   | -0.077969428 | 3.977806839 | -1.073814271 | 0.309685396 | 0.309685396 | -5.10979149  |

|              |              |             |              |             |             |              |
|--------------|--------------|-------------|--------------|-------------|-------------|--------------|
| 1456493_at   | -0.07786059  | 4.796495386 | -1.073803418 | 0.309690016 | 0.309690016 | -5.109801379 |
| 1438295_at   | -0.096495205 | 4.457003633 | -1.073797926 | 0.309692354 | 0.309692354 | -5.109806382 |
| 1441566_at   | 0.07015851   | 4.705484    | 1.07361384   | 0.309770731 | 0.309770731 | -5.109974096 |
| 1434673_at   | 0.096101048  | 3.107303923 | 1.073609106  | 0.309772746 | 0.309772746 | -5.109978409 |
| 1450382_at   | -0.089848473 | 7.975036223 | -1.073558287 | 0.309794386 | 0.309794386 | -5.110024703 |
| 1445685_at   | 0.091641176  | 4.941486495 | 1.073547419  | 0.309799013 | 0.309799013 | -5.110034604 |
| 1460320_at   | 0.066029958  | 9.36153285  | 1.073518622  | 0.309811276 | 0.309811276 | -5.110060836 |
| 1426315_a_at | 0.101202591  | 6.840063827 | 1.073486537  | 0.30982494  | 0.30982494  | -5.110090063 |
| 1442948_at   | -0.082812559 | 3.471478301 | -1.073397353 | 0.309862921 | 0.309862921 | -5.110171301 |
| 1450174_at   | 0.088399958  | 4.877950759 | 1.073369943  | 0.309874595 | 0.309874595 | -5.110196267 |
| 1451343_at   | 0.093581397  | 8.596749464 | 1.073290855  | 0.309908281 | 0.309908281 | -5.110268301 |
| 1435871_at   | 0.202205159  | 6.374791931 | 1.073285675  | 0.309910488 | 0.309910488 | -5.11027302  |
| 1453400_at   | -0.082955971 | 5.574059775 | -1.073164053 | 0.309962296 | 0.309962296 | -5.110383787 |
| 1460190_at   | 0.071989187  | 7.776972306 | 1.073150051  | 0.309968261 | 0.309968261 | -5.110396539 |
| 1434369_a_at | -0.189549313 | 7.39302518  | -1.073118291 | 0.309981791 | 0.309981791 | -5.110425462 |
| 1429668_at   | 0.077994551  | 3.247693925 | 1.072990999  | 0.310036024 | 0.310036024 | -5.110541379 |
| 1443966_at   | 0.094152865  | 8.726094466 | 1.072900445  | 0.310074609 | 0.310074609 | -5.110623836 |
| 1443882_at   | -0.073728966 | 8.158508145 | -1.072880129 | 0.310083266 | 0.310083266 | -5.110642334 |
| 1447825_x_at | -0.129733715 | 6.730207613 | -1.072857883 | 0.310092746 | 0.310092746 | -5.11066259  |
| 1417943_at   | -0.106801066 | 4.258218155 | -1.07284762  | 0.31009712  | 0.31009712  | -5.110671935 |
| 1416567_s_at | 0.091967093  | 10.70029677 | 1.072791846  | 0.310120889 | 0.310120889 | -5.110722717 |
| 1431186_at   | -0.083143873 | 5.971651362 | -1.072789014 | 0.310122095 | 0.310122095 | -5.110725295 |
| 1433120_at   | -0.084509107 | 3.785856737 | -1.072753692 | 0.310137149 | 0.310137149 | -5.110757454 |
| 1436396_at   | -0.089048149 | 7.918553239 | -1.072605364 | 0.310200369 | 0.310200369 | -5.110892492 |
| 1441823_at   | 0.09548401   | 6.962465016 | 1.072592702  | 0.310205767 | 0.310205767 | -5.110904019 |
| 1426658_x_at | -0.10875777  | 9.943843155 | -1.07258077  | 0.310210853 | 0.310210853 | -5.110914881 |
| 1448626_at   | 0.092775725  | 7.489953714 | 1.072427916  | 0.310276015 | 0.310276015 | -5.111054024 |
| 1448850_a_at | 0.090950738  | 9.698296909 | 1.072414028  | 0.310281936 | 0.310281936 | -5.111066665 |
| 1457149_at   | -0.087037806 | 4.716367401 | -1.072359962 | 0.310304987 | 0.310304987 | -5.111115876 |
| 1443570_at   | 0.080759503  | 2.930321996 | 1.072194073  | 0.310375723 | 0.310375723 | -5.111266859 |
| 1435022_at   | 0.220513718  | 8.797174377 | 1.072192157  | 0.31037654  | 0.31037654  | -5.111268603 |
| 1457740_at   | 0.107456899  | 5.580411459 | 1.072181122  | 0.310381245 | 0.310381245 | -5.111278646 |
| 1451677_at   | -0.089599543 | 6.20996117  | -1.072148788 | 0.310395035 | 0.310395035 | -5.111308073 |
| 1449525_at   | 0.092401737  | 4.200465397 | 1.072137616  | 0.310399799 | 0.310399799 | -5.11131824  |
| 1429617_at   | -0.084628934 | 6.693596828 | -1.072117376 | 0.310408431 | 0.310408431 | -5.111336659 |
| 1453695_at   | 0.102864898  | 3.977571971 | 1.0721172    | 0.310408506 | 0.310408506 | -5.11133682  |
| 1443491_at   | -0.10674282  | 6.98789551  | -1.072089066 | 0.310420504 | 0.310420504 | -5.111362422 |
| 1428429_at   | -0.083475831 | 6.976054166 | -1.07202207  | 0.310449079 | 0.310449079 | -5.111423389 |
| 1426320_at   | -0.087035526 | 5.726592643 | -1.072019494 | 0.310450177 | 0.310450177 | -5.111425733 |
| 1447975_a_at | 0.082392718  | 6.898038916 | 1.071881431  | 0.310509068 | 0.310509068 | -5.111551362 |
| 1423095_s_at | 0.113548028  | 8.759198183 | 1.071831753  | 0.31053026  | 0.31053026  | -5.111596563 |
| 1433044_at   | -0.09060638  | 6.32185724  | -1.071747827 | 0.310566065 | 0.310566065 | -5.111672922 |
| 1440935_at   | -0.118409377 | 10.22116299 | -1.07165664  | 0.310604971 | 0.310604971 | -5.111755882 |
| 1426215_at   | 0.216110978  | 6.317267178 | 1.071646504  | 0.310609296 | 0.310609296 | -5.111765103 |
| 1427276_at   | 0.158532107  | 9.284219021 | 1.071382097  | 0.310722131 | 0.310722131 | -5.112005623 |
| 1427202_at   | -0.093666506 | 7.12043148  | -1.071330114 | 0.310744318 | 0.310744318 | -5.112052905 |
| 1427838_at   | -0.079866224 | 5.52519029  | -1.071316251 | 0.310750235 | 0.310750235 | -5.112065513 |
| 1423513_at   | 0.076787596  | 9.331017308 | 1.071304871  | 0.310755093 | 0.310755093 | -5.112075864 |
| 1425742_a_at | 0.071077014  | 12.31322797 | 1.071258195  | 0.310775017 | 0.310775017 | -5.112118317 |
| 1425241_a_at | 0.159195071  | 10.30950132 | 1.071243112  | 0.310781455 | 0.310781455 | -5.112132034 |
| 1452550_a_at | -0.071803308 | 7.876071375 | -1.071230564 | 0.310786811 | 0.310786811 | -5.112143447 |
| 1441838_at   | -0.120692265 | 6.918953142 | -1.071203905 | 0.310798191 | 0.310798191 | -5.112167692 |
| 1455283_x_at | 0.072865248  | 11.39753315 | 1.071113382  | 0.310836836 | 0.310836836 | -5.112250016 |



|                |              |             |              |             |             |              |
|----------------|--------------|-------------|--------------|-------------|-------------|--------------|
| 1435438_at     | 0.081509417  | 3.855706587 | 1.071097996  | 0.310843405 | 0.310843405 | -5.112264009 |
| 1452174_at     | -0.11834983  | 8.843802891 | -1.071070201 | 0.310855272 | 0.310855272 | -5.112289285 |
| 1427373_at     | 0.128983331  | 5.535115467 | 1.071054361  | 0.310862035 | 0.310862035 | -5.11230369  |
| 1427039_at     | -0.114960984 | 7.698501051 | -1.070942359 | 0.310909858 | 0.310909858 | -5.112405536 |
| 1429303_at     | -0.090247697 | 3.946797459 | -1.07091607  | 0.310921083 | 0.310921083 | -5.112429441 |
| 1424774_s_at   | -0.068397113 | 6.168635767 | -1.07088534  | 0.310934206 | 0.310934206 | -5.112457382 |
| 1434954_at     | -0.064411571 | 7.390030091 | -1.07081473  | 0.310964359 | 0.310964359 | -5.112521583 |
| 1455786_at     | 0.118890242  | 6.357903291 | 1.070813378  | 0.310964937 | 0.310964937 | -5.112522812 |
| 1441021_at     | 0.093389013  | 5.96286989  | 1.07076702   | 0.310984735 | 0.310984735 | -5.112564961 |
| 1433826_at     | 0.070223779  | 7.362703449 | 1.070762133  | 0.310986822 | 0.310986822 | -5.112569405 |
| 1419490_at     | 0.091233773  | 6.007338124 | 1.070759733  | 0.310987848 | 0.310987848 | -5.112571587 |
| 1436572_at     | 0.090927883  | 7.69184374  | 1.070744131  | 0.310994511 | 0.310994511 | -5.112585771 |
| 1455640_a_at   | -0.074971647 | 9.409524451 | -1.070743222 | 0.310994899 | 0.310994899 | -5.112586598 |
| 1456651_a_at   | 0.09748429   | 8.69223545  | 1.070742689  | 0.310995127 | 0.310995127 | -5.112587082 |
| 1419958_at     | -0.082136381 | 3.88235281  | -1.070715663 | 0.311006669 | 0.311006669 | -5.112611653 |
| 1433699_at     | 0.110139798  | 7.092247738 | 1.070651266  | 0.311034175 | 0.311034175 | -5.112670198 |
| 1440839_x_at   | -0.067141425 | 4.200061175 | -1.070621265 | 0.31104699  | 0.31104699  | -5.112697473 |
| 1442141_at     | 0.08698079   | 7.278998117 | 1.070543827  | 0.311080069 | 0.311080069 | -5.112767869 |
| 1437783_x_at   | -0.105148025 | 11.53239108 | -1.070540745 | 0.311081385 | 0.311081385 | -5.11277067  |
| 1433237_at     | 0.074119136  | 4.664561247 | 1.070537024  | 0.311082975 | 0.311082975 | -5.112774053 |
| 1424747_at     | -0.091635474 | 5.064949801 | -1.070461634 | 0.311115182 | 0.311115182 | -5.112842583 |
| 1445962_at     | -0.096901899 | 3.526436088 | -1.070378922 | 0.31115052  | 0.31115052  | -5.112917765 |
| 1450566_at     | -0.092961386 | 3.661444682 | -1.070334255 | 0.311169604 | 0.311169604 | -5.112958363 |
| 1424495_a_at   | 0.102203167  | 7.891559268 | 1.070332904  | 0.311170182 | 0.311170182 | -5.112959592 |
| 1447107_at     | -0.09170387  | 5.036159449 | -1.070247931 | 0.31120649  | 0.31120649  | -5.113036821 |
| 1453248_at     | 0.150854713  | 5.671786017 | 1.070094027  | 0.311272262 | 0.311272262 | -5.11317669  |
| 1447904_s_at   | 0.095144845  | 10.81030807 | 1.070083035  | 0.31127696  | 0.31127696  | -5.113186679 |
| AFFX-LysX-3_at | 0.093213235  | 7.120604562 | 1.070080786  | 0.311277921 | 0.311277921 | -5.113188723 |
| 1453984_at     | -0.083748062 | 5.160245259 | -1.070047082 | 0.311292326 | 0.311292326 | -5.113219351 |
| 1432370_at     | -0.124049859 | 4.599717751 | -1.069968118 | 0.311326077 | 0.311326077 | -5.113291105 |
| 1438399_at     | -0.184295444 | 5.189693018 | -1.069904238 | 0.311353383 | 0.311353383 | -5.11334915  |
| 1435289_at     | -0.098678372 | 6.585445796 | -1.069873777 | 0.311366405 | 0.311366405 | -5.113376827 |
| 1449159_at     | -0.114508648 | 4.111634854 | -1.069794596 | 0.311400255 | 0.311400255 | -5.11344877  |
| 1442914_at     | 0.124036431  | 3.434915503 | 1.069728398  | 0.311428557 | 0.311428557 | -5.113508913 |
| 1426360_at     | 0.077416789  | 9.920826805 | 1.069726575  | 0.311429337 | 0.311429337 | -5.113510569 |
| 1424581_at     | -0.09165614  | 5.105946543 | -1.069688835 | 0.311445473 | 0.311445473 | -5.113544856 |
| 1428154_s_at   | -0.08512689  | 9.502206123 | -1.069659669 | 0.311457944 | 0.311457944 | -5.113571354 |
| 1436082_at     | 0.188138369  | 5.940430044 | 1.069639451  | 0.311466589 | 0.311466589 | -5.113589721 |
| 1424905_a_at   | -0.112618572 | 8.185717821 | -1.069501981 | 0.311525374 | 0.311525374 | -5.113714601 |
| 1456604_a_at   | 0.089696879  | 9.637543369 | 1.069490925  | 0.311530102 | 0.311530102 | -5.113724644 |
| 1440019_at     | 0.089059145  | 4.388242798 | 1.069434718  | 0.31155414  | 0.31155414  | -5.113775699 |
| 1424487_x_at   | 0.078615341  | 4.43810709  | 1.069367481  | 0.311582898 | 0.311582898 | -5.113836771 |
| 1425713_a_at   | 0.071146387  | 7.811985518 | 1.069292243  | 0.31161508  | 0.31161508  | -5.113905108 |
| 1424766_at     | -0.080514818 | 8.005095545 | -1.069286841 | 0.31161739  | 0.31161739  | -5.113910014 |
| 1434519_at     | -0.0790188   | 5.088958897 | -1.069257934 | 0.311629755 | 0.311629755 | -5.113936268 |
| 1445931_at     | 0.095417133  | 4.002860185 | 1.069251734  | 0.311632407 | 0.311632407 | -5.113941898 |
| 1448702_at     | -0.08667682  | 9.594937468 | -1.069227162 | 0.311642919 | 0.311642919 | -5.113964215 |
| 1419990_at     | -0.128610539 | 5.708042825 | -1.069209795 | 0.311650348 | 0.311650348 | -5.113979987 |
| 1437453_s_at   | -0.073207282 | 3.745107852 | -1.069194262 | 0.311656993 | 0.311656993 | -5.113994094 |
| 1451751_at     | 0.125364705  | 7.468476286 | 1.069160872  | 0.311671277 | 0.311671277 | -5.114024418 |
| 1431737_at     | 0.093249172  | 3.984717226 | 1.069076463  | 0.31170739  | 0.31170739  | -5.114101072 |
| 1431030_a_at   | 0.08251793   | 7.550409129 | 1.068956742  | 0.311758615 | 0.311758615 | -5.114209787 |
| 1429378_x_at   | 0.080422774  | 6.121865619 | 1.068946813  | 0.311762864 | 0.311762864 | -5.114218802 |

|                    |              |             |              |             |             |              |
|--------------------|--------------|-------------|--------------|-------------|-------------|--------------|
| 1435845_at         | -0.102630771 | 5.703548912 | -1.068901966 | 0.311782055 | 0.311782055 | -5.114259524 |
| 1451855_at         | 0.126563969  | 4.214553013 | 1.068831731  | 0.311812111 | 0.311812111 | -5.114323295 |
| 1421273_at         | 0.085776539  | 5.000079774 | 1.068751014  | 0.311846656 | 0.311846656 | -5.114396579 |
| 1459719_at         | 0.084247944  | 3.261071283 | 1.068597373  | 0.311912419 | 0.311912419 | -5.114536061 |
| 1447734_x_at       | -0.070813522 | 9.520647205 | -1.068573013 | 0.311922846 | 0.311922846 | -5.114558175 |
| 1424239_at         | -0.122519817 | 6.863112272 | -1.068469497 | 0.311967161 | 0.311967161 | -5.114652141 |
| 1459127_at         | -0.078028304 | 4.76904511  | -1.068443467 | 0.311978306 | 0.311978306 | -5.114675769 |
| 1458519_at         | -0.090356411 | 3.497021797 | -1.068422997 | 0.311987069 | 0.311987069 | -5.11469435  |
| 1452285_a_at       | 0.064202244  | 12.50555691 | 1.06840772   | 0.31199361  | 0.31199361  | -5.114708216 |
| 1447886_at         | -0.179389857 | 5.849939356 | -1.068399323 | 0.311997205 | 0.311997205 | -5.114715837 |
| 1433167_at         | -0.11575079  | 6.233535695 | -1.068337354 | 0.312023738 | 0.312023738 | -5.114772084 |
| 1422087_at         | -0.093144854 | 6.294451657 | -1.068297238 | 0.312040916 | 0.312040916 | -5.114808494 |
| AFFX-r2-Bs-thr-M_s | 0.16994643   | 6.55469161  | 1.068144204  | 0.31210645  | 0.31210645  | -5.11494738  |
| 1436827_at         | 0.087974286  | 8.166132682 | 1.068102454  | 0.31212433  | 0.31212433  | -5.114985268 |
| 1451371_at         | 0.09478788   | 5.13570248  | 1.068060839  | 0.312142154 | 0.312142154 | -5.115023032 |
| 1439328_at         | 0.073540455  | 7.408341719 | 1.06797032   | 0.312180925 | 0.312180925 | -5.115105171 |
| AFFX-r2-Bs-phe-3_ç | 0.091370671  | 6.989247769 | 1.067970281  | 0.312180942 | 0.312180942 | -5.115105206 |
| 1437443_at         | -0.098394089 | 6.274181177 | -1.067913417 | 0.3122053   | 0.3122053   | -5.115156803 |
| 1440490_at         | -0.092006729 | 5.768815097 | -1.067851816 | 0.312231689 | 0.312231689 | -5.115212696 |
| 1416367_at         | 0.082541896  | 8.081216812 | 1.067808422  | 0.31225028  | 0.31225028  | -5.115252068 |
| 1458672_at         | 0.071121539  | 3.655773407 | 1.067747527  | 0.312276369 | 0.312276369 | -5.115307315 |
| 1419132_at         | -0.152409848 | 7.213910798 | -1.067737049 | 0.312280858 | 0.312280858 | -5.115316822 |
| 1453830_at         | 0.084537621  | 3.989433523 | 1.06767338   | 0.312308138 | 0.312308138 | -5.115374584 |
| 1432940_at         | 0.10666411   | 5.672383059 | 1.06758779   | 0.312344813 | 0.312344813 | -5.115452229 |
| 1433008_at         | 0.096720845  | 3.242368628 | 1.067586879  | 0.312345204 | 0.312345204 | -5.115453056 |
| 1455615_at         | -0.0870379   | 6.292574229 | -1.067395831 | 0.31242708  | 0.31242708  | -5.115626353 |
| 1460304_a_at       | 0.096096699  | 7.090561186 | 1.067379003  | 0.312434292 | 0.312434292 | -5.115641616 |
| 1429635_at         | -0.076696854 | 3.771135835 | -1.067329426 | 0.312455542 | 0.312455542 | -5.115686582 |
| 1445318_at         | 0.095622311  | 3.50243654  | 1.067325941  | 0.312457036 | 0.312457036 | -5.115689744 |
| 1459224_at         | 0.098552038  | 5.136325529 | 1.067321503  | 0.312458938 | 0.312458938 | -5.115693768 |
| 1457012_at         | -0.088046527 | 4.962235078 | -1.067315086 | 0.312461689 | 0.312461689 | -5.115699588 |
| 1425687_at         | 0.077926393  | 5.253934412 | 1.067269646  | 0.312481167 | 0.312481167 | -5.115740801 |
| 1446233_at         | 0.072811247  | 4.247483323 | 1.067178122  | 0.312520402 | 0.312520402 | -5.115823805 |
| 1418241_at         | -0.091933387 | 8.241853997 | -1.067130648 | 0.312540755 | 0.312540755 | -5.115866858 |
| 1438063_at         | 0.137372964  | 7.390502984 | 1.067127854  | 0.312541952 | 0.312541952 | -5.115869392 |
| 1421515_at         | 0.064392863  | 3.997608424 | 1.067127174  | 0.312542244 | 0.312542244 | -5.115870008 |
| 1455541_a_at       | -0.103029019 | 4.422316812 | -1.067085388 | 0.312560159 | 0.312560159 | -5.115907902 |
| 1459260_at         | 0.115322264  | 4.333598696 | 1.067010769  | 0.312592153 | 0.312592153 | -5.115975567 |
| 1434820_s_at       | -0.133424115 | 8.610386725 | -1.06699212  | 0.312600149 | 0.312600149 | -5.115992477 |
| 1420517_at         | 0.079371746  | 3.992606887 | 1.066938454  | 0.312623161 | 0.312623161 | -5.116041138 |
| 1440090_at         | 0.073798558  | 7.919309038 | 1.066930977  | 0.312626367 | 0.312626367 | -5.116047918 |
| 1456533_at         | -0.072765821 | 7.999737297 | -1.066902211 | 0.312638703 | 0.312638703 | -5.116074    |
| 1434217_at         | -0.074781177 | 8.718887998 | -1.066859874 | 0.312656858 | 0.312656858 | -5.116112387 |
| 1431500_at         | 0.068696735  | 3.623441507 | 1.066852637  | 0.312659962 | 0.312659962 | -5.116118949 |
| 1455392_at         | -0.165684736 | 5.375347811 | -1.066732075 | 0.312711669 | 0.312711669 | -5.116228255 |
| 1452214_at         | 0.081661746  | 9.923904175 | 1.066676932  | 0.31273532  | 0.31273532  | -5.116278247 |
| 1426144_x_at       | -0.150014637 | 3.847765825 | -1.066621962 | 0.312758899 | 0.312758899 | -5.11632808  |
| 1452405_x_at       | 0.094881758  | 5.209658428 | 1.066582425  | 0.312775859 | 0.312775859 | -5.11636392  |
| 1429729_at         | 0.194585321  | 4.005347275 | 1.066560793  | 0.312785139 | 0.312785139 | -5.11638353  |
| 1452921_at         | -0.082662317 | 7.483467632 | -1.066556624 | 0.312786927 | 0.312786927 | -5.116387309 |
| 1439050_at         | 0.09869494   | 6.475063564 | 1.066477864  | 0.312820716 | 0.312820716 | -5.116458702 |
| 1452864_at         | -0.0877067   | 7.497776787 | -1.06643782  | 0.312837895 | 0.312837895 | -5.116494999 |
| 1434372_at         | -0.113069562 | 3.860519157 | -1.066412702 | 0.312848672 | 0.312848672 | -5.116517766 |

|              |              |             |              |             |             |              |
|--------------|--------------|-------------|--------------|-------------|-------------|--------------|
| 1430297_a_at | -0.088330944 | 6.628716213 | -1.066344493 | 0.312877938 | 0.312877938 | -5.116579589 |
| 1427098_at   | -0.069088634 | 7.396226729 | -1.066339448 | 0.312880103 | 0.312880103 | -5.116584162 |
| 1431412_at   | 0.161361202  | 6.069865144 | 1.066336486  | 0.312881374 | 0.312881374 | -5.116586847 |
| 1443372_at   | -0.103106213 | 4.170869364 | -1.066332453 | 0.312883105 | 0.312883105 | -5.116590502 |
| 1430484_at   | -0.094341108 | 3.463856361 | -1.066324198 | 0.312886647 | 0.312886647 | -5.116597984 |
| 1427372_at   | -0.098392253 | 4.137163925 | -1.066297611 | 0.312898055 | 0.312898055 | -5.11662208  |
| 1424589_s_at | 0.143449141  | 6.922409831 | 1.06627206   | 0.312909019 | 0.312909019 | -5.116645237 |
| 1451018_at   | 0.087848465  | 8.539024008 | 1.066268943  | 0.312910356 | 0.312910356 | -5.116648062 |
| 1446313_at   | 0.123784396  | 5.251938567 | 1.066243974  | 0.312921071 | 0.312921071 | -5.116670691 |
| 1425137_a_at | -0.091680393 | 3.798653967 | -1.066238154 | 0.312923569 | 0.312923569 | -5.116675966 |
| 1419994_s_at | 0.07811941   | 8.824322993 | 1.066230099  | 0.312927025 | 0.312927025 | -5.116683266 |
| 1421494_at   | -0.104613542 | 3.314145502 | -1.066195392 | 0.312941919 | 0.312941919 | -5.11671472  |
| 1430339_at   | -0.175312558 | 5.051706653 | -1.066080212 | 0.312991352 | 0.312991352 | -5.116819099 |
| 1455777_x_at | 0.133937219  | 9.070002534 | 1.066064004  | 0.312998308 | 0.312998308 | -5.116833786 |
| 1421506_at   | 0.292912069  | 5.450714006 | 1.066018959  | 0.313017642 | 0.313017642 | -5.116874604 |
| 1444004_at   | 0.14284313   | 10.03039598 | 1.065987017  | 0.313031353 | 0.313031353 | -5.116903547 |
| 1459086_at   | -0.074373778 | 3.384625567 | -1.065982735 | 0.313033191 | 0.313033191 | -5.116907427 |
| 1420649_at   | 0.103716844  | 8.673505539 | 1.065966679  | 0.313040083 | 0.313040083 | -5.116921976 |
| 1443451_at   | -0.106589429 | 4.655683283 | -1.065936427 | 0.313053069 | 0.313053069 | -5.116949387 |
| 1458046_at   | 0.094218798  | 3.562568655 | 1.0658792    | 0.313077635 | 0.313077635 | -5.117001239 |
| 1445186_at   | -0.117028263 | 5.002067152 | -1.065778482 | 0.313120874 | 0.313120874 | -5.117092491 |
| 1419919_at   | 0.093552279  | 4.214638922 | 1.065764532  | 0.313126864 | 0.313126864 | -5.11710513  |
| 1452154_at   | -0.080972587 | 9.448099607 | -1.065695376 | 0.313156556 | 0.313156556 | -5.117167782 |
| 1450439_at   | -0.155740684 | 7.420336346 | -1.065664573 | 0.313169783 | 0.313169783 | -5.117195688 |
| 1448125_at   | -0.095035128 | 3.289992702 | -1.06563758  | 0.313181373 | 0.313181373 | -5.117220141 |
| 1455331_at   | -0.081068891 | 6.917936458 | -1.065530283 | 0.313227449 | 0.313227449 | -5.117317338 |
| 1458109_at   | -0.125389715 | 3.613322404 | -1.065488471 | 0.313245406 | 0.313245406 | -5.117355211 |
| 1430580_at   | 0.130728376  | 4.619766833 | 1.065323771  | 0.313316145 | 0.313316145 | -5.117504389 |
| 1433344_at   | 0.122922807  | 4.798755788 | 1.06532122   | 0.31331724  | 0.31331724  | -5.117506698 |
| 1446757_at   | -0.073674045 | 5.637659362 | -1.065208229 | 0.313365778 | 0.313365778 | -5.11760903  |
| 1424138_at   | 0.082572396  | 9.499392779 | 1.065177395  | 0.313379024 | 0.313379024 | -5.117636954 |
| 1441434_at   | -0.103546427 | 4.513590753 | -1.065157423 | 0.313387604 | 0.313387604 | -5.11765504  |
| 1441192_at   | 0.132846178  | 5.997032783 | 1.065150297  | 0.313390666 | 0.313390666 | -5.117661493 |
| 1445173_at   | -0.114553594 | 6.236385676 | -1.065142002 | 0.313394229 | 0.313394229 | -5.117669005 |
| 1443591_at   | -0.098164171 | 4.976141766 | -1.06508213  | 0.313419953 | 0.313419953 | -5.117723223 |
| 1434540_a_at | 0.180370474  | 11.03859526 | 1.065081277  | 0.313420319 | 0.313420319 | -5.117723995 |
| 1454872_at   | 0.074029653  | 9.56722287  | 1.065074979  | 0.313423025 | 0.313423025 | -5.117729698 |
| 1455350_at   | -0.130245488 | 6.077530258 | -1.06506921  | 0.313425504 | 0.313425504 | -5.117734922 |
| 1428922_at   | 0.179088876  | 8.877181262 | 1.064962809  | 0.313471222 | 0.313471222 | -5.117831268 |
| 1446439_at   | -0.136094861 | 5.516694174 | -1.06493477  | 0.313483271 | 0.313483271 | -5.117856657 |
| 1425744_a_at | -0.081044448 | 3.721679458 | -1.064902575 | 0.313497106 | 0.313497106 | -5.117885808 |
| 1448186_at   | -0.093226877 | 4.52604037  | -1.064857288 | 0.313516567 | 0.313516567 | -5.117926811 |
| 1422976_x_at | -0.084373458 | 10.48011063 | -1.06485405  | 0.313517959 | 0.313517959 | -5.117929743 |
| 1418593_at   | 0.067581027  | 8.566291857 | 1.064715041  | 0.313577703 | 0.313577703 | -5.118055594 |
| 1458774_at   | 0.095874751  | 3.900693855 | 1.064714087  | 0.313578113 | 0.313578113 | -5.118056458 |
| 1443432_at   | 0.076094518  | 3.289870515 | 1.064710688  | 0.313579574 | 0.313579574 | -5.118059535 |
| 1460083_at   | 0.067137299  | 5.628386846 | 1.06468997   | 0.313588479 | 0.313588479 | -5.118078291 |
| 1435253_at   | 0.085027798  | 7.777055051 | 1.064677584  | 0.313593803 | 0.313593803 | -5.118089504 |
| 1420127_s_at | -0.078985562 | 7.1265277   | -1.064649584 | 0.313605838 | 0.313605838 | -5.118114852 |
| 1426120_a_at | -0.084117929 | 3.829602547 | -1.064642091 | 0.313609059 | 0.313609059 | -5.118121634 |
| 1435191_at   | -0.070369745 | 5.144229281 | -1.064630054 | 0.313614233 | 0.313614233 | -5.118132531 |
| 1418505_at   | 0.084677135  | 10.66705315 | 1.064541277  | 0.313652396 | 0.313652396 | -5.118212894 |
| 1419297_at   | 0.073233925  | 4.471348736 | 1.064458876  | 0.313687822 | 0.313687822 | -5.118287481 |

|              |              |             |              |             |             |              |
|--------------|--------------|-------------|--------------|-------------|-------------|--------------|
| 1435662_at   | 0.06807713   | 8.573506258 | 1.064444891  | 0.313693834 | 0.313693834 | -5.11830014  |
| 1433579_at   | 0.10491063   | 9.664000816 | 1.064344405  | 0.313737039 | 0.313737039 | -5.118391089 |
| 1447037_at   | 0.137235351  | 4.113340364 | 1.064305477  | 0.313753778 | 0.313753778 | -5.118426321 |
| 1442100_at   | 0.10498282   | 5.82625467  | 1.064273089  | 0.313767705 | 0.313767705 | -5.118455633 |
| 1425441_at   | -0.075141454 | 4.705546492 | -1.064253306 | 0.313776212 | 0.313776212 | -5.118473537 |
| 1459550_at   | -0.095919047 | 3.852029517 | -1.064176305 | 0.313809326 | 0.313809326 | -5.118543222 |
| 1434616_at   | -0.107949533 | 5.198071178 | -1.064126007 | 0.313830958 | 0.313830958 | -5.118588739 |
| 1433711_s_at | 0.076958099  | 9.476941157 | 1.06407788   | 0.313851657 | 0.313851657 | -5.11863229  |
| 1449158_at   | -0.069627536 | 7.129611101 | -1.064069024 | 0.313855465 | 0.313855465 | -5.118640303 |
| 1415849_s_at | 0.079775941  | 12.9033329  | 1.064036626  | 0.313869401 | 0.313869401 | -5.11866962  |
| 1432396_at   | -0.089874222 | 3.695616499 | -1.063961262 | 0.313901818 | 0.313901818 | -5.118737813 |
| 1420884_at   | -0.648813342 | 7.18156225  | -1.063889592 | 0.313932648 | 0.313932648 | -5.11880266  |
| 1417764_at   | 0.101096771  | 10.13598553 | 1.063795031  | 0.313973329 | 0.313973329 | -5.118888213 |
| 1444545_at   | 0.083820713  | 6.69119449  | 1.063745603  | 0.313994595 | 0.313994595 | -5.118932931 |
| 1416173_at   | 0.077153366  | 7.140061103 | 1.063726815  | 0.314002679 | 0.314002679 | -5.118949928 |
| 1443853_x_at | 0.098791224  | 3.715010007 | 1.063717943  | 0.314006496 | 0.314006496 | -5.118957955 |
| 1426052_at   | 0.116576767  | 6.381271231 | 1.06368056   | 0.314022581 | 0.314022581 | -5.118991773 |
| 1419028_at   | -0.327133814 | 6.465743279 | -1.063600523 | 0.314057021 | 0.314057021 | -5.119064176 |
| 1445861_at   | -0.065283289 | 6.250883816 | -1.063599889 | 0.314057294 | 0.314057294 | -5.119064749 |
| 1416981_at   | 0.123730466  | 8.483927342 | 1.063569485  | 0.314070378 | 0.314070378 | -5.119092252 |
| 1426613_a_at | 0.073068064  | 10.70956393 | 1.06347272   | 0.314112021 | 0.314112021 | -5.11917978  |
| 1418740_at   | 0.113773607  | 5.32968588  | 1.063455178  | 0.314119571 | 0.314119571 | -5.119195646 |
| 1422990_at   | 0.169077715  | 6.194556715 | 1.06344723   | 0.314122992 | 0.314122992 | -5.119202836 |
| 1418805_at   | -0.087311356 | 5.613267153 | -1.063443932 | 0.314124411 | 0.314124411 | -5.119205819 |
| 1425604_at   | -0.084824525 | 4.02074131  | -1.063326861 | 0.3141748   | 0.3141748   | -5.119311704 |
| 1445928_at   | 0.230566858  | 7.652124247 | 1.063296658  | 0.314187801 | 0.314187801 | -5.119339019 |
| 1450913_at   | -0.08437508  | 7.721761121 | -1.06314386  | 0.314253579 | 0.314253579 | -5.119477202 |
| 1441333_at   | 0.117285115  | 6.256854925 | 1.063130314  | 0.314259411 | 0.314259411 | -5.119489451 |
| 1419800_at   | 0.101760395  | 3.655896591 | 1.063110888  | 0.314267775 | 0.314267775 | -5.119507018 |
| 1449848_at   | -0.150340307 | 6.167442598 | -1.063101735 | 0.314271716 | 0.314271716 | -5.119515295 |
| 1417387_at   | -0.114156977 | 9.150147908 | -1.063051922 | 0.314293163 | 0.314293163 | -5.119560339 |
| 1440392_at   | 0.104322503  | 7.502822129 | 1.063016191  | 0.314308548 | 0.314308548 | -5.119592647 |
| 1442010_at   | 0.07698501   | 5.823504146 | 1.063003885  | 0.314313847 | 0.314313847 | -5.119603775 |
| 1427218_at   | -0.082497628 | 6.559145128 | -1.062943078 | 0.31434003  | 0.31434003  | -5.119658756 |
| 1436965_at   | -0.096270473 | 9.352666333 | -1.062920628 | 0.314349698 | 0.314349698 | -5.119679054 |
| 1443435_at   | 0.202953679  | 5.837658439 | 1.062875913  | 0.314368954 | 0.314368954 | -5.119719483 |
| 1416455_a_at | -0.147819914 | 7.024139369 | -1.062841486 | 0.31438378  | 0.31438378  | -5.119750609 |
| 1436469_at   | 0.140808651  | 4.098612266 | 1.062825449  | 0.314390686 | 0.314390686 | -5.119765107 |
| 1428871_at   | -0.081465776 | 9.905692639 | -1.062818279 | 0.314393774 | 0.314393774 | -5.119771589 |
| 1449002_at   | 0.074848732  | 8.316863136 | 1.062787527  | 0.314407019 | 0.314407019 | -5.119799392 |
| 1419757_at   | -0.105458093 | 7.582287823 | -1.062772572 | 0.31441346  | 0.31441346  | -5.119812912 |
| 1436268_at   | -0.085811752 | 5.253416983 | -1.062754353 | 0.314421307 | 0.314421307 | -5.119829383 |
| 1444476_at   | 0.080620336  | 3.077280368 | 1.062704655  | 0.314442712 | 0.314442712 | -5.119874312 |
| 1424419_at   | 0.086509885  | 7.688415094 | 1.062669017  | 0.314458063 | 0.314458063 | -5.119906529 |
| 1416923_a_at | 0.07552048   | 10.07891135 | 1.062656261  | 0.314463557 | 0.314463557 | -5.11991806  |
| 1441470_at   | -0.13148288  | 4.124169495 | -1.062649984 | 0.314466261 | 0.314466261 | -5.119923734 |
| 1436238_at   | 0.088034783  | 4.242511883 | 1.062566322  | 0.3145023   | 0.3145023   | -5.119999361 |
| 1427445_a_at | -0.619877711 | 9.205982716 | -1.062544525 | 0.31451169  | 0.31451169  | -5.120019063 |
| 1416636_at   | 0.073040625  | 11.44277919 | 1.062516333  | 0.314523835 | 0.314523835 | -5.120044546 |
| 1445397_at   | -0.099664526 | 5.346104293 | -1.062293515 | 0.314619838 | 0.314619838 | -5.120245934 |
| 1420102_at   | -0.084860515 | 3.344759527 | -1.06219842  | 0.314660818 | 0.314660818 | -5.120331873 |
| 1418780_at   | 0.104290778  | 7.130216893 | 1.062147183  | 0.314682899 | 0.314682899 | -5.120378174 |
| 1427027_a_at | 0.086827368  | 9.400721144 | 1.062115564  | 0.314696526 | 0.314696526 | -5.120406747 |

|              |              |             |              |             |             |              |
|--------------|--------------|-------------|--------------|-------------|-------------|--------------|
| 1453006_at   | 0.095685999  | 5.812618676 | 1.062065586  | 0.314718067 | 0.314718067 | -5.120451909 |
| 1460126_at   | 0.155966602  | 7.867449066 | 1.062021852  | 0.314736917 | 0.314736917 | -5.120491425 |
| 1454602_s_at | 0.098943842  | 9.17378427  | 1.061999981  | 0.314746345 | 0.314746345 | -5.120511188 |
| 1442093_at   | -0.132782999 | 3.740686676 | -1.061994659 | 0.314748639 | 0.314748639 | -5.120515997 |
| 1442892_at   | -0.129755896 | 5.528176149 | -1.061935455 | 0.314774159 | 0.314774159 | -5.12056949  |
| 1425265_a_at | -0.077749334 | 9.630449224 | -1.061843838 | 0.314813655 | 0.314813655 | -5.120652265 |
| 1420252_at   | -0.080598    | 3.604095518 | -1.061832677 | 0.314818466 | 0.314818466 | -5.120662348 |
| 1416673_at   | -0.13596731  | 4.595911248 | -1.061756108 | 0.314851478 | 0.314851478 | -5.120731523 |
| 1458287_at   | -0.091058804 | 4.718624738 | -1.061717842 | 0.314867977 | 0.314867977 | -5.120766092 |
| 1427192_a_at | 0.065158451  | 10.17725209 | 1.061707127  | 0.314872597 | 0.314872597 | -5.120775772 |
| 1452694_at   | -0.069052372 | 9.410385489 | -1.061693234 | 0.314878587 | 0.314878587 | -5.120788323 |
| 1425981_a_at | -0.074204616 | 8.028456116 | -1.061582139 | 0.314926492 | 0.314926492 | -5.120888678 |
| 1460463_at   | -0.084650808 | 3.842826727 | -1.061549068 | 0.314940754 | 0.314940754 | -5.12091855  |
| 1447311_at   | -0.082600353 | 5.685510928 | -1.061539929 | 0.314944695 | 0.314944695 | -5.120926805 |
| 1421220_at   | 0.069713007  | 5.478221063 | 1.061486925  | 0.314967554 | 0.314967554 | -5.120974681 |
| 1457265_at   | 0.075272313  | 7.287027351 | 1.061444922  | 0.314985669 | 0.314985669 | -5.121012619 |
| 1433633_at   | -0.064132134 | 8.103573794 | -1.061442906 | 0.314986539 | 0.314986539 | -5.12101444  |
| 1428609_at   | -0.083423565 | 4.579328413 | -1.061322005 | 0.315038686 | 0.315038686 | -5.121123633 |
| 1443455_at   | 0.098427368  | 5.325680208 | 1.061282882  | 0.315055562 | 0.315055562 | -5.121158966 |
| 1416978_at   | -0.08962559  | 8.98958651  | -1.061227146 | 0.315079605 | 0.315079605 | -5.1212093   |
| 1429946_at   | -0.110964721 | 4.540778062 | -1.061201547 | 0.315090649 | 0.315090649 | -5.121232417 |
| 1426634_at   | 0.121536115  | 4.114465047 | 1.061150978  | 0.315112465 | 0.315112465 | -5.121278082 |
| 1440102_at   | -0.122164997 | 5.675113094 | -1.061053101 | 0.315154694 | 0.315154694 | -5.121366464 |
| 1444423_at   | -0.102239437 | 4.033821066 | -1.061038613 | 0.315160945 | 0.315160945 | -5.121379545 |
| 1450242_at   | 0.0729346    | 5.451248108 | 1.061020117  | 0.315168926 | 0.315168926 | -5.121396246 |
| 1451583_a_at | 0.065217631  | 8.313631067 | 1.061012714  | 0.31517212  | 0.31517212  | -5.121402931 |
| 1443390_at   | -0.096955461 | 8.08362814  | -1.060972714 | 0.31518938  | 0.31518938  | -5.121439048 |
| 1419415_a_at | -0.080461869 | 9.432335706 | -1.060859536 | 0.31523822  | 0.31523822  | -5.121541231 |
| 1451348_at   | -0.093389007 | 5.385357699 | -1.060846757 | 0.315243735 | 0.315243735 | -5.121552769 |
| 1437728_at   | 0.162598695  | 8.969659837 | 1.060838963  | 0.315247098 | 0.315247098 | -5.121559805 |
| 1429690_at   | 0.10597541   | 7.838192886 | 1.060803393  | 0.31526245  | 0.31526245  | -5.121591918 |
| 1418318_at   | -0.124377703 | 7.433692637 | -1.06079335  | 0.315266784 | 0.315266784 | -5.121600985 |
| 1450636_s_at | -0.079174124 | 5.793377813 | -1.060761929 | 0.315280345 | 0.315280345 | -5.121629351 |
| 1446622_at   | 0.122593818  | 4.154271415 | 1.060704732  | 0.315305032 | 0.315305032 | -5.121680985 |
| 1417087_at   | 0.083360161  | 10.52386292 | 1.060646557  | 0.315330143 | 0.315330143 | -5.1217335   |
| 1419514_at   | -0.121352539 | 7.627172619 | -1.060633902 | 0.315335606 | 0.315335606 | -5.121744924 |
| 1442375_at   | -0.119214064 | 6.001769125 | -1.060554318 | 0.315369961 | 0.315369961 | -5.121816761 |
| 1424380_at   | -0.086004799 | 7.541809101 | -1.060537122 | 0.315377384 | 0.315377384 | -5.121832283 |
| 1415774_at   | -0.07895004  | 8.419814383 | -1.060427561 | 0.315424685 | 0.315424685 | -5.12193117  |
| 1459073_x_at | 0.107362769  | 3.828761043 | 1.060386787  | 0.31544229  | 0.31544229  | -5.121967971 |
| 1442043_at   | -0.098864073 | 4.674255331 | -1.060305458 | 0.315477407 | 0.315477407 | -5.12204137  |
| 1442801_x_at | 0.129213118  | 3.388265126 | 1.060291778  | 0.315483314 | 0.315483314 | -5.122053716 |
| 1425515_at   | -0.078429911 | 7.800373723 | -1.060263762 | 0.315495412 | 0.315495412 | -5.122078998 |
| 1433922_at   | 0.079604316  | 8.486751754 | 1.060247176  | 0.315502574 | 0.315502574 | -5.122093966 |
| 1437879_at   | -0.076254992 | 8.115633898 | -1.060213569 | 0.315517087 | 0.315517087 | -5.122124295 |
| 1425212_a_at | -0.117130716 | 7.397148979 | -1.06020127  | 0.315522398 | 0.315522398 | -5.122135393 |
| 1445862_at   | 0.08847239   | 8.339420312 | 1.060194436  | 0.31552535  | 0.31552535  | -5.12214156  |
| 1417606_a_at | -0.096116294 | 12.47388494 | -1.060172406 | 0.315534864 | 0.315534864 | -5.12216144  |
| 1446271_at   | 0.091937348  | 3.380557907 | 1.060140123  | 0.315548806 | 0.315548806 | -5.122190571 |
| 1454974_at   | -0.156797045 | 8.413411155 | -1.060093491 | 0.315568946 | 0.315568946 | -5.122232649 |
| 1435256_at   | 0.144137383  | 9.132400735 | 1.059995625  | 0.315611217 | 0.315611217 | -5.122320954 |
| 1452143_at   | -0.073547813 | 11.6116335  | -1.05998927  | 0.315613962 | 0.315613962 | -5.122326688 |
| 1451422_at   | -0.125470139 | 9.065584964 | -1.059915982 | 0.31564562  | 0.31564562  | -5.122392812 |

|              |              |             |              |             |             |              |
|--------------|--------------|-------------|--------------|-------------|-------------|--------------|
| 1426394_at   | 0.074813962  | 10.13720468 | 1.059910192  | 0.315648122 | 0.315648122 | -5.122398035 |
| 1416957_at   | -0.070300157 | 3.334178799 | -1.059859231 | 0.315670137 | 0.315670137 | -5.122444013 |
| 1420094_at   | -0.101446892 | 5.412801589 | -1.059824355 | 0.315685204 | 0.315685204 | -5.122475477 |
| 1454324_at   | 0.07478016   | 4.229525246 | 1.059819105  | 0.315687472 | 0.315687472 | -5.122480213 |
| 1426300_at   | -0.093783986 | 10.74219428 | -1.059803459 | 0.315694232 | 0.315694232 | -5.122494328 |
| 1446826_at   | -0.133779284 | 3.52104672  | -1.059777726 | 0.315705349 | 0.315705349 | -5.122517542 |
| 1433932_x_at | -0.116818781 | 9.170679499 | -1.059682449 | 0.315746516 | 0.315746516 | -5.122603492 |
| 1442932_at   | 0.080498272  | 4.137818555 | 1.059658622  | 0.315756811 | 0.315756811 | -5.122624985 |
| 1436181_at   | 0.180144503  | 8.080648902 | 1.059540366  | 0.315807913 | 0.315807913 | -5.122731654 |
| 1417111_at   | 0.086318484  | 8.64035747  | 1.059498202  | 0.315826135 | 0.315826135 | -5.122769685 |
| 1452319_at   | 0.077336866  | 7.154415972 | 1.059492274  | 0.315828697 | 0.315828697 | -5.122775031 |
| 1429889_at   | -0.114713994 | 3.792293826 | -1.059453769 | 0.315845338 | 0.315845338 | -5.122809761 |
| 1451581_at   | 0.102657408  | 3.494789205 | 1.059450795  | 0.315846624 | 0.315846624 | -5.122812443 |
| 1435781_at   | 0.066810523  | 8.133198375 | 1.059405505  | 0.315866198 | 0.315866198 | -5.12285329  |
| 1443453_at   | -0.076762494 | 4.042147068 | -1.059353547 | 0.315888656 | 0.315888656 | -5.12290015  |
| 1415798_at   | 0.109983347  | 6.920333479 | 1.059321905  | 0.315902333 | 0.315902333 | -5.122928686 |
| 1445829_at   | -0.07189117  | 5.842416776 | -1.059316495 | 0.315904672 | 0.315904672 | -5.122933565 |
| 1432930_at   | -0.070571105 | 5.826630088 | -1.059164307 | 0.315970461 | 0.315970461 | -5.123070806 |
| 1417653_at   | 0.122407869  | 5.241820131 | 1.059062591  | 0.316014438 | 0.316014438 | -5.123162523 |
| 1429002_at   | 0.0732763    | 9.473541625 | 1.05896553   | 0.316056407 | 0.316056407 | -5.123250037 |
| 1431609_a_at | -0.196213658 | 7.447065392 | -1.058862941 | 0.31610077  | 0.31610077  | -5.123342529 |
| 1435842_at   | 0.076848353  | 5.670104853 | 1.05874311   | 0.316152596 | 0.316152596 | -5.123450557 |
| 1444948_at   | 0.077880244  | 3.416338907 | 1.058709823  | 0.316166993 | 0.316166993 | -5.123480564 |
| 1418236_s_at | -0.088350866 | 7.381431775 | -1.058643573 | 0.31619565  | 0.31619565  | -5.123540283 |
| 1453066_at   | -0.072575413 | 6.118329139 | -1.05863398  | 0.316199799 | 0.316199799 | -5.123548929 |
| 1441194_at   | -0.07810373  | 3.5983291   | -1.058632573 | 0.316200408 | 0.316200408 | -5.123550198 |
| 1423978_at   | 0.179080295  | 8.716443822 | 1.058475389  | 0.316268406 | 0.316268406 | -5.123691874 |
| 1446942_at   | -0.087114816 | 3.36587759  | -1.058389053 | 0.31630576  | 0.31630576  | -5.123769686 |
| 1458579_at   | -0.098197245 | 4.380946666 | -1.058377279 | 0.316310854 | 0.316310854 | -5.123780297 |
| 1446165_at   | -0.067699072 | 6.361862813 | -1.058368737 | 0.31631455  | 0.31631455  | -5.123787995 |
| 1449531_at   | -0.124933377 | 9.705737366 | -1.058343534 | 0.316325455 | 0.316325455 | -5.123810709 |
| 1425144_at   | -0.086796151 | 3.898045066 | -1.058313063 | 0.31633864  | 0.31633864  | -5.123838169 |
| 1443835_x_at | -0.082595723 | 4.771257207 | -1.058236319 | 0.316371849 | 0.316371849 | -5.123907327 |
| 1425800_at   | -0.123083302 | 4.642010064 | -1.058222853 | 0.316377677 | 0.316377677 | -5.123919462 |
| 1425943_at   | -0.096831213 | 4.965033542 | -1.05795852  | 0.316492084 | 0.316492084 | -5.124157638 |
| 1449706_s_at | -0.08727375  | 5.570978924 | -1.057900602 | 0.316517156 | 0.316517156 | -5.124209819 |
| 1435633_at   | 0.072576784  | 8.643125021 | 1.057852395  | 0.316538025 | 0.316538025 | -5.124253248 |
| 1438744_at   | 0.075887846  | 7.977699882 | 1.057825776  | 0.316549549 | 0.316549549 | -5.124277229 |
| 1450251_a_at | 0.082145989  | 5.72477834  | 1.057813915  | 0.316554684 | 0.316554684 | -5.124287914 |
| 1427072_at   | -0.11193419  | 7.859687677 | -1.057734155 | 0.316589216 | 0.316589216 | -5.124359765 |
| 1427685_a_at | 0.112681331  | 5.70388566  | 1.057705326  | 0.316601699 | 0.316601699 | -5.124385734 |
| 1435649_at   | -0.116727897 | 6.680408119 | -1.057618285 | 0.316639388 | 0.316639388 | -5.124464138 |
| 1450321_at   | -0.090715268 | 7.094956334 | -1.057556131 | 0.316666303 | 0.316666303 | -5.124520121 |
| 1421175_at   | 0.080439687  | 3.550941046 | 1.0575358    | 0.316675107 | 0.316675107 | -5.124538433 |
| 1426427_at   | 0.08845224   | 6.997813057 | 1.057535104  | 0.316675409 | 0.316675409 | -5.12453906  |
| 1420461_at   | 0.105275602  | 6.147953145 | 1.057354439  | 0.316753656 | 0.316753656 | -5.124701771 |
| 1425964_x_at | 0.103350337  | 10.02021605 | 1.057345469  | 0.316757541 | 0.316757541 | -5.12470985  |
| 1449226_at   | -0.172856723 | 8.156927012 | -1.057315185 | 0.316770659 | 0.316770659 | -5.124737122 |
| 1449069_at   | 0.084509282  | 10.1407548  | 1.05718463   | 0.316827214 | 0.316827214 | -5.124854687 |
| 1425629_a_at | -0.0793646   | 7.805521222 | -1.057090258 | 0.316868101 | 0.316868101 | -5.124939662 |
| 1445453_at   | 0.137703808  | 5.707277117 | 1.057081831  | 0.316871751 | 0.316871751 | -5.124947249 |
| 1451856_at   | -0.083773358 | 5.688043413 | -1.057078748 | 0.316873087 | 0.316873087 | -5.124950025 |
| 1417893_at   | 0.084684668  | 8.537217132 | 1.056880356  | 0.316959054 | 0.316959054 | -5.125128642 |

|              |              |             |              |             |             |              |
|--------------|--------------|-------------|--------------|-------------|-------------|--------------|
| 1438099_at   | 0.077814841  | 4.165827843 | 1.056851729  | 0.31697146  | 0.31697146  | -5.125154414 |
| 1441532_at   | -0.131477526 | 4.34585505  | -1.056738024 | 0.317020739 | 0.317020739 | -5.125256772 |
| 1422815_at   | -0.083395012 | 4.140800339 | -1.056729556 | 0.31702441  | 0.31702441  | -5.125264395 |
| 1453338_at   | 0.086877378  | 4.858200978 | 1.056723156  | 0.317027184 | 0.317027184 | -5.125270156 |
| 1441104_at   | 0.072254658  | 4.627723496 | 1.056446696  | 0.317147027 | 0.317147027 | -5.12551899  |
| 1427353_at   | 0.089229494  | 6.44486417  | 1.056404721  | 0.317165226 | 0.317165226 | -5.125556766 |
| 1450571_a_at | -0.078763373 | 4.759005818 | -1.056356745 | 0.317186028 | 0.317186028 | -5.125599941 |
| 1460534_at   | -0.101925414 | 3.191516168 | -1.056353754 | 0.317187325 | 0.317187325 | -5.125602633 |
| 1431660_at   | -0.096358856 | 4.796350357 | -1.056318353 | 0.317202675 | 0.317202675 | -5.125634449 |
| 1457866_at   | -0.113357163 | 4.069310591 | -1.056317827 | 0.317202903 | 0.317202903 | -5.125634963 |
| 1439552_at   | 0.113788026  | 4.197413362 | 1.056279398  | 0.317219567 | 0.317219567 | -5.125669545 |
| 1435237_at   | 0.090218335  | 9.132121771 | 1.056217286  | 0.317246501 | 0.317246501 | -5.125725437 |
| 1452634_at   | -0.07849203  | 4.191031384 | -1.056189481 | 0.31725856  | 0.31725856  | -5.125750457 |
| 1425894_at   | -0.159043665 | 6.250085385 | -1.056160725 | 0.31727103  | 0.31727103  | -5.125776332 |
| 1431215_at   | -0.102572103 | 3.468886391 | -1.056148785 | 0.317276209 | 0.317276209 | -5.125787075 |
| 1440972_at   | 0.232313322  | 7.666317765 | 1.056044015  | 0.317321649 | 0.317321649 | -5.125881343 |
| 1454996_at   | 0.082546741  | 8.277800501 | 1.056041208  | 0.317322866 | 0.317322866 | -5.125883868 |
| 1460189_at   | -0.075966715 | 7.971670597 | -1.056030327 | 0.317327586 | 0.317327586 | -5.125893658 |
| 1456644_at   | -0.08164397  | 4.312789803 | -1.056026446 | 0.317329269 | 0.317329269 | -5.12589715  |
| 1425312_s_at | -0.089112846 | 5.572933437 | -1.056023802 | 0.317330416 | 0.317330416 | -5.125899528 |
| 1415991_a_at | 0.071498114  | 11.1839739  | 1.056014318  | 0.31733453  | 0.31733453  | -5.125908061 |
| 1420263_at   | -0.098767092 | 3.764712964 | -1.055978302 | 0.317350152 | 0.317350152 | -5.125940465 |
| 1433260_at   | -0.081502944 | 3.639066889 | -1.05591442  | 0.317377863 | 0.317377863 | -5.125997937 |
| 1450950_at   | -0.068197118 | 9.723132641 | -1.05588932  | 0.317388751 | 0.317388751 | -5.126020517 |
| 1446929_at   | 0.151768313  | 6.209809652 | 1.055864344  | 0.317399587 | 0.317399587 | -5.126042986 |
| 1423524_at   | 0.144795077  | 6.23405069  | 1.055859     | 0.317401905 | 0.317401905 | -5.126047793 |
| 1441803_at   | -0.083084394 | 3.860271366 | -1.055810295 | 0.317423035 | 0.317423035 | -5.126091608 |
| 1444751_at   | 0.091921055  | 5.152460816 | 1.055729397  | 0.317458133 | 0.317458133 | -5.126164379 |
| 1429962_at   | 0.076547221  | 4.584519361 | 1.055710644  | 0.31746627  | 0.31746627  | -5.126181247 |
| 1456344_at   | 0.129844265  | 8.10042747  | 1.055674188  | 0.317482089 | 0.317482089 | -5.12621404  |
| 1446869_at   | -0.089400852 | 4.500444676 | -1.055620804 | 0.317505253 | 0.317505253 | -5.126262056 |
| 1445210_at   | 0.135252718  | 5.999445524 | 1.055561914  | 0.317530807 | 0.317530807 | -5.126315023 |
| 1439933_at   | 0.115659254  | 7.033892043 | 1.055550819  | 0.317535622 | 0.317535622 | -5.126325002 |
| 1435551_at   | 0.141421589  | 7.232715816 | 1.05548256   | 0.317565245 | 0.317565245 | -5.126386394 |
| 1426508_at   | 0.078442405  | 5.109683874 | 1.055446487  | 0.317580901 | 0.317580901 | -5.126418836 |
| 1432514_at   | -0.104567842 | 5.631759899 | -1.055440782 | 0.317583377 | 0.317583377 | -5.126423966 |
| 1452163_at   | 0.124260815  | 8.637846848 | 1.055246853  | 0.317667553 | 0.317667553 | -5.126598361 |
| 1449017_at   | 0.090920811  | 8.13510463  | 1.055211805  | 0.317682768 | 0.317682768 | -5.126629875 |
| 1449926_at   | -0.087596596 | 3.787317305 | -1.055110054 | 0.317726942 | 0.317726942 | -5.126721365 |
| 1433106_at   | -0.095743312 | 3.69588095  | -1.055055004 | 0.317750843 | 0.317750843 | -5.12677086  |
| 1453782_at   | 0.101132267  | 3.455110194 | 1.054781417  | 0.317869648 | 0.317869648 | -5.127016813 |
| 1450299_at   | -0.125781721 | 4.325616912 | -1.054780416 | 0.317870083 | 0.317870083 | -5.127017713 |
| 1419448_at   | 0.117590381  | 5.030864082 | 1.054755356  | 0.317880967 | 0.317880967 | -5.127040239 |
| 1443826_x_at | 0.095677366  | 7.251806811 | 1.054746038  | 0.317885014 | 0.317885014 | -5.127048615 |
| 1428424_at   | 0.091184898  | 4.735289904 | 1.054744887  | 0.317885514 | 0.317885514 | -5.12704965  |
| 1454404_at   | 0.162064738  | 7.214448037 | 1.054645693  | 0.317928599 | 0.317928599 | -5.12713881  |
| 1456876_at   | -0.080454234 | 4.66488472  | -1.054626157 | 0.317937085 | 0.317937085 | -5.127156369 |
| 1419612_at   | 0.193787009  | 6.389760334 | 1.054531727  | 0.317978105 | 0.317978105 | -5.127241241 |
| 1420201_at   | -0.071486318 | 3.473813482 | -1.054473605 | 0.318003356 | 0.318003356 | -5.127293476 |
| 1439175_at   | -0.08574253  | 6.988355641 | -1.054427109 | 0.318023557 | 0.318023557 | -5.127335262 |
| 1425987_a_at | -0.073371369 | 6.754070284 | -1.054314013 | 0.318072696 | 0.318072696 | -5.127436894 |
| 1442069_at   | 0.279975123  | 5.703766204 | 1.05423702   | 0.318106153 | 0.318106153 | -5.127506079 |
| 1459510_at   | 0.087870489  | 4.038098881 | 1.05422231   | 0.318112545 | 0.318112545 | -5.127519297 |

|              |              |             |              |             |             |              |
|--------------|--------------|-------------|--------------|-------------|-------------|--------------|
| 1425905_at   | 0.0796971    | 3.465404424 | 1.054190798  | 0.318126239 | 0.318126239 | -5.127547611 |
| 1422659_at   | 0.101028133  | 5.623870775 | 1.054111428  | 0.318160733 | 0.318160733 | -5.127618924 |
| 1431378_at   | -0.099039299 | 4.294271956 | -1.054102182 | 0.318164752 | 0.318164752 | -5.127627232 |
| 1446197_at   | 0.113880821  | 7.006244812 | 1.054084969  | 0.318172233 | 0.318172233 | -5.127642697 |
| 1442397_at   | 0.12855223   | 5.264315313 | 1.053812591  | 0.318290633 | 0.318290633 | -5.127887392 |
| 1456995_at   | -0.094420223 | 3.601080111 | -1.053752387 | 0.318316807 | 0.318316807 | -5.127941471 |
| 1460454_at   | -0.104474515 | 3.656095127 | -1.053724055 | 0.318329126 | 0.318329126 | -5.127966919 |
| 1438014_at   | 0.07532459   | 5.411064773 | 1.053634726  | 0.318367967 | 0.318367967 | -5.128047154 |
| 1419245_at   | 0.07820783   | 4.49031967  | 1.053585918  | 0.31838919  | 0.31838919  | -5.12809099  |
| 1440956_at   | -0.09124513  | 5.490290979 | -1.053569207 | 0.318396457 | 0.318396457 | -5.128105999 |
| 1446739_at   | 0.114522869  | 5.150808418 | 1.053521636  | 0.318417145 | 0.318417145 | -5.128148723 |
| 1420783_at   | -0.128187837 | 5.053297056 | -1.053492773 | 0.318429697 | 0.318429697 | -5.128174644 |
| 1435042_at   | 0.102977528  | 5.272676472 | 1.053477476  | 0.318436349 | 0.318436349 | -5.128188382 |
| 1447814_x_at | -0.077623982 | 3.846870364 | -1.053461891 | 0.318443127 | 0.318443127 | -5.128202378 |
| 1443139_at   | -0.110537033 | 4.034153469 | -1.053352714 | 0.318490612 | 0.318490612 | -5.12830042  |
| 1417530_a_at | 0.081581245  | 10.23956107 | 1.053290137  | 0.318517832 | 0.318517832 | -5.128356613 |
| 1426132_at   | 0.109253914  | 3.360760218 | 1.053227723  | 0.318544982 | 0.318544982 | -5.128412655 |
| 1455574_at   | -0.096356658 | 7.595913128 | -1.053127789 | 0.318588457 | 0.318588457 | -5.128502383 |
| 1444882_at   | -0.089024139 | 3.564007799 | -1.053085977 | 0.318606648 | 0.318606648 | -5.128539922 |
| 1454237_at   | -0.100450013 | 5.857949186 | -1.053073649 | 0.318612012 | 0.318612012 | -5.12855099  |
| 1430640_a_at | -0.125719735 | 8.225821544 | -1.053007373 | 0.318640848 | 0.318640848 | -5.128610491 |
| 1455678_at   | -0.087156452 | 7.601193858 | -1.05298854  | 0.318649043 | 0.318649043 | -5.128627399 |
| 1453291_at   | -0.119254933 | 5.284662109 | -1.052987828 | 0.318649353 | 0.318649353 | -5.128628038 |
| 1433934_at   | -0.095742269 | 8.918647123 | -1.052970889 | 0.318656723 | 0.318656723 | -5.128643245 |
| 1452729_at   | -0.076716639 | 5.334630922 | -1.052965969 | 0.318658864 | 0.318658864 | -5.128647662 |
| 1427110_at   | -0.122546655 | 7.191969519 | -1.052921046 | 0.318678412 | 0.318678412 | -5.12868799  |
| 1445698_at   | 0.080806686  | 5.740347641 | 1.052915256  | 0.318680932 | 0.318680932 | -5.128693187 |
| 1421235_s_at | 0.088918232  | 6.893594136 | 1.052877149  | 0.318697515 | 0.318697515 | -5.128727395 |
| 1439125_at   | -0.068483364 | 7.946875192 | -1.052789973 | 0.318735453 | 0.318735453 | -5.128805649 |
| 1451572_a_at | 0.070277573  | 9.145233222 | 1.052718852  | 0.318766407 | 0.318766407 | -5.128869486 |
| 1447633_x_at | -0.073382776 | 3.252112323 | -1.052711878 | 0.318769443 | 0.318769443 | -5.128875746 |
| 1448885_at   | 0.213829539  | 8.040424801 | 1.052662344  | 0.318791003 | 0.318791003 | -5.128920205 |
| 1452254_at   | -0.10587726  | 7.25020576  | -1.052634482 | 0.31880313  | 0.31880313  | -5.128945212 |
| 1440826_s_at | 0.098262449  | 6.723896733 | 1.052629631  | 0.318805242 | 0.318805242 | -5.128949566 |
| 1452777_a_at | -0.0778888   | 7.284202688 | -1.052588637 | 0.318823087 | 0.318823087 | -5.128986358 |
| 1432933_at   | -0.084185687 | 3.488144017 | -1.05249709  | 0.318862939 | 0.318862939 | -5.129068517 |
| 1418583_at   | -0.070745053 | 7.287254643 | -1.052461343 | 0.318878502 | 0.318878502 | -5.129100597 |
| 1447644_at   | -0.108586957 | 3.788183671 | -1.052412055 | 0.318899961 | 0.318899961 | -5.129144827 |
| 1437523_s_at | -0.155467342 | 3.407588911 | -1.052310297 | 0.318944267 | 0.318944267 | -5.129236138 |
| 1416303_at   | 0.077349841  | 9.864549361 | 1.052185636  | 0.318998552 | 0.318998552 | -5.129347993 |
| 1452426_x_at | -0.204544992 | 4.316342962 | -1.052095452 | 0.319037828 | 0.319037828 | -5.129428905 |
| 1458093_at   | 0.063722166  | 3.739851536 | 1.052086049  | 0.319041923 | 0.319041923 | -5.129437341 |
| 1426923_at   | 0.065915738  | 9.512629047 | 1.05204289   | 0.319060721 | 0.319060721 | -5.129476061 |
| 1445567_at   | 0.088268269  | 4.520079218 | 1.052042754  | 0.31906078  | 0.31906078  | -5.129476183 |
| 1454087_at   | -0.104504357 | 5.836584527 | -1.052025333 | 0.319068368 | 0.319068368 | -5.129491812 |
| 1445586_at   | 0.077985892  | 3.223576213 | 1.051997751  | 0.319080381 | 0.319080381 | -5.129516556 |
| 1457129_at   | 0.102996999  | 3.77533751  | 1.051967395  | 0.319093604 | 0.319093604 | -5.129543788 |
| 1444241_at   | 0.12491765   | 7.984001508 | 1.051948206  | 0.319101962 | 0.319101962 | -5.129561002 |
| 1437581_at   | 0.159328281  | 4.67163627  | 1.051942951  | 0.319104251 | 0.319104251 | -5.129565716 |
| 1419517_at   | -0.073992444 | 3.652834572 | -1.051885018 | 0.319129488 | 0.319129488 | -5.129617685 |
| 1456332_at   | -0.08206471  | 4.417891996 | -1.051820495 | 0.319157597 | 0.319157597 | -5.129675563 |
| 1434384_at   | 0.078957606  | 8.537178864 | 1.051589113  | 0.319258411 | 0.319258411 | -5.129883091 |
| 1440495_at   | 0.077135749  | 3.694555295 | 1.051554194  | 0.319273628 | 0.319273628 | -5.129914408 |



|              |              |             |              |             |             |              |
|--------------|--------------|-------------|--------------|-------------|-------------|--------------|
| 1430681_at   | -0.083910905 | 6.241308523 | -1.05143861  | 0.319323999 | 0.319323999 | -5.130018061 |
| 1425704_at   | -0.069422252 | 7.13370505  | -1.051407814 | 0.319337421 | 0.319337421 | -5.130045677 |
| 1439200_x_at | -0.16629331  | 9.878779711 | -1.051303761 | 0.319382774 | 0.319382774 | -5.13013898  |
| 1427446_s_at | -0.641124228 | 8.108044756 | -1.051303296 | 0.319382977 | 0.319382977 | -5.130139396 |
| 1443540_at   | 0.108646081  | 5.209755306 | 1.051282534  | 0.319392027 | 0.319392027 | -5.130158013 |
| 1459800_s_at | 0.097729838  | 8.995513716 | 1.051210683  | 0.319423348 | 0.319423348 | -5.130222435 |
| 1433484_at   | 0.097040168  | 3.759128683 | 1.051169061  | 0.319441492 | 0.319441492 | -5.130259752 |
| 1436103_at   | -0.081357482 | 6.795567934 | -1.05112569  | 0.3194604   | 0.3194604   | -5.130298637 |
| 1459268_at   | -0.112643913 | 4.92559343  | -1.051074299 | 0.319482806 | 0.319482806 | -5.13034471  |
| 1417665_a_at | 0.081309703  | 9.938836227 | 1.05106565   | 0.319486577 | 0.319486577 | -5.130352464 |
| 1439218_at   | -0.065371149 | 7.827645714 | -1.051060618 | 0.319488771 | 0.319488771 | -5.130356975 |
| 1439599_at   | -0.128461064 | 5.683952262 | -1.051034228 | 0.319500277 | 0.319500277 | -5.130380633 |
| 1431841_at   | -0.122884757 | 4.127156785 | -1.051020455 | 0.319506282 | 0.319506282 | -5.13039298  |
| 1418635_at   | 0.123640127  | 7.361432551 | 1.050910876  | 0.319554063 | 0.319554063 | -5.13049121  |
| 1452350_at   | 0.083220152  | 8.53902307  | 1.050850045  | 0.31958059  | 0.31958059  | -5.130545738 |
| 1415684_at   | -0.066173192 | 8.100909568 | -1.050760769 | 0.319619525 | 0.319619525 | -5.130625759 |
| 1447262_at   | 0.094573187  | 3.844411973 | 1.050736714  | 0.319630016 | 0.319630016 | -5.130647319 |
| 1458435_at   | -0.098597466 | 5.389500801 | -1.050660434 | 0.319663287 | 0.319663287 | -5.130715686 |
| 1434495_at   | 0.090766929  | 6.741905665 | 1.050627164  | 0.319677798 | 0.319677798 | -5.130745503 |
| 1449873_at   | -0.088979871 | 5.761206343 | -1.050573963 | 0.319701005 | 0.319701005 | -5.130793182 |
| 1423177_a_at | 0.083559504  | 9.710010386 | 1.050547124  | 0.319712713 | 0.319712713 | -5.130817234 |
| 1417498_at   | -0.089931177 | 6.271681457 | -1.050503928 | 0.319731557 | 0.319731557 | -5.130855944 |
| 1444528_at   | 0.098092998  | 6.000539176 | 1.05044456   | 0.319757457 | 0.319757457 | -5.130909145 |
| 1450111_a_at | -0.066139378 | 7.171641171 | -1.05041776  | 0.31976915  | 0.31976915  | -5.13093316  |
| 1455056_at   | -0.105121282 | 8.068626783 | -1.050367613 | 0.319791029 | 0.319791029 | -5.130978094 |
| 1447220_at   | 0.076843347  | 4.38223158  | 1.050307308  | 0.319817341 | 0.319817341 | -5.131032129 |
| 1434973_at   | -0.090684921 | 4.153598987 | -1.05027871  | 0.31982982  | 0.31982982  | -5.131057753 |
| 1453852_at   | -0.074300348 | 7.217365344 | -1.050277428 | 0.319830379 | 0.319830379 | -5.131058901 |
| 1449870_a_at | 0.098440596  | 7.675135426 | 1.050273713  | 0.319832    | 0.319832    | -5.13106223  |
| 1428461_at   | 0.06668689   | 8.547013871 | 1.050078105  | 0.319917364 | 0.319917364 | -5.131237479 |
| 1425222_x_at | -0.105962325 | 3.528881851 | -1.050033601 | 0.319936788 | 0.319936788 | -5.131277348 |
| 1456857_at   | -0.105483161 | 6.615151403 | -1.049970718 | 0.319964235 | 0.319964235 | -5.131333679 |
| 1419118_at   | -0.132262753 | 7.35663594  | -1.049924407 | 0.31998445  | 0.31998445  | -5.131375163 |
| 1431891_at   | -0.075418122 | 4.934833362 | -1.049883198 | 0.320002438 | 0.320002438 | -5.131412076 |
| 1427086_at   | -0.101335917 | 8.942997988 | -1.049861604 | 0.320011865 | 0.320011865 | -5.131431418 |
| 1453799_at   | -0.07674447  | 6.323514288 | -1.049829152 | 0.320026032 | 0.320026032 | -5.131460485 |
| 1422023_at   | -0.121298687 | 5.005891194 | -1.049699354 | 0.3200827   | 0.3200827   | -5.131576739 |
| 1455647_at   | -0.076199513 | 4.367199277 | -1.049671494 | 0.320094864 | 0.320094864 | -5.13160169  |
| 1455029_at   | 0.13747812   | 7.461591535 | 1.049628173  | 0.32011378  | 0.32011378  | -5.131640488 |
| 1416255_at   | 0.102741231  | 6.264622279 | 1.049565706  | 0.320141057 | 0.320141057 | -5.13169643  |
| 1451728_at   | 0.07860808   | 9.096935886 | 1.049422683  | 0.320203516 | 0.320203516 | -5.131824503 |
| 1447870_x_at | -0.443415593 | 6.662991808 | -1.049389129 | 0.320218171 | 0.320218171 | -5.131854549 |
| 1415860_at   | 0.067004497  | 11.31827564 | 1.04930312   | 0.320255738 | 0.320255738 | -5.13193156  |
| 1425357_a_at | -0.10632993  | 6.851226425 | -1.049300027 | 0.320257089 | 0.320257089 | -5.131934329 |
| 1435502_a_at | 0.089072144  | 3.566977079 | 1.049281386  | 0.320265231 | 0.320265231 | -5.131951019 |
| 1424423_at   | -0.081905949 | 4.980702352 | -1.049232332 | 0.320286659 | 0.320286659 | -5.131994939 |
| 1448926_at   | -0.103526646 | 3.745148659 | -1.049102099 | 0.320343552 | 0.320343552 | -5.132111531 |
| 1416256_a_at | 0.074348888  | 13.11990638 | 1.048957935  | 0.32040654  | 0.32040654  | -5.132240583 |
| 1427836_at   | 0.117855947  | 4.20152551  | 1.048950544  | 0.320409769 | 0.320409769 | -5.132247199 |
| 1458013_at   | -0.099030995 | 4.043229384 | -1.048945975 | 0.320411766 | 0.320411766 | -5.132251289 |
| 1433063_at   | -0.093872513 | 4.880063371 | -1.048917801 | 0.320424077 | 0.320424077 | -5.132276508 |
| 1425979_a_at | -0.085010711 | 8.787152708 | -1.048909332 | 0.320427778 | 0.320427778 | -5.132284089 |
| 1459602_at   | -0.084998885 | 4.119991931 | -1.048898753 | 0.3204324   | 0.3204324   | -5.132293558 |

|              |              |             |              |             |             |              |
|--------------|--------------|-------------|--------------|-------------|-------------|--------------|
| 1424560_at   | -0.13925978  | 4.891179406 | -1.048873965 | 0.320443233 | 0.320443233 | -5.132315745 |
| 1424742_at   | 0.077728583  | 5.754233025 | 1.048786259  | 0.320481561 | 0.320481561 | -5.132394246 |
| 1424870_at   | 0.099703539  | 5.632101422 | 1.04852531   | 0.320595619 | 0.320595619 | -5.132627778 |
| 1418050_at   | -0.089195038 | 6.425681959 | -1.048484595 | 0.320613418 | 0.320613418 | -5.132664211 |
| 1459551_at   | -0.120822277 | 4.530502804 | -1.048465732 | 0.320621665 | 0.320621665 | -5.13268109  |
| 1433048_at   | -0.07972196  | 4.473330721 | -1.048235836 | 0.320722181 | 0.320722181 | -5.132886785 |
| 1453043_at   | 0.116393635  | 4.045354938 | 1.048234908  | 0.320722587 | 0.320722587 | -5.132887616 |
| 1416120_at   | -0.078847411 | 9.374579877 | -1.048099194 | 0.320781937 | 0.320781937 | -5.133009028 |
| 1418412_at   | -0.081604269 | 7.934294798 | -1.048018501 | 0.320817228 | 0.320817228 | -5.133081211 |
| 1449446_at   | 0.18634277   | 7.681615054 | 1.048014315  | 0.320819059 | 0.320819059 | -5.133084956 |
| 1444249_at   | -0.089962103 | 3.298946003 | -1.048000569 | 0.320825072 | 0.320825072 | -5.133097252 |
| 1419315_at   | -0.091349617 | 5.669510549 | -1.047984223 | 0.320832221 | 0.320832221 | -5.133111873 |
| 1441301_at   | -0.089675578 | 6.378025012 | -1.0479483   | 0.320847934 | 0.320847934 | -5.133144006 |
| 1416347_at   | 0.080156867  | 9.125760628 | 1.047929729  | 0.320856057 | 0.320856057 | -5.133160617 |
| 1454874_at   | 0.082813268  | 9.652871667 | 1.047904756  | 0.320866981 | 0.320866981 | -5.133182954 |
| 1460725_at   | 0.120605708  | 6.772494386 | 1.047821276  | 0.3209035   | 0.3209035   | -5.13325762  |
| 1420645_at   | -0.126772943 | 6.931762791 | -1.0478182   | 0.320904845 | 0.320904845 | -5.133260371 |
| 1440306_at   | -0.078737435 | 4.030234264 | -1.047755782 | 0.320932152 | 0.320932152 | -5.133316196 |
| 1426327_s_at | 0.122880842  | 7.037566689 | 1.047717929  | 0.320948713 | 0.320948713 | -5.133350049 |
| 1444924_at   | 0.099650211  | 5.886289886 | 1.047679679  | 0.320965448 | 0.320965448 | -5.133384257 |
| 1425244_a_at | -0.115568255 | 4.366105493 | -1.047629148 | 0.320987558 | 0.320987558 | -5.133429445 |
| 1424636_at   | -0.08594039  | 8.51464711  | -1.047592908 | 0.321003415 | 0.321003415 | -5.133461853 |
| 1446106_at   | -0.078606752 | 3.569129765 | -1.047505737 | 0.32104156  | 0.32104156  | -5.133539802 |
| 1434871_at   | -0.088325541 | 4.179100556 | -1.047489926 | 0.32104848  | 0.32104848  | -5.13355394  |
| 1422552_at   | 0.074409685  | 7.322279307 | 1.047460584  | 0.32106132  | 0.32106132  | -5.133580177 |
| 1425854_x_at | -0.071323033 | 5.4654681   | -1.047458122 | 0.321062398 | 0.321062398 | -5.133582378 |
| 1435025_at   | 0.065920381  | 7.576844339 | 1.047397231  | 0.321089046 | 0.321089046 | -5.133636823 |
| 1423871_at   | 0.084241425  | 7.571397676 | 1.04733175   | 0.321117706 | 0.321117706 | -5.133695369 |
| 1452588_at   | -0.074676692 | 6.581667012 | -1.04729541  | 0.321133612 | 0.321133612 | -5.133727859 |
| 1420460_a_at | -0.079261991 | 7.648865    | -1.047283348 | 0.321138892 | 0.321138892 | -5.133738644 |
| 1416057_at   | -0.073857136 | 11.54668639 | -1.047210157 | 0.321170929 | 0.321170929 | -5.133804077 |
| 1420652_at   | 0.079330826  | 6.834886982 | 1.047199192  | 0.321175729 | 0.321175729 | -5.13381388  |
| 1458808_at   | -0.076642664 | 3.193924928 | -1.047161535 | 0.321192214 | 0.321192214 | -5.133847544 |
| 1443196_at   | 0.096192409  | 5.844357758 | 1.047080622  | 0.321227637 | 0.321227637 | -5.133919875 |
| 1426092_a_at | 0.081790271  | 3.754590349 | 1.04704623   | 0.321242694 | 0.321242694 | -5.133950618 |
| 1435630_s_at | 0.080958389  | 11.27903909 | 1.047008815  | 0.321259075 | 0.321259075 | -5.133984062 |
| 1446457_at   | -0.087739773 | 4.520576853 | -1.047000269 | 0.321262817 | 0.321262817 | -5.133991701 |
| 1435049_s_at | -0.095320712 | 6.512742427 | -1.046945591 | 0.321286758 | 0.321286758 | -5.134040575 |
| 1417570_at   | -0.078904998 | 8.598606023 | -1.046923353 | 0.321296496 | 0.321296496 | -5.134060451 |
| 1431927_at   | -0.104222879 | 4.683665489 | -1.04688251  | 0.32131438  | 0.32131438  | -5.134096956 |
| 1440174_at   | -0.07142223  | 4.054633291 | -1.046856025 | 0.321325978 | 0.321325978 | -5.134120628 |
| 1434153_at   | -0.102862913 | 7.584657139 | -1.04675864  | 0.321368626 | 0.321368626 | -5.134207664 |
| 1424518_at   | 0.070842248  | 4.016690752 | 1.046734392  | 0.321379245 | 0.321379245 | -5.134229334 |
| 1450070_s_at | 0.114952036  | 8.612255498 | 1.046710124  | 0.321389874 | 0.321389874 | -5.134251022 |
| 1452772_at   | 0.070928382  | 6.470155394 | 1.046697853  | 0.321395248 | 0.321395248 | -5.134261987 |
| 1453897_at   | -0.081686095 | 3.351972381 | -1.046526034 | 0.321470508 | 0.321470508 | -5.134415525 |
| 1426933_at   | 0.078971695  | 8.177752643 | 1.046502596  | 0.321480775 | 0.321480775 | -5.134436469 |
| 1440343_at   | -0.113409018 | 7.243632046 | -1.046493291 | 0.321484852 | 0.321484852 | -5.134444783 |
| 1445517_at   | 0.102833083  | 6.020349882 | 1.046439313  | 0.321508499 | 0.321508499 | -5.134493013 |
| 1454438_at   | 0.120087443  | 4.311619157 | 1.046340616  | 0.321551739 | 0.321551739 | -5.134581194 |
| 1444869_at   | -0.124290914 | 5.020608231 | -1.046335726 | 0.321553882 | 0.321553882 | -5.134585563 |
| 1418240_at   | 0.128670613  | 4.187792927 | 1.046240923  | 0.321595422 | 0.321595422 | -5.13467026  |
| 1452153_at   | 0.066014048  | 9.546338352 | 1.046234694  | 0.321598151 | 0.321598151 | -5.134675824 |

|              |              |             |              |             |             |              |
|--------------|--------------|-------------|--------------|-------------|-------------|--------------|
| 1446025_at   | 0.087070871  | 5.142275704 | 1.046179341  | 0.321622407 | 0.321622407 | -5.134725273 |
| 1436356_at   | 0.183561614  | 8.443810213 | 1.04607873   | 0.321666498 | 0.321666498 | -5.134815148 |
| 1431323_at   | 0.082367542  | 3.929139005 | 1.046038885  | 0.321683961 | 0.321683961 | -5.134850739 |
| 1460516_at   | -0.084685479 | 3.633076957 | -1.046034735 | 0.32168578  | 0.32168578  | -5.134854446 |
| 1445917_at   | -0.113065428 | 5.211680036 | -1.04601067  | 0.321696327 | 0.321696327 | -5.134875941 |
| 1425649_at   | -0.104793744 | 6.741279483 | -1.045772571 | 0.321800697 | 0.321800697 | -5.135088596 |
| 1444697_at   | -0.078944845 | 4.899531965 | -1.045717871 | 0.321824678 | 0.321824678 | -5.135137445 |
| 1447793_x_at | -0.1050663   | 3.793891621 | -1.045676428 | 0.321842848 | 0.321842848 | -5.135174453 |
| 1460481_at   | 0.106400653  | 4.493376947 | 1.045658447  | 0.321850731 | 0.321850731 | -5.13519051  |
| 1443993_at   | -0.090035074 | 4.831412854 | -1.045655775 | 0.321851903 | 0.321851903 | -5.135192897 |
| 1428572_at   | 0.10258578   | 12.43446765 | 1.045625985  | 0.321864965 | 0.321864965 | -5.135219498 |
| 1431503_at   | -0.100392162 | 3.357590533 | -1.045563854 | 0.321892208 | 0.321892208 | -5.135274977 |
| 1420233_at   | -0.147191482 | 6.013604683 | -1.045494739 | 0.321922516 | 0.321922516 | -5.13533669  |
| 1424044_at   | -0.103811521 | 7.20708778  | -1.045479561 | 0.321929171 | 0.321929171 | -5.135350242 |
| 1428632_at   | -0.068441618 | 6.017752452 | -1.045432859 | 0.321949652 | 0.321949652 | -5.13539194  |
| 1450292_a_at | -0.072071674 | 3.039301398 | -1.045390329 | 0.321968304 | 0.321968304 | -5.135429912 |
| 1456743_x_at | -0.074112501 | 12.75305101 | -1.045354256 | 0.321984126 | 0.321984126 | -5.135462118 |
| 1435956_at   | 0.098563061  | 4.158844033 | 1.045331854  | 0.321993951 | 0.321993951 | -5.135482118 |
| 1432058_at   | 0.067536067  | 3.837000793 | 1.045244305  | 0.322032351 | 0.322032351 | -5.135560276 |
| 1440544_at   | 0.090437191  | 5.436740141 | 1.045184     | 0.322058805 | 0.322058805 | -5.13561411  |
| 1443703_at   | -0.075562044 | 3.179452408 | -1.045096712 | 0.322097096 | 0.322097096 | -5.135692027 |
| 1431979_at   | -0.076459878 | 3.612055689 | -1.045008207 | 0.322135926 | 0.322135926 | -5.135771026 |
| 1431128_at   | -0.152011976 | 5.371292266 | -1.044920863 | 0.32217425  | 0.32217425  | -5.135848983 |
| 1445941_at   | 0.07441413   | 4.875058246 | 1.044907853  | 0.322179958 | 0.322179958 | -5.135860594 |
| 1459787_at   | -0.129323694 | 4.580702654 | -1.044888286 | 0.322188544 | 0.322188544 | -5.135878057 |
| 1417024_at   | 0.088937999  | 9.071251142 | 1.044842909  | 0.322208456 | 0.322208456 | -5.135918555 |
| 1419160_at   | -0.086499216 | 3.69722299  | -1.044838396 | 0.322210437 | 0.322210437 | -5.135922583 |
| 1452903_at   | 0.07204539   | 8.290445465 | 1.044822078  | 0.322217598 | 0.322217598 | -5.135937146 |
| 1442522_at   | -0.083663177 | 3.349144897 | -1.044693584 | 0.322273988 | 0.322273988 | -5.136051813 |
| 1443165_at   | 0.113482167  | 5.231821958 | 1.044656613  | 0.322290215 | 0.322290215 | -5.136084804 |
| 1424494_s_at | -0.074507437 | 7.553312028 | -1.0446484   | 0.32229382  | 0.32229382  | -5.136092132 |
| 1447701_x_at | -0.094961558 | 6.252211285 | -1.044607145 | 0.322311927 | 0.322311927 | -5.136128944 |
| 1416357_a_at | 0.092817133  | 7.443242392 | 1.044544028  | 0.322339632 | 0.322339632 | -5.136185262 |
| 1444498_at   | 0.15150492   | 4.740493247 | 1.044391819  | 0.32240645  | 0.32240645  | -5.136321064 |
| 1445354_at   | 0.099908008  | 3.615955288 | 1.044312418  | 0.322441311 | 0.322441311 | -5.1363919   |
| 1441074_at   | -0.084384162 | 3.811510406 | -1.044235529 | 0.322475072 | 0.322475072 | -5.136460492 |
| 1427221_at   | -0.101230233 | 3.211994886 | -1.044144123 | 0.32251521  | 0.32251521  | -5.136542028 |
| 1439850_at   | 0.093059776  | 4.570844966 | 1.044134617  | 0.322519384 | 0.322519384 | -5.136550507 |
| 1420231_at   | -0.088583912 | 3.644044009 | -1.044093549 | 0.322537419 | 0.322537419 | -5.136587138 |
| 1433625_at   | 0.077790222  | 8.847615729 | 1.044062613  | 0.322551005 | 0.322551005 | -5.136614732 |
| 1432364_at   | 0.07024021   | 5.504575118 | 1.044000881  | 0.322578118 | 0.322578118 | -5.136669792 |
| 1429100_at   | -0.107179226 | 6.684594106 | -1.04398839  | 0.322583604 | 0.322583604 | -5.136680933 |
| 1418315_at   | -0.080122749 | 4.860578927 | -1.043791319 | 0.322670168 | 0.322670168 | -5.136856686 |
| 1430716_at   | -0.071681408 | 4.226673232 | -1.043788946 | 0.322671211 | 0.322671211 | -5.136858803 |
| 1444068_at   | 0.153861644  | 4.465209845 | 1.043736954  | 0.322694051 | 0.322694051 | -5.136905166 |
| 1457779_at   | 0.078072139  | 3.933779951 | 1.043716066  | 0.322703228 | 0.322703228 | -5.136923792 |
| 1433067_at   | 0.096400072  | 3.775685301 | 1.043689102  | 0.322715074 | 0.322715074 | -5.136947837 |
| 1424201_a_at | 0.125304758  | 6.923376714 | 1.043686914  | 0.322716036 | 0.322716036 | -5.136949788 |
| 1425264_s_at | 0.120840141  | 6.767874353 | 1.043657055  | 0.322729154 | 0.322729154 | -5.136976413 |
| 1445472_at   | -0.084960174 | 5.473358334 | -1.043620061 | 0.322745408 | 0.322745408 | -5.137009399 |
| 1432215_s_at | 0.088228279  | 4.069248523 | 1.043617609  | 0.322746486 | 0.322746486 | -5.137011585 |
| 1433378_at   | 0.107741243  | 3.521602172 | 1.043591295  | 0.322758047 | 0.322758047 | -5.137035048 |
| 1439698_at   | 0.138362511  | 4.836675062 | 1.043409423  | 0.322837968 | 0.322837968 | -5.1371972   |

|              |              |             |              |             |             |              |
|--------------|--------------|-------------|--------------|-------------|-------------|--------------|
| 1430112_at   | -0.13113394  | 4.625195383 | -1.0433619   | 0.322858854 | 0.322858854 | -5.137239567 |
| 1416172_at   | 0.070580584  | 9.032236354 | 1.043353458  | 0.322862564 | 0.322862564 | -5.137247093 |
| 1448662_at   | 0.192880933  | 6.44614103  | 1.043346686  | 0.32286554  | 0.32286554  | -5.13725313  |
| 1424606_at   | -0.090016853 | 4.469071051 | -1.043304937 | 0.322883889 | 0.322883889 | -5.137290348 |
| 1424969_s_at | 0.096361089  | 3.173118573 | 1.043249986  | 0.322908042 | 0.322908042 | -5.137339333 |
| 1455354_at   | 0.071163638  | 6.973131156 | 1.043240764  | 0.322912095 | 0.322912095 | -5.137347553 |
| 1448983_at   | 0.089043087  | 4.625907629 | 1.043237289  | 0.322913623 | 0.322913623 | -5.137350651 |
| 1428647_at   | -0.095519658 | 10.58253687 | -1.043176204 | 0.322940474 | 0.322940474 | -5.137405101 |
| 1444967_at   | 0.0991179    | 3.809976827 | 1.043140325  | 0.322956246 | 0.322956246 | -5.137437082 |
| 1434412_x_at | -0.06869007  | 9.463861325 | -1.043050086 | 0.322995917 | 0.322995917 | -5.137517513 |
| 1437112_at   | 0.097394583  | 6.198129511 | 1.042981     | 0.32302629  | 0.32302629  | -5.137579086 |
| 1439490_at   | 0.07195534   | 7.742550323 | 1.04291826   | 0.323053876 | 0.323053876 | -5.137635001 |
| 1424014_at   | 0.081649385  | 8.010527688 | 1.04286969   | 0.323075232 | 0.323075232 | -5.137678285 |
| 1439730_at   | -0.096099352 | 4.098213767 | -1.042833753 | 0.323091035 | 0.323091035 | -5.137710311 |
| 1432076_at   | -0.078771289 | 4.042082469 | -1.042780448 | 0.323114476 | 0.323114476 | -5.137757812 |
| 1453356_at   | 0.072877633  | 7.316946543 | 1.042737733  | 0.32313326  | 0.32313326  | -5.137795875 |
| 1441007_at   | -0.072873081 | 5.538760977 | -1.042725113 | 0.323138811 | 0.323138811 | -5.137807121 |
| 1426615_s_at | 0.119145687  | 9.388790335 | 1.042719529  | 0.323141266 | 0.323141266 | -5.137812097 |
| 1441146_at   | 0.080677323  | 4.461280059 | 1.042597143  | 0.323195093 | 0.323195093 | -5.137921145 |
| 1445171_at   | -0.115266257 | 3.801312066 | -1.042589523 | 0.323198445 | 0.323198445 | -5.137927935 |
| 1458447_at   | 0.201925282  | 6.468364298 | 1.042544366  | 0.323218308 | 0.323218308 | -5.137968168 |
| 1450408_at   | 0.087070515  | 7.182568944 | 1.042491542  | 0.323241544 | 0.323241544 | -5.13801523  |
| 1444807_at   | -0.087446672 | 3.903936575 | -1.042427848 | 0.323269563 | 0.323269563 | -5.138071976 |
| 1458833_at   | -0.078811143 | 4.013506484 | -1.042421065 | 0.323272547 | 0.323272547 | -5.138078018 |
| 1446467_at   | 0.131425183  | 4.259358377 | 1.042404669  | 0.32327976  | 0.32327976  | -5.138092625 |
| 1426798_a_at | -0.070441882 | 9.415397957 | -1.042348393 | 0.323304518 | 0.323304518 | -5.138142758 |
| 1451509_at   | 0.077685713  | 9.14328065  | 1.042332256  | 0.323311618 | 0.323311618 | -5.138157133 |
| 1434044_at   | -0.081294399 | 7.98825364  | -1.042317378 | 0.323318164 | 0.323318164 | -5.138170386 |
| 1427260_a_at | 0.071608659  | 12.13289326 | 1.042177329  | 0.323379785 | 0.323379785 | -5.138295136 |
| 1441426_at   | 0.074654867  | 5.423902082 | 1.042145282  | 0.323393888 | 0.323393888 | -5.138323681 |
| 1425114_at   | 0.067744398  | 8.442609192 | 1.042033917  | 0.323442896 | 0.323442896 | -5.138422868 |
| 1432089_at   | 0.087336722  | 4.850336845 | 1.042012826  | 0.323452179 | 0.323452179 | -5.138441652 |
| 1457146_at   | 0.129660256  | 5.852901339 | 1.0418149    | 0.323539297 | 0.323539297 | -5.138617913 |
| 1422813_at   | -0.103660817 | 4.89856607  | -1.041771637 | 0.323558341 | 0.323558341 | -5.138656437 |
| 1429270_a_at | 0.082898908  | 9.335411439 | 1.041758125  | 0.323564289 | 0.323564289 | -5.138668468 |
| 1442088_at   | -0.083546752 | 4.304081541 | -1.041679051 | 0.323599101 | 0.323599101 | -5.138738877 |
| 1452012_a_at | 0.083536168  | 9.258738852 | 1.041642657  | 0.323615124 | 0.323615124 | -5.138771281 |
| 1431061_s_at | 0.062134277  | 7.010735442 | 1.041599224  | 0.323634247 | 0.323634247 | -5.138809951 |
| 1458095_at   | 0.117300397  | 5.81087772  | 1.041535498  | 0.323662307 | 0.323662307 | -5.138866688 |
| 1429257_at   | 0.131176181  | 8.084676395 | 1.041517745  | 0.323670124 | 0.323670124 | -5.138882492 |
| 1430032_at   | 0.070365583  | 6.853804372 | 1.041460807  | 0.323695196 | 0.323695196 | -5.138933182 |
| 1448272_at   | -0.077312159 | 7.648408007 | -1.041430806 | 0.323708408 | 0.323708408 | -5.138959891 |
| 1430021_a_at | 0.070826551  | 9.894617363 | 1.041404495  | 0.323719994 | 0.323719994 | -5.138983313 |
| 1417417_a_at | -0.077175775 | 13.2777298  | -1.041380208 | 0.32373069  | 0.32373069  | -5.139004933 |
| 1428223_at   | 0.128439385  | 5.676855698 | 1.041348236  | 0.323744771 | 0.323744771 | -5.139033394 |
| 1440570_at   | -0.087979455 | 3.682609514 | -1.041231931 | 0.323795996 | 0.323795996 | -5.139136921 |
| 1455361_at   | -0.164452145 | 4.721021744 | -1.04117562  | 0.3238208   | 0.3238208   | -5.139187042 |
| 1451391_at   | -0.094267927 | 8.155410513 | -1.041173908 | 0.323821553 | 0.323821553 | -5.139188565 |
| 1432390_at   | -0.101252046 | 4.441665567 | -1.041080481 | 0.323862709 | 0.323862709 | -5.139271718 |
| 1422149_at   | -0.124169484 | 5.286555202 | -1.041010325 | 0.323893616 | 0.323893616 | -5.139334155 |
| 1458837_at   | -0.116524671 | 3.774555027 | -1.040941646 | 0.323923875 | 0.323923875 | -5.139395274 |
| 1460616_at   | -0.092423027 | 3.93774019  | -1.040860957 | 0.323959428 | 0.323959428 | -5.139467077 |
| 1437542_at   | 0.094773754  | 8.429826008 | 1.040724145  | 0.324019716 | 0.324019716 | -5.139588814 |

|              |              |             |              |             |             |              |
|--------------|--------------|-------------|--------------|-------------|-------------|--------------|
| 1439815_at   | -0.086076023 | 8.124091637 | -1.040723292 | 0.324020092 | 0.324020092 | -5.139589572 |
| 1434107_at   | 0.115620809  | 7.811749698 | 1.040678036  | 0.324040036 | 0.324040036 | -5.139629839 |
| 1420618_at   | -0.084179895 | 8.145270514 | -1.040620489 | 0.324065399 | 0.324065399 | -5.139681039 |
| 1431854_a_at | -0.115829653 | 5.66102417  | -1.040575717 | 0.324085132 | 0.324085132 | -5.139720872 |
| 1428141_at   | -0.095467181 | 10.27485783 | -1.040559576 | 0.324092247 | 0.324092247 | -5.139735232 |
| 1437355_at   | -0.110515123 | 9.840763074 | -1.040419735 | 0.324153889 | 0.324153889 | -5.139859635 |
| 1416469_at   | 0.077245393  | 9.088532999 | 1.040359139  | 0.324180602 | 0.324180602 | -5.139913538 |
| 1417625_s_at | 0.121163505  | 9.599141265 | 1.040329219  | 0.324193793 | 0.324193793 | -5.139940153 |
| 1416934_at   | 0.085988251  | 4.587514308 | 1.040251442  | 0.324228084 | 0.324228084 | -5.140009333 |
| 1429919_at   | -0.071701396 | 5.93659846  | -1.040208594 | 0.324246977 | 0.324246977 | -5.140047444 |
| 1460470_at   | -0.126042485 | 4.273262052 | -1.040171091 | 0.324263513 | 0.324263513 | -5.140080799 |
| 1433071_at   | 0.087447302  | 3.169100188 | 1.040155069  | 0.324270578 | 0.324270578 | -5.14009505  |
| 1432534_at   | 0.097390334  | 5.494007869 | 1.040049112  | 0.324317303 | 0.324317303 | -5.140189283 |
| 1420117_at   | -0.099057326 | 5.6352677   | -1.040006728 | 0.324335995 | 0.324335995 | -5.140226975 |
| 1437801_at   | 0.098999759  | 9.978819473 | 1.039965408  | 0.324354218 | 0.324354218 | -5.14026372  |
| 1425296_a_at | -0.072280315 | 9.583228935 | -1.039898676 | 0.324383651 | 0.324383651 | -5.140323061 |
| 1443625_at   | -0.099832876 | 6.530714621 | -1.039853871 | 0.324403413 | 0.324403413 | -5.140362902 |
| 1425610_s_at | -0.14769499  | 8.322822376 | -1.039822798 | 0.32441712  | 0.32441712  | -5.140390532 |
| 1456760_at   | -0.127895756 | 4.547746249 | -1.039798219 | 0.324427962 | 0.324427962 | -5.140412386 |
| 1458151_at   | 0.067950153  | 3.817429391 | 1.039774098  | 0.324438602 | 0.324438602 | -5.140433834 |
| 1448306_at   | 0.10687025   | 8.540740634 | 1.039750863  | 0.324448851 | 0.324448851 | -5.140454492 |
| 1457212_at   | 0.092379821  | 3.670401676 | 1.039745527  | 0.324451205 | 0.324451205 | -5.140459237 |
| 1432907_at   | -0.075888547 | 3.216368345 | -1.039705706 | 0.324468772 | 0.324468772 | -5.140494642 |
| 1455545_at   | -0.078420865 | 8.862739    | -1.039702403 | 0.32447023  | 0.32447023  | -5.140497579 |
| 1443274_at   | -0.082827635 | 3.401452754 | -1.039691938 | 0.324474846 | 0.324474846 | -5.140506883 |
| 1452102_at   | -0.071082828 | 11.0354723  | -1.039626953 | 0.324503516 | 0.324503516 | -5.140564659 |
| 1433027_at   | 0.069230264  | 6.454854935 | 1.0396007    | 0.324515099 | 0.324515099 | -5.140587998 |
| 1428992_at   | 0.089555314  | 4.740436686 | 1.039588283  | 0.324520578 | 0.324520578 | -5.140599037 |
| 1457287_at   | -0.083008674 | 5.72328644  | -1.039577393 | 0.324525383 | 0.324525383 | -5.140608719 |
| 1432381_a_at | -0.076026849 | 3.515348228 | -1.03954921  | 0.324537818 | 0.324537818 | -5.140633774 |
| 1422425_at   | -0.075051269 | 5.905373167 | -1.039528162 | 0.324547105 | 0.324547105 | -5.140652485 |
| 1422660_at   | 0.066323162  | 12.1352987  | 1.039414237  | 0.324597376 | 0.324597376 | -5.140753758 |
| 1454894_at   | 0.063893833  | 9.62303117  | 1.039402933  | 0.324602364 | 0.324602364 | -5.140763806 |
| 1419376_at   | 0.139568221  | 9.565226444 | 1.039379916  | 0.324612522 | 0.324612522 | -5.140784266 |
| 1443674_at   | -0.111394506 | 4.896961359 | -1.039322754 | 0.324637748 | 0.324637748 | -5.140835075 |
| 1456242_at   | -0.335618851 | 6.5214468   | -1.039304231 | 0.324645923 | 0.324645923 | -5.140851538 |
| 1421361_at   | -0.10217461  | 4.533034122 | -1.039133675 | 0.324721203 | 0.324721203 | -5.141003125 |
| 1429687_at   | 0.106164551  | 3.409448458 | 1.039132119  | 0.32472189  | 0.32472189  | -5.141004508 |
| 1453781_at   | -0.082735562 | 4.530692081 | -1.039122118 | 0.324726305 | 0.324726305 | -5.141013396 |
| 1426909_at   | -0.089838429 | 7.76113456  | -1.039105722 | 0.324733542 | 0.324733542 | -5.141027967 |
| 1429097_at   | 0.105824437  | 7.322209312 | 1.039099754  | 0.324736177 | 0.324736177 | -5.141033271 |
| 1446147_at   | -0.132209987 | 10.44484729 | -1.039091845 | 0.324739668 | 0.324739668 | -5.1410403   |
| 1453998_at   | -0.088380217 | 3.560313316 | -1.039073957 | 0.324747565 | 0.324747565 | -5.141056196 |
| 1434813_x_at | 0.069989391  | 8.640597763 | 1.039026237  | 0.324768631 | 0.324768631 | -5.141098604 |
| 1439942_at   | -0.082065729 | 6.613981484 | -1.039022444 | 0.324770305 | 0.324770305 | -5.141101974 |
| 1455407_at   | -0.092784811 | 7.713945979 | -1.03902012  | 0.324771331 | 0.324771331 | -5.141104039 |
| 1447339_at   | 0.076599592  | 6.850624546 | 1.038981386  | 0.324788431 | 0.324788431 | -5.141138459 |
| 1429741_at   | 0.070870466  | 3.667099584 | 1.03892067   | 0.324815238 | 0.324815238 | -5.141192412 |
| 1446421_at   | -0.100713618 | 5.840562151 | -1.038896212 | 0.324826037 | 0.324826037 | -5.141214145 |
| 1432706_at   | -0.093624505 | 3.796528177 | -1.038865897 | 0.324839421 | 0.324839421 | -5.141241081 |
| 1452374_at   | 0.097090498  | 8.558638087 | 1.038817627  | 0.324860735 | 0.324860735 | -5.141283971 |
| 1427317_at   | 0.077822133  | 7.098973788 | 1.038784726  | 0.324875263 | 0.324875263 | -5.141313203 |
| 1422135_at   | 0.193762314  | 7.190050368 | 1.038751253  | 0.324890045 | 0.324890045 | -5.141342944 |

|              |              |             |              |             |             |              |
|--------------|--------------|-------------|--------------|-------------|-------------|--------------|
| 1435137_s_at | 0.17148725   | 8.111225119 | 1.038708203  | 0.324909055 | 0.324909055 | -5.141381191 |
| 1437025_at   | 0.093976143  | 3.407559176 | 1.038705531  | 0.324910235 | 0.324910235 | -5.141383565 |
| 1453657_at   | -0.085249896 | 5.110523541 | -1.038703458 | 0.324911151 | 0.324911151 | -5.141385407 |
| 1448619_at   | 0.096400574  | 7.986760592 | 1.038606412  | 0.32495401  | 0.32495401  | -5.141471624 |
| 1423667_at   | 0.072194242  | 11.3200822  | 1.038532171  | 0.324986801 | 0.324986801 | -5.141537576 |
| 1455912_x_at | 0.086697014  | 7.859699394 | 1.038492115  | 0.325004493 | 0.325004493 | -5.141573158 |
| 1452278_a_at | 0.078961697  | 6.453910181 | 1.038438976  | 0.325027966 | 0.325027966 | -5.14162036  |
| 1417971_at   | -0.095929022 | 7.543413508 | -1.038380254 | 0.325053906 | 0.325053906 | -5.14167252  |
| 1445466_at   | 0.093574962  | 4.841582909 | 1.038375079  | 0.325056192 | 0.325056192 | -5.141677116 |
| 1441931_x_at | -0.082274261 | 6.710612008 | -1.038263578 | 0.325105452 | 0.325105452 | -5.14177615  |
| 1450006_at   | 0.070791843  | 9.584393727 | 1.038125669  | 0.325166387 | 0.325166387 | -5.141898628 |
| 1458235_at   | -0.082189259 | 5.647652191 | -1.038084988 | 0.325184364 | 0.325184364 | -5.141934755 |
| 1421105_at   | 0.136262335  | 7.054059846 | 1.037981502  | 0.325230096 | 0.325230096 | -5.142026651 |
| 1434142_at   | 0.085351209  | 8.45678656  | 1.037918041  | 0.325258143 | 0.325258143 | -5.142083    |
| 1422514_at   | -0.116559007 | 8.314195703 | -1.037891477 | 0.325269884 | 0.325269884 | -5.142106587 |
| 1447721_at   | 0.069951791  | 3.163830953 | 1.037758045  | 0.325328863 | 0.325328863 | -5.142225056 |
| 1442064_at   | -0.071707605 | 6.35558406  | -1.037697957 | 0.325355425 | 0.325355425 | -5.142278403 |
| 1449767_x_at | -0.088959079 | 4.180156466 | -1.037618788 | 0.325390425 | 0.325390425 | -5.142348685 |
| 1444572_at   | -0.093581882 | 4.822531409 | -1.037439549 | 0.325469675 | 0.325469675 | -5.14250779  |
| 1432477_at   | 0.096933953  | 4.151515306 | 1.037426313  | 0.325475528 | 0.325475528 | -5.142519538 |
| 1420630_at   | 0.096546906  | 7.727682368 | 1.037306563  | 0.325528484 | 0.325528484 | -5.142625824 |
| 1426471_at   | -0.107010757 | 4.73944128  | -1.037252314 | 0.325552476 | 0.325552476 | -5.14267397  |
| 1416232_at   | 0.080641353  | 3.334250648 | 1.037120221  | 0.325610902 | 0.325610902 | -5.142791196 |
| 1442454_at   | 0.074951943  | 8.240225331 | 1.037107139  | 0.325616689 | 0.325616689 | -5.142802805 |
| 1429969_at   | -0.083418784 | 3.643348094 | -1.037106585 | 0.325616934 | 0.325616934 | -5.142803296 |
| 1437764_at   | 0.076563487  | 6.513062216 | 1.037081317  | 0.325628111 | 0.325628111 | -5.142825718 |
| 1429260_at   | 0.110494368  | 5.748435866 | 1.037068374  | 0.325633836 | 0.325633836 | -5.142837204 |
| 1434870_at   | 0.072439435  | 8.092311714 | 1.036972946  | 0.325676052 | 0.325676052 | -5.14292188  |
| 1455419_at   | -0.083687444 | 7.404491658 | -1.036927702 | 0.325696068 | 0.325696068 | -5.142962025 |
| 1422269_at   | -0.074420207 | 3.613216735 | -1.036879219 | 0.325717519 | 0.325717519 | -5.143005042 |
| 1440985_at   | -0.072478466 | 7.903653877 | -1.036872598 | 0.325720449 | 0.325720449 | -5.143010917 |
| 1458495_at   | -0.085968708 | 3.643962472 | -1.036741413 | 0.325778495 | 0.325778495 | -5.143127304 |
| 1435324_x_at | 0.067769911  | 12.76000148 | 1.036689416  | 0.325801505 | 0.325801505 | -5.143173432 |
| 1417820_at   | 0.095625821  | 7.929867028 | 1.036655059  | 0.325816709 | 0.325816709 | -5.14320391  |
| 1458480_at   | -0.106039994 | 6.005694676 | -1.036628086 | 0.325828646 | 0.325828646 | -5.143227838 |
| 1430746_at   | -0.082056635 | 4.047839434 | -1.036556436 | 0.325860356 | 0.325860356 | -5.143291395 |
| 1450400_at   | 0.084272056  | 8.03633643  | 1.036550651  | 0.325862917 | 0.325862917 | -5.143296527 |
| 1441528_at   | 0.13663793   | 6.468260693 | 1.036507591  | 0.325881975 | 0.325881975 | -5.143334721 |
| 1428183_at   | -0.072242498 | 6.971886205 | -1.036410093 | 0.325925132 | 0.325925132 | -5.143421199 |
| 1457589_at   | -0.107741651 | 8.529038624 | -1.036405493 | 0.325927168 | 0.325927168 | -5.143425279 |
| 1453604_a_at | 0.065959892  | 7.526188993 | 1.036399506  | 0.325929818 | 0.325929818 | -5.143430588 |
| 1418567_a_at | 0.080019624  | 10.04715996 | 1.036363598  | 0.325945713 | 0.325945713 | -5.143462436 |
| 1457105_at   | -0.084236631 | 4.875296035 | -1.03625275  | 0.325994787 | 0.325994787 | -5.143560744 |
| 1426744_at   | 0.107102235  | 8.62375219  | 1.036218035  | 0.326010156 | 0.326010156 | -5.14359153  |
| 1416564_at   | 0.082687518  | 7.417568285 | 1.036108932  | 0.326058464 | 0.326058464 | -5.143688279 |
| 1453174_at   | 0.084348634  | 7.535910277 | 1.036066547  | 0.326077232 | 0.326077232 | -5.143725863 |
| 1454232_at   | 0.111693976  | 3.732211328 | 1.036055024  | 0.326082334 | 0.326082334 | -5.143736081 |
| 1458121_at   | 0.166319802  | 5.671983363 | 1.036032259  | 0.326092416 | 0.326092416 | -5.143756266 |
| 1457722_at   | -0.099994008 | 3.526855618 | -1.036023316 | 0.326096376 | 0.326096376 | -5.143764196 |
| 1455022_at   | 0.074741753  | 8.1719528   | 1.035995658  | 0.326108624 | 0.326108624 | -5.14378872  |
| 1427633_a_at | -0.081170297 | 6.384549597 | -1.035834561 | 0.326179971 | 0.326179971 | -5.14393155  |
| 1434331_at   | 0.114002323  | 9.464756643 | 1.035828093  | 0.326182836 | 0.326182836 | -5.143937284 |
| 1454228_a_at | -0.09823096  | 5.906377728 | -1.035814397 | 0.326188902 | 0.326188902 | -5.143949426 |

|              |              |             |              |             |             |              |
|--------------|--------------|-------------|--------------|-------------|-------------|--------------|
| 1433288_at   | -0.090454473 | 3.901602539 | -1.035789629 | 0.326199873 | 0.326199873 | -5.143971384 |
| 1431394_a_at | -0.084514085 | 7.340049771 | -1.035762535 | 0.326211874 | 0.326211874 | -5.143995404 |
| 1454973_at   | 0.094190378  | 8.838294592 | 1.035659961  | 0.326257312 | 0.326257312 | -5.144086333 |
| 1450116_at   | 0.068506891  | 7.661409808 | 1.035579846  | 0.326292804 | 0.326292804 | -5.144157348 |
| 1441111_at   | -0.274709391 | 5.686188888 | -1.035563709 | 0.326299954 | 0.326299954 | -5.144171652 |
| 1437495_at   | -0.140082179 | 6.699125914 | -1.035527907 | 0.326315816 | 0.326315816 | -5.144203386 |
| 1416853_at   | -0.136545943 | 7.227461862 | -1.035438895 | 0.326355256 | 0.326355256 | -5.144282228 |
| 1426797_at   | -0.079968787 | 7.580161004 | -1.03542953  | 0.326359405 | 0.326359405 | -5.144290579 |
| 1428833_at   | 0.077686549  | 6.325852461 | 1.035420778  | 0.326363283 | 0.326363283 | -5.144298336 |
| 1460459_at   | 0.11373562   | 5.073681112 | 1.035346704  | 0.326396108 | 0.326396108 | -5.144363986 |
| 1441978_at   | -0.086269458 | 3.337037603 | -1.035277725 | 0.326426676 | 0.326426676 | -5.144425116 |
| 1441278_at   | -0.073034043 | 4.315872216 | -1.035251832 | 0.326438151 | 0.326438151 | -5.144448062 |
| 1427625_a_at | -0.12022502  | 4.026842262 | -1.035240489 | 0.326443179 | 0.326443179 | -5.144458114 |
| 1416744_at   | 0.081651648  | 3.765303724 | 1.03521948   | 0.32645249  | 0.32645249  | -5.144476731 |
| 1429950_at   | -0.120357176 | 4.12745575  | -1.035182935 | 0.326468687 | 0.326468687 | -5.144509115 |
| 1429538_a_at | -0.088458487 | 9.869963493 | -1.035144108 | 0.326485896 | 0.326485896 | -5.14454352  |
| 1448766_at   | -0.11438667  | 3.665831704 | -1.035140487 | 0.326487501 | 0.326487501 | -5.144546729 |
| 1438375_at   | 0.10605357   | 3.515579823 | 1.035069303  | 0.326519054 | 0.326519054 | -5.144609804 |
| 1437807_x_at | 0.117604414  | 11.17341662 | 1.035065367  | 0.326520798 | 0.326520798 | -5.144613291 |
| 1441564_at   | -0.076577847 | 3.316573777 | -1.035045314 | 0.326529687 | 0.326529687 | -5.144631059 |
| 1449574_a_at | 0.061938773  | 11.87765947 | 1.035045026  | 0.326529815 | 0.326529815 | -5.144631314 |
| 1442768_at   | -0.083388369 | 6.162337517 | -1.034920085 | 0.326585203 | 0.326585203 | -5.144742012 |
| 1450703_at   | -0.082650352 | 4.380572974 | -1.034903261 | 0.326592661 | 0.326592661 | -5.144756917 |
| 1424830_at   | -0.07402304  | 6.19568018  | -1.034886222 | 0.326600215 | 0.326600215 | -5.144772013 |
| 1442086_at   | -0.115587582 | 5.808824799 | -1.034873201 | 0.326605989 | 0.326605989 | -5.144783549 |
| 1440590_at   | 0.097418248  | 6.115641335 | 1.034871605  | 0.326606696 | 0.326606696 | -5.144784962 |
| 1441981_at   | -0.083831742 | 3.289740316 | -1.034744572 | 0.326663021 | 0.326663021 | -5.144897498 |
| 1439725_at   | 0.113336999  | 5.42040612  | 1.034744261  | 0.326663159 | 0.326663159 | -5.144897774 |
| 1455124_at   | 0.167109944  | 6.085389633 | 1.034713801  | 0.326676666 | 0.326676666 | -5.144924757 |
| 1459147_at   | -0.071074789 | 5.060247015 | -1.034681227 | 0.32669111  | 0.32669111  | -5.144953611 |
| 1441110_at   | -0.065819989 | 3.264118549 | -1.034636094 | 0.326711125 | 0.326711125 | -5.144993589 |
| 1450127_a_at | 0.072371767  | 5.861957601 | 1.034596072  | 0.326728874 | 0.326728874 | -5.145029039 |
| 1454832_at   | 0.086055384  | 6.036612915 | 1.034564009  | 0.326743093 | 0.326743093 | -5.145057439 |
| 1436062_at   | -0.127709113 | 8.684308497 | -1.034472342 | 0.326783749 | 0.326783749 | -5.145138627 |
| 1438613_at   | 0.113126143  | 3.410988598 | 1.0344586    | 0.326789845 | 0.326789845 | -5.145150798 |
| 1456952_at   | -0.072722346 | 7.969660767 | -1.034397116 | 0.326817117 | 0.326817117 | -5.14520525  |
| 1455815_a_at | 0.073731685  | 12.62387053 | 1.034390186  | 0.326820191 | 0.326820191 | -5.145211388 |
| 1427921_s_at | 0.070473971  | 8.584167966 | 1.03426131   | 0.326877361 | 0.326877361 | -5.145325516 |
| 1417873_at   | 0.068071796  | 9.630584599 | 1.03419545   | 0.32690658  | 0.32690658  | -5.145383835 |
| 1448887_x_at | -0.078937255 | 8.863360668 | -1.034181888 | 0.326912597 | 0.326912597 | -5.145395844 |
| 1450492_at   | -0.066744553 | 3.725641863 | -1.034138406 | 0.32693189  | 0.32693189  | -5.145434346 |
| 1460366_at   | -0.082205868 | 7.753711942 | -1.034076084 | 0.326959542 | 0.326959542 | -5.145489526 |
| 1439389_s_at | 0.098295014  | 10.25554353 | 1.034062074  | 0.326965759 | 0.326965759 | -5.145501931 |
| 1439314_at   | 0.100808429  | 6.064655867 | 1.034049889  | 0.326971166 | 0.326971166 | -5.14551272  |
| 1429910_at   | -0.143012005 | 6.185137496 | -1.033989405 | 0.326998005 | 0.326998005 | -5.14556627  |
| 1451166_a_at | 0.100306569  | 8.149109102 | 1.03395158   | 0.327014791 | 0.327014791 | -5.145599758 |
| 1455898_x_at | 0.08440831   | 7.202451073 | 1.033741178  | 0.327108173 | 0.327108173 | -5.145786017 |
| 1455676_x_at | -0.071145946 | 9.477479125 | -1.033687316 | 0.327132082 | 0.327132082 | -5.145833693 |
| 1430069_at   | 0.078613978  | 3.919173599 | 1.033610643  | 0.327166118 | 0.327166118 | -5.145901558 |
| 1435944_s_at | 0.138891447  | 4.256343733 | 1.033587199  | 0.327176526 | 0.327176526 | -5.145922309 |
| 1428127_at   | 0.063260088  | 10.60619067 | 1.033440244  | 0.327241771 | 0.327241771 | -5.146052368 |
| 1440172_s_at | -0.081135528 | 3.194925742 | -1.033393146 | 0.327262683 | 0.327262683 | -5.146094049 |
| 1452434_s_at | -0.067194542 | 8.435394103 | -1.033368708 | 0.327273535 | 0.327273535 | -5.146115676 |

|              |              |             |              |             |             |              |
|--------------|--------------|-------------|--------------|-------------|-------------|--------------|
| 1442672_at   | -0.105577802 | 6.385238997 | -1.033313011 | 0.327298267 | 0.327298267 | -5.146164963 |
| 1459308_at   | 0.083253211  | 4.851184851 | 1.033309578  | 0.327299792 | 0.327299792 | -5.146168    |
| 1454937_at   | 0.10007803   | 8.580429376 | 1.033289937  | 0.327308514 | 0.327308514 | -5.146185381 |
| 1418321_at   | -0.070932339 | 8.532086328 | -1.033254922 | 0.327324064 | 0.327324064 | -5.146216365 |
| 1421936_at   | -0.081736915 | 5.683068256 | -1.033222045 | 0.327338664 | 0.327338664 | -5.146245455 |
| 1447518_at   | -0.107399808 | 5.602868067 | -1.033199474 | 0.327348689 | 0.327348689 | -5.146265428 |
| 1416182_at   | -0.081335139 | 7.784591584 | -1.03309497  | 0.327395104 | 0.327395104 | -5.146357891 |
| 1453142_at   | -0.085264327 | 4.447744836 | -1.03292007  | 0.327472796 | 0.327472796 | -5.146512625 |
| 1439847_s_at | -0.163040195 | 8.650450282 | -1.032880049 | 0.327490575 | 0.327490575 | -5.146548029 |
| 1431649_at   | -0.070402926 | 3.273498281 | -1.032795392 | 0.327528188 | 0.327528188 | -5.146622916 |
| 1416423_x_at | 0.105242908  | 7.857335475 | 1.032770104  | 0.327539423 | 0.327539423 | -5.146645285 |
| 1421205_at   | -0.425496932 | 7.29694957  | -1.032766067 | 0.327541217 | 0.327541217 | -5.146648856 |
| 1426324_at   | -0.167151784 | 5.087157302 | -1.032755026 | 0.327546123 | 0.327546123 | -5.146658622 |
| 1447837_x_at | -0.098611493 | 8.03220319  | -1.032753988 | 0.327546584 | 0.327546584 | -5.14665954  |
| 1459098_at   | 0.093131564  | 6.253901686 | 1.032601413  | 0.327614382 | 0.327614382 | -5.14679449  |
| 1456230_at   | -0.120940609 | 4.367244467 | -1.032585227 | 0.327621575 | 0.327621575 | -5.146808805 |
| 1437587_at   | 0.069762605  | 5.45700614  | 1.032533589  | 0.327644524 | 0.327644524 | -5.146854474 |
| 1444757_at   | 0.155760665  | 6.348047077 | 1.03252932   | 0.327646421 | 0.327646421 | -5.14685825  |
| 1443260_at   | 0.12672124   | 7.654873948 | 1.032431101  | 0.327690074 | 0.327690074 | -5.14694511  |
| 1428147_at   | -0.096371202 | 6.984333233 | -1.032430544 | 0.327690322 | 0.327690322 | -5.146945602 |
| 1416959_at   | -0.124132633 | 4.718071244 | -1.032386822 | 0.327709756 | 0.327709756 | -5.146984267 |
| 1455854_a_at | 0.073989763  | 9.305323285 | 1.032273083  | 0.327760315 | 0.327760315 | -5.147084841 |
| 1455481_at   | 0.087214765  | 9.984930772 | 1.032255958  | 0.327767928 | 0.327767928 | -5.147099983 |
| 1432344_a_at | 0.105348044  | 7.806580439 | 1.032196371  | 0.327794418 | 0.327794418 | -5.147152668 |
| 1444833_at   | 0.105026718  | 4.090306498 | 1.032106966  | 0.327834167 | 0.327834167 | -5.147231715 |
| 1442663_at   | 0.089842182  | 5.479777733 | 1.032073239  | 0.327849164 | 0.327849164 | -5.147261533 |
| 1451047_at   | -0.088139583 | 12.07409635 | -1.032071626 | 0.327849881 | 0.327849881 | -5.147262959 |
| 1436105_at   | -0.067591489 | 5.619970267 | -1.032059726 | 0.327855172 | 0.327855172 | -5.14727348  |
| 1423931_s_at | 0.075315986  | 10.43040623 | 1.032044941  | 0.327861746 | 0.327861746 | -5.14728655  |
| 1430467_at   | 0.121238568  | 3.952077193 | 1.03203192   | 0.327867536 | 0.327867536 | -5.147298062 |
| 1419480_at   | -0.123820706 | 4.009998386 | -1.031896326 | 0.327927832 | 0.327927832 | -5.147417929 |
| 1439881_at   | -0.105910664 | 4.113488114 | -1.031841078 | 0.327952403 | 0.327952403 | -5.147466765 |
| 1429587_at   | 0.132233027  | 8.168037611 | 1.031570561  | 0.32807273  | 0.32807273  | -5.14770586  |
| 1420637_at   | 0.080012678  | 7.089145155 | 1.03147933   | 0.328113317 | 0.328113317 | -5.147786483 |
| 1445581_at   | -0.103005015 | 3.513415757 | -1.03147843  | 0.328113717 | 0.328113717 | -5.147787278 |
| 1453464_at   | -0.087053929 | 3.405991362 | -1.03147713  | 0.328114296 | 0.328114296 | -5.147788428 |
| 1416013_at   | -0.078599652 | 8.950149013 | -1.031443054 | 0.328129457 | 0.328129457 | -5.14781854  |
| 1417193_at   | -0.067622214 | 9.271568488 | -1.031347898 | 0.328171796 | 0.328171796 | -5.147902624 |
| 1419389_at   | 0.067763225  | 6.582776447 | 1.031318521  | 0.328184868 | 0.328184868 | -5.14792858  |
| 1443238_at   | 0.083942002  | 6.592935974 | 1.031315995  | 0.328185992 | 0.328185992 | -5.147930813 |
| 1458771_at   | -0.075129656 | 3.491115547 | -1.031307027 | 0.328189983 | 0.328189983 | -5.147938737 |
| 1444370_at   | 0.073878663  | 3.512833313 | 1.031291052  | 0.328197091 | 0.328197091 | -5.147952852 |
| 1425508_s_at | 0.064235646  | 8.524937758 | 1.031269525  | 0.328206671 | 0.328206671 | -5.147971872 |
| 1456343_at   | -0.087318492 | 4.14379674  | -1.031251687 | 0.328214609 | 0.328214609 | -5.147987633 |
| 1448061_at   | 0.234758806  | 6.677721337 | 1.031237311  | 0.328221006 | 0.328221006 | -5.148000335 |
| 1425138_at   | -0.119227024 | 5.860837909 | -1.031128671 | 0.328269355 | 0.328269355 | -5.148096318 |
| 1434349_at   | 0.089282257  | 7.191821799 | 1.031104267  | 0.328280217 | 0.328280217 | -5.148117878 |
| 1427430_at   | 0.104848723  | 6.985460617 | 1.03109511   | 0.328284292 | 0.328284292 | -5.148125968 |
| 1429735_at   | 0.070033692  | 8.192425644 | 1.030971836  | 0.328339163 | 0.328339163 | -5.148234869 |
| 1430766_at   | -0.109517932 | 4.086994502 | -1.030926474 | 0.328359356 | 0.328359356 | -5.148274939 |
| 1444755_at   | -0.078097413 | 3.725806843 | -1.030757966 | 0.328434375 | 0.328434375 | -5.148423777 |
| 1430087_at   | -0.083183737 | 3.766493035 | -1.030745118 | 0.328440096 | 0.328440096 | -5.148435125 |
| 1430569_at   | -0.157018005 | 5.92993721  | -1.030470901 | 0.328562205 | 0.328562205 | -5.148677292 |



|              |              |             |              |             |             |              |
|--------------|--------------|-------------|--------------|-------------|-------------|--------------|
| 1451831_at   | -0.076003763 | 4.965224833 | -1.030470546 | 0.328562364 | 0.328562364 | -5.148677605 |
| 1444539_at   | 0.088608373  | 6.42626999  | 1.030462819  | 0.328565805 | 0.328565805 | -5.148684428 |
| 1438268_at   | 0.102567625  | 8.13155357  | 1.030417869  | 0.328585825 | 0.328585825 | -5.14872412  |
| 1440253_at   | 0.103199363  | 10.36764935 | 1.030390662  | 0.328597943 | 0.328597943 | -5.148748143 |
| 1453861_at   | -0.068732944 | 4.876912482 | -1.03032031  | 0.328629279 | 0.328629279 | -5.14881026  |
| 1419655_at   | 0.084826563  | 9.415453462 | 1.030185974  | 0.328689121 | 0.328689121 | -5.148928864 |
| 1438172_x_at | 0.118771989  | 7.52280894  | 1.030163145  | 0.328699291 | 0.328699291 | -5.148949019 |
| 1423364_a_at | 0.067392466  | 7.64507563  | 1.030139161  | 0.328709976 | 0.328709976 | -5.148970192 |
| 1435054_at   | 0.106935439  | 7.310498083 | 1.030087204  | 0.328733125 | 0.328733125 | -5.149016059 |
| 1453216_at   | -0.094503598 | 6.47147894  | -1.030073475 | 0.328739241 | 0.328739241 | -5.149028179 |
| 1449914_at   | -0.148966328 | 5.938634069 | -1.030027109 | 0.3287599   | 0.3287599   | -5.149069108 |
| 1443046_at   | 0.089714701  | 5.460642226 | 1.030026998  | 0.32875995  | 0.32875995  | -5.149069207 |
| 1452068_at   | 0.095283065  | 5.075531934 | 1.029973952  | 0.328783586 | 0.328783586 | -5.149116031 |
| 1460170_at   | -0.083791432 | 9.693037739 | -1.029960396 | 0.328789627 | 0.328789627 | -5.149127997 |
| 1448907_at   | -0.107002826 | 8.08294281  | -1.029932193 | 0.328802194 | 0.328802194 | -5.149152892 |
| 1436384_at   | 0.090246124  | 6.936158144 | 1.02968659   | 0.328911651 | 0.328911651 | -5.149369659 |
| 1433434_at   | -0.097518183 | 11.27401761 | -1.029654923 | 0.328925766 | 0.328925766 | -5.149397605 |
| 1460473_at   | -0.090516423 | 3.710869071 | -1.029654655 | 0.328925886 | 0.328925886 | -5.149397842 |
| 1437082_at   | 0.254048982  | 8.524353529 | 1.029634607  | 0.328934822 | 0.328934822 | -5.149415534 |
| 1450516_a_at | -0.081722775 | 4.376877886 | -1.029588523 | 0.328955365 | 0.328955365 | -5.149456202 |
| 1456627_at   | 0.100801305  | 3.555962286 | 1.029558817  | 0.328968607 | 0.328968607 | -5.149482415 |
| 1446150_at   | -0.090890682 | 6.81204792  | -1.029252317 | 0.32910526  | 0.32910526  | -5.149752849 |
| 1433620_at   | -0.069566636 | 8.076126682 | -1.029189101 | 0.329133451 | 0.329133451 | -5.149808619 |
| 1422599_s_at | -0.099604937 | 7.077539646 | -1.029132009 | 0.329158912 | 0.329158912 | -5.149858983 |
| 1448374_at   | 0.160003833  | 6.632948995 | 1.029084459  | 0.329180119 | 0.329180119 | -5.149900929 |
| 1448796_s_at | -0.128583485 | 7.572966352 | -1.029055101 | 0.329193212 | 0.329193212 | -5.149926825 |
| 1447023_at   | -0.110691919 | 4.151868017 | -1.029039353 | 0.329200236 | 0.329200236 | -5.149940717 |
| 1417299_at   | -0.119392181 | 6.978003695 | -1.028965193 | 0.329233314 | 0.329233314 | -5.150006131 |
| 1449125_at   | 0.064351589  | 7.692666936 | 1.02895117   | 0.329239569 | 0.329239569 | -5.150018499 |
| 1453515_at   | 0.110733324  | 5.125569253 | 1.028934714  | 0.32924691  | 0.32924691  | -5.150033013 |
| 1420969_at   | -0.117924269 | 8.334341313 | -1.028854757 | 0.329282578 | 0.329282578 | -5.150103535 |
| 1417370_at   | -0.076439577 | 4.722546415 | -1.028844585 | 0.329287115 | 0.329287115 | -5.150112506 |
| 1452260_at   | -0.071934132 | 3.627671434 | -1.028772419 | 0.32931931  | 0.32931931  | -5.150176152 |
| 1445740_at   | 0.103151416  | 3.232915302 | 1.028700384  | 0.329351449 | 0.329351449 | -5.150239678 |
| 1437255_at   | -0.087141299 | 5.52020617  | -1.028628233 | 0.329383642 | 0.329383642 | -5.150303304 |
| 1437862_at   | 0.111556973  | 9.777890931 | 1.028585476  | 0.329402721 | 0.329402721 | -5.150341007 |
| 1429984_at   | 0.15685907   | 5.971851304 | 1.028486927  | 0.329446699 | 0.329446699 | -5.150427903 |
| 1444319_at   | 0.083417128  | 5.592121887 | 1.028461259  | 0.329458154 | 0.329458154 | -5.150450535 |
| 1439613_at   | -0.094436875 | 4.41498715  | -1.028376973 | 0.329495771 | 0.329495771 | -5.150524848 |
| 1434479_at   | -0.090477598 | 10.40878195 | -1.028356655 | 0.329504839 | 0.329504839 | -5.150542761 |
| 1451930_at   | -0.099054923 | 8.027277689 | -1.028356594 | 0.329504866 | 0.329504866 | -5.150542815 |
| 1428244_at   | -0.094064352 | 9.946000377 | -1.028302625 | 0.329528955 | 0.329528955 | -5.150590395 |
| 1435640_x_at | 0.105585267  | 3.117194753 | 1.028255332  | 0.329550065 | 0.329550065 | -5.150632088 |
| 1448095_at   | 0.155974289  | 6.716233554 | 1.028151193  | 0.329596553 | 0.329596553 | -5.15072389  |
| 1419669_at   | 0.154242624  | 5.532963139 | 1.028095091  | 0.329621599 | 0.329621599 | -5.150773343 |
| 1460255_at   | -0.102191782 | 4.055744284 | -1.028011245 | 0.329659034 | 0.329659034 | -5.150847248 |
| 1420331_at   | 0.07899023   | 3.457991368 | 1.028003406  | 0.329662534 | 0.329662534 | -5.150854157 |
| 1460004_x_at | 0.086759807  | 9.819043127 | 1.027993197  | 0.329667092 | 0.329667092 | -5.150863155 |
| 1425133_s_at | -0.079735557 | 7.107907199 | -1.027977389 | 0.32967415  | 0.32967415  | -5.150877088 |
| 1437527_x_at | 0.092340256  | 10.13160898 | 1.027966823  | 0.329678868 | 0.329678868 | -5.150886401 |
| 1442964_at   | 0.094684169  | 5.27478631  | 1.027950774  | 0.329686034 | 0.329686034 | -5.150900546 |
| 1447017_at   | 0.076464006  | 3.403635242 | 1.027936711  | 0.329692314 | 0.329692314 | -5.150912941 |
| 1457717_at   | -0.072176645 | 5.270766443 | -1.027888155 | 0.329713995 | 0.329713995 | -5.150955735 |

|              |              |             |              |             |             |              |
|--------------|--------------|-------------|--------------|-------------|-------------|--------------|
| 1417013_at   | 0.10360584   | 7.762797882 | 1.027877306  | 0.32971884  | 0.32971884  | -5.150965297 |
| 1415739_at   | 0.11525844   | 9.456030057 | 1.027755916  | 0.32977305  | 0.32977305  | -5.151072275 |
| 1453691_at   | -0.076624899 | 3.992816137 | -1.02775102  | 0.329775237 | 0.329775237 | -5.15107659  |
| 1421951_at   | -0.101059019 | 3.956135262 | -1.027718068 | 0.329789954 | 0.329789954 | -5.151105628 |
| 1436283_at   | -0.120798358 | 4.367200643 | -1.027631371 | 0.329828676 | 0.329828676 | -5.151182024 |
| 1436694_s_at | 0.073427019  | 3.231335061 | 1.027499037  | 0.329887789 | 0.329887789 | -5.151298625 |
| 1444679_at   | -0.105692033 | 7.346272958 | -1.02741854  | 0.32992375  | 0.32992375  | -5.151369546 |
| 1418838_at   | -0.105634334 | 8.223850329 | -1.027394847 | 0.329934335 | 0.329934335 | -5.15139042  |
| 1449407_at   | -0.074574337 | 8.089094368 | -1.02737004  | 0.329945419 | 0.329945419 | -5.151412275 |
| 1418682_at   | 0.104780841  | 3.671118005 | 1.02734761   | 0.32995544  | 0.32995544  | -5.151432035 |
| 1449642_at   | 0.068768359  | 3.688065817 | 1.027142017  | 0.330047307 | 0.330047307 | -5.151613143 |
| 1443225_at   | 0.073057871  | 3.233374115 | 1.027126317  | 0.330054323 | 0.330054323 | -5.151626971 |
| 1442339_at   | 0.109476142  | 3.643156623 | 1.02711114   | 0.330061105 | 0.330061105 | -5.15164034  |
| 1454195_at   | -0.079244244 | 5.379360818 | -1.02703205  | 0.330096452 | 0.330096452 | -5.151710001 |
| 1430259_at   | 0.091905987  | 3.833371381 | 1.027027724  | 0.330098386 | 0.330098386 | -5.151713811 |
| 1441161_at   | 0.168460256  | 4.723198223 | 1.0270039    | 0.330109034 | 0.330109034 | -5.151734795 |
| 1443691_at   | 0.107285883  | 5.565912919 | 1.026993957  | 0.330113478 | 0.330113478 | -5.151743551 |
| 1450607_s_at | -0.08073466  | 4.784267741 | -1.026946789 | 0.33013456  | 0.33013456  | -5.151785094 |
| 1426398_at   | -0.085081291 | 8.936220533 | -1.026945061 | 0.330135332 | 0.330135332 | -5.151786615 |
| 1446828_at   | 0.0703479    | 3.326532573 | 1.026930373  | 0.330141898 | 0.330141898 | -5.151799551 |
| 1446445_at   | 0.144046824  | 5.900245239 | 1.026877068  | 0.330165725 | 0.330165725 | -5.151846496 |
| 1422654_at   | -0.10242723  | 5.600305355 | -1.02685763  | 0.330174414 | 0.330174414 | -5.151863614 |
| 1423503_at   | -0.069512922 | 8.736033597 | -1.026856795 | 0.330174787 | 0.330174787 | -5.151864349 |
| 1436393_a_at | -0.074758411 | 8.305916525 | -1.026766672 | 0.330215075 | 0.330215075 | -5.151943712 |
| 1416124_at   | -0.086190183 | 7.961405628 | -1.026733377 | 0.33022996  | 0.33022996  | -5.151973031 |
| 1435345_at   | -0.183710692 | 8.271344166 | -1.02673144  | 0.330230826 | 0.330230826 | -5.151974737 |
| 1447849_s_at | 0.106801095  | 8.655386007 | 1.026637927  | 0.330272635 | 0.330272635 | -5.152057078 |
| 1426349_s_at | 0.08020873   | 9.682104553 | 1.026536554  | 0.330317963 | 0.330317963 | -5.152146333 |
| 1455057_at   | 0.095242815  | 8.618568075 | 1.026516422  | 0.330326965 | 0.330326965 | -5.152164058 |
| 1422359_at   | -0.079920097 | 3.924818389 | -1.026497012 | 0.330335645 | 0.330335645 | -5.152181147 |
| 1422193_at   | -0.079053697 | 4.394801609 | -1.026454831 | 0.330354508 | 0.330354508 | -5.152218283 |
| 1447902_at   | -0.104261011 | 5.569119237 | -1.026439946 | 0.330361165 | 0.330361165 | -5.152231387 |
| 1453141_at   | 0.086637539  | 6.615086622 | 1.026438317  | 0.330361893 | 0.330361893 | -5.152232821 |
| 1418245_a_at | -0.110641046 | 9.278571641 | -1.026381073 | 0.330387494 | 0.330387494 | -5.152283216 |
| 1452378_at   | 0.218013282  | 7.824657113 | 1.026323768  | 0.330413124 | 0.330413124 | -5.152333663 |
| 1424472_at   | -0.084417467 | 7.478381865 | -1.026226668 | 0.330456555 | 0.330456555 | -5.152419136 |
| 1458487_at   | -0.086888427 | 4.725778865 | -1.026164312 | 0.330484448 | 0.330484448 | -5.152474022 |
| 1435830_a_at | -0.086974627 | 4.443347996 | -1.026144847 | 0.330493155 | 0.330493155 | -5.152491155 |
| 1422436_at   | -0.07504083  | 5.263640035 | -1.026114584 | 0.330506693 | 0.330506693 | -5.152517791 |
| 1440133_x_at | 0.086368385  | 7.652935911 | 1.026064673  | 0.330529021 | 0.330529021 | -5.15256172  |
| 1444408_at   | 0.09649302   | 6.466614217 | 1.026047878  | 0.330536535 | 0.330536535 | -5.152576501 |
| 1440046_at   | 0.093004014  | 5.796503626 | 1.026027808  | 0.330545514 | 0.330545514 | -5.152594165 |
| 1444699_at   | 0.137869041  | 4.777357635 | 1.025995954  | 0.330559766 | 0.330559766 | -5.152622199 |
| 1429753_at   | 0.100811485  | 6.621935733 | 1.025956775  | 0.330577295 | 0.330577295 | -5.152656679 |
| 1442618_at   | -0.097583572 | 5.747993101 | -1.025901091 | 0.330602211 | 0.330602211 | -5.152705683 |
| 1438397_a_at | 0.078214969  | 8.802540732 | 1.025841231  | 0.330628996 | 0.330628996 | -5.152758359 |
| 1430327_at   | 0.075628443  | 6.483820508 | 1.025821663  | 0.330637752 | 0.330637752 | -5.152775579 |
| 1428763_at   | 0.082944993  | 7.931364398 | 1.025600889  | 0.330736557 | 0.330736557 | -5.152969835 |
| 1449094_at   | 0.075875925  | 9.831678034 | 1.025554181  | 0.330757464 | 0.330757464 | -5.153010929 |
| 1416936_at   | 0.107488517  | 6.454027282 | 1.025540882  | 0.330763416 | 0.330763416 | -5.153022629 |
| 1449389_at   | 0.125638882  | 6.210973125 | 1.025438513  | 0.330809241 | 0.330809241 | -5.153112687 |
| 1447259_at   | 0.070007952  | 3.796554066 | 1.025410006  | 0.330822003 | 0.330822003 | -5.153137764 |
| 1455414_at   | -0.160277642 | 4.69070232  | -1.025367678 | 0.330840953 | 0.330840953 | -5.153175    |

|                   |              |             |              |             |             |              |
|-------------------|--------------|-------------|--------------|-------------|-------------|--------------|
| 1443482_at        | -0.06095977  | 3.737577643 | -1.025320989 | 0.330861855 | 0.330861855 | -5.153216069 |
| 1417131_at        | 0.084455012  | 9.695599676 | 1.025284197  | 0.330878328 | 0.330878328 | -5.153248432 |
| 1440690_at        | 0.081912866  | 6.959180463 | 1.025263412  | 0.330887634 | 0.330887634 | -5.153266715 |
| 1431592_a_at      | 0.105315952  | 7.520844598 | 1.025212632  | 0.330910371 | 0.330910371 | -5.153311379 |
| 1428379_at        | -0.07937307  | 3.447999226 | -1.025208679 | 0.330912142 | 0.330912142 | -5.153314857 |
| 1441166_at        | -0.092780905 | 5.229683915 | -1.025181932 | 0.330924118 | 0.330924118 | -5.153338382 |
| 1424439_at        | -0.095158571 | 4.229527535 | -1.025169199 | 0.33092982  | 0.33092982  | -5.153349581 |
| AFFX-PyruCarbMur/ | -0.089866209 | 6.39431425  | -1.025154822 | 0.330936258 | 0.330936258 | -5.153362226 |
| 1451131_at        | 0.096961537  | 10.30626374 | 1.025070166  | 0.330974168 | 0.330974168 | -5.15343668  |
| 1429820_at        | -0.079866488 | 3.972775205 | -1.025007693 | 0.331002146 | 0.331002146 | -5.153491621 |
| 1443751_at        | -0.133402146 | 5.047862758 | -1.024985377 | 0.331012141 | 0.331012141 | -5.153511247 |
| 1432589_at        | -0.118861217 | 7.231545827 | -1.024908105 | 0.33104675  | 0.33104675  | -5.153579198 |
| 1452595_at        | -0.079841148 | 7.787431136 | -1.024813853 | 0.331088968 | 0.331088968 | -5.153662076 |
| 1436746_at        | 0.210801371  | 9.886121343 | 1.024805107  | 0.331092885 | 0.331092885 | -5.153669766 |
| 1439768_x_at      | 0.253961712  | 6.449789521 | 1.024699822  | 0.331140051 | 0.331140051 | -5.153762338 |
| 1428780_at        | -0.072699653 | 5.248841572 | -1.02464347  | 0.331165297 | 0.331165297 | -5.153811883 |
| 1427807_at        | -0.135256984 | 5.087481396 | -1.024615107 | 0.331178005 | 0.331178005 | -5.15383682  |
| 1430711_at        | -0.08695291  | 3.910001469 | -1.024588761 | 0.331189809 | 0.331189809 | -5.153859982 |
| 1434872_x_at      | 0.093054923  | 12.98160869 | 1.024579831  | 0.33119381  | 0.33119381  | -5.153867833 |
| 1443568_x_at      | 0.066868225  | 3.280032353 | 1.024536362  | 0.331213287 | 0.331213287 | -5.153906047 |
| 1451464_at        | -0.068476927 | 6.735820001 | -1.024522961 | 0.331219292 | 0.331219292 | -5.153917828 |
| 1448403_at        | 0.09729144   | 9.46181207  | 1.024497255  | 0.331230811 | 0.331230811 | -5.153940426 |
| 1455685_at        | -0.129123522 | 5.480938305 | -1.024422345 | 0.331264378 | 0.331264378 | -5.154006276 |
| 1425953_at        | 0.129396387  | 5.021941163 | 1.024400502  | 0.331274167 | 0.331274167 | -5.154025476 |
| 1456662_at        | 0.095054706  | 6.007933677 | 1.024361485  | 0.331291652 | 0.331291652 | -5.154059773 |
| 1450971_at        | 0.088943667  | 8.851341676 | 1.024351807  | 0.33129599  | 0.33129599  | -5.15406828  |
| 1432280_at        | -0.084573095 | 4.615726039 | -1.024125042 | 0.331397628 | 0.331397628 | -5.154267587 |
| 1459912_at        | -0.071668686 | 3.21844187  | -1.024109056 | 0.331404794 | 0.331404794 | -5.154281635 |
| 1435248_a_at      | 0.082557806  | 9.406298697 | 1.023932216  | 0.331484074 | 0.331484074 | -5.154437037 |
| 1423493_a_at      | -0.106210988 | 10.16348212 | -1.023895685 | 0.331500453 | 0.331500453 | -5.154469137 |
| 1420199_at        | 0.107654974  | 3.478653413 | 1.02387515   | 0.33150966  | 0.33150966  | -5.154487181 |
| 1446611_at        | 0.105667428  | 5.910575722 | 1.023863079  | 0.331515072 | 0.331515072 | -5.154497787 |
| 1445074_at        | 0.088169779  | 4.607421843 | 1.023788814  | 0.331548373 | 0.331548373 | -5.154563039 |
| 1433613_at        | 0.067715196  | 9.639561458 | 1.023714072  | 0.33158189  | 0.33158189  | -5.154628707 |
| 1436502_at        | 0.082052866  | 6.10292948  | 1.023697473  | 0.331589334 | 0.331589334 | -5.15464329  |
| 1444153_at        | -0.095199066 | 3.433104753 | -1.02367528  | 0.331599287 | 0.331599287 | -5.154662788 |
| 1459683_at        | -0.090579633 | 3.644958915 | -1.023595032 | 0.331635277 | 0.331635277 | -5.154733287 |
| 1450858_a_at      | 0.068071262  | 11.06555206 | 1.023566058  | 0.331648272 | 0.331648272 | -5.15475874  |
| 1419446_at        | 0.131685623  | 6.005187037 | 1.02355612   | 0.33165273  | 0.33165273  | -5.15476747  |
| 1458415_at        | -0.075259669 | 5.476825386 | -1.023516484 | 0.331670508 | 0.331670508 | -5.154802288 |
| 1440024_at        | -0.095988594 | 4.355149819 | -1.02344265  | 0.331703626 | 0.331703626 | -5.154867144 |
| 1451441_at        | -0.115905089 | 3.662826027 | -1.023433486 | 0.331707737 | 0.331707737 | -5.154875194 |
| 1421984_at        | -0.076206591 | 5.0230796   | -1.023424667 | 0.331711693 | 0.331711693 | -5.15488294  |
| 1427315_at        | -0.116912511 | 3.513098042 | -1.023400304 | 0.331722622 | 0.331722622 | -5.15490434  |
| 1430433_at        | 0.126370005  | 4.564718498 | 1.023390898  | 0.331726842 | 0.331726842 | -5.154912602 |
| 1444401_at        | 0.241017652  | 7.260045679 | 1.023342231  | 0.331748674 | 0.331748674 | -5.154955348 |
| 1445151_at        | -0.095492989 | 6.480214186 | -1.023259299 | 0.331785881 | 0.331785881 | -5.155028187 |
| 1433536_at        | 0.205905962  | 5.967196743 | 1.023227922  | 0.331799959 | 0.331799959 | -5.155055744 |
| 1420797_at        | 0.083313104  | 4.99484359  | 1.023000232  | 0.331902129 | 0.331902129 | -5.155255694 |
| 1434174_at        | 0.077819434  | 8.486023267 | 1.022992427  | 0.331905632 | 0.331905632 | -5.155262547 |
| 1441118_at        | -0.07859589  | 4.533208304 | -1.022940287 | 0.331929032 | 0.331929032 | -5.15530833  |
| 1436724_a_at      | 0.08735668   | 9.018794494 | 1.022682494  | 0.332044746 | 0.332044746 | -5.155534663 |
| 1447979_at        | -0.073376904 | 5.661059107 | -1.022637829 | 0.332064797 | 0.332064797 | -5.155573873 |

|              |              |             |              |             |             |              |
|--------------|--------------|-------------|--------------|-------------|-------------|--------------|
| 1421835_at   | 0.073048174  | 5.938382731 | 1.022631462  | 0.332067656 | 0.332067656 | -5.155579463 |
| 1435287_at   | 0.065918638  | 4.074458666 | 1.022580289  | 0.33209063  | 0.33209063  | -5.155624384 |
| 1423024_at   | -0.072034599 | 5.262294836 | -1.022539373 | 0.332109001 | 0.332109001 | -5.1556603   |
| 1451378_at   | 0.070328547  | 7.812720126 | 1.022492168  | 0.332130196 | 0.332130196 | -5.155701736 |
| 1435951_at   | 0.104340328  | 6.079452748 | 1.022477297  | 0.332136873 | 0.332136873 | -5.155714788 |
| 1450303_at   | -0.080109764 | 3.794072521 | -1.022254304 | 0.332237012 | 0.332237012 | -5.155910504 |
| 1422636_at   | 0.074090998  | 9.640317976 | 1.022199781  | 0.3322615   | 0.3322615   | -5.155958351 |
| 1428487_s_at | 0.091401254  | 6.574412482 | 1.022189858  | 0.332265957 | 0.332265957 | -5.155967059 |
| 1434716_at   | 0.081605495  | 4.516640512 | 1.022164254  | 0.332277457 | 0.332277457 | -5.155989528 |
| 1416680_at   | 0.083579052  | 10.51305209 | 1.022146272  | 0.332285534 | 0.332285534 | -5.156005308 |
| 1433055_at   | -0.120568697 | 3.814312319 | -1.022120013 | 0.332297329 | 0.332297329 | -5.156028351 |
| 1453377_at   | -0.07944766  | 5.948179357 | -1.021914599 | 0.332389606 | 0.332389606 | -5.156208589 |
| 1440298_at   | -0.080735438 | 3.725482255 | -1.021900333 | 0.332396016 | 0.332396016 | -5.156221107 |
| 1434216_a_at | 0.157876811  | 8.366094367 | 1.021808359  | 0.33243734  | 0.33243734  | -5.156301798 |
| 1422449_s_at | -0.082469997 | 11.38766959 | -1.021772884 | 0.33245328  | 0.33245328  | -5.15633292  |
| 1430279_at   | 0.104868906  | 4.850905389 | 1.021764403  | 0.332457091 | 0.332457091 | -5.15634036  |
| 1445761_at   | 0.084654612  | 4.294794765 | 1.021676722  | 0.332496491 | 0.332496491 | -5.156417277 |
| 1434040_at   | 0.075893667  | 7.691745931 | 1.021673123  | 0.332498109 | 0.332498109 | -5.156420435 |
| 1421194_at   | 0.083537025  | 5.179403768 | 1.021545085  | 0.33255565  | 0.33255565  | -5.156532746 |
| 1420190_at   | -0.068552819 | 3.215430965 | -1.021484388 | 0.332582931 | 0.332582931 | -5.156585984 |
| 1431529_at   | -0.086267434 | 3.718819214 | -1.021466909 | 0.332590788 | 0.332590788 | -5.156601314 |
| 1457049_at   | 0.12715232   | 3.513798339 | 1.021365803  | 0.332636235 | 0.332636235 | -5.156689989 |
| 1446958_at   | -0.091227898 | 5.547929515 | -1.021343439 | 0.332646288 | 0.332646288 | -5.156709602 |
| 1454935_at   | -0.087309197 | 7.201638874 | -1.021272041 | 0.332678385 | 0.332678385 | -5.156772216 |
| 1445021_at   | 0.085888506  | 3.653068536 | 1.021116085  | 0.332748504 | 0.332748504 | -5.156908973 |
| 1444450_at   | -0.105837883 | 4.684269024 | -1.021099112 | 0.332756135 | 0.332756135 | -5.156923855 |
| 1444822_at   | 0.102264673  | 3.79517595  | 1.021017264  | 0.33279294  | 0.33279294  | -5.15699562  |
| 1420769_at   | -0.092871597 | 4.090407708 | -1.020973866 | 0.332812455 | 0.332812455 | -5.15703367  |
| 1423477_at   | -0.157741321 | 3.69221069  | -1.020862928 | 0.332862348 | 0.332862348 | -5.15713093  |
| 1431748_a_at | 0.078067195  | 4.335253567 | 1.020830368  | 0.332876992 | 0.332876992 | -5.157159475 |
| 1447063_at   | -0.090892053 | 4.70522107  | -1.020825379 | 0.332879236 | 0.332879236 | -5.157163848 |
| 1422676_at   | 0.092218894  | 10.31121124 | 1.020572961  | 0.332992781 | 0.332992781 | -5.15738511  |
| 1431516_at   | 0.092280022  | 3.802355486 | 1.02052609   | 0.333013868 | 0.333013868 | -5.157426191 |
| 1423849_a_at | -0.073058411 | 8.515115891 | -1.020482637 | 0.333033418 | 0.333033418 | -5.157464274 |
| 1428730_at   | 0.34342644   | 6.108018494 | 1.020431898  | 0.333056248 | 0.333056248 | -5.157508743 |
| 1457485_at   | -0.10251371  | 6.966298484 | -1.020427672 | 0.33305815  | 0.33305815  | -5.157512446 |
| 1428736_at   | -0.077833745 | 8.729942538 | -1.02040063  | 0.333070317 | 0.333070317 | -5.157536145 |
| 1456063_at   | -0.065266048 | 8.253151255 | -1.020365594 | 0.333086083 | 0.333086083 | -5.157566849 |
| 1438029_at   | 0.099280613  | 7.450571139 | 1.020306844  | 0.33311252  | 0.33311252  | -5.157618333 |
| 1458136_at   | -0.074887591 | 6.956530203 | -1.020299743 | 0.333115715 | 0.333115715 | -5.157624555 |
| 1448417_at   | -0.082851481 | 6.44752911  | -1.02019859  | 0.333161238 | 0.333161238 | -5.157713193 |
| 1418866_at   | -0.076291366 | 3.659392273 | -1.020195854 | 0.333162469 | 0.333162469 | -5.15771559  |
| 1423861_at   | 0.062674648  | 5.28084314  | 1.020178264  | 0.333170386 | 0.333170386 | -5.157731003 |
| 1429957_at   | -0.102710271 | 5.039635805 | -1.020164734 | 0.333176475 | 0.333176475 | -5.157742858 |
| 1448439_at   | -0.075598427 | 8.19318925  | -1.020106155 | 0.333202841 | 0.333202841 | -5.157794185 |
| 1459204_at   | 0.084704934  | 3.293103153 | 1.020015207  | 0.333243779 | 0.333243779 | -5.157873868 |
| 1445574_at   | -0.104479455 | 6.029012066 | -1.01998476  | 0.333257484 | 0.333257484 | -5.157900543 |
| 1441916_s_at | -0.08786211  | 3.480994412 | -1.019934567 | 0.333280079 | 0.333280079 | -5.157944515 |
| 1437905_at   | -0.074475012 | 3.045760532 | -1.019907113 | 0.333292439 | 0.333292439 | -5.157968567 |
| 1451325_at   | -0.078648243 | 6.109467845 | -1.019902443 | 0.333294541 | 0.333294541 | -5.157972658 |
| 1428027_at   | -0.073225426 | 3.525234313 | -1.019880646 | 0.333304354 | 0.333304354 | -5.157991753 |
| 1423167_at   | 0.078658925  | 10.30243515 | 1.019878891  | 0.333305145 | 0.333305145 | -5.15799329  |
| 1430361_at   | -0.103639178 | 3.792243252 | -1.019815949 | 0.333333482 | 0.333333482 | -5.158048427 |

|              |              |             |              |             |             |              |
|--------------|--------------|-------------|--------------|-------------|-------------|--------------|
| 1448224_at   | 0.075789917  | 9.040537366 | 1.019800698  | 0.333340349 | 0.333340349 | -5.158061787 |
| 1442301_at   | 0.093869719  | 3.997403529 | 1.019614276  | 0.333424291 | 0.333424291 | -5.158225075 |
| 1459604_at   | 0.084353963  | 3.603555508 | 1.019458741  | 0.333494338 | 0.333494338 | -5.158361292 |
| 1453822_at   | -0.088744343 | 4.899229537 | -1.01939059  | 0.333525035 | 0.333525035 | -5.158420973 |
| 1427336_at   | -0.086499121 | 5.093736613 | -1.019250288 | 0.333588235 | 0.333588235 | -5.158543829 |
| 1446851_at   | -0.088538342 | 6.081085073 | -1.019234244 | 0.333595463 | 0.333595463 | -5.158557877 |
| 1419879_s_at | 0.145451524  | 8.90396825  | 1.019223413  | 0.333600342 | 0.333600342 | -5.15856736  |
| 1457939_at   | 0.087038643  | 4.464650764 | 1.019200656  | 0.333610594 | 0.333610594 | -5.158587286 |
| 1454563_at   | 0.061770978  | 4.00871668  | 1.019160362  | 0.333628748 | 0.333628748 | -5.158622566 |
| 1430608_at   | 0.137574799  | 6.113829657 | 1.019157695  | 0.333629949 | 0.333629949 | -5.158624901 |
| 1448101_s_at | -0.129180988 | 9.757165999 | -1.019153302 | 0.333631929 | 0.333631929 | -5.158628747 |
| 1452733_at   | 0.07686004   | 8.553134907 | 1.01914193   | 0.333637052 | 0.333637052 | -5.158638704 |
| 1445362_at   | -0.068658063 | 5.640461807 | -1.019132556 | 0.333641275 | 0.333641275 | -5.158646911 |
| 1429114_at   | -0.081235718 | 7.644374933 | -1.019129087 | 0.333642838 | 0.333642838 | -5.158649948 |
| 1457979_at   | -0.083546912 | 3.384715112 | -1.019124964 | 0.333644696 | 0.333644696 | -5.158653558 |
| 1455827_at   | 0.062585128  | 10.28122725 | 1.019109542  | 0.333651644 | 0.333651644 | -5.15866706  |
| 1429244_at   | 0.086207228  | 7.930630988 | 1.019078311  | 0.333665716 | 0.333665716 | -5.158694403 |
| 1432741_at   | -0.083087283 | 3.304806612 | -1.018981953 | 0.333709134 | 0.333709134 | -5.15877876  |
| 1442500_at   | 0.072041377  | 3.459201039 | 1.018977084  | 0.333711329 | 0.333711329 | -5.158783023 |
| 1454009_at   | -0.076535667 | 4.222497661 | -1.018942006 | 0.333727136 | 0.333727136 | -5.158813731 |
| 1457094_at   | 0.08283587   | 7.333103633 | 1.018941961  | 0.333727156 | 0.333727156 | -5.15881377  |
| 1435527_at   | -0.113097347 | 10.40375842 | -1.018918035 | 0.333737938 | 0.333737938 | -5.158834715 |
| 1459699_at   | 0.082325112  | 4.000230757 | 1.018818182  | 0.333782938 | 0.333782938 | -5.158922121 |
| 1449757_x_at | -0.072148956 | 3.518059729 | -1.018717749 | 0.333828205 | 0.333828205 | -5.159010028 |
| 1429507_at   | -0.087393708 | 5.891149701 | -1.018714078 | 0.333829859 | 0.333829859 | -5.159013241 |
| 1444945_at   | 0.079958889  | 3.453653326 | 1.018642614  | 0.333862072 | 0.333862072 | -5.159075788 |
| 1447128_at   | -0.078508043 | 3.341456767 | -1.018563084 | 0.333897923 | 0.333897923 | -5.15914539  |
| 1453369_a_at | 0.068590818  | 8.773042223 | 1.018532078  | 0.333911901 | 0.333911901 | -5.159172525 |
| 1459158_at   | 0.117430641  | 3.65786584  | 1.018531437  | 0.33391219  | 0.33391219  | -5.159173086 |
| 1460610_at   | -0.117149469 | 7.47507329  | -1.018515684 | 0.333919292 | 0.333919292 | -5.159186872 |
| 1432732_at   | -0.08537966  | 4.746458034 | -1.018510096 | 0.333921811 | 0.333921811 | -5.159191762 |
| 1422190_at   | -0.116706553 | 4.72150364  | -1.01836728  | 0.333986202 | 0.333986202 | -5.159316735 |
| 1460586_at   | -0.100677974 | 8.583628081 | -1.01834303  | 0.333997136 | 0.333997136 | -5.159337954 |
| 1415855_at   | -0.089156802 | 8.891936745 | -1.018300556 | 0.334016289 | 0.334016289 | -5.159375119 |
| 1420937_at   | 0.125069487  | 8.555904005 | 1.018279543  | 0.334025764 | 0.334025764 | -5.159393504 |
| 1444284_at   | -0.111579809 | 4.203130152 | -1.018209527 | 0.334057338 | 0.334057338 | -5.159454764 |
| 1444361_at   | 0.09760529   | 4.86706362  | 1.018199838  | 0.334061707 | 0.334061707 | -5.15946324  |
| 1445138_at   | 0.087925354  | 4.246488973 | 1.018170505  | 0.334074936 | 0.334074936 | -5.159488904 |
| 1418147_at   | 0.159990803  | 5.814052614 | 1.017974687  | 0.334163256 | 0.334163256 | -5.15966021  |
| 1425507_at   | 0.081080704  | 8.9366204   | 1.017821065  | 0.334232557 | 0.334232557 | -5.159794584 |
| 1428524_at   | -0.107843023 | 7.114407991 | -1.017776111 | 0.334252838 | 0.334252838 | -5.159833902 |
| 1448480_at   | 0.063624708  | 9.527995995 | 1.017754737  | 0.334262481 | 0.334262481 | -5.159852596 |
| 1458569_at   | 0.08034844   | 3.704913572 | 1.017708733  | 0.334283238 | 0.334283238 | -5.159892831 |
| 1459507_at   | -0.071552067 | 3.630945043 | -1.017608688 | 0.33432838  | 0.33432838  | -5.159980325 |
| 1438258_at   | 0.129704696  | 7.094202759 | 1.017397017  | 0.334423905 | 0.334423905 | -5.160165419 |
| 1433819_s_at | 0.077806955  | 6.958501698 | 1.017374174  | 0.334434216 | 0.334434216 | -5.160185392 |
| 1453088_at   | -0.080171825 | 4.504199241 | -1.017357559 | 0.334441715 | 0.334441715 | -5.16019992  |
| 1444881_at   | -0.106357787 | 4.68680623  | -1.017336543 | 0.3344512   | 0.3344512   | -5.160218294 |
| 1441841_at   | 0.127842701  | 5.657146841 | 1.017329572  | 0.334454347 | 0.334454347 | -5.160224389 |
| 1426058_a_at | -0.096015684 | 4.355091524 | -1.017322293 | 0.334457633 | 0.334457633 | -5.160230754 |
| 1418667_at   | 0.075981876  | 8.054724023 | 1.017319478  | 0.334458903 | 0.334458903 | -5.160233215 |
| 1429137_at   | 0.081036333  | 6.069777474 | 1.017317784  | 0.334459668 | 0.334459668 | -5.160234696 |
| 1434887_at   | -0.079755675 | 8.524334475 | -1.017310675 | 0.334462877 | 0.334462877 | -5.160240911 |

|              |              |             |              |             |             |              |
|--------------|--------------|-------------|--------------|-------------|-------------|--------------|
| 1424497_at   | -0.063503941 | 7.194987217 | -1.017290768 | 0.334471862 | 0.334471862 | -5.160258316 |
| 1416813_at   | 0.064705663  | 9.772680885 | 1.017146289  | 0.334537083 | 0.334537083 | -5.160384627 |
| 1421443_at   | 0.067046674  | 3.292131118 | 1.017131677  | 0.33454368  | 0.33454368  | -5.160397402 |
| 1419403_at   | 0.097444245  | 7.440098203 | 1.016996131  | 0.334604878 | 0.334604878 | -5.160515888 |
| 1453619_at   | 0.095385307  | 4.854981572 | 1.016987031  | 0.334608987 | 0.334608987 | -5.160523843 |
| 1422293_a_at | 0.074174545  | 7.628743627 | 1.01696596   | 0.334618501 | 0.334618501 | -5.160542261 |
| 1448299_at   | 0.086534395  | 4.98350397  | 1.016904604  | 0.334646207 | 0.334646207 | -5.16059589  |
| 1437044_a_at | -0.131802636 | 8.036362479 | -1.016744071 | 0.334718704 | 0.334718704 | -5.160736195 |
| 1450428_at   | -0.096850336 | 3.417214737 | -1.016734946 | 0.334722825 | 0.334722825 | -5.160744169 |
| 1425528_at   | 0.076164167  | 11.98085335 | 1.016733556  | 0.334723453 | 0.334723453 | -5.160745384 |
| 1445015_at   | -0.106412028 | 4.324316932 | -1.016613645 | 0.334777613 | 0.334777613 | -5.160850173 |
| 1440643_at   | 0.077165916  | 6.693323519 | 1.01660402   | 0.334781961 | 0.334781961 | -5.160858584 |
| 1427268_at   | 0.070387501  | 3.147174984 | 1.016543887  | 0.334809124 | 0.334809124 | -5.16091113  |
| 1415944_at   | 0.07642826   | 8.264561722 | 1.016530499  | 0.334815172 | 0.334815172 | -5.160922828 |
| 1442594_at   | 0.066543163  | 6.254131453 | 1.016483393  | 0.334836452 | 0.334836452 | -5.160963988 |
| 1428151_x_at | -0.073134851 | 5.29503662  | -1.016405331 | 0.334871719 | 0.334871719 | -5.161032194 |
| 1438503_x_at | 0.091556017  | 9.936500439 | 1.016300926  | 0.334918891 | 0.334918891 | -5.16112341  |
| 1454679_at   | 0.06637448   | 8.874156253 | 1.016226152  | 0.334952678 | 0.334952678 | -5.161188734 |
| 1458335_x_at | 0.06871521   | 6.189512975 | 1.016213661  | 0.334958322 | 0.334958322 | -5.161199646 |
| 1429243_at   | 0.079982069  | 7.576133422 | 1.016213657  | 0.334958324 | 0.334958324 | -5.161199649 |
| 1424166_at   | 0.104859257  | 7.790176166 | 1.01616759   | 0.334979141 | 0.334979141 | -5.161239892 |
| 1427425_at   | -0.167037564 | 7.974458527 | -1.016109959 | 0.335005186 | 0.335005186 | -5.161290234 |
| 1444100_at   | -0.085580817 | 7.2834912   | -1.016042772 | 0.335035551 | 0.335035551 | -5.161348922 |
| 1425939_at   | -0.093895537 | 3.795868822 | -1.016042525 | 0.335035662 | 0.335035662 | -5.161349137 |
| 1438421_at   | -0.06699464  | 6.190434259 | -1.016022529 | 0.3350447   | 0.3350447   | -5.161366604 |
| 1444979_at   | 0.065813922  | 3.754840296 | 1.016017447  | 0.335046996 | 0.335046996 | -5.161371042 |
| 1445022_at   | 0.074210713  | 3.457127181 | 1.015884773  | 0.335106966 | 0.335106966 | -5.161486921 |
| 1418461_at   | 0.130490629  | 6.681961286 | 1.01584589   | 0.335124543 | 0.335124543 | -5.16152088  |
| 1419355_at   | 0.088692211  | 8.357078855 | 1.015832678  | 0.335130515 | 0.335130515 | -5.161532418 |
| 1450621_a_at | 0.182135905  | 11.22265995 | 1.015744262  | 0.335170486 | 0.335170486 | -5.161609632 |
| 1445985_at   | 0.07460346   | 4.233527701 | 1.015604459  | 0.335233695 | 0.335233695 | -5.161731711 |
| 1431757_s_at | -0.092281804 | 3.822843683 | -1.015586879 | 0.335241644 | 0.335241644 | -5.161747062 |
| 1433723_s_at | -0.08446643  | 10.5881146  | -1.015579958 | 0.335244773 | 0.335244773 | -5.161753104 |
| 1421829_at   | -0.088505596 | 5.303170837 | -1.015509766 | 0.335276513 | 0.335276513 | -5.161814392 |
| 1418541_at   | -0.063062215 | 5.030858879 | -1.015446723 | 0.335305022 | 0.335305022 | -5.161869434 |
| 1459952_at   | 0.089701556  | 4.681950557 | 1.015427205  | 0.335313849 | 0.335313849 | -5.161886475 |
| 1418707_at   | 0.082001845  | 6.167495405 | 1.015389488  | 0.335330907 | 0.335330907 | -5.161919403 |
| 1456917_at   | 0.070184256  | 6.901798015 | 1.01536277   | 0.335342991 | 0.335342991 | -5.16194273  |
| 1455299_at   | 0.146990583  | 6.614905952 | 1.015342047  | 0.335352363 | 0.335352363 | -5.161960821 |
| 1440634_at   | 0.08536111   | 8.816334785 | 1.015322654  | 0.335361134 | 0.335361134 | -5.16197775  |
| 1458502_at   | 0.113452852  | 5.891586539 | 1.015309696  | 0.335366995 | 0.335366995 | -5.161989063 |
| 1438032_at   | 0.079252105  | 6.967616648 | 1.015303071  | 0.335369991 | 0.335369991 | -5.161994846 |
| 1420833_at   | -0.139324997 | 6.182192996 | -1.015263287 | 0.335387986 | 0.335387986 | -5.162029576 |
| 1455290_at   | 0.093513576  | 4.996690698 | 1.015208064  | 0.335412965 | 0.335412965 | -5.162077782 |
| 1416379_at   | 0.080325994  | 7.993330965 | 1.015146275  | 0.335440916 | 0.335440916 | -5.162131718 |
| 1425963_at   | -0.108939216 | 3.675019198 | -1.015106932 | 0.335458714 | 0.335458714 | -5.162166058 |
| 1439014_at   | 0.076573049  | 7.35946595  | 1.015004664  | 0.335504981 | 0.335504981 | -5.162255319 |
| 1420966_at   | -0.099946528 | 6.093018658 | -1.014994542 | 0.335509561 | 0.335509561 | -5.162264154 |
| 1449202_at   | -0.112533374 | 7.795251108 | -1.014936958 | 0.335535615 | 0.335535615 | -5.16231441  |
| 1447657_s_at | -0.47352471  | 7.211169554 | -1.014923208 | 0.335541836 | 0.335541836 | -5.16232641  |
| 1434281_at   | 0.089190988  | 9.339648915 | 1.014871527  | 0.335565221 | 0.335565221 | -5.162371512 |
| 1452567_at   | 0.086680844  | 3.582381768 | 1.014779631  | 0.335606805 | 0.335606805 | -5.162451706 |
| 1418723_at   | -0.107148262 | 5.711208719 | -1.014756021 | 0.33561749  | 0.33561749  | -5.162472308 |

|              |              |             |              |             |             |              |
|--------------|--------------|-------------|--------------|-------------|-------------|--------------|
| 1458257_at   | 0.067815953  | 4.095468135 | 1.01474925   | 0.335620554 | 0.335620554 | -5.162478217 |
| 1429520_a_at | 0.113711391  | 5.910016972 | 1.014720996  | 0.335633341 | 0.335633341 | -5.162502871 |
| 1418735_at   | -0.115688683 | 6.853420872 | -1.014716696 | 0.335635287 | 0.335635287 | -5.162506623 |
| 1417702_a_at | 0.138291641  | 3.664105963 | 1.01462443   | 0.335677045 | 0.335677045 | -5.16258713  |
| 1425729_at   | -0.088260922 | 4.991174214 | -1.014588948 | 0.335693105 | 0.335693105 | -5.162618089 |
| 1451628_a_at | 0.081235807  | 8.074097108 | 1.014459711  | 0.335751605 | 0.335751605 | -5.162730843 |
| 1458188_at   | -0.157888789 | 5.276855801 | -1.014439276 | 0.335760856 | 0.335760856 | -5.162748671 |
| 1459057_at   | 0.17797021   | 4.273101809 | 1.014390294  | 0.33578303  | 0.33578303  | -5.162791401 |
| 1419621_at   | -0.133487999 | 5.983409533 | -1.014385519 | 0.335785192 | 0.335785192 | -5.162795567 |
| 1426904_s_at | 0.084397893  | 9.506327984 | 1.01437633   | 0.335789352 | 0.335789352 | -5.162803584 |
| 1435205_at   | -0.079145315 | 3.764595378 | -1.014363981 | 0.335794943 | 0.335794943 | -5.162814356 |
| 1432480_a_at | 0.112410632  | 5.23624516  | 1.014329873  | 0.335810385 | 0.335810385 | -5.16284411  |
| 1442288_at   | -0.16896045  | 7.574340131 | -1.014318038 | 0.335815743 | 0.335815743 | -5.162854434 |
| 1449688_at   | -0.085091863 | 6.359864513 | -1.014317021 | 0.335816203 | 0.335816203 | -5.162855321 |
| 1433562_s_at | 0.094619175  | 11.79652775 | 1.014300024  | 0.335823899 | 0.335823899 | -5.162870148 |
| 1441292_at   | 0.071619338  | 3.14864823  | 1.014165486  | 0.335884816 | 0.335884816 | -5.1629875   |
| 1446531_at   | 0.085309674  | 3.531596919 | 1.014159394  | 0.335887575 | 0.335887575 | -5.162992814 |
| 1449648_s_at | 0.090143174  | 9.540803007 | 1.014154079  | 0.335889982 | 0.335889982 | -5.16299745  |
| 1441227_at   | 0.093804129  | 5.87460108  | 1.013980538  | 0.335968572 | 0.335968572 | -5.163148804 |
| 1434408_at   | 0.15338931   | 6.186074417 | 1.013781026  | 0.336058941 | 0.336058941 | -5.163322784 |
| 1455100_at   | 0.08735669   | 3.062147608 | 1.013754249  | 0.336071071 | 0.336071071 | -5.163346132 |
| 1447817_at   | 0.11810378   | 3.718124233 | 1.013712406  | 0.336090027 | 0.336090027 | -5.163382616 |
| 1433794_at   | 0.086021262  | 9.616735529 | 1.013617274  | 0.336133126 | 0.336133126 | -5.16346556  |
| 1455813_at   | -0.089421996 | 3.127756653 | -1.013611146 | 0.336135903 | 0.336135903 | -5.163470903 |
| 1415746_at   | -0.110759448 | 9.473574568 | -1.013599928 | 0.336140985 | 0.336140985 | -5.163480683 |
| 1455689_at   | 0.078891595  | 7.029301587 | 1.013499563  | 0.336186461 | 0.336186461 | -5.163568182 |
| 1446598_at   | -0.096489014 | 7.672668575 | -1.013462889 | 0.336203079 | 0.336203079 | -5.163600154 |
| 1450966_at   | 0.078090115  | 8.733244121 | 1.013421803  | 0.336221697 | 0.336221697 | -5.163635969 |
| 1418415_at   | -0.089252901 | 3.853941324 | -1.013350297 | 0.336254102 | 0.336254102 | -5.163698302 |
| 1460254_at   | 0.094929031  | 6.639670309 | 1.013298691  | 0.33627749  | 0.33627749  | -5.163743284 |
| 1435799_at   | -0.072113455 | 7.06123332  | -1.013119532 | 0.336358696 | 0.336358696 | -5.163899436 |
| 1454751_at   | 0.081682978  | 8.488578644 | 1.013111946  | 0.336362134 | 0.336362134 | -5.163906047 |
| 1426139_a_at | 0.091269472  | 5.296762383 | 1.013058451  | 0.336386384 | 0.336386384 | -5.163952668 |
| 1427587_at   | 0.065417816  | 3.444694611 | 1.012819582  | 0.336494683 | 0.336494683 | -5.164160818 |
| 1444123_at   | 0.072855495  | 4.758009064 | 1.012813314  | 0.336497525 | 0.336497525 | -5.164166279 |
| 1454369_a_at | -0.130880184 | 6.462907185 | -1.012784335 | 0.336510666 | 0.336510666 | -5.164191529 |
| 1417773_at   | -0.085390831 | 9.322300037 | -1.012781525 | 0.33651194  | 0.33651194  | -5.164193977 |
| 1440865_at   | 0.08626351   | 4.975822407 | 1.012772052  | 0.336516235 | 0.336516235 | -5.164202231 |
| 1460203_at   | -0.077350637 | 8.46284843  | -1.012766766 | 0.336518632 | 0.336518632 | -5.164206837 |
| 1443933_at   | -0.0896211   | 3.458824457 | -1.012713972 | 0.336542573 | 0.336542573 | -5.164252835 |
| 1427643_at   | 0.082217869  | 5.896995841 | 1.012706576  | 0.336545927 | 0.336545927 | -5.164259278 |
| 1418850_at   | 0.072669253  | 9.692390739 | 1.012686461  | 0.336555049 | 0.336555049 | -5.164276804 |
| 1431189_a_at | 0.076272189  | 5.969737768 | 1.012658667  | 0.336567654 | 0.336567654 | -5.164301018 |
| 1419679_at   | -0.097219925 | 4.45153224  | -1.012424024 | 0.336674079 | 0.336674079 | -5.164505424 |
| 1438570_at   | 0.081145489  | 4.990055578 | 1.01240062   | 0.336684696 | 0.336684696 | -5.16452581  |
| 1420847_a_at | -0.074793907 | 9.61035564  | -1.01234505  | 0.336709905 | 0.336709905 | -5.164574212 |
| 1426405_at   | 0.094948145  | 3.787822298 | 1.012340662  | 0.336711895 | 0.336711895 | -5.164578034 |
| 1452021_a_at | -0.091422687 | 7.567198088 | -1.012252356 | 0.336751958 | 0.336751958 | -5.164654946 |
| 1446274_at   | -0.104711638 | 3.795283664 | -1.01222404  | 0.336764805 | 0.336764805 | -5.164679607 |
| 1459088_at   | -0.064945773 | 5.18141643  | -1.01217739  | 0.336785971 | 0.336785971 | -5.164720235 |
| 1417259_a_at | 0.076680549  | 10.29751731 | 1.012154369  | 0.336796416 | 0.336796416 | -5.164740283 |
| 1448437_a_at | -0.073698341 | 9.095744722 | -1.012083737 | 0.336828466 | 0.336828466 | -5.164801794 |
| 1415671_at   | -0.066998949 | 10.31786234 | -1.011905386 | 0.336909404 | 0.336909404 | -5.164957096 |

|              |              |             |              |             |             |              |
|--------------|--------------|-------------|--------------|-------------|-------------|--------------|
| 1422960_at   | 0.101429029  | 4.063580708 | 1.011749413  | 0.336980199 | 0.336980199 | -5.165092896 |
| 1459745_at   | -0.081445221 | 6.530094167 | -1.011651579 | 0.337024611 | 0.337024611 | -5.165178067 |
| 1417357_at   | 0.074398823  | 9.423199658 | 1.011620524  | 0.337038709 | 0.337038709 | -5.165205101 |
| 1446641_at   | 0.080163236  | 4.660365655 | 1.011589216  | 0.337052923 | 0.337052923 | -5.165232355 |
| 1439257_x_at | -0.108883988 | 11.88463684 | -1.011569793 | 0.337061741 | 0.337061741 | -5.165249263 |
| 1460075_x_at | 0.076972126  | 3.346231056 | 1.011537304  | 0.337076491 | 0.337076491 | -5.165277543 |
| 1433700_at   | 0.072642342  | 9.048484201 | 1.011485705  | 0.337099919 | 0.337099919 | -5.165322457 |
| 1444225_at   | -0.100349973 | 3.220500336 | -1.011470245 | 0.337106939 | 0.337106939 | -5.165335915 |
| 1441966_at   | 0.153977987  | 3.978013566 | 1.011459728  | 0.337111714 | 0.337111714 | -5.165345068 |
| 1456213_x_at | -0.06822419  | 8.579450502 | -1.011449043 | 0.337116566 | 0.337116566 | -5.165354369 |
| 1455039_a_at | 0.101366833  | 9.755814047 | 1.011374282  | 0.337150513 | 0.337150513 | -5.165419439 |
| 1446820_at   | -0.091393011 | 5.764886999 | -1.011187677 | 0.337235258 | 0.337235258 | -5.16558184  |
| 1445411_at   | -0.366851107 | 5.678167788 | -1.011136658 | 0.337258431 | 0.337258431 | -5.165626238 |
| 1436290_at   | 0.120932922  | 4.635550157 | 1.010711874  | 0.337451412 | 0.337451412 | -5.165995822 |
| 1419680_a_at | 0.077111113  | 7.524322577 | 1.010620946  | 0.337492732 | 0.337492732 | -5.166074919 |
| 1442882_at   | -0.112618879 | 3.83513412  | -1.010595427 | 0.337504329 | 0.337504329 | -5.166097116 |
| 1427403_at   | 0.07729134   | 3.44150973  | 1.010591501  | 0.337506114 | 0.337506114 | -5.166100532 |
| 1441905_x_at | 0.142246454  | 3.376441984 | 1.010583599  | 0.337509704 | 0.337509704 | -5.166107404 |
| 1460687_at   | -0.144120827 | 9.09964477  | -1.010491702 | 0.33755147  | 0.33755147  | -5.166187336 |
| 1425330_a_at | -0.06890567  | 8.182095458 | -1.010474782 | 0.33755916  | 0.33755916  | -5.166202053 |
| 1445260_at   | -0.087101733 | 7.918473229 | -1.010408975 | 0.337589071 | 0.337589071 | -5.166259287 |
| 1454071_at   | -0.064576051 | 3.962599559 | -1.01035739  | 0.337612519 | 0.337612519 | -5.16630415  |
| 1456351_at   | 0.128228009  | 6.881587621 | 1.01035707   | 0.337612665 | 0.337612665 | -5.166304429 |
| 1452563_a_at | 0.545152093  | 4.554706443 | 1.010258948  | 0.33765727  | 0.33765727  | -5.166389759 |
| 1446251_at   | -0.072930822 | 4.050603864 | -1.010257917 | 0.337657739 | 0.337657739 | -5.166390656 |
| 1435243_at   | -0.094965001 | 8.416466647 | -1.010200992 | 0.337683618 | 0.337683618 | -5.166440157 |
| 1456866_x_at | 0.082629463  | 3.549290698 | 1.010154367  | 0.337704816 | 0.337704816 | -5.1664807   |
| 1441201_at   | -0.065612489 | 3.173184199 | -1.010049342 | 0.337752569 | 0.337752569 | -5.16657202  |
| 1456241_a_at | -0.119921885 | 10.00672895 | -1.009860456 | 0.337838465 | 0.337838465 | -5.166736238 |
| 1441896_x_at | 0.121847568  | 4.251584414 | 1.009858467  | 0.337839369 | 0.337839369 | -5.166737967 |
| 1441498_at   | -0.094178838 | 9.090794823 | -1.009706416 | 0.337908526 | 0.337908526 | -5.166870144 |
| 1421994_a_at | -0.065500292 | 6.200472453 | -1.009696702 | 0.337912945 | 0.337912945 | -5.166878588 |
| 1440199_at   | -0.06810407  | 3.565510103 | -1.009610037 | 0.337952367 | 0.337952367 | -5.166953917 |
| 1450291_s_at | 0.105627685  | 3.541716111 | 1.00955698   | 0.337976504 | 0.337976504 | -5.167000032 |
| 1459848_x_at | 0.090206696  | 6.706405846 | 1.00949102   | 0.338006513 | 0.338006513 | -5.167057359 |
| 1453358_s_at | 0.096669917  | 7.220085597 | 1.009452735  | 0.338023931 | 0.338023931 | -5.167090631 |
| 1451049_at   | -0.084628695 | 10.66065589 | -1.009429067 | 0.3380347   | 0.3380347   | -5.167111201 |
| 1454366_at   | -0.102113772 | 4.839291666 | -1.009428274 | 0.338035061 | 0.338035061 | -5.16711189  |
| 1420032_at   | -0.113771507 | 3.857114212 | -1.009414575 | 0.338041293 | 0.338041293 | -5.167123795 |
| 1419543_a_at | 0.070648018  | 11.38315423 | 1.00933808   | 0.3380761   | 0.3380761   | -5.16719027  |
| 1452212_at   | -0.084490332 | 4.900189108 | -1.009331793 | 0.33807896  | 0.33807896  | -5.167195733 |
| 1430317_at   | 0.111043726  | 7.014647413 | 1.009327649  | 0.338080846 | 0.338080846 | -5.167199335 |
| 1444921_at   | 0.06813111   | 3.445623813 | 1.009229895  | 0.33812533  | 0.33812533  | -5.167284278 |
| 1431578_at   | -0.094623816 | 6.888659702 | -1.009217991 | 0.338130747 | 0.338130747 | -5.167294622 |
| 1453538_at   | 0.086036143  | 3.385524885 | 1.009204233  | 0.338137008 | 0.338137008 | -5.167306576 |
| 1426191_a_at | -0.121066089 | 5.978791312 | -1.009169984 | 0.338152595 | 0.338152595 | -5.167336335 |
| 1454614_at   | -0.080598174 | 7.989207522 | -1.009096272 | 0.338186143 | 0.338186143 | -5.16740038  |
| 1439137_at   | 0.092458142  | 4.354933483 | 1.009018825  | 0.338221394 | 0.338221394 | -5.167467666 |
| 1438526_at   | 0.079389914  | 3.361638761 | 1.009017661  | 0.338221924 | 0.338221924 | -5.167468678 |
| 1437105_at   | 0.094513748  | 8.855969167 | 1.008966644  | 0.338245146 | 0.338245146 | -5.167512999 |
| 1458301_x_at | 0.070007764  | 3.261993057 | 1.008966341  | 0.338245285 | 0.338245285 | -5.167513262 |
| 1445053_at   | 0.071891914  | 3.018938835 | 1.00891214   | 0.338269958 | 0.338269958 | -5.167560348 |
| 1428117_x_at | 0.08041739   | 8.216174782 | 1.008905085  | 0.338273169 | 0.338273169 | -5.167566477 |



|              |              |             |              |             |             |              |
|--------------|--------------|-------------|--------------|-------------|-------------|--------------|
| 1453693_at   | -0.105818979 | 3.944080543 | -1.008896206 | 0.338277211 | 0.338277211 | -5.16757419  |
| 1460068_at   | 0.091410599  | 3.987624999 | 1.008877733  | 0.338285621 | 0.338285621 | -5.167590237 |
| 1455173_at   | 0.068661626  | 8.280322353 | 1.008827693  | 0.338308402 | 0.338308402 | -5.167633705 |
| 1458239_at   | -0.084504942 | 3.686087919 | -1.008760081 | 0.338339184 | 0.338339184 | -5.167692435 |
| 1447009_at   | -0.091098471 | 4.076303897 | -1.008722672 | 0.338356217 | 0.338356217 | -5.167724928 |
| 1449885_at   | -0.07602845  | 7.326836313 | -1.008685055 | 0.338373345 | 0.338373345 | -5.167757601 |
| 1427234_at   | -0.075989087 | 8.278882603 | -1.00862164  | 0.33840222  | 0.33840222  | -5.167812679 |
| 1436223_at   | 0.168650485  | 7.057298167 | 1.008534424  | 0.338441937 | 0.338441937 | -5.167888425 |
| 1457018_at   | -0.145540921 | 3.757920609 | -1.008446724 | 0.338481877 | 0.338481877 | -5.167964586 |
| 1428346_at   | -0.068088225 | 8.832861319 | -1.008422347 | 0.33849298  | 0.33849298  | -5.167985755 |
| 1447625_at   | -0.080523734 | 8.889219105 | -1.008349397 | 0.338526206 | 0.338526206 | -5.168049101 |
| 1451641_at   | -0.072312597 | 8.373835911 | -1.008328158 | 0.33853588  | 0.33853588  | -5.168067543 |
| 1437039_at   | 0.078406746  | 8.57256663  | 1.008254113  | 0.338569609 | 0.338569609 | -5.168131836 |
| 1427314_at   | 0.064110525  | 10.8344643  | 1.008224846  | 0.338582941 | 0.338582941 | -5.168157247 |
| 1438677_at   | 0.117005504  | 8.129111141 | 1.008218138  | 0.338585997 | 0.338585997 | -5.168163071 |
| 1458725_at   | -0.098514374 | 3.541993015 | -1.008215158 | 0.338587354 | 0.338587354 | -5.168165658 |
| 1423318_at   | -0.072563018 | 6.721554411 | -1.008209251 | 0.338590045 | 0.338590045 | -5.168170787 |
| 1446697_at   | -0.072379264 | 5.186311366 | -1.008195408 | 0.338596351 | 0.338596351 | -5.168182806 |
| 1434589_x_at | -0.108615927 | 9.772415932 | -1.008129549 | 0.338626354 | 0.338626354 | -5.168239985 |
| 1429607_at   | 0.069416922  | 4.426505828 | 1.008098701  | 0.338640409 | 0.338640409 | -5.168266767 |
| 1428556_at   | -0.066286948 | 8.234719985 | -1.008084878 | 0.338646707 | 0.338646707 | -5.168278767 |
| 1421533_at   | 0.103901418  | 3.871330184 | 1.008046623  | 0.338664136 | 0.338664136 | -5.168311978 |
| 1459102_at   | 0.08910174   | 3.765291628 | 1.008042728  | 0.338665911 | 0.338665911 | -5.168315359 |
| 1437944_at   | 0.106946021  | 5.003810883 | 1.007982144  | 0.338693515 | 0.338693515 | -5.168367952 |
| 1440921_at   | -0.121851912 | 3.726147515 | -1.007817989 | 0.338768319 | 0.338768319 | -5.168510444 |
| 1444922_at   | 0.098351769  | 4.664284385 | 1.007652107  | 0.338843923 | 0.338843923 | -5.168654416 |
| 1444481_at   | 0.081789681  | 7.229131665 | 1.00764626   | 0.338846588 | 0.338846588 | -5.16865949  |
| 1426650_at   | -0.757171215 | 6.736819391 | -1.007552063 | 0.338889526 | 0.338889526 | -5.168741237 |
| 1418633_at   | 0.093283852  | 7.561517924 | 1.007543046  | 0.338893636 | 0.338893636 | -5.168749061 |
| 1430222_at   | -0.122493711 | 4.285393249 | -1.00749685  | 0.338914695 | 0.338914695 | -5.168789149 |
| 1449022_at   | -0.171515221 | 8.401458026 | -1.007357891 | 0.338978048 | 0.338978048 | -5.168909725 |
| 1449233_at   | -0.072078236 | 5.575744833 | -1.007335668 | 0.33898818  | 0.33898818  | -5.168929007 |
| 1450289_at   | -0.108509364 | 5.175296417 | -1.007319257 | 0.338995663 | 0.338995663 | -5.168943247 |
| 1429993_s_at | -0.120918469 | 3.739002999 | -1.007276525 | 0.339015147 | 0.339015147 | -5.168980322 |
| 1436897_at   | -0.098397075 | 8.462795372 | -1.007227031 | 0.339037716 | 0.339037716 | -5.169023262 |
| 1431348_at   | -0.114595429 | 3.537213611 | -1.007206107 | 0.339047257 | 0.339047257 | -5.169041416 |
| 1420489_at   | -0.073573607 | 10.30674493 | -1.007183483 | 0.339057574 | 0.339057574 | -5.169061043 |
| 1426672_at   | -0.0614954   | 7.756567454 | -1.007116098 | 0.339088304 | 0.339088304 | -5.169119501 |
| 1453885_at   | -0.09095175  | 5.161685901 | -1.007105512 | 0.339093132 | 0.339093132 | -5.169128685 |
| 1457934_at   | 0.113442953  | 6.154610883 | 1.007103787  | 0.339093919 | 0.339093919 | -5.169130181 |
| 1435627_x_at | 0.075887955  | 7.350475891 | 1.007103012  | 0.339094272 | 0.339094272 | -5.169130854 |
| 1430880_at   | -0.070349948 | 3.831278507 | -1.007065179 | 0.339111527 | 0.339111527 | -5.169163673 |
| 1434743_x_at | 0.090625889  | 7.267575374 | 1.00704458   | 0.339120922 | 0.339120922 | -5.169181542 |
| 1442174_at   | -0.07090923  | 7.89682376  | -1.006887609 | 0.339192519 | 0.339192519 | -5.169317699 |
| 1454495_at   | -0.098326005 | 4.258905792 | -1.00686041  | 0.339204926 | 0.339204926 | -5.16934129  |
| 1431898_at   | -0.070919021 | 4.264570843 | -1.00676239  | 0.339249642 | 0.339249642 | -5.169426302 |
| 1440850_at   | 0.101342411  | 6.999379698 | 1.006721063  | 0.339268496 | 0.339268496 | -5.169462144 |
| 1441995_at   | -0.085296381 | 7.982605889 | -1.006705082 | 0.339275787 | 0.339275787 | -5.169476002 |
| 1437169_at   | -0.102048644 | 3.985544881 | -1.006637585 | 0.339306583 | 0.339306583 | -5.169534537 |
| 1420304_x_at | -0.085568922 | 8.970218081 | -1.006543085 | 0.339349703 | 0.339349703 | -5.169616483 |
| 1439224_at   | 0.216429266  | 7.003508077 | 1.006537417  | 0.339352289 | 0.339352289 | -5.169621397 |
| 1434013_at   | -0.305251555 | 5.570081744 | -1.006484012 | 0.339376659 | 0.339376659 | -5.169667704 |
| 1437238_x_at | 0.081283484  | 8.524437289 | 1.006379085  | 0.339424544 | 0.339424544 | -5.16975868  |

|              |              |             |              |             |             |              |
|--------------|--------------|-------------|--------------|-------------|-------------|--------------|
| 1446720_at   | -0.099510553 | 8.428096482 | -1.006353013 | 0.339436443 | 0.339436443 | -5.169781285 |
| 1432330_at   | -0.065857846 | 3.325801549 | -1.006336019 | 0.3394442   | 0.3394442   | -5.169796019 |
| 1427024_at   | 0.08390301   | 5.983033638 | 1.006288164  | 0.339466041 | 0.339466041 | -5.169837507 |
| 1429268_at   | -0.076293669 | 6.969461526 | -1.006266283 | 0.339476029 | 0.339476029 | -5.169856477 |
| 1447763_at   | 0.101452273  | 3.399651584 | 1.006214708  | 0.33949957  | 0.33949957  | -5.169901188 |
| 1458206_at   | -0.088808085 | 4.137441487 | -1.006126261 | 0.339539945 | 0.339539945 | -5.16997786  |
| 1460595_at   | 0.098063621  | 6.93670047  | 1.006107319  | 0.339548592 | 0.339548592 | -5.169994279 |
| 1453131_at   | -0.071148819 | 3.782868569 | -1.00606729  | 0.339566866 | 0.339566866 | -5.170028977 |
| 1424137_at   | 0.083888937  | 5.132870365 | 1.006057885  | 0.33957116  | 0.33957116  | -5.170037129 |
| 1452548_x_at | 0.083259417  | 6.015539366 | 1.006015362  | 0.339590574 | 0.339590574 | -5.170073987 |
| 1443834_at   | 0.067730812  | 3.046357411 | 1.006001522  | 0.339596893 | 0.339596893 | -5.170085984 |
| 1440040_at   | 0.191791508  | 4.874586737 | 1.00597575   | 0.339608659 | 0.339608659 | -5.170108321 |
| 1437467_at   | -0.087008202 | 10.20761761 | -1.005948667 | 0.339621025 | 0.339621025 | -5.170131795 |
| 1429719_at   | -0.146829462 | 7.156074078 | -1.005933062 | 0.33962815  | 0.33962815  | -5.17014532  |
| 1426841_at   | 0.065347557  | 9.583635528 | 1.005922439  | 0.339633    | 0.339633    | -5.170154526 |
| 1429911_at   | -0.069098832 | 6.504517503 | -1.005751019 | 0.339711277 | 0.339711277 | -5.170303087 |
| 1447179_at   | 0.107359675  | 6.118968517 | 1.005678455  | 0.339744417 | 0.339744417 | -5.170365968 |
| 1455831_at   | 0.104325901  | 10.41449351 | 1.005656816  | 0.339754299 | 0.339754299 | -5.170384719 |
| 1427903_at   | -0.083236201 | 10.65869804 | -1.005556012 | 0.339800341 | 0.339800341 | -5.170472065 |
| 1447708_x_at | -0.078363778 | 8.131677315 | -1.005499692 | 0.339826067 | 0.339826067 | -5.170520862 |
| 1431490_at   | -0.098672747 | 3.57240377  | -1.005491444 | 0.339829835 | 0.339829835 | -5.170528009 |
| 1425379_at   | 0.110226367  | 5.046800308 | 1.005468923  | 0.339840122 | 0.339840122 | -5.170547521 |
| 1456575_at   | 0.107591394  | 3.323574593 | 1.005231835  | 0.339948438 | 0.339948438 | -5.170752915 |
| 1420438_at   | -0.089518138 | 3.290249547 | -1.005170699 | 0.339976373 | 0.339976373 | -5.170805872 |
| 1424038_a_at | -0.105995873 | 9.993857738 | -1.005161587 | 0.339980537 | 0.339980537 | -5.170813764 |
| 1435173_at   | 0.118274044  | 7.556060975 | 1.005108606  | 0.340004747 | 0.340004747 | -5.170859655 |
| 1450374_at   | 0.106096554  | 6.396583381 | 1.004903234  | 0.340098606 | 0.340098606 | -5.171037526 |
| 1432788_at   | 0.072924139  | 3.433504055 | 1.004900413  | 0.340099895 | 0.340099895 | -5.171039968 |
| 1427282_a_at | 0.060921657  | 7.798629714 | 1.004758996  | 0.340164537 | 0.340164537 | -5.171162431 |
| 1436361_at   | -0.356511297 | 7.449681532 | -1.004756182 | 0.340165823 | 0.340165823 | -5.171164868 |
| 1442800_x_at | 0.077324154  | 3.819225327 | 1.00466711   | 0.340206543 | 0.340206543 | -5.171241994 |
| 1415890_at   | 0.072175488  | 10.57929118 | 1.004650673  | 0.340214058 | 0.340214058 | -5.171256227 |
| 1428810_at   | 0.061069381  | 8.792960499 | 1.004648318  | 0.340215134 | 0.340215134 | -5.171258266 |
| 1420859_at   | 0.141362343  | 8.408049572 | 1.004626498  | 0.34022511  | 0.34022511  | -5.171277158 |
| 1456365_at   | -0.084986008 | 7.340337262 | -1.004624673 | 0.340225944 | 0.340225944 | -5.171278738 |
| 1441402_at   | -0.095737171 | 4.267031043 | -1.004430688 | 0.340314642 | 0.340314642 | -5.171446684 |
| 1448834_at   | -0.122775827 | 7.254606123 | -1.00437273  | 0.340341146 | 0.340341146 | -5.171496857 |
| 1437010_a_at | -0.097346906 | 3.569102267 | -1.004048324 | 0.340489524 | 0.340489524 | -5.171777648 |
| 1430286_s_at | -0.098713097 | 7.057954608 | -1.003965976 | 0.340527196 | 0.340527196 | -5.171848913 |
| 1437776_at   | 0.072632871  | 6.823867857 | 1.00394294   | 0.340537735 | 0.340537735 | -5.171868848 |
| 1418489_a_at | 0.143043718  | 5.13188409  | 1.003926482  | 0.340545265 | 0.340545265 | -5.17188309  |
| 1442955_at   | -0.089114268 | 5.157794575 | -1.00391781  | 0.340549233 | 0.340549233 | -5.171890595 |
| 1442697_at   | -0.097052558 | 5.737486396 | -1.003873191 | 0.340569647 | 0.340569647 | -5.171929205 |
| 1450365_at   | 0.078491771  | 5.410810701 | 1.003844498  | 0.340582775 | 0.340582775 | -5.171954034 |
| 1429743_at   | -0.071996093 | 3.504118473 | -1.003784741 | 0.340610118 | 0.340610118 | -5.172005741 |
| 1415846_a_at | -0.066135289 | 3.506210137 | -1.003738175 | 0.340631426 | 0.340631426 | -5.172046032 |
| 1424957_at   | -0.07744096  | 5.519208682 | -1.003734383 | 0.340633162 | 0.340633162 | -5.172049313 |
| 1436542_at   | -0.101740049 | 7.206374167 | -1.003723756 | 0.340638024 | 0.340638024 | -5.172058508 |
| 1446362_at   | 0.089021706  | 3.686403522 | 1.003664924  | 0.340664947 | 0.340664947 | -5.17210941  |
| 1423097_s_at | 0.094171715  | 9.653909739 | 1.003635348  | 0.340678482 | 0.340678482 | -5.172134998 |
| 1448327_at   | -0.519013761 | 7.463375081 | -1.003607795 | 0.340691092 | 0.340691092 | -5.172158836 |
| 1417802_at   | -0.111437337 | 4.508158893 | -1.003560378 | 0.340712793 | 0.340712793 | -5.172199858 |
| 1435912_at   | 0.069022399  | 8.571405133 | 1.003528521  | 0.340727374 | 0.340727374 | -5.172227417 |

|                    |              |             |              |             |             |              |
|--------------------|--------------|-------------|--------------|-------------|-------------|--------------|
| 1445040_at         | -0.086489277 | 4.116685685 | -1.00339836  | 0.340786952 | 0.340786952 | -5.172340013 |
| 1422131_at         | 0.090714524  | 5.490398575 | 1.00338847   | 0.340791479 | 0.340791479 | -5.172348568 |
| 1421446_at         | 0.083605934  | 4.352254879 | 1.003387967  | 0.34079171  | 0.34079171  | -5.172349003 |
| 1437889_x_at       | -0.080905762 | 11.33845805 | -1.003352202 | 0.340808082 | 0.340808082 | -5.172379939 |
| 1459928_at         | 0.163938918  | 5.784493387 | 1.003287936  | 0.340837502 | 0.340837502 | -5.172435526 |
| 1447272_s_at       | 0.076183447  | 5.749783365 | 1.003107545  | 0.340920094 | 0.340920094 | -5.172591542 |
| 1425233_at         | -0.070633137 | 3.995898656 | -1.003098764 | 0.340924115 | 0.340924115 | -5.172599135 |
| 1451709_at         | 0.081052302  | 3.839136482 | 1.003093376  | 0.340926582 | 0.340926582 | -5.172603795 |
| 1423151_at         | -0.062714342 | 9.593260862 | -1.003088618 | 0.340928761 | 0.340928761 | -5.17260791  |
| 1453346_at         | 0.083240848  | 4.067683866 | 1.003021753  | 0.340959379 | 0.340959379 | -5.172665733 |
| 1456036_x_at       | -0.151058379 | 9.515937613 | -1.002988456 | 0.340974627 | 0.340974627 | -5.172694526 |
| 1440496_at         | 0.094321476  | 3.85420554  | 1.002968152  | 0.340983925 | 0.340983925 | -5.172712083 |
| 1452325_at         | -0.103240448 | 6.037909111 | -1.002949393 | 0.340992516 | 0.340992516 | -5.172728305 |
| 1442845_at         | -0.100145934 | 8.030428281 | -1.002711931 | 0.341101278 | 0.341101278 | -5.17293362  |
| 1442823_at         | -0.076433108 | 5.569109904 | -1.002683354 | 0.341114368 | 0.341114368 | -5.172958326 |
| 1429239_a_at       | -0.074388064 | 8.164599002 | -1.002609822 | 0.341148054 | 0.341148054 | -5.173021895 |
| 1421996_at         | 0.083772716  | 7.456518052 | 1.002604245  | 0.341150609 | 0.341150609 | -5.173026716 |
| 1443249_at         | -0.14137953  | 5.363481264 | -1.002573908 | 0.341164507 | 0.341164507 | -5.173052941 |
| 1449258_at         | 0.067178963  | 9.008477469 | 1.002511082  | 0.34119329  | 0.34119329  | -5.17310725  |
| 1457635_s_at       | 0.201232086  | 6.729369211 | 1.002492676  | 0.341201723 | 0.341201723 | -5.17312316  |
| 1440752_at         | -0.067356034 | 3.987664554 | -1.002343402 | 0.341270122 | 0.341270122 | -5.173252185 |
| 1437791_s_at       | 0.302397226  | 5.150077338 | 1.002285165  | 0.341296809 | 0.341296809 | -5.173302517 |
| 1432483_at         | -0.108934456 | 5.904092053 | -1.002234505 | 0.341320026 | 0.341320026 | -5.1733463   |
| 1422396_s_at       | 0.073124996  | 3.541379578 | 1.002209812  | 0.341331342 | 0.341331342 | -5.17336764  |
| 1439846_at         | -0.131625295 | 7.246565173 | -1.002086426 | 0.341387894 | 0.341387894 | -5.173474266 |
| 1418375_at         | 0.086311069  | 8.419751129 | 1.002026466  | 0.341415378 | 0.341415378 | -5.173526077 |
| 1423034_at         | 0.074399241  | 9.708714479 | 1.00199763   | 0.341428596 | 0.341428596 | -5.173550994 |
| AFFX-r2-Ec-bioC-3_ | 0.107807227  | 9.689022409 | 1.001964125  | 0.341443955 | 0.341443955 | -5.173579944 |
| 1416640_at         | -0.152583747 | 6.932186924 | -1.001854023 | 0.34149443  | 0.34149443  | -5.173675073 |
| 1434506_at         | 0.082689954  | 8.595176216 | 1.001834042  | 0.341503591 | 0.341503591 | -5.173692336 |
| 1435940_at         | 0.231039044  | 6.600818101 | 1.001796838  | 0.341520648 | 0.341520648 | -5.173724478 |
| 1427391_a_at       | -0.145590998 | 9.09149835  | -1.001768874 | 0.34153347  | 0.34153347  | -5.173748637 |
| 1440677_at         | -0.064097009 | 4.144108093 | -1.001766971 | 0.341534342 | 0.341534342 | -5.173750281 |
| 1435859_x_at       | 0.087315262  | 10.91178729 | 1.001763789  | 0.341535801 | 0.341535801 | -5.17375303  |
| 1447563_at         | -0.088055405 | 4.908332604 | -1.001745471 | 0.3415442   | 0.3415442   | -5.173768855 |
| 1445549_at         | 0.085738153  | 4.590545277 | 1.00173302   | 0.341549909 | 0.341549909 | -5.173779611 |
| 1432594_at         | -0.074534389 | 3.818906495 | -1.001715039 | 0.341558154 | 0.341558154 | -5.173795144 |
| 1437752_at         | -0.082786591 | 3.654342387 | -1.001711123 | 0.34155995  | 0.34155995  | -5.173798527 |
| 1445054_at         | -0.119783838 | 4.307353128 | -1.001674808 | 0.341576601 | 0.341576601 | -5.173829898 |
| 1429576_at         | -0.083700966 | 3.78368057  | -1.001623522 | 0.341600119 | 0.341600119 | -5.173874201 |
| 1418545_at         | 0.092689526  | 8.802605938 | 1.001554044  | 0.341631981 | 0.341631981 | -5.173934214 |
| 1424903_at         | 1.234902472  | 4.849196131 | 1.001515146  | 0.34164982  | 0.34164982  | -5.173967813 |
| 1454868_at         | -0.066073272 | 6.855823383 | -1.001484522 | 0.341663865 | 0.341663865 | -5.173994264 |
| 1436327_a_at       | 0.12229201   | 5.607214729 | 1.001426922  | 0.341690283 | 0.341690283 | -5.174044013 |
| 1418865_at         | -0.130576083 | 6.935989175 | -1.001411561 | 0.341697329 | 0.341697329 | -5.17405728  |
| 1451753_at         | -0.115726074 | 6.837515995 | -1.001274883 | 0.341760023 | 0.341760023 | -5.174175318 |
| 1460361_at         | 0.080024521  | 8.94711446  | 1.00125812   | 0.341767713 | 0.341767713 | -5.174189794 |
| 1418993_s_at       | -0.064250307 | 3.837354603 | -1.001224923 | 0.341782942 | 0.341782942 | -5.174218462 |
| AFFX-BioDn-3_at    | 0.080627493  | 11.62700063 | 1.001077759  | 0.341850459 | 0.341850459 | -5.174345537 |
| 1415828_a_at       | -0.088406926 | 11.04458007 | -1.001026856 | 0.341873815 | 0.341873815 | -5.174389488 |
| 1457769_at         | 0.113995001  | 3.913099256 | 1.001013313  | 0.341880029 | 0.341880029 | -5.174401181 |
| 1437914_at         | -0.233467232 | 6.280131647 | -1.000989782 | 0.341890826 | 0.341890826 | -5.174421498 |
| 1434839_s_at       | -0.0703809   | 9.62962482  | -1.000933291 | 0.341916749 | 0.341916749 | -5.17447027  |

|              |              |             |              |             |             |              |
|--------------|--------------|-------------|--------------|-------------|-------------|--------------|
| 1419531_at   | -0.069356002 | 3.936887757 | -1.000899248 | 0.341932371 | 0.341932371 | -5.174499661 |
| 1423420_at   | -0.088067574 | 4.673722382 | -1.000877144 | 0.341942515 | 0.341942515 | -5.174518744 |
| 1424962_at   | -0.083695762 | 4.657716108 | -1.000872734 | 0.341944539 | 0.341944539 | -5.174522551 |
| 1441339_at   | -0.100243809 | 4.58682062  | -1.0008583   | 0.341951163 | 0.341951163 | -5.174535012 |
| 1454276_at   | -0.092389006 | 3.948927869 | -1.0008387   | 0.341960157 | 0.341960157 | -5.174551932 |
| 1417081_a_at | 0.063840567  | 7.979067656 | 1.000827699  | 0.341965206 | 0.341965206 | -5.174561429 |
| 1439532_s_at | 0.085802228  | 6.381676108 | 1.000821007  | 0.341968277 | 0.341968277 | -5.174567206 |
| 1440220_at   | 0.115664759  | 5.848821171 | 1.000772499  | 0.34199054  | 0.34199054  | -5.174609081 |
| 1452614_at   | -0.08298878  | 4.194612727 | -1.000744504 | 0.342003389 | 0.342003389 | -5.174633247 |
| 1457062_at   | 0.06544191   | 7.745447255 | 1.000727794  | 0.342011059 | 0.342011059 | -5.174647671 |
| 1416883_at   | -0.093130288 | 9.772565679 | -1.000694589 | 0.3420263   | 0.3420263   | -5.174676334 |
| 1425132_at   | -0.065936557 | 5.518215324 | -1.000688381 | 0.342029149 | 0.342029149 | -5.174681692 |
| 1450647_at   | 0.086223282  | 7.497124832 | 1.000673737  | 0.342035871 | 0.342035871 | -5.174694333 |
| 1433604_x_at | -0.124768112 | 10.09738309 | -1.000619464 | 0.342060783 | 0.342060783 | -5.174741178 |
| 1422099_a_at | -0.092251802 | 4.211612185 | -1.000580105 | 0.34207885  | 0.34207885  | -5.17477515  |
| 1446055_at   | -0.078363505 | 5.221595931 | -1.000567251 | 0.342084751 | 0.342084751 | -5.174786245 |
| 1432167_at   | -0.113562989 | 4.084920215 | -1.000496601 | 0.342117185 | 0.342117185 | -5.174847221 |
| 1451489_at   | -0.072514195 | 5.320440613 | -1.000492566 | 0.342119037 | 0.342119037 | -5.174850703 |
| 1455110_at   | 0.066035528  | 9.408470297 | 1.000483704  | 0.342123106 | 0.342123106 | -5.174858352 |
| 1434587_x_at | -0.083020643 | 9.160400356 | -1.000440573 | 0.342142907 | 0.342142907 | -5.174895576 |
| 1447237_at   | 0.076039382  | 4.264183756 | 1.000413995  | 0.342155109 | 0.342155109 | -5.174918512 |
| 1431353_at   | 0.140911338  | 7.935498693 | 1.000401868  | 0.342160677 | 0.342160677 | -5.174928978 |
| 1459820_at   | 0.079398173  | 3.543686428 | 1.000360805  | 0.342179531 | 0.342179531 | -5.174964414 |
| 1427379_at   | 0.119998383  | 6.754717095 | 1.000232094  | 0.342238633 | 0.342238633 | -5.175075481 |
| 1451129_at   | -0.094530309 | 5.520546054 | -1.000221416 | 0.342243536 | 0.342243536 | -5.175084695 |
| 1459950_at   | 0.105871692  | 5.149620623 | 1.000217134  | 0.342245503 | 0.342245503 | -5.17508839  |
| 1456839_at   | -0.072835167 | 4.938674907 | -1.000216946 | 0.342245589 | 0.342245589 | -5.175088552 |
| 1425408_a_at | -0.082530811 | 3.421523683 | -1.00013906  | 0.342281357 | 0.342281357 | -5.175155755 |
| 1458393_at   | -0.090240171 | 7.273183428 | -1.000106469 | 0.342296325 | 0.342296325 | -5.175183875 |
| 1422901_at   | -0.089344926 | 9.540244912 | -1.000102682 | 0.342298064 | 0.342298064 | -5.175187142 |
| 1424229_at   | -0.139394135 | 6.658767582 | -1.00009926  | 0.342299636 | 0.342299636 | -5.175190094 |
| 1419998_at   | 0.105220426  | 3.790690691 | 1.000086474  | 0.342305508 | 0.342305508 | -5.175201126 |
| 1416800_at   | -0.096863949 | 9.182481952 | -1.000037193 | 0.342328142 | 0.342328142 | -5.175243644 |
| 1422539_at   | -0.080919346 | 8.200106233 | -1.000023956 | 0.342334222 | 0.342334222 | -5.175255064 |
| 1453102_at   | 0.067364508  | 8.866203975 | 0.999970647  | 0.342358708 | 0.342358708 | -5.175301055 |
| 1434576_at   | -0.100785667 | 8.158773195 | -0.999942633 | 0.342371576 | 0.342371576 | -5.175325222 |
| 1421323_a_at | 0.078451578  | 10.82143843 | 0.999907372  | 0.342387773 | 0.342387773 | -5.175355641 |
| 1425481_at   | -0.08821518  | 7.530365977 | -0.999883948 | 0.342398533 | 0.342398533 | -5.175375847 |
| 1438137_at   | 0.170703869  | 5.461119791 | 0.999874567  | 0.342402842 | 0.342402842 | -5.17538394  |
| 1431191_a_at | -0.126743393 | 4.356361329 | -0.999870408 | 0.342404753 | 0.342404753 | -5.175387527 |
| 1437280_s_at | 0.06893146   | 12.77284148 | 0.999794437  | 0.342439654 | 0.342439654 | -5.17545306  |
| 1432255_at   | 0.093305581  | 4.596631078 | 0.999753357  | 0.342458526 | 0.342458526 | -5.175488494 |
| 1427954_at   | 0.075277797  | 4.599826602 | 0.999685313  | 0.342489789 | 0.342489789 | -5.175547184 |
| 1444208_at   | -0.091518476 | 5.031649186 | -0.999632298 | 0.342514148 | 0.342514148 | -5.175592909 |
| 1433011_at   | -0.085599841 | 3.748403635 | -0.999623559 | 0.342518163 | 0.342518163 | -5.175600446 |
| 1431734_a_at | -0.076694538 | 7.434392099 | -0.999588553 | 0.342534249 | 0.342534249 | -5.175630637 |
| 1449464_at   | 0.075240581  | 5.35081208  | 0.999587585  | 0.342534693 | 0.342534693 | -5.175631472 |
| 1458117_at   | 0.088363556  | 3.594269961 | 0.999585337  | 0.342535727 | 0.342535727 | -5.175633411 |
| 1418312_at   | -0.096846442 | 7.497142323 | -0.999421549 | 0.342610994 | 0.342610994 | -5.175774659 |
| 1456345_at   | -0.127729872 | 4.368972186 | -0.999388941 | 0.342625981 | 0.342625981 | -5.175802777 |
| 1456984_at   | -0.074429    | 7.916342774 | -0.999367454 | 0.342635856 | 0.342635856 | -5.175821305 |
| 1424465_at   | 0.064796179  | 8.586909087 | 0.999325474  | 0.342655151 | 0.342655151 | -5.175857504 |
| 1439619_at   | 0.141114507  | 6.14507057  | 0.999220029  | 0.342703619 | 0.342703619 | -5.175948422 |

|              |              |             |              |             |             |              |
|--------------|--------------|-------------|--------------|-------------|-------------|--------------|
| 1428718_at   | 0.108270318  | 6.097830566 | 0.999002058  | 0.342803826 | 0.342803826 | -5.176136339 |
| 1420948_s_at | 0.069770806  | 7.75572413  | 0.998937829  | 0.342833358 | 0.342833358 | -5.176191706 |
| 1416514_a_at | 0.098217151  | 12.19723182 | 0.998936229  | 0.342834093 | 0.342834093 | -5.176193085 |
| 1431756_at   | 0.092977399  | 4.668347556 | 0.998883294  | 0.342858434 | 0.342858434 | -5.176238714 |
| 1453447_at   | -0.084341718 | 4.506322166 | -0.998830856 | 0.342882547 | 0.342882547 | -5.176283913 |
| 1432778_at   | -0.076868617 | 3.934240416 | -0.998768926 | 0.342911027 | 0.342911027 | -5.176337291 |
| 1455979_at   | -0.069205506 | 8.957275102 | -0.998671377 | 0.34295589  | 0.34295589  | -5.176421364 |
| 1453537_a_at | 0.095749146  | 4.110004112 | 0.998637519  | 0.342971462 | 0.342971462 | -5.176450543 |
| 1459018_at   | 0.088017335  | 3.283376844 | 0.998612808  | 0.342982828 | 0.342982828 | -5.176471839 |
| 1435974_at   | 0.127964532  | 5.175312433 | 0.998594669  | 0.342991171 | 0.342991171 | -5.176487471 |
| 1428235_at   | -0.085814081 | 10.51029667 | -0.998571789 | 0.343001696 | 0.343001696 | -5.176507188 |
| 1429526_at   | -0.08816511  | 7.448662933 | -0.99856275  | 0.343005853 | 0.343005853 | -5.176514977 |
| 1443159_at   | 0.103072649  | 6.702520301 | 0.998560066  | 0.343007088 | 0.343007088 | -5.17651729  |
| 1460323_at   | 0.070569808  | 9.296140176 | 0.998551637  | 0.343010965 | 0.343010965 | -5.176524554 |
| 1437385_at   | -0.10028407  | 6.199413662 | -0.998550184 | 0.343011633 | 0.343011633 | -5.176525806 |
| 1419035_s_at | 0.083580498  | 5.081594244 | 0.998546234  | 0.34301345  | 0.34301345  | -5.17652921  |
| 1423100_at   | 0.07979416   | 7.431492301 | 0.998425169  | 0.343069141 | 0.343069141 | -5.176633531 |
| 1451982_at   | -0.064151629 | 8.767713815 | -0.998382415 | 0.34308881  | 0.34308881  | -5.17667037  |
| 1444542_at   | -0.073549967 | 4.798901341 | -0.998380806 | 0.343089551 | 0.343089551 | -5.176671756 |
| 1427059_at   | -0.132396337 | 7.955565092 | -0.998372733 | 0.343093265 | 0.343093265 | -5.176678712 |
| 1430810_at   | -0.076725061 | 4.036598897 | -0.998372059 | 0.343093575 | 0.343093575 | -5.176679293 |
| 1436364_x_at | -0.066997926 | 10.94759436 | -0.99836419  | 0.343097195 | 0.343097195 | -5.176686073 |
| 1417296_at   | 0.070586799  | 9.177805975 | 0.99834286   | 0.343107009 | 0.343107009 | -5.176704451 |
| 1424675_at   | 0.105150985  | 8.331537528 | 0.998288597  | 0.343131974 | 0.343131974 | -5.176751203 |
| 1427405_s_at | -0.100192581 | 6.707960081 | -0.998168739 | 0.343187125 | 0.343187125 | -5.176854464 |
| 1429309_at   | -0.093062013 | 5.45898413  | -0.998146866 | 0.34319719  | 0.34319719  | -5.176873307 |
| 1430564_at   | -0.098574679 | 4.462604989 | -0.998136868 | 0.343201791 | 0.343201791 | -5.17688192  |
| 1426644_at   | -0.099856029 | 8.949587635 | -0.998100984 | 0.343218304 | 0.343218304 | -5.176912832 |
| 1432950_at   | 0.092195551  | 3.664814801 | 0.998095322  | 0.343220909 | 0.343220909 | -5.176917709 |
| 1449900_at   | -0.084220754 | 3.446316409 | -0.998072212 | 0.343231545 | 0.343231545 | -5.176937617 |
| 1433736_at   | -0.079007522 | 10.23366599 | -0.998004267 | 0.343262814 | 0.343262814 | -5.176996144 |
| 1421330_at   | -0.071572611 | 4.451847612 | -0.997956939 | 0.343284597 | 0.343284597 | -5.177036911 |
| 1440651_at   | -0.197739367 | 5.361525477 | -0.997954853 | 0.343285557 | 0.343285557 | -5.177038708 |
| 1429536_at   | 0.081635068  | 4.569071384 | 0.997954039  | 0.343285931 | 0.343285931 | -5.177039408 |
| 1450544_at   | 0.090749171  | 5.490010944 | 0.997895509  | 0.343312871 | 0.343312871 | -5.177089822 |
| 1418992_at   | -0.088882146 | 3.438553211 | -0.997840819 | 0.343338045 | 0.343338045 | -5.177136925 |
| 1442905_at   | 0.094474585  | 6.331304177 | 0.997838801  | 0.343338973 | 0.343338973 | -5.177138663 |
| 1441428_at   | -0.076199748 | 3.221046674 | -0.997830756 | 0.343342677 | 0.343342677 | -5.177145592 |
| 1450473_at   | -0.136117133 | 5.450921478 | -0.997794434 | 0.343359397 | 0.343359397 | -5.177176874 |
| 1449520_at   | -0.120416765 | 8.145186132 | -0.99777659  | 0.343367611 | 0.343367611 | -5.177192242 |
| 1459299_at   | -0.072257963 | 3.726692837 | -0.997763903 | 0.343373451 | 0.343373451 | -5.177203168 |
| 1457134_at   | 0.089732831  | 4.188073915 | 0.997756065  | 0.343377059 | 0.343377059 | -5.177209918 |
| 1436064_x_at | 0.064816467  | 13.21081212 | 0.99761375   | 0.343442578 | 0.343442578 | -5.177332473 |
| 1449354_at   | -0.067912232 | 7.923723772 | -0.997533081 | 0.343479721 | 0.343479721 | -5.177401937 |
| 1425376_at   | -0.085775393 | 3.922007471 | -0.997483218 | 0.343502681 | 0.343502681 | -5.17744487  |
| 1439205_at   | 0.079532988  | 6.533986297 | 0.997479841  | 0.343504236 | 0.343504236 | -5.177447778 |
| 1453484_at   | -0.127669804 | 4.041059069 | -0.997463092 | 0.343511949 | 0.343511949 | -5.177462199 |
| 1436265_at   | 0.077485391  | 3.815334244 | 0.997460955  | 0.343512933 | 0.343512933 | -5.177464039 |
| 1449569_at   | -0.102731571 | 4.732528847 | -0.997454119 | 0.34351608  | 0.34351608  | -5.177469924 |
| 1457367_at   | 0.132912748  | 6.999653694 | 0.997374293  | 0.343552841 | 0.343552841 | -5.177538653 |
| 1424205_at   | -0.081366486 | 8.725725839 | -0.997242684 | 0.343613454 | 0.343613454 | -5.177651956 |
| 1439190_at   | -0.081262929 | 4.622972861 | -0.997229384 | 0.343619579 | 0.343619579 | -5.177663404 |
| 1419712_at   | 0.083435296  | 5.411064708 | 0.997191611  | 0.343636978 | 0.343636978 | -5.177695921 |

|              |              |             |              |             |             |              |
|--------------|--------------|-------------|--------------|-------------|-------------|--------------|
| 1431220_at   | -0.067818339 | 5.798948877 | -0.997130685 | 0.343665042 | 0.343665042 | -5.177748367 |
| 1420313_x_at | 0.124542961  | 3.450417178 | 0.997127358  | 0.343666574 | 0.343666574 | -5.17775123  |
| 1448369_at   | 0.115225539  | 8.304663725 | 0.99711252   | 0.343673409 | 0.343673409 | -5.177764002 |
| 1443207_at   | 0.094834785  | 4.022205069 | 0.997050961  | 0.343701767 | 0.343701767 | -5.177816989 |
| 1428671_at   | 0.126522458  | 5.056896131 | 0.997050084  | 0.343702171 | 0.343702171 | -5.177817744 |
| 1433810_x_at | -0.068241665 | 7.106796076 | -0.997012074 | 0.343719681 | 0.343719681 | -5.17785046  |
| 1442834_at   | -0.123077107 | 6.684108494 | -0.99696818  | 0.343739903 | 0.343739903 | -5.177888238 |
| 1460436_at   | 0.085151644  | 10.12384289 | 0.996955881  | 0.343745569 | 0.343745569 | -5.177898824 |
| 1428535_at   | 0.067194675  | 8.551071914 | 0.996923283  | 0.343760588 | 0.343760588 | -5.177926879 |
| 1437601_at   | -0.099114172 | 5.069764412 | -0.996882482 | 0.343779387 | 0.343779387 | -5.177961994 |
| 1443623_a_at | -0.09340728  | 3.752964435 | -0.996830137 | 0.343803505 | 0.343803505 | -5.178007042 |
| 1431985_at   | 0.080717511  | 6.887991035 | 0.996809296  | 0.343813108 | 0.343813108 | -5.178024977 |
| 1459368_at   | -0.069279771 | 4.079163302 | -0.996718443 | 0.343854974 | 0.343854974 | -5.178103159 |
| 1459295_at   | -0.136268613 | 5.072976615 | -0.996712817 | 0.343857567 | 0.343857567 | -5.178108001 |
| 1457648_x_at | -0.101972998 | 3.611745865 | -0.996683718 | 0.343870976 | 0.343870976 | -5.17813304  |
| 1447077_at   | 0.124752206  | 5.05589228  | 0.996645638  | 0.343888525 | 0.343888525 | -5.178165807 |
| 1437847_x_at | 0.061544601  | 3.531874645 | 0.996607577  | 0.343906067 | 0.343906067 | -5.178198556 |
| 1431336_at   | -0.097218339 | 4.818776767 | -0.996459703 | 0.343974223 | 0.343974223 | -5.178325784 |
| 1440222_at   | 0.104853302  | 6.758342981 | 0.996388413  | 0.344007085 | 0.344007085 | -5.178387115 |
| 1438046_at   | -0.117261776 | 7.546693606 | -0.996388114 | 0.344007223 | 0.344007223 | -5.178387372 |
| 1439702_at   | -0.095147532 | 3.654185788 | -0.996294425 | 0.344050413 | 0.344050413 | -5.178467968 |
| 1439808_at   | -0.1369844   | 4.816958364 | -0.996172841 | 0.344106469 | 0.344106469 | -5.178572551 |
| 1452142_at   | 0.082767798  | 3.194429939 | 0.996170148  | 0.344107711 | 0.344107711 | -5.178574868 |
| 1421071_at   | -0.095057381 | 7.440814477 | -0.996140451 | 0.344121404 | 0.344121404 | -5.178600411 |
| 1457385_at   | -0.072103153 | 5.248287926 | -0.996136746 | 0.344123112 | 0.344123112 | -5.178603598 |
| 1449146_at   | 0.112379951  | 6.707138382 | 0.996022741  | 0.344175682 | 0.344175682 | -5.17870165  |
| 1440007_at   | 0.083052019  | 6.893162198 | 0.996006124  | 0.344183345 | 0.344183345 | -5.178715941 |
| 1451539_at   | -0.097370417 | 6.545150394 | -0.995991239 | 0.344190209 | 0.344190209 | -5.178728743 |
| 1455682_at   | 0.074550393  | 8.063097427 | 0.995949323  | 0.344209539 | 0.344209539 | -5.17876479  |
| 1450682_at   | -0.067724631 | 3.403154704 | -0.995929911 | 0.344218492 | 0.344218492 | -5.178781485 |
| 1450002_at   | 0.07888619   | 5.232918163 | 0.995911653  | 0.344226913 | 0.344226913 | -5.178797186 |
| 1426561_a_at | -0.126033638 | 6.914587045 | -0.995820047 | 0.344269163 | 0.344269163 | -5.17887596  |
| 1418034_at   | 0.065176604  | 7.423697231 | 0.995783402  | 0.344286065 | 0.344286065 | -5.17890747  |
| 1434002_at   | 0.080883733  | 8.676520791 | 0.995758283  | 0.344297652 | 0.344297652 | -5.17892907  |
| 1419654_at   | -0.123518502 | 6.141369127 | -0.995630394 | 0.344356646 | 0.344356646 | -5.17903903  |
| 1424929_a_at | -0.079536549 | 8.161569638 | -0.995552329 | 0.344392661 | 0.344392661 | -5.179106146 |
| 1456891_at   | 0.115537114  | 6.787072445 | 0.995534222  | 0.344401015 | 0.344401015 | -5.179121713 |
| 1425380_at   | -0.088733465 | 5.059002371 | -0.99546088  | 0.344434854 | 0.344434854 | -5.179184763 |
| 1446808_at   | 0.066175127  | 4.036388683 | 0.995408552  | 0.344458999 | 0.344458999 | -5.179229746 |
| 1438888_at   | -0.070855557 | 5.480077734 | -0.995392428 | 0.344466438 | 0.344466438 | -5.179243606 |
| 1449329_at   | 0.105711829  | 7.452655013 | 0.995315685  | 0.344501852 | 0.344501852 | -5.179309573 |
| 1429143_at   | -0.083979117 | 4.000052893 | -0.995303254 | 0.344507588 | 0.344507588 | -5.179320258 |
| 1433799_at   | 0.09339667   | 7.135001407 | 0.99524768   | 0.344533235 | 0.344533235 | -5.179368026 |
| 1417508_at   | 0.090720519  | 9.108348755 | 0.99522202   | 0.344545077 | 0.344545077 | -5.17939008  |
| 1431012_a_at | 0.060104564  | 9.99122295  | 0.995216746  | 0.344547512 | 0.344547512 | -5.179394614 |
| 1451901_at   | 0.09159975   | 5.59854971  | 0.995178912  | 0.344564973 | 0.344564973 | -5.179427131 |
| 1436435_at   | -0.079229125 | 4.057941269 | -0.99513608  | 0.344584741 | 0.344584741 | -5.179463943 |
| 1451403_at   | 0.093085419  | 8.306355365 | 0.995133114  | 0.34458611  | 0.34458611  | -5.179466492 |
| 1424095_at   | 0.084677579  | 9.521746277 | 0.995087475  | 0.344607176 | 0.344607176 | -5.179505715 |
| 1428449_at   | 0.085825002  | 7.356100859 | 0.994864321  | 0.34471019  | 0.34471019  | -5.179697477 |
| 1428298_at   | -0.109748165 | 6.654856705 | -0.994852284 | 0.344715746 | 0.344715746 | -5.179707819 |
| 1460703_at   | -0.078503812 | 7.881951373 | -0.994792285 | 0.344743448 | 0.344743448 | -5.179759372 |
| 1441875_at   | -0.126464094 | 3.803496557 | -0.994750768 | 0.344762617 | 0.344762617 | -5.179795043 |

|              |              |             |              |             |             |              |
|--------------|--------------|-------------|--------------|-------------|-------------|--------------|
| 1439040_at   | 0.249089364  | 7.628932446 | 0.994750337  | 0.344762816 | 0.344762816 | -5.179795413 |
| 1437129_at   | 0.094516059  | 8.289211702 | 0.994694727  | 0.344788494 | 0.344788494 | -5.179843191 |
| 1460548_a_at | -0.060211147 | 8.40486497  | -0.994676007 | 0.344797138 | 0.344797138 | -5.179859274 |
| 1453560_at   | -0.098349977 | 4.989757684 | -0.994671389 | 0.34479927  | 0.34479927  | -5.179863241 |
| 1423894_a_at | -0.065469508 | 8.152041451 | -0.994662867 | 0.344803205 | 0.344803205 | -5.179870563 |
| 1446954_at   | -0.123542982 | 5.185495567 | -0.994616036 | 0.344824831 | 0.344824831 | -5.179910795 |
| 1442121_at   | -0.195502497 | 4.294924948 | -0.994594529 | 0.344834763 | 0.344834763 | -5.179929271 |
| 1430951_at   | -0.073168456 | 4.194281178 | -0.99442492  | 0.344913095 | 0.344913095 | -5.180074967 |
| 1421791_at   | 0.089086532  | 3.645354334 | 0.994408791  | 0.344920545 | 0.344920545 | -5.180088821 |
| 1436980_x_at | 0.094601849  | 9.313485218 | 0.994404695  | 0.344922437 | 0.344922437 | -5.180092339 |
| 1440348_at   | 0.096592375  | 7.451623071 | 0.994252876  | 0.344992565 | 0.344992565 | -5.180222735 |
| 1429728_at   | -0.096828083 | 7.119258319 | -0.994235838 | 0.345000437 | 0.345000437 | -5.180237368 |
| 1447635_at   | -0.081994075 | 4.172948018 | -0.994214157 | 0.345010452 | 0.345010452 | -5.180255987 |
| 1449289_a_at | -0.089904754 | 10.66360397 | -0.99419928  | 0.345017325 | 0.345017325 | -5.180268764 |
| 1439912_at   | 0.088352341  | 4.920761001 | 0.994126036  | 0.345051164 | 0.345051164 | -5.180331664 |
| 1444265_at   | 0.090131468  | 5.614060467 | 0.994092537  | 0.345066641 | 0.345066641 | -5.180360431 |
| 1456416_at   | -0.065000388 | 5.963958246 | -0.994090831 | 0.34506743  | 0.34506743  | -5.180361896 |
| 1416135_at   | 0.069393406  | 10.21633059 | 0.994075923  | 0.345074318 | 0.345074318 | -5.180374698 |
| 1438943_x_at | -0.115287114 | 11.44225962 | -0.993973434 | 0.345121674 | 0.345121674 | -5.180462703 |
| 1449768_at   | -0.070749999 | 4.649363103 | -0.993949394 | 0.345132783 | 0.345132783 | -5.180483345 |
| 1417344_at   | -0.072747181 | 10.10778038 | -0.99394909  | 0.345132923 | 0.345132923 | -5.180483606 |
| 1450811_at   | -0.082669466 | 3.402293469 | -0.993916017 | 0.345148207 | 0.345148207 | -5.180512003 |
| 1435147_x_at | -0.075055385 | 3.472414422 | -0.993881453 | 0.345164179 | 0.345164179 | -5.18054168  |
| 1451905_a_at | -0.066548962 | 3.881532021 | -0.993864974 | 0.345171795 | 0.345171795 | -5.180555828 |
| 1450801_at   | -0.076648792 | 5.806510503 | -0.993857262 | 0.345175359 | 0.345175359 | -5.180562449 |
| 1451635_at   | -0.134280411 | 3.399605222 | -0.993782348 | 0.345209981 | 0.345209981 | -5.180626766 |
| 1449429_at   | 0.111333954  | 7.451270077 | 0.993782179  | 0.345210059 | 0.345210059 | -5.180626911 |
| 1454604_s_at | 0.080629561  | 6.037217838 | 0.993776264  | 0.345212793 | 0.345212793 | -5.180631989 |
| 1456156_at   | -0.176361188 | 7.643445216 | -0.99375347  | 0.345223328 | 0.345223328 | -5.180651559 |
| 1459610_at   | -0.102010944 | 4.978069011 | -0.993582504 | 0.345302353 | 0.345302353 | -5.180798322 |
| 1420754_at   | -0.154436421 | 7.85173247  | -0.993580136 | 0.345303447 | 0.345303447 | -5.180800355 |
| 1415928_a_at | 0.106354949  | 10.54077183 | 0.993484711  | 0.345347561 | 0.345347561 | -5.180882263 |
| 1433066_at   | 0.080457531  | 3.411657805 | 0.993462721  | 0.345357728 | 0.345357728 | -5.180901137 |
| 1429431_at   | 0.103373579  | 8.275988269 | 0.993357088  | 0.345406567 | 0.345406567 | -5.180991799 |
| 1444880_at   | -0.075864054 | 3.651499067 | -0.993323571 | 0.345422064 | 0.345422064 | -5.181020564 |
| 1437713_x_at | 0.066353494  | 6.228284831 | 0.993316282  | 0.345425434 | 0.345425434 | -5.181026818 |
| 1440667_at   | -0.093065805 | 3.777916848 | -0.993305216 | 0.345430551 | 0.345430551 | -5.181036315 |
| 1444810_at   | -0.085461833 | 6.088296886 | -0.993254721 | 0.345453901 | 0.345453901 | -5.181079649 |
| 1452919_a_at | -0.070222927 | 8.626747519 | -0.993189725 | 0.345483957 | 0.345483957 | -5.181135424 |
| 1452913_at   | -0.109311777 | 5.106375214 | -0.993163954 | 0.345495875 | 0.345495875 | -5.181157539 |
| 1433571_at   | -0.093951497 | 7.190612802 | -0.993162512 | 0.345496542 | 0.345496542 | -5.181158777 |
| 1416136_at   | -0.086239785 | 11.13395357 | -0.993121738 | 0.345515398 | 0.345515398 | -5.181193764 |
| 1452195_s_at | -0.131867073 | 7.167971099 | -0.993117664 | 0.345517282 | 0.345517282 | -5.18119726  |
| 1448933_at   | 0.081771341  | 7.1592322   | 0.993102765  | 0.345524173 | 0.345524173 | -5.181210044 |
| 1416308_at   | -0.0652925   | 9.929390254 | -0.993097182 | 0.345526755 | 0.345526755 | -5.181214835 |
| 1442323_at   | -0.080111183 | 6.245816882 | -0.993051248 | 0.345548    | 0.345548    | -5.181254248 |
| 1420274_at   | 0.071012281  | 3.257838705 | 0.992995726  | 0.34557368  | 0.34557368  | -5.181301886 |
| 1450065_at   | 0.122177979  | 6.00081517  | 0.992991918  | 0.345575441 | 0.345575441 | -5.181305153 |
| 1432270_a_at | 0.110649722  | 10.73307527 | 0.992986824  | 0.345577797 | 0.345577797 | -5.181309523 |
| 1433848_at   | -0.092106844 | 7.196875374 | -0.992985873 | 0.345578237 | 0.345578237 | -5.181310339 |
| 1445912_at   | -0.081854068 | 4.8384985   | -0.992972169 | 0.345584576 | 0.345584576 | -5.181322098 |
| 1438430_at   | 0.064137096  | 9.117737337 | 0.992924734  | 0.345606517 | 0.345606517 | -5.181362794 |
| 1433024_at   | -0.077842754 | 3.902993771 | -0.992835941 | 0.345647592 | 0.345647592 | -5.18143897  |

|              |              |             |              |             |             |              |
|--------------|--------------|-------------|--------------|-------------|-------------|--------------|
| 1443369_at   | -0.12124186  | 4.751384275 | -0.992684476 | 0.345717667 | 0.345717667 | -5.181568901 |
| 1439569_at   | -0.176350566 | 4.225256852 | -0.992635122 | 0.345740502 | 0.345740502 | -5.181611235 |
| 1428445_at   | -0.069987524 | 9.195118042 | -0.992604289 | 0.345754769 | 0.345754769 | -5.181637681 |
| 1456452_at   | -0.075244224 | 3.551079934 | -0.992553656 | 0.345778198 | 0.345778198 | -5.181681109 |
| 1456238_at   | 0.082939899  | 4.569868998 | 0.992507487  | 0.345799563 | 0.345799563 | -5.181720707 |
| 1427292_at   | 0.068287569  | 3.316150972 | 0.992401456  | 0.345848632 | 0.345848632 | -5.181811641 |
| 1417806_at   | -0.090664217 | 6.100766058 | -0.992312998 | 0.345889574 | 0.345889574 | -5.181887499 |
| 1424085_at   | -0.063633554 | 11.30996807 | -0.992184978 | 0.345948831 | 0.345948831 | -5.181997273 |
| 1426765_at   | 0.076571286  | 8.517358793 | 0.992062848  | 0.34600537  | 0.34600537  | -5.182101986 |
| 1448107_x_at | -0.079062018 | 3.452288713 | -0.992039249 | 0.346016296 | 0.346016296 | -5.182122219 |
| 1449879_at   | -0.098112426 | 3.146923901 | -0.992013112 | 0.346028396 | 0.346028396 | -5.182144627 |
| 1438804_at   | -0.094117019 | 3.53094524  | -0.992007417 | 0.346031033 | 0.346031033 | -5.182149509 |
| 1453017_at   | 0.089118058  | 8.071009951 | 0.99200466   | 0.34603231  | 0.34603231  | -5.182151873 |
| 1417541_at   | 0.07338852   | 9.076628259 | 0.991973525  | 0.346046725 | 0.346046725 | -5.182178565 |
| 1428047_s_at | 0.164540634  | 7.061802692 | 0.99194471   | 0.346060067 | 0.346060067 | -5.182203268 |
| 1426862_at   | 0.074796383  | 8.079943355 | 0.991944371  | 0.346060224 | 0.346060224 | -5.182203559 |
| 1442729_at   | -0.100575135 | 4.474492603 | -0.991898822 | 0.346081314 | 0.346081314 | -5.182242605 |
| 1458422_at   | -0.071693483 | 4.44901091  | -0.991878884 | 0.346090546 | 0.346090546 | -5.182259696 |
| 1443256_at   | -0.080603776 | 3.749537831 | -0.991829209 | 0.346113549 | 0.346113549 | -5.182302279 |
| 1421603_a_at | -0.097151976 | 5.470268996 | -0.991791875 | 0.346130838 | 0.346130838 | -5.18233428  |
| 1445801_at   | -0.06552436  | 6.860030501 | -0.991765919 | 0.346142858 | 0.346142858 | -5.18235653  |
| 1434946_at   | 0.081833205  | 6.397182756 | 0.991753036  | 0.346148824 | 0.346148824 | -5.182367572 |
| 1427861_at   | -0.069127311 | 6.12930207  | -0.99175169  | 0.346149448 | 0.346149448 | -5.182368726 |
| 1432817_x_at | -0.108860489 | 4.4303983   | -0.991728802 | 0.346160047 | 0.346160047 | -5.182388344 |
| 1451729_at   | -0.095590065 | 5.530244247 | -0.991703072 | 0.346171964 | 0.346171964 | -5.182410398 |
| 1437955_at   | 0.075390842  | 5.097073294 | 0.991701291  | 0.346172788 | 0.346172788 | -5.182411924 |
| 1423991_at   | 0.065340062  | 7.896064012 | 0.991631142  | 0.346205278 | 0.346205278 | -5.182472048 |
| 1422569_at   | 0.07948447   | 10.83011032 | 0.991617936  | 0.346211394 | 0.346211394 | -5.182483365 |
| 1455459_at   | 0.08629664   | 7.81121648  | 0.991584365  | 0.346226944 | 0.346226944 | -5.182512137 |
| 1456350_at   | -0.131868455 | 7.791134655 | -0.991558148 | 0.346239087 | 0.346239087 | -5.182534606 |
| 1440595_at   | 0.076446584  | 7.809472594 | 0.991552473  | 0.346241716 | 0.346241716 | -5.182539469 |
| 1429179_at   | 0.085707089  | 4.193159528 | 0.991531391  | 0.346251481 | 0.346251481 | -5.182557537 |
| 1416553_at   | -0.083994103 | 8.770642275 | -0.991462491 | 0.346283397 | 0.346283397 | -5.182616581 |
| 1430821_at   | -0.087426381 | 4.244473742 | -0.991398491 | 0.346313046 | 0.346313046 | -5.182671425 |
| 1451520_at   | -0.067304349 | 10.43853761 | -0.991378475 | 0.346322318 | 0.346322318 | -5.182688576 |
| 1440568_at   | 0.08546168   | 4.119463136 | 0.991366473  | 0.346327879 | 0.346327879 | -5.182698861 |
| 1457615_at   | 0.154843387  | 4.480078081 | 0.991364064  | 0.346328995 | 0.346328995 | -5.182700925 |
| 1426228_at   | 0.076598382  | 3.274382695 | 0.991360475  | 0.346330658 | 0.346330658 | -5.182704001 |
| 1419350_at   | -0.095930042 | 6.72021014  | -0.991327521 | 0.346345925 | 0.346345925 | -5.182732237 |
| 1426688_at   | -0.062563864 | 10.86390218 | -0.991262471 | 0.346376064 | 0.346376064 | -5.182787974 |
| 1420868_s_at | -0.086346302 | 9.886072846 | -0.99111384  | 0.346444935 | 0.346444935 | -5.182915315 |
| 1453091_s_at | -0.093178946 | 7.513368742 | -0.991072106 | 0.346464275 | 0.346464275 | -5.182951068 |
| 1457123_at   | 0.059759037  | 4.214474745 | 0.990868608  | 0.34655859  | 0.34655859  | -5.183125387 |
| 1422961_at   | 0.080990417  | 3.614860743 | 0.990741108  | 0.346617692 | 0.346617692 | -5.183234591 |
| 1424824_at   | 0.121355604  | 4.212625293 | 0.990594058  | 0.346685865 | 0.346685865 | -5.183360526 |
| 1452766_at   | -0.084905467 | 3.565338778 | -0.990480734 | 0.34673841  | 0.34673841  | -5.183457567 |
| 1423984_a_at | -0.092100581 | 6.330838746 | -0.990460583 | 0.346747754 | 0.346747754 | -5.183474822 |
| 1453203_at   | -0.071549127 | 3.594259333 | -0.990438153 | 0.346758155 | 0.346758155 | -5.183494028 |
| 1453607_at   | 0.073518362  | 4.243314907 | 0.990363594  | 0.34679273  | 0.34679273  | -5.183557867 |
| 1436876_at   | -0.074747277 | 7.34441393  | -0.990283671 | 0.346829796 | 0.346829796 | -5.183626295 |
| 1433172_at   | 0.081552582  | 3.65172467  | 0.990270379  | 0.34683596  | 0.34683596  | -5.183637674 |
| 1449059_a_at | -0.071275978 | 11.55379208 | -0.990256783 | 0.346842266 | 0.346842266 | -5.183649315 |
| 1440638_at   | -0.084096619 | 4.028153201 | -0.99015637  | 0.346888839 | 0.346888839 | -5.183735278 |



|              |              |             |              |             |             |              |
|--------------|--------------|-------------|--------------|-------------|-------------|--------------|
| 1452503_a_at | 0.106335759  | 5.075023119 | 0.990155504  | 0.346889241 | 0.346889241 | -5.183736019 |
| 1434850_at   | -0.076369122 | 7.956970146 | -0.990056306 | 0.346935256 | 0.346935256 | -5.183820935 |
| 1440790_x_at | -0.089062357 | 6.048293862 | -0.989986572 | 0.346967605 | 0.346967605 | -5.183880625 |
| 1437954_at   | 0.094840033  | 4.791516202 | 0.98998234   | 0.346969569 | 0.346969569 | -5.183884247 |
| 1417827_at   | -0.06382049  | 9.066343056 | -0.989934599 | 0.346991717 | 0.346991717 | -5.18392511  |
| 1441785_at   | -0.064593003 | 3.933304745 | -0.989855123 | 0.347028591 | 0.347028591 | -5.183993132 |
| 1427737_a_at | 0.098249997  | 7.111558839 | 0.989790178  | 0.347058725 | 0.347058725 | -5.184048714 |
| 1421820_a_at | 0.076515951  | 9.27672471  | 0.989627266  | 0.347134325 | 0.347134325 | -5.184188127 |
| 1435963_at   | 0.112390108  | 6.095097419 | 0.989617971  | 0.347138638 | 0.347138638 | -5.184196081 |
| 1433977_at   | 0.101405359  | 5.851878362 | 0.98953922   | 0.347175187 | 0.347175187 | -5.184263465 |
| 1429679_at   | 0.065126837  | 9.501447307 | 0.989490513  | 0.347197794 | 0.347197794 | -5.18430514  |
| 1442912_at   | -0.088486557 | 4.155687212 | -0.989392162 | 0.347243446 | 0.347243446 | -5.184389286 |
| 1435682_at   | 0.10646458   | 8.191083706 | 0.989318737  | 0.347277531 | 0.347277531 | -5.184452103 |
| 1456423_at   | 0.08094812   | 6.704170029 | 0.989274394  | 0.347298116 | 0.347298116 | -5.184490037 |
| 1424456_at   | 0.078280591  | 7.407926285 | 0.989250768  | 0.347309085 | 0.347309085 | -5.184510249 |
| 1448485_at   | -0.102656683 | 4.456372851 | -0.989233601 | 0.347317055 | 0.347317055 | -5.184524934 |
| 1456658_at   | 0.101330168  | 4.030365992 | 0.98913817   | 0.347361362 | 0.347361362 | -5.184606565 |
| 1434528_at   | 0.154992437  | 6.599576704 | 0.989053899  | 0.347400492 | 0.347400492 | -5.184678645 |
| 1458277_at   | 0.083017886  | 5.770163919 | 0.989016883  | 0.347417681 | 0.347417681 | -5.184710305 |
| 1438336_at   | 0.11564502   | 6.847700662 | 0.989005817  | 0.347422819 | 0.347422819 | -5.18471977  |
| 1442578_at   | 0.115702124  | 5.34916968  | 0.988871923  | 0.347485    | 0.347485    | -5.184834281 |
| 1459630_at   | 0.16973978   | 5.721056494 | 0.988846539  | 0.347496789 | 0.347496789 | -5.184855988 |
| 1452615_s_at | 0.069504281  | 6.590588766 | 0.988715773  | 0.347557527 | 0.347557527 | -5.184967809 |
| 1424424_at   | 0.064561364  | 9.210136102 | 0.988673436  | 0.347577193 | 0.347577193 | -5.18500401  |
| 1418445_at   | 0.125465616  | 7.245212994 | 0.988672351  | 0.347577697 | 0.347577697 | -5.185004938 |
| 1440671_at   | -0.09563276  | 7.093654259 | -0.988654263 | 0.347586099 | 0.347586099 | -5.185020404 |
| 1434773_a_at | 0.086909115  | 10.27265241 | 0.98863532   | 0.347594899 | 0.347594899 | -5.185036601 |
| 1441449_at   | -0.092460464 | 7.277177129 | -0.988533611 | 0.34764215  | 0.34764215  | -5.185123561 |
| 1448391_at   | 0.068791836  | 9.677604768 | 0.988529032  | 0.347644277 | 0.347644277 | -5.185127476 |
| 1451701_x_at | -0.170164079 | 7.660570834 | -0.988507028 | 0.3476545   | 0.3476545   | -5.185146289 |
| 1460144_at   | -0.104745509 | 6.134893458 | -0.988479525 | 0.347667278 | 0.347667278 | -5.185169802 |
| 1448457_at   | -0.084636899 | 5.73968839  | -0.988431462 | 0.347689609 | 0.347689609 | -5.18521089  |
| 1433958_at   | 0.06738527   | 7.988867576 | 0.988422283  | 0.347693875 | 0.347693875 | -5.185218738 |
| 1436937_at   | 0.068246514  | 8.646032312 | 0.98836504   | 0.347720473 | 0.347720473 | -5.185267672 |
| 1422062_at   | 0.136454492  | 6.818969308 | 0.988342165  | 0.347731102 | 0.347731102 | -5.185287227 |
| 1418853_at   | -0.10835661  | 5.617688187 | -0.988306498 | 0.347747676 | 0.347747676 | -5.185317715 |
| 1417210_at   | 1.456179596  | 5.422186382 | 0.988254541  | 0.347771821 | 0.347771821 | -5.185362128 |
| 1421832_at   | 0.084711008  | 9.507513609 | 0.988204873  | 0.347794903 | 0.347794903 | -5.185404581 |
| 1455005_s_at | 0.092545626  | 6.069699641 | 0.988081568  | 0.347852211 | 0.347852211 | -5.185509969 |
| 1415918_a_at | -0.080618668 | 12.00238664 | -0.987984504 | 0.347897328 | 0.347897328 | -5.185592921 |
| 1457283_at   | 0.177244354  | 4.546633735 | 0.98797511   | 0.347901695 | 0.347901695 | -5.185600949 |
| 1443543_at   | -0.066242296 | 3.293173019 | -0.987942073 | 0.347917053 | 0.347917053 | -5.185629182 |
| 1431690_at   | -0.076676324 | 4.491076538 | -0.987888781 | 0.347941827 | 0.347941827 | -5.185674722 |
| 1418508_a_at | -0.095485667 | 7.327296853 | -0.9878325   | 0.347967991 | 0.347967991 | -5.185722813 |
| 1420022_s_at | -0.07577945  | 4.256016785 | -0.987793975 | 0.347985903 | 0.347985903 | -5.185755732 |
| 1440364_a_at | 0.090976027  | 6.489471913 | 0.987618524  | 0.348067482 | 0.348067482 | -5.185905636 |
| 1444219_at   | -0.103099456 | 4.120951962 | -0.987583054 | 0.348083977 | 0.348083977 | -5.185935939 |
| 1445665_at   | 0.069027224  | 5.412271207 | 0.987571357  | 0.348089416 | 0.348089416 | -5.185945932 |
| 1457145_at   | -0.115667462 | 5.570004359 | -0.987493605 | 0.348125574 | 0.348125574 | -5.186012354 |
| 1433783_at   | -0.395678258 | 6.166838596 | -0.987472283 | 0.348135491 | 0.348135491 | -5.186030568 |
| 1426639_a_at | -0.078946564 | 7.200238512 | -0.98741564  | 0.348161835 | 0.348161835 | -5.186078953 |
| 1440265_at   | 0.083463772  | 3.962322016 | 0.987303372  | 0.348214054 | 0.348214054 | -5.186174848 |
| 1438614_x_at | -0.070937165 | 3.213131755 | -0.9871583   | 0.34828154  | 0.34828154  | -5.18629875  |

|              |              |             |              |             |             |              |
|--------------|--------------|-------------|--------------|-------------|-------------|--------------|
| 1434955_at   | 0.073854831  | 3.430586546 | 0.987120222  | 0.348299255 | 0.348299255 | -5.186331269 |
| 1456907_at   | -0.090533945 | 3.50444333  | -0.987102079 | 0.348307696 | 0.348307696 | -5.186346763 |
| 1452797_at   | 0.070356341  | 7.554837373 | 0.987066934  | 0.348324047 | 0.348324047 | -5.186376775 |
| 1437000_at   | -0.075332061 | 7.033864592 | -0.986992406 | 0.348358724 | 0.348358724 | -5.186440417 |
| 1423782_at   | 0.072777678  | 9.818080645 | 0.986943081  | 0.348381675 | 0.348381675 | -5.186482536 |
| 1419087_s_at | 0.065210103  | 7.33656633  | 0.986928208  | 0.348388596 | 0.348388596 | -5.186495235 |
| 1431014_at   | 0.079865923  | 3.675601856 | 0.986884767  | 0.348408811 | 0.348408811 | -5.186532327 |
| 1430802_at   | -0.08148726  | 3.503573864 | -0.986877152 | 0.348412354 | 0.348412354 | -5.186538829 |
| 1458043_at   | 0.086979263  | 4.754895351 | 0.986870707  | 0.348415354 | 0.348415354 | -5.186544332 |
| 1459199_at   | -0.112964674 | 4.113673417 | -0.986865456 | 0.348417797 | 0.348417797 | -5.186548816 |
| 1426567_a_at | -0.07393668  | 7.148037406 | -0.986814109 | 0.348441693 | 0.348441693 | -5.186592656 |
| 1431339_a_at | -0.184679583 | 7.961900385 | -0.986800688 | 0.348447939 | 0.348447939 | -5.186604115 |
| 1440320_at   | 0.090689448  | 6.942880268 | 0.986717581  | 0.348486617 | 0.348486617 | -5.186675067 |
| 1434499_a_at | -0.083980785 | 9.582553977 | -0.986680182 | 0.348504024 | 0.348504024 | -5.186706995 |
| 1447390_at   | -0.078063747 | 3.496179938 | -0.986641436 | 0.348522058 | 0.348522058 | -5.186740072 |
| 1448160_at   | -0.077931056 | 7.211915469 | -0.986629602 | 0.348527567 | 0.348527567 | -5.186750174 |
| 1444877_at   | -0.075280314 | 3.597881216 | -0.986626821 | 0.348528861 | 0.348528861 | -5.186752548 |
| 1446489_at   | 0.069538884  | 6.914366741 | 0.986584413  | 0.348548601 | 0.348548601 | -5.18678875  |
| 1449657_at   | -0.108416011 | 3.960526811 | -0.986477808 | 0.348598227 | 0.348598227 | -5.186879747 |
| 1447899_x_at | -0.064134098 | 7.33936988  | -0.986416202 | 0.348626907 | 0.348626907 | -5.18693233  |
| 1452590_a_at | -0.109301064 | 7.515859753 | -0.986395089 | 0.348636737 | 0.348636737 | -5.18695035  |
| 1457791_at   | -0.066958629 | 5.648449267 | -0.98632929  | 0.348667372 | 0.348667372 | -5.187006508 |
| 1419036_at   | -0.067322493 | 9.195733918 | -0.986266037 | 0.348696824 | 0.348696824 | -5.187060491 |
| 1439254_at   | 0.079461543  | 5.110913588 | 0.986263147  | 0.34869817  | 0.34869817  | -5.187062957 |
| 1444276_at   | -0.08070283  | 4.392883187 | -0.986175097 | 0.348739171 | 0.348739171 | -5.187138097 |
| 1439858_at   | -0.075893529 | 6.797124144 | -0.9861697   | 0.348741684 | 0.348741684 | -5.187142703 |
| 1432762_at   | -0.102999131 | 4.431043601 | -0.986111278 | 0.348768891 | 0.348768891 | -5.187192556 |
| 1421368_at   | -0.067058555 | 3.829485456 | -0.986097211 | 0.348775441 | 0.348775441 | -5.187204559 |
| 1439170_at   | 0.086663351  | 7.954738236 | 0.986058382  | 0.348793525 | 0.348793525 | -5.187237691 |
| 1451652_a_at | 0.081875731  | 10.37171177 | 0.986052108  | 0.348796447 | 0.348796447 | -5.187243045 |
| 1417381_at   | 0.119154573  | 7.594994133 | 0.98603752   | 0.348803241 | 0.348803241 | -5.187255493 |
| 1440887_at   | -0.066099883 | 5.396917722 | -0.986027311 | 0.348807996 | 0.348807996 | -5.187264203 |
| 1429113_at   | 0.066225649  | 7.964161079 | 0.985903278  | 0.348865767 | 0.348865767 | -5.187370029 |
| 1429391_at   | -0.119698617 | 4.17583368  | -0.985862504 | 0.34888476  | 0.34888476  | -5.187404816 |
| 1442773_at   | 0.065324669  | 3.597479549 | 0.985862284  | 0.348884862 | 0.348884862 | -5.187405003 |
| 1445660_at   | 0.078445844  | 4.264730982 | 0.985792536  | 0.348917353 | 0.348917353 | -5.187464507 |
| 1422772_at   | -0.107181356 | 7.790699731 | -0.985510443 | 0.349048785 | 0.349048785 | -5.187705131 |
| 1460006_at   | 0.081575903  | 7.720654083 | 0.98546538   | 0.349069784 | 0.349069784 | -5.187743564 |
| 1450677_at   | 0.077343858  | 7.854628006 | 0.985457517  | 0.349073449 | 0.349073449 | -5.187750271 |
| 1418091_at   | -0.090896241 | 4.973766634 | -0.985361647 | 0.349118127 | 0.349118127 | -5.187832032 |
| 1438047_at   | 0.063974659  | 9.563967587 | 0.985256089  | 0.349167324 | 0.349167324 | -5.187922047 |
| 1416107_at   | 0.217414197  | 6.781606754 | 0.985230656  | 0.349179179 | 0.349179179 | -5.187943735 |
| 1449093_at   | 0.067550732  | 8.793613822 | 0.985215372  | 0.349186303 | 0.349186303 | -5.187956767 |
| 1434790_a_at | 0.066011607  | 10.80201981 | 0.985158264  | 0.349212922 | 0.349212922 | -5.188005462 |
| 1420542_at   | 0.136378633  | 5.116252805 | 0.985130068  | 0.349226066 | 0.349226066 | -5.188029503 |
| 1447104_at   | 0.081931821  | 4.346703473 | 0.985126687  | 0.349227642 | 0.349227642 | -5.188032386 |
| 1447228_at   | -0.086333311 | 6.945975044 | -0.984896785 | 0.349334825 | 0.349334825 | -5.188228392 |
| 1423257_at   | -0.072441981 | 3.673079936 | -0.984765292 | 0.349396139 | 0.349396139 | -5.188340481 |
| 1434533_x_at | -0.064067521 | 3.135606247 | -0.984748291 | 0.349404067 | 0.349404067 | -5.188354972 |
| 1445706_x_at | 0.100138806  | 7.143282524 | 0.984741284  | 0.349407335 | 0.349407335 | -5.188360945 |
| 1436533_at   | 0.140173875  | 8.901225258 | 0.984725786  | 0.349414562 | 0.349414562 | -5.188374155 |
| 1418703_at   | 0.083755237  | 10.32560466 | 0.984724071  | 0.349415362 | 0.349415362 | -5.188375616 |
| 1460142_at   | 0.07800607   | 4.4355477   | 0.984607453  | 0.349469749 | 0.349469749 | -5.188475013 |

|                |              |             |              |             |             |              |
|----------------|--------------|-------------|--------------|-------------|-------------|--------------|
| 1431501_at     | 0.080591071  | 3.636281435 | 0.984589085  | 0.349478316 | 0.349478316 | -5.188490668 |
| 1420909_at     | 0.084770965  | 8.453295864 | 0.984543005  | 0.349499809 | 0.349499809 | -5.18852994  |
| 1432724_at     | -0.089728475 | 3.568964678 | -0.984486611 | 0.349526113 | 0.349526113 | -5.188578    |
| 1438163_x_at   | -0.065241923 | 5.833033624 | -0.984398739 | 0.349567103 | 0.349567103 | -5.188652881 |
| 1447737_at     | 0.068374515  | 3.150409406 | 0.984388096  | 0.349572068 | 0.349572068 | -5.188661951 |
| 1427252_at     | -0.084407911 | 4.874811973 | -0.984280069 | 0.349622465 | 0.349622465 | -5.188754001 |
| 1442627_at     | 0.075292826  | 4.323793174 | 0.98416108   | 0.349677982 | 0.349677982 | -5.188855382 |
| 1421990_at     | 0.092694617  | 4.464066164 | 0.984118271  | 0.349697958 | 0.349697958 | -5.188891854 |
| 1441065_at     | 0.078592525  | 4.739410682 | 0.984117555  | 0.349698291 | 0.349698291 | -5.188892463 |
| 1416419_s_at   | -0.065150797 | 9.111495099 | -0.983960816 | 0.349771435 | 0.349771435 | -5.189025989 |
| 1457838_at     | 0.075104856  | 6.381055827 | 0.983933202  | 0.349784323 | 0.349784323 | -5.189049512 |
| 1434484_at     | 0.073933655  | 4.104739933 | 0.983902236  | 0.349798775 | 0.349798775 | -5.189075889 |
| 1416178_a_at   | 0.101106713  | 6.240935338 | 0.98384397   | 0.34982597  | 0.34982597  | -5.189125519 |
| 1449377_at     | -0.064493721 | 8.087735149 | -0.983779443 | 0.349856089 | 0.349856089 | -5.189180479 |
| 1446310_at     | -0.104983894 | 4.037722926 | -0.983712627 | 0.349887278 | 0.349887278 | -5.189237386 |
| 1444816_at     | -0.097113622 | 3.711899603 | -0.983681015 | 0.349902035 | 0.349902035 | -5.189264308 |
| 1428643_at     | 0.119674498  | 7.155065271 | 0.983676109  | 0.349904325 | 0.349904325 | -5.189268487 |
| 1459469_at     | 0.088361729  | 6.136125271 | 0.983668735  | 0.349907768 | 0.349907768 | -5.189274767 |
| 1426062_a_at   | -0.11493979  | 7.120745707 | -0.983542783 | 0.349966569 | 0.349966569 | -5.189382028 |
| 1458831_at     | -0.070882156 | 4.318625776 | -0.983465968 | 0.350002434 | 0.350002434 | -5.189447438 |
| 1435753_a_at   | -0.089445347 | 8.699059234 | -0.983414257 | 0.35002658  | 0.35002658  | -5.18949147  |
| 1447043_at     | -0.097892758 | 4.264406437 | -0.98340695  | 0.350029992 | 0.350029992 | -5.189497691 |
| 1431654_at     | 0.073139585  | 4.188055433 | 0.983210275  | 0.350121839 | 0.350121839 | -5.189665141 |
| 1456607_at     | -0.099529904 | 6.829429654 | -0.983156349 | 0.350147025 | 0.350147025 | -5.189711048 |
| 1420207_at     | 0.081789914  | 3.103378403 | 0.98314066   | 0.350154353 | 0.350154353 | -5.189724404 |
| 1422152_at     | -0.078129221 | 4.682748733 | -0.983129157 | 0.350159725 | 0.350159725 | -5.189734196 |
| 1420944_at     | 0.103556571  | 8.846571658 | 0.983113206  | 0.350167176 | 0.350167176 | -5.189747775 |
| 1421682_a_at   | -0.091457625 | 3.910521406 | -0.983109963 | 0.350168691 | 0.350168691 | -5.189750535 |
| AFFX-DapX-M_at | 0.111368677  | 7.931927743 | 0.983062269  | 0.350190968 | 0.350190968 | -5.189791134 |
| 1425967_a_at   | -0.076218089 | 3.768200549 | -0.983010462 | 0.350215168 | 0.350215168 | -5.189835233 |
| 1423844_s_at   | -0.082737899 | 5.431038671 | -0.982999121 | 0.350220466 | 0.350220466 | -5.189844887 |
| 1419212_at     | -0.080555068 | 6.537772755 | -0.982966091 | 0.350235896 | 0.350235896 | -5.189873001 |
| 1425236_at     | 0.08883781   | 3.923341686 | 0.982705198  | 0.350357789 | 0.350357789 | -5.190095041 |
| 1417953_at     | -0.086112088 | 9.452191014 | -0.982666296 | 0.350375967 | 0.350375967 | -5.190128145 |
| 1453716_at     | -0.095576936 | 4.010090128 | -0.982629279 | 0.350393265 | 0.350393265 | -5.190159645 |
| 1459665_s_at   | 0.073459232  | 4.732480647 | 0.982622217  | 0.350396565 | 0.350396565 | -5.190165654 |
| 1420124_s_at   | -0.060839215 | 8.075382579 | -0.982560212 | 0.350425542 | 0.350425542 | -5.190218415 |
| 1435017_at     | -0.181154754 | 7.959924862 | -0.982430707 | 0.350486069 | 0.350486069 | -5.190328604 |
| 1459196_at     | -0.116480484 | 4.526763233 | -0.982399005 | 0.350500886 | 0.350500886 | -5.190355575 |
| 1442136_at     | 0.065347922  | 3.739064957 | 0.982366161  | 0.350516238 | 0.350516238 | -5.190383517 |
| 1438537_at     | -0.081919629 | 5.404827852 | -0.982329275 | 0.35053348  | 0.35053348  | -5.190414898 |
| 1455084_x_at   | 0.066741901  | 9.545695919 | 0.98232177   | 0.350536988 | 0.350536988 | -5.190421283 |
| 1451938_a_at   | 0.070100617  | 4.788694087 | 0.98228843   | 0.350552573 | 0.350552573 | -5.190449646 |
| 1451779_at     | 0.110739213  | 7.15628177  | 0.982258669  | 0.350566486 | 0.350566486 | -5.190474963 |
| 1447245_at     | 0.073505206  | 3.694441718 | 0.982251246  | 0.350569956 | 0.350569956 | -5.190481278 |
| 1430064_at     | -0.070030646 | 5.789658854 | -0.982208892 | 0.350589756 | 0.350589756 | -5.190517307 |
| 1438999_a_at   | -0.077867723 | 8.916626879 | -0.98220717  | 0.350590561 | 0.350590561 | -5.190518772 |
| 1430355_a_at   | -0.084671234 | 3.692310869 | -0.982101564 | 0.350639935 | 0.350639935 | -5.190608601 |
| 1418873_at     | 0.124233917  | 6.799286935 | 0.982056699  | 0.350660912 | 0.350660912 | -5.190646762 |
| 1457084_at     | -0.082776885 | 4.142110906 | -0.982042319 | 0.350667636 | 0.350667636 | -5.190658993 |
| 1437398_a_at   | -0.087557875 | 8.646200769 | -0.982029652 | 0.350673558 | 0.350673558 | -5.190669766 |
| 1429402_at     | -0.072734164 | 7.708235914 | -0.981939795 | 0.350715576 | 0.350715576 | -5.190746189 |
| 1451577_at     | -0.134693693 | 7.168129498 | -0.981936601 | 0.35071707  | 0.35071707  | -5.190748905 |

|              |              |             |              |             |             |              |
|--------------|--------------|-------------|--------------|-------------|-------------|--------------|
| 1430671_a_at | 0.062695805  | 6.489887482 | 0.981933386  | 0.350718573 | 0.350718573 | -5.19075164  |
| 1436722_a_at | 0.062669615  | 14.00757285 | 0.981928904  | 0.350720669 | 0.350720669 | -5.190755451 |
| 1443072_at   | -0.0961441   | 4.226905751 | -0.981866249 | 0.350749969 | 0.350749969 | -5.190808735 |
| 1452933_at   | -0.079391964 | 7.216639524 | -0.981854391 | 0.350755515 | 0.350755515 | -5.19081882  |
| 1443158_at   | -0.100399475 | 6.585518654 | -0.981836649 | 0.350763812 | 0.350763812 | -5.190833907 |
| 1431615_at   | 0.072125526  | 3.367309453 | 0.981785438  | 0.350787763 | 0.350787763 | -5.190877456 |
| 1422844_a_at | 0.067287485  | 9.789729091 | 0.981585079  | 0.350881479 | 0.350881479 | -5.191047819 |
| 1460171_at   | 0.059010518  | 10.47569938 | 0.981583969  | 0.350881999 | 0.350881999 | -5.191048763 |
| 1453808_at   | 0.100705675  | 5.957363487 | 0.981567412  | 0.350889744 | 0.350889744 | -5.19106284  |
| 1443057_at   | -0.161505528 | 6.645777068 | -0.981552804 | 0.350896578 | 0.350896578 | -5.19107526  |
| 1421012_at   | -0.069584688 | 7.412836253 | -0.981528417 | 0.350907986 | 0.350907986 | -5.191095993 |
| 1439941_at   | -0.098426513 | 3.799976892 | -0.981493409 | 0.350924363 | 0.350924363 | -5.191125756 |
| 1451657_a_at | 0.073054279  | 4.890340283 | 0.981440117  | 0.350949296 | 0.350949296 | -5.191171062 |
| 1445935_at   | 0.068909946  | 5.607847593 | 0.981437838  | 0.350950362 | 0.350950362 | -5.191172999 |
| 1423286_at   | 0.216781251  | 6.256376227 | 0.981420653  | 0.350958403 | 0.350958403 | -5.191187609 |
| 1431105_a_at | -0.097720284 | 7.47936237  | -0.981414131 | 0.350961454 | 0.350961454 | -5.191193153 |
| 1433515_s_at | -0.0771235   | 7.191047641 | -0.981385863 | 0.35097468  | 0.35097468  | -5.191217183 |
| 1416477_at   | 0.088523265  | 10.98815691 | 0.981330254  | 0.351000699 | 0.351000699 | -5.191264454 |
| 1438963_s_at | -0.08719822  | 8.042419386 | -0.981312393 | 0.351009056 | 0.351009056 | -5.191279637 |
| 1447224_at   | -0.083135393 | 5.591312093 | -0.981295902 | 0.351016772 | 0.351016772 | -5.191293655 |
| 1458901_at   | -0.101550953 | 3.75328606  | -0.98126539  | 0.35103105  | 0.35103105  | -5.191319591 |
| 1418398_a_at | 0.104522884  | 3.967725475 | 0.981226991  | 0.351049019 | 0.351049019 | -5.191352229 |
| 1451908_a_at | -0.107793632 | 6.965216279 | -0.981219154 | 0.351052686 | 0.351052686 | -5.19135889  |
| 1459176_at   | -0.077651575 | 3.773479145 | -0.98119704  | 0.351063035 | 0.351063035 | -5.191377687 |
| 1440140_at   | -0.077130156 | 4.751990026 | -0.981186484 | 0.351067975 | 0.351067975 | -5.191386659 |
| 1439533_at   | -0.078200089 | 5.861778703 | -0.981127065 | 0.351095782 | 0.351095782 | -5.19143716  |
| 1460742_at   | -0.080775366 | 7.911188213 | -0.981081211 | 0.351117242 | 0.351117242 | -5.191476132 |
| 1433204_at   | 0.068569951  | 5.568762953 | 0.981075651  | 0.351119844 | 0.351119844 | -5.191480857 |
| 1457369_at   | 0.108269717  | 4.962154024 | 0.980974501  | 0.351167187 | 0.351167187 | -5.191566818 |
| 1436436_at   | 0.070886588  | 6.756364381 | 0.980952188  | 0.351177632 | 0.351177632 | -5.19158578  |
| 1445107_at   | 0.126925682  | 6.479567181 | 0.980881768  | 0.351210595 | 0.351210595 | -5.191645621 |
| 1437181_at   | 0.105072178  | 6.393403442 | 0.980821877  | 0.351238632 | 0.351238632 | -5.191696511 |
| 1456217_at   | -0.083888305 | 5.931460469 | -0.980789666 | 0.351253711 | 0.351253711 | -5.19172388  |
| 1437247_at   | 0.112520779  | 8.911298225 | 0.980582908  | 0.351350516 | 0.351350516 | -5.191899543 |
| 1420625_at   | 0.066536433  | 5.80195793  | 0.980489945  | 0.351394048 | 0.351394048 | -5.191978516 |
| 1428044_at   | 0.075613645  | 5.730295308 | 0.980473187  | 0.351401896 | 0.351401896 | -5.191992752 |
| 1420215_x_at | -0.08253547  | 3.957876676 | -0.980453205 | 0.351411253 | 0.351411253 | -5.192009725 |
| 1448390_a_at | -0.076933542 | 7.867770755 | -0.980444263 | 0.351415441 | 0.351415441 | -5.192017321 |
| 1454072_at   | -0.081266215 | 4.377854012 | -0.98043713  | 0.351418782 | 0.351418782 | -5.19202338  |
| 1422526_at   | -0.106520874 | 6.228349828 | -0.980384966 | 0.351443211 | 0.351443211 | -5.192067689 |
| 1457818_at   | -0.100901609 | 3.628575132 | -0.980360071 | 0.351454871 | 0.351454871 | -5.192088835 |
| 1423146_at   | -0.081829849 | 4.96079347  | -0.980330221 | 0.351468851 | 0.351468851 | -5.192114189 |
| 1416449_x_at | 0.090050232  | 6.825847732 | 0.980324578  | 0.351471494 | 0.351471494 | -5.192118981 |
| 1423882_at   | -0.070915961 | 8.61215545  | -0.980308659 | 0.351478951 | 0.351478951 | -5.192132502 |
| 1427200_at   | 0.061791414  | 7.90946771  | 0.980307641  | 0.351479428 | 0.351479428 | -5.192133367 |
| 1421793_at   | -0.093431629 | 5.041291387 | -0.980167815 | 0.351544923 | 0.351544923 | -5.192252121 |
| 1432140_at   | 0.073297536  | 4.969903038 | 0.980045737  | 0.351602113 | 0.351602113 | -5.192355791 |
| 1421087_at   | 0.114177113  | 6.317384639 | 0.979950439  | 0.351646762 | 0.351646762 | -5.192436712 |
| 1452566_at   | -0.074489404 | 5.8903307   | -0.979891834 | 0.351674222 | 0.351674222 | -5.192486473 |
| 1422843_at   | 0.093671737  | 4.747689373 | 0.979863139  | 0.351687668 | 0.351687668 | -5.192510837 |
| 1428867_at   | -0.104599045 | 4.91062845  | -0.979806494 | 0.351714212 | 0.351714212 | -5.19255893  |
| 1449011_at   | -0.097260299 | 6.844941169 | -0.979688952 | 0.351769296 | 0.351769296 | -5.192658719 |
| 1428784_at   | 0.102539787  | 6.354623208 | 0.979485519  | 0.351864647 | 0.351864647 | -5.192831404 |

|              |              |             |              |             |             |              |
|--------------|--------------|-------------|--------------|-------------|-------------|--------------|
| 1436132_at   | -0.117190366 | 7.948930469 | -0.979477175 | 0.351868558 | 0.351868558 | -5.192838486 |
| 1416929_at   | 0.10517048   | 6.753523345 | 0.97947472   | 0.351869709 | 0.351869709 | -5.19284057  |
| 1428584_a_at | 0.080306275  | 9.388976771 | 0.979467105  | 0.351873279 | 0.351873279 | -5.192847034 |
| 1458886_at   | 0.079226494  | 4.626173601 | 0.979453783  | 0.351879524 | 0.351879524 | -5.192858341 |
| 1445017_at   | -0.080492925 | 3.722981807 | -0.979447293 | 0.351882566 | 0.351882566 | -5.192863849 |
| 1438147_at   | 0.132160152  | 7.108206493 | 0.979291896  | 0.351955418 | 0.351955418 | -5.192995736 |
| 1435986_x_at | -0.070050018 | 9.001536827 | -0.979272974 | 0.351964289 | 0.351964289 | -5.193011794 |
| 1435606_at   | 0.12180123   | 5.843183732 | 0.979240354  | 0.351979584 | 0.351979584 | -5.193039477 |
| 1436197_at   | 0.074726012  | 7.912554682 | 0.979195     | 0.352000849 | 0.352000849 | -5.193077964 |
| 1445696_x_at | -0.065324964 | 3.502780677 | -0.979194333 | 0.352001162 | 0.352001162 | -5.19307853  |
| 1444721_at   | -0.083503688 | 4.656234367 | -0.979190076 | 0.352003158 | 0.352003158 | -5.193082142 |
| 1419246_s_at | 0.078291934  | 11.89406682 | 0.979061083  | 0.352063646 | 0.352063646 | -5.193191598 |
| 1453911_at   | -0.075793301 | 4.987788542 | -0.979022781 | 0.352081608 | 0.352081608 | -5.193224096 |
| 1427227_at   | 0.063511089  | 3.402170142 | 0.978953262  | 0.352114212 | 0.352114212 | -5.19328308  |
| 1440911_at   | 0.099186287  | 9.234603454 | 0.978938771  | 0.352121008 | 0.352121008 | -5.193295374 |
| 1431025_at   | 0.070891446  | 5.211962492 | 0.978806755  | 0.352182929 | 0.352182929 | -5.193407372 |
| 1445280_at   | -0.0717618   | 5.875877075 | -0.978765802 | 0.352202139 | 0.352202139 | -5.193442113 |
| 1416688_at   | 0.281564211  | 6.320260058 | 0.978681731  | 0.352241577 | 0.352241577 | -5.193513427 |
| 1421099_at   | -0.070587081 | 4.257959896 | -0.978588831 | 0.352285161 | 0.352285161 | -5.193592225 |
| 1424854_at   | -0.186484724 | 5.877630105 | -0.978547599 | 0.352304506 | 0.352304506 | -5.193627197 |
| 1441400_at   | -0.088619945 | 5.504493078 | -0.978454508 | 0.352348186 | 0.352348186 | -5.193706149 |
| 1452255_at   | -0.071946668 | 8.95459952  | -0.978424305 | 0.352362358 | 0.352362358 | -5.193731763 |
| 1450810_at   | -0.077080441 | 4.730576622 | -0.978414886 | 0.352366778 | 0.352366778 | -5.19373975  |
| 1435750_at   | -0.125234855 | 5.043388595 | -0.978387526 | 0.352379617 | 0.352379617 | -5.193762953 |
| 1439425_x_at | 0.079770796  | 3.327791711 | 0.978273334  | 0.352433206 | 0.352433206 | -5.193859788 |
| 1437731_at   | -0.098978049 | 6.758172878 | -0.978239827 | 0.352448932 | 0.352448932 | -5.1938882   |
| 1427922_at   | -0.12111359  | 6.918940447 | -0.978186181 | 0.35247411  | 0.35247411  | -5.193933687 |
| 1425927_a_at | -0.101682619 | 7.836571925 | -0.978171234 | 0.352481126 | 0.352481126 | -5.19394636  |
| 1441907_s_at | 0.091514457  | 4.67330423  | 0.978168518  | 0.3524824   | 0.3524824   | -5.193948663 |
| 1451882_a_at | -0.071191718 | 3.479957505 | -0.978114154 | 0.352507917 | 0.352507917 | -5.193994756 |
| 1423082_at   | -0.069950245 | 8.327192607 | -0.978067685 | 0.35252973  | 0.35252973  | -5.194034155 |
| 1453037_at   | -0.06915716  | 8.192252071 | -0.978002992 | 0.352560098 | 0.352560098 | -5.194089    |
| 1445664_at   | 0.089679459  | 6.246670537 | 0.977993677  | 0.352564471 | 0.352564471 | -5.194096898 |
| 1453938_at   | -0.107294796 | 5.551831479 | -0.97798329  | 0.352569347 | 0.352569347 | -5.194105703 |
| 1422085_at   | -0.070098484 | 4.170804684 | -0.977971279 | 0.352574986 | 0.352574986 | -5.194115886 |
| 1431914_at   | -0.06741523  | 3.886879865 | -0.977951902 | 0.352584083 | 0.352584083 | -5.194132312 |
| 1459284_at   | -0.09075348  | 4.04449346  | -0.977924688 | 0.352596859 | 0.352596859 | -5.194155382 |
| 1439737_x_at | 0.089349294  | 4.259228544 | 0.977890381  | 0.352612966 | 0.352612966 | -5.194184465 |
| 1426740_s_at | 0.089338462  | 7.553802147 | 0.977868148  | 0.352623404 | 0.352623404 | -5.194203311 |
| 1433793_s_at | -0.091133818 | 6.364934528 | -0.977785202 | 0.352662349 | 0.352662349 | -5.194273621 |
| 1418087_at   | 0.066044997  | 8.842809214 | 0.977780837  | 0.352664398 | 0.352664398 | -5.19427732  |
| 1446032_at   | -0.066046571 | 3.58383864  | -0.977707636 | 0.352698771 | 0.352698771 | -5.194339365 |
| 1450324_a_at | -0.068976478 | 5.583977022 | -0.97763112  | 0.352734702 | 0.352734702 | -5.194404216 |
| 1428946_at   | -0.14143742  | 7.901808471 | -0.977593279 | 0.352752473 | 0.352752473 | -5.194436286 |
| 1420441_at   | 0.078593482  | 8.950693142 | 0.977533438  | 0.352780577 | 0.352780577 | -5.194487    |
| 1433276_at   | -0.082365757 | 6.323526287 | -0.97752907  | 0.352782628 | 0.352782628 | -5.194490701 |
| 1453598_at   | -0.169962957 | 4.630415923 | -0.977524265 | 0.352784885 | 0.352784885 | -5.194494774 |
| 1448985_at   | 0.084053993  | 7.706457208 | 0.977454907  | 0.352817461 | 0.352817461 | -5.194553549 |
| 1451624_a_at | 0.069985889  | 6.744199312 | 0.977419577  | 0.352834055 | 0.352834055 | -5.194583487 |
| 1416489_at   | 0.079853377  | 8.838667432 | 0.977418814  | 0.352834414 | 0.352834414 | -5.194584134 |
| 1416702_at   | 0.115219852  | 5.375516646 | 0.977410929  | 0.352838118 | 0.352838118 | -5.194590815 |
| 1438252_at   | -0.08065707  | 3.322305265 | -0.977368174 | 0.352858201 | 0.352858201 | -5.194627044 |
| 1415911_at   | 0.065036163  | 9.302234419 | 0.977266522  | 0.352905952 | 0.352905952 | -5.194713173 |

|              |              |             |              |             |             |              |
|--------------|--------------|-------------|--------------|-------------|-------------|--------------|
| 1439497_at   | -0.090130449 | 6.847957472 | -0.977266393 | 0.352906013 | 0.352906013 | -5.194713282 |
| 1430294_at   | 0.074332175  | 6.015517058 | 0.97725219   | 0.352912685 | 0.352912685 | -5.194725316 |
| 1428382_at   | -0.064825071 | 8.558359068 | -0.97723778  | 0.352919455 | 0.352919455 | -5.194737525 |
| 1443627_at   | -0.135564592 | 4.351616818 | -0.977160324 | 0.352955845 | 0.352955845 | -5.194803148 |
| 1427261_at   | -0.138163189 | 5.975746924 | -0.976896371 | 0.353079873 | 0.353079873 | -5.195026743 |
| 1460139_at   | -0.07848222  | 3.122659907 | -0.976892838 | 0.353081534 | 0.353081534 | -5.195029736 |
| 1455572_x_at | 0.07337691   | 13.21258331 | 0.976866889  | 0.353093729 | 0.353093729 | -5.195051715 |
| 1445454_at   | -0.105764135 | 4.148555978 | -0.976849289 | 0.353102    | 0.353102    | -5.195066621 |
| 1449571_at   | -0.121208858 | 3.560166088 | -0.976838245 | 0.35310719  | 0.35310719  | -5.195075975 |
| 1442619_at   | -0.117283527 | 5.146007199 | -0.976780944 | 0.353134122 | 0.353134122 | -5.195124507 |
| 1442776_at   | -0.058932244 | 4.464491128 | -0.976738172 | 0.353154225 | 0.353154225 | -5.195160732 |
| 1448200_at   | -0.083570539 | 8.479043811 | -0.976625787 | 0.353207052 | 0.353207052 | -5.195255906 |
| 1427108_at   | -0.06859904  | 11.14135466 | -0.976578762 | 0.353229157 | 0.353229157 | -5.195295727 |
| 1430347_at   | -0.064890542 | 6.632389655 | -0.976456304 | 0.353286728 | 0.353286728 | -5.195399419 |
| 1426299_at   | 0.071038987  | 5.343282808 | 0.976348227  | 0.353337544 | 0.353337544 | -5.195490926 |
| 1446566_at   | -0.090617116 | 6.032249033 | -0.976232868 | 0.353391789 | 0.353391789 | -5.195588589 |
| 1451819_at   | 0.137537341  | 6.829079906 | 0.976120153  | 0.353444796 | 0.353444796 | -5.195684003 |
| 1435112_a_at | 0.076164586  | 12.16446797 | 0.976111259  | 0.35344898  | 0.35344898  | -5.195691532 |
| 1426972_at   | -0.077234355 | 9.829448816 | -0.976109735 | 0.353449696 | 0.353449696 | -5.195692822 |
| 1425920_at   | 0.172359998  | 5.575256951 | 0.976014872  | 0.353494313 | 0.353494313 | -5.195773118 |
| 1456598_at   | -0.071657812 | 3.704600297 | -0.975992607 | 0.353504786 | 0.353504786 | -5.195791964 |
| 1446621_at   | -0.124474981 | 5.482406263 | -0.975990412 | 0.353505819 | 0.353505819 | -5.195793821 |
| 1438027_at   | -0.136972797 | 4.84591185  | -0.975974274 | 0.35351341  | 0.35351341  | -5.195807481 |
| 1451092_a_at | 0.071669958  | 9.038241939 | 0.975960753  | 0.353519769 | 0.353519769 | -5.195818924 |
| 1440117_at   | -0.078256543 | 4.982906483 | -0.975888688 | 0.353553669 | 0.353553669 | -5.195879916 |
| 1426179_a_at | 0.124179576  | 8.267597721 | 0.975882175  | 0.353556733 | 0.353556733 | -5.195885428 |
| 1434199_at   | -0.066372698 | 6.868079834 | -0.975873565 | 0.353560783 | 0.353560783 | -5.195892715 |
| 1460520_at   | -0.094210143 | 5.903997477 | -0.975846765 | 0.35357339  | 0.35357339  | -5.195915396 |
| 1429281_at   | 0.08265622   | 7.366038498 | 0.975809653  | 0.35359085  | 0.35359085  | -5.195946803 |
| 1421362_a_at | 0.155427369  | 6.227754458 | 0.975781368  | 0.353604157 | 0.353604157 | -5.19597074  |
| 1454449_at   | 0.101227321  | 6.358974078 | 0.975759538  | 0.353614427 | 0.353614427 | -5.195989213 |
| 1417789_at   | 0.071137195  | 3.959009064 | 0.975707376  | 0.353638968 | 0.353638968 | -5.196033353 |
| 1428473_at   | 0.070443339  | 10.2155082  | 0.975671821  | 0.353655697 | 0.353655697 | -5.196063439 |
| 1432201_a_at | 0.061999964  | 3.740299695 | 0.975592224  | 0.35369315  | 0.35369315  | -5.19613079  |
| 1428337_at   | 0.062209581  | 8.402444541 | 0.975504317  | 0.353734517 | 0.353734517 | -5.196205167 |
| 1431278_s_at | 0.076155163  | 5.29581226  | 0.975459505  | 0.353755606 | 0.353755606 | -5.19624308  |
| 1424305_at   | 0.059041368  | 3.723205749 | 0.975395986  | 0.353785499 | 0.353785499 | -5.196296817 |
| 1459685_at   | 0.098261856  | 5.380128757 | 0.975393814  | 0.353786522 | 0.353786522 | -5.196298655 |
| 1424526_a_at | 0.178499549  | 8.358269405 | 0.975377564  | 0.35379417  | 0.35379417  | -5.196312402 |
| 1430181_at   | 0.100932892  | 5.052496041 | 0.975371421  | 0.353797061 | 0.353797061 | -5.196317599 |
| 1436801_x_at | 0.092013437  | 8.655729108 | 0.975368983  | 0.353798208 | 0.353798208 | -5.196319661 |
| 1438361_at   | 0.146354933  | 4.596306803 | 0.975351922  | 0.353806238 | 0.353806238 | -5.196334094 |
| 1445802_at   | 0.092738026  | 4.063175516 | 0.975211997  | 0.3538721   | 0.3538721   | -5.196452457 |
| 1454646_at   | -0.076510469 | 7.132500684 | -0.975167191 | 0.353893192 | 0.353893192 | -5.196490356 |
| 1448661_at   | -0.089217716 | 8.195298579 | -0.975132694 | 0.353909432 | 0.353909432 | -5.196519534 |
| 1422274_at   | -0.095658504 | 4.478491749 | -0.975068509 | 0.353939649 | 0.353939649 | -5.196573821 |
| 1440502_at   | 0.105811274  | 3.681232232 | 0.974975852  | 0.353983273 | 0.353983273 | -5.196652184 |
| 1442811_at   | -0.092624397 | 6.900874289 | -0.974939639 | 0.354000324 | 0.354000324 | -5.196682809 |
| 1451434_s_at | 0.114129389  | 8.401871004 | 0.974887029  | 0.354025096 | 0.354025096 | -5.196727299 |
| 1447525_at   | 0.076348055  | 3.871845639 | 0.974749276  | 0.354089965 | 0.354089965 | -5.19684378  |
| 1435153_at   | 0.085415554  | 7.177810451 | 0.974724868  | 0.35410146  | 0.35410146  | -5.196864418 |
| 1423816_at   | -0.0946412   | 9.147925951 | -0.974698269 | 0.354113987 | 0.354113987 | -5.196886908 |
| 1443594_at   | 0.063584652  | 6.033197656 | 0.974614777  | 0.35415331  | 0.35415331  | -5.196957498 |

|                |              |             |              |             |             |              |
|----------------|--------------|-------------|--------------|-------------|-------------|--------------|
| AFFX-ThrX-3_at | 0.12046063   | 6.972444251 | 0.974578283  | 0.3541705   | 0.3541705   | -5.196988352 |
| 1457152_at     | 0.087669109  | 4.681316629 | 0.974515139  | 0.354200243 | 0.354200243 | -5.197041734 |
| 1430205_a_at   | -0.079065354 | 6.896771023 | -0.974503205 | 0.354205864 | 0.354205864 | -5.197051823 |
| 1437473_at     | -0.107196382 | 7.631737679 | -0.974436661 | 0.354237235 | 0.354237235 | -5.197108119 |
| 1458444_at     | 0.082869535  | 5.204986625 | 0.97442803   | 0.354241277 | 0.354241277 | -5.197115372 |
| 1452236_at     | 0.110577425  | 9.233106027 | 0.974422009  | 0.354244113 | 0.354244113 | -5.197120461 |
| 1450978_at     | -0.094941941 | 8.936674717 | -0.9744028   | 0.354253163 | 0.354253163 | -5.197136699 |
| 1456745_x_at   | -0.062332258 | 8.160338089 | -0.97440185  | 0.35425361  | 0.35425361  | -5.197137502 |
| 1423397_at     | 0.090686435  | 3.681202344 | 0.974356496  | 0.354274977 | 0.354274977 | -5.197175839 |
| 1444506_at     | 0.072333257  | 7.037049753 | 0.97429668   | 0.354303158 | 0.354303158 | -5.197226398 |
| 1448127_at     | 0.064916443  | 10.24947556 | 0.97424905   | 0.3543256   | 0.3543256   | -5.197266656 |
| 1419982_s_at   | -0.087853272 | 5.586833158 | -0.974245714 | 0.354327171 | 0.354327171 | -5.197269475 |
| 1429858_at     | -0.075370976 | 3.283268698 | -0.974214351 | 0.354341949 | 0.354341949 | -5.197295983 |
| 1415955_x_at   | -0.073226493 | 6.466353415 | -0.974189338 | 0.354353735 | 0.354353735 | -5.197317123 |
| 1424769_s_at   | 0.07030608   | 11.83550598 | 0.974159885  | 0.354367614 | 0.354367614 | -5.197342015 |
| 1428270_at     | -0.065955084 | 10.13254203 | -0.974132785 | 0.354380384 | 0.354380384 | -5.197364918 |
| 1445772_at     | -0.085186273 | 4.725168548 | -0.974077741 | 0.354406323 | 0.354406323 | -5.197411436 |
| 1449257_at     | 0.068092804  | 6.890571224 | 0.97407565   | 0.354407308 | 0.354407308 | -5.197413203 |
| 1450231_a_at   | 0.100841146  | 5.782250928 | 0.974053703  | 0.354417651 | 0.354417651 | -5.19743175  |
| 1418248_at     | 0.107220679  | 6.173037161 | 0.974050627  | 0.3544191   | 0.3544191   | -5.197434349 |
| 1416405_at     | -0.077610055 | 11.91209305 | -0.97398965  | 0.354447837 | 0.354447837 | -5.197485877 |
| 1419070_at     | -0.060421889 | 6.460216035 | -0.97395426  | 0.354464517 | 0.354464517 | -5.197515782 |
| 1459279_at     | -0.071888535 | 3.973014781 | -0.97394244  | 0.354470087 | 0.354470087 | -5.19752577  |
| 1431789_s_at   | -0.069754776 | 7.505910083 | -0.973935887 | 0.354473176 | 0.354473176 | -5.197531307 |
| 1430675_at     | -0.114417884 | 4.1225311   | -0.973923044 | 0.354479229 | 0.354479229 | -5.197542159 |
| 1431118_at     | -0.09518525  | 7.697726804 | -0.973912265 | 0.35448431  | 0.35448431  | -5.197551267 |
| 1417198_at     | 0.084445917  | 4.303885892 | 0.973900041  | 0.354490071 | 0.354490071 | -5.197561595 |
| 1446767_at     | 0.107619992  | 4.748753723 | 0.973887929  | 0.35449578  | 0.35449578  | -5.19757183  |
| 1447444_at     | 0.066261498  | 4.76877204  | 0.973860107  | 0.354508894 | 0.354508894 | -5.197595338 |
| 1432404_at     | -0.076338998 | 3.718225732 | -0.973859611 | 0.354509127 | 0.354509127 | -5.197595757 |
| 1430424_at     | -0.089158831 | 4.541477059 | -0.973793645 | 0.354540222 | 0.354540222 | -5.197651492 |
| 1427238_at     | -0.085685445 | 3.473664931 | -0.973753971 | 0.354558924 | 0.354558924 | -5.197685011 |
| 1423972_at     | -0.061054849 | 10.42771041 | -0.97368992  | 0.354589118 | 0.354589118 | -5.197739124 |
| 1437430_at     | -0.09175942  | 4.228205146 | -0.973591697 | 0.354635426 | 0.354635426 | -5.197822101 |
| 1444365_at     | -0.076079209 | 3.908137607 | -0.973571726 | 0.354644842 | 0.354644842 | -5.197838971 |
| 1421077_at     | -0.06850361  | 8.454785712 | -0.973556909 | 0.354651827 | 0.354651827 | -5.197851487 |
| 1421701_at     | -0.073837623 | 3.239237783 | -0.973494518 | 0.354681245 | 0.354681245 | -5.197904189 |
| 1443378_s_at   | 0.076654628  | 6.367928067 | 0.973493443  | 0.354681752 | 0.354681752 | -5.197905097 |
| 1440632_at     | 0.083559276  | 3.320594011 | 0.97344494   | 0.354704623 | 0.354704623 | -5.197946065 |
| 1417215_at     | 0.179695407  | 4.248906644 | 0.973434767  | 0.35470942  | 0.35470942  | -5.197954658 |
| 1426289_at     | 0.064197512  | 9.951325734 | 0.973432366  | 0.354710552 | 0.354710552 | -5.197956686 |
| 1446429_at     | 0.075282403  | 5.799263371 | 0.973327818  | 0.354759854 | 0.354759854 | -5.198044987 |
| 1456120_at     | 0.107284241  | 7.596918515 | 0.973271705  | 0.354786317 | 0.354786317 | -5.198092377 |
| 1438228_at     | -0.107172808 | 6.967246044 | -0.973260513 | 0.354791596 | 0.354791596 | -5.198101829 |
| 1432760_at     | 0.072684721  | 4.026252122 | 0.973256034  | 0.354793708 | 0.354793708 | -5.198105612 |
| 1435773_at     | -0.098092035 | 6.5373068   | -0.97309505  | 0.354869639 | 0.354869639 | -5.198241556 |
| 1455241_at     | 0.124361673  | 5.934108388 | 0.973040172  | 0.354895526 | 0.354895526 | -5.198287894 |
| 1416075_at     | -0.076710545 | 7.788570388 | -0.97298255  | 0.354922709 | 0.354922709 | -5.198336547 |
| 1438921_at     | 0.175812859  | 5.710643443 | 0.972979252  | 0.354924264 | 0.354924264 | -5.198339332 |
| 1453869_at     | 0.127493133  | 4.608811938 | 0.972966577  | 0.354930244 | 0.354930244 | -5.198350034 |
| 1442172_at     | 0.07574314   | 4.305244345 | 0.972948236  | 0.354938897 | 0.354938897 | -5.198365519 |
| 1440006_at     | -0.087264029 | 3.931394443 | -0.972947211 | 0.35493938  | 0.35493938  | -5.198366385 |
| 1423396_at     | -0.117619164 | 5.866149883 | -0.972739975 | 0.355037158 | 0.355037158 | -5.198541339 |

|              |              |             |              |             |             |              |
|--------------|--------------|-------------|--------------|-------------|-------------|--------------|
| 1442059_at   | -0.091562647 | 5.101752486 | -0.972608909 | 0.355099008 | 0.355099008 | -5.198651974 |
| 1443283_at   | 0.093605434  | 4.136886968 | 0.97253151   | 0.355135536 | 0.355135536 | -5.198717302 |
| 1438752_at   | -0.100232393 | 7.354028434 | -0.972483596 | 0.35515815  | 0.35515815  | -5.198757742 |
| 1448223_at   | -0.126778616 | 9.314948309 | -0.972423616 | 0.355186461 | 0.355186461 | -5.198808363 |
| 1439147_at   | -0.077759216 | 4.539706103 | -0.972423496 | 0.355186518 | 0.355186518 | -5.198808465 |
| 1459108_a_at | 0.082239993  | 8.413461468 | 0.972388757  | 0.355202916 | 0.355202916 | -5.198837782 |
| 1453867_at   | -0.110422965 | 3.95583247  | -0.972329201 | 0.355231028 | 0.355231028 | -5.19888804  |
| 1444942_at   | -0.084610056 | 6.571962276 | -0.97230289  | 0.355243449 | 0.355243449 | -5.198910244 |
| 1432333_a_at | -0.070042139 | 4.714100955 | -0.972288344 | 0.355250316 | 0.355250316 | -5.198922518 |
| 1442144_at   | 0.101395226  | 5.175591215 | 0.972241663  | 0.355272353 | 0.355272353 | -5.198961909 |
| 1433294_at   | 0.096307457  | 4.386570023 | 0.972206783  | 0.35528882  | 0.35528882  | -5.198991341 |
| 1447000_at   | 0.118807569  | 5.596497192 | 0.972199291  | 0.355292357 | 0.355292357 | -5.198997663 |
| 1436439_at   | 0.068656368  | 3.10263281  | 0.972197784  | 0.355293069 | 0.355293069 | -5.198998935 |
| 1459005_at   | 0.077522455  | 7.05858763  | 0.972123701  | 0.355328046 | 0.355328046 | -5.199061443 |
| 1437045_at   | 0.061321824  | 8.799928266 | 0.972092824  | 0.355342625 | 0.355342625 | -5.199087495 |
| 1426227_s_at | -0.116378888 | 7.979291016 | -0.972017373 | 0.355378251 | 0.355378251 | -5.199151152 |
| 1451278_a_at | 0.06127021   | 8.469387667 | 0.972009357  | 0.355382037 | 0.355382037 | -5.199157915 |
| 1457636_x_at | -0.068674349 | 6.589751051 | -0.97199654  | 0.355388089 | 0.355388089 | -5.199168728 |
| 1424160_at   | -0.08000253  | 8.492379217 | -0.971941877 | 0.355413902 | 0.355413902 | -5.199214843 |
| 1459601_at   | 0.101921367  | 3.422846245 | 0.97189746   | 0.355434878 | 0.355434878 | -5.199252313 |
| 1447473_at   | 0.081390498  | 3.93710371  | 0.97183281   | 0.35546541  | 0.35546541  | -5.199306849 |
| 1455666_at   | 0.082515535  | 5.082046476 | 0.971827006  | 0.355468151 | 0.355468151 | -5.199311745 |
| 1418420_at   | -0.34316939  | 6.598728006 | -0.971807988 | 0.355477134 | 0.355477134 | -5.199327787 |
| 1444740_at   | 0.221072276  | 4.956868734 | 0.971703576  | 0.35552645  | 0.35552645  | -5.199415857 |
| 1436614_at   | -0.109198158 | 6.015033433 | -0.971577229 | 0.355586133 | 0.355586133 | -5.199522419 |
| 1453061_at   | 0.067274721  | 7.31357502  | 0.971349087  | 0.35569392  | 0.35569392  | -5.199714807 |
| 1458910_at   | 0.079850079  | 6.797075825 | 0.971333431  | 0.355701318 | 0.355701318 | -5.199728008 |
| 1422211_a_at | 0.078462981  | 4.518762882 | 0.971300525  | 0.355716867 | 0.355716867 | -5.199755753 |
| 1416295_a_at | 0.094552124  | 6.470134207 | 0.971292717  | 0.355720556 | 0.355720556 | -5.199762337 |
| 1454557_at   | -0.107511705 | 6.546937149 | -0.971292181 | 0.355720809 | 0.355720809 | -5.199762789 |
| 1421448_at   | 0.062519613  | 8.759973437 | 0.971224263  | 0.355752904 | 0.355752904 | -5.199820053 |
| 1437024_at   | 0.097728148  | 6.653097048 | 0.971191599  | 0.35576834  | 0.35576834  | -5.199847593 |
| 1444753_at   | -0.085464396 | 6.3102879   | -0.971176721 | 0.355775372 | 0.355775372 | -5.199860136 |
| 1426437_s_at | 0.065105374  | 9.418940645 | 0.971124385  | 0.355800106 | 0.355800106 | -5.199904259 |
| 1446009_at   | -0.083226117 | 3.733743974 | -0.971120415 | 0.355801982 | 0.355801982 | -5.199907606 |
| 1444659_at   | -0.074541953 | 4.703362843 | -0.971117664 | 0.355803282 | 0.355803282 | -5.199909925 |
| 1452315_at   | 0.06875605   | 8.396315969 | 0.971098085  | 0.355812536 | 0.355812536 | -5.199926431 |
| 1424501_at   | 0.071782007  | 8.914430102 | 0.971079298  | 0.355821415 | 0.355821415 | -5.199942268 |
| 1456771_at   | 0.090411964  | 5.593848142 | 0.970983992  | 0.355866462 | 0.355866462 | -5.20002261  |
| 1447160_at   | 0.065424201  | 7.472101935 | 0.970947131  | 0.355883886 | 0.355883886 | -5.200053682 |
| 1452743_at   | -0.073996679 | 9.128057282 | -0.97084551  | 0.355931923 | 0.355931923 | -5.200139337 |
| 1457775_at   | -0.086403292 | 3.509504767 | -0.970836741 | 0.355936069 | 0.355936069 | -5.200146729 |
| 1438158_at   | -0.081315621 | 3.459234101 | -0.970793163 | 0.355956671 | 0.355956671 | -5.200183458 |
| 1442757_at   | -0.088751102 | 7.449417471 | -0.97072239  | 0.355990131 | 0.355990131 | -5.200243104 |
| 1419659_s_at | 0.067039012  | 9.978573373 | 0.970700509  | 0.356000476 | 0.356000476 | -5.200261545 |
| 1449603_at   | -0.287807344 | 3.4229881   | -0.970655088 | 0.356021952 | 0.356021952 | -5.200299823 |
| 1431107_at   | -0.107582016 | 5.313209263 | -0.970574762 | 0.356059934 | 0.356059934 | -5.200367514 |
| 1456360_at   | -0.076122026 | 7.681184502 | -0.970527084 | 0.35608248  | 0.35608248  | -5.20040769  |
| 1451989_a_at | 0.144910754  | 10.80433077 | 0.970468401  | 0.356110232 | 0.356110232 | -5.200457138 |
| 1423473_at   | 0.075938415  | 3.686743172 | 0.970454195  | 0.35611695  | 0.35611695  | -5.200469108 |
| 1441715_at   | 0.085648638  | 5.709625143 | 0.970420345  | 0.356132959 | 0.356132959 | -5.200497629 |
| 1454639_x_at | 0.077284452  | 8.733988156 | 0.970360863  | 0.356161091 | 0.356161091 | -5.200547744 |
| 1453406_a_at | 0.075599563  | 7.881387092 | 0.970334508  | 0.356173556 | 0.356173556 | -5.200569949 |



|                |              |             |              |             |             |              |
|----------------|--------------|-------------|--------------|-------------|-------------|--------------|
| 1454488_at     | -0.11283281  | 4.267699164 | -0.970297687 | 0.356190972 | 0.356190972 | -5.200600971 |
| 1455198_a_at   | -0.108213244 | 7.148056626 | -0.970241586 | 0.356217508 | 0.356217508 | -5.200648233 |
| 1431234_at     | -0.07566691  | 5.140172714 | -0.970110204 | 0.356279659 | 0.356279659 | -5.200758909 |
| 1423594_a_at   | 0.141584411  | 6.370371222 | 0.970098137  | 0.356285367 | 0.356285367 | -5.200769074 |
| 1459467_at     | -0.072128046 | 6.079105794 | -0.970067285 | 0.356299963 | 0.356299963 | -5.200795061 |
| 1419018_at     | -0.065165109 | 4.000149363 | -0.969931971 | 0.356363985 | 0.356363985 | -5.200909033 |
| 1448910_at     | -0.065511634 | 8.360164175 | -0.969864288 | 0.356396011 | 0.356396011 | -5.200966036 |
| 1437077_at     | 0.060804611  | 8.499391671 | 0.969836608  | 0.356409109 | 0.356409109 | -5.200989347 |
| 1439236_at     | 0.061636922  | 3.887925405 | 0.96981515   | 0.356419263 | 0.356419263 | -5.201007418 |
| 1460625_at     | -0.115908597 | 4.84413564  | -0.969767338 | 0.356441889 | 0.356441889 | -5.201047682 |
| 1443399_at     | -0.119095575 | 3.70534458  | -0.969731205 | 0.356458989 | 0.356458989 | -5.20107811  |
| 1417478_a_at   | 0.078522311  | 9.09076023  | 0.969645818  | 0.3564994   | 0.3564994   | -5.20115001  |
| 1433937_at     | 0.058358437  | 8.421907551 | 0.969614208  | 0.356514362 | 0.356514362 | -5.201176627 |
| 1449666_at     | -0.091268062 | 4.03106118  | -0.969586346 | 0.356527549 | 0.356527549 | -5.201200087 |
| 1416672_s_at   | 0.077445176  | 7.633225436 | 0.969492888  | 0.356571787 | 0.356571787 | -5.201278775 |
| 1459653_at     | -0.071771118 | 3.151043269 | -0.969464746 | 0.356585109 | 0.356585109 | -5.201302468 |
| 1434183_at     | -0.108050397 | 8.216703106 | -0.969411059 | 0.356610524 | 0.356610524 | -5.201347666 |
| 1428057_a_at   | 0.085576281  | 3.915736264 | 0.969387837  | 0.356621517 | 0.356621517 | -5.201367216 |
| 1430808_at     | 0.077005989  | 6.681139863 | 0.969379842  | 0.356625302 | 0.356625302 | -5.201373946 |
| 1427409_at     | -0.094032566 | 5.130732633 | -0.969264687 | 0.356679822 | 0.356679822 | -5.201470884 |
| 1429326_at     | -0.076796236 | 7.17589659  | -0.969247425 | 0.356687995 | 0.356687995 | -5.201485415 |
| 1445604_at     | 0.113979067  | 4.445019043 | 0.969223936  | 0.356699116 | 0.356699116 | -5.201505187 |
| AFFX-BioB-M_at | 0.087433542  | 8.089285298 | 0.969131911  | 0.356742691 | 0.356742691 | -5.201582645 |
| 1446154_at     | -0.078736659 | 4.972554344 | -0.969100197 | 0.356757709 | 0.356757709 | -5.201609338 |
| 1449869_at     | -0.173985352 | 4.383688485 | -0.969070089 | 0.356771967 | 0.356771967 | -5.201634678 |
| 1430786_at     | -0.248076039 | 5.55238013  | -0.969026452 | 0.356792632 | 0.356792632 | -5.201671404 |
| 1426116_at     | -0.093346302 | 3.849505162 | -0.9689278   | 0.356839354 | 0.356839354 | -5.201754426 |
| 1430923_at     | 0.073643824  | 3.33463288  | 0.968861076  | 0.356870958 | 0.356870958 | -5.201810575 |
| 1438425_at     | 0.095409031  | 5.201444662 | 0.968832896  | 0.356884305 | 0.356884305 | -5.201834288 |
| 1421906_at     | 0.097736238  | 8.066840378 | 0.968698846  | 0.356947805 | 0.356947805 | -5.201947081 |
| 1423572_at     | -0.073804852 | 8.652747343 | -0.968663453 | 0.356964572 | 0.356964572 | -5.20197686  |
| 1456567_x_at   | 0.074775556  | 10.00598036 | 0.968598395  | 0.356995395 | 0.356995395 | -5.202031595 |
| 1450028_a_at   | 0.086893937  | 9.21723674  | 0.9685448    | 0.357020787 | 0.357020787 | -5.202076684 |
| 1439055_at     | -0.088089058 | 4.188623191 | -0.968503018 | 0.357040584 | 0.357040584 | -5.202111834 |
| 1422450_at     | -0.111439733 | 8.508144587 | -0.968476211 | 0.357053286 | 0.357053286 | -5.202134385 |
| 1453409_at     | -0.109427823 | 7.179414773 | -0.968473272 | 0.357054679 | 0.357054679 | -5.202136857 |
| 1448310_at     | -0.068537354 | 7.754937299 | -0.968456321 | 0.357062711 | 0.357062711 | -5.202151116 |
| 1450975_at     | -0.073566191 | 7.671207025 | -0.968346736 | 0.35711464  | 0.35711464  | -5.202243296 |
| 1435235_at     | 0.067295319  | 8.80298532  | 0.968200944  | 0.357183735 | 0.357183735 | -5.202365919 |
| 1444269_at     | 0.091547704  | 9.417051214 | 0.968199683  | 0.357184333 | 0.357184333 | -5.20236698  |
| 1448723_at     | -0.0858139   | 3.660925061 | -0.968079589 | 0.357241256 | 0.357241256 | -5.202467979 |
| 1439897_at     | -0.098706683 | 3.588438551 | -0.968057024 | 0.357251952 | 0.357251952 | -5.202486954 |
| 1427343_at     | 0.065722716  | 5.105650659 | 0.968017852  | 0.357270521 | 0.357270521 | -5.202519894 |
| 1415973_at     | 0.073120758  | 12.37253502 | 0.967953927  | 0.357300826 | 0.357300826 | -5.202573649 |
| 1451692_at     | -0.077231921 | 7.073737527 | -0.96780717  | 0.357370405 | 0.357370405 | -5.202697043 |
| 1418763_at     | 0.070939316  | 8.983007829 | 0.967736755  | 0.357403793 | 0.357403793 | -5.202756244 |
| 1439869_at     | -0.07125699  | 5.282221381 | -0.967669398 | 0.357435733 | 0.357435733 | -5.20281287  |
| 1450462_at     | 0.09368032   | 3.80300706  | 0.96761151   | 0.357463185 | 0.357463185 | -5.202861534 |
| 1424248_at     | -0.119923724 | 5.533398804 | -0.967584589 | 0.357475952 | 0.357475952 | -5.202884165 |
| 1422270_a_at   | 0.07801863   | 6.136814701 | 0.967555002  | 0.357489984 | 0.357489984 | -5.202909035 |
| 1440111_at     | 0.071484793  | 7.367878798 | 0.967534412  | 0.357499749 | 0.357499749 | -5.202926343 |
| 1416235_at     | -0.096234699 | 9.81027865  | -0.9675296   | 0.357502031 | 0.357502031 | -5.202930388 |
| 1432646_a_at   | 0.730812715  | 6.592425602 | 0.967455072  | 0.357537379 | 0.357537379 | -5.202993032 |

|              |              |             |              |             |             |              |
|--------------|--------------|-------------|--------------|-------------|-------------|--------------|
| 1433197_at   | -0.101609778 | 4.448868158 | -0.967426391 | 0.357550983 | 0.357550983 | -5.203017138 |
| 1419121_at   | -0.097418053 | 6.127303583 | -0.967318798 | 0.357602019 | 0.357602019 | -5.203107566 |
| 1440325_at   | 0.108391372  | 6.743216122 | 0.967304472  | 0.357608815 | 0.357608815 | -5.203119607 |
| 1446914_at   | 0.153649804  | 5.522038542 | 0.967226557  | 0.357645777 | 0.357645777 | -5.203185085 |
| 1445011_at   | 0.088997851  | 3.23325106  | 0.967185496  | 0.357665258 | 0.357665258 | -5.203219591 |
| 1430382_at   | -0.082377379 | 4.876227789 | -0.96717443  | 0.357670508 | 0.357670508 | -5.20322889  |
| 1442205_at   | -0.088639505 | 4.753769381 | -0.967062492 | 0.357723618 | 0.357723618 | -5.20332295  |
| 1450220_a_at | -0.074242337 | 5.115652757 | -0.966942356 | 0.357780624 | 0.357780624 | -5.203423889 |
| 1459693_x_at | -0.062860054 | 3.614022986 | -0.966903094 | 0.357799256 | 0.357799256 | -5.203456876 |
| 1442008_at   | 0.086954361  | 4.246365548 | 0.966856994  | 0.357821134 | 0.357821134 | -5.203495605 |
| 1432253_at   | 0.087791839  | 3.732312542 | 0.966771516  | 0.357861702 | 0.357861702 | -5.203567414 |
| 1426316_at   | -0.092208835 | 6.333158381 | -0.96675549  | 0.357869309 | 0.357869309 | -5.203580876 |
| 1416132_at   | -0.070986561 | 7.758662397 | -0.966747748 | 0.357872983 | 0.357872983 | -5.20358738  |
| 1447057_at   | 0.087582368  | 6.492883991 | 0.966652052  | 0.357918406 | 0.357918406 | -5.203667764 |
| 1424368_s_at | 0.05741516   | 10.62488656 | 0.966627895  | 0.357929873 | 0.357929873 | -5.203688055 |
| 1422928_at   | 0.109665695  | 5.666364723 | 0.966509887  | 0.357985893 | 0.357985893 | -5.203787171 |
| 1458163_at   | 0.111348123  | 4.115989012 | 0.96644458   | 0.358016898 | 0.358016898 | -5.203842018 |
| 1452134_at   | -0.077996343 | 6.722572133 | -0.966424188 | 0.35802658  | 0.35802658  | -5.203859144 |
| 1437579_at   | 0.069318901  | 3.934426441 | 0.966367083  | 0.358053693 | 0.358053693 | -5.2039071   |
| 1452880_at   | -0.075384039 | 7.676551513 | -0.966326907 | 0.35807277  | 0.35807277  | -5.203940838 |
| 1433623_at   | 0.114217725  | 7.473081736 | 0.966248279  | 0.358110106 | 0.358110106 | -5.204006863 |
| 1426129_at   | -0.083837612 | 6.284850665 | -0.966222877 | 0.358122168 | 0.358122168 | -5.204028193 |
| 1457288_at   | -0.109168403 | 4.321081641 | -0.966169587 | 0.358147475 | 0.358147475 | -5.204072938 |
| 1424460_s_at | 0.073838022  | 10.08148233 | 0.966108568  | 0.358176454 | 0.358176454 | -5.20412417  |
| 1457476_at   | -0.085694488 | 3.365184069 | -0.966008202 | 0.358224123 | 0.358224123 | -5.204208433 |
| 1438151_x_at | -0.084327577 | 8.769402009 | -0.965875792 | 0.358287018 | 0.358287018 | -5.204319588 |
| 1422389_at   | -0.100614022 | 3.376910481 | -0.965858229 | 0.358295362 | 0.358295362 | -5.204334331 |
| 1459227_at   | 0.071906777  | 4.71694885  | 0.965828218  | 0.358309618 | 0.358309618 | -5.204359522 |
| 1415686_at   | 0.073224347  | 9.658501818 | 0.965745125  | 0.358349094 | 0.358349094 | -5.204429268 |
| 1417598_a_at | -0.074703732 | 10.05609532 | -0.965742821 | 0.358350189 | 0.358350189 | -5.204431201 |
| 1457546_at   | -0.075872877 | 3.788937296 | -0.965734191 | 0.358354289 | 0.358354289 | -5.204438445 |
| 1426573_at   | -0.098241106 | 6.570457867 | -0.965698255 | 0.358371363 | 0.358371363 | -5.204468607 |
| 1420276_x_at | 0.088881253  | 6.309887385 | 0.965643771  | 0.35839725  | 0.35839725  | -5.204514335 |
| 1438933_x_at | 0.093650647  | 6.673250957 | 0.96563337   | 0.358402191 | 0.358402191 | -5.204523064 |
| 1419464_at   | 0.100420467  | 7.766072606 | 0.965630169  | 0.358403712 | 0.358403712 | -5.20452575  |
| 1420958_at   | -0.106517319 | 5.113811244 | -0.965624812 | 0.358406258 | 0.358406258 | -5.204530246 |
| 1437978_at   | -0.077957698 | 3.505246362 | -0.965544855 | 0.358444251 | 0.358444251 | -5.204597348 |
| 1451679_at   | 0.090166772  | 9.157704501 | 0.965535776  | 0.358448565 | 0.358448565 | -5.204604967 |
| 1449991_at   | -0.071965155 | 3.367806152 | -0.965525451 | 0.358453472 | 0.358453472 | -5.204613633 |
| 1439319_at   | 0.117896364  | 6.401275176 | 0.96550488   | 0.358463247 | 0.358463247 | -5.204630895 |
| 1435526_at   | 0.071017475  | 8.841863456 | 0.965419522  | 0.358503812 | 0.358503812 | -5.204702523 |
| 1428444_at   | -0.145562785 | 5.482276931 | -0.965409122 | 0.358508754 | 0.358508754 | -5.204711249 |
| 1446068_at   | -0.073462734 | 6.330415097 | -0.965374797 | 0.358525067 | 0.358525067 | -5.204740051 |
| 1431495_at   | 0.065339341  | 3.623926978 | 0.965363962  | 0.358530217 | 0.358530217 | -5.204749143 |
| 1417143_at   | -0.07650174  | 9.365673571 | -0.965341111 | 0.358541077 | 0.358541077 | -5.204768316 |
| 1432657_at   | -0.084521173 | 4.352389632 | -0.965270629 | 0.358574577 | 0.358574577 | -5.204827453 |
| 1460368_at   | 0.089349549  | 3.764120697 | 0.965235518  | 0.358591266 | 0.358591266 | -5.204856911 |
| 1428243_at   | -0.06970301  | 7.035551485 | -0.965112354 | 0.358649814 | 0.358649814 | -5.204960239 |
| 1427586_at   | -0.075710584 | 4.317634701 | -0.965098959 | 0.358656182 | 0.358656182 | -5.204971476 |
| 1420906_at   | 0.126016524  | 7.133682173 | 0.965095763  | 0.358657701 | 0.358657701 | -5.204974158 |
| 1432602_at   | -0.100876268 | 5.099312321 | -0.965095454 | 0.358657848 | 0.358657848 | -5.204974416 |
| 1450472_s_at | -0.131506955 | 6.643514658 | -0.965090919 | 0.358660004 | 0.358660004 | -5.204978221 |
| 1422788_at   | 0.088064903  | 7.940802348 | 0.965030604  | 0.358688679 | 0.358688679 | -5.205028817 |

|              |              |             |              |             |             |              |
|--------------|--------------|-------------|--------------|-------------|-------------|--------------|
| 1448667_x_at | -0.097855969 | 9.23018185  | -0.964990532 | 0.35870773  | 0.35870773  | -5.205062431 |
| 1438156_x_at | 0.095457741  | 3.764591985 | 0.964901421  | 0.3587501   | 0.3587501   | -5.205137176 |
| 1428831_at   | 0.067681018  | 8.922041077 | 0.964868992  | 0.358765519 | 0.358765519 | -5.205164376 |
| 1448335_s_at | -0.086497736 | 9.283336282 | -0.964861049 | 0.358769296 | 0.358769296 | -5.205171038 |
| 1459748_at   | -0.092380906 | 3.642673412 | -0.964791334 | 0.358802447 | 0.358802447 | -5.205229508 |
| 1419747_at   | -0.132810535 | 4.146864404 | -0.96477125  | 0.358811998 | 0.358811998 | -5.205246352 |
| 1443989_at   | -0.061778235 | 3.249933328 | -0.964682821 | 0.358854052 | 0.358854052 | -5.205320511 |
| 1458114_at   | 0.074746464  | 3.654082033 | 0.964664907  | 0.358862572 | 0.358862572 | -5.205335535 |
| 1417763_at   | -0.075495474 | 11.7233237  | -0.964627106 | 0.35888055  | 0.35888055  | -5.205367234 |
| 1438433_at   | 0.104452123  | 3.57965855  | 0.964478466  | 0.35895125  | 0.35895125  | -5.205491871 |
| 1426952_at   | -0.077027972 | 7.095426568 | -0.964478178 | 0.358951387 | 0.358951387 | -5.205492112 |
| 1417022_at   | -0.065685639 | 5.412891091 | -0.964442605 | 0.358968309 | 0.358968309 | -5.205521938 |
| 1434120_a_at | 0.07297902   | 11.19193176 | 0.964346799  | 0.359013886 | 0.359013886 | -5.205602263 |
| 1442472_at   | -0.230799605 | 4.950869554 | -0.964346518 | 0.359014019 | 0.359014019 | -5.205602498 |
| 1443725_at   | -0.106761827 | 4.042125276 | -0.964270504 | 0.359050184 | 0.359050184 | -5.205666224 |
| 1419759_at   | 0.060115897  | 3.691193331 | 0.96426307   | 0.359053721 | 0.359053721 | -5.205672456 |
| 1457945_at   | 0.983129179  | 5.402820806 | 0.96418889   | 0.359089015 | 0.359089015 | -5.205734641 |
| 1449580_s_at | 0.0971446    | 5.555163701 | 0.964163784  | 0.359100961 | 0.359100961 | -5.205755686 |
| 1416506_at   | 0.063537211  | 11.31410551 | 0.963954198  | 0.359200698 | 0.359200698 | -5.205931356 |
| 1449975_a_at | -0.09649201  | 4.957237991 | -0.963900528 | 0.359226242 | 0.359226242 | -5.205976335 |
| 1419474_a_at | 0.174581872  | 5.331776859 | 0.963832973  | 0.359258395 | 0.359258395 | -5.206032949 |
| 1455006_at   | 0.072408389  | 9.707857985 | 0.963747979  | 0.359298852 | 0.359298852 | -5.206104173 |
| 1459410_at   | 0.072730102  | 3.535300651 | 0.963736511  | 0.359304312 | 0.359304312 | -5.206113783 |
| 1439480_at   | -0.131133612 | 4.109759616 | -0.963672508 | 0.35933478  | 0.35933478  | -5.206167413 |
| 1456029_a_at | 0.090269591  | 5.969161994 | 0.963666467  | 0.359337655 | 0.359337655 | -5.206172474 |
| 1447818_x_at | 0.081416546  | 6.047481705 | 0.963580757  | 0.35937846  | 0.35937846  | -5.206244289 |
| 1457661_at   | -0.088632137 | 3.458482404 | -0.963551726 | 0.359392282 | 0.359392282 | -5.206268612 |
| 1438251_x_at | -0.185752998 | 8.88299282  | -0.963546751 | 0.35939465  | 0.35939465  | -5.20627278  |
| 1417550_a_at | -0.102560728 | 3.870076153 | -0.963510423 | 0.359411947 | 0.359411947 | -5.206303216 |
| 1426203_at   | 0.075104892  | 4.273549949 | 0.963504462  | 0.359414785 | 0.359414785 | -5.20630821  |
| 1436010_at   | -0.13071176  | 5.534833957 | -0.963452886 | 0.359439342 | 0.359439342 | -5.206351419 |
| 1435067_at   | -0.101760911 | 8.825806491 | -0.963429494 | 0.359450481 | 0.359450481 | -5.206371016 |
| 1436558_at   | -0.07219651  | 7.42882939  | -0.963362651 | 0.35948231  | 0.35948231  | -5.206427011 |
| 1447830_s_at | 0.165575243  | 8.114366951 | 0.963275665  | 0.359523735 | 0.359523735 | -5.206499876 |
| 1446191_at   | 0.074850023  | 3.582070542 | 0.963157682  | 0.359579926 | 0.359579926 | -5.206598697 |
| 1434362_at   | -0.085699791 | 7.771200651 | -0.96309582  | 0.359609391 | 0.359609391 | -5.206650508 |
| 1429852_at   | -0.195841886 | 5.660664065 | -0.962917739 | 0.359694222 | 0.359694222 | -5.206799641 |
| 1446363_at   | 0.07625251   | 4.037147278 | 0.962911859  | 0.359697023 | 0.359697023 | -5.206804565 |
| 1424157_at   | -0.084630343 | 8.363776242 | -0.962810814 | 0.359745164 | 0.359745164 | -5.206889174 |
| 1452294_at   | 0.080332498  | 4.608468155 | 0.962794338  | 0.359753014 | 0.359753014 | -5.206902971 |
| 1459560_at   | 0.126004644  | 7.012652348 | 0.962768633  | 0.359765261 | 0.359765261 | -5.206924493 |
| 1427547_a_at | 0.08232508   | 3.779215202 | 0.962728835  | 0.359784225 | 0.359784225 | -5.206957815 |
| 1448582_at   | 0.06374253   | 9.093310101 | 0.962700514  | 0.359797719 | 0.359797719 | -5.206981526 |
| 1454368_at   | -0.086202636 | 3.868313988 | -0.962691855 | 0.359801845 | 0.359801845 | -5.206988775 |
| 1438403_s_at | 0.306710487  | 11.84437616 | 0.962652088  | 0.359820795 | 0.359820795 | -5.207022069 |
| 1437236_a_at | -0.116961947 | 7.776616581 | -0.962519916 | 0.359883782 | 0.359883782 | -5.207132718 |
| 1427896_at   | 0.066673297  | 9.410160147 | 0.962464646  | 0.359910124 | 0.359910124 | -5.207178983 |
| 1424812_at   | -0.103584764 | 7.823644182 | -0.962427006 | 0.359928064 | 0.359928064 | -5.207210491 |
| 1416866_at   | -0.065229884 | 8.640527832 | -0.962395759 | 0.359942958 | 0.359942958 | -5.207236645 |
| 1420934_a_at | -0.097470342 | 8.155854291 | -0.962315204 | 0.359981355 | 0.359981355 | -5.207304069 |
| 1423138_at   | 0.089589012  | 7.50871717  | 0.962290703  | 0.359993034 | 0.359993034 | -5.207324575 |
| 1435496_at   | -0.06715939  | 4.002387028 | -0.962242511 | 0.360016007 | 0.360016007 | -5.207364909 |
| 1460150_at   | -0.059929301 | 3.631450757 | -0.962157718 | 0.360056431 | 0.360056431 | -5.207435872 |

|                  |              |             |              |             |             |              |
|------------------|--------------|-------------|--------------|-------------|-------------|--------------|
| 1419119_at       | -0.108163399 | 5.150064712 | -0.962122663 | 0.360073144 | 0.360073144 | -5.207465206 |
| 1459170_at       | -0.092838756 | 4.224852132 | -0.962080849 | 0.36009308  | 0.36009308  | -5.207500197 |
| 1448288_at       | 0.098389066  | 10.90713259 | 0.962066188  | 0.360100071 | 0.360100071 | -5.207512466 |
| 1438483_at       | -0.073775745 | 5.727109814 | -0.962033136 | 0.36011583  | 0.36011583  | -5.207540123 |
| 1449665_at       | -0.064234062 | 3.957160129 | -0.961971688 | 0.36014513  | 0.36014513  | -5.20759154  |
| 1457179_at       | -0.068066359 | 3.242723144 | -0.961860816 | 0.360198001 | 0.360198001 | -5.207684305 |
| 1432232_at       | 0.088139688  | 6.442138294 | 0.96185607   | 0.360200264 | 0.360200264 | -5.207688276 |
| 1455433_at       | 0.137764944  | 7.361626816 | 0.961844211  | 0.360205919 | 0.360205919 | -5.207698198 |
| 1448782_at       | 0.077738295  | 7.834065036 | 0.961764273  | 0.360244043 | 0.360244043 | -5.207765075 |
| 1420901_a_at     | -0.083046866 | 7.412319842 | -0.961740279 | 0.360255487 | 0.360255487 | -5.207785148 |
| 1424876_s_at     | -0.081108635 | 8.780311979 | -0.961610653 | 0.360317316 | 0.360317316 | -5.207893584 |
| 1439692_at       | -0.092307265 | 3.977675097 | -0.961510816 | 0.360364941 | 0.360364941 | -5.207977091 |
| 1455252_at       | 0.082416174  | 8.227159964 | 0.961484156  | 0.360377659 | 0.360377659 | -5.207999389 |
| 1452812_at       | -0.086727605 | 9.370593968 | -0.961306044 | 0.360462637 | 0.360462637 | -5.20814835  |
| 1434545_x_at     | 0.063295382  | 8.966548728 | 0.961230408  | 0.360498728 | 0.360498728 | -5.2082116   |
| 1452798_s_at     | -0.070318436 | 7.591308342 | -0.961153632 | 0.360535366 | 0.360535366 | -5.208275799 |
| 1457364_at       | -0.101694054 | 5.097866486 | -0.961028241 | 0.360595208 | 0.360595208 | -5.208380641 |
| 1434610_at       | -0.096047493 | 8.371444505 | -0.961015304 | 0.360601383 | 0.360601383 | -5.208391458 |
| 1452859_at       | -0.07686625  | 7.863959443 | -0.960960525 | 0.360627529 | 0.360627529 | -5.208437255 |
| 1431702_at       | -0.093646941 | 3.906851931 | -0.960931921 | 0.360641182 | 0.360641182 | -5.208461169 |
| 1429436_at       | 0.119754497  | 7.073655923 | 0.960916767  | 0.360648415 | 0.360648415 | -5.208473838 |
| 1440370_at       | -0.068942044 | 3.629885176 | -0.96088277  | 0.360664643 | 0.360664643 | -5.208502259 |
| 1447480_at       | -0.124166556 | 4.56955802  | -0.960874962 | 0.36066837  | 0.36066837  | -5.208508786 |
| 1442322_at       | 0.120895398  | 8.610682385 | 0.960850779  | 0.360679914 | 0.360679914 | -5.208529002 |
| 1460521_a_at     | -0.05945108  | 3.949766921 | -0.96076087  | 0.360722835 | 0.360722835 | -5.208604159 |
| 1433003_at       | -0.08093105  | 4.170829795 | -0.960744145 | 0.360730819 | 0.360730819 | -5.208618139 |
| 1460557_at       | 0.062973468  | 8.607422006 | 0.960739795  | 0.360732896 | 0.360732896 | -5.208621775 |
| AFFX-18SRNAMur/X | 0.248155702  | 8.11682206  | 0.960736714  | 0.360734367 | 0.360734367 | -5.20862435  |
| 1442809_at       | 0.092587871  | 3.301337337 | 0.960692628  | 0.360755414 | 0.360755414 | -5.2086612   |
| 1460026_s_at     | -0.08000622  | 7.182354271 | -0.960641899 | 0.360779634 | 0.360779634 | -5.2087036   |
| 1453160_at       | -0.074667024 | 9.378030479 | -0.960558761 | 0.360819331 | 0.360819331 | -5.208773085 |
| 1430932_at       | 0.107293724  | 5.180299012 | 0.960477514  | 0.360858127 | 0.360858127 | -5.208840985 |
| 1426944_at       | -0.125294841 | 8.99249365  | -0.960385045 | 0.360902286 | 0.360902286 | -5.208918258 |
| 1459417_at       | 0.064492585  | 6.148223065 | 0.960340091  | 0.360923755 | 0.360923755 | -5.208955823 |
| 1415763_a_at     | -0.084050269 | 9.909035197 | -0.960317375 | 0.360934604 | 0.360934604 | -5.208974803 |
| 1442009_at       | -0.092741991 | 5.931459905 | -0.960314839 | 0.360935815 | 0.360935815 | -5.208976923 |
| 1460527_at       | -0.076576116 | 3.811564633 | -0.960298138 | 0.360943792 | 0.360943792 | -5.208990877 |
| 1435266_at       | 0.157824239  | 8.600253701 | 0.960286773  | 0.36094922  | 0.36094922  | -5.209000374 |
| 1434570_at       | 0.077889491  | 8.27836298  | 0.960276953  | 0.36095391  | 0.36095391  | -5.209008579 |
| 1451576_at       | -0.068494778 | 7.838235041 | -0.960271419 | 0.360956553 | 0.360956553 | -5.209013203 |
| 1433782_at       | 0.092889723  | 7.517454648 | 0.959953569  | 0.36110839  | 0.36110839  | -5.209278747 |
| 1441397_at       | 0.100400772  | 6.949644307 | 0.959939406  | 0.361115157 | 0.361115157 | -5.209290578 |
| 1458296_at       | 0.091533568  | 8.622150971 | 0.959921677  | 0.361123627 | 0.361123627 | -5.209305387 |
| 1432580_at       | -0.113627006 | 4.191011781 | -0.959888514 | 0.361139472 | 0.361139472 | -5.209333088 |
| 1427275_at       | 0.133883496  | 10.39032516 | 0.959853977  | 0.361155974 | 0.361155974 | -5.209361936 |
| 1460085_at       | 0.083831956  | 6.249496807 | 0.959702418  | 0.361228398 | 0.361228398 | -5.20948852  |
| 1456888_at       | 0.07670564   | 7.454810791 | 0.959658295  | 0.361249484 | 0.361249484 | -5.209525369 |
| 1416355_at       | 0.081700712  | 7.97733266  | 0.959570025  | 0.36129167  | 0.36129167  | -5.209599082 |
| 1430237_at       | -0.071841527 | 6.060064386 | -0.959527565 | 0.361311965 | 0.361311965 | -5.209634539 |
| 1445524_at       | -0.076743748 | 3.895031558 | -0.959435452 | 0.361355994 | 0.361355994 | -5.209711454 |
| 1416988_at       | 0.066200434  | 9.431364168 | 0.959365693  | 0.361389341 | 0.361389341 | -5.209769698 |
| 1426318_at       | 0.070008225  | 4.022428414 | 0.959318026  | 0.361412128 | 0.361412128 | -5.209809496 |
| 1448930_at       | 0.088021113  | 6.083714296 | 0.959297249  | 0.361422061 | 0.361422061 | -5.209826842 |

|              |              |             |              |             |             |              |
|--------------|--------------|-------------|--------------|-------------|-------------|--------------|
| 1416796_at   | 0.073584606  | 8.565727585 | 0.959207559  | 0.361464941 | 0.361464941 | -5.209901719 |
| 1426757_at   | -0.099032309 | 7.830084006 | -0.959129383 | 0.36150232  | 0.36150232  | -5.20996698  |
| 1447771_at   | 0.12919997   | 8.146792696 | 0.959031479  | 0.361549135 | 0.361549135 | -5.210048702 |
| 1416091_at   | -0.111320627 | 8.825090479 | -0.958924618 | 0.361600239 | 0.361600239 | -5.210137894 |
| 1423670_a_at | -0.065565682 | 10.50669487 | -0.958912659 | 0.361605958 | 0.361605958 | -5.210147875 |
| 1415725_at   | 0.061408528  | 7.923410469 | 0.958897907  | 0.361613013 | 0.361613013 | -5.210160187 |
| 1425031_at   | 0.072084265  | 6.93003447  | 0.958814232  | 0.361653034 | 0.361653034 | -5.21023002  |
| 1448569_at   | -0.093791786 | 10.51260213 | -0.958605555 | 0.361752854 | 0.361752854 | -5.210404154 |
| 1455093_a_at | -0.10719861  | 4.727771593 | -0.958600366 | 0.361755336 | 0.361755336 | -5.210408484 |
| 1457159_at   | -0.115434091 | 4.408441227 | -0.958585884 | 0.361762264 | 0.361762264 | -5.210420567 |
| 1449366_at   | 0.096152826  | 4.199636656 | 0.958540823  | 0.361783822 | 0.361783822 | -5.210458165 |
| 1453855_at   | 0.137429379  | 4.910794936 | 0.958535653  | 0.361786295 | 0.361786295 | -5.210462478 |
| 1458436_at   | 0.076512613  | 5.834665251 | 0.958480693  | 0.361812591 | 0.361812591 | -5.210508333 |
| 1459383_at   | 0.116548648  | 4.756641902 | 0.958442895  | 0.361830675 | 0.361830675 | -5.210539867 |
| 1440809_at   | -0.074670619 | 6.14723925  | -0.95842726  | 0.361838156 | 0.361838156 | -5.210552912 |
| 1447293_x_at | 0.092917073  | 3.917315729 | 0.95840541   | 0.361848611 | 0.361848611 | -5.21057114  |
| 1443387_at   | 0.125658754  | 4.23888164  | 0.958396262  | 0.361852988 | 0.361852988 | -5.210578772 |
| 1442788_at   | 0.088403806  | 3.746497624 | 0.958352482  | 0.361873937 | 0.361873937 | -5.210615294 |
| 1447545_at   | 0.096891243  | 3.362103595 | 0.958217666  | 0.361938452 | 0.361938452 | -5.210727754 |
| 1433061_at   | -0.0697443   | 4.744388133 | -0.958211393 | 0.361941454 | 0.361941454 | -5.210732987 |
| 1452795_at   | 0.065291967  | 9.667451759 | 0.958198429  | 0.361947659 | 0.361947659 | -5.2107438   |
| 1448734_at   | -0.082420587 | 3.502867003 | -0.958095974 | 0.361996695 | 0.361996695 | -5.210829256 |
| 1430150_at   | 0.110861017  | 4.916996843 | 0.958073788  | 0.362007313 | 0.362007313 | -5.210847759 |
| 1441419_at   | -0.068232817 | 3.686955859 | -0.958015092 | 0.362035409 | 0.362035409 | -5.210896712 |
| 1452527_a_at | -0.090832724 | 6.301152339 | -0.957956815 | 0.362063305 | 0.362063305 | -5.210945313 |
| 1444431_at   | 0.069378262  | 6.101883089 | 0.957856088  | 0.362111524 | 0.362111524 | -5.21102931  |
| 1431088_at   | -0.104247489 | 6.226088795 | -0.957837109 | 0.362120611 | 0.362120611 | -5.211045136 |
| 1452943_at   | -0.077506369 | 5.445225503 | -0.957834737 | 0.362121747 | 0.362121747 | -5.211047115 |
| 1456772_at   | -0.128419972 | 6.78141383  | -0.957834716 | 0.362121757 | 0.362121757 | -5.211047132 |
| 1438998_at   | 0.137114321  | 4.093544918 | 0.957788687  | 0.362143793 | 0.362143793 | -5.211085513 |
| 1417932_at   | -0.148142499 | 7.691332135 | -0.957707905 | 0.362182471 | 0.362182471 | -5.211152869 |
| 1422434_a_at | -0.068899895 | 3.279150565 | -0.957658865 | 0.362205953 | 0.362205953 | -5.211193756 |
| 1432750_at   | -0.091168625 | 9.090453161 | -0.957587333 | 0.362240205 | 0.362240205 | -5.211253393 |
| 1446533_at   | -0.092749663 | 4.818813024 | -0.957542295 | 0.362261773 | 0.362261773 | -5.21129094  |
| 1439553_s_at | -0.060995921 | 10.28191085 | -0.957466113 | 0.362298257 | 0.362298257 | -5.211354447 |
| 1450200_s_at | 0.06716924   | 6.742470178 | 0.95745328   | 0.362304403 | 0.362304403 | -5.211365146 |
| 1442443_at   | 0.076373807  | 6.853042738 | 0.957442702  | 0.362309469 | 0.362309469 | -5.211373963 |
| 1417685_at   | 0.062481356  | 8.870588389 | 0.957354812  | 0.362351564 | 0.362351564 | -5.211447224 |
| 1424933_at   | -0.148287695 | 5.945995964 | -0.957328828 | 0.36236401  | 0.36236401  | -5.211468882 |
| 1436648_at   | -0.061858687 | 3.618617961 | -0.957324209 | 0.362366223 | 0.362366223 | -5.211472733 |
| 1433682_at   | -0.080512835 | 8.485954508 | -0.957305849 | 0.362375017 | 0.362375017 | -5.211488035 |
| 1447419_at   | -0.091503962 | 3.618010555 | -0.957255665 | 0.362399056 | 0.362399056 | -5.211529863 |
| 1455633_at   | 0.095860405  | 9.444850719 | 0.957217854  | 0.362417168 | 0.362417168 | -5.211561375 |
| 1455213_at   | 0.08305081   | 8.819361014 | 0.95719546   | 0.362427896 | 0.362427896 | -5.21158004  |
| 1422390_at   | -0.082061244 | 3.224223822 | -0.95717184  | 0.362439211 | 0.362439211 | -5.211599724 |
| 1436310_at   | 0.096894912  | 8.358929208 | 0.957158073  | 0.362445806 | 0.362445806 | -5.211611198 |
| 1447034_at   | 0.06823649   | 7.95354524  | 0.957144823  | 0.362452154 | 0.362452154 | -5.21162224  |
| 1430765_at   | 0.067818392  | 4.244870311 | 0.957139231  | 0.362454833 | 0.362454833 | -5.211626901 |
| 1437014_x_at | 0.107441211  | 9.046283892 | 0.956913404  | 0.362563032 | 0.362563032 | -5.211815082 |
| 1420967_at   | 0.076710058  | 8.311769644 | 0.956893278  | 0.362572676 | 0.362572676 | -5.211831851 |
| 1447450_at   | -0.061312462 | 7.776292798 | -0.95686584  | 0.362585824 | 0.362585824 | -5.211854712 |
| 1431753_x_at | -0.086462424 | 7.159586296 | -0.956833263 | 0.362601435 | 0.362601435 | -5.211881854 |
| 1454840_at   | -0.068642542 | 8.056073726 | -0.956824009 | 0.36260587  | 0.36260587  | -5.211889564 |

|              |              |             |              |             |             |              |
|--------------|--------------|-------------|--------------|-------------|-------------|--------------|
| 1434028_at   | 0.097410536  | 8.112850036 | 0.956797212  | 0.362618712 | 0.362618712 | -5.211911891 |
| 1423866_at   | 0.067444449  | 3.596067196 | 0.956737896  | 0.362647139 | 0.362647139 | -5.211961307 |
| 1420424_at   | 0.079239112  | 4.138004645 | 0.956733393  | 0.362649297 | 0.362649297 | -5.211965059 |
| 1458150_at   | 0.100139895  | 5.614053086 | 0.956710002  | 0.362660507 | 0.362660507 | -5.211984545 |
| 1450036_at   | -0.083439062 | 8.027131195 | -0.956688254 | 0.362670931 | 0.362670931 | -5.212002663 |
| 1421618_at   | -0.079774562 | 5.609018475 | -0.956568839 | 0.362728168 | 0.362728168 | -5.212102139 |
| 1438520_at   | 0.096554268  | 7.243558126 | 0.956563611  | 0.362730674 | 0.362730674 | -5.212106494 |
| 1459190_at   | 0.091950253  | 5.05371963  | 0.956563245  | 0.362730849 | 0.362730849 | -5.212106798 |
| 1449946_a_at | 0.086583257  | 5.573441283 | 0.956549875  | 0.362737258 | 0.362737258 | -5.212117935 |
| 1460679_at   | 0.066336776  | 7.855341909 | 0.956539898  | 0.36274204  | 0.36274204  | -5.212126245 |
| 1418553_at   | 0.077815207  | 8.356096184 | 0.95651257   | 0.36275514  | 0.36275514  | -5.212149009 |
| 1434726_at   | -0.111107764 | 4.314309301 | -0.956409989 | 0.362804316 | 0.362804316 | -5.212234448 |
| 1424999_at   | -0.081938855 | 6.109559792 | -0.956340934 | 0.362837423 | 0.362837423 | -5.212291961 |
| 1446354_at   | -0.092082121 | 4.262429051 | -0.956083453 | 0.362960885 | 0.362960885 | -5.212506373 |
| 1432405_a_at | -0.096399404 | 3.125476452 | -0.956063557 | 0.362970426 | 0.362970426 | -5.212522939 |
| 1457205_at   | -0.11922049  | 6.187759052 | -0.956048187 | 0.362977798 | 0.362977798 | -5.212535737 |
| 1438284_at   | 0.075685823  | 7.132537074 | 0.955978566  | 0.363011187 | 0.363011187 | -5.212593702 |
| 1424123_at   | -0.09321634  | 5.787251112 | -0.955961788 | 0.363019234 | 0.363019234 | -5.212607672 |
| 1459532_at   | -0.083895682 | 3.470628843 | -0.95589163  | 0.363052884 | 0.363052884 | -5.21266608  |
| 1441236_at   | 0.072832269  | 3.803637675 | 0.955840162  | 0.363077572 | 0.363077572 | -5.212708927 |
| 1435313_at   | -0.062299494 | 3.101212356 | -0.955820087 | 0.363087201 | 0.363087201 | -5.212725639 |
| 1438236_at   | 0.086368126  | 7.574298208 | 0.9558153    | 0.363089497 | 0.363089497 | -5.212729623 |
| 1433176_at   | -0.086762733 | 3.803184233 | -0.955788127 | 0.363102532 | 0.363102532 | -5.212752244 |
| 1446940_at   | -0.151813552 | 5.241944203 | -0.955757229 | 0.363117354 | 0.363117354 | -5.212777964 |
| 1459671_at   | -0.070895544 | 3.696322897 | -0.955639678 | 0.363173748 | 0.363173748 | -5.212875811 |
| 1425653_at   | 0.072493688  | 4.915332482 | 0.955625722  | 0.363180444 | 0.363180444 | -5.212887427 |
| 1456514_at   | -0.060810824 | 8.296194371 | -0.955565938 | 0.363209127 | 0.363209127 | -5.212937185 |
| 1416903_at   | -0.072453001 | 9.811028531 | -0.955551631 | 0.363215992 | 0.363215992 | -5.212949092 |
| 1442400_at   | -0.112117472 | 6.809707029 | -0.955446279 | 0.363266543 | 0.363266543 | -5.21303677  |
| 1454734_at   | 0.252313654  | 6.423376833 | 0.955379899  | 0.363298397 | 0.363298397 | -5.21309201  |
| 1427435_at   | 0.094668947  | 5.155234497 | 0.955341969  | 0.363316599 | 0.363316599 | -5.213123572 |
| 1436315_at   | -0.069944416 | 9.453212239 | -0.95532808  | 0.363323264 | 0.363323264 | -5.21313513  |
| 1432368_at   | 0.071956798  | 4.032675728 | 0.955299641  | 0.363336913 | 0.363336913 | -5.213158794 |
| 1418691_at   | -0.079523675 | 7.215534582 | -0.955250273 | 0.363360606 | 0.363360606 | -5.213199872 |
| 1456969_at   | 0.105576466  | 3.443126485 | 0.955245868  | 0.363362721 | 0.363362721 | -5.213203538 |
| 1446109_at   | 0.05991581   | 5.663282543 | 0.955214446  | 0.363377802 | 0.363377802 | -5.213229682 |
| 1458848_at   | -0.108102655 | 5.083369553 | -0.955141546 | 0.363412792 | 0.363412792 | -5.213290336 |
| 1425648_at   | -0.0730359   | 5.985657914 | -0.955113865 | 0.363426079 | 0.363426079 | -5.213313366 |
| 1422682_s_at | -0.071629431 | 3.636113266 | -0.955064036 | 0.363449998 | 0.363449998 | -5.213354821 |
| 1441563_at   | 0.081862005  | 4.332868647 | 0.955060692  | 0.363451603 | 0.363451603 | -5.213357603 |
| 1457597_at   | -0.09687557  | 3.65699327  | -0.95504284  | 0.363460173 | 0.363460173 | -5.213372455 |
| 1459882_at   | 0.102191915  | 4.284583854 | 0.954926678  | 0.363515939 | 0.363515939 | -5.213469087 |
| 1445338_at   | -0.078727533 | 7.007508158 | -0.95488144  | 0.363537658 | 0.363537658 | -5.213506717 |
| 1418092_s_at | -0.079132754 | 8.199506427 | -0.954853741 | 0.363550957 | 0.363550957 | -5.213529757 |
| 1460346_at   | 0.085712347  | 8.625292487 | 0.954796811  | 0.363578291 | 0.363578291 | -5.21357711  |
| 1445359_at   | -0.079921052 | 4.381865705 | -0.954769306 | 0.363591498 | 0.363591498 | -5.213599987 |
| 1444980_at   | 0.07901316   | 3.963954772 | 0.954759147  | 0.363596376 | 0.363596376 | -5.213608436 |
| 1420650_at   | 0.146566718  | 7.252492871 | 0.954742869  | 0.363604192 | 0.363604192 | -5.213621974 |
| 1436765_at   | 0.073592867  | 6.599569162 | 0.954695805  | 0.363626792 | 0.363626792 | -5.213661117 |
| 1424823_s_at | -0.090872355 | 4.470260131 | -0.954678783 | 0.363634966 | 0.363634966 | -5.213675274 |
| 1440470_at   | 0.102157414  | 4.747828547 | 0.954674435  | 0.363637054 | 0.363637054 | -5.21367889  |
| 1458647_at   | 0.065750079  | 3.412242503 | 0.954664836  | 0.363641664 | 0.363641664 | -5.213686874 |
| 1453184_at   | -0.088690047 | 5.978336429 | -0.954623423 | 0.363661552 | 0.363661552 | -5.213721314 |

|              |              |             |              |             |             |              |
|--------------|--------------|-------------|--------------|-------------|-------------|--------------|
| 1416122_at   | 0.0633324    | 12.46161197 | 0.954543221  | 0.363700069 | 0.363700069 | -5.213788009 |
| 1432419_a_at | 0.066778825  | 7.462480238 | 0.954504286  | 0.363718769 | 0.363718769 | -5.213820386 |
| 1457709_a_at | 0.068738925  | 6.552711798 | 0.95447508   | 0.363732796 | 0.363732796 | -5.213844672 |
| 1447550_at   | -0.064906643 | 4.548741979 | -0.954377168 | 0.363779826 | 0.363779826 | -5.213926085 |
| 1458601_at   | 0.084454697  | 7.102818025 | 0.954343456  | 0.36379602  | 0.36379602  | -5.213954114 |
| 1440592_at   | 0.104074139  | 3.686240906 | 0.954309925  | 0.363812127 | 0.363812127 | -5.213981993 |
| 1443620_at   | 0.0840146    | 5.974929103 | 0.954276423  | 0.363828221 | 0.363828221 | -5.214009846 |
| 1445150_at   | 0.105572308  | 4.07310333  | 0.954266504  | 0.363832986 | 0.363832986 | -5.214018093 |
| 1447015_at   | -0.107462723 | 4.069961389 | -0.954195059 | 0.36386731  | 0.36386731  | -5.214077489 |
| 1421013_at   | 0.071395698  | 8.439614768 | 0.954192229  | 0.363868669 | 0.363868669 | -5.214079842 |
| 1430165_at   | -0.081170288 | 5.730280825 | -0.954183979 | 0.363872633 | 0.363872633 | -5.214086699 |
| 1454833_at   | -0.114299263 | 5.023684865 | -0.95414382  | 0.363891927 | 0.363891927 | -5.214120084 |
| 1428550_at   | -0.091840262 | 7.215919313 | -0.954134089 | 0.363896603 | 0.363896603 | -5.214128174 |
| 1448488_at   | -0.074628497 | 7.878838985 | -0.954064628 | 0.363929977 | 0.363929977 | -5.214185913 |
| 1434702_at   | -0.067515874 | 8.843534083 | -0.954035291 | 0.363944074 | 0.363944074 | -5.2142103   |
| 1439243_x_at | 0.082081443  | 3.396404909 | 0.954033032  | 0.363945159 | 0.363945159 | -5.214212177 |
| 1439016_x_at | -0.078153524 | 7.03208931  | -0.953993546 | 0.363964133 | 0.363964133 | -5.214244997 |
| 1429450_at   | -0.059920895 | 3.725192058 | -0.953986457 | 0.363967539 | 0.363967539 | -5.21425089  |
| 1457836_at   | -0.087880611 | 6.158347476 | -0.95394203  | 0.363988888 | 0.363988888 | -5.214287816 |
| 1431034_at   | 0.086945238  | 3.855182017 | 0.953932643  | 0.363993399 | 0.363993399 | -5.214295618 |
| 1422150_at   | 0.074852676  | 3.618575547 | 0.953869798  | 0.3640236   | 0.3640236   | -5.21434785  |
| 1456678_at   | 0.098526116  | 3.500319535 | 0.953855233  | 0.364030601 | 0.364030601 | -5.214359956 |
| 1452658_at   | 0.082705467  | 7.614734597 | 0.953734448  | 0.364088652 | 0.364088652 | -5.214460333 |
| 1426966_at   | 0.076397257  | 8.366018658 | 0.953720639  | 0.364095289 | 0.364095289 | -5.214471809 |
| 1432356_at   | 0.076572177  | 6.292629759 | 0.953676215  | 0.364116642 | 0.364116642 | -5.214508724 |
| 1446681_at   | 0.070724973  | 4.740601169 | 0.953675376  | 0.364117046 | 0.364117046 | -5.214509422 |
| 1439071_at   | 0.076608118  | 7.538110097 | 0.953664173  | 0.364122431 | 0.364122431 | -5.214518731 |
| 1434735_at   | 0.112552445  | 5.771048757 | 0.953661181  | 0.364123869 | 0.364123869 | -5.214521217 |
| 1446690_at   | 0.081039812  | 3.33622759  | 0.953648629  | 0.364129902 | 0.364129902 | -5.214531647 |
| 1427015_at   | -0.082813658 | 6.370217089 | -0.953623377 | 0.364142041 | 0.364142041 | -5.21455263  |
| 1449255_a_at | 0.057177341  | 13.43298323 | 0.953531125  | 0.364186388 | 0.364186388 | -5.214629282 |
| 1436459_at   | 0.076549843  | 7.799572779 | 0.953453716  | 0.364223603 | 0.364223603 | -5.214693596 |
| 1454271_at   | -0.061449258 | 4.688237844 | -0.953451087 | 0.364224868 | 0.364224868 | -5.214695781 |
| 1426737_at   | 0.097841571  | 6.759983283 | 0.953422716  | 0.364238508 | 0.364238508 | -5.214719351 |
| 1441643_at   | -0.114989194 | 6.053059231 | -0.95329573  | 0.364299565 | 0.364299565 | -5.214824844 |
| 1451404_at   | -0.083713408 | 6.763612338 | -0.953072796 | 0.364406775 | 0.364406775 | -5.215010018 |
| 1435916_at   | 0.10475361   | 7.372736612 | 0.953048694  | 0.364418367 | 0.364418367 | -5.215030036 |
| 1419606_a_at | -0.525310659 | 8.426202602 | -0.952908154 | 0.364485966 | 0.364485966 | -5.215146751 |
| 1460389_at   | 0.062587989  | 9.930091174 | 0.952900867  | 0.364489471 | 0.364489471 | -5.215152803 |
| 1423968_at   | -0.094914493 | 4.015670898 | -0.95289475  | 0.364492414 | 0.364492414 | -5.215157883 |
| 1443822_s_at | 0.084104505  | 7.18466277  | 0.952795815  | 0.364540007 | 0.364540007 | -5.215240037 |
| 1420844_at   | -0.08425105  | 5.641065002 | -0.9527426   | 0.364565608 | 0.364565608 | -5.215284223 |
| 1441102_at   | 0.085211695  | 3.528215384 | 0.952700649  | 0.364585792 | 0.364585792 | -5.215319055 |
| 1441117_at   | -0.082012282 | 7.851485412 | -0.952682766 | 0.364594396 | 0.364594396 | -5.215333903 |
| 1448401_at   | -0.067640957 | 9.132006395 | -0.952681365 | 0.36459507  | 0.36459507  | -5.215335066 |
| 1418214_at   | -0.072340426 | 7.739035201 | -0.952648762 | 0.364610756 | 0.364610756 | -5.215362135 |
| 1433147_at   | 0.098175002  | 8.097271738 | 0.95254732   | 0.364659568 | 0.364659568 | -5.215446354 |
| 1420724_at   | -0.092651185 | 4.20639703  | -0.95252752  | 0.364669095 | 0.364669095 | -5.215462791 |
| 1447418_at   | -0.080239356 | 3.90742785  | -0.952439377 | 0.364711512 | 0.364711512 | -5.215535961 |
| 1440744_at   | -0.098893885 | 4.11028137  | -0.952397362 | 0.364731732 | 0.364731732 | -5.215570838 |
| 1447401_at   | 0.081440034  | 4.572287481 | 0.952338882  | 0.364759877 | 0.364759877 | -5.21561938  |
| 1422947_at   | -0.085031116 | 3.382393283 | -0.952306648 | 0.364775391 | 0.364775391 | -5.215646135 |
| 1452402_at   | -0.094324886 | 7.325755557 | -0.95229014  | 0.364783337 | 0.364783337 | -5.215659836 |

|              |              |             |              |             |             |              |
|--------------|--------------|-------------|--------------|-------------|-------------|--------------|
| 1439423_x_at | -0.094185583 | 4.881808383 | -0.952273408 | 0.36479139  | 0.36479139  | -5.215673724 |
| 1454582_at   | -0.109713715 | 3.336687736 | -0.952265167 | 0.364795357 | 0.364795357 | -5.215680564 |
| 1460233_at   | -0.10667386  | 4.866244612 | -0.952260257 | 0.36479772  | 0.36479772  | -5.215684639 |
| 1426439_at   | 1.099208235  | 4.948689548 | 0.952229042  | 0.364812745 | 0.364812745 | -5.215710546 |
| 1457562_at   | 0.14756837   | 6.374334477 | 0.952208675  | 0.364822549 | 0.364822549 | -5.21572745  |
| 1451499_at   | -0.15731147  | 7.043931068 | -0.952132005 | 0.364859455 | 0.364859455 | -5.215791079 |
| 1450800_at   | 0.06402487   | 6.679482126 | 0.952121882  | 0.364864329 | 0.364864329 | -5.215799481 |
| 1445282_at   | -0.064276071 | 7.789991227 | -0.952025522 | 0.364910718 | 0.364910718 | -5.215879445 |
| 1435329_at   | 0.077040836  | 8.102860847 | 0.951875054  | 0.364983164 | 0.364983164 | -5.216004298 |
| 1432291_at   | -0.077307732 | 5.020505841 | -0.951721117 | 0.365057291 | 0.365057291 | -5.216132012 |
| 1445030_at   | -0.061826132 | 3.383826938 | -0.951720012 | 0.365057823 | 0.365057823 | -5.216132929 |
| 1430307_a_at | -0.116947665 | 8.151367125 | -0.951694772 | 0.365069978 | 0.365069978 | -5.216153868 |
| 1446819_at   | 0.094760275  | 3.937558239 | 0.951623935  | 0.365104094 | 0.365104094 | -5.216212632 |
| 1428400_at   | -0.0768015   | 6.139586386 | -0.951623095 | 0.365104499 | 0.365104499 | -5.216213329 |
| 1435461_at   | -0.078474981 | 8.793276296 | -0.95160588  | 0.36511279  | 0.36511279  | -5.216227609 |
| 1432337_at   | 0.062505025  | 3.970682395 | 0.951603775  | 0.365113804 | 0.365113804 | -5.216229355 |
| 1443211_at   | 0.099637211  | 6.845489686 | 0.951585313  | 0.365122696 | 0.365122696 | -5.216244669 |
| 1441353_at   | 0.064293357  | 3.475830201 | 0.951524792  | 0.365151846 | 0.365151846 | -5.216294871 |
| 1438253_at   | -0.096770331 | 5.117490807 | -0.951522815 | 0.365152798 | 0.365152798 | -5.216296511 |
| 1453892_at   | -0.125978148 | 4.377009254 | -0.951508001 | 0.365159934 | 0.365159934 | -5.216308799 |
| 1434823_x_at | -0.070210715 | 10.96680313 | -0.951479074 | 0.365173868 | 0.365173868 | -5.216332792 |
| 1430100_at   | 0.097176386  | 6.565755091 | 0.951387707  | 0.36521788  | 0.36521788  | -5.216408572 |
| 1416678_at   | 0.069346657  | 11.01294642 | 0.951334297  | 0.36524361  | 0.36524361  | -5.216452867 |
| 1451136_a_at | -0.069827705 | 9.48928429  | -0.95124483  | 0.365286713 | 0.365286713 | -5.216527063 |
| 1433796_at   | 0.089889414  | 7.049607304 | 0.951230404  | 0.365293664 | 0.365293664 | -5.216539026 |
| 1432470_at   | -0.088956816 | 5.467379352 | -0.951205783 | 0.365305526 | 0.365305526 | -5.216559442 |
| 1427869_at   | -0.078055315 | 4.096432051 | -0.951161981 | 0.365326632 | 0.365326632 | -5.216595765 |
| 1420970_at   | -0.120136113 | 5.835662425 | -0.951106499 | 0.365353365 | 0.365353365 | -5.21664177  |
| 1421386_at   | 0.119288318  | 5.691195578 | 0.951083393  | 0.365364499 | 0.365364499 | -5.216660929 |
| 1445596_at   | -0.089213392 | 3.848059029 | -0.950998222 | 0.365405543 | 0.365405543 | -5.216731546 |
| 1443304_at   | -0.069417169 | 3.705407642 | -0.950945816 | 0.365430798 | 0.365430798 | -5.216774995 |
| 1442844_at   | 0.103555978  | 4.504076935 | 0.950909353  | 0.365448371 | 0.365448371 | -5.216805224 |
| 1436005_at   | -0.069400056 | 6.237901863 | -0.950861594 | 0.36547139  | 0.36547139  | -5.216844818 |
| 1455625_at   | 0.119403808  | 6.186362185 | 0.950792342  | 0.365504769 | 0.365504769 | -5.216902226 |
| 1439902_at   | -0.086256325 | 4.128973851 | -0.950701952 | 0.365548339 | 0.365548339 | -5.216977153 |
| 1435922_at   | 0.104437674  | 8.510620255 | 0.950685215  | 0.365556407 | 0.365556407 | -5.216991025 |
| 1456786_at   | -0.186040468 | 5.821008704 | -0.950625825 | 0.365585038 | 0.365585038 | -5.217040252 |
| 1449814_at   | 0.088067001  | 5.028514934 | 0.950558432  | 0.365617528 | 0.365617528 | -5.217096108 |
| 1435628_x_at | 0.323328643  | 6.864702233 | 0.950548798  | 0.365622172 | 0.365622172 | -5.217104092 |
| 1421916_at   | 0.087055555  | 8.903017654 | 0.950520875  | 0.365635635 | 0.365635635 | -5.217127235 |
| 1427488_a_at | 0.118991738  | 5.757971715 | 0.950458194  | 0.365665856 | 0.365665856 | -5.217179181 |
| 1429843_at   | 0.069615321  | 6.658531545 | 0.950410871  | 0.365688674 | 0.365688674 | -5.217218398 |
| 1417034_at   | -0.067331668 | 8.110765826 | -0.950364382 | 0.365711091 | 0.365711091 | -5.217256922 |
| 1416300_a_at | 0.056993489  | 12.45040054 | 0.950321442  | 0.365731797 | 0.365731797 | -5.217292504 |
| 1424576_s_at | 0.07642271   | 3.549443803 | 0.950283002  | 0.365750335 | 0.365750335 | -5.217324356 |
| 1416695_at   | -0.094702835 | 7.780584753 | -0.950204201 | 0.365788337 | 0.365788337 | -5.217389648 |
| 1421706_at   | 0.072640472  | 3.691644421 | 0.950197025  | 0.365791798 | 0.365791798 | -5.217395593 |
| 1457436_at   | -0.086142676 | 5.464827494 | -0.950194137 | 0.365793191 | 0.365793191 | -5.217397986 |
| 1435064_a_at | 0.068268955  | 3.266005412 | 0.950167643  | 0.365805969 | 0.365805969 | -5.217419937 |
| 1436412_at   | 0.0676188    | 5.240054499 | 0.950141873  | 0.365818398 | 0.365818398 | -5.217441288 |
| 1435034_at   | 0.108945063  | 4.361126748 | 0.950106538  | 0.36583544  | 0.36583544  | -5.217470563 |
| 1439573_at   | -0.085985084 | 5.966592021 | -0.949937622 | 0.365916919 | 0.365916919 | -5.217610496 |
| 1433308_at   | -0.076694592 | 3.58971297  | -0.949890663 | 0.365939573 | 0.365939573 | -5.217649393 |



|              |              |             |              |             |             |              |
|--------------|--------------|-------------|--------------|-------------|-------------|--------------|
| 1427295_at   | -0.100062472 | 8.965814604 | -0.949878946 | 0.365945226 | 0.365945226 | -5.217659099 |
| 1450053_at   | 0.064172711  | 9.641995154 | 0.949741208  | 0.366011679 | 0.366011679 | -5.217773183 |
| 1415716_a_at | 0.067013678  | 13.24904685 | 0.949638319  | 0.366061325 | 0.366061325 | -5.217858394 |
| 1438334_at   | -0.065747987 | 5.484224001 | -0.949580162 | 0.366089389 | 0.366089389 | -5.217906556 |
| 1451705_a_at | 0.083110388  | 3.764040876 | 0.949465189  | 0.366144874 | 0.366144874 | -5.218001761 |
| 1433575_at   | 0.066654287  | 12.48316516 | 0.949306662  | 0.366221389 | 0.366221389 | -5.218133018 |
| 1451661_at   | 0.070242199  | 5.568435109 | 0.949239588  | 0.366253766 | 0.366253766 | -5.218188548 |
| 1428026_at   | -0.085028439 | 5.750236482 | -0.949152673 | 0.366295724 | 0.366295724 | -5.218260499 |
| 1440485_at   | -0.099495702 | 4.075899391 | -0.949022909 | 0.366358373 | 0.366358373 | -5.218367913 |
| 1421874_a_at | 0.102763302  | 8.497890405 | 0.948961461  | 0.366388043 | 0.366388043 | -5.218418774 |
| 1447668_x_at | -0.061501525 | 7.260965708 | -0.948936053 | 0.366400312 | 0.366400312 | -5.218439803 |
| 1448308_at   | -0.085517478 | 8.836274375 | -0.948922928 | 0.366406649 | 0.366406649 | -5.218450666 |
| 1454942_at   | -0.076957657 | 7.195354382 | -0.948798351 | 0.366466807 | 0.366466807 | -5.218553766 |
| 1425134_a_at | 0.076978891  | 9.382283213 | 0.948780325  | 0.366475513 | 0.366475513 | -5.218568684 |
| 1442696_at   | -0.094022778 | 4.050264217 | -0.948743772 | 0.366493166 | 0.366493166 | -5.218598933 |
| 1457114_at   | -0.108004074 | 6.026514404 | -0.948674541 | 0.366526603 | 0.366526603 | -5.218656222 |
| 1425359_at   | -0.078645198 | 4.289895612 | -0.948617516 | 0.366554146 | 0.366554146 | -5.218703407 |
| 1458024_at   | -0.067706078 | 3.189532372 | -0.94857832  | 0.366573079 | 0.366573079 | -5.218735839 |
| 1445561_at   | 0.072032726  | 8.223566658 | 0.948538391  | 0.366592366 | 0.366592366 | -5.218768876 |
| 1432246_at   | 0.111031627  | 3.79232692  | 0.94850604   | 0.366607993 | 0.366607993 | -5.218795642 |
| 1425020_at   | 0.072518542  | 8.301728885 | 0.948480888  | 0.366620143 | 0.366620143 | -5.218816451 |
| 1427006_at   | -0.09346058  | 8.395654461 | -0.948471563 | 0.366624648 | 0.366624648 | -5.218824166 |
| 1427065_at   | -0.06994039  | 7.149384185 | -0.948462008 | 0.366629264 | 0.366629264 | -5.218832072 |
| 1425331_at   | -0.102904189 | 8.320471891 | -0.948292937 | 0.366710946 | 0.366710946 | -5.218971939 |
| 1457267_at   | 0.062685639  | 5.700684047 | 0.948126315  | 0.366791459 | 0.366791459 | -5.21910976  |
| 1418909_at   | -0.101454212 | 5.330424575 | -0.948063687 | 0.366821724 | 0.366821724 | -5.219161558 |
| 1426034_a_at | 0.137550343  | 6.110382943 | 0.948044202  | 0.366831141 | 0.366831141 | -5.219177673 |
| 1429983_at   | 0.124118607  | 4.586523151 | 0.948035779  | 0.366835211 | 0.366835211 | -5.219184639 |
| 1429080_at   | -0.105677534 | 8.928313526 | -0.947950961 | 0.366876204 | 0.366876204 | -5.219254783 |
| 1447178_at   | -0.059107635 | 3.594074627 | -0.947815057 | 0.366941894 | 0.366941894 | -5.219367166 |
| 1424794_at   | 0.060019724  | 4.516892677 | 0.947789348  | 0.366954321 | 0.366954321 | -5.219388424 |
| 1456003_a_at | 0.129069921  | 7.648459593 | 0.947770429  | 0.366963466 | 0.366963466 | -5.219404066 |
| 1421997_s_at | -0.072824548 | 6.808636878 | -0.947747883 | 0.366974366 | 0.366974366 | -5.219422708 |
| 1427504_s_at | 0.076227278  | 12.33758769 | 0.947689212  | 0.367002729 | 0.367002729 | -5.219471218 |
| 1443521_at   | 0.079903577  | 7.7980978   | 0.947682955  | 0.367005754 | 0.367005754 | -5.219476391 |
| 1417213_a_at | 0.060363585  | 8.321602605 | 0.947572423  | 0.367059193 | 0.367059193 | -5.219567772 |
| 1448639_a_at | -0.06124894  | 7.887317176 | -0.94753423  | 0.36707766  | 0.36707766  | -5.219599347 |
| 1439036_a_at | -0.104367646 | 8.121712716 | -0.947507171 | 0.367090743 | 0.367090743 | -5.219621715 |
| 1449147_at   | -0.096331079 | 7.968305763 | -0.947451181 | 0.367117817 | 0.367117817 | -5.219667999 |
| 1444085_at   | 0.071632602  | 7.583857504 | 0.947319239  | 0.367181622 | 0.367181622 | -5.219777059 |
| 1428308_at   | -0.058622411 | 9.008732712 | -0.947314901 | 0.36718372  | 0.36718372  | -5.219780644 |
| 1441441_at   | -0.089528408 | 7.652186498 | -0.94725971  | 0.367210411 | 0.367210411 | -5.219826259 |
| 1449598_at   | -0.069762781 | 4.192559355 | -0.947239794 | 0.367220044 | 0.367220044 | -5.219842719 |
| 1451815_at   | 0.101488913  | 4.673677017 | 0.947234014  | 0.36722284  | 0.36722284  | -5.219847497 |
| 1427054_s_at | -0.135473634 | 8.640798006 | -0.947216289 | 0.367231412 | 0.367231412 | -5.219862146 |
| 1432130_a_at | 0.140899194  | 4.984109174 | 0.947181076  | 0.367248444 | 0.367248444 | -5.219891247 |
| 1421642_a_at | 0.069004772  | 3.947046731 | 0.947179028  | 0.367249434 | 0.367249434 | -5.21989294  |
| 1418026_at   | 0.05765001   | 7.7134487   | 0.9471536    | 0.367261734 | 0.367261734 | -5.219913954 |
| 1454272_at   | 0.088108443  | 5.299077393 | 0.94707768   | 0.367298457 | 0.367298457 | -5.219976693 |
| 1428119_a_at | 0.060086566  | 8.917365944 | 0.947051268  | 0.367311233 | 0.367311233 | -5.219998518 |
| 1435629_at   | -0.096816812 | 3.678232193 | -0.947020119 | 0.367326301 | 0.367326301 | -5.220024258 |
| 1443772_at   | 0.71681444   | 7.119811924 | 0.946804117  | 0.367430803 | 0.367430803 | -5.220202728 |
| 1441576_at   | -0.097004569 | 5.884880942 | -0.946796221 | 0.367434624 | 0.367434624 | -5.220209251 |

|              |              |             |              |             |             |              |
|--------------|--------------|-------------|--------------|-------------|-------------|--------------|
| 1431889_x_at | -0.082677565 | 4.349195905 | -0.946780197 | 0.367442378 | 0.367442378 | -5.22022249  |
| 1449026_at   | 0.081868546  | 8.649751675 | 0.946772338  | 0.36744618  | 0.36744618  | -5.220228982 |
| 1430551_s_at | -0.077300683 | 3.454024008 | -0.946719247 | 0.36747187  | 0.36747187  | -5.220272842 |
| 1434874_x_at | -0.074365451 | 4.868791215 | -0.946631079 | 0.367514536 | 0.367514536 | -5.220345676 |
| 1418980_a_at | -0.107713596 | 6.971752585 | -0.946533435 | 0.367561791 | 0.367561791 | -5.220426331 |
| 1432530_s_at | -0.088692677 | 3.4752579   | -0.946510437 | 0.367572922 | 0.367572922 | -5.220445327 |
| 1429483_at   | -0.07717099  | 3.42464814  | -0.946510332 | 0.367572973 | 0.367572973 | -5.220445414 |
| 1422477_at   | -0.072053545 | 6.223969521 | -0.946421069 | 0.367616176 | 0.367616176 | -5.220519138 |
| 1456469_x_at | -0.081119124 | 6.625958272 | -0.946359471 | 0.367645993 | 0.367645993 | -5.220570011 |
| 1456538_at   | -0.106800471 | 6.549021967 | -0.946348189 | 0.367651454 | 0.367651454 | -5.220579328 |
| 1454757_s_at | 0.059005063  | 9.018552453 | 0.946344987  | 0.367653004 | 0.367653004 | -5.220581972 |
| 1428637_at   | -0.072472188 | 9.406589455 | -0.946246358 | 0.367700749 | 0.367700749 | -5.220663422 |
| 1445165_at   | -0.083070476 | 4.646915739 | -0.946126121 | 0.36775896  | 0.36775896  | -5.220762705 |
| 1427042_at   | 0.218287978  | 6.1207489   | 0.946095832  | 0.367773626 | 0.367773626 | -5.220787714 |
| 1444127_at   | -0.073268666 | 4.29603045  | -0.946064123 | 0.367788979 | 0.367788979 | -5.220813895 |
| 1434829_at   | 0.05905026   | 8.614830546 | 0.946049022  | 0.36779629  | 0.36779629  | -5.220826363 |
| 1417439_at   | -0.105415217 | 9.035908269 | -0.94603351  | 0.367803802 | 0.367803802 | -5.220839171 |
| 1426230_at   | -0.085255961 | 5.31844538  | -0.94603268  | 0.367804204 | 0.367804204 | -5.220839856 |
| 1427615_at   | -0.06471449  | 3.354501165 | -0.945950373 | 0.367844059 | 0.367844059 | -5.220907808 |
| 1428848_a_at | -0.071430201 | 8.960253313 | -0.945821393 | 0.367906521 | 0.367906521 | -5.221014284 |
| 1427080_at   | 0.073663388  | 8.041411392 | 0.945809322  | 0.367912367 | 0.367912367 | -5.221024248 |
| 1428884_at   | -0.060064434 | 8.544659107 | -0.945805517 | 0.36791421  | 0.36791421  | -5.221027389 |
| 1426015_s_at | 0.077500339  | 8.043609198 | 0.945732844  | 0.367949408 | 0.367949408 | -5.221087377 |
| 1454097_at   | 0.061560751  | 4.040268173 | 0.945608873  | 0.368009457 | 0.368009457 | -5.221189699 |
| 1441763_at   | 0.078591353  | 5.577521627 | 0.94553576   | 0.368044874 | 0.368044874 | -5.22125004  |
| 1444670_at   | -0.079900717 | 7.116371716 | -0.945465489 | 0.368078917 | 0.368078917 | -5.221308031 |
| 1451924_a_at | -0.084132083 | 5.52495113  | -0.945432217 | 0.368095037 | 0.368095037 | -5.221335487 |
| 1421064_at   | 0.109689808  | 8.899257026 | 0.9453981    | 0.368111567 | 0.368111567 | -5.221363641 |
| 1427355_at   | 0.09439837   | 4.455662629 | 0.945349871  | 0.368134934 | 0.368134934 | -5.221403438 |
| 1440021_at   | -0.079313903 | 4.946943708 | -0.945327531 | 0.368145759 | 0.368145759 | -5.221421872 |
| 1431312_at   | -0.07422096  | 4.266669826 | -0.945314608 | 0.36815202  | 0.36815202  | -5.221432534 |
| 1418170_a_at | 0.072617358  | 8.240664757 | 0.945295856  | 0.368161107 | 0.368161107 | -5.221448007 |
| 1452576_at   | -0.087980996 | 3.625662065 | -0.945282141 | 0.368167752 | 0.368167752 | -5.221459323 |
| 1416208_at   | -0.068428341 | 9.614684487 | -0.945275641 | 0.368170902 | 0.368170902 | -5.221464686 |
| 1449260_at   | -0.085656004 | 4.096630686 | -0.945160971 | 0.368226469 | 0.368226469 | -5.221559296 |
| 1440872_at   | -0.075661673 | 5.209076397 | -0.945098888 | 0.368256557 | 0.368256557 | -5.221610514 |
| 1429126_at   | -0.085254026 | 7.666584753 | -0.945086344 | 0.368262636 | 0.368262636 | -5.221620862 |
| 1438513_at   | 0.095774748  | 7.261676415 | 0.944969438  | 0.368319297 | 0.368319297 | -5.221717301 |
| 1457511_at   | 0.093227485  | 5.95907926  | 0.944946482  | 0.368330424 | 0.368330424 | -5.221736236 |
| 1452415_at   | -0.084931354 | 7.090587735 | -0.944860147 | 0.368372274 | 0.368372274 | -5.221807449 |
| 1424965_at   | -0.10939801  | 4.613239162 | -0.944849597 | 0.368377388 | 0.368377388 | -5.22181615  |
| 1417670_at   | 0.07322339   | 8.438516739 | 0.94483459   | 0.368384663 | 0.368384663 | -5.221828528 |
| 1418470_at   | 0.073007205  | 7.490107062 | 0.944820795  | 0.36839135  | 0.36839135  | -5.221839905 |
| 1426064_at   | -0.091284744 | 3.266732806 | -0.944729099 | 0.368435804 | 0.368435804 | -5.221915532 |
| 1455195_at   | 0.066047098  | 8.611089385 | 0.944722468  | 0.368439018 | 0.368439018 | -5.221921    |
| 1422836_at   | 0.106212987  | 7.249274679 | 0.94464743   | 0.368475399 | 0.368475399 | -5.221982883 |
| 1458636_at   | 0.096207437  | 5.887145551 | 0.944590477  | 0.368503014 | 0.368503014 | -5.222029848 |
| 1444002_at   | -0.059707082 | 4.284872905 | -0.944540413 | 0.368527289 | 0.368527289 | -5.222071131 |
| 1458250_at   | -0.080883967 | 4.645254443 | -0.944539004 | 0.368527972 | 0.368527972 | -5.222072293 |
| 1448891_at   | 0.144548952  | 7.640619134 | 0.944522391  | 0.368536028 | 0.368536028 | -5.222085991 |
| 1423833_a_at | 0.068895195  | 10.61111367 | 0.944446142  | 0.368573004 | 0.368573004 | -5.222148862 |
| 1422648_at   | 0.068477678  | 5.345332336 | 0.944424343  | 0.368583575 | 0.368583575 | -5.222166835 |
| 1435246_at   | 0.098123734  | 6.394846718 | 0.94434422   | 0.368622432 | 0.368622432 | -5.222232894 |

|              |              |             |              |             |             |              |
|--------------|--------------|-------------|--------------|-------------|-------------|--------------|
| 1459175_at   | 0.065593333  | 3.332721438 | 0.944317416  | 0.368635432 | 0.368635432 | -5.222254992 |
| 1419739_at   | -0.152531997 | 6.226592825 | -0.944294047 | 0.368646766 | 0.368646766 | -5.222274258 |
| 1445142_at   | -0.094416992 | 4.747489068 | -0.944186029 | 0.368699159 | 0.368699159 | -5.222363305 |
| 1460458_at   | 0.137812487  | 7.261699896 | 0.944120099  | 0.36873114  | 0.36873114  | -5.222417652 |
| 1433768_at   | -0.063515915 | 10.6560885  | -0.944104915 | 0.368738506 | 0.368738506 | -5.222430168 |
| 1429805_at   | -0.085988425 | 5.013740086 | -0.9440704   | 0.36875525  | 0.36875525  | -5.222458618 |
| 1458814_at   | -0.115146624 | 5.967310501 | -0.944046699 | 0.368766748 | 0.368766748 | -5.222478153 |
| 1420943_at   | 0.089211579  | 7.948115324 | 0.944004798  | 0.368787075 | 0.368787075 | -5.222512688 |
| 1433658_x_at | 0.103810408  | 10.20019343 | 0.943770096  | 0.368900954 | 0.368900954 | -5.222706112 |
| 1419103_a_at | 0.080926566  | 7.890044339 | 0.943738099  | 0.368916481 | 0.368916481 | -5.222732478 |
| 1427104_at   | 0.074969928  | 7.712997279 | 0.943673385  | 0.368947885 | 0.368947885 | -5.222785802 |
| 1445615_at   | -0.069591414 | 4.126368771 | -0.94358107  | 0.368992688 | 0.368992688 | -5.222861864 |
| 1451014_at   | 0.091405259  | 6.017130729 | 0.943545627  | 0.36900989  | 0.36900989  | -5.222891065 |
| 1458022_at   | -0.063860241 | 4.011073216 | -0.943508941 | 0.369027697 | 0.369027697 | -5.22292129  |
| 1436153_a_at | 0.086299137  | 10.58608823 | 0.943432046  | 0.369065021 | 0.369065021 | -5.222984638 |
| 1432938_at   | 0.083122211  | 4.002084901 | 0.943426906  | 0.369067516 | 0.369067516 | -5.222988873 |
| 1444145_at   | -0.091184858 | 6.051063774 | -0.943340935 | 0.36910925  | 0.36910925  | -5.223059693 |
| 1452404_at   | 0.06859326   | 6.896916138 | 0.943331876  | 0.369113648 | 0.369113648 | -5.223067156 |
| 1443235_at   | -0.119221107 | 6.637643685 | -0.943331819 | 0.369113675 | 0.369113675 | -5.223067203 |
| 1425816_at   | 0.123971268  | 5.059966828 | 0.943307107  | 0.369125672 | 0.369125672 | -5.223087558 |
| 1435140_at   | 0.078251254  | 9.037708621 | 0.94323547   | 0.369160451 | 0.369160451 | -5.223146565 |
| 1450348_at   | -0.074878193 | 4.193945274 | -0.943220891 | 0.369167529 | 0.369167529 | -5.223158573 |
| 1436478_at   | 0.098968542  | 5.193360406 | 0.943109564  | 0.369221582 | 0.369221582 | -5.223250264 |
| 1445001_at   | 0.164940587  | 4.784268215 | 0.943101289  | 0.369225601 | 0.369225601 | -5.223257079 |
| 1431027_at   | -0.082718941 | 4.889512367 | -0.943100818 | 0.369225829 | 0.369225829 | -5.223257467 |
| 1454170_at   | -0.056307837 | 4.314808148 | -0.943096898 | 0.369227733 | 0.369227733 | -5.223260696 |
| 1452765_at   | -0.059080134 | 8.065717625 | -0.943087523 | 0.369232285 | 0.369232285 | -5.223268416 |
| 1417973_at   | -0.078844696 | 4.426181502 | -0.943081382 | 0.369235267 | 0.369235267 | -5.223273474 |
| 1440489_at   | -0.086013272 | 6.04181727  | -0.943073429 | 0.369239129 | 0.369239129 | -5.223280023 |
| 1424932_at   | 0.149124712  | 7.322088102 | 0.9430478    | 0.369251574 | 0.369251574 | -5.22330113  |
| 1431724_a_at | -0.089360753 | 4.639950575 | -0.943045348 | 0.369252764 | 0.369252764 | -5.22330315  |
| 1439164_at   | -0.08100769  | 5.130832825 | -0.943040379 | 0.369255177 | 0.369255177 | -5.223307241 |
| 1435397_at   | -0.108543294 | 9.186262303 | -0.943033777 | 0.369258383 | 0.369258383 | -5.223312678 |
| 1433331_at   | -0.061883835 | 3.156125534 | -0.943025244 | 0.369262527 | 0.369262527 | -5.223319706 |
| 1436604_at   | -0.08402192  | 4.778910206 | -0.943013529 | 0.369268216 | 0.369268216 | -5.223329353 |
| 1456927_at   | -0.06537795  | 6.893773471 | -0.94296217  | 0.369293157 | 0.369293157 | -5.223371647 |
| 1420004_s_at | -0.101848552 | 8.392229483 | -0.942943718 | 0.369302117 | 0.369302117 | -5.223386841 |
| 1438084_at   | -0.077292644 | 4.334557363 | -0.942914695 | 0.369316213 | 0.369316213 | -5.223410741 |
| 1458826_at   | 0.096517886  | 3.512798882 | 0.942904191  | 0.369321314 | 0.369321314 | -5.22341939  |
| 1431462_at   | -0.082374294 | 4.99769076  | -0.942859436 | 0.36934305  | 0.36934305  | -5.223456241 |
| 1421623_at   | -0.086747006 | 4.29016123  | -0.942715845 | 0.369412794 | 0.369412794 | -5.223574467 |
| 1457355_at   | 0.078330643  | 5.893869792 | 0.94265465   | 0.36944252  | 0.36944252  | -5.223624848 |
| 1454844_at   | 0.070065692  | 6.285039978 | 0.942639791  | 0.369449738 | 0.369449738 | -5.223637081 |
| 1451880_at   | 0.068558137  | 5.819587932 | 0.94263801   | 0.369450603 | 0.369450603 | -5.223638547 |
| 1446985_at   | -0.081535952 | 4.520602748 | -0.942593996 | 0.369471985 | 0.369471985 | -5.223674781 |
| 1453569_s_at | -0.104254115 | 7.144401487 | -0.942589764 | 0.369474041 | 0.369474041 | -5.223678265 |
| 1444953_at   | -0.101952771 | 5.97480017  | -0.942480529 | 0.36952711  | 0.36952711  | -5.223768184 |
| 1441242_at   | -0.062563417 | 4.703907793 | -0.942451816 | 0.369541061 | 0.369541061 | -5.223791818 |
| 1457887_at   | 0.08358823   | 6.079033333 | 0.942374155  | 0.369578795 | 0.369578795 | -5.223855741 |
| 1421570_at   | -0.073074316 | 4.050330426 | -0.942366343 | 0.369582591 | 0.369582591 | -5.22386217  |
| 1442284_at   | -0.115924513 | 5.057968979 | -0.942300249 | 0.369614707 | 0.369614707 | -5.223916568 |
| 1456339_at   | 0.077559606  | 7.157871441 | 0.942276238  | 0.369626375 | 0.369626375 | -5.223936329 |
| 1445655_at   | 0.070044682  | 3.942651939 | 0.942197607  | 0.369664588 | 0.369664588 | -5.22400104  |

|              |              |             |              |             |             |              |
|--------------|--------------|-------------|--------------|-------------|-------------|--------------|
| 1437116_at   | 0.125210475  | 3.590633241 | 0.942127115  | 0.369698846 | 0.369698846 | -5.224059048 |
| 1440739_at   | 0.113100174  | 7.543554354 | 0.942055496  | 0.369733656 | 0.369733656 | -5.22411798  |
| 1416548_at   | -0.061322334 | 7.713154973 | -0.942042104 | 0.369740165 | 0.369740165 | -5.224129    |
| 1448877_at   | 0.312549033  | 8.279883758 | 0.941946309  | 0.369786729 | 0.369786729 | -5.224207819 |
| 1452553_at   | 0.067301399  | 3.828565469 | 0.941924498  | 0.369797331 | 0.369797331 | -5.224225764 |
| 1452279_at   | -0.117448039 | 6.504109493 | -0.941914842 | 0.369802025 | 0.369802025 | -5.224233709 |
| 1421780_a_at | -0.094963788 | 4.255089937 | -0.941912575 | 0.369803127 | 0.369803127 | -5.224235574 |
| 1439986_at   | 0.081548972  | 3.95737308  | 0.94186145   | 0.369827981 | 0.369827981 | -5.224277635 |
| 1448349_at   | 0.075782324  | 4.490438883 | 0.941666556  | 0.369922735 | 0.369922735 | -5.224437961 |
| 1422395_at   | 0.075767439  | 3.101404456 | 0.941653269  | 0.369929196 | 0.369929196 | -5.224448891 |
| 1430088_at   | 0.070915     | 5.552947449 | 0.941369985  | 0.370066958 | 0.370066958 | -5.22468188  |
| 1437445_at   | -0.090739857 | 4.24244837  | -0.941336881 | 0.370083059 | 0.370083059 | -5.224709103 |
| 1443502_at   | -0.065467687 | 5.494570131 | -0.941252218 | 0.370124239 | 0.370124239 | -5.224778721 |
| 1456251_x_at | 0.11477702   | 6.981154058 | 0.941251431  | 0.370124622 | 0.370124622 | -5.224779368 |
| 1426177_a_at | -0.08593729  | 4.487006653 | -0.941237013 | 0.370131635 | 0.370131635 | -5.224791224 |
| 1418913_at   | -0.070085771 | 3.504725844 | -0.941223277 | 0.370138317 | 0.370138317 | -5.224802518 |
| 1457449_at   | 0.213625119  | 4.625718705 | 0.941187531  | 0.370155705 | 0.370155705 | -5.22483191  |
| 1432009_at   | 0.083613847  | 4.066362812 | 0.94117993   | 0.370159403 | 0.370159403 | -5.22483816  |
| 1437078_at   | -0.151613076 | 6.680911304 | -0.94114293  | 0.370177402 | 0.370177402 | -5.224868581 |
| 1446144_at   | -0.14387756  | 4.737326406 | -0.941142025 | 0.370177842 | 0.370177842 | -5.224869326 |
| 1440047_at   | -0.101831559 | 5.981763397 | -0.941044538 | 0.370225269 | 0.370225269 | -5.224949476 |
| 1422770_at   | -0.085002489 | 6.412758813 | -0.941038581 | 0.370228168 | 0.370228168 | -5.224954373 |
| 1445785_at   | -0.07391854  | 4.917116942 | -0.94099825  | 0.370247789 | 0.370247789 | -5.224987529 |
| 1424567_at   | -0.108051387 | 6.711063942 | -0.940954504 | 0.370269074 | 0.370269074 | -5.225023492 |
| 1449606_at   | -0.072409288 | 4.645059027 | -0.94093627  | 0.370277947 | 0.370277947 | -5.225038482 |
| 1458697_at   | -0.108991174 | 5.895971501 | -0.940906191 | 0.370292582 | 0.370292582 | -5.225063208 |
| 1454361_at   | -0.109911287 | 3.748894977 | -0.940755424 | 0.370365948 | 0.370365948 | -5.225187135 |
| 1431787_at   | -0.080086733 | 3.416398737 | -0.940754407 | 0.370366443 | 0.370366443 | -5.225187971 |
| 1445857_at   | 0.080677543  | 3.429640202 | 0.940679126  | 0.37040308  | 0.37040308  | -5.225249844 |
| 1436857_at   | 0.067116108  | 3.58425097  | 0.940678991  | 0.370403146 | 0.370403146 | -5.225249955 |
| 1429543_at   | 0.076215415  | 7.17477398  | 0.940614801  | 0.370434387 | 0.370434387 | -5.225302709 |
| 1430288_x_at | 0.074589574  | 13.42963504 | 0.940456563  | 0.37051141  | 0.37051141  | -5.225432744 |
| 1441950_s_at | -0.084457328 | 5.695351603 | -0.940438941 | 0.370519988 | 0.370519988 | -5.225447224 |
| 1416670_at   | 0.106582909  | 7.127056694 | 0.940357823  | 0.370559478 | 0.370559478 | -5.225513877 |
| 1437673_at   | 0.127179774  | 7.707570506 | 0.940349556  | 0.370563503 | 0.370563503 | -5.22552067  |
| 1417608_a_at | -0.065604625 | 13.36432987 | -0.940348939 | 0.370563803 | 0.370563803 | -5.225521176 |
| 1425856_at   | 0.137022665  | 5.243388858 | 0.940170339  | 0.37065076  | 0.37065076  | -5.225667909 |
| 1420040_at   | -0.082610073 | 4.827507213 | -0.940162473 | 0.37065459  | 0.37065459  | -5.225674371 |
| 1416248_at   | 0.059152679  | 9.171158495 | 0.940143092  | 0.370664028 | 0.370664028 | -5.225690293 |
| 1451124_at   | -0.0656222   | 11.2416351  | -0.940006943 | 0.370730328 | 0.370730328 | -5.225802132 |
| 1418649_at   | 0.109664511  | 7.317336132 | 0.940004117  | 0.370731704 | 0.370731704 | -5.225804453 |
| 1431222_at   | -0.083548243 | 5.505638143 | -0.939992074 | 0.370737569 | 0.370737569 | -5.225814345 |
| 1437714_x_at | -0.077135832 | 8.525482827 | -0.939925091 | 0.370770191 | 0.370770191 | -5.225869362 |
| 1449251_at   | -0.080232801 | 5.022323612 | -0.939852209 | 0.370805689 | 0.370805689 | -5.225929222 |
| 1450719_at   | -0.129661896 | 5.086213169 | -0.939835674 | 0.370813742 | 0.370813742 | -5.225942801 |
| 1450420_at   | 0.076471153  | 9.058459555 | 0.939817368  | 0.370822659 | 0.370822659 | -5.225957836 |
| 1424679_at   | 0.088282518  | 8.549051832 | 0.939793076  | 0.370834491 | 0.370834491 | -5.225977786 |
| 1418605_at   | -0.070850746 | 7.754505152 | -0.939719927 | 0.370870124 | 0.370870124 | -5.226037857 |
| 1455412_at   | -0.077321454 | 5.733867401 | -0.939646732 | 0.37090578  | 0.37090578  | -5.226097963 |
| 1460359_at   | -0.09574784  | 9.44796031  | -0.93959964  | 0.370928722 | 0.370928722 | -5.226136631 |
| 1442999_at   | 0.067325989  | 6.477873678 | 0.93956526   | 0.370945472 | 0.370945472 | -5.226164861 |
| 1420748_a_at | 0.063593911  | 4.46175447  | 0.939528334  | 0.370963463 | 0.370963463 | -5.226195179 |
| 1442924_at   | 0.085478495  | 6.594171429 | 0.939520556  | 0.370967252 | 0.370967252 | -5.226201565 |

|              |              |             |              |             |             |              |
|--------------|--------------|-------------|--------------|-------------|-------------|--------------|
| 1456698_s_at | 0.135970927  | 10.18187068 | 0.939518152  | 0.370968424 | 0.370968424 | -5.226203539 |
| 1455737_at   | -0.095294662 | 6.642882683 | -0.939508294 | 0.370973227 | 0.370973227 | -5.226211634 |
| 1459711_at   | -0.076635001 | 6.003009308 | -0.939463662 | 0.370994973 | 0.370994973 | -5.226248278 |
| 1422673_at   | -0.089551452 | 8.148605545 | -0.939455987 | 0.370998713 | 0.370998713 | -5.226254579 |
| 1417830_at   | 0.063489044  | 10.56846044 | 0.939346656  | 0.371051988 | 0.371051988 | -5.226344336 |
| 1438961_s_at | 0.094615522  | 10.96499152 | 0.939293993  | 0.371077651 | 0.371077651 | -5.226387569 |
| 1451710_at   | -0.110945177 | 4.164143136 | -0.939290333 | 0.371079435 | 0.371079435 | -5.226390573 |
| 1436920_at   | 0.124779516  | 8.267526544 | 0.939278235  | 0.371085331 | 0.371085331 | -5.226400504 |
| 1443324_at   | 0.086975117  | 3.904644411 | 0.939262421  | 0.371093037 | 0.371093037 | -5.226413485 |
| 1432728_at   | -0.073810119 | 4.932798652 | -0.939208062 | 0.37111953  | 0.37111953  | -5.226458106 |
| 1427231_at   | 0.158634427  | 9.296478018 | 0.939040825  | 0.371201043 | 0.371201043 | -5.226595371 |
| 1450683_at   | 0.166662784  | 6.821666868 | 0.939015443  | 0.371213415 | 0.371213415 | -5.226616202 |
| 1446001_at   | -0.074091583 | 7.742442507 | -0.938999533 | 0.371221171 | 0.371221171 | -5.226629259 |
| 1431852_at   | -0.101537749 | 5.01782044  | -0.938977034 | 0.371232138 | 0.371232138 | -5.226647723 |
| 1450390_x_at | -0.068774334 | 4.724795895 | -0.938931922 | 0.371254129 | 0.371254129 | -5.226684745 |
| 1434453_at   | -0.064836775 | 7.316882217 | -0.938908662 | 0.371265469 | 0.371265469 | -5.226703833 |
| 1459929_at   | 0.132386927  | 4.188019422 | 0.938806997  | 0.371315034 | 0.371315034 | -5.226787258 |
| 1448042_s_at | 0.115892278  | 5.591171809 | 0.938763765  | 0.371336112 | 0.371336112 | -5.226822732 |
| 1441124_at   | -0.081667052 | 4.782667701 | -0.938742679 | 0.371346393 | 0.371346393 | -5.226840033 |
| 1458472_at   | 0.120563958  | 4.387617458 | 0.938739781  | 0.371347806 | 0.371347806 | -5.226842411 |
| 1434669_at   | -0.084634109 | 6.245942202 | -0.938737238 | 0.371349046 | 0.371349046 | -5.226844497 |
| 1452029_a_at | -0.07783593  | 6.627437921 | -0.938731332 | 0.371351926 | 0.371351926 | -5.226849344 |
| 1443197_at   | -0.079691081 | 5.044989525 | -0.93867351  | 0.37138012  | 0.37138012  | -5.226896785 |
| 1443816_s_at | -0.070619205 | 7.698343722 | -0.938644961 | 0.371394041 | 0.371394041 | -5.226920208 |
| 1446723_at   | -0.061226316 | 3.318394555 | -0.938570466 | 0.371430368 | 0.371430368 | -5.226981325 |
| 1458564_at   | -0.085566532 | 4.326481482 | -0.938522621 | 0.371453701 | 0.371453701 | -5.227020576 |
| 1451944_a_at | -0.117242131 | 4.273092723 | -0.938417764 | 0.371504841 | 0.371504841 | -5.227106591 |
| 1436638_at   | 0.062470735  | 6.968922172 | 0.938354367  | 0.371535763 | 0.371535763 | -5.227158593 |
| 1456558_s_at | 0.070544154  | 3.355571052 | 0.938268779  | 0.371577511 | 0.371577511 | -5.227228793 |
| 1418378_at   | 0.101829667  | 4.491317623 | 0.938242408  | 0.371590375 | 0.371590375 | -5.227250421 |
| 1440048_at   | 0.06269899   | 7.05524197  | 0.938219156  | 0.371601718 | 0.371601718 | -5.227269491 |
| 1453127_at   | 0.081166158  | 5.592859626 | 0.938191579  | 0.371615171 | 0.371615171 | -5.227292108 |
| 1431208_a_at | -0.113375545 | 6.901845018 | -0.938162725 | 0.371629247 | 0.371629247 | -5.227315771 |
| 1439856_at   | -0.081161006 | 6.352360288 | -0.938131609 | 0.371644428 | 0.371644428 | -5.227341289 |
| 1430892_at   | -0.071130622 | 4.653306421 | -0.938123564 | 0.371648352 | 0.371648352 | -5.227347887 |
| 1456341_a_at | -0.138540018 | 8.734609506 | -0.938074387 | 0.371672345 | 0.371672345 | -5.227388215 |
| 1422189_x_at | 0.080436522  | 3.849481638 | 0.938074163  | 0.371672454 | 0.371672454 | -5.227388398 |
| 1427757_at   | -0.081343491 | 4.158946972 | -0.938072893 | 0.371673074 | 0.371673074 | -5.22738944  |
| 1447887_x_at | 0.087411582  | 3.653250011 | 0.93803938   | 0.371689425 | 0.371689425 | -5.227416921 |
| 1454378_at   | 0.0831793    | 6.320781282 | 0.938024233  | 0.371696816 | 0.371696816 | -5.227429342 |
| 1421027_a_at | -0.132688446 | 10.22179222 | -0.938005328 | 0.37170604  | 0.37170604  | -5.227444844 |
| 1420929_at   | 0.081309531  | 6.775429655 | 0.93798894   | 0.371714036 | 0.371714036 | -5.227458282 |
| 1422964_at   | -0.080585828 | 7.440748196 | -0.937915864 | 0.371749693 | 0.371749693 | -5.227518201 |
| 1438135_at   | 0.06600359   | 4.053818745 | 0.937870814  | 0.371771677 | 0.371771677 | -5.227555138 |
| 1440028_at   | 0.075944285  | 6.94604379  | 0.937870101  | 0.371772025 | 0.371772025 | -5.227555722 |
| 1428460_at   | 0.138514833  | 4.624218714 | 0.937768096  | 0.371821804 | 0.371821804 | -5.227639352 |
| 1446605_at   | 0.09302904   | 6.255275014 | 0.9377672    | 0.371822242 | 0.371822242 | -5.227640086 |
| 1458931_at   | 0.105504277  | 5.351328945 | 0.937757369  | 0.37182704  | 0.37182704  | -5.227648146 |
| 1430086_at   | -0.079288913 | 3.743463507 | -0.937730635 | 0.371840087 | 0.371840087 | -5.227670063 |
| 1440908_at   | -0.083879458 | 6.516616505 | -0.937671626 | 0.371868887 | 0.371868887 | -5.227718436 |
| 1452947_at   | -0.086682411 | 7.005164817 | -0.93757806  | 0.371914557 | 0.371914557 | -5.227795135 |
| 1433090_at   | 0.115674479  | 3.635517071 | 0.937542948  | 0.371931697 | 0.371931697 | -5.227823915 |
| 1418834_at   | 0.080558096  | 7.484849859 | 0.937492731  | 0.37195621  | 0.37195621  | -5.227865075 |

|              |              |             |              |             |             |              |
|--------------|--------------|-------------|--------------|-------------|-------------|--------------|
| 1451284_at   | -0.056791958 | 7.87325965  | -0.937491434 | 0.371956843 | 0.371956843 | -5.227866139 |
| 1419363_a_at | -0.087378939 | 9.418450895 | -0.937471151 | 0.371966745 | 0.371966745 | -5.227882763 |
| 1440123_at   | -0.162694371 | 6.190893478 | -0.937458333 | 0.371973002 | 0.371973002 | -5.227893268 |
| 1452571_at   | -0.077955976 | 4.179552883 | -0.937398167 | 0.372002374 | 0.372002374 | -5.227942579 |
| 1423954_at   | -0.099980524 | 4.620203888 | -0.937348311 | 0.372026715 | 0.372026715 | -5.227983438 |
| 1436777_at   | 0.084771858  | 3.559986744 | 0.937309309  | 0.372045758 | 0.372045758 | -5.228015401 |
| 1459128_at   | 0.068107223  | 3.484017785 | 0.937211707  | 0.372093414 | 0.372093414 | -5.228095382 |
| 1415718_at   | 0.111799483  | 9.16638245  | 0.937203969  | 0.372097192 | 0.372097192 | -5.228101724 |
| 1433226_at   | 0.059752909  | 4.044578328 | 0.937171155  | 0.372113215 | 0.372113215 | -5.228128611 |
| 1456239_at   | -0.071685505 | 3.375276769 | -0.937128262 | 0.372134161 | 0.372134161 | -5.228163757 |
| 1445833_at   | -0.081275828 | 4.206890548 | -0.937112504 | 0.372141856 | 0.372141856 | -5.228176669 |
| 1429854_at   | -0.068732569 | 3.327220702 | -0.937067262 | 0.37216395  | 0.37216395  | -5.228213738 |
| 1437136_at   | 0.099206323  | 4.004531326 | 0.937035509  | 0.372179457 | 0.372179457 | -5.228239753 |
| 1456411_at   | 0.079385401  | 7.213970985 | 0.936940621  | 0.3722258   | 0.3722258   | -5.228317493 |
| 1439427_at   | 0.131306388  | 4.228153124 | 0.93693306   | 0.372229493 | 0.372229493 | -5.228323687 |
| 1426967_at   | 0.107431649  | 6.853033991 | 0.936849671  | 0.372270224 | 0.372270224 | -5.228392    |
| 1452610_at   | -0.072217425 | 4.610643712 | -0.936843114 | 0.372273427 | 0.372273427 | -5.228397371 |
| 1419392_at   | 0.158444626  | 4.878009252 | 0.936838014  | 0.372275918 | 0.372275918 | -5.228401549 |
| 1440185_x_at | -0.080065195 | 7.103654322 | -0.936786902 | 0.372300885 | 0.372300885 | -5.228443417 |
| 1443305_at   | -0.067895268 | 3.20735523  | -0.936733856 | 0.372326798 | 0.372326798 | -5.228486868 |
| 1429376_s_at | 0.079243145  | 9.641277918 | 0.936725383  | 0.372330937 | 0.372330937 | -5.228493808 |
| 1454668_at   | -0.105766716 | 8.871857312 | -0.936688074 | 0.372349164 | 0.372349164 | -5.228524367 |
| 1447957_at   | 0.091941472  | 3.520112541 | 0.936686834  | 0.372349769 | 0.372349769 | -5.228525382 |
| 1452925_a_at | 0.076766663  | 8.738310524 | 0.936683197  | 0.372351546 | 0.372351546 | -5.228528361 |
| 1423106_at   | 0.06710472   | 9.421713417 | 0.936641028  | 0.372372148 | 0.372372148 | -5.228562899 |
| 1448621_a_at | -0.064230276 | 8.993903787 | -0.936613222 | 0.372385733 | 0.372385733 | -5.228585673 |
| 1424283_at   | 0.073941735  | 10.02809251 | 0.936589534  | 0.372397306 | 0.372397306 | -5.228605073 |
| 1440165_at   | -0.097149574 | 3.514496025 | -0.936538367 | 0.372422306 | 0.372422306 | -5.228646977 |
| 1437646_at   | 0.068611504  | 4.58959644  | 0.936527066  | 0.372427828 | 0.372427828 | -5.228656233 |
| 1442980_at   | 0.116263828  | 6.038245131 | 0.93647114   | 0.372455155 | 0.372455155 | -5.228702032 |
| 1416874_a_at | -0.071173602 | 7.440586786 | -0.936333328 | 0.372522499 | 0.372522499 | -5.228814881 |
| 1450920_at   | 0.061879078  | 9.999124162 | 0.936236669  | 0.372569738 | 0.372569738 | -5.228894023 |
| 1455913_x_at | -0.097977459 | 3.261943515 | -0.936234745 | 0.372570679 | 0.372570679 | -5.228895598 |
| 1446902_at   | -0.075551209 | 3.525100475 | -0.936197223 | 0.372589018 | 0.372589018 | -5.228926318 |
| 1422120_at   | 0.09735147   | 5.090309753 | 0.936176765  | 0.372599017 | 0.372599017 | -5.228943067 |
| 1445392_at   | -0.076256471 | 6.030965593 | -0.936165934 | 0.372604311 | 0.372604311 | -5.228951935 |
| 1451007_at   | 0.073814366  | 5.492884011 | 0.936088758  | 0.372642034 | 0.372642034 | -5.229015116 |
| 1417201_at   | 0.085416793  | 7.711753311 | 0.936071528  | 0.372650456 | 0.372650456 | -5.229029221 |
| 1460196_at   | -0.064005667 | 9.212246348 | -0.936063457 | 0.372654402 | 0.372654402 | -5.229035828 |
| 1429823_at   | -0.128689508 | 4.193379273 | -0.936036878 | 0.372667395 | 0.372667395 | -5.229057586 |
| 1451550_at   | 0.066728682  | 9.523522525 | 0.936026854  | 0.372672294 | 0.372672294 | -5.229065791 |
| 1427385_s_at | -0.097536963 | 6.629600464 | -0.936026008 | 0.372672708 | 0.372672708 | -5.229066484 |
| 1433608_at   | 0.07432356   | 6.020040599 | 0.936001673  | 0.372684604 | 0.372684604 | -5.229086404 |
| 1424974_at   | 0.127591442  | 5.004175696 | 0.935997767  | 0.372686514 | 0.372686514 | -5.229089602 |
| 1450222_x_at | 0.091348601  | 3.557869537 | 0.935952169  | 0.372708805 | 0.372708805 | -5.229126927 |
| 1433949_x_at | 0.085729542  | 3.40891649  | 0.935903315  | 0.372732689 | 0.372732689 | -5.229166915 |
| 1442662_at   | 0.087613451  | 4.969009523 | 0.935832706  | 0.372767211 | 0.372767211 | -5.229224707 |
| 1421388_at   | -0.067660421 | 7.20252131  | -0.935831815 | 0.372767647 | 0.372767647 | -5.229225436 |
| 1448060_at   | 0.085739022  | 6.5870216   | 0.935809597  | 0.37277851  | 0.37277851  | -5.22924362  |
| 1450084_s_at | 0.09944138   | 10.09788943 | 0.935784326  | 0.372790866 | 0.372790866 | -5.229264303 |
| 1448679_at   | 0.072630436  | 8.78671548  | 0.935674242  | 0.372844695 | 0.372844695 | -5.229354394 |
| 1418803_a_at | -0.099336302 | 3.46043163  | -0.93564309  | 0.372859929 | 0.372859929 | -5.229379887 |
| 1419840_at   | -0.092607621 | 5.199376059 | -0.935550088 | 0.37290541  | 0.37290541  | -5.229455989 |

|                    |              |             |              |             |             |              |
|--------------------|--------------|-------------|--------------|-------------|-------------|--------------|
| 1416539_at         | -0.077614023 | 6.612442748 | -0.935548525 | 0.372906175 | 0.372906175 | -5.229457268 |
| 1421855_at         | -0.122797249 | 4.186223676 | -0.935500756 | 0.372929537 | 0.372929537 | -5.229496355 |
| 1442538_at         | 0.098228224  | 7.064068868 | 0.935435903  | 0.372961257 | 0.372961257 | -5.229549418 |
| 1450604_at         | -0.06276383  | 4.62593674  | -0.93541852  | 0.37296976  | 0.37296976  | -5.22956364  |
| 1420636_a_at       | -0.084095328 | 8.270091488 | -0.935365216 | 0.372995832 | 0.372995832 | -5.22960725  |
| 1422724_at         | -0.111666767 | 4.434008005 | -0.935255338 | 0.373049582 | 0.373049582 | -5.229697141 |
| 1417332_at         | -0.075585555 | 6.423291555 | -0.935216902 | 0.373068385 | 0.373068385 | -5.229728583 |
| 1421247_at         | -0.179975657 | 8.634981485 | -0.935152831 | 0.373099731 | 0.373099731 | -5.229780993 |
| 1433253_at         | -0.060830981 | 4.007876325 | -0.935118652 | 0.373116453 | 0.373116453 | -5.22980895  |
| 1460355_at         | -0.081225718 | 7.675313092 | -0.935095642 | 0.373127711 | 0.373127711 | -5.229827771 |
| 1427534_at         | -0.11740681  | 6.217796199 | -0.934962224 | 0.373192993 | 0.373192993 | -5.229936892 |
| AFFX-b-ActinMur/M: | 0.059288983  | 14.16160794 | 0.934909838  | 0.373218627 | 0.373218627 | -5.229979734 |
| 1430473_at         | 0.090652131  | 3.809597025 | 0.934865692  | 0.373240231 | 0.373240231 | -5.230015837 |
| 1444137_at         | -0.140362223 | 4.548155196 | -0.934828707 | 0.373258332 | 0.373258332 | -5.230046082 |
| 1429692_s_at       | -0.085256646 | 4.012335598 | -0.934793893 | 0.373275369 | 0.373275369 | -5.23007455  |
| 1439094_at         | 0.070322486  | 8.184756095 | 0.934603654  | 0.373368483 | 0.373368483 | -5.2302301   |
| 1451696_at         | 0.337476836  | 6.102703731 | 0.934575104  | 0.373382459 | 0.373382459 | -5.230253443 |
| 1443094_at         | -0.105677583 | 3.397052948 | -0.934506723 | 0.373415933 | 0.373415933 | -5.230309348 |
| 1458068_at         | 0.071597526  | 6.361150218 | 0.934488442  | 0.373424883 | 0.373424883 | -5.230324292 |
| 1445240_at         | -0.091753761 | 4.252797401 | -0.934276666 | 0.373528569 | 0.373528569 | -5.230497405 |
| 1442609_at         | -0.070062047 | 6.200760539 | -0.934172027 | 0.373579808 | 0.373579808 | -5.230582929 |
| 1421137_a_at       | 0.129904089  | 3.812203136 | 0.933979646  | 0.373674026 | 0.373674026 | -5.230740146 |
| 1441998_at         | -0.063064335 | 4.786581009 | -0.933866566 | 0.373729414 | 0.373729414 | -5.230832545 |
| 1417062_at         | 0.066180451  | 8.880170483 | 0.933860099  | 0.373732582 | 0.373732582 | -5.230837829 |
| 1430265_at         | -0.060639623 | 5.774358228 | -0.933850566 | 0.373737252 | 0.373737252 | -5.230845618 |
| 1439165_at         | -0.103702023 | 6.4832288   | -0.93375401  | 0.373784552 | 0.373784552 | -5.230924507 |
| 1451027_at         | 0.082698808  | 6.397501728 | 0.933727221  | 0.373797676 | 0.373797676 | -5.230946393 |
| 1456134_x_at       | -0.076367956 | 7.59427021  | -0.933722692 | 0.373799895 | 0.373799895 | -5.230950093 |
| 1450976_at         | 0.130813109  | 7.958375231 | 0.933692184  | 0.373814841 | 0.373814841 | -5.230975017 |
| 1431802_a_at       | -0.08843998  | 8.051197055 | -0.933619077 | 0.373850659 | 0.373850659 | -5.231034739 |
| 1441496_at         | 0.093188739  | 6.659827632 | 0.933592728  | 0.373863569 | 0.373863569 | -5.231056264 |
| 1440601_at         | -0.071636089 | 3.979021323 | -0.933433216 | 0.373941731 | 0.373941731 | -5.231186556 |
| 1450614_x_at       | -0.098856244 | 3.832060051 | -0.933317012 | 0.373998679 | 0.373998679 | -5.231281462 |
| 1450093_s_at       | -0.113256047 | 5.736117032 | -0.933309679 | 0.374002273 | 0.374002273 | -5.231287451 |
| 1447776_x_at       | 0.110644213  | 8.929359257 | 0.933268564  | 0.374022424 | 0.374022424 | -5.231321028 |
| 1434312_at         | 0.084153384  | 8.530905839 | 0.933265834  | 0.374023762 | 0.374023762 | -5.231323258 |
| 1416043_at         | 0.060657809  | 7.532461272 | 0.933255572  | 0.374028791 | 0.374028791 | -5.231331638 |
| 1431766_x_at       | 0.056935242  | 13.74788117 | 0.933247997  | 0.374032504 | 0.374032504 | -5.231337824 |
| 1421429_a_at       | 0.153213689  | 5.799007188 | 0.933208814  | 0.374051709 | 0.374051709 | -5.231369822 |
| 1448629_at         | 0.082927271  | 8.299166847 | 0.933191772  | 0.374060063 | 0.374060063 | -5.231383738 |
| 1438009_at         | 0.086702802  | 13.0417492  | 0.933091351  | 0.374109287 | 0.374109287 | -5.231465737 |
| 1454160_at         | 0.089209696  | 3.414264086 | 0.933087613  | 0.374111119 | 0.374111119 | -5.23146879  |
| 1418629_a_at       | 0.092859279  | 10.71641762 | 0.933019626  | 0.374144447 | 0.374144447 | -5.231524301 |
| 1424485_at         | 0.066956398  | 3.472018278 | 0.933009258  | 0.37414953  | 0.37414953  | -5.231532766 |
| 1418077_at         | 0.073166239  | 6.964386433 | 0.932901445  | 0.374202387 | 0.374202387 | -5.231620787 |
| 1459891_at         | -0.08524837  | 4.760504598 | -0.932858354 | 0.374223515 | 0.374223515 | -5.231655966 |
| 1447048_at         | -0.074491256 | 6.319130187 | -0.932801154 | 0.374251561 | 0.374251561 | -5.23170266  |
| 1431108_at         | -0.067821653 | 5.989535016 | -0.932755328 | 0.374274032 | 0.374274032 | -5.231740068 |
| 1450286_at         | -0.066985488 | 5.449983085 | -0.932718835 | 0.374291927 | 0.374291927 | -5.231769856 |
| 1438625_s_at       | 0.110400981  | 11.54502831 | 0.932637421  | 0.374331852 | 0.374331852 | -5.231836309 |
| 1439169_at         | 0.057244444  | 8.124061119 | 0.932139954  | 0.374575873 | 0.374575873 | -5.232242255 |
| 1437932_a_at       | -0.117776203 | 7.057990668 | -0.932095471 | 0.374597698 | 0.374597698 | -5.232278545 |
| 1458484_at         | -0.08318272  | 3.749536258 | -0.932002647 | 0.374643246 | 0.374643246 | -5.23235427  |

|              |              |             |              |             |             |              |
|--------------|--------------|-------------|--------------|-------------|-------------|--------------|
| 1438293_at   | -0.068127929 | 7.641614065 | -0.931968341 | 0.37466008  | 0.37466008  | -5.232382255 |
| 1454209_at   | -0.065222331 | 5.305896584 | -0.931931366 | 0.374678224 | 0.374678224 | -5.232412415 |
| 1435109_at   | -0.082163579 | 6.635902514 | -0.931860909 | 0.374712802 | 0.374712802 | -5.232469886 |
| 1421002_at   | -0.091192306 | 7.78222808  | -0.931853468 | 0.374716453 | 0.374716453 | -5.232475955 |
| 1417496_at   | -0.084504123 | 4.066583311 | -0.93161966  | 0.374831213 | 0.374831213 | -5.23266664  |
| 1452061_s_at | -0.087802408 | 8.882233982 | -0.931614136 | 0.374833925 | 0.374833925 | -5.232671146 |
| 1446028_at   | -0.082649985 | 3.239666422 | -0.931612562 | 0.374834697 | 0.374834697 | -5.232672429 |
| 1438538_at   | -0.079762598 | 7.01092515  | -0.931612346 | 0.374834803 | 0.374834803 | -5.232672605 |
| 1440795_x_at | 0.083660531  | 9.411803493 | 0.93156646   | 0.374857329 | 0.374857329 | -5.232710023 |
| 1450148_at   | -0.092010879 | 4.270165699 | -0.931545776 | 0.374867483 | 0.374867483 | -5.23272689  |
| 1426879_at   | 0.073015335  | 8.009388422 | 0.931510918  | 0.374884596 | 0.374884596 | -5.232755314 |
| 1449800_x_at | -0.079748714 | 6.711242933 | -0.931501493 | 0.374889223 | 0.374889223 | -5.232762999 |
| 1460641_a_at | 0.098587605  | 7.23440872  | 0.931357436  | 0.374959951 | 0.374959951 | -5.232880456 |
| 1429325_at   | 0.091290621  | 7.282888612 | 0.93129843   | 0.374988924 | 0.374988924 | -5.232928562 |
| 1440159_at   | -0.083038186 | 3.804192944 | -0.931227817 | 0.375023598 | 0.375023598 | -5.232986127 |
| 1452633_s_at | -0.070253559 | 8.250324254 | -0.931215782 | 0.375029508 | 0.375029508 | -5.232995938 |
| 1418127_a_at | 0.069495289  | 9.6050822   | 0.931212932  | 0.375030907 | 0.375030907 | -5.232998261 |
| 1424444_a_at | 0.080195278  | 8.022871483 | 0.931188482  | 0.375042914 | 0.375042914 | -5.233018193 |
| 1446374_at   | 0.084336189  | 5.641426193 | 0.931145042  | 0.375064248 | 0.375064248 | -5.233053604 |
| 1426253_at   | -0.089380986 | 7.721271527 | -0.930998103 | 0.375136415 | 0.375136415 | -5.233173372 |
| 1442079_at   | -0.065547601 | 6.696834501 | -0.930932174 | 0.375168798 | 0.375168798 | -5.233227105 |
| 1418933_at   | -0.09997908  | 4.389730322 | -0.930924623 | 0.375172507 | 0.375172507 | -5.23323326  |
| 1455328_at   | -0.091088687 | 6.454966198 | -0.930860448 | 0.375204031 | 0.375204031 | -5.233285561 |
| 1425614_x_at | -0.07317477  | 4.35308762  | -0.930849001 | 0.375209654 | 0.375209654 | -5.233294889 |
| 1446800_at   | 0.10200625   | 4.435117598 | 0.930749226  | 0.37525867  | 0.37525867  | -5.233376196 |
| 1448209_a_at | -0.071046888 | 9.484977425 | -0.930641199 | 0.375311745 | 0.375311745 | -5.233464219 |
| 1451993_at   | 0.093434363  | 7.486361775 | 0.930622814  | 0.375320778 | 0.375320778 | -5.233479199 |
| 1430869_a_at | -0.06311918  | 6.136048707 | -0.930621168 | 0.375321587 | 0.375321587 | -5.23348054  |
| 1447947_at   | 0.068806331  | 7.096269624 | 0.930566387  | 0.375348504 | 0.375348504 | -5.233525173 |
| 1458991_at   | -0.126705743 | 4.774825796 | -0.93048424  | 0.37538887  | 0.37538887  | -5.233592099 |
| 1425502_x_at | 0.09171131   | 3.837805042 | 0.930454146  | 0.375403659 | 0.375403659 | -5.233616616 |
| 1448018_at   | -0.06378795  | 6.949114257 | -0.930375929 | 0.375442098 | 0.375442098 | -5.233680333 |
| 1448126_at   | 0.058778527  | 8.294458057 | 0.930275161  | 0.375491624 | 0.375491624 | -5.233762416 |
| 1417587_at   | 0.096970075  | 8.132926042 | 0.930236008  | 0.375510868 | 0.375510868 | -5.233794306 |
| 1447558_at   | -0.099998622 | 4.734124657 | -0.930221706 | 0.375517898 | 0.375517898 | -5.233805955 |
| 1430354_x_at | -0.084768832 | 7.295884381 | -0.930180573 | 0.375538116 | 0.375538116 | -5.233839457 |
| 1436217_at   | 0.094883549  | 7.664055722 | 0.930109038  | 0.375573281 | 0.375573281 | -5.233897718 |
| 1441568_at   | -0.103511989 | 5.732384117 | -0.930063258 | 0.375595786 | 0.375595786 | -5.233935001 |
| 1440012_at   | -0.108643807 | 7.685950712 | -0.930017527 | 0.375618268 | 0.375618268 | -5.233972243 |
| 1457197_at   | 0.08279207   | 6.125844913 | 0.929997721  | 0.375628005 | 0.375628005 | -5.233988371 |
| 1454103_at   | -0.07785493  | 3.682725128 | -0.929964266 | 0.375644453 | 0.375644453 | -5.234015615 |
| 1416025_at   | 0.07077806   | 3.87934522  | 0.929930083  | 0.375661259 | 0.375661259 | -5.23404345  |
| 1439129_at   | 0.103079499  | 4.273808074 | 0.929834452  | 0.37570828  | 0.37570828  | -5.234121318 |
| 1417330_at   | 0.093619449  | 4.926286877 | 0.929829475  | 0.375710727 | 0.375710727 | -5.23412537  |
| 1432488_a_at | 0.095659296  | 9.36419679  | 0.929820395  | 0.375715192 | 0.375715192 | -5.234132763 |
| 1446510_at   | 0.132981938  | 8.199390234 | 0.929731799  | 0.375758758 | 0.375758758 | -5.234204896 |
| 1422684_a_at | 0.058195767  | 9.467009652 | 0.929657595  | 0.375795249 | 0.375795249 | -5.234265307 |
| 1445973_at   | -0.062131698 | 5.10621319  | -0.929634393 | 0.37580666  | 0.37580666  | -5.234284195 |
| 1429998_at   | 0.076654987  | 3.371945993 | 0.929633924  | 0.375806891 | 0.375806891 | -5.234284577 |
| 1450294_a_at | 0.073896798  | 3.751110763 | 0.929627282  | 0.375810157 | 0.375810157 | -5.234289984 |
| 1429372_at   | 0.104233597  | 9.334015807 | 0.92956119   | 0.375842663 | 0.375842663 | -5.234343786 |
| 1443333_at   | 0.073450922  | 3.430619519 | 0.929459448  | 0.375892705 | 0.375892705 | -5.234426603 |
| 1443338_at   | -0.079367947 | 7.426868944 | -0.929440666 | 0.375901944 | 0.375901944 | -5.234441891 |



|              |              |             |              |             |             |              |
|--------------|--------------|-------------|--------------|-------------|-------------|--------------|
| 1428754_at   | 0.067112394  | 8.518360168 | 0.929439687  | 0.375902426 | 0.375902426 | -5.234442688 |
| 1427390_at   | 0.100788164  | 7.160308354 | 0.929409069  | 0.375917487 | 0.375917487 | -5.234467608 |
| 1446162_at   | -0.074427545 | 3.288439065 | -0.929373406 | 0.37593503  | 0.37593503  | -5.234496634 |
| 1417661_at   | -0.068459358 | 8.603517209 | -0.92921911  | 0.376010937 | 0.376010937 | -5.234622206 |
| 1440811_x_at | 0.091963655  | 3.969975341 | 0.929191225  | 0.376024657 | 0.376024657 | -5.234644899 |
| 1447762_x_at | 0.089664619  | 4.702345942 | 0.929097136  | 0.376070951 | 0.376070951 | -5.234721461 |
| 1446905_at   | 0.077356449  | 3.827614007 | 0.929092732  | 0.376073118 | 0.376073118 | -5.234725045 |
| 1444128_at   | -0.15105441  | 4.073139958 | -0.9290654   | 0.376086567 | 0.376086567 | -5.234747285 |
| 1442821_at   | 0.117547384  | 5.952680201 | 0.929021797  | 0.376108023 | 0.376108023 | -5.234782762 |
| 1430946_at   | 0.093849323  | 4.034050827 | 0.928942483  | 0.376147054 | 0.376147054 | -5.234847293 |
| 1460145_at   | -0.058129978 | 3.116290556 | -0.928930682 | 0.376152862 | 0.376152862 | -5.234856894 |
| 1435852_at   | 0.109133995  | 5.364355029 | 0.928908587  | 0.376163736 | 0.376163736 | -5.234874871 |
| 1427318_s_at | -0.068961895 | 8.009447119 | -0.928902224 | 0.376166867 | 0.376166867 | -5.234880047 |
| 1423750_a_at | -0.13201737  | 9.609371573 | -0.928848778 | 0.376193171 | 0.376193171 | -5.234923528 |
| 1424406_at   | 0.066608172  | 7.529384992 | 0.928757055  | 0.376238315 | 0.376238315 | -5.234998142 |
| 1454610_at   | 0.058878686  | 11.9986425  | 0.928747977  | 0.376242784 | 0.376242784 | -5.235005527 |
| 1460303_at   | 0.078403592  | 8.926861133 | 0.92867571   | 0.376278356 | 0.376278356 | -5.235064311 |
| 1419055_a_at | 0.10295969   | 5.601530613 | 0.928638827  | 0.376296512 | 0.376296512 | -5.235094311 |
| 1432536_at   | 0.080751164  | 3.660687661 | 0.928604294  | 0.376313511 | 0.376313511 | -5.235122399 |
| 1455750_at   | 0.066531948  | 6.5568799   | 0.928578922  | 0.376326001 | 0.376326001 | -5.235143034 |
| 1454889_x_at | 0.095568763  | 6.124431074 | 0.928557     | 0.376336794 | 0.376336794 | -5.235160864 |
| 1448020_at   | 0.062056243  | 7.793340578 | 0.928457091  | 0.376385981 | 0.376385981 | -5.235242118 |
| 1439894_at   | -0.064294182 | 5.580236145 | -0.928447949 | 0.376390482 | 0.376390482 | -5.235249553 |
| 1443016_at   | 0.06571062   | 4.518186882 | 0.928446045  | 0.37639142  | 0.37639142  | -5.235251101 |
| 1428247_at   | -0.06791036  | 8.691555843 | -0.928417849 | 0.376405303 | 0.376405303 | -5.235274031 |
| 1448245_at   | 0.057300654  | 13.64584673 | 0.92837684   | 0.376425494 | 0.376425494 | -5.235307379 |
| 1459501_at   | -0.073936984 | 4.219218908 | -0.928338826 | 0.376444212 | 0.376444212 | -5.235338292 |
| 1417073_a_at | 0.057763181  | 7.939178588 | 0.928301156  | 0.376462762 | 0.376462762 | -5.235368923 |
| 1458138_at   | 0.074922223  | 4.955421886 | 0.928143965  | 0.376540171 | 0.376540171 | -5.235496731 |
| 1443643_at   | 0.05905975   | 5.067903246 | 0.92812916   | 0.376547462 | 0.376547462 | -5.235508767 |
| 1435036_at   | -0.070465914 | 4.553021832 | -0.9279759   | 0.376622948 | 0.376622948 | -5.235633361 |
| 1424697_at   | 0.0768259    | 8.320611036 | 0.927964084  | 0.376628769 | 0.376628769 | -5.235642967 |
| 1453076_at   | 0.125498504  | 6.51959386  | 0.927923713  | 0.376648655 | 0.376648655 | -5.235675783 |
| 1416732_at   | 0.088011111  | 8.452116797 | 0.927889021  | 0.376665744 | 0.376665744 | -5.235703983 |
| 1455860_at   | 0.109944363  | 7.428360629 | 0.927823714  | 0.376697916 | 0.376697916 | -5.235757065 |
| 1455686_at   | 0.130094157  | 6.743726131 | 0.927815901  | 0.376701765 | 0.376701765 | -5.235763415 |
| 1450125_at   | -0.073110417 | 3.983228793 | -0.927814979 | 0.37670222  | 0.37670222  | -5.235764165 |
| 1448378_at   | -0.101594812 | 9.194607661 | -0.927756145 | 0.376731205 | 0.376731205 | -5.235811983 |
| 1444888_at   | 0.062711265  | 3.731812769 | 0.927706801  | 0.376755516 | 0.376755516 | -5.235852086 |
| 1457015_at   | 0.075906154  | 3.46095763  | 0.92766867   | 0.376774303 | 0.376774303 | -5.235883076 |
| 1434024_at   | -0.12077216  | 6.362750585 | -0.927595825 | 0.376810196 | 0.376810196 | -5.235942273 |
| 1435927_at   | -0.059715129 | 7.623772745 | -0.927595278 | 0.376810465 | 0.376810465 | -5.235942718 |
| 1453352_at   | -0.058948366 | 6.43301528  | -0.927575477 | 0.376820222 | 0.376820222 | -5.235958808 |
| 1456083_x_at | 0.078115913  | 10.81681488 | 0.927566104  | 0.376824841 | 0.376824841 | -5.235966425 |
| 1418018_at   | 0.114070022  | 8.248692646 | 0.927473937  | 0.376870259 | 0.376870259 | -5.236041318 |
| 1416195_at   | -0.061551235 | 7.808032931 | -0.927472798 | 0.37687082  | 0.37687082  | -5.236042243 |
| 1431045_at   | -0.066346961 | 5.850040348 | -0.927450186 | 0.376881964 | 0.376881964 | -5.236060617 |
| 1444886_at   | -0.110668257 | 5.956422165 | -0.927404241 | 0.376904607 | 0.376904607 | -5.236097948 |
| 1430513_at   | -0.118146235 | 4.684426904 | -0.927397736 | 0.376907813 | 0.376907813 | -5.236103233 |
| 1422081_at   | -0.083958856 | 3.916842286 | -0.927183412 | 0.37701345  | 0.37701345  | -5.236277353 |
| 1438402_at   | -0.135116062 | 7.693959827 | -0.927082159 | 0.377063364 | 0.377063364 | -5.236359601 |
| 1456005_a_at | 0.0886368    | 9.356009491 | 0.927063958  | 0.377072337 | 0.377072337 | -5.236374385 |
| 1427012_at   | -0.117514908 | 6.071812089 | -0.927020412 | 0.377093806 | 0.377093806 | -5.236409755 |

|              |              |             |              |             |             |              |
|--------------|--------------|-------------|--------------|-------------|-------------|--------------|
| 1452561_at   | -0.090342047 | 3.873195863 | -0.926999517 | 0.377104107 | 0.377104107 | -5.236426726 |
| 1443959_at   | -0.090024064 | 4.327782057 | -0.926935924 | 0.377135461 | 0.377135461 | -5.236478375 |
| 1447281_at   | -0.097681495 | 5.061448994 | -0.926814629 | 0.377195269 | 0.377195269 | -5.236576881 |
| 1426351_at   | -0.069363814 | 12.22569917 | -0.92678804  | 0.377208381 | 0.377208381 | -5.236598473 |
| 1420547_at   | -0.10641582  | 5.558292371 | -0.926695209 | 0.37725416  | 0.37725416  | -5.236673855 |
| 1426805_at   | 0.074649593  | 8.464788579 | 0.926656872  | 0.377273066 | 0.377273066 | -5.236704983 |
| 1429647_at   | -0.090297477 | 3.996469936 | -0.926613568 | 0.377294424 | 0.377294424 | -5.236740144 |
| 1420475_at   | 0.05693953   | 10.37290687 | 0.926598381  | 0.377301914 | 0.377301914 | -5.236752475 |
| 1417762_a_at | 0.064009099  | 13.2389419  | 0.926592094  | 0.377305015 | 0.377305015 | -5.23675758  |
| 1448130_at   | 0.08549004   | 9.440058031 | 0.926551527  | 0.377325023 | 0.377325023 | -5.236790516 |
| 1448467_a_at | -0.077845765 | 7.381998673 | -0.926381729 | 0.37740878  | 0.37740878  | -5.236928363 |
| 1425163_at   | 0.08245195   | 6.845471698 | 0.926318183  | 0.377440129 | 0.377440129 | -5.236979947 |
| 1448227_at   | 0.089624232  | 7.247735633 | 0.926278119  | 0.377459894 | 0.377459894 | -5.237012467 |
| 1453966_at   | 0.067180831  | 4.472386289 | 0.926277985  | 0.37745996  | 0.37745996  | -5.237012576 |
| 1459548_at   | 0.081104767  | 6.390553339 | 0.926265584  | 0.377466078 | 0.377466078 | -5.237022642 |
| 1448615_at   | -0.067897256 | 8.836255148 | -0.926259299 | 0.377469179 | 0.377469179 | -5.237027743 |
| 1440400_at   | -0.099765245 | 5.826476005 | -0.926206598 | 0.37749518  | 0.37749518  | -5.237070518 |
| 1454030_at   | 0.133748278  | 7.165761699 | 0.926161901  | 0.377517234 | 0.377517234 | -5.237106796 |
| 1438863_at   | -0.089975272 | 4.773950231 | -0.926153024 | 0.377521614 | 0.377521614 | -5.237114001 |
| 1421493_a_at | -0.072921174 | 3.626957454 | -0.926030944 | 0.377581854 | 0.377581854 | -5.237213076 |
| 1447629_at   | -0.095040966 | 3.63354583  | -0.926021036 | 0.377586743 | 0.377586743 | -5.237221117 |
| 1429226_at   | 0.122384667  | 6.089410559 | 0.925903332  | 0.37764483  | 0.37764483  | -5.237316631 |
| 1442934_at   | 0.064667704  | 4.444982211 | 0.925886518  | 0.377653129 | 0.377653129 | -5.237330274 |
| 1420222_at   | -0.073828095 | 3.629198627 | -0.9257804   | 0.377705505 | 0.377705505 | -5.237416376 |
| 1444312_at   | -0.080295551 | 6.801117185 | -0.925754388 | 0.377718344 | 0.377718344 | -5.23743748  |
| 1421000_at   | 0.080367863  | 8.693960706 | 0.925686432  | 0.377751888 | 0.377751888 | -5.237492613 |
| 1422294_at   | -0.065351264 | 3.798738532 | -0.925457774 | 0.377864773 | 0.377864773 | -5.237678099 |
| 1448755_at   | -0.110612595 | 7.068032016 | -0.925453037 | 0.377867112 | 0.377867112 | -5.237681942 |
| 1433725_at   | 0.073046474  | 9.22408547  | 0.925452525  | 0.377867365 | 0.377867365 | -5.237682357 |
| 1445624_at   | -0.070499022 | 5.792999228 | -0.925452363 | 0.377867445 | 0.377867445 | -5.237682489 |
| 1443420_at   | 0.073160209  | 3.386276454 | 0.925447418  | 0.377869886 | 0.377869886 | -5.2376865   |
| 1445642_at   | 0.073712105  | 3.465941949 | 0.925404092  | 0.377891279 | 0.377891279 | -5.237721641 |
| 1438610_a_at | 0.102751194  | 8.796159551 | 0.925326861  | 0.377929414 | 0.377929414 | -5.237784279 |
| 1444159_at   | -0.062780354 | 6.233104427 | -0.925310944 | 0.377937274 | 0.377937274 | -5.237797188 |
| 1431171_at   | -0.0852114   | 3.949342514 | -0.925257656 | 0.377963588 | 0.377963588 | -5.237840404 |
| 1418257_at   | -0.067630495 | 8.441322845 | -0.925236836 | 0.37797387  | 0.37797387  | -5.237857288 |
| 1447832_x_at | -0.071980756 | 3.309691733 | -0.92516944  | 0.378007154 | 0.378007154 | -5.237911942 |
| 1430907_at   | 0.08620207   | 3.410491463 | 0.925118523  | 0.378032301 | 0.378032301 | -5.23795323  |
| 1444271_at   | -0.11174251  | 5.29726294  | -0.924976314 | 0.378102542 | 0.378102542 | -5.238068536 |
| 1434069_at   | -0.096414134 | 8.213884038 | -0.924953244 | 0.378113938 | 0.378113938 | -5.238087241 |
| 1455066_s_at | -0.081258079 | 10.01074156 | -0.92490922  | 0.378135685 | 0.378135685 | -5.238122933 |
| 1440350_at   | -0.068175563 | 3.457491407 | -0.924814144 | 0.378182653 | 0.378182653 | -5.238200009 |
| 1455669_at   | 0.063409487  | 7.271523775 | 0.924790726  | 0.378194223 | 0.378194223 | -5.238218993 |
| 1425181_at   | 0.094293727  | 5.616700926 | 0.924737973  | 0.378220286 | 0.378220286 | -5.238261756 |
| 1453873_at   | 0.066521229  | 3.846859575 | 0.924677706  | 0.378250063 | 0.378250063 | -5.238310608 |
| 1417336_a_at | -0.073441048 | 7.408903391 | -0.924593475 | 0.378291683 | 0.378291683 | -5.238378879 |
| 1424920_at   | 0.056561107  | 7.221288402 | 0.92457078   | 0.378302898 | 0.378302898 | -5.238397273 |
| 1448804_at   | -0.117293656 | 4.126358661 | -0.924523377 | 0.378326322 | 0.378326322 | -5.238435692 |
| 1428795_at   | 0.084479502  | 8.231689826 | 0.924507222  | 0.378334306 | 0.378334306 | -5.238448785 |
| 1436112_at   | -0.0686059   | 5.647764435 | -0.924429473 | 0.378372729 | 0.378372729 | -5.238511793 |
| 1442669_at   | -0.079192776 | 4.364677531 | -0.924392772 | 0.378390867 | 0.378390867 | -5.238541534 |
| 1460038_at   | -0.116961501 | 3.813758781 | -0.924387326 | 0.378393559 | 0.378393559 | -5.238545948 |
| 1422392_at   | -0.076494215 | 3.247559504 | -0.924365246 | 0.378404472 | 0.378404472 | -5.23856384  |

|              |              |             |              |             |             |              |
|--------------|--------------|-------------|--------------|-------------|-------------|--------------|
| 1455223_at   | -0.131900763 | 8.445142518 | -0.924335855 | 0.378418998 | 0.378418998 | -5.238587657 |
| 1457869_at   | -0.077818335 | 3.74182004  | -0.924331423 | 0.378421189 | 0.378421189 | -5.238591248 |
| 1444957_at   | 0.068146976  | 3.106521985 | 0.924264435  | 0.378454299 | 0.378454299 | -5.238645527 |
| 1454182_at   | -0.078581923 | 7.356426232 | -0.924260894 | 0.37845605  | 0.37845605  | -5.238648397 |
| 1455821_x_at | 0.070962013  | 12.45975981 | 0.92419612   | 0.378488068 | 0.378488068 | -5.238700879 |
| 1446091_at   | 0.064933926  | 5.722709242 | 0.924164018  | 0.378503937 | 0.378503937 | -5.238726888 |
| 1420957_at   | 0.113082513  | 4.246859236 | 0.924152975  | 0.378509396 | 0.378509396 | -5.238735836 |
| 1418989_at   | 0.179017087  | 6.449102512 | 0.924132048  | 0.378519741 | 0.378519741 | -5.23875279  |
| 1427443_at   | -0.085833091 | 3.657376011 | -0.924049278 | 0.37856066  | 0.37856066  | -5.238819846 |
| 1437389_x_at | 0.098391836  | 9.65061006  | 0.924004103  | 0.378582995 | 0.378582995 | -5.238856442 |
| 1442160_at   | 0.073451915  | 4.250587656 | 0.923943244  | 0.378613085 | 0.378613085 | -5.238905741 |
| 1454468_at   | 0.076017381  | 3.110159888 | 0.923876073  | 0.378646298 | 0.378646298 | -5.238960151 |
| 1441275_at   | 0.091447884  | 4.196520063 | 0.923858256  | 0.378655108 | 0.378655108 | -5.238974582 |
| 1428557_a_at | 0.10072164   | 6.825255835 | 0.923839233  | 0.378664514 | 0.378664514 | -5.23898999  |
| 1421756_a_at | 0.068002484  | 6.203969522 | 0.923742254  | 0.378712472 | 0.378712472 | -5.239068537 |
| 1425026_at   | -0.062598612 | 5.464275967 | -0.923719515 | 0.378723717 | 0.378723717 | -5.239086953 |
| 1450663_at   | -0.068217651 | 9.95097185  | -0.923670585 | 0.378747915 | 0.378747915 | -5.239126579 |
| 1433243_at   | -0.101178214 | 3.662871087 | -0.923663767 | 0.378751288 | 0.378751288 | -5.239132101 |
| 1429898_at   | 0.11428576   | 5.792575752 | 0.923660118  | 0.378753092 | 0.378753092 | -5.239135055 |
| 1430602_at   | -0.061936382 | 3.326145518 | -0.923659164 | 0.378753564 | 0.378753564 | -5.239135828 |
| 1444604_at   | 0.093129453  | 5.802013213 | 0.923621481  | 0.378772201 | 0.378772201 | -5.239166345 |
| 1435229_at   | 0.088515803  | 6.227308194 | 0.923616111  | 0.378774857 | 0.378774857 | -5.239170693 |
| 1424550_at   | 0.104805608  | 6.685392085 | 0.923569788  | 0.378797769 | 0.378797769 | -5.239208205 |
| 1453903_at   | -0.096034595 | 3.926156484 | -0.923565285 | 0.378799996 | 0.378799996 | -5.239211852 |
| 1443430_at   | 0.101055918  | 5.743276258 | 0.923556997  | 0.378804095 | 0.378804095 | -5.239218563 |
| 1446754_a_at | -0.080453481 | 4.344497566 | -0.923406093 | 0.37887874  | 0.37887874  | -5.239340751 |
| 1419565_a_at | 0.084757654  | 7.508391526 | 0.923375505  | 0.378893872 | 0.378893872 | -5.239365517 |
| 1434592_at   | -0.077028826 | 5.976961665 | -0.923355951 | 0.378903546 | 0.378903546 | -5.239381349 |
| 1432206_at   | -0.086594368 | 4.459404026 | -0.923346716 | 0.378908115 | 0.378908115 | -5.239388825 |
| 1430062_at   | -0.080997143 | 4.198116571 | -0.923285138 | 0.378938579 | 0.378938579 | -5.239438678 |
| 1420427_a_at | 0.076566744  | 7.814175222 | 0.9232484    | 0.378956755 | 0.378956755 | -5.23946842  |
| 1438692_at   | 0.061122844  | 5.891136816 | 0.923223422  | 0.378969113 | 0.378969113 | -5.23948864  |
| 1435998_at   | -0.18598427  | 4.650548498 | -0.923215448 | 0.378973059 | 0.378973059 | -5.239495095 |
| 1433957_at   | 0.08659011   | 6.940167118 | 0.923195234  | 0.37898306  | 0.37898306  | -5.239511459 |
| 1418868_at   | -0.081926722 | 3.686044788 | -0.923093182 | 0.379033557 | 0.379033557 | -5.239594067 |
| 1457109_x_at | 0.058640325  | 3.075931862 | 0.923092634  | 0.379033828 | 0.379033828 | -5.23959451  |
| 1420366_at   | -0.063247701 | 4.037271674 | -0.923076964 | 0.379041582 | 0.379041582 | -5.239607194 |
| 1434612_s_at | 0.067686588  | 8.87952864  | 0.923068228  | 0.379045905 | 0.379045905 | -5.239614265 |
| 1460502_at   | 0.08354747   | 3.983419234 | 0.922999649  | 0.379079842 | 0.379079842 | -5.239669773 |
| 1458764_at   | 0.083708348  | 3.705476191 | 0.922978735  | 0.379090192 | 0.379090192 | -5.2396867   |
| 1453293_a_at | 0.077075256  | 6.114086891 | 0.922964162  | 0.379097404 | 0.379097404 | -5.239698494 |
| 1445182_at   | -0.061409112 | 3.516397384 | -0.92291792  | 0.379120289 | 0.379120289 | -5.239735919 |
| 1424212_at   | 0.061172812  | 7.201557691 | 0.922875204  | 0.37914143  | 0.37914143  | -5.239770489 |
| 1436889_at   | 0.182528444  | 7.378582896 | 0.922874267  | 0.379141894 | 0.379141894 | -5.239771247 |
| 1431897_at   | -0.079069406 | 3.515376949 | -0.922778738 | 0.379189177 | 0.379189177 | -5.239848553 |
| 1456637_at   | 0.060784084  | 3.520952481 | 0.922673362  | 0.379241338 | 0.379241338 | -5.239933821 |
| 1445268_at   | -0.073040384 | 7.565846507 | -0.922581194 | 0.379286966 | 0.379286966 | -5.240008394 |
| 1442315_at   | 0.127338574  | 6.727362121 | 0.92251139   | 0.379321525 | 0.379321525 | -5.240064869 |
| 1424700_at   | -0.068611118 | 8.333560523 | -0.922505419 | 0.379324481 | 0.379324481 | -5.240069698 |
| 1452477_at   | 0.086863485  | 4.713455135 | 0.922357015  | 0.379397962 | 0.379397962 | -5.240189752 |
| 1426512_at   | 0.074421311  | 3.2608645   | 0.922353408  | 0.379399748 | 0.379399748 | -5.24019267  |
| 1457471_at   | -0.060327535 | 4.007454254 | -0.922349224 | 0.37940182  | 0.37940182  | -5.240196054 |
| 1429674_at   | -0.108976517 | 4.185286819 | -0.922288975 | 0.379431655 | 0.379431655 | -5.240244788 |

|              |              |             |              |             |             |              |
|--------------|--------------|-------------|--------------|-------------|-------------|--------------|
| 1457331_at   | -0.122037297 | 3.893687679 | -0.922240843 | 0.379455491 | 0.379455491 | -5.24028372  |
| 1416399_a_at | -0.058155422 | 9.691494077 | -0.922218892 | 0.379466361 | 0.379466361 | -5.240301474 |
| 1419324_at   | -0.071884899 | 3.496206158 | -0.922203592 | 0.379473939 | 0.379473939 | -5.240313849 |
| 1440453_at   | -0.078307494 | 3.089370465 | -0.922162111 | 0.379494483 | 0.379494483 | -5.240347399 |
| 1417338_at   | -0.075322847 | 4.770444945 | -0.922102875 | 0.379523821 | 0.379523821 | -5.240395305 |
| 1446366_at   | -0.070925899 | 4.878922729 | -0.922061065 | 0.379544529 | 0.379544529 | -5.240429117 |
| 1444969_at   | 0.078460067  | 4.224532283 | 0.922028544  | 0.379560637 | 0.379560637 | -5.240455417 |
| 1441087_at   | 0.088307496  | 3.760698735 | 0.921988853  | 0.379580298 | 0.379580298 | -5.240487514 |
| 1452545_a_at | -0.063118757 | 10.79399104 | -0.921870497 | 0.379638928 | 0.379638928 | -5.240583217 |
| 1415824_at   | -0.233822336 | 9.919873463 | -0.92186635  | 0.379640982 | 0.379640982 | -5.24058657  |
| 1431783_at   | -0.1019273   | 3.932819916 | -0.92169697  | 0.3797249   | 0.3797249   | -5.240723514 |
| 1455670_at   | 0.060389147  | 6.420735114 | 0.921612729  | 0.379766642 | 0.379766642 | -5.240791615 |
| 1436520_at   | 0.104405149  | 5.807520854 | 0.921605263  | 0.379770341 | 0.379770341 | -5.24079765  |
| 1459625_at   | -0.092876722 | 5.940159681 | -0.921551342 | 0.379797061 | 0.379797061 | -5.240841238 |
| 1423888_at   | -0.08352212  | 7.856907913 | -0.921522817 | 0.379811197 | 0.379811197 | -5.240864295 |
| 1433894_at   | 0.093976983  | 7.095587744 | 0.921442326  | 0.379851087 | 0.379851087 | -5.240929355 |
| 1457942_at   | 0.091049572  | 3.735595223 | 0.92140219   | 0.379870978 | 0.379870978 | -5.240961794 |
| 1457141_at   | -0.413000104 | 5.528188157 | -0.921356026 | 0.379893858 | 0.379893858 | -5.240999105 |
| 1448872_at   | -0.200533129 | 7.57150719  | -0.921328454 | 0.379907524 | 0.379907524 | -5.241021389 |
| 1421432_at   | -0.112788332 | 4.371947557 | -0.921303608 | 0.379919839 | 0.379919839 | -5.241041468 |
| 1434930_at   | -0.099345883 | 8.690724673 | -0.921272625 | 0.379935196 | 0.379935196 | -5.241066506 |
| 1421507_at   | 0.16029757   | 3.560539247 | 0.921267059  | 0.379937955 | 0.379937955 | -5.241071005 |
| 1451318_a_at | -0.10584704  | 8.154370657 | -0.921238116 | 0.379952302 | 0.379952302 | -5.241094394 |
| 1450166_at   | -0.081891679 | 4.652128331 | -0.921183373 | 0.379979439 | 0.379979439 | -5.241138632 |
| 1419687_at   | -0.129315157 | 6.815678416 | -0.921157291 | 0.379992368 | 0.379992368 | -5.241159708 |
| 1422478_a_at | -0.122488338 | 5.52304337  | -0.921138977 | 0.380001447 | 0.380001447 | -5.241174507 |
| 1421485_at   | 0.111459624  | 4.254096802 | 0.921124786  | 0.380008482 | 0.380008482 | -5.241185973 |
| 1429492_x_at | -0.117373838 | 4.700843866 | -0.92111089  | 0.380015371 | 0.380015371 | -5.241197202 |
| 1418361_at   | -0.06020475  | 7.432071999 | -0.921093597 | 0.380023944 | 0.380023944 | -5.241211175 |
| 1425594_at   | -0.094360286 | 5.435842954 | -0.921021403 | 0.380059736 | 0.380059736 | -5.241269506 |
| 1445815_at   | 0.12119966   | 5.722381321 | 0.920986419  | 0.380077081 | 0.380077081 | -5.241297771 |
| 1443782_x_at | 0.088635218  | 3.898187474 | 0.920884595  | 0.380127569 | 0.380127569 | -5.241380035 |
| 1443885_at   | 0.062454416  | 3.965425452 | 0.920861278  | 0.380139131 | 0.380139131 | -5.241398872 |
| 1434112_at   | 0.083323773  | 10.33282036 | 0.920856765  | 0.380141369 | 0.380141369 | -5.241402517 |
| 1452371_at   | 0.057970457  | 11.79495415 | 0.920825523  | 0.380156861 | 0.380156861 | -5.241427755 |
| 1455824_x_at | -0.092262945 | 10.39228096 | -0.920815018 | 0.38016207  | 0.38016207  | -5.241436242 |
| 1447976_at   | 0.05817305   | 4.781301845 | 0.920751184  | 0.380193726 | 0.380193726 | -5.241487806 |
| 1453875_at   | 0.084052618  | 3.859081931 | 0.920745241  | 0.380196673 | 0.380196673 | -5.241492606 |
| 1450635_at   | 0.079912056  | 5.650085074 | 0.920742321  | 0.380198121 | 0.380198121 | -5.241494965 |
| 1434961_at   | -0.087239287 | 7.356132263 | -0.92067459  | 0.380231711 | 0.380231711 | -5.241549674 |
| 1422046_at   | 0.079249114  | 4.164141884 | 0.920655795  | 0.380241033 | 0.380241033 | -5.241564855 |
| 1446646_at   | 0.074426924  | 4.068720584 | 0.920640162  | 0.380248787 | 0.380248787 | -5.241577481 |
| 1458560_at   | 0.176766068  | 8.002114723 | 0.92061391   | 0.380261807 | 0.380261807 | -5.241598684 |
| 1447815_x_at | -0.070132062 | 3.359595632 | -0.92059848  | 0.38026946  | 0.38026946  | -5.241611146 |
| 1416662_at   | -0.078853218 | 6.899990074 | -0.920545639 | 0.380295669 | 0.380295669 | -5.241653824 |
| 1452437_at   | 0.056338443  | 4.708828701 | 0.920525858  | 0.380305481 | 0.380305481 | -5.241669798 |
| 1446203_at   | -0.06822138  | 4.042672907 | -0.920456686 | 0.380339793 | 0.380339793 | -5.241725661 |
| 1421097_at   | -0.069111834 | 6.974738114 | -0.920455319 | 0.380340471 | 0.380340471 | -5.241726764 |
| 1430350_at   | -0.074822871 | 3.552949854 | -0.920418179 | 0.380358895 | 0.380358895 | -5.241756757 |
| 1456945_at   | -0.086069842 | 7.98303683  | -0.920408513 | 0.38036369  | 0.38036369  | -5.241764562 |
| 1447996_at   | -0.085539344 | 4.663185163 | -0.920406466 | 0.380364705 | 0.380364705 | -5.241766215 |
| 1454705_at   | 0.069037345  | 9.896164168 | 0.920258313  | 0.380438206 | 0.380438206 | -5.241885844 |
| 1460011_at   | 0.139879194  | 8.523688627 | 0.920187595  | 0.380473294 | 0.380473294 | -5.241942941 |

|              |              |             |              |             |             |              |
|--------------|--------------|-------------|--------------|-------------|-------------|--------------|
| 1456220_at   | -0.070829271 | 8.523632009 | -0.920083576 | 0.380524908 | 0.380524908 | -5.242026918 |
| 1425626_at   | -0.096744096 | 5.391442613 | -0.920075792 | 0.380528771 | 0.380528771 | -5.242033202 |
| 1433733_a_at | -0.082780588 | 7.339731529 | -0.919985376 | 0.38057364  | 0.38057364  | -5.242106191 |
| 1449390_at   | -0.11588258  | 5.435010314 | -0.919863764 | 0.380633996 | 0.380633996 | -5.242204353 |
| 1457153_at   | 0.073282035  | 5.808288834 | 0.919734689  | 0.380698064 | 0.380698064 | -5.242308527 |
| 1453230_at   | 0.071763433  | 7.312493069 | 0.919681731  | 0.380724352 | 0.380724352 | -5.242351266 |
| 1435121_at   | 0.118420455  | 7.956241029 | 0.919623351  | 0.380753334 | 0.380753334 | -5.242398378 |
| 1432973_at   | -0.062801925 | 3.548666865 | -0.919609652 | 0.380760135 | 0.380760135 | -5.242409432 |
| 1424691_at   | -0.093007267 | 5.464666108 | -0.919498618 | 0.38081526  | 0.38081526  | -5.242499027 |
| 1442517_a_at | 0.064094867  | 3.769945181 | 0.91945962   | 0.380834623 | 0.380834623 | -5.242530493 |
| 1449191_at   | -0.101403607 | 5.636923186 | -0.919447668 | 0.380840557 | 0.380840557 | -5.242540136 |
| 1439203_at   | -0.063579124 | 4.663287908 | -0.919345171 | 0.380891452 | 0.380891452 | -5.242622831 |
| 1439592_at   | 0.111452291  | 4.448424185 | 0.919332795  | 0.380897597 | 0.380897597 | -5.242632816 |
| 1419469_at   | 0.117748842  | 8.179341053 | 0.919281511  | 0.380923064 | 0.380923064 | -5.242674188 |
| 1429997_at   | 0.080022075  | 4.646853393 | 0.91916801   | 0.380979432 | 0.380979432 | -5.242765747 |
| 1460427_a_at | 0.076232479  | 4.825234565 | 0.919161938  | 0.380982447 | 0.380982447 | -5.242770644 |
| 1435650_at   | -0.095675905 | 5.32152142  | -0.919108216 | 0.38100913  | 0.38100913  | -5.242813978 |
| 1436017_at   | 0.067848338  | 7.746554482 | 0.919022261  | 0.381051823 | 0.381051823 | -5.242883306 |
| 1443767_at   | -0.074300422 | 3.040654557 | -0.918941994 | 0.381091695 | 0.381091695 | -5.242948042 |
| 1417564_at   | -0.059139405 | 8.751935801 | -0.918929109 | 0.381098096 | 0.381098096 | -5.242958433 |
| 1434178_at   | 0.065643307  | 9.142556995 | 0.918877852  | 0.381123559 | 0.381123559 | -5.242999769 |
| 1435548_at   | -0.09312544  | 6.434066443 | -0.918805586 | 0.381159461 | 0.381159461 | -5.243058044 |
| 1423660_at   | 0.112019047  | 8.750973616 | 0.918652184  | 0.38123568  | 0.38123568  | -5.243181737 |
| 1425671_at   | -0.099177993 | 3.65900854  | -0.918589988 | 0.381266585 | 0.381266585 | -5.243231881 |
| 1415748_a_at | -0.10945702  | 9.817158704 | -0.918568329 | 0.381277348 | 0.381277348 | -5.243249343 |
| 1456154_at   | -0.069805337 | 4.829823531 | -0.918521686 | 0.381300527 | 0.381300527 | -5.243286946 |
| 1439925_at   | -0.105771709 | 5.143731554 | -0.918509017 | 0.381306823 | 0.381306823 | -5.24329716  |
| 1434635_at   | -0.095152925 | 5.518107842 | -0.918493391 | 0.381314588 | 0.381314588 | -5.243309757 |
| 1423418_at   | 0.077612992  | 10.26293197 | 0.91848667   | 0.381317929 | 0.381317929 | -5.243315175 |
| 1442330_at   | 0.167138462  | 6.365354391 | 0.918477721  | 0.381322376 | 0.381322376 | -5.243322389 |
| 1436037_at   | -0.118617919 | 7.153661885 | -0.918443252 | 0.381339506 | 0.381339506 | -5.243350176 |
| 1434027_at   | 0.067682054  | 7.406929466 | 0.918418951  | 0.381351584 | 0.381351584 | -5.243369765 |
| 1454994_at   | -0.062347971 | 8.162024832 | -0.918403914 | 0.381359057 | 0.381359057 | -5.243381887 |
| 1450169_at   | -0.100307205 | 3.862590695 | -0.918384398 | 0.381368757 | 0.381368757 | -5.243397619 |
| 1450351_a_at | -0.086473431 | 7.453451672 | -0.918212903 | 0.381453999 | 0.381453999 | -5.243535846 |
| 1434361_at   | 0.077727904  | 7.462547845 | 0.918210073  | 0.381455406 | 0.381455406 | -5.243538127 |
| 1441942_x_at | -0.111036328 | 6.289874692 | -0.918162206 | 0.381479201 | 0.381479201 | -5.243576705 |
| 1432515_at   | -0.102015467 | 4.785635758 | -0.918124582 | 0.381497905 | 0.381497905 | -5.243607026 |
| 1441030_at   | -0.113899976 | 7.954427697 | -0.918095411 | 0.381512407 | 0.381512407 | -5.243630535 |
| 1444387_at   | 0.087329092  | 7.052595802 | 0.917988271  | 0.381565674 | 0.381565674 | -5.243716871 |
| 1436813_x_at | 0.062607304  | 9.281556352 | 0.917985911  | 0.381566848 | 0.381566848 | -5.243718773 |
| 1427487_at   | -0.076377916 | 5.736696893 | -0.917962104 | 0.381578685 | 0.381578685 | -5.243737957 |
| 1439083_at   | -0.114759905 | 5.491176623 | -0.917814339 | 0.38165216  | 0.38165216  | -5.243857015 |
| 1457438_at   | 0.068006663  | 5.011566671 | 0.917600923  | 0.381758298 | 0.381758298 | -5.244028941 |
| 1451876_a_at | 0.070655883  | 6.971403257 | 0.917585288  | 0.381766075 | 0.381766075 | -5.244041535 |
| 1440863_at   | 0.079673235  | 3.49539325  | 0.917566251  | 0.381775544 | 0.381775544 | -5.24405687  |
| 1437179_at   | 0.072362623  | 9.311483875 | 0.917482761  | 0.381817072 | 0.381817072 | -5.244124118 |
| 1454100_at   | 0.084098449  | 3.806758494 | 0.917377095  | 0.381869637 | 0.381869637 | -5.244209221 |
| 1447307_at   | -0.102720342 | 3.685427519 | -0.917324751 | 0.381895677 | 0.381895677 | -5.244251375 |
| 1423254_x_at | -0.057087217 | 11.43437941 | -0.917312241 | 0.381901902 | 0.381901902 | -5.24426145  |
| 1428399_a_at | 0.07320829   | 6.572442088 | 0.917222492  | 0.381946554 | 0.381946554 | -5.244333723 |
| 1457013_at   | 0.090179983  | 4.624859398 | 0.917147209  | 0.381984013 | 0.381984013 | -5.244394343 |
| 1440838_at   | 0.116764398  | 5.212172117 | 0.917091662  | 0.382011653 | 0.382011653 | -5.244439068 |

|              |              |             |              |             |             |              |
|--------------|--------------|-------------|--------------|-------------|-------------|--------------|
| 1444782_at   | -0.088431768 | 4.210105779 | -0.916816943 | 0.382148375 | 0.382148375 | -5.244660233 |
| 1420249_s_at | 0.07500707   | 4.061737056 | 0.916739286  | 0.38218703  | 0.38218703  | -5.244722741 |
| 1440224_at   | 0.082711996  | 6.138616448 | 0.91668891   | 0.382212106 | 0.382212106 | -5.244763288 |
| 1416582_a_at | -0.062845735 | 8.287053504 | -0.916682116 | 0.382215488 | 0.382215488 | -5.244768756 |
| 1431002_x_at | 0.065465228  | 6.61334565  | 0.916638492  | 0.382237205 | 0.382237205 | -5.244803867 |
| 1442899_at   | 0.129808605  | 4.497712226 | 0.916634507  | 0.382239189 | 0.382239189 | -5.244807074 |
| 1441219_at   | -0.140030884 | 4.676162097 | -0.916511138 | 0.382300609 | 0.382300609 | -5.24490636  |
| 1429166_s_at | 0.101962904  | 7.065101655 | 0.916453583  | 0.382329265 | 0.382329265 | -5.244952675 |
| 1448685_at   | 0.060378884  | 10.53579402 | 0.916452371  | 0.382329869 | 0.382329869 | -5.24495365  |
| 1422857_at   | 0.080375223  | 7.687144084 | 0.916425168  | 0.382343413 | 0.382343413 | -5.24497554  |
| 1427109_at   | -0.074053434 | 9.370448959 | -0.916293844 | 0.382408807 | 0.382408807 | -5.245081208 |
| 1424233_at   | 0.124901337  | 8.552465236 | 0.916268308  | 0.382421523 | 0.382421523 | -5.245101753 |
| 1459282_at   | -0.110623217 | 4.967291106 | -0.916178186 | 0.382466405 | 0.382466405 | -5.245174259 |
| 1449557_at   | 0.07942205   | 7.207271132 | 0.916100089  | 0.382505302 | 0.382505302 | -5.245237087 |
| 1429331_at   | 0.254862751  | 7.647641342 | 0.916096495  | 0.382507093 | 0.382507093 | -5.245239978 |
| 1451245_at   | -0.111600534 | 5.767656566 | -0.916057202 | 0.382526664 | 0.382526664 | -5.245271586 |
| 1419628_at   | 0.074520278  | 4.949032516 | 0.916003975  | 0.382553176 | 0.382553176 | -5.245314402 |
| 1446702_at   | 0.081011694  | 4.956629719 | 0.915989873  | 0.382560201 | 0.382560201 | -5.245325745 |
| 1445630_at   | -0.06346669  | 4.928994461 | -0.915887028 | 0.382611433 | 0.382611433 | -5.245408467 |
| 1455117_at   | 0.065767     | 6.506163004 | 0.91586188   | 0.382623961 | 0.382623961 | -5.245428693 |
| 1431667_s_at | -0.085227624 | 6.059696036 | -0.915834644 | 0.38263753  | 0.38263753  | -5.245450598 |
| 1440920_at   | 0.121806472  | 7.587321294 | 0.915816767  | 0.382646436 | 0.382646436 | -5.245464976 |
| 1433476_at   | -0.063451639 | 10.89566778 | -0.915792091 | 0.38265873  | 0.38265873  | -5.245484821 |
| 1425549_at   | 0.098194493  | 5.972512563 | 0.915774582  | 0.382667454 | 0.382667454 | -5.245498902 |
| 1442504_at   | 0.085148001  | 6.056568751 | 0.915705121  | 0.382702062 | 0.382702062 | -5.245554762 |
| 1441960_x_at | 0.093617183  | 8.065949841 | 0.915671768  | 0.38271868  | 0.38271868  | -5.245581583 |
| 1429869_at   | -0.083157216 | 5.972817702 | -0.91562309  | 0.382742936 | 0.382742936 | -5.245620726 |
| 1459508_at   | -0.073506857 | 3.030908955 | -0.91561876  | 0.382745093 | 0.382745093 | -5.245624208 |
| 1423732_at   | -0.059197882 | 10.26448853 | -0.915571368 | 0.382768709 | 0.382768709 | -5.245662315 |
| 1436195_at   | 0.058514647  | 7.422221453 | 0.915565512  | 0.382771628 | 0.382771628 | -5.245667024 |
| 1430646_at   | -0.139430664 | 7.888594706 | -0.915556472 | 0.382776132 | 0.382776132 | -5.245674292 |
| 1443473_at   | -0.063460852 | 3.619411453 | -0.915531372 | 0.38278864  | 0.38278864  | -5.245694473 |
| 1415916_a_at | 0.068354879  | 9.552404818 | 0.915430835  | 0.382838744 | 0.382838744 | -5.245775306 |
| 1426343_at   | -0.113545211 | 9.104469307 | -0.915300444 | 0.382903733 | 0.382903733 | -5.24588013  |
| 1460283_at   | -0.083376887 | 5.760849891 | -0.915185478 | 0.38296104  | 0.38296104  | -5.245972544 |
| 1459062_x_at | 0.083201481  | 3.576662947 | 0.915109378  | 0.382998977 | 0.382998977 | -5.246033711 |
| 1447739_x_at | -0.08638722  | 5.893249201 | -0.915103422 | 0.383001947 | 0.383001947 | -5.246038498 |
| 1428301_at   | -0.324431897 | 9.933597828 | -0.915097972 | 0.383004664 | 0.383004664 | -5.246042878 |
| 1422275_at   | -0.113870682 | 4.889251289 | -0.915072228 | 0.383017498 | 0.383017498 | -5.246063569 |
| 1449509_at   | 0.058365036  | 9.40395341  | 0.914921981  | 0.383092409 | 0.383092409 | -5.246184316 |
| 1427102_at   | 0.06306278   | 4.560713278 | 0.914904062  | 0.383101344 | 0.383101344 | -5.246198715 |
| 1433584_at   | -0.091948075 | 4.626187762 | -0.914811708 | 0.383147396 | 0.383147396 | -5.246272927 |
| 1458159_at   | 0.06816784   | 6.926219653 | 0.914727207  | 0.383189536 | 0.383189536 | -5.246340823 |
| 1424376_at   | 0.116861623  | 7.75842728  | 0.914718571  | 0.383193843 | 0.383193843 | -5.246347762 |
| 1434950_a_at | 0.064032061  | 8.255470687 | 0.914686164  | 0.383210005 | 0.383210005 | -5.246373799 |
| 1438668_x_at | -0.118989211 | 8.120327265 | -0.914617136 | 0.383244432 | 0.383244432 | -5.246429257 |
| 1438055_at   | -0.088415511 | 3.839156197 | -0.914613087 | 0.383246452 | 0.383246452 | -5.24643251  |
| 1457399_at   | 0.132417815  | 4.921798471 | 0.914580405  | 0.383262753 | 0.383262753 | -5.246458766 |
| 1442308_at   | -0.076636115 | 6.428913048 | -0.91453975  | 0.383283031 | 0.383283031 | -5.246491426 |
| 1444636_at   | -0.061943723 | 3.922772119 | -0.914523457 | 0.383291158 | 0.383291158 | -5.246504515 |
| 1425100_a_at | 0.06467688   | 5.282541753 | 0.91450689   | 0.383299421 | 0.383299421 | -5.246517823 |
| 1425833_a_at | 0.127195274  | 4.330198835 | 0.914437786  | 0.383333892 | 0.383333892 | -5.246573333 |
| 1450816_at   | 0.086285574  | 7.450223138 | 0.914293452  | 0.383405898 | 0.383405898 | -5.246689263 |

|              |              |             |              |             |             |              |
|--------------|--------------|-------------|--------------|-------------|-------------|--------------|
| 1428383_a_at | -0.110966466 | 8.184567226 | -0.914288465 | 0.383408385 | 0.383408385 | -5.246693268 |
| 1443857_at   | 0.132317992  | 7.070643599 | 0.914192175  | 0.383456428 | 0.383456428 | -5.246770601 |
| 1438352_at   | -0.070233538 | 6.564103517 | -0.914181557 | 0.383461726 | 0.383461726 | -5.246779128 |
| 1435816_at   | 0.109100109  | 9.869625791 | 0.914154979  | 0.383474988 | 0.383474988 | -5.246800471 |
| 1454074_a_at | 0.057647361  | 10.53215863 | 0.914094802  | 0.383505015 | 0.383505015 | -5.246848795 |
| 1457682_at   | 0.080730567  | 8.32216275  | 0.914061706  | 0.38352153  | 0.38352153  | -5.246875372 |
| 1417874_at   | -0.079958244 | 8.651442504 | -0.914046632 | 0.383529053 | 0.383529053 | -5.246887476 |
| 1455143_at   | -0.144841316 | 9.138448125 | -0.914022322 | 0.383541184 | 0.383541184 | -5.246906996 |
| 1426600_at   | 0.091851133  | 8.891102736 | 0.91399499   | 0.383554824 | 0.383554824 | -5.246928942 |
| 1453237_at   | 0.068320764  | 4.530624312 | 0.913986564  | 0.383559029 | 0.383559029 | -5.246935708 |
| 1432612_at   | -0.082723478 | 3.774828695 | -0.913978953 | 0.383562828 | 0.383562828 | -5.246941819 |
| 1454816_at   | 0.089307374  | 6.586923175 | 0.913942907  | 0.383580817 | 0.383580817 | -5.246970761 |
| 1460692_at   | -0.133145473 | 10.08279215 | -0.913887531 | 0.383608454 | 0.383608454 | -5.247015221 |
| 1436563_at   | -0.079870996 | 4.309685625 | -0.913869417 | 0.383617495 | 0.383617495 | -5.247029764 |
| 1451236_at   | -0.11894199  | 7.617048176 | -0.913865543 | 0.383619429 | 0.383619429 | -5.247032875 |
| 1421863_at   | 0.094959409  | 6.414664795 | 0.913860013  | 0.383622188 | 0.383622188 | -5.247037314 |
| 1419176_at   | 0.074343618  | 8.108176077 | 0.913849331  | 0.38362752  | 0.38362752  | -5.24704589  |
| 1419325_at   | -0.065219511 | 4.42613783  | -0.913658125 | 0.383722963 | 0.383722963 | -5.247199385 |
| 1447836_x_at | -0.114129005 | 5.978078474 | -0.913634991 | 0.383734511 | 0.383734511 | -5.247217954 |
| 1436976_a_at | 0.160460344  | 6.747727592 | 0.913633252  | 0.38373538  | 0.38373538  | -5.24721935  |
| 1447968_at   | -0.077429171 | 3.242874127 | -0.913615252 | 0.383744366 | 0.383744366 | -5.247233798 |
| 1447729_s_at | 0.079694839  | 4.767448972 | 0.913554889  | 0.383774501 | 0.383774501 | -5.247282248 |
| 1417314_at   | -0.076332471 | 4.543214122 | -0.913490576 | 0.383806611 | 0.383806611 | -5.247333866 |
| 1422104_at   | 0.06169824   | 4.253877094 | 0.913448642  | 0.383827548 | 0.383827548 | -5.247367521 |
| 1433016_s_at | -0.092308901 | 4.661422432 | -0.913392362 | 0.383855649 | 0.383855649 | -5.247412687 |
| 1454440_at   | -0.066135914 | 3.670059286 | -0.913391459 | 0.383856101 | 0.383856101 | -5.247413412 |
| 1424833_at   | -0.060087229 | 4.135904536 | -0.913374874 | 0.383864382 | 0.383864382 | -5.247426721 |
| 1449936_at   | 0.069512815  | 6.049478057 | 0.913298312  | 0.383902613 | 0.383902613 | -5.24748816  |
| 1421689_at   | -0.090003922 | 3.594758865 | -0.913164923 | 0.383969228 | 0.383969228 | -5.24759519  |
| 1444375_at   | 0.058974396  | 3.932754777 | 0.913128904  | 0.383987218 | 0.383987218 | -5.24762409  |
| 1421840_at   | -0.071975595 | 10.54175631 | -0.913096468 | 0.384003418 | 0.384003418 | -5.247650114 |
| 1457370_at   | -0.073810346 | 7.789374398 | -0.913057196 | 0.384023034 | 0.384023034 | -5.247681621 |
| 1442878_at   | 0.082273469  | 5.962796308 | 0.913029762  | 0.384036737 | 0.384036737 | -5.24770363  |
| 1433504_at   | 0.081240372  | 9.642393205 | 0.912967609  | 0.384067783 | 0.384067783 | -5.247753491 |
| 1420533_at   | 0.084360338  | 6.338211566 | 0.912902894  | 0.38410011  | 0.38410011  | -5.247805404 |
| 1428380_at   | -0.086965352 | 9.026502329 | -0.912885274 | 0.384108913 | 0.384108913 | -5.247819538 |
| 1442579_at   | 0.062000814  | 3.296288012 | 0.91288445   | 0.384109325 | 0.384109325 | -5.247820199 |
| 1454448_at   | -0.07587356  | 3.435228262 | -0.912838721 | 0.38413217  | 0.38413217  | -5.24785688  |
| 1447659_x_at | 0.07983024   | 3.088388234 | 0.912653833  | 0.384224544 | 0.384224544 | -5.248005168 |
| 1416815_s_at | 0.070437369  | 11.25552027 | 0.912562705  | 0.38427008  | 0.38427008  | -5.248078248 |
| 1428650_at   | -0.071982079 | 8.429524428 | -0.912547859 | 0.384277499 | 0.384277499 | -5.248090153 |
| 1447088_at   | -0.060803649 | 4.808192221 | -0.912454469 | 0.38432417  | 0.38432417  | -5.24816504  |
| 1425659_at   | 0.091191982  | 4.31501666  | 0.912411218  | 0.384345786 | 0.384345786 | -5.24819972  |
| 1429676_at   | -0.095579119 | 4.508291441 | -0.912398991 | 0.384351897 | 0.384351897 | -5.248209524 |
| 1421464_at   | 0.086315179  | 3.871133504 | 0.912376972  | 0.384362902 | 0.384362902 | -5.248227178 |
| 1458430_at   | 0.061185781  | 4.0120774   | 0.912361602  | 0.384370584 | 0.384370584 | -5.248239501 |
| 1432354_at   | -0.063382136 | 3.575932031 | -0.912347269 | 0.384377748 | 0.384377748 | -5.248250993 |
| 1445841_at   | 0.061978095  | 3.712449366 | 0.912342265  | 0.384380249 | 0.384380249 | -5.248255005 |
| 1447773_x_at | -0.072597812 | 5.426157874 | -0.912313579 | 0.384394587 | 0.384394587 | -5.248278004 |
| 1437605_at   | 0.061623968  | 3.353158074 | 0.912293522  | 0.384404612 | 0.384404612 | -5.248294084 |
| 1425098_at   | 0.090008853  | 3.593318313 | 0.912286614  | 0.384408064 | 0.384408064 | -5.248299622 |
| 1456807_at   | 0.056473349  | 4.053797469 | 0.912284192  | 0.384409275 | 0.384409275 | -5.248301564 |
| 1423185_a_at | -0.062826306 | 8.206520815 | -0.912198389 | 0.384452165 | 0.384452165 | -5.248370351 |

|              |              |             |              |             |             |              |
|--------------|--------------|-------------|--------------|-------------|-------------|--------------|
| 1435664_at   | 0.114171848  | 7.21692177  | 0.912086702  | 0.384507998 | 0.384507998 | -5.248459881 |
| 1419939_at   | -0.08184926  | 5.005506334 | -0.912070868 | 0.384515914 | 0.384515914 | -5.248472573 |
| 1459212_at   | -0.080099347 | 4.197193917 | -0.911969574 | 0.384566557 | 0.384566557 | -5.248553763 |
| 1437742_at   | 0.073708281  | 6.258859864 | 0.911954734  | 0.384573978 | 0.384573978 | -5.248565658 |
| 1418370_at   | -0.473904188 | 9.055710826 | -0.911952195 | 0.384575247 | 0.384575247 | -5.248567692 |
| 1431538_at   | 0.084254485  | 3.899845144 | 0.911922257  | 0.384590216 | 0.384590216 | -5.248591687 |
| 1457762_at   | -0.13099498  | 6.200564735 | -0.91166209  | 0.384720318 | 0.384720318 | -5.248800175 |
| 1443457_at   | -0.113087433 | 4.841082136 | -0.911591281 | 0.384755733 | 0.384755733 | -5.24885691  |
| 1448718_at   | -0.062483474 | 8.406133072 | -0.911482168 | 0.38481031  | 0.38481031  | -5.248944329 |
| 1440361_at   | -0.099815605 | 4.472212578 | -0.911348373 | 0.38487724  | 0.38487724  | -5.249051511 |
| 1438486_at   | 0.104021828  | 3.745084971 | 0.911212346  | 0.384945296 | 0.384945296 | -5.249160469 |
| 1419296_at   | 0.10201431   | 5.156735676 | 0.911185817  | 0.384958569 | 0.384958569 | -5.249181716 |
| 1443634_at   | -0.064375504 | 3.308329221 | -0.911160188 | 0.384971393 | 0.384971393 | -5.249202244 |
| 1446966_at   | 0.086280261  | 3.751059852 | 0.911078222  | 0.385012407 | 0.385012407 | -5.249267888 |
| 1430763_at   | -0.080814928 | 6.433032611 | -0.911068425 | 0.38501731  | 0.38501731  | -5.249275735 |
| 1430505_at   | 0.099804612  | 5.441578568 | 0.911023992  | 0.385039545 | 0.385039545 | -5.249311317 |
| 1442399_at   | 0.085940092  | 6.584846665 | 0.911005876  | 0.385048611 | 0.385048611 | -5.249325825 |
| 1458632_at   | 0.07493752   | 4.515344669 | 0.910932216  | 0.385085474 | 0.385085474 | -5.24938481  |
| 1459656_at   | 0.069851906  | 3.82263342  | 0.910924398  | 0.385089386 | 0.385089386 | -5.24939107  |
| 1460669_at   | 0.059965459  | 10.31211493 | 0.910799809  | 0.385151744 | 0.385151744 | -5.249490828 |
| 1428901_at   | -0.0821397   | 5.908949073 | -0.910688425 | 0.385207497 | 0.385207497 | -5.249580003 |
| 1442869_at   | 0.072528122  | 4.604250861 | 0.910641104  | 0.385231186 | 0.385231186 | -5.249617886 |
| 1433601_at   | 0.080129152  | 3.766108264 | 0.910606017  | 0.385248751 | 0.385248751 | -5.249645975 |
| 1433897_at   | -0.081587073 | 11.03437748 | -0.910594275 | 0.385254629 | 0.385254629 | -5.249655374 |
| 1438080_at   | 0.077139069  | 4.780454317 | 0.910549682  | 0.385276954 | 0.385276954 | -5.24969107  |
| 1460618_x_at | 0.063445984  | 3.808496113 | 0.9105332    | 0.385285206 | 0.385285206 | -5.249704264 |
| 1436219_at   | -0.085838776 | 7.062044657 | -0.910532627 | 0.385285493 | 0.385285493 | -5.249704722 |
| 1435200_at   | -0.079194427 | 4.069627378 | -0.910521006 | 0.385291311 | 0.385291311 | -5.249714024 |
| 1432742_at   | -0.070743067 | 4.307459645 | -0.91044726  | 0.385328234 | 0.385328234 | -5.249773053 |
| 1446926_at   | 0.104233264  | 4.398153471 | 0.910305863  | 0.385399035 | 0.385399035 | -5.249886219 |
| 1429822_at   | 0.126481393  | 7.374576524 | 0.910248976  | 0.385427523 | 0.385427523 | -5.249931745 |
| 1434691_at   | 0.078405387  | 8.437739201 | 0.91021393   | 0.385445073 | 0.385445073 | -5.24995979  |
| 1435434_at   | -0.060440922 | 8.81770986  | -0.910212061 | 0.38544601  | 0.38544601  | -5.249961286 |
| 1430293_a_at | 0.073199366  | 8.512971012 | 0.910209779  | 0.385447152 | 0.385447152 | -5.249963112 |
| 1433835_at   | 0.092175739  | 9.878639244 | 0.910125054  | 0.385489584 | 0.385489584 | -5.250030908 |
| 1432755_at   | 0.0675064    | 4.314896899 | 0.910110956  | 0.385496645 | 0.385496645 | -5.250042189 |
| 1442976_at   | -0.061472347 | 4.067998378 | -0.910099404 | 0.385502431 | 0.385502431 | -5.250051432 |
| 1424921_at   | -0.076655529 | 6.147643548 | -0.91009077  | 0.385506756 | 0.385506756 | -5.250058341 |
| 1449731_s_at | 0.088548946  | 9.635657724 | 0.9100521    | 0.385526124 | 0.385526124 | -5.250089282 |
| 1457462_at   | -0.146383623 | 4.753255917 | -0.910035754 | 0.385534312 | 0.385534312 | -5.250102361 |
| 1454221_a_at | 0.066256283  | 7.585680099 | 0.910033438  | 0.385535472 | 0.385535472 | -5.250104214 |
| 1448082_at   | -0.071421789 | 3.189478577 | -0.910028466 | 0.385537962 | 0.385537962 | -5.250108192 |
| 1449494_at   | 0.101288185  | 3.842758492 | 0.909981327  | 0.385561574 | 0.385561574 | -5.250145907 |
| 1426124_a_at | 0.063571927  | 11.37039013 | 0.909958221  | 0.385573148 | 0.385573148 | -5.250164393 |
| 1424634_at   | -0.064770499 | 8.629380859 | -0.909852618 | 0.385626049 | 0.385626049 | -5.250248877 |
| 1421653_a_at | -0.115225691 | 5.504455545 | -0.909837583 | 0.385633581 | 0.385633581 | -5.250260904 |
| 1453348_at   | 0.090667438  | 4.305935001 | 0.909819769  | 0.385642506 | 0.385642506 | -5.250275154 |
| 1422296_at   | 0.07767514   | 3.437604232 | 0.909767093  | 0.385668896 | 0.385668896 | -5.250317291 |
| 1446316_at   | 0.072584576  | 3.977300341 | 0.909743439  | 0.385680747 | 0.385680747 | -5.250336212 |
| 1446167_at   | 0.061279902  | 6.844251378 | 0.909742848  | 0.385681044 | 0.385681044 | -5.250336685 |
| 1444769_at   | -0.1147348   | 4.239405787 | -0.90964641  | 0.385729363 | 0.385729363 | -5.250413822 |
| 1460720_at   | -0.077545928 | 9.486860486 | -0.909625755 | 0.385739713 | 0.385739713 | -5.250430342 |
| 1436264_at   | 0.072520608  | 4.189037705 | 0.909615232  | 0.385744986 | 0.385744986 | -5.250438759 |



|              |              |             |              |             |             |              |
|--------------|--------------|-------------|--------------|-------------|-------------|--------------|
| 1427130_x_at | -0.072724564 | 3.935478639 | -0.90957683  | 0.385764228 | 0.385764228 | -5.250469471 |
| 1440322_at   | 0.105961712  | 4.2624381   | 0.909439634  | 0.385832981 | 0.385832981 | -5.250579191 |
| 1452164_at   | -0.056168645 | 8.147492593 | -0.90927533  | 0.38591533  | 0.38591533  | -5.250710571 |
| 1433554_at   | 0.054909961  | 9.738417169 | 0.909236294  | 0.385934897 | 0.385934897 | -5.250741782 |
| 1441592_at   | -0.077369519 | 7.251205739 | -0.909151339 | 0.385977483 | 0.385977483 | -5.250809704 |
| 1438903_at   | -0.064846998 | 3.980987462 | -0.909141715 | 0.385982307 | 0.385982307 | -5.250817398 |
| 1456460_at   | 0.090691905  | 6.339110761 | 0.909135037  | 0.385985655 | 0.385985655 | -5.250822736 |
| 1451898_a_at | -0.089723767 | 8.309093169 | -0.909084856 | 0.386010811 | 0.386010811 | -5.250862853 |
| 1442485_at   | -0.062315296 | 3.799227146 | -0.909031907 | 0.386037356 | 0.386037356 | -5.25090518  |
| 1417182_at   | 0.073894625  | 8.060757432 | 0.908948448  | 0.3860792   | 0.3860792   | -5.250971894 |
| 1444419_at   | 0.079221338  | 6.040996693 | 0.908909801  | 0.386098578 | 0.386098578 | -5.251002784 |
| 1452457_a_at | 0.066479607  | 7.894380451 | 0.908898501  | 0.386104244 | 0.386104244 | -5.251011817 |
| 1455558_at   | -0.062877527 | 8.314619115 | -0.908860855 | 0.38612312  | 0.38612312  | -5.251041906 |
| 1427300_at   | -0.091252983 | 10.4156409  | -0.908732044 | 0.386187714 | 0.386187714 | -5.251144854 |
| 1436331_at   | -0.069189819 | 6.50663342  | -0.908647359 | 0.386230184 | 0.386230184 | -5.251212528 |
| 1455030_at   | -0.097616902 | 5.451810482 | -0.908545726 | 0.386281158 | 0.386281158 | -5.251293741 |
| 1434051_s_at | -0.066240319 | 6.057534555 | -0.90846024  | 0.386324037 | 0.386324037 | -5.251362044 |
| 1440918_at   | -0.122735824 | 4.629100377 | -0.908368595 | 0.38637001  | 0.38637001  | -5.251435263 |
| 1446957_s_at | 0.080886759  | 8.914964168 | 0.90835173   | 0.38637847  | 0.38637847  | -5.251448736 |
| 1437726_x_at | -0.163703296 | 7.194852222 | -0.908298124 | 0.386405363 | 0.386405363 | -5.251491561 |
| 1458626_at   | 0.081353349  | 3.837617813 | 0.908157221  | 0.386476058 | 0.386476058 | -5.251604115 |
| 1451929_a_at | -0.080201407 | 6.487990739 | -0.908123396 | 0.38649303  | 0.38649303  | -5.251631133 |
| 1455399_at   | -0.070305526 | 5.912528368 | -0.908117925 | 0.386495775 | 0.386495775 | -5.251635502 |
| 1451773_s_at | 0.071796702  | 6.273969977 | 0.908099638  | 0.386504951 | 0.386504951 | -5.251650108 |
| 1439830_at   | 0.088376027  | 7.804183026 | 0.908093686  | 0.386507938 | 0.386507938 | -5.251654863 |
| 1422714_at   | 0.078572221  | 9.623318043 | 0.908021756  | 0.386544032 | 0.386544032 | -5.251712312 |
| 1419863_at   | -0.09351802  | 3.870383505 | -0.907983546 | 0.386563207 | 0.386563207 | -5.251742828 |
| 1438037_at   | -0.105851976 | 5.166253724 | -0.907977057 | 0.386566463 | 0.386566463 | -5.25174801  |
| 1420224_at   | 0.060135958  | 3.295432969 | 0.907968544  | 0.386570735 | 0.386570735 | -5.251754808 |
| 1456049_at   | 0.076305011  | 6.46233355  | 0.907945405  | 0.386582348 | 0.386582348 | -5.251773288 |
| 1458034_at   | 0.096749839  | 3.947972815 | 0.907865954  | 0.386622222 | 0.386622222 | -5.251836735 |
| 1443700_at   | -0.071852578 | 4.014285518 | -0.907838449 | 0.386636027 | 0.386636027 | -5.251858699 |
| 1432379_at   | -0.053715466 | 3.159488791 | -0.907768794 | 0.386670988 | 0.386670988 | -5.251914319 |
| 1438895_at   | -0.067245425 | 9.284886131 | -0.907661827 | 0.386724681 | 0.386724681 | -5.251999725 |
| 1433149_at   | -0.071630771 | 4.099659974 | -0.907649954 | 0.386730641 | 0.386730641 | -5.252009204 |
| 1416448_at   | 0.067311576  | 8.884877346 | 0.907627773  | 0.386741776 | 0.386741776 | -5.252026913 |
| 1435257_at   | -0.091314406 | 8.409382021 | -0.907618724 | 0.386746318 | 0.386746318 | -5.252034137 |
| 1458633_at   | -0.063742472 | 6.602411761 | -0.907579154 | 0.386766183 | 0.386766183 | -5.252065729 |
| 1422747_at   | -0.068508102 | 7.175046775 | -0.907559796 | 0.386775901 | 0.386775901 | -5.252081182 |
| 1433110_at   | 0.208851719  | 7.257183229 | 0.90747175   | 0.386820105 | 0.386820105 | -5.252151469 |
| 1427849_a_at | 0.061964397  | 4.3209559   | 0.907456954  | 0.386827534 | 0.386827534 | -5.25216328  |
| 1429758_at   | -0.08603364  | 7.834855393 | -0.90742903  | 0.386841554 | 0.386841554 | -5.25218557  |
| 1445443_at   | 0.095143987  | 7.49110257  | 0.907414817  | 0.38684869  | 0.38684869  | -5.252196915 |
| 1436734_at   | 0.071393994  | 4.123186559 | 0.907368074  | 0.38687216  | 0.38687216  | -5.252234226 |
| 1446478_at   | -0.061104469 | 3.112724526 | -0.907356693 | 0.386877875 | 0.386877875 | -5.25224331  |
| 1445437_at   | 0.074434383  | 5.031282606 | 0.907322147  | 0.386895222 | 0.386895222 | -5.252270883 |
| 1460071_at   | 0.069821157  | 5.054561905 | 0.907317745  | 0.386897432 | 0.386897432 | -5.252274397 |
| 1430275_a_at | 0.109398365  | 5.754700943 | 0.907276851  | 0.386917968 | 0.386917968 | -5.252307036 |
| 1438773_at   | 0.119943736  | 5.404429988 | 0.90723688   | 0.386938039 | 0.386938039 | -5.252338937 |
| 1455681_at   | -0.080410778 | 8.294659625 | -0.907055933 | 0.387028915 | 0.387028915 | -5.252483338 |
| 1447857_at   | -0.069530847 | 4.398546872 | -0.907053616 | 0.387030079 | 0.387030079 | -5.252485187 |
| 1421100_a_at | 0.079007395  | 3.753416728 | 0.907022048  | 0.387045935 | 0.387045935 | -5.252510377 |
| 1436541_at   | -0.069190328 | 8.079528089 | -0.907020823 | 0.38704655  | 0.38704655  | -5.252511354 |

|              |              |             |              |             |             |              |
|--------------|--------------|-------------|--------------|-------------|-------------|--------------|
| 1429804_at   | -0.081542012 | 5.845469911 | -0.906938331 | 0.387087986 | 0.387087986 | -5.252577175 |
| 1445126_at   | -0.056722485 | 4.493676175 | -0.906906697 | 0.387103877 | 0.387103877 | -5.252602415 |
| 1416739_a_at | -0.103567975 | 5.202064387 | -0.90672719  | 0.387194057 | 0.387194057 | -5.252745624 |
| 1429221_at   | 0.062588802  | 3.556181283 | 0.906708739  | 0.387203327 | 0.387203327 | -5.252760342 |
| 1458602_at   | -0.071940794 | 4.988177997 | -0.906698801 | 0.38720832  | 0.38720832  | -5.25276827  |
| 1424708_at   | -0.068774321 | 10.75700776 | -0.906674071 | 0.387220745 | 0.387220745 | -5.252787997 |
| 1456517_at   | 0.093125263  | 5.551238344 | 0.906574148  | 0.387270953 | 0.387270953 | -5.252867701 |
| 1452003_at   | 0.081173811  | 4.998914392 | 0.906541132  | 0.387287544 | 0.387287544 | -5.252894035 |
| 1447523_at   | 0.066656547  | 5.843669789 | 0.906518086  | 0.387299125 | 0.387299125 | -5.252912416 |
| 1432179_x_at | 0.057572807  | 4.191924197 | 0.906485701  | 0.387315399 | 0.387315399 | -5.252938245 |
| 1454167_at   | -0.087426492 | 4.767096926 | -0.906480452 | 0.387318037 | 0.387318037 | -5.252942431 |
| 1453644_at   | 0.066338495  | 3.33489423  | 0.906363999  | 0.387376561 | 0.387376561 | -5.253035303 |
| 1432345_at   | -0.080574448 | 4.940356517 | -0.906130149 | 0.387494104 | 0.387494104 | -5.253221771 |
| 1450364_a_at | 0.076509814  | 3.98434141  | 0.906126308  | 0.387496034 | 0.387496034 | -5.253224833 |
| 1440686_at   | 0.063172257  | 3.918638365 | 0.906082726  | 0.387517944 | 0.387517944 | -5.253259581 |
| 1426122_a_at | 0.074046639  | 3.987579603 | 0.906042759  | 0.387538036 | 0.387538036 | -5.253291444 |
| 1432795_at   | 0.099067447  | 3.75243973  | 0.906034109  | 0.387542385 | 0.387542385 | -5.25329834  |
| 1431126_a_at | 0.059491334  | 8.141806178 | 0.905983393  | 0.387567882 | 0.387567882 | -5.253338771 |
| 1445778_at   | -0.073098005 | 4.653597943 | -0.905982245 | 0.387568459 | 0.387568459 | -5.253339687 |
| 1459363_at   | -0.068445018 | 8.682465149 | -0.90596879  | 0.387575224 | 0.387575224 | -5.253350413 |
| 1458209_at   | -0.063888409 | 4.987166116 | -0.905959705 | 0.387579792 | 0.387579792 | -5.253357655 |
| 1450711_at   | -0.076426336 | 10.4362565  | -0.905897936 | 0.387610849 | 0.387610849 | -5.253406895 |
| 1428545_at   | -0.100193925 | 8.3262592   | -0.905825527 | 0.387647257 | 0.387647257 | -5.253464612 |
| 1452967_at   | 0.075894589  | 3.989824631 | 0.90582381   | 0.387648121 | 0.387648121 | -5.253465981 |
| 1453935_a_at | 0.066046173  | 3.409164461 | 0.905801855  | 0.38765916  | 0.38765916  | -5.25348348  |
| 1436156_at   | -0.073807174 | 9.783325966 | -0.905716547 | 0.387702059 | 0.387702059 | -5.253551473 |
| 1423383_a_at | 0.084189658  | 9.438458201 | 0.905715624  | 0.387702523 | 0.387702523 | -5.253552209 |
| 1437178_at   | -0.081162452 | 3.326250118 | -0.905672705 | 0.387724107 | 0.387724107 | -5.253586415 |
| 1430380_at   | 0.076288905  | 5.006648133 | 0.905640992  | 0.387740055 | 0.387740055 | -5.253611688 |
| 1417423_at   | 0.096946557  | 8.839990474 | 0.905637671  | 0.387741726 | 0.387741726 | -5.253614335 |
| 1447888_x_at | 0.064698431  | 3.585139369 | 0.905595476  | 0.387762947 | 0.387762947 | -5.253647962 |
| 1433963_a_at | 0.1599978    | 5.474179489 | 0.905593037  | 0.387764174 | 0.387764174 | -5.253649905 |
| 1439775_at   | -0.096694152 | 7.620469713 | -0.905508668 | 0.387806608 | 0.387806608 | -5.253717137 |
| 1417821_at   | 0.055498039  | 8.890789778 | 0.905498962  | 0.38781149  | 0.38781149  | -5.253724871 |
| 1432545_at   | 0.087571941  | 4.242950487 | 0.905458101  | 0.387832043 | 0.387832043 | -5.253757431 |
| 1430685_at   | -0.071983531 | 5.359552544 | -0.905456501 | 0.387832848 | 0.387832848 | -5.253758705 |
| 1424063_at   | 0.062613011  | 5.114369087 | 0.905424057  | 0.387849168 | 0.387849168 | -5.253784557 |
| 1428224_at   | 0.172492542  | 8.039669472 | 0.905357234  | 0.387882782 | 0.387882782 | -5.253837799 |
| 1416155_at   | 0.063740447  | 10.58507913 | 0.905248007  | 0.387937732 | 0.387937732 | -5.25392482  |
| 1417095_a_at | 0.064518577  | 6.122043461 | 0.905240911  | 0.387941302 | 0.387941302 | -5.253930473 |
| 1421107_at   | 0.074054795  | 5.907379056 | 0.905230757  | 0.387946411 | 0.387946411 | -5.253938563 |
| 1443927_at   | 0.054982681  | 3.263746397 | 0.905227135  | 0.387948233 | 0.387948233 | -5.253941448 |
| 1458877_at   | -0.061375264 | 3.527878382 | -0.905178763 | 0.38797257  | 0.38797257  | -5.253979983 |
| 1434895_s_at | 0.056532748  | 8.261495677 | 0.905175999  | 0.387973961 | 0.387973961 | -5.253982185 |
| 1445302_at   | -0.059705072 | 7.304971487 | -0.905108233 | 0.388008057 | 0.388008057 | -5.254036166 |
| 1446635_at   | 0.10182508   | 4.05254476  | 0.9050122    | 0.38805638  | 0.38805638  | -5.254112659 |
| 1452334_at   | -0.07639137  | 6.071472365 | -0.904986707 | 0.388069209 | 0.388069209 | -5.254132964 |
| 1447276_at   | 0.110329962  | 4.087260373 | 0.904907177  | 0.388109232 | 0.388109232 | -5.254196305 |
| 1431016_at   | -0.072794589 | 6.790309719 | -0.904853863 | 0.388136063 | 0.388136063 | -5.254238764 |
| 1417247_at   | 0.060834702  | 8.582021845 | 0.904728196  | 0.388199313 | 0.388199313 | -5.254338837 |
| 1419278_at   | -0.070153727 | 8.651367136 | -0.90471877  | 0.388204058 | 0.388204058 | -5.254346343 |
| 1455007_s_at | 0.072140102  | 7.296531042 | 0.904674504  | 0.38822634  | 0.38822634  | -5.25438159  |
| 1455441_at   | -0.210318869 | 8.64272494  | -0.904662516 | 0.388232374 | 0.388232374 | -5.254391135 |

|              |              |             |              |             |             |              |
|--------------|--------------|-------------|--------------|-------------|-------------|--------------|
| 1443890_at   | 0.066772911  | 6.888925179 | 0.904654333  | 0.388236493 | 0.388236493 | -5.254397651 |
| 1455736_at   | -0.085368401 | 4.114927339 | -0.904648896 | 0.38823923  | 0.38823923  | -5.25440198  |
| 1432506_at   | -0.067519742 | 4.746525762 | -0.904519164 | 0.388304539 | 0.388304539 | -5.254505271 |
| 1425734_a_at | -0.085277827 | 6.708478047 | -0.904454009 | 0.388337341 | 0.388337341 | -5.254557141 |
| 1442598_at   | 0.079255351  | 4.29738036  | 0.904444937  | 0.388341909 | 0.388341909 | -5.254564364 |
| 1436421_s_at | 0.107655414  | 8.959700788 | 0.904426891  | 0.388350995 | 0.388350995 | -5.25457873  |
| 1417772_at   | -0.08287234  | 8.269670944 | -0.904404943 | 0.388362045 | 0.388362045 | -5.254596202 |
| 1456812_at   | 0.083668257  | 3.725726413 | 0.904306764  | 0.38841148  | 0.38841148  | -5.254674354 |
| 1441588_at   | 0.183530454  | 7.161626688 | 0.90425225   | 0.388438931 | 0.388438931 | -5.254717745 |
| 1442255_at   | -0.080393178 | 6.183942581 | -0.904220746 | 0.388454795 | 0.388454795 | -5.25474282  |
| 1456537_at   | 0.110320781  | 5.052379313 | 0.904207776  | 0.388461327 | 0.388461327 | -5.254753144 |
| 1440827_x_at | 0.099510699  | 3.807896294 | 0.904193445  | 0.388468544 | 0.388468544 | -5.25476455  |
| 1425588_at   | -0.085332775 | 4.098744395 | -0.90417278  | 0.38847895  | 0.38847895  | -5.254780997 |
| 1431396_at   | -0.066610222 | 4.936446649 | -0.904056429 | 0.388537548 | 0.388537548 | -5.254873595 |
| 1418341_at   | -0.100148555 | 6.663305885 | -0.904036303 | 0.388547685 | 0.388547685 | -5.254889611 |
| 1449804_at   | -0.075774823 | 7.260164182 | -0.904028742 | 0.388551493 | 0.388551493 | -5.254895627 |
| 1415874_at   | 0.109768533  | 9.22028447  | 0.903970794  | 0.38858068  | 0.38858068  | -5.25494174  |
| 1431154_at   | -0.079386058 | 4.686258086 | -0.903965584 | 0.388583305 | 0.388583305 | -5.254945886 |
| 1432427_at   | -0.057355839 | 4.334868117 | -0.903964217 | 0.388583993 | 0.388583993 | -5.254946974 |
| 1420122_at   | 0.063608732  | 3.12935272  | 0.903956579  | 0.38858784  | 0.38858784  | -5.254953051 |
| 1423709_s_at | 0.056840828  | 10.06802951 | 0.903928351  | 0.388602059 | 0.388602059 | -5.254975514 |
| 1423636_at   | -0.126846687 | 5.852984815 | -0.903904367 | 0.38861414  | 0.38861414  | -5.254994597 |
| 1459495_at   | -0.097614079 | 5.880555366 | -0.90388057  | 0.388626128 | 0.388626128 | -5.255013532 |
| 1458372_at   | -0.059003194 | 7.634557589 | -0.903846951 | 0.388643063 | 0.388643063 | -5.255040282 |
| 1418815_at   | -0.078110832 | 9.77977908  | -0.903717278 | 0.38870839  | 0.38870839  | -5.255143451 |
| 1456778_at   | -0.077724436 | 9.178447888 | -0.903704339 | 0.388714909 | 0.388714909 | -5.255153744 |
| 1439379_x_at | 0.061370225  | 3.099489973 | 0.903682882  | 0.38872572  | 0.38872572  | -5.255170815 |
| 1452583_s_at | 0.092945499  | 7.724774455 | 0.903618912  | 0.38875795  | 0.38875795  | -5.255221703 |
| 1452998_at   | -0.073798406 | 3.908368654 | -0.903575922 | 0.388779612 | 0.388779612 | -5.255255901 |
| 1457343_at   | 0.162033032  | 5.352126094 | 0.903536571  | 0.388799441 | 0.388799441 | -5.255287202 |
| 1419022_a_at | -0.076149803 | 12.26132084 | -0.903515131 | 0.388810244 | 0.388810244 | -5.255304256 |
| 1425657_at   | 0.062994767  | 3.486847323 | 0.903489277  | 0.388823272 | 0.388823272 | -5.255324821 |
| 1453683_a_at | 0.111207387  | 6.022590763 | 0.903407701  | 0.388864381 | 0.388864381 | -5.255389703 |
| 1420787_at   | 0.06308506   | 3.379432064 | 0.903383692  | 0.388876481 | 0.388876481 | -5.255408798 |
| 1437519_x_at | 0.063154371  | 8.035117871 | 0.903381307  | 0.388877683 | 0.388877683 | -5.255410695 |
| 1443028_at   | -0.068023061 | 4.6791727   | -0.903367829 | 0.388884475 | 0.388884475 | -5.255421414 |
| 1428182_at   | -0.066101562 | 10.09546377 | -0.903320261 | 0.388908449 | 0.388908449 | -5.255459245 |
| 1441553_at   | -0.074419567 | 5.882023478 | -0.903267929 | 0.388934825 | 0.388934825 | -5.255500862 |
| 1418094_s_at | -0.070625252 | 3.925937021 | -0.903242707 | 0.388947537 | 0.388947537 | -5.255520919 |
| 1453269_at   | 0.135276342  | 7.24484364  | 0.903074829  | 0.38903216  | 0.38903216  | -5.255654409 |
| 1432254_at   | 0.079200767  | 3.803418047 | 0.903071381  | 0.389033898 | 0.389033898 | -5.25565715  |
| 1420539_a_at | -0.070858489 | 4.918841722 | -0.902981169 | 0.389079377 | 0.389079377 | -5.255728875 |
| 1436927_at   | -0.069059441 | 3.555938216 | -0.902916838 | 0.389111811 | 0.389111811 | -5.255780017 |
| 1435335_a_at | 0.07953343   | 7.683592463 | 0.902880545  | 0.389130109 | 0.389130109 | -5.255808869 |
| 1435872_at   | -0.109301623 | 6.624332442 | -0.902864539 | 0.38913818  | 0.38913818  | -5.255821593 |
| 1450317_at   | -0.065972862 | 3.493634268 | -0.902803229 | 0.389169094 | 0.389169094 | -5.25587033  |
| 1456033_at   | 0.102658225  | 4.318585112 | 0.902802038  | 0.389169694 | 0.389169694 | -5.255871277 |
| 1429407_at   | -0.11036467  | 5.860503637 | -0.90278665  | 0.389177453 | 0.389177453 | -5.255883509 |
| 1458030_at   | 0.078315414  | 3.736344858 | 0.902758584  | 0.389191606 | 0.389191606 | -5.255905818 |
| 1439859_at   | 0.107109335  | 5.650094567 | 0.90271922   | 0.389211456 | 0.389211456 | -5.255937107 |
| 1453299_a_at | 0.078854175  | 8.068110366 | 0.902691562  | 0.389225403 | 0.389225403 | -5.25595909  |
| 1446615_at   | -0.079308178 | 7.132987046 | -0.902649129 | 0.389246802 | 0.389246802 | -5.255992816 |
| 1422529_s_at | -0.320020891 | 7.307636448 | -0.902637226 | 0.389252805 | 0.389252805 | -5.256002276 |

|                    |              |             |              |             |             |              |
|--------------------|--------------|-------------|--------------|-------------|-------------|--------------|
| 1418439_at         | -0.055489392 | 10.03409358 | -0.902624673 | 0.389259135 | 0.389259135 | -5.256012253 |
| 1434923_at         | -0.066851464 | 9.527585959 | -0.902610037 | 0.389266517 | 0.389266517 | -5.256023885 |
| 1456030_at         | -0.12074153  | 4.464468149 | -0.902602953 | 0.38927009  | 0.38927009  | -5.256029516 |
| 1444379_at         | 0.072126878  | 5.841799415 | 0.902502944  | 0.389320529 | 0.389320529 | -5.256108994 |
| 1431555_at         | 0.104925686  | 4.156584324 | 0.902226272  | 0.389460094 | 0.389460094 | -5.256328834 |
| 1426642_at         | -0.083443904 | 11.92292015 | -0.902179652 | 0.389483614 | 0.389483614 | -5.256365872 |
| 1421049_at         | -0.068478042 | 5.84585757  | -0.902164656 | 0.38949118  | 0.38949118  | -5.256377786 |
| 1437239_x_at       | 0.084757384  | 9.435986817 | 0.902115468  | 0.389515997 | 0.389515997 | -5.256416861 |
| 1439012_a_at       | 0.106561958  | 8.866228505 | 0.902097139  | 0.389525246 | 0.389525246 | -5.256431422 |
| 1452443_s_at       | -0.087953548 | 8.704562908 | -0.902018697 | 0.389564826 | 0.389564826 | -5.256493733 |
| 1450212_at         | -0.069146806 | 4.890501455 | -0.901946087 | 0.389601466 | 0.389601466 | -5.256551408 |
| 1454092_a_at       | 0.068370486  | 8.139901684 | 0.901843585  | 0.389653195 | 0.389653195 | -5.25663282  |
| 1450964_a_at       | 0.060954216  | 9.252330479 | 0.901753896  | 0.389698461 | 0.389698461 | -5.256704049 |
| 1445555_at         | -0.080516355 | 4.18411886  | -0.901701139 | 0.389725089 | 0.389725089 | -5.256745945 |
| 1421106_at         | 0.128699888  | 7.361706159 | 0.9016998    | 0.389725765 | 0.389725765 | -5.256747008 |
| 1441385_at         | -0.071452716 | 4.028326388 | -0.901677076 | 0.389737235 | 0.389737235 | -5.256765053 |
| 1416937_at         | -0.061873525 | 11.37100659 | -0.901657542 | 0.389747095 | 0.389747095 | -5.256780565 |
| 1429067_at         | -0.101224166 | 4.501766756 | -0.901650116 | 0.389750844 | 0.389750844 | -5.256786461 |
| 1417691_at         | 0.063721421  | 8.403226653 | 0.901648174  | 0.389751824 | 0.389751824 | -5.256788004 |
| 1457488_at         | 0.080120527  | 6.699052847 | 0.90160507   | 0.389773582 | 0.389773582 | -5.25682223  |
| 1434809_at         | 0.07891787   | 9.787381307 | 0.901527668  | 0.389812655 | 0.389812655 | -5.256883688 |
| 1444912_at         | 0.088237904  | 5.560301032 | 0.901513959  | 0.389819576 | 0.389819576 | -5.256894573 |
| 1425065_at         | -0.081521929 | 5.597684978 | -0.90139802  | 0.389878109 | 0.389878109 | -5.25698662  |
| 1441537_at         | -0.084401426 | 4.778374759 | -0.901377835 | 0.3898883   | 0.3898883   | -5.257002644 |
| 1427046_at         | 0.083391157  | 8.415416636 | 0.901255425  | 0.389950108 | 0.389950108 | -5.257099817 |
| AFFX-TransRecMur/) | 0.058073102  | 4.077786758 | 0.901187576  | 0.38998437  | 0.38998437  | -5.257153673 |
| 1442865_at         | -0.086629112 | 4.688648777 | -0.90107736  | 0.39004003  | 0.39004003  | -5.257241151 |
| 1438578_a_at       | 0.062325959  | 8.560735085 | 0.901000387  | 0.390078906 | 0.390078906 | -5.257302239 |
| 1429021_at         | 0.098396576  | 8.730730459 | 0.900920624  | 0.390119193 | 0.390119193 | -5.257365536 |
| 1416665_at         | -0.065347173 | 9.075762054 | -0.90089537  | 0.390131949 | 0.390131949 | -5.257385576 |
| 1422801_at         | -0.067566987 | 10.36692189 | -0.900880209 | 0.390139608 | 0.390139608 | -5.257397607 |
| 1441630_at         | -0.17692591  | 6.547062683 | -0.90086866  | 0.390145442 | 0.390145442 | -5.257406771 |
| 1451633_a_at       | -0.080285551 | 3.515111059 | -0.900848473 | 0.390155639 | 0.390155639 | -5.257422789 |
| 1445049_at         | -0.106767206 | 5.385148507 | -0.900829195 | 0.390165377 | 0.390165377 | -5.257438086 |
| 1441832_at         | -0.054838513 | 3.130811883 | -0.900817343 | 0.390171364 | 0.390171364 | -5.257447491 |
| 1436877_at         | 0.086652459  | 7.287301254 | 0.900803255  | 0.390178481 | 0.390178481 | -5.257458669 |
| 1458701_at         | -0.063478079 | 5.676982427 | -0.900782569 | 0.39018893  | 0.39018893  | -5.257475082 |
| 1426208_x_at       | -0.054467252 | 13.34896832 | -0.900725288 | 0.390217868 | 0.390217868 | -5.25752053  |
| 1455835_at         | 0.070221775  | 3.46821471  | 0.900714963  | 0.390223084 | 0.390223084 | -5.257528722 |
| 1430414_at         | 0.085076207  | 5.343031453 | 0.900714025  | 0.390223558 | 0.390223558 | -5.257529466 |
| 1459071_at         | -0.058769741 | 5.426904257 | -0.900710654 | 0.390225261 | 0.390225261 | -5.25753214  |
| 1437626_at         | 0.103483511  | 10.29151264 | 0.900619389  | 0.390271371 | 0.390271371 | -5.257604547 |
| 1437547_s_at       | -0.104642882 | 6.386047051 | -0.900600914 | 0.390280705 | 0.390280705 | -5.257619203 |
| 1438714_at         | -0.101285854 | 11.20254272 | -0.900594626 | 0.390283883 | 0.390283883 | -5.257624191 |
| 1419116_at         | -0.077540733 | 4.714792062 | -0.900547567 | 0.39030766  | 0.39030766  | -5.257661523 |
| 1454480_at         | -0.073667537 | 3.724352486 | -0.90047618  | 0.390343732 | 0.390343732 | -5.25771815  |
| 1420477_at         | 0.077432698  | 10.21761964 | 0.900441976  | 0.390361016 | 0.390361016 | -5.257745281 |
| 1459099_at         | 0.098243948  | 4.48014354  | 0.900420492  | 0.390371872 | 0.390371872 | -5.257762322 |
| 1450333_a_at       | 0.113776089  | 7.537813756 | 0.900387126  | 0.390388734 | 0.390388734 | -5.257788787 |
| 1458721_at         | -0.10539875  | 6.906370874 | -0.900362388 | 0.390401236 | 0.390401236 | -5.257808408 |
| 1453939_x_at       | 0.089985863  | 4.566741206 | 0.900357272  | 0.390403821 | 0.390403821 | -5.257812465 |
| 1417567_at         | -0.094128425 | 7.833149237 | -0.900338255 | 0.390413432 | 0.390413432 | -5.257827548 |
| 1437589_x_at       | -0.091772659 | 6.942353205 | -0.900317816 | 0.390423761 | 0.390423761 | -5.257843759 |

|                    |              |             |              |             |             |              |
|--------------------|--------------|-------------|--------------|-------------|-------------|--------------|
| 1426523_a_at       | 0.070585125  | 8.130213766 | 0.900292787  | 0.390436411 | 0.390436411 | -5.257863609 |
| 1417060_at         | 0.074467718  | 8.156103261 | 0.900284973  | 0.39044036  | 0.39044036  | -5.257869806 |
| 1432171_at         | 0.125395351  | 3.64376608  | 0.900084694  | 0.390541591 | 0.390541591 | -5.25802863  |
| 1440127_a_at       | -0.06857117  | 5.37630722  | -0.900030934 | 0.390568767 | 0.390568767 | -5.258071257 |
| 1442417_at         | -0.118148389 | 5.757995142 | -0.90002521  | 0.390571661 | 0.390571661 | -5.258075796 |
| 1419754_at         | -0.092774922 | 7.668314681 | -0.899669761 | 0.390751378 | 0.390751378 | -5.258357584 |
| 1450000_at         | 0.070313887  | 3.815911915 | 0.899619894  | 0.390776596 | 0.390776596 | -5.25839711  |
| 1427776_a_at       | 0.063628045  | 3.707978257 | 0.899534773  | 0.390819645 | 0.390819645 | -5.258464575 |
| 1441744_at         | -0.091861264 | 6.108403134 | -0.899478913 | 0.390847897 | 0.390847897 | -5.258508845 |
| 1421263_at         | 0.116980404  | 4.670615363 | 0.899430195  | 0.390872537 | 0.390872537 | -5.258547453 |
| 1429797_at         | -0.079372966 | 5.263792187 | -0.899407465 | 0.390884034 | 0.390884034 | -5.258565466 |
| 1419941_at         | -0.091277437 | 5.142137522 | -0.899405928 | 0.390884812 | 0.390884812 | -5.258566684 |
| 1443104_at         | -0.062375367 | 5.652619325 | -0.899349197 | 0.390913508 | 0.390913508 | -5.258611639 |
| 1440867_at         | -0.107772532 | 5.471307006 | -0.899337221 | 0.390919566 | 0.390919566 | -5.258621129 |
| 1420142_s_at       | 0.11714756   | 9.215952714 | 0.899127718  | 0.391025551 | 0.391025551 | -5.258787123 |
| 1422743_at         | -0.080538322 | 7.852268579 | -0.899079901 | 0.391049745 | 0.391049745 | -5.258825005 |
| 1442836_at         | -0.065572993 | 3.487327101 | -0.899006055 | 0.391087109 | 0.391087109 | -5.258883505 |
| 1425644_at         | -0.141169991 | 7.549163449 | -0.898960788 | 0.391110015 | 0.391110015 | -5.258919363 |
| 1422994_at         | -0.084202534 | 5.917049499 | -0.898939278 | 0.391120899 | 0.391120899 | -5.258936401 |
| 1454313_at         | -0.064574814 | 5.263836003 | -0.898919529 | 0.391130892 | 0.391130892 | -5.258952044 |
| 1435685_x_at       | 0.068909253  | 7.782127448 | 0.898881391  | 0.391150192 | 0.391150192 | -5.258982253 |
| 1437853_x_at       | -0.070809805 | 10.89362941 | -0.898872431 | 0.391154727 | 0.391154727 | -5.25898935  |
| 1416610_a_at       | 0.081170088  | 7.110613165 | 0.898865819  | 0.391158073 | 0.391158073 | -5.258994587 |
| 1439721_at         | -0.082365572 | 3.647977695 | -0.898849464 | 0.391166349 | 0.391166349 | -5.259007541 |
| 1451482_at         | -0.103311577 | 5.68547856  | -0.898746332 | 0.391218544 | 0.391218544 | -5.259089222 |
| 1422045_a_at       | 0.098464314  | 10.08153012 | 0.898727974  | 0.391227835 | 0.391227835 | -5.259103761 |
| 1438219_at         | -0.087036429 | 3.953721589 | -0.898594867 | 0.391295208 | 0.391295208 | -5.25920917  |
| 1443706_at         | -0.099650472 | 4.846894255 | -0.898564206 | 0.391310728 | 0.391310728 | -5.259233449 |
| 1417035_at         | 0.06347252   | 7.998293544 | 0.898545517  | 0.391320189 | 0.391320189 | -5.259248247 |
| 1418298_s_at       | -0.10556272  | 6.972480746 | -0.898431076 | 0.391378123 | 0.391378123 | -5.25933886  |
| 1428765_at         | 0.12290533   | 7.48380013  | 0.898409039  | 0.39138928  | 0.39138928  | -5.259356308 |
| 1442353_at         | -0.075747826 | 5.694483749 | -0.89834248  | 0.391422978 | 0.391422978 | -5.259409003 |
| 1429061_at         | -0.053107501 | 7.499362174 | -0.898313484 | 0.391437659 | 0.391437659 | -5.259431958 |
| 1432227_at         | 0.060288563  | 3.971274079 | 0.898307246  | 0.391440817 | 0.391440817 | -5.259436896 |
| 1460642_at         | -0.08114062  | 8.021625146 | -0.898251303 | 0.391469143 | 0.391469143 | -5.259481183 |
| 1432636_at         | -0.090555379 | 5.947414504 | -0.898150288 | 0.391520294 | 0.391520294 | -5.259561144 |
| 1433527_at         | 0.067911639  | 9.4030123   | 0.897993319  | 0.391599787 | 0.391599787 | -5.259685382 |
| 1422209_s_at       | -0.056142264 | 4.551826881 | -0.897975848 | 0.391608636 | 0.391608636 | -5.259699209 |
| 1431373_at         | -0.078868184 | 3.995667898 | -0.897895271 | 0.391649448 | 0.391649448 | -5.259762977 |
| 1429773_at         | -0.061748517 | 6.14567972  | -0.897878825 | 0.391657778 | 0.391657778 | -5.259775991 |
| AFFX-r2-Ec-bioB-M_ | 0.089159313  | 8.119354248 | 0.897825303  | 0.391684888 | 0.391684888 | -5.259818344 |
| 1450716_at         | 0.087938709  | 9.205321751 | 0.897824976  | 0.391685054 | 0.391685054 | -5.259818603 |
| 1443347_at         | -0.075295595 | 3.479289621 | -0.897804378 | 0.391695488 | 0.391695488 | -5.259834903 |
| 1459200_at         | -0.108044507 | 4.158313245 | -0.897803884 | 0.391695738 | 0.391695738 | -5.259835294 |
| 1421963_a_at       | -0.070086567 | 7.780378637 | -0.897626265 | 0.391785719 | 0.391785719 | -5.25997583  |
| 1449346_s_at       | -0.092804691 | 7.859575299 | -0.897619786 | 0.391789001 | 0.391789001 | -5.259980956 |
| 1420038_at         | -0.09832372  | 4.455218897 | -0.8976049   | 0.391796543 | 0.391796543 | -5.259992733 |
| 1452306_at         | -0.102045006 | 7.744081324 | -0.897598104 | 0.391799987 | 0.391799987 | -5.25999811  |
| 1418612_at         | 0.072872509  | 3.72509558  | 0.897585943  | 0.391806148 | 0.391806148 | -5.260007731 |
| 1438988_x_at       | 0.083775129  | 9.337074155 | 0.897370621  | 0.391915252 | 0.391915252 | -5.260178062 |
| 1447189_at         | -0.122677026 | 3.543864225 | -0.897251431 | 0.391975656 | 0.391975656 | -5.260272334 |
| 1458051_at         | -0.061157376 | 3.727981546 | -0.8972365   | 0.391983223 | 0.391983223 | -5.260284143 |
| 1449635_at         | 0.056670388  | 10.97437347 | 0.897192981  | 0.39200528  | 0.39200528  | -5.26031856  |

|              |              |             |              |             |             |              |
|--------------|--------------|-------------|--------------|-------------|-------------|--------------|
| 1447211_at   | -0.064926224 | 5.508203337 | -0.897171406 | 0.392016215 | 0.392016215 | -5.260335622 |
| 1424174_at   | 0.084343693  | 9.303679327 | 0.897140043  | 0.392032111 | 0.392032111 | -5.260360425 |
| 1433256_at   | -0.064879588 | 3.143352989 | -0.897137156 | 0.392033575 | 0.392033575 | -5.260362708 |
| 1450226_at   | -0.06063744  | 3.809011803 | -0.897077727 | 0.392063698 | 0.392063698 | -5.260409704 |
| 1458726_at   | -0.066580108 | 3.480587162 | -0.897063718 | 0.392070799 | 0.392070799 | -5.260420781 |
| 1448743_at   | -0.087184378 | 8.168639487 | -0.897042791 | 0.392081407 | 0.392081407 | -5.260437329 |
| 1451201_s_at | 0.065772077  | 10.17620527 | 0.896939548  | 0.392133744 | 0.392133744 | -5.260518964 |
| 1444407_at   | 0.068111443  | 4.092776521 | 0.896879905  | 0.392163981 | 0.392163981 | -5.26056612  |
| 1453443_at   | 0.066870678  | 3.11104742  | 0.896856972  | 0.392175607 | 0.392175607 | -5.260584251 |
| 1452592_at   | -0.097228065 | 5.965792709 | -0.896834497 | 0.392187002 | 0.392187002 | -5.26060202  |
| 1456573_x_at | -0.165926099 | 9.518913011 | -0.896792746 | 0.392208171 | 0.392208171 | -5.260635027 |
| 1421346_a_at | -0.067086128 | 9.117033289 | -0.896772657 | 0.392218356 | 0.392218356 | -5.260650909 |
| 1454536_at   | -0.088997273 | 3.527841232 | -0.896610151 | 0.392300758 | 0.392300758 | -5.260779367 |
| 1446168_at   | -0.060890392 | 3.743299561 | -0.896578696 | 0.392316709 | 0.392316709 | -5.260804229 |
| 1428674_at   | -0.062680662 | 9.718641214 | -0.896520451 | 0.392346247 | 0.392346247 | -5.260850265 |
| 1445506_at   | 0.091743107  | 3.290710747 | 0.896496272  | 0.39235851  | 0.39235851  | -5.260869375 |
| 1416152_a_at | 0.094163493  | 10.35412662 | 0.896486275  | 0.39236358  | 0.39236358  | -5.260877276 |
| 1448974_at   | 0.09150978   | 4.632260538 | 0.896474475  | 0.392369564 | 0.392369564 | -5.260886602 |
| 1429623_at   | 0.085511405  | 9.608160028 | 0.896457983  | 0.392377929 | 0.392377929 | -5.260899637 |
| 1415705_at   | 0.060732173  | 8.586593414 | 0.896436546  | 0.392388801 | 0.392388801 | -5.260916578 |
| 1423255_at   | 0.078825369  | 10.55861578 | 0.896409939  | 0.392402296 | 0.392402296 | -5.260937605 |
| 1460655_a_at | -0.07677549  | 8.702582005 | -0.896399305 | 0.39240769  | 0.39240769  | -5.260946009 |
| 1436175_at   | 0.067864441  | 8.349451052 | 0.896264355  | 0.392476141 | 0.392476141 | -5.26105265  |
| 1440847_at   | 0.087674606  | 6.585776439 | 0.896245541  | 0.392485685 | 0.392485685 | -5.261067516 |
| 1444687_at   | 0.090194441  | 4.703924617 | 0.896236059  | 0.392490495 | 0.392490495 | -5.261075008 |
| 1423344_at   | 0.085400406  | 7.179236238 | 0.896225426  | 0.392495889 | 0.392495889 | -5.26108341  |
| 1418372_at   | 0.059379305  | 8.791388279 | 0.896223938  | 0.392496644 | 0.392496644 | -5.261084586 |
| 1427566_at   | -0.071339249 | 4.801194338 | -0.896167245 | 0.392525404 | 0.392525404 | -5.261129381 |
| 1454106_a_at | 0.080572909  | 7.131399361 | 0.896110535  | 0.392554175 | 0.392554175 | -5.261174187 |
| 1459450_at   | -0.085141173 | 5.016968218 | -0.896096597 | 0.392561246 | 0.392561246 | -5.261185199 |
| 1458148_at   | -0.111420915 | 3.998795148 | -0.895996686 | 0.392611938 | 0.392611938 | -5.26126413  |
| 1429048_at   | 0.07619557   | 8.902117379 | 0.895955522  | 0.392632824 | 0.392632824 | -5.261296648 |
| 1453606_at   | 0.063524279  | 3.60026392  | 0.895947975  | 0.392636653 | 0.392636653 | -5.26130261  |
| 1457919_at   | 0.070573099  | 4.516249159 | 0.895866538  | 0.392677977 | 0.392677977 | -5.261366938 |
| 1435079_at   | -0.078434058 | 9.532747021 | -0.895832225 | 0.39269539  | 0.39269539  | -5.261394041 |
| 1419165_at   | 0.068558432  | 10.46448831 | 0.895810712  | 0.392706307 | 0.392706307 | -5.261411033 |
| 1422652_at   | 0.07917852   | 3.500260185 | 0.89576482   | 0.392729597 | 0.392729597 | -5.261447281 |
| 1418733_at   | -0.096011328 | 9.766539096 | -0.895728081 | 0.392748242 | 0.392748242 | -5.261476297 |
| 1420829_a_at | 0.064690084  | 11.52824742 | 0.8957249    | 0.392749857 | 0.392749857 | -5.261478809 |
| 1421227_at   | -0.070932694 | 3.117389623 | -0.895638207 | 0.392793856 | 0.392793856 | -5.261547275 |
| 1444215_at   | 0.114091888  | 4.703519517 | 0.895577617  | 0.39282461  | 0.39282461  | -5.261595123 |
| 1435573_at   | -0.084362996 | 7.371002725 | -0.895514553 | 0.392856621 | 0.392856621 | -5.261644922 |
| 1428378_at   | -0.061118454 | 5.604993975 | -0.895511537 | 0.392858152 | 0.392858152 | -5.261647304 |
| 1450202_at   | -0.059130369 | 3.812977202 | -0.895483602 | 0.392872333 | 0.392872333 | -5.261669361 |
| 1458333_x_at | -0.059314017 | 5.270327182 | -0.895463876 | 0.392882346 | 0.392882346 | -5.261684937 |
| 1422729_at   | 0.067617724  | 3.923663852 | 0.895451029  | 0.392888868 | 0.392888868 | -5.261695081 |
| 1427244_at   | -0.081886476 | 8.127961043 | -0.895404435 | 0.392912522 | 0.392912522 | -5.261731871 |
| 1432650_at   | -0.086843492 | 5.287008227 | -0.895261787 | 0.392984944 | 0.392984944 | -5.261844491 |
| 1429146_at   | 0.10680225   | 6.164445274 | 0.895249863  | 0.392990998 | 0.392990998 | -5.261853905 |
| 1442846_at   | 0.133431743  | 6.209140502 | 0.895152086  | 0.393040645 | 0.393040645 | -5.26193109  |
| 1459812_x_at | -0.058724906 | 3.193278392 | -0.895109133 | 0.393062456 | 0.393062456 | -5.261964995 |
| 1419306_at   | -0.206941975 | 4.885938165 | -0.895070012 | 0.393082322 | 0.393082322 | -5.261995874 |
| 1424737_at   | 0.059935975  | 3.938962496 | 0.894889643  | 0.393173925 | 0.393173925 | -5.26213823  |

|              |              |             |              |             |             |              |
|--------------|--------------|-------------|--------------|-------------|-------------|--------------|
| 1421547_at   | 0.104981859  | 4.338593688 | 0.894805411  | 0.393216709 | 0.393216709 | -5.262204702 |
| 1446352_at   | -0.08493483  | 6.170583711 | -0.894764529 | 0.393237475 | 0.393237475 | -5.262236962 |
| 1448300_at   | -0.08734394  | 8.402379922 | -0.894647535 | 0.393296907 | 0.393296907 | -5.262329276 |
| 1440857_at   | -0.110838221 | 4.872924088 | -0.894638978 | 0.393301253 | 0.393301253 | -5.262336027 |
| 1441373_at   | -0.108860629 | 5.790764593 | -0.894595895 | 0.393323141 | 0.393323141 | -5.262370019 |
| 1434201_at   | 0.132902036  | 7.170717908 | 0.894511441  | 0.393366048 | 0.393366048 | -5.262436647 |
| 1431123_s_at | 0.068629242  | 9.799904669 | 0.894489664  | 0.393377113 | 0.393377113 | -5.262453828 |
| 1431405_a_at | 0.097945678  | 8.191508573 | 0.894271257  | 0.393488094 | 0.393488094 | -5.262626109 |
| 1452413_at   | -0.096401789 | 4.905694406 | -0.89425589  | 0.393495904 | 0.393495904 | -5.262638229 |
| 1430790_at   | 0.073784108  | 4.008253574 | 0.894194931  | 0.393526884 | 0.393526884 | -5.262686308 |
| 1440255_at   | 0.0796234    | 6.989732929 | 0.894192316  | 0.393528213 | 0.393528213 | -5.26268837  |
| 1449710_s_at | 0.055837474  | 12.28754796 | 0.894188896  | 0.393529951 | 0.393529951 | -5.262691068 |
| 1447416_at   | 0.087972476  | 4.050841348 | 0.894132822  | 0.39355845  | 0.39355845  | -5.26273529  |
| 1447994_at   | -0.062874412 | 7.288437692 | -0.894059997 | 0.393595465 | 0.393595465 | -5.26279272  |
| 1429264_at   | 0.07697186   | 8.267491769 | 0.89399953   | 0.393626201 | 0.393626201 | -5.262840403 |
| 1450191_a_at | 0.09599345   | 6.77224388  | 0.893995614  | 0.393628191 | 0.393628191 | -5.26284349  |
| 1443144_at   | -0.078442373 | 3.659538212 | -0.893914644 | 0.393669351 | 0.393669351 | -5.262907335 |
| 1419532_at   | 0.134850095  | 5.234704685 | 0.893846896  | 0.393703793 | 0.393703793 | -5.262960751 |
| 1438182_x_at | 0.067853657  | 6.771524787 | 0.89383454   | 0.393710074 | 0.393710074 | -5.262970493 |
| 1457215_at   | 0.075794838  | 3.419510298 | 0.893817942  | 0.393718512 | 0.393718512 | -5.262983579 |
| 1443152_at   | -0.109995568 | 5.092429956 | -0.893790566 | 0.393732431 | 0.393732431 | -5.263005162 |
| 1456820_at   | 0.08457112   | 5.860175765 | 0.893686187  | 0.393785501 | 0.393785501 | -5.263087448 |
| 1430785_at   | -0.070461225 | 3.791174303 | -0.893673664 | 0.393791868 | 0.393791868 | -5.26309732  |
| 1459616_at   | -0.075320323 | 5.955912921 | -0.893612227 | 0.393823108 | 0.393823108 | -5.26314575  |
| 1453113_at   | 0.083544426  | 8.052871042 | 0.893538457  | 0.393860621 | 0.393860621 | -5.263203898 |
| 1438310_at   | -0.088723665 | 6.733143713 | -0.893507761 | 0.393876231 | 0.393876231 | -5.263228091 |
| 1449589_x_at | 0.080521135  | 4.046531806 | 0.893499048  | 0.393880662 | 0.393880662 | -5.263234959 |
| 1434393_at   | 0.064241401  | 9.451618265 | 0.893447666  | 0.393906793 | 0.393906793 | -5.263275456 |
| 1430717_at   | -0.065253688 | 3.838580834 | -0.89343014  | 0.393915706 | 0.393915706 | -5.263289268 |
| 1451945_at   | 0.06451408   | 3.275425242 | 0.893409442  | 0.393926233 | 0.393926233 | -5.263305581 |
| 1436677_at   | -0.123893433 | 7.082903003 | -0.89338597  | 0.39393817  | 0.39393817  | -5.263324079 |
| 1422371_at   | -0.078150778 | 3.746087246 | -0.893372369 | 0.393945088 | 0.393945088 | -5.263334798 |
| 1432293_at   | -0.07434464  | 4.980107386 | -0.893370913 | 0.393945829 | 0.393945829 | -5.263335945 |
| 1445403_at   | -0.068153562 | 4.226328048 | -0.893350022 | 0.393956454 | 0.393956454 | -5.263352409 |
| 1439179_a_at | 0.078817715  | 4.089564099 | 0.893341975  | 0.393960547 | 0.393960547 | -5.26335875  |
| 1456225_x_at | 0.065169767  | 4.326818946 | 0.893304827  | 0.393979441 | 0.393979441 | -5.263388024 |
| 1460428_at   | 0.079502026  | 9.768367804 | 0.893296149  | 0.393983856 | 0.393983856 | -5.263394863 |
| 1436430_at   | -0.087346252 | 4.941398232 | -0.893270394 | 0.393996956 | 0.393996956 | -5.263415158 |
| 1434832_at   | -0.08635432  | 8.338996571 | -0.893223568 | 0.394020775 | 0.394020775 | -5.263452057 |
| 1424847_at   | 0.063583946  | 3.948373956 | 0.893086275  | 0.394090616 | 0.394090616 | -5.263560233 |
| 1445901_at   | 0.11489111   | 3.864793075 | 0.893010882  | 0.394128973 | 0.394128973 | -5.263619631 |
| 1445232_at   | 0.070417102  | 4.080706147 | 0.892997615  | 0.394135723 | 0.394135723 | -5.263630083 |
| 1425639_at   | 0.088043333  | 4.621635791 | 0.892937207  | 0.394166458 | 0.394166458 | -5.263677671 |
| 1457704_at   | -0.118709931 | 5.347244598 | -0.892931443 | 0.394169391 | 0.394169391 | -5.263682212 |
| 1442048_at   | -0.05844564  | 4.333490785 | -0.892905462 | 0.394182611 | 0.394182611 | -5.263702679 |
| 1420110_s_at | 0.061247451  | 8.361813141 | 0.892817046  | 0.394227601 | 0.394227601 | -5.263772325 |
| 1447489_at   | -0.057020414 | 5.922627231 | -0.892781012 | 0.394245937 | 0.394245937 | -5.263800707 |
| 1435051_at   | -0.080288417 | 6.908909076 | -0.892768097 | 0.39425251  | 0.39425251  | -5.26381088  |
| 1440287_at   | -0.075460416 | 6.49096565  | -0.892714644 | 0.394279712 | 0.394279712 | -5.263852981 |
| 1418024_at   | 0.136530485  | 9.489430148 | 0.892553675  | 0.394361637 | 0.394361637 | -5.263979751 |
| 1458210_at   | -0.055165292 | 3.938488831 | -0.892520244 | 0.394378653 | 0.394378653 | -5.264006077 |
| 1459931_a_at | -0.061218006 | 4.999575174 | -0.892467944 | 0.394405275 | 0.394405275 | -5.26404726  |
| 1418912_at   | -0.087440827 | 6.565109601 | -0.892456897 | 0.394410898 | 0.394410898 | -5.264055959 |

|              |              |             |              |             |             |              |
|--------------|--------------|-------------|--------------|-------------|-------------|--------------|
| 1456028_x_at | 0.073739138  | 11.65518818 | 0.892341158  | 0.394469816 | 0.394469816 | -5.264147088 |
| 1419120_at   | 0.102931619  | 6.651005945 | 0.892265163  | 0.394508505 | 0.394508505 | -5.26420692  |
| 1434569_at   | 0.09917131   | 7.984845244 | 0.892261307  | 0.394510468 | 0.394510468 | -5.264209956 |
| 1435293_at   | -0.068734148 | 7.680533881 | -0.892230201 | 0.394526305 | 0.394526305 | -5.264234444 |
| 1430800_at   | 0.093197077  | 4.19041755  | 0.892219356  | 0.394531827 | 0.394531827 | -5.264242982 |
| 1417951_at   | -0.082153537 | 8.983573888 | -0.892081055 | 0.394602246 | 0.394602246 | -5.264351851 |
| 1446289_at   | 0.186115079  | 6.087274931 | 0.89201745   | 0.394634635 | 0.394634635 | -5.264401916 |
| 1418891_a_at | 0.091293677  | 6.48899359  | 0.891973392  | 0.394657071 | 0.394657071 | -5.264436593 |
| 1456577_x_at | 0.121929251  | 6.794019786 | 0.891937606  | 0.394675296 | 0.394675296 | -5.264464759 |
| 1446346_at   | -0.086946635 | 7.120557413 | -0.891935066 | 0.394676589 | 0.394676589 | -5.264466757 |
| 1442465_s_at | -0.092546468 | 8.129242224 | -0.891873519 | 0.394707935 | 0.394707935 | -5.264515196 |
| 1417744_a_at | 0.055806358  | 9.020583241 | 0.891783758  | 0.394753652 | 0.394753652 | -5.264585835 |
| 1441486_at   | -0.068217336 | 4.727135359 | -0.891703982 | 0.394794286 | 0.394794286 | -5.26464861  |
| 1438973_x_at | 0.089218124  | 5.099378014 | 0.891685014  | 0.394803949 | 0.394803949 | -5.264663535 |
| 1432998_at   | 0.064782088  | 6.037108319 | 0.89168299   | 0.394804979 | 0.394804979 | -5.264665127 |
| 1449785_at   | -0.080974121 | 3.467337813 | -0.891677758 | 0.394807645 | 0.394807645 | -5.264669244 |
| 1432639_at   | 0.081385767  | 3.328485745 | 0.891642631  | 0.394825538 | 0.394825538 | -5.264696884 |
| 1428517_at   | -0.083922677 | 9.245638405 | -0.89162892  | 0.394832523 | 0.394832523 | -5.264707672 |
| 1447639_x_at | -0.057379834 | 3.274141603 | -0.891612408 | 0.394840934 | 0.394840934 | -5.264720664 |
| 1451586_at   | -0.088999864 | 10.16337341 | -0.891598243 | 0.39484815  | 0.39484815  | -5.264731808 |
| 1436840_x_at | 0.061915688  | 13.22524376 | 0.891597283  | 0.39484864  | 0.39484864  | -5.264732564 |
| 1418446_at   | -0.114602906 | 8.046683231 | -0.891551244 | 0.394872094 | 0.394872094 | -5.264768786 |
| 1421268_at   | -0.068760451 | 7.588144373 | -0.891535635 | 0.394880046 | 0.394880046 | -5.264781066 |
| 1449000_at   | 0.064945589  | 9.27506457  | 0.891490991  | 0.394902791 | 0.394902791 | -5.26481619  |
| 1434224_at   | -0.065985665 | 8.612729473 | -0.891484197 | 0.394906252 | 0.394906252 | -5.264821534 |
| 1459779_s_at | 0.063079113  | 3.312981865 | 0.891447368  | 0.394925016 | 0.394925016 | -5.264850507 |
| 1458829_at   | 0.072241792  | 4.129249554 | 0.89133852   | 0.394980477 | 0.394980477 | -5.264936132 |
| 1427939_s_at | -0.065220302 | 8.149782885 | -0.891301563 | 0.394999308 | 0.394999308 | -5.264965202 |
| 1450142_a_at | 0.059133399  | 6.109360353 | 0.891284388  | 0.39500806  | 0.39500806  | -5.264978712 |
| 1442131_at   | -0.111720073 | 3.816380541 | -0.891189062 | 0.395056638 | 0.395056638 | -5.265053688 |
| 1442084_at   | -0.085431907 | 4.879110875 | -0.891177195 | 0.395062686 | 0.395062686 | -5.265063021 |
| 1417804_at   | 0.101428585  | 4.885721658 | 0.891120507  | 0.395091576 | 0.395091576 | -5.265107604 |
| 1426391_at   | -0.099583489 | 4.019740852 | -0.891107221 | 0.395098347 | 0.395098347 | -5.265118053 |
| 1452785_at   | -0.063404771 | 8.884886072 | -0.891066343 | 0.395119181 | 0.395119181 | -5.2651502   |
| 1442660_at   | 0.064984053  | 7.586412994 | 0.891047264  | 0.395128905 | 0.395128905 | -5.265165204 |
| 1427360_at   | -0.059948088 | 4.217156864 | -0.891023128 | 0.395141207 | 0.395141207 | -5.265184184 |
| 1418957_at   | 0.071793635  | 7.162924516 | 0.890984784  | 0.395160752 | 0.395160752 | -5.265214337 |
| 1435056_x_at | -0.081151563 | 9.241641309 | -0.890975702 | 0.395165381 | 0.395165381 | -5.265221478 |
| 1433724_at   | 0.065970557  | 9.005424841 | 0.890954336  | 0.395176272 | 0.395176272 | -5.265238279 |
| 1443370_at   | -0.058556745 | 3.087803946 | -0.890831436 | 0.39523892  | 0.39523892  | -5.265334912 |
| 1454331_at   | 0.128600996  | 4.003103606 | 0.890764322  | 0.395273135 | 0.395273135 | -5.265387678 |
| 1428905_at   | 0.086049321  | 9.684682996 | 0.89072622   | 0.395292561 | 0.395292561 | -5.265417633 |
| 1426640_s_at | -0.100756802 | 10.11900157 | -0.890647897 | 0.395332493 | 0.395332493 | -5.265479205 |
| 1453033_at   | -0.065076546 | 3.539232592 | -0.890628292 | 0.39534249  | 0.39534249  | -5.265494617 |
| 1457978_at   | -0.090838307 | 3.342238461 | -0.890626038 | 0.395343639 | 0.395343639 | -5.265496388 |
| 1427115_at   | -0.539314294 | 10.12067179 | -0.890515849 | 0.395399825 | 0.395399825 | -5.265583002 |
| 1444826_at   | -0.079731808 | 3.63949127  | -0.89049885  | 0.395408494 | 0.395408494 | -5.265596363 |
| 1457827_at   | -0.173192548 | 5.718495921 | -0.890483135 | 0.395416507 | 0.395416507 | -5.265608715 |
| 1420965_a_at | 0.06283547   | 9.646722348 | 0.890455947  | 0.395430372 | 0.395430372 | -5.265630084 |
| 1459477_at   | 0.101367626  | 5.616326874 | 0.890365002  | 0.395476752 | 0.395476752 | -5.26570156  |
| 1458364_s_at | -0.122980964 | 8.327451054 | -0.890354728 | 0.395481991 | 0.395481991 | -5.265709634 |
| 1434778_at   | 0.083856399  | 8.943840882 | 0.890337808  | 0.395490621 | 0.395490621 | -5.265722931 |
| 1425407_s_at | -0.073162369 | 5.356746717 | -0.890320474 | 0.395499461 | 0.395499461 | -5.265736554 |



|              |              |             |              |             |             |              |
|--------------|--------------|-------------|--------------|-------------|-------------|--------------|
| 1459434_at   | 0.107774962  | 6.081791372 | 0.890245406  | 0.395537749 | 0.395537749 | -5.265795545 |
| 1418888_a_at | -0.057508476 | 8.256276806 | -0.890154148 | 0.395584298 | 0.395584298 | -5.265867254 |
| 1416111_at   | -0.087121963 | 4.602492015 | -0.890137735 | 0.39559267  | 0.39559267  | -5.26588015  |
| 1442036_a_at | 0.067081163  | 5.299110388 | 0.890123783  | 0.395599787 | 0.395599787 | -5.265891112 |
| 1459796_at   | -0.075494102 | 3.560037538 | -0.890060996 | 0.395631816 | 0.395631816 | -5.265940444 |
| 1422816_a_at | -0.069810941 | 6.437768535 | -0.889977995 | 0.39567416  | 0.39567416  | -5.266005653 |
| 1421787_at   | 0.090780249  | 3.769641473 | 0.889941534  | 0.395692762 | 0.395692762 | -5.266034297 |
| 1456694_x_at | 0.067245407  | 7.085009064 | 0.889931241  | 0.395698014 | 0.395698014 | -5.266042383 |
| 1422021_at   | -0.07718079  | 4.651955517 | -0.889887493 | 0.395720334 | 0.395720334 | -5.266076749 |
| 1459466_at   | 0.093453523  | 3.843353349 | 0.889884865  | 0.395721675 | 0.395721675 | -5.266078814 |
| 1418490_at   | -0.080052614 | 5.609394624 | -0.889840294 | 0.395744417 | 0.395744417 | -5.266113826 |
| 1424894_at   | -0.071306221 | 8.865353646 | -0.889799348 | 0.39576531  | 0.39576531  | -5.266145989 |
| 1448951_at   | -0.079323299 | 5.784084633 | -0.889763573 | 0.395783565 | 0.395783565 | -5.266174089 |
| 1459167_at   | 0.077898653  | 6.544232896 | 0.889755604  | 0.395787631 | 0.395787631 | -5.266180349 |
| 1422999_at   | 0.079782528  | 6.549434524 | 0.889727096  | 0.395802178 | 0.395802178 | -5.26620274  |
| 1456752_at   | -0.068362056 | 9.212779636 | -0.889616365 | 0.395858687 | 0.395858687 | -5.266289707 |
| 1431879_at   | -0.077087282 | 3.932041768 | -0.889604104 | 0.395864944 | 0.395864944 | -5.266299336 |
| 1452030_a_at | 0.074228545  | 9.826275594 | 0.889566261  | 0.395884258 | 0.395884258 | -5.266329055 |
| 1431350_at   | -0.059688757 | 4.061347343 | -0.889539966 | 0.395897678 | 0.395897678 | -5.266349705 |
| 1426975_at   | -0.069467011 | 7.498830036 | -0.889529141 | 0.395903203 | 0.395903203 | -5.266358206 |
| 1451598_at   | -0.115506903 | 4.856928771 | -0.88947417  | 0.39593126  | 0.39593126  | -5.266401373 |
| 1421470_at   | -0.059512134 | 3.2624707   | -0.889454174 | 0.395941467 | 0.395941467 | -5.266417075 |
| 1459061_at   | -0.160509064 | 4.080544222 | -0.889450645 | 0.395943268 | 0.395943268 | -5.266419846 |
| 1454184_a_at | -0.088173466 | 5.818171771 | -0.889428084 | 0.395954784 | 0.395954784 | -5.266437561 |
| 1427575_at   | 0.072527208  | 3.627392579 | 0.889383079  | 0.395977756 | 0.395977756 | -5.266472899 |
| 1443150_at   | 0.067164716  | 3.991388515 | 0.88937872   | 0.395979981 | 0.395979981 | -5.266476321 |
| 1432135_s_at | 0.064823134  | 3.236394086 | 0.889368864  | 0.395985013 | 0.395985013 | -5.26648406  |
| 1433740_at   | -0.057114754 | 7.446330353 | -0.889325087 | 0.396007359 | 0.396007359 | -5.266518432 |
| 1425714_a_at | -0.073039442 | 4.130238572 | -0.889288821 | 0.396025873 | 0.396025873 | -5.266546905 |
| 1443538_at   | 0.095015641  | 3.479841321 | 0.889283669  | 0.396028503 | 0.396028503 | -5.26655095  |
| 1435648_at   | 0.098621615  | 3.680721449 | 0.889267931  | 0.396036538 | 0.396036538 | -5.266563306 |
| 1421522_at   | 0.09785096   | 4.499241212 | 0.889169928  | 0.396086571 | 0.396086571 | -5.266640245 |
| 1451480_at   | -0.083547639 | 6.99790975  | -0.889169291 | 0.396086896 | 0.396086896 | -5.266640745 |
| 1427716_at   | 0.075474352  | 6.422527072 | 0.889144488  | 0.39609956  | 0.39609956  | -5.266660216 |
| 1435199_at   | -0.075664782 | 3.587865035 | -0.88913522  | 0.396104292 | 0.396104292 | -5.266667491 |
| 1435411_at   | -0.071698614 | 6.094915315 | -0.889121473 | 0.396111311 | 0.396111311 | -5.266678283 |
| 1418426_at   | -0.077894794 | 3.772818185 | -0.889087923 | 0.39612844  | 0.39612844  | -5.266704618 |
| 1435997_at   | -0.112506594 | 5.981026434 | -0.889074533 | 0.396135277 | 0.396135277 | -5.266715129 |
| 1437983_at   | -0.094026915 | 4.595781498 | -0.889069857 | 0.396137665 | 0.396137665 | -5.266718799 |
| 1454430_at   | -0.061103047 | 3.571165944 | -0.889026301 | 0.396159905 | 0.396159905 | -5.266752988 |
| 1434254_at   | -0.077033152 | 9.115649138 | -0.889024594 | 0.396160777 | 0.396160777 | -5.266754328 |
| 1428469_a_at | -0.103712206 | 8.061724429 | -0.888996489 | 0.396175128 | 0.396175128 | -5.266776388 |
| 1435727_s_at | -0.090176911 | 8.96662103  | -0.888977423 | 0.396184864 | 0.396184864 | -5.266791353 |
| 1437354_at   | 0.058218793  | 8.134861547 | 0.888961987  | 0.396192746 | 0.396192746 | -5.266803468 |
| 1454110_at   | 0.060613713  | 3.174465757 | 0.888961793  | 0.396192845 | 0.396192845 | -5.26680362  |
| 1426431_at   | 0.094305184  | 7.138830081 | 0.888928644  | 0.396209773 | 0.396209773 | -5.266829638 |
| 1457561_at   | 0.072333673  | 5.047667838 | 0.888921299  | 0.396213524 | 0.396213524 | -5.266835403 |
| 1424355_a_at | -0.060215876 | 9.958458631 | -0.888880782 | 0.396234215 | 0.396234215 | -5.266867201 |
| 1416542_at   | 0.088925709  | 7.452352279 | 0.888832048  | 0.396259103 | 0.396259103 | -5.266905448 |
| 1440312_at   | 0.074175835  | 3.966326282 | 0.88882776   | 0.396261294 | 0.396261294 | -5.266908813 |
| 1431982_at   | -0.07881367  | 4.434761458 | -0.888821445 | 0.396264519 | 0.396264519 | -5.266913769 |
| 1457758_at   | -0.081847407 | 3.876920333 | -0.888791756 | 0.396279682 | 0.396279682 | -5.266937068 |
| 1433022_at   | 0.070507515  | 4.040591846 | 0.888789191  | 0.396280992 | 0.396280992 | -5.266939081 |

|              |              |             |              |             |             |              |
|--------------|--------------|-------------|--------------|-------------|-------------|--------------|
| 1460334_at   | 0.065236065  | 8.487726208 | 0.888761449  | 0.39629516  | 0.39629516  | -5.266960851 |
| 1422762_at   | -0.092628352 | 6.19328366  | -0.888708674 | 0.396322115 | 0.396322115 | -5.267002264 |
| 1432307_at   | -0.069437848 | 4.601154955 | -0.888644691 | 0.396354797 | 0.396354797 | -5.267052469 |
| 1433576_at   | -0.099294458 | 9.488031318 | -0.88864406  | 0.396355119 | 0.396355119 | -5.267052965 |
| 1441170_a_at | 0.154645368  | 6.839792676 | 0.888612479  | 0.396371251 | 0.396371251 | -5.267077744 |
| 1433513_x_at | -0.08324614  | 10.57159565 | -0.888485798 | 0.396435965 | 0.396435965 | -5.267177135 |
| 1455090_at   | -0.074155931 | 9.251768746 | -0.888332141 | 0.396514469 | 0.396514469 | -5.267297675 |
| 1434655_at   | -0.068596254 | 7.814761004 | -0.888310271 | 0.396525644 | 0.396525644 | -5.26731483  |
| 1418523_at   | -0.063598516 | 6.562620128 | -0.888296429 | 0.396532716 | 0.396532716 | -5.267325687 |
| 1418102_at   | 0.057210422  | 8.771557313 | 0.88827507   | 0.39654363  | 0.39654363  | -5.267342441 |
| 1430131_at   | 0.142381805  | 5.58033177  | 0.888150038  | 0.396607521 | 0.396607521 | -5.267440507 |
| 1456738_s_at | 0.073237121  | 9.342873926 | 0.888088268  | 0.396639088 | 0.396639088 | -5.267488951 |
| 1455557_at   | -0.055456879 | 3.3193387   | -0.888085466 | 0.39664052  | 0.39664052  | -5.267491148 |
| 1456660_a_at | 0.070227841  | 7.185963739 | 0.888080215  | 0.396643204 | 0.396643204 | -5.267495267 |
| 1418668_at   | -0.066122384 | 4.281216705 | -0.888050161 | 0.396658563 | 0.396658563 | -5.267518835 |
| 1452893_s_at | -0.122333488 | 6.816352909 | -0.887999145 | 0.396684637 | 0.396684637 | -5.267558842 |
| 1442042_at   | 0.063877288  | 4.659850331 | 0.887923278  | 0.396723413 | 0.396723413 | -5.267618333 |
| 1418690_at   | -0.09491295  | 3.728065432 | -0.88789213  | 0.396739334 | 0.396739334 | -5.267642756 |
| 1445235_at   | 0.085181999  | 5.929624878 | 0.887855924  | 0.396757841 | 0.396757841 | -5.267671145 |
| 1445234_at   | -0.055913139 | 3.636179843 | -0.887826524 | 0.39677287  | 0.39677287  | -5.267694196 |
| 1446779_at   | 0.076774126  | 5.961068855 | 0.88781438   | 0.396779078 | 0.396779078 | -5.267703718 |
| 1418407_at   | -0.109439514 | 5.346789431 | -0.88781245  | 0.396780064 | 0.396780064 | -5.267705231 |
| 1450144_at   | -0.061228226 | 5.693779564 | -0.887811679 | 0.396780458 | 0.396780458 | -5.267705835 |
| 1449612_x_at | -0.062811075 | 3.311931087 | -0.887786479 | 0.39679334  | 0.39679334  | -5.267725593 |
| 1423461_a_at | 0.063779664  | 8.800984275 | 0.88774091   | 0.396816635 | 0.396816635 | -5.267761319 |
| 1416899_at   | -0.061425029 | 6.369738534 | -0.887676342 | 0.396849644 | 0.396849644 | -5.267811938 |
| 1416029_at   | 0.072654724  | 7.953637249 | 0.887652435  | 0.396861867 | 0.396861867 | -5.26783068  |
| 1455755_at   | -0.071701445 | 4.751353573 | -0.887602268 | 0.396887516 | 0.396887516 | -5.267870006 |
| 1433136_at   | -0.095239474 | 4.161130559 | -0.887596759 | 0.396890332 | 0.396890332 | -5.267874324 |
| 1453895_at   | 0.057913246  | 3.227747958 | 0.887558131  | 0.396910083 | 0.396910083 | -5.267904604 |
| 1430525_at   | -0.078422738 | 5.509768078 | -0.887543039 | 0.396917799 | 0.396917799 | -5.267916433 |
| 1436171_at   | 0.116473478  | 6.359114306 | 0.887498551  | 0.396940547 | 0.396940547 | -5.267951304 |
| 1454699_at   | 0.090479192  | 8.392421607 | 0.88749828   | 0.396940685 | 0.396940685 | -5.267951516 |
| 1450587_at   | -0.079476205 | 5.749625184 | -0.887479738 | 0.396950166 | 0.396950166 | -5.267966049 |
| 1457578_at   | 0.105638831  | 4.170711493 | 0.887473847  | 0.396953179 | 0.396953179 | -5.267970667 |
| 1416116_at   | 0.103333954  | 6.733818433 | 0.88745117   | 0.396964774 | 0.396964774 | -5.267988441 |
| 1449115_at   | 0.058971547  | 8.052652773 | 0.8874375    | 0.396971765 | 0.396971765 | -5.267999155 |
| 1442921_at   | -0.076200826 | 4.071096848 | -0.887344058 | 0.397019549 | 0.397019549 | -5.268072389 |
| 1426656_at   | 0.054687207  | 8.32226208  | 0.887309861  | 0.397037037 | 0.397037037 | -5.268099188 |
| 1449112_at   | -0.08155972  | 4.062808135 | -0.887272316 | 0.397056239 | 0.397056239 | -5.268128611 |
| 1459294_at   | -0.104111912 | 3.917483697 | -0.887262498 | 0.39706126  | 0.39706126  | -5.268136304 |
| 1437174_at   | 0.056964375  | 7.902686823 | 0.88720432   | 0.397091015 | 0.397091015 | -5.268181894 |
| 1449976_a_at | 0.067556284  | 4.002158765 | 0.88718017   | 0.397103367 | 0.397103367 | -5.268200817 |
| 1419752_at   | -0.076424564 | 8.219152706 | -0.887169108 | 0.397109025 | 0.397109025 | -5.268209485 |
| 1427659_at   | -0.092004962 | 4.8410092   | -0.887163647 | 0.397111819 | 0.397111819 | -5.268213764 |
| 1434960_at   | 0.079130753  | 6.116868716 | 0.887117764  | 0.397135287 | 0.397135287 | -5.268249716 |
| 1457276_at   | 0.072205714  | 6.359686297 | 0.88709397   | 0.397147458 | 0.397147458 | -5.268268359 |
| 1429375_at   | 0.067057362  | 8.794291396 | 0.88700569   | 0.397192617 | 0.397192617 | -5.268337525 |
| 1415992_at   | 0.084083376  | 7.662886234 | 0.886866485  | 0.397263832 | 0.397263832 | -5.268446578 |
| 1450745_at   | -0.086576181 | 7.811498697 | -0.886852966 | 0.397270749 | 0.397270749 | -5.268457169 |
| 1439252_at   | 0.093945137  | 6.48195875  | 0.886803828  | 0.39729589  | 0.39729589  | -5.26849566  |
| 1424104_at   | 0.068845885  | 8.129439853 | 0.886803669  | 0.397295972 | 0.397295972 | -5.268495784 |
| 1424573_at   | 0.131570909  | 7.802884692 | 0.886715675  | 0.397340995 | 0.397340995 | -5.268564707 |

|              |              |             |              |             |             |              |
|--------------|--------------|-------------|--------------|-------------|-------------|--------------|
| 1419575_s_at | -0.070056016 | 8.31442026  | -0.886703967 | 0.397346986 | 0.397346986 | -5.268573877 |
| 1447999_x_at | -0.072419307 | 7.532647274 | -0.886661192 | 0.397368875 | 0.397368875 | -5.268607379 |
| 1441857_x_at | 0.069282611  | 3.124113865 | 0.88662921   | 0.39738524  | 0.39738524  | -5.268632427 |
| 1434252_at   | 0.087177708  | 5.809402099 | 0.88655422   | 0.397423617 | 0.397423617 | -5.268691156 |
| 1446254_at   | -0.069374303 | 4.720682205 | -0.886511818 | 0.397445317 | 0.397445317 | -5.268724361 |
| 1436110_at   | -0.069708183 | 4.437729166 | -0.886453123 | 0.397475357 | 0.397475357 | -5.268770323 |
| 1443516_at   | 0.076351961  | 8.140829139 | 0.886445689  | 0.397479162 | 0.397479162 | -5.268776144 |
| 1444986_at   | 0.070438962  | 3.473592664 | 0.886102263  | 0.39765496  | 0.39765496  | -5.269045018 |
| 1445891_at   | 0.072248525  | 5.232746916 | 0.885980392  | 0.397717359 | 0.397717359 | -5.269140413 |
| 1420370_s_at | -0.09238663  | 3.998869789 | -0.885962987 | 0.39772627  | 0.39772627  | -5.269154036 |
| 1418657_at   | -0.067897392 | 6.320660093 | -0.885962726 | 0.397726404 | 0.397726404 | -5.26915424  |
| 1422894_at   | 0.10747944   | 5.812017388 | 0.885776817  | 0.397821605 | 0.397821605 | -5.269299737 |
| 1459972_x_at | 0.075425689  | 5.875194342 | 0.885763103  | 0.397828628 | 0.397828628 | -5.269310469 |
| 1431824_at   | -0.079288509 | 3.54905592  | -0.885620074 | 0.397901883 | 0.397901883 | -5.269422388 |
| 1424135_at   | -0.077945128 | 8.350378483 | -0.885597652 | 0.397913367 | 0.397913367 | -5.269439932 |
| 1452088_at   | 0.263379927  | 5.783908213 | 0.885550642  | 0.397937447 | 0.397937447 | -5.269476713 |
| 1422618_x_at | 0.091738667  | 3.316040018 | 0.885518155  | 0.397954088 | 0.397954088 | -5.26950213  |
| 1459937_at   | -0.062225292 | 3.743970533 | -0.885516655 | 0.397954856 | 0.397954856 | -5.269503304 |
| 1447655_x_at | 0.087355351  | 8.338264408 | 0.88547883   | 0.397974233 | 0.397974233 | -5.269532896 |
| 1449865_at   | 0.065994593  | 8.115654878 | 0.885477252  | 0.397975041 | 0.397975041 | -5.269534131 |
| 1439108_at   | 0.102781252  | 9.73262134  | 0.88543378   | 0.397997311 | 0.397997311 | -5.26956814  |
| 1430609_at   | -0.085815658 | 4.566657927 | -0.885429722 | 0.397999389 | 0.397999389 | -5.269571314 |
| 1456913_at   | 0.086731569  | 6.20015273  | 0.885428154  | 0.398000193 | 0.398000193 | -5.269572541 |
| 1436729_at   | -0.065444001 | 9.232167735 | -0.885426996 | 0.398000786 | 0.398000786 | -5.269573447 |
| 1449343_s_at | -0.062716066 | 8.987872162 | -0.885286321 | 0.398072857 | 0.398072857 | -5.26968349  |
| 1449576_at   | 0.069149115  | 8.512853393 | 0.885285189  | 0.398073437 | 0.398073437 | -5.269684375 |
| 1438388_at   | 0.061703179  | 3.156839634 | 0.885283898  | 0.398074098 | 0.398074098 | -5.269685385 |
| 1433547_s_at | -0.069205155 | 8.544747462 | -0.885270624 | 0.398080899 | 0.398080899 | -5.269695768 |
| 1457498_at   | 0.06641019   | 5.771337652 | 0.885239942  | 0.39809662  | 0.39809662  | -5.269719767 |
| 1444238_at   | -0.077529577 | 3.908262749 | -0.885217091 | 0.398108328 | 0.398108328 | -5.26973764  |
| 1452562_at   | -0.122401428 | 4.064822025 | -0.885178849 | 0.398127923 | 0.398127923 | -5.26976755  |
| 1446956_at   | -0.066304496 | 4.239807606 | -0.885145364 | 0.398145081 | 0.398145081 | -5.269793738 |
| 1456895_at   | 0.06525466   | 3.56596937  | 0.88508298   | 0.398177048 | 0.398177048 | -5.269842527 |
| 1434596_at   | -0.062940737 | 4.360195077 | -0.885017005 | 0.398210858 | 0.398210858 | -5.269894122 |
| 1437357_at   | 0.118888316  | 7.117057924 | 0.884878786  | 0.398281697 | 0.398281697 | -5.270002202 |
| 1420593_a_at | -0.092093054 | 7.803698323 | -0.884847138 | 0.398297918 | 0.398297918 | -5.270026947 |
| 1439216_at   | 0.179230047  | 6.015139969 | 0.884793593  | 0.398325364 | 0.398325364 | -5.270068812 |
| 1457524_at   | -0.098308328 | 4.717355918 | -0.884789622 | 0.398327399 | 0.398327399 | -5.270071917 |
| 1458221_at   | -0.062254792 | 5.117368966 | -0.884777117 | 0.398333809 | 0.398333809 | -5.270081693 |
| 1439793_at   | -0.128498087 | 3.631625207 | -0.884630856 | 0.398408786 | 0.398408786 | -5.270196036 |
| 1428639_at   | 0.082586327  | 4.853679955 | 0.884612144  | 0.398418379 | 0.398418379 | -5.270210664 |
| 1458463_at   | -0.072376922 | 3.660489195 | -0.884526913 | 0.398462076 | 0.398462076 | -5.270277287 |
| 1441826_x_at | -0.078150914 | 5.833228959 | -0.884432704 | 0.398510379 | 0.398510379 | -5.270350922 |
| 1444310_at   | 0.173269395  | 5.176669593 | 0.884411836  | 0.398521079 | 0.398521079 | -5.270367231 |
| 1438087_at   | -0.070118222 | 6.651585552 | -0.884403457 | 0.398525375 | 0.398525375 | -5.27037378  |
| 1432555_at   | -0.087308668 | 7.221470323 | -0.884392686 | 0.398530898 | 0.398530898 | -5.270382198 |
| 1447801_x_at | -0.108731435 | 3.359902431 | -0.884386561 | 0.398534039 | 0.398534039 | -5.270386985 |
| 1434968_a_at | 0.0569086    | 11.13043708 | 0.884317931  | 0.398569231 | 0.398569231 | -5.27044062  |
| 1460357_at   | 0.071580893  | 9.574381375 | 0.884302881  | 0.398576949 | 0.398576949 | -5.270452382 |
| 1418749_at   | -0.067855814 | 8.174658057 | -0.884215318 | 0.398621854 | 0.398621854 | -5.270520808 |
| 1458604_at   | 0.066402554  | 5.054171295 | 0.884139197  | 0.398660894 | 0.398660894 | -5.270580288 |
| 1458141_at   | -0.089723578 | 6.209760728 | -0.884139155 | 0.398660916 | 0.398660916 | -5.270580321 |
| 1419434_at   | -0.115988664 | 6.822610953 | -0.884083803 | 0.398689305 | 0.398689305 | -5.270623569 |

|              |              |             |              |             |             |              |
|--------------|--------------|-------------|--------------|-------------|-------------|--------------|
| 1456277_at   | 0.094700974  | 5.9506805   | 0.884050968  | 0.398706147 | 0.398706147 | -5.270649224 |
| 1428421_a_at | -0.075007764 | 9.823855055 | -0.884042753 | 0.398710361 | 0.398710361 | -5.270655642 |
| 1430313_at   | -0.070985437 | 7.146037093 | -0.88401035  | 0.398726982 | 0.398726982 | -5.270680958 |
| 1455452_x_at | -0.158555398 | 6.562677079 | -0.883955144 | 0.3987553   | 0.3987553   | -5.270724087 |
| 1455156_at   | 0.082190798  | 7.351540135 | 0.883953291  | 0.39875625  | 0.39875625  | -5.270725535 |
| 1444700_at   | 0.068006735  | 3.632981895 | 0.883953016  | 0.398756391 | 0.398756391 | -5.27072575  |
| 1459287_at   | 0.057092348  | 3.965693418 | 0.883943816  | 0.398761111 | 0.398761111 | -5.270732937 |
| 1445806_at   | -0.067296361 | 4.010844474 | -0.883899522 | 0.398783833 | 0.398783833 | -5.270767539 |
| 1428699_at   | -0.058391778 | 5.190589614 | -0.883898173 | 0.398784525 | 0.398784525 | -5.270768594 |
| 1455673_at   | 0.064693044  | 6.490898184 | 0.883833003  | 0.398817958 | 0.398817958 | -5.270819502 |
| 1434901_at   | 0.057788059  | 7.789720373 | 0.883831439  | 0.39881876  | 0.39881876  | -5.270820723 |
| 1438821_at   | 0.155082476  | 5.614381551 | 0.883825465  | 0.398821825 | 0.398821825 | -5.27082539  |
| 1442713_at   | -0.095233538 | 3.568596006 | -0.88377275  | 0.39884887  | 0.39884887  | -5.270866566 |
| 1447315_at   | 0.080832664  | 4.86064456  | 0.883764774  | 0.398852962 | 0.398852962 | -5.270872796 |
| 1446117_at   | -0.078817363 | 6.821381253 | -0.88371151  | 0.398880291 | 0.398880291 | -5.2709144   |
| 1428241_at   | -0.057088963 | 7.697248565 | -0.883688055 | 0.398892325 | 0.398892325 | -5.270932718 |
| 1452205_x_at | 0.080192042  | 3.793744809 | 0.883665176  | 0.398904064 | 0.398904064 | -5.270950587 |
| 1453774_at   | 0.098622363  | 7.96174388  | 0.883563479  | 0.398956248 | 0.398956248 | -5.27103001  |
| 1421825_at   | -0.109891918 | 6.688224097 | -0.8835439   | 0.398966295 | 0.398966295 | -5.271045301 |
| 1453714_a_at | -0.070050058 | 3.660753721 | -0.8834548   | 0.39901202  | 0.39901202  | -5.271114879 |
| 1427747_a_at | 0.06108551   | 3.668041537 | 0.883423804  | 0.399027927 | 0.399027927 | -5.271139081 |
| 1442217_at   | -0.111306791 | 6.377598359 | -0.883397234 | 0.399041563 | 0.399041563 | -5.271159828 |
| 1437657_at   | 0.177954865  | 7.006660883 | 0.883314123  | 0.399084219 | 0.399084219 | -5.27122472  |
| 1453035_at   | -0.081615768 | 8.125931433 | -0.883256713 | 0.399113687 | 0.399113687 | -5.271269542 |
| 1449758_at   | -0.056360346 | 4.506664661 | -0.883237312 | 0.399123646 | 0.399123646 | -5.271284689 |
| 1441580_at   | -0.071892661 | 4.344236145 | -0.883150817 | 0.399168046 | 0.399168046 | -5.271352214 |
| 1416653_at   | 0.080199983  | 8.432897642 | 0.883122214  | 0.399182729 | 0.399182729 | -5.271374541 |
| 1454258_at   | -0.071011969 | 4.394316028 | -0.882975574 | 0.399258012 | 0.399258012 | -5.271489004 |
| 1450037_at   | 0.139226056  | 5.627132705 | 0.882961492  | 0.399265242 | 0.399265242 | -5.271499995 |
| 1418738_at   | -0.058549256 | 8.2439481   | -0.882951811 | 0.399270213 | 0.399270213 | -5.271507551 |
| 1433895_at   | 0.081735302  | 8.001564448 | 0.882949965  | 0.399271161 | 0.399271161 | -5.271508992 |
| 1448508_at   | 0.063754825  | 7.116547422 | 0.882904467  | 0.399294521 | 0.399294521 | -5.271544501 |
| 1451950_a_at | 0.081148002  | 4.286215795 | 0.882895399  | 0.399299177 | 0.399299177 | -5.271551578 |
| 1443486_at   | -0.107650719 | 6.464050434 | -0.882887497 | 0.399303234 | 0.399303234 | -5.271557746 |
| 1449296_a_at | -0.076065365 | 7.256233931 | -0.882864665 | 0.399314958 | 0.399314958 | -5.271575565 |
| 1443977_at   | -0.253120167 | 8.190669928 | -0.882817064 | 0.399339401 | 0.399339401 | -5.271612714 |
| 1428287_at   | 0.057472924  | 8.161298415 | 0.882802898  | 0.399346675 | 0.399346675 | -5.271623768 |
| 1434763_at   | -0.092704867 | 6.713923641 | -0.882733223 | 0.399382454 | 0.399382454 | -5.27167814  |
| 1447775_x_at | 0.096564821  | 6.04484515  | 0.882715406  | 0.399391604 | 0.399391604 | -5.271692043 |
| 1456838_at   | -0.118468108 | 4.818648851 | -0.882675388 | 0.399412156 | 0.399412156 | -5.27172327  |
| 1460675_at   | -0.090160549 | 8.163939107 | -0.882625625 | 0.399437712 | 0.399437712 | -5.271762098 |
| 1445337_at   | 0.056265165  | 8.185447932 | 0.882604303  | 0.399448663 | 0.399448663 | -5.271778734 |
| 1428020_at   | 0.085484851  | 5.319096344 | 0.88259938   | 0.399451192 | 0.399451192 | -5.271782576 |
| 1425946_at   | -0.074423678 | 5.729906926 | -0.882597592 | 0.39945211  | 0.39945211  | -5.271783971 |
| 1445890_at   | -0.062245389 | 4.008710893 | -0.882563105 | 0.399469823 | 0.399469823 | -5.271810879 |
| 1429361_at   | 0.075812831  | 4.074221898 | 0.882495463  | 0.399504566 | 0.399504566 | -5.271863651 |
| 1454186_a_at | -0.060118616 | 6.296132746 | -0.882469294 | 0.399518007 | 0.399518007 | -5.271884067 |
| 1446341_at   | 0.07499128   | 4.623701477 | 0.882452806  | 0.399526477 | 0.399526477 | -5.271896931 |
| 1454546_at   | 0.059804102  | 4.502908948 | 0.882443801  | 0.399531103 | 0.399531103 | -5.271903956 |
| 1437973_at   | -0.064103559 | 4.475177111 | -0.882374451 | 0.399566726 | 0.399566726 | -5.271958055 |
| 1429508_at   | 0.063836346  | 8.291545164 | 0.882341835  | 0.399583481 | 0.399583481 | -5.271983497 |
| 1442685_at   | -0.061996787 | 3.840134542 | -0.882213447 | 0.399649441 | 0.399649441 | -5.272083641 |
| 1430383_at   | 0.06765951   | 3.730292663 | 0.882198971  | 0.399656878 | 0.399656878 | -5.272094931 |

|              |              |             |              |             |             |              |
|--------------|--------------|-------------|--------------|-------------|-------------|--------------|
| 1440493_at   | -0.08905981  | 3.735672143 | -0.882189892 | 0.399661543 | 0.399661543 | -5.272102012 |
| 1443931_at   | 0.0770808    | 4.950367442 | 0.882153787  | 0.399680094 | 0.399680094 | -5.272130172 |
| 1422385_at   | 0.069580169  | 4.388119665 | 0.882101437  | 0.399706991 | 0.399706991 | -5.272170998 |
| 1445366_at   | 0.072402764  | 3.255422496 | 0.882091239  | 0.399712232 | 0.399712232 | -5.272178952 |
| 1436939_at   | -0.281067481 | 6.200788076 | -0.882052713 | 0.399732028 | 0.399732028 | -5.272208996 |
| 1433450_at   | -0.106717579 | 5.022857645 | -0.88203721  | 0.399739994 | 0.399739994 | -5.272221086 |
| 1433815_at   | 0.053088437  | 3.472787575 | 0.882008905  | 0.399754539 | 0.399754539 | -5.272243159 |
| 1451514_at   | 0.076985845  | 3.827615758 | 0.881979486  | 0.399769657 | 0.399769657 | -5.272266099 |
| 1422349_at   | -0.060749221 | 4.193562684 | -0.881881682 | 0.399819919 | 0.399819919 | -5.272342362 |
| 1444874_at   | 0.085454632  | 4.704556667 | 0.881874555  | 0.399823582 | 0.399823582 | -5.272347919 |
| 1456697_x_at | -0.060737665 | 4.12117354  | -0.881873538 | 0.399824105 | 0.399824105 | -5.272348712 |
| 1416622_at   | 0.057866728  | 7.521980792 | 0.881843327  | 0.399839631 | 0.399839631 | -5.272372267 |
| 1451845_a_at | 0.058379563  | 9.555730135 | 0.881835828  | 0.399843485 | 0.399843485 | -5.272378114 |
| 1419758_at   | 0.095630914  | 3.314494877 | 0.881763278  | 0.399880774 | 0.399880774 | -5.272434678 |
| 1420330_at   | 0.067086817  | 3.514105873 | 0.8817548    | 0.399885131 | 0.399885131 | -5.272441288 |
| 1434554_at   | -0.06556326  | 7.554652824 | -0.881722286 | 0.399901844 | 0.399901844 | -5.272466636 |
| 1455970_at   | 0.147360251  | 7.158719562 | 0.881713374  | 0.399906424 | 0.399906424 | -5.272473584 |
| 1456018_at   | 0.060334726  | 9.225289713 | 0.881710247  | 0.399908031 | 0.399908031 | -5.272476021 |
| 1459447_at   | 0.065156241  | 3.942119164 | 0.881560793  | 0.399984857 | 0.399984857 | -5.272592525 |
| 1427768_s_at | -0.115296873 | 4.652808495 | -0.881553844 | 0.39998843  | 0.39998843  | -5.272597942 |
| 1451853_at   | -0.061815948 | 5.685210807 | -0.881500211 | 0.400016002 | 0.400016002 | -5.272639746 |
| 1456709_at   | -0.054526987 | 3.487391201 | -0.881499932 | 0.400016146 | 0.400016146 | -5.272639964 |
| 1439697_at   | -0.120651309 | 3.598939377 | -0.88147259  | 0.400030202 | 0.400030202 | -5.272661275 |
| 1459584_at   | -0.103519567 | 3.567417818 | -0.881448636 | 0.400042518 | 0.400042518 | -5.272679945 |
| 1443894_at   | -0.17418707  | 6.048266649 | -0.881423765 | 0.400055305 | 0.400055305 | -5.272699329 |
| 1452424_at   | 0.073194109  | 7.530996215 | 0.881383369  | 0.400076075 | 0.400076075 | -5.272730812 |
| 1440016_at   | 0.086180233  | 4.754257663 | 0.881332991  | 0.400101978 | 0.400101978 | -5.272770073 |
| 1459334_at   | 0.085820569  | 3.904536714 | 0.8812621    | 0.40013843  | 0.40013843  | -5.272825317 |
| 1451813_at   | 0.068158832  | 4.853054496 | 0.881229403  | 0.400155244 | 0.400155244 | -5.272850797 |
| 1428146_s_at | 0.067181186  | 9.298560056 | 0.881060099  | 0.400242312 | 0.400242312 | -5.272982714 |
| 1442719_at   | 0.061513281  | 4.768571204 | 0.881017819  | 0.400264058 | 0.400264058 | -5.273015654 |
| 1420676_at   | -0.067087335 | 3.121928464 | -0.881007196 | 0.400269521 | 0.400269521 | -5.27302393  |
| 1452849_at   | -0.065951053 | 7.644908138 | -0.880936598 | 0.400305833 | 0.400305833 | -5.273078929 |
| 1454991_at   | -0.070670743 | 9.142772727 | -0.880794534 | 0.400378911 | 0.400378911 | -5.273189592 |
| 1451502_at   | -0.074014251 | 5.412803769 | -0.880752409 | 0.400400582 | 0.400400582 | -5.273222404 |
| 1460109_at   | -0.090903501 | 5.689847057 | -0.880672685 | 0.400441598 | 0.400441598 | -5.273284498 |
| 1423020_at   | -0.081267356 | 4.125651479 | -0.880667904 | 0.400444057 | 0.400444057 | -5.273288221 |
| 1452661_at   | 0.076189033  | 9.25726969  | 0.880654763  | 0.400450818 | 0.400450818 | -5.273298456 |
| 1452356_at   | -0.06985547  | 6.841344093 | -0.880638055 | 0.400459415 | 0.400459415 | -5.273311468 |
| 1449776_at   | -0.068532636 | 4.974054681 | -0.880611548 | 0.400473053 | 0.400473053 | -5.273332112 |
| 1440273_at   | 0.118521669  | 6.342234826 | 0.8805805    | 0.400489028 | 0.400489028 | -5.273356291 |
| 1455668_at   | 0.056055208  | 8.845377735 | 0.880551096  | 0.400504158 | 0.400504158 | -5.27337919  |
| 1446563_at   | -0.168577705 | 3.809666647 | -0.880550789 | 0.400504316 | 0.400504316 | -5.273379429 |
| 1415779_s_at | 0.054224022  | 13.43568232 | 0.880480621  | 0.400540421 | 0.400540421 | -5.273434069 |
| 1415749_a_at | 0.059211739  | 10.02598137 | 0.880462133  | 0.400549935 | 0.400549935 | -5.273448466 |
| 1453424_at   | 0.105288761  | 6.179563336 | 0.88040803   | 0.400577776 | 0.400577776 | -5.273490593 |
| 1445716_at   | -0.072689867 | 4.078949833 | -0.88034419  | 0.40061063  | 0.40061063  | -5.2735403   |
| 1447770_at   | -0.097261492 | 3.84526368  | -0.880285483 | 0.400640844 | 0.400640844 | -5.273586007 |
| 1440617_at   | 0.104677922  | 3.79329786  | 0.880266973  | 0.400650371 | 0.400650371 | -5.273600418 |
| 1415854_at   | -0.070775886 | 3.847816759 | -0.880235503 | 0.400666568 | 0.400666568 | -5.273624918 |
| 1444478_at   | 0.060585359  | 7.072123617 | 0.880212164  | 0.400678581 | 0.400678581 | -5.273643087 |
| 1427629_at   | 0.072615812  | 3.464775685 | 0.880199084  | 0.400685313 | 0.400685313 | -5.27365327  |
| 1442886_at   | 0.097275322  | 9.33434283  | 0.880176967  | 0.400696697 | 0.400696697 | -5.273670487 |

|                    |              |             |              |             |             |              |
|--------------------|--------------|-------------|--------------|-------------|-------------|--------------|
| 1450528_at         | -0.065188566 | 3.818312499 | -0.880167417 | 0.400701612 | 0.400701612 | -5.273677921 |
| 1426786_s_at       | -0.072423066 | 7.868565006 | -0.880151577 | 0.400709766 | 0.400709766 | -5.273690252 |
| 1430234_at         | 0.086283634  | 3.329806058 | 0.88014414   | 0.400713594 | 0.400713594 | -5.273696042 |
| 1421788_x_at       | -0.065552947 | 4.33324532  | -0.880116387 | 0.400727879 | 0.400727879 | -5.273717646 |
| 1438460_at         | 0.109492909  | 7.539254934 | 0.880086154  | 0.400743442 | 0.400743442 | -5.273741179 |
| AFFX-PheX-3_at     | 0.070551617  | 6.291752709 | 0.880081571  | 0.400745801 | 0.400745801 | -5.273744746 |
| 1434396_a_at       | 0.054168184  | 12.3668389  | 0.879919668  | 0.400829149 | 0.400829149 | -5.273870761 |
| 1457714_at         | -0.064683278 | 4.062400643 | -0.879903286 | 0.400837583 | 0.400837583 | -5.273883511 |
| 1421197_a_at       | -0.075094671 | 9.108023371 | -0.879848262 | 0.400865913 | 0.400865913 | -5.273926333 |
| 1445204_at         | 0.099457399  | 5.120683444 | 0.879831358  | 0.400874616 | 0.400874616 | -5.273939488 |
| AFFX-r2-Ec-bioD-5_ | 0.087090103  | 11.67649003 | 0.87981287   | 0.400884135 | 0.400884135 | -5.273953876 |
| 1455181_at         | 0.070458778  | 8.987740355 | 0.879810634  | 0.400885286 | 0.400885286 | -5.273955615 |
| 1425897_at         | -0.056885036 | 3.315387311 | -0.879802582 | 0.400889432 | 0.400889432 | -5.273961882 |
| 1433761_at         | 0.094930346  | 8.077282236 | 0.879802419  | 0.400889517 | 0.400889517 | -5.273962009 |
| 1435364_at         | 0.069349984  | 8.119231747 | 0.87975872   | 0.400912017 | 0.400912017 | -5.273996014 |
| 1417340_at         | 0.077249363  | 8.697914547 | 0.879731136  | 0.400926221 | 0.400926221 | -5.274017479 |
| 1422562_at         | -0.17684952  | 5.658063991 | -0.879703884 | 0.400940253 | 0.400940253 | -5.274038684 |
| 1443893_at         | -0.614307614 | 4.928261087 | -0.879640297 | 0.400972998 | 0.400972998 | -5.274088161 |
| 1420788_at         | -0.09769697  | 5.000831536 | -0.879559402 | 0.401014658 | 0.401014658 | -5.2741511   |
| 1426886_at         | 0.125764705  | 8.139695658 | 0.879523071  | 0.401033369 | 0.401033369 | -5.274179366 |
| 1435114_at         | 0.06561471   | 8.689974901 | 0.879387166  | 0.401103367 | 0.401103367 | -5.274285092 |
| 1429977_at         | 0.078442296  | 8.630332709 | 0.879266886  | 0.401165325 | 0.401165325 | -5.274378651 |
| 1428230_at         | -0.056803341 | 10.38834363 | -0.879188859 | 0.401205521 | 0.401205521 | -5.274439338 |
| 1449943_at         | 0.110836639  | 4.213946519 | 0.879135105  | 0.401233215 | 0.401233215 | -5.274481144 |
| 1440017_at         | 0.08840652   | 3.743115798 | 0.879132224  | 0.401234699 | 0.401234699 | -5.274483384 |
| 1455050_at         | -0.092995999 | 7.815286357 | -0.87911266  | 0.401244779 | 0.401244779 | -5.274498599 |
| 1422076_at         | -0.121761362 | 4.145581499 | -0.878945646 | 0.401330833 | 0.401330833 | -5.274628473 |
| 1427273_at         | 0.059660906  | 7.573183266 | 0.878912193  | 0.401348071 | 0.401348071 | -5.274654485 |
| 1459072_at         | 0.270612556  | 4.876374829 | 0.878812221  | 0.40139959  | 0.40139959  | -5.274732214 |
| 1444447_at         | 0.099400499  | 5.678063676 | 0.878766366  | 0.401423222 | 0.401423222 | -5.274767864 |
| 1448763_at         | 0.065887448  | 8.688170299 | 0.878757189  | 0.401427951 | 0.401427951 | -5.274774998 |
| 1437317_at         | -0.060480803 | 6.899382674 | -0.878746705 | 0.401433354 | 0.401433354 | -5.274783149 |
| 1442181_at         | -0.067793874 | 7.67222965  | -0.878733144 | 0.401440343 | 0.401440343 | -5.274793691 |
| 1451357_at         | -0.107627946 | 9.93822642  | -0.878706693 | 0.401453976 | 0.401453976 | -5.274814254 |
| 1442497_at         | 0.191776226  | 6.154743351 | 0.878578867  | 0.401519861 | 0.401519861 | -5.274913618 |
| 1430922_at         | -0.077697874 | 3.66885029  | -0.878525634 | 0.401547302 | 0.401547302 | -5.274954996 |
| 1455534_s_at       | 0.070582218  | 8.824274724 | 0.878475093  | 0.401573355 | 0.401573355 | -5.274994278 |
| 1440913_at         | -0.111722551 | 5.772471138 | -0.87835052  | 0.401637577 | 0.401637577 | -5.275091092 |
| 1447064_at         | 0.104606079  | 6.783011972 | 0.878290881  | 0.401668326 | 0.401668326 | -5.275137438 |
| 1421379_at         | -0.080519226 | 5.520465763 | -0.878163081 | 0.401734222 | 0.401734222 | -5.275236744 |
| 1456103_at         | -0.088017394 | 6.310669781 | -0.878011589 | 0.401812345 | 0.401812345 | -5.275354444 |
| 1421922_at         | 0.063007423  | 7.846058251 | 0.878000031  | 0.401818305 | 0.401818305 | -5.275363422 |
| 1447924_at         | -0.070492532 | 7.471979011 | -0.877999145 | 0.401818763 | 0.401818763 | -5.275364111 |
| 1444332_at         | -0.093721255 | 3.605729392 | -0.877991588 | 0.40182266  | 0.40182266  | -5.275369981 |
| 1432407_at         | -0.088936019 | 3.818251791 | -0.877935946 | 0.401851357 | 0.401851357 | -5.275413207 |
| 1453520_at         | -0.092484031 | 5.463595381 | -0.877911555 | 0.401863937 | 0.401863937 | -5.275432154 |
| 1435398_at         | -0.065783    | 7.712234757 | -0.877895449 | 0.401872244 | 0.401872244 | -5.275444666 |
| 1454398_at         | 0.068934013  | 4.821468573 | 0.87786639   | 0.401887232 | 0.401887232 | -5.275467238 |
| 1435795_at         | 0.053622094  | 5.091615946 | 0.87785508   | 0.401893066 | 0.401893066 | -5.275476024 |
| 1424796_at         | -0.075655382 | 5.258276808 | -0.877660805 | 0.40199328  | 0.40199328  | -5.275626916 |
| 1437285_at         | -0.119953021 | 4.04833698  | -0.877606367 | 0.402021365 | 0.402021365 | -5.275669193 |
| 1446370_at         | -0.071373409 | 3.64174646  | -0.877542559 | 0.402054285 | 0.402054285 | -5.275718743 |
| 1418655_at         | 0.060217782  | 5.34972091  | 0.877524344  | 0.402063683 | 0.402063683 | -5.275732887 |

|              |              |             |              |             |             |              |
|--------------|--------------|-------------|--------------|-------------|-------------|--------------|
| 1434984_at   | -0.064654911 | 5.560675527 | -0.877506844 | 0.402072712 | 0.402072712 | -5.275746477 |
| 1439268_x_at | 0.079705661  | 11.7720294  | 0.877458248  | 0.402097786 | 0.402097786 | -5.275784211 |
| 1445631_at   | 0.057003449  | 4.11109708  | 0.8774119    | 0.402121701 | 0.402121701 | -5.275820198 |
| 1457093_at   | -0.061304293 | 7.184978699 | -0.877405445 | 0.402125032 | 0.402125032 | -5.27582521  |
| 1436863_at   | -0.08717286  | 4.586516436 | -0.877395107 | 0.402130366 | 0.402130366 | -5.275833237 |
| 1443904_at   | 0.067404065  | 3.655064254 | 0.877351557  | 0.402152839 | 0.402152839 | -5.27586705  |
| 1460101_at   | 0.077994688  | 4.442017953 | 0.877289674  | 0.402184773 | 0.402184773 | -5.275915094 |
| 1444529_at   | -0.069332326 | 3.190251339 | -0.87725971  | 0.402200237 | 0.402200237 | -5.275938357 |
| 1450384_at   | -0.066876013 | 8.191232794 | -0.877138636 | 0.402262723 | 0.402262723 | -5.276032344 |
| 1445211_at   | -0.075273493 | 7.733426146 | -0.877117339 | 0.402273715 | 0.402273715 | -5.276048876 |
| 1438737_at   | -0.069908988 | 3.166300124 | -0.876997564 | 0.402335538 | 0.402335538 | -5.276141842 |
| 1459613_at   | -0.063323003 | 3.267086405 | -0.876947043 | 0.402361617 | 0.402361617 | -5.276181053 |
| 1416177_at   | 0.069063156  | 10.71251553 | 0.876933166  | 0.402368781 | 0.402368781 | -5.276191823 |
| 1447193_at   | -0.067886246 | 3.187088909 | -0.87693129  | 0.402369749 | 0.402369749 | -5.276193279 |
| 1448295_at   | 0.065876772  | 9.39449494  | 0.876851801  | 0.402410785 | 0.402410785 | -5.276254967 |
| 1444628_at   | -0.136225108 | 6.890143184 | -0.876827562 | 0.402423299 | 0.402423299 | -5.276273777 |
| 1420998_at   | 0.108864125  | 6.150351728 | 0.876766256  | 0.40245495  | 0.40245495  | -5.27632135  |
| 1436468_at   | 0.07005692   | 5.969072758 | 0.876766133  | 0.402455014 | 0.402455014 | -5.276321446 |
| 1442148_at   | 0.172292633  | 8.737366065 | 0.876750914  | 0.402462871 | 0.402462871 | -5.276333255 |
| 1449958_a_at | 0.10650511   | 3.862804136 | 0.876641128  | 0.402519557 | 0.402519557 | -5.276418439 |
| 1458162_at   | -0.08275527  | 7.01556531  | -0.876592041 | 0.402544904 | 0.402544904 | -5.276456524 |
| 1417486_at   | 0.072473144  | 6.591422425 | 0.876410629  | 0.402638589 | 0.402638589 | -5.276597258 |
| 1439895_at   | -0.071312599 | 8.124702169 | -0.876400198 | 0.402643976 | 0.402643976 | -5.27660535  |
| 1456809_at   | -0.095675035 | 4.239049893 | -0.876308677 | 0.402691246 | 0.402691246 | -5.276676339 |
| 1450533_a_at | -0.11986741  | 9.330821968 | -0.876305943 | 0.402692658 | 0.402692658 | -5.27667846  |
| 1443009_at   | -0.06492254  | 5.728763945 | -0.876223426 | 0.402735281 | 0.402735281 | -5.27674246  |
| 1428590_at   | -0.075038875 | 4.551664205 | -0.876194386 | 0.402750282 | 0.402750282 | -5.276764983 |
| 1445984_at   | -0.292848594 | 6.982610605 | -0.87619281  | 0.402751096 | 0.402751096 | -5.276766205 |
| 1427381_at   | -0.069538796 | 4.28033363  | -0.876182272 | 0.402756539 | 0.402756539 | -5.276774377 |
| 1449237_at   | -0.07225854  | 6.373930738 | -0.876158219 | 0.402768964 | 0.402768964 | -5.276793031 |
| 1453528_at   | 0.083822011  | 5.979305842 | 0.876119318  | 0.40278906  | 0.40278906  | -5.276823199 |
| 1438210_at   | 0.062229589  | 3.382346559 | 0.876047648  | 0.402826086 | 0.402826086 | -5.276878777 |
| 1428333_at   | -0.094500612 | 8.720710779 | -0.876043078 | 0.402828447 | 0.402828447 | -5.27688232  |
| 1416639_at   | -0.074755865 | 5.504045873 | -0.875899731 | 0.40290251  | 0.40290251  | -5.27699347  |
| 1432073_at   | -0.101950253 | 7.260368152 | -0.875762866 | 0.402973232 | 0.402973232 | -5.277099578 |
| 1448832_a_at | 0.112404335  | 7.375195075 | 0.875745583  | 0.402982164 | 0.402982164 | -5.277112977 |
| 1429671_at   | 0.063179004  | 7.356782017 | 0.875706704  | 0.403002255 | 0.403002255 | -5.277143116 |
| 1458698_at   | -0.071705299 | 4.044856281 | -0.875641464 | 0.403035972 | 0.403035972 | -5.277193688 |
| 1457250_x_at | 0.060263946  | 3.49880933  | 0.875564856  | 0.403075566 | 0.403075566 | -5.277253068 |
| 1434132_at   | 0.053672791  | 10.2940395  | 0.875557856  | 0.403079184 | 0.403079184 | -5.277258494 |
| 1447135_at   | -0.101377884 | 4.640128435 | -0.875505758 | 0.403106111 | 0.403106111 | -5.277298873 |
| 1437381_x_at | -0.074811843 | 6.30552401  | -0.8754447   | 0.403137672 | 0.403137672 | -5.277346194 |
| 1423870_at   | 0.056493744  | 9.417527862 | 0.875381194  | 0.4031705   | 0.4031705   | -5.277395409 |
| 1426490_at   | 0.053606236  | 8.968945855 | 0.875359397  | 0.403181768 | 0.403181768 | -5.277412301 |
| 1435206_at   | 0.099197188  | 5.699800987 | 0.875283102  | 0.40322121  | 0.40322121  | -5.277471422 |
| 1429133_at   | 0.063860901  | 4.988110436 | 0.875229831  | 0.403248751 | 0.403248751 | -5.2775127   |
| 1438233_at   | -0.064843372 | 8.672684183 | -0.875166059 | 0.403281723 | 0.403281723 | -5.277562112 |
| 1419048_at   | -0.076087056 | 8.120645733 | -0.875040348 | 0.403346724 | 0.403346724 | -5.277659506 |
| 1446884_at   | -0.07297065  | 3.131993177 | -0.874950182 | 0.40339335  | 0.40339335  | -5.277729355 |
| 1423077_at   | -0.059550893 | 8.513012764 | -0.874874243 | 0.403432623 | 0.403432623 | -5.277788178 |
| 1431166_at   | 0.08761411   | 6.393833903 | 0.874751212  | 0.403496255 | 0.403496255 | -5.277883469 |
| 1425346_at   | 0.060518387  | 9.171215843 | 0.874564187  | 0.403592998 | 0.403592998 | -5.278028306 |
| 1442929_at   | -0.087527026 | 3.76932236  | -0.874508058 | 0.403622036 | 0.403622036 | -5.278071768 |

|              |              |             |              |             |             |              |
|--------------|--------------|-------------|--------------|-------------|-------------|--------------|
| 1433893_s_at | -0.082157318 | 8.352641644 | -0.8744604   | 0.403646691 | 0.403646691 | -5.278108669 |
| 1417179_at   | 0.057023013  | 7.635428617 | 0.874443222  | 0.403655579 | 0.403655579 | -5.27812197  |
| 1454513_at   | -0.069579782 | 3.528741299 | -0.874325462 | 0.403716508 | 0.403716508 | -5.278213141 |
| 1446002_at   | -0.107494001 | 4.730793299 | -0.874316953 | 0.403720911 | 0.403720911 | -5.278219729 |
| 1441150_x_at | -0.073261202 | 6.447175119 | -0.874238108 | 0.40376171  | 0.40376171  | -5.278280766 |
| 1448257_at   | -0.137598411 | 5.176116578 | -0.874192615 | 0.403785251 | 0.403785251 | -5.278315982 |
| 1451155_at   | -0.059555005 | 3.640483577 | -0.874176689 | 0.403793493 | 0.403793493 | -5.27832831  |
| 1451849_a_at | -0.09788112  | 6.014145876 | -0.874160712 | 0.403801761 | 0.403801761 | -5.278340677 |
| 1438140_a_at | 0.073656941  | 7.348846865 | 0.874093894  | 0.403836341 | 0.403836341 | -5.278392396 |
| 1421278_s_at | 0.078411124  | 3.930300473 | 0.874067344  | 0.403850081 | 0.403850081 | -5.278412946 |
| 1454535_at   | 0.077448381  | 4.208178636 | 0.874041442  | 0.403863487 | 0.403863487 | -5.278432993 |
| 1442412_at   | 0.099973799  | 3.835318007 | 0.874040742  | 0.403863849 | 0.403863849 | -5.278433535 |
| 1454151_at   | 0.073954978  | 5.367137523 | 0.874017341  | 0.403875961 | 0.403875961 | -5.278451647 |
| 1441159_at   | -0.081271123 | 4.552990465 | -0.87401693  | 0.403876174 | 0.403876174 | -5.278451965 |
| 1421523_at   | -0.097944971 | 4.290993791 | -0.873999481 | 0.403885205 | 0.403885205 | -5.278465469 |
| 1418399_at   | 0.05973309   | 7.468263765 | 0.873806483  | 0.403985105 | 0.403985105 | -5.278614824 |
| 1434777_at   | -0.057020317 | 8.326418507 | -0.87377962  | 0.403999012 | 0.403999012 | -5.27863561  |
| 1424352_at   | -0.071933622 | 4.167125193 | -0.873779617 | 0.403999013 | 0.403999013 | -5.278635613 |
| 1425834_a_at | 0.089404577  | 6.405186753 | 0.87374683   | 0.404015987 | 0.404015987 | -5.278660982 |
| 1428957_at   | 0.064014263  | 6.512301279 | 0.873744355  | 0.404017268 | 0.404017268 | -5.278662897 |
| 1416063_x_at | -0.063346583 | 3.232484041 | -0.873712071 | 0.404033981 | 0.404033981 | -5.278687876 |
| 1419099_x_at | 0.075790302  | 5.498301133 | 0.873653612  | 0.404064247 | 0.404064247 | -5.278733106 |
| 1416198_at   | -0.068274784 | 8.723305563 | -0.873602667 | 0.404090624 | 0.404090624 | -5.278772521 |
| 1450458_at   | -0.131423498 | 5.730953286 | -0.873544651 | 0.404120664 | 0.404120664 | -5.278817403 |
| 1424306_at   | -0.089432056 | 7.112765159 | -0.873526362 | 0.404130134 | 0.404130134 | -5.278831552 |
| 1446226_at   | -0.090392644 | 6.058094421 | -0.873399194 | 0.404195984 | 0.404195984 | -5.278929921 |
| 1436218_at   | -0.108133    | 6.888132769 | -0.873285207 | 0.404255017 | 0.404255017 | -5.279018085 |
| 1444067_at   | -0.080718562 | 4.419220816 | -0.873269742 | 0.404263026 | 0.404263026 | -5.279030045 |
| 1429609_at   | 0.066865622  | 5.026137885 | 0.87326521   | 0.404265373 | 0.404265373 | -5.27903355  |
| 1446143_at   | 0.057656389  | 5.487368018 | 0.873264237  | 0.404265877 | 0.404265877 | -5.279034303 |
| 1435275_at   | -0.090312084 | 7.597390016 | -0.873244336 | 0.404276184 | 0.404276184 | -5.279049694 |
| 1424413_at   | 0.062777679  | 6.311031983 | 0.873227233  | 0.404285043 | 0.404285043 | -5.279062922 |
| 1436640_x_at | -0.065678365 | 9.166521382 | -0.873224832 | 0.404286287 | 0.404286287 | -5.279064779 |
| 1442073_at   | -0.089575138 | 5.363317083 | -0.873201509 | 0.404298366 | 0.404298366 | -5.279082815 |
| 1418013_at   | 0.078867874  | 6.07296181  | 0.872875596  | 0.404467197 | 0.404467197 | -5.279334821 |
| 1426259_at   | 0.093535393  | 8.509986603 | 0.872781444  | 0.404515979 | 0.404515979 | -5.279407608 |
| 1447329_at   | 0.447579626  | 4.690224746 | 0.872754937  | 0.404529714 | 0.404529714 | -5.279428099 |
| 1441008_at   | -0.058476211 | 3.380377148 | -0.872738383 | 0.404538291 | 0.404538291 | -5.279440895 |
| 1457381_at   | -0.172909399 | 6.111969614 | -0.872733525 | 0.404540809 | 0.404540809 | -5.279444651 |
| 1432781_at   | 0.079833786  | 5.445273837 | 0.872667521  | 0.404575011 | 0.404575011 | -5.27949567  |
| 1430679_at   | -0.061990879 | 5.483565184 | -0.8726359   | 0.404591397 | 0.404591397 | -5.279520112 |
| 1448722_s_at | 0.056481775  | 7.322293122 | 0.872592086  | 0.404614102 | 0.404614102 | -5.279553976 |
| 1445356_at   | -0.086570974 | 3.88144684  | -0.872485537 | 0.404669322 | 0.404669322 | -5.279636324 |
| 1458373_at   | 0.059405845  | 4.343609722 | 0.87243117   | 0.4046975   | 0.4046975   | -5.27967834  |
| 1435010_at   | 0.071483287  | 8.268937062 | 0.872291226  | 0.404770038 | 0.404770038 | -5.279786479 |
| 1425070_at   | -0.11246327  | 4.110941257 | -0.872257116 | 0.40478772  | 0.40478772  | -5.279812835 |
| 1429222_at   | 0.08489196   | 6.405823381 | 0.872256373  | 0.404788105 | 0.404788105 | -5.279813408 |
| 1430939_at   | -0.058934208 | 3.675486714 | -0.872251999 | 0.404790372 | 0.404790372 | -5.279816788 |
| 1447155_at   | -0.063851385 | 3.976405428 | -0.872233464 | 0.404799981 | 0.404799981 | -5.279831109 |
| 1432866_at   | 0.091064008  | 3.653124077 | 0.872199464  | 0.404817607 | 0.404817607 | -5.279857379 |
| 1432154_at   | 0.077482594  | 3.497143278 | 0.872098293  | 0.404870058 | 0.404870058 | -5.279935541 |
| 1418205_at   | -0.09887933  | 6.202672036 | -0.871891145 | 0.404977465 | 0.404977465 | -5.280095555 |
| 1447732_x_at | -0.076727322 | 3.265612323 | -0.871848253 | 0.404999708 | 0.404999708 | -5.280128683 |



|              |              |             |              |             |             |              |
|--------------|--------------|-------------|--------------|-------------|-------------|--------------|
| 1432902_at   | -0.103033276 | 3.707326126 | -0.871836812 | 0.405005641 | 0.405005641 | -5.28013752  |
| 1420120_at   | -0.086860752 | 3.867452234 | -0.871805878 | 0.405021683 | 0.405021683 | -5.280161412 |
| 1431486_at   | -0.06179911  | 3.477498618 | -0.871729279 | 0.405061408 | 0.405061408 | -5.280220569 |
| 1422328_at   | -0.059778385 | 4.404432145 | -0.871679998 | 0.405086967 | 0.405086967 | -5.280258626 |
| 1460226_at   | 0.056260493  | 3.395409727 | 0.871600973  | 0.405127955 | 0.405127955 | -5.280319649 |
| 1459522_s_at | 0.074389083  | 9.253090985 | 0.871598153  | 0.405129418 | 0.405129418 | -5.280321827 |
| 1421612_a_at | -0.065790924 | 9.596454082 | -0.87156043  | 0.405148985 | 0.405148985 | -5.280350955 |
| 1436807_x_at | -0.064483647 | 6.523525102 | -0.871532981 | 0.405163223 | 0.405163223 | -5.280372149 |
| 1449381_a_at | -0.086809282 | 5.264053151 | -0.871460861 | 0.405200634 | 0.405200634 | -5.280427833 |
| 1437772_s_at | 0.061549355  | 7.484599012 | 0.871399343  | 0.405232548 | 0.405232548 | -5.280475328 |
| 1446853_at   | -0.082347177 | 3.657217405 | -0.871379063 | 0.405243069 | 0.405243069 | -5.280490984 |
| 1426212_s_at | 0.0588183    | 8.38679517  | 0.871361574  | 0.405252142 | 0.405252142 | -5.280504486 |
| 1460431_at   | -0.070368015 | 6.460250676 | -0.87135065  | 0.40525781  | 0.40525781  | -5.280512919 |
| 1436307_at   | 0.062306881  | 7.812865027 | 0.871334463  | 0.405266208 | 0.405266208 | -5.280525415 |
| 1427378_at   | 0.088325627  | 5.904178817 | 0.87130897   | 0.405279434 | 0.405279434 | -5.280545095 |
| 1451681_at   | 0.07666152   | 3.890889317 | 0.871287176  | 0.405290741 | 0.405290741 | -5.280561919 |
| 1440961_at   | -0.078900643 | 4.661554373 | -0.871270931 | 0.40529917  | 0.40529917  | -5.280574459 |
| 1454155_at   | -0.076285569 | 4.107296648 | -0.871261887 | 0.405303862 | 0.405303862 | -5.28058144  |
| 1460495_s_at | -0.06253946  | 8.337239892 | -0.871204916 | 0.405333422 | 0.405333422 | -5.280625416 |
| 1418496_at   | -0.116210162 | 9.63968796  | -0.871195629 | 0.405338241 | 0.405338241 | -5.280632585 |
| 1457539_at   | -0.05463405  | 4.987705561 | -0.871061789 | 0.405407692 | 0.405407692 | -5.280735886 |
| 1434943_at   | 0.057291143  | 8.205459886 | 0.871060341  | 0.405408443 | 0.405408443 | -5.280737004 |
| 1423624_at   | 0.075756007  | 8.682682629 | 0.871058056  | 0.405409629 | 0.405409629 | -5.280738767 |
| 1428045_a_at | 0.14488427   | 7.717821952 | 0.87099982   | 0.405439851 | 0.405439851 | -5.280783711 |
| 1450799_at   | -0.077128983 | 5.854100864 | -0.870985249 | 0.405447413 | 0.405447413 | -5.280794956 |
| 1433643_at   | -0.064498375 | 9.543348983 | -0.870926866 | 0.405477713 | 0.405477713 | -5.28084001  |
| 1438277_at   | 0.066636987  | 7.330307223 | 0.870908001  | 0.405487504 | 0.405487504 | -5.280854567 |
| 1449735_at   | -0.063425158 | 3.775947666 | -0.870902013 | 0.405490611 | 0.405490611 | -5.280859188 |
| 1451146_at   | 0.116895668  | 8.65424519  | 0.870895717  | 0.405493879 | 0.405493879 | -5.280864046 |
| 1431328_at   | 0.111849194  | 7.088039249 | 0.870878308  | 0.405502915 | 0.405502915 | -5.28087748  |
| 1440653_at   | 0.063748615  | 7.829084569 | 0.870802127  | 0.405542456 | 0.405542456 | -5.280936262 |
| 1432097_a_at | -0.069651283 | 5.899675798 | -0.870792809 | 0.405547293 | 0.405547293 | -5.280943452 |
| 1418603_at   | 0.059975956  | 4.691160883 | 0.870746854  | 0.405571147 | 0.405571147 | -5.280978909 |
| 1448780_at   | 0.119188899  | 9.031620028 | 0.870740617  | 0.405574384 | 0.405574384 | -5.280983721 |
| 1425736_at   | -0.074011518 | 5.015012693 | -0.870703394 | 0.405593707 | 0.405593707 | -5.28101244  |
| 1419365_at   | 0.14239394   | 6.106157072 | 0.87067764   | 0.405607076 | 0.405607076 | -5.281032309 |
| 1424768_at   | 0.09274183   | 10.7374881  | 0.87066984   | 0.405611125 | 0.405611125 | -5.281038327 |
| 1434163_at   | -0.086526453 | 3.588785582 | -0.870625845 | 0.405633964 | 0.405633964 | -5.281072268 |
| 1444107_at   | -0.064571733 | 8.390869898 | -0.870489169 | 0.405704922 | 0.405704922 | -5.2811777   |
| 1439212_at   | -0.076760198 | 4.783548991 | -0.87048382  | 0.4057077   | 0.4057077   | -5.281181826 |
| 1437435_at   | -0.095088611 | 3.927285677 | -0.870397021 | 0.405752768 | 0.405752768 | -5.281248776 |
| 1430593_at   | -0.130886302 | 5.229599777 | -0.870283575 | 0.405811678 | 0.405811678 | -5.281336271 |
| 1420951_a_at | -0.05887968  | 8.504901372 | -0.87023362  | 0.40583762  | 0.40583762  | -5.281374795 |
| 1425432_at   | -0.063669126 | 4.453130743 | -0.87004559  | 0.405935276 | 0.405935276 | -5.281519785 |
| 1435295_at   | -0.065474781 | 7.472835499 | -0.870019894 | 0.405948623 | 0.405948623 | -5.281539597 |
| 1454619_at   | -0.103054114 | 9.209287595 | -0.869998977 | 0.405959488 | 0.405959488 | -5.281555724 |
| 1439936_at   | -0.070031734 | 5.230508115 | -0.869984416 | 0.405967051 | 0.405967051 | -5.281566951 |
| 1424967_x_at | -0.502024372 | 7.434906825 | -0.869939436 | 0.405990416 | 0.405990416 | -5.281601629 |
| 1458100_at   | 0.085320335  | 3.872818716 | 0.869926876  | 0.405996941 | 0.405996941 | -5.281611312 |
| 1445644_at   | -0.078616704 | 3.911955375 | -0.869809621 | 0.406057853 | 0.406057853 | -5.281701703 |
| 1419580_at   | 0.076257217  | 7.400873562 | 0.869797108  | 0.406064354 | 0.406064354 | -5.281711349 |
| 1447113_at   | 0.074557573  | 4.508598091 | 0.869759011  | 0.406084147 | 0.406084147 | -5.281740715 |
| 1448937_at   | 0.080019187  | 8.5301387   | 0.869753075  | 0.406087231 | 0.406087231 | -5.281745291 |

|              |              |             |              |             |             |              |
|--------------|--------------|-------------|--------------|-------------|-------------|--------------|
| 1439629_at   | -0.062699693 | 8.146357874 | -0.869747495 | 0.40609013  | 0.40609013  | -5.281749592 |
| 1416822_at   | -0.101106289 | 6.038872153 | -0.869681175 | 0.406124588 | 0.406124588 | -5.281800711 |
| 1450064_at   | 0.124110818  | 4.963618502 | 0.8696757    | 0.406127432 | 0.406127432 | -5.281804931 |
| 1446688_at   | 0.085044535  | 7.598874713 | 0.869671417  | 0.406129657 | 0.406129657 | -5.281808231 |
| 1452038_at   | 0.054059696  | 11.06175308 | 0.869612561  | 0.406160239 | 0.406160239 | -5.281853594 |
| 1422155_at   | -0.115453346 | 3.888335069 | -0.869540701 | 0.406197579 | 0.406197579 | -5.281908975 |
| 1426539_at   | -0.055680074 | 9.33495997  | -0.869334195 | 0.406304899 | 0.406304899 | -5.282068105 |
| 1447205_x_at | -0.059589521 | 7.042615068 | -0.869308668 | 0.406318166 | 0.406318166 | -5.282087774 |
| 1433667_at   | -0.080784963 | 5.46911956  | -0.869236189 | 0.406355839 | 0.406355839 | -5.282143616 |
| 1446454_at   | -0.109854352 | 4.272562412 | -0.869235672 | 0.406356107 | 0.406356107 | -5.282144014 |
| 1428703_at   | -0.109712658 | 4.542566065 | -0.869209658 | 0.406369629 | 0.406369629 | -5.282164055 |
| 1453817_at   | -0.054417545 | 4.009254554 | -0.869207238 | 0.406370887 | 0.406370887 | -5.28216592  |
| 1443881_at   | -0.059059655 | 9.732555548 | -0.869195106 | 0.406377193 | 0.406377193 | -5.282175267 |
| 1430919_at   | -0.093999391 | 4.037255284 | -0.869158355 | 0.406396297 | 0.406396297 | -5.282203579 |
| 1428551_at   | 0.079100957  | 8.155400031 | 0.869152229  | 0.406399481 | 0.406399481 | -5.282208298 |
| 1436476_at   | -0.079820355 | 5.703899044 | -0.869081376 | 0.406436313 | 0.406436313 | -5.28226288  |
| 1447603_x_at | -0.081900714 | 3.445866599 | -0.869076337 | 0.406438933 | 0.406438933 | -5.282266762 |
| 1433675_at   | -0.078723023 | 9.802809561 | -0.868998223 | 0.406479543 | 0.406479543 | -5.282326932 |
| 1429646_at   | -0.079429137 | 4.369283931 | -0.868977903 | 0.406490107 | 0.406490107 | -5.282342583 |
| 1428907_at   | 0.062178695  | 10.05967714 | 0.868918111  | 0.406521194 | 0.406521194 | -5.282388636 |
| 1446949_at   | 0.088478447  | 5.173650911 | 0.868836805  | 0.406563469 | 0.406563469 | -5.282451255 |
| 1453009_at   | 0.052200953  | 8.279121006 | 0.868830528  | 0.406566733 | 0.406566733 | -5.28245609  |
| 1439700_at   | -0.056712508 | 3.605613264 | -0.868810246 | 0.406577279 | 0.406577279 | -5.282471709 |
| 1459421_at   | -0.088665167 | 4.141302292 | -0.868805864 | 0.406579557 | 0.406579557 | -5.282475084 |
| 1446686_at   | 0.060562346  | 3.754001615 | 0.868745832  | 0.406610774 | 0.406610774 | -5.282521314 |
| 1454603_a_at | 0.060518424  | 9.610348836 | 0.868703086  | 0.406633002 | 0.406633002 | -5.28255423  |
| 1458004_at   | 0.066743253  | 3.340307523 | 0.868676522  | 0.406646817 | 0.406646817 | -5.282574686 |
| 1455653_at   | 0.071379563  | 6.065263121 | 0.868633886  | 0.40666899  | 0.40666899  | -5.282607516 |
| 1432892_at   | 0.059795421  | 3.681067606 | 0.868526444  | 0.406724869 | 0.406724869 | -5.282690241 |
| 1434789_at   | 0.093000242  | 7.368571108 | 0.868429247  | 0.406775425 | 0.406775425 | -5.28276507  |
| 1456500_at   | -0.136340695 | 7.888700869 | -0.868376931 | 0.406802638 | 0.406802638 | -5.282805344 |
| 1450124_a_at | -0.073619184 | 5.870192985 | -0.868327166 | 0.406828525 | 0.406828525 | -5.282843652 |
| 1431114_at   | -0.083840953 | 5.212492059 | -0.868305401 | 0.406839848 | 0.406839848 | -5.282860406 |
| 1417809_at   | -0.070521521 | 5.171214664 | -0.868304172 | 0.406840487 | 0.406840487 | -5.282861352 |
| 1434173_s_at | 0.071021371  | 9.903659397 | 0.868286654  | 0.4068496   | 0.4068496   | -5.282874836 |
| 1446540_at   | 0.117436416  | 6.336616599 | 0.868248156  | 0.406869628 | 0.406869628 | -5.282904469 |
| 1451120_at   | 0.067489334  | 10.19563843 | 0.868230856  | 0.406878628 | 0.406878628 | -5.282917784 |
| 1460317_s_at | -0.069597947 | 7.327761881 | -0.86808454  | 0.406954754 | 0.406954754 | -5.283030395 |
| 1431351_at   | -0.069615483 | 3.947231477 | -0.868069782 | 0.406962433 | 0.406962433 | -5.283041752 |
| 1423653_at   | -0.071790731 | 9.868037119 | -0.868052236 | 0.406971563 | 0.406971563 | -5.283055255 |
| 1438043_at   | -0.099492546 | 5.281619403 | -0.868016188 | 0.40699032  | 0.40699032  | -5.283082995 |
| 1444719_at   | 0.053639052  | 7.524755827 | 0.868000917  | 0.406998266 | 0.406998266 | -5.283094747 |
| 1421376_at   | 0.068099841  | 5.622869538 | 0.867985382  | 0.40700635  | 0.40700635  | -5.283106701 |
| 1421646_a_at | -0.086665181 | 7.896791643 | -0.867977624 | 0.407010387 | 0.407010387 | -5.283112671 |
| 1441774_at   | 0.099902232  | 5.206239055 | 0.867933558  | 0.407033318 | 0.407033318 | -5.28314658  |
| 1446473_at   | -0.077799328 | 5.734918527 | -0.867915018 | 0.407042966 | 0.407042966 | -5.283160845 |
| 1416395_at   | -0.059704615 | 8.927184462 | -0.867910562 | 0.407045285 | 0.407045285 | -5.283164275 |
| 1444007_at   | 0.0994621    | 4.458555155 | 0.867855767  | 0.407073801 | 0.407073801 | -5.283206436 |
| 1432931_at   | -0.069154935 | 3.81470362  | -0.867801299 | 0.407102148 | 0.407102148 | -5.283248343 |
| 1440594_at   | 0.070995869  | 6.99777189  | 0.867799232  | 0.407103223 | 0.407103223 | -5.283249933 |
| 1443777_at   | 0.073768166  | 3.452799924 | 0.867787543  | 0.407109307 | 0.407109307 | -5.283258927 |
| 1436049_at   | 0.066866329  | 7.016667195 | 0.867780552  | 0.407112945 | 0.407112945 | -5.283264305 |
| 1445848_at   | -0.094515339 | 3.972002564 | -0.867775692 | 0.407115475 | 0.407115475 | -5.283268044 |

|              |              |             |              |             |             |              |
|--------------|--------------|-------------|--------------|-------------|-------------|--------------|
| 1424333_at   | 0.081373706  | 7.931725122 | 0.867700396  | 0.407154665 | 0.407154665 | -5.283325971 |
| 1415727_at   | -0.055247693 | 10.18372323 | -0.867677257 | 0.407166709 | 0.407166709 | -5.283343772 |
| 1457665_x_at | -0.055135892 | 3.105109143 | -0.867667247 | 0.407171919 | 0.407171919 | -5.283351473 |
| 1451300_a_at | -0.066095379 | 8.454834616 | -0.86757697  | 0.407218911 | 0.407218911 | -5.283420918 |
| 1445207_at   | -0.089658754 | 3.469597787 | -0.867557064 | 0.407229273 | 0.407229273 | -5.283436229 |
| 1453111_a_at | -0.064863919 | 8.851527542 | -0.8675148   | 0.407251274 | 0.407251274 | -5.283468738 |
| 1459438_at   | -0.075742166 | 3.941227995 | -0.867468127 | 0.407275572 | 0.407275572 | -5.283504636 |
| 1443680_at   | -0.082346701 | 4.21842538  | -0.867428113 | 0.407296404 | 0.407296404 | -5.283535412 |
| 1423169_at   | -0.17441079  | 5.261581603 | -0.867398616 | 0.407311761 | 0.407311761 | -5.283558097 |
| 1427489_at   | -0.083782621 | 8.519725536 | -0.867396211 | 0.407313013 | 0.407313013 | -5.283559947 |
| 1442133_at   | 0.067418515  | 4.888162107 | 0.867301898  | 0.407362117 | 0.407362117 | -5.283632477 |
| 1454039_at   | -0.078426324 | 3.673507969 | -0.867223927 | 0.407402717 | 0.407402717 | -5.283692436 |
| 1455423_at   | 0.056732147  | 3.132076753 | 0.867211535  | 0.407409169 | 0.407409169 | -5.283701964 |
| 1417328_at   | -0.057484191 | 8.282282417 | -0.867204731 | 0.407412713 | 0.407412713 | -5.283707197 |
| 1423778_at   | 0.083851319  | 5.269284962 | 0.867187009  | 0.407421941 | 0.407421941 | -5.283720823 |
| 1459482_at   | -0.05942367  | 4.904426026 | -0.867156751 | 0.407437698 | 0.407437698 | -5.283744089 |
| 1425345_at   | -0.071148369 | 5.271846728 | -0.867057072 | 0.407489607 | 0.407489607 | -5.283820729 |
| 1438384_at   | -0.080788569 | 3.38686739  | -0.867026745 | 0.407505401 | 0.407505401 | -5.283844044 |
| 1421745_at   | 0.065335682  | 4.142876995 | 0.867023033  | 0.407507334 | 0.407507334 | -5.283846898 |
| 1429186_a_at | 0.059292978  | 7.543170577 | 0.86700905   | 0.407514617 | 0.407514617 | -5.283857648 |
| 1433041_at   | -0.081678988 | 5.380946441 | -0.867008    | 0.407515164 | 0.407515164 | -5.283858455 |
| 1441924_x_at | 0.100243927  | 6.287875846 | 0.867004952  | 0.407516752 | 0.407516752 | -5.283860799 |
| 1425909_at   | 0.063694539  | 5.399855466 | 0.866956726  | 0.407541869 | 0.407541869 | -5.283897874 |
| 1427428_at   | 0.06928644   | 4.154743411 | 0.866873141  | 0.407585405 | 0.407585405 | -5.283962127 |
| 1439954_at   | -0.102923256 | 5.775663768 | -0.86681483  | 0.407615778 | 0.407615778 | -5.284006949 |
| 1430574_at   | -0.074113457 | 7.149718426 | -0.866812035 | 0.407617234 | 0.407617234 | -5.284009097 |
| 1456128_at   | -0.082100833 | 5.399381186 | -0.866789117 | 0.407629173 | 0.407629173 | -5.284026713 |
| 1451861_at   | -0.083387146 | 4.116873932 | -0.866766899 | 0.407640746 | 0.407640746 | -5.28404379  |
| 1443339_at   | 0.088689294  | 6.254865884 | 0.866711625  | 0.407669541 | 0.407669541 | -5.284086273 |
| 1415789_a_at | 0.068927092  | 8.152109234 | 0.866688002  | 0.407681847 | 0.407681847 | -5.284104429 |
| 1425422_a_at | 0.060533576  | 7.723034933 | 0.866614463  | 0.40772016  | 0.40772016  | -5.284160945 |
| 1434320_at   | 0.07482747   | 9.619130497 | 0.866550504  | 0.407753483 | 0.407753483 | -5.284210097 |
| 1433173_at   | 0.110612189  | 6.355052402 | 0.866516671  | 0.407771111 | 0.407771111 | -5.284236095 |
| 1440189_at   | -0.077697851 | 4.731324367 | -0.866515895 | 0.407771515 | 0.407771515 | -5.284236691 |
| 1421797_a_at | 0.080583508  | 7.977419627 | 0.866454119  | 0.407803705 | 0.407803705 | -5.284284161 |
| 1443228_at   | -0.054582625 | 3.365108633 | -0.86637824  | 0.407843244 | 0.407843244 | -5.284342462 |
| 1442993_at   | -0.122696099 | 5.203733373 | -0.86637683  | 0.407843979 | 0.407843979 | -5.284343545 |
| 1428796_at   | 0.055988847  | 8.62243428  | 0.866347141  | 0.40785945  | 0.40785945  | -5.284366356 |
| 1452275_at   | -0.057008216 | 5.05883654  | -0.866272913 | 0.407898133 | 0.407898133 | -5.284423384 |
| 1451909_a_at | 0.058052046  | 8.817816237 | 0.866248889  | 0.407910654 | 0.407910654 | -5.28444184  |
| 1446983_at   | 0.080938977  | 4.541469186 | 0.866209459  | 0.407931203 | 0.407931203 | -5.28447213  |
| 1456669_at   | -0.058980647 | 3.837671507 | -0.866200003 | 0.407936132 | 0.407936132 | -5.284479394 |
| 1456132_x_at | 0.083500763  | 3.142263456 | 0.866179411  | 0.407946864 | 0.407946864 | -5.284495213 |
| 1454391_at   | 0.08601443   | 4.071322274 | 0.866168909  | 0.407952338 | 0.407952338 | -5.28450328  |
| 1422170_at   | -0.082225303 | 3.88141207  | -0.866118846 | 0.407978432 | 0.407978432 | -5.284541737 |
| 1439841_at   | -0.120711832 | 5.140901556 | -0.86611586  | 0.407979988 | 0.407979988 | -5.28454403  |
| 1455940_x_at | 0.079673701  | 11.16909003 | 0.866114018  | 0.407980948 | 0.407980948 | -5.284545445 |
| 1456232_at   | 0.106277676  | 7.453492    | 0.866059619  | 0.408009303 | 0.408009303 | -5.284587229 |
| 1446689_at   | -0.068496245 | 3.917675119 | -0.866031368 | 0.408024029 | 0.408024029 | -5.284608928 |
| 1416736_at   | -0.083424695 | 8.965222706 | -0.866031361 | 0.408024033 | 0.408024033 | -5.284608934 |
| 1432943_at   | -0.085420514 | 4.012633591 | -0.866023788 | 0.40802798  | 0.40802798  | -5.28461475  |
| 1458377_at   | 0.07320889   | 4.669151767 | 0.866009309  | 0.408035528 | 0.408035528 | -5.284625871 |
| 1431934_at   | -0.053683725 | 3.82013173  | -0.866005881 | 0.408037315 | 0.408037315 | -5.284628504 |

|              |              |             |              |             |             |              |
|--------------|--------------|-------------|--------------|-------------|-------------|--------------|
| 1458190_at   | -0.082261456 | 4.907126715 | -0.865941274 | 0.408070994 | 0.408070994 | -5.284678124 |
| 1430774_at   | 0.064972033  | 6.727342788 | 0.865928313  | 0.408077751 | 0.408077751 | -5.284688078 |
| 1459419_at   | 0.096780373  | 5.146154535 | 0.865825634  | 0.408131281 | 0.408131281 | -5.284766931 |
| 1431450_at   | -0.085336367 | 4.046165383 | -0.865819267 | 0.4081346   | 0.4081346   | -5.28477182  |
| 1447688_at   | -0.069783101 | 5.014884638 | -0.865810467 | 0.408139189 | 0.408139189 | -5.284778578 |
| 1421276_a_at | 0.076965504  | 6.725977757 | 0.865771542  | 0.408159483 | 0.408159483 | -5.284808468 |
| 1436854_at   | 0.060721164  | 7.50742924  | 0.865758775  | 0.40816614  | 0.40816614  | -5.284818271 |
| 1452074_at   | 0.094233799  | 3.841675561 | 0.865687054  | 0.408203536 | 0.408203536 | -5.284873342 |
| 1426839_at   | 0.064502762  | 7.984078044 | 0.865593724  | 0.408252203 | 0.408252203 | -5.284944998 |
| 1428262_s_at | 0.057433001  | 11.57352637 | 0.865559964  | 0.408269808 | 0.408269808 | -5.284970917 |
| 1423457_at   | 0.089216178  | 5.977110355 | 0.865547556  | 0.408276278 | 0.408276278 | -5.284980443 |
| 1436941_at   | 0.059980687  | 6.428019616 | 0.865535789  | 0.408282414 | 0.408282414 | -5.284989476 |
| 1418510_s_at | -0.061681367 | 7.816422152 | -0.865438272 | 0.408333271 | 0.408333271 | -5.285064337 |
| 1451731_at   | 0.069170661  | 7.455781278 | 0.865355969  | 0.408376198 | 0.408376198 | -5.285127513 |
| 1438358_x_at | 0.058519755  | 3.228331895 | 0.865325448  | 0.408392117 | 0.408392117 | -5.28515094  |
| 1439459_x_at | 0.099737851  | 10.29880119 | 0.865306976  | 0.408401752 | 0.408401752 | -5.285165118 |
| 1456899_at   | 0.070172481  | 6.317608257 | 0.865255614  | 0.408428543 | 0.408428543 | -5.285204539 |
| 1451486_at   | -0.084600114 | 4.932904577 | -0.865242171 | 0.408435555 | 0.408435555 | -5.285214857 |
| 1449949_a_at | 0.06773825   | 6.577090572 | 0.8651762    | 0.408469969 | 0.408469969 | -5.285265486 |
| 1430618_at   | 0.130386518  | 5.858839073 | 0.865159749  | 0.408478551 | 0.408478551 | -5.285278111 |
| 1419128_at   | -0.106007043 | 4.567338684 | -0.865146742 | 0.408485336 | 0.408485336 | -5.285288094 |
| 1427934_at   | 0.06858186   | 8.872163034 | 0.865006585  | 0.408558457 | 0.408558457 | -5.285395645 |
| 1423441_at   | 0.082759835  | 9.03041875  | 0.865004284  | 0.408559658 | 0.408559658 | -5.285397411 |
| 1438853_x_at | 0.072891777  | 9.523511917 | 0.864985922  | 0.408569238 | 0.408569238 | -5.2854115   |
| 1454499_at   | -0.068766088 | 6.276959631 | -0.864831416 | 0.408649857 | 0.408649857 | -5.285530043 |
| 1424328_s_at | 0.055953758  | 6.397262718 | 0.864782751  | 0.408675252 | 0.408675252 | -5.285567377 |
| 1446880_at   | 0.092020574  | 6.568135497 | 0.864680928  | 0.40872839  | 0.40872839  | -5.285645486 |
| 1446138_at   | -0.078059288 | 7.49681681  | -0.864677753 | 0.408730047 | 0.408730047 | -5.285647922 |
| 1439235_x_at | -0.054410177 | 9.037535171 | -0.864657379 | 0.40874068  | 0.40874068  | -5.28566355  |
| 1449532_at   | -0.141624031 | 5.991356821 | -0.864486686 | 0.408829772 | 0.408829772 | -5.28579447  |
| 1456419_at   | 0.075701064  | 7.630251701 | 0.864411879  | 0.408868821 | 0.408868821 | -5.285851839 |
| 1442112_at   | -0.101047552 | 4.560524827 | -0.864384595 | 0.408883064 | 0.408883064 | -5.285872762 |
| 1423029_at   | -0.055172161 | 3.847116797 | -0.864240292 | 0.408958399 | 0.408958399 | -5.285983414 |
| 1455905_at   | 0.163606367  | 8.257881846 | 0.864160687  | 0.408999962 | 0.408999962 | -5.286044448 |
| 1452578_at   | 0.076107183  | 3.657641466 | 0.864147027  | 0.409007094 | 0.409007094 | -5.286054921 |
| 1452226_at   | -0.065933881 | 9.384412938 | -0.86412155  | 0.409020397 | 0.409020397 | -5.286074454 |
| 1436209_at   | 0.075837364  | 6.930127401 | 0.864117091  | 0.409022725 | 0.409022725 | -5.286077873 |
| 1437064_at   | 0.10098438   | 4.322762995 | 0.863998921  | 0.409084431 | 0.409084431 | -5.286168462 |
| 1437190_at   | -0.110638731 | 4.296754898 | -0.863980349 | 0.40909413  | 0.40909413  | -5.2861827   |
| 1417605_s_at | -0.065956734 | 7.966378564 | -0.863969794 | 0.409099642 | 0.409099642 | -5.28619079  |
| 1441545_at   | -0.109458554 | 7.174267701 | -0.863964143 | 0.409102593 | 0.409102593 | -5.286195122 |
| 1455188_at   | 0.061605676  | 7.175990362 | 0.863926417  | 0.409122294 | 0.409122294 | -5.28622404  |
| 1443007_at   | 0.065356615  | 6.719730356 | 0.863889313  | 0.409141672 | 0.409141672 | -5.286252481 |
| 1434428_at   | -0.084586736 | 6.266942701 | -0.863860645 | 0.409156644 | 0.409156644 | -5.286274454 |
| 1423678_at   | 0.05968347   | 8.075754332 | 0.863761271  | 0.409208547 | 0.409208547 | -5.286350617 |
| 1438615_x_at | 0.078856203  | 5.996044768 | 0.863723479  | 0.409228287 | 0.409228287 | -5.28637958  |
| 1450690_at   | -0.066951595 | 9.804899917 | -0.863668272 | 0.409257124 | 0.409257124 | -5.286421887 |
| 1455454_at   | -0.056188622 | 3.645969775 | -0.863668039 | 0.409257246 | 0.409257246 | -5.286422066 |
| 1457632_s_at | -0.087299796 | 9.42636913  | -0.863521769 | 0.409333656 | 0.409333656 | -5.286534148 |
| 1417078_at   | -0.054088639 | 5.664153744 | -0.863499331 | 0.409345378 | 0.409345378 | -5.28655134  |
| 1428477_at   | 0.058609776  | 7.752730176 | 0.863452012  | 0.4093701   | 0.4093701   | -5.286587595 |
| 1460704_at   | 0.065944367  | 8.705961003 | 0.86344765   | 0.409372379 | 0.409372379 | -5.286590937 |
| 1456897_at   | -0.107985126 | 6.141733865 | -0.863434054 | 0.409379482 | 0.409379482 | -5.286601354 |

|              |              |             |              |             |             |              |
|--------------|--------------|-------------|--------------|-------------|-------------|--------------|
| 1458621_at   | -0.068021904 | 3.433486703 | -0.863415223 | 0.409389321 | 0.409389321 | -5.286615781 |
| 1446135_at   | 0.057496157  | 3.518621601 | 0.863406408  | 0.409393927 | 0.409393927 | -5.286622535 |
| 1435336_at   | 0.067118113  | 7.03763097  | 0.863386029  | 0.409404575 | 0.409404575 | -5.286638148 |
| 1427079_at   | -0.091082457 | 6.910742526 | -0.863329093 | 0.409434324 | 0.409434324 | -5.286681766 |
| 1445577_at   | 0.062247111  | 5.552334022 | 0.863303953  | 0.40944746  | 0.40944746  | -5.286701024 |
| 1428906_at   | 0.066118477  | 10.14522892 | 0.863303488  | 0.409447703 | 0.409447703 | -5.286701381 |
| 1446426_at   | -0.061578888 | 8.194613504 | -0.863232355 | 0.409484873 | 0.409484873 | -5.28675587  |
| 1428053_at   | -0.059560021 | 4.436084349 | -0.863207906 | 0.409497649 | 0.409497649 | -5.286774598 |
| 1454138_a_at | -0.055092572 | 3.182908856 | -0.863201037 | 0.409501239 | 0.409501239 | -5.286779859 |
| 1419846_at   | -0.057926704 | 3.736652761 | -0.863154654 | 0.409525478 | 0.409525478 | -5.286815387 |
| 1444662_at   | -0.108389426 | 5.557622201 | -0.863112579 | 0.409547467 | 0.409547467 | -5.286847614 |
| 1440969_at   | 0.075416107  | 6.588112251 | 0.863098062  | 0.409555053 | 0.409555053 | -5.286858732 |
| 1424670_s_at | 0.065291566  | 9.829223064 | 0.862865629  | 0.409676541 | 0.409676541 | -5.287036733 |
| 1451463_at   | -0.204323056 | 4.852205053 | -0.862855298 | 0.409681941 | 0.409681941 | -5.287044643 |
| 1431960_at   | -0.056364409 | 7.146810786 | -0.862830064 | 0.409695132 | 0.409695132 | -5.287063966 |
| 1438693_at   | -0.058789531 | 7.588709466 | -0.862766655 | 0.40972828  | 0.40972828  | -5.287112517 |
| 1445095_at   | -0.095519024 | 4.471508987 | -0.862624067 | 0.409802826 | 0.409802826 | -5.287221683 |
| 1452510_at   | -0.109490264 | 4.611636779 | -0.862503101 | 0.409866076 | 0.409866076 | -5.287314283 |
| 1460444_at   | 0.087678395  | 6.370965041 | 0.862449552  | 0.409894077 | 0.409894077 | -5.287355272 |
| 1452793_at   | -0.104606472 | 5.068849502 | -0.862380018 | 0.409930439 | 0.409930439 | -5.287408493 |
| 1452934_at   | -0.100992799 | 4.222072194 | -0.862346755 | 0.409947834 | 0.409947834 | -5.28743395  |
| 1444723_at   | -0.084093442 | 4.153249669 | -0.862290793 | 0.409977102 | 0.409977102 | -5.28747678  |
| 1437282_at   | 0.085638744  | 4.114416562 | 0.862266254  | 0.409989936 | 0.409989936 | -5.28749556  |
| 1448058_s_at | 0.089092283  | 5.706013904 | 0.862223372  | 0.410012364 | 0.410012364 | -5.287528376 |
| 1440586_at   | 0.084587646  | 7.156283836 | 0.862160515  | 0.410045241 | 0.410045241 | -5.287576476 |
| 1430664_at   | 0.077649148  | 5.477560233 | 0.862052137  | 0.410101931 | 0.410101931 | -5.287659403 |
| 1448931_at   | 0.097160341  | 7.927777852 | 0.86205058   | 0.410102745 | 0.410102745 | -5.287660594 |
| 1436831_at   | -0.072178367 | 3.592415667 | -0.862011366 | 0.410123259 | 0.410123259 | -5.287690598 |
| 1420784_at   | -0.07381617  | 4.659383208 | -0.861995576 | 0.410131519 | 0.410131519 | -5.287702678 |
| 1459655_at   | 0.055302838  | 4.584620663 | 0.86193162   | 0.410164978 | 0.410164978 | -5.287751609 |
| 1418914_s_at | -0.068453167 | 3.412995665 | -0.861928639 | 0.410166537 | 0.410166537 | -5.287753889 |
| 1445658_at   | -0.059889168 | 5.681790475 | -0.861913769 | 0.410174317 | 0.410174317 | -5.287765265 |
| 1443619_at   | 0.101615831  | 5.800314131 | 0.861899291  | 0.410181891 | 0.410181891 | -5.287776341 |
| 1448553_at   | -0.335299183 | 6.733767605 | -0.861793121 | 0.41023744  | 0.41023744  | -5.287857559 |
| 1455467_at   | -0.10557168  | 6.425142351 | -0.861771324 | 0.410248844 | 0.410248844 | -5.287874232 |
| 1457777_at   | 0.065862108  | 3.460307158 | 0.861767092  | 0.410251059 | 0.410251059 | -5.287877469 |
| 1427962_at   | 0.094944948  | 8.331814736 | 0.861744193  | 0.410263041 | 0.410263041 | -5.287894985 |
| 1421176_at   | 0.075466237  | 4.163309653 | 0.861738109  | 0.410266224 | 0.410266224 | -5.287899638 |
| 1436804_s_at | 0.083952308  | 7.904692543 | 0.861713234  | 0.41027924  | 0.41027924  | -5.287918665 |
| 1417826_at   | -0.115955315 | 8.376701593 | -0.86164528  | 0.410314799 | 0.410314799 | -5.287970639 |
| 1437161_x_at | 0.067698695  | 6.997871321 | 0.861644018  | 0.410315459 | 0.410315459 | -5.287971604 |
| 1427536_at   | -0.18706872  | 6.709297627 | -0.861599764 | 0.410338618 | 0.410338618 | -5.288005451 |
| 1426467_s_at | -0.059402143 | 8.921610984 | -0.861344119 | 0.410472416 | 0.410472416 | -5.288200942 |
| 1449365_at   | 0.074417068  | 3.531096777 | 0.861174794  | 0.410561053 | 0.410561053 | -5.288330398 |
| 1449673_s_at | -0.082162001 | 4.270200779 | -0.86116911  | 0.410564029 | 0.410564029 | -5.288334743 |
| 1457173_at   | 0.058465195  | 7.267995195 | 0.861163271  | 0.410567086 | 0.410567086 | -5.288339207 |
| 1420084_at   | -0.054510421 | 3.301211866 | -0.861105916 | 0.410597113 | 0.410597113 | -5.288383052 |
| 1455089_at   | -0.066524929 | 9.00594557  | -0.86100181  | 0.410651619 | 0.410651619 | -5.288462629 |
| 1432953_at   | -0.07551757  | 3.350420759 | -0.860968886 | 0.410668858 | 0.410668858 | -5.288487794 |
| 1448483_a_at | -0.072779407 | 10.60202062 | -0.860941884 | 0.410682997 | 0.410682997 | -5.288508433 |
| 1422619_at   | 0.061575161  | 9.191380066 | 0.860850781  | 0.410730702 | 0.410730702 | -5.28857806  |
| 1423912_at   | -0.056215772 | 8.316298508 | -0.860842429 | 0.410735076 | 0.410735076 | -5.288584443 |
| 1444804_at   | -0.068935688 | 3.449195549 | -0.860778017 | 0.410768807 | 0.410768807 | -5.288633667 |

|              |              |             |              |             |             |              |
|--------------|--------------|-------------|--------------|-------------|-------------|--------------|
| 1457048_at   | 0.08585834   | 3.284060313 | 0.860751237  | 0.410782832 | 0.410782832 | -5.288654131 |
| 1426025_s_at | -0.075781952 | 7.525599698 | -0.860745199 | 0.410785994 | 0.410785994 | -5.288658746 |
| 1438044_at   | 0.066987977  | 3.895002859 | 0.860734526  | 0.410791584 | 0.410791584 | -5.288666902 |
| 1429400_at   | -0.094637908 | 9.319845857 | -0.860724446 | 0.410796863 | 0.410796863 | -5.288674604 |
| 1450617_at   | -0.081234276 | 4.183337948 | -0.860698088 | 0.410810667 | 0.410810667 | -5.288694745 |
| 1435837_at   | -0.063974989 | 3.930115652 | -0.860689704 | 0.410815058 | 0.410815058 | -5.288701151 |
| 1419715_at   | 0.082618158  | 4.049217745 | 0.860569466  | 0.410878035 | 0.410878035 | -5.288793023 |
| 1459695_at   | -0.166448208 | 6.622571289 | -0.86055863  | 0.410883711 | 0.410883711 | -5.288801301 |
| 1422367_at   | -0.090467162 | 4.503254725 | -0.860522445 | 0.410902665 | 0.410902665 | -5.288828947 |
| 1448008_at   | 0.073972111  | 6.848058074 | 0.860420966  | 0.410955823 | 0.410955823 | -5.288906473 |
| 1435142_at   | -0.081233039 | 6.313413839 | -0.860417477 | 0.410957651 | 0.410957651 | -5.288909138 |
| 1458005_at   | -0.079166586 | 3.800361523 | -0.860354979 | 0.410990392 | 0.410990392 | -5.288956879 |
| 1437411_at   | -0.102445161 | 6.080853555 | -0.860328936 | 0.411004036 | 0.411004036 | -5.288976773 |
| 1446980_at   | 0.080625571  | 5.125240114 | 0.860327918  | 0.411004569 | 0.411004569 | -5.28897755  |
| 1437367_at   | -0.098390639 | 4.153117203 | -0.860295596 | 0.411021503 | 0.411021503 | -5.289002239 |
| 1420326_s_at | 0.059134311  | 8.996594175 | 0.860289959  | 0.411024456 | 0.411024456 | -5.289006545 |
| 1417214_at   | 0.069788659  | 6.705220732 | 0.860184959  | 0.411079471 | 0.411079471 | -5.289086743 |
| 1420039_s_at | 0.11309834   | 4.348275276 | 0.86014342   | 0.411101236 | 0.411101236 | -5.289118467 |
| 1451472_at   | 0.087791907  | 5.336531504 | 0.860080406  | 0.411134256 | 0.411134256 | -5.28916659  |
| 1428190_at   | -0.066841404 | 8.542434241 | -0.860034404 | 0.411158362 | 0.411158362 | -5.28920172  |
| 1433888_at   | 0.090298539  | 4.187748826 | 0.85998949   | 0.411181899 | 0.411181899 | -5.289236017 |
| 1454261_at   | -0.074754018 | 3.814814653 | -0.859982244 | 0.411185697 | 0.411185697 | -5.28924155  |
| 1448337_at   | 0.062924824  | 7.761462286 | 0.859958373  | 0.411198207 | 0.411198207 | -5.289259777 |
| 1447820_x_at | -0.081439214 | 3.820469312 | -0.859951263 | 0.411201933 | 0.411201933 | -5.289265206 |
| 1421713_at   | -0.06604224  | 4.178506162 | -0.859925411 | 0.411215482 | 0.411215482 | -5.289284946 |
| 1440244_at   | 0.121066082  | 7.449157463 | 0.859860106  | 0.411249708 | 0.411249708 | -5.289334808 |
| 1457825_x_at | 0.087084483  | 8.288434965 | 0.859858934  | 0.411250323 | 0.411250323 | -5.289335703 |
| 1415723_at   | 0.062324362  | 11.14214661 | 0.859856271  | 0.411251718 | 0.411251718 | -5.289337736 |
| 1453585_at   | -0.088694008 | 4.891793544 | -0.859826662 | 0.411267237 | 0.411267237 | -5.289360343 |
| 1447562_at   | -0.074571433 | 3.53393327  | -0.859821148 | 0.411270127 | 0.411270127 | -5.289364552 |
| 1448547_at   | 0.110075935  | 6.847580941 | 0.859795234  | 0.41128371  | 0.41128371  | -5.289384337 |
| 1449507_a_at | -0.0576276   | 9.746537352 | -0.859794459 | 0.411284116 | 0.411284116 | -5.289384929 |
| 1446585_at   | -0.105748694 | 5.302112476 | -0.859728063 | 0.411318919 | 0.411318919 | -5.289435617 |
| 1446277_at   | 0.073563928  | 3.885847761 | 0.859588721  | 0.411391964 | 0.411391964 | -5.289541985 |
| 1420339_at   | -0.064757544 | 6.587194301 | -0.859561933 | 0.411406007 | 0.411406007 | -5.289562432 |
| 1453729_a_at | 0.054568691  | 13.432539   | 0.859560484  | 0.411406767 | 0.411406767 | -5.289563537 |
| 1417800_at   | 0.052758037  | 9.602821219 | 0.859544418  | 0.41141519  | 0.41141519  | -5.2895758   |
| 1422410_at   | -0.074607798 | 3.528502711 | -0.859530934 | 0.411422259 | 0.411422259 | -5.289586092 |
| 1436720_s_at | 0.090316455  | 3.153279411 | 0.859528551  | 0.411423508 | 0.411423508 | -5.289587911 |
| 1457479_at   | -0.072957947 | 7.017482616 | -0.859511776 | 0.411432303 | 0.411432303 | -5.289600714 |
| 1450538_s_at | -0.083403713 | 4.669873063 | -0.859428017 | 0.411476218 | 0.411476218 | -5.289664641 |
| 1418070_at   | -0.104357722 | 7.911359241 | -0.859381356 | 0.411500684 | 0.411500684 | -5.289700251 |
| 1458625_at   | -0.06686795  | 3.929518137 | -0.859323127 | 0.411531216 | 0.411531216 | -5.289744687 |
| 1457395_at   | 0.078621963  | 5.267862088 | 0.85931318   | 0.411536432 | 0.411536432 | -5.289752278 |
| 1456473_x_at | 0.057180154  | 4.573819078 | 0.859295702  | 0.411545598 | 0.411545598 | -5.289765615 |
| 1436168_at   | -0.085977542 | 5.858342928 | -0.859196751 | 0.411597488 | 0.411597488 | -5.28984112  |
| 1453345_at   | 0.097061576  | 4.896727357 | 0.859185768  | 0.411603248 | 0.411603248 | -5.2898495   |
| 1431424_at   | -0.061390775 | 8.345891125 | -0.859101326 | 0.411647534 | 0.411647534 | -5.289913927 |
| 1451497_at   | 0.053287635  | 4.379785969 | 0.859027629  | 0.411686186 | 0.411686186 | -5.289970151 |
| 1428426_s_at | 0.064465143  | 7.839441381 | 0.85896582   | 0.411718607 | 0.411718607 | -5.290017303 |
| 1448329_at   | -0.066165793 | 3.508574391 | -0.858838073 | 0.411785618 | 0.411785618 | -5.290114747 |
| 1433420_at   | -0.077870265 | 5.770785073 | -0.858675674 | 0.411870818 | 0.411870818 | -5.290238608 |
| 1421340_at   | 0.080817234  | 6.492547304 | 0.858655262  | 0.411881527 | 0.411881527 | -5.290254174 |

|                    |              |             |              |             |             |              |
|--------------------|--------------|-------------|--------------|-------------|-------------|--------------|
| 1423039_a_at       | -0.090448972 | 9.699340021 | -0.858615572 | 0.411902352 | 0.411902352 | -5.290284441 |
| 1456600_a_at       | 0.052994648  | 10.39754591 | 0.858582758  | 0.411919569 | 0.411919569 | -5.290309464 |
| 1422289_a_at       | -0.080924526 | 4.044915505 | -0.858547864 | 0.411937879 | 0.411937879 | -5.290336073 |
| 1417890_at         | -0.073832124 | 7.838990619 | -0.85851987  | 0.411952568 | 0.411952568 | -5.290357418 |
| 1446129_at         | 0.077173131  | 5.618058564 | 0.858514073  | 0.41195561  | 0.41195561  | -5.290361839 |
| 1426138_a_at       | 0.062294409  | 9.747550601 | 0.858474858  | 0.411976188 | 0.411976188 | -5.29039174  |
| 1456268_at         | 0.071606242  | 4.331163678 | 0.85843082   | 0.411999298 | 0.411999298 | -5.290425317 |
| 1430148_at         | -0.058812172 | 4.964687685 | -0.858425312 | 0.412002189 | 0.412002189 | -5.290429516 |
| 1460001_at         | 0.074359513  | 7.295721915 | 0.858405098  | 0.412012797 | 0.412012797 | -5.290444928 |
| 1438753_at         | -0.06146085  | 6.680868928 | -0.85840316  | 0.412013814 | 0.412013814 | -5.290446406 |
| 1443636_at         | -0.053873977 | 7.320627507 | -0.858397101 | 0.412016993 | 0.412016993 | -5.290451025 |
| 1444694_at         | -0.060878301 | 3.957901706 | -0.85839628  | 0.412017425 | 0.412017425 | -5.290451652 |
| 1449566_at         | -0.071673095 | 5.908977811 | -0.858396243 | 0.412017444 | 0.412017444 | -5.29045168  |
| 1421591_at         | -0.067172671 | 3.167454831 | -0.858282787 | 0.412076988 | 0.412076988 | -5.290538176 |
| 1458581_at         | -0.089597327 | 5.469728277 | -0.858212049 | 0.412114116 | 0.412114116 | -5.2905921   |
| 1442269_at         | -0.070957047 | 4.948482476 | -0.858104155 | 0.412170751 | 0.412170751 | -5.290674342 |
| 1435369_at         | 0.069933118  | 8.543014656 | 0.858097456  | 0.412174267 | 0.412174267 | -5.290679447 |
| 1442535_at         | -0.071968172 | 6.818009989 | -0.858058161 | 0.412194895 | 0.412194895 | -5.290709398 |
| 1431971_at         | -0.066057819 | 3.61240729  | -0.858041895 | 0.412203433 | 0.412203433 | -5.290721794 |
| 1439177_at         | 0.10558792   | 4.417770884 | 0.858024993  | 0.412212307 | 0.412212307 | -5.290734677 |
| 1426245_s_at       | -0.056106642 | 9.2537592   | -0.858005078 | 0.412222761 | 0.412222761 | -5.290749854 |
| 1459252_at         | -0.05398877  | 3.525449066 | -0.857934997 | 0.412259554 | 0.412259554 | -5.290803264 |
| 1443424_at         | -0.088411232 | 3.769403355 | -0.857900328 | 0.412277755 | 0.412277755 | -5.290829683 |
| 1415737_at         | -0.082718732 | 9.122244685 | -0.857874847 | 0.412291133 | 0.412291133 | -5.290849101 |
| 1435081_at         | -0.061735482 | 7.824782172 | -0.857795699 | 0.412332691 | 0.412332691 | -5.290909412 |
| 1420430_a_at       | 0.076635161  | 4.479775717 | 0.857780125  | 0.412340869 | 0.412340869 | -5.290921279 |
| 1421944_a_at       | -0.07869513  | 3.677116949 | -0.857742191 | 0.412360787 | 0.412360787 | -5.290950182 |
| 1456368_at         | -0.098803784 | 3.84192062  | -0.857716167 | 0.412374453 | 0.412374453 | -5.290970011 |
| 1460095_at         | 0.096089591  | 3.611784161 | 0.857656218  | 0.412405933 | 0.412405933 | -5.291015685 |
| 1454093_at         | -0.054248968 | 3.450976988 | -0.85764613  | 0.412411231 | 0.412411231 | -5.291023372 |
| 1441191_at         | -0.061506533 | 4.288133713 | -0.857585663 | 0.412442985 | 0.412442985 | -5.291069437 |
| 1439330_at         | 0.081565138  | 7.268150887 | 0.857561245  | 0.412455809 | 0.412455809 | -5.291088039 |
| 1452505_at         | -0.064848245 | 3.827050807 | -0.857547941 | 0.412462796 | 0.412462796 | -5.291098174 |
| 1441629_at         | 0.075773156  | 7.85193225  | 0.857530256  | 0.412472084 | 0.412472084 | -5.291111646 |
| 1454571_at         | 0.060071621  | 3.650217059 | 0.857505993  | 0.412484828 | 0.412484828 | -5.29113013  |
| 1449333_at         | -0.085256126 | 9.316033547 | -0.857467052 | 0.41250528  | 0.41250528  | -5.291159792 |
| 1456165_at         | 0.074613979  | 3.26180107  | 0.857434883  | 0.412522176 | 0.412522176 | -5.291184296 |
| 1424483_at         | 0.06081593   | 9.399408726 | 0.857394178  | 0.412543556 | 0.412543556 | -5.2912153   |
| 1426583_at         | 0.06556645   | 10.2149086  | 0.857365379  | 0.412558684 | 0.412558684 | -5.291237236 |
| 1419329_at         | -0.113193805 | 8.19335448  | -0.857346129 | 0.412568795 | 0.412568795 | -5.291251897 |
| 1453572_a_at       | 0.059253749  | 10.85365299 | 0.857323279  | 0.412580798 | 0.412580798 | -5.2912693   |
| 1453234_at         | -0.061867945 | 3.613546945 | -0.857312683 | 0.412586364 | 0.412586364 | -5.291277371 |
| 1431302_a_at       | 0.075358989  | 7.101409449 | 0.857292838  | 0.412596788 | 0.412596788 | -5.291292485 |
| 1418135_at         | 0.090639016  | 7.345539199 | 0.857162133  | 0.412665453 | 0.412665453 | -5.291392024 |
| 1419196_at         | -0.072095445 | 3.764924568 | -0.857118215 | 0.412688526 | 0.412688526 | -5.291425466 |
| 1446799_at         | 0.086917661  | 5.652618776 | 0.857098435  | 0.412698919 | 0.412698919 | -5.291440528 |
| AFFX-b-ActinMur/M: | 0.062985881  | 13.5585109  | 0.857069664  | 0.412714035 | 0.412714035 | -5.291462436 |
| 1453872_at         | -0.078395368 | 3.784604264 | -0.856996689 | 0.412752378 | 0.412752378 | -5.291518    |
| 1460697_s_at       | 0.059371221  | 10.76345254 | 0.856984799  | 0.412758625 | 0.412758625 | -5.291527052 |
| 1423076_at         | 0.056412771  | 8.490798316 | 0.856933151  | 0.412785765 | 0.412785765 | -5.291566375 |
| 1419799_at         | 0.058848052  | 3.569178215 | 0.856932002  | 0.412786368 | 0.412786368 | -5.29156725  |
| 1444978_at         | -0.065221984 | 3.557360089 | -0.856898191 | 0.412804136 | 0.412804136 | -5.291592991 |
| 1422535_at         | -0.091141817 | 7.682388894 | -0.85671914  | 0.412898232 | 0.412898232 | -5.291729291 |

|              |              |             |              |             |             |              |
|--------------|--------------|-------------|--------------|-------------|-------------|--------------|
| 1444308_at   | 0.112628422  | 4.63049245  | 0.856696177  | 0.412910301 | 0.412910301 | -5.29174677  |
| 1430210_at   | -0.058350529 | 3.832560535 | -0.856646642 | 0.412936336 | 0.412936336 | -5.291784473 |
| 1457751_at   | 0.103542978  | 8.075859401 | 0.856621386  | 0.412949611 | 0.412949611 | -5.291803695 |
| 1436895_at   | 0.134284181  | 4.931409085 | 0.856596299  | 0.412962798 | 0.412962798 | -5.291822789 |
| 1451767_at   | 0.0793569    | 5.551342469 | 0.856581581  | 0.412970533 | 0.412970533 | -5.29183399  |
| 1435441_at   | 0.083709901  | 5.826271832 | 0.856555619  | 0.41298418  | 0.41298418  | -5.291853749 |
| 1433038_at   | -0.054381434 | 4.482632005 | -0.856545595 | 0.41298945  | 0.41298945  | -5.291861378 |
| 1459321_at   | 0.093516586  | 5.439459704 | 0.856496706  | 0.413015148 | 0.413015148 | -5.291898584 |
| 1445947_at   | 0.064953956  | 6.128764372 | 0.856471901  | 0.413028188 | 0.413028188 | -5.29191746  |
| 1434687_at   | -0.121757957 | 4.460399054 | -0.856389141 | 0.413071695 | 0.413071695 | -5.291980438 |
| 1454600_at   | 0.094690766  | 3.811766385 | 0.856303383  | 0.413116782 | 0.413116782 | -5.292045691 |
| 1443916_at   | 0.056687525  | 4.780812334 | 0.856268755  | 0.413134989 | 0.413134989 | -5.292072038 |
| 1441544_at   | 0.094812022  | 6.833461706 | 0.856180475  | 0.413181406 | 0.413181406 | -5.292139202 |
| 1439009_at   | -0.055432827 | 8.435689136 | -0.856157654 | 0.413193406 | 0.413193406 | -5.292156563 |
| 1438607_at   | -0.06112801  | 3.884801958 | -0.856064162 | 0.413242569 | 0.413242569 | -5.292227685 |
| 1441266_at   | 0.064477877  | 9.343694658 | 0.856017582  | 0.413267065 | 0.413267065 | -5.292263116 |
| 1439694_at   | -0.068332177 | 3.662160441 | -0.855776996 | 0.413393602 | 0.413393602 | -5.292446097 |
| 1431964_at   | -0.088501701 | 4.454971819 | -0.855766756 | 0.413398988 | 0.413398988 | -5.292453884 |
| 1446915_at   | 0.202100305  | 6.148480308 | 0.855701482  | 0.413433324 | 0.413433324 | -5.292503522 |
| 1442057_at   | -0.127495868 | 5.768077815 | -0.855698981 | 0.413434639 | 0.413434639 | -5.292505424 |
| 1450522_a_at | 0.067958745  | 10.81142289 | 0.855691653  | 0.413438494 | 0.413438494 | -5.292510996 |
| 1458375_at   | 0.083565409  | 5.694586138 | 0.855625901  | 0.413473084 | 0.413473084 | -5.292560993 |
| 1434517_at   | -0.053505752 | 8.047176884 | -0.85561533  | 0.413478645 | 0.413478645 | -5.292569031 |
| 1454836_at   | 0.090642705  | 8.748612883 | 0.855591129  | 0.413491377 | 0.413491377 | -5.292587432 |
| 1444728_at   | 0.101075268  | 8.190603151 | 0.855574598  | 0.413500074 | 0.413500074 | -5.2926      |
| 1424659_at   | 0.087721498  | 10.04095461 | 0.855446896  | 0.413567262 | 0.413567262 | -5.292697089 |
| 1427270_a_at | 0.090432859  | 8.047229655 | 0.855380891  | 0.413601992 | 0.413601992 | -5.292747267 |
| 1445809_at   | -0.110017148 | 5.214575816 | -0.855378008 | 0.413603509 | 0.413603509 | -5.292749458 |
| 1440271_at   | -0.074537897 | 4.747652953 | -0.855308506 | 0.413640082 | 0.413640082 | -5.292802291 |
| 1416157_at   | 0.090757905  | 7.416791687 | 0.855270196  | 0.413660242 | 0.413660242 | -5.292831411 |
| 1422726_x_at | -0.069675412 | 3.277248809 | -0.855182816 | 0.413706226 | 0.413706226 | -5.292897825 |
| 1416470_a_at | -0.061260384 | 11.38587787 | -0.855160922 | 0.413717749 | 0.413717749 | -5.292914465 |
| 1426701_at   | -0.08681023  | 7.717848571 | -0.855112408 | 0.413743282 | 0.413743282 | -5.292951336 |
| 1428080_at   | 0.053408919  | 9.088594453 | 0.855107908  | 0.41374565  | 0.41374565  | -5.292954756 |
| 1425838_at   | -0.095862592 | 4.356406192 | -0.855092051 | 0.413753996 | 0.413753996 | -5.292966806 |
| 1441747_at   | -0.089054485 | 5.376672232 | -0.855043032 | 0.413779797 | 0.413779797 | -5.293004058 |
| 1428381_a_at | 0.059357695  | 10.4967851  | 0.855023954  | 0.413789838 | 0.413789838 | -5.293018556 |
| 1439963_x_at | -0.161587812 | 6.171547442 | -0.854963868 | 0.413821466 | 0.413821466 | -5.293064215 |
| 1420609_at   | 0.091600339  | 10.93985743 | 0.854957868  | 0.413824624 | 0.413824624 | -5.293068774 |
| 1456722_at   | 0.052684664  | 7.043413694 | 0.85488649   | 0.413862198 | 0.413862198 | -5.29312301  |
| 1437701_at   | -0.149695319 | 4.826878793 | -0.854819738 | 0.413897338 | 0.413897338 | -5.293173727 |
| 1437590_at   | -0.062351074 | 4.402913994 | -0.854798069 | 0.413908746 | 0.413908746 | -5.293190191 |
| 1449817_at   | -0.067585951 | 3.994722236 | -0.854737569 | 0.413940597 | 0.413940597 | -5.293236154 |
| 1453001_at   | -0.064740288 | 8.916724488 | -0.854676198 | 0.413972909 | 0.413972909 | -5.293282776 |
| 1453430_at   | 0.060796434  | 7.413275743 | 0.854647594  | 0.41398797  | 0.41398797  | -5.293304505 |
| 1446650_at   | -0.08879875  | 5.22486212  | -0.854628944 | 0.41399779  | 0.41399779  | -5.293318672 |
| 1431777_a_at | 0.070600116  | 10.09144342 | 0.854529218  | 0.414050301 | 0.414050301 | -5.293394422 |
| 1452104_at   | -0.086041646 | 4.384259636 | -0.854524551 | 0.414052759 | 0.414052759 | -5.293397967 |
| 1453687_at   | -0.105413154 | 4.892892215 | -0.854508098 | 0.414061423 | 0.414061423 | -5.293410464 |
| 1425480_at   | 0.064563962  | 10.27360599 | 0.854485942  | 0.41407309  | 0.41407309  | -5.293427291 |
| 1445504_at   | 0.055307443  | 6.483418404 | 0.854485586  | 0.414073278 | 0.414073278 | -5.293427562 |
| 1458888_at   | -0.082877783 | 3.780110097 | -0.854428072 | 0.414103566 | 0.414103566 | -5.293471244 |
| 1418852_at   | -0.284289015 | 6.856996823 | -0.85422991  | 0.414207933 | 0.414207933 | -5.293621727 |



|              |              |             |              |             |             |              |
|--------------|--------------|-------------|--------------|-------------|-------------|--------------|
| 1427371_at   | -0.114486107 | 7.513387113 | -0.85420691  | 0.414220048 | 0.414220048 | -5.293639192 |
| 1439624_at   | -0.062990785 | 3.63118377  | -0.854197287 | 0.414225116 | 0.414225116 | -5.293646498 |
| 1451650_at   | -0.088797872 | 4.234235412 | -0.85418986  | 0.414229029 | 0.414229029 | -5.293652138 |
| 1421620_at   | 0.067245079  | 3.560446459 | 0.854061287  | 0.414296757 | 0.414296757 | -5.293749756 |
| 1455020_at   | -0.062869876 | 7.933571682 | -0.853914666 | 0.414374002 | 0.414374002 | -5.293861063 |
| 1445191_at   | -0.085545736 | 4.61998554  | -0.853898035 | 0.414382764 | 0.414382764 | -5.293873687 |
| 1448886_at   | -0.208468503 | 4.359822035 | -0.853894664 | 0.41438454  | 0.41438454  | -5.293876246 |
| 1439709_at   | 0.057743138  | 3.596125406 | 0.853755351  | 0.414457946 | 0.414457946 | -5.293981988 |
| 1441938_x_at | -0.084098628 | 3.353275858 | -0.853707486 | 0.414483168 | 0.414483168 | -5.294018315 |
| 1451427_a_at | -0.070083839 | 8.230346326 | -0.853689397 | 0.414492701 | 0.414492701 | -5.294032044 |
| 1437927_at   | 0.156036916  | 5.463208736 | 0.853653691  | 0.414511517 | 0.414511517 | -5.294059141 |
| 1423345_at   | -0.064751652 | 9.516657464 | -0.853649556 | 0.414513696 | 0.414513696 | -5.294062279 |
| 1429572_at   | -0.080540223 | 4.533070719 | -0.853640461 | 0.414518489 | 0.414518489 | -5.294069181 |
| 1419217_at   | -0.069517372 | 6.630095921 | -0.85355834  | 0.414561768 | 0.414561768 | -5.294131499 |
| 1451871_a_at | 0.078687545  | 7.902620396 | 0.853557004  | 0.414562472 | 0.414562472 | -5.294132513 |
| 1427795_s_at | 0.057844839  | 3.802153535 | 0.853549883  | 0.414566225 | 0.414566225 | -5.294137916 |
| 1422711_a_at | -0.056150017 | 6.569785528 | -0.853533082 | 0.41457508  | 0.41457508  | -5.294150665 |
| 1447323_at   | -0.09115878  | 4.178091604 | -0.853462849 | 0.414612097 | 0.414612097 | -5.294203957 |
| 1428618_at   | -0.067237402 | 8.316228981 | -0.853447755 | 0.414620053 | 0.414620053 | -5.294215409 |
| 1420530_at   | 0.085050761  | 6.805454115 | 0.853443332  | 0.414622384 | 0.414622384 | -5.294218765 |
| 1423686_a_at | 0.053214108  | 9.012428734 | 0.853417333  | 0.414636088 | 0.414636088 | -5.294238491 |
| 1452346_at   | 0.057829405  | 8.517078359 | 0.85339586   | 0.414647406 | 0.414647406 | -5.294254784 |
| 1428776_at   | 0.081484536  | 5.797169331 | 0.85333993   | 0.414676888 | 0.414676888 | -5.294297216 |
| 1427572_at   | 0.071774978  | 4.421322787 | 0.853312614  | 0.414691287 | 0.414691287 | -5.29431794  |
| 1424292_at   | 0.121109767  | 7.778734739 | 0.85320859   | 0.414746125 | 0.414746125 | -5.294396852 |
| 1421967_at   | 0.103650726  | 3.92525973  | 0.853042077  | 0.414833917 | 0.414833917 | -5.294523154 |
| 1447992_s_at | 0.069771398  | 3.418423131 | 0.852914324  | 0.414901281 | 0.414901281 | -5.29462004  |
| 1433567_at   | -0.056819571 | 10.06605    | -0.852833133 | 0.414944096 | 0.414944096 | -5.294681608 |
| 1442645_at   | -0.078478205 | 4.662967733 | -0.85282336  | 0.414949251 | 0.414949251 | -5.294689019 |
| 1447463_at   | 0.058825628  | 3.13517627  | 0.852637111  | 0.415047481 | 0.415047481 | -5.294830235 |
| 1460373_a_at | -0.087801234 | 6.276891108 | -0.852579274 | 0.415077989 | 0.415077989 | -5.294874083 |
| 1453856_at   | -0.097536884 | 4.131512994 | -0.852538567 | 0.415099461 | 0.415099461 | -5.294904942 |
| 1431903_at   | -0.065840146 | 3.642913495 | -0.852511883 | 0.415113537 | 0.415113537 | -5.294925169 |
| 1432714_at   | 0.076996203  | 3.333415158 | 0.852500341  | 0.415119626 | 0.415119626 | -5.294933919 |
| 1460099_at   | 0.113946233  | 6.283860648 | 0.852472953  | 0.415134074 | 0.415134074 | -5.294954679 |
| 1425205_at   | -0.064142878 | 5.760299263 | -0.852437167 | 0.415152952 | 0.415152952 | -5.294981805 |
| 1453810_at   | -0.057103894 | 5.507103402 | -0.852336675 | 0.415205969 | 0.415205969 | -5.295057974 |
| 1429049_at   | 0.071785889  | 5.789313076 | 0.852315613  | 0.415217082 | 0.415217082 | -5.295073937 |
| 1457473_at   | 0.075746681  | 7.234661991 | 0.852280918  | 0.415235387 | 0.415235387 | -5.295100231 |
| 1442897_at   | 0.090511147  | 6.491822729 | 0.852270602  | 0.41524083  | 0.41524083  | -5.29510805  |
| 1423102_a_at | 0.112895886  | 9.781320794 | 0.852268784  | 0.415241789 | 0.415241789 | -5.295109427 |
| 1441615_at   | -0.073107609 | 7.244239757 | -0.852260393 | 0.415246217 | 0.415246217 | -5.295115787 |
| 1430202_at   | 0.104256066  | 3.874641963 | 0.852221287  | 0.41526685  | 0.41526685  | -5.295145423 |
| 1431264_at   | 0.100974891  | 3.698198428 | 0.852181225  | 0.41528799  | 0.41528799  | -5.295175782 |
| 1430665_at   | 0.07832804   | 6.889343665 | 0.852129797  | 0.415315127 | 0.415315127 | -5.295214754 |
| 1448045_at   | -0.068150946 | 3.911976973 | -0.852110903 | 0.415325098 | 0.415325098 | -5.295229071 |
| 1437150_at   | 0.095322347  | 7.040693616 | 0.852044469  | 0.415360156 | 0.415360156 | -5.295279409 |
| 1439155_at   | -0.055610863 | 8.1339987   | -0.851997665 | 0.415384856 | 0.415384856 | -5.295314872 |
| 1447702_x_at | -0.056547563 | 3.295387451 | -0.851997348 | 0.415385023 | 0.415385023 | -5.295315112 |
| 1429800_at   | -0.060929806 | 7.555344565 | -0.851945183 | 0.415412555 | 0.415412555 | -5.295354635 |
| 1423582_at   | -0.075736412 | 4.509893055 | -0.85194356  | 0.415413411 | 0.415413411 | -5.295355864 |
| 1457828_at   | 0.082519811  | 5.336808573 | 0.851943001  | 0.415413706 | 0.415413706 | -5.295356287 |
| 1417270_at   | 0.137080502  | 6.321798746 | 0.851907982  | 0.415432189 | 0.415432189 | -5.295382818 |

|              |              |             |              |             |             |              |
|--------------|--------------|-------------|--------------|-------------|-------------|--------------|
| 1427464_s_at | -0.076739715 | 11.55302516 | -0.85187931  | 0.415447322 | 0.415447322 | -5.29540454  |
| 1426049_a_at | 0.054931092  | 7.601660299 | 0.851841934  | 0.415467049 | 0.415467049 | -5.295432854 |
| 1448477_at   | -0.055985605 | 7.069372679 | -0.851806942 | 0.41548552  | 0.41548552  | -5.295459362 |
| 1431303_at   | -0.070236424 | 6.252689645 | -0.851796461 | 0.415491052 | 0.415491052 | -5.295467302 |
| 1418456_a_at | 0.119492737  | 6.581221963 | 0.85172858   | 0.415526884 | 0.415526884 | -5.295518721 |
| 1430873_at   | 0.060783987  | 4.747963201 | 0.851719444  | 0.415531706 | 0.415531706 | -5.295525641 |
| 1422573_at   | 0.111211234  | 5.777897239 | 0.851694865  | 0.415544681 | 0.415544681 | -5.295544258 |
| 1459997_s_at | -0.088081506 | 6.710895092 | -0.851656741 | 0.415564807 | 0.415564807 | -5.295573134 |
| 1428725_at   | -0.062540119 | 8.641150443 | -0.851610822 | 0.415589048 | 0.415589048 | -5.295607913 |
| 1436455_at   | 0.065660689  | 3.910047744 | 0.851605732  | 0.415591736 | 0.415591736 | -5.295611768 |
| 1420271_at   | 0.063208973  | 3.247118369 | 0.851434774  | 0.415681997 | 0.415681997 | -5.295741236 |
| 1453442_at   | -0.114256995 | 4.857963241 | -0.851422631 | 0.415688409 | 0.415688409 | -5.295750431 |
| 1425722_at   | 0.065294352  | 3.539708181 | 0.851393784  | 0.41570364  | 0.41570364  | -5.295772274 |
| 1415956_a_at | -0.095339124 | 9.006356149 | -0.851352327 | 0.415725532 | 0.415725532 | -5.295803666 |
| 1437090_at   | -0.059287079 | 4.548687941 | -0.85124887  | 0.415780164 | 0.415780164 | -5.295881997 |
| 1418161_at   | 0.078090746  | 5.67790519  | 0.85124452   | 0.415782462 | 0.415782462 | -5.295885291 |
| 1429677_at   | -0.056253242 | 4.15207521  | -0.851201583 | 0.415805137 | 0.415805137 | -5.295917798 |
| 1444304_at   | -0.076096499 | 5.236894921 | -0.851162019 | 0.415826032 | 0.415826032 | -5.29594775  |
| 1430507_at   | -0.054921285 | 4.249910158 | -0.851107967 | 0.41585458  | 0.41585458  | -5.295988668 |
| 1449694_s_at | -0.081343099 | 6.184186667 | -0.851105547 | 0.415855858 | 0.415855858 | -5.2959905   |
| 1434561_at   | 0.060734926  | 9.159586287 | 0.851056518  | 0.415881754 | 0.415881754 | -5.296027614 |
| 1449627_at   | 0.060643351  | 4.017410546 | 0.851044662  | 0.415888016 | 0.415888016 | -5.296036589 |
| 1446304_at   | 0.070443522  | 5.678706418 | 0.851028491  | 0.415896557 | 0.415896557 | -5.296048829 |
| 1453298_at   | -0.073703265 | 4.859720693 | -0.851014739 | 0.415903821 | 0.415903821 | -5.296059239 |
| 1444096_at   | 0.068736013  | 8.185930671 | 0.850975233  | 0.415924689 | 0.415924689 | -5.296089142 |
| 1447624_s_at | -0.067445089 | 11.25369596 | -0.850934844 | 0.415946024 | 0.415946024 | -5.296119712 |
| 1443763_at   | -0.059855208 | 4.490137698 | -0.850932739 | 0.415947136 | 0.415947136 | -5.296121304 |
| 1455914_at   | -0.081506581 | 6.536420013 | -0.850911452 | 0.415958381 | 0.415958381 | -5.296137416 |
| 1424370_s_at | 0.065010094  | 7.727791533 | 0.850896899  | 0.415966068 | 0.415966068 | -5.29614843  |
| 1455865_at   | 0.071810303  | 3.291654591 | 0.850875874  | 0.415977175 | 0.415977175 | -5.296164343 |
| 1446775_at   | -0.054165232 | 6.030432931 | -0.850809807 | 0.416012078 | 0.416012078 | -5.296214343 |
| 1416064_a_at | -0.059443075 | 12.8100678  | -0.850724469 | 0.416057163 | 0.416057163 | -5.296278922 |
| 1434171_at   | -0.065137426 | 3.77132742  | -0.850488405 | 0.416181899 | 0.416181899 | -5.296457534 |
| 1458158_at   | 0.077848084  | 5.51553186  | 0.850487459  | 0.416182399 | 0.416182399 | -5.29645825  |
| 1419021_at   | -0.076965654 | 3.663991436 | -0.850429446 | 0.416213056 | 0.416213056 | -5.296502138 |
| 1424498_at   | -0.070644382 | 3.997528875 | -0.850354438 | 0.416252698 | 0.416252698 | -5.296558879 |
| 1418084_at   | -0.057016847 | 9.706236955 | -0.850308414 | 0.416277023 | 0.416277023 | -5.296593693 |
| 1445436_at   | 0.094036543  | 6.051738701 | 0.850281559  | 0.416291216 | 0.416291216 | -5.296614005 |
| 1450288_at   | 0.11343779   | 6.755328986 | 0.850257833  | 0.416303757 | 0.416303757 | -5.296631951 |
| 1425823_at   | -0.070362913 | 3.424307767 | -0.850256427 | 0.4163045   | 0.4163045   | -5.296633014 |
| 1455535_at   | -0.084461748 | 5.696407004 | -0.85023359  | 0.416316571 | 0.416316571 | -5.296650288 |
| 1426869_at   | 0.089786303  | 8.221324394 | 0.850230422  | 0.416318245 | 0.416318245 | -5.296652683 |
| 1417712_at   | 0.052903513  | 11.9968766  | 0.850222274  | 0.416322552 | 0.416322552 | -5.296658846 |
| 1455356_at   | 0.061235746  | 8.877887387 | 0.850198117  | 0.416335321 | 0.416335321 | -5.296677117 |
| 1435907_at   | 0.113603551  | 5.488217731 | 0.850094636  | 0.416390022 | 0.416390022 | -5.296755378 |
| 1459069_at   | -0.073241039 | 6.728556494 | -0.850028325 | 0.416425077 | 0.416425077 | -5.296805524 |
| 1441279_at   | -0.079299844 | 3.465614727 | -0.849988316 | 0.416446228 | 0.416446228 | -5.296835777 |
| 1444955_at   | -0.067560491 | 4.295949283 | -0.849984172 | 0.416448419 | 0.416448419 | -5.296838911 |
| 1448137_at   | -0.074455795 | 4.719827765 | -0.849971944 | 0.416454884 | 0.416454884 | -5.296848157 |
| 1453597_at   | -0.091548902 | 3.842775903 | -0.849895636 | 0.416495229 | 0.416495229 | -5.296905856 |
| 1450132_at   | -0.060108982 | 4.495367265 | -0.849892595 | 0.416496836 | 0.416496836 | -5.296908155 |
| 1429062_at   | 0.07487679   | 6.288032449 | 0.849881167  | 0.416502879 | 0.416502879 | -5.296916796 |
| 1457816_at   | -0.061474068 | 6.831038893 | -0.849875659 | 0.416505791 | 0.416505791 | -5.29692096  |

|              |              |             |              |             |             |              |
|--------------|--------------|-------------|--------------|-------------|-------------|--------------|
| 1450890_a_at | 0.073345688  | 9.295770198 | 0.849851078  | 0.416518788 | 0.416518788 | -5.296939545 |
| 1436458_at   | -0.114146154 | 7.95530616  | -0.849842587 | 0.416523278 | 0.416523278 | -5.296945965 |
| 1430315_at   | 0.077825737  | 3.783046728 | 0.849836931  | 0.416526268 | 0.416526268 | -5.296950241 |
| 1440660_at   | -0.072939919 | 6.815010157 | -0.84975961  | 0.416567153 | 0.416567153 | -5.297008698 |
| 1432435_s_at | 0.057939308  | 7.848296827 | 0.849758627  | 0.416567673 | 0.416567673 | -5.297009441 |
| 1439308_at   | -0.060815659 | 7.609530323 | -0.849682907 | 0.416607714 | 0.416607714 | -5.297066682 |
| 1452981_at   | 0.179705554  | 6.826534098 | 0.849679638  | 0.416609443 | 0.416609443 | -5.297069154 |
| 1455406_at   | 0.079006144  | 6.843387608 | 0.849656794  | 0.416621523 | 0.416621523 | -5.297086422 |
| 1432052_at   | -0.110674474 | 5.076293398 | -0.849646759 | 0.41662683  | 0.41662683  | -5.297094008 |
| 1454457_at   | -0.061851055 | 5.167137672 | -0.849570384 | 0.416667221 | 0.416667221 | -5.297151738 |
| 1457366_at   | 0.107519318  | 7.43546191  | 0.849558209  | 0.416673661 | 0.416673661 | -5.297160941 |
| 1449208_at   | -0.096697203 | 4.168832264 | -0.849493299 | 0.416707991 | 0.416707991 | -5.297210001 |
| 1426462_at   | -0.05154186  | 7.955090149 | -0.849427527 | 0.416742779 | 0.416742779 | -5.29725971  |
| 1450709_at   | 0.080535908  | 3.389818761 | 0.849425144  | 0.41674404  | 0.41674404  | -5.297261511 |
| 1458783_at   | 0.068463362  | 3.61289043  | 0.849374917  | 0.416770608 | 0.416770608 | -5.297299469 |
| 1427617_at   | 0.058280411  | 4.896877996 | 0.849278644  | 0.416821535 | 0.416821535 | -5.297372219 |
| 1418058_at   | -0.082686379 | 5.753542326 | -0.849267706 | 0.416827321 | 0.416827321 | -5.297380484 |
| 1423247_at   | -0.060119393 | 9.552038463 | -0.849262784 | 0.416829925 | 0.416829925 | -5.297384204 |
| 1417255_at   | -0.0665865   | 8.645183545 | -0.84923499  | 0.416844628 | 0.416844628 | -5.297405205 |
| 1434154_at   | 0.056830895  | 6.966798556 | 0.849157592  | 0.416885575 | 0.416885575 | -5.297463685 |
| 1422000_at   | 0.059827151  | 4.18427068  | 0.849149106  | 0.416890065 | 0.416890065 | -5.297470097 |
| 1435230_at   | 0.095586012  | 7.315160607 | 0.849132121  | 0.416899052 | 0.416899052 | -5.29748293  |
| 1448521_at   | 0.062091651  | 8.996187134 | 0.849125982  | 0.416902299 | 0.416902299 | -5.297487568 |
| 1418576_at   | -0.063269783 | 10.70002227 | -0.849057333 | 0.416938621 | 0.416938621 | -5.297539432 |
| 1421964_at   | -0.117871838 | 6.844385829 | -0.8490267   | 0.41695483  | 0.41695483  | -5.297562574 |
| 1439977_at   | -0.095147441 | 3.842276854 | -0.848986855 | 0.416975913 | 0.416975913 | -5.297592674 |
| 1418994_at   | -0.058523303 | 4.219573439 | -0.848867578 | 0.417039031 | 0.417039031 | -5.297682773 |
| 1431407_at   | -0.069380789 | 3.390031394 | -0.848860802 | 0.417042617 | 0.417042617 | -5.297687891 |
| 1438707_at   | 0.066424091  | 3.588001976 | 0.848799817  | 0.417074891 | 0.417074891 | -5.297733953 |
| 1420089_at   | 0.066409627  | 6.853158721 | 0.848797263  | 0.417076243 | 0.417076243 | -5.297735882 |
| 1430966_at   | 0.07431583   | 3.35238117  | 0.848714214  | 0.417120197 | 0.417120197 | -5.297798605 |
| 1427161_at   | -0.067360181 | 9.232557176 | -0.848679343 | 0.417138653 | 0.417138653 | -5.297824939 |
| 1454581_at   | -0.08852567  | 4.773416114 | -0.848671651 | 0.417142724 | 0.417142724 | -5.297830748 |
| 1430875_a_at | 0.063318852  | 8.38191642  | 0.848655174  | 0.417151445 | 0.417151445 | -5.297843191 |
| 1454755_at   | 0.067430774  | 7.58555843  | 0.848599039  | 0.417181158 | 0.417181158 | -5.297885582 |
| 1438893_at   | -0.167250395 | 5.661866224 | -0.848595792 | 0.417182877 | 0.417182877 | -5.297888034 |
| 1456447_at   | 0.059303428  | 5.876500158 | 0.84843896   | 0.417265897 | 0.417265897 | -5.298006452 |
| 1451058_at   | -0.063760433 | 8.780405484 | -0.848435057 | 0.417267963 | 0.417267963 | -5.298009399 |
| 1424336_at   | -0.153159074 | 5.473681785 | -0.848410286 | 0.417281077 | 0.417281077 | -5.298028101 |
| 1428536_at   | 0.086502129  | 4.410549984 | 0.848268681  | 0.417356049 | 0.417356049 | -5.298135004 |
| 1446944_at   | 0.073898964  | 3.327981001 | 0.848267981  | 0.417356419 | 0.417356419 | -5.298135532 |
| 1439338_at   | -0.071244915 | 3.531703233 | -0.848111628 | 0.41743921  | 0.41743921  | -5.298253552 |
| 1452103_at   | 0.058037161  | 7.799831588 | 0.848035457  | 0.417479548 | 0.417479548 | -5.298311041 |
| 1434444_s_at | 0.055584488  | 10.09693812 | 0.847990523  | 0.417503345 | 0.417503345 | -5.298344952 |
| 1428966_at   | 0.074905567  | 9.589048753 | 0.847833425  | 0.41758655  | 0.41758655  | -5.2984635   |
| 1438110_at   | 0.115480035  | 6.942924273 | 0.847792941  | 0.417607994 | 0.417607994 | -5.298494047 |
| 1418525_at   | 0.092201973  | 7.459681822 | 0.847789177  | 0.417609988 | 0.417609988 | -5.298496888 |
| 1436362_x_at | 0.104496852  | 8.283093819 | 0.847768346  | 0.417621022 | 0.417621022 | -5.298512605 |
| 1441093_at   | -0.070443398 | 4.031744003 | -0.847752132 | 0.41762961  | 0.41762961  | -5.298524838 |
| 1418699_s_at | 0.057823553  | 9.62393648  | 0.847747792  | 0.417631909 | 0.417631909 | -5.298528112 |
| 1426766_at   | 0.106061323  | 10.74725782 | 0.847740057  | 0.417636007 | 0.417636007 | -5.298533949 |
| 1448982_at   | -0.062750794 | 4.215780991 | -0.847728876 | 0.417641929 | 0.417641929 | -5.298542384 |
| 1438519_at   | 0.10785447   | 7.11824134  | 0.847640423  | 0.417688787 | 0.417688787 | -5.298609117 |

|              |              |             |              |             |             |              |
|--------------|--------------|-------------|--------------|-------------|-------------|--------------|
| 1425519_a_at | 0.118071758  | 6.78335385  | 0.847637656  | 0.417690253 | 0.417690253 | -5.298611205 |
| 1422375_a_at | -0.082160408 | 6.080696332 | -0.847603529 | 0.417708332 | 0.417708332 | -5.298636951 |
| 1434209_at   | 0.08577007   | 6.839711814 | 0.847559024  | 0.417731911 | 0.417731911 | -5.298670524 |
| 1459701_x_at | -0.084514759 | 3.831581316 | -0.847463882 | 0.417782319 | 0.417782319 | -5.298742291 |
| 1454822_x_at | 0.172760915  | 9.742455807 | 0.847397018  | 0.417817748 | 0.417817748 | -5.298792724 |
| 1429996_at   | 0.059846159  | 7.676419134 | 0.847260598  | 0.417890038 | 0.417890038 | -5.298895609 |
| 1449199_at   | -0.11639336  | 6.205245837 | -0.847256295 | 0.417892318 | 0.417892318 | -5.298898854 |
| 1451474_a_at | 0.069401377  | 7.79201287  | 0.847202395  | 0.417920883 | 0.417920883 | -5.2989395   |
| 1416591_at   | 0.059909173  | 10.41295674 | 0.847187601  | 0.417928723 | 0.417928723 | -5.298950657 |
| 1431887_at   | 0.058142178  | 3.666748052 | 0.847152104  | 0.417947536 | 0.417947536 | -5.298977423 |
| 1439512_at   | -0.077315711 | 3.777945392 | -0.847150109 | 0.417948593 | 0.417948593 | -5.298978928 |
| 1422799_at   | -0.142307216 | 10.03400081 | -0.847148943 | 0.417949211 | 0.417949211 | -5.298979807 |
| 1453503_at   | 0.077892776  | 4.194771096 | 0.847096491  | 0.417977011 | 0.417977011 | -5.299019357 |
| 1456507_at   | 0.072263277  | 7.31083262  | 0.846982036  | 0.418037677 | 0.418037677 | -5.299105652 |
| 1450870_at   | 0.10718171   | 8.280333586 | 0.846975936  | 0.41804091  | 0.41804091  | -5.299110251 |
| 1428169_at   | 0.060547375  | 7.611181845 | 0.846942079  | 0.418058857 | 0.418058857 | -5.299135776 |
| 1433798_a_at | -0.067818878 | 4.126866385 | -0.846933584 | 0.418063361 | 0.418063361 | -5.299142181 |
| 1430233_a_at | -0.066496477 | 3.290920726 | -0.846834096 | 0.4181161   | 0.4181161   | -5.299217179 |
| 1458400_at   | 0.106548337  | 6.797691778 | 0.846832014  | 0.418117204 | 0.418117204 | -5.299218749 |
| 1430660_at   | 0.098538427  | 4.018479453 | 0.846778428  | 0.418145612 | 0.418145612 | -5.299259141 |
| 1459556_at   | -0.088953601 | 3.862253045 | -0.84677312  | 0.418148427 | 0.418148427 | -5.299263142 |
| 1420907_at   | 0.070506399  | 8.881214228 | 0.846722083  | 0.418175486 | 0.418175486 | -5.299301612 |
| 1450171_x_at | -0.073810434 | 3.196096528 | -0.846652293 | 0.418212489 | 0.418212489 | -5.299354212 |
| 1415908_at   | 0.126757448  | 9.009119144 | 0.846641466  | 0.418218229 | 0.418218229 | -5.299362372 |
| 1450445_at   | -0.152748568 | 4.846769453 | -0.84663781  | 0.418220168 | 0.418220168 | -5.299365127 |
| 1431476_at   | -0.082482686 | 4.10912918  | -0.846605894 | 0.418237091 | 0.418237091 | -5.299389181 |
| 1451296_x_at | -0.074129406 | 10.58332526 | -0.846601743 | 0.418239292 | 0.418239292 | -5.299392309 |
| 1432843_at   | -0.07203673  | 6.487929374 | -0.846556193 | 0.418263445 | 0.418263445 | -5.299426637 |
| 1421196_at   | 0.09226658   | 5.424919034 | 0.846430752  | 0.418329965 | 0.418329965 | -5.299521164 |
| 1444839_at   | -0.077627156 | 3.164573852 | -0.846386619 | 0.41835337  | 0.41835337  | -5.299554417 |
| 1431100_at   | -0.062794962 | 4.421952927 | -0.84621497  | 0.41844441  | 0.41844441  | -5.29968374  |
| 1416927_at   | 0.072832229  | 6.278061176 | 0.846060254  | 0.41852648  | 0.41852648  | -5.299800286 |
| 1444548_at   | -0.091072068 | 3.693324521 | -0.846005993 | 0.418555266 | 0.418555266 | -5.299841156 |
| 1437546_at   | 0.064565989  | 8.576038269 | 0.845881976  | 0.418621064 | 0.418621064 | -5.29993456  |
| 1455450_at   | 0.067588308  | 7.512342089 | 0.845708942  | 0.418712878 | 0.418712878 | -5.30006486  |
| 1432137_at   | 0.078389937  | 3.391775375 | 0.84557627   | 0.418783285 | 0.418783285 | -5.300164752 |
| 1451721_a_at | 0.088511808  | 4.896826959 | 0.845487288  | 0.418830511 | 0.418830511 | -5.300231741 |
| 1445265_at   | 0.354239348  | 4.559865718 | 0.84546681   | 0.41884138  | 0.41884138  | -5.300247157 |
| 1420737_at   | -0.066472884 | 4.93984831  | -0.845228734 | 0.418967757 | 0.418967757 | -5.300426357 |
| 1425699_a_at | -0.067488972 | 8.677310124 | -0.845175124 | 0.418996218 | 0.418996218 | -5.300466703 |
| 1433000_at   | 0.065863193  | 4.846770303 | 0.84512624   | 0.419022171 | 0.419022171 | -5.300503491 |
| 1450133_at   | -0.0648888   | 3.425364964 | -0.845089856 | 0.419041488 | 0.419041488 | -5.300530871 |
| 1444047_at   | -0.068114012 | 3.43282486  | -0.845065979 | 0.419054165 | 0.419054165 | -5.300548838 |
| 1438374_x_at | -0.056536466 | 3.655597892 | -0.845051023 | 0.419062106 | 0.419062106 | -5.300560092 |
| 1442868_at   | -0.058295911 | 5.303477103 | -0.845018807 | 0.419079212 | 0.419079212 | -5.300584333 |
| 1440513_at   | 0.131370271  | 7.139111922 | 0.845016964  | 0.419080191 | 0.419080191 | -5.30058572  |
| 1449604_at   | -0.078432384 | 4.151055202 | -0.845008917 | 0.419084464 | 0.419084464 | -5.300591776 |
| 1436775_a_at | 0.076078018  | 10.07009051 | 0.844978299  | 0.419100721 | 0.419100721 | -5.300614814 |
| 1437525_a_at | 0.113425133  | 7.380411968 | 0.844959367  | 0.419110774 | 0.419110774 | -5.300629058 |
| 1442376_at   | -0.079365516 | 4.3688674   | -0.844947911 | 0.419116857 | 0.419116857 | -5.300637678 |
| 1441752_at   | -0.08379206  | 3.651334561 | -0.844924121 | 0.41912949  | 0.41912949  | -5.300655577 |
| 1453191_at   | -0.053437556 | 9.161441469 | -0.844909732 | 0.419137131 | 0.419137131 | -5.300666403 |
| 1451269_at   | -0.056648749 | 9.14509068  | -0.844905234 | 0.41913952  | 0.41913952  | -5.300669788 |

|              |              |             |              |             |             |              |
|--------------|--------------|-------------|--------------|-------------|-------------|--------------|
| 1425746_at   | -0.072726051 | 4.05403413  | -0.844822521 | 0.419183444 | 0.419183444 | -5.300732015 |
| 1448459_at   | -0.066467392 | 3.785951769 | -0.844820867 | 0.419184322 | 0.419184322 | -5.30073326  |
| 1424022_at   | -0.074862141 | 4.4856067   | -0.844798658 | 0.419196117 | 0.419196117 | -5.300749967 |
| 1417743_at   | 0.057358117  | 9.76815526  | 0.844781252  | 0.419205361 | 0.419205361 | -5.300763062 |
| 1444991_at   | -0.066541427 | 3.725547187 | -0.844710332 | 0.419243026 | 0.419243026 | -5.300816411 |
| 1427890_a_at | -0.063628079 | 7.67766229  | -0.84468097  | 0.419258621 | 0.419258621 | -5.300838498 |
| 1428707_at   | -0.069276174 | 10.36031853 | -0.844552972 | 0.419326609 | 0.419326609 | -5.300934772 |
| 1454869_at   | -0.138909527 | 6.362252379 | -0.844515618 | 0.419346451 | 0.419346451 | -5.300962866 |
| 1434221_at   | -0.110091608 | 6.715474555 | -0.844494828 | 0.419357495 | 0.419357495 | -5.300978501 |
| 1419625_at   | 0.070992781  | 3.523408231 | 0.844377629  | 0.419419756 | 0.419419756 | -5.301066637 |
| 1448728_a_at | -0.067481925 | 6.999957702 | -0.844327469 | 0.419446405 | 0.419446405 | -5.301104355 |
| 1442052_at   | 0.066004702  | 7.976787452 | 0.844326376  | 0.419446986 | 0.419446986 | -5.301105177 |
| 1429199_s_at | -0.057258984 | 8.667447723 | -0.844323312 | 0.419448614 | 0.419448614 | -5.301107481 |
| 1416823_a_at | 0.077750996  | 8.208749238 | 0.844317467  | 0.419451719 | 0.419451719 | -5.301111876 |
| 1424335_at   | -0.068228424 | 6.993813009 | -0.844299581 | 0.419461222 | 0.419461222 | -5.301125325 |
| 1416428_at   | 0.060234592  | 9.123999824 | 0.844284726  | 0.419469115 | 0.419469115 | -5.301136495 |
| 1444693_at   | 0.081301261  | 6.855453207 | 0.844253763  | 0.419485566 | 0.419485566 | -5.301159775 |
| 1415962_at   | 0.056434088  | 11.66014043 | 0.84419664   | 0.419515918 | 0.419515918 | -5.301202724 |
| 1416240_at   | -0.052651597 | 11.53532893 | -0.844170072 | 0.419530035 | 0.419530035 | -5.301222699 |
| 1438861_at   | -0.062058676 | 10.60747084 | -0.844089473 | 0.419572864 | 0.419572864 | -5.301283292 |
| 1420006_at   | -0.090063016 | 3.621699707 | -0.844070727 | 0.419582826 | 0.419582826 | -5.301297385 |
| 1420256_x_at | 0.058977297  | 4.319589964 | 0.844061762  | 0.41958759  | 0.41958759  | -5.301304124 |
| 1427772_at   | 0.071129709  | 4.6444237   | 0.84394345   | 0.419650466 | 0.419650466 | -5.301393059 |
| 1423002_at   | -0.065279105 | 6.619549693 | -0.843942112 | 0.419651177 | 0.419651177 | -5.301394064 |
| 1420457_at   | -0.072802468 | 5.191057743 | -0.843878891 | 0.419684778 | 0.419684778 | -5.301441583 |
| 1448339_at   | -0.067187875 | 9.717546209 | -0.843858945 | 0.419695379 | 0.419695379 | -5.301456574 |
| 1447106_at   | -0.133641281 | 3.574295541 | -0.843853642 | 0.419698198 | 0.419698198 | -5.301460559 |
| 1455721_at   | 0.071163383  | 5.002648516 | 0.843822621  | 0.419714686 | 0.419714686 | -5.301483874 |
| 1450241_a_at | 0.139140114  | 5.119377484 | 0.843762139  | 0.419746835 | 0.419746835 | -5.301529329 |
| 1425475_at   | -0.063518497 | 7.517628549 | -0.843730037 | 0.419763899 | 0.419763899 | -5.301553453 |
| 1432972_at   | 0.079074691  | 4.769638101 | 0.843697453  | 0.41978122  | 0.41978122  | -5.301577939 |
| 1426193_at   | -0.084875447 | 4.05985348  | -0.843640808 | 0.419811332 | 0.419811332 | -5.301620505 |
| 1436085_at   | 0.06253856   | 8.538642177 | 0.843629847  | 0.419817159 | 0.419817159 | -5.301628741 |
| 1442766_at   | -0.063148685 | 4.393027704 | -0.843438833 | 0.419918714 | 0.419918714 | -5.301772259 |
| 1426337_a_at | 0.120866078  | 3.87368298  | 0.843371104  | 0.419954726 | 0.419954726 | -5.301823139 |
| 1424683_at   | -0.0830283   | 8.116348841 | -0.843287608 | 0.419999126 | 0.419999126 | -5.301885861 |
| 1458237_at   | 0.063120636  | 3.267727897 | 0.843138962  | 0.420078177 | 0.420078177 | -5.30199751  |
| 1422884_at   | 0.071149647  | 11.05746168 | 0.84312244   | 0.420086964 | 0.420086964 | -5.302009918 |
| 1440871_at   | -0.086795866 | 4.508156621 | -0.843084016 | 0.4201074   | 0.4201074   | -5.302038775 |
| 1435338_at   | 0.112612746  | 9.01536583  | 0.843019345  | 0.420141797 | 0.420141797 | -5.302087342 |
| 1444631_at   | 0.070037261  | 4.068609065 | 0.842973076  | 0.420166408 | 0.420166408 | -5.302122088 |
| 1423525_at   | -0.064632529 | 7.061866178 | -0.842926775 | 0.420191037 | 0.420191037 | -5.302156855 |
| 1460115_at   | 0.056397931  | 6.396305865 | 0.842886334  | 0.420212549 | 0.420212549 | -5.302187221 |
| 1418862_at   | -0.074530737 | 6.251345257 | -0.842872177 | 0.420220081 | 0.420220081 | -5.302197851 |
| 1419578_at   | -0.056163053 | 4.856159205 | -0.84286163  | 0.420225691 | 0.420225691 | -5.30220577  |
| 1444951_at   | -0.098441308 | 4.307234772 | -0.842854105 | 0.420229694 | 0.420229694 | -5.30221142  |
| 1419574_at   | -0.119688813 | 8.089489083 | -0.84283613  | 0.420239257 | 0.420239257 | -5.302224917 |
| 1421084_at   | -0.064681028 | 3.307328113 | -0.84282752  | 0.420243837 | 0.420243837 | -5.302231381 |
| 1420003_at   | 0.06730789   | 6.694718995 | 0.842826595  | 0.420244329 | 0.420244329 | -5.302232076 |
| 1420116_s_at | -0.072392031 | 8.025021036 | -0.84280271  | 0.420257036 | 0.420257036 | -5.302250009 |
| 1422841_at   | -0.067663807 | 5.506559415 | -0.842801052 | 0.420257918 | 0.420257918 | -5.302251253 |
| 1424304_at   | 0.079316282  | 5.773730782 | 0.842604144  | 0.420362681 | 0.420362681 | -5.302399076 |
| 1422096_at   | -0.078293793 | 4.004199979 | -0.842569793 | 0.420380959 | 0.420380959 | -5.302424861 |

|              |              |             |              |             |             |              |
|--------------|--------------|-------------|--------------|-------------|-------------|--------------|
| 1422918_at   | 0.085828735  | 4.99870151  | 0.842483182  | 0.420427047 | 0.420427047 | -5.302489871 |
| 1435850_at   | -0.061087214 | 4.40836481  | -0.842299941 | 0.420524565 | 0.420524565 | -5.302627391 |
| 1460228_at   | -0.093612977 | 7.681183022 | -0.842287695 | 0.420531083 | 0.420531083 | -5.302636581 |
| 1446170_at   | -0.063983036 | 3.851132297 | -0.842242768 | 0.420554995 | 0.420554995 | -5.302670293 |
| 1436342_a_at | 0.056398018  | 9.496690549 | 0.842241469  | 0.420555687 | 0.420555687 | -5.302671268 |
| 1427571_at   | -0.071794439 | 4.91054154  | -0.842239512 | 0.420556728 | 0.420556728 | -5.302672736 |
| 1435006_s_at | -0.053367387 | 8.801040794 | -0.842145985 | 0.42060651  | 0.42060651  | -5.302742913 |
| 1452533_at   | -0.087610938 | 4.849429176 | -0.842130918 | 0.420614531 | 0.420614531 | -5.302754218 |
| 1443629_at   | -0.087462278 | 4.500194828 | -0.841776277 | 0.420803338 | 0.420803338 | -5.303020256 |
| 1448268_at   | 0.092822633  | 11.09309706 | 0.841763719  | 0.420810024 | 0.420810024 | -5.303029675 |
| 1442362_at   | -0.067132504 | 3.897565581 | -0.841751883 | 0.420816327 | 0.420816327 | -5.303038552 |
| 1440360_at   | -0.078707055 | 5.563130451 | -0.841711178 | 0.420838002 | 0.420838002 | -5.30306908  |
| 1445473_at   | -0.074177373 | 5.141727232 | -0.841604761 | 0.420894671 | 0.420894671 | -5.303148887 |
| 1439324_at   | -0.080008769 | 5.259310556 | -0.841581584 | 0.420907014 | 0.420907014 | -5.303166267 |
| 1437804_at   | -0.069771268 | 6.414270019 | -0.841574078 | 0.420911011 | 0.420911011 | -5.303171895 |
| 1417337_at   | 0.059486685  | 3.310639939 | 0.841538535  | 0.420929941 | 0.420929941 | -5.303198548 |
| 1422357_at   | -0.06466276  | 3.360405648 | -0.841482003 | 0.420960049 | 0.420960049 | -5.303240936 |
| 1437996_s_at | 0.063361783  | 3.262144253 | 0.841366686  | 0.421021471 | 0.421021471 | -5.303327397 |
| 1416298_at   | -0.217561351 | 7.963169845 | -0.841350643 | 0.421030016 | 0.421030016 | -5.303339425 |
| 1451777_at   | 0.071405889  | 3.682385513 | 0.841345106  | 0.421032966 | 0.421032966 | -5.303343576 |
| 1446111_at   | 0.080034924  | 3.421362734 | 0.841341903  | 0.421034672 | 0.421034672 | -5.303345977 |
| 1435497_at   | 0.098400645  | 6.956918666 | 0.841311588  | 0.42105082  | 0.42105082  | -5.303368704 |
| 1454225_s_at | 0.054627839  | 4.456505158 | 0.841242058  | 0.421087859 | 0.421087859 | -5.303420827 |
| 1420552_s_at | -0.079610684 | 4.661409892 | -0.841229819 | 0.421094379 | 0.421094379 | -5.303430002 |
| 1454128_at   | 0.070983571  | 3.994185941 | 0.841162056  | 0.421130479 | 0.421130479 | -5.303480797 |
| 1430960_at   | -0.065662985 | 3.97890094  | -0.8411004   | 0.421163327 | 0.421163327 | -5.303527011 |
| 1447038_x_at | 0.097465559  | 5.623014414 | 0.841085978  | 0.421171011 | 0.421171011 | -5.30353782  |
| 1441934_at   | 0.07056822   | 3.367967108 | 0.841082751  | 0.42117273  | 0.42117273  | -5.303540239 |
| 1431167_at   | 0.062689317  | 3.737663181 | 0.841028425  | 0.421201675 | 0.421201675 | -5.303580956 |
| 1437456_x_at | 0.053700766  | 10.58559377 | 0.840990456  | 0.421221906 | 0.421221906 | -5.303609411 |
| 1452512_a_at | -0.092158006 | 3.6523368   | -0.840932068 | 0.421253018 | 0.421253018 | -5.303653168 |
| 1444692_at   | 0.073425766  | 3.219395192 | 0.840761707  | 0.421343803 | 0.421343803 | -5.303780825 |
| 1453280_at   | -0.053413434 | 3.396363143 | -0.840758154 | 0.421345696 | 0.421345696 | -5.303783487 |
| 1438387_x_at | -0.066670226 | 5.336132571 | -0.840734577 | 0.421358262 | 0.421358262 | -5.303801152 |
| 1454007_a_at | -0.059343912 | 3.827710683 | -0.840718109 | 0.421367038 | 0.421367038 | -5.303813491 |
| 1444390_at   | -0.063839039 | 3.491977866 | -0.84066187  | 0.421397012 | 0.421397012 | -5.303855625 |
| 1433962_at   | 0.083433718  | 7.534690867 | 0.840626745  | 0.421415734 | 0.421415734 | -5.303881941 |
| 1453576_at   | -0.086370872 | 8.134942268 | -0.840598712 | 0.421430675 | 0.421430675 | -5.303902942 |
| 1451438_s_at | -0.072002838 | 5.258418918 | -0.840575912 | 0.421442828 | 0.421442828 | -5.303920022 |
| 1454293_at   | -0.078214393 | 3.845323261 | -0.840507456 | 0.421479317 | 0.421479317 | -5.303971302 |
| 1443462_at   | 0.059190584  | 3.339333727 | 0.840503016  | 0.421481685 | 0.421481685 | -5.303974628 |
| 1435174_at   | 0.077934391  | 8.209025518 | 0.840464634  | 0.421502144 | 0.421502144 | -5.304003378 |
| 1419569_a_at | 0.073553459  | 6.000895298 | 0.840461581  | 0.421503772 | 0.421503772 | -5.304005665 |
| 1455968_x_at | -0.061735961 | 11.72708478 | -0.840437104 | 0.421516821 | 0.421516821 | -5.304024    |
| 1447454_at   | 0.065302166  | 5.383757128 | 0.840380104  | 0.421547207 | 0.421547207 | -5.304066693 |
| 1452691_at   | 0.050439091  | 10.06708927 | 0.840321662  | 0.421578364 | 0.421578364 | -5.304110463 |
| 1425754_a_at | -0.087663671 | 3.133448686 | -0.840292026 | 0.421594164 | 0.421594164 | -5.304132658 |
| 1455087_at   | 0.14700195   | 6.154022075 | 0.840290346  | 0.42159506  | 0.42159506  | -5.304133917 |
| 1456342_at   | 0.088126257  | 4.766006425 | 0.840252563  | 0.421615205 | 0.421615205 | -5.304162212 |
| 1440458_at   | -0.069346612 | 3.351548282 | -0.840218709 | 0.421633255 | 0.421633255 | -5.304187564 |
| 1424815_at   | 0.065675658  | 3.710216112 | 0.840063421  | 0.421716058 | 0.421716058 | -5.304303844 |
| 1436210_at   | 0.063036837  | 7.685168119 | 0.840061603  | 0.421717028 | 0.421717028 | -5.304305205 |
| 1456965_at   | -0.0873442   | 6.491148645 | -0.840028209 | 0.421734836 | 0.421734836 | -5.304330209 |

|              |              |             |              |             |             |              |
|--------------|--------------|-------------|--------------|-------------|-------------|--------------|
| 1453563_at   | -0.074835742 | 5.112854101 | -0.839993339 | 0.421753431 | 0.421753431 | -5.304356316 |
| 1449790_at   | -0.069799112 | 3.334532088 | -0.839991021 | 0.421754668 | 0.421754668 | -5.304358051 |
| 1444083_at   | -0.30501791  | 6.555882483 | -0.839986487 | 0.421757085 | 0.421757085 | -5.304361445 |
| 1422888_at   | 0.057618725  | 9.619169537 | 0.83996429   | 0.421768923 | 0.421768923 | -5.304378064 |
| 1446249_at   | 0.072497992  | 3.449363101 | 0.839949852  | 0.421776623 | 0.421776623 | -5.304388873 |
| 1420444_at   | -0.079925552 | 4.965391573 | -0.839891849 | 0.421807557 | 0.421807557 | -5.304432296 |
| 1448151_at   | -0.050695043 | 10.05136697 | -0.839888061 | 0.421809578 | 0.421809578 | -5.304435132 |
| 1449175_at   | -0.119164674 | 3.956881397 | -0.839869014 | 0.421819736 | 0.421819736 | -5.304449391 |
| 1440706_at   | -0.075865436 | 6.212722151 | -0.839813278 | 0.421849464 | 0.421849464 | -5.304491113 |
| 1419062_at   | 0.057568528  | 10.37497461 | 0.83964529   | 0.421939071 | 0.421939071 | -5.304616851 |
| 1432671_at   | -0.080335809 | 3.855584934 | -0.839617161 | 0.421954077 | 0.421954077 | -5.304637904 |
| 1442220_at   | -0.08400909  | 3.294329753 | -0.839617085 | 0.421954117 | 0.421954117 | -5.304637961 |
| 1435432_at   | 0.092211828  | 7.494145798 | 0.839613662  | 0.421955943 | 0.421955943 | -5.304640522 |
| 1417703_at   | 0.092465645  | 7.643962815 | 0.839596779  | 0.42196495  | 0.42196495  | -5.304653158 |
| 1457046_s_at | -0.070073169 | 4.019614859 | -0.839593597 | 0.421966648 | 0.421966648 | -5.304655539 |
| 1429704_at   | -0.059817402 | 3.133093138 | -0.839572263 | 0.421978029 | 0.421978029 | -5.304671505 |
| 1420711_a_at | -0.058404794 | 9.132582188 | -0.839552049 | 0.421988813 | 0.421988813 | -5.304686632 |
| 1440535_at   | -0.07993318  | 5.622214951 | -0.83954942  | 0.421990215 | 0.421990215 | -5.304688599 |
| 1440576_at   | -0.08219048  | 4.054905127 | -0.839543803 | 0.421993212 | 0.421993212 | -5.304692803 |
| 1444739_at   | -0.11603891  | 4.905389181 | -0.839460562 | 0.422037622 | 0.422037622 | -5.304755094 |
| 1426534_a_at | -0.084719124 | 8.514218201 | -0.839396417 | 0.422071847 | 0.422071847 | -5.304803092 |
| 1423476_at   | -0.076388146 | 3.678920502 | -0.839365909 | 0.422088125 | 0.422088125 | -5.304825918 |
| 1455150_at   | -0.10481981  | 4.951914586 | -0.839343447 | 0.422100111 | 0.422100111 | -5.304842725 |
| 1435624_at   | 0.05496035   | 5.030532681 | 0.839336434  | 0.422103853 | 0.422103853 | -5.304847972 |
| 1432740_at   | -0.061791508 | 4.386809789 | -0.839247613 | 0.422151249 | 0.422151249 | -5.304914425 |
| 1417848_at   | -0.056384054 | 8.980554367 | -0.839181294 | 0.42218664  | 0.42218664  | -5.304964038 |
| 1441623_at   | -0.057561165 | 3.192827785 | -0.839147158 | 0.422204858 | 0.422204858 | -5.304989575 |
| 1455335_at   | -0.05717972  | 7.2767019   | -0.839081275 | 0.422240019 | 0.422240019 | -5.305038857 |
| 1454380_at   | -0.073023914 | 4.305152717 | -0.839053333 | 0.422254933 | 0.422254933 | -5.305059758 |
| 1437602_at   | -0.075195517 | 3.551538889 | -0.839029275 | 0.422267773 | 0.422267773 | -5.305077752 |
| 1450287_at   | -0.099454251 | 5.818151983 | -0.839022876 | 0.422271188 | 0.422271188 | -5.305082538 |
| 1450908_at   | -0.055662661 | 11.28225263 | -0.838980483 | 0.422293816 | 0.422293816 | -5.305114246 |
| 1451437_at   | 0.094543615  | 9.454563892 | 0.838969538  | 0.422299658 | 0.422299658 | -5.305122432 |
| 1448165_at   | 0.052630856  | 9.66149929  | 0.838869567  | 0.422353021 | 0.422353021 | -5.305197199 |
| 1434503_s_at | 0.071651093  | 10.70943555 | 0.83884573   | 0.422365746 | 0.422365746 | -5.305215025 |
| 1441020_at   | 0.097562676  | 6.12010425  | 0.838834645  | 0.422371663 | 0.422371663 | -5.305223315 |
| 1417325_at   | -0.066699496 | 5.648427949 | -0.838741151 | 0.422421575 | 0.422421575 | -5.305293228 |
| 1442227_at   | 0.075855571  | 3.427690688 | 0.838623053  | 0.422484626 | 0.422484626 | -5.30538153  |
| 1431371_at   | -0.071656447 | 3.764761974 | -0.838622525 | 0.422484909 | 0.422484909 | -5.305381926 |
| 1446330_at   | 0.132003726  | 5.094126677 | 0.838592753  | 0.422500805 | 0.422500805 | -5.305404185 |
| 1420408_a_at | 0.120300221  | 5.834599975 | 0.838577851  | 0.422508761 | 0.422508761 | -5.305415326 |
| 1451207_at   | -0.058173336 | 8.711473536 | -0.838536661 | 0.422530755 | 0.422530755 | -5.30544612  |
| 1428083_at   | 0.112768958  | 8.177290877 | 0.838403541  | 0.422601841 | 0.422601841 | -5.305545634 |
| 1453383_at   | -0.077324839 | 3.381429496 | -0.838260363 | 0.422678306 | 0.422678306 | -5.305652651 |
| 1430780_a_at | 0.052073332  | 6.958761845 | 0.838135105  | 0.422745208 | 0.422745208 | -5.305746261 |
| 1434302_at   | -0.085999195 | 9.491156804 | -0.838112345 | 0.422757366 | 0.422757366 | -5.30576327  |
| 1425668_a_at | -0.063369613 | 7.860611835 | -0.837925308 | 0.422857282 | 0.422857282 | -5.305903026 |
| 1441554_at   | -0.078324495 | 4.140637333 | -0.837787678 | 0.422930814 | 0.422930814 | -5.306005847 |
| 1419967_at   | 0.067895632  | 6.444695909 | 0.837748581  | 0.422951704 | 0.422951704 | -5.306035053 |
| 1423088_at   | 0.054070001  | 9.66860751  | 0.837701746  | 0.42297673  | 0.42297673  | -5.306070038 |
| 1436936_s_at | -1.505940491 | 10.42481223 | -0.837620871 | 0.423019947 | 0.423019947 | -5.306130447 |
| 1434164_s_at | -0.056629588 | 3.300094506 | -0.837551327 | 0.423057111 | 0.423057111 | -5.306182388 |
| 1436658_at   | 0.097849589  | 3.426614452 | 0.837546281  | 0.423059808 | 0.423059808 | -5.306186157 |

|              |              |             |              |             |             |              |
|--------------|--------------|-------------|--------------|-------------|-------------|--------------|
| 1450894_a_at | -0.063007613 | 10.12156709 | -0.837542772 | 0.423061683 | 0.423061683 | -5.306188777 |
| 1446886_at   | 0.069769815  | 4.861784452 | 0.837519441  | 0.423074152 | 0.423074152 | -5.306206201 |
| 1434672_at   | 0.203649554  | 4.509775538 | 0.837519408  | 0.42307417  | 0.42307417  | -5.306206226 |
| 1441329_at   | 0.072515662  | 3.497614246 | 0.837485471  | 0.423092307 | 0.423092307 | -5.306231571 |
| 1443302_at   | -0.076432493 | 6.687245974 | -0.837402865 | 0.423136457 | 0.423136457 | -5.306293259 |
| 1436571_at   | -0.079121865 | 8.587195396 | -0.837280697 | 0.423201758 | 0.423201758 | -5.306384482 |
| 1426238_at   | -0.101584178 | 9.636179449 | -0.837254213 | 0.423215915 | 0.423215915 | -5.306404257 |
| 1459389_at   | 0.069883006  | 4.974117729 | 0.837235774  | 0.423225772 | 0.423225772 | -5.306418024 |
| 1452652_at   | -0.09278714  | 6.481676122 | -0.837177746 | 0.423256792 | 0.423256792 | -5.306461347 |
| 1442414_at   | -0.073676964 | 4.2806357   | -0.837133187 | 0.423280613 | 0.423280613 | -5.306494613 |
| 1437133_x_at | -0.077374179 | 10.33708157 | -0.837082933 | 0.42330748  | 0.42330748  | -5.306532129 |
| 1456065_at   | -0.067672678 | 4.921624304 | -0.837074151 | 0.423312175 | 0.423312175 | -5.306538685 |
| 1432588_at   | 0.05650073   | 3.744000994 | 0.83704513   | 0.423327691 | 0.423327691 | -5.306560348 |
| 1419257_at   | -0.068556692 | 9.790065187 | -0.836997233 | 0.4233533   | 0.4233533   | -5.306596101 |
| 1451260_at   | -0.101671015 | 4.942765986 | -0.836784389 | 0.423467112 | 0.423467112 | -5.30675496  |
| 1431083_a_at | -0.061518478 | 4.155927502 | -0.836783431 | 0.423467625 | 0.423467625 | -5.306755675 |
| 1416018_at   | 0.077075679  | 7.880866323 | 0.836688843  | 0.423518209 | 0.423518209 | -5.30682626  |
| 1460163_at   | 0.113264134  | 4.902640698 | 0.836665415  | 0.423530739 | 0.423530739 | -5.306843742 |
| 1459403_at   | 0.090303537  | 5.576224772 | 0.836610438  | 0.423560143 | 0.423560143 | -5.306884764 |
| 1438525_at   | -0.059626582 | 5.766890041 | -0.836564089 | 0.423584933 | 0.423584933 | -5.306919347 |
| 1444229_at   | -0.089910631 | 5.954507548 | -0.836515698 | 0.423610817 | 0.423610817 | -5.306955451 |
| 1428028_at   | 0.07367877   | 5.54716773  | 0.836489384  | 0.423624892 | 0.423624892 | -5.306975084 |
| 1450596_at   | -0.074633131 | 4.285574899 | -0.836484888 | 0.423627297 | 0.423627297 | -5.306978438 |
| 1425733_a_at | 0.092609115  | 6.905167872 | 0.836431355  | 0.423655933 | 0.423655933 | -5.307018375 |
| 1449292_at   | 0.189128651  | 6.868078254 | 0.836348213  | 0.42370041  | 0.42370041  | -5.307080398 |
| 1455234_at   | -0.087813541 | 3.507280874 | -0.836346929 | 0.423701097 | 0.423701097 | -5.307081355 |
| 1457414_at   | 0.105638963  | 3.988207153 | 0.836185385  | 0.423787525 | 0.423787525 | -5.30720185  |
| 1453594_at   | -0.071961438 | 3.807311173 | -0.836096244 | 0.423835221 | 0.423835221 | -5.30726833  |
| 1458133_at   | -0.092175357 | 3.887044947 | -0.836090758 | 0.423838157 | 0.423838157 | -5.307272422 |
| 1422435_at   | -0.067394718 | 4.331539935 | -0.836045581 | 0.423862331 | 0.423862331 | -5.307306112 |
| 1424613_at   | 0.075762606  | 8.210814225 | 0.836035929  | 0.423867496 | 0.423867496 | -5.30731331  |
| 1427434_at   | 0.091628778  | 4.740400567 | 0.835960075  | 0.423908088 | 0.423908088 | -5.307369874 |
| 1448076_at   | -0.098021683 | 6.421256513 | -0.835954722 | 0.423910952 | 0.423910952 | -5.307373865 |
| 1438989_s_at | 0.154773609  | 9.391400221 | 0.835924533  | 0.423927109 | 0.423927109 | -5.307396376 |
| 1459300_at   | -0.063213184 | 5.354563734 | -0.835902496 | 0.423938902 | 0.423938902 | -5.307412807 |
| 1434617_x_at | -0.080861547 | 7.401676271 | -0.835812738 | 0.42398694  | 0.42398694  | -5.307479729 |
| 1445490_at   | -0.098877856 | 6.187747069 | -0.835762854 | 0.42401364  | 0.42401364  | -5.307516919 |
| 1444852_at   | 0.075279425  | 3.875562378 | 0.835759638  | 0.424015361 | 0.424015361 | -5.307519316 |
| 1447386_at   | 0.074897167  | 3.747349594 | 0.835660068  | 0.424068658 | 0.424068658 | -5.307593543 |
| 1421043_s_at | 0.085492888  | 8.218956751 | 0.835642912  | 0.424077841 | 0.424077841 | -5.307606332 |
| 1443673_x_at | -0.079475593 | 5.610792967 | -0.835620382 | 0.424089901 | 0.424089901 | -5.307623126 |
| 1455553_at   | -0.057110165 | 7.288763564 | -0.835448226 | 0.424182064 | 0.424182064 | -5.30775144  |
| 1429192_at   | 0.085305606  | 9.371175643 | 0.835413961  | 0.42420041  | 0.42420041  | -5.307776977 |
| 1422988_at   | -0.083095608 | 5.307550273 | -0.835267639 | 0.424278756 | 0.424278756 | -5.307886015 |
| 1421918_at   | 0.066048618  | 8.834946441 | 0.835250091  | 0.424288153 | 0.424288153 | -5.307899091 |
| 1457806_at   | -0.079599038 | 8.960100985 | -0.835200527 | 0.424314694 | 0.424314694 | -5.307936022 |
| 1447526_at   | -0.188096706 | 7.356529207 | -0.835186394 | 0.424322262 | 0.424322262 | -5.307946552 |
| 1427525_at   | -0.090994382 | 6.952346264 | -0.835160001 | 0.424336395 | 0.424336395 | -5.307966216 |
| 1443709_at   | -0.056191265 | 3.563659131 | -0.83513175  | 0.424351525 | 0.424351525 | -5.307987265 |
| 1416527_at   | -0.072164476 | 7.387252605 | -0.835130916 | 0.424351971 | 0.424351971 | -5.307987886 |
| 1459090_at   | -0.070373909 | 5.103024584 | -0.8350785   | 0.424380042 | 0.424380042 | -5.308026937 |
| 1442022_at   | -0.079890524 | 4.820885522 | -0.834884424 | 0.42448399  | 0.42448399  | -5.308171509 |
| 1420188_at   | -0.087023537 | 3.300747649 | -0.834866802 | 0.424493429 | 0.424493429 | -5.308184634 |



|              |              |             |              |             |             |              |
|--------------|--------------|-------------|--------------|-------------|-------------|--------------|
| 1439855_at   | 0.100177883  | 4.402966824 | 0.834840227  | 0.424507664 | 0.424507664 | -5.308204428 |
| 1418839_at   | 0.06228559   | 7.56322323  | 0.83483362   | 0.424511203 | 0.424511203 | -5.308209349 |
| 1419740_at   | 0.071567019  | 4.358830852 | 0.834812559  | 0.424522485 | 0.424522485 | -5.308225036 |
| 1435553_at   | -0.136290287 | 7.903204963 | -0.8346003   | 0.424636199 | 0.424636199 | -5.308383109 |
| 1459138_at   | 0.072466316  | 4.156405598 | 0.834578632  | 0.424647807 | 0.424647807 | -5.308399243 |
| 1427132_at   | 0.071284351  | 7.084156676 | 0.834567358  | 0.424653848 | 0.424653848 | -5.308407638 |
| 1458772_at   | -0.105566378 | 4.628133066 | -0.834553034 | 0.424661523 | 0.424661523 | -5.308418304 |
| 1421638_at   | -0.094358652 | 3.780490668 | -0.834525111 | 0.424676484 | 0.424676484 | -5.308439095 |
| 1435405_at   | 0.079374495  | 5.629376727 | 0.834484559  | 0.424698213 | 0.424698213 | -5.308469289 |
| 1439706_at   | 0.053912127  | 4.306854457 | 0.834476575  | 0.424702491 | 0.424702491 | -5.308475233 |
| 1427450_x_at | 0.059612095  | 8.991916782 | 0.834461272  | 0.424710691 | 0.424710691 | -5.308486627 |
| 1416106_at   | 0.062572757  | 8.918688068 | 0.83445599   | 0.424713521 | 0.424713521 | -5.30849056  |
| 1446276_at   | -0.104541452 | 5.448415401 | -0.834398834 | 0.424744149 | 0.424744149 | -5.308533113 |
| 1432457_at   | -0.061155206 | 5.076660305 | -0.834394911 | 0.424746251 | 0.424746251 | -5.308536033 |
| 1453851_a_at | -0.096375362 | 8.394227111 | -0.834381992 | 0.424753174 | 0.424753174 | -5.308545651 |
| 1432018_at   | 0.073117993  | 3.229385053 | 0.834379189  | 0.424754676 | 0.424754676 | -5.308547738 |
| 1425074_at   | -0.065577802 | 6.989929725 | -0.83436244  | 0.424763651 | 0.424763651 | -5.308560207 |
| 1440947_at   | -0.086041378 | 5.585587989 | -0.834324677 | 0.424783889 | 0.424783889 | -5.30858832  |
| 1423385_at   | 0.059641192  | 8.494577039 | 0.834314756  | 0.424789205 | 0.424789205 | -5.308595705 |
| 1435232_x_at | -0.055952002 | 9.624494423 | -0.834302203 | 0.424795932 | 0.424795932 | -5.308605049 |
| 1438891_at   | 0.143360065  | 6.422292724 | 0.834236195  | 0.424831308 | 0.424831308 | -5.308654185 |
| 1436796_at   | -0.075366893 | 9.498898538 | -0.83419453  | 0.424853638 | 0.424853638 | -5.308685198 |
| 1431796_at   | -0.059427166 | 3.937560491 | -0.834173875 | 0.424864709 | 0.424864709 | -5.308700572 |
| 1453112_a_at | 0.086714359  | 6.146817736 | 0.834126232  | 0.424890245 | 0.424890245 | -5.308736033 |
| 1448375_at   | 0.064406336  | 6.803465279 | 0.834054857  | 0.424928503 | 0.424928503 | -5.308789154 |
| 1431370_at   | 0.08254338   | 3.889189348 | 0.833979616  | 0.424968836 | 0.424968836 | -5.308845149 |
| 1422456_at   | -0.102266981 | 8.893155158 | -0.833976894 | 0.424970294 | 0.424970294 | -5.308847174 |
| 1430737_at   | -0.084586043 | 4.601287089 | -0.833947598 | 0.424985999 | 0.424985999 | -5.308868975 |
| 1438419_at   | -0.060554805 | 8.330410254 | -0.833918273 | 0.42500172  | 0.42500172  | -5.308890797 |
| 1460291_at   | 0.094031358  | 5.005643197 | 0.8337859    | 0.425072688 | 0.425072688 | -5.308989292 |
| 1424275_s_at | 0.089994188  | 8.633809905 | 0.833768754  | 0.425081881 | 0.425081881 | -5.309002049 |
| 1424907_a_at | -0.07032762  | 8.806415899 | -0.833686323 | 0.425126079 | 0.425126079 | -5.309063376 |
| 1457213_a_at | -0.066597433 | 6.635816039 | -0.833672971 | 0.425133238 | 0.425133238 | -5.309073309 |
| 1418792_at   | 0.085425681  | 6.141714137 | 0.833450941  | 0.425252303 | 0.425252303 | -5.309238467 |
| 1429413_at   | 0.063426889  | 9.395399156 | 0.833427432  | 0.425264911 | 0.425264911 | -5.309255952 |
| 1443263_at   | 0.093347606  | 6.323285667 | 0.833378277  | 0.425291274 | 0.425291274 | -5.309292511 |
| 1424887_at   | -0.104323899 | 7.244843273 | -0.833302239 | 0.425332058 | 0.425332058 | -5.309349059 |
| 1428830_at   | 0.061108311  | 7.820773121 | 0.833211795  | 0.425380571 | 0.425380571 | -5.309416315 |
| 1447052_at   | -0.056895006 | 6.084036921 | -0.833189251 | 0.425392665 | 0.425392665 | -5.309433079 |
| 1435475_at   | 0.057749332  | 8.914469891 | 0.833041683  | 0.425471829 | 0.425471829 | -5.309542799 |
| 1425446_at   | -0.083263784 | 3.791124429 | -0.833031003 | 0.425477559 | 0.425477559 | -5.309550739 |
| 1418351_a_at | 0.066811908  | 6.90275904  | 0.833022103  | 0.425482334 | 0.425482334 | -5.309557356 |
| 1424240_at   | -0.050139151 | 9.306045702 | -0.833009697 | 0.42548899  | 0.42548899  | -5.309566578 |
| 1432141_x_at | -0.059692287 | 4.752302132 | -0.832989028 | 0.425500079 | 0.425500079 | -5.309581945 |
| 1438886_at   | -0.054098504 | 6.148975478 | -0.832981103 | 0.425504331 | 0.425504331 | -5.309587836 |
| 1451032_at   | -0.067721079 | 3.17054491  | -0.832905212 | 0.42554505  | 0.42554505  | -5.309644253 |
| 1416962_at   | -0.082104296 | 7.910108465 | -0.832860157 | 0.425569225 | 0.425569225 | -5.309677744 |
| 1450480_a_at | 0.107247965  | 6.495929316 | 0.83268421   | 0.425663641 | 0.425663641 | -5.309808519 |
| 1445144_at   | -0.053706987 | 6.227050855 | -0.832616159 | 0.425700162 | 0.425700162 | -5.309859092 |
| 1443131_at   | 0.066377058  | 3.347903053 | 0.832586326  | 0.425716174 | 0.425716174 | -5.309881262 |
| 1444968_at   | -0.070784294 | 3.979981255 | -0.832577507 | 0.425720907 | 0.425720907 | -5.309887816 |
| 1423204_at   | -0.059695839 | 7.960510356 | -0.832508907 | 0.425757726 | 0.425757726 | -5.309938792 |
| 1433730_at   | 0.062378761  | 8.993404796 | 0.832506287  | 0.425759133 | 0.425759133 | -5.309940739 |

|              |              |             |              |             |             |              |
|--------------|--------------|-------------|--------------|-------------|-------------|--------------|
| 1424159_at   | 0.086499673  | 8.023326335 | 0.832396908  | 0.425817844 | 0.425817844 | -5.310022009 |
| 1448346_at   | -0.074279144 | 10.50580898 | -0.832382959 | 0.425825331 | 0.425825331 | -5.310032373 |
| 1424775_at   | -0.080972578 | 7.092044587 | -0.832232907 | 0.425905884 | 0.425905884 | -5.310143848 |
| 1443321_at   | -0.087251575 | 6.710452071 | -0.832186393 | 0.425930856 | 0.425930856 | -5.3101784   |
| 1417889_at   | -0.319373056 | 5.987401191 | -0.832140129 | 0.425955695 | 0.425955695 | -5.310212765 |
| 1444554_at   | -0.089852794 | 6.547819777 | -0.832127634 | 0.425962404 | 0.425962404 | -5.310222046 |
| 1444350_at   | 0.099097631  | 3.395046697 | 0.832110212  | 0.425971759 | 0.425971759 | -5.310234987 |
| 1429662_at   | -0.093651085 | 5.747941375 | -0.832092586 | 0.425981223 | 0.425981223 | -5.310248079 |
| 1454386_at   | 0.072249703  | 3.462406167 | 0.832087595  | 0.425983902 | 0.425983902 | -5.310251786 |
| 1440357_at   | -0.073539916 | 5.321368517 | -0.832072366 | 0.425992079 | 0.425992079 | -5.310263097 |
| 1428595_at   | 0.07960051   | 3.189696391 | 0.832062324  | 0.425997471 | 0.425997471 | -5.310270555 |
| 1433381_at   | 0.098657399  | 3.73204225  | 0.832053442  | 0.42600224  | 0.42600224  | -5.310277152 |
| 1428691_at   | 0.055250189  | 9.313863869 | 0.832035549  | 0.426011848 | 0.426011848 | -5.310290442 |
| 1435632_at   | 0.075988724  | 6.650955203 | 0.8319461    | 0.42605988  | 0.42605988  | -5.310356873 |
| 1432991_at   | 0.075437718  | 3.677396593 | 0.831895059  | 0.42608729  | 0.42608729  | -5.310394777 |
| 1422932_a_at | -0.114623664 | 4.033844218 | -0.831875416 | 0.426097839 | 0.426097839 | -5.310409364 |
| 1427604_a_at | 0.061689247  | 8.319823063 | 0.831803987  | 0.4261362   | 0.4261362   | -5.310462404 |
| 1455310_at   | 0.06246263   | 8.263755653 | 0.831801584  | 0.42613749  | 0.42613749  | -5.310464188 |
| 1460207_s_at | 0.063798519  | 8.005257975 | 0.831766122  | 0.426156536 | 0.426156536 | -5.310490519 |
| 1450507_at   | -0.076579837 | 6.106030769 | -0.831720127 | 0.426181239 | 0.426181239 | -5.31052467  |
| 1451719_at   | -0.071537557 | 4.193985888 | -0.831633197 | 0.426227931 | 0.426227931 | -5.310589209 |
| 1460223_a_at | -0.083025307 | 6.1585289   | -0.831617784 | 0.426236211 | 0.426236211 | -5.310600652 |
| 1452820_at   | 0.062524149  | 9.71795556  | 0.831555808  | 0.426269502 | 0.426269502 | -5.310646661 |
| 1444038_at   | -0.063727623 | 5.853309743 | -0.831542816 | 0.426276481 | 0.426276481 | -5.310656306 |
| 1428391_at   | 0.083258696  | 7.400854873 | 0.831466273  | 0.4263176   | 0.4263176   | -5.310713124 |
| 1426833_at   | -0.069105427 | 9.741657729 | -0.831404949 | 0.426350546 | 0.426350546 | -5.310758642 |
| 1442168_at   | -0.059870625 | 7.315546422 | -0.831369209 | 0.426369747 | 0.426369747 | -5.310785168 |
| 1421674_at   | 0.062482736  | 5.925860607 | 0.83133604   | 0.426387568 | 0.426387568 | -5.310809786 |
| 1460540_at   | -0.068862015 | 3.486765763 | -0.831328862 | 0.426391424 | 0.426391424 | -5.310815113 |
| 1447141_at   | 0.072114108  | 3.842367093 | 0.831307006  | 0.426403167 | 0.426403167 | -5.310831334 |
| 1443981_at   | 0.100023239  | 5.281954386 | 0.831083027  | 0.426523521 | 0.426523521 | -5.310997543 |
| 1458949_at   | -0.097641406 | 3.332867595 | -0.831081477 | 0.426524354 | 0.426524354 | -5.310998693 |
| 1433693_x_at | -0.076596874 | 4.00107378  | -0.831061624 | 0.426535023 | 0.426535023 | -5.311013423 |
| 1439283_at   | 0.074113163  | 6.78599839  | 0.831042332  | 0.426545391 | 0.426545391 | -5.311027737 |
| 1429285_at   | -0.059735091 | 4.656020963 | -0.831031655 | 0.426551129 | 0.426551129 | -5.311035659 |
| 1416019_at   | 0.06314254   | 7.309946063 | 0.830949732  | 0.426595158 | 0.426595158 | -5.311096439 |
| 1439241_x_at | -0.085337101 | 6.215688564 | -0.830905232 | 0.426619075 | 0.426619075 | -5.311129452 |
| 1438098_at   | 0.060288856  | 3.544774569 | 0.830854947  | 0.426646103 | 0.426646103 | -5.311166755 |
| 1453378_at   | 0.060896318  | 3.610211566 | 0.830756335  | 0.426699109 | 0.426699109 | -5.311239903 |
| 1416410_at   | 0.051295331  | 10.28985556 | 0.830550649  | 0.426809685 | 0.426809685 | -5.311392453 |
| 1456278_x_at | 0.067929999  | 3.632275543 | 0.830497334  | 0.42683835  | 0.42683835  | -5.31143199  |
| 1416150_a_at | 0.072058556  | 11.56332066 | 0.830454818  | 0.42686121  | 0.42686121  | -5.311463517 |
| 1440243_at   | 0.057769096  | 4.807497938 | 0.830408032  | 0.426886366 | 0.426886366 | -5.311498208 |
| 1454263_at   | -0.064315356 | 5.466440105 | -0.830407994 | 0.426886387 | 0.426886387 | -5.311498237 |
| 1419591_at   | -0.079053909 | 5.221317754 | -0.83037789  | 0.426902574 | 0.426902574 | -5.311520558 |
| 1441869_x_at | 0.102650779  | 7.693255814 | 0.83037174   | 0.426905881 | 0.426905881 | -5.311525118 |
| 1428790_at   | -0.061092107 | 5.466951476 | -0.830324845 | 0.426931098 | 0.426931098 | -5.311559887 |
| 1443903_at   | -0.06838452  | 6.128279099 | -0.83031191  | 0.426938054 | 0.426938054 | -5.311569477 |
| 1453820_at   | -0.081159206 | 3.58195997  | -0.830145052 | 0.427027789 | 0.427027789 | -5.311693176 |
| 1454342_at   | -0.077508138 | 3.330885979 | -0.830134144 | 0.427033655 | 0.427033655 | -5.311701262 |
| 1439814_at   | -0.091614167 | 5.332771123 | -0.830133223 | 0.42703415  | 0.42703415  | -5.311701945 |
| 1420170_at   | 0.11938058   | 7.617383673 | 0.830129294  | 0.427036264 | 0.427036264 | -5.311704858 |
| 1441645_s_at | 0.058149024  | 10.05422959 | 0.830093642  | 0.427055439 | 0.427055439 | -5.311731284 |

|              |              |             |              |             |             |              |
|--------------|--------------|-------------|--------------|-------------|-------------|--------------|
| 1432550_at   | -0.09207513  | 4.871399724 | -0.829982865 | 0.427115024 | 0.427115024 | -5.311813393 |
| 1420620_a_at | -0.075038812 | 8.33029712  | -0.829921139 | 0.427148227 | 0.427148227 | -5.31185914  |
| 1454137_s_at | -0.21005187  | 5.733534306 | -0.829893994 | 0.427162829 | 0.427162829 | -5.311879257 |
| 1454204_at   | 0.063544824  | 3.772250007 | 0.829790123  | 0.427218709 | 0.427218709 | -5.311956231 |
| 1442740_at   | 0.083511561  | 7.395410856 | 0.82965112   | 0.427293496 | 0.427293496 | -5.312059226 |
| 1459446_at   | -0.110696333 | 3.928171913 | -0.829566139 | 0.427339222 | 0.427339222 | -5.312122186 |
| 1443527_at   | -0.115813941 | 6.817471785 | -0.829484105 | 0.427383365 | 0.427383365 | -5.312182958 |
| 1451688_s_at | -0.109379897 | 6.944796579 | -0.829442198 | 0.427405917 | 0.427405917 | -5.312214001 |
| 1437073_x_at | 0.064557214  | 7.686109448 | 0.829372308  | 0.42744353  | 0.42744353  | -5.31226577  |
| 1416969_at   | -0.079622695 | 7.402466377 | -0.829271993 | 0.42749752  | 0.42749752  | -5.31234007  |
| 1446877_at   | 0.054906384  | 3.404695824 | 0.829227223  | 0.427521617 | 0.427521617 | -5.312373227 |
| 1459290_at   | -0.06795665  | 5.281427949 | -0.829222983 | 0.427523899 | 0.427523899 | -5.312376366 |
| 1427613_at   | -0.066136351 | 3.76904772  | -0.829147274 | 0.427564651 | 0.427564651 | -5.312432433 |
| 1443191_at   | 0.12349814   | 5.1650618   | 0.829143034  | 0.427566934 | 0.427566934 | -5.312435573 |
| 1436222_at   | 0.063131011  | 9.829908606 | 0.829057778  | 0.427612828 | 0.427612828 | -5.312498704 |
| 1427951_s_at | -0.061048135 | 6.449364144 | -0.828967609 | 0.42766137  | 0.42766137  | -5.312565467 |
| 1452032_at   | 0.06017156   | 11.25330467 | 0.828959758  | 0.427665596 | 0.427665596 | -5.31257128  |
| 1425214_at   | 0.093913923  | 6.349413895 | 0.828890269  | 0.427703009 | 0.427703009 | -5.312622727 |
| 1424789_at   | 0.054975124  | 7.461127691 | 0.828858384  | 0.427720176 | 0.427720176 | -5.312646332 |
| 1419789_at   | -0.052735919 | 5.114828769 | -0.82876917  | 0.427768213 | 0.427768213 | -5.312712375 |
| 1438794_x_at | 0.065340862  | 12.17601182 | 0.828750117  | 0.427778472 | 0.427778472 | -5.312726478 |
| 1460638_at   | 0.069447731  | 8.700522732 | 0.828700818  | 0.427805018 | 0.427805018 | -5.31276297  |
| 1446737_a_at | -0.064521815 | 6.560509499 | -0.828676079 | 0.42781834  | 0.42781834  | -5.312781281 |
| 1431460_at   | -0.120786258 | 4.411816612 | -0.828652038 | 0.427831287 | 0.427831287 | -5.312799076 |
| 1440014_at   | 0.064367737  | 7.27070702  | 0.828578317  | 0.427870988 | 0.427870988 | -5.312853638 |
| 1431054_at   | -0.052159802 | 9.34345043  | -0.828569972 | 0.427875482 | 0.427875482 | -5.312859814 |
| 1426499_at   | -0.088474175 | 8.234140534 | -0.828545228 | 0.427888808 | 0.427888808 | -5.312878127 |
| 1417132_at   | -0.064735485 | 8.458016264 | -0.828472421 | 0.427928021 | 0.427928021 | -5.312932008 |
| 1433747_at   | 0.063504611  | 9.323623111 | 0.828438761  | 0.42794615  | 0.42794615  | -5.312956916 |
| 1435584_at   | -0.081368547 | 5.054251327 | -0.828436293 | 0.427947479 | 0.427947479 | -5.312958742 |
| 1453251_at   | 0.094567758  | 7.35217904  | 0.828383113  | 0.427976124 | 0.427976124 | -5.312998094 |
| 1423962_at   | 0.061651419  | 7.320099021 | 0.828380569  | 0.427977494 | 0.427977494 | -5.312999976 |
| 1455862_at   | 0.06589979   | 9.994371507 | 0.828363523  | 0.427986676 | 0.427986676 | -5.313012589 |
| 1426758_s_at | -0.178747126 | 12.09944308 | -0.828348366 | 0.42799484  | 0.42799484  | -5.313023804 |
| 1416309_at   | 0.04947287   | 9.748831986 | 0.828300567  | 0.428020588 | 0.428020588 | -5.313059171 |
| 1423620_at   | 0.062880297  | 8.418126228 | 0.828258328  | 0.428043342 | 0.428043342 | -5.313090423 |
| 1419111_at   | -0.057872352 | 8.396284927 | -0.82819308  | 0.428078491 | 0.428078491 | -5.313138695 |
| 1441453_at   | 0.091749754  | 3.734420085 | 0.828187101  | 0.428081713 | 0.428081713 | -5.313143118 |
| 1422038_a_at | -0.082169222 | 5.181490435 | -0.828152978 | 0.428100096 | 0.428100096 | -5.313168362 |
| 1460615_at   | -0.060769511 | 7.060932722 | -0.82815138  | 0.428100957 | 0.428100957 | -5.313169544 |
| 1455889_at   | 0.053215962  | 4.096163524 | 0.828124572  | 0.4281154   | 0.4281154   | -5.313189376 |
| 1423564_a_at | 0.065915165  | 11.28660186 | 0.828062026  | 0.428149098 | 0.428149098 | -5.313235643 |
| 1429825_at   | -0.060907148 | 3.655925264 | -0.827929955 | 0.42822026  | 0.42822026  | -5.313333333 |
| 1435778_at   | -0.068700444 | 9.588122349 | -0.827879207 | 0.428247606 | 0.428247606 | -5.313370863 |
| 1433512_at   | 0.091416946  | 7.230071671 | 0.827850154  | 0.428263262 | 0.428263262 | -5.313392349 |
| 1454064_a_at | 0.066101662  | 8.913065857 | 0.827847445  | 0.428264722 | 0.428264722 | -5.313394353 |
| 1434168_at   | 0.055449383  | 8.398540262 | 0.827821488  | 0.42827871  | 0.42827871  | -5.313413549 |
| 1445964_at   | -0.070221666 | 3.644415769 | -0.827808304 | 0.428285814 | 0.428285814 | -5.313423298 |
| 1421067_a_at | -0.086077481 | 5.998725632 | -0.827793196 | 0.428293956 | 0.428293956 | -5.313434471 |
| 1432526_a_at | -0.054656192 | 9.441697418 | -0.827767188 | 0.428307972 | 0.428307972 | -5.313453704 |
| 1437286_x_at | -0.08954131  | 4.440170673 | -0.827739183 | 0.428323065 | 0.428323065 | -5.313474413 |
| 1436655_at   | -0.12873255  | 4.696545976 | -0.827737706 | 0.428323861 | 0.428323861 | -5.313475505 |
| 1417818_at   | 0.057793018  | 10.18530631 | 0.827643541  | 0.428374612 | 0.428374612 | -5.313545133 |

|              |              |             |              |             |             |              |
|--------------|--------------|-------------|--------------|-------------|-------------|--------------|
| 1426444_at   | -0.076936017 | 7.172676616 | -0.827564442 | 0.428417246 | 0.428417246 | -5.313603615 |
| 1416356_at   | 0.053496267  | 8.866120385 | 0.82752649   | 0.428437704 | 0.428437704 | -5.313631674 |
| 1424490_at   | 0.069320352  | 8.070874947 | 0.827510902  | 0.428446106 | 0.428446106 | -5.313643198 |
| 1435987_x_at | 0.073830679  | 3.822538143 | 0.827482605  | 0.428461359 | 0.428461359 | -5.313664118 |
| 1428259_at   | 0.072064045  | 11.0768704  | 0.827451456  | 0.42847815  | 0.42847815  | -5.313687144 |
| 1449866_at   | 0.064634389  | 3.929628201 | 0.827422456  | 0.428493784 | 0.428493784 | -5.313708583 |
| 1443323_at   | 0.061610938  | 4.981256125 | 0.827413171  | 0.428498789 | 0.428498789 | -5.313715446 |
| 1448063_at   | -0.070628947 | 6.90372912  | -0.827392131 | 0.428510131 | 0.428510131 | -5.313730999 |
| 1446610_at   | -0.062144472 | 4.025623004 | -0.827384652 | 0.428514163 | 0.428514163 | -5.313736527 |
| 1429625_at   | 0.07898157   | 7.107295627 | 0.827348641  | 0.428533577 | 0.428533577 | -5.313763146 |
| 1440685_at   | 0.080285456  | 5.688581606 | 0.827331445  | 0.428542848 | 0.428542848 | -5.313775856 |
| 1422365_at   | 0.068610774  | 3.770327264 | 0.827233594  | 0.428595604 | 0.428595604 | -5.31384818  |
| 1451886_at   | -0.088703032 | 4.80623538  | -0.82719384  | 0.428617038 | 0.428617038 | -5.313877561 |
| 1424868_at   | 0.072782953  | 4.041999183 | 0.827132683  | 0.428650014 | 0.428650014 | -5.313922758 |
| 1440517_x_at | 0.060762419  | 3.238361808 | 0.827094555  | 0.428670574 | 0.428670574 | -5.313950934 |
| 1453906_at   | -0.091422813 | 6.425411063 | -0.827092622 | 0.428671616 | 0.428671616 | -5.313952362 |
| 1423605_a_at | -0.057515073 | 9.252361305 | -0.827014528 | 0.428713728 | 0.428713728 | -5.314010069 |
| 1443578_at   | 0.090797484  | 3.9948719   | 0.826890195  | 0.42878078  | 0.42878078  | -5.314101935 |
| 1435602_at   | 0.056524334  | 8.553985144 | 0.826889524  | 0.428781143 | 0.428781143 | -5.314102431 |
| 1418404_at   | 0.061286596  | 8.31130042  | 0.826878486  | 0.428787096 | 0.428787096 | -5.314110586 |
| 1434139_at   | 0.05736985   | 8.025780433 | 0.82683136   | 0.428812513 | 0.428812513 | -5.314145402 |
| 1437937_at   | -0.065581292 | 4.756583687 | -0.826810368 | 0.428823835 | 0.428823835 | -5.31416091  |
| 1443783_x_at | 0.062082083  | 3.030552157 | 0.826790766  | 0.428834408 | 0.428834408 | -5.314175391 |
| 1439633_at   | -0.071240816 | 6.527922341 | -0.82672598  | 0.428869352 | 0.428869352 | -5.31422325  |
| 1457418_at   | 0.078186088  | 3.447245924 | 0.826702142  | 0.428882211 | 0.428882211 | -5.314240859 |
| 1440605_at   | 0.080321576  | 4.198016783 | 0.826688519  | 0.428889559 | 0.428889559 | -5.314250922 |
| 1429184_at   | -0.08886408  | 3.874996973 | -0.826629028 | 0.428921651 | 0.428921651 | -5.314294865 |
| 1454599_at   | -0.076348445 | 4.987713783 | -0.826437781 | 0.429024826 | 0.429024826 | -5.31443611  |
| 1440042_at   | -0.059991115 | 3.305247258 | -0.826409828 | 0.429039908 | 0.429039908 | -5.314456753 |
| 1423057_at   | -0.06173906  | 10.4769643  | -0.826332371 | 0.429081701 | 0.429081701 | -5.314513949 |
| 1439863_at   | 0.065426286  | 4.540461323 | 0.82633082   | 0.429082538 | 0.429082538 | -5.314515094 |
| 1439534_at   | 0.090629753  | 3.905900666 | 0.826314833  | 0.429091164 | 0.429091164 | -5.314526899 |
| 1445916_at   | -0.072199585 | 4.85997302  | -0.826313269 | 0.429092008 | 0.429092008 | -5.314528054 |
| 1456377_x_at | 0.081698267  | 11.53384084 | 0.826285921  | 0.429106765 | 0.429106765 | -5.314548247 |
| 1450395_at   | 0.05341001   | 8.625593045 | 0.826219224  | 0.429142756 | 0.429142756 | -5.314597492 |
| 1444705_at   | -0.060731259 | 8.046516226 | -0.826188506 | 0.429159333 | 0.429159333 | -5.314620171 |
| 1453719_at   | -0.061995464 | 5.17473248  | -0.826177977 | 0.429165015 | 0.429165015 | -5.314627945 |
| 1458507_at   | 0.112570038  | 5.142818696 | 0.826162752  | 0.429173231 | 0.429173231 | -5.314639185 |
| 1437330_at   | 0.061220438  | 4.982732528 | 0.82615008   | 0.42918007  | 0.42918007  | -5.31464854  |
| 1419711_at   | -0.075665111 | 5.271558175 | -0.826088507 | 0.429213299 | 0.429213299 | -5.314693995 |
| 1443555_at   | 0.073231159  | 3.969559198 | 0.826067432  | 0.429224674 | 0.429224674 | -5.314709553 |
| 1432421_at   | 0.102442591  | 6.392131792 | 0.826055522  | 0.429231102 | 0.429231102 | -5.314718345 |
| 1427818_at   | -0.053200319 | 4.039176376 | -0.826052844 | 0.429232547 | 0.429232547 | -5.314720322 |
| 1447549_x_at | -0.067612369 | 6.235973526 | -0.825846016 | 0.429344184 | 0.429344184 | -5.314872983 |
| 1429490_at   | -0.0752774   | 5.170983016 | -0.82584324  | 0.429345682 | 0.429345682 | -5.314875032 |
| 1453342_at   | 0.054733579  | 9.03762369  | 0.825831349  | 0.429352102 | 0.429352102 | -5.314883808 |
| 1416445_at   | -0.056490659 | 9.947856653 | -0.825829832 | 0.42935292  | 0.42935292  | -5.314884927 |
| 1427217_at   | 0.084093912  | 3.325351356 | 0.825828407  | 0.42935369  | 0.42935369  | -5.314885979 |
| 1429600_at   | 0.069625819  | 6.90597703  | 0.825820306  | 0.429358063 | 0.429358063 | -5.314891959 |
| 1415693_at   | -0.052103972 | 8.464804951 | -0.825797717 | 0.429370257 | 0.429370257 | -5.314908629 |
| 1453257_at   | -0.067477405 | 8.653724311 | -0.825748098 | 0.429397043 | 0.429397043 | -5.314945247 |
| 1420241_at   | -0.051066825 | 5.958695356 | -0.825721413 | 0.429411449 | 0.429411449 | -5.314964939 |
| 1422280_at   | -0.093632041 | 3.987139698 | -0.825705475 | 0.429420054 | 0.429420054 | -5.3149767   |

|              |              |             |              |             |             |              |
|--------------|--------------|-------------|--------------|-------------|-------------|--------------|
| 1460709_a_at | 0.076951901  | 8.918129221 | 0.825660498  | 0.429444336 | 0.429444336 | -5.315009888 |
| 1417794_at   | -0.067095999 | 8.573858832 | -0.825626372 | 0.42946276  | 0.42946276  | -5.315035069 |
| 1419081_at   | 0.062644043  | 6.369486222 | 0.825624444  | 0.429463801 | 0.429463801 | -5.315036492 |
| 1430905_at   | 0.088839701  | 4.250196671 | 0.825614247  | 0.429469307 | 0.429469307 | -5.315044016 |
| 1424557_at   | 0.054901818  | 8.644452144 | 0.825521463  | 0.429519404 | 0.429519404 | -5.315112474 |
| 1422969_s_at | -0.071109505 | 7.315838878 | -0.82550247  | 0.429529659 | 0.429529659 | -5.315126486 |
| 1422933_at   | 0.071620665  | 4.052945507 | 0.825454785  | 0.429555408 | 0.429555408 | -5.315161666 |
| 1442459_at   | -0.08784409  | 4.091727853 | -0.82541923  | 0.429574608 | 0.429574608 | -5.315187896 |
| 1418296_at   | 0.056245589  | 7.067881071 | 0.825399303  | 0.429585368 | 0.429585368 | -5.315202596 |
| 1458256_at   | -0.069280679 | 4.362501194 | -0.825337815 | 0.429618574 | 0.429618574 | -5.315247954 |
| 1446455_at   | 0.057415217  | 3.673383939 | 0.825226202  | 0.429678852 | 0.429678852 | -5.31533028  |
| 1439655_at   | 0.089914213  | 6.04389917  | 0.82520559   | 0.429689984 | 0.429689984 | -5.315345482 |
| 1417334_at   | 0.0613899    | 7.394037871 | 0.825120469  | 0.42973596  | 0.42973596  | -5.31540826  |
| 1433639_at   | 0.09108707   | 9.091469434 | 0.82502317   | 0.429788517 | 0.429788517 | -5.315480013 |
| 1419705_at   | -0.077145588 | 4.247154669 | -0.824940045 | 0.429833422 | 0.429833422 | -5.315541308 |
| 1434854_a_at | 0.06730523   | 12.60736352 | 0.824933536  | 0.429836938 | 0.429836938 | -5.315546107 |
| 1448636_at   | 0.052501858  | 3.494165358 | 0.824918975  | 0.429844804 | 0.429844804 | -5.315556843 |
| 1436199_at   | -0.094064726 | 5.690178436 | -0.824846585 | 0.429883913 | 0.429883913 | -5.315610216 |
| 1438637_x_at | 0.085385059  | 9.999000724 | 0.824581371  | 0.430027215 | 0.430027215 | -5.315805726 |
| 1449165_at   | 0.099614391  | 5.147788367 | 0.824581249  | 0.430027281 | 0.430027281 | -5.315805815 |
| 1421966_at   | 0.075942129  | 3.871987904 | 0.824531084  | 0.43005439  | 0.43005439  | -5.315842789 |
| 1420344_x_at | -0.054674158 | 2.997168435 | -0.824418298 | 0.430115344 | 0.430115344 | -5.315925912 |
| 1447595_x_at | 0.098703147  | 3.919919702 | 0.824354854  | 0.430149634 | 0.430149634 | -5.315972666 |
| 1433218_at   | -0.070813821 | 4.436190561 | -0.824296965 | 0.430180923 | 0.430180923 | -5.316015323 |
| 1441505_at   | -0.066249569 | 7.928875964 | -0.824201038 | 0.430232776 | 0.430232776 | -5.316086004 |
| 1436564_at   | 0.072994785  | 5.326299623 | 0.82413982   | 0.430265868 | 0.430265868 | -5.316131107 |
| 1451302_at   | 0.074367345  | 7.930120554 | 0.824104124  | 0.430285166 | 0.430285166 | -5.316157405 |
| 1440588_at   | 0.11206795   | 4.754702947 | 0.824086813  | 0.430294524 | 0.430294524 | -5.316170159 |
| 1456304_at   | -0.09055389  | 4.600169194 | -0.823971471 | 0.430356883 | 0.430356883 | -5.316255126 |
| 1422354_at   | -0.059412627 | 4.173831114 | -0.823962054 | 0.430361975 | 0.430361975 | -5.316262063 |
| 1417556_at   | -0.066781873 | 3.528781158 | -0.823942334 | 0.430372637 | 0.430372637 | -5.316276588 |
| 1440285_at   | -0.072790601 | 9.701858228 | -0.823918799 | 0.430385362 | 0.430385362 | -5.316293924 |
| 1453489_at   | -0.093234612 | 5.520769596 | -0.82388813  | 0.430401944 | 0.430401944 | -5.316316513 |
| 1433128_at   | -0.059474285 | 3.846978648 | -0.823856617 | 0.430418984 | 0.430418984 | -5.316339723 |
| 1453225_at   | 0.100958759  | 3.535685214 | 0.82384645   | 0.430424481 | 0.430424481 | -5.316347212 |
| 1442236_at   | 0.062151007  | 3.267704586 | 0.823844666  | 0.430425446 | 0.430425446 | -5.316348525 |
| 1455894_at   | -0.053874157 | 8.017107162 | -0.823809966 | 0.43044421  | 0.43044421  | -5.316374083 |
| 1452272_a_at | -0.058106715 | 8.393201923 | -0.823794341 | 0.430452659 | 0.430452659 | -5.31638559  |
| 1450467_at   | 0.064263627  | 5.785614517 | 0.823729031  | 0.430487976 | 0.430487976 | -5.316433688 |
| 1453988_a_at | 0.066265763  | 7.83612343  | 0.823712081  | 0.430497142 | 0.430497142 | -5.31644617  |
| 1418574_a_at | 0.117415661  | 10.74625469 | 0.823534076  | 0.430593412 | 0.430593412 | -5.316577244 |
| 1433607_at   | 0.128356869  | 4.354121608 | 0.823532795  | 0.430594105 | 0.430594105 | -5.316578187 |
| 1432751_at   | -0.058022754 | 3.427822607 | -0.823532006 | 0.430594532 | 0.430594532 | -5.316578768 |
| 1430548_at   | 0.067698169  | 4.110786811 | 0.823438884  | 0.430644901 | 0.430644901 | -5.316647328 |
| 1456856_at   | -0.076914722 | 4.127085455 | -0.823400322 | 0.43066576  | 0.43066576  | -5.316675717 |
| 1437041_at   | 0.076426517  | 9.984464974 | 0.823381011  | 0.430676206 | 0.430676206 | -5.316689934 |
| 1446391_at   | -0.055644955 | 3.729037623 | -0.823302843 | 0.430718492 | 0.430718492 | -5.316747476 |
| 1421794_at   | -0.052589528 | 3.177590888 | -0.823286127 | 0.430727534 | 0.430727534 | -5.31675978  |
| 1444862_at   | -0.081795878 | 4.447104238 | -0.823269917 | 0.430736304 | 0.430736304 | -5.316771712 |
| 1449675_at   | 0.09516956   | 4.611866001 | 0.823228061  | 0.430758948 | 0.430758948 | -5.316802521 |
| 1431701_a_at | -0.074498397 | 4.507734772 | -0.82322219  | 0.430762124 | 0.430762124 | -5.316806842 |
| 1421500_at   | -0.074037594 | 7.020359942 | -0.823218116 | 0.430764329 | 0.430764329 | -5.316809841 |
| 1435608_at   | -0.049992459 | 7.776798351 | -0.823129419 | 0.430812316 | 0.430812316 | -5.316875122 |

|              |              |             |              |             |             |              |
|--------------|--------------|-------------|--------------|-------------|-------------|--------------|
| 1435801_at   | 0.058492777  | 8.160367494 | 0.823064966  | 0.43084719  | 0.43084719  | -5.316922557 |
| 1437941_at   | -0.086165654 | 5.03072742  | -0.823063839 | 0.4308478   | 0.4308478   | -5.316923386 |
| 1423032_at   | 0.05991745   | 7.323432458 | 0.823055845  | 0.430852125 | 0.430852125 | -5.316929269 |
| 1427689_a_at | 0.064656175  | 8.768604989 | 0.823042699  | 0.430859239 | 0.430859239 | -5.316938944 |
| 1424610_at   | 0.13686776   | 7.381857514 | 0.823029183  | 0.430866552 | 0.430866552 | -5.31694889  |
| 1455600_at   | 0.050695061  | 9.211360381 | 0.823020687  | 0.430871149 | 0.430871149 | -5.316955142 |
| 1422789_at   | 0.206049953  | 8.933588063 | 0.822971917  | 0.430897539 | 0.430897539 | -5.31699103  |
| 1459784_x_at | -0.061376797 | 8.25945095  | -0.822913228 | 0.430929298 | 0.430929298 | -5.317034216 |
| 1443439_at   | 0.055314558  | 3.658724824 | 0.822908665  | 0.430931768 | 0.430931768 | -5.317037573 |
| 1438511_a_at | 0.117281254  | 6.668862318 | 0.822901949  | 0.430935402 | 0.430935402 | -5.317042515 |
| 1447723_at   | 0.091872977  | 3.950838204 | 0.822894972  | 0.430939178 | 0.430939178 | -5.317047648 |
| 1420202_at   | -0.084557604 | 3.25415306  | -0.822893481 | 0.430939985 | 0.430939985 | -5.317048746 |
| 1448913_at   | -0.075990764 | 7.436495581 | -0.822868849 | 0.430953315 | 0.430953315 | -5.317066869 |
| 1457323_at   | 0.05952211   | 3.439254673 | 0.822809777  | 0.430985284 | 0.430985284 | -5.317110332 |
| 1460647_a_at | 0.072589455  | 7.855457876 | 0.82278546   | 0.430998445 | 0.430998445 | -5.317128223 |
| 1453599_at   | -0.061360314 | 4.02274167  | -0.822734307 | 0.43102613  | 0.43102613  | -5.317165855 |
| 1418907_at   | -0.058485397 | 3.643731406 | -0.822732266 | 0.431027234 | 0.431027234 | -5.317167357 |
| 1431809_at   | -0.087129924 | 3.695147678 | -0.822676213 | 0.431057573 | 0.431057573 | -5.317208593 |
| 1456914_at   | 0.090912351  | 8.501587602 | 0.822543952  | 0.431129165 | 0.431129165 | -5.317305881 |
| 1438049_at   | -0.13365565  | 10.27417193 | -0.822474071 | 0.431166995 | 0.431166995 | -5.317357279 |
| 1453568_at   | 0.086161788  | 7.93612173  | 0.822444594  | 0.431182952 | 0.431182952 | -5.317378958 |
| 1429082_at   | 0.056866608  | 8.026744331 | 0.822444093  | 0.431183224 | 0.431183224 | -5.317379326 |
| 1458231_at   | 0.063071419  | 3.08867865  | 0.822433019  | 0.431189219 | 0.431189219 | -5.317387471 |
| 1421782_a_at | -0.081393337 | 3.531047543 | -0.822387913 | 0.431213638 | 0.431213638 | -5.317420643 |
| 1419198_at   | 0.063079733  | 5.926257744 | 0.822369856  | 0.431223415 | 0.431223415 | -5.317433922 |
| 1459911_at   | -0.074722427 | 7.988499695 | -0.82226859  | 0.431278243 | 0.431278243 | -5.317508389 |
| 1424377_at   | 0.050119264  | 9.069777371 | 0.822241513  | 0.431292904 | 0.431292904 | -5.317528299 |
| 1455642_a_at | 0.140983169  | 6.114185166 | 0.822222943  | 0.431302959 | 0.431302959 | -5.317541954 |
| 1422381_at   | -0.063424626 | 4.019289591 | -0.822219891 | 0.431304611 | 0.431304611 | -5.317544198 |
| 1420756_at   | 0.07107402   | 4.741513759 | 0.822139993  | 0.431347876 | 0.431347876 | -5.317602943 |
| 1435895_at   | -0.095461647 | 6.891872958 | -0.822043575 | 0.431400089 | 0.431400089 | -5.317673828 |
| 1455211_a_at | -0.066013997 | 10.38307136 | -0.82198846  | 0.431429937 | 0.431429937 | -5.317714345 |
| 1435341_at   | -0.049480683 | 8.935140505 | -0.821949444 | 0.431451068 | 0.431451068 | -5.317743025 |
| 1423609_a_at | -0.083095231 | 8.770543583 | -0.821888904 | 0.431483857 | 0.431483857 | -5.317787526 |
| 1452281_at   | 0.12088767   | 7.768141843 | 0.821880792  | 0.431488251 | 0.431488251 | -5.317793488 |
| 1426718_at   | 0.082867436  | 9.624254997 | 0.821864427  | 0.431497115 | 0.431497115 | -5.317805517 |
| 1442199_at   | -0.075007706 | 5.445162349 | -0.82183719  | 0.431511867 | 0.431511867 | -5.317825536 |
| 1445087_at   | 0.087493023  | 3.309028342 | 0.821778023  | 0.431543916 | 0.431543916 | -5.317869022 |
| 1421042_at   | -0.075604769 | 7.639458638 | -0.821708486 | 0.431581583 | 0.431581583 | -5.317920126 |
| 1460477_at   | -0.073371473 | 4.311970272 | -0.82169506  | 0.431588856 | 0.431588856 | -5.317929993 |
| 1449838_at   | 0.055803105  | 3.03735462  | 0.821667458  | 0.431603809 | 0.431603809 | -5.317950277 |
| 1458738_at   | 0.06465235   | 4.423379128 | 0.821634567  | 0.431621627 | 0.431621627 | -5.317974447 |
| 1428341_at   | 0.063639905  | 8.464705088 | 0.821627347  | 0.431625538 | 0.431625538 | -5.317979752 |
| 1456854_at   | -0.086815687 | 5.979387508 | -0.821627192 | 0.431625623 | 0.431625623 | -5.317979867 |
| 1459744_at   | 0.060429469  | 3.798817503 | 0.821601288  | 0.431639656 | 0.431639656 | -5.317998902 |
| 1430627_at   | -0.05167104  | 5.008876609 | -0.821477291 | 0.431706836 | 0.431706836 | -5.318090011 |
| 1446830_at   | -0.072387528 | 3.454803981 | -0.821463933 | 0.431714074 | 0.431714074 | -5.318099825 |
| 1429521_at   | 0.069175976  | 8.46884142  | 0.821461204  | 0.431715552 | 0.431715552 | -5.31810183  |
| 1452257_at   | -0.072258255 | 7.977073544 | -0.821456843 | 0.431717915 | 0.431717915 | -5.318105034 |
| 1440687_at   | 0.087895432  | 4.937206242 | 0.821442801  | 0.431725523 | 0.431725523 | -5.318115351 |
| 1423178_at   | -0.078512215 | 3.339065017 | -0.82142609  | 0.431734578 | 0.431734578 | -5.318127628 |
| 1426393_a_at | -0.062466446 | 9.659269424 | -0.821387254 | 0.431755621 | 0.431755621 | -5.31815616  |
| 1446211_at   | -0.069855084 | 3.400881116 | -0.821332633 | 0.431785218 | 0.431785218 | -5.318196286 |

|              |              |             |              |             |             |              |
|--------------|--------------|-------------|--------------|-------------|-------------|--------------|
| 1458603_at   | 0.065233918  | 5.834393898 | 0.821275586  | 0.431816132 | 0.431816132 | -5.318238192 |
| 1445924_at   | -0.071509244 | 4.228067907 | -0.821219892 | 0.431846313 | 0.431846313 | -5.318279102 |
| 1456425_at   | 0.099431859  | 4.297465372 | 0.821207923  | 0.4318528   | 0.4318528   | -5.318287893 |
| 1427075_s_at | 0.113663847  | 7.429481814 | 0.821118315  | 0.431901364 | 0.431901364 | -5.318353708 |
| 1438204_at   | -0.05559362  | 5.204275073 | -0.821108562 | 0.43190665  | 0.43190665  | -5.318360872 |
| 1422017_s_at | 0.072910318  | 7.502974466 | 0.821079895  | 0.431922187 | 0.431922187 | -5.318381925 |
| 1456982_at   | -0.052770648 | 3.925040094 | -0.821068195 | 0.431928528 | 0.431928528 | -5.318390518 |
| 1442758_at   | 0.077614016  | 3.412875025 | 0.821062786  | 0.43193146  | 0.43193146  | -5.318394491 |
| 1420761_at   | -0.076807457 | 5.842797978 | -0.821043741 | 0.431941783 | 0.431941783 | -5.318408477 |
| 1438298_a_at | -0.056991821 | 3.583913374 | -0.820987051 | 0.43197251  | 0.43197251  | -5.318450109 |
| 1423283_at   | -0.054942015 | 9.842560172 | -0.820889557 | 0.432025358 | 0.432025358 | -5.3185217   |
| 1460342_s_at | 0.08844382   | 10.36875715 | 0.820879196  | 0.432030975 | 0.432030975 | -5.318529308 |
| 1427935_at   | 0.053833868  | 8.911761071 | 0.820860181  | 0.432041282 | 0.432041282 | -5.318543269 |
| 1450442_at   | 0.053922327  | 4.457357866 | 0.820847694  | 0.432048052 | 0.432048052 | -5.318552438 |
| 1430669_at   | -0.053405573 | 3.672625812 | -0.820817964 | 0.432064168 | 0.432064168 | -5.318574267 |
| 1455560_at   | -0.094494052 | 4.86947798  | -0.820785362 | 0.432081843 | 0.432081843 | -5.318598204 |
| 1454057_at   | -0.076910913 | 5.022389459 | -0.820691718 | 0.432132612 | 0.432132612 | -5.318666954 |
| 1457330_at   | -0.124590569 | 4.737023359 | -0.820650602 | 0.432154905 | 0.432154905 | -5.318697137 |
| 1430578_at   | 0.091836852  | 5.815603662 | 0.82063493   | 0.432163402 | 0.432163402 | -5.318708641 |
| 1431203_at   | 0.071899419  | 4.127770327 | 0.820627647  | 0.432167351 | 0.432167351 | -5.318713988 |
| 1455849_at   | -0.059313606 | 7.008105892 | -0.820608348 | 0.432177815 | 0.432177815 | -5.318728155 |
| 1450885_at   | -0.071845686 | 8.40394844  | -0.820592088 | 0.432186631 | 0.432186631 | -5.31874009  |
| 1456612_at   | 0.051812104  | 3.783058181 | 0.820524322  | 0.432223377 | 0.432223377 | -5.318789832 |
| 1444035_at   | -0.079550211 | 4.038753664 | -0.820513216 | 0.432229399 | 0.432229399 | -5.318797984 |
| 1452601_a_at | -0.07012409  | 7.742735234 | -0.82047     | 0.432252834 | 0.432252834 | -5.318829703 |
| 1441324_at   | 0.078973066  | 6.836192058 | 0.820446092  | 0.432265798 | 0.432265798 | -5.31884725  |
| 1420286_at   | -0.103902771 | 5.134219254 | -0.820385372 | 0.432298727 | 0.432298727 | -5.318891814 |
| 1418887_a_at | 0.113024534  | 8.39065214  | 0.820382117  | 0.432300493 | 0.432300493 | -5.318894203 |
| 1451603_at   | -0.056309849 | 5.708810066 | -0.820380058 | 0.432301609 | 0.432301609 | -5.318895713 |
| 1445519_at   | -0.095686804 | 6.139771208 | -0.820298085 | 0.432346066 | 0.432346066 | -5.31895587  |
| 1446703_at   | -0.078742348 | 3.6948404   | -0.820252415 | 0.432370836 | 0.432370836 | -5.318989383 |
| 1458734_at   | 0.077169274  | 3.552130649 | 0.82018223   | 0.432408904 | 0.432408904 | -5.319040882 |
| 1454188_at   | -0.068612267 | 3.912719622 | -0.82018188  | 0.432409093 | 0.432409093 | -5.319041139 |
| 1418950_at   | -0.082615018 | 4.820043768 | -0.820169903 | 0.43241559  | 0.43241559  | -5.319049927 |
| 1417690_at   | -0.055567983 | 9.288846486 | -0.820076368 | 0.432466327 | 0.432466327 | -5.319118553 |
| 1440629_at   | 0.133371758  | 3.94797025  | 0.819976031  | 0.432520758 | 0.432520758 | -5.319192162 |
| 1418711_at   | 0.093345295  | 8.744100795 | 0.819954027  | 0.432532695 | 0.432532695 | -5.319208304 |
| 1440052_at   | -0.099301018 | 8.200429792 | -0.819948062 | 0.432535931 | 0.432535931 | -5.31921268  |
| 1450280_a_at | -0.096027009 | 4.22841401  | -0.819945462 | 0.432537341 | 0.432537341 | -5.319214587 |
| 1456380_x_at | 0.050384753  | 10.62596097 | 0.819919828  | 0.432551249 | 0.432551249 | -5.319233391 |
| 1417917_at   | 0.094402588  | 4.323303826 | 0.819873973  | 0.432576127 | 0.432576127 | -5.319267027 |
| 1446408_at   | -0.111560458 | 3.542466916 | -0.819827819 | 0.432601168 | 0.432601168 | -5.31930088  |
| 1446399_at   | -0.052699177 | 3.703041022 | -0.819809576 | 0.432611066 | 0.432611066 | -5.31931426  |
| 1458614_at   | 0.081476985  | 4.41917657  | 0.819738474  | 0.432649646 | 0.432649646 | -5.319366408 |
| 1415745_a_at | 0.075494226  | 8.710805421 | 0.819729927  | 0.432654284 | 0.432654284 | -5.319372677 |
| 1432272_a_at | 0.10648942   | 5.0603991   | 0.81969007   | 0.432675911 | 0.432675911 | -5.319401907 |
| 1421332_at   | 0.086473108  | 5.382332906 | 0.819479547  | 0.432790159 | 0.432790159 | -5.319556281 |
| 1437541_at   | -0.087563653 | 5.683149222 | -0.819455318 | 0.432803309 | 0.432803309 | -5.319574045 |
| 1444907_at   | -0.064553552 | 3.427914287 | -0.81942618  | 0.432819123 | 0.432819123 | -5.319595408 |
| 1456574_at   | 0.081953458  | 4.426483805 | 0.819299475  | 0.432887897 | 0.432887897 | -5.319688297 |
| 1455242_at   | 0.083621947  | 9.117016568 | 0.819257379  | 0.432910748 | 0.432910748 | -5.319719156 |
| 1438059_at   | 0.07480019   | 4.16707936  | 0.819221911  | 0.432930001 | 0.432930001 | -5.319745155 |
| 1456011_x_at | -0.124839475 | 5.347410463 | -0.819181802 | 0.432951775 | 0.432951775 | -5.319774555 |

|              |              |             |              |             |             |              |
|--------------|--------------|-------------|--------------|-------------|-------------|--------------|
| 1437570_at   | 0.091573045  | 6.65309116  | 0.819161698  | 0.432962689 | 0.432962689 | -5.319789291 |
| 1421456_at   | 0.07266117   | 4.939759806 | 0.819132478  | 0.432978552 | 0.432978552 | -5.319810707 |
| 1454320_at   | 0.133719658  | 5.911569367 | 0.819085359  | 0.433004133 | 0.433004133 | -5.319845241 |
| 1434910_at   | 0.086411217  | 8.527184492 | 0.819068595  | 0.433013234 | 0.433013234 | -5.319857528 |
| 1452002_at   | 0.06044631   | 7.515671995 | 0.81900164   | 0.433049587 | 0.433049587 | -5.319906597 |
| 1459160_at   | -0.06488956  | 3.695785416 | -0.818986353 | 0.433057887 | 0.433057887 | -5.3199178   |
| 1441848_at   | 0.067807524  | 7.778177342 | 0.818912011  | 0.433098252 | 0.433098252 | -5.319972278 |
| 1421998_at   | 0.072801204  | 4.597706024 | 0.818895814  | 0.433107048 | 0.433107048 | -5.319984147 |
| 1442634_at   | -0.072553479 | 4.014979852 | -0.818889205 | 0.433110636 | 0.433110636 | -5.319988989 |
| 1450997_at   | -0.095514831 | 7.762207754 | -0.818868672 | 0.433121786 | 0.433121786 | -5.320004035 |
| 1419631_at   | -0.114709564 | 5.229473892 | -0.818818858 | 0.433148836 | 0.433148836 | -5.320040535 |
| 1454038_at   | -0.055644541 | 3.428781983 | -0.8187154   | 0.43320502  | 0.43320502  | -5.320116335 |
| 1443621_at   | 0.329238079  | 5.590987826 | 0.818709093  | 0.433208445 | 0.433208445 | -5.320120955 |
| 1425888_at   | 0.078063982  | 3.697277236 | 0.818670404  | 0.433229457 | 0.433229457 | -5.320149299 |
| 1431243_at   | -0.073479506 | 4.063388219 | -0.81850994  | 0.433316611 | 0.433316611 | -5.320266843 |
| 1459902_at   | 0.133515956  | 6.848549009 | 0.818470527  | 0.43333802  | 0.43333802  | -5.320295711 |
| 1447195_at   | 0.069092024  | 5.913519495 | 0.818386612  | 0.433383604 | 0.433383604 | -5.320357171 |
| 1453741_x_at | 0.060898633  | 6.007247141 | 0.818215652  | 0.433476482 | 0.433476482 | -5.320482367 |
| 1426371_at   | 0.097786763  | 9.462683021 | 0.818188179  | 0.433491408 | 0.433491408 | -5.320502484 |
| 1426067_x_at | -0.055007168 | 6.028243526 | -0.818139014 | 0.433518121 | 0.433518121 | -5.320538482 |
| 1433924_at   | -0.05669328  | 12.38935193 | -0.818119713 | 0.433528608 | 0.433528608 | -5.320552614 |
| 1453632_at   | 0.063070792  | 3.920967962 | 0.818105761  | 0.43353619  | 0.43353619  | -5.32056283  |
| 1454063_at   | -0.062985593 | 3.993479365 | -0.818066847 | 0.433557335 | 0.433557335 | -5.32059132  |
| 1452653_at   | -0.082998164 | 8.529275517 | -0.818056146 | 0.433563149 | 0.433563149 | -5.320599155 |
| 1418230_a_at | 0.065933357  | 10.50182273 | 0.81803763   | 0.433573211 | 0.433573211 | -5.320612711 |
| 1454408_at   | -0.11066475  | 4.390024285 | -0.81799776  | 0.433594876 | 0.433594876 | -5.320641899 |
| 1442187_at   | 0.067384582  | 4.065041802 | 0.817973699  | 0.433607951 | 0.433607951 | -5.320659514 |
| 1454482_at   | 0.070612507  | 4.279211375 | 0.817954125  | 0.433618588 | 0.433618588 | -5.320673843 |
| 1416488_at   | 0.09285463   | 9.334598159 | 0.817935995  | 0.433628441 | 0.433628441 | -5.320687115 |
| 1451884_a_at | -0.063863581 | 7.945093226 | -0.817887649 | 0.433654714 | 0.433654714 | -5.320722504 |
| 1438424_at   | 0.05675196   | 6.554800394 | 0.817832692  | 0.433684582 | 0.433684582 | -5.320762731 |
| 1422243_at   | -0.066314715 | 7.892209557 | -0.817798205 | 0.433703326 | 0.433703326 | -5.320787974 |
| 1419558_at   | 0.068644629  | 6.49584333  | 0.817676216  | 0.43376963  | 0.43376963  | -5.320877255 |
| 1431493_at   | -0.07615561  | 4.034680538 | -0.817670665 | 0.433772648 | 0.433772648 | -5.320881317 |
| 1446460_at   | -0.092078916 | 4.440091138 | -0.817633112 | 0.43379306  | 0.43379306  | -5.320908799 |
| 1445116_at   | 0.1845996    | 4.58213056  | 0.817608639  | 0.433806364 | 0.433806364 | -5.320926708 |
| 1426816_at   | -0.056557071 | 5.890812785 | -0.817598762 | 0.433811733 | 0.433811733 | -5.320933937 |
| 1446092_at   | -0.086016378 | 4.335768262 | -0.817565783 | 0.433829661 | 0.433829661 | -5.320958069 |
| 1445197_x_at | -0.062622687 | 4.210099553 | -0.817513995 | 0.433857814 | 0.433857814 | -5.320995964 |
| 1424728_at   | 0.073718224  | 8.242594382 | 0.81745846   | 0.433888005 | 0.433888005 | -5.321036598 |
| 1448474_at   | 0.063499931  | 9.525200127 | 0.817434173  | 0.433901209 | 0.433901209 | -5.321054368 |
| 1422332_at   | 0.067335471  | 3.692368841 | 0.817430427  | 0.433903246 | 0.433903246 | -5.321057109 |
| 1443246_at   | 0.102965584  | 3.655764107 | 0.817362448  | 0.433940205 | 0.433940205 | -5.321106844 |
| 1440049_at   | -0.073224427 | 3.300314796 | -0.817341694 | 0.433951489 | 0.433951489 | -5.321122027 |
| 1421502_at   | -0.094400655 | 3.760264638 | -0.817282567 | 0.433983638 | 0.433983638 | -5.321165282 |
| 1426906_at   | -0.115709645 | 4.823466956 | -0.817218309 | 0.434018579 | 0.434018579 | -5.321212287 |
| 1442351_a_at | -0.068616698 | 6.184629307 | -0.817169841 | 0.434044935 | 0.434044935 | -5.32124774  |
| 1455733_at   | 0.072575586  | 6.679057945 | 0.817130563  | 0.434066294 | 0.434066294 | -5.321276469 |
| 1444560_at   | 0.111767349  | 5.568903626 | 0.817027934  | 0.434122107 | 0.434122107 | -5.32135153  |
| 1446996_at   | 0.058400247  | 6.049750133 | 0.816979316  | 0.434148549 | 0.434148549 | -5.321387086 |
| 1423724_at   | 0.054105028  | 10.53829768 | 0.816973522  | 0.4341517   | 0.4341517   | -5.321391323 |
| 1422226_at   | -0.085233087 | 4.491388975 | -0.816964399 | 0.434156662 | 0.434156662 | -5.321397995 |
| 1425389_a_at | -0.063304375 | 6.022216723 | -0.816948327 | 0.434165404 | 0.434165404 | -5.321409748 |



|              |              |             |              |             |             |              |
|--------------|--------------|-------------|--------------|-------------|-------------|--------------|
| 1444838_at   | 0.09593487   | 5.960455765 | 0.816930984  | 0.434174836 | 0.434174836 | -5.32142243  |
| 1434106_at   | 0.103358203  | 10.79005184 | 0.816927367  | 0.434176804 | 0.434176804 | -5.321425075 |
| 1427703_at   | 0.071709035  | 8.243189303 | 0.816840182  | 0.434224226 | 0.434224226 | -5.321488828 |
| 1441617_at   | 0.079607503  | 7.613643396 | 0.816836141  | 0.434226424 | 0.434226424 | -5.321491782 |
| 1424914_at   | -0.058359411 | 7.412913105 | -0.816738018 | 0.4342798   | 0.4342798   | -5.321563526 |
| 1446082_at   | -0.062664234 | 3.471473075 | -0.81672746  | 0.434285543 | 0.434285543 | -5.321571245 |
| 1442848_at   | -0.056022506 | 3.387030353 | -0.816668621 | 0.434317552 | 0.434317552 | -5.321614262 |
| 1436938_at   | 0.065563479  | 10.67383445 | 0.816615162  | 0.434346635 | 0.434346635 | -5.321653342 |
| 1455652_at   | 0.053804925  | 7.704345706 | 0.816584152  | 0.434363506 | 0.434363506 | -5.321676011 |
| 1426584_a_at | -0.060146998 | 8.161460636 | -0.816548778 | 0.434382752 | 0.434382752 | -5.321701869 |
| 1453133_at   | -0.177820062 | 3.550514041 | -0.816497464 | 0.434410672 | 0.434410672 | -5.321739377 |
| 1458691_at   | -0.054705722 | 5.139344489 | -0.816486251 | 0.434416773 | 0.434416773 | -5.321747574 |
| 1443750_s_at | 0.053302579  | 7.590299336 | 0.816436274  | 0.434443966 | 0.434443966 | -5.321784102 |
| 1450459_at   | -0.082519885 | 8.271829998 | -0.816432699 | 0.434445912 | 0.434445912 | -5.321786716 |
| 1457960_at   | -0.062603671 | 5.900955014 | -0.816394703 | 0.434466587 | 0.434466587 | -5.321814486 |
| 1435820_x_at | 0.079465061  | 7.575903805 | 0.81638924   | 0.434469559 | 0.434469559 | -5.321818478 |
| 1429836_at   | 0.095731381  | 5.286247121 | 0.816376379  | 0.434476558 | 0.434476558 | -5.321827878 |
| 1445500_at   | 0.09254162   | 5.204489415 | 0.816363946  | 0.434483323 | 0.434483323 | -5.321836964 |
| 1454901_at   | -0.061173977 | 7.202546488 | -0.816267535 | 0.434535789 | 0.434535789 | -5.321907422 |
| 1430298_at   | -0.113990162 | 4.493330939 | -0.816251911 | 0.434544291 | 0.434544291 | -5.321918838 |
| 1433764_at   | -0.055011778 | 6.432427941 | -0.816211566 | 0.434566248 | 0.434566248 | -5.32194832  |
| 1443474_at   | 0.06519188   | 4.51736793  | 0.81618642   | 0.434579934 | 0.434579934 | -5.321966695 |
| 1430779_at   | 0.091282467  | 7.670697993 | 0.816150621  | 0.434599417 | 0.434599417 | -5.321992853 |
| 1434949_at   | 0.143626034  | 7.050664276 | 0.816111013  | 0.434620975 | 0.434620975 | -5.322021793 |
| 1430236_s_at | -0.057671652 | 4.056690932 | -0.816095076 | 0.434629649 | 0.434629649 | -5.322033437 |
| 1455512_at   | 0.076732555  | 3.294265228 | 0.816071024  | 0.43464274  | 0.43464274  | -5.32205101  |
| 1423360_at   | -0.065007186 | 7.190898975 | -0.816068566 | 0.434644078 | 0.434644078 | -5.322052806 |
| 1441224_at   | -0.060249671 | 6.717113607 | -0.816050388 | 0.434653973 | 0.434653973 | -5.322066087 |
| 1451212_at   | -0.060455344 | 7.474930572 | -0.816037671 | 0.434660894 | 0.434660894 | -5.322075377 |
| 1447860_x_at | -0.062853588 | 7.63739957  | -0.816020741 | 0.43467011  | 0.43467011  | -5.322087746 |
| 1442560_at   | -0.061675546 | 4.659960975 | -0.815982502 | 0.434690924 | 0.434690924 | -5.322115681 |
| 1430495_at   | 0.084124868  | 3.828611989 | 0.815922675  | 0.434723491 | 0.434723491 | -5.322159386 |
| 1417666_at   | 0.052423389  | 9.438641454 | 0.815887395  | 0.434742697 | 0.434742697 | -5.322185158 |
| 1447789_x_at | 0.067666448  | 3.794063108 | 0.815885927  | 0.434743496 | 0.434743496 | -5.322186231 |
| 1449501_a_at | 0.081303065  | 5.41180878  | 0.815884538  | 0.434744252 | 0.434744252 | -5.322187245 |
| 1451948_at   | -0.057610103 | 3.303109388 | -0.815842334 | 0.434767228 | 0.434767228 | -5.322218074 |
| 1456274_at   | -0.080181778 | 5.903887061 | -0.81581229  | 0.434783583 | 0.434783583 | -5.322240018 |
| 1450362_at   | -0.060547505 | 3.106504615 | -0.81578903  | 0.434796247 | 0.434796247 | -5.322257007 |
| 1448530_at   | -0.087243107 | 7.280486995 | -0.815763389 | 0.434810207 | 0.434810207 | -5.322275736 |
| 1438914_at   | -0.060707173 | 3.738694719 | -0.815681146 | 0.434854984 | 0.434854984 | -5.322335801 |
| 1431329_at   | -0.080169343 | 4.727258513 | -0.815481399 | 0.434963751 | 0.434963751 | -5.322481664 |
| 1444497_at   | -0.059327785 | 4.287583013 | -0.815419439 | 0.434997493 | 0.434997493 | -5.322526905 |
| 1443870_at   | 0.089325918  | 6.761906179 | 0.815387336  | 0.435014976 | 0.435014976 | -5.322550343 |
| 1434551_at   | -0.053229148 | 9.79278907  | -0.815374642 | 0.43502189  | 0.43502189  | -5.32255961  |
| 1456108_x_at | -0.059650085 | 3.688489021 | -0.815357336 | 0.435031315 | 0.435031315 | -5.322572245 |
| 1452712_at   | 0.056323791  | 10.45475494 | 0.815342317  | 0.435039495 | 0.435039495 | -5.32258321  |
| 1446894_at   | -0.076694581 | 4.041615223 | -0.815340022 | 0.435040745 | 0.435040745 | -5.322584886 |
| 1448936_at   | 0.05072858   | 10.14610341 | 0.815324971  | 0.435048942 | 0.435048942 | -5.322595874 |
| 1440974_at   | 0.087250082  | 6.158692467 | 0.8151647    | 0.435136238 | 0.435136238 | -5.322712869 |
| 1427678_at   | -0.079456808 | 4.849433354 | -0.815163918 | 0.435136664 | 0.435136664 | -5.32271344  |
| 1452018_at   | -0.057781339 | 6.915160915 | -0.815104406 | 0.435169082 | 0.435169082 | -5.322756878 |
| 1425907_s_at | 0.06543704   | 5.576929411 | 0.815101357  | 0.435170743 | 0.435170743 | -5.322759103 |
| 1444204_at   | 0.096142961  | 4.663290702 | 0.815051273  | 0.435198026 | 0.435198026 | -5.322795657 |

|              |              |             |              |             |             |              |
|--------------|--------------|-------------|--------------|-------------|-------------|--------------|
| 1457328_at   | 0.072172205  | 3.735374997 | 0.81504251   | 0.435202799 | 0.435202799 | -5.322802052 |
| 1446717_at   | -0.066849382 | 4.103550398 | -0.814997704 | 0.435227209 | 0.435227209 | -5.322834752 |
| 1454762_at   | 0.115276237  | 4.219595431 | 0.81496074   | 0.435247347 | 0.435247347 | -5.322861728 |
| 1419985_s_at | 0.095545767  | 3.786046342 | 0.814926584  | 0.435265956 | 0.435265956 | -5.322886654 |
| 1446290_at   | 0.067178898  | 4.015063432 | 0.81491391   | 0.435272861 | 0.435272861 | -5.322895902 |
| 1438984_x_at | 0.091491773  | 10.89493256 | 0.814777499  | 0.435347185 | 0.435347185 | -5.322995439 |
| 1424227_at   | -0.081316291 | 7.961475698 | -0.814761321 | 0.435356001 | 0.435356001 | -5.323007242 |
| 1431558_at   | -0.063169488 | 3.778967194 | -0.814702849 | 0.435387863 | 0.435387863 | -5.323049904 |
| 1431910_at   | 0.071401628  | 4.75495041  | 0.814607431  | 0.43543986  | 0.43543986  | -5.323119514 |
| 1436855_at   | 0.0624296    | 7.54624327  | 0.814599172  | 0.435444362 | 0.435444362 | -5.323125539 |
| 1429019_s_at | 0.060195879  | 8.139105756 | 0.814588415  | 0.435450223 | 0.435450223 | -5.323133386 |
| 1445535_at   | 0.077408459  | 5.16342293  | 0.814548605  | 0.43547192  | 0.43547192  | -5.323162426 |
| 1453857_at   | -0.059676445 | 4.176568698 | -0.814541953 | 0.435475545 | 0.435475545 | -5.323167279 |
| 1426033_at   | 0.059243527  | 3.65123827  | 0.814534489  | 0.435479613 | 0.435479613 | -5.323172723 |
| 1419549_at   | 0.169967583  | 4.973761256 | 0.814475185  | 0.435511935 | 0.435511935 | -5.323215981 |
| 1420060_s_at | -0.050341412 | 3.452833395 | -0.814463112 | 0.435518515 | 0.435518515 | -5.323224787 |
| 1443622_at   | 0.053726292  | 4.909061045 | 0.814449912  | 0.435525709 | 0.435525709 | -5.323234415 |
| 1436278_at   | 0.082788623  | 6.683405581 | 0.814414706  | 0.435544898 | 0.435544898 | -5.323260092 |
| 1429254_at   | -0.057310497 | 4.016663714 | -0.814404791 | 0.435550302 | 0.435550302 | -5.323267324 |
| 1425917_at   | 0.084319113  | 3.355475927 | 0.814338672  | 0.435586342 | 0.435586342 | -5.323315546 |
| 1433936_at   | -0.052745481 | 8.343887937 | -0.814333351 | 0.435589243 | 0.435589243 | -5.323319427 |
| 1438655_a_at | 0.056198608  | 13.00560366 | 0.814316359  | 0.435598505 | 0.435598505 | -5.323331818 |
| 1447580_at   | -0.081661505 | 3.636611785 | -0.814261171 | 0.435628589 | 0.435628589 | -5.323372065 |
| 1459654_at   | -0.076345657 | 5.665346406 | -0.814175018 | 0.435675555 | 0.435675555 | -5.323434887 |
| 1451432_x_at | -0.063569036 | 6.73773097  | -0.814144238 | 0.435692335 | 0.435692335 | -5.323457331 |
| 1416262_at   | -0.072520402 | 7.945314788 | -0.814119983 | 0.435705559 | 0.435705559 | -5.323475016 |
| 1421631_at   | 0.080325707  | 3.825586712 | 0.813953356  | 0.435796409 | 0.435796409 | -5.323596498 |
| 1424349_a_at | 0.073878953  | 10.23544676 | 0.813921904  | 0.435813559 | 0.435813559 | -5.323619426 |
| 1420020_at   | 0.067964967  | 6.329514125 | 0.813909075  | 0.435820554 | 0.435820554 | -5.323628778 |
| 1455492_at   | -0.084782833 | 6.423212219 | -0.813829409 | 0.435863997 | 0.435863997 | -5.32368685  |
| 1447042_at   | 0.079726796  | 4.638468377 | 0.813798524  | 0.43588084  | 0.43588084  | -5.323709362 |
| 1457634_at   | 0.081221421  | 3.113135763 | 0.813787395  | 0.435886908 | 0.435886908 | -5.323717473 |
| 1440080_at   | -0.072211322 | 4.355235262 | -0.81373976  | 0.435912886 | 0.435912886 | -5.323752192 |
| 1419096_at   | 0.069087111  | 5.800871857 | 0.813726571  | 0.435920079 | 0.435920079 | -5.323761804 |
| 1437402_x_at | -0.056874076 | 9.127478676 | -0.813682568 | 0.435944077 | 0.435944077 | -5.323793874 |
| 1450138_a_at | 0.056585556  | 10.15913642 | 0.813676303  | 0.435947495 | 0.435947495 | -5.32379844  |
| 1453754_at   | 0.081476975  | 5.320792233 | 0.813662968  | 0.435954768 | 0.435954768 | -5.323808159 |
| 1418719_at   | -0.055976155 | 7.53823674  | -0.813646232 | 0.435963896 | 0.435963896 | -5.323820356 |
| 1432487_at   | -0.057386326 | 3.779722234 | -0.813585679 | 0.435996922 | 0.435996922 | -5.323864483 |
| 1425661_at   | -0.073953908 | 4.623022861 | -0.813518741 | 0.436033434 | 0.436033434 | -5.323913261 |
| 1437182_at   | 0.082215256  | 8.194328374 | 0.813454026  | 0.436068735 | 0.436068735 | -5.323960415 |
| 1432698_at   | -0.076608031 | 4.635512526 | -0.813372476 | 0.436113222 | 0.436113222 | -5.324019831 |
| 1447068_at   | -0.074863317 | 4.006785334 | -0.813295332 | 0.436155308 | 0.436155308 | -5.324076033 |
| 1421202_at   | 0.078206614  | 4.372777632 | 0.813250199  | 0.436179932 | 0.436179932 | -5.324108911 |
| 1423881_at   | -0.056360298 | 9.321512795 | -0.813203979 | 0.436205149 | 0.436205149 | -5.32414258  |
| 1426075_at   | -0.085001539 | 3.914340917 | -0.813184306 | 0.436215883 | 0.436215883 | -5.32415691  |
| 1445421_at   | 0.06429755   | 5.060832891 | 0.813135832  | 0.436242332 | 0.436242332 | -5.324192219 |
| 1431631_at   | -0.063549212 | 5.102015229 | -0.813118613 | 0.436251727 | 0.436251727 | -5.32420476  |
| 1458199_at   | 0.053560071  | 5.815945347 | 0.81305404   | 0.436286963 | 0.436286963 | -5.324251791 |
| 1444194_at   | 0.0723791    | 7.589325691 | 0.812998663  | 0.436317182 | 0.436317182 | -5.324292122 |
| 1432161_a_at | -0.05798245  | 3.817730845 | -0.812948877 | 0.436344351 | 0.436344351 | -5.324328379 |
| 1454046_x_at | -0.070326887 | 7.798806211 | -0.812912187 | 0.436364374 | 0.436364374 | -5.324355098 |
| 1442938_at   | -0.053168682 | 3.259603314 | -0.81291187  | 0.436364547 | 0.436364547 | -5.324355328 |

|              |              |             |              |             |             |              |
|--------------|--------------|-------------|--------------|-------------|-------------|--------------|
| 1419429_at   | 0.100906151  | 6.760775292 | 0.812899741  | 0.436371166 | 0.436371166 | -5.324364161 |
| 1441265_at   | -0.070859931 | 6.074931717 | -0.812828818 | 0.436409874 | 0.436409874 | -5.324415805 |
| 1460114_at   | -0.066155289 | 4.060669523 | -0.812710592 | 0.436474403 | 0.436474403 | -5.324501885 |
| 1445241_at   | -0.062251681 | 4.287635058 | -0.812603465 | 0.43653288  | 0.43653288  | -5.324579875 |
| 1453914_at   | -0.059461716 | 3.522688861 | -0.812590117 | 0.436540166 | 0.436540166 | -5.324589591 |
| 1444216_at   | -0.085744505 | 4.718243678 | -0.812557241 | 0.436558113 | 0.436558113 | -5.324613524 |
| 1441743_at   | -0.115224927 | 7.059812992 | -0.812464479 | 0.436608755 | 0.436608755 | -5.324681045 |
| 1445565_at   | 0.073742614  | 5.373843253 | 0.81244767   | 0.436617931 | 0.436617931 | -5.324693279 |
| 1439653_at   | -0.09022843  | 3.535149432 | -0.812431393 | 0.436626818 | 0.436626818 | -5.324705126 |
| 1455832_a_at | -0.059017466 | 8.595426375 | -0.812405348 | 0.436641038 | 0.436641038 | -5.324724083 |
| 1434796_at   | 0.063354135  | 8.870753781 | 0.812400933  | 0.436643449 | 0.436643449 | -5.324727296 |
| 1422719_s_at | 0.052472218  | 7.98537273  | 0.81236206   | 0.436664673 | 0.436664673 | -5.324755588 |
| 1419031_at   | -0.07667278  | 8.565308337 | -0.812301952 | 0.436697492 | 0.436697492 | -5.324799333 |
| 1436288_at   | -0.056362033 | 5.241652171 | -0.812259284 | 0.436720791 | 0.436720791 | -5.324830383 |
| 1441491_at   | 0.094473674  | 5.867456132 | 0.81225806   | 0.436721459 | 0.436721459 | -5.324831274 |
| 1439580_at   | -0.126557136 | 6.494791879 | -0.812252505 | 0.436724492 | 0.436724492 | -5.324835316 |
| 1447321_at   | -0.063128218 | 5.718919033 | -0.81223406  | 0.436734564 | 0.436734564 | -5.324848738 |
| 1416140_a_at | 0.068880465  | 9.907344767 | 0.812187158  | 0.436760176 | 0.436760176 | -5.324882868 |
| 1445523_at   | 0.062909581  | 3.695717055 | 0.812086314  | 0.436815247 | 0.436815247 | -5.324956244 |
| 1448962_at   | 0.069849674  | 5.718575263 | 0.812067151  | 0.436825713 | 0.436825713 | -5.324970186 |
| 1455239_at   | 0.076588054  | 4.655035771 | 0.811968341  | 0.436879678 | 0.436879678 | -5.325042073 |
| 1417526_at   | 0.092580614  | 8.602238125 | 0.811843931  | 0.436947632 | 0.436947632 | -5.325132573 |
| 1433774_x_at | 0.086357138  | 6.684669506 | 0.811817108  | 0.436962284 | 0.436962284 | -5.325152084 |
| 1459203_at   | 0.094394634  | 5.53674035  | 0.811688776  | 0.437032389 | 0.437032389 | -5.325245423 |
| 1416474_at   | -0.069567766 | 10.09979517 | -0.811673713 | 0.437040618 | 0.437040618 | -5.325256377 |
| 1443764_x_at | 0.069378633  | 6.138396188 | 0.81166109   | 0.437047514 | 0.437047514 | -5.325265558 |
| 1417104_at   | -0.064319366 | 10.19651501 | -0.811639875 | 0.437059104 | 0.437059104 | -5.325280986 |
| 1420500_at   | -0.056557339 | 8.424540757 | -0.811618605 | 0.437070725 | 0.437070725 | -5.325296454 |
| 1435085_at   | 0.066970379  | 5.393704992 | 0.811512562  | 0.437128662 | 0.437128662 | -5.325373566 |
| 1439544_at   | -0.073035874 | 3.711074746 | -0.811510248 | 0.437129927 | 0.437129927 | -5.325375249 |
| 1460169_a_at | -0.087327047 | 9.30555572  | -0.811429459 | 0.437174071 | 0.437174071 | -5.325433992 |
| 1452549_at   | -0.069754278 | 3.398855619 | -0.811401328 | 0.437189442 | 0.437189442 | -5.325454444 |
| 1442649_at   | -0.083209985 | 4.374632831 | -0.811342276 | 0.437221711 | 0.437221711 | -5.325497377 |
| 1429398_at   | -0.054868316 | 3.343011181 | -0.81134192  | 0.437221906 | 0.437221906 | -5.325497636 |
| 1450739_at   | -0.054472018 | 7.174303559 | -0.811331445 | 0.43722763  | 0.43722763  | -5.325505251 |
| 1441859_x_at | -0.076214353 | 3.097223401 | -0.811321325 | 0.43723316  | 0.43723316  | -5.325512608 |
| 1459333_at   | -0.05834371  | 3.779250138 | -0.811249501 | 0.437272412 | 0.437272412 | -5.325564822 |
| 1432305_at   | 0.085739011  | 3.61283133  | 0.811216093  | 0.43729067  | 0.43729067  | -5.325589107 |
| 1452977_at   | -0.069406581 | 6.869022215 | -0.811200965 | 0.437298938 | 0.437298938 | -5.325600104 |
| 1456293_s_at | 0.07618368   | 9.934038828 | 0.811199363  | 0.437299813 | 0.437299813 | -5.325601268 |
| 1445128_at   | -0.078764874 | 6.265658827 | -0.811167683 | 0.437317128 | 0.437317128 | -5.325624296 |
| 1441250_at   | 0.061057755  | 3.514545266 | 0.811133961  | 0.437335558 | 0.437335558 | -5.325648807 |
| 1452960_at   | 0.08939555   | 7.438606969 | 0.811131569  | 0.437336866 | 0.437336866 | -5.325650546 |
| 1444023_at   | 0.060468553  | 3.381704523 | 0.811080286  | 0.437364896 | 0.437364896 | -5.32568782  |
| 1429242_at   | 0.078441411  | 7.253650756 | 0.811041497  | 0.437386098 | 0.437386098 | -5.325716012 |
| 1424807_at   | -0.061161464 | 10.03808387 | -0.811014657 | 0.437400769 | 0.437400769 | -5.325735518 |
| 1460176_at   | 0.057994151  | 5.927089232 | 0.810986585  | 0.437416113 | 0.437416113 | -5.325755919 |
| 1460247_a_at | 0.051350317  | 9.504598907 | 0.810985514  | 0.437416699 | 0.437416699 | -5.325756698 |
| 1450836_at   | 0.080856481  | 4.743589103 | 0.81097767   | 0.437420986 | 0.437420986 | -5.325762398 |
| 1431062_a_at | 0.09051537   | 7.383799835 | 0.810863517  | 0.437483389 | 0.437483389 | -5.325845352 |
| 1453064_at   | 0.085023831  | 7.601900048 | 0.810839923  | 0.437496288 | 0.437496288 | -5.325862496 |
| 1434805_at   | -0.095512956 | 8.096136407 | -0.810836462 | 0.43749818  | 0.43749818  | -5.325865011 |
| 1457841_at   | 0.049217219  | 3.256086431 | 0.810759233  | 0.437540403 | 0.437540403 | -5.325921125 |

|              |              |             |              |             |             |              |
|--------------|--------------|-------------|--------------|-------------|-------------|--------------|
| 1454972_at   | -0.082968811 | 5.022567489 | -0.810716127 | 0.43756397  | 0.43756397  | -5.325952443 |
| 1440424_at   | -0.081645535 | 4.388545534 | -0.810699181 | 0.437573236 | 0.437573236 | -5.325964755 |
| 1437507_at   | 0.052056341  | 7.734417231 | 0.810697926  | 0.437573922 | 0.437573922 | -5.325965667 |
| 1424572_a_at | 0.078391529  | 11.07900615 | 0.810693508  | 0.437576337 | 0.437576337 | -5.325968877 |
| 1441127_at   | -0.072230533 | 3.92307409  | -0.810658106 | 0.437595694 | 0.437595694 | -5.325994597 |
| 1417594_at   | -0.072616701 | 8.846514107 | -0.810574792 | 0.43764125  | 0.43764125  | -5.32605512  |
| 1454518_at   | -0.07401664  | 5.329255141 | -0.810561225 | 0.437648669 | 0.437648669 | -5.326064976 |
| 1431481_at   | 0.057616645  | 4.556515382 | 0.810467208  | 0.437700082 | 0.437700082 | -5.326133267 |
| 1440635_at   | -0.082634233 | 9.95914481  | -0.810394289 | 0.43773996  | 0.43773996  | -5.32618623  |
| 1423061_at   | 0.069109107  | 5.84705809  | 0.810375028  | 0.437750494 | 0.437750494 | -5.326200218 |
| 1445869_at   | -0.087379824 | 4.1678517   | -0.81032354  | 0.437778654 | 0.437778654 | -5.326237612 |
| 1441791_at   | 0.066181862  | 3.745071373 | 0.81031538   | 0.437783117 | 0.437783117 | -5.326243537 |
| 1458512_at   | -0.072232631 | 7.137756953 | -0.810313176 | 0.437784322 | 0.437784322 | -5.326245138 |
| 1416092_a_at | -0.09357455  | 8.861317406 | -0.810277121 | 0.437804042 | 0.437804042 | -5.326271321 |
| 1452565_x_at | -0.062471937 | 3.276269496 | -0.810186797 | 0.437853447 | 0.437853447 | -5.326336911 |
| 1435996_at   | -0.057053716 | 3.874625088 | -0.810182731 | 0.437855671 | 0.437855671 | -5.326339864 |
| 1419700_a_at | 0.094221039  | 8.682245121 | 0.810093239  | 0.437904625 | 0.437904625 | -5.326404843 |
| 1437301_a_at | -0.092750355 | 9.457957751 | -0.810087638 | 0.437907689 | 0.437907689 | -5.326408909 |
| 1453574_at   | -0.052947146 | 4.145193829 | -0.810056017 | 0.437924987 | 0.437924987 | -5.326431868 |
| 1426463_at   | 0.053516597  | 7.682518855 | 0.809957346  | 0.437978968 | 0.437978968 | -5.326503501 |
| 1429297_at   | 0.058617313  | 3.218645565 | 0.809951431  | 0.437982204 | 0.437982204 | -5.326507796 |
| 1452373_at   | -0.07294908  | 9.362354707 | -0.809944563 | 0.437985962 | 0.437985962 | -5.326512782 |
| 1451817_at   | 0.057146209  | 6.616581043 | 0.809925644  | 0.437996312 | 0.437996312 | -5.326526515 |
| 1459956_at   | 0.068190349  | 4.263197034 | 0.809893793  | 0.438013738 | 0.438013738 | -5.326549637 |
| 1419831_at   | -0.067436682 | 3.598323227 | -0.809853154 | 0.438035974 | 0.438035974 | -5.326579136 |
| 1426651_at   | 0.064449836  | 7.900663482 | 0.809816478  | 0.438056041 | 0.438056041 | -5.326605758 |
| 1447960_at   | -0.092195652 | 3.744002156 | -0.80979541  | 0.438067569 | 0.438067569 | -5.326621049 |
| 1429777_at   | -0.060981184 | 5.876875027 | -0.809794804 | 0.438067901 | 0.438067901 | -5.326621489 |
| 1426683_at   | 0.052896494  | 9.706745146 | 0.809734488  | 0.438100905 | 0.438100905 | -5.326665267 |
| 1453053_at   | 0.099927433  | 6.274174821 | 0.809684268  | 0.438128386 | 0.438128386 | -5.326701715 |
| 1456279_a_at | -0.073194167 | 10.1135571  | -0.809619932 | 0.438163593 | 0.438163593 | -5.326748405 |
| 1426698_a_at | 0.05628876   | 10.2491269  | 0.80959933   | 0.438174868 | 0.438174868 | -5.326763355 |
| 1452196_a_at | 0.062176915  | 11.17265693 | 0.809579962  | 0.438185468 | 0.438185468 | -5.32677741  |
| 1432369_at   | 0.066701527  | 4.96520377  | 0.809525329  | 0.438215367 | 0.438215367 | -5.326817054 |
| 1427004_at   | 0.092974284  | 4.300504087 | 0.809498137  | 0.438230249 | 0.438230249 | -5.326836784 |
| 1430085_at   | 0.065093529  | 3.575660989 | 0.809412834  | 0.438276938 | 0.438276938 | -5.326898678 |
| 1427882_at   | 0.062176381  | 7.929776118 | 0.809384127  | 0.438292651 | 0.438292651 | -5.326919505 |
| 1447531_x_at | -0.081685579 | 5.154320911 | -0.809381833 | 0.438293907 | 0.438293907 | -5.32692117  |
| 1415724_a_at | 0.06606409   | 11.07729966 | 0.809359492  | 0.438306136 | 0.438306136 | -5.326937378 |
| 1442290_at   | -0.113404941 | 5.063282324 | -0.80935758  | 0.438307182 | 0.438307182 | -5.326938765 |
| 1437535_at   | 0.074594311  | 3.969825204 | 0.809317096  | 0.438329343 | 0.438329343 | -5.326968136 |
| 1453989_at   | 0.073511675  | 5.847379188 | 0.809311987  | 0.438332139 | 0.438332139 | -5.326971842 |
| 1426396_at   | 0.090893554  | 4.122045843 | 0.809282677  | 0.438348184 | 0.438348184 | -5.326993105 |
| 1452827_at   | -0.054549822 | 4.262771059 | -0.80926674  | 0.438356908 | 0.438356908 | -5.327004666 |
| 1429683_at   | -0.073235255 | 6.588308519 | -0.809265619 | 0.438357522 | 0.438357522 | -5.327005479 |
| 1433874_at   | -0.094209577 | 7.306178205 | -0.809182293 | 0.438403137 | 0.438403137 | -5.327065924 |
| 1450539_at   | -0.066449167 | 4.980645644 | -0.809157512 | 0.438416704 | 0.438416704 | -5.327083898 |
| 1430854_at   | 0.060243977  | 3.800011256 | 0.80912886   | 0.43843239  | 0.43843239  | -5.327104681 |
| 1432462_a_at | -0.064208528 | 7.954531361 | -0.809059097 | 0.438470585 | 0.438470585 | -5.327155279 |
| 1459215_at   | -0.068663658 | 4.899534888 | -0.809048762 | 0.438476244 | 0.438476244 | -5.327162775 |
| 1443856_at   | 0.068763471  | 7.191971029 | 0.809006217  | 0.438499538 | 0.438499538 | -5.32719363  |
| 1426194_x_at | 0.094286329  | 4.548769782 | 0.808968068  | 0.438520427 | 0.438520427 | -5.327221296 |
| 1427657_at   | -0.083469487 | 5.446719989 | -0.808930202 | 0.438541161 | 0.438541161 | -5.327248756 |

|              |              |             |              |             |             |              |
|--------------|--------------|-------------|--------------|-------------|-------------|--------------|
| 1432723_at   | -0.060319856 | 3.822532739 | -0.808905213 | 0.438554844 | 0.438554844 | -5.327266876 |
| 1439513_at   | -0.080838964 | 4.008280629 | -0.808700406 | 0.438667002 | 0.438667002 | -5.327415376 |
| 1451220_at   | 0.087168473  | 8.140449468 | 0.808692637  | 0.438671257 | 0.438671257 | -5.327421008 |
| 1435678_at   | -0.096656353 | 7.950207258 | -0.808680311 | 0.438678008 | 0.438678008 | -5.327429944 |
| 1443183_at   | 0.104374875  | 4.313368591 | 0.808661544  | 0.438688287 | 0.438688287 | -5.32744355  |
| 1457690_at   | -0.055401006 | 4.13533568  | -0.808640729 | 0.438699687 | 0.438699687 | -5.32745864  |
| 1431427_at   | -0.059779531 | 3.577376024 | -0.808583958 | 0.438730781 | 0.438730781 | -5.327499795 |
| 1434176_x_at | -0.052389215 | 9.420168816 | -0.808482285 | 0.438786473 | 0.438786473 | -5.327573494 |
| 1434637_x_at | -0.063281958 | 9.91292681  | -0.808478865 | 0.438788346 | 0.438788346 | -5.327575973 |
| 1437279_x_at | 0.078364318  | 9.762321135 | 0.808446239  | 0.438806218 | 0.438806218 | -5.32759962  |
| 1433789_at   | -0.115307921 | 8.083026357 | -0.808336694 | 0.438866229 | 0.438866229 | -5.327679013 |
| 1438939_x_at | -0.081529638 | 3.958261358 | -0.808306824 | 0.438882593 | 0.438882593 | -5.327700661 |
| 1460426_at   | 0.142328421  | 5.861835163 | 0.808274515  | 0.438900294 | 0.438900294 | -5.327724074 |
| 1448586_at   | 0.057066726  | 9.245895612 | 0.808253807  | 0.43891164  | 0.43891164  | -5.32773908  |
| 1446113_at   | 0.075414353  | 4.33150907  | 0.808250518  | 0.438913442 | 0.438913442 | -5.327741464 |
| 1455388_at   | 0.08927523   | 8.660017893 | 0.808166296  | 0.438959587 | 0.438959587 | -5.327802492 |
| 1442595_at   | -0.073412293 | 4.241852163 | -0.808163371 | 0.43896119  | 0.43896119  | -5.327804612 |
| 1457136_at   | 0.077094243  | 4.091368038 | 0.808132855  | 0.43897791  | 0.43897791  | -5.327826722 |
| 1421249_at   | -0.092951376 | 3.975025882 | -0.808118568 | 0.438985739 | 0.438985739 | -5.327837074 |
| 1423412_at   | -0.057569676 | 3.422861372 | -0.808094971 | 0.438998668 | 0.438998668 | -5.327854171 |
| 1435288_at   | 0.086918568  | 3.641076252 | 0.808094888  | 0.438998714 | 0.438998714 | -5.327854231 |
| 1436590_at   | 0.063893499  | 10.17732098 | 0.808017827  | 0.439040941 | 0.439040941 | -5.327910062 |
| 1445579_at   | -0.049999963 | 5.358800375 | -0.808013206 | 0.439043473 | 0.439043473 | -5.327913409 |
| 1455715_at   | 0.074251578  | 5.431341055 | 0.807974396  | 0.439064741 | 0.439064741 | -5.327941525 |
| 1415777_at   | 0.059985106  | 4.061344366 | 0.807949461  | 0.439078406 | 0.439078406 | -5.327959589 |
| 1442833_at   | 0.085115482  | 4.071633898 | 0.807934615  | 0.439086542 | 0.439086542 | -5.327970344 |
| 1455155_at   | -0.069558737 | 8.604050208 | -0.807913309 | 0.439098218 | 0.439098218 | -5.327985777 |
| 1449658_at   | -0.053276745 | 3.320007804 | -0.807874737 | 0.439119358 | 0.439119358 | -5.328013718 |
| 1437102_at   | -0.077782619 | 9.049773577 | -0.807847578 | 0.439134243 | 0.439134243 | -5.328033391 |
| 1442963_at   | -0.094264737 | 5.350525411 | -0.807824794 | 0.43914673  | 0.43914673  | -5.328049894 |
| 1441974_at   | 0.068793228  | 3.92233565  | 0.807818131  | 0.439150382 | 0.439150382 | -5.32805472  |
| 1456214_at   | -0.09241937  | 7.604080441 | -0.807817283 | 0.439150847 | 0.439150847 | -5.328055334 |
| 1427324_at   | -0.073442737 | 6.457662255 | -0.80781339  | 0.43915298  | 0.43915298  | -5.328058154 |
| 1446295_at   | 0.136389343  | 5.833366826 | 0.807812593  | 0.439153417 | 0.439153417 | -5.328058731 |
| 1418057_at   | 0.087785049  | 8.588100927 | 0.807809531  | 0.439155095 | 0.439155095 | -5.328060949 |
| 1430666_at   | 0.079935661  | 4.333750516 | 0.807769328  | 0.43917713  | 0.43917713  | -5.328090068 |
| 1447301_at   | 0.060300933  | 3.303998426 | 0.807755085  | 0.439184937 | 0.439184937 | -5.328100384 |
| 1458723_at   | -0.0670301   | 3.789666696 | -0.80775429  | 0.439185373 | 0.439185373 | -5.328100959 |
| 1440823_x_at | -0.065103452 | 7.330718396 | -0.807661426 | 0.439236274 | 0.439236274 | -5.328168215 |
| 1419069_at   | -0.085548368 | 5.441750066 | -0.807638981 | 0.439248578 | 0.439248578 | -5.328184469 |
| 1433931_at   | -0.088271808 | 8.556665323 | -0.807467467 | 0.439342602 | 0.439342602 | -5.328308665 |
| 1431472_at   | 0.06464773   | 3.708452562 | 0.807412582  | 0.439372693 | 0.439372693 | -5.328348403 |
| 1437423_a_at | -0.064225114 | 9.936840118 | -0.807411644 | 0.439373207 | 0.439373207 | -5.328349082 |
| 1417752_at   | 0.103070563  | 6.813338521 | 0.807363921  | 0.439399373 | 0.439399373 | -5.328383633 |
| 1423059_at   | 0.064323428  | 9.396296163 | 0.807318056  | 0.439424521 | 0.439424521 | -5.328416837 |
| 1419576_at   | -0.066767372 | 4.413368044 | -0.807302909 | 0.439432826 | 0.439432826 | -5.328427802 |
| 1436505_at   | 0.115408222  | 9.558719946 | 0.807280471  | 0.439445129 | 0.439445129 | -5.328444045 |
| 1442647_at   | 0.074507212  | 5.53551621  | 0.80722843   | 0.439473665 | 0.439473665 | -5.328481718 |
| 1445477_at   | 0.091838297  | 5.042520807 | 0.807227195  | 0.439474342 | 0.439474342 | -5.328482611 |
| 1445933_at   | 0.053611991  | 7.410341662 | 0.80714108   | 0.439521565 | 0.439521565 | -5.328544944 |
| 1420391_at   | 0.086875009  | 6.239223817 | 0.807036616  | 0.439578855 | 0.439578855 | -5.328620551 |
| 1441844_at   | 0.134777306  | 4.472247161 | 0.806987559  | 0.43960576  | 0.43960576  | -5.328656053 |
| 1416509_at   | -0.058577213 | 10.88158289 | -0.806913984 | 0.439646114 | 0.439646114 | -5.328709296 |

|                |              |             |              |             |             |              |
|----------------|--------------|-------------|--------------|-------------|-------------|--------------|
| 1451194_at     | -0.077934711 | 4.18876511  | -0.806876535 | 0.439666655 | 0.439666655 | -5.328736395 |
| 1428252_at     | 0.079305047  | 9.779370718 | 0.806846294  | 0.439683243 | 0.439683243 | -5.328758277 |
| 1442145_at     | -0.0537941   | 7.182867427 | -0.806765168 | 0.439727744 | 0.439727744 | -5.328816975 |
| 1427145_at     | -0.084886904 | 7.044255423 | -0.806653941 | 0.439788762 | 0.439788762 | -5.328897444 |
| 1430485_at     | 0.054160675  | 7.870701748 | 0.806586633  | 0.439825689 | 0.439825689 | -5.328946134 |
| 1416033_at     | -0.0666385   | 4.553864191 | -0.806548835 | 0.439846427 | 0.439846427 | -5.328973476 |
| 1419528_at     | 0.075490988  | 3.58313855  | 0.806541398  | 0.439850507 | 0.439850507 | -5.328978856 |
| 1420698_at     | 0.067771298  | 4.900189972 | 0.806490641  | 0.439878357 | 0.439878357 | -5.32901557  |
| 1459047_x_at   | 0.066423041  | 3.523758432 | 0.806484643  | 0.439881648 | 0.439881648 | -5.329019908 |
| 1444666_at     | 0.050842182  | 4.298842974 | 0.806356074  | 0.439952196 | 0.439952196 | -5.329112895 |
| 1433037_at     | -0.073714414 | 3.995223564 | -0.806322479 | 0.439970632 | 0.439970632 | -5.32913719  |
| 1434518_at     | 0.059031451  | 8.271922578 | 0.806316191  | 0.439974082 | 0.439974082 | -5.329141737 |
| 1421983_s_at   | 0.054861738  | 3.823844128 | 0.806283082  | 0.439992252 | 0.439992252 | -5.329165681 |
| 1436698_x_at   | 0.120538686  | 6.969428885 | 0.806206879  | 0.440034072 | 0.440034072 | -5.329220784 |
| 1446752_at     | 0.086451942  | 3.806823156 | 0.80617379   | 0.440052232 | 0.440052232 | -5.32924471  |
| 1447247_at     | 0.080874135  | 6.539185387 | 0.806148063  | 0.440066352 | 0.440066352 | -5.329263312 |
| 1450511_at     | -0.071809718 | 4.896242091 | -0.80611032  | 0.440087067 | 0.440087067 | -5.3292906   |
| 1449703_at     | -0.050159154 | 4.202571554 | -0.806102614 | 0.440091297 | 0.440091297 | -5.329296172 |
| 1426220_at     | 0.071834585  | 6.557319401 | 0.80604854   | 0.440120977 | 0.440120977 | -5.329335267 |
| 1436545_at     | -0.068398833 | 8.110098394 | -0.806015584 | 0.440139067 | 0.440139067 | -5.329359092 |
| 1454804_at     | -0.075800795 | 8.233205054 | -0.806011255 | 0.440141443 | 0.440141443 | -5.329362222 |
| 1416779_at     | -0.073216988 | 7.44832125  | -0.806002978 | 0.440145986 | 0.440145986 | -5.329368206 |
| 1416762_at     | 0.053135825  | 11.07115288 | 0.805988108  | 0.440154149 | 0.440154149 | -5.329378956 |
| 1450021_at     | 0.061212106  | 10.76044471 | 0.805975303  | 0.440161178 | 0.440161178 | -5.329388212 |
| 1435815_at     | -0.098959258 | 4.072332946 | -0.805930907 | 0.440185548 | 0.440185548 | -5.329420306 |
| 1453306_at     | 0.048750536  | 6.252578499 | 0.805914936  | 0.440194315 | 0.440194315 | -5.32943185  |
| 1457976_at     | -0.063330541 | 4.546675514 | -0.805801247 | 0.440256728 | 0.440256728 | -5.329514027 |
| 1424867_a_at   | -0.056733258 | 3.505717492 | -0.805691161 | 0.440317169 | 0.440317169 | -5.329593589 |
| 1417633_at     | 0.086859558  | 4.630900368 | 0.805677838  | 0.440324484 | 0.440324484 | -5.329603218 |
| 1456177_x_at   | 0.084607946  | 10.62855739 | 0.805671738  | 0.440327833 | 0.440327833 | -5.329607626 |
| 1440504_at     | -0.093930809 | 3.520793372 | -0.805653486 | 0.440337855 | 0.440337855 | -5.329620816 |
| 1454157_a_at   | -0.06129049  | 4.018163217 | -0.805636602 | 0.440347125 | 0.440347125 | -5.329633018 |
| 1444630_at     | 0.065999394  | 6.0738379   | 0.805615364  | 0.440358787 | 0.440358787 | -5.329648365 |
| 1437560_at     | -0.066079061 | 5.849284942 | -0.805540281 | 0.440400015 | 0.440400015 | -5.32970262  |
| 1422765_at     | 0.088139873  | 4.736745087 | 0.805520761  | 0.440410734 | 0.440410734 | -5.329716725 |
| 1452474_a_at   | -0.058466375 | 3.312381445 | -0.805428659 | 0.440461312 | 0.440461312 | -5.32978327  |
| 1415994_at     | 0.075845496  | 4.29357813  | 0.805361374  | 0.440498265 | 0.440498265 | -5.329831881 |
| 1433046_at     | -0.057367513 | 3.622284511 | -0.805359523 | 0.440499281 | 0.440499281 | -5.329833219 |
| AFFX-PheX-M_at | -0.077131568 | 5.104627925 | -0.805338114 | 0.440511039 | 0.440511039 | -5.329848685 |
| 1438639_x_at   | 0.08474025   | 3.497839569 | 0.805284288  | 0.440540602 | 0.440540602 | -5.329887568 |
| 1454720_at     | 0.06975598   | 5.157242197 | 0.805226365  | 0.440572416 | 0.440572416 | -5.32992941  |
| 1429640_at     | 0.057152682  | 3.250816604 | 0.805112219  | 0.440635116 | 0.440635116 | -5.330011856 |
| 1431586_at     | -0.055179636 | 3.87057572  | -0.805108134 | 0.44063736  | 0.44063736  | -5.330014807 |
| 1439535_at     | -0.072911279 | 6.336439126 | -0.805078392 | 0.440653698 | 0.440653698 | -5.330036287 |
| 1445585_at     | 0.053150634  | 3.785449135 | 0.805054863  | 0.440666624 | 0.440666624 | -5.33005328  |
| 1454345_at     | -0.080937931 | 3.624012346 | -0.805046629 | 0.440671147 | 0.440671147 | -5.330059227 |
| 1435849_at     | -0.116829494 | 4.417016287 | -0.805035666 | 0.44067717  | 0.44067717  | -5.330067144 |
| 1457268_at     | -0.075910922 | 7.584286569 | -0.804931684 | 0.440734295 | 0.440734295 | -5.330142234 |
| 1457478_at     | -0.066978697 | 5.907734243 | -0.804925726 | 0.440737568 | 0.440737568 | -5.330146536 |
| 1457607_at     | -0.070972979 | 4.675655083 | -0.804921775 | 0.440739739 | 0.440739739 | -5.33014939  |
| 1427106_at     | 0.128889775  | 5.369780464 | 0.804912705  | 0.440744722 | 0.440744722 | -5.330155939 |
| 1420086_x_at   | 0.073058206  | 3.972876134 | 0.80467037   | 0.440877877 | 0.440877877 | -5.330330905 |
| 1452790_x_at   | -0.064997398 | 11.6928853  | -0.804599889 | 0.440916609 | 0.440916609 | -5.330381784 |

|                |              |             |              |             |             |              |
|----------------|--------------|-------------|--------------|-------------|-------------|--------------|
| 1442070_at     | 0.1201491    | 6.758718007 | 0.804582701  | 0.440926055 | 0.440926055 | -5.330394191 |
| 1450759_at     | -0.086485945 | 8.199194849 | -0.804523158 | 0.440958778 | 0.440958778 | -5.33043717  |
| 1437448_s_at   | -0.071831084 | 8.817610646 | -0.804485973 | 0.440979215 | 0.440979215 | -5.33046401  |
| 1425666_at     | -0.077449352 | 3.967947157 | -0.804485532 | 0.440979457 | 0.440979457 | -5.330464328 |
| 1423108_at     | 0.083176677  | 9.155163312 | 0.804462945  | 0.440991872 | 0.440991872 | -5.33048063  |
| 1449862_a_at   | -0.08287619  | 7.450815196 | -0.804400916 | 0.441025965 | 0.441025965 | -5.330525398 |
| 1452321_at     | -0.057822845 | 8.765697689 | -0.804321604 | 0.441069559 | 0.441069559 | -5.330582635 |
| 1424835_at     | -0.070295727 | 6.40554572  | -0.804296628 | 0.441083288 | 0.441083288 | -5.330600658 |
| 1442635_at     | -0.109023386 | 4.940695455 | -0.804257895 | 0.44110458  | 0.44110458  | -5.330628609 |
| 1432436_a_at   | 0.072566471  | 7.037017068 | 0.804241475  | 0.441113607 | 0.441113607 | -5.330640457 |
| 1460216_at     | 0.071345676  | 7.78962802  | 0.804229761  | 0.441120046 | 0.441120046 | -5.33064891  |
| 1453349_at     | -0.049080399 | 4.634738133 | -0.804197356 | 0.44113786  | 0.44113786  | -5.330672292 |
| 1434467_at     | -0.084398747 | 4.219338828 | -0.804185233 | 0.441144524 | 0.441144524 | -5.330681039 |
| 1447238_at     | -0.063335586 | 3.398122559 | -0.804121015 | 0.441179829 | 0.441179829 | -5.330727373 |
| 1456615_a_at   | 0.056843964  | 10.67146866 | 0.804093093  | 0.44119518  | 0.44119518  | -5.330747518 |
| 1431131_s_at   | 0.054600762  | 8.07385231  | 0.803992494  | 0.44125049  | 0.44125049  | -5.330820093 |
| 1437652_at     | -0.089517057 | 4.319414562 | -0.803964045 | 0.441266133 | 0.441266133 | -5.330840615 |
| 1419797_at     | -0.062845874 | 3.196693444 | -0.803946167 | 0.441275963 | 0.441275963 | -5.330853511 |
| 1434891_at     | -0.080144889 | 10.13984588 | -0.803676421 | 0.4414243   | 0.4414243   | -5.331048065 |
| 1439352_at     | -0.076078678 | 3.722390905 | -0.803668162 | 0.441428842 | 0.441428842 | -5.331054021 |
| 1427129_a_at   | 0.075785743  | 11.37176975 | 0.803618514  | 0.441456148 | 0.441456148 | -5.331089824 |
| 1425411_at     | 0.062585521  | 4.276773739 | 0.803480796  | 0.441531898 | 0.441531898 | -5.331189125 |
| 1439284_at     | -0.079989417 | 5.761781957 | -0.803461466 | 0.441542531 | 0.441542531 | -5.331203062 |
| 1459709_at     | 0.057661863  | 3.42132377  | 0.803432473  | 0.441558479 | 0.441558479 | -5.331223964 |
| 1427860_at     | -0.065560698 | 3.604132347 | -0.803419866 | 0.441565414 | 0.441565414 | -5.331233054 |
| 1428501_at     | -0.056202876 | 8.484688242 | -0.803412999 | 0.441569192 | 0.441569192 | -5.331238004 |
| 1434457_at     | 0.065888956  | 3.640148856 | 0.803352221  | 0.441602626 | 0.441602626 | -5.33128182  |
| 1429406_at     | 0.088080814  | 4.593648161 | 0.803319341  | 0.441620715 | 0.441620715 | -5.331305523 |
| 1432651_at     | 0.052451724  | 6.492483445 | 0.803309225  | 0.44162628  | 0.44162628  | -5.331312815 |
| 1417568_at     | -0.076922103 | 7.019216646 | -0.803288533 | 0.441637664 | 0.441637664 | -5.331327731 |
| 1443354_at     | 0.055449477  | 7.049435384 | 0.8032877    | 0.441638122 | 0.441638122 | -5.331328332 |
| 1441121_at     | 0.055111444  | 6.478603504 | 0.803269633  | 0.441648062 | 0.441648062 | -5.331341356 |
| 1432632_at     | 0.053937908  | 4.574565557 | 0.803246941  | 0.441660546 | 0.441660546 | -5.331357712 |
| 1451338_at     | 0.060102865  | 6.631010538 | 0.803231158  | 0.44166923  | 0.44166923  | -5.331369089 |
| 1446644_at     | -0.074704912 | 7.121728177 | -0.803213674 | 0.441678849 | 0.441678849 | -5.331381691 |
| AFFX-ThrX-M_at | 0.091154345  | 4.728843379 | 0.803167433  | 0.441704291 | 0.441704291 | -5.33141502  |
| 1423199_at     | -0.071303792 | 7.045029259 | -0.803105968 | 0.44173811  | 0.44173811  | -5.331459321 |
| 1449460_at     | -0.071205386 | 6.882222438 | -0.803099433 | 0.441741706 | 0.441741706 | -5.33146403  |
| 1424946_a_at   | -0.06212661  | 7.849004232 | -0.803065127 | 0.441760583 | 0.441760583 | -5.331488754 |
| 1449755_at     | 0.065015537  | 6.282531176 | 0.803024235  | 0.441783084 | 0.441783084 | -5.331518223 |
| 1439408_a_at   | 0.057703573  | 3.35609559  | 0.803015999  | 0.441787617 | 0.441787617 | -5.331524159 |
| 1451862_a_at   | -0.077838892 | 4.663264692 | -0.803011972 | 0.441789832 | 0.441789832 | -5.331527061 |
| 1421114_a_at   | 0.177835764  | 4.863783694 | 0.803006694  | 0.441792737 | 0.441792737 | -5.331530864 |
| 1421115_a_at   | 0.049354122  | 8.943423166 | 0.802900284  | 0.441851295 | 0.441851295 | -5.331607542 |
| 1445350_at     | -0.114072268 | 5.314285896 | -0.80287931  | 0.441862838 | 0.441862838 | -5.331622655 |
| 1453881_x_at   | -0.08390739  | 4.80181919  | -0.802827924 | 0.441891118 | 0.441891118 | -5.331659679 |
| 1434352_at     | 0.084751844  | 8.170086958 | 0.802814327  | 0.441898601 | 0.441898601 | -5.331669476 |
| 1453455_at     | 0.065969418  | 6.160977507 | 0.802786877  | 0.441913709 | 0.441913709 | -5.331689253 |
| 1423941_at     | 0.052327794  | 9.046609899 | 0.802662824  | 0.44198199  | 0.44198199  | -5.331778623 |
| 1422082_a_at   | 0.075788284  | 7.510305795 | 0.802533588  | 0.44205313  | 0.44205313  | -5.331871714 |
| 1432935_at     | -0.070530652 | 4.23760368  | -0.802510169 | 0.442066022 | 0.442066022 | -5.331888581 |
| 1447423_at     | 0.07010418   | 3.582390615 | 0.802467618  | 0.442089448 | 0.442089448 | -5.331919228 |
| 1428623_at     | -0.074647172 | 7.982853666 | -0.802451383 | 0.442098386 | 0.442098386 | -5.331930921 |

|              |              |             |              |             |             |              |
|--------------|--------------|-------------|--------------|-------------|-------------|--------------|
| 1431840_at   | -0.100725074 | 4.525946661 | -0.802414132 | 0.442118894 | 0.442118894 | -5.331957749 |
| 1423873_at   | 0.067075971  | 8.465254327 | 0.802373401  | 0.442141319 | 0.442141319 | -5.331987082 |
| 1432026_a_at | 0.054565072  | 3.932490605 | 0.802190141  | 0.442242224 | 0.442242224 | -5.332119042 |
| 1432340_at   | 0.094619609  | 4.664272164 | 0.802149691  | 0.442264499 | 0.442264499 | -5.332148166 |
| 1442537_at   | -0.074030329 | 6.002989843 | -0.802092178 | 0.442296171 | 0.442296171 | -5.332189573 |
| 1428696_at   | 0.088720297  | 7.233936034 | 0.801992307  | 0.442351172 | 0.442351172 | -5.332261469 |
| 1419763_at   | -0.056355171 | 3.884963351 | -0.801970698 | 0.442363073 | 0.442363073 | -5.332277024 |
| 1423997_at   | -0.077903413 | 10.45288851 | -0.801937618 | 0.442381293 | 0.442381293 | -5.332300836 |
| 1442901_at   | 0.072327882  | 6.190309201 | 0.801856333  | 0.442426064 | 0.442426064 | -5.332359344 |
| 1438481_at   | -0.104255484 | 6.361947941 | -0.801838522 | 0.442435874 | 0.442435874 | -5.332372163 |
| 1449024_a_at | -0.065546026 | 10.11464678 | -0.801838157 | 0.442436075 | 0.442436075 | -5.332372425 |
| 1429812_at   | -0.117897263 | 5.540106366 | -0.80179244  | 0.442461258 | 0.442461258 | -5.332405329 |
| 1452427_s_at | 0.070801616  | 8.631076878 | 0.801761398  | 0.442478357 | 0.442478357 | -5.332427669 |
| 1458762_at   | -0.06623872  | 4.169371663 | -0.80169262  | 0.442516244 | 0.442516244 | -5.332477165 |
| 1431170_at   | 0.061210576  | 7.823391336 | 0.801638092  | 0.442546284 | 0.442546284 | -5.332516404 |
| 1439350_s_at | -0.078325666 | 7.534039726 | -0.80161155  | 0.442560906 | 0.442560906 | -5.332535503 |
| 1417799_at   | 0.090539158  | 5.969546962 | 0.801550113  | 0.442594754 | 0.442594754 | -5.332579709 |
| 1445989_at   | -0.065316124 | 3.384535738 | -0.801484436 | 0.442630939 | 0.442630939 | -5.332626963 |
| 1416764_at   | -0.05537991  | 9.456647814 | -0.801461426 | 0.442643618 | 0.442643618 | -5.332643518 |
| 1445205_at   | 0.074850485  | 4.02699002  | 0.80144422   | 0.442653098 | 0.442653098 | -5.332655896 |
| 1438373_at   | 0.072976902  | 3.703385866 | 0.801434544  | 0.44265843  | 0.44265843  | -5.332662858 |
| 1421353_at   | -0.109672377 | 4.953279479 | -0.801422061 | 0.442665308 | 0.442665308 | -5.332671838 |
| 1432563_at   | -0.068373378 | 4.551049972 | -0.801414844 | 0.442669285 | 0.442669285 | -5.33267703  |
| 1450834_at   | 0.082851677  | 4.132079346 | 0.801410099  | 0.442671899 | 0.442671899 | -5.332680444 |
| 1453623_a_at | -0.083790629 | 6.883655637 | -0.80139966  | 0.442677651 | 0.442677651 | -5.332687954 |
| 1444378_at   | -0.099085948 | 6.798512921 | -0.801391903 | 0.442681925 | 0.442681925 | -5.332693534 |
| 1437549_at   | -0.060471195 | 6.045942834 | -0.801383564 | 0.44268652  | 0.44268652  | -5.332699533 |
| 1437746_at   | 0.0689423    | 4.01931082  | 0.801364038  | 0.44269728  | 0.44269728  | -5.33271358  |
| 1418359_at   | 0.08681747   | 7.433176935 | 0.801353502  | 0.442703086 | 0.442703086 | -5.332721159 |
| 1433460_at   | -0.07794105  | 7.907938164 | -0.801325531 | 0.442718499 | 0.442718499 | -5.33274128  |
| 1418182_at   | -0.068818484 | 5.298083098 | -0.801316361 | 0.442723552 | 0.442723552 | -5.332747876 |
| 1455065_x_at | 0.054945443  | 8.242690349 | 0.801268275  | 0.442750051 | 0.442750051 | -5.332782465 |
| 1447060_at   | -0.060403274 | 6.663669445 | -0.801242888 | 0.442764041 | 0.442764041 | -5.332800726 |
| 1420439_at   | -0.052622752 | 4.188668217 | -0.801223947 | 0.442774479 | 0.442774479 | -5.332814349 |
| 1437148_at   | 0.064606021  | 12.15421257 | 0.801214337  | 0.442779775 | 0.442779775 | -5.332821261 |
| 1418563_at   | 0.056490015  | 9.658739235 | 0.801156831  | 0.442811468 | 0.442811468 | -5.332862622 |
| 1424754_at   | 0.064405866  | 5.427456845 | 0.801067642  | 0.442860624 | 0.442860624 | -5.332926764 |
| 1437184_at   | -0.073151803 | 6.959492807 | -0.801054157 | 0.442868057 | 0.442868057 | -5.332936462 |
| 1439724_at   | -0.078081279 | 6.05900386  | -0.800964819 | 0.442917299 | 0.442917299 | -5.333000705 |
| 1444908_at   | -0.093447123 | 4.756256036 | -0.800757328 | 0.443031682 | 0.443031682 | -5.333149888 |
| 1435695_a_at | 0.075011871  | 5.910488376 | 0.800692617  | 0.443067359 | 0.443067359 | -5.333196407 |
| 1417056_at   | 0.048198715  | 9.879391128 | 0.800621312  | 0.443106674 | 0.443106674 | -5.333247664 |
| 1423051_at   | -0.052376078 | 11.38841556 | -0.800608586 | 0.44311369  | 0.44311369  | -5.333256811 |
| 1460111_at   | 0.076284251  | 3.680654177 | 0.800493625  | 0.443177081 | 0.443177081 | -5.333339439 |
| 1430124_x_at | 0.048869954  | 11.75937835 | 0.800434358  | 0.443209763 | 0.443209763 | -5.333382033 |
| 1438846_x_at | -0.062519798 | 3.305517533 | -0.800370711 | 0.443244863 | 0.443244863 | -5.333427772 |
| 1419487_at   | -0.347927845 | 6.821709032 | -0.80034129  | 0.443261088 | 0.443261088 | -5.333448914 |
| 1452715_at   | 0.058384444  | 6.303426884 | 0.800331129  | 0.443266692 | 0.443266692 | -5.333456215 |
| 1446003_at   | -0.065959336 | 5.434496828 | -0.800295087 | 0.44328657  | 0.44328657  | -5.333482114 |
| 1443173_at   | -0.050062596 | 8.648930238 | -0.800280517 | 0.443294606 | 0.443294606 | -5.333492583 |
| 1427816_at   | -0.06201667  | 7.879927534 | -0.800215748 | 0.443330329 | 0.443330329 | -5.333539121 |
| 1434097_at   | 0.087441529  | 6.709877986 | 0.800145286  | 0.443369194 | 0.443369194 | -5.333589745 |
| 1459504_at   | 0.062065398  | 4.930384784 | 0.800128784  | 0.443378296 | 0.443378296 | -5.333601601 |



|              |              |             |              |             |             |              |
|--------------|--------------|-------------|--------------|-------------|-------------|--------------|
| 1434577_at   | -0.071004143 | 7.418189017 | -0.800025522 | 0.443435258 | 0.443435258 | -5.333675782 |
| 1451451_at   | 0.055577805  | 3.384980954 | 0.800011939  | 0.443442751 | 0.443442751 | -5.33368554  |
| 1428139_at   | -0.050642489 | 5.885747638 | -0.79999704  | 0.44345097  | 0.44345097  | -5.333696242 |
| 1426983_at   | 0.05439011   | 8.030308599 | 0.799993336  | 0.443453014 | 0.443453014 | -5.333698903 |
| 1417747_at   | -0.063125962 | 6.901596486 | -0.799937013 | 0.443484085 | 0.443484085 | -5.333739359 |
| 1453798_at   | -0.069697387 | 4.612967875 | -0.799904108 | 0.443502239 | 0.443502239 | -5.333762993 |
| 1457155_at   | 0.052828991  | 4.295583374 | 0.799782389  | 0.443569395 | 0.443569395 | -5.333850412 |
| 1444013_at   | -0.074364382 | 4.813710759 | -0.799732143 | 0.443597119 | 0.443597119 | -5.333886496 |
| 1433437_at   | 0.052921165  | 4.222400637 | 0.799690517  | 0.443620088 | 0.443620088 | -5.333916387 |
| 1460136_at   | -0.076448619 | 4.050859516 | -0.799607155 | 0.443666088 | 0.443666088 | -5.333976246 |
| 1444262_at   | -0.068229172 | 4.061530627 | -0.799601814 | 0.443669036 | 0.443669036 | -5.333980081 |
| 1426598_at   | 0.801448966  | 4.573939577 | 0.79959752   | 0.443671406 | 0.443671406 | -5.333983164 |
| 1436352_at   | -0.076937281 | 7.885831806 | -0.799587925 | 0.4436767   | 0.4436767   | -5.333990054 |
| 1425645_s_at | -0.068560429 | 3.464459728 | -0.799542196 | 0.443701936 | 0.443701936 | -5.334022886 |
| 1451416_a_at | 0.075647008  | 4.539462168 | 0.799496446  | 0.443727185 | 0.443727185 | -5.334055733 |
| 1453173_at   | -0.062786476 | 7.161065641 | -0.799450883 | 0.443752331 | 0.443752331 | -5.334088444 |
| 1438582_at   | -0.065373788 | 5.5067853   | -0.79939198  | 0.443784841 | 0.443784841 | -5.334130729 |
| 1417736_at   | 0.08261783   | 8.285010305 | 0.799341391  | 0.443812763 | 0.443812763 | -5.334167043 |
| 1426905_a_at | 0.088245232  | 9.807203377 | 0.79932388   | 0.443822429 | 0.443822429 | -5.334179613 |
| 1456683_at   | -0.064994965 | 7.275815951 | -0.799212651 | 0.443883826 | 0.443883826 | -5.334259449 |
| 1437942_x_at | -0.092489633 | 6.665896593 | -0.799205378 | 0.443887841 | 0.443887841 | -5.334264669 |
| 1436035_at   | 0.060136382  | 3.829919971 | 0.799167068  | 0.44390899  | 0.44390899  | -5.334292164 |
| 1428467_at   | 0.063243694  | 9.544775844 | 0.799082676  | 0.443955579 | 0.443955579 | -5.334352728 |
| 1433475_a_at | -0.079915245 | 10.79125423 | -0.798901936 | 0.444055369 | 0.444055369 | -5.334482418 |
| 1419848_x_at | -0.078804846 | 3.835169504 | -0.798895338 | 0.444059012 | 0.444059012 | -5.334487152 |
| 1423955_a_at | 0.059802101  | 9.362212684 | 0.798785156  | 0.444119853 | 0.444119853 | -5.3345662   |
| 1449779_at   | 0.050894898  | 3.860605452 | 0.798780266  | 0.444122554 | 0.444122554 | -5.334569709 |
| 1446206_at   | -0.06062354  | 3.682271893 | -0.798752678 | 0.444137788 | 0.444137788 | -5.334589499 |
| 1422814_at   | -0.050675342 | 9.107679598 | -0.798679187 | 0.444178373 | 0.444178373 | -5.334642217 |
| 1418145_at   | -0.093342166 | 7.273788455 | -0.798523882 | 0.444264148 | 0.444264148 | -5.334753609 |
| 1441431_at   | -0.103013229 | 5.239769188 | -0.798480905 | 0.444287886 | 0.444287886 | -5.334784431 |
| 1435646_at   | -0.053623213 | 7.172001681 | -0.798436277 | 0.444312536 | 0.444312536 | -5.334816436 |
| 1423156_at   | 0.058569232  | 8.517989575 | 0.798418042  | 0.444322609 | 0.444322609 | -5.334829513 |
| 1458424_at   | 0.073216163  | 4.55175333  | 0.798417383  | 0.444322973 | 0.444322973 | -5.334829985 |
| 1421718_at   | -0.07939932  | 4.103674941 | -0.798346056 | 0.444362374 | 0.444362374 | -5.334881132 |
| 1429296_at   | 0.065780267  | 10.17192741 | 0.798293696  | 0.444391299 | 0.444391299 | -5.334918676 |
| 1426145_at   | 0.086199217  | 3.705418399 | 0.798240761  | 0.444420543 | 0.444420543 | -5.33495663  |
| 1421148_a_at | -0.071231702 | 9.306574868 | -0.798199122 | 0.444443547 | 0.444443547 | -5.334986483 |
| 1458154_at   | 0.055777604  | 3.123493955 | 0.798125826  | 0.444484043 | 0.444484043 | -5.33503903  |
| 1438380_at   | -0.060697194 | 2.931839371 | -0.798121015 | 0.444486702 | 0.444486702 | -5.335042479 |
| 1424616_s_at | 0.07826232   | 8.508741519 | 0.798105377  | 0.444495342 | 0.444495342 | -5.335053689 |
| 1430789_at   | 0.063953947  | 3.778419385 | 0.79805395   | 0.444523757 | 0.444523757 | -5.335090555 |
| 1416585_at   | -0.054637723 | 9.217648753 | -0.798031635 | 0.444536087 | 0.444536087 | -5.335106551 |
| 1455068_at   | -0.068988273 | 5.126210821 | -0.797973252 | 0.444568348 | 0.444568348 | -5.335148399 |
| 1417051_at   | -0.103516774 | 6.711073285 | -0.79773189  | 0.444701734 | 0.444701734 | -5.335321376 |
| 1444744_at   | -0.07139219  | 6.85813247  | -0.797648082 | 0.444748056 | 0.444748056 | -5.335381429 |
| 1456782_at   | 0.050126019  | 7.519750434 | 0.79764747   | 0.444748394 | 0.444748394 | -5.335381868 |
| 1449617_at   | 0.055575757  | 6.749533531 | 0.797644843  | 0.444749846 | 0.444749846 | -5.33538375  |
| 1453834_at   | -0.075354964 | 5.16000353  | -0.79762512  | 0.444760748 | 0.444760748 | -5.335397882 |
| 1423918_at   | -0.07851856  | 6.82684636  | -0.79752717  | 0.444814892 | 0.444814892 | -5.335468059 |
| 1430958_at   | 0.07628057   | 3.558952477 | 0.797443925  | 0.44486091  | 0.44486091  | -5.335527695 |
| 1448098_at   | 0.070246441  | 2.978595095 | 0.797420577  | 0.444873818 | 0.444873818 | -5.335544421 |
| 1419748_at   | -0.10159081  | 5.196057691 | -0.797411084 | 0.444879065 | 0.444879065 | -5.33555122  |

|              |              |             |              |             |             |              |
|--------------|--------------|-------------|--------------|-------------|-------------|--------------|
| 1444122_at   | -0.061318257 | 3.366895937 | -0.797258018 | 0.444963692 | 0.444963692 | -5.335660858 |
| 1434605_at   | 0.0533853    | 8.799336859 | 0.797248373  | 0.444969025 | 0.444969025 | -5.335667765 |
| 1442992_at   | -0.092293333 | 7.098273841 | -0.797197192 | 0.444997324 | 0.444997324 | -5.335704421 |
| 1449150_at   | 0.066429979  | 8.07584871  | 0.797189106  | 0.445001795 | 0.445001795 | -5.335710212 |
| 1431860_at   | 0.063555684  | 6.458580295 | 0.797178238  | 0.445007805 | 0.445007805 | -5.335717995 |
| 1436279_at   | -0.115245197 | 7.357336893 | -0.797169452 | 0.445012663 | 0.445012663 | -5.335724287 |
| 1431052_at   | 0.093015405  | 4.388395609 | 0.797068082  | 0.445068718 | 0.445068718 | -5.335796879 |
| 1431618_a_at | 0.066903749  | 6.848337463 | 0.797065727  | 0.44507002  | 0.44507002  | -5.335798566 |
| 1455801_x_at | 0.081654265  | 9.392604178 | 0.796936845  | 0.445141296 | 0.445141296 | -5.335890848 |
| 1416453_x_at | -0.049709077 | 12.96274305 | -0.796931173 | 0.445144433 | 0.445144433 | -5.335894908 |
| 1430925_at   | -0.061225691 | 4.43941054  | -0.796757355 | 0.445240572 | 0.445240572 | -5.336019345 |
| 1456319_at   | 0.584225879  | 7.773940657 | 0.79670411   | 0.445270024 | 0.445270024 | -5.336057458 |
| 1422143_at   | 0.081213311  | 3.854790098 | 0.796681894  | 0.445282313 | 0.445282313 | -5.336073359 |
| 1431315_at   | -0.131783756 | 5.737039702 | -0.796614009 | 0.445319866 | 0.445319866 | -5.336121948 |
| 1459957_at   | -0.14723742  | 8.152435891 | -0.796604097 | 0.44532535  | 0.44532535  | -5.336129042 |
| 1437693_at   | 0.04839893   | 3.381507489 | 0.796535158  | 0.445363489 | 0.445363489 | -5.336178381 |
| 1433127_at   | 0.074956178  | 4.429920215 | 0.796521925  | 0.44537081  | 0.44537081  | -5.336187851 |
| 1426827_at   | 0.079120636  | 9.504065624 | 0.796510353  | 0.445377212 | 0.445377212 | -5.336196132 |
| 1415998_at   | -0.065013494 | 11.00114462 | -0.796501038 | 0.445382366 | 0.445382366 | -5.336202799 |
| 1428305_at   | 0.057550859  | 3.373654888 | 0.796462736  | 0.445403557 | 0.445403557 | -5.336230208 |
| 1438216_at   | 0.070648422  | 4.414800573 | 0.796387701  | 0.445445073 | 0.445445073 | -5.336283901 |
| 1455933_at   | 0.082598805  | 7.531037387 | 0.796384533  | 0.445446826 | 0.445446826 | -5.336286168 |
| 1430290_at   | -0.05862646  | 4.732155097 | -0.796369226 | 0.445455295 | 0.445455295 | -5.336297121 |
| 1439429_x_at | 0.08667809   | 8.228607733 | 0.796357848  | 0.445461591 | 0.445461591 | -5.336305262 |
| 1419653_a_at | 0.068529857  | 11.86130182 | 0.796300847  | 0.445493132 | 0.445493132 | -5.336346047 |
| 1455848_at   | 0.225713252  | 3.959567675 | 0.796296296  | 0.44549565  | 0.44549565  | -5.336349303 |
| 1458929_at   | -0.054480166 | 4.110425258 | -0.796242538 | 0.445525398 | 0.445525398 | -5.336387764 |
| 1444834_at   | -0.073452616 | 5.637874182 | -0.796162182 | 0.445569866 | 0.445569866 | -5.336445251 |
| 1426485_at   | 0.093440295  | 10.05459022 | 0.796158218  | 0.44557206  | 0.44557206  | -5.336448087 |
| 1418134_at   | 0.06308729   | 9.52984681  | 0.796145145  | 0.445579295 | 0.445579295 | -5.336457439 |
| 1450047_at   | 0.065645487  | 10.36698867 | 0.796101837  | 0.445603263 | 0.445603263 | -5.336488418 |
| 1449518_at   | 0.059113278  | 4.871861453 | 0.795918427  | 0.445704777 | 0.445704777 | -5.336619604 |
| 1439105_at   | 0.066391284  | 6.514388723 | 0.79588319   | 0.445724282 | 0.445724282 | -5.336644804 |
| 1455802_x_at | -0.062509925 | 3.210214097 | -0.795797928 | 0.445771479 | 0.445771479 | -5.336705777 |
| 1447710_at   | 0.071455586  | 3.230146292 | 0.79578746   | 0.445777274 | 0.445777274 | -5.336713262 |
| 1447867_x_at | 0.058822142  | 3.326513694 | 0.795785501  | 0.445778359 | 0.445778359 | -5.336714664 |
| 1445763_at   | -0.069576432 | 3.798530259 | -0.795776876 | 0.445783133 | 0.445783133 | -5.336720831 |
| 1432898_at   | -0.072882359 | 3.470984778 | -0.795748279 | 0.445798964 | 0.445798964 | -5.33674128  |
| 1418724_at   | 0.05154618   | 5.064442814 | 0.795657809  | 0.44584905  | 0.44584905  | -5.336805967 |
| 1454927_at   | -0.048724764 | 8.026931467 | -0.795595276 | 0.445883672 | 0.445883672 | -5.336850676 |
| 1421384_at   | -0.089509659 | 5.923654742 | -0.795510387 | 0.445930674 | 0.445930674 | -5.336911364 |
| 1429575_at   | 0.049653058  | 5.031192772 | 0.795504008  | 0.445934206 | 0.445934206 | -5.336915924 |
| 1435384_at   | 0.066786734  | 7.290365415 | 0.795462175  | 0.44595737  | 0.44595737  | -5.336945828 |
| 1445904_at   | -0.076164918 | 3.888105075 | -0.795383645 | 0.446000856 | 0.446000856 | -5.337001961 |
| 1438103_at   | 0.053050749  | 6.680208057 | 0.795365592  | 0.446010854 | 0.446010854 | -5.337014865 |
| 1426516_a_at | -0.096633244 | 6.94918587  | -0.795349621 | 0.446019698 | 0.446019698 | -5.337026281 |
| 1421253_at   | -0.083549434 | 5.378555361 | -0.795308722 | 0.446042348 | 0.446042348 | -5.337055513 |
| 1437004_at   | -0.05440101  | 4.652101809 | -0.795278491 | 0.446059089 | 0.446059089 | -5.337077118 |
| 1429170_a_at | 0.055516988  | 6.293675466 | 0.795217687  | 0.446092764 | 0.446092764 | -5.337120573 |
| 1427060_at   | 0.055682642  | 9.108788001 | 0.795202916  | 0.446100945 | 0.446100945 | -5.337131129 |
| 1436902_x_at | 0.091241634  | 12.20520491 | 0.795179864  | 0.446113713 | 0.446113713 | -5.337147602 |
| 1455551_at   | 0.170795431  | 6.671859766 | 0.795153264  | 0.446128446 | 0.446128446 | -5.337166611 |
| 1444382_at   | -0.055456558 | 4.318186719 | -0.795116842 | 0.446148619 | 0.446148619 | -5.337192638 |

|              |              |             |              |             |             |              |
|--------------|--------------|-------------|--------------|-------------|-------------|--------------|
| 1437284_at   | 0.078942811  | 11.1206006  | 0.795070503  | 0.446174287 | 0.446174287 | -5.337225749 |
| 1460604_at   | -0.060047904 | 8.050553351 | -0.795050857 | 0.446185168 | 0.446185168 | -5.337239787 |
| 1452731_x_at | -0.304604876 | 8.822925459 | -0.795038493 | 0.446192017 | 0.446192017 | -5.337248621 |
| 1444256_at   | 0.075331462  | 6.051158395 | 0.794845162  | 0.446299116 | 0.446299116 | -5.337386743 |
| 1422794_at   | 0.053515086  | 9.855227007 | 0.794832318  | 0.446306232 | 0.446306232 | -5.337395918 |
| 1443123_at   | 0.130959741  | 4.834897837 | 0.794815826  | 0.44631537  | 0.44631537  | -5.337407699 |
| 1431155_at   | 0.076373531  | 3.986188851 | 0.794795675  | 0.446326534 | 0.446326534 | -5.337422094 |
| 1430963_at   | -0.073060769 | 3.700608412 | -0.794781146 | 0.446334583 | 0.446334583 | -5.337432472 |
| 1429673_at   | 0.076620156  | 4.189814987 | 0.794775168  | 0.446337895 | 0.446337895 | -5.337436741 |
| 1420172_at   | 0.058484241  | 10.83844125 | 0.794726973  | 0.446364598 | 0.446364598 | -5.337471166 |
| 1423075_at   | 0.056902386  | 9.34942     | 0.794697491  | 0.446380933 | 0.446380933 | -5.337492224 |
| 1438556_a_at | 0.076659673  | 8.697704018 | 0.794641381  | 0.446412023 | 0.446412023 | -5.337532299 |
| 1419871_at   | -0.062051369 | 4.270946144 | -0.794612376 | 0.446428095 | 0.446428095 | -5.337553014 |
| 1429988_at   | 0.119073571  | 4.876874912 | 0.794587896  | 0.44644166  | 0.44644166  | -5.337570497 |
| 1423063_at   | -0.055772078 | 9.625975238 | -0.79455411  | 0.446460383 | 0.446460383 | -5.337594626 |
| 1449989_at   | 0.086690302  | 4.002503204 | 0.794526737  | 0.446475551 | 0.446475551 | -5.337614173 |
| 1447984_at   | -0.087151079 | 7.459921951 | -0.79447743  | 0.446502876 | 0.446502876 | -5.337649383 |
| 1454517_at   | 0.060690317  | 3.266527347 | 0.794459575  | 0.446512771 | 0.446512771 | -5.337662133 |
| 1426632_at   | 0.132412466  | 6.899065468 | 0.794417557  | 0.446536057 | 0.446536057 | -5.337692135 |
| 1433170_at   | -0.080489696 | 4.073825459 | -0.794341132 | 0.446578414 | 0.446578414 | -5.337746703 |
| 1445691_at   | -0.057540306 | 4.891510608 | -0.794274457 | 0.446615369 | 0.446615369 | -5.337794305 |
| 1441928_x_at | -0.08150751  | 6.978448682 | -0.794169836 | 0.44667336  | 0.44667336  | -5.337868992 |
| 1453910_at   | -0.069921457 | 3.459011982 | -0.794132191 | 0.446694228 | 0.446694228 | -5.337895863 |
| 1427262_at   | -1.794953904 | 8.31957579  | -0.794116117 | 0.446703138 | 0.446703138 | -5.337907337 |
| 1452466_a_at | 0.052612957  | 9.009946815 | 0.794087852  | 0.446718807 | 0.446718807 | -5.337927513 |
| 1432669_at   | -0.081544472 | 4.647372827 | -0.79406633  | 0.446730738 | 0.446730738 | -5.337942874 |
| 1421524_at   | -0.072435921 | 5.275064423 | -0.794015144 | 0.446759115 | 0.446759115 | -5.337979407 |
| 1458330_x_at | 0.050756327  | 7.134571882 | 0.793983002  | 0.446776934 | 0.446776934 | -5.338002347 |
| 1420106_at   | -0.054746777 | 6.863619203 | -0.793975078 | 0.446781327 | 0.446781327 | -5.338008002 |
| 1434483_at   | 0.056921994  | 7.893025686 | 0.79390118   | 0.446822298 | 0.446822298 | -5.338060741 |
| 1454653_at   | -0.078240566 | 3.893745725 | -0.793885984 | 0.446830724 | 0.446830724 | -5.338071585 |
| 1435490_at   | -0.056935731 | 6.902719902 | -0.793853786 | 0.446848576 | 0.446848576 | -5.338094561 |
| 1454923_at   | 0.075762805  | 9.174190599 | 0.793792223  | 0.446882711 | 0.446882711 | -5.338138491 |
| 1421046_a_at | -0.077960124 | 9.882087421 | -0.793788614 | 0.446884713 | 0.446884713 | -5.338141066 |
| 1437339_s_at | -0.098562387 | 9.054429148 | -0.793738695 | 0.446912393 | 0.446912393 | -5.338176685 |
| 1438792_at   | -0.075468846 | 3.671952286 | -0.793709778 | 0.446928428 | 0.446928428 | -5.338197317 |
| 1424607_a_at | 0.103296911  | 10.17256732 | 0.793641505  | 0.446966289 | 0.446966289 | -5.338246027 |
| 1420990_at   | -0.060817473 | 8.062163944 | -0.793543454 | 0.447020667 | 0.447020667 | -5.338315976 |
| 1436214_at   | -0.07388974  | 7.005430858 | -0.793465102 | 0.447064123 | 0.447064123 | -5.338371866 |
| 1422287_at   | -0.051327418 | 3.153071407 | -0.793417408 | 0.447090576 | 0.447090576 | -5.338405885 |
| 1447799_x_at | -0.081676715 | 3.714982119 | -0.79339154  | 0.447104925 | 0.447104925 | -5.338424336 |
| 1425339_at   | -0.082189615 | 7.05126922  | -0.793297605 | 0.44715703  | 0.44715703  | -5.33849133  |
| 1433297_at   | -0.068131872 | 3.705155438 | -0.793221806 | 0.447199078 | 0.447199078 | -5.338545385 |
| 1418920_at   | 0.079260357  | 4.02147839  | 0.793202064  | 0.447210031 | 0.447210031 | -5.338559463 |
| 1430698_a_at | 0.095861842  | 5.347613686 | 0.793174661  | 0.447225233 | 0.447225233 | -5.338579003 |
| 1417003_at   | -0.096632188 | 4.750447455 | -0.79313226  | 0.447248756 | 0.447248756 | -5.338609238 |
| 1422368_at   | -0.055141334 | 3.281623114 | -0.793068903 | 0.447283907 | 0.447283907 | -5.338654412 |
| 1434894_at   | -0.06185341  | 7.569742573 | -0.793045978 | 0.447296627 | 0.447296627 | -5.338670757 |
| 1431623_at   | 0.073164274  | 4.801900041 | 0.793028819  | 0.447306147 | 0.447306147 | -5.33868299  |
| 1418518_at   | 0.079311367  | 7.935692288 | 0.792969247  | 0.447339201 | 0.447339201 | -5.338725461 |
| 1423817_s_at | 0.058546216  | 9.452419985 | 0.792962786  | 0.447342786 | 0.447342786 | -5.338730068 |
| 1447317_at   | -0.077745568 | 4.800013392 | -0.79290977  | 0.447372204 | 0.447372204 | -5.338767862 |
| 1429694_at   | -0.081835881 | 6.77197277  | -0.792850704 | 0.44740498  | 0.44740498  | -5.338809967 |

|              |              |             |              |             |             |              |
|--------------|--------------|-------------|--------------|-------------|-------------|--------------|
| 1443018_at   | -0.07304462  | 8.577388039 | -0.792847388 | 0.44740682  | 0.44740682  | -5.338812331 |
| 1458146_at   | 0.090054458  | 5.141685829 | 0.792781601  | 0.447443328 | 0.447443328 | -5.338859223 |
| 1432397_at   | -0.082033351 | 4.074576552 | -0.792775741 | 0.44744658  | 0.44744658  | -5.3388634   |
| 1436258_at   | 0.066579986  | 3.418851564 | 0.792683445  | 0.447497803 | 0.447497803 | -5.338929182 |
| 1448062_at   | -0.100651277 | 5.196948714 | -0.792671405 | 0.447504485 | 0.447504485 | -5.338937762 |
| 1450176_at   | -0.059795882 | 3.923891084 | -0.792571642 | 0.447559856 | 0.447559856 | -5.339008858 |
| 1448554_s_at | -0.304145626 | 6.031963748 | -0.792517217 | 0.447590065 | 0.447590065 | -5.339047641 |
| 1432281_a_at | 0.065540094  | 4.147515587 | 0.792362564  | 0.447675915 | 0.447675915 | -5.339157832 |
| 1441769_at   | 0.067385292  | 8.621015641 | 0.792277158  | 0.447723329 | 0.447723329 | -5.339218675 |
| 1429525_s_at | 0.060813621  | 5.129792426 | 0.792153182  | 0.447792162 | 0.447792162 | -5.339306987 |
| 1454670_at   | -0.07098128  | 8.976803758 | -0.792059968 | 0.447843921 | 0.447843921 | -5.339373378 |
| 1429434_at   | -0.074103927 | 6.52122856  | -0.792056051 | 0.447846096 | 0.447846096 | -5.339376168 |
| 1457749_at   | -0.065429861 | 6.422046757 | -0.791939841 | 0.447910629 | 0.447910629 | -5.339458929 |
| 1443469_at   | -0.05842797  | 3.428358741 | -0.791909048 | 0.447927729 | 0.447927729 | -5.339480857 |
| 1432196_a_at | 0.066489876  | 3.827026235 | 0.791774968  | 0.448002195 | 0.448002195 | -5.339576327 |
| 1453194_at   | 0.099936153  | 4.761504568 | 0.791704197  | 0.448041504 | 0.448041504 | -5.339626714 |
| 1432349_a_at | 0.088637575  | 4.083404803 | 0.791702799  | 0.44804228  | 0.44804228  | -5.339627708 |
| 1421015_s_at | 0.066970789  | 8.206873656 | 0.791693167  | 0.44804763  | 0.44804763  | -5.339634566 |
| 1438786_a_at | 0.106190237  | 6.305528144 | 0.791691643  | 0.448048477 | 0.448048477 | -5.339635651 |
| 1457080_at   | -0.073919402 | 4.287924084 | -0.791658839 | 0.448066698 | 0.448066698 | -5.339659004 |
| 1445432_at   | -0.113274336 | 3.871353047 | -0.791593655 | 0.448102906 | 0.448102906 | -5.339705407 |
| 1451156_s_at | -0.084223428 | 4.409641042 | -0.791570295 | 0.448115883 | 0.448115883 | -5.339722036 |
| 1422028_a_at | 0.075173658  | 5.682530202 | 0.791523241  | 0.448142022 | 0.448142022 | -5.33975553  |
| 1433429_at   | -0.063602398 | 8.824485729 | -0.791415576 | 0.448201836 | 0.448201836 | -5.339832161 |
| 1425665_a_at | -0.095727941 | 9.566485232 | -0.79140986  | 0.448205012 | 0.448205012 | -5.339836229 |
| 1448232_x_at | -0.069452139 | 6.939154131 | -0.791369351 | 0.448227518 | 0.448227518 | -5.339865059 |
| 1426899_at   | -0.062275025 | 7.829641718 | -0.791331348 | 0.448248633 | 0.448248633 | -5.339892104 |
| 1426794_at   | -0.068261878 | 11.26134521 | -0.791330971 | 0.448248843 | 0.448248843 | -5.339892373 |
| 1420411_a_at | -0.16105686  | 7.13383323  | -0.791319443 | 0.448255247 | 0.448255247 | -5.339900576 |
| 1453214_at   | -0.0996343   | 4.446349775 | -0.791238644 | 0.448300142 | 0.448300142 | -5.339958073 |
| 1445448_at   | -0.080919025 | 3.487184629 | -0.791165747 | 0.44834065  | 0.44834065  | -5.340009944 |
| 1418501_a_at | 0.070788207  | 9.948276081 | 0.791148758  | 0.44835009  | 0.44835009  | -5.340022031 |
| 1454136_a_at | 0.07210217   | 8.700074103 | 0.79107566   | 0.448390712 | 0.448390712 | -5.340074039 |
| 1446398_at   | 0.053991886  | 3.605849539 | 0.791040927  | 0.448410015 | 0.448410015 | -5.340098749 |
| 1460263_at   | -0.057863052 | 3.964453424 | -0.790962595 | 0.448453549 | 0.448453549 | -5.340154474 |
| 1419807_at   | 0.06253312   | 4.208697722 | 0.790931831  | 0.448470647 | 0.448470647 | -5.340176358 |
| 1459266_at   | 0.192920499  | 6.377677616 | 0.790892394  | 0.448492567 | 0.448492567 | -5.34020441  |
| 1443906_at   | -0.151771171 | 6.018309331 | -0.790892268 | 0.448492637 | 0.448492637 | -5.3402045   |
| 1430379_at   | 0.053862358  | 8.029104953 | 0.790871718  | 0.448504059 | 0.448504059 | -5.340219117 |
| 1436621_at   | -0.064510745 | 7.040101871 | -0.790833643 | 0.448525222 | 0.448525222 | -5.340246199 |
| 1423550_at   | 0.071975317  | 7.171739409 | 0.7908174    | 0.448534251 | 0.448534251 | -5.340257753 |
| 1454236_a_at | -0.059857901 | 7.90597471  | -0.790807949 | 0.448539504 | 0.448539504 | -5.340264474 |
| 1458995_at   | -0.064204453 | 3.528058607 | -0.790789308 | 0.448549866 | 0.448549866 | -5.340277732 |
| 1452177_at   | -0.103283725 | 5.417878963 | -0.790779412 | 0.448555367 | 0.448555367 | -5.340284771 |
| 1455695_at   | 0.106871818  | 6.646693348 | 0.790752428  | 0.448570367 | 0.448570367 | -5.340303962 |
| 1450592_at   | -0.052992403 | 3.357839607 | -0.790735933 | 0.448579536 | 0.448579536 | -5.340315693 |
| 1445430_at   | 0.061015555  | 4.226692177 | 0.790664125  | 0.448619454 | 0.448619454 | -5.34036676  |
| 1453407_at   | 0.068526991  | 4.210520584 | 0.790651336  | 0.448626564 | 0.448626564 | -5.340375855 |
| 1455503_at   | 0.059441773  | 6.56004496  | 0.79063641   | 0.448634862 | 0.448634862 | -5.340386469 |
| 1441151_at   | -0.183925361 | 5.458813506 | -0.790635407 | 0.44863542  | 0.44863542  | -5.340387182 |
| 1449198_a_at | -0.072240052 | 8.281570099 | -0.790573839 | 0.448669648 | 0.448669648 | -5.340430963 |
| 1455873_a_at | -0.071975963 | 7.087143394 | -0.790565927 | 0.448674047 | 0.448674047 | -5.340436589 |
| 1419133_at   | 0.065182326  | 6.842638624 | 0.790474675  | 0.448724782 | 0.448724782 | -5.34050147  |

|              |              |             |              |             |             |              |
|--------------|--------------|-------------|--------------|-------------|-------------|--------------|
| 1429553_at   | -0.0872286   | 5.710259039 | -0.790426691 | 0.448751462 | 0.448751462 | -5.340535586 |
| 1435724_at   | 0.07767422   | 4.090156431 | 0.79035247   | 0.448792732 | 0.448792732 | -5.34058835  |
| 1445295_at   | 0.086960212  | 4.167120513 | 0.790287034  | 0.44882912  | 0.44882912  | -5.340634867 |
| 1423574_s_at | 0.083892478  | 7.106596454 | 0.79026615   | 0.448840733 | 0.448840733 | -5.340649712 |
| 1450893_a_at | 0.054802055  | 8.325379657 | 0.790264351  | 0.448841733 | 0.448841733 | -5.340650991 |
| 1436652_at   | -0.095569039 | 6.127927094 | -0.790246406 | 0.448851713 | 0.448851713 | -5.340663747 |
| 1438148_at   | 0.085565184  | 3.366005012 | 0.790165504  | 0.448896704 | 0.448896704 | -5.34072125  |
| 1419785_at   | 0.085304854  | 4.007070806 | 0.790072047  | 0.448948683 | 0.448948683 | -5.340787671 |
| 1459593_x_at | -0.066862116 | 8.252101579 | -0.790001088 | 0.44898815  | 0.44898815  | -5.340838097 |
| 1431532_at   | -0.056124743 | 3.29773991  | -0.789969244 | 0.449005863 | 0.449005863 | -5.340860726 |
| 1449680_at   | -0.068021194 | 4.318899787 | -0.789944169 | 0.449019811 | 0.449019811 | -5.340878544 |
| 1419323_at   | -0.111005574 | 4.247589014 | -0.789934537 | 0.449025169 | 0.449025169 | -5.340885389 |
| 1418118_at   | -0.060836169 | 4.403114581 | -0.789821589 | 0.449087999 | 0.449087999 | -5.340965641 |
| 1418590_at   | 0.104669033  | 5.040484825 | 0.789817107  | 0.449090493 | 0.449090493 | -5.340968825 |
| 1427299_at   | 0.0710485    | 7.566950094 | 0.789794129  | 0.449103276 | 0.449103276 | -5.340985151 |
| 1438617_at   | -0.071728351 | 3.139274469 | -0.789784366 | 0.449108707 | 0.449108707 | -5.340992086 |
| 1439228_at   | 0.071860643  | 4.367265913 | 0.78976433   | 0.449119854 | 0.449119854 | -5.341006321 |
| 1421092_at   | 0.064287218  | 5.052637452 | 0.789716851  | 0.449146268 | 0.449146268 | -5.341040051 |
| 1454464_at   | -0.071196327 | 3.181299048 | -0.789688145 | 0.449162239 | 0.449162239 | -5.341060443 |
| 1429301_at   | 0.054151307  | 7.529272282 | 0.789662778  | 0.449176352 | 0.449176352 | -5.341078463 |
| 1416617_at   | 0.077962545  | 6.560002712 | 0.789585121  | 0.44921956  | 0.44921956  | -5.341133625 |
| 1455919_at   | -0.063921628 | 3.113184021 | -0.789482196 | 0.449276832 | 0.449276832 | -5.341206729 |
| 1429128_x_at | 0.069663335  | 7.221801687 | 0.789473202  | 0.449281836 | 0.449281836 | -5.341213117 |
| 1452817_at   | -0.079601631 | 7.153938035 | -0.789456293 | 0.449291246 | 0.449291246 | -5.341225125 |
| 1459187_at   | -0.19239907  | 6.42172654  | -0.789442888 | 0.449298705 | 0.449298705 | -5.341234645 |
| 1421232_at   | -0.08645946  | 4.994852865 | -0.789363307 | 0.449342992 | 0.449342992 | -5.341291161 |
| 1441757_at   | 0.083885192  | 6.090520896 | 0.789360048  | 0.449344805 | 0.449344805 | -5.341293475 |
| 1455568_at   | -0.055541079 | 6.964427181 | -0.789142246 | 0.449466026 | 0.449466026 | -5.341448123 |
| 1426219_at   | 0.069614166  | 9.857177122 | 0.789091376  | 0.449494342 | 0.449494342 | -5.341484238 |
| 1456194_a_at | 0.048489549  | 10.37901477 | 0.789083457  | 0.44949875  | 0.44949875  | -5.341489859 |
| 1447722_at   | 0.087959535  | 3.860804989 | 0.789070806  | 0.449505792 | 0.449505792 | -5.34149884  |
| 1441500_at   | -0.082732149 | 3.523312686 | -0.78890188  | 0.449599831 | 0.449599831 | -5.341618751 |
| 1419053_at   | -0.060244542 | 8.397839354 | -0.788824713 | 0.449642793 | 0.449642793 | -5.341673519 |
| 1416212_at   | 0.054989333  | 11.09474798 | 0.78880162   | 0.44965565  | 0.44965565  | -5.341689908 |
| 1453446_at   | -0.087023259 | 6.515265718 | -0.788763558 | 0.449676842 | 0.449676842 | -5.34171692  |
| 1455505_at   | 0.083357235  | 7.346595562 | 0.78863069   | 0.449750825 | 0.449750825 | -5.341811205 |
| 1428274_s_at | 0.059763386  | 7.473686301 | 0.788589568  | 0.449773724 | 0.449773724 | -5.341840382 |
| 1457467_at   | 0.065313329  | 7.15502904  | 0.788539027  | 0.44980187  | 0.44980187  | -5.341876242 |
| 1417915_at   | -0.049727731 | 3.439418117 | -0.78853755  | 0.449802692 | 0.449802692 | -5.34187729  |
| 1434999_at   | 0.056584517  | 8.541184419 | 0.788475881  | 0.449837036 | 0.449837036 | -5.341921042 |
| 1460044_at   | 0.089959185  | 3.197689393 | 0.788441526  | 0.449856169 | 0.449856169 | -5.341945415 |
| 1430562_at   | 0.058609285  | 4.426370249 | 0.788419539  | 0.449868414 | 0.449868414 | -5.341961012 |
| 1435681_s_at | -0.08178176  | 6.148647124 | -0.788374028 | 0.449893762 | 0.449893762 | -5.341993297 |
| 1455151_at   | 0.253675663  | 6.209371209 | 0.788285455  | 0.449943096 | 0.449943096 | -5.342056124 |
| 1433871_at   | 0.059152848  | 10.23701897 | 0.788252751  | 0.449961313 | 0.449961313 | -5.342079321 |
| 1438765_at   | -0.100878936 | 6.868727543 | -0.788177542 | 0.450003207 | 0.450003207 | -5.342132662 |
| 1421162_a_at | -0.078772941 | 5.989883385 | -0.788005218 | 0.450099207 | 0.450099207 | -5.342254864 |
| 1446470_at   | -0.113939388 | 4.767567149 | -0.787990361 | 0.450107484 | 0.450107484 | -5.342265399 |
| 1425758_a_at | -0.104549249 | 4.416718702 | -0.787950177 | 0.450129873 | 0.450129873 | -5.342293891 |
| 1434591_at   | 0.067529049  | 8.194072951 | 0.787946696  | 0.450131812 | 0.450131812 | -5.342296359 |
| 1419359_at   | 0.057346495  | 7.586367109 | 0.787893431  | 0.45016149  | 0.45016149  | -5.342334125 |
| 1418626_a_at | 0.081850649  | 8.066407052 | 0.787688964  | 0.450275425 | 0.450275425 | -5.342479074 |
| 1423193_at   | -0.058648979 | 4.008107762 | -0.787647059 | 0.450298778 | 0.450298778 | -5.342508777 |

|              |              |             |              |             |             |              |
|--------------|--------------|-------------|--------------|-------------|-------------|--------------|
| 1438007_at   | -0.095095488 | 5.532461928 | -0.787642074 | 0.450301556 | 0.450301556 | -5.34251231  |
| 1460639_a_at | -0.055983824 | 10.03839709 | -0.787593074 | 0.450328865 | 0.450328865 | -5.342547041 |
| 1435591_at   | -0.075969335 | 6.571496362 | -0.787555783 | 0.450349648 | 0.450349648 | -5.34257347  |
| 1459825_x_at | -0.068386951 | 9.136911985 | -0.787483933 | 0.450389694 | 0.450389694 | -5.34262439  |
| 1459582_at   | -0.067933046 | 3.690021796 | -0.78745686  | 0.450404784 | 0.450404784 | -5.342643576 |
| 1431173_at   | 0.079706499  | 5.503175776 | 0.787450223  | 0.450408483 | 0.450408483 | -5.342648279 |
| 1439885_at   | -0.057303524 | 3.515788608 | -0.787442451 | 0.450412815 | 0.450412815 | -5.342653787 |
| 1445255_at   | 0.069993594  | 4.02753096  | 0.787441764  | 0.450413198 | 0.450413198 | -5.342654273 |
| 1431926_a_at | -0.049539093 | 6.654443655 | -0.78743688  | 0.45041592  | 0.45041592  | -5.342657735 |
| 1444082_at   | -0.067171613 | 3.755369478 | -0.787433545 | 0.450417779 | 0.450417779 | -5.342660098 |
| 1435193_at   | 0.076112171  | 7.199489324 | 0.787428992  | 0.450420317 | 0.450420317 | -5.342663324 |
| 1436794_at   | -0.067413983 | 3.772121781 | -0.78739374  | 0.450439967 | 0.450439967 | -5.342688305 |
| 1440569_at   | -0.061744556 | 3.260758975 | -0.787373633 | 0.450451174 | 0.450451174 | -5.342702552 |
| 1441914_x_at | 0.058483556  | 4.717690079 | 0.787366383  | 0.450455216 | 0.450455216 | -5.34270769  |
| 1454102_at   | -0.087979017 | 4.979180952 | -0.787365854 | 0.450455511 | 0.450455511 | -5.342708065 |
| 1431277_at   | -0.057262103 | 7.057508596 | -0.787357659 | 0.450460079 | 0.450460079 | -5.342713871 |
| 1419431_at   | 0.066925811  | 3.383389811 | 0.787327006  | 0.450477166 | 0.450477166 | -5.342735591 |
| 1425377_at   | 0.096495529  | 4.073330065 | 0.787301978  | 0.450491118 | 0.450491118 | -5.342753325 |
| 1429369_at   | 0.060704205  | 8.79473225  | 0.78725153   | 0.450519241 | 0.450519241 | -5.342789067 |
| 1423189_at   | 0.055854658  | 9.72990986  | 0.787240997  | 0.450525113 | 0.450525113 | -5.34279653  |
| 1436631_at   | 0.053485503  | 7.221014236 | 0.78710975   | 0.450598284 | 0.450598284 | -5.34288951  |
| 1443794_x_at | -0.090406163 | 6.967669123 | -0.787060416 | 0.45062579  | 0.45062579  | -5.342924457 |
| 1453073_at   | 0.081115886  | 3.753660457 | 0.787032137  | 0.450641558 | 0.450641558 | -5.342944488 |
| 1457087_at   | 0.057907098  | 3.884127903 | 0.787012145  | 0.450652705 | 0.450652705 | -5.342958649 |
| 1458561_at   | 0.062263564  | 4.194420278 | 0.786982855  | 0.450669037 | 0.450669037 | -5.342979394 |
| 1456381_x_at | 0.083616974  | 8.908773462 | 0.786980964  | 0.450670091 | 0.450670091 | -5.342980734 |
| 1430099_at   | -0.053992381 | 3.368067361 | -0.786896575 | 0.450717148 | 0.450717148 | -5.343040502 |
| 1452822_at   | 0.074986218  | 6.630999776 | 0.786884904  | 0.450723656 | 0.450723656 | -5.343048768 |
| 1439074_a_at | -0.056569893 | 7.772971158 | -0.786869949 | 0.450731996 | 0.450731996 | -5.343059359 |
| 1425001_at   | 0.065240093  | 7.070763807 | 0.786861464  | 0.450736728 | 0.450736728 | -5.343065368 |
| 1448994_at   | -0.059720487 | 7.086152312 | -0.786856138 | 0.450739698 | 0.450739698 | -5.34306914  |
| 1452128_a_at | -0.060323445 | 8.78224681  | -0.786830167 | 0.450754181 | 0.450754181 | -5.343087532 |
| 1455830_s_at | -0.048631254 | 3.073011051 | -0.786829188 | 0.450754727 | 0.450754727 | -5.343088225 |
| 1451161_a_at | -0.079789259 | 6.883203368 | -0.786770673 | 0.450787359 | 0.450787359 | -5.343129662 |
| 1446898_at   | -0.059685774 | 5.701604831 | -0.786732662 | 0.450808558 | 0.450808558 | -5.343156578 |
| 1432055_at   | -0.068995583 | 4.831839557 | -0.786725329 | 0.450812648 | 0.450812648 | -5.343161771 |
| 1423648_at   | -0.068579123 | 11.36261536 | -0.78671066  | 0.450820829 | 0.450820829 | -5.343172158 |
| 1437228_at   | -0.067154541 | 6.119682528 | -0.786659477 | 0.450849376 | 0.450849376 | -5.343208398 |
| 1434373_at   | -0.062355353 | 9.152899775 | -0.786595497 | 0.450885061 | 0.450885061 | -5.343253696 |
| 1427305_at   | -0.065306555 | 8.271778652 | -0.786592923 | 0.450886497 | 0.450886497 | -5.343255519 |
| 1438493_at   | -0.083150061 | 5.57740322  | -0.786528271 | 0.450922559 | 0.450922559 | -5.34330129  |
| 1436150_at   | -0.075439812 | 6.899175775 | -0.786490562 | 0.450943594 | 0.450943594 | -5.343327985 |
| 1446936_at   | -0.069249589 | 3.637113269 | -0.786481267 | 0.450948779 | 0.450948779 | -5.343334565 |
| 1422480_at   | -0.057860189 | 11.51349008 | -0.78646827  | 0.450956029 | 0.450956029 | -5.343343765 |
| 1442888_at   | -0.055800303 | 3.503874776 | -0.786413121 | 0.450986793 | 0.450986793 | -5.343382803 |
| 1433995_s_at | -0.052978329 | 10.08752051 | -0.786388809 | 0.451000356 | 0.451000356 | -5.343400012 |
| 1431969_at   | 0.055695365  | 3.658138277 | 0.786337156  | 0.451029173 | 0.451029173 | -5.343436573 |
| 1428583_at   | -0.058076499 | 8.50506886  | -0.786300777 | 0.451049468 | 0.451049468 | -5.34346232  |
| 1430937_at   | -0.088787672 | 5.300248092 | -0.786292412 | 0.451054135 | 0.451054135 | -5.343468241 |
| 1439296_at   | 0.050130466  | 3.586768253 | 0.786283138  | 0.451059309 | 0.451059309 | -5.343474804 |
| 1418093_a_at | -0.074362987 | 4.487575543 | -0.786217504 | 0.451095929 | 0.451095929 | -5.343521255 |
| 1423027_at   | -0.126641106 | 5.126493996 | -0.786104381 | 0.451159048 | 0.451159048 | -5.343601306 |
| 1428925_at   | -0.053525309 | 6.133684405 | -0.786084188 | 0.451170316 | 0.451170316 | -5.343615595 |

|              |              |             |              |             |             |              |
|--------------|--------------|-------------|--------------|-------------|-------------|--------------|
| 1452871_at   | 0.072117786  | 6.513173552 | 0.786043318  | 0.451193122 | 0.451193122 | -5.343644514 |
| 1429205_at   | 0.075997249  | 8.851481408 | 0.785897878  | 0.451274286 | 0.451274286 | -5.343747413 |
| 1426325_at   | 0.059313478  | 4.49210518  | 0.785871757  | 0.451288864 | 0.451288864 | -5.343765892 |
| 1441461_at   | -0.075197946 | 7.493127371 | -0.78583673  | 0.451308413 | 0.451308413 | -5.34379067  |
| 1447965_at   | -0.051834035 | 7.065722629 | -0.785742949 | 0.451360756 | 0.451360756 | -5.343857008 |
| 1448040_at   | -0.087818269 | 5.554899972 | -0.785714738 | 0.451376503 | 0.451376503 | -5.343876962 |
| 1439598_at   | -0.057068447 | 6.645266779 | -0.785709771 | 0.451379275 | 0.451379275 | -5.343880474 |
| 1424079_x_at | -0.051161531 | 7.279585645 | -0.78563556  | 0.451420699 | 0.451420699 | -5.343932962 |
| 1427393_at   | -0.078812767 | 3.668643748 | -0.785588358 | 0.451447049 | 0.451447049 | -5.343966344 |
| 1456879_at   | -0.057390596 | 7.67254974  | -0.78551552  | 0.451487711 | 0.451487711 | -5.344017854 |
| 1453493_at   | -0.071146216 | 3.313345462 | -0.785478136 | 0.451508581 | 0.451508581 | -5.344044289 |
| 1440561_at   | -0.069878105 | 3.75869859  | -0.78547581  | 0.45150988  | 0.45150988  | -5.344045934 |
| 1432000_a_at | -0.065259224 | 7.208168058 | -0.78546574  | 0.451515502 | 0.451515502 | -5.344053055 |
| 1426065_a_at | -0.055016269 | 5.500713519 | -0.785459166 | 0.451519172 | 0.451519172 | -5.344057703 |
| 1434651_a_at | -0.099701676 | 7.642782951 | -0.785411479 | 0.451545796 | 0.451545796 | -5.344091423 |
| 1431904_at   | 0.069624488  | 3.848696583 | 0.785322671  | 0.45159538  | 0.45159538  | -5.344154212 |
| 1438368_a_at | 0.073453909  | 12.10627661 | 0.785315415  | 0.451599431 | 0.451599431 | -5.344159342 |
| 1441078_at   | -0.06098678  | 3.6519168   | -0.785262059 | 0.451629224 | 0.451629224 | -5.344197064 |
| 1425522_at   | 0.180407642  | 7.044507526 | 0.785220413  | 0.451652479 | 0.451652479 | -5.344226506 |
| 1420654_a_at | 0.064019988  | 5.374186171 | 0.785178507  | 0.45167588  | 0.45167588  | -5.344256129 |
| 1443610_at   | -0.073541028 | 3.536818033 | -0.785126506 | 0.451704919 | 0.451704919 | -5.344292887 |
| 1427829_at   | -0.068544684 | 4.348452359 | -0.785120097 | 0.451708498 | 0.451708498 | -5.344297417 |
| 1460563_at   | -0.059785254 | 9.606662488 | -0.785049302 | 0.451748034 | 0.451748034 | -5.344347456 |
| 1455207_at   | -0.066927944 | 7.76584567  | -0.784948726 | 0.451804206 | 0.451804206 | -5.344418538 |
| 1430782_at   | 0.079469246  | 7.067992937 | 0.784933018  | 0.451812979 | 0.451812979 | -5.344429639 |
| 1446663_at   | 0.101862418  | 3.857522868 | 0.784893223  | 0.451835206 | 0.451835206 | -5.344457762 |
| 1447187_at   | -0.095376449 | 6.437502102 | -0.784835173 | 0.451867631 | 0.451867631 | -5.344498782 |
| 1444293_at   | -0.090580389 | 3.923397766 | -0.784822156 | 0.451874902 | 0.451874902 | -5.344507981 |
| 1419835_s_at | -0.072635517 | 9.612259605 | -0.784775292 | 0.45190108  | 0.45190108  | -5.344541094 |
| 1449787_at   | -0.054957296 | 4.920944755 | -0.78471967  | 0.451932151 | 0.451932151 | -5.344580394 |
| 1449352_at   | -0.096773324 | 5.472336213 | -0.784709164 | 0.45193802  | 0.45193802  | -5.344587817 |
| 1442107_at   | 0.050311157  | 7.551272005 | 0.784699091  | 0.451943647 | 0.451943647 | -5.344594934 |
| 1458283_at   | -0.066002307 | 4.215876433 | -0.784593566 | 0.4520026   | 0.4520026   | -5.344669485 |
| 1424781_at   | 0.058979022  | 9.442751351 | 0.784589327  | 0.452004969 | 0.452004969 | -5.344672479 |
| 1432960_at   | -0.053737489 | 3.658161137 | -0.784529219 | 0.452038551 | 0.452038551 | -5.34471494  |
| 1427181_at   | 0.06686292   | 3.596690317 | 0.784440515  | 0.452088113 | 0.452088113 | -5.344777597 |
| 1451829_a_at | -0.05465705  | 6.487246156 | -0.78429716  | 0.452168218 | 0.452168218 | -5.344878843 |
| 1429009_at   | -0.076546331 | 9.249339836 | -0.784231534 | 0.452204893 | 0.452204893 | -5.344925186 |
| 1453475_at   | 0.061262102  | 7.277590603 | 0.784229057  | 0.452206276 | 0.452206276 | -5.344926935 |
| 1432311_at   | -0.064381661 | 5.247374877 | -0.784224804 | 0.452208653 | 0.452208653 | -5.344929938 |
| 1427415_at   | 0.056393558  | 3.554678489 | 0.784188408  | 0.452228994 | 0.452228994 | -5.344955639 |
| 1438993_a_at | 0.093954252  | 9.365604945 | 0.784184609  | 0.452231117 | 0.452231117 | -5.344958322 |
| 1423390_at   | 0.055379149  | 9.065154143 | 0.784074394  | 0.452292716 | 0.452292716 | -5.345036142 |
| 1441399_at   | -0.063511379 | 3.658246424 | -0.784027024 | 0.452319192 | 0.452319192 | -5.345069586 |
| 1433140_a_at | -0.082675708 | 4.909102431 | -0.784015886 | 0.452325418 | 0.452325418 | -5.345077449 |
| 1426077_at   | 0.07011175   | 3.883225738 | 0.784002726  | 0.452332774 | 0.452332774 | -5.34508674  |
| 1448802_at   | 0.048498932  | 7.727547267 | 0.783992575  | 0.452338447 | 0.452338447 | -5.345093906 |
| 1421876_at   | -0.050998721 | 8.151381201 | -0.783988137 | 0.452340929 | 0.452340929 | -5.345097039 |
| 1445867_at   | -0.076469522 | 6.82497142  | -0.783986373 | 0.452341914 | 0.452341914 | -5.345098285 |
| 1449092_at   | 0.054014438  | 7.130893194 | 0.783819111  | 0.452435414 | 0.452435414 | -5.345216354 |
| 1439860_at   | -0.086614211 | 6.868475316 | -0.783783261 | 0.452455456 | 0.452455456 | -5.345241659 |
| 1423781_at   | 0.059319437  | 10.6528951  | 0.783776841  | 0.452459045 | 0.452459045 | -5.34524619  |
| 1424666_at   | 0.107824735  | 9.02892157  | 0.783637793  | 0.452536785 | 0.452536785 | -5.345344323 |

|              |              |             |              |             |             |              |
|--------------|--------------|-------------|--------------|-------------|-------------|--------------|
| 1455318_at   | -0.052253806 | 3.81757063  | -0.78362966  | 0.452541333 | 0.452541333 | -5.345350062 |
| 1448653_at   | 0.049361156  | 9.60774434  | 0.783604086  | 0.452555632 | 0.452555632 | -5.345368109 |
| 1437384_at   | -0.070941277 | 4.54945491  | -0.783582547 | 0.452567675 | 0.452567675 | -5.345383308 |
| 1438463_x_at | -0.057141313 | 8.771789634 | -0.783557046 | 0.452581934 | 0.452581934 | -5.345401303 |
| 1437618_x_at | -0.056789783 | 6.621121334 | -0.783539253 | 0.452591883 | 0.452591883 | -5.345413858 |
| 1422110_at   | -0.067753485 | 5.247604715 | -0.783487598 | 0.452620768 | 0.452620768 | -5.345450306 |
| 1439605_at   | -0.059402935 | 5.074436018 | -0.783458521 | 0.452637027 | 0.452637027 | -5.345470821 |
| 1441084_at   | -0.069945754 | 4.067966125 | -0.783439147 | 0.452647861 | 0.452647861 | -5.345484491 |
| 1421731_a_at | 0.048959728  | 8.816675043 | 0.783423495  | 0.452656614 | 0.452656614 | -5.345495534 |
| 1449320_at   | -0.060918362 | 3.340282647 | -0.783390607 | 0.452675006 | 0.452675006 | -5.345518737 |
| 1430722_at   | 0.075230058  | 4.80392917  | 0.783347303  | 0.452699223 | 0.452699223 | -5.345549287 |
| 1456311_x_at | 0.097853126  | 3.704861224 | 0.783258858  | 0.452748688 | 0.452748688 | -5.345611679 |
| 1459038_at   | 0.080333333  | 3.607145225 | 0.783242536  | 0.452757817 | 0.452757817 | -5.345623193 |
| 1432951_at   | 0.057721931  | 3.88422141  | 0.783230252  | 0.452764688 | 0.452764688 | -5.345631858 |
| 1421741_at   | 0.067460596  | 3.127783947 | 0.78318889   | 0.452787822 | 0.452787822 | -5.345661033 |
| 1459806_x_at | -0.075091603 | 4.37737422  | -0.783187346 | 0.452788686 | 0.452788686 | -5.345662122 |
| 1456261_at   | 0.117399093  | 4.114819178 | 0.783136933  | 0.452816883 | 0.452816883 | -5.345697679 |
| 1458037_at   | -0.08073098  | 5.879395283 | -0.783101691 | 0.452836596 | 0.452836596 | -5.345722535 |
| 1436679_at   | -0.053219938 | 4.013473263 | -0.783065177 | 0.452857022 | 0.452857022 | -5.345748288 |
| 1456580_s_at | 0.04898754   | 12.19143822 | 0.783061682  | 0.452858977 | 0.452858977 | -5.345750753 |
| 1429428_at   | -0.110640575 | 8.707676634 | -0.783038547 | 0.452871918 | 0.452871918 | -5.345767068 |
| 1455004_at   | 0.054591286  | 3.485618074 | 0.78294187   | 0.452926001 | 0.452926001 | -5.345835244 |
| 1457128_at   | 0.064451083  | 7.097110771 | 0.78288098   | 0.452960066 | 0.452960066 | -5.34587818  |
| 1438908_at   | -0.104350235 | 6.574842841 | -0.78283548  | 0.452985522 | 0.452985522 | -5.345910261 |
| 1448721_at   | 0.052559928  | 6.151856678 | 0.782704846  | 0.453058614 | 0.453058614 | -5.346002361 |
| 1456176_x_at | 0.04875383   | 9.726719702 | 0.782649081  | 0.453089817 | 0.453089817 | -5.346041672 |
| 1445663_at   | -0.069072347 | 3.715200322 | -0.78264044  | 0.453094652 | 0.453094652 | -5.346047763 |
| 1450833_at   | 0.09131118   | 5.015122527 | 0.782609798  | 0.453111799 | 0.453111799 | -5.346069364 |
| 1426323_x_at | 0.0620178    | 9.741304525 | 0.782566871  | 0.453135821 | 0.453135821 | -5.346099622 |
| 1456389_at   | 0.09197282   | 8.069326459 | 0.782480831  | 0.453183972 | 0.453183972 | -5.346160266 |
| 1429863_at   | -0.050978928 | 4.873219437 | -0.782431218 | 0.453211738 | 0.453211738 | -5.346195232 |
| 1432510_at   | -0.05815225  | 3.444405706 | -0.782423782 | 0.4532159   | 0.4532159   | -5.346200472 |
| 1443155_at   | 0.124109866  | 6.397490795 | 0.782420289  | 0.453217855 | 0.453217855 | -5.346202934 |
| 1421288_at   | 0.0635347    | 4.017021688 | 0.782393511  | 0.453232842 | 0.453232842 | -5.346221806 |
| 1442225_at   | -0.093445133 | 4.615443469 | -0.782278284 | 0.453297336 | 0.453297336 | -5.346303005 |
| 1416588_at   | 0.051936922  | 5.969408874 | 0.782244638  | 0.453316169 | 0.453316169 | -5.346326712 |
| 1446432_at   | -0.087301705 | 5.529072923 | -0.782226957 | 0.453326067 | 0.453326067 | -5.346339171 |
| 1422071_at   | 0.071361656  | 3.58453391  | 0.782160019  | 0.453363537 | 0.453363537 | -5.346386333 |
| 1426359_at   | 0.070172073  | 10.90675716 | 0.782158356  | 0.453364468 | 0.453364468 | -5.346387505 |
| 1432243_a_at | -0.052123982 | 4.266873669 | -0.782138481 | 0.453375594 | 0.453375594 | -5.346401508 |
| 1458223_at   | -0.076088965 | 5.697541842 | -0.782117492 | 0.453387343 | 0.453387343 | -5.346416295 |
| 1443549_at   | -0.07101943  | 4.494080805 | -0.782113413 | 0.453389627 | 0.453389627 | -5.346419169 |
| 1420828_s_at | 0.04809568   | 11.9711009  | 0.782072431  | 0.45341257  | 0.45341257  | -5.34644804  |
| 1458941_at   | 0.063551533  | 8.136919107 | 0.782065849  | 0.453416254 | 0.453416254 | -5.346452677 |
| 1422202_at   | 0.068172553  | 4.289022121 | 0.782032061  | 0.453435171 | 0.453435171 | -5.346476479 |
| 1423614_at   | 0.058862828  | 6.51791568  | 0.782017067  | 0.453443565 | 0.453443565 | -5.346487041 |
| 1428876_at   | -0.062535406 | 10.27376341 | -0.781965731 | 0.453472306 | 0.453472306 | -5.346523203 |
| 1439166_at   | 0.052377193  | 6.554823982 | 0.781831693  | 0.453547356 | 0.453547356 | -5.346617613 |
| 1450282_at   | -0.074046848 | 5.874781814 | -0.781791965 | 0.453569602 | 0.453569602 | -5.346645592 |
| 1420280_x_at | -0.06413773  | 3.393952696 | -0.781721966 | 0.453608799 | 0.453608799 | -5.346694888 |
| 1426950_at   | 0.128881978  | 6.815115149 | 0.781696212  | 0.453623222 | 0.453623222 | -5.346713024 |
| 1434119_at   | -0.053695549 | 8.095562247 | -0.781564692 | 0.453696877 | 0.453696877 | -5.346805632 |
| 1442361_at   | 0.047943194  | 3.756615066 | 0.781558256  | 0.453700482 | 0.453700482 | -5.346810164 |



|              |              |             |              |             |             |              |
|--------------|--------------|-------------|--------------|-------------|-------------|--------------|
| 1416083_at   | 0.053014238  | 10.84266229 | 0.781463147  | 0.453753752 | 0.453753752 | -5.346877125 |
| 1445695_at   | -0.086953785 | 6.20059208  | -0.781442077 | 0.453765553 | 0.453765553 | -5.346891958 |
| 1415857_at   | 0.107145561  | 8.776459809 | 0.781426136  | 0.453774482 | 0.453774482 | -5.34690318  |
| 1447244_at   | -0.066886102 | 3.479376948 | -0.781421106 | 0.4537773   | 0.4537773   | -5.346906721 |
| 1419897_at   | 0.077647972  | 4.536923897 | 0.781360201  | 0.453811415 | 0.453811415 | -5.346949595 |
| 1449605_at   | 0.053658319  | 4.102934702 | 0.781335966  | 0.45382499  | 0.45382499  | -5.346966654 |
| 1431505_at   | -0.064386142 | 3.671729223 | -0.781327674 | 0.453829635 | 0.453829635 | -5.346972491 |
| 1443401_at   | 0.076708806  | 4.37648783  | 0.781326093  | 0.453830521 | 0.453830521 | -5.346973604 |
| 1417376_a_at | -0.118913805 | 9.524461363 | -0.781135756 | 0.453937151 | 0.453937151 | -5.347107569 |
| 1459668_at   | 0.048621872  | 4.757500207 | 0.781038217  | 0.4539918   | 0.4539918   | -5.347176208 |
| 1436155_at   | -0.119292801 | 4.863521194 | -0.780975845 | 0.454026748 | 0.454026748 | -5.347220097 |
| 1436819_at   | 0.089123552  | 7.886679308 | 0.7809614    | 0.454034842 | 0.454034842 | -5.34723026  |
| 1452524_a_at | 0.104692812  | 5.30369079  | 0.780956257  | 0.454037724 | 0.454037724 | -5.347233879 |
| 1424210_at   | 0.056270623  | 9.189279865 | 0.780955086  | 0.45403838  | 0.45403838  | -5.347234703 |
| 1445136_at   | -0.089233965 | 4.26501495  | -0.78092017  | 0.454057946 | 0.454057946 | -5.34725927  |
| 1431270_a_at | 0.071850353  | 6.510793791 | 0.780919345  | 0.454058408 | 0.454058408 | -5.34725985  |
| 1435168_at   | 0.068337973  | 7.206198231 | 0.780911123  | 0.454063015 | 0.454063015 | -5.347265636 |
| 1446920_at   | 0.073314174  | 5.689943988 | 0.780782731  | 0.454134965 | 0.454134965 | -5.347355963 |
| 1458295_at   | 0.066152151  | 6.056695443 | 0.780758061  | 0.45414879  | 0.45414879  | -5.347373317 |
| 1449180_at   | -0.057094499 | 7.029329023 | -0.780734467 | 0.454162013 | 0.454162013 | -5.347389915 |
| 1417929_at   | 0.106612027  | 5.188517829 | 0.780716087  | 0.454172315 | 0.454172315 | -5.347402844 |
| 1443847_x_at | 0.100783254  | 7.352273676 | 0.780711426  | 0.454174926 | 0.454174926 | -5.347406122 |
| 1417313_at   | 0.053197311  | 9.786428181 | 0.780518139  | 0.454283263 | 0.454283263 | -5.347542071 |
| 1454892_at   | 0.058893132  | 10.65040808 | 0.780441981  | 0.454325954 | 0.454325954 | -5.347595628 |
| 1425647_at   | -0.060999304 | 3.216224196 | -0.780441491 | 0.454326229 | 0.454326229 | -5.347595973 |
| 1433543_at   | 0.060313995  | 9.77869397  | 0.780425801  | 0.454335025 | 0.454335025 | -5.347607006 |
| 1437062_s_at | -0.072488729 | 3.452567712 | -0.780396921 | 0.454351214 | 0.454351214 | -5.347627314 |
| 1450715_at   | 0.074562495  | 4.648731198 | 0.780395835  | 0.454351823 | 0.454351823 | -5.347628078 |
| 1425220_x_at | 0.070587062  | 4.654800244 | 0.780345585  | 0.454379993 | 0.454379993 | -5.347663411 |
| 1427014_at   | -0.071365806 | 7.79211641  | -0.780313387 | 0.454398044 | 0.454398044 | -5.347686051 |
| 1438162_x_at | 0.055072524  | 3.179659595 | 0.780307254  | 0.454401483 | 0.454401483 | -5.347690363 |
| 1417803_at   | -0.112273642 | 4.862433597 | -0.780244733 | 0.454436535 | 0.454436535 | -5.347734321 |
| 1428311_at   | 0.06672647   | 9.125786482 | 0.780244106  | 0.454436887 | 0.454436887 | -5.347734761 |
| 1434181_at   | 0.053935809  | 9.263251824 | 0.780236533  | 0.454441133 | 0.454441133 | -5.347740086 |
| 1416554_at   | 0.056349717  | 9.250302933 | 0.780207908  | 0.454457182 | 0.454457182 | -5.347760211 |
| 1430520_at   | -0.090844353 | 6.665284562 | -0.780162391 | 0.454482703 | 0.454482703 | -5.347792209 |
| 1424764_at   | 0.12289811   | 5.725507914 | 0.780143079  | 0.454493532 | 0.454493532 | -5.347805786 |
| 1434098_at   | 0.059973624  | 3.21369203  | 0.780108705  | 0.454512806 | 0.454512806 | -5.347829949 |
| 1444235_at   | 0.070583924  | 8.114063617 | 0.780091706  | 0.454522337 | 0.454522337 | -5.347841899 |
| 1418685_at   | 0.084500094  | 6.581739981 | 0.780037073  | 0.454552973 | 0.454552973 | -5.347880301 |
| 1450960_at   | -0.066488229 | 4.201485189 | -0.780002498 | 0.454572361 | 0.454572361 | -5.347904604 |
| 1433630_at   | 0.082287191  | 4.182955613 | 0.779991246  | 0.454578671 | 0.454578671 | -5.347912513 |
| 1421437_x_at | 0.081818747  | 3.57718251  | 0.779933794  | 0.45461089  | 0.45461089  | -5.347952892 |
| 1448987_at   | -0.056009612 | 9.432254042 | -0.779921217 | 0.454617943 | 0.454617943 | -5.347961731 |
| 1422169_a_at | -0.058228191 | 5.898958708 | -0.779901937 | 0.454628756 | 0.454628756 | -5.347975282 |
| 1422258_at   | 0.076014916  | 3.897109836 | 0.779887673  | 0.454636755 | 0.454636755 | -5.347985306 |
| 1427550_at   | -0.104295628 | 4.467290981 | -0.779862668 | 0.454650779 | 0.454650779 | -5.348002879 |
| 1429510_at   | -0.070417957 | 7.367965907 | -0.779841639 | 0.454662572 | 0.454662572 | -5.348017657 |
| 1458178_at   | -0.055715566 | 5.837543123 | -0.779809573 | 0.454680557 | 0.454680557 | -5.348040191 |
| 1449439_at   | 0.075539256  | 8.294946178 | 0.77965455   | 0.454767509 | 0.454767509 | -5.34814912  |
| 1432829_at   | -0.074070273 | 4.553589275 | -0.779632363 | 0.454779955 | 0.454779955 | -5.348164709 |
| 1416296_at   | 0.07825428   | 6.537004807 | 0.779584578  | 0.45480676  | 0.45480676  | -5.34819828  |
| 1417510_at   | -0.050798353 | 9.075767985 | -0.779580786 | 0.454808887 | 0.454808887 | -5.348200945 |

|              |              |             |              |             |             |              |
|--------------|--------------|-------------|--------------|-------------|-------------|--------------|
| 1425308_at   | -0.062340564 | 3.498259425 | -0.779559923 | 0.45482059  | 0.45482059  | -5.348215601 |
| 1424910_at   | -0.064785497 | 4.334466137 | -0.779554738 | 0.454823499 | 0.454823499 | -5.348219244 |
| 1446320_at   | -0.063427159 | 3.941084843 | -0.779549607 | 0.454826377 | 0.454826377 | -5.348222849 |
| 1455321_at   | 0.069016346  | 5.703218873 | 0.779465403  | 0.454873616 | 0.454873616 | -5.348282001 |
| 1456089_at   | 0.090278686  | 6.237065574 | 0.77943033   | 0.454893293 | 0.454893293 | -5.348306638 |
| 1417928_at   | 0.071781923  | 9.740944949 | 0.779418602  | 0.454899872 | 0.454899872 | -5.348314876 |
| 1441296_at   | -0.066837488 | 5.574486502 | -0.779370033 | 0.454927122 | 0.454927122 | -5.348348991 |
| 1450961_a_at | 0.066045431  | 8.121694076 | 0.779358543  | 0.454933569 | 0.454933569 | -5.348357061 |
| 1425472_a_at | -0.084449072 | 9.753847627 | -0.779342359 | 0.454942649 | 0.454942649 | -5.348368428 |
| 1432915_at   | -0.06679073  | 4.303357244 | -0.77932982  | 0.454949685 | 0.454949685 | -5.348377235 |
| 1454642_a_at | -0.078642141 | 8.925641624 | -0.779280738 | 0.454977224 | 0.454977224 | -5.348411707 |
| 1427235_at   | -0.184739995 | 8.254967733 | -0.779261694 | 0.45498791  | 0.45498791  | -5.348425081 |
| 1453374_at   | 0.075702791  | 4.58539901  | 0.779221764  | 0.455010315 | 0.455010315 | -5.348453124 |
| 1455458_x_at | -0.050088723 | 8.452483699 | -0.779182133 | 0.455032554 | 0.455032554 | -5.348480954 |
| 1449864_at   | 0.084415848  | 3.952667128 | 0.779128602  | 0.455062593 | 0.455062593 | -5.348518545 |
| 1427089_at   | 0.067306006  | 8.861608952 | 0.77899939   | 0.455135107 | 0.455135107 | -5.34860927  |
| 1459155_at   | -0.057812189 | 3.970984555 | -0.778987027 | 0.455142046 | 0.455142046 | -5.34861795  |
| 1440698_at   | -0.177514657 | 5.574721214 | -0.778927322 | 0.455175555 | 0.455175555 | -5.348659866 |
| 1424973_at   | -0.066705779 | 3.338250892 | -0.778888094 | 0.455197572 | 0.455197572 | -5.348687405 |
| 1458166_at   | 0.058240986  | 4.894307578 | 0.77881665   | 0.455237674 | 0.455237674 | -5.348737558 |
| 1426602_at   | -0.070626213 | 8.362652176 | -0.778814212 | 0.455239042 | 0.455239042 | -5.348739269 |
| 1450263_at   | 0.076032946  | 4.657806367 | 0.778785959  | 0.455254901 | 0.455254901 | -5.348759101 |
| 1445146_at   | -0.078185443 | 4.641628208 | -0.778699483 | 0.455303444 | 0.455303444 | -5.348819798 |
| 1446042_at   | 0.064657352  | 3.288939837 | 0.778691484  | 0.455307935 | 0.455307935 | -5.348825412 |
| 1447494_at   | -0.057763961 | 3.719158049 | -0.778602406 | 0.455357942 | 0.455357942 | -5.348887929 |
| 1425406_at   | 0.057512751  | 4.615922442 | 0.778569951  | 0.455376163 | 0.455376163 | -5.348910705 |
| 1444634_at   | -0.080368833 | 5.388716276 | -0.778511214 | 0.45540914  | 0.45540914  | -5.348951923 |
| 1440034_at   | 0.074962386  | 5.128365401 | 0.77850326   | 0.455413606 | 0.455413606 | -5.348957504 |
| 1446999_at   | 0.051290207  | 4.331949629 | 0.778483616  | 0.455424636 | 0.455424636 | -5.348971288 |
| 1420012_at   | -0.0966852   | 5.915187468 | -0.778456982 | 0.45543959  | 0.45543959  | -5.348989977 |
| 1422409_at   | -0.079929693 | 4.571372807 | -0.778446643 | 0.455445395 | 0.455445395 | -5.348997231 |
| 1438362_x_at | 0.082696213  | 5.047439594 | 0.778441527  | 0.455448268 | 0.455448268 | -5.349000821 |
| 1459498_at   | -0.061099338 | 3.949281741 | -0.778384323 | 0.455480387 | 0.455480387 | -5.349040957 |
| 1437329_at   | -0.079172633 | 6.172822027 | -0.778359337 | 0.455494417 | 0.455494417 | -5.349058488 |
| 1417822_at   | 0.049244107  | 9.539334525 | 0.778354073  | 0.455497373 | 0.455497373 | -5.349062181 |
| 1440965_at   | 0.10765713   | 6.85633304  | 0.778344853  | 0.45550255  | 0.45550255  | -5.349068649 |
| 1456482_at   | -0.049918852 | 8.913006046 | -0.778331301 | 0.45551016  | 0.45551016  | -5.349078157 |
| 1424204_at   | 0.050322374  | 10.62056797 | 0.778305479  | 0.45552466  | 0.45552466  | -5.349096273 |
| 1443199_at   | -0.112020547 | 6.240863711 | -0.778250685 | 0.455555431 | 0.455555431 | -5.349134713 |
| 1455708_at   | -0.076825792 | 5.434950148 | -0.778142737 | 0.455616053 | 0.455616053 | -5.349210435 |
| 1438068_at   | 0.0647779    | 3.595615691 | 0.777997685  | 0.455697522 | 0.455697522 | -5.34931217  |
| 1436923_at   | 0.082182884  | 7.464587803 | 0.777857985  | 0.455775994 | 0.455775994 | -5.349410136 |
| 1438533_at   | -0.064914063 | 6.578269076 | -0.777708472 | 0.455859988 | 0.455859988 | -5.349514967 |
| 1456059_at   | -0.064064935 | 9.905699108 | -0.77769361  | 0.455868338 | 0.455868338 | -5.349525387 |
| 1428085_at   | 0.046568343  | 9.113345019 | 0.777675933  | 0.455878269 | 0.455878269 | -5.349537779 |
| 1445024_at   | -0.069420906 | 5.690321413 | -0.777639363 | 0.455898815 | 0.455898815 | -5.349563416 |
| 1431683_at   | -0.07560524  | 4.436071356 | -0.777565189 | 0.455940491 | 0.455940491 | -5.349615413 |
| 1420059_at   | -0.080232003 | 5.911515264 | -0.777563016 | 0.455941712 | 0.455941712 | -5.349616936 |
| 1453788_at   | 0.053555203  | 4.602166487 | 0.777529344  | 0.455960632 | 0.455960632 | -5.349640539 |
| 1454583_at   | -0.057211015 | 4.460608983 | -0.777485079 | 0.455985505 | 0.455985505 | -5.349671566 |
| 1426273_at   | -0.087689165 | 4.621617896 | -0.777463381 | 0.455997698 | 0.455997698 | -5.349686774 |
| 1455247_at   | -0.098649839 | 9.686832466 | -0.777392073 | 0.456037769 | 0.456037769 | -5.349736752 |
| 1434842_s_at | -0.073206706 | 9.572584702 | -0.777381519 | 0.4560437   | 0.4560437   | -5.349744148 |

|              |              |             |              |             |             |              |
|--------------|--------------|-------------|--------------|-------------|-------------|--------------|
| 1450284_at   | 0.068429694  | 4.368830202 | 0.777380625  | 0.456044202 | 0.456044202 | -5.349744775 |
| 1426142_a_at | -0.065423654 | 3.457400932 | -0.777376555 | 0.45604649  | 0.45604649  | -5.349747628 |
| 1450061_at   | 0.064673045  | 9.316636567 | 0.777317339  | 0.456079768 | 0.456079768 | -5.349789126 |
| 1451666_at   | 0.079526067  | 10.48891698 | 0.777277868  | 0.456101951 | 0.456101951 | -5.349816787 |
| 1445484_at   | 0.053749231  | 3.965507667 | 0.777218272  | 0.456135445 | 0.456135445 | -5.349858547 |
| 1418673_at   | 0.059618816  | 8.819836149 | 0.777168128  | 0.456163629 | 0.456163629 | -5.349893683 |
| 1415984_at   | -0.056802526 | 9.740954902 | -0.777157545 | 0.456169577 | 0.456169577 | -5.349901098 |
| 1460354_a_at | 0.090169772  | 8.903989331 | 0.777151751  | 0.456172833 | 0.456172833 | -5.349905157 |
| 1428800_a_at | 0.077864285  | 8.000825236 | 0.777125354  | 0.45618767  | 0.45618767  | -5.349923652 |
| 1460272_at   | -0.069291692 | 5.18835405  | -0.777088505 | 0.456208383 | 0.456208383 | -5.34994947  |
| 1458835_at   | -0.069495815 | 4.447398214 | -0.777083589 | 0.456211146 | 0.456211146 | -5.349952914 |
| 1438496_a_at | 0.111475712  | 7.78376303  | 0.777074287  | 0.456216375 | 0.456216375 | -5.34995943  |
| 1443005_at   | -0.05888718  | 6.270464643 | -0.777017276 | 0.456248422 | 0.456248422 | -5.349999371 |
| 1429357_at   | 0.081004469  | 4.842546695 | 0.777013131  | 0.456250752 | 0.456250752 | -5.350002275 |
| 1435742_at   | -0.062804191 | 8.10184118  | -0.776937005 | 0.456293546 | 0.456293546 | -5.350055602 |
| 1435832_at   | 0.088554143  | 3.753379675 | 0.776918823  | 0.456303767 | 0.456303767 | -5.350068338 |
| 1446343_at   | 0.073608754  | 4.165614167 | 0.776908268  | 0.456309701 | 0.456309701 | -5.350075732 |
| 1424960_at   | -0.09363408  | 5.837602351 | -0.776902796 | 0.456312778 | 0.456312778 | -5.350079565 |
| 1452835_a_at | -0.071806093 | 8.10726623  | -0.776886861 | 0.456321736 | 0.456321736 | -5.350090726 |
| 1420014_at   | -0.065873007 | 4.725898757 | -0.776874915 | 0.456328452 | 0.456328452 | -5.350099094 |
| 1422537_a_at | -0.070102789 | 9.796796806 | -0.776837293 | 0.456349603 | 0.456349603 | -5.350125446 |
| 1442659_at   | 0.155531733  | 9.329322571 | 0.776831573  | 0.456352819 | 0.456352819 | -5.350129452 |
| 1456783_at   | -0.08692978  | 8.378515136 | -0.776829142 | 0.456354186 | 0.456354186 | -5.350131155 |
| 1450481_at   | -0.092165377 | 3.413279041 | -0.776746989 | 0.456400375 | 0.456400375 | -5.350188692 |
| 1456836_at   | -0.084779409 | 4.250574351 | -0.776708027 | 0.456422282 | 0.456422282 | -5.350215978 |
| 1434534_at   | 0.272761809  | 6.730570909 | 0.776676873  | 0.456439799 | 0.456439799 | -5.350237796 |
| 1450758_at   | 0.065449717  | 3.575390225 | 0.776600321  | 0.456482845 | 0.456482845 | -5.350291402 |
| 1451259_at   | -0.064925795 | 9.194162101 | -0.776592089 | 0.456487473 | 0.456487473 | -5.350297165 |
| 1418217_at   | -0.062026161 | 8.899890886 | -0.776578181 | 0.456495294 | 0.456495294 | -5.350306904 |
| 1436762_x_at | -0.072236971 | 8.592400199 | -0.776572126 | 0.456498699 | 0.456498699 | -5.350311144 |
| 1422463_a_at | 0.070220457  | 7.944981315 | 0.776560768  | 0.456505086 | 0.456505086 | -5.350319097 |
| 1460053_at   | 0.061668034  | 7.228015568 | 0.776490223  | 0.456544757 | 0.456544757 | -5.35036849  |
| 1442617_at   | 0.085102699  | 7.252026861 | 0.776393519  | 0.456599143 | 0.456599143 | -5.350436193 |
| 1422336_at   | -0.059431686 | 4.081821267 | -0.776377143 | 0.456608353 | 0.456608353 | -5.350447657 |
| 1427398_at   | 0.070455283  | 4.476918177 | 0.776376378  | 0.456608784 | 0.456608784 | -5.350448193 |
| 1425821_at   | 0.082331643  | 4.862127394 | 0.776368968  | 0.456612951 | 0.456612951 | -5.35045338  |
| 1447699_at   | 0.050760668  | 4.629983017 | 0.776331268  | 0.456634155 | 0.456634155 | -5.350479772 |
| 1455760_at   | -0.106730363 | 6.730561238 | -0.776329881 | 0.456634935 | 0.456634935 | -5.350480742 |
| 1432567_at   | -0.053878748 | 5.154321525 | -0.776325714 | 0.456637278 | 0.456637278 | -5.350483659 |
| 1434807_s_at | 0.05290598   | 8.73079086  | 0.776276984  | 0.456664687 | 0.456664687 | -5.35051777  |
| 1438004_at   | 0.058713553  | 8.377186777 | 0.776153658  | 0.456734057 | 0.456734057 | -5.350604089 |
| 1454344_at   | -0.054968507 | 3.583719313 | -0.776147537 | 0.4567375   | 0.4567375   | -5.350608373 |
| 1454201_a_at | -0.069292377 | 6.30640183  | -0.776045832 | 0.456794714 | 0.456794714 | -5.35067955  |
| 1428835_at   | -0.08078508  | 7.172444352 | -0.775879962 | 0.456888034 | 0.456888034 | -5.350795614 |
| 1459480_at   | -0.060834879 | 4.449447622 | -0.775849566 | 0.456905137 | 0.456905137 | -5.350816881 |
| 1453889_at   | 0.07778363   | 4.40435238  | 0.775823613  | 0.456919739 | 0.456919739 | -5.350835038 |
| 1437172_x_at | 0.085887111  | 9.185632936 | 0.775754935  | 0.456958384 | 0.456958384 | -5.350883085 |
| 1449929_at   | -0.080107447 | 9.505589844 | -0.775749049 | 0.456961696 | 0.456961696 | -5.350887202 |
| 1433903_at   | -0.131496489 | 9.487067257 | -0.775747918 | 0.456962333 | 0.456962333 | -5.350887994 |
| 1430134_a_at | -0.077844282 | 7.1978821   | -0.775731624 | 0.456971501 | 0.456971501 | -5.350899392 |
| 1418929_at   | -0.056497337 | 9.010251787 | -0.775686056 | 0.456997143 | 0.456997143 | -5.350931268 |
| 1460407_at   | -0.085032914 | 4.403253132 | -0.775677123 | 0.45700217  | 0.45700217  | -5.350937517 |
| 1427835_at   | -0.076980369 | 5.300193478 | -0.775648227 | 0.457018432 | 0.457018432 | -5.35095773  |

|              |              |             |              |             |             |              |
|--------------|--------------|-------------|--------------|-------------|-------------|--------------|
| 1443714_at   | -0.099609865 | 4.064113561 | -0.775579265 | 0.457057241 | 0.457057241 | -5.351005966 |
| 1448684_at   | 0.05165483   | 9.251500015 | 0.775577751  | 0.457058093 | 0.457058093 | -5.351007025 |
| 1432964_at   | 0.062349597  | 4.007860817 | 0.775493936  | 0.457105265 | 0.457105265 | -5.351065645 |
| 1421021_at   | 0.0674852    | 5.037117882 | 0.775417151  | 0.457148482 | 0.457148482 | -5.351119344 |
| 1427968_at   | 0.066062488  | 3.425148512 | 0.775359105  | 0.457181155 | 0.457181155 | -5.351159934 |
| 1428804_at   | 0.076259149  | 6.263507907 | 0.775335303  | 0.457194553 | 0.457194553 | -5.351176578 |
| 1447461_at   | 0.075369398  | 3.624948522 | 0.775327453  | 0.457198971 | 0.457198971 | -5.351182067 |
| 1420729_at   | -0.076891706 | 3.328158335 | -0.775134266 | 0.457307724 | 0.457307724 | -5.351317135 |
| 1439309_at   | -0.060265424 | 4.25766577  | -0.775042634 | 0.457359314 | 0.457359314 | -5.351381191 |
| 1426864_a_at | -0.069117659 | 9.861722958 | -0.775036731 | 0.457362637 | 0.457362637 | -5.351385317 |
| 1439130_at   | 0.086017653  | 3.937804499 | 0.774977195  | 0.457396159 | 0.457396159 | -5.351426932 |
| 1423426_at   | -0.069582683 | 6.114529335 | -0.774925683 | 0.457425163 | 0.457425163 | -5.351462936 |
| 1456986_at   | -0.07011668  | 3.657639178 | -0.77486631  | 0.457458596 | 0.457458596 | -5.351504431 |
| 1419369_at   | -0.091618061 | 6.540138187 | -0.774825481 | 0.457481587 | 0.457481587 | -5.351532965 |
| 1448222_x_at | -0.057219823 | 10.7194762  | -0.774821723 | 0.457483704 | 0.457483704 | -5.351535592 |
| 1451687_a_at | -0.060076206 | 3.937483325 | -0.774770586 | 0.457512501 | 0.457512501 | -5.351571327 |
| 1445412_at   | -0.059745936 | 3.457121162 | -0.774755929 | 0.457520755 | 0.457520755 | -5.351581569 |
| 1457644_s_at | -0.072921031 | 6.572986621 | -0.774751217 | 0.457523408 | 0.457523408 | -5.351584862 |
| 1420945_at   | 0.056133335  | 6.707689611 | 0.774746018  | 0.457526336 | 0.457526336 | -5.351588495 |
| 1427456_at   | -0.070700275 | 9.01277141  | -0.774724703 | 0.45753834  | 0.45753834  | -5.351603389 |
| 1432713_at   | 0.050213543  | 3.932031716 | 0.774682459  | 0.457562131 | 0.457562131 | -5.351632907 |
| 1456013_x_at | 0.062122394  | 8.369930242 | 0.774575499  | 0.457622373 | 0.457622373 | -5.351707639 |
| 1450595_at   | 0.067408092  | 3.821104757 | 0.774571372  | 0.457624697 | 0.457624697 | -5.351710523 |
| 1452243_at   | 0.106592889  | 4.364281149 | 0.774557097  | 0.457632737 | 0.457632737 | -5.351720496 |
| 1432946_at   | -0.081692688 | 4.922624941 | -0.774476426 | 0.457678176 | 0.457678176 | -5.351776852 |
| 1460507_at   | 0.087636278  | 4.316807786 | 0.774387124  | 0.457728481 | 0.457728481 | -5.351839233 |
| 1423878_at   | 0.05413254   | 8.123366306 | 0.774346642  | 0.457751286 | 0.457751286 | -5.351867509 |
| 1418944_at   | 0.052428971  | 4.13294207  | 0.774340005  | 0.457755024 | 0.457755024 | -5.351872145 |
| 1442724_at   | -0.09976133  | 6.111040067 | -0.774303645 | 0.457775508 | 0.457775508 | -5.351897541 |
| 1448464_at   | -0.063145851 | 10.31748165 | -0.774290734 | 0.457782782 | 0.457782782 | -5.351906558 |
| 1440135_at   | 0.090353956  | 3.461608174 | 0.774288865  | 0.457783834 | 0.457783834 | -5.351907863 |
| 1432623_at   | -0.062455446 | 6.771528518 | -0.774263537 | 0.457798104 | 0.457798104 | -5.351925553 |
| 1455706_at   | 0.074475965  | 7.617186456 | 0.774260422  | 0.457799859 | 0.457799859 | -5.351927729 |
| 1448674_at   | 0.060077374  | 8.480896769 | 0.774220692  | 0.457822242 | 0.457822242 | -5.351955476 |
| 1423131_at   | 0.069436859  | 8.296258051 | 0.774176313  | 0.457847246 | 0.457847246 | -5.351986468 |
| 1450919_at   | -0.046734783 | 9.697390837 | -0.774149448 | 0.457862382 | 0.457862382 | -5.352005229 |
| 1447751_x_at | -0.079695788 | 6.196726484 | -0.774084444 | 0.457899009 | 0.457899009 | -5.35205062  |
| 1419896_at   | -0.070013043 | 6.816995381 | -0.774050148 | 0.457918333 | 0.457918333 | -5.352074567 |
| 1439126_at   | 0.092225571  | 7.691342233 | 0.774037255  | 0.457925598 | 0.457925598 | -5.35208357  |
| 1453324_at   | -0.068909025 | 5.732650603 | -0.773997921 | 0.457947762 | 0.457947762 | -5.352111033 |
| 1447058_at   | -0.094700403 | 3.258411592 | -0.77397761  | 0.457959208 | 0.457959208 | -5.352125214 |
| 1460241_a_at | 0.060060723  | 6.786466283 | 0.773960535  | 0.45796883  | 0.45796883  | -5.352137136 |
| 1433230_at   | 0.087544788  | 4.029442281 | 0.773926279  | 0.457988134 | 0.457988134 | -5.352161052 |
| 1421664_a_at | 0.063041251  | 9.112221703 | 0.773801264  | 0.458058588 | 0.458058588 | -5.352248324 |
| 1443789_x_at | -0.099657744 | 5.562521776 | -0.773788312 | 0.458065888 | 0.458065888 | -5.352257365 |
| 1451387_s_at | -0.048113334 | 8.914569813 | -0.773721401 | 0.458103599 | 0.458103599 | -5.35230407  |
| 1419734_at   | -0.083443504 | 8.956847186 | -0.773711012 | 0.458109455 | 0.458109455 | -5.352311321 |
| 1449913_at   | 0.08862533   | 5.127889015 | 0.773708931  | 0.458110628 | 0.458110628 | -5.352312774 |
| 1438997_at   | 0.067886763  | 4.509541245 | 0.773707212  | 0.458111597 | 0.458111597 | -5.352313973 |
| 1419357_at   | -0.05495079  | 7.76925615  | -0.773662431 | 0.458136837 | 0.458136837 | -5.352345229 |
| 1456196_x_at | 0.052873521  | 11.68063643 | 0.773623022  | 0.45815905  | 0.45815905  | -5.352372733 |
| 1437335_x_at | -0.048675758 | 9.364250147 | -0.773573795 | 0.458186799 | 0.458186799 | -5.352407088 |
| 1420281_at   | -0.059299422 | 2.960342285 | -0.773509532 | 0.458223024 | 0.458223024 | -5.352451933 |

|              |              |             |              |             |             |              |
|--------------|--------------|-------------|--------------|-------------|-------------|--------------|
| 1419054_a_at | -0.095927741 | 6.515051624 | -0.773409583 | 0.45827937  | 0.45827937  | -5.352521676 |
| 1423923_a_at | -0.080827727 | 7.387198232 | -0.773352333 | 0.458311647 | 0.458311647 | -5.35256162  |
| 1431265_at   | 0.060473864  | 4.060904139 | 0.773315528  | 0.458332397 | 0.458332397 | -5.352587298 |
| 1428052_a_at | 0.046886867  | 8.60311216  | 0.773281307  | 0.458351691 | 0.458351691 | -5.352611172 |
| 1452526_a_at | 0.062524911  | 3.372663573 | 0.773266584  | 0.458359993 | 0.458359993 | -5.352621444 |
| 1450844_at   | 0.046560567  | 8.646540235 | 0.773256182  | 0.458365858 | 0.458365858 | -5.3526287   |
| 1418076_at   | 0.055158111  | 7.047761784 | 0.773250386  | 0.458369126 | 0.458369126 | -5.352632744 |
| 1434034_at   | -0.079001435 | 7.472009166 | -0.773244241 | 0.458372591 | 0.458372591 | -5.352637031 |
| 1440471_x_at | 0.053471141  | 3.513806613 | 0.77323072   | 0.458380215 | 0.458380215 | -5.352646463 |
| 1453672_at   | -0.055616642 | 5.131977322 | -0.773217562 | 0.458387634 | 0.458387634 | -5.352655642 |
| 1443964_at   | -0.062726903 | 4.254283083 | -0.773212736 | 0.458390355 | 0.458390355 | -5.352659008 |
| 1417084_at   | 0.118212246  | 8.078165433 | 0.773204296  | 0.458395114 | 0.458395114 | -5.352664896 |
| 1427769_x_at | -0.054278031 | 5.613983254 | -0.77317675  | 0.458410646 | 0.458410646 | -5.352684111 |
| 1431258_at   | 0.097769715  | 5.030765722 | 0.77315151   | 0.458424879 | 0.458424879 | -5.352701718 |
| 1433138_at   | 0.083499629  | 5.982098664 | 0.773130122  | 0.458436939 | 0.458436939 | -5.352716637 |
| 1433441_at   | 0.061600893  | 9.097767417 | 0.773113955  | 0.458446056 | 0.458446056 | -5.352727913 |
| 1454676_s_at | -0.072226638 | 7.058394362 | -0.773022008 | 0.458497906 | 0.458497906 | -5.352792043 |
| 1419587_s_at | 0.056878892  | 5.681438771 | 0.773015667  | 0.458501483 | 0.458501483 | -5.352796466 |
| 1440193_at   | 0.069571514  | 8.868632354 | 0.773008531  | 0.458505507 | 0.458505507 | -5.352801443 |
| 1459506_at   | -0.051754193 | 3.736618235 | -0.772980346 | 0.458521402 | 0.458521402 | -5.352821099 |
| 1421954_at   | 0.089440153  | 7.632252695 | 0.772963436  | 0.458530939 | 0.458530939 | -5.352832893 |
| 1436211_at   | 0.066740388  | 6.352950064 | 0.772916779  | 0.458557252 | 0.458557252 | -5.35286543  |
| 1439668_at   | 0.063505862  | 3.660254748 | 0.772898311  | 0.458567668 | 0.458567668 | -5.352878308 |
| 1442203_at   | 0.070861554  | 5.893737342 | 0.772869087  | 0.458584151 | 0.458584151 | -5.352898687 |
| 1457162_at   | 0.059554666  | 5.403528233 | 0.772837056  | 0.458602217 | 0.458602217 | -5.352921023 |
| 1452425_at   | -0.065585731 | 4.468037874 | -0.772747426 | 0.458652773 | 0.458652773 | -5.352983518 |
| 1439951_at   | 0.063103171  | 3.645600464 | 0.772677379  | 0.458692285 | 0.458692285 | -5.353032355 |
| 1457226_at   | 0.069907082  | 5.148018473 | 0.772673355  | 0.458694555 | 0.458694555 | -5.35303516  |
| 1436489_x_at | 0.051884807  | 7.431293725 | 0.772665705  | 0.45869887  | 0.45869887  | -5.353040493 |
| 1437545_at   | -0.050540365 | 9.725264271 | -0.772605689 | 0.458732726 | 0.458732726 | -5.353082333 |
| 1427563_at   | -0.089848782 | 3.875615365 | -0.772574563 | 0.458750285 | 0.458750285 | -5.35310403  |
| 1423399_a_at | -0.05731149  | 8.564273783 | -0.772559042 | 0.458759042 | 0.458759042 | -5.35311485  |
| 1455309_at   | -0.05669206  | 10.1079242  | -0.772554793 | 0.458761439 | 0.458761439 | -5.353117812 |
| 1449384_at   | -0.058475225 | 4.396314091 | -0.772550393 | 0.458763921 | 0.458763921 | -5.353120879 |
| 1438264_a_at | 0.052071716  | 9.001016416 | 0.772415652  | 0.45883994  | 0.45883994  | -5.353214796 |
| 1451004_at   | 0.065064294  | 7.28759104  | 0.772360921  | 0.458870821 | 0.458870821 | -5.35325294  |
| 1418968_at   | 0.066184987  | 8.695727897 | 0.772296774  | 0.458907017 | 0.458907017 | -5.353297644 |
| 1458977_at   | 0.05834926   | 3.175454634 | 0.772183363  | 0.458971014 | 0.458971014 | -5.353376672 |
| 1432177_a_at | 0.064847768  | 8.542318426 | 0.772157087  | 0.458985843 | 0.458985843 | -5.35339498  |
| 1415891_at   | -0.054192629 | 10.41982562 | -0.77212699  | 0.459002828 | 0.459002828 | -5.353415951 |
| 1456391_at   | -0.050164673 | 4.261762009 | -0.772117362 | 0.459008262 | 0.459008262 | -5.353422659 |
| 1433706_a_at | 0.084579377  | 10.77608984 | 0.772093936  | 0.459021482 | 0.459021482 | -5.35343898  |
| 1454780_at   | 0.073787423  | 7.084550388 | 0.772080627  | 0.459028993 | 0.459028993 | -5.353448253 |
| 1421601_at   | 0.071294558  | 4.370619196 | 0.772044799  | 0.459049214 | 0.459049214 | -5.353473213 |
| 1450121_at   | -0.051771986 | 3.995930527 | -0.771913021 | 0.459123591 | 0.459123591 | -5.353565013 |
| 1431812_a_at | -0.057279889 | 6.8567417   | -0.771877905 | 0.459143413 | 0.459143413 | -5.353589473 |
| 1441831_x_at | -0.126674681 | 5.540873785 | -0.771777728 | 0.459199961 | 0.459199961 | -5.353659248 |
| 1424249_a_at | -0.069975938 | 6.535733138 | -0.771719181 | 0.459233012 | 0.459233012 | -5.353700022 |
| 1422353_at   | 0.060986428  | 3.758537802 | 0.77169509   | 0.459246612 | 0.459246612 | -5.353716799 |
| 1433596_at   | 0.113679268  | 6.325095324 | 0.771668839  | 0.459261432 | 0.459261432 | -5.35373508  |
| 1457784_at   | -0.053453438 | 4.388835588 | -0.771637739 | 0.459278991 | 0.459278991 | -5.353756738 |
| 1428011_a_at | 0.096045646  | 9.649032007 | 0.771600993  | 0.459299736 | 0.459299736 | -5.353782325 |
| 1432014_at   | -0.056659863 | 4.291390276 | -0.771559555 | 0.459323132 | 0.459323132 | -5.353811179 |

|              |              |             |              |             |             |              |
|--------------|--------------|-------------|--------------|-------------|-------------|--------------|
| 1425871_a_at | -0.075895632 | 3.649850267 | -0.771467801 | 0.459374939 | 0.459374939 | -5.353875064 |
| 1419456_at   | -0.101215535 | 7.496796856 | -0.77143117  | 0.459395623 | 0.459395623 | -5.353900567 |
| 1456479_at   | -0.078366869 | 7.699927646 | -0.771344647 | 0.459444481 | 0.459444481 | -5.353960801 |
| 1447546_s_at | -0.094287765 | 5.05158149  | -0.771334032 | 0.459450476 | 0.459450476 | -5.35396819  |
| 1434409_at   | -0.054315561 | 7.684648603 | -0.771321361 | 0.459457631 | 0.459457631 | -5.35397701  |
| 1438877_at   | 0.056987838  | 5.593360416 | 0.77129337   | 0.459473438 | 0.459473438 | -5.353996495 |
| 1444827_at   | -0.073190818 | 6.809090989 | -0.771216127 | 0.459517061 | 0.459517061 | -5.354050261 |
| 1433710_at   | -0.054840329 | 8.152751993 | -0.771116256 | 0.459573467 | 0.459573467 | -5.35411977  |
| 1429652_at   | -0.056212448 | 10.35604779 | -0.771108666 | 0.459577753 | 0.459577753 | -5.354125052 |
| 1446159_at   | 0.073759323  | 5.071138587 | 0.771099123  | 0.459583143 | 0.459583143 | -5.354131694 |
| 1451109_a_at | -0.051442472 | 12.6146943  | -0.771075945 | 0.459596235 | 0.459596235 | -5.354147824 |
| 1456630_x_at | -0.054382224 | 7.054208846 | -0.770930319 | 0.459678493 | 0.459678493 | -5.35424916  |
| 1447449_at   | -0.06130605  | 5.841484639 | -0.770917878 | 0.459685521 | 0.459685521 | -5.354257816 |
| 1441609_at   | -0.054259039 | 3.507929016 | -0.770863905 | 0.459716011 | 0.459716011 | -5.354295369 |
| 1457602_at   | -0.049531408 | 3.905612672 | -0.770841827 | 0.459728483 | 0.459728483 | -5.35431073  |
| 1431572_at   | 0.077870021  | 3.961382961 | 0.770813883  | 0.459744269 | 0.459744269 | -5.354330171 |
| 1458196_at   | 0.059391936  | 3.138629139 | 0.770782749  | 0.459761859 | 0.459761859 | -5.354351831 |
| 1426901_s_at | -0.056681739 | 8.130083428 | -0.770725714 | 0.459794082 | 0.459794082 | -5.354391508 |
| 1431255_at   | 0.10059375   | 3.856262619 | 0.770725562  | 0.459794168 | 0.459794168 | -5.354391614 |
| 1433775_at   | 0.052256711  | 8.634728932 | 0.770622228  | 0.459852552 | 0.459852552 | -5.354463494 |
| 1436886_x_at | -0.073418803 | 7.192408165 | -0.770554453 | 0.459890849 | 0.459890849 | -5.354510634 |
| 1440532_a_at | -0.092133816 | 3.852142738 | -0.770524684 | 0.45990767  | 0.45990767  | -5.354531338 |
| 1448746_at   | -0.048500626 | 8.511156443 | -0.770408326 | 0.459973424 | 0.459973424 | -5.354612258 |
| 1437831_at   | 0.065878539  | 3.479761421 | 0.770359826  | 0.460000833 | 0.460000833 | -5.354645984 |
| 1451064_a_at | 0.052226797  | 10.17855474 | 0.770311433  | 0.460028183 | 0.460028183 | -5.354679634 |
| 1454759_at   | -0.097073466 | 6.993246853 | -0.770243534 | 0.460066559 | 0.460066559 | -5.354726844 |
| 1460492_at   | 0.068433994  | 3.503859455 | 0.770236034  | 0.460070798 | 0.460070798 | -5.354732058 |
| 1440602_at   | 0.055787201  | 3.412069071 | 0.770225792  | 0.460076587 | 0.460076587 | -5.354739179 |
| 1458530_at   | -0.056044137 | 4.163992601 | -0.770216601 | 0.460081782 | 0.460081782 | -5.354745569 |
| 1415791_at   | 0.059317196  | 8.871214838 | 0.770197644  | 0.460092496 | 0.460092496 | -5.354758749 |
| 1424777_at   | 0.069039531  | 8.198103541 | 0.770164983  | 0.460110957 | 0.460110957 | -5.354781455 |
| 1422666_at   | -0.084911356 | 5.144878041 | -0.770039161 | 0.460182081 | 0.460182081 | -5.354868922 |
| 1424646_at   | -0.051264063 | 7.658959889 | -0.769979275 | 0.460215935 | 0.460215935 | -5.354910548 |
| 1423044_at   | 0.056240329  | 9.036399452 | 0.769935957  | 0.460240423 | 0.460240423 | -5.354940655 |
| 1444643_at   | -0.076859198 | 4.959020953 | -0.769907824 | 0.460256329 | 0.460256329 | -5.354960209 |
| 1427053_at   | -0.180315042 | 6.709791635 | -0.769896629 | 0.460262658 | 0.460262658 | -5.354967989 |
| 1417144_at   | 0.064056331  | 8.336579311 | 0.769848888  | 0.460289649 | 0.460289649 | -5.355001168 |
| 1427470_s_at | 0.082670914  | 5.44476754  | 0.769827778  | 0.460301585 | 0.460301585 | -5.355015838 |
| 1431241_at   | -0.069851634 | 7.351708889 | -0.769811019 | 0.46031106  | 0.46031106  | -5.355027485 |
| 1454777_at   | -0.065025589 | 7.631729084 | -0.769769902 | 0.460334308 | 0.460334308 | -5.355056058 |
| 1443308_at   | 0.073390405  | 3.675103768 | 0.769730952  | 0.460356331 | 0.460356331 | -5.355083123 |
| 1433801_at   | 0.067891851  | 6.76201438  | 0.769718212  | 0.460363535 | 0.460363535 | -5.355091976 |
| 1460039_at   | -0.101145929 | 3.998627291 | -0.769665883 | 0.460393124 | 0.460393124 | -5.355128336 |
| 1419595_a_at | -0.080915016 | 8.554096549 | -0.769627397 | 0.460414888 | 0.460414888 | -5.355155077 |
| 1432096_at   | 0.050101183  | 5.588148647 | 0.769601151  | 0.460429729 | 0.460429729 | -5.355173312 |
| 1455055_at   | -0.058693038 | 7.86341394  | -0.769466444 | 0.460505909 | 0.460505909 | -5.355266894 |
| 1453448_at   | 0.066803731  | 9.441936675 | 0.769450414  | 0.460514975 | 0.460514975 | -5.35527803  |
| 1439404_x_at | -0.060380159 | 6.143356531 | -0.769450407 | 0.460514979 | 0.460514979 | -5.355278034 |
| 1423091_a_at | 0.087656891  | 8.070511947 | 0.769445535  | 0.460517735 | 0.460517735 | -5.355281419 |
| 1430917_at   | 0.073241447  | 3.993831738 | 0.769437003  | 0.46052256  | 0.46052256  | -5.355287345 |
| 1426249_at   | -0.059215974 | 8.175682025 | -0.769434571 | 0.460523935 | 0.460523935 | -5.355289035 |
| 1452585_at   | -0.064380349 | 8.899687344 | -0.769406525 | 0.460539798 | 0.460539798 | -5.355308516 |
| 1438864_at   | -0.063334026 | 7.76512904  | -0.76940077  | 0.460543052 | 0.460543052 | -5.355312514 |

|              |              |             |              |             |             |              |
|--------------|--------------|-------------|--------------|-------------|-------------|--------------|
| 1432986_at   | 0.06147508   | 4.617200324 | 0.769383806  | 0.460552647 | 0.460552647 | -5.355324297 |
| 1446829_at   | 0.062177787  | 4.574239233 | 0.769374439  | 0.460557945 | 0.460557945 | -5.355330804 |
| 1452991_at   | -0.072949268 | 7.691727962 | -0.769366667 | 0.460562339 | 0.460562339 | -5.3553362   |
| 1431830_at   | -0.060024125 | 8.24818363  | -0.769366566 | 0.460562398 | 0.460562398 | -5.355336272 |
| 1424662_at   | 0.050723806  | 9.594938004 | 0.769350215  | 0.460571646 | 0.460571646 | -5.355347629 |
| 1444814_at   | -0.076861553 | 5.506870588 | -0.769345796 | 0.460574146 | 0.460574146 | -5.355350698 |
| 1445071_at   | -0.063529318 | 3.923475871 | -0.769308807 | 0.460595067 | 0.460595067 | -5.355376389 |
| 1450506_a_at | 0.074723704  | 6.724398651 | 0.769303731  | 0.460597938 | 0.460597938 | -5.355379914 |
| 1437551_at   | -0.047362331 | 5.442614074 | -0.769290227 | 0.460605577 | 0.460605577 | -5.355389294 |
| 1418712_at   | 0.066863362  | 8.558913991 | 0.769274847  | 0.460614276 | 0.460614276 | -5.355399975 |
| 1438467_at   | -0.081781428 | 4.00951663  | -0.769250455 | 0.460628074 | 0.460628074 | -5.355416916 |
| 1438832_x_at | 0.062598445  | 8.787809042 | 0.7692361    | 0.460636193 | 0.460636193 | -5.355426885 |
| 1429727_at   | -0.056885335 | 6.537534155 | -0.769210269 | 0.460650805 | 0.460650805 | -5.355444823 |
| 1452159_at   | 0.056247833  | 8.035775554 | 0.769197864  | 0.460657822 | 0.460657822 | -5.355453438 |
| 1424049_at   | -0.052414063 | 9.208976366 | -0.76919778  | 0.46065787  | 0.46065787  | -5.355453496 |
| 1460690_at   | -0.057029565 | 9.153682117 | -0.769196075 | 0.460658834 | 0.460658834 | -5.355454681 |
| 1430333_at   | -0.052588226 | 3.474339218 | -0.769124728 | 0.460699195 | 0.460699195 | -5.355504226 |
| 1425334_at   | -0.086127113 | 5.16635857  | -0.769105403 | 0.460710127 | 0.460710127 | -5.355517644 |
| 1458671_at   | -0.056033869 | 3.854818132 | -0.769076941 | 0.460726229 | 0.460726229 | -5.355537408 |
| 1435179_at   | 0.064911022  | 3.434413327 | 0.768982942  | 0.460779409 | 0.460779409 | -5.355602673 |
| 1451181_at   | -0.108640982 | 6.78118435  | -0.768968981 | 0.460787308 | 0.460787308 | -5.355612366 |
| 1430996_at   | 0.09140325   | 6.805640904 | 0.768959063  | 0.460792919 | 0.460792919 | -5.355619252 |
| 1428023_at   | 0.055352336  | 7.489671599 | 0.768947903  | 0.460799234 | 0.460799234 | -5.355627    |
| 1445209_at   | 0.06547373   | 4.279460891 | 0.768881792  | 0.460836639 | 0.460836639 | -5.355672896 |
| 1456466_x_at | 0.072136435  | 8.192178304 | 0.768878313  | 0.460838608 | 0.460838608 | -5.355675311 |
| 1459007_at   | -0.064643037 | 4.465293797 | -0.768844982 | 0.460857467 | 0.460857467 | -5.355698449 |
| 1427760_s_at | -0.076154479 | 3.767377772 | -0.76883471  | 0.46086328  | 0.46086328  | -5.355705579 |
| 1442511_at   | -0.060510317 | 6.649966519 | -0.768822009 | 0.460870467 | 0.460870467 | -5.355714396 |
| 1449592_at   | 0.060819498  | 5.939594983 | 0.7688188    | 0.460872283 | 0.460872283 | -5.355716624 |
| 1432989_at   | -0.071889371 | 3.981724999 | -0.768777656 | 0.460895564 | 0.460895564 | -5.355745184 |
| 1446087_at   | -0.076295898 | 4.834651387 | -0.768747687 | 0.460912523 | 0.460912523 | -5.355765985 |
| 1428538_s_at | -0.085454016 | 5.9000176   | -0.768683888 | 0.460948626 | 0.460948626 | -5.355810266 |
| 1448085_at   | -0.071350068 | 3.929083803 | -0.768647497 | 0.460969221 | 0.460969221 | -5.355835523 |
| 1452411_at   | 0.061057641  | 7.30500759  | 0.768623634  | 0.460982725 | 0.460982725 | -5.355852084 |
| 1437518_at   | -0.065046951 | 3.179142443 | -0.768620618 | 0.460984432 | 0.460984432 | -5.355854177 |
| 1417227_at   | 0.063471826  | 9.273016867 | 0.768602443  | 0.460994719 | 0.460994719 | -5.355866791 |
| 1444296_a_at | 0.0715612    | 3.426793528 | 0.768567131  | 0.461014703 | 0.461014703 | -5.355891296 |
| 1441156_at   | 0.08865909   | 4.603970235 | 0.768563161  | 0.46101695  | 0.46101695  | -5.355894051 |
| 1452626_a_at | -0.073904438 | 7.662909552 | -0.768558457 | 0.461019612 | 0.461019612 | -5.355897315 |
| 1422465_a_at | -0.068574545 | 9.675103205 | -0.768552224 | 0.46102314  | 0.46102314  | -5.355901641 |
| 1447186_at   | -0.079494731 | 4.059611669 | -0.768539926 | 0.4610301   | 0.4610301   | -5.355910175 |
| 1447051_at   | -0.05807323  | 3.604536759 | -0.768538063 | 0.461031155 | 0.461031155 | -5.355911468 |
| 1454544_at   | 0.052052958  | 3.76357935  | 0.768509458  | 0.461047345 | 0.461047345 | -5.355931317 |
| 1460425_at   | -0.068585439 | 3.934440562 | -0.768413079 | 0.461101896 | 0.461101896 | -5.355998192 |
| 1417769_at   | 0.117371284  | 5.948176312 | 0.768413032  | 0.461101923 | 0.461101923 | -5.355998225 |
| 1417697_at   | 0.059399734  | 6.523992572 | 0.768348152  | 0.461138648 | 0.461138648 | -5.35604324  |
| 1424420_at   | -0.077387981 | 7.733900035 | -0.768329465 | 0.461149226 | 0.461149226 | -5.356056204 |
| 1444027_at   | -0.056277188 | 3.722781519 | -0.76830432  | 0.46116346  | 0.46116346  | -5.356073649 |
| 1449542_at   | -0.057666435 | 7.045560265 | -0.768301309 | 0.461165165 | 0.461165165 | -5.356075738 |
| 1445322_x_at | 0.05614776   | 8.620229252 | 0.768263326  | 0.461186666 | 0.461186666 | -5.356102088 |
| 1456930_at   | 0.069926414  | 6.641971754 | 0.768206317  | 0.46121894  | 0.46121894  | -5.356141635 |
| 1432916_at   | 0.097426699  | 4.331891198 | 0.768174727  | 0.461236824 | 0.461236824 | -5.356163548 |
| 1420550_at   | 0.075773392  | 3.681934922 | 0.768091069  | 0.461284188 | 0.461284188 | -5.356221575 |

|              |              |             |              |             |             |              |
|--------------|--------------|-------------|--------------|-------------|-------------|--------------|
| 1458928_at   | 0.046273085  | 3.464724092 | 0.768087235  | 0.461286358 | 0.461286358 | -5.356224234 |
| 1428196_a_at | 0.068030447  | 7.79167376  | 0.767974593  | 0.461350137 | 0.461350137 | -5.356302355 |
| 1436869_at   | -0.092513415 | 8.887828879 | -0.767949854 | 0.461364145 | 0.461364145 | -5.356319512 |
| 1439368_a_at | -0.08244007  | 6.436066545 | -0.767894957 | 0.461395231 | 0.461395231 | -5.35635758  |
| 1419918_at   | -0.141702055 | 6.393513826 | -0.767858458 | 0.461415899 | 0.461415899 | -5.356382889 |
| 1450937_at   | 0.060953029  | 9.260894859 | 0.7678581    | 0.461416102 | 0.461416102 | -5.356383138 |
| 1448462_at   | 0.059212497  | 9.254991786 | 0.767817535  | 0.461439073 | 0.461439073 | -5.356411265 |
| 1420015_s_at | -0.077603763 | 6.422526924 | -0.767802819 | 0.461447407 | 0.461447407 | -5.356421469 |
| 1416945_at   | -0.089861897 | 8.402951229 | -0.767792917 | 0.461453015 | 0.461453015 | -5.356428334 |
| 1427674_a_at | -0.078942467 | 6.004981008 | -0.767750267 | 0.461477169 | 0.461477169 | -5.356457905 |
| 1447091_at   | -0.084363026 | 4.586636738 | -0.767695515 | 0.461508177 | 0.461508177 | -5.356495864 |
| 1422792_at   | 0.050067441  | 10.06353333 | 0.767623957  | 0.461548706 | 0.461548706 | -5.356545472 |
| 1429441_at   | 0.051137339  | 7.520777487 | 0.767562977  | 0.461583245 | 0.461583245 | -5.356587743 |
| 1446507_at   | -0.069026619 | 6.097891764 | -0.767518974 | 0.461608169 | 0.461608169 | -5.356618243 |
| 1444711_at   | -0.07052353  | 5.728404596 | -0.767471929 | 0.461634818 | 0.461634818 | -5.356650852 |
| 1442911_at   | 0.060204093  | 5.999044566 | 0.767465136  | 0.461638666 | 0.461638666 | -5.35665556  |
| 1457953_at   | -0.080854345 | 4.786805477 | -0.767406447 | 0.461671912 | 0.461671912 | -5.356696236 |
| 1432802_at   | 0.070677899  | 4.033231836 | 0.767396011  | 0.461677823 | 0.461677823 | -5.356703468 |
| 1439184_s_at | 0.099079428  | 10.1677253  | 0.76738986   | 0.461681308 | 0.461681308 | -5.356707731 |
| 1454778_x_at | 0.049343988  | 13.78707916 | 0.767311941  | 0.46172545  | 0.46172545  | -5.35676173  |
| 1429584_at   | -0.062641264 | 7.114092364 | -0.767296149 | 0.461734397 | 0.461734397 | -5.356772673 |
| 1439696_at   | 0.115321566  | 6.633045015 | 0.767289466  | 0.461738183 | 0.461738183 | -5.356777304 |
| 1440936_at   | 0.115925775  | 6.932157518 | 0.767286839  | 0.461739671 | 0.461739671 | -5.356779124 |
| 1437388_at   | -0.151193538 | 5.13435834  | -0.767263974 | 0.461752625 | 0.461752625 | -5.356794969 |
| 1424081_at   | 0.053707737  | 8.810689261 | 0.767238789  | 0.461766894 | 0.461766894 | -5.35681242  |
| 1460475_at   | -0.069072527 | 4.04846268  | -0.767211738 | 0.46178222  | 0.46178222  | -5.356831164 |
| 1448336_at   | 0.050240223  | 9.495138795 | 0.767205558  | 0.461785722 | 0.461785722 | -5.356835446 |
| 1423196_at   | 0.054582416  | 7.180024607 | 0.767163213  | 0.461809714 | 0.461809714 | -5.356864786 |
| 1441908_x_at | -0.068535    | 4.272040926 | -0.767154152 | 0.461814848 | 0.461814848 | -5.356871064 |
| 1448517_at   | 0.051955317  | 9.365121825 | 0.767148261  | 0.461818186 | 0.461818186 | -5.356875145 |
| 1419677_at   | -0.076610598 | 4.269921103 | -0.767112078 | 0.461838687 | 0.461838687 | -5.356900214 |
| 1436772_at   | 0.057576802  | 3.619979321 | 0.767068161  | 0.461863572 | 0.461863572 | -5.35693064  |
| 1421004_at   | 0.071118254  | 6.482667319 | 0.767066464  | 0.461864534 | 0.461864534 | -5.356931815 |
| 1428760_at   | 0.073947094  | 8.861392409 | 0.767057319  | 0.461869716 | 0.461869716 | -5.356938151 |
| 1424313_a_at | 0.063672906  | 10.47260238 | 0.767025077  | 0.461887986 | 0.461887986 | -5.356960488 |
| 1441233_at   | 0.065364873  | 7.351175248 | 0.766976619  | 0.461915445 | 0.461915445 | -5.356994055 |
| 1452619_a_at | 0.05440013   | 4.546406228 | 0.766801975  | 0.46201442  | 0.46201442  | -5.357115022 |
| 1452064_at   | 0.048889859  | 8.92100699  | 0.766793664  | 0.462019131 | 0.462019131 | -5.357120778 |
| 1427878_at   | 0.065209417  | 7.359262064 | 0.766770922  | 0.46203202  | 0.46203202  | -5.357136528 |
| 1452853_at   | -0.055359321 | 3.65347569  | -0.766748332 | 0.462044824 | 0.462044824 | -5.357152173 |
| 1420042_at   | -0.065503232 | 3.234479526 | -0.766621006 | 0.462116994 | 0.462116994 | -5.357240344 |
| 1455479_a_at | -0.048381759 | 11.7015854  | -0.766419525 | 0.462231211 | 0.462231211 | -5.357379841 |
| 1446411_at   | -0.075968931 | 6.692644877 | -0.766323561 | 0.462285619 | 0.462285619 | -5.357446271 |
| 1431420_s_at | -0.063014377 | 11.16389991 | -0.766302711 | 0.46229744  | 0.46229744  | -5.357460703 |
| 1438761_a_at | 0.06280512   | 10.97710931 | 0.76623721   | 0.46233458  | 0.46233458  | -5.357506041 |
| 1420270_at   | -0.088621323 | 5.54758765  | -0.766217084 | 0.462345991 | 0.462345991 | -5.35751997  |
| 1426217_at   | 0.058575807  | 8.001055641 | 0.766200443  | 0.462355427 | 0.462355427 | -5.357531488 |
| 1427344_s_at | 0.059791317  | 4.487840139 | 0.766194282  | 0.462358921 | 0.462358921 | -5.357535752 |
| 1425566_at   | -0.067283124 | 5.057085893 | -0.766165241 | 0.462375388 | 0.462375388 | -5.357555851 |
| 1429347_at   | -0.067526871 | 4.107065183 | -0.766142989 | 0.462388006 | 0.462388006 | -5.357571251 |
| 1435914_at   | 0.068788463  | 7.901806453 | 0.766136694  | 0.462391576 | 0.462391576 | -5.357575607 |
| 1428579_at   | 0.057392821  | 10.16722252 | 0.766111347  | 0.462405949 | 0.462405949 | -5.357593148 |
| 1445588_at   | -0.062382385 | 6.358151193 | -0.766050153 | 0.462440651 | 0.462440651 | -5.357635495 |



|              |              |             |              |             |             |              |
|--------------|--------------|-------------|--------------|-------------|-------------|--------------|
| 1436644_x_at | 0.097416005  | 4.430088888 | 0.765983771  | 0.462478298 | 0.462478298 | -5.357681429 |
| 1435390_at   | 0.054502116  | 7.737033293 | 0.76595864   | 0.462492551 | 0.462492551 | -5.357698818 |
| 1431218_at   | 0.083190187  | 6.210699526 | 0.765924806  | 0.462511739 | 0.462511739 | -5.357722228 |
| 1429409_at   | -0.061088001 | 3.454451532 | -0.765918968 | 0.462515051 | 0.462515051 | -5.357726267 |
| 1433208_at   | 0.089874275  | 4.068746528 | 0.765888652  | 0.462532245 | 0.462532245 | -5.357747242 |
| 1439868_at   | 0.1347376    | 6.898195817 | 0.765851918  | 0.46255308  | 0.46255308  | -5.357772656 |
| 1428961_a_at | 0.069182655  | 8.89388875  | 0.765791241  | 0.462587496 | 0.462587496 | -5.357814633 |
| 1430877_at   | 0.073288577  | 6.713208795 | 0.765777809  | 0.462595115 | 0.462595115 | -5.357823926 |
| 1434964_at   | 0.048946436  | 8.011398329 | 0.765774939  | 0.462596743 | 0.462596743 | -5.357825911 |
| 1449565_at   | -0.051334638 | 3.888354958 | -0.76576428  | 0.462602789 | 0.462602789 | -5.357833285 |
| 1430751_at   | -0.062046481 | 3.885134186 | -0.765729999 | 0.462622235 | 0.462622235 | -5.357856998 |
| 1421652_at   | -0.096910891 | 4.03286748  | -0.765716092 | 0.462630123 | 0.462630123 | -5.357866618 |
| 1446872_at   | -0.059713141 | 3.228403964 | -0.765632453 | 0.462677569 | 0.462677569 | -5.357924471 |
| 1441780_at   | -0.059663693 | 3.483446151 | -0.765569729 | 0.462713153 | 0.462713153 | -5.357967853 |
| 1445124_at   | 0.060594989  | 3.76929231  | 0.765554507  | 0.462721789 | 0.462721789 | -5.35797838  |
| 1420433_at   | 0.050596411  | 3.77559866  | 0.765544355  | 0.462727548 | 0.462727548 | -5.357985402 |
| 1426580_at   | -0.070392186 | 9.139260897 | -0.765514466 | 0.462744505 | 0.462744505 | -5.358006072 |
| 1436306_at   | -0.094894645 | 8.031164797 | -0.765499462 | 0.462753018 | 0.462753018 | -5.358016448 |
| 1438292_x_at | -0.06585987  | 10.74374669 | -0.765441827 | 0.462785718 | 0.462785718 | -5.358056305 |
| 1436091_at   | 0.05358951   | 6.718394602 | 0.765296167  | 0.462868367 | 0.462868367 | -5.358157023 |
| 1449034_at   | -0.075559067 | 3.82293991  | -0.765281961 | 0.462876428 | 0.462876428 | -5.358166845 |
| 1430894_at   | -0.079902579 | 5.165702568 | -0.76527693  | 0.462879283 | 0.462879283 | -5.358170323 |
| 1418165_at   | -0.093825347 | 4.114676035 | -0.765204815 | 0.462920205 | 0.462920205 | -5.35822018  |
| 1418986_a_at | 0.059438984  | 7.147414102 | 0.765171731  | 0.46293898  | 0.46293898  | -5.358243051 |
| 1416738_at   | -0.049348205 | 8.352391258 | -0.765141589 | 0.462956086 | 0.462956086 | -5.358263888 |
| 1423060_at   | 0.075089288  | 10.13973401 | 0.765041103  | 0.463013115 | 0.463013115 | -5.358333347 |
| 1433466_at   | 0.123770035  | 4.577274417 | 0.764976477  | 0.463049795 | 0.463049795 | -5.358378015 |
| 1455190_at   | 0.058704562  | 6.260207909 | 0.764959357  | 0.463059513 | 0.463059513 | -5.358389848 |
| 1422162_at   | -0.059782662 | 6.042587039 | -0.764933155 | 0.463074385 | 0.463074385 | -5.358407957 |
| 1427048_at   | -0.090304624 | 10.21496938 | -0.764920926 | 0.463081326 | 0.463081326 | -5.358416408 |
| 1452702_at   | 0.058784648  | 7.524558649 | 0.764911694  | 0.463086566 | 0.463086566 | -5.358422788 |
| 1426410_at   | -0.059689296 | 9.055826745 | -0.76486911  | 0.463110738 | 0.463110738 | -5.358452217 |
| 1434648_a_at | 0.074758277  | 9.436672415 | 0.764854353  | 0.463119115 | 0.463119115 | -5.358462416 |
| 1441019_at   | -0.060173228 | 5.258758711 | -0.764816479 | 0.463140614 | 0.463140614 | -5.358488588 |
| 1460569_x_at | -0.125867634 | 7.423228985 | -0.764810318 | 0.463144111 | 0.463144111 | -5.358492845 |
| 1442486_at   | -0.06902645  | 3.58781984  | -0.764782363 | 0.46315998  | 0.46315998  | -5.358512162 |
| 1418222_at   | 0.076395759  | 7.901496474 | 0.764754377  | 0.463175868 | 0.463175868 | -5.3585315   |
| 1430876_at   | 0.059629274  | 3.443716731 | 0.7646486    | 0.463235919 | 0.463235919 | -5.358604585 |
| 1451080_at   | 0.051725509  | 10.86384558 | 0.764583922  | 0.463272639 | 0.463272639 | -5.358649268 |
| 1435414_s_at | 0.062239894  | 10.18832397 | 0.764518642  | 0.463309704 | 0.463309704 | -5.358694365 |
| 1421215_a_at | -0.048577717 | 4.767735115 | -0.764446099 | 0.463350895 | 0.463350895 | -5.358744474 |
| 1430227_at   | -0.079279513 | 4.979833787 | -0.76444413  | 0.463352013 | 0.463352013 | -5.358745835 |
| 1437349_at   | 0.050496784  | 9.623179033 | 0.764436907  | 0.463356114 | 0.463356114 | -5.358750824 |
| 1423633_at   | 0.052092486  | 8.257448525 | 0.764412389  | 0.463370037 | 0.463370037 | -5.358767759 |
| 1441947_x_at | -0.103804758 | 7.223064046 | -0.764294359 | 0.463437062 | 0.463437062 | -5.358849277 |
| 1460395_at   | 0.07931014   | 9.162598689 | 0.764273501  | 0.463448907 | 0.463448907 | -5.358863682 |
| 1450599_at   | -0.06400999  | 3.377615933 | -0.764076093 | 0.463561025 | 0.463561025 | -5.358999996 |
| 1419507_at   | -0.051556226 | 3.757241045 | -0.764071999 | 0.46356335  | 0.46356335  | -5.359002823 |
| 1446928_at   | -0.056220525 | 8.517640005 | -0.76401892  | 0.4635935   | 0.4635935   | -5.359039469 |
| 1459059_at   | 0.057148394  | 3.973987846 | 0.764008998  | 0.463599135 | 0.463599135 | -5.359046319 |
| 1441359_at   | -0.056749856 | 7.469080612 | -0.763900392 | 0.463660829 | 0.463660829 | -5.359121295 |
| 1415800_at   | 0.09401479   | 11.05783793 | 0.763831284  | 0.463700088 | 0.463700088 | -5.359168998 |
| 1438894_at   | 0.097840809  | 4.492713524 | 0.763713448  | 0.463767035 | 0.463767035 | -5.35925033  |

|                    |              |             |              |             |             |              |
|--------------------|--------------|-------------|--------------|-------------|-------------|--------------|
| 1435848_at         | -0.075213249 | 4.867742089 | -0.763625004 | 0.463817287 | 0.463817287 | -5.359311367 |
| 1457947_at         | -0.066947914 | 5.050706716 | -0.763607345 | 0.463827321 | 0.463827321 | -5.359323553 |
| 1422810_at         | 0.108413809  | 7.371536221 | 0.763579043  | 0.463843402 | 0.463843402 | -5.359343083 |
| 1445391_at         | 0.057366859  | 5.464013603 | 0.76357175   | 0.463847547 | 0.463847547 | -5.359348116 |
| 1416176_at         | 0.053232797  | 11.47469538 | 0.76356883   | 0.463849206 | 0.463849206 | -5.359350131 |
| 1419922_s_at       | 0.06254028   | 9.773786765 | 0.763519263  | 0.463877371 | 0.463877371 | -5.359384333 |
| 1435534_a_at       | 0.107256443  | 10.10003331 | 0.763473131  | 0.463903586 | 0.463903586 | -5.359416163 |
| 1433976_at         | 0.058849749  | 8.991341771 | 0.763469353  | 0.463905733 | 0.463905733 | -5.35941877  |
| 1435661_at         | -0.08489048  | 8.617095378 | -0.763442229 | 0.463921147 | 0.463921147 | -5.359437484 |
| 1442234_at         | 0.076458445  | 4.002203537 | 0.763439568  | 0.463922659 | 0.463922659 | -5.359439321 |
| 1435004_at         | 0.055095817  | 9.162655282 | 0.763436895  | 0.463924178 | 0.463924178 | -5.359441164 |
| 1448030_at         | -0.051347746 | 5.719234209 | -0.763388953 | 0.463951423 | 0.463951423 | -5.359474241 |
| 1423329_at         | -0.101629917 | 4.163670465 | -0.76338187  | 0.463955449 | 0.463955449 | -5.359479128 |
| 1421467_at         | -0.071955928 | 5.643801557 | -0.763314713 | 0.463993616 | 0.463993616 | -5.359525457 |
| 1430650_at         | -0.10610432  | 6.178088354 | -0.763304086 | 0.463999655 | 0.463999655 | -5.359532788 |
| 1441834_x_at       | -0.056340212 | 3.272480274 | -0.763062688 | 0.464136865 | 0.464136865 | -5.35969929  |
| 1420794_at         | 0.063494251  | 3.441739249 | 0.762944733  | 0.46420392  | 0.46420392  | -5.359780632 |
| 1441432_at         | 0.092214266  | 3.373130377 | 0.762920282  | 0.464217821 | 0.464217821 | -5.359797492 |
| 1448711_at         | 0.057854338  | 8.196300471 | 0.762856581  | 0.464254037 | 0.464254037 | -5.359841415 |
| 1454891_at         | 0.04738186   | 7.03734363  | 0.762747356  | 0.464316139 | 0.464316139 | -5.359916719 |
| 1454310_at         | -0.055193478 | 4.768874053 | -0.762718349 | 0.464332632 | 0.464332632 | -5.359936716 |
| 1427958_at         | 0.061072815  | 6.958376883 | 0.76267935   | 0.464354808 | 0.464354808 | -5.359963601 |
| 1416843_at         | 0.052134954  | 8.786929774 | 0.762620957  | 0.464388013 | 0.464388013 | -5.360003852 |
| 1457824_at         | 0.069835172  | 3.856530832 | 0.762545726  | 0.464430794 | 0.464430794 | -5.360055707 |
| 1443423_at         | -0.064283965 | 6.966375216 | -0.762459564 | 0.464479795 | 0.464479795 | -5.36011509  |
| 1446127_at         | -0.06687081  | 7.259637339 | -0.762448216 | 0.464486248 | 0.464486248 | -5.360122911 |
| 1459358_at         | 0.051175903  | 5.119364427 | 0.762439805  | 0.464491032 | 0.464491032 | -5.360128707 |
| 1423312_at         | -0.081067773 | 4.979151434 | -0.762417575 | 0.464503675 | 0.464503675 | -5.360144027 |
| 1454919_at         | 0.072884422  | 8.158195547 | 0.762412067  | 0.464506808 | 0.464506808 | -5.360147823 |
| 1422075_at         | 0.085420857  | 5.230576467 | 0.762407538  | 0.464509384 | 0.464509384 | -5.360150944 |
| 1454592_at         | -0.072988035 | 6.112619984 | -0.762380369 | 0.464524836 | 0.464524836 | -5.360169667 |
| 1458270_at         | 0.048616007  | 4.034025284 | 0.762321971  | 0.464558051 | 0.464558051 | -5.360209908 |
| 1431209_s_at       | 0.057652633  | 5.031221206 | 0.762318947  | 0.464559771 | 0.464559771 | -5.360211992 |
| 1419094_at         | 0.077528063  | 3.532056169 | 0.762289649  | 0.464576436 | 0.464576436 | -5.36023218  |
| 1415936_at         | -0.056710018 | 7.500447324 | -0.762269427 | 0.464587938 | 0.464587938 | -5.360246114 |
| 1449110_at         | 0.077489438  | 10.01482316 | 0.762264423  | 0.464590785 | 0.464590785 | -5.360249562 |
| 1429892_at         | 0.051761851  | 4.201276729 | 0.762212448  | 0.464620349 | 0.464620349 | -5.360285372 |
| 1418509_at         | -0.192023425 | 10.41027434 | -0.762193068 | 0.464631374 | 0.464631374 | -5.360298725 |
| AFFX-r2-P1-cre-3_a | 0.059886058  | 13.77532813 | 0.762166479  | 0.464646498 | 0.464646498 | -5.360317043 |
| 1424857_a_at       | -0.126942812 | 5.99528006  | -0.762149778 | 0.464655999 | 0.464655999 | -5.360328549 |
| 1424602_s_at       | -0.092254363 | 5.834290981 | -0.762149615 | 0.464656092 | 0.464656092 | -5.360328661 |
| 1437908_a_at       | 0.058630115  | 9.820068863 | 0.762117051  | 0.464674617 | 0.464674617 | -5.360351095 |
| 1415922_s_at       | 0.079985603  | 11.91993315 | 0.762097141  | 0.464685943 | 0.464685943 | -5.360364811 |
| 1459310_at         | 0.073074505  | 3.289719881 | 0.762086477  | 0.46469201  | 0.46469201  | -5.360372158 |
| 1437784_at         | 0.070698048  | 7.840851253 | 0.762086029  | 0.464692265 | 0.464692265 | -5.360372466 |
| 1443120_at         | -0.062897345 | 5.084563512 | -0.762059972 | 0.464707088 | 0.464707088 | -5.360390416 |
| 1422100_at         | -0.046676311 | 3.616493194 | -0.76203237  | 0.464722792 | 0.464722792 | -5.36040943  |
| 1437397_at         | 0.059785968  | 4.697525018 | 0.762007157  | 0.464737136 | 0.464737136 | -5.360426797 |
| 1432494_a_at       | -0.081479148 | 8.97875714  | -0.761999477 | 0.464741505 | 0.464741505 | -5.360432087 |
| 1437997_x_at       | -0.061508083 | 8.27427755  | -0.761862088 | 0.464819675 | 0.464819675 | -5.360526715 |
| 1434137_x_at       | -0.075012141 | 5.706087185 | -0.761563582 | 0.464989543 | 0.464989543 | -5.360732262 |
| 1459248_at         | -0.077299369 | 5.865292826 | -0.761554653 | 0.464994625 | 0.464994625 | -5.36073841  |
| 1415751_at         | 0.050712083  | 10.70113912 | 0.761530352  | 0.465008456 | 0.465008456 | -5.36075514  |

|              |              |             |              |             |             |              |
|--------------|--------------|-------------|--------------|-------------|-------------|--------------|
| 1433284_at   | -0.062435061 | 3.358144203 | -0.761494963 | 0.465028597 | 0.465028597 | -5.360779503 |
| 1417836_at   | -0.056268259 | 9.576864152 | -0.761343976 | 0.465114538 | 0.465114538 | -5.360883436 |
| 1435702_s_at | 0.140816943  | 9.370204996 | 0.761325451  | 0.465125083 | 0.465125083 | -5.360896187 |
| 1427126_at   | 0.05473936   | 7.0468198   | 0.761237252  | 0.465175291 | 0.465175291 | -5.360956889 |
| 1417930_at   | 0.069393115  | 9.081633691 | 0.761181437  | 0.465207066 | 0.465207066 | -5.360995301 |
| 1436830_at   | -0.074140465 | 6.852347048 | -0.761151386 | 0.465224174 | 0.465224174 | -5.361015981 |
| 1421898_a_at | 0.054042355  | 7.30089064  | 0.761112798  | 0.465246143 | 0.465246143 | -5.361042534 |
| 1442990_at   | -0.060062261 | 3.183316483 | -0.761097182 | 0.465255034 | 0.465255034 | -5.36105328  |
| 1445709_at   | -0.101858444 | 5.271191145 | -0.761035267 | 0.465290286 | 0.465290286 | -5.361095882 |
| 1431989_at   | -0.085370511 | 3.716854398 | -0.760993863 | 0.46531386  | 0.46531386  | -5.36112437  |
| 1449250_at   | 0.131192257  | 5.643558035 | 0.760949808  | 0.465338945 | 0.465338945 | -5.36115468  |
| 1423388_at   | 0.04979086   | 7.812503131 | 0.760942707  | 0.465342988 | 0.465342988 | -5.361159565 |
| 1448858_at   | -0.084996994 | 8.013682857 | -0.760819895 | 0.465412922 | 0.465412922 | -5.361244052 |
| 1432927_at   | -0.091813698 | 4.243054457 | -0.760795136 | 0.465427022 | 0.465427022 | -5.361261083 |
| 1435644_at   | -0.074737622 | 9.973752018 | -0.76079196  | 0.465428831 | 0.465428831 | -5.361263268 |
| 1425864_a_at | -0.110641895 | 4.618633662 | -0.760760817 | 0.465446566 | 0.465446566 | -5.36128469  |
| 1437214_at   | 0.188348443  | 4.685375072 | 0.760726303  | 0.465466222 | 0.465466222 | -5.361308429 |
| 1452922_at   | 0.059942793  | 5.9467116   | 0.76068463   | 0.465489955 | 0.465489955 | -5.361337091 |
| 1455308_at   | -0.049435198 | 10.0814576  | -0.760635918 | 0.465517698 | 0.465517698 | -5.361370594 |
| 1422850_at   | 0.067119073  | 10.56247251 | 0.76051569   | 0.465586177 | 0.465586177 | -5.361453274 |
| 1421430_at   | -0.106961021 | 5.990155982 | -0.760481519 | 0.465605641 | 0.465605641 | -5.361476771 |
| 1427225_at   | 0.064377649  | 7.21098881  | 0.760457825  | 0.465619138 | 0.465619138 | -5.361493063 |
| 1442583_a_at | -0.049574692 | 4.262007806 | -0.760422854 | 0.465639059 | 0.465639059 | -5.361517109 |
| 1443201_at   | 0.105634353  | 9.383356705 | 0.76037683   | 0.465665277 | 0.465665277 | -5.361548754 |
| 1448889_at   | -0.062587318 | 8.403965791 | -0.760298731 | 0.465709768 | 0.465709768 | -5.361602447 |
| 1431418_at   | 0.491330374  | 5.974783484 | 0.760276693  | 0.465722323 | 0.465722323 | -5.361617597 |
| 1432830_at   | -0.056400374 | 6.229609167 | -0.760179742 | 0.465777559 | 0.465777559 | -5.361684244 |
| 1454788_at   | 0.045298101  | 8.068879913 | 0.760159644  | 0.465789011 | 0.465789011 | -5.361698059 |
| 1446400_at   | 0.068993013  | 4.568105995 | 0.760097729  | 0.465824288 | 0.465824288 | -5.361740615 |
| 1431515_at   | -0.060698542 | 3.380249729 | -0.760083797 | 0.465832227 | 0.465832227 | -5.361750191 |
| 1423713_at   | -0.054975366 | 7.125269494 | -0.760055084 | 0.465848588 | 0.465848588 | -5.361769926 |
| 1429803_at   | -0.055889858 | 4.057472732 | -0.760052728 | 0.46584993  | 0.46584993  | -5.361771544 |
| 1459923_at   | -0.052150563 | 3.218014854 | -0.760044146 | 0.46585482  | 0.46585482  | -5.361777443 |
| 1441843_s_at | 0.085311609  | 8.435862694 | 0.760022478  | 0.465867167 | 0.465867167 | -5.361792335 |
| 1417967_at   | -0.064011574 | 8.354750436 | -0.759921954 | 0.465924451 | 0.465924451 | -5.361861417 |
| 1445636_at   | 0.067922587  | 4.113491223 | 0.759887894  | 0.46594386  | 0.46594386  | -5.361884822 |
| 1426812_a_at | -0.05451035  | 9.037056614 | -0.759758413 | 0.466017654 | 0.466017654 | -5.361973789 |
| 1445310_at   | -0.09196013  | 4.498293823 | -0.759756813 | 0.466018566 | 0.466018566 | -5.361974888 |
| 1434337_at   | -0.053573294 | 9.146969616 | -0.759751014 | 0.46602187  | 0.46602187  | -5.361978872 |
| 1447253_x_at | -0.080726125 | 6.511475045 | -0.759741177 | 0.466027477 | 0.466027477 | -5.361985631 |
| 1432164_a_at | 0.047595416  | 10.55178405 | 0.759687134  | 0.46605828  | 0.46605828  | -5.362022759 |
| 1442603_at   | 0.070992999  | 6.747510889 | 0.759682714  | 0.466060799 | 0.466060799 | -5.362025796 |
| 1443136_at   | -0.111775802 | 3.926520341 | -0.759655404 | 0.466076365 | 0.466076365 | -5.362044557 |
| 1459919_a_at | -0.072067735 | 4.640707946 | -0.759587903 | 0.466114842 | 0.466114842 | -5.362090927 |
| 1421345_at   | 0.067453258  | 3.290924273 | 0.7594945    | 0.466168085 | 0.466168085 | -5.362155083 |
| 1419921_s_at | -0.063127486 | 6.461145052 | -0.759484697 | 0.466173673 | 0.466173673 | -5.362161816 |
| 1417739_at   | 0.054700755  | 7.726102818 | 0.759319357  | 0.466267935 | 0.466267935 | -5.362275368 |
| 1447665_at   | -0.066803098 | 3.180682121 | -0.759258644 | 0.466302551 | 0.466302551 | -5.362317058 |
| 1460245_at   | 0.070437554  | 3.283248206 | 0.759246163  | 0.466309667 | 0.466309667 | -5.362325628 |
| 1455120_at   | -0.062646152 | 3.874383737 | -0.759225384 | 0.466321515 | 0.466321515 | -5.362339896 |
| 1442954_at   | -0.072941274 | 4.215475428 | -0.759175476 | 0.466349972 | 0.466349972 | -5.362374163 |
| 1440167_s_at | -0.067530994 | 9.85384087  | -0.75913328  | 0.466374033 | 0.466374033 | -5.362403134 |
| 1427263_at   | -0.850796839 | 6.25306385  | -0.759124986 | 0.466378763 | 0.466378763 | -5.362408829 |

|              |              |             |              |             |             |              |
|--------------|--------------|-------------|--------------|-------------|-------------|--------------|
| 1444861_at   | 0.060227594  | 3.875482501 | 0.759111216  | 0.466386614 | 0.466386614 | -5.362418282 |
| 1438427_at   | 0.05890017   | 5.979942979 | 0.759105524  | 0.46638986  | 0.46638986  | -5.36242219  |
| 1432144_a_at | 0.057357724  | 9.452223857 | 0.75905935   | 0.466416191 | 0.466416191 | -5.36245389  |
| 1422543_at   | -0.081933663 | 4.900626304 | -0.759013184 | 0.466442518 | 0.466442518 | -5.362485582 |
| 1459280_at   | 0.062854815  | 4.592582918 | 0.758921493  | 0.46649481  | 0.46649481  | -5.362548522 |
| 1441642_at   | -0.06158751  | 5.071185111 | -0.758871633 | 0.466523246 | 0.466523246 | -5.362582744 |
| 1424169_at   | 0.054524206  | 9.328299914 | 0.758837205  | 0.466542883 | 0.466542883 | -5.362606374 |
| 1439505_at   | 0.051268442  | 3.679666603 | 0.758816876  | 0.466554477 | 0.466554477 | -5.362620325 |
| 1428006_at   | -0.054322346 | 3.53017554  | -0.758705956 | 0.466617746 | 0.466617746 | -5.362696447 |
| 1435760_at   | 0.053182751  | 3.215335212 | 0.758689997  | 0.466626849 | 0.466626849 | -5.362707398 |
| 1446768_at   | -0.103856884 | 4.527019787 | -0.758652033 | 0.466648505 | 0.466648505 | -5.362733448 |
| 1440949_at   | -0.052568851 | 3.510571927 | -0.758649176 | 0.466650135 | 0.466650135 | -5.362735409 |
| 1430690_at   | -0.09232256  | 4.069580536 | -0.758584496 | 0.466687032 | 0.466687032 | -5.36277979  |
| 1426858_at   | -0.090455786 | 4.732954624 | -0.758536474 | 0.466714428 | 0.466714428 | -5.362812738 |
| 1447263_at   | 0.102073777  | 5.709419389 | 0.758512437  | 0.466728141 | 0.466728141 | -5.362829229 |
| 1447927_at   | 0.068730325  | 4.453781203 | 0.758462805  | 0.466756457 | 0.466756457 | -5.36286328  |
| 1455804_x_at | -0.074038901 | 6.852314161 | -0.758423311 | 0.46677899  | 0.46677899  | -5.362890374 |
| 1430844_at   | 0.061871278  | 4.940701481 | 0.758418721  | 0.466781609 | 0.466781609 | -5.362893522 |
| 1455749_x_at | 0.04911404   | 8.370448995 | 0.758405118  | 0.46678937  | 0.46678937  | -5.362902853 |
| 1434150_a_at | -0.099295865 | 6.795475711 | -0.75840405  | 0.466789979 | 0.466789979 | -5.362903586 |
| 1443908_at   | -0.0667636   | 4.77692371  | -0.758377059 | 0.466805379 | 0.466805379 | -5.362922101 |
| 1427105_at   | -0.055153978 | 9.120086618 | -0.758314222 | 0.466841233 | 0.466841233 | -5.362965204 |
| 1460590_s_at | 0.060857391  | 11.81289964 | 0.758284401  | 0.466858249 | 0.466858249 | -5.362985659 |
| 1459083_at   | -0.061203088 | 4.239072434 | -0.75823463  | 0.466886649 | 0.466886649 | -5.363019795 |
| 1455619_at   | -0.089664752 | 4.148668487 | -0.758223137 | 0.466893208 | 0.466893208 | -5.363027677 |
| 1434421_at   | 0.074406949  | 6.291733708 | 0.758216904  | 0.466896764 | 0.466896764 | -5.363031952 |
| 1429774_a_at | 0.051968303  | 6.453346337 | 0.758197224  | 0.466907995 | 0.466907995 | -5.36304545  |
| 1441239_at   | 0.054193944  | 7.468942254 | 0.758115938  | 0.466954382 | 0.466954382 | -5.363101195 |
| 1458744_at   | 0.048281566  | 3.063214505 | 0.758100389  | 0.466963255 | 0.466963255 | -5.363111858 |
| 1451459_at   | 0.050288728  | 8.543190875 | 0.758045748  | 0.46699444  | 0.46699444  | -5.363149327 |
| 1440303_at   | -0.068877238 | 6.004283431 | -0.757984494 | 0.467029399 | 0.467029399 | -5.363191328 |
| 1425748_at   | -0.073128474 | 4.421721374 | -0.757908856 | 0.46707257  | 0.46707257  | -5.363243187 |
| 1418039_at   | -0.059590222 | 8.553643045 | -0.757895383 | 0.467080261 | 0.467080261 | -5.363252424 |
| 1421074_at   | 0.067314547  | 8.33719298  | 0.757816637  | 0.467125209 | 0.467125209 | -5.363306409 |
| 1454006_a_at | -0.066105451 | 6.577329017 | -0.757761025 | 0.467156954 | 0.467156954 | -5.363344531 |
| 1424134_at   | 0.081014803  | 9.259285441 | 0.757669146  | 0.467209405 | 0.467209405 | -5.363407509 |
| 1451185_at   | -0.067530101 | 10.31833904 | -0.757663281 | 0.467212753 | 0.467212753 | -5.363411529 |
| 1426492_at   | 0.055902884  | 8.446441736 | 0.757659975  | 0.46721464  | 0.46721464  | -5.363413795 |
| 1453844_at   | 0.068382385  | 5.845964595 | 0.757658633  | 0.467215406 | 0.467215406 | -5.363414714 |
| 1416101_a_at | -0.089629311 | 9.409914436 | -0.757598714 | 0.467249614 | 0.467249614 | -5.363455782 |
| 1450139_at   | -0.082559299 | 3.902578359 | -0.75756256  | 0.467270256 | 0.467270256 | -5.36348056  |
| 1450930_at   | 0.081369852  | 4.578848395 | 0.757553813  | 0.46727525  | 0.46727525  | -5.363486554 |
| 1421308_at   | -0.101229815 | 4.361350397 | -0.757511633 | 0.467299332 | 0.467299332 | -5.36351546  |
| 1416413_at   | -0.048103138 | 3.285759644 | -0.757483509 | 0.46731539  | 0.46731539  | -5.363534733 |
| 1429615_at   | -0.04898194  | 9.723180916 | -0.757421557 | 0.467350764 | 0.467350764 | -5.363577185 |
| 1435943_at   | 0.058420154  | 5.180573715 | 0.757421272  | 0.467350927 | 0.467350927 | -5.36357738  |
| 1446695_at   | -0.059458577 | 3.270484442 | -0.757419113 | 0.46735216  | 0.46735216  | -5.36357886  |
| 1420483_at   | -0.050361724 | 6.259489834 | -0.757401023 | 0.467362489 | 0.467362489 | -5.363591255 |
| 1421209_s_at | 0.061935019  | 7.316961131 | 0.757396316  | 0.467365177 | 0.467365177 | -5.36359448  |
| 1424617_at   | 0.065633931  | 6.423539339 | 0.757342485  | 0.467395915 | 0.467395915 | -5.363631364 |
| 1449792_at   | -0.059560627 | 3.973114847 | -0.757334736 | 0.46740034  | 0.46740034  | -5.363636673 |
| 1459535_at   | 0.051393735  | 3.839509847 | 0.757302576  | 0.467418705 | 0.467418705 | -5.363658707 |
| 1449120_a_at | -0.065456932 | 5.594324362 | -0.757291395 | 0.46742509  | 0.46742509  | -5.363666367 |

|              |              |             |              |             |             |              |
|--------------|--------------|-------------|--------------|-------------|-------------|--------------|
| 1423182_at   | -0.094465513 | 4.647018153 | -0.757222496 | 0.467464437 | 0.467464437 | -5.363713569 |
| 1438806_at   | -0.051232677 | 4.512620014 | -0.757128175 | 0.467518304 | 0.467518304 | -5.363778181 |
| 1440236_at   | 0.10802137   | 3.855641523 | 0.757116797  | 0.467524802 | 0.467524802 | -5.363785974 |
| 1434184_s_at | 0.056844635  | 9.789457163 | 0.757107964  | 0.467529847 | 0.467529847 | -5.363792025 |
| 1449637_at   | 0.056574024  | 3.54301139  | 0.757102026  | 0.467533239 | 0.467533239 | -5.363796092 |
| 1452100_at   | -0.08194093  | 9.033626981 | -0.757080782 | 0.467545372 | 0.467545372 | -5.363810643 |
| 1455384_x_at | 0.070638946  | 6.700591237 | 0.757070347  | 0.467551333 | 0.467551333 | -5.363817791 |
| 1421018_at   | -0.066784237 | 7.175894459 | -0.757043434 | 0.467566704 | 0.467566704 | -5.363836224 |
| 1420529_at   | 0.060659069  | 5.6599822   | 0.756980078  | 0.467602892 | 0.467602892 | -5.363879616 |
| 1451127_at   | 0.07862824   | 8.436923695 | 0.756978574  | 0.467603751 | 0.467603751 | -5.363880647 |
| 1419633_at   | -0.07358246  | 3.589290402 | -0.756927402 | 0.467632981 | 0.467632981 | -5.363915691 |
| 1443862_at   | 0.053690302  | 8.846747771 | 0.75692401   | 0.467634919 | 0.467634919 | -5.363918014 |
| 1426817_at   | 0.054298984  | 10.99837098 | 0.756907725  | 0.467644221 | 0.467644221 | -5.363929167 |
| 1450302_at   | 0.071171108  | 4.997170674 | 0.756799763  | 0.467705895 | 0.467705895 | -5.364003096 |
| 1418844_at   | 0.083345123  | 8.094848811 | 0.756788589  | 0.467712278 | 0.467712278 | -5.364010747 |
| 1448855_at   | 0.048149791  | 10.008672   | 0.756714078  | 0.467754847 | 0.467754847 | -5.364061763 |
| 1436850_at   | -0.081428631 | 4.604592731 | -0.756694564 | 0.467765995 | 0.467765995 | -5.364075123 |
| 1424045_at   | 0.071784919  | 9.411661295 | 0.756671952  | 0.467778914 | 0.467778914 | -5.364090604 |
| 1419106_at   | 0.067143606  | 4.169433148 | 0.756651979  | 0.467790325 | 0.467790325 | -5.364104278 |
| 1431878_at   | 0.082428835  | 4.801066624 | 0.756644536  | 0.467794578 | 0.467794578 | -5.364109374 |
| 1441678_at   | -0.053590008 | 3.156136086 | -0.756538944 | 0.467854911 | 0.467854911 | -5.364181658 |
| 1438229_at   | 0.06055443   | 8.564985327 | 0.756507433  | 0.467872916 | 0.467872916 | -5.364203227 |
| 1453363_at   | -0.061392183 | 6.31621491  | -0.75645348  | 0.467903746 | 0.467903746 | -5.364240157 |
| 1444482_at   | 0.111857955  | 4.109558297 | 0.756398436  | 0.467935201 | 0.467935201 | -5.364277831 |
| 1433351_at   | -0.071283627 | 5.875977302 | -0.75638226  | 0.467944445 | 0.467944445 | -5.364288902 |
| 1430338_at   | -0.067651567 | 3.774140986 | -0.756364416 | 0.467954642 | 0.467954642 | -5.364301114 |
| 1417128_at   | 0.087733998  | 7.076794796 | 0.75634881   | 0.467963561 | 0.467963561 | -5.364311794 |
| 1429861_at   | 0.098780662  | 7.768306966 | 0.75631123   | 0.467985037 | 0.467985037 | -5.364337512 |
| 1444184_at   | 0.048971223  | 7.615471197 | 0.756215121  | 0.468039966 | 0.468039966 | -5.36440328  |
| 1426882_at   | 0.049080225  | 8.484312348 | 0.756202161  | 0.468047373 | 0.468047373 | -5.364412148 |
| 1459567_at   | -0.062832198 | 4.198292607 | -0.756168999 | 0.468066327 | 0.468066327 | -5.364434839 |
| 1450468_at   | 0.066178931  | 3.860343133 | 0.756149354  | 0.468077555 | 0.468077555 | -5.364448281 |
| 1422817_at   | -0.063317181 | 4.174978251 | -0.756143031 | 0.468081169 | 0.468081169 | -5.364452607 |
| 1427473_at   | 0.068040531  | 3.66107972  | 0.756115798  | 0.468096735 | 0.468096735 | -5.36447124  |
| 1422658_at   | -0.066604991 | 3.570241137 | -0.756112451 | 0.468098649 | 0.468098649 | -5.36447353  |
| 1459682_at   | 0.070638789  | 3.412932911 | 0.756101026  | 0.468105179 | 0.468105179 | -5.364481346 |
| 1445960_at   | 0.059699331  | 4.154459626 | 0.756071827  | 0.468121869 | 0.468121869 | -5.364501323 |
| 1428475_at   | 0.058274157  | 9.12688118  | 0.756046677  | 0.468136245 | 0.468136245 | -5.36451853  |
| 1440585_at   | -0.054898412 | 5.388591608 | -0.755959434 | 0.468186117 | 0.468186117 | -5.364578212 |
| 1421790_a_at | -0.05469114  | 5.509687814 | -0.755868796 | 0.468237932 | 0.468237932 | -5.364640211 |
| 1442118_at   | -0.06752469  | 4.704027715 | -0.75582856  | 0.468260936 | 0.468260936 | -5.364667732 |
| 1416967_at   | -0.081394762 | 9.461830004 | -0.755803691 | 0.468275154 | 0.468275154 | -5.364684741 |
| 1420745_a_at | 0.07583118   | 8.606297356 | 0.755751806  | 0.468304819 | 0.468304819 | -5.364720226 |
| 1419058_at   | -0.078728691 | 6.826123106 | -0.755743484 | 0.468309576 | 0.468309576 | -5.364725917 |
| 1440238_at   | -0.092001263 | 7.695830065 | -0.75570388  | 0.46833222  | 0.46833222  | -5.364753002 |
| 1427646_a_at | -0.057549372 | 7.104266199 | -0.755688136 | 0.468341223 | 0.468341223 | -5.364763769 |
| 1457676_at   | -0.05053171  | 7.844250444 | -0.755616176 | 0.468382369 | 0.468382369 | -5.364812976 |
| 1438052_at   | 0.072917088  | 3.91546102  | 0.755522735  | 0.468435802 | 0.468435802 | -5.364876867 |
| 1449044_at   | 0.047877918  | 9.498332402 | 0.755498244  | 0.468449807 | 0.468449807 | -5.364893612 |
| 1457681_at   | -0.070194871 | 4.36227949  | -0.755455832 | 0.468474062 | 0.468474062 | -5.364922608 |
| 1433997_at   | -0.048558696 | 10.4565497  | -0.755405086 | 0.468503083 | 0.468503083 | -5.364957301 |
| 1436403_at   | 0.064026131  | 7.43284554  | 0.755304527  | 0.468560596 | 0.468560596 | -5.365026042 |
| 1434487_at   | 0.081545151  | 9.203395706 | 0.755248289  | 0.468592762 | 0.468592762 | -5.365064482 |

|              |              |             |              |             |             |              |
|--------------|--------------|-------------|--------------|-------------|-------------|--------------|
| 1418139_at   | 0.191957846  | 6.274924453 | 0.755226973  | 0.468604955 | 0.468604955 | -5.365079051 |
| 1458693_at   | -0.066356109 | 5.302954933 | -0.75516328  | 0.468641387 | 0.468641387 | -5.365122583 |
| 1438762_at   | 0.068670698  | 8.276359759 | 0.755136224  | 0.468656864 | 0.468656864 | -5.365141074 |
| 1460632_at   | 0.094734466  | 7.602389747 | 0.755034837  | 0.468714862 | 0.468714862 | -5.365210359 |
| 1446899_at   | 0.070071151  | 6.227126485 | 0.755010152  | 0.468728984 | 0.468728984 | -5.365227227 |
| 1454911_at   | 0.0571752    | 3.4511434   | 0.754956146  | 0.468759881 | 0.468759881 | -5.365264129 |
| 1446250_at   | 0.070694284  | 3.164103853 | 0.754954049  | 0.468761081 | 0.468761081 | -5.365265562 |
| 1416414_at   | -0.060404972 | 9.772087837 | -0.75486376  | 0.468812738 | 0.468812738 | -5.365327251 |
| 1434138_at   | 0.070024829  | 7.888998381 | 0.754831215  | 0.468831358 | 0.468831358 | -5.365349485 |
| 1444073_at   | -0.05560598  | 7.384694826 | -0.754774504 | 0.468863807 | 0.468863807 | -5.365388227 |
| 1442215_at   | -0.079664774 | 3.887541002 | -0.754717144 | 0.468896629 | 0.468896629 | -5.36542741  |
| 1436414_at   | -0.097719436 | 7.117617041 | -0.754584678 | 0.468972433 | 0.468972433 | -5.365517889 |
| 1443561_at   | -0.137845266 | 6.488280738 | -0.754545298 | 0.468994969 | 0.468994969 | -5.365544784 |
| 1448411_at   | -0.048408075 | 7.797466625 | -0.754392077 | 0.469082662 | 0.469082662 | -5.365649417 |
| 1429248_at   | 0.063754333  | 7.956152582 | 0.754386178  | 0.469086038 | 0.469086038 | -5.365653445 |
| 1427902_at   | -0.075652525 | 8.767768625 | -0.754342427 | 0.469111081 | 0.469111081 | -5.365683319 |
| 1416473_a_at | -0.06211265  | 10.45949681 | -0.754303185 | 0.469133543 | 0.469133543 | -5.365710112 |
| 1422511_a_at | 0.047366882  | 9.395692412 | 0.75420337   | 0.469190679 | 0.469190679 | -5.365778258 |
| 1423809_at   | 0.0600137    | 9.892793801 | 0.754202102  | 0.469191405 | 0.469191405 | -5.365779123 |
| 1458262_at   | 0.060033827  | 3.263924171 | 0.75417623   | 0.469206216 | 0.469206216 | -5.365796786 |
| 1448226_at   | 0.085839414  | 9.221944207 | 0.754090786  | 0.469255131 | 0.469255131 | -5.365855112 |
| 1426016_a_at | 0.050727955  | 9.115441801 | 0.754059554  | 0.469273011 | 0.469273011 | -5.36587643  |
| 1437070_at   | 0.071625956  | 8.897642253 | 0.753969263  | 0.469324706 | 0.469324706 | -5.365938057 |
| 1437584_at   | -0.056348345 | 4.775830019 | -0.75392155  | 0.469352025 | 0.469352025 | -5.36597062  |
| 1459783_s_at | 0.083324803  | 8.568030655 | 0.753848529  | 0.469393836 | 0.469393836 | -5.366020451 |
| 1438857_x_at | -0.07055085  | 7.366239138 | -0.753824009 | 0.469407877 | 0.469407877 | -5.366037184 |
| 1454505_at   | -0.069696331 | 4.795515572 | -0.753815397 | 0.469412808 | 0.469412808 | -5.36604306  |
| 1439255_s_at | -0.060455924 | 7.495322007 | -0.753812476 | 0.46941448  | 0.46941448  | -5.366045053 |
| 1436079_s_at | 0.058074539  | 7.288431998 | 0.753747003  | 0.469451973 | 0.469451973 | -5.366089729 |
| 1448285_at   | 0.140565697  | 4.622619556 | 0.753734082  | 0.469459372 | 0.469459372 | -5.366098545 |
| 1456042_s_at | 0.064964842  | 9.529305146 | 0.753725926  | 0.469464043 | 0.469464043 | -5.36610411  |
| 1450352_at   | -0.054073379 | 4.310575625 | -0.753725223 | 0.469464446 | 0.469464446 | -5.36610459  |
| 1421005_at   | 0.088205474  | 5.285726655 | 0.753608669  | 0.469531195 | 0.469531195 | -5.366184109 |
| 1447151_at   | 0.047713717  | 4.478451848 | 0.753604083  | 0.469533822 | 0.469533822 | -5.366187238 |
| 1439060_s_at | -0.0536731   | 9.247138736 | -0.75354313  | 0.469568731 | 0.469568731 | -5.366228819 |
| 1438492_at   | 0.05573264   | 4.193706623 | 0.753525029  | 0.469579099 | 0.469579099 | -5.366241167 |
| 1456072_at   | -0.056541281 | 9.461356162 | -0.753522799 | 0.469580376 | 0.469580376 | -5.366242688 |
| 1440940_at   | -0.087172758 | 5.931672573 | -0.753442593 | 0.469626316 | 0.469626316 | -5.366297398 |
| 1443645_at   | 0.064502088  | 4.125900209 | 0.753437961  | 0.469628969 | 0.469628969 | -5.366300557 |
| 1418394_a_at | -0.068166395 | 7.729040905 | -0.753431148 | 0.469632872 | 0.469632872 | -5.366305204 |
| 1443679_at   | 0.061029452  | 5.311700764 | 0.753363626  | 0.469671549 | 0.469671549 | -5.366351257 |
| 1447041_at   | 0.060472761  | 4.532546608 | 0.753363222  | 0.46967178  | 0.46967178  | -5.366351532 |
| 1446534_at   | 0.071716866  | 4.145668267 | 0.753347873  | 0.469680573 | 0.469680573 | -5.366362001 |
| 1417014_at   | 0.089112817  | 7.048247332 | 0.753327049  | 0.469692502 | 0.469692502 | -5.366376203 |
| 1441130_at   | -0.058650641 | 3.23356168  | -0.753321129 | 0.469695893 | 0.469695893 | -5.36638024  |
| 1428858_at   | 0.084163665  | 7.982727048 | 0.753317132  | 0.469698182 | 0.469698182 | -5.366382965 |
| 1439729_at   | 0.063906022  | 3.79356125  | 0.753283741  | 0.469717311 | 0.469717311 | -5.366405738 |
| 1419510_at   | -0.053925263 | 3.606782058 | -0.753273656 | 0.469723088 | 0.469723088 | -5.366412615 |
| 1428667_at   | 0.065935603  | 9.540518061 | 0.753267803  | 0.469726441 | 0.469726441 | -5.366416606 |
| 1454857_at   | 0.052855529  | 8.834896118 | 0.753248459  | 0.469737523 | 0.469737523 | -5.366429798 |
| 1443062_at   | -0.110922574 | 6.541100263 | -0.753239975 | 0.469742383 | 0.469742383 | -5.366435583 |
| 1456431_at   | -0.055069323 | 5.533533557 | -0.753239524 | 0.469742641 | 0.469742641 | -5.366435891 |
| 1437305_at   | 0.148674525  | 5.035389836 | 0.753235863  | 0.469744739 | 0.469744739 | -5.366438387 |

|              |              |             |              |             |             |              |
|--------------|--------------|-------------|--------------|-------------|-------------|--------------|
| 1448313_at   | 0.062361579  | 9.49631108  | 0.753229438  | 0.46974842  | 0.46974842  | -5.366442768 |
| 1456436_x_at | 0.04869416   | 13.39760893 | 0.753196984  | 0.469767012 | 0.469767012 | -5.366464899 |
| 1457601_at   | -0.048001501 | 3.139206201 | -0.75317678  | 0.469778587 | 0.469778587 | -5.366478675 |
| 1450381_a_at | 0.070343303  | 5.228260359 | 0.753121657  | 0.469810169 | 0.469810169 | -5.366516261 |
| 1425777_at   | -0.051590488 | 5.15691605  | -0.753109679 | 0.469817031 | 0.469817031 | -5.366524428 |
| 1423112_at   | 0.065949454  | 8.123349391 | 0.753099502  | 0.469822862 | 0.469822862 | -5.366531367 |
| 1453742_at   | 0.077343456  | 6.734657591 | 0.753082791  | 0.469832437 | 0.469832437 | -5.366542761 |
| 1446431_at   | 0.060052113  | 4.895795531 | 0.753075608  | 0.469836552 | 0.469836552 | -5.366547658 |
| 1459853_x_at | 0.080330018  | 8.555076964 | 0.753045271  | 0.469853934 | 0.469853934 | -5.366568341 |
| 1419544_at   | -0.051970345 | 8.886282626 | -0.753024694 | 0.469865724 | 0.469865724 | -5.36658237  |
| 1440988_at   | -0.051787783 | 3.812174131 | -0.753007109 | 0.4698758   | 0.4698758   | -5.366594358 |
| 1445063_at   | 0.050396865  | 5.582051616 | 0.752985831  | 0.469887993 | 0.469887993 | -5.366608864 |
| 1447567_at   | 0.165699385  | 7.732205736 | 0.752977964  | 0.4698925   | 0.4698925   | -5.366614227 |
| 1423502_at   | 0.05593575   | 9.474181888 | 0.75294054   | 0.469913945 | 0.469913945 | -5.366639739 |
| 1419312_at   | -0.218809176 | 6.812000925 | -0.752919167 | 0.469926192 | 0.469926192 | -5.366654308 |
| 1460094_at   | -0.087505794 | 5.580227845 | -0.752889087 | 0.469943428 | 0.469943428 | -5.366674812 |
| 1456629_at   | -0.060608961 | 7.258529158 | -0.752867701 | 0.469955684 | 0.469955684 | -5.36668939  |
| 1456696_x_at | 0.065645436  | 6.703851991 | 0.752861371  | 0.469959311 | 0.469959311 | -5.366693704 |
| 1416556_at   | -0.047536848 | 10.98089313 | -0.752856701 | 0.469961987 | 0.469961987 | -5.366696888 |
| 1439215_at   | 0.060912317  | 3.95227863  | 0.752827098  | 0.469978952 | 0.469978952 | -5.366717065 |
| 1451590_at   | -0.060897744 | 3.769823919 | -0.752825566 | 0.469979829 | 0.469979829 | -5.366718109 |
| 1429818_at   | 0.050301776  | 3.871785617 | 0.752807802  | 0.46999001  | 0.46999001  | -5.366730217 |
| 1421479_at   | -0.056897894 | 6.739993071 | -0.752722317 | 0.470039001 | 0.470039001 | -5.366788479 |
| 1448550_at   | 0.053352898  | 6.907096464 | 0.752658411  | 0.470075627 | 0.470075627 | -5.36683203  |
| 1445045_at   | -0.059534829 | 3.518950747 | -0.752650337 | 0.470080255 | 0.470080255 | -5.366837532 |
| 1425655_at   | 0.069893599  | 3.302342799 | 0.752610057  | 0.470103341 | 0.470103341 | -5.366864981 |
| 1437068_at   | -0.102885371 | 6.095484566 | -0.752578948 | 0.470121173 | 0.470121173 | -5.366886179 |
| 1429218_at   | 0.049892885  | 7.648909182 | 0.752525981  | 0.470151533 | 0.470151533 | -5.366922269 |
| 1435181_at   | -0.085167691 | 7.770614104 | -0.752489994 | 0.470172161 | 0.470172161 | -5.366946789 |
| 1448849_at   | 0.047481341  | 9.714801405 | 0.752414298  | 0.470215553 | 0.470215553 | -5.366998361 |
| 1457732_at   | 0.100785425  | 5.633193171 | 0.752169252  | 0.47035604  | 0.47035604  | -5.367165279 |
| 1427827_at   | -0.07804697  | 5.245533949 | -0.752147553 | 0.470368482 | 0.470368482 | -5.367180058 |
| 1430586_at   | -0.061609249 | 3.776657514 | -0.752058341 | 0.470419635 | 0.470419635 | -5.367240813 |
| 1417718_at   | 0.055186538  | 11.31646288 | 0.752039489  | 0.470430445 | 0.470430445 | -5.367253651 |
| 1421191_s_at | -0.065880824 | 8.301394418 | -0.752035033 | 0.470433001 | 0.470433001 | -5.367256685 |
| 1458065_at   | -0.056957216 | 6.593799663 | -0.751892165 | 0.47051493  | 0.47051493  | -5.367353967 |
| 1458179_at   | 0.107204329  | 8.045197876 | 0.751806818  | 0.470563876 | 0.470563876 | -5.367412072 |
| 1453884_at   | -0.051469948 | 3.161216865 | -0.751749579 | 0.470596706 | 0.470596706 | -5.367451039 |
| 1426416_a_at | 0.059529014  | 9.079741162 | 0.751723928  | 0.470611418 | 0.470611418 | -5.3674685   |
| 1430106_at   | -0.051290372 | 3.412334765 | -0.75169397  | 0.470628601 | 0.470628601 | -5.367488893 |
| 1449228_at   | 0.114399888  | 5.107534889 | 0.75168585   | 0.470633259 | 0.470633259 | -5.367494421 |
| 1434434_s_at | 0.05349822   | 10.98937995 | 0.751644193  | 0.470657152 | 0.470657152 | -5.367522775 |
| 1429885_at   | 0.061510872  | 5.335480953 | 0.751611964  | 0.47067564  | 0.47067564  | -5.367544713 |
| 1448211_at   | -0.140448661 | 6.973982887 | -0.75160935  | 0.470677139 | 0.470677139 | -5.367546491 |
| 1438926_at   | 0.077830689  | 3.421098722 | 0.751562085  | 0.470704251 | 0.470704251 | -5.367578661 |
| 1458921_at   | -0.054015784 | 4.694416764 | -0.751534194 | 0.470720251 | 0.470720251 | -5.367597643 |
| 1455502_at   | -0.053164556 | 6.714843338 | -0.751482997 | 0.470749621 | 0.470749621 | -5.367632486 |
| 1433161_at   | -0.072587689 | 5.032371085 | -0.751447924 | 0.470769741 | 0.470769741 | -5.367656353 |
| 1459803_x_at | -0.079545044 | 3.168845619 | -0.751342669 | 0.470830128 | 0.470830128 | -5.367727976 |
| 1427198_at   | 0.086951834  | 4.865973768 | 0.751326586  | 0.470839355 | 0.470839355 | -5.367738919 |
| 1451723_at   | 0.070573877  | 6.094397734 | 0.75130693   | 0.470850633 | 0.470850633 | -5.367752293 |
| 1442153_at   | 0.32336054   | 5.52781919  | 0.751303412  | 0.470852651 | 0.470852651 | -5.367754686 |
| 1436540_at   | -0.065847441 | 8.854449049 | -0.751243531 | 0.470887009 | 0.470887009 | -5.367795428 |

|              |              |             |              |             |             |              |
|--------------|--------------|-------------|--------------|-------------|-------------|--------------|
| 1417548_at   | 0.065632546  | 7.465835303 | 0.751219815  | 0.470900617 | 0.470900617 | -5.367811562 |
| 1437578_at   | 0.050516353  | 2.973141993 | 0.751112834  | 0.470962004 | 0.470962004 | -5.36788434  |
| 1427687_at   | -0.098013535 | 3.970852189 | -0.75105395  | 0.470995795 | 0.470995795 | -5.367924394 |
| 1457085_at   | 0.086369713  | 3.550314513 | 0.751042296  | 0.471002483 | 0.471002483 | -5.367932321 |
| 1424234_s_at | 0.092388971  | 9.365000762 | 0.75090611   | 0.471080641 | 0.471080641 | -5.368024946 |
| 1443795_at   | -0.04892534  | 3.86671715  | -0.750883046 | 0.471093878 | 0.471093878 | -5.368040631 |
| 1423736_a_at | -0.066484832 | 8.449500372 | -0.750872556 | 0.471099898 | 0.471099898 | -5.368047764 |
| 1454764_s_at | 0.066309809  | 9.384093638 | 0.750826454  | 0.471126359 | 0.471126359 | -5.368079115 |
| 1439027_at   | 0.055682617  | 8.654031517 | 0.750784707  | 0.471150321 | 0.471150321 | -5.368107504 |
| 1447785_x_at | -0.066703556 | 3.896633134 | -0.750776261 | 0.471155169 | 0.471155169 | -5.368113247 |
| 1425915_at   | -0.051040774 | 5.351659594 | -0.750705851 | 0.471195585 | 0.471195585 | -5.368161122 |
| 1425934_a_at | 0.067798297  | 7.107896001 | 0.750659427  | 0.471222234 | 0.471222234 | -5.368192686 |
| 1451101_a_at | 0.054434529  | 13.79452356 | 0.750614516  | 0.471248015 | 0.471248015 | -5.368223219 |
| 1445516_at   | -0.055446104 | 4.848192277 | -0.750531601 | 0.471295615 | 0.471295615 | -5.368279586 |
| 1431679_at   | -0.077760389 | 3.820854258 | -0.750527712 | 0.471297848 | 0.471297848 | -5.36828223  |
| 1424587_at   | 0.056209606  | 6.009153838 | 0.750496465  | 0.471315787 | 0.471315787 | -5.36830347  |
| 1428821_at   | 0.051868295  | 7.485882852 | 0.750468913  | 0.471331606 | 0.471331606 | -5.368322199 |
| 1440436_at   | -0.079667378 | 4.367611718 | -0.75041878  | 0.471360389 | 0.471360389 | -5.368356275 |
| 1453273_at   | -0.078772729 | 4.0773054   | -0.7504063   | 0.471367554 | 0.471367554 | -5.368364757 |
| 1440211_at   | -0.066702804 | 4.481485466 | -0.750375614 | 0.471385173 | 0.471385173 | -5.368385614 |
| 1452157_at   | -0.082860805 | 9.804054509 | -0.750316368 | 0.471419191 | 0.471419191 | -5.368425879 |
| 1418210_at   | 0.067858131  | 11.44836719 | 0.750263366  | 0.471449626 | 0.471449626 | -5.3684619   |
| 1441970_at   | 0.056777793  | 8.887077847 | 0.75023579   | 0.47146546  | 0.47146546  | -5.368480639 |
| 1419226_at   | -0.050913603 | 4.638976052 | -0.750196003 | 0.471488308 | 0.471488308 | -5.368507675 |
| 1458736_at   | -0.062821133 | 3.131839696 | -0.750152269 | 0.471513423 | 0.471513423 | -5.368537393 |
| 1454487_at   | -0.088589965 | 6.848195985 | -0.750139791 | 0.471520589 | 0.471520589 | -5.368545872 |
| 1427304_at   | 0.0751127    | 6.824737126 | 0.750085427  | 0.471551809 | 0.471551809 | -5.368582809 |
| 1431245_at   | -0.078207306 | 3.861783668 | -0.750076323 | 0.471557038 | 0.471557038 | -5.368588995 |
| 1457695_at   | 0.060765582  | 6.769904454 | 0.749936264  | 0.471637479 | 0.471637479 | -5.368684146 |
| 1436699_x_at | 0.056164556  | 12.48640108 | 0.749874851  | 0.471672753 | 0.471672753 | -5.368725863 |
| 1440820_x_at | -0.047526042 | 3.253582284 | -0.74982985  | 0.471698602 | 0.471698602 | -5.36875643  |
| 1421505_at   | -0.0731335   | 4.342151092 | -0.749794628 | 0.471718835 | 0.471718835 | -5.368780354 |
| 1446947_at   | -0.063266449 | 5.566528732 | -0.749760582 | 0.471738392 | 0.471738392 | -5.368803477 |
| 1444639_at   | 0.088225843  | 5.5339854   | 0.749727092  | 0.471757631 | 0.471757631 | -5.368826222 |
| 1440210_at   | 0.058596789  | 5.755513401 | 0.749704631  | 0.471770534 | 0.471770534 | -5.368841477 |
| 1448762_at   | 0.054037516  | 9.026261966 | 0.749671421  | 0.471789612 | 0.471789612 | -5.368864029 |
| 1418755_at   | -0.162158796 | 7.477126062 | -0.749666811 | 0.471792261 | 0.471792261 | -5.36886716  |
| 1459676_at   | 0.082503324  | 4.933576705 | 0.74964851   | 0.471802775 | 0.471802775 | -5.368879589 |
| 1442828_at   | 0.054621864  | 6.721673008 | 0.749622569  | 0.471817678 | 0.471817678 | -5.368897205 |
| 1454250_at   | -0.069509344 | 4.986549933 | -0.749596609 | 0.471832593 | 0.471832593 | -5.368914833 |
| 1420715_a_at | 0.067415202  | 4.424433556 | 0.749557779  | 0.471854902 | 0.471854902 | -5.3689412   |
| 1455926_at   | -0.104051511 | 5.090060684 | -0.749539371 | 0.471865478 | 0.471865478 | -5.368953699 |
| 1424358_at   | -0.065582587 | 8.569572837 | -0.74953205  | 0.471869684 | 0.471869684 | -5.368958669 |
| 1433137_at   | 0.090314389  | 3.876732103 | 0.74950515   | 0.47188514  | 0.47188514  | -5.368976934 |
| 1460240_a_at | 0.049313517  | 12.51553905 | 0.74948594   | 0.471896177 | 0.471896177 | -5.368989977 |
| 1427648_at   | -0.054344339 | 3.805878351 | -0.74943848  | 0.471923447 | 0.471923447 | -5.3690222   |
| 1442735_at   | 0.071186016  | 4.30508464  | 0.749412708  | 0.471938255 | 0.471938255 | -5.369039696 |
| 1443722_at   | -0.052755251 | 6.425667765 | -0.749341444 | 0.471979205 | 0.471979205 | -5.369088076 |
| 1434817_s_at | 0.091804014  | 5.519383907 | 0.749319299  | 0.471991931 | 0.471991931 | -5.369103108 |
| 1415703_at   | -0.071453217 | 9.735333818 | -0.749306247 | 0.471999431 | 0.471999431 | -5.369111968 |
| 1445929_at   | -0.062586699 | 4.343862713 | -0.749260973 | 0.472025448 | 0.472025448 | -5.3691427   |
| 1441940_x_at | 0.057306282  | 4.571031112 | 0.749255242  | 0.472028742 | 0.472028742 | -5.36914659  |
| 1459816_x_at | -0.072468344 | 6.177564473 | -0.749235712 | 0.472039965 | 0.472039965 | -5.369159847 |



|              |              |             |              |             |             |              |
|--------------|--------------|-------------|--------------|-------------|-------------|--------------|
| 1421626_at   | -0.061724388 | 4.022299993 | -0.749224156 | 0.472046606 | 0.472046606 | -5.36916769  |
| 1456303_at   | 0.075961735  | 8.900807519 | 0.749201662  | 0.472059533 | 0.472059533 | -5.369182958 |
| 1449249_at   | -0.058318361 | 6.55354579  | -0.74919953  | 0.472060759 | 0.472060759 | -5.369184405 |
| 1453732_at   | -0.091279395 | 6.765082338 | -0.74917234  | 0.472076385 | 0.472076385 | -5.369202859 |
| 1459727_at   | -0.050224259 | 4.002015283 | -0.749147324 | 0.472090762 | 0.472090762 | -5.369219838 |
| 1431929_a_at | 0.052297376  | 8.042452444 | 0.749145102  | 0.472092039 | 0.472092039 | -5.369221346 |
| 1439084_at   | 0.057360593  | 5.1972842   | 0.749110026  | 0.472112199 | 0.472112199 | -5.369245151 |
| 1435583_at   | 0.054562026  | 4.294430223 | 0.748989804  | 0.472181298 | 0.472181298 | -5.369326735 |
| 1446922_at   | -0.084099088 | 3.793925064 | -0.748988323 | 0.47218215  | 0.47218215  | -5.36932774  |
| 1428630_x_at | 0.054258847  | 7.254530889 | 0.748968867  | 0.472193333 | 0.472193333 | -5.369340942 |
| 1424980_s_at | -0.049039223 | 8.994100526 | -0.748944441 | 0.472207373 | 0.472207373 | -5.369357516 |
| 1436525_at   | 0.067726965  | 7.131377966 | 0.748922204  | 0.472220155 | 0.472220155 | -5.369372604 |
| 1432021_at   | -0.056213168 | 3.719985051 | -0.748865355 | 0.472252835 | 0.472252835 | -5.369411176 |
| 1454507_at   | 0.056597338  | 3.506929222 | 0.748861726  | 0.472254921 | 0.472254921 | -5.369413638 |
| 1434836_at   | 0.055092029  | 8.038757044 | 0.748759693  | 0.472313577 | 0.472313577 | -5.36948286  |
| 1447156_at   | 0.078614076  | 7.39823624  | 0.748630499  | 0.472387854 | 0.472387854 | -5.369570496 |
| 1427837_at   | -0.061662139 | 3.313594125 | -0.74859517  | 0.472408167 | 0.472408167 | -5.369594459 |
| 1429829_at   | -0.072945526 | 3.657786761 | -0.748501519 | 0.472462016 | 0.472462016 | -5.369657974 |
| 1457435_x_at | -0.431682203 | 6.875955234 | -0.748497069 | 0.472464575 | 0.472464575 | -5.369660992 |
| 1447891_at   | -0.083032893 | 3.738440522 | -0.748449667 | 0.472491832 | 0.472491832 | -5.369693137 |
| 1446896_at   | -0.057878034 | 3.816284435 | -0.74843735  | 0.472498914 | 0.472498914 | -5.36970149  |
| 1428566_at   | 0.06552589   | 5.056756573 | 0.748351536  | 0.472548263 | 0.472548263 | -5.36975968  |
| 1417285_a_at | 0.064834289  | 9.971739426 | 0.748180431  | 0.472646669 | 0.472646669 | -5.369875688 |
| 1456294_at   | -0.068740198 | 5.198945665 | -0.748171788 | 0.47265164  | 0.47265164  | -5.369881547 |
| 1439715_at   | 0.075661106  | 5.081401807 | 0.748163563  | 0.472656371 | 0.472656371 | -5.369887123 |
| 1444774_at   | -0.072426931 | 5.21896712  | -0.748115014 | 0.472684295 | 0.472684295 | -5.369920034 |
| 1419299_at   | -0.049372195 | 8.01482149  | -0.748061679 | 0.472714974 | 0.472714974 | -5.369956188 |
| 1451760_s_at | -0.059732036 | 5.971336888 | -0.748024772 | 0.472736203 | 0.472736203 | -5.369981204 |
| 1419997_at   | -0.102961438 | 4.663738558 | -0.748015956 | 0.472741275 | 0.472741275 | -5.36998718  |
| 1446751_s_at | -0.067691861 | 6.229915045 | -0.748006442 | 0.472746747 | 0.472746747 | -5.369993628 |
| 1430458_at   | 0.064856964  | 4.852069739 | 0.748004093  | 0.472748099 | 0.472748099 | -5.36999522  |
| 1439258_at   | -0.080542102 | 5.017208103 | -0.74798364  | 0.472759864 | 0.472759864 | -5.370009082 |
| 1439641_at   | -0.091357875 | 4.166173453 | -0.747942383 | 0.472783597 | 0.472783597 | -5.370037045 |
| 1450498_at   | -0.084276942 | 5.766166067 | -0.747904951 | 0.472805131 | 0.472805131 | -5.370062413 |
| 1435880_at   | -0.064581338 | 10.04420846 | -0.747868002 | 0.472826387 | 0.472826387 | -5.370087453 |
| 1443208_at   | 0.087585014  | 4.41969273  | 0.747852534  | 0.472835286 | 0.472835286 | -5.370097935 |
| 1436560_at   | 0.051238181  | 7.991968909 | 0.747754102  | 0.472891917 | 0.472891917 | -5.370164636 |
| 1419903_at   | 0.105706787  | 4.590341846 | 0.747746022  | 0.472896565 | 0.472896565 | -5.37017011  |
| 1421641_at   | -0.077174889 | 4.501862273 | -0.747703143 | 0.472921237 | 0.472921237 | -5.370199164 |
| 1416318_at   | 0.09542582   | 4.794099001 | 0.747691059  | 0.472928189 | 0.472928189 | -5.370207351 |
| 1425879_at   | 0.053572411  | 5.088963997 | 0.747681503  | 0.472933688 | 0.472933688 | -5.370213826 |
| 1457873_at   | 0.063426083  | 3.725617544 | 0.747679126  | 0.472935055 | 0.472935055 | -5.370215436 |
| 1441526_at   | 0.085127367  | 7.511242479 | 0.747654216  | 0.472949389 | 0.472949389 | -5.370232313 |
| 1425819_at   | -0.078662543 | 5.328187933 | -0.747651169 | 0.472951142 | 0.472951142 | -5.370234378 |
| 1444987_at   | -0.074478904 | 6.127802362 | -0.74764434  | 0.472955071 | 0.472955071 | -5.370239004 |
| 1456233_at   | 0.049831447  | 3.097664866 | 0.747637237  | 0.472959158 | 0.472959158 | -5.370243816 |
| 1434141_at   | 0.078842818  | 8.809766442 | 0.747630835  | 0.472962842 | 0.472962842 | -5.370248154 |
| 1428231_at   | 0.052945948  | 10.62364937 | 0.747614186  | 0.472972422 | 0.472972422 | -5.370259433 |
| 1420579_s_at | 0.131269556  | 5.520687586 | 0.747608429  | 0.472975734 | 0.472975734 | -5.370263333 |
| 1437968_at   | -0.063221542 | 6.801955837 | -0.747563215 | 0.473001752 | 0.473001752 | -5.370293964 |
| 1431957_at   | 0.085694762  | 3.807266658 | 0.747551213  | 0.473008658 | 0.473008658 | -5.370302094 |
| 1427972_at   | -0.075276235 | 6.348519996 | -0.747410876 | 0.473089418 | 0.473089418 | -5.370397155 |
| 1440702_at   | 0.057582386  | 4.178131814 | 0.747397722  | 0.473096989 | 0.473096989 | -5.370406064 |

|              |              |             |              |             |             |              |
|--------------|--------------|-------------|--------------|-------------|-------------|--------------|
| 1433887_at   | -0.067666313 | 9.418815787 | -0.747397691 | 0.473097007 | 0.473097007 | -5.370406085 |
| 1422438_at   | 0.10789465   | 6.219121551 | 0.747241657  | 0.473186811 | 0.473186811 | -5.370511758 |
| 1424552_at   | 0.052677681  | 8.970452975 | 0.74723989   | 0.473187828 | 0.473187828 | -5.370512955 |
| 1422221_at   | -0.06419335  | 3.977036698 | -0.747216534 | 0.473201272 | 0.473201272 | -5.370528771 |
| 1441181_at   | 0.068944941  | 6.784398008 | 0.747188924  | 0.473217164 | 0.473217164 | -5.370547467 |
| 1459325_at   | 0.080758458  | 6.296935447 | 0.747129463  | 0.47325139  | 0.47325139  | -5.370587729 |
| 1431285_at   | -0.081264733 | 8.275117625 | -0.747060087 | 0.473291327 | 0.473291327 | -5.370634701 |
| 1451879_a_at | 0.066797033  | 4.132287924 | 0.747043538  | 0.473300853 | 0.473300853 | -5.370645905 |
| 1418019_at   | -0.060076081 | 8.379680222 | -0.746967064 | 0.473344879 | 0.473344879 | -5.370697678 |
| 1451417_at   | -0.056788189 | 6.895933304 | -0.746929682 | 0.4733664   | 0.4733664   | -5.370722984 |
| 1430115_at   | -0.053852255 | 4.615953147 | -0.746929572 | 0.473366463 | 0.473366463 | -5.370723058 |
| 1422180_a_at | -0.060945454 | 5.244558557 | -0.746874344 | 0.473398259 | 0.473398259 | -5.370760443 |
| 1451621_at   | 0.08988079   | 8.881465232 | 0.746855804  | 0.473408934 | 0.473408934 | -5.370772992 |
| 1421843_at   | 0.086501254  | 5.745739139 | 0.74684334   | 0.47341611  | 0.47341611  | -5.370781429 |
| 1435131_at   | 0.052792862  | 6.600667704 | 0.746803457  | 0.473439073 | 0.473439073 | -5.370808423 |
| 1446558_at   | 0.085964112  | 3.45001858  | 0.74679235   | 0.473445469 | 0.473445469 | -5.370815941 |
| 1451814_a_at | -0.114944172 | 6.546188294 | -0.746772327 | 0.473456998 | 0.473456998 | -5.370829493 |
| 1442030_at   | -0.066640967 | 6.801823077 | -0.746733753 | 0.473479209 | 0.473479209 | -5.37085556  |
| 1456226_x_at | 0.072633809  | 9.877839095 | 0.746680198  | 0.473510047 | 0.473510047 | -5.370891843 |
| 1454641_at   | 0.061866175  | 11.28895934 | 0.746646046  | 0.473529713 | 0.473529713 | -5.370914955 |
| 1448219_a_at | -0.056228705 | 11.67080932 | -0.746643691 | 0.473531069 | 0.473531069 | -5.370916549 |
| 1418004_a_at | 0.049944087  | 10.63825776 | 0.746599338  | 0.47355661  | 0.47355661  | -5.370946562 |
| 1434400_at   | 0.051503421  | 9.352494574 | 0.746522545  | 0.473600834 | 0.473600834 | -5.370998524 |
| 1435701_at   | 0.07236589   | 6.362769179 | 0.746474369  | 0.473628579 | 0.473628579 | -5.371031119 |
| 1424215_at   | 0.050215783  | 10.04326674 | 0.746469607  | 0.473631322 | 0.473631322 | -5.371034341 |
| 1439090_at   | -0.072487399 | 7.036704058 | -0.746454484 | 0.473640032 | 0.473640032 | -5.371044573 |
| 1427876_at   | 0.046615192  | 9.908243008 | 0.746434848  | 0.473651341 | 0.473651341 | -5.371057858 |
| 1436423_at   | -0.068101869 | 4.71725213  | -0.746431815 | 0.473653088 | 0.473653088 | -5.37105991  |
| 1437577_at   | 0.059422382  | 8.137086661 | 0.746430333  | 0.473653941 | 0.473653941 | -5.371060912 |
| 1444457_at   | 0.056521623  | 5.668241913 | 0.746382398  | 0.47368155  | 0.47368155  | -5.371093341 |
| 1420541_at   | -0.067873808 | 3.501608193 | -0.746369234 | 0.473689132 | 0.473689132 | -5.371102247 |
| 1459208_at   | -0.076842505 | 3.541014471 | -0.746315456 | 0.473720107 | 0.473720107 | -5.371138626 |
| 1418794_at   | -0.081687941 | 7.097615831 | -0.746304589 | 0.473726366 | 0.473726366 | -5.371145977 |
| 1431017_at   | 0.067283475  | 5.07833261  | 0.74628138   | 0.473739735 | 0.473739735 | -5.371161676 |
| 1460041_at   | -0.064825438 | 8.231073041 | -0.746269968 | 0.473746308 | 0.473746308 | -5.371169395 |
| 1427867_at   | -0.080194427 | 3.524003374 | -0.746187413 | 0.473793863 | 0.473793863 | -5.371225234 |
| 1434026_at   | -0.051607271 | 10.25849757 | -0.746135905 | 0.473823535 | 0.473823535 | -5.37126007  |
| 1444845_at   | 0.137023246  | 6.412173266 | 0.746093816  | 0.473847782 | 0.473847782 | -5.371288535 |
| 1435973_at   | -0.077903742 | 4.156753153 | -0.746040107 | 0.473878724 | 0.473878724 | -5.371324856 |
| 1452807_s_at | 0.072369359  | 4.082809987 | 0.746007605  | 0.473897449 | 0.473897449 | -5.371346834 |
| 1454181_at   | -0.056206685 | 4.581058069 | -0.74589634  | 0.473961556 | 0.473961556 | -5.371422067 |
| 1459025_at   | 0.06232498   | 3.768866374 | 0.745879281  | 0.473971385 | 0.473971385 | -5.371433601 |
| 1444544_at   | -0.055555114 | 4.529244105 | -0.745844787 | 0.473991261 | 0.473991261 | -5.371456922 |
| 1442564_at   | -0.059255129 | 3.57379157  | -0.745761381 | 0.474039321 | 0.474039321 | -5.371513308 |
| 1434460_at   | -0.048897893 | 5.735115076 | -0.745704518 | 0.474072089 | 0.474072089 | -5.371551747 |
| 1420455_at   | -0.06807853  | 3.517263832 | -0.745702612 | 0.474073187 | 0.474073187 | -5.371553035 |
| 1457867_at   | 0.064189877  | 4.326904429 | 0.745698541  | 0.474075533 | 0.474075533 | -5.371555787 |
| 1458543_at   | 0.12693526   | 3.798150378 | 0.74567234   | 0.474090633 | 0.474090633 | -5.371573498 |
| 1435080_x_at | -0.056467038 | 9.907883019 | -0.745600005 | 0.474132319 | 0.474132319 | -5.37162239  |
| 1435208_at   | 0.049193395  | 6.975028464 | 0.745543735  | 0.474164749 | 0.474164749 | -5.37166042  |
| 1417771_a_at | 0.050318258  | 10.53022679 | 0.745526868  | 0.474174471 | 0.474174471 | -5.37167182  |
| 1424952_at   | -0.068391275 | 5.646542187 | -0.74552537  | 0.474175334 | 0.474175334 | -5.371672832 |
| 1448479_at   | -0.060022119 | 9.123381373 | -0.745515949 | 0.474180764 | 0.474180764 | -5.371679199 |

|              |              |             |              |             |             |              |
|--------------|--------------|-------------|--------------|-------------|-------------|--------------|
| 1460166_at   | -0.058915354 | 3.136110474 | -0.745395059 | 0.474250442 | 0.474250442 | -5.371760892 |
| 1459531_at   | 0.062937067  | 3.663986331 | 0.745386941  | 0.474255122 | 0.474255122 | -5.371766378 |
| 1421946_at   | -0.075267234 | 3.904421871 | -0.745374429 | 0.474262334 | 0.474262334 | -5.371774833 |
| 1428828_at   | 0.058753167  | 8.300835408 | 0.74536589   | 0.474267256 | 0.474267256 | -5.371780603 |
| 1417791_a_at | 0.051610199  | 9.132636314 | 0.745344608  | 0.474279523 | 0.474279523 | -5.371794982 |
| 1450157_a_at | 0.091399162  | 7.336574337 | 0.745291512  | 0.474310131 | 0.474310131 | -5.371830857 |
| 1453757_at   | -0.062346836 | 3.764648332 | -0.745244676 | 0.47433713  | 0.47433713  | -5.371862501 |
| 1452763_at   | 0.087112221  | 6.99394541  | 0.745180624  | 0.474374055 | 0.474374055 | -5.371905772 |
| 1436137_at   | -0.096334821 | 7.072028894 | -0.744949179 | 0.474507497 | 0.474507497 | -5.372062105 |
| 1424441_at   | 0.064665001  | 7.631646571 | 0.744936139  | 0.474515016 | 0.474515016 | -5.372070911 |
| 1454116_a_at | 0.05208928   | 9.753585898 | 0.744930398  | 0.474518326 | 0.474518326 | -5.372074788 |
| 1416818_at   | -0.070419442 | 8.79966001  | -0.744922999 | 0.474522592 | 0.474522592 | -5.372079785 |
| 1428363_at   | 0.048856692  | 3.842198092 | 0.744868488  | 0.474554025 | 0.474554025 | -5.372116598 |
| 1432956_at   | -0.052009906 | 3.212667808 | -0.744862673 | 0.474557379 | 0.474557379 | -5.372120525 |
| 1440272_at   | 0.05772202   | 8.307165729 | 0.744839928  | 0.474570494 | 0.474570494 | -5.372135884 |
| 1423921_at   | 0.094053347  | 6.803078955 | 0.744837096  | 0.474572128 | 0.474572128 | -5.372137797 |
| 1448638_at   | -0.054010698 | 7.139949117 | -0.744814236 | 0.47458531  | 0.47458531  | -5.372153233 |
| 1438788_at   | -0.054220918 | 8.652631668 | -0.744744497 | 0.474625528 | 0.474625528 | -5.372200324 |
| 1447251_x_at | -0.065736554 | 3.962025248 | -0.744693673 | 0.474654839 | 0.474654839 | -5.372234639 |
| 1450853_at   | -0.062738706 | 9.072385435 | -0.744643217 | 0.474683939 | 0.474683939 | -5.372268704 |
| 1436981_a_at | -0.100431097 | 6.899091272 | -0.744643057 | 0.474684031 | 0.474684031 | -5.372268812 |
| 1440433_at   | 0.04785649   | 4.342646637 | 0.744623298  | 0.474695427 | 0.474695427 | -5.372282152 |
| 1432467_at   | -0.059185136 | 4.089359567 | -0.744502254 | 0.474765243 | 0.474765243 | -5.372363864 |
| 1424480_s_at | -0.068820656 | 8.753794154 | -0.744452862 | 0.474793734 | 0.474793734 | -5.372397204 |
| 1452930_at   | 0.058522889  | 3.90138811  | 0.744404968  | 0.47482136  | 0.47482136  | -5.372429529 |
| 1430886_at   | -0.068138574 | 3.430375805 | -0.744391788 | 0.474828963 | 0.474828963 | -5.372438425 |
| 1426546_at   | 0.058859105  | 6.743982766 | 0.744374625  | 0.474838864 | 0.474838864 | -5.372450008 |
| 1444207_at   | -0.096100418 | 5.166349041 | -0.7443275   | 0.474866049 | 0.474866049 | -5.372481813 |
| 1424082_at   | 0.060608102  | 7.973350358 | 0.744320853  | 0.474869884 | 0.474869884 | -5.372486299 |
| 1428766_at   | 0.047629776  | 7.57840722  | 0.744275382  | 0.474896116 | 0.474896116 | -5.372516985 |
| 1456490_at   | -0.060538791 | 4.153216285 | -0.744275005 | 0.474896334 | 0.474896334 | -5.37251724  |
| 1429672_at   | 0.069397824  | 4.368838799 | 0.744245265  | 0.474913491 | 0.474913491 | -5.372537309 |
| 1447866_x_at | -0.052961906 | 3.112728109 | -0.744198795 | 0.474940302 | 0.474940302 | -5.372568666 |
| 1451373_at   | 0.055305669  | 5.783507578 | 0.7441872    | 0.474946991 | 0.474946991 | -5.37257649  |
| 1436303_at   | 0.050198858  | 9.033010659 | 0.744165592  | 0.474959459 | 0.474959459 | -5.372591071 |
| 1444169_at   | 0.084453455  | 4.40418832  | 0.744146206  | 0.474970643 | 0.474970643 | -5.372604151 |
| 1424895_at   | 0.065000894  | 8.96501423  | 0.744092674  | 0.475001531 | 0.475001531 | -5.37264027  |
| 1415870_at   | -0.053264262 | 11.77098774 | -0.744002404 | 0.475053618 | 0.475053618 | -5.372701171 |
| 1427197_at   | -0.060098248 | 8.345215811 | -0.743991097 | 0.475060142 | 0.475060142 | -5.372708798 |
| 1459564_at   | -0.070633678 | 7.317977135 | -0.743984821 | 0.475063764 | 0.475063764 | -5.372713032 |
| 1434441_at   | -0.052650763 | 7.715796937 | -0.743953929 | 0.47508159  | 0.47508159  | -5.372733871 |
| 1438970_x_at | -0.054020846 | 3.29685594  | -0.743946836 | 0.475085683 | 0.475085683 | -5.372738657 |
| 1454712_at   | -0.063810109 | 8.389000178 | -0.743938542 | 0.475090469 | 0.475090469 | -5.372744251 |
| 1450724_at   | -0.060750665 | 9.892568408 | -0.74386506  | 0.475132874 | 0.475132874 | -5.372793818 |
| 1435491_at   | 0.055329308  | 7.197140617 | 0.743858594  | 0.475136606 | 0.475136606 | -5.372798179 |
| 1418618_at   | -0.058694049 | 3.411530528 | -0.743840834 | 0.475146855 | 0.475146855 | -5.372810158 |
| 1454041_at   | 0.058478346  | 3.650859925 | 0.743829101  | 0.475153626 | 0.475153626 | -5.372818072 |
| 1453434_at   | 0.094547079  | 5.031599854 | 0.743820461  | 0.475158613 | 0.475158613 | -5.372823899 |
| 1416893_at   | 0.058767437  | 7.766626701 | 0.743807662  | 0.475165999 | 0.475165999 | -5.372832532 |
| 1417093_a_at | 0.066469502  | 6.807835043 | 0.743753557  | 0.475197225 | 0.475197225 | -5.372869023 |
| 1429169_at   | 0.050136221  | 8.280230161 | 0.7437238    | 0.475214399 | 0.475214399 | -5.372889091 |
| 1445864_at   | -0.067239009 | 4.449616608 | -0.743714702 | 0.47521965  | 0.47521965  | -5.372895226 |
| 1434732_x_at | -0.079370854 | 6.845818978 | -0.743704888 | 0.475225314 | 0.475225314 | -5.372901845 |

|              |              |             |              |             |             |              |
|--------------|--------------|-------------|--------------|-------------|-------------|--------------|
| 1446430_at   | 0.057534525  | 4.165664242 | 0.743568774  | 0.475303879 | 0.475303879 | -5.37299363  |
| 1459758_at   | -0.054558128 | 4.073545637 | -0.743491495 | 0.475348488 | 0.475348488 | -5.373045735 |
| 1423511_at   | 0.050486959  | 10.13569973 | 0.743403065  | 0.475399537 | 0.475399537 | -5.373105353 |
| 1416573_at   | -0.082878913 | 8.178925107 | -0.743386641 | 0.475409019 | 0.475409019 | -5.373116424 |
| 1430453_a_at | -0.065284554 | 5.859432599 | -0.743331456 | 0.475440878 | 0.475440878 | -5.373153625 |
| 1418392_a_at | -0.051468716 | 4.148601291 | -0.743292045 | 0.475463632 | 0.475463632 | -5.373180191 |
| 1454364_at   | -0.051774681 | 4.110351977 | -0.743195306 | 0.475519487 | 0.475519487 | -5.373245395 |
| 1424458_at   | 0.055395026  | 7.408237909 | 0.74315895   | 0.475540479 | 0.475540479 | -5.373269897 |
| 1458317_at   | -0.056283275 | 6.061090218 | -0.743144353 | 0.475548908 | 0.475548908 | -5.373279735 |
| 1420554_a_at | 0.058617434  | 8.325432772 | 0.743110298  | 0.475568572 | 0.475568572 | -5.373302685 |
| 1417441_at   | 0.072001343  | 8.300937881 | 0.743075928  | 0.475588419 | 0.475588419 | -5.373325847 |
| 1444759_at   | -0.062380517 | 5.512532009 | -0.743038592 | 0.475609979 | 0.475609979 | -5.373351007 |
| 1428355_at   | -0.066028979 | 6.337742018 | -0.742899262 | 0.475690442 | 0.475690442 | -5.373444887 |
| 1452150_at   | 0.05030017   | 8.398662611 | 0.74287348   | 0.475705331 | 0.475705331 | -5.373462257 |
| 1427942_at   | 0.054936854  | 4.117569179 | 0.74286019   | 0.475713007 | 0.475713007 | -5.373471211 |
| 1459132_at   | 0.064692149  | 4.04990383  | 0.742770638  | 0.475764729 | 0.475764729 | -5.37353154  |
| 1435356_at   | -0.062787174 | 8.898428529 | -0.742766854 | 0.475766915 | 0.475766915 | -5.373534088 |
| 1420473_at   | 0.047215879  | 11.37870791 | 0.742761616  | 0.47576994  | 0.47576994  | -5.373537617 |
| 1458423_at   | 0.080556796  | 3.482115809 | 0.742683555  | 0.475815029 | 0.475815029 | -5.373590199 |
| 1441014_at   | -0.061644884 | 3.953598492 | -0.74265775  | 0.475829935 | 0.475829935 | -5.373607581 |
| 1448298_at   | 0.086950828  | 6.062965244 | 0.742590833  | 0.47586859  | 0.47586859  | -5.373652651 |
| 1457243_at   | -0.049722625 | 6.346453648 | -0.742582533 | 0.475873384 | 0.475873384 | -5.373658241 |
| 1432814_at   | -0.070096776 | 3.62888092  | -0.742553797 | 0.475889984 | 0.475889984 | -5.373677594 |
| 1416368_at   | -0.105491766 | 10.36919691 | -0.742547627 | 0.475893549 | 0.475893549 | -5.373681749 |
| 1435069_at   | -0.077451684 | 6.195718354 | -0.74251715  | 0.475911155 | 0.475911155 | -5.373702274 |
| 1460393_a_at | -0.071409403 | 6.612322587 | -0.742439374 | 0.475956088 | 0.475956088 | -5.373754649 |
| 1426448_at   | 0.070858414  | 8.474118977 | 0.74237376   | 0.475993996 | 0.475993996 | -5.37379883  |
| 1458522_at   | 0.068027422  | 3.886407665 | 0.742366403  | 0.475998247 | 0.475998247 | -5.373803784 |
| 1431421_x_at | -0.054304037 | 8.305845473 | -0.74232644  | 0.476021336 | 0.476021336 | -5.373830691 |
| 1440520_a_at | 0.048536759  | 5.645170455 | 0.742222046  | 0.476081657 | 0.476081657 | -5.373900974 |
| 1431232_a_at | 0.054550283  | 8.73412592  | 0.742213351  | 0.476086681 | 0.476086681 | -5.373906828 |
| 1423278_at   | -0.074922064 | 8.657760463 | -0.742162241 | 0.476116214 | 0.476116214 | -5.373941234 |
| 1457237_at   | -0.067117571 | 5.99778216  | -0.742157147 | 0.476119158 | 0.476119158 | -5.373944663 |
| 1433307_at   | -0.049520314 | 3.67787627  | -0.742109894 | 0.476146464 | 0.476146464 | -5.373976471 |
| 1442998_at   | -0.0991538   | 3.86248521  | -0.742106311 | 0.476148535 | 0.476148535 | -5.373978883 |
| 1432036_at   | -0.048431902 | 4.152762298 | -0.742103104 | 0.476150388 | 0.476150388 | -5.373981041 |
| 1450641_at   | -0.060223939 | 12.84229445 | -0.742087809 | 0.476159227 | 0.476159227 | -5.373991336 |
| 1433859_at   | 0.05356184   | 7.299928016 | 0.742086393  | 0.476160045 | 0.476160045 | -5.373992289 |
| 1429550_at   | -0.080193717 | 4.166664917 | -0.741931321 | 0.476249666 | 0.476249666 | -5.374096658 |
| 1430410_at   | -0.050866797 | 3.760187357 | -0.741913498 | 0.476259967 | 0.476259967 | -5.374108653 |
| 1459085_at   | -0.062300535 | 5.437250516 | -0.741878562 | 0.476280159 | 0.476280159 | -5.374132163 |
| 1442380_at   | 0.064790502  | 3.785211903 | 0.741837487  | 0.4763039   | 0.4763039   | -5.374159803 |
| 1452692_a_at | 0.061552685  | 10.60976445 | 0.741746959  | 0.476356228 | 0.476356228 | -5.374220716 |
| 1429001_at   | -0.096954987 | 6.70085193  | -0.741727622 | 0.476367406 | 0.476367406 | -5.374233726 |
| 1441850_x_at | 0.06409523   | 7.287675906 | 0.741673055  | 0.476398949 | 0.476398949 | -5.374270439 |
| 1436136_at   | -0.084980025 | 7.485275029 | -0.741478303 | 0.476511539 | 0.476511539 | -5.374401447 |
| 1430322_at   | -0.06641644  | 3.831085407 | -0.741441627 | 0.476532745 | 0.476532745 | -5.374426115 |
| 1457194_at   | -0.059067981 | 4.248233141 | -0.74138482  | 0.47656559  | 0.47656559  | -5.374464321 |
| 1444422_at   | 0.065196139  | 7.254015117 | 0.741384737  | 0.476565638 | 0.476565638 | -5.374464377 |
| 1449222_at   | -0.057697495 | 5.448137946 | -0.741358763 | 0.476580657 | 0.476580657 | -5.374481845 |
| 1460434_at   | 0.106161475  | 6.840409736 | 0.74129682   | 0.476616474 | 0.476616474 | -5.374523502 |
| 1455157_a_at | -0.07382006  | 9.173888258 | -0.741269655 | 0.476632182 | 0.476632182 | -5.374541769 |
| 1429814_at   | 0.128813244  | 4.46509249  | 0.741206582  | 0.476668656 | 0.476668656 | -5.374584181 |

|              |              |             |              |             |             |              |
|--------------|--------------|-------------|--------------|-------------|-------------|--------------|
| 1420581_at   | -0.069269455 | 4.195534505 | -0.741199531 | 0.476672733 | 0.476672733 | -5.374588922 |
| 1416587_a_at | -0.054830132 | 8.504107462 | -0.741172518 | 0.476688355 | 0.476688355 | -5.374607085 |
| 1443786_at   | -0.052102925 | 4.021039115 | -0.741168283 | 0.476690804 | 0.476690804 | -5.374609933 |
| 1425977_a_at | -0.050005216 | 8.384797593 | -0.741159301 | 0.476695998 | 0.476695998 | -5.374615972 |
| 1416911_a_at | -0.097173946 | 8.869768467 | -0.74110036  | 0.476730086 | 0.476730086 | -5.374655601 |
| 1439800_at   | 0.072050355  | 6.84895778  | 0.741085259  | 0.476738819 | 0.476738819 | -5.374665753 |
| 1456415_at   | 0.056303679  | 8.150685294 | 0.741040711  | 0.476764583 | 0.476764583 | -5.374695702 |
| 1445976_at   | 0.05016118   | 3.149132697 | 0.740954275  | 0.476814576 | 0.476814576 | -5.374753807 |
| 1416133_at   | -0.086845277 | 9.266966914 | -0.740938335 | 0.476823796 | 0.476823796 | -5.374764522 |
| 1454882_at   | -0.057940329 | 9.406444688 | -0.740886455 | 0.476853805 | 0.476853805 | -5.374799394 |
| 1455958_s_at | 0.049484476  | 8.858120902 | 0.740872234  | 0.47686203  | 0.47686203  | -5.374808952 |
| 1430468_at   | -0.083888413 | 3.519747486 | -0.740825988 | 0.476888781 | 0.476888781 | -5.374840035 |
| 1424948_x_at | -0.077509016 | 4.0662121   | -0.740803246 | 0.476901937 | 0.476901937 | -5.37485532  |
| 1417001_a_at | 0.064278053  | 11.38008302 | 0.740778     | 0.476916541 | 0.476916541 | -5.374872286 |
| 1432833_at   | -0.054996182 | 3.921128657 | -0.740763059 | 0.476925184 | 0.476925184 | -5.374882328 |
| 1454735_at   | -0.060140977 | 9.909095999 | -0.740716511 | 0.476952112 | 0.476952112 | -5.37491361  |
| 1455731_at   | 0.050404067  | 7.854116876 | 0.740689766  | 0.476967584 | 0.476967584 | -5.374931582 |
| 1439279_at   | 0.120924699  | 6.467948367 | 0.740657405  | 0.476986306 | 0.476986306 | -5.374953328 |
| 1429827_at   | -0.04852357  | 4.901129854 | -0.740594988 | 0.477022417 | 0.477022417 | -5.374995268 |
| 1428822_a_at | 0.045508569  | 9.160625684 | 0.740546409  | 0.477050524 | 0.477050524 | -5.375027909 |
| 1432592_at   | -0.064865107 | 4.51391511  | -0.740523528 | 0.477063762 | 0.477063762 | -5.375043281 |
| 1421226_at   | -0.052996012 | 5.642463359 | -0.740448361 | 0.477107255 | 0.477107255 | -5.375093781 |
| 1435373_at   | -0.05334321  | 5.498113475 | -0.74043909  | 0.477112619 | 0.477112619 | -5.375100009 |
| 1424130_a_at | -0.064657194 | 9.400130356 | -0.740414772 | 0.477126691 | 0.477126691 | -5.375116345 |
| 1438418_at   | -0.083516302 | 7.439810993 | -0.740375022 | 0.477149692 | 0.477149692 | -5.375143047 |
| 1451119_a_at | -0.07843913  | 10.26353319 | -0.740356845 | 0.47716021  | 0.47716021  | -5.375155257 |
| 1438420_at   | 0.066237171  | 10.6078294  | 0.740320328  | 0.477181342 | 0.477181342 | -5.375179787 |
| 1445270_at   | 0.072783566  | 5.443573883 | 0.740280317  | 0.477204496 | 0.477204496 | -5.375206661 |
| 1420837_at   | -0.091735294 | 4.204704698 | -0.740246477 | 0.47722408  | 0.47722408  | -5.37522939  |
| 1445936_at   | -0.05224956  | 4.450476082 | -0.740190413 | 0.477256525 | 0.477256525 | -5.375267043 |
| 1454929_s_at | -0.057514831 | 9.637732242 | -0.740178054 | 0.477263678 | 0.477263678 | -5.375275343 |
| 1435737_a_at | 0.051620343  | 8.490339098 | 0.740162628  | 0.477272606 | 0.477272606 | -5.375285703 |
| 1456571_at   | -0.055473912 | 5.036302329 | -0.740106212 | 0.477305258 | 0.477305258 | -5.375323589 |
| 1437970_at   | -0.047901593 | 3.484231527 | -0.740051288 | 0.477337047 | 0.477337047 | -5.375360471 |
| 1435360_at   | -0.06921131  | 7.546798131 | -0.740040952 | 0.47734303  | 0.47734303  | -5.375367411 |
| 1424837_at   | 0.045541127  | 6.947667874 | 0.74002339   | 0.477353195 | 0.477353195 | -5.375379203 |
| 1451642_at   | 0.061577878  | 8.45594655  | 0.739996951  | 0.477368499 | 0.477368499 | -5.375396956 |
| 1448820_a_at | -0.08992705  | 10.71716133 | -0.739990223 | 0.477372393 | 0.477372393 | -5.375401473 |
| 1424505_at   | -0.143213621 | 6.601883552 | -0.739981774 | 0.477377284 | 0.477377284 | -5.375407146 |
| 1441389_at   | -0.066520711 | 3.662497507 | -0.73995625  | 0.477392058 | 0.477392058 | -5.375424283 |
| 1452116_s_at | 0.064061177  | 9.734336638 | 0.739906637  | 0.477420777 | 0.477420777 | -5.375457593 |
| 1443865_at   | -0.057964682 | 3.587835915 | -0.739805309 | 0.477479435 | 0.477479435 | -5.375525617 |
| 1431095_a_at | 0.049546876  | 6.867150904 | 0.739690344  | 0.477545993 | 0.477545993 | -5.375602786 |
| 1449686_s_at | 0.106190383  | 9.13506115  | 0.739608849  | 0.477593177 | 0.477593177 | -5.375657483 |
| 1435597_at   | 0.058841466  | 8.308443377 | 0.739563434  | 0.477619473 | 0.477619473 | -5.375687961 |
| 1459555_at   | -0.074068413 | 5.24649169  | -0.739382725 | 0.477724115 | 0.477724115 | -5.375809221 |
| 1436208_at   | 0.048312333  | 7.31826387  | 0.739345265  | 0.477745809 | 0.477745809 | -5.375834355 |
| 1422830_s_at | -0.082298694 | 4.567471876 | -0.739339442 | 0.477749181 | 0.477749181 | -5.375838262 |
| 1448919_at   | -0.067429781 | 8.674016868 | -0.73930193  | 0.477770906 | 0.477770906 | -5.375863428 |
| 1431044_at   | 0.137951755  | 5.38520119  | 0.739297316  | 0.477773578 | 0.477773578 | -5.375866524 |
| 1434213_x_at | 0.048805275  | 9.11450712  | 0.739283646  | 0.477781495 | 0.477781495 | -5.375875695 |
| 1431459_at   | -0.063042929 | 3.941773704 | -0.739274339 | 0.477786885 | 0.477786885 | -5.375881938 |
| 1453069_at   | -0.069427529 | 4.599826816 | -0.739210445 | 0.47782389  | 0.47782389  | -5.375924801 |

|              |              |             |              |             |             |              |
|--------------|--------------|-------------|--------------|-------------|-------------|--------------|
| 1447626_x_at | 0.049158775  | 3.337768377 | 0.739084074  | 0.477897085 | 0.477897085 | -5.376009566 |
| 1444105_at   | -0.075873859 | 3.581823772 | -0.739065975 | 0.477907569 | 0.477907569 | -5.376021705 |
| 1441464_at   | 0.064814772  | 3.770760863 | 0.739061744  | 0.47791002  | 0.47791002  | -5.376024543 |
| 1428999_at   | -0.046286204 | 6.665096316 | -0.73902998  | 0.477928419 | 0.477928419 | -5.376045846 |
| 1454585_at   | -0.085206698 | 3.86417901  | -0.739015048 | 0.477937069 | 0.477937069 | -5.376055861 |
| 1428255_at   | 0.046461587  | 9.835612052 | 0.738973981  | 0.477960858 | 0.477960858 | -5.376083402 |
| 1430784_a_at | 0.057745574  | 5.124970299 | 0.738829842  | 0.478044361 | 0.478044361 | -5.376180058 |
| 1442570_at   | -0.05681858  | 3.967550049 | -0.738826956 | 0.478046033 | 0.478046033 | -5.376181993 |
| 1444291_at   | -0.048583887 | 4.710387169 | -0.738695277 | 0.478122326 | 0.478122326 | -5.376270278 |
| 1451294_s_at | 0.060695726  | 12.06194872 | 0.738694036  | 0.478123045 | 0.478123045 | -5.37627111  |
| 1439045_x_at | 0.056632694  | 3.362644702 | 0.738673288  | 0.478135066 | 0.478135066 | -5.376285019 |
| 1421031_a_at | -0.053000683 | 7.323193569 | -0.73863367  | 0.478158022 | 0.478158022 | -5.376311578 |
| 1420610_at   | 0.066825901  | 6.699080513 | 0.738541954  | 0.478211168 | 0.478211168 | -5.376373057 |
| 1420472_at   | 0.050658815  | 9.034468629 | 0.738518508  | 0.478224754 | 0.478224754 | -5.376388772 |
| 1427554_at   | -0.093465642 | 5.76920065  | -0.738382967 | 0.478303304 | 0.478303304 | -5.376479613 |
| 1445447_at   | -0.066138268 | 3.314975994 | -0.738328385 | 0.478334937 | 0.478334937 | -5.37651619  |
| 1440125_at   | 0.17599281   | 4.673805582 | 0.738302037  | 0.478350208 | 0.478350208 | -5.376533846 |
| 1443978_at   | 0.063702889  | 7.072755902 | 0.738228205  | 0.478393001 | 0.478393001 | -5.376583318 |
| 1440766_at   | 0.055323202  | 4.691209017 | 0.738223596  | 0.478395673 | 0.478395673 | -5.376586407 |
| 1441777_at   | -0.053582064 | 6.264036287 | -0.738214622 | 0.478400875 | 0.478400875 | -5.376592419 |
| 1428186_at   | 0.063373435  | 7.667096374 | 0.738185843  | 0.478417556 | 0.478417556 | -5.376611701 |
| 1428022_at   | 0.075282335  | 4.039615983 | 0.738178663  | 0.478421718 | 0.478421718 | -5.376616512 |
| 1439010_at   | -0.060450333 | 8.82286566  | -0.738061611 | 0.478489569 | 0.478489569 | -5.376694931 |
| 1429439_at   | 0.062371785  | 3.550350964 | 0.738048881  | 0.478496949 | 0.478496949 | -5.376703458 |
| 1456619_at   | 0.052664868  | 3.364627222 | 0.738036405  | 0.478504181 | 0.478504181 | -5.376711816 |
| 1430101_at   | 0.052457879  | 3.639047872 | 0.737864747  | 0.478603699 | 0.478603699 | -5.376826795 |
| 1424928_at   | 0.050132881  | 7.945236354 | 0.737808468  | 0.478636329 | 0.478636329 | -5.376864486 |
| 1428570_at   | 0.08294359   | 6.971100782 | 0.737787625  | 0.478648415 | 0.478648415 | -5.376878445 |
| 1440430_at   | 0.079192393  | 5.512228196 | 0.737787048  | 0.478648749 | 0.478648749 | -5.376878831 |
| 1430003_at   | 0.075045246  | 5.731778341 | 0.737783417  | 0.478650855 | 0.478650855 | -5.376881263 |
| 1447197_at   | -0.050904891 | 3.391584581 | -0.737777191 | 0.478654465 | 0.478654465 | -5.376885432 |
| 1442614_at   | 0.06570364   | 4.084762153 | 0.737706221  | 0.478695616 | 0.478695616 | -5.376932957 |
| 1427341_at   | -0.072235775 | 6.422110112 | -0.737694586 | 0.478702362 | 0.478702362 | -5.376940748 |
| 1451069_at   | -0.06830585  | 7.490918882 | -0.737659424 | 0.478722752 | 0.478722752 | -5.376964292 |
| 1433681_x_at | -0.070973837 | 4.874812047 | -0.737608533 | 0.478752263 | 0.478752263 | -5.376998367 |
| 1432049_at   | -0.064641698 | 6.685481084 | -0.737600464 | 0.478756942 | 0.478756942 | -5.377003769 |
| 1437917_at   | 0.126334532  | 6.12055356  | 0.737589804  | 0.478763124 | 0.478763124 | -5.377010907 |
| 1426985_s_at | 0.069358126  | 9.338027012 | 0.737583503  | 0.478766777 | 0.478766777 | -5.377015125 |
| 1424319_at   | 0.063063639  | 7.875468115 | 0.737394671  | 0.478876291 | 0.478876291 | -5.377141538 |
| 1442047_at   | 0.092336936  | 5.081318259 | 0.737379552  | 0.47888506  | 0.47888506  | -5.377151658 |
| 1448447_at   | -0.050320006 | 10.57683123 | -0.73729867  | 0.478931973 | 0.478931973 | -5.377205794 |
| 1433777_at   | -0.056229705 | 7.184174512 | -0.737268554 | 0.478949442 | 0.478949442 | -5.377225951 |
| 1453941_at   | 0.060070462  | 4.30065055  | 0.737266982  | 0.478950354 | 0.478950354 | -5.377227003 |
| 1430017_at   | -0.062552863 | 5.937416828 | -0.737264891 | 0.478951567 | 0.478951567 | -5.377228402 |
| 1448345_at   | -0.070693766 | 8.789794345 | -0.737226997 | 0.478973548 | 0.478973548 | -5.377253763 |
| 1431662_at   | -0.05845313  | 4.348716073 | -0.737225692 | 0.478974304 | 0.478974304 | -5.377254636 |
| 1458687_at   | -0.071425191 | 4.357095497 | -0.737218002 | 0.478978765 | 0.478978765 | -5.377259782 |
| 1444116_at   | 0.109435573  | 5.378749729 | 0.737184122  | 0.478998418 | 0.478998418 | -5.377282455 |
| 1447585_s_at | -0.056683749 | 9.17588679  | -0.737166017 | 0.479008921 | 0.479008921 | -5.377294572 |
| 1416954_at   | -0.061936533 | 8.259421961 | -0.737157875 | 0.479013644 | 0.479013644 | -5.37730002  |
| 1443056_at   | 0.062082343  | 9.632556479 | 0.737106326  | 0.479043548 | 0.479043548 | -5.377334515 |
| 1458259_x_at | 0.067472216  | 2.977460708 | 0.737062749  | 0.479068829 | 0.479068829 | -5.377363673 |
| 1418255_s_at | -0.049552009 | 8.136662375 | -0.737045429 | 0.479078877 | 0.479078877 | -5.377375261 |

|              |              |             |              |             |             |              |
|--------------|--------------|-------------|--------------|-------------|-------------|--------------|
| 1425828_at   | -0.082621927 | 4.953546279 | -0.736926977 | 0.4791476   | 0.4791476   | -5.377454511 |
| 1437604_x_at | 0.053793783  | 8.588260479 | 0.736887239  | 0.479170656 | 0.479170656 | -5.377481095 |
| 1443109_at   | 0.090454724  | 6.609040682 | 0.736863505  | 0.479184427 | 0.479184427 | -5.377496972 |
| 1427195_at   | -0.051073325 | 8.415174256 | -0.736833536 | 0.479201817 | 0.479201817 | -5.37751702  |
| 1444954_at   | -0.056323435 | 4.037568751 | -0.736824002 | 0.479207349 | 0.479207349 | -5.377523398 |
| 1450405_at   | -0.083483664 | 8.29119788  | -0.73674816  | 0.479251357 | 0.479251357 | -5.377574127 |
| 1431110_at   | 0.087131207  | 4.656428137 | 0.736745985  | 0.47925262  | 0.47925262  | -5.377575582 |
| 1450802_at   | -0.069417973 | 3.946336357 | -0.736697019 | 0.479281034 | 0.479281034 | -5.377608332 |
| 1438426_at   | -0.111648096 | 7.115082046 | -0.736629977 | 0.47931994  | 0.47931994  | -5.377653169 |
| 1425190_a_at | -0.059494013 | 7.871395707 | -0.736598835 | 0.479338013 | 0.479338013 | -5.377673996 |
| 1445582_at   | -0.079929587 | 4.936101142 | -0.736592193 | 0.479341868 | 0.479341868 | -5.377678437 |
| 1439559_at   | -0.05754212  | 3.592604283 | -0.73655399  | 0.479364039 | 0.479364039 | -5.377703984 |
| 1427016_at   | 0.054684112  | 8.252206977 | 0.736502218  | 0.479394087 | 0.479394087 | -5.377738603 |
| 1456810_at   | 0.069760266  | 6.477524831 | 0.736486038  | 0.479403478 | 0.479403478 | -5.377749422 |
| 1446545_at   | -0.053075283 | 3.360204929 | -0.736470522 | 0.479412483 | 0.479412483 | -5.377759796 |
| 1423268_at   | 0.087313252  | 5.724076115 | 0.736458391  | 0.479419525 | 0.479419525 | -5.377767908 |
| 1417023_a_at | 0.078833532  | 6.562647015 | 0.736433102  | 0.479434202 | 0.479434202 | -5.377784816 |
| 1447557_at   | 0.080201827  | 4.700080105 | 0.736421285  | 0.479441062 | 0.479441062 | -5.377792717 |
| 1427296_at   | -0.04848371  | 11.44344689 | -0.736401475 | 0.47945256  | 0.47945256  | -5.377805962 |
| 1460369_at   | 0.064988655  | 6.696419599 | 0.736389532  | 0.479459492 | 0.479459492 | -5.377813947 |
| 1456764_at   | 0.06006868   | 3.73707062  | 0.736281656  | 0.479522111 | 0.479522111 | -5.377886065 |
| 1438987_at   | -0.079115855 | 6.405595786 | -0.736281114 | 0.479522425 | 0.479522425 | -5.377886427 |
| 1436654_at   | -0.083078483 | 6.121023276 | -0.736281014 | 0.479522483 | 0.479522483 | -5.377886494 |
| 1432959_at   | -0.063924857 | 5.286875574 | -0.73627758  | 0.479524477 | 0.479524477 | -5.377888789 |
| 1433645_at   | -0.047903632 | 10.69700911 | -0.736247428 | 0.47954198  | 0.47954198  | -5.377908945 |
| 1457311_at   | 0.060057852  | 4.782965625 | 0.736224992  | 0.479555005 | 0.479555005 | -5.377923943 |
| 1450316_at   | 0.056709059  | 4.018960081 | 0.736221242  | 0.479557182 | 0.479557182 | -5.377926449 |
| 1423526_at   | -0.063834403 | 4.484391833 | -0.736205594 | 0.479566266 | 0.479566266 | -5.377936909 |
| 1445994_at   | -0.068882529 | 3.495884308 | -0.73612898  | 0.479610743 | 0.479610743 | -5.377988117 |
| 1427914_a_at | 0.049998622  | 10.81120983 | 0.736106266  | 0.47962393  | 0.47962393  | -5.378003298 |
| 1419769_at   | 0.053684718  | 3.484852498 | 0.736068482  | 0.479645867 | 0.479645867 | -5.37802855  |
| 1458964_at   | -0.067683301 | 3.538372702 | -0.736020162 | 0.479673921 | 0.479673921 | -5.378060842 |
| 1423760_at   | -0.065629804 | 9.600904525 | -0.736011422 | 0.479678996 | 0.479678996 | -5.378066683 |
| 1458464_at   | 0.07915222   | 5.365424331 | 0.735958567  | 0.479709685 | 0.479709685 | -5.378102003 |
| 1422623_x_at | -0.046969284 | 13.94691051 | -0.735954986 | 0.479711764 | 0.479711764 | -5.378104396 |
| 1458643_at   | 0.055944271  | 3.875011306 | 0.735588011  | 0.479924874 | 0.479924874 | -5.378349565 |
| 1438669_at   | 0.04641937   | 8.542359044 | 0.735555786  | 0.47994359  | 0.47994359  | -5.378371089 |
| 1422141_s_at | 0.098496674  | 3.340129269 | 0.735544316  | 0.479950252 | 0.479950252 | -5.378378749 |
| 1429762_a_at | -0.093597783 | 7.43217774  | -0.735539902 | 0.479952816 | 0.479952816 | -5.378381697 |
| 1434155_a_at | 0.099116265  | 8.464858866 | 0.735525023  | 0.479961458 | 0.479961458 | -5.378391635 |
| 1453805_at   | -0.049573712 | 4.597000592 | -0.735516585 | 0.479966359 | 0.479966359 | -5.378397271 |
| 1432376_at   | 0.070441378  | 3.452509349 | 0.735508827  | 0.479970865 | 0.479970865 | -5.378402452 |
| 1449854_at   | 0.064871799  | 6.196868629 | 0.735467488  | 0.479994877 | 0.479994877 | -5.37843006  |
| 1456369_at   | 0.119840149  | 4.54897903  | 0.735466457  | 0.479995476 | 0.479995476 | -5.378430749 |
| 1454908_x_at | 0.050276865  | 8.536062185 | 0.735460075  | 0.479999183 | 0.479999183 | -5.378435011 |
| 1441360_at   | 0.060503251  | 6.827686412 | 0.735451802  | 0.480003988 | 0.480003988 | -5.378440536 |
| 1417117_at   | -0.060317    | 6.535322734 | -0.735312658 | 0.480084816 | 0.480084816 | -5.378533452 |
| 1454724_x_at | 0.051742384  | 9.898272805 | 0.735241878  | 0.480125935 | 0.480125935 | -5.378580711 |
| 1445327_at   | -0.047115727 | 4.362946293 | -0.735212003 | 0.480143291 | 0.480143291 | -5.378600656 |
| 1444138_at   | 0.05379496   | 3.479011065 | 0.73516308   | 0.480171715 | 0.480171715 | -5.378633318 |
| 1445153_at   | 0.093084663  | 5.427256166 | 0.734990131  | 0.480272204 | 0.480272204 | -5.378748766 |
| 1455727_at   | 0.050163779  | 8.601641532 | 0.734970168  | 0.480283804 | 0.480283804 | -5.378762091 |
| 1433408_a_at | 0.052860284  | 7.597839202 | 0.734935411  | 0.480304    | 0.480304    | -5.378785288 |

|              |              |             |              |             |             |              |
|--------------|--------------|-------------|--------------|-------------|-------------|--------------|
| 1450217_at   | 0.056942095  | 4.820255968 | 0.734905114  | 0.480321606 | 0.480321606 | -5.378805508 |
| 1435925_at   | 0.085993172  | 7.627706594 | 0.73489656   | 0.480326576 | 0.480326576 | -5.378811217 |
| 1455488_at   | 0.06986145   | 7.294957479 | 0.734795168  | 0.480385499 | 0.480385499 | -5.378878881 |
| 1438552_x_at | -0.047193655 | 6.435807805 | -0.734738221 | 0.480418595 | 0.480418595 | -5.37891688  |
| 1425547_a_at | 0.065688893  | 5.996756453 | 0.734712493  | 0.480433548 | 0.480433548 | -5.378934047 |
| 1435250_at   | 0.057897152  | 8.876539567 | 0.734643353  | 0.480473733 | 0.480473733 | -5.378980178 |
| 1436271_at   | -0.052179162 | 3.615427351 | -0.734594284 | 0.480502253 | 0.480502253 | -5.379012914 |
| 1440662_at   | -0.099983849 | 6.396157176 | -0.734574466 | 0.480513772 | 0.480513772 | -5.379026136 |
| 1457610_at   | -0.067687008 | 6.135182423 | -0.73454434  | 0.480531284 | 0.480531284 | -5.379046233 |
| 1416914_s_at | 0.061116819  | 9.339364117 | 0.734526015  | 0.480541935 | 0.480541935 | -5.379058458 |
| 1456998_at   | -0.05480675  | 3.178325402 | -0.734508406 | 0.480552171 | 0.480552171 | -5.379070204 |
| 1447127_at   | 0.067183803  | 3.488131376 | 0.734500592  | 0.480556713 | 0.480556713 | -5.379075417 |
| 1428039_at   | -0.065073793 | 3.454375106 | -0.734414948 | 0.480606499 | 0.480606499 | -5.379132545 |
| 1436184_at   | -0.050524765 | 9.249480495 | -0.734380789 | 0.480626356 | 0.480626356 | -5.379155328 |
| 1459345_at   | -0.050593199 | 5.17095679  | -0.734365562 | 0.480635209 | 0.480635209 | -5.379165484 |
| 1431159_at   | 0.059268675  | 3.908066398 | 0.73429762   | 0.480674707 | 0.480674707 | -5.379210796 |
| 1448823_at   | -0.097134589 | 10.32223883 | -0.734290613 | 0.480678781 | 0.480678781 | -5.379215469 |
| 1432259_s_at | -0.076522635 | 3.868857499 | -0.734257675 | 0.480697931 | 0.480697931 | -5.379237435 |
| 1426241_a_at | -0.088893868 | 7.698294166 | -0.734255294 | 0.480699315 | 0.480699315 | -5.379239023 |
| 1415930_a_at | 0.056024502  | 10.92509859 | 0.734157894  | 0.480755946 | 0.480755946 | -5.379303973 |
| 1442404_at   | 0.057332043  | 5.708964831 | 0.734132681  | 0.480770606 | 0.480770606 | -5.379320784 |
| 1431709_at   | 0.055151595  | 5.170374894 | 0.734088866  | 0.480796082 | 0.480796082 | -5.379349998 |
| 1418418_a_at | 0.055314433  | 3.365098552 | 0.734081686  | 0.480800257 | 0.480800257 | -5.379354785 |
| 1445058_at   | -0.092910405 | 3.795650837 | -0.734065318 | 0.480809775 | 0.480809775 | -5.379365698 |
| 1418237_s_at | 0.076577304  | 8.91172435  | 0.734044534  | 0.480821861 | 0.480821861 | -5.379379555 |
| 1449224_at   | -0.048303313 | 4.393143525 | -0.734040368 | 0.480824283 | 0.480824283 | -5.379382333 |
| 1452093_at   | 0.055974897  | 8.672374045 | 0.734014033  | 0.480839597 | 0.480839597 | -5.37939989  |
| 1415873_a_at | -0.081115017 | 9.75994187  | -0.734009492 | 0.480842237 | 0.480842237 | -5.379402917 |
| 1460292_a_at | 0.049891187  | 9.814212808 | 0.733934352  | 0.480885933 | 0.480885933 | -5.379453009 |
| 1452186_at   | -0.047533804 | 11.2672116  | -0.733896662 | 0.480907852 | 0.480907852 | -5.379478133 |
| 1425438_at   | -0.081419507 | 3.579123699 | -0.733871124 | 0.480922704 | 0.480922704 | -5.379495156 |
| 1425857_at   | -0.053343626 | 7.277516666 | -0.733841726 | 0.480939801 | 0.480939801 | -5.379514752 |
| 1448544_at   | -0.062601297 | 5.681212754 | -0.733797549 | 0.480965494 | 0.480965494 | -5.379544197 |
| 1427173_a_at | -0.057253463 | 9.51014306  | -0.733744384 | 0.480996416 | 0.480996416 | -5.379579631 |
| 1425095_at   | 0.075553912  | 6.858233746 | 0.733730728  | 0.481004358 | 0.481004358 | -5.379588732 |
| 1427444_at   | -0.077327967 | 4.46288715  | -0.733576136 | 0.481094279 | 0.481094279 | -5.37969175  |
| 1426563_at   | -0.061823012 | 5.572469123 | -0.733524968 | 0.481124044 | 0.481124044 | -5.379725844 |
| 1447397_at   | 0.067740102  | 4.834489186 | 0.733515079  | 0.481129797 | 0.481129797 | -5.379732433 |
| 1446698_at   | 0.057289915  | 6.911293867 | 0.733512659  | 0.481131205 | 0.481131205 | -5.379734046 |
| 1416754_at   | 0.065233649  | 6.409313799 | 0.733450127  | 0.481167582 | 0.481167582 | -5.379775708 |
| 1418625_s_at | -0.049089834 | 13.5565721  | -0.733437358 | 0.481175011 | 0.481175011 | -5.379784215 |
| 1453025_at   | 0.076047567  | 4.836412796 | 0.733419798  | 0.481185226 | 0.481185226 | -5.379795913 |
| 1446709_at   | 0.07147185   | 3.896425291 | 0.733414693  | 0.481188197 | 0.481188197 | -5.379799314 |
| 1434690_at   | 0.046839215  | 8.951067782 | 0.733362917  | 0.481218319 | 0.481218319 | -5.379833807 |
| 1433132_at   | -0.068443126 | 3.544612014 | -0.733358706 | 0.481220769 | 0.481220769 | -5.379836612 |
| 1422203_at   | 0.07344408   | 4.410692974 | 0.733301041  | 0.481254319 | 0.481254319 | -5.379875025 |
| 1423237_at   | -0.067316198 | 9.570396982 | -0.733262963 | 0.481276474 | 0.481276474 | -5.379900388 |
| 1419947_at   | -0.056898514 | 7.656868727 | -0.733150459 | 0.481341937 | 0.481341937 | -5.37997532  |
| 1448427_at   | -0.049712818 | 10.1097015  | -0.733127401 | 0.481355354 | 0.481355354 | -5.379990676 |
| 1427010_s_at | -0.076005886 | 6.442143505 | -0.733004716 | 0.481426748 | 0.481426748 | -5.380072375 |
| 1421382_at   | 0.101511097  | 4.851334976 | 0.732985071  | 0.48143818  | 0.48143818  | -5.380085456 |
| 1453030_at   | 0.082656594  | 8.247274418 | 0.732957472  | 0.481454242 | 0.481454242 | -5.380103832 |
| 1423763_x_at | 0.043870625  | 13.85719137 | 0.73295526   | 0.48145553  | 0.48145553  | -5.380105306 |



|              |              |             |              |             |             |              |
|--------------|--------------|-------------|--------------|-------------|-------------|--------------|
| 1431248_at   | 0.070653924  | 5.577178546 | 0.732955098  | 0.481455624 | 0.481455624 | -5.380105413 |
| 1438461_at   | 0.054282374  | 3.137033835 | 0.732950853  | 0.481458094 | 0.481458094 | -5.38010824  |
| 1437149_at   | 0.045824266  | 10.60007532 | 0.732949739  | 0.481458743 | 0.481458743 | -5.380108981 |
| 1449786_at   | -0.049492639 | 3.945621341 | -0.732939119 | 0.481464923 | 0.481464923 | -5.380116052 |
| 1453675_at   | -0.071076625 | 4.368364886 | -0.732893354 | 0.481491558 | 0.481491558 | -5.380146523 |
| 1440491_at   | -0.209463045 | 6.623409607 | -0.732776147 | 0.481559776 | 0.481559776 | -5.380224552 |
| 1452263_at   | 0.054224467  | 3.67987141  | 0.732666285  | 0.481623725 | 0.481623725 | -5.380297682 |
| 1460057_at   | -0.072600153 | 5.12946857  | -0.732634893 | 0.481641999 | 0.481641999 | -5.380318576 |
| 1421627_at   | -0.04978146  | 4.183030103 | -0.732567916 | 0.481680989 | 0.481680989 | -5.380363153 |
| 1459317_at   | 0.06672206   | 4.931017865 | 0.732482815  | 0.481730532 | 0.481730532 | -5.380419787 |
| 1436880_at   | -0.105015019 | 4.399204426 | -0.732479642 | 0.481732379 | 0.481732379 | -5.380421898 |
| 1426743_at   | -0.043301393 | 9.59689704  | -0.732340697 | 0.481813276 | 0.481813276 | -5.380514353 |
| 1444326_at   | -0.072953715 | 6.768117205 | -0.732331815 | 0.481818447 | 0.481818447 | -5.380520262 |
| 1443233_at   | -0.074170696 | 7.354180284 | -0.732320655 | 0.481824946 | 0.481824946 | -5.380527687 |
| 1422681_at   | 0.055298952  | 8.293626465 | 0.7322883    | 0.481843785 | 0.481843785 | -5.380549214 |
| 1434442_at   | -0.083657164 | 7.004616145 | -0.732265861 | 0.481856851 | 0.481856851 | -5.380564142 |
| 1446080_at   | 0.073548644  | 5.988608799 | 0.732195854  | 0.481897616 | 0.481897616 | -5.380610715 |
| 1433735_a_at | -0.121153954 | 9.036453041 | -0.732039539 | 0.481988646 | 0.481988646 | -5.380714691 |
| 1450136_at   | -0.06712291  | 4.221625593 | -0.732003319 | 0.482009741 | 0.482009741 | -5.38073878  |
| 1421605_a_at | -0.065496509 | 4.838189965 | -0.731984747 | 0.482020557 | 0.482020557 | -5.380751132 |
| 1459105_at   | 0.063504802  | 5.576323154 | 0.731950303  | 0.482040618 | 0.482040618 | -5.380774039 |
| 1446497_at   | -0.073276159 | 7.594595358 | -0.73190197  | 0.482068769 | 0.482068769 | -5.380806181 |
| 1445301_at   | 0.054189127  | 4.242309037 | 0.731869045  | 0.482087946 | 0.482087946 | -5.380828075 |
| 1424213_at   | -0.051166696 | 8.02139358  | -0.731858976 | 0.482093811 | 0.482093811 | -5.380834771 |
| 1430750_at   | 0.050896421  | 4.98781555  | 0.731833031  | 0.482108923 | 0.482108923 | -5.380852023 |
| 1416603_at   | 0.053212303  | 11.90231424 | 0.731738121  | 0.482164208 | 0.482164208 | -5.380915129 |
| 1445323_at   | 0.057110893  | 4.082492368 | 0.731737781  | 0.482164407 | 0.482164407 | -5.380915355 |
| 1448108_at   | 0.066834796  | 10.6457265  | 0.731647607  | 0.482216936 | 0.482216936 | -5.380975305 |
| 1427271_at   | -0.052226697 | 6.733809835 | -0.731633124 | 0.482225374 | 0.482225374 | -5.380984934 |
| 1433430_s_at | 0.048866507  | 9.293586077 | 0.73140462   | 0.482358505 | 0.482358505 | -5.381136818 |
| 1454343_at   | 0.05488115   | 5.888981055 | 0.731381898  | 0.482371744 | 0.482371744 | -5.381151918 |
| 1421932_at   | -0.094882918 | 4.888163353 | -0.731353877 | 0.482388072 | 0.482388072 | -5.38117054  |
| 1420358_at   | -0.066647064 | 3.715584537 | -0.731284389 | 0.482428563 | 0.482428563 | -5.381216717 |
| 1450020_at   | -0.068966336 | 7.663538768 | -0.731278637 | 0.482431915 | 0.482431915 | -5.381220539 |
| 1426991_at   | -0.057849338 | 7.101422903 | -0.731231149 | 0.482459588 | 0.482459588 | -5.381252094 |
| 1453918_at   | -0.061749624 | 3.41737259  | -0.73106524  | 0.482556277 | 0.482556277 | -5.381362323 |
| 1425092_at   | 0.113633446  | 6.571561797 | 0.731060232  | 0.482559196 | 0.482559196 | -5.38136565  |
| 1438102_at   | -0.046948719 | 4.850888973 | -0.73104953  | 0.482565433 | 0.482565433 | -5.38137276  |
| 1439356_at   | -0.047606484 | 4.864914271 | -0.731038368 | 0.482571939 | 0.482571939 | -5.381380175 |
| 1426891_at   | 0.068881867  | 7.753747983 | 0.730965033  | 0.482614682 | 0.482614682 | -5.38142889  |
| 1447642_x_at | -0.061227693 | 3.660014115 | -0.730936739 | 0.482631174 | 0.482631174 | -5.381447683 |
| 1421848_at   | -0.062520949 | 6.104956296 | -0.730912742 | 0.482645161 | 0.482645161 | -5.381463622 |
| 1457768_at   | 0.053828325  | 5.42836789  | 0.730839731  | 0.48268772  | 0.48268772  | -5.381512115 |
| 1440226_at   | 0.050022408  | 8.690424833 | 0.730835509  | 0.482690181 | 0.482690181 | -5.381514919 |
| 1448665_at   | 0.073617506  | 7.266173714 | 0.730820336  | 0.482699026 | 0.482699026 | -5.381524996 |
| 1423382_a_at | 0.05117805   | 10.57730507 | 0.73081118   | 0.482704363 | 0.482704363 | -5.381531077 |
| 1444120_at   | -0.088081364 | 5.136332075 | -0.730780935 | 0.482721994 | 0.482721994 | -5.381551162 |
| 1438256_at   | -0.071677887 | 6.021689832 | -0.730780207 | 0.482722419 | 0.482722419 | -5.381551646 |
| 1422914_at   | -0.066102506 | 5.060319243 | -0.730768247 | 0.482729391 | 0.482729391 | -5.381559589 |
| 1442213_at   | 0.108646462  | 6.343643153 | 0.730757385  | 0.482735723 | 0.482735723 | -5.381566802 |
| 1437414_at   | 0.056649299  | 8.207443167 | 0.730748362  | 0.482740983 | 0.482740983 | -5.381572794 |
| 1431906_at   | -0.057597615 | 3.821347367 | -0.730667891 | 0.482787896 | 0.482787896 | -5.38162623  |
| 1421277_at   | 0.06234898   | 4.054926782 | 0.730460943  | 0.482908556 | 0.482908556 | -5.381763628 |

|              |              |             |              |             |             |              |
|--------------|--------------|-------------|--------------|-------------|-------------|--------------|
| 1432077_at   | 0.101846274  | 3.279731596 | 0.730415255  | 0.482935196 | 0.482935196 | -5.381793957 |
| 1417129_a_at | -0.061029153 | 10.12827338 | -0.730288434 | 0.483009151 | 0.483009151 | -5.381878136 |
| 1455034_at   | -0.087656179 | 6.773690121 | -0.730262719 | 0.483024147 | 0.483024147 | -5.381895203 |
| 1426674_at   | -0.058905107 | 9.980564918 | -0.730257595 | 0.483027135 | 0.483027135 | -5.381898604 |
| 1438071_at   | 0.051364242  | 7.413530915 | 0.730245534  | 0.483034169 | 0.483034169 | -5.381906608 |
| 1422781_at   | 0.070913632  | 3.61676106  | 0.730195671  | 0.483063249 | 0.483063249 | -5.381939701 |
| 1456922_at   | -0.060678072 | 5.992460078 | -0.730175466 | 0.483075033 | 0.483075033 | -5.381953108 |
| 1455349_at   | 0.055262851  | 8.871127108 | 0.730170306  | 0.483078043 | 0.483078043 | -5.381956533 |
| 1448382_at   | 0.049545456  | 5.228428805 | 0.730137519  | 0.483097165 | 0.483097165 | -5.38197829  |
| 1432810_at   | -0.045035551 | 4.936731451 | -0.730099042 | 0.483119606 | 0.483119606 | -5.382003823 |
| 1454971_x_at | 0.060931966  | 12.86260523 | 0.730083659  | 0.483128579 | 0.483128579 | -5.38201403  |
| 1427834_at   | -0.061058551 | 3.581732536 | -0.730075247 | 0.483133485 | 0.483133485 | -5.382019612 |
| 1422403_at   | -0.083188009 | 5.619608526 | -0.730050116 | 0.483148143 | 0.483148143 | -5.382036287 |
| 1456037_x_at | -0.070327865 | 9.568841408 | -0.730018356 | 0.483166668 | 0.483166668 | -5.38205736  |
| 1445296_at   | 0.067249353  | 3.521269162 | 0.729998045  | 0.483178515 | 0.483178515 | -5.382070836 |
| 1445104_at   | -0.068085141 | 3.798407068 | -0.729943784 | 0.483210166 | 0.483210166 | -5.382106836 |
| 1456562_x_at | 0.04906015   | 5.383392982 | 0.729904116  | 0.483233306 | 0.483233306 | -5.382133152 |
| 1430248_at   | 0.060980109  | 3.754844002 | 0.72986004   | 0.483259017 | 0.483259017 | -5.382162391 |
| 1420867_at   | -0.05318088  | 9.905287798 | -0.729684171 | 0.483361619 | 0.483361619 | -5.382279044 |
| 1448434_at   | 0.079514743  | 8.635817316 | 0.729667519  | 0.483371334 | 0.483371334 | -5.382290088 |
| 1449295_at   | 0.04819249   | 7.419309194 | 0.729593661  | 0.483414428 | 0.483414428 | -5.382339069 |
| 1436851_at   | -0.08829332  | 6.735382881 | -0.729569892 | 0.483428297 | 0.483428297 | -5.382354832 |
| 1428448_a_at | 0.055811696  | 9.161233055 | 0.729545758  | 0.483442379 | 0.483442379 | -5.382370836 |
| 1451521_x_at | 0.057658999  | 11.57105912 | 0.729534582  | 0.4834489   | 0.4834489   | -5.382378246 |
| 1421740_at   | 0.091881119  | 4.003385469 | 0.729502499  | 0.48346762  | 0.48346762  | -5.38239952  |
| 1421207_at   | 0.069786861  | 4.668205586 | 0.729484527  | 0.483478108 | 0.483478108 | -5.382411438 |
| 1427518_at   | 0.074665847  | 6.82571005  | 0.729468348  | 0.483487549 | 0.483487549 | -5.382422165 |
| 1439455_x_at | 0.090679531  | 10.4681227  | 0.729459769  | 0.483492555 | 0.483492555 | -5.382427853 |
| 1422097_at   | -0.074343374 | 3.61149789  | -0.729334651 | 0.48356557  | 0.48356557  | -5.382510806 |
| 1456387_at   | -0.064283473 | 4.245290377 | -0.729281481 | 0.4835966   | 0.4835966   | -5.382546054 |
| 1444689_at   | 0.058554037  | 5.429430662 | 0.729240905  | 0.483620281 | 0.483620281 | -5.382572951 |
| 1436020_at   | 0.056800845  | 7.093417684 | 0.729158837  | 0.48366818  | 0.48366818  | -5.382627349 |
| 1452394_at   | -0.055102151 | 7.777674735 | -0.729022282 | 0.483747888 | 0.483747888 | -5.382717851 |
| 1455175_at   | -0.056971268 | 8.670969138 | -0.729020022 | 0.483749206 | 0.483749206 | -5.382719348 |
| 1436317_at   | 0.066030634  | 7.099112869 | 0.728960362  | 0.483784033 | 0.483784033 | -5.382758883 |
| 1438983_x_at | 0.07831359   | 9.345309522 | 0.728942752  | 0.483794313 | 0.483794313 | -5.382770553 |
| 1431079_at   | 0.075209071  | 5.538828189 | 0.728909765  | 0.48381357  | 0.48381357  | -5.38279241  |
| 1430270_at   | -0.072642198 | 6.122202323 | -0.728895381 | 0.483821967 | 0.483821967 | -5.382801941 |
| 1433751_at   | 0.06440039   | 10.51556498 | 0.728853206  | 0.483846589 | 0.483846589 | -5.382829885 |
| 1440300_at   | -0.059711744 | 5.044939452 | -0.728809082 | 0.483872349 | 0.483872349 | -5.382859119 |
| 1432824_at   | 0.052910094  | 3.561098991 | 0.728767351  | 0.483896713 | 0.483896713 | -5.382886766 |
| 1440184_at   | -0.087575154 | 5.951699891 | -0.728739834 | 0.483912779 | 0.483912779 | -5.382904996 |
| 1454493_at   | -0.048773092 | 3.941460051 | -0.728690476 | 0.483941598 | 0.483941598 | -5.382937694 |
| 1444220_at   | -0.056070878 | 4.197240287 | -0.728648131 | 0.483966323 | 0.483966323 | -5.382965743 |
| 1422376_at   | 0.050411466  | 3.255070682 | 0.728605536  | 0.483991194 | 0.483991194 | -5.382993957 |
| 1443083_at   | -0.062015022 | 6.461178804 | -0.728564844 | 0.484014956 | 0.484014956 | -5.38302091  |
| 1460082_at   | 0.059342507  | 5.667330233 | 0.728527218  | 0.484036927 | 0.484036927 | -5.38304583  |
| 1443668_x_at | 0.06072948   | 4.495741397 | 0.728524891  | 0.484038286 | 0.484038286 | -5.383047371 |
| 1458815_at   | -0.055331224 | 3.15321019  | -0.728515312 | 0.48404388  | 0.48404388  | -5.383053716 |
| 1431464_a_at | 0.072926598  | 5.278896641 | 0.72849783   | 0.484054088 | 0.484054088 | -5.383065293 |
| 1428677_at   | 0.049653916  | 8.278523329 | 0.728447666  | 0.484083383 | 0.484083383 | -5.383098515 |
| 1432712_at   | -0.081354621 | 4.786689031 | -0.728416139 | 0.484101795 | 0.484101795 | -5.383119393 |
| 1454534_at   | -0.067761179 | 3.650749744 | -0.728405812 | 0.484107825 | 0.484107825 | -5.383126231 |

|              |              |             |              |             |             |              |
|--------------|--------------|-------------|--------------|-------------|-------------|--------------|
| 1450963_at   | 0.049122967  | 10.33173091 | 0.728395104  | 0.484114079 | 0.484114079 | -5.383133322 |
| 1458269_at   | 0.14328179   | 7.206357234 | 0.728385495  | 0.484119691 | 0.484119691 | -5.383139685 |
| 1423703_at   | 0.054092122  | 8.479625553 | 0.728344514  | 0.484143625 | 0.484143625 | -5.383166822 |
| 1415750_at   | 0.057421917  | 7.602887683 | 0.72833062   | 0.484151739 | 0.484151739 | -5.383176021 |
| 1428600_at   | -0.04901116  | 8.333583932 | -0.728301881 | 0.484168525 | 0.484168525 | -5.383195051 |
| 1454473_at   | -0.056902797 | 4.881602468 | -0.728277765 | 0.48418261  | 0.48418261  | -5.383211018 |
| 1426524_at   | 0.087121596  | 8.823642425 | 0.728269521  | 0.484187424 | 0.484187424 | -5.383216476 |
| 1445943_at   | -0.090292834 | 4.115017156 | -0.728172117 | 0.484244317 | 0.484244317 | -5.383280963 |
| 1425167_a_at | -0.057890195 | 3.896352266 | -0.728139056 | 0.484263629 | 0.484263629 | -5.38330285  |
| 1456679_at   | -0.10179265  | 3.893596217 | -0.728054243 | 0.484313172 | 0.484313172 | -5.383358992 |
| 1438257_at   | -0.077447675 | 6.577592262 | -0.727986028 | 0.484353022 | 0.484353022 | -5.383404143 |
| 1448965_at   | 0.090974843  | 5.928597783 | 0.727884473  | 0.484412352 | 0.484412352 | -5.383471355 |
| 1458466_at   | -0.056100723 | 5.340188345 | -0.727880315 | 0.484414781 | 0.484414781 | -5.383474107 |
| 1421635_at   | -0.051779307 | 4.675558965 | -0.727870015 | 0.484420799 | 0.484420799 | -5.383480923 |
| 1443060_at   | -0.055261298 | 5.004225    | -0.727849492 | 0.48443279  | 0.48443279  | -5.383494505 |
| 1430174_at   | 0.053917551  | 3.165155143 | 0.727791412  | 0.484466724 | 0.484466724 | -5.383532939 |
| 1456151_at   | -0.057181159 | 4.895765367 | -0.7277444   | 0.484494192 | 0.484494192 | -5.383564046 |
| 1450570_a_at | -0.085930736 | 5.112857485 | -0.727678715 | 0.484532573 | 0.484532573 | -5.383607507 |
| 1430544_at   | -0.049015729 | 6.397258395 | -0.727605991 | 0.484575069 | 0.484575069 | -5.38365562  |
| 1431115_at   | 0.076178042  | 6.799225996 | 0.727587695  | 0.484585761 | 0.484585761 | -5.383667724 |
| 1441173_at   | -0.055264492 | 3.604712508 | -0.727557707 | 0.484603285 | 0.484603285 | -5.383687562 |
| 1440916_at   | -0.063936994 | 4.159297557 | -0.727540397 | 0.484613401 | 0.484613401 | -5.383699013 |
| 1434410_at   | -0.051686631 | 8.024012998 | -0.727528834 | 0.484620158 | 0.484620158 | -5.383706662 |
| 1441140_at   | -0.076005308 | 7.233986105 | -0.727485143 | 0.484645692 | 0.484645692 | -5.383735564 |
| 1443025_at   | 0.069058926  | 3.985769389 | 0.727393715  | 0.484699126 | 0.484699126 | -5.383796037 |
| 1436645_a_at | 0.050199378  | 8.527087803 | 0.727372644  | 0.484711441 | 0.484711441 | -5.383809972 |
| 1434338_at   | -0.073859843 | 8.872917621 | -0.727332925 | 0.484734656 | 0.484734656 | -5.383836241 |
| 1418053_at   | 0.050190332  | 6.322329309 | 0.727332792  | 0.484734733 | 0.484734733 | -5.383836329 |
| 1452681_at   | 0.046206963  | 10.11728803 | 0.727292949  | 0.484758021 | 0.484758021 | -5.383862679 |
| 1445283_at   | 0.063898788  | 3.507417094 | 0.727276284  | 0.484767762 | 0.484767762 | -5.3838737   |
| 1431417_at   | -0.065616143 | 4.228399066 | -0.727261729 | 0.48477627  | 0.48477627  | -5.383883324 |
| 1449212_at   | 0.049891527  | 3.615201507 | 0.72723407   | 0.484792437 | 0.484792437 | -5.383901615 |
| 1434032_at   | -0.062930449 | 4.624661671 | -0.727205135 | 0.484809351 | 0.484809351 | -5.383920748 |
| 1426626_at   | 0.053505847  | 7.394566685 | 0.727167494  | 0.484831354 | 0.484831354 | -5.383945637 |
| 1429332_at   | -0.086657139 | 7.142747831 | -0.727148137 | 0.484842669 | 0.484842669 | -5.383958436 |
| 1452621_at   | -0.075405583 | 8.268223633 | -0.727121575 | 0.484858197 | 0.484858197 | -5.383975999 |
| 1456209_x_at | 0.054180503  | 6.741691759 | 0.727116198  | 0.48486134  | 0.48486134  | -5.383979554 |
| 1436029_at   | -0.065720033 | 9.912255772 | -0.727058884 | 0.484894845 | 0.484894845 | -5.384017447 |
| 1439879_at   | 0.059195833  | 4.244472116 | 0.727045536  | 0.484902648 | 0.484902648 | -5.384026272 |
| 1423658_at   | -0.058601886 | 8.556266076 | -0.726988514 | 0.484935985 | 0.484935985 | -5.384063969 |
| 1417202_s_at | 0.073405151  | 9.789287852 | 0.726958009  | 0.48495382  | 0.48495382  | -5.384084135 |
| 1448179_at   | -0.047381307 | 9.838483167 | -0.726948247 | 0.484959527 | 0.484959527 | -5.384090588 |
| 1445080_at   | -0.063864648 | 5.178047231 | -0.726916486 | 0.484978097 | 0.484978097 | -5.384111582 |
| 1431715_a_at | -0.086620569 | 6.597355889 | -0.726896943 | 0.484989523 | 0.484989523 | -5.384124501 |
| 1451219_at   | 0.061919349  | 8.754115821 | 0.7267873    | 0.485053632 | 0.485053632 | -5.384196969 |
| 1420191_s_at | -0.082926826 | 5.751732021 | -0.726779056 | 0.485058452 | 0.485058452 | -5.384202418 |
| 1431376_at   | 0.070830672  | 4.189774734 | 0.726776832  | 0.485059752 | 0.485059752 | -5.384203887 |
| 1458645_at   | -0.066015065 | 4.54845907  | -0.726734033 | 0.485084779 | 0.485084779 | -5.384232173 |
| 1424858_at   | -0.05414493  | 7.808454145 | -0.726700755 | 0.485104239 | 0.485104239 | -5.384254165 |
| 1424343_a_at | 0.066128452  | 9.473086013 | 0.726699322  | 0.485105076 | 0.485105076 | -5.384255111 |
| 1421903_at   | -0.056325002 | 7.296234506 | -0.726693534 | 0.485108461 | 0.485108461 | -5.384258937 |
| 1420902_at   | 0.067987134  | 4.620336391 | 0.726638647  | 0.485140558 | 0.485140558 | -5.384295206 |
| 1429594_at   | 0.048224786  | 5.821364512 | 0.726637414  | 0.485141279 | 0.485141279 | -5.384296021 |

|                    |              |             |              |             |             |              |
|--------------------|--------------|-------------|--------------|-------------|-------------|--------------|
| 1435647_at         | 0.056899772  | 6.523715541 | 0.726630593  | 0.485145268 | 0.485145268 | -5.384300529 |
| 1445759_at         | 0.070184056  | 5.469129758 | 0.726597163  | 0.485164818 | 0.485164818 | -5.384322618 |
| 1459512_at         | 0.108781995  | 7.164188782 | 0.726591947  | 0.485167868 | 0.485167868 | -5.384326065 |
| 1446446_at         | -0.057811017 | 5.602282454 | -0.726586575 | 0.48517101  | 0.48517101  | -5.384329614 |
| 1456273_x_at       | -0.054648552 | 6.854414651 | -0.726537483 | 0.48519972  | 0.48519972  | -5.384362051 |
| 1457218_at         | -0.06174662  | 8.96096716  | -0.726485557 | 0.485230089 | 0.485230089 | -5.384396358 |
| 1448865_at         | -0.061252783 | 7.454776992 | -0.72637853  | 0.485292688 | 0.485292688 | -5.384467063 |
| 1442021_at         | 0.070886222  | 5.013095471 | 0.726317796  | 0.485328213 | 0.485328213 | -5.384507181 |
| 1452906_at         | 0.13328082   | 8.002213863 | 0.726270493  | 0.485355882 | 0.485355882 | -5.384538425 |
| 1424506_at         | 0.10215881   | 6.905204399 | 0.726135992  | 0.485434564 | 0.485434564 | -5.384627255 |
| 1431449_at         | 0.051303553  | 3.576270368 | 0.726102313  | 0.485454267 | 0.485454267 | -5.384649496 |
| 1459974_x_at       | 0.062668501  | 6.765537654 | 0.726036869  | 0.485492554 | 0.485492554 | -5.384692711 |
| 1449288_at         | -0.056102043 | 4.832983765 | -0.726007813 | 0.485509554 | 0.485509554 | -5.384711897 |
| 1457809_at         | -0.061248219 | 4.736989192 | -0.72599097  | 0.485519409 | 0.485519409 | -5.384723018 |
| 1430342_at         | -0.049856359 | 3.39423807  | -0.725964325 | 0.485534999 | 0.485534999 | -5.384740611 |
| 1419177_at         | 0.054569282  | 8.295338152 | 0.725924233  | 0.485558456 | 0.485558456 | -5.38476708  |
| 1441195_at         | 0.05211981   | 7.793242792 | 0.725868169  | 0.485591261 | 0.485591261 | -5.384804094 |
| 1460718_s_at       | -0.07946988  | 10.62561504 | -0.725866438 | 0.485592274 | 0.485592274 | -5.384805237 |
| 1444695_at         | 0.055096442  | 6.244413627 | 0.725832404  | 0.485612189 | 0.485612189 | -5.384827705 |
| 1424749_at         | -0.048723786 | 8.529748759 | -0.725831911 | 0.485612477 | 0.485612477 | -5.38482803  |
| 1460568_at         | -0.059934154 | 6.316614658 | -0.725824211 | 0.485616983 | 0.485616983 | -5.384833113 |
| 1451009_at         | -0.066430317 | 5.589691174 | -0.725818511 | 0.485620318 | 0.485620318 | -5.384836876 |
| 1456218_at         | -0.068043329 | 5.419328312 | -0.725803346 | 0.485629192 | 0.485629192 | -5.384846887 |
| 1441258_at         | -0.06251099  | 3.594164298 | -0.725755595 | 0.485657135 | 0.485657135 | -5.384878408 |
| 1425204_s_at       | -0.050930946 | 7.254895907 | -0.725738314 | 0.485667248 | 0.485667248 | -5.384889814 |
| 1441313_x_at       | 0.068880739  | 3.01231151  | 0.725708825  | 0.485684504 | 0.485684504 | -5.384909278 |
| 1438161_s_at       | 0.094451348  | 8.004445718 | 0.725640981  | 0.485724208 | 0.485724208 | -5.384954057 |
| 1430180_at         | -0.048877141 | 7.061957812 | -0.725521804 | 0.485793959 | 0.485793959 | -5.385032708 |
| 1415948_at         | -0.092031884 | 8.131866996 | -0.725437638 | 0.485843222 | 0.485843222 | -5.385088245 |
| 1451511_at         | -0.11090464  | 3.980343019 | -0.725430603 | 0.48584734  | 0.48584734  | -5.385092887 |
| 1435404_at         | 0.088054915  | 4.753161162 | 0.725405914  | 0.485861791 | 0.485861791 | -5.385109177 |
| 1431638_at         | 0.072135565  | 3.721890873 | 0.725266896  | 0.485943168 | 0.485943168 | -5.385200895 |
| 1417010_at         | -0.063913392 | 9.155671077 | -0.725228263 | 0.485965785 | 0.485965785 | -5.38522638  |
| 1459573_at         | 0.074967637  | 6.366929115 | 0.725225435  | 0.48596744  | 0.48596744  | -5.385228246 |
| 1444015_at         | 0.068336069  | 6.97793945  | 0.725200036  | 0.48598231  | 0.48598231  | -5.385245    |
| 1434611_at         | 0.067267805  | 7.486130293 | 0.725130937  | 0.486022763 | 0.486022763 | -5.385290578 |
| 1427286_at         | -0.059431353 | 3.843970364 | -0.725082871 | 0.486050905 | 0.486050905 | -5.385322281 |
| 1444686_at         | -0.065783993 | 3.654634941 | -0.725038977 | 0.486076605 | 0.486076605 | -5.38535123  |
| 1439363_at         | -0.097032808 | 6.96411632  | -0.725029729 | 0.486082019 | 0.486082019 | -5.385357329 |
| 1460680_a_at       | 0.044255011  | 13.68257916 | 0.725025917  | 0.486084251 | 0.486084251 | -5.385359843 |
| 1455116_at         | 0.048426099  | 7.750653653 | 0.725015058  | 0.48609061  | 0.48609061  | -5.385367005 |
| 1427620_at         | -0.066366617 | 5.385744736 | -0.724996826 | 0.486101284 | 0.486101284 | -5.385379028 |
| 1441088_at         | -0.069736053 | 5.499414991 | -0.724974622 | 0.486114286 | 0.486114286 | -5.385393671 |
| 1451772_at         | -0.075468128 | 5.217112301 | -0.724924352 | 0.486143721 | 0.486143721 | -5.385426822 |
| 1423575_a_at       | -0.046083365 | 8.88019518  | -0.724873855 | 0.486173291 | 0.486173291 | -5.385460119 |
| 1450634_at         | 0.05190409   | 9.712257378 | 0.724854616  | 0.486184557 | 0.486184557 | -5.385472805 |
| 1417659_at         | 0.056495447  | 9.510482194 | 0.724852149  | 0.486186001 | 0.486186001 | -5.385474431 |
| 1445465_at         | 0.071936399  | 4.503126787 | 0.724846575  | 0.486189265 | 0.486189265 | -5.385478106 |
| 1429105_at         | -0.065623723 | 3.807720617 | -0.724808461 | 0.486211585 | 0.486211585 | -5.385503237 |
| 1457906_at         | -0.063490155 | 3.328704179 | -0.724768125 | 0.486235207 | 0.486235207 | -5.385529831 |
| AFFX-r2-Ec-bioC-5_ | 0.075765176  | 9.741792724 | 0.724759383  | 0.486240326 | 0.486240326 | -5.385535594 |
| 1436236_x_at       | 0.075617632  | 9.248755804 | 0.724725778  | 0.486260006 | 0.486260006 | -5.385557749 |
| 1452258_at         | -0.061002328 | 7.345485719 | -0.724712154 | 0.486267985 | 0.486267985 | -5.385566731 |

|              |              |             |              |             |             |              |
|--------------|--------------|-------------|--------------|-------------|-------------|--------------|
| 1441913_at   | 0.065761537  | 3.340251932 | 0.724705069  | 0.486272135 | 0.486272135 | -5.385571402 |
| 1444417_at   | -0.063188153 | 4.163767004 | -0.724624582 | 0.486319274 | 0.486319274 | -5.38562446  |
| 1430890_at   | 0.074548358  | 3.997530213 | 0.724610564  | 0.486327484 | 0.486327484 | -5.385633699 |
| 1447133_at   | -0.065112905 | 3.317879318 | -0.724604809 | 0.486330854 | 0.486330854 | -5.385637493 |
| 1455386_at   | -0.050255751 | 3.503428824 | -0.72456737  | 0.486352783 | 0.486352783 | -5.385662171 |
| 1458508_at   | -0.065972012 | 8.020794117 | -0.724548817 | 0.486363649 | 0.486363649 | -5.3856744   |
| 1450260_at   | -0.067991868 | 5.109150778 | -0.724527675 | 0.486376033 | 0.486376033 | -5.385688334 |
| 1430729_at   | -0.119755988 | 4.335899875 | -0.72449869  | 0.486393011 | 0.486393011 | -5.385707438 |
| 1438327_at   | 0.046321015  | 4.35130996  | 0.724480067  | 0.486403919 | 0.486403919 | -5.385719712 |
| 1453301_a_at | 0.056768616  | 6.742211541 | 0.724407422  | 0.486446473 | 0.486446473 | -5.385767588 |
| 1441671_at   | -0.049918553 | 4.258478512 | -0.724386011 | 0.486459015 | 0.486459015 | -5.385781698 |
| 1443180_at   | -0.072262536 | 6.070476361 | -0.724385974 | 0.486459037 | 0.486459037 | -5.385781722 |
| 1427774_at   | 0.052460505  | 3.069117775 | 0.724310643  | 0.486503166 | 0.486503166 | -5.385831362 |
| 1453444_at   | -0.057521678 | 3.387797277 | -0.724269421 | 0.486527316 | 0.486527316 | -5.385858524 |
| 1426385_x_at | -0.071340852 | 12.63963397 | -0.724207468 | 0.486563612 | 0.486563612 | -5.385899342 |
| 1446584_at   | -0.064638328 | 4.563799517 | -0.724153735 | 0.486595093 | 0.486595093 | -5.385934743 |
| 1449303_at   | -0.053816424 | 9.778447627 | -0.724153525 | 0.486595216 | 0.486595216 | -5.385934882 |
| 1455651_at   | 0.043681832  | 9.205668388 | 0.724093739  | 0.486630245 | 0.486630245 | -5.385974267 |
| 1448092_x_at | -0.068798622 | 3.410079856 | -0.724063067 | 0.486648217 | 0.486648217 | -5.385994472 |
| 1433393_at   | -0.053744669 | 3.416410587 | -0.724040251 | 0.486661587 | 0.486661587 | -5.386009502 |
| 1436360_at   | -0.049162438 | 7.468825435 | -0.724035906 | 0.486664132 | 0.486664132 | -5.386012364 |
| 1424805_a_at | -0.074073496 | 8.258444308 | -0.723952578 | 0.48671296  | 0.48671296  | -5.38606725  |
| 1448079_at   | 0.062869058  | 7.60253032  | 0.723930496  | 0.4867259   | 0.4867259   | -5.386081793 |
| 1420743_a_at | 0.102243993  | 4.390475959 | 0.723869498  | 0.486761645 | 0.486761645 | -5.386121966 |
| 1458294_at   | -0.058910078 | 4.502992405 | -0.723826438 | 0.48678688  | 0.48678688  | -5.386150324 |
| 1416760_at   | -0.063099824 | 7.748370631 | -0.723774887 | 0.486817092 | 0.486817092 | -5.386184271 |
| 1428304_at   | 0.115803933  | 7.048866948 | 0.72376411   | 0.486823408 | 0.486823408 | -5.386191368 |
| 1419493_a_at | 0.053242515  | 8.899074521 | 0.723761955  | 0.486824671 | 0.486824671 | -5.386192787 |
| 1428086_at   | 0.042693738  | 10.70875513 | 0.72372191   | 0.486848141 | 0.486848141 | -5.386219156 |
| 1455306_at   | -0.054431601 | 8.712839395 | -0.723681379 | 0.486871896 | 0.486871896 | -5.386245843 |
| 1460258_at   | 0.29774897   | 6.796309171 | 0.72366177   | 0.486883389 | 0.486883389 | -5.386258754 |
| 1426527_at   | 0.059135251  | 8.362440144 | 0.723642037  | 0.486894955 | 0.486894955 | -5.386271746 |
| 1451002_at   | -0.054142282 | 10.69950811 | -0.723627846 | 0.486903273 | 0.486903273 | -5.386281089 |
| 1445314_at   | -0.062676094 | 3.318663684 | -0.723626896 | 0.48690383  | 0.48690383  | -5.386281714 |
| 1438092_x_at | 0.083387361  | 11.18602944 | 0.723389639  | 0.487042906 | 0.487042906 | -5.386437897 |
| 1428716_at   | -0.054989194 | 7.833223156 | -0.723377805 | 0.487049844 | 0.487049844 | -5.386445686 |
| 1427249_x_at | 0.05002492   | 3.027770041 | 0.723315051  | 0.487086634 | 0.487086634 | -5.386486987 |
| 1454823_at   | 0.059401053  | 6.984892263 | 0.723282949  | 0.487105455 | 0.487105455 | -5.386508115 |
| 1422977_at   | 0.067865465  | 5.378277047 | 0.723230295  | 0.487136326 | 0.487136326 | -5.386542766 |
| 1430078_a_at | -0.066770399 | 6.151138656 | -0.723228582 | 0.48713733  | 0.48713733  | -5.386543892 |
| 1417497_at   | -0.068550587 | 4.516840171 | -0.723171546 | 0.487170772 | 0.487170772 | -5.386581425 |
| 1417146_at   | -0.043723653 | 7.716083549 | -0.723082119 | 0.487223207 | 0.487223207 | -5.386640265 |
| 1422285_at   | 0.066460424  | 4.797388726 | 0.723055707  | 0.487238695 | 0.487238695 | -5.386657643 |
| 1425060_s_at | 0.108223324  | 4.468743667 | 0.723013348  | 0.487263534 | 0.487263534 | -5.386685511 |
| 1447191_at   | -0.109460799 | 4.492833578 | -0.722992057 | 0.487276019 | 0.487276019 | -5.386699518 |
| 1439370_x_at | -0.060601995 | 3.337504349 | -0.722964704 | 0.48729206  | 0.48729206  | -5.386717513 |
| 1450766_at   | 0.062308943  | 4.078208182 | 0.722961023  | 0.487294219 | 0.487294219 | -5.386719934 |
| 1417757_at   | 0.078376     | 7.495992935 | 0.722949342  | 0.487301069 | 0.487301069 | -5.386727618 |
| 1459381_at   | 0.082464233  | 4.735641055 | 0.72290539   | 0.487326844 | 0.487326844 | -5.386756531 |
| 1448947_at   | 0.053020987  | 8.902112718 | 0.722887051  | 0.487337599 | 0.487337599 | -5.386768594 |
| 1418828_at   | 0.050776549  | 7.969032396 | 0.722833259  | 0.487369147 | 0.487369147 | -5.386803976 |
| 1444535_at   | 0.08180737   | 5.579677484 | 0.722807024  | 0.487384534 | 0.487384534 | -5.386821232 |
| 1440676_at   | -0.051606457 | 3.551372846 | -0.722787537 | 0.487395963 | 0.487395963 | -5.386834049 |

|              |              |             |              |             |             |              |
|--------------|--------------|-------------|--------------|-------------|-------------|--------------|
| 1441384_at   | 0.073539491  | 4.545807759 | 0.722782632  | 0.487398839 | 0.487398839 | -5.386837275 |
| 1424147_at   | -0.049183867 | 10.51555386 | -0.722744325 | 0.487421307 | 0.487421307 | -5.386862469 |
| 1436067_at   | -0.048676775 | 6.955421016 | -0.722736456 | 0.487425923 | 0.487425923 | -5.386867644 |
| 1457052_at   | 0.075280375  | 4.503322749 | 0.722589068  | 0.487512375 | 0.487512375 | -5.386964568 |
| 1448188_at   | 0.060262398  | 9.066516776 | 0.722578308  | 0.487518687 | 0.487518687 | -5.386971643 |
| 1416364_at   | -0.07012239  | 12.57557433 | -0.722576464 | 0.487519768 | 0.487519768 | -5.386972855 |
| 1443988_at   | -0.071437349 | 8.744438379 | -0.72257083  | 0.487523073 | 0.487523073 | -5.38697656  |
| 1435152_at   | -0.083295057 | 7.972099752 | -0.722555246 | 0.487532215 | 0.487532215 | -5.386986807 |
| 1429875_at   | -0.049782037 | 3.117087014 | -0.72248192  | 0.48757523  | 0.48757523  | -5.387035018 |
| 1435512_at   | -0.064610787 | 6.06533392  | -0.722477003 | 0.487578114 | 0.487578114 | -5.387038251 |
| 1418988_at   | -0.057457408 | 8.499571631 | -0.722460899 | 0.487587562 | 0.487587562 | -5.387048838 |
| 1419475_a_at | 0.107360184  | 7.252575651 | 0.722428417  | 0.487606617 | 0.487606617 | -5.387070193 |
| 1436701_at   | -0.049601725 | 3.601777477 | -0.722285025 | 0.487690745 | 0.487690745 | -5.387164453 |
| 1420160_s_at | 0.076703392  | 4.567301066 | 0.722275881  | 0.487696111 | 0.487696111 | -5.387170464 |
| 1433007_at   | -0.04969736  | 3.774095118 | -0.722217651 | 0.487730277 | 0.487730277 | -5.387208737 |
| 1425127_at   | -0.072728622 | 3.562335392 | -0.722155768 | 0.487766588 | 0.487766588 | -5.387249408 |
| 1447607_at   | 0.047319294  | 5.487667926 | 0.722154313  | 0.487767442 | 0.487767442 | -5.387250364 |
| 1445378_at   | 0.050205331  | 3.182127803 | 0.72215075   | 0.487769533 | 0.487769533 | -5.387252706 |
| 1436464_at   | -0.052726849 | 4.139313298 | -0.722146295 | 0.487772147 | 0.487772147 | -5.387255634 |
| 1417303_at   | 0.078542394  | 6.798799571 | 0.722085086  | 0.487808065 | 0.487808065 | -5.387295858 |
| 1454750_a_at | -0.058078725 | 8.162073582 | -0.722037066 | 0.487836244 | 0.487836244 | -5.387327413 |
| 1447509_at   | 0.059159089  | 6.61635457  | 0.72199403   | 0.4878615   | 0.4878615   | -5.387355692 |
| 1458251_at   | -0.05507442  | 3.339454037 | -0.721982255 | 0.48786841  | 0.48786841  | -5.387363429 |
| 1442204_at   | -0.061631741 | 4.58493206  | -0.721968886 | 0.487876256 | 0.487876256 | -5.387372213 |
| 1447472_at   | -0.064231442 | 3.857743831 | -0.721856685 | 0.487942106 | 0.487942106 | -5.38744593  |
| 1420134_at   | -0.053557063 | 3.551890146 | -0.721775301 | 0.487989874 | 0.487989874 | -5.387499393 |
| 1459760_at   | -0.074463229 | 3.740006665 | -0.721773119 | 0.487991154 | 0.487991154 | -5.387500826 |
| 1429601_x_at | 0.073099533  | 7.568021807 | 0.721769637  | 0.487993198 | 0.487993198 | -5.387503114 |
| 1428187_at   | -0.063027424 | 9.655941486 | -0.721718566 | 0.488023175 | 0.488023175 | -5.38753666  |
| 1444255_at   | -0.050454993 | 6.717640395 | -0.721681392 | 0.488044996 | 0.488044996 | -5.387561078 |
| 1441259_s_at | -0.110106946 | 7.962798178 | -0.721553667 | 0.488119974 | 0.488119974 | -5.387644963 |
| 1429078_a_at | -0.052929232 | 8.264539143 | -0.721538776 | 0.488128716 | 0.488128716 | -5.387654743 |
| 1426400_a_at | 0.049403891  | 10.55296686 | 0.721531245  | 0.488133137 | 0.488133137 | -5.387659689 |
| 1424211_at   | -0.059827749 | 6.913449605 | -0.721528606 | 0.488134686 | 0.488134686 | -5.387661422 |
| 1428563_at   | 0.066331331  | 7.789402332 | 0.721490546  | 0.48815703  | 0.48815703  | -5.387686415 |
| 1431127_at   | -0.0861529   | 5.770680807 | -0.721470677 | 0.488168695 | 0.488168695 | -5.387699462 |
| 1431238_at   | -0.062775137 | 4.591571192 | -0.721453796 | 0.488178606 | 0.488178606 | -5.387710547 |
| 1431175_at   | 0.075769975  | 6.34953956  | 0.721390361  | 0.488215849 | 0.488215849 | -5.387752199 |
| 1446806_at   | -0.064637631 | 5.026585589 | -0.72137273  | 0.488226201 | 0.488226201 | -5.387763775 |
| 1440330_at   | -0.088502345 | 3.710728407 | -0.72135819  | 0.488234738 | 0.488234738 | -5.387773321 |
| 1419416_a_at | -0.06636576  | 7.809270817 | -0.721356016 | 0.488236014 | 0.488236014 | -5.387774749 |
| 1449351_s_at | -0.083546044 | 9.343698844 | -0.721306366 | 0.488265167 | 0.488265167 | -5.387807346 |
| 1434719_at   | 0.078916532  | 5.65260579  | 0.721305141  | 0.488265886 | 0.488265886 | -5.38780815  |
| 1446629_at   | -0.042880052 | 3.066660867 | -0.72123305  | 0.488308216 | 0.488308216 | -5.387855477 |
| 1445560_at   | -0.083353301 | 5.437540091 | -0.721199431 | 0.488327958 | 0.488327958 | -5.387877547 |
| 1447432_s_at | 0.082731123  | 8.141841355 | 0.721170251  | 0.488345093 | 0.488345093 | -5.387896701 |
| 1453960_a_at | 0.066420837  | 10.14830806 | 0.721160549  | 0.48835079  | 0.48835079  | -5.387903069 |
| 1427357_at   | -0.102682069 | 5.144927175 | -0.721083302 | 0.488396153 | 0.488396153 | -5.387953772 |
| 1416885_at   | 0.061949266  | 9.019692489 | 0.721010139  | 0.48843912  | 0.48843912  | -5.38800179  |
| 1446780_at   | 0.058440645  | 7.889740196 | 0.72095705   | 0.4884703   | 0.4884703   | -5.38803663  |
| 1450979_at   | -0.052945286 | 3.023325776 | -0.720934042 | 0.488483813 | 0.488483813 | -5.388051728 |
| 1416615_at   | -0.053564323 | 9.294245963 | -0.720884637 | 0.488512831 | 0.488512831 | -5.388084148 |
| 1454126_at   | -0.054908802 | 4.002673373 | -0.72083878  | 0.488539765 | 0.488539765 | -5.388114238 |

|              |              |             |              |             |             |              |
|--------------|--------------|-------------|--------------|-------------|-------------|--------------|
| 1452110_at   | 0.059758458  | 8.057911367 | 0.720794054  | 0.488566036 | 0.488566036 | -5.388143584 |
| 1430172_a_at | 0.05963113   | 6.719419076 | 0.720784143  | 0.488571858 | 0.488571858 | -5.388150086 |
| 1453357_at   | -0.051367155 | 4.885592624 | -0.720738629 | 0.488598593 | 0.488598593 | -5.388179947 |
| 1439081_at   | 0.053448674  | 7.226166502 | 0.720698025  | 0.488622445 | 0.488622445 | -5.388206585 |
| 1418227_at   | -0.070133326 | 6.432190223 | -0.720652951 | 0.488648923 | 0.488648923 | -5.388236154 |
| 1441640_at   | -0.050210185 | 4.612614111 | -0.720626843 | 0.488664261 | 0.488664261 | -5.388253281 |
| 1432887_at   | -0.062990079 | 3.623264826 | -0.720599773 | 0.488680164 | 0.488680164 | -5.388271038 |
| 1454205_at   | -0.049663601 | 4.016929873 | -0.720558151 | 0.488704616 | 0.488704616 | -5.388298339 |
| 1457041_at   | -0.081429121 | 6.182828659 | -0.720557437 | 0.488705036 | 0.488705036 | -5.388298808 |
| 1455206_at   | 0.049685416  | 9.686045531 | 0.720526874  | 0.488722991 | 0.488722991 | -5.388318854 |
| 1450343_at   | -0.04706225  | 3.239133301 | -0.720515048 | 0.488729939 | 0.488729939 | -5.388326611 |
| 1424477_at   | -0.047947239 | 5.016557943 | -0.720503857 | 0.488736514 | 0.488736514 | -5.38833395  |
| 1429304_at   | 0.047235246  | 8.781900762 | 0.72045113   | 0.488767493 | 0.488767493 | -5.388368532 |
| 1421877_at   | -0.045325318 | 8.772688248 | -0.720431977 | 0.488778746 | 0.488778746 | -5.388381093 |
| 1448585_at   | 0.046503436  | 8.580436534 | 0.720351103  | 0.488826266 | 0.488826266 | -5.388434129 |
| 1459255_at   | -0.065494792 | 3.371636958 | -0.720220469 | 0.488903029 | 0.488903029 | -5.388519786 |
| 1417446_at   | -0.084351716 | 7.622267726 | -0.720188853 | 0.488921608 | 0.488921608 | -5.388540514 |
| 1423223_a_at | 0.051109371  | 10.07924673 | 0.720188311  | 0.488921926 | 0.488921926 | -5.388540869 |
| 1431698_at   | -0.049828236 | 3.807765673 | -0.720179009 | 0.488927393 | 0.488927393 | -5.388546968 |
| 1451159_at   | -0.076544327 | 9.581558912 | -0.720126012 | 0.488958538 | 0.488958538 | -5.388581713 |
| 1423744_x_at | -0.134663564 | 11.02869695 | -0.720058651 | 0.488998126 | 0.488998126 | -5.388625871 |
| 1448208_at   | -0.051379922 | 9.703372812 | -0.720045216 | 0.489006022 | 0.489006022 | -5.388634678 |
| 1443107_at   | -0.061993518 | 6.806715834 | -0.7199832   | 0.489042472 | 0.489042472 | -5.388675328 |
| 1449143_at   | 0.052902887  | 3.616604494 | 0.719954081  | 0.489059586 | 0.489059586 | -5.388694414 |
| 1434367_s_at | 0.051738983  | 12.24385507 | 0.719926376  | 0.489075871 | 0.489075871 | -5.388712572 |
| 1459032_at   | -0.060118011 | 5.332271275 | -0.719912323 | 0.48908413  | 0.48908413  | -5.388721783 |
| 1440983_at   | 0.051751029  | 5.608346375 | 0.719892371  | 0.489095858 | 0.489095858 | -5.388734859 |
| 1420023_at   | 0.116395744  | 6.045335743 | 0.719892146  | 0.48909599  | 0.48909599  | -5.388735007 |
| 1443954_at   | -0.066218422 | 7.423691441 | -0.71987497  | 0.489106086 | 0.489106086 | -5.388746264 |
| 1432383_a_at | 0.059954762  | 5.545464443 | 0.719856129  | 0.489117161 | 0.489117161 | -5.388758611 |
| 1441346_at   | 0.138423115  | 4.205043263 | 0.719841748  | 0.489125614 | 0.489125614 | -5.388768035 |
| 1420974_at   | -0.053017513 | 7.542094429 | -0.719761904 | 0.489172549 | 0.489172549 | -5.388820358 |
| 1460193_at   | -0.055731679 | 9.913649597 | -0.719674443 | 0.489223965 | 0.489223965 | -5.388877667 |
| 1457358_at   | -0.068817175 | 8.712355309 | -0.719649597 | 0.489238572 | 0.489238572 | -5.388893946 |
| 1422975_at   | 0.069343521  | 8.719795086 | 0.719640074  | 0.48924417  | 0.48924417  | -5.388900185 |
| 1450486_a_at | -0.057135101 | 4.94516467  | -0.71963365  | 0.489247947 | 0.489247947 | -5.388904394 |
| 1417613_at   | 0.060397834  | 6.578941786 | 0.719589293  | 0.489274025 | 0.489274025 | -5.388933455 |
| 1443383_at   | -0.066654164 | 4.937962571 | -0.719530429 | 0.489308634 | 0.489308634 | -5.388972018 |
| 1454466_at   | 0.042507986  | 4.156768237 | 0.719500767  | 0.489326074 | 0.489326074 | -5.388991449 |
| 1453710_at   | -0.062831098 | 3.515668156 | -0.71949806  | 0.489327666 | 0.489327666 | -5.388993222 |
| 1423725_at   | -0.084906771 | 9.658626276 | -0.719478448 | 0.489339197 | 0.489339197 | -5.389006069 |
| 1419581_at   | 0.070557313  | 5.997620931 | 0.719462899  | 0.489348339 | 0.489348339 | -5.389016254 |
| 1445340_at   | -0.085739246 | 6.832024979 | -0.719417768 | 0.489374876 | 0.489374876 | -5.389045816 |
| 1423512_at   | 0.048210089  | 8.42494344  | 0.719398456  | 0.489386232 | 0.489386232 | -5.389058466 |
| 1440274_at   | 0.055155197  | 5.056248242 | 0.719335182  | 0.489423438 | 0.489423438 | -5.389099908 |
| 1439983_a_at | 0.0669756    | 5.173295678 | 0.719296595  | 0.489446129 | 0.489446129 | -5.389125179 |
| 1453969_at   | 0.072017741  | 3.365154132 | 0.719256287  | 0.489469833 | 0.489469833 | -5.389151576 |
| 1436451_a_at | -0.049658704 | 11.84596409 | -0.719203582 | 0.489500828 | 0.489500828 | -5.38918609  |
| 1419883_s_at | 0.055136999  | 7.530442645 | 0.719165851  | 0.489523018 | 0.489523018 | -5.389210798 |
| 1445795_at   | 0.061535439  | 5.018311964 | 0.719134943  | 0.489541195 | 0.489541195 | -5.389231035 |
| 1426274_at   | -0.061585698 | 5.627558208 | -0.719131193 | 0.489543401 | 0.489543401 | -5.389233491 |
| 1419077_at   | -0.064433826 | 6.013365417 | -0.719098561 | 0.489562593 | 0.489562593 | -5.389254857 |
| 1429717_at   | -0.063567233 | 5.026533177 | -0.719096172 | 0.489563998 | 0.489563998 | -5.389256421 |

|              |              |             |              |             |             |              |
|--------------|--------------|-------------|--------------|-------------|-------------|--------------|
| 1430036_at   | -0.126130207 | 5.3095352   | -0.719060802 | 0.489584801 | 0.489584801 | -5.389279579 |
| 1442611_at   | -0.061540048 | 4.899530835 | -0.719010069 | 0.489614641 | 0.489614641 | -5.389312794 |
| 1424452_at   | 0.047372704  | 9.980757686 | 0.71899741   | 0.489622087 | 0.489622087 | -5.389321081 |
| 1448940_at   | 0.064975577  | 6.736915825 | 0.718989154  | 0.489626943 | 0.489626943 | -5.389326486 |
| 1451110_at   | -0.083375416 | 8.087293772 | -0.718903227 | 0.489677486 | 0.489677486 | -5.389382736 |
| 1454960_at   | -0.059477336 | 9.587417461 | -0.718878744 | 0.489691888 | 0.489691888 | -5.389398762 |
| 1441176_at   | -0.0774863   | 3.458104395 | -0.718874312 | 0.489694495 | 0.489694495 | -5.389401663 |
| 1446375_at   | 0.061932449  | 4.205440143 | 0.718819844  | 0.489726536 | 0.489726536 | -5.389437315 |
| 1419594_at   | 0.101662015  | 5.297886254 | 0.718748858  | 0.489768296 | 0.489768296 | -5.389483775 |
| 1439562_at   | -0.066476309 | 7.918313689 | -0.718699841 | 0.489797133 | 0.489797133 | -5.389515854 |
| 1454474_at   | -0.079995731 | 4.685071245 | -0.71857929  | 0.489868059 | 0.489868059 | -5.38959474  |
| 1454501_at   | 0.082626177  | 3.757017719 | 0.718531051  | 0.489896442 | 0.489896442 | -5.389626303 |
| 1443419_at   | 0.060954682  | 3.786361174 | 0.718525205  | 0.489899882 | 0.489899882 | -5.389630128 |
| 1426035_at   | -0.097337512 | 5.64812082  | -0.7184964   | 0.489916831 | 0.489916831 | -5.389648975 |
| 1426218_at   | 0.0596931    | 7.865810116 | 0.718375399  | 0.489988032 | 0.489988032 | -5.389728135 |
| 1419481_at   | 0.076655743  | 4.977947346 | 0.718348657  | 0.490003769 | 0.490003769 | -5.389745629 |
| 1445339_at   | -0.067570652 | 3.940843455 | -0.718317414 | 0.490022156 | 0.490022156 | -5.389766066 |
| 1417823_at   | 0.054788565  | 8.225573409 | 0.718221756  | 0.490078452 | 0.490078452 | -5.389828634 |
| 1442644_at   | -0.055540967 | 4.376056604 | -0.718112811 | 0.490142572 | 0.490142572 | -5.389899884 |
| 1441710_at   | -0.069154291 | 4.45091584  | -0.718063893 | 0.490171364 | 0.490171364 | -5.389931873 |
| 1418684_at   | -0.127060372 | 6.926942935 | -0.718039155 | 0.490185926 | 0.490185926 | -5.38994805  |
| 1424783_a_at | -0.1063026   | 7.996845324 | -0.717948813 | 0.490239104 | 0.490239104 | -5.390007121 |
| 1439583_x_at | -0.052893186 | 7.040155805 | -0.717948538 | 0.490239266 | 0.490239266 | -5.390007301 |
| 1444812_at   | -0.057835101 | 3.248603434 | -0.717941918 | 0.490243163 | 0.490243163 | -5.390011629 |
| 1417224_a_at | 0.080668845  | 6.632567371 | 0.717816432  | 0.490317035 | 0.490317035 | -5.390093668 |
| 1430090_at   | -0.083219845 | 4.97182057  | -0.717791155 | 0.490331916 | 0.490331916 | -5.390110191 |
| 1460726_at   | -0.045817521 | 10.56175238 | -0.717738482 | 0.490362926 | 0.490362926 | -5.390144622 |
| 1425366_a_at | 0.057688676  | 6.475829007 | 0.717726309  | 0.490370093 | 0.490370093 | -5.390152579 |
| 1447667_x_at | -0.081882717 | 6.581772999 | -0.717685004 | 0.490394412 | 0.490394412 | -5.390179578 |
| 1429214_at   | -0.051164368 | 6.459039233 | -0.717616096 | 0.490434984 | 0.490434984 | -5.390224615 |
| 1430570_at   | 0.052596566  | 3.569912255 | 0.717550287  | 0.490473733 | 0.490473733 | -5.390267622 |
| 1419105_at   | -0.055408837 | 3.959888986 | -0.717546289 | 0.490476087 | 0.490476087 | -5.390270235 |
| 1442449_at   | 0.069929107  | 3.522766471 | 0.717492286  | 0.490507887 | 0.490507887 | -5.390305525 |
| 1420058_s_at | 0.043706742  | 8.580971296 | 0.717458615  | 0.490527714 | 0.490527714 | -5.390327527 |
| 1432325_at   | -0.073972656 | 4.026344631 | -0.717443666 | 0.490536518 | 0.490536518 | -5.390337296 |
| 1419073_at   | -0.09078197  | 6.459386262 | -0.717438834 | 0.490539363 | 0.490539363 | -5.390340453 |
| 1424113_at   | 0.094719029  | 8.053993671 | 0.717437728  | 0.490540014 | 0.490540014 | -5.390341175 |
| 1456321_at   | 0.052076501  | 3.234147083 | 0.717411149  | 0.490555666 | 0.490555666 | -5.390358542 |
| 1426782_at   | 0.092924084  | 10.34656031 | 0.717319261  | 0.49060978  | 0.49060978  | -5.390418577 |
| 1431435_at   | -0.097142992 | 4.411930217 | -0.717229822 | 0.490662455 | 0.490662455 | -5.390477006 |
| 1445156_at   | 0.049565296  | 3.924100857 | 0.717186497  | 0.490687973 | 0.490687973 | -5.390505307 |
| 1446005_at   | 0.058923753  | 4.569423615 | 0.717146924  | 0.490711282 | 0.490711282 | -5.390531156 |
| 1442114_at   | -0.062581542 | 6.337200655 | -0.717127697 | 0.490722607 | 0.490722607 | -5.390543715 |
| 1429174_at   | -0.066337583 | 7.925431723 | -0.716934612 | 0.490836345 | 0.490836345 | -5.390669816 |
| 1418275_a_at | -0.051661171 | 9.036500026 | -0.716893606 | 0.490860502 | 0.490860502 | -5.390696592 |
| 1421806_at   | -0.071212219 | 3.486054491 | -0.716839597 | 0.490892321 | 0.490892321 | -5.390731858 |
| 1430371_x_at | -0.064688991 | 3.559910976 | -0.716785536 | 0.490924171 | 0.490924171 | -5.390767155 |
| 1424397_at   | 0.04874103   | 9.285453973 | 0.716780676  | 0.490927035 | 0.490927035 | -5.390770328 |
| 1430772_at   | -0.064230208 | 3.779704511 | -0.716657441 | 0.490999645 | 0.490999645 | -5.39085078  |
| 1428548_at   | -0.052369921 | 8.015590984 | -0.716579801 | 0.491045394 | 0.491045394 | -5.39090146  |
| 1431069_at   | -0.05065059  | 3.62948395  | -0.716562902 | 0.491055352 | 0.491055352 | -5.390912491 |
| 1451217_a_at | -0.046672195 | 10.05643013 | -0.716560467 | 0.491056787 | 0.491056787 | -5.39091408  |
| 1448538_a_at | 0.061543537  | 10.31854687 | 0.716491962  | 0.491097155 | 0.491097155 | -5.390958791 |



|              |              |             |              |             |             |              |
|--------------|--------------|-------------|--------------|-------------|-------------|--------------|
| 1417323_at   | 0.043861843  | 8.805287161 | 0.716489127  | 0.491098826 | 0.491098826 | -5.390960642 |
| 1435472_at   | -0.068769589 | 8.135437939 | -0.716482845 | 0.491102528 | 0.491102528 | -5.390964741 |
| 1432035_at   | 0.068541023  | 4.529811421 | 0.716410918  | 0.491144916 | 0.491144916 | -5.391011682 |
| 1448013_at   | 0.061504966  | 7.822976123 | 0.716358621  | 0.491175737 | 0.491175737 | -5.391045809 |
| 1415719_s_at | 0.082799695  | 9.185512026 | 0.716295858  | 0.491212728 | 0.491212728 | -5.391086764 |
| 1419522_at   | 0.072109805  | 8.54933426  | 0.716211643  | 0.491262365 | 0.491262365 | -5.391141711 |
| 1418555_x_at | -0.060307074 | 4.021289006 | -0.716191134 | 0.491274453 | 0.491274453 | -5.391155091 |
| 1439146_s_at | -0.055455806 | 6.313100618 | -0.716150344 | 0.491298496 | 0.491298496 | -5.391181702 |
| 1430579_at   | 0.078942491  | 5.547523831 | 0.716113752  | 0.491320066 | 0.491320066 | -5.391205573 |
| 1437938_x_at | -0.057939387 | 7.073001607 | -0.716070962 | 0.49134529  | 0.49134529  | -5.391233487 |
| 1420186_at   | -0.079830044 | 3.430844197 | -0.71594761  | 0.491418007 | 0.491418007 | -5.391313945 |
| 1445926_at   | -0.064692774 | 3.986700065 | -0.715675729 | 0.491578309 | 0.491578309 | -5.39149124  |
| 1437312_at   | -0.093896053 | 5.994572952 | -0.715629114 | 0.491605797 | 0.491605797 | -5.391521632 |
| 1442966_at   | 0.069508806  | 4.291944532 | 0.715625699  | 0.49160781  | 0.49160781  | -5.391523859 |
| 1425292_at   | -0.067563833 | 5.446961673 | -0.71557551  | 0.491637406 | 0.491637406 | -5.391556578 |
| 1456100_at   | -0.069235007 | 5.816618734 | -0.715572047 | 0.491639449 | 0.491639449 | -5.391558836 |
| 1424040_at   | -0.110073611 | 9.494582603 | -0.715557853 | 0.491647819 | 0.491647819 | -5.391568089 |
| 1450684_at   | 0.093241993  | 4.134337907 | 0.715490021  | 0.491687821 | 0.491687821 | -5.391612307 |
| 1444737_at   | 0.05794655   | 3.986185239 | 0.715469494  | 0.491699927 | 0.491699927 | -5.391625688 |
| 1427394_at   | -0.076431552 | 6.866349257 | -0.71537054  | 0.491758288 | 0.491758288 | -5.391690185 |
| 1440176_x_at | 0.048871892  | 3.442604584 | 0.7153666    | 0.491760611 | 0.491760611 | -5.391692752 |
| 1416657_at   | -0.072239075 | 10.70539334 | -0.715254114 | 0.491826958 | 0.491826958 | -5.39176606  |
| 1417121_at   | 0.049789676  | 3.652619837 | 0.715198826  | 0.49185957  | 0.49185957  | -5.391802087 |
| 1427185_at   | -0.064726514 | 9.746180613 | -0.715175638 | 0.491873248 | 0.491873248 | -5.391817197 |
| 1453450_at   | -0.073111922 | 4.681309549 | -0.71517199  | 0.4918754   | 0.4918754   | -5.391819574 |
| 1456045_at   | -0.070879482 | 6.230712691 | -0.715168364 | 0.491877539 | 0.491877539 | -5.391821936 |
| 1446785_at   | -0.08060222  | 3.937285811 | -0.715141382 | 0.491893456 | 0.491893456 | -5.391839517 |
| 1441440_at   | 0.06963225   | 6.685601168 | 0.715006853  | 0.491972818 | 0.491972818 | -5.391927164 |
| 1453204_at   | 0.061505931  | 4.222365056 | 0.714996455  | 0.491978952 | 0.491978952 | -5.391933938 |
| 1442367_at   | 0.091079067  | 5.137223832 | 0.714979109  | 0.491989186 | 0.491989186 | -5.391945238 |
| 1433301_at   | 0.047974336  | 3.97382681  | 0.714945491  | 0.49200902  | 0.49200902  | -5.391967138 |
| 1416507_at   | -0.067390865 | 4.686768386 | -0.714899693 | 0.49203604  | 0.49203604  | -5.39199697  |
| 1447005_at   | -0.06562613  | 4.611107909 | -0.714878632 | 0.492048466 | 0.492048466 | -5.392010688 |
| 1448115_at   | -0.059439618 | 8.160215083 | -0.714766391 | 0.492114693 | 0.492114693 | -5.392083792 |
| 1425483_at   | -0.070249324 | 7.859784841 | -0.714713635 | 0.492145823 | 0.492145823 | -5.392118149 |
| 1435700_at   | -0.0606741   | 6.686922244 | -0.714695439 | 0.49215656  | 0.49215656  | -5.392129998 |
| 1428068_at   | 0.05402034   | 9.530151515 | 0.71468587   | 0.492162207 | 0.492162207 | -5.39213623  |
| 1433394_at   | -0.057436087 | 4.44891128  | -0.714609704 | 0.492207154 | 0.492207154 | -5.392185827 |
| 1433104_at   | 0.070780515  | 5.045639617 | 0.714523969  | 0.492257751 | 0.492257751 | -5.392241649 |
| 1459042_at   | -0.048475578 | 3.466832782 | -0.714475589 | 0.492286303 | 0.492286303 | -5.392273147 |
| 1420109_at   | 0.060101622  | 3.32021448  | 0.7144511    | 0.492300757 | 0.492300757 | -5.39228909  |
| 1434351_at   | 0.050293658  | 8.536399649 | 0.714430321  | 0.49231302  | 0.49231302  | -5.392302617 |
| 1439930_at   | 0.058484144  | 6.45059759  | 0.714423615  | 0.492316979 | 0.492316979 | -5.392306983 |
| 1454612_at   | 0.083167485  | 10.19943201 | 0.714423126  | 0.492317267 | 0.492317267 | -5.392307301 |
| 1418827_at   | -0.054297153 | 7.691162081 | -0.714345399 | 0.492363144 | 0.492363144 | -5.392357898 |
| 1443523_at   | -0.064256069 | 4.070381425 | -0.71432789  | 0.492373479 | 0.492373479 | -5.392369295 |
| 1424551_at   | -0.063219128 | 3.936899382 | -0.714321454 | 0.492377278 | 0.492377278 | -5.392373484 |
| 1440309_at   | -0.074220284 | 4.862252919 | -0.714295798 | 0.492392422 | 0.492392422 | -5.392390183 |
| 1443285_at   | -0.082627161 | 4.219418123 | -0.714231293 | 0.492430498 | 0.492430498 | -5.392432167 |
| 1436098_at   | -0.04776235  | 6.888596299 | -0.714203741 | 0.492446763 | 0.492446763 | -5.392450099 |
| 1454781_x_at | 0.059682958  | 6.33884652  | 0.714141359  | 0.492483588 | 0.492483588 | -5.392490696 |
| 1425817_a_at | -0.060391166 | 4.062174853 | -0.714108149 | 0.492503194 | 0.492503194 | -5.392512307 |
| 1426500_at   | -0.058652153 | 8.208436194 | -0.714041727 | 0.492542407 | 0.492542407 | -5.392555529 |

|              |              |             |              |             |             |              |
|--------------|--------------|-------------|--------------|-------------|-------------|--------------|
| 1453423_at   | -0.067478289 | 3.83802531  | -0.714037426 | 0.492544946 | 0.492544946 | -5.392558327 |
| 1441721_at   | -0.054827586 | 4.457170594 | -0.714031952 | 0.492548178 | 0.492548178 | -5.392561889 |
| 1432482_at   | -0.051558282 | 3.364224203 | -0.714021972 | 0.49255407  | 0.49255407  | -5.392568382 |
| 1442282_at   | -0.057410822 | 3.281393103 | -0.713984754 | 0.492576044 | 0.492576044 | -5.392592599 |
| 1435262_at   | 0.079697019  | 8.059549113 | 0.713924073  | 0.492611871 | 0.492611871 | -5.392632078 |
| 1417696_at   | -0.046980942 | 7.545945816 | -0.713887785 | 0.492633297 | 0.492633297 | -5.392655686 |
| 1441361_at   | 0.058179473  | 5.574171492 | 0.713843584  | 0.492659396 | 0.492659396 | -5.392684441 |
| 1441056_at   | 0.063588704  | 6.405143522 | 0.713823334  | 0.492671354 | 0.492671354 | -5.392697614 |
| 1453496_at   | -0.075403497 | 5.200040584 | -0.71378468  | 0.492694178 | 0.492694178 | -5.392722758 |
| 1440770_at   | 0.093364008  | 7.099352425 | 0.71378266   | 0.492695371 | 0.492695371 | -5.392724071 |
| 1434386_at   | 0.07982901   | 7.593345431 | 0.713758307  | 0.492709752 | 0.492709752 | -5.392739912 |
| 1440191_s_at | -0.061042379 | 5.757420325 | -0.713756983 | 0.492710533 | 0.492710533 | -5.392740773 |
| 1443712_x_at | -0.054208971 | 3.051769152 | -0.713732113 | 0.49272522  | 0.49272522  | -5.39275695  |
| 1452703_at   | 0.060034702  | 8.328257783 | 0.71372502   | 0.492729408 | 0.492729408 | -5.392761563 |
| 1451041_at   | 0.055381639  | 7.977932251 | 0.713681694  | 0.492754993 | 0.492754993 | -5.392789743 |
| 1424555_at   | -0.056769347 | 7.849744407 | -0.713667573 | 0.492763333 | 0.492763333 | -5.392798927 |
| 1434967_at   | -0.058282554 | 9.5741964   | -0.713608781 | 0.492798053 | 0.492798053 | -5.392837163 |
| 1441203_at   | -0.071729028 | 4.866710229 | -0.713544894 | 0.492835784 | 0.492835784 | -5.392878709 |
| 1435982_at   | 0.07649943   | 7.174458775 | 0.713502697  | 0.492860706 | 0.492860706 | -5.392906148 |
| 1459441_at   | 0.073870937  | 6.306222522 | 0.713501543  | 0.492861388 | 0.492861388 | -5.392906898 |
| 1424547_at   | 0.123564318  | 4.336881387 | 0.71349223   | 0.492866888 | 0.492866888 | -5.392912954 |
| 1455146_at   | -0.061912607 | 6.663979478 | -0.713464779 | 0.492883102 | 0.492883102 | -5.392930804 |
| 1437120_at   | -0.060704895 | 7.27846187  | -0.713421097 | 0.492908903 | 0.492908903 | -5.392959206 |
| 1458044_at   | 0.045938746  | 4.053408231 | 0.713410008  | 0.492915452 | 0.492915452 | -5.392966415 |
| 1423656_x_at | 0.061061387  | 8.32160988  | 0.71338234   | 0.492931795 | 0.492931795 | -5.392984404 |
| 1445487_at   | -0.050427002 | 3.78392792  | -0.71334516  | 0.492953757 | 0.492953757 | -5.393008576 |
| 1426364_at   | 0.053133506  | 8.357825254 | 0.71334377   | 0.492954577 | 0.492954577 | -5.393009479 |
| 1440994_at   | -0.051211735 | 6.924057793 | -0.713324668 | 0.492965861 | 0.492965861 | -5.393021898 |
| 1432441_at   | -0.05932873  | 6.507570995 | -0.713310984 | 0.492973944 | 0.492973944 | -5.393030794 |
| 1439916_at   | -0.064515959 | 3.482310628 | -0.713286708 | 0.492988284 | 0.492988284 | -5.393046575 |
| 1418021_at   | -0.11126305  | 6.67583937  | -0.713283043 | 0.492990449 | 0.492990449 | -5.393048958 |
| 1427494_at   | -0.045935145 | 4.532495091 | -0.713267605 | 0.492999569 | 0.492999569 | -5.393058994 |
| 1428849_at   | -0.074619616 | 7.774310388 | -0.713205276 | 0.493036389 | 0.493036389 | -5.39309951  |
| 1445609_at   | -0.046686459 | 3.390496306 | -0.71319077  | 0.493044959 | 0.493044959 | -5.393108939 |
| 1447260_at   | -0.043635434 | 3.891898587 | -0.71318965  | 0.49304562  | 0.49304562  | -5.393109666 |
| 1428214_at   | 0.051933375  | 9.552880898 | 0.713042381  | 0.493132626 | 0.493132626 | -5.393205382 |
| 1453491_at   | -0.056619563 | 5.64318401  | -0.712977965 | 0.493170686 | 0.493170686 | -5.393247243 |
| 1428324_at   | 0.053324795  | 4.735862161 | 0.712973367  | 0.493173402 | 0.493173402 | -5.39325023  |
| 1432505_at   | 0.069237185  | 3.789430563 | 0.712904573  | 0.493214051 | 0.493214051 | -5.393294933 |
| 1423200_at   | 0.059610888  | 9.942584177 | 0.712872065  | 0.49323326  | 0.49323326  | -5.393316054 |
| 1422247_a_at | 0.549661481  | 4.846325584 | 0.712851873  | 0.493245191 | 0.493245191 | -5.393329174 |
| 1437491_at   | 0.078188569  | 6.237508371 | 0.712822309  | 0.493262661 | 0.493262661 | -5.393348382 |
| 1441558_at   | 0.062947701  | 7.330144262 | 0.712651773  | 0.493363441 | 0.493363441 | -5.393459167 |
| 1441345_at   | -0.072857059 | 5.383250366 | -0.712567234 | 0.493413405 | 0.493413405 | -5.393514078 |
| 1427885_at   | 0.075359586  | 7.127396278 | 0.712512559  | 0.493445721 | 0.493445721 | -5.393549587 |
| 1457252_x_at | -0.08135749  | 7.178044198 | -0.712493503 | 0.493456984 | 0.493456984 | -5.393561963 |
| 1429556_at   | -0.063954498 | 10.00147245 | -0.71246699  | 0.493472656 | 0.493472656 | -5.393579181 |
| 1416346_at   | 0.074735614  | 7.893255141 | 0.712465405  | 0.493473592 | 0.493473592 | -5.393580211 |
| 1416681_at   | 0.138277228  | 7.221737545 | 0.712462859  | 0.493475097 | 0.493475097 | -5.393581864 |
| 1459884_at   | -0.079123214 | 6.170710164 | -0.712425284 | 0.493497308 | 0.493497308 | -5.393606265 |
| 1430407_at   | 0.084997988  | 6.646349694 | 0.71238722   | 0.493519807 | 0.493519807 | -5.393630982 |
| 1434459_at   | 0.073497384  | 8.678813686 | 0.712346479  | 0.49354389  | 0.49354389  | -5.393657437 |
| 1450676_at   | -0.069423177 | 7.066239446 | -0.712344121 | 0.493545284 | 0.493545284 | -5.393658968 |

|              |              |             |              |             |             |              |
|--------------|--------------|-------------|--------------|-------------|-------------|--------------|
| 1446222_at   | 0.081832073  | 4.407203705 | 0.712334152  | 0.493551177 | 0.493551177 | -5.393665441 |
| 1451023_at   | 0.061926841  | 6.676619881 | 0.712277073  | 0.49358492  | 0.49358492  | -5.393702501 |
| 1446461_at   | 0.12370044   | 5.212191145 | 0.712271516  | 0.493588204 | 0.493588204 | -5.393706109 |
| 1439901_at   | 0.058374488  | 6.948001528 | 0.712268893  | 0.493589755 | 0.493589755 | -5.393707812 |
| 1423508_at   | 0.066275365  | 9.533342739 | 0.712135627  | 0.493668542 | 0.493668542 | -5.393794328 |
| 1426199_x_at | -0.050849952 | 3.076742975 | -0.712039712 | 0.493725251 | 0.493725251 | -5.393856587 |
| 1459578_at   | -0.056777227 | 4.686616996 | -0.712015659 | 0.493739473 | 0.493739473 | -5.393872199 |
| 1431051_at   | -0.063028801 | 5.044263917 | -0.711999255 | 0.493749173 | 0.493749173 | -5.393882846 |
| 1457320_at   | 0.054297684  | 3.691954559 | 0.711998998  | 0.493749325 | 0.493749325 | -5.393883013 |
| 1420463_at   | -0.072033406 | 3.520585712 | -0.711997878 | 0.493749987 | 0.493749987 | -5.39388374  |
| 1426369_at   | 0.055725139  | 9.095297896 | 0.711981489  | 0.493759678 | 0.493759678 | -5.393894377 |
| 1457878_at   | -0.055461447 | 4.00963327  | -0.711952401 | 0.493776877 | 0.493776877 | -5.393913255 |
| 1420528_at   | -0.059756767 | 4.997594364 | -0.711937368 | 0.493785766 | 0.493785766 | -5.393923011 |
| 1426789_s_at | 0.046021844  | 10.661018   | 0.711922203  | 0.493794734 | 0.493794734 | -5.393932853 |
| 1438868_at   | -0.048659041 | 5.993463784 | -0.711895497 | 0.493810526 | 0.493810526 | -5.393950184 |
| 1442231_at   | 0.057226646  | 3.749932037 | 0.711876114  | 0.493821988 | 0.493821988 | -5.393962763 |
| 1455833_at   | -0.063215416 | 6.646753487 | -0.711706434 | 0.493922333 | 0.493922333 | -5.394072863 |
| 1457591_at   | 0.08379746   | 5.79270177  | 0.711617613  | 0.493974865 | 0.493974865 | -5.394130487 |
| 1439023_at   | -0.062483988 | 6.718800404 | -0.711561412 | 0.494008106 | 0.494008106 | -5.394166944 |
| 1451806_at   | -0.094180581 | 4.28454061  | -0.711403467 | 0.494101533 | 0.494101533 | -5.39426939  |
| 1428775_at   | -0.07256     | 7.640368445 | -0.711387309 | 0.494111092 | 0.494111092 | -5.39427987  |
| 1453499_at   | -0.043691188 | 3.384077926 | -0.711300047 | 0.494162714 | 0.494162714 | -5.39433646  |
| 1448064_at   | 0.074449079  | 4.545387665 | 0.711223967  | 0.494207723 | 0.494207723 | -5.394385793 |
| 1432921_at   | -0.06093791  | 4.483555596 | -0.711169504 | 0.494239946 | 0.494239946 | -5.394421106 |
| 1437131_x_at | 0.046259031  | 9.329256884 | 0.711169278  | 0.49424008  | 0.49424008  | -5.394421253 |
| 1417793_at   | -0.069349119 | 4.856905779 | -0.711161511 | 0.494244675 | 0.494244675 | -5.394426289 |
| 1437878_s_at | 0.055686631  | 9.90402194  | 0.711137826  | 0.494258689 | 0.494258689 | -5.394441645 |
| 1419909_at   | 0.047037975  | 8.589479645 | 0.711095107  | 0.494283965 | 0.494283965 | -5.394469341 |
| 1450822_at   | 0.052962835  | 3.944985419 | 0.711094733  | 0.494284186 | 0.494284186 | -5.394469583 |
| 1429583_at   | -0.053393081 | 4.879195771 | -0.711084327 | 0.494290343 | 0.494290343 | -5.394476329 |
| 1427980_at   | 0.064907611  | 8.072068155 | 0.710873794  | 0.494414924 | 0.494414924 | -5.3946128   |
| 1439747_at   | -0.060544525 | 6.200611683 | -0.710833025 | 0.49443905  | 0.49443905  | -5.394639222 |
| 1445059_at   | -0.053948954 | 3.677017422 | -0.710777074 | 0.494472163 | 0.494472163 | -5.394675483 |
| 1434791_at   | -0.050171528 | 7.8916397   | -0.710768229 | 0.494477397 | 0.494477397 | -5.394681214 |
| 1432119_at   | -0.074347305 | 3.370963845 | -0.71065514  | 0.49454433  | 0.49454433  | -5.394754496 |
| 1439249_at   | 0.092719284  | 5.929465235 | 0.710625352  | 0.494561961 | 0.494561961 | -5.394773797 |
| 1440097_at   | 0.071475269  | 8.084038146 | 0.710597388  | 0.494578513 | 0.494578513 | -5.394791915 |
| 1442360_at   | 0.054472737  | 6.196747274 | 0.710545802  | 0.494609048 | 0.494609048 | -5.394825337 |
| 1458229_at   | -0.084623067 | 7.364729927 | -0.710510859 | 0.494629732 | 0.494629732 | -5.394847975 |
| 1430337_at   | 0.063106392  | 4.880966352 | 0.710414866  | 0.494686556 | 0.494686556 | -5.394910159 |
| 1454465_at   | -0.053939674 | 4.39545751  | -0.710406182 | 0.494691697 | 0.494691697 | -5.394915784 |
| 1436930_x_at | 0.144447314  | 7.740381251 | 0.710384441  | 0.494704568 | 0.494704568 | -5.394929866 |
| 1450110_at   | -0.101929526 | 6.662406612 | -0.710341348 | 0.49473008  | 0.49473008  | -5.394957778 |
| 1438787_at   | 0.054408236  | 6.124704163 | 0.710191022  | 0.494819081 | 0.494819081 | -5.395055135 |
| 1434684_at   | -0.064513375 | 5.762681284 | -0.710189255 | 0.494820127 | 0.494820127 | -5.395056279 |
| 1454144_a_at | 0.053488211  | 4.569813589 | 0.710138656  | 0.494850087 | 0.494850087 | -5.395089045 |
| 1423460_at   | 0.046358714  | 8.8700711   | 0.710135221  | 0.49485212  | 0.49485212  | -5.395091269 |
| 1443164_at   | 0.072872247  | 4.694470025 | 0.710129967  | 0.494855231 | 0.494855231 | -5.395094672 |
| 1424664_at   | -0.068904536 | 5.60902841  | -0.710051593 | 0.494901639 | 0.494901639 | -5.395145419 |
| 1451724_at   | -0.104663408 | 7.009597092 | -0.710018901 | 0.494920998 | 0.494920998 | -5.395166585 |
| 1439198_at   | -0.068177095 | 7.394935164 | -0.710017355 | 0.494921913 | 0.494921913 | -5.395167586 |
| 1432292_at   | 0.062851261  | 4.149468444 | 0.710009137  | 0.49492678  | 0.49492678  | -5.395172907 |
| 1426921_at   | -0.075791166 | 8.742733471 | -0.709983539 | 0.494941938 | 0.494941938 | -5.395189479 |

|              |              |             |              |             |             |              |
|--------------|--------------|-------------|--------------|-------------|-------------|--------------|
| 1421229_at   | 0.070759068  | 6.246663679 | 0.709975327  | 0.494946801 | 0.494946801 | -5.395194795 |
| 1450181_at   | -0.055850081 | 4.341714906 | -0.709940173 | 0.494967619 | 0.494967619 | -5.395217554 |
| 1423938_at   | 0.054608954  | 5.836281069 | 0.709927304  | 0.49497524  | 0.49497524  | -5.395225885 |
| 1427011_a_at | 0.049802204  | 9.647552044 | 0.709757792  | 0.495075632 | 0.495075632 | -5.39533561  |
| 1424344_s_at | 0.054962361  | 9.403906925 | 0.709680527  | 0.495121395 | 0.495121395 | -5.395385615 |
| 1454976_at   | 0.087280135  | 7.393986656 | 0.709674644  | 0.495124879 | 0.495124879 | -5.395389422 |
| 1438776_x_at | -0.047144771 | 12.48811534 | -0.7096569   | 0.495135389 | 0.495135389 | -5.395400905 |
| 1442104_at   | 0.088374929  | 4.953145094 | 0.709651037  | 0.495138862 | 0.495138862 | -5.395404699 |
| 1449881_a_at | -0.048388879 | 5.435359271 | -0.709638917 | 0.495146042 | 0.495146042 | -5.395412543 |
| 1437734_at   | -0.049593546 | 9.108731905 | -0.709638494 | 0.495146292 | 0.495146292 | -5.395412817 |
| 1430533_a_at | 0.048139348  | 11.06267341 | 0.709605418  | 0.495165884 | 0.495165884 | -5.395434221 |
| 1419650_at   | 0.056801019  | 11.14577278 | 0.7095925    | 0.495173536 | 0.495173536 | -5.39544258  |
| 1418726_a_at | -0.453176956 | 6.773040975 | -0.709520828 | 0.495215992 | 0.495215992 | -5.395488956 |
| 1444356_at   | 0.058260353  | 4.114908776 | 0.709389873  | 0.495293572 | 0.495293572 | -5.395573682 |
| 1435866_s_at | -0.058253731 | 8.486925903 | -0.709366748 | 0.495307272 | 0.495307272 | -5.395588642 |
| 1450239_at   | -0.076663457 | 3.952425436 | -0.709318074 | 0.495336109 | 0.495336109 | -5.395620129 |
| 1440036_x_at | -0.049491805 | 8.349358438 | -0.709291783 | 0.495351686 | 0.495351686 | -5.395637136 |
| 1427805_at   | -0.05350034  | 5.364445181 | -0.709050975 | 0.495494373 | 0.495494373 | -5.395792879 |
| 1436147_at   | -0.04460108  | 3.401670949 | -0.708965572 | 0.495544984 | 0.495544984 | -5.395848102 |
| 1425099_a_at | 0.05759053   | 7.264227012 | 0.708951079  | 0.495553573 | 0.495553573 | -5.395857474 |
| 1456801_at   | 0.059945208  | 3.298479727 | 0.70889698   | 0.495585634 | 0.495585634 | -5.395892452 |
| 1438319_x_at | 0.058637761  | 7.825108247 | 0.708884199  | 0.495593209 | 0.495593209 | -5.395900715 |
| 1449098_a_at | 0.068041159  | 6.8000945   | 0.708879151  | 0.495596201 | 0.495596201 | -5.395903979 |
| 1457168_at   | 0.141033511  | 6.077321085 | 0.708640996  | 0.495737359 | 0.495737359 | -5.396057927 |
| 1432842_s_at | 0.061052854  | 12.19642829 | 0.708632016  | 0.495742683 | 0.495742683 | -5.396063731 |
| 1453468_at   | -0.054281985 | 5.428535819 | -0.708561924 | 0.495784232 | 0.495784232 | -5.396109031 |
| 1417675_a_at | -0.046942475 | 8.377657335 | -0.708464279 | 0.495842119 | 0.495842119 | -5.396172131 |
| 1429053_at   | 0.068794532  | 7.247346    | 0.708457576  | 0.495846093 | 0.495846093 | -5.396176463 |
| 1448412_a_at | -0.068058631 | 8.499460546 | -0.708440562 | 0.49585618  | 0.49585618  | -5.396187457 |
| 1420802_at   | -0.058039648 | 4.402843291 | -0.708407535 | 0.495875761 | 0.495875761 | -5.396208797 |
| 1427752_a_at | -0.073220469 | 3.577369579 | -0.708399721 | 0.495880393 | 0.495880393 | -5.396213846 |
| 1456826_at   | 0.081188474  | 5.431695449 | 0.708313371  | 0.49593159  | 0.49593159  | -5.396269637 |
| 1455887_at   | 0.090164161  | 8.130537263 | 0.708283378  | 0.495949373 | 0.495949373 | -5.396289014 |
| 1426415_a_at | 0.04778468   | 5.500223618 | 0.70824414   | 0.495972639 | 0.495972639 | -5.396314362 |
| 1441323_at   | -0.051613002 | 5.909481842 | -0.708230856 | 0.495980515 | 0.495980515 | -5.396322944 |
| 1451365_at   | 0.067068312  | 7.313677623 | 0.708144364  | 0.496031803 | 0.496031803 | -5.396378814 |
| 1435269_at   | -0.046309308 | 6.891068398 | -0.707994101 | 0.496120912 | 0.496120912 | -5.396475864 |
| 1443232_at   | -0.06237593  | 4.607348485 | -0.707988357 | 0.496124318 | 0.496124318 | -5.396479573 |
| 1421839_at   | -0.054803791 | 8.237616447 | -0.707946934 | 0.496148885 | 0.496148885 | -5.396506323 |
| 1426589_at   | -0.055948684 | 4.069191543 | -0.707925008 | 0.496161889 | 0.496161889 | -5.396520482 |
| 1418212_at   | -0.046022396 | 6.369180552 | -0.707924437 | 0.496162228 | 0.496162228 | -5.396520851 |
| 1446475_at   | -0.045302329 | 7.177247526 | -0.70791579  | 0.496167356 | 0.496167356 | -5.396526434 |
| 1443753_at   | 0.070866173  | 3.806489817 | 0.707914997  | 0.496167826 | 0.496167826 | -5.396526947 |
| 1441099_at   | -0.084616045 | 5.775719814 | -0.707868552 | 0.496195373 | 0.496195373 | -5.396556937 |
| 1451981_at   | -0.051181853 | 7.227453381 | -0.707835616 | 0.496214908 | 0.496214908 | -5.396578204 |
| 1444999_at   | 0.059150748  | 4.343650293 | 0.707826718  | 0.496220185 | 0.496220185 | -5.396583949 |
| 1459607_at   | -0.055981024 | 3.836488309 | -0.707782412 | 0.496246465 | 0.496246465 | -5.396612555 |
| 1435274_at   | 0.079630817  | 8.12231017  | 0.7077707    | 0.496253412 | 0.496253412 | -5.396620117 |
| 1451081_a_at | 0.054372214  | 9.562952731 | 0.707681145  | 0.496306534 | 0.496306534 | -5.396677932 |
| 1432868_at   | 0.048074498  | 6.042067652 | 0.707653217  | 0.496323101 | 0.496323101 | -5.396695961 |
| 1455522_at   | -0.053825283 | 6.452236213 | -0.707607236 | 0.496350378 | 0.496350378 | -5.396725642 |
| 1423764_s_at | 0.044642608  | 8.426775611 | 0.70758712   | 0.496362311 | 0.496362311 | -5.396738626 |
| 1460242_at   | -0.132305178 | 6.483883999 | -0.707563862 | 0.496376108 | 0.496376108 | -5.396753639 |

|              |              |             |              |             |             |              |
|--------------|--------------|-------------|--------------|-------------|-------------|--------------|
| 1450456_at   | -0.089837044 | 4.474578925 | -0.707532461 | 0.496394737 | 0.496394737 | -5.396773906 |
| 1428075_at   | 0.046210606  | 10.26978758 | 0.707525086  | 0.496399112 | 0.496399112 | -5.396778666 |
| 1446918_at   | -0.063483868 | 5.356095262 | -0.707510728 | 0.496407631 | 0.496407631 | -5.396787933 |
| 1427907_at   | 0.056592779  | 8.422943247 | 0.707508011  | 0.496409242 | 0.496409242 | -5.396789687 |
| 1434657_at   | 0.066058857  | 7.669912857 | 0.707474897  | 0.496428888 | 0.496428888 | -5.396811058 |
| 1454933_at   | -0.057239956 | 9.782530251 | -0.707435092 | 0.496452504 | 0.496452504 | -5.396836748 |
| 1420189_at   | 0.059210262  | 3.501228065 | 0.707426154  | 0.496457808 | 0.496457808 | -5.396842516 |
| 1440092_at   | 0.056892951  | 8.538364577 | 0.707368769  | 0.496491855 | 0.496491855 | -5.396879547 |
| 1422885_at   | -0.066288356 | 6.43100073  | -0.707337773 | 0.496510246 | 0.496510246 | -5.396899549 |
| 1443293_at   | -0.081605024 | 5.098309418 | -0.707296337 | 0.496534832 | 0.496534832 | -5.396926285 |
| 1420371_at   | 0.104344737  | 6.762561257 | 0.707291092  | 0.496537944 | 0.496537944 | -5.39692967  |
| 1417619_at   | 0.064800419  | 7.2716891   | 0.707261935  | 0.496555245 | 0.496555245 | -5.396948483 |
| 1456031_at   | 0.057067807  | 3.298381666 | 0.707203035  | 0.496590196 | 0.496590196 | -5.396986484 |
| 1435422_at   | 0.045996557  | 7.149299488 | 0.707179892  | 0.496603929 | 0.496603929 | -5.397001415 |
| 1454284_at   | -0.087245909 | 6.160585673 | -0.707037444 | 0.496688465 | 0.496688465 | -5.397093307 |
| 1449984_at   | 0.075749366  | 3.507280931 | 0.706985683  | 0.496719184 | 0.496719184 | -5.397126693 |
| 1419284_at   | -0.064602021 | 3.924219725 | -0.70692903  | 0.496752808 | 0.496752808 | -5.397163232 |
| 1460110_at   | 0.053122447  | 4.100320682 | 0.706911985  | 0.496762925 | 0.496762925 | -5.397174225 |
| 1453983_a_at | 0.050836989  | 7.930777593 | 0.706785245  | 0.496838153 | 0.496838153 | -5.397255957 |
| 1424470_a_at | -0.084936782 | 4.749581803 | -0.706717926 | 0.496878114 | 0.496878114 | -5.397299364 |
| 1448468_a_at | -0.055307475 | 4.615688607 | -0.706709929 | 0.496882861 | 0.496882861 | -5.39730452  |
| 1420524_a_at | -0.068081517 | 5.653345734 | -0.706689552 | 0.496894957 | 0.496894957 | -5.397317659 |
| 1459805_x_at | 0.050646419  | 8.945948614 | 0.706677215  | 0.496902281 | 0.496902281 | -5.397325613 |
| 1436069_at   | 0.051441305  | 8.141436217 | 0.706641323  | 0.496923588 | 0.496923588 | -5.397348753 |
| 1427061_at   | 0.054098661  | 9.007422872 | 0.706586589  | 0.496956082 | 0.496956082 | -5.39738404  |
| 1420741_x_at | -0.054764606 | 7.254707799 | -0.70658548  | 0.49695674  | 0.49695674  | -5.397384755 |
| 1431042_at   | 0.055297244  | 5.205099348 | 0.706571758  | 0.496964886 | 0.496964886 | -5.397393601 |
| 1429052_at   | -0.054032415 | 10.97711216 | -0.70646186  | 0.497030134 | 0.497030134 | -5.397464442 |
| 1416955_at   | -0.048247968 | 7.070850609 | -0.706448441 | 0.497038101 | 0.497038101 | -5.397473092 |
| 1436073_at   | 0.049600139  | 8.611182346 | 0.706441355  | 0.497042308 | 0.497042308 | -5.397477659 |
| 1434108_at   | 0.08523492   | 9.148040592 | 0.706399044  | 0.497067431 | 0.497067431 | -5.39750493  |
| 1455113_at   | 0.064971748  | 7.113919134 | 0.706384459  | 0.49707609  | 0.49707609  | -5.39751433  |
| 1419810_x_at | 0.053347802  | 3.636418053 | 0.706296274  | 0.497128453 | 0.497128453 | -5.397571162 |
| 1441160_at   | 0.055469224  | 3.892566363 | 0.706284091  | 0.497135688 | 0.497135688 | -5.397579013 |
| 1434631_at   | -0.047107479 | 6.993351573 | -0.706259307 | 0.497150404 | 0.497150404 | -5.397594984 |
| 1446699_at   | -0.054589932 | 3.700869011 | -0.706247601 | 0.497157356 | 0.497157356 | -5.397602527 |
| 1419864_x_at | -0.057045031 | 4.5494099   | -0.706125044 | 0.497230137 | 0.497230137 | -5.397681497 |
| 1437243_at   | -0.054422576 | 6.142255393 | -0.706102477 | 0.497243539 | 0.497243539 | -5.397696036 |
| 1425102_a_at | -0.047346057 | 3.62562432  | -0.706082296 | 0.497255524 | 0.497255524 | -5.397709038 |
| 1451582_at   | 0.064615572  | 5.761952192 | 0.705980725  | 0.497315849 | 0.497315849 | -5.397774472 |
| 1459896_at   | -0.076657229 | 7.103673606 | -0.705904476 | 0.497361138 | 0.497361138 | -5.397823587 |
| 1419832_s_at | 0.050417385  | 3.918835545 | 0.705856993  | 0.497389343 | 0.497389343 | -5.397854171 |
| 1444640_at   | -0.055178526 | 5.552010922 | -0.705818136 | 0.497412424 | 0.497412424 | -5.397879197 |
| 1439299_at   | -0.141832177 | 6.055016429 | -0.705767233 | 0.497442661 | 0.497442661 | -5.39791198  |
| 1421130_at   | -0.054415087 | 5.273220425 | -0.705759174 | 0.497447449 | 0.497447449 | -5.39791717  |
| 1420107_at   | -0.068616159 | 5.781544894 | -0.705734904 | 0.497461867 | 0.497461867 | -5.3979328   |
| 1424188_at   | 0.049177364  | 9.925071209 | 0.705712056  | 0.497475439 | 0.497475439 | -5.397947513 |
| 1421372_at   | -0.045419384 | 3.345686419 | -0.705692457 | 0.497487083 | 0.497487083 | -5.397960134 |
| 1432394_a_at | -0.047320523 | 8.140423316 | -0.705669244 | 0.497500873 | 0.497500873 | -5.397975082 |
| 1449185_at   | 0.096703619  | 4.84103193  | 0.705637254  | 0.497519877 | 0.497519877 | -5.39799568  |
| 1435856_x_at | 0.077665954  | 7.433471978 | 0.705626411  | 0.497526319 | 0.497526319 | -5.398002662 |
| 1447594_at   | -0.056664457 | 4.313602378 | -0.705587061 | 0.497549698 | 0.497549698 | -5.398027998 |
| 1455598_at   | 0.051790235  | 7.635585395 | 0.705585826  | 0.497550431 | 0.497550431 | -5.398028794 |

|              |              |             |              |             |             |              |
|--------------|--------------|-------------|--------------|-------------|-------------|--------------|
| 1433026_at   | 0.047147758  | 4.932906204 | 0.705585066  | 0.497550883 | 0.497550883 | -5.398029283 |
| 1452970_at   | 0.043174702  | 9.703810843 | 0.705557684  | 0.497567151 | 0.497567151 | -5.398046913 |
| 1431988_at   | -0.063416122 | 3.637544061 | -0.705514591 | 0.497592755 | 0.497592755 | -5.398074657 |
| 1432925_at   | -0.065105448 | 4.191167064 | -0.705497519 | 0.497602898 | 0.497602898 | -5.398085648 |
| 1460310_a_at | 0.06692263   | 5.559749768 | 0.705456781  | 0.497627103 | 0.497627103 | -5.398111874 |
| 1420842_at   | 0.06058761   | 10.81746311 | 0.705410199  | 0.497654781 | 0.497654781 | -5.39814186  |
| 1459811_at   | 0.064535369  | 3.660678598 | 0.705382648  | 0.497671152 | 0.497671152 | -5.398159594 |
| 1433213_at   | -0.048702221 | 3.287060751 | -0.70537296  | 0.497676909 | 0.497676909 | -5.398165831 |
| 1439024_at   | 0.068371657  | 7.514216885 | 0.705319668  | 0.497708576 | 0.497708576 | -5.398200133 |
| 1447018_at   | -0.069863445 | 4.455299662 | -0.705209088 | 0.497774289 | 0.497774289 | -5.398271302 |
| 1446501_at   | -0.046339854 | 4.519114964 | -0.705206109 | 0.497776059 | 0.497776059 | -5.398273219 |
| 1433896_at   | 0.082983356  | 6.030707235 | 0.705205543  | 0.497776396 | 0.497776396 | -5.398273583 |
| 1438165_x_at | -0.083626091 | 6.730283602 | -0.705158078 | 0.497804604 | 0.497804604 | -5.398304128 |
| 1427808_at   | 0.056728513  | 4.516502543 | 0.705149598  | 0.497809644 | 0.497809644 | -5.398309585 |
| 1416895_at   | 0.056488262  | 8.104027241 | 0.705100033  | 0.497839101 | 0.497839101 | -5.39834148  |
| 1444165_at   | -0.070826471 | 5.649114029 | -0.705095511 | 0.497841789 | 0.497841789 | -5.39834439  |
| 1441076_at   | 0.061449543  | 5.166918065 | 0.705089977  | 0.497845078 | 0.497845078 | -5.39834795  |
| 1416809_at   | -0.065096297 | 3.413531982 | -0.705085036 | 0.497848015 | 0.497848015 | -5.39835113  |
| 1417199_at   | 0.044325081  | 8.745785778 | 0.705059904  | 0.497862951 | 0.497862951 | -5.3983673   |
| 1433634_at   | -0.074790825 | 9.466794195 | -0.70503425  | 0.497878199 | 0.497878199 | -5.398383807 |
| 1418816_at   | -0.074268983 | 7.370158596 | -0.705011888 | 0.49789149  | 0.49789149  | -5.398398195 |
| 1432525_at   | 0.068443503  | 4.413783002 | 0.704926505  | 0.497942241 | 0.497942241 | -5.398453126 |
| 1421336_at   | 0.051217286  | 3.698946454 | 0.704916389  | 0.497948254 | 0.497948254 | -5.398459634 |
| 1450406_a_at | -0.059798233 | 8.078894262 | -0.704899163 | 0.497958493 | 0.497958493 | -5.398470716 |
| 1439565_at   | -0.061947614 | 8.076891236 | -0.704837558 | 0.497995113 | 0.497995113 | -5.398510345 |
| 1454853_s_at | -0.051033314 | 7.169962146 | -0.704782757 | 0.49802769  | 0.49802769  | -5.398545595 |
| 1443548_at   | -0.051831953 | 3.193561293 | -0.70475959  | 0.498041462 | 0.498041462 | -5.398560496 |
| 1427279_at   | -0.073709035 | 6.345773315 | -0.704710799 | 0.498070468 | 0.498070468 | -5.398591877 |
| 1440604_at   | 0.068913638  | 6.970713204 | 0.704666474  | 0.49809682  | 0.49809682  | -5.398620384 |
| 1426222_s_at | -0.051114867 | 3.942393461 | -0.704632698 | 0.498116901 | 0.498116901 | -5.398642105 |
| 1445858_at   | -0.084284317 | 4.94827659  | -0.704568369 | 0.498155148 | 0.498155148 | -5.398683472 |
| 1429408_at   | -0.05426143  | 3.412318432 | -0.704566806 | 0.498156077 | 0.498156077 | -5.398684477 |
| 1431121_at   | 0.052429747  | 6.531708293 | 0.704558665  | 0.498160917 | 0.498160917 | -5.398689712 |
| 1443612_at   | 0.055952844  | 3.278657322 | 0.704535206  | 0.498174865 | 0.498174865 | -5.398704797 |
| 1436832_at   | -0.061614432 | 6.518183333 | -0.704515262 | 0.498186724 | 0.498186724 | -5.398717621 |
| 1425283_a_at | 0.070441328  | 5.288550316 | 0.70449835   | 0.49819678  | 0.49819678  | -5.398728495 |
| 1458242_at   | 0.054291358  | 3.457089762 | 0.704476954  | 0.498209502 | 0.498209502 | -5.398742252 |
| 1418427_at   | 0.059462175  | 9.964088233 | 0.704429793  | 0.498237544 | 0.498237544 | -5.398772573 |
| 1460701_a_at | 0.054876953  | 10.37179911 | 0.704351443  | 0.498284135 | 0.498284135 | -5.398822944 |
| 1431938_a_at | -0.046848061 | 8.41297608  | -0.70420882  | 0.498368952 | 0.498368952 | -5.398914623 |
| 1426571_at   | -0.088367127 | 7.360533284 | -0.704165176 | 0.498394908 | 0.498394908 | -5.398942673 |
| 1457137_at   | 0.052165116  | 3.845888089 | 0.704124684  | 0.49841899  | 0.49841899  | -5.398968697 |
| 1438547_x_at | 0.083037317  | 7.628415131 | 0.704120745  | 0.498421333 | 0.498421333 | -5.398971229 |
| 1434752_at   | 0.0975194    | 7.734325474 | 0.704120615  | 0.498421411 | 0.498421411 | -5.398971312 |
| 1453743_x_at | -0.057296894 | 7.002691823 | -0.704098393 | 0.498434628 | 0.498434628 | -5.398985594 |
| 1427952_at   | 0.054010339  | 5.793392244 | 0.704076921  | 0.498447399 | 0.498447399 | -5.398999392 |
| 1440270_at   | -0.074095047 | 4.439581962 | -0.704019904 | 0.498481312 | 0.498481312 | -5.399036033 |
| 1425013_at   | -0.070815407 | 3.695742171 | -0.70401272  | 0.498485585 | 0.498485585 | -5.399040649 |
| 1418355_at   | -0.093487506 | 8.686764728 | -0.703985606 | 0.498501713 | 0.498501713 | -5.399058071 |
| 1437915_at   | -0.063710032 | 3.743889602 | -0.703973022 | 0.498509198 | 0.498509198 | -5.399066157 |
| 1429057_at   | -0.056382625 | 8.224029146 | -0.703953236 | 0.498520967 | 0.498520967 | -5.399078871 |
| 1416253_at   | 0.048390498  | 8.973525035 | 0.703907907  | 0.498547932 | 0.498547932 | -5.399107996 |
| 1421827_at   | -0.051201185 | 5.577178146 | -0.703899686 | 0.498552822 | 0.498552822 | -5.399113278 |

|              |              |             |              |             |             |              |
|--------------|--------------|-------------|--------------|-------------|-------------|--------------|
| 1457701_at   | 0.068270215  | 7.10326891  | 0.703874275  | 0.498567938 | 0.498567938 | -5.399129604 |
| 1458620_at   | -0.068356341 | 3.75791583  | -0.703863115 | 0.498574577 | 0.498574577 | -5.399136774 |
| 1417937_at   | 0.045494052  | 10.1616953  | 0.703840554  | 0.498587998 | 0.498587998 | -5.399151268 |
| 1443754_x_at | -0.054723571 | 3.590155217 | -0.703826445 | 0.498596391 | 0.498596391 | -5.399160332 |
| 1456445_at   | 0.052416484  | 4.339940904 | 0.703788842  | 0.498618761 | 0.498618761 | -5.399184489 |
| 1454141_at   | -0.076066721 | 4.331918443 | -0.703786131 | 0.498620374 | 0.498620374 | -5.39918623  |
| 1459401_at   | 0.101293728  | 5.16615876  | 0.70374209   | 0.498646575 | 0.498646575 | -5.399214522 |
| 1442503_at   | 0.055941014  | 3.777799157 | 0.7037293    | 0.498654184 | 0.498654184 | -5.399222738 |
| 1438620_x_at | 0.075030483  | 7.734999821 | 0.703705062  | 0.498668604 | 0.498668604 | -5.399238306 |
| 1449463_at   | -0.059731331 | 4.259489957 | -0.703679971 | 0.498683532 | 0.498683532 | -5.399254423 |
| 1455769_at   | 0.065204117  | 4.118507005 | 0.703676661  | 0.498685501 | 0.498685501 | -5.399256549 |
| 1444865_at   | 0.05972663   | 3.395904624 | 0.703613452  | 0.498723109 | 0.498723109 | -5.399297148 |
| 1438332_at   | -0.051837048 | 3.401504434 | -0.703595642 | 0.498733706 | 0.498733706 | -5.399308586 |
| 1424577_at   | 0.063863426  | 7.281227905 | 0.703537633  | 0.498768221 | 0.498768221 | -5.399345841 |
| 1430793_at   | -0.0509448   | 3.275781741 | -0.703532522 | 0.498771262 | 0.498771262 | -5.399349123 |
| 1447656_at   | -0.06634601  | 3.426844212 | -0.70350192  | 0.498789471 | 0.498789471 | -5.399368775 |
| 1437676_at   | 0.094109167  | 5.827759807 | 0.703381412  | 0.498861181 | 0.498861181 | -5.399446156 |
| 1447424_at   | 0.042913793  | 3.637265922 | 0.703368318  | 0.498868973 | 0.498868973 | -5.399454564 |
| 1418466_at   | 0.061719573  | 4.587353262 | 0.703327405  | 0.498893321 | 0.498893321 | -5.399480832 |
| 1420021_s_at | 0.055022327  | 9.685065224 | 0.703296516  | 0.498911703 | 0.498911703 | -5.399500663 |
| 1437054_x_at | -0.057503793 | 3.12846013  | -0.703289847 | 0.498915672 | 0.498915672 | -5.399504944 |
| 1418557_s_at | 0.082673294  | 3.771192093 | 0.703284462  | 0.498918877 | 0.498918877 | -5.399508402 |
| 1429339_a_at | 0.083214396  | 5.15269436  | 0.703280791  | 0.498921062 | 0.498921062 | -5.399510758 |
| 1426350_at   | 0.079211021  | 7.651504752 | 0.703197877  | 0.498970407 | 0.498970407 | -5.399563985 |
| 1423166_at   | 0.082481998  | 4.985073034 | 0.703118699  | 0.499017533 | 0.499017533 | -5.399614809 |
| 1449548_at   | 0.060412591  | 6.892687805 | 0.703099416  | 0.499029011 | 0.499029011 | -5.399627186 |
| 1419959_s_at | -0.051868947 | 3.312792608 | -0.703062891 | 0.499050751 | 0.499050751 | -5.399650629 |
| 1442210_at   | -0.054452589 | 3.810261988 | -0.703001541 | 0.499087269 | 0.499087269 | -5.399690003 |
| 1431560_at   | 0.071054732  | 5.165792037 | 0.702996405  | 0.499090326 | 0.499090326 | -5.399693299 |
| 1418438_at   | -0.049742615 | 3.389827983 | -0.702989898 | 0.4990942   | 0.4990942   | -5.399697475 |
| 1444893_at   | -0.048563109 | 5.191419738 | -0.702957267 | 0.499113624 | 0.499113624 | -5.399718416 |
| 1417768_at   | -0.053557826 | 9.138953709 | -0.702945081 | 0.499120878 | 0.499120878 | -5.399726236 |
| 1432433_at   | 0.047781417  | 3.639341897 | 0.702925029  | 0.499132815 | 0.499132815 | -5.399739104 |
| 1446987_at   | 0.074624156  | 4.558235568 | 0.702897151  | 0.49914941  | 0.49914941  | -5.399756993 |
| 1457821_at   | 0.067250209  | 4.952238766 | 0.702886065  | 0.49915601  | 0.49915601  | -5.399764106 |
| 1420536_at   | -0.063560774 | 5.972606908 | -0.702879378 | 0.499159991 | 0.499159991 | -5.399768397 |
| 1459620_at   | -0.05403241  | 3.313657261 | -0.702857579 | 0.499172968 | 0.499172968 | -5.399782385 |
| 1431794_at   | -0.057775057 | 4.271840925 | -0.702825779 | 0.499191899 | 0.499191899 | -5.399802789 |
| 1450283_at   | 0.054752664  | 3.977360001 | 0.70273357   | 0.499246796 | 0.499246796 | -5.399861949 |
| 1420334_at   | 0.052943398  | 3.93606767  | 0.702680326  | 0.499278497 | 0.499278497 | -5.399896106 |
| 1427608_a_at | -0.062021706 | 3.990325869 | -0.702657268 | 0.499292225 | 0.499292225 | -5.399910898 |
| 1429071_at   | -0.086411432 | 4.577892444 | -0.702644012 | 0.499300118 | 0.499300118 | -5.399919401 |
| 1443102_at   | 0.042922416  | 3.675738319 | 0.702597038  | 0.499328087 | 0.499328087 | -5.399949533 |
| 1426115_a_at | 0.054157038  | 4.030896541 | 0.702588613  | 0.499333104 | 0.499333104 | -5.399954937 |
| 1437858_at   | 0.123939564  | 6.598026095 | 0.702586299  | 0.499334482 | 0.499334482 | -5.399956422 |
| 1441541_at   | 0.113715647  | 4.772934478 | 0.702577567  | 0.499339681 | 0.499339681 | -5.399962023 |
| 1416166_a_at | -0.143339066 | 8.669027994 | -0.70241868  | 0.499434294 | 0.499434294 | -5.400063926 |
| 1431293_a_at | -0.094140211 | 9.725856573 | -0.702388986 | 0.499451978 | 0.499451978 | -5.400082968 |
| 1450912_at   | 0.043252773  | 3.023349707 | 0.702362515  | 0.499467742 | 0.499467742 | -5.400099943 |
| 1421705_at   | 0.057885653  | 3.688164633 | 0.702202527  | 0.499563026 | 0.499563026 | -5.400202525 |
| 1444655_at   | 0.04846997   | 4.171675494 | 0.702189176  | 0.499570978 | 0.499570978 | -5.400211084 |
| 1452654_at   | 0.070301762  | 7.160949734 | 0.702169072  | 0.499582952 | 0.499582952 | -5.400223973 |
| 1434014_at   | 0.082190809  | 6.69265186  | 0.702124322  | 0.499609607 | 0.499609607 | -5.400252661 |

|              |              |             |              |             |             |              |
|--------------|--------------|-------------|--------------|-------------|-------------|--------------|
| 1442314_at   | 0.066335193  | 4.543710024 | 0.702110712  | 0.499617713 | 0.499617713 | -5.400261386 |
| 1427269_at   | 0.06674693   | 9.324288833 | 0.701987544  | 0.499691081 | 0.499691081 | -5.400340336 |
| 1416006_at   | -0.044030513 | 12.51354694 | -0.701963998 | 0.499705108 | 0.499705108 | -5.400355427 |
| 1442947_x_at | 0.067500039  | 3.594141542 | 0.701955752  | 0.49971002  | 0.49971002  | -5.400360712 |
| 1443774_at   | -0.070612449 | 3.623347578 | -0.701946318 | 0.49971564  | 0.49971564  | -5.400366759 |
| 1422897_at   | -0.056741767 | 6.792247575 | -0.701896548 | 0.499745289 | 0.499745289 | -5.400398656 |
| 1425814_a_at | 0.055871426  | 6.970880122 | 0.701887382  | 0.49975075  | 0.49975075  | -5.40040453  |
| 1420183_at   | 0.0767811    | 5.843867804 | 0.701883303  | 0.499753181 | 0.499753181 | -5.400407144 |
| 1420703_at   | -0.060482066 | 8.085899607 | -0.701877904 | 0.499756397 | 0.499756397 | -5.400410604 |
| 1449481_at   | -0.055552545 | 7.827156625 | -0.70185625  | 0.499769297 | 0.499769297 | -5.400424481 |
| 1430827_a_at | 0.059036882  | 4.342085368 | 0.7018196    | 0.499791132 | 0.499791132 | -5.400447968 |
| 1428918_at   | -0.057480028 | 7.535894805 | -0.701791574 | 0.499807829 | 0.499807829 | -5.400465926 |
| 1424709_at   | 0.069699858  | 5.916911488 | 0.701776692  | 0.499816696 | 0.499816696 | -5.400475462 |
| 1429141_at   | -0.055171887 | 7.132615132 | -0.701749774 | 0.499832734 | 0.499832734 | -5.40049271  |
| 1415830_at   | 0.055311069  | 8.361758429 | 0.70166822   | 0.499881325 | 0.499881325 | -5.400544963 |
| 1437158_at   | 0.045947342  | 9.576804034 | 0.701657347  | 0.499887804 | 0.499887804 | -5.40055193  |
| 1416785_at   | 0.063002587  | 5.178000995 | 0.701615629  | 0.499912662 | 0.499912662 | -5.400578657 |
| 1442680_at   | -0.072951762 | 7.419815493 | -0.701600816 | 0.499921488 | 0.499921488 | -5.400588146 |
| 1438457_at   | -0.048349053 | 3.759670005 | -0.701579208 | 0.499934364 | 0.499934364 | -5.400601989 |
| 1435066_at   | -0.050542077 | 8.036806247 | -0.70156718  | 0.499941531 | 0.499941531 | -5.400609694 |
| 1447700_x_at | -0.051255491 | 7.281453043 | -0.701559535 | 0.499946087 | 0.499946087 | -5.400614592 |
| 1459231_at   | -0.069238804 | 4.010804069 | -0.7014872   | 0.499989191 | 0.499989191 | -5.400660927 |
| 1453913_a_at | -0.058188046 | 5.428638084 | -0.701444702 | 0.500014517 | 0.500014517 | -5.400688148 |
| 1453824_at   | -0.069142451 | 7.364032467 | -0.701414346 | 0.500032608 | 0.500032608 | -5.400707591 |
| 1430220_at   | 0.137508288  | 6.865754353 | 0.701394286  | 0.500044563 | 0.500044563 | -5.400720439 |
| 1450877_at   | -0.043503382 | 10.64926254 | -0.701344119 | 0.500074461 | 0.500074461 | -5.400752568 |
| 1428977_at   | -0.063218484 | 5.734776569 | -0.701296577 | 0.500102796 | 0.500102796 | -5.400783014 |
| 1432619_at   | 0.064333141  | 4.098725495 | 0.701220188  | 0.500148325 | 0.500148325 | -5.40083193  |
| 1418976_s_at | 0.053675466  | 5.249591406 | 0.701214214  | 0.500151886 | 0.500151886 | -5.400835756 |
| 1421298_a_at | 0.050556288  | 5.363729276 | 0.70117909   | 0.500172821 | 0.500172821 | -5.400858245 |
| 1434747_at   | -0.059415522 | 4.264272603 | -0.70110269  | 0.500218362 | 0.500218362 | -5.400907162 |
| 1453611_at   | 0.060585089  | 5.462015977 | 0.701042893  | 0.500254006 | 0.500254006 | -5.400945443 |
| 1455333_at   | 0.049908428  | 10.8522912  | 0.701020365  | 0.500267436 | 0.500267436 | -5.400959865 |
| 1442071_at   | 0.07795699   | 6.693927812 | 0.700862157  | 0.500361753 | 0.500361753 | -5.401061134 |
| 1455951_at   | 0.05791403   | 9.413465475 | 0.700801705  | 0.500397795 | 0.500397795 | -5.401099824 |
| 1434933_at   | -0.043603117 | 8.374327323 | -0.700780278 | 0.50041057  | 0.50041057  | -5.401113536 |
| 1450443_at   | -0.045684915 | 4.058867898 | -0.70067785  | 0.500471644 | 0.500471644 | -5.401179083 |
| 1425824_a_at | 0.056759805  | 5.803182754 | 0.700637518  | 0.500495693 | 0.500495693 | -5.40120489  |
| 1434279_at   | -0.126595211 | 8.220688515 | -0.70060238  | 0.500516646 | 0.500516646 | -5.401227372 |
| 1460572_a_at | 0.044735278  | 6.806441924 | 0.700590504  | 0.500523727 | 0.500523727 | -5.401234971 |
| 1449696_at   | -0.0547155   | 5.22947105  | -0.700562052 | 0.500540694 | 0.500540694 | -5.401253174 |
| 1433335_at   | 0.044954906  | 3.379278141 | 0.700547916  | 0.500549124 | 0.500549124 | -5.401262218 |
| 1416790_a_at | 0.081942579  | 10.04442871 | 0.700502748  | 0.500576059 | 0.500576059 | -5.401291115 |
| 1446527_at   | -0.068630892 | 4.048466548 | -0.700502419 | 0.500576256 | 0.500576256 | -5.401291325 |
| 1447216_at   | -0.062930788 | 5.508284539 | -0.700483804 | 0.500587357 | 0.500587357 | -5.401303234 |
| 1452924_at   | 0.05058808   | 7.357340091 | 0.700437952  | 0.500614701 | 0.500614701 | -5.401332566 |
| 1431954_x_at | 0.055387897  | 3.357000209 | 0.70037728   | 0.500650886 | 0.500650886 | -5.401371376 |
| 1452136_at   | -0.065934705 | 4.509874759 | -0.700346573 | 0.5006692   | 0.5006692   | -5.401391017 |
| 1440206_at   | -0.060581389 | 4.887424591 | -0.700334601 | 0.500676341 | 0.500676341 | -5.401398674 |
| 1443279_at   | 0.063610633  | 5.349635671 | 0.700304076  | 0.500694547 | 0.500694547 | -5.401418198 |
| 1454350_at   | -0.066274205 | 7.820123535 | -0.700179629 | 0.500768775 | 0.500768775 | -5.401497785 |
| 1419388_at   | -0.071747637 | 3.736165682 | -0.70005347  | 0.500844032 | 0.500844032 | -5.401578455 |
| 1431611_a_at | -0.086801074 | 7.789756036 | -0.700050139 | 0.500846019 | 0.500846019 | -5.401580585 |



|              |              |             |              |             |             |              |
|--------------|--------------|-------------|--------------|-------------|-------------|--------------|
| 1420396_at   | -0.058062966 | 5.017566439 | -0.700043367 | 0.500850059 | 0.500850059 | -5.401584915 |
| 1452409_at   | 0.061117871  | 6.512263712 | 0.700018565  | 0.500864855 | 0.500864855 | -5.401600772 |
| 1417641_at   | -0.051766534 | 3.524930999 | -0.700014395 | 0.500867342 | 0.500867342 | -5.401603438 |
| 1436255_at   | -0.049299306 | 4.902539113 | -0.699972693 | 0.500892221 | 0.500892221 | -5.4016301   |
| 1422690_at   | 0.053401497  | 9.292297663 | 0.699933091  | 0.500915847 | 0.500915847 | -5.401655416 |
| 1418923_at   | -0.06420162  | 3.903714783 | -0.699921115 | 0.500922992 | 0.500922992 | -5.401663073 |
| 1439320_at   | -0.071211077 | 5.520262954 | -0.699858517 | 0.500960339 | 0.500960339 | -5.401703088 |
| 1440143_at   | -0.049618632 | 6.070811559 | -0.699850307 | 0.500965238 | 0.500965238 | -5.401708336 |
| 1456704_at   | -0.068739642 | 5.994566616 | -0.699836255 | 0.500973622 | 0.500973622 | -5.401717318 |
| 1443178_at   | 0.065190722  | 3.996022304 | 0.699824398  | 0.500980696 | 0.500980696 | -5.401724897 |
| 1417445_at   | 0.055459539  | 7.826186157 | 0.699805899  | 0.500991734 | 0.500991734 | -5.401736721 |
| 1450096_at   | 0.057743629  | 3.834165196 | 0.699744034  | 0.501028647 | 0.501028647 | -5.401776262 |
| 1460063_at   | -0.086656709 | 8.269611591 | -0.699731922 | 0.501035874 | 0.501035874 | -5.401784004 |
| 1459225_at   | 0.067353845  | 6.232244733 | 0.699663519  | 0.501076691 | 0.501076691 | -5.401827719 |
| 1417045_at   | 0.044077346  | 6.815939832 | 0.69963158   | 0.501095749 | 0.501095749 | -5.401848129 |
| 1458222_at   | -0.043078572 | 7.371359604 | -0.699591942 | 0.501119404 | 0.501119404 | -5.401873459 |
| 1443995_at   | -0.073581853 | 3.953715962 | -0.699575074 | 0.501129469 | 0.501129469 | -5.401884238 |
| 1449245_at   | -0.055483983 | 4.304444339 | -0.699560142 | 0.50113838  | 0.50113838  | -5.401893779 |
| 1457007_at   | -0.081050326 | 7.55725286  | -0.699532573 | 0.501154832 | 0.501154832 | -5.401911394 |
| 1433616_a_at | -0.049761957 | 10.41623494 | -0.699517445 | 0.501163861 | 0.501163861 | -5.401921061 |
| 1437654_at   | 0.051547088  | 7.27031092  | 0.699485648  | 0.501182837 | 0.501182837 | -5.401941376 |
| 1453659_at   | -0.068016051 | 4.205726932 | -0.699485289 | 0.501183051 | 0.501183051 | -5.401941606 |
| 1438522_at   | 0.074019193  | 4.217601643 | 0.699441593  | 0.501209129 | 0.501209129 | -5.401969523 |
| 1428542_at   | -0.048702966 | 8.605051894 | -0.699400118 | 0.501233883 | 0.501233883 | -5.40199602  |
| 1426372_a_at | -0.054043181 | 8.808267224 | -0.699340016 | 0.501269755 | 0.501269755 | -5.402034415 |
| 1419047_at   | 0.056408947  | 8.647163999 | 0.699324403  | 0.501279074 | 0.501279074 | -5.402044388 |
| 1445046_at   | 0.058016893  | 4.936459486 | 0.699322056  | 0.501280475 | 0.501280475 | -5.402045888 |
| 1429122_a_at | 0.048595593  | 7.645260136 | 0.699287344  | 0.501301193 | 0.501301193 | -5.402068061 |
| 1460029_at   | 0.048848229  | 6.279616126 | 0.699224322  | 0.501338811 | 0.501338811 | -5.402108314 |
| 1415861_at   | -0.04446382  | 3.575512    | -0.699192891 | 0.501357573 | 0.501357573 | -5.402128389 |
| 1432792_at   | 0.054620496  | 3.420956996 | 0.699085405  | 0.501421737 | 0.501421737 | -5.402197034 |
| 1454638_a_at | 0.054238631  | 3.74937906  | 0.699025968  | 0.50145722  | 0.50145722  | -5.402234988 |
| 1447913_x_at | 0.084224267  | 3.537170405 | 0.699008828  | 0.501467453 | 0.501467453 | -5.402245933 |
| 1451035_a_at | 0.053893428  | 12.08302187 | 0.69894074   | 0.501508103 | 0.501508103 | -5.402289407 |
| 1459691_at   | -0.090171827 | 6.591125433 | -0.698928654 | 0.501515319 | 0.501515319 | -5.402297124 |
| 1453662_at   | -0.078157839 | 6.817748056 | -0.698909303 | 0.501526872 | 0.501526872 | -5.402309478 |
| 1416758_at   | -0.049287523 | 6.749157687 | -0.698878426 | 0.501545308 | 0.501545308 | -5.402329191 |
| 1422443_at   | 0.063336596  | 9.834540109 | 0.698852495  | 0.50156079  | 0.50156079  | -5.402345746 |
| 1459647_at   | -0.057825408 | 4.455266317 | -0.69879623  | 0.501594386 | 0.501594386 | -5.402381665 |
| 1450232_at   | 0.05183404   | 5.428185763 | 0.698763012  | 0.501614221 | 0.501614221 | -5.402402869 |
| 1416426_at   | 0.072674458  | 10.06777518 | 0.698717185  | 0.501641585 | 0.501641585 | -5.402432121 |
| 1452101_at   | 0.046567669  | 9.466510061 | 0.698715326  | 0.501642695 | 0.501642695 | -5.402433308 |
| 1427480_at   | 0.064638589  | 3.846567199 | 0.698713427  | 0.501643829 | 0.501643829 | -5.40243452  |
| 1434956_at   | 0.068571681  | 7.478477818 | 0.698642985  | 0.501685894 | 0.501685894 | -5.40247948  |
| 1436680_s_at | 0.057621028  | 7.528986628 | 0.698616433  | 0.50170175  | 0.50170175  | -5.402496426 |
| 1460024_at   | -0.057994185 | 6.883388011 | -0.69860171  | 0.501710542 | 0.501710542 | -5.402505822 |
| 1449799_s_at | 0.130812907  | 5.811672233 | 0.698574804  | 0.50172661  | 0.50172661  | -5.402522993 |
| 1423436_at   | -0.159117578 | 5.933432755 | -0.698553168 | 0.501739532 | 0.501739532 | -5.402536801 |
| 1456243_x_at | 0.075628665  | 9.80248317  | 0.69840209   | 0.501829761 | 0.501829761 | -5.402633203 |
| 1416249_at   | 0.063228391  | 8.471808957 | 0.698385366  | 0.50183975  | 0.50183975  | -5.402643874 |
| 1434815_a_at | 0.055505229  | 6.301268467 | 0.698336803  | 0.501868757 | 0.501868757 | -5.402674858 |
| 1419139_at   | -0.066728144 | 4.686039458 | -0.698325419 | 0.501875557 | 0.501875557 | -5.40268212  |
| 1452688_at   | -0.060016285 | 7.368900879 | -0.698286008 | 0.501899097 | 0.501899097 | -5.402707263 |

|              |              |             |              |             |             |              |
|--------------|--------------|-------------|--------------|-------------|-------------|--------------|
| 1459609_at   | -0.055779334 | 4.953431049 | -0.698283125 | 0.501900819 | 0.501900819 | -5.402709102 |
| 1451476_at   | -0.082462054 | 8.647221084 | -0.69821881  | 0.501939238 | 0.501939238 | -5.40275013  |
| 1431834_a_at | -0.061761309 | 8.697982282 | -0.69818127  | 0.501961662 | 0.501961662 | -5.402774075 |
| 1459552_at   | -0.045922821 | 3.853715804 | -0.698143708 | 0.501984101 | 0.501984101 | -5.402798034 |
| 1448847_at   | -0.061159817 | 3.792015127 | -0.698116643 | 0.50200027  | 0.50200027  | -5.402815297 |
| 1420882_a_at | -0.052006708 | 8.175761096 | -0.698106851 | 0.502006119 | 0.502006119 | -5.402821542 |
| 1449064_at   | 0.075032336  | 4.700572985 | 0.698081983  | 0.502020976 | 0.502020976 | -5.402837402 |
| 1442110_at   | -0.052616671 | 4.04062258  | -0.698059526 | 0.502034392 | 0.502034392 | -5.402851724 |
| 1457997_at   | 0.065664427  | 5.083953609 | 0.698056323  | 0.502036306 | 0.502036306 | -5.402853768 |
| 1458690_at   | 0.06242064   | 7.834694208 | 0.697984319  | 0.502079324 | 0.502079324 | -5.402899686 |
| 1423116_at   | -0.05637647  | 7.954599682 | -0.697977585 | 0.502083347 | 0.502083347 | -5.402903981 |
| 1445678_at   | -0.058792036 | 3.39654895  | -0.697946311 | 0.502102033 | 0.502102033 | -5.402923924 |
| 1456622_at   | 0.089499566  | 6.09322882  | 0.697909452  | 0.502124055 | 0.502124055 | -5.402947427 |
| 1432475_at   | -0.049907531 | 4.664134277 | -0.697895488 | 0.502132399 | 0.502132399 | -5.402956331 |
| 1421778_at   | 0.050404249  | 3.257385665 | 0.697889181  | 0.502136167 | 0.502136167 | -5.402960352 |
| 1446017_at   | -0.073834136 | 3.578848956 | -0.697865996 | 0.50215002  | 0.50215002  | -5.402975135 |
| 1438980_x_at | -0.068010907 | 3.280269187 | -0.697849012 | 0.502160168 | 0.502160168 | -5.402985964 |
| 1444313_at   | -0.058939072 | 3.957871392 | -0.697837224 | 0.502167212 | 0.502167212 | -5.40299348  |
| 1435709_at   | -0.050144797 | 8.237001842 | -0.697830042 | 0.502171503 | 0.502171503 | -5.402998059 |
| 1428275_at   | 0.044838525  | 7.772820151 | 0.697816597  | 0.502179537 | 0.502179537 | -5.403006631 |
| 1452417_x_at | -0.051991991 | 3.230462835 | -0.697714864 | 0.502240328 | 0.502240328 | -5.403071488 |
| 1421223_a_at | 0.064619855  | 8.547517993 | 0.697705472  | 0.50224594  | 0.50224594  | -5.403077475 |
| 1443440_at   | -0.05798195  | 3.687583333 | -0.697544489 | 0.502342147 | 0.502342147 | -5.403180087 |
| 1457201_at   | -0.058413786 | 4.197014635 | -0.697515979 | 0.502359186 | 0.502359186 | -5.403198257 |
| 1424409_at   | 0.078615098  | 6.238132767 | 0.697496842  | 0.502370623 | 0.502370623 | -5.403210453 |
| 1416819_at   | -0.055653907 | 10.62765875 | -0.697476354 | 0.502382868 | 0.502382868 | -5.40322351  |
| 1444354_at   | -0.05037626  | 5.880242201 | -0.697438807 | 0.50240531  | 0.50240531  | -5.403247438 |
| 1431235_at   | -0.080757703 | 6.831631786 | -0.697371931 | 0.502445282 | 0.502445282 | -5.403290053 |
| 1438287_x_at | 0.062562324  | 3.508088916 | 0.697285005  | 0.502497242 | 0.502497242 | -5.403345439 |
| 1454127_at   | 0.046856469  | 3.609176623 | 0.697274114  | 0.502503752 | 0.502503752 | -5.403352378 |
| 1422208_a_at | 0.055077095  | 7.917350837 | 0.697254615  | 0.502515408 | 0.502515408 | -5.403364801 |
| 1420355_at   | -0.056449737 | 4.429699574 | -0.697229876 | 0.502530197 | 0.502530197 | -5.403380562 |
| 1442749_at   | -0.060070062 | 5.643987082 | -0.697188234 | 0.502555091 | 0.502555091 | -5.403407091 |
| 1421679_a_at | -0.128736118 | 9.166292255 | -0.697172787 | 0.502564325 | 0.502564325 | -5.403416932 |
| 1437690_x_at | 0.085859987  | 11.19645629 | 0.697150644  | 0.502577562 | 0.502577562 | -5.403431037 |
| 1424381_at   | 0.052628807  | 8.733033784 | 0.697149228  | 0.502578409 | 0.502578409 | -5.40343194  |
| 1459306_at   | -0.05068628  | 3.967588624 | -0.697122347 | 0.502594479 | 0.502594479 | -5.403449063 |
| 1454194_at   | -0.057432034 | 3.915257816 | -0.69708141  | 0.502618953 | 0.502618953 | -5.403475139 |
| 1450628_at   | -0.048549662 | 7.971486013 | -0.697019328 | 0.50265607  | 0.50265607  | -5.403514682 |
| 1457184_at   | 0.093357521  | 7.393325844 | 0.697014127  | 0.50265918  | 0.50265918  | -5.403517994 |
| 1415961_at   | 0.043122892  | 10.99188122 | 0.696850884  | 0.502756786 | 0.502756786 | -5.403621955 |
| 1448738_at   | 0.068700238  | 3.313699349 | 0.696789996  | 0.502793195 | 0.502793195 | -5.403660725 |
| 1455355_at   | 0.077551928  | 7.481641795 | 0.696785934  | 0.502795624 | 0.502795624 | -5.403663312 |
| 1417555_at   | 0.07861698   | 5.870902015 | 0.696706715  | 0.502842997 | 0.502842997 | -5.403713749 |
| 1450651_at   | -0.082110124 | 4.938260226 | -0.69669479  | 0.502850128 | 0.502850128 | -5.403721342 |
| 1454220_at   | -0.053021294 | 3.72062228  | -0.696672015 | 0.502863748 | 0.502863748 | -5.403735841 |
| 1454849_x_at | 0.089026605  | 9.015306354 | 0.696593562  | 0.502910667 | 0.502910667 | -5.403785784 |
| 1453311_at   | -0.105986344 | 6.551484553 | -0.696591016 | 0.50291219  | 0.50291219  | -5.403787405 |
| 1429924_at   | -0.077133903 | 5.053797494 | -0.696541246 | 0.502941956 | 0.502941956 | -5.403819086 |
| 1454420_at   | -0.050942601 | 3.503060169 | -0.696500863 | 0.502966109 | 0.502966109 | -5.40384479  |
| 1428142_at   | 0.122993627  | 7.515398064 | 0.696494891  | 0.502969682 | 0.502969682 | -5.403848592 |
| 1450023_at   | -0.067411813 | 8.303353957 | -0.69647182  | 0.50298348  | 0.50298348  | -5.403863275 |
| 1438695_at   | 0.053172632  | 8.27927617  | 0.69642576   | 0.503011031 | 0.503011031 | -5.403892591 |

|              |              |             |              |             |             |              |
|--------------|--------------|-------------|--------------|-------------|-------------|--------------|
| 1454179_at   | -0.066143809 | 3.965762692 | -0.696385882 | 0.503034884 | 0.503034884 | -5.40391797  |
| 1443215_at   | 0.051816888  | 4.737941782 | 0.696360459  | 0.503050091 | 0.503050091 | -5.403934149 |
| 1430815_at   | -0.08652279  | 4.460726316 | -0.69635     | 0.503056347 | 0.503056347 | -5.403940805 |
| 1437727_at   | 0.07810571   | 6.105123857 | 0.696276004  | 0.503100611 | 0.503100611 | -5.403987891 |
| 1418179_at   | -0.05417411  | 3.809755715 | -0.696244796 | 0.50311928  | 0.50311928  | -5.404007749 |
| 1454607_s_at | 0.09007764   | 9.199134403 | 0.696190865  | 0.503151543 | 0.503151543 | -5.404042063 |
| 1446666_at   | 0.063966961  | 3.466448853 | 0.696138848  | 0.503182662 | 0.503182662 | -5.404075157 |
| 1416597_at   | -0.065050619 | 7.500926739 | -0.696138817 | 0.503182681 | 0.503182681 | -5.404075177 |
| 1452750_at   | -0.116886065 | 8.041130165 | -0.696090479 | 0.503211601 | 0.503211601 | -5.404105929 |
| 1418917_at   | -0.070314301 | 6.56827781  | -0.696086847 | 0.503213774 | 0.503213774 | -5.404108239 |
| 1441667_s_at | -0.199362369 | 4.293019245 | -0.696074358 | 0.503221246 | 0.503221246 | -5.404116184 |
| 1422407_s_at | -0.059941481 | 8.858986238 | -0.696053956 | 0.503233452 | 0.503233452 | -5.404129163 |
| 1422756_at   | 0.068277386  | 4.184489278 | 0.695984247  | 0.50327516  | 0.50327516  | -5.404173505 |
| 1436078_at   | 0.05727      | 5.09333634  | 0.695975229  | 0.503280556 | 0.503280556 | -5.404179241 |
| 1441662_at   | 0.088201752  | 3.859628023 | 0.695954883  | 0.50329273  | 0.50329273  | -5.404192182 |
| 1456729_x_at | 0.04629357   | 3.585139414 | 0.695894846  | 0.503328654 | 0.503328654 | -5.404230367 |
| 1454799_at   | -0.087594847 | 3.992586408 | -0.695878033 | 0.503338714 | 0.503338714 | -5.40424106  |
| 1442157_at   | -0.075672479 | 6.536110211 | -0.695851107 | 0.503354827 | 0.503354827 | -5.404258184 |
| 1425680_a_at | -0.052732215 | 7.457949232 | -0.695838155 | 0.503362577 | 0.503362577 | -5.404266421 |
| 1455431_at   | 0.057341121  | 3.053266638 | 0.69580734   | 0.503381017 | 0.503381017 | -5.404286018 |
| 1455033_at   | 0.100437762  | 8.812624481 | 0.695776028  | 0.503399755 | 0.503399755 | -5.40430593  |
| 1427778_at   | 0.050441746  | 3.455822156 | 0.695762889  | 0.503407618 | 0.503407618 | -5.404314285 |
| 1423090_x_at | -0.048608949 | 11.37772444 | -0.695710942 | 0.503438705 | 0.503438705 | -5.404347317 |
| 1439755_at   | -0.054747176 | 8.509933851 | -0.695689206 | 0.503451713 | 0.503451713 | -5.404361137 |
| 1438114_x_at | -0.088601635 | 8.551665941 | -0.695681755 | 0.503456172 | 0.503456172 | -5.404365875 |
| 1436630_at   | 0.073061403  | 5.421476354 | 0.695635266  | 0.503483995 | 0.503483995 | -5.404395433 |
| 1426653_at   | 0.048671099  | 8.654849691 | 0.6954939    | 0.503568605 | 0.503568605 | -5.404485304 |
| 1446975_at   | -0.055653879 | 5.191346027 | -0.695464534 | 0.503586182 | 0.503586182 | -5.404503971 |
| 1427325_s_at | 0.07108188   | 6.770249551 | 0.695459866  | 0.503588976 | 0.503588976 | -5.404506938 |
| 1459117_at   | 0.052982032  | 4.099576511 | 0.695440469  | 0.503600587 | 0.503600587 | -5.404519268 |
| 1426986_at   | 0.05994704   | 8.582659403 | 0.695425052  | 0.503609815 | 0.503609815 | -5.404529067 |
| 1440499_at   | 0.077374773  | 5.163486221 | 0.695404213  | 0.503622289 | 0.503622289 | -5.404542313 |
| 1459852_x_at | -0.073217578 | 3.149826621 | -0.695399236 | 0.503625268 | 0.503625268 | -5.404545476 |
| 1458326_at   | -0.049012655 | 3.503380538 | -0.695377733 | 0.50363814  | 0.50363814  | -5.404559143 |
| 1451790_a_at | -0.056748071 | 8.63168873  | -0.695356029 | 0.503651132 | 0.503651132 | -5.404572937 |
| 1440152_x_at | -0.047897576 | 8.420386064 | -0.695326364 | 0.50366889  | 0.50366889  | -5.404591791 |
| 1436963_x_at | -0.071511341 | 6.929658446 | -0.695315108 | 0.503675628 | 0.503675628 | -5.404598945 |
| 1429597_at   | -0.058899235 | 3.971795688 | -0.695208063 | 0.50373971  | 0.50373971  | -5.40466697  |
| 1440567_at   | 0.105906949  | 5.891442844 | 0.695105052  | 0.503801383 | 0.503801383 | -5.404732424 |
| 1426342_at   | 0.05287878   | 11.85009781 | 0.695046507  | 0.503836436 | 0.503836436 | -5.40476962  |
| 1452830_s_at | -0.08420106  | 8.646265573 | -0.695005997 | 0.503860691 | 0.503860691 | -5.404795355 |
| 1440077_at   | -0.052559388 | 3.53703059  | -0.694912988 | 0.503916384 | 0.503916384 | -5.404854438 |
| 1453042_at   | -0.057575001 | 4.913780661 | -0.694909048 | 0.503918743 | 0.503918743 | -5.404856941 |
| 1442612_at   | 0.050508351  | 3.175131649 | 0.694902223  | 0.50392283  | 0.50392283  | -5.404861276 |
| 1439561_at   | 0.057499009  | 6.226382519 | 0.694879449  | 0.503936468 | 0.503936468 | -5.404875742 |
| 1454104_a_at | -0.077793624 | 4.689518868 | -0.694873574 | 0.503939985 | 0.503939985 | -5.404879474 |
| 1447212_at   | 0.075825228  | 4.390386245 | 0.694867096  | 0.503943865 | 0.503943865 | -5.404883588 |
| 1439673_at   | 0.082781222  | 7.525849893 | 0.694857617  | 0.503949541 | 0.503949541 | -5.404889609 |
| 1439361_at   | -0.043480831 | 3.07744565  | -0.694855611 | 0.503950742 | 0.503950742 | -5.404890883 |
| 1429518_at   | -0.079681704 | 5.193889602 | -0.694789774 | 0.503990168 | 0.503990168 | -5.404932698 |
| 1435216_a_at | -0.057700935 | 4.719988929 | -0.694774001 | 0.503999614 | 0.503999614 | -5.404942716 |
| 1450874_at   | 0.053644016  | 11.27172226 | 0.694716065  | 0.504034311 | 0.504034311 | -5.404979509 |
| 1428771_at   | 0.057834598  | 8.082034364 | 0.694666978  | 0.504063709 | 0.504063709 | -5.40501068  |

|              |              |             |              |             |             |              |
|--------------|--------------|-------------|--------------|-------------|-------------|--------------|
| 1423680_at   | -0.066575533 | 9.438753647 | -0.694643476 | 0.504077785 | 0.504077785 | -5.405025604 |
| 1450052_at   | -0.044940745 | 9.021893253 | -0.694631742 | 0.504084812 | 0.504084812 | -5.405033054 |
| 1438051_at   | 0.06781338   | 7.214281893 | 0.694621558  | 0.504090912 | 0.504090912 | -5.405039521 |
| 1452687_at   | 0.047030651  | 6.484067046 | 0.694600101  | 0.504103763 | 0.504103763 | -5.405053145 |
| 1420578_at   | 0.064288214  | 4.498132324 | 0.694579736  | 0.50411596  | 0.50411596  | -5.405066075 |
| 1450154_at   | -0.077675589 | 3.141459504 | -0.6945634   | 0.504125745 | 0.504125745 | -5.405076448 |
| 1416876_at   | -0.045435595 | 4.813526896 | -0.694474158 | 0.504179199 | 0.504179199 | -5.405133106 |
| 1433727_at   | 0.095026513  | 5.977460856 | 0.69446827   | 0.504182726 | 0.504182726 | -5.405136844 |
| 1438479_at   | 0.093430429  | 5.374399862 | 0.694466615  | 0.504183717 | 0.504183717 | -5.405137895 |
| 1428515_at   | -0.05438842  | 6.885843914 | -0.69446164  | 0.504186697 | 0.504186697 | -5.405141053 |
| 1434588_x_at | 0.045931479  | 6.568714892 | 0.694396214  | 0.504225889 | 0.504225889 | -5.405182586 |
| 1427082_at   | 0.053676818  | 5.925527476 | 0.694371829  | 0.504240496 | 0.504240496 | -5.405198065 |
| 1459240_at   | -0.060523334 | 6.217681989 | -0.694342906 | 0.504257822 | 0.504257822 | -5.405216424 |
| 1438261_at   | -0.060403646 | 4.345275807 | -0.694316663 | 0.504273543 | 0.504273543 | -5.405233081 |
| 1437881_at   | 0.083842137  | 4.165677059 | 0.694268626  | 0.504302321 | 0.504302321 | -5.40526357  |
| 1438619_x_at | -0.088697316 | 7.585675721 | -0.694212246 | 0.504336099 | 0.504336099 | -5.405299352 |
| 1433500_at   | -0.085389834 | 7.867098582 | -0.694198281 | 0.504344465 | 0.504344465 | -5.405308215 |
| 1417983_a_at | 0.043588651  | 9.109697339 | 0.694137457  | 0.504380907 | 0.504380907 | -5.405346814 |
| 1451022_at   | -0.046387148 | 8.214717724 | -0.69411077  | 0.504396896 | 0.504396896 | -5.405363748 |
| 1418568_x_at | 0.051564219  | 10.44327347 | 0.694082002  | 0.504414133 | 0.504414133 | -5.405382002 |
| 1415700_a_at | -0.049150358 | 11.69826742 | -0.694064315 | 0.504424731 | 0.504424731 | -5.405393225 |
| 1440978_at   | 0.049122013  | 6.577401226 | 0.694006989  | 0.50445908  | 0.50445908  | -5.405429598 |
| 1447666_x_at | -0.05145244  | 5.827855232 | -0.693999632 | 0.504463488 | 0.504463488 | -5.405434265 |
| 1458503_at   | 0.054607711  | 3.461966935 | 0.693979918  | 0.5044753   | 0.5044753   | -5.405446773 |
| 1423348_at   | -0.089292327 | 8.076511745 | -0.69397841  | 0.504476204 | 0.504476204 | -5.40544773  |
| 1456260_at   | 0.084121776  | 8.106471259 | 0.693923923  | 0.504508854 | 0.504508854 | -5.405482298 |
| 1433382_at   | -0.0646188   | 5.695441687 | -0.693900535 | 0.504522869 | 0.504522869 | -5.405497135 |
| 1454648_s_at | 0.066756378  | 8.237334374 | 0.693808623  | 0.504577949 | 0.504577949 | -5.405555439 |
| 1454843_at   | 0.052069579  | 8.643695508 | 0.693760115  | 0.50460702  | 0.50460702  | -5.405586207 |
| 1433134_at   | 0.05784876   | 3.600799081 | 0.6937437    | 0.504616857 | 0.504616857 | -5.405596617 |
| 1455694_at   | -0.062751828 | 4.33608769  | -0.693668356 | 0.504662014 | 0.504662014 | -5.405644402 |
| 1425760_a_at | -0.075286782 | 5.925540206 | -0.693658779 | 0.504667754 | 0.504667754 | -5.405650476 |
| 1426721_s_at | 0.051739832  | 8.533510757 | 0.693655184  | 0.504669909 | 0.504669909 | -5.405652756 |
| 1426608_at   | 0.05369318   | 4.225952529 | 0.693620298  | 0.504690818 | 0.504690818 | -5.40567488  |
| 1434785_at   | -0.066358212 | 4.243427472 | -0.693618895 | 0.504691659 | 0.504691659 | -5.405675769 |
| 1440750_at   | 0.0593878    | 3.588092279 | 0.693523521  | 0.504748825 | 0.504748825 | -5.405736247 |
| 1458553_at   | -0.043497596 | 4.677238515 | -0.693404818 | 0.50481998  | 0.50481998  | -5.405811507 |
| 1449007_at   | -0.049429761 | 10.28818933 | -0.693380009 | 0.504834853 | 0.504834853 | -5.405827236 |
| 1451802_at   | 0.07164648   | 3.951936159 | 0.693366918  | 0.504842701 | 0.504842701 | -5.405835535 |
| 1446910_at   | 0.138700848  | 5.292142745 | 0.693350727  | 0.504852406 | 0.504852406 | -5.405845799 |
| 1420250_at   | -0.05452686  | 3.566455252 | -0.693349569 | 0.5048531   | 0.5048531   | -5.405846533 |
| 1428016_a_at | 0.099297272  | 6.580588654 | 0.693306479  | 0.504878933 | 0.504878933 | -5.405873849 |
| 1443656_at   | -0.06152493  | 5.491476609 | -0.693119742 | 0.504990891 | 0.504990891 | -5.405992206 |
| 1439582_at   | 0.050760424  | 7.978529683 | 0.693048519  | 0.505033597 | 0.505033597 | -5.406037341 |
| 1427637_a_at | -0.072637824 | 5.361012084 | -0.692944065 | 0.505096232 | 0.505096232 | -5.406103528 |
| 1446047_at   | -0.050535497 | 7.049979464 | -0.692896439 | 0.505124792 | 0.505124792 | -5.406133703 |
| 1429939_at   | 0.073566614  | 5.501394904 | 0.692891028  | 0.505128037 | 0.505128037 | -5.406137131 |
| 1425766_x_at | -0.045604173 | 4.469041026 | -0.692878229 | 0.505135712 | 0.505135712 | -5.40614524  |
| 1441269_at   | 0.051522306  | 3.180378662 | 0.692851505  | 0.505151739 | 0.505151739 | -5.40616217  |
| 1428635_at   | 0.056420467  | 6.77084908  | 0.692796852  | 0.505184515 | 0.505184515 | -5.406196793 |
| 1426161_at   | 0.05498498   | 3.224876974 | 0.692783183  | 0.505192713 | 0.505192713 | -5.406205453 |
| 1416491_at   | -0.096327119 | 8.276977397 | -0.692780311 | 0.505194435 | 0.505194435 | -5.406207272 |
| 1437144_x_at | 0.06261112   | 11.40362315 | 0.692725192  | 0.505227493 | 0.505227493 | -5.406242187 |

|              |              |             |              |             |             |              |
|--------------|--------------|-------------|--------------|-------------|-------------|--------------|
| 1424715_at   | -0.082440506 | 6.636938571 | -0.692665047 | 0.505263566 | 0.505263566 | -5.406280282 |
| 1423657_at   | 0.046878852  | 9.393134058 | 0.692646612  | 0.505274623 | 0.505274623 | -5.406291958 |
| 1445330_at   | 0.077751509  | 6.154807172 | 0.692625358  | 0.505287372 | 0.505287372 | -5.40630542  |
| 1416483_at   | 0.044279106  | 11.14443218 | 0.692574362  | 0.50531796  | 0.50531796  | -5.406337716 |
| 1424469_a_at | 0.045615748  | 8.299721781 | 0.692561686  | 0.505325563 | 0.505325563 | -5.406345744 |
| 1425048_a_at | 0.055492611  | 12.37283285 | 0.692527768  | 0.505345909 | 0.505345909 | -5.406367224 |
| 1445666_at   | -0.084177323 | 5.820654198 | -0.692494729 | 0.505365727 | 0.505365727 | -5.406388146 |
| 1446115_at   | 0.044268426  | 3.460507451 | 0.692468386  | 0.50538153  | 0.50538153  | -5.406404827 |
| 1436115_at   | -0.064093218 | 7.927860404 | -0.692446673 | 0.505394555 | 0.505394555 | -5.406418575 |
| 1419040_at   | -0.070048811 | 6.706585743 | -0.692435731 | 0.505401119 | 0.505401119 | -5.406425504 |
| 1433371_at   | -0.05905711  | 3.557352277 | -0.692430332 | 0.505404358 | 0.505404358 | -5.406428922 |
| 1420081_s_at | 0.045533104  | 8.558276922 | 0.692376177  | 0.505436845 | 0.505436845 | -5.406463211 |
| 1438715_at   | 0.076124339  | 6.332921805 | 0.692367679  | 0.505441943 | 0.505441943 | -5.406468591 |
| 1447175_at   | 0.048809501  | 3.707268196 | 0.692352867  | 0.505450829 | 0.505450829 | -5.406477969 |
| 1426729_at   | 0.060180736  | 5.494516678 | 0.692335469  | 0.505461267 | 0.505461267 | -5.406488984 |
| 1454649_at   | 0.094489045  | 7.214806558 | 0.692265859  | 0.505503029 | 0.505503029 | -5.406533053 |
| 1420298_at   | -0.046207619 | 3.423963403 | -0.692237831 | 0.505519845 | 0.505519845 | -5.406550796 |
| 1449504_at   | -0.050187577 | 6.407709807 | -0.692203038 | 0.505540721 | 0.505540721 | -5.40657282  |
| 1457805_at   | 0.067120516  | 3.773229508 | 0.692181153  | 0.505553852 | 0.505553852 | -5.406586673 |
| 1447741_x_at | -0.056469617 | 7.201551779 | -0.692180565 | 0.505554204 | 0.505554204 | -5.406587045 |
| 1428738_a_at | -0.061852119 | 9.079032909 | -0.692079542 | 0.50561482  | 0.50561482  | -5.406650987 |
| 1421525_a_at | -0.054155596 | 3.769376566 | -0.69196247  | 0.505685071 | 0.505685071 | -5.406725075 |
| 1430527_a_at | -0.050658932 | 9.442118418 | -0.691961071 | 0.505685911 | 0.505685911 | -5.406725961 |
| 1458652_at   | -0.04557781  | 3.506845395 | -0.691896062 | 0.505724924 | 0.505724924 | -5.406767097 |
| 1420657_at   | -0.067333719 | 5.375181095 | -0.691777994 | 0.505795782 | 0.505795782 | -5.406841799 |
| 1439917_at   | 0.097450038  | 5.292669399 | 0.691763073  | 0.505804738 | 0.505804738 | -5.406851239 |
| 1423361_at   | -0.049478717 | 8.794969329 | -0.691761005 | 0.505805979 | 0.505805979 | -5.406852547 |
| 1445522_at   | 0.055428684  | 3.711279558 | 0.691748333  | 0.505813584 | 0.505813584 | -5.406860564 |
| 1438760_x_at | -0.063401336 | 8.0031858   | -0.691639301 | 0.505879027 | 0.505879027 | -5.406929535 |
| 1453087_at   | -0.047504859 | 6.841280596 | -0.691595832 | 0.505905119 | 0.505905119 | -5.406957031 |
| 1452536_s_at | -0.056944546 | 4.130261422 | -0.691587613 | 0.505910052 | 0.505910052 | -5.406962229 |
| 1427094_at   | -0.05315479  | 8.75359633  | -0.691549315 | 0.505933041 | 0.505933041 | -5.406986452 |
| 1447303_at   | -0.06416201  | 3.944008918 | -0.691538493 | 0.505939537 | 0.505939537 | -5.406993296 |
| 1433797_at   | -0.065336916 | 7.990282874 | -0.691484868 | 0.505971728 | 0.505971728 | -5.40702721  |
| 1422958_at   | -0.073933455 | 4.727611337 | -0.691337883 | 0.506059968 | 0.506059968 | -5.407120157 |
| 1442177_at   | 0.050679968  | 4.175644382 | 0.691317681  | 0.506072097 | 0.506072097 | -5.407132931 |
| 1425466_at   | -0.04387044  | 9.132869295 | -0.691284069 | 0.506092277 | 0.506092277 | -5.407154182 |
| 1435645_at   | 0.051361926  | 6.826717576 | 0.691196523  | 0.506144841 | 0.506144841 | -5.40720953  |
| 1450275_x_at | -0.050493131 | 8.944038821 | -0.691098243 | 0.506203853 | 0.506203853 | -5.407271656 |
| 1447322_at   | -0.049793178 | 3.829148345 | -0.691097881 | 0.506204071 | 0.506204071 | -5.407271886 |
| 1429544_at   | -0.075608797 | 5.530137768 | -0.691055624 | 0.506229446 | 0.506229446 | -5.407298595 |
| 1437903_at   | -0.067572879 | 3.80971354  | -0.691030374 | 0.506244608 | 0.506244608 | -5.407314555 |
| 1433791_at   | 0.062025518  | 3.733935204 | 0.690977328  | 0.506276463 | 0.506276463 | -5.407348081 |
| 1427032_at   | 0.043278875  | 9.036949901 | 0.690974691  | 0.506278046 | 0.506278046 | -5.407349747 |
| 1454244_at   | -0.051007452 | 4.454327422 | -0.690957604 | 0.506288308 | 0.506288308 | -5.407360546 |
| 1447859_at   | -0.047371316 | 3.072523934 | -0.690900847 | 0.506322392 | 0.506322392 | -5.407396414 |
| 1440722_at   | 0.048634044  | 6.75399978  | 0.690895674  | 0.5063255   | 0.5063255   | -5.407399684 |
| 1423350_at   | 0.044105508  | 7.66331971  | 0.690891092  | 0.506328251 | 0.506328251 | -5.407402579 |
| 1428390_at   | 0.043498439  | 9.044702532 | 0.690806044  | 0.506379329 | 0.506379329 | -5.40745632  |
| 1460447_at   | 0.044793286  | 7.572478322 | 0.690803636  | 0.506380776 | 0.506380776 | -5.407457842 |
| 1447560_at   | -0.092966463 | 5.110875498 | -0.690801601 | 0.506381998 | 0.506381998 | -5.407459128 |
| 1458405_at   | 0.073623545  | 4.729815246 | 0.690763017  | 0.506405172 | 0.506405172 | -5.407483507 |
| 1428745_a_at | 0.045049734  | 7.279727733 | 0.690654037  | 0.50647063  | 0.50647063  | -5.407552358 |

|              |              |             |              |             |             |              |
|--------------|--------------|-------------|--------------|-------------|-------------|--------------|
| 1458074_at   | -0.066877432 | 4.821444685 | -0.69064538  | 0.50647583  | 0.50647583  | -5.407557827 |
| 1430496_at   | 0.139431829  | 5.238938632 | 0.690618218  | 0.506492146 | 0.506492146 | -5.407574986 |
| 1416499_a_at | -0.088743074 | 9.487445423 | -0.690571609 | 0.506520143 | 0.506520143 | -5.407604428 |
| 1440475_at   | 0.058810102  | 4.269835635 | 0.690508828  | 0.506557857 | 0.506557857 | -5.407644083 |
| 1420976_at   | -0.053135144 | 7.674663731 | -0.690485979 | 0.506571583 | 0.506571583 | -5.407658515 |
| 1440472_at   | -0.08940032  | 3.745335306 | -0.690477699 | 0.506576557 | 0.506576557 | -5.407663745 |
| 1449393_at   | -0.076592574 | 3.620023143 | -0.690416935 | 0.506613062 | 0.506613062 | -5.407702121 |
| 1451904_a_at | -0.072615688 | 7.698750469 | -0.690380977 | 0.506634664 | 0.506634664 | -5.40772483  |
| 1448707_at   | 0.067229694  | 9.44923696  | 0.690310367  | 0.506677087 | 0.506677087 | -5.407769419 |
| 1434639_at   | -0.092816983 | 7.167139314 | -0.690272082 | 0.50670009  | 0.50670009  | -5.407793594 |
| 1446744_at   | -0.061642236 | 5.236345846 | -0.690222013 | 0.506730174 | 0.506730174 | -5.407825208 |
| 1446219_at   | -0.052161195 | 6.855962943 | -0.690143504 | 0.506777347 | 0.506777347 | -5.407874775 |
| 1453149_at   | -0.052038592 | 7.514882898 | -0.690087761 | 0.506810844 | 0.506810844 | -5.407909965 |
| 1434539_at   | 0.107908482  | 5.505044332 | 0.689984286  | 0.506873025 | 0.506873025 | -5.407975282 |
| 1423046_s_at | 0.057842934  | 10.52284867 | 0.689966434  | 0.506883754 | 0.506883754 | -5.40798655  |
| 1417813_at   | 0.049283392  | 6.037410994 | 0.68996541   | 0.506884369 | 0.506884369 | -5.407987196 |
| 1435785_at   | 0.056545084  | 7.366957089 | 0.689963156  | 0.506885724 | 0.506885724 | -5.407988619 |
| 1440705_at   | 0.046995397  | 3.136956555 | 0.689948914  | 0.506894283 | 0.506894283 | -5.407997608 |
| 1428496_at   | 0.049555651  | 8.722769263 | 0.689845061  | 0.506956698 | 0.506956698 | -5.408063151 |
| 1427237_at   | -0.050257091 | 3.74326277  | -0.689797389 | 0.506985351 | 0.506985351 | -5.408093235 |
| 1427147_at   | 0.042348874  | 7.346230661 | 0.689788642  | 0.506990608 | 0.506990608 | -5.408098755 |
| 1431162_a_at | 0.10436743   | 5.701233345 | 0.689675792  | 0.507058439 | 0.507058439 | -5.408169962 |
| 1443510_at   | -0.064172915 | 6.232633524 | -0.689620511 | 0.507091668 | 0.507091668 | -5.408204839 |
| 1418532_at   | -0.062281169 | 10.88080274 | -0.689596951 | 0.507105831 | 0.507105831 | -5.408219703 |
| 1423215_at   | -0.050593728 | 11.29668992 | -0.689568741 | 0.507122789 | 0.507122789 | -5.408237499 |
| 1419066_at   | 0.099194425  | 6.996446582 | 0.689563037  | 0.507126218 | 0.507126218 | -5.408241098 |
| 1441032_at   | -0.05781304  | 4.539959982 | -0.689562878 | 0.507126313 | 0.507126313 | -5.408241198 |
| 1448645_at   | -0.052197617 | 9.185477773 | -0.689529578 | 0.507146331 | 0.507146331 | -5.408262205 |
| 1423408_a_at | 0.073594717  | 11.09651457 | 0.689408446  | 0.507219154 | 0.507219154 | -5.408338611 |
| 1445870_at   | 0.056548807  | 3.883118465 | 0.689393139  | 0.507228357 | 0.507228357 | -5.408348265 |
| 1454242_at   | -0.100532254 | 4.545128548 | -0.689374965 | 0.507239283 | 0.507239283 | -5.408359728 |
| 1437027_x_at | 0.054216734  | 10.90023304 | 0.689362651  | 0.507246687 | 0.507246687 | -5.408367494 |
| 1445118_at   | -0.074217272 | 4.505435829 | -0.689359792 | 0.507248406 | 0.507248406 | -5.408369298 |
| 1439102_at   | 0.047101177  | 8.421538651 | 0.689355704  | 0.507250864 | 0.507250864 | -5.408371876 |
| 1428838_a_at | -0.056768393 | 6.97939979  | -0.689337938 | 0.507261545 | 0.507261545 | -5.40838308  |
| 1426582_at   | 0.048391335  | 9.184283674 | 0.689327402  | 0.50726788  | 0.50726788  | -5.408389725 |
| 1425485_at   | -0.0570985   | 7.723601437 | -0.689305021 | 0.507281337 | 0.507281337 | -5.40840384  |
| 1460265_at   | 0.063376479  | 5.951914049 | 0.689251862  | 0.507313299 | 0.507313299 | -5.408437362 |
| 1439092_at   | 0.074957931  | 6.520760588 | 0.68919973   | 0.507344646 | 0.507344646 | -5.408470236 |
| 1432248_at   | -0.068517719 | 4.359426548 | -0.689114481 | 0.507395908 | 0.507395908 | -5.408523986 |
| 1455324_at   | 0.044960482  | 6.854208091 | 0.689105386  | 0.507401377 | 0.507401377 | -5.408529721 |
| 1453584_at   | 0.109644916  | 5.688450284 | 0.689066335  | 0.507424861 | 0.507424861 | -5.40855434  |
| 1459717_at   | -0.055742024 | 3.171704822 | -0.689063743 | 0.507426419 | 0.507426419 | -5.408555974 |
| 1453692_at   | -0.067473454 | 3.943691596 | -0.688902233 | 0.507523551 | 0.507523551 | -5.408657786 |
| 1450694_at   | -0.051457541 | 8.985769463 | -0.688900078 | 0.507524847 | 0.507524847 | -5.408659145 |
| 1454278_at   | 0.060592788  | 3.691178505 | 0.688847334  | 0.50755657  | 0.50755657  | -5.408692389 |
| 1446579_at   | -0.073993746 | 3.830504422 | -0.688834425 | 0.507564334 | 0.507564334 | -5.408700524 |
| 1437490_x_at | -0.08368995  | 7.052578892 | -0.688823865 | 0.507570685 | 0.507570685 | -5.40870718  |
| 1430402_at   | 0.054264051  | 3.537939128 | 0.688823251  | 0.507571055 | 0.507571055 | -5.408707567 |
| 1434756_at   | -0.058895064 | 7.925466635 | -0.688811851 | 0.507577911 | 0.507577911 | -5.408714752 |
| 1433424_at   | 0.045411645  | 4.063672375 | 0.688789234  | 0.507591515 | 0.507591515 | -5.408729006 |
| 1443758_at   | 0.060970911  | 3.531559556 | 0.688693832  | 0.507648899 | 0.507648899 | -5.408789125 |
| 1418811_at   | -0.04189571  | 3.583822234 | -0.688684897 | 0.507654274 | 0.507654274 | -5.408794756 |

|              |              |             |              |             |             |              |
|--------------|--------------|-------------|--------------|-------------|-------------|--------------|
| 1418598_at   | 0.058409827  | 6.992497204 | 0.688623715  | 0.507691078 | 0.507691078 | -5.408833307 |
| 1455343_at   | -0.067312803 | 4.798287106 | -0.688592392 | 0.50770992  | 0.50770992  | -5.408853043 |
| 1428787_at   | 0.105439542  | 5.729938235 | 0.688553479  | 0.507733329 | 0.507733329 | -5.408877559 |
| 1449241_at   | -0.056533514 | 4.584474927 | -0.688390482 | 0.507831391 | 0.507831391 | -5.40898024  |
| 1418702_a_at | -0.062438507 | 8.377620155 | -0.688347875 | 0.507857026 | 0.507857026 | -5.409007078 |
| 1460162_at   | 0.057813734  | 5.208106062 | 0.688338035  | 0.507862947 | 0.507862947 | -5.409013275 |
| 1454683_at   | 0.046120032  | 6.991403751 | 0.688284427  | 0.507895202 | 0.507895202 | -5.409047039 |
| 1459528_at   | 0.049344905  | 3.402045861 | 0.688240987  | 0.507921341 | 0.507921341 | -5.409074397 |
| 1423492_at   | 0.065427677  | 9.30618829  | 0.688223868  | 0.507931642 | 0.507931642 | -5.409085178 |
| 1429563_x_at | -0.083957495 | 5.172162745 | -0.688168275 | 0.507965094 | 0.507965094 | -5.409120187 |
| 1420393_at   | -0.069756806 | 4.868680545 | -0.688160957 | 0.507969498 | 0.507969498 | -5.409124795 |
| 1455591_at   | 0.084762556  | 9.18406497  | 0.688118136  | 0.507995266 | 0.507995266 | -5.409151759 |
| 1441344_at   | -0.086811899 | 5.772265783 | -0.688094739 | 0.508009346 | 0.508009346 | -5.409166491 |
| 1424841_s_at | 0.083330756  | 4.047929573 | 0.688059528  | 0.508030536 | 0.508030536 | -5.409188661 |
| 1458029_at   | -0.045330308 | 4.066716639 | -0.688039397 | 0.50804265  | 0.50804265  | -5.409201336 |
| 1442076_at   | -0.079558314 | 5.758790306 | -0.688028208 | 0.508049384 | 0.508049384 | -5.40920838  |
| 1448221_at   | -0.073808214 | 12.12956956 | -0.687941965 | 0.508101288 | 0.508101288 | -5.409262676 |
| 1422337_at   | 0.064683566  | 3.747224474 | 0.687921486  | 0.508113613 | 0.508113613 | -5.409275567 |
| 1422943_a_at | 0.068080516  | 10.97261706 | 0.687887264  | 0.50813421  | 0.50813421  | -5.40929711  |
| 1457176_at   | 0.060927419  | 6.601999139 | 0.687863436  | 0.508148552 | 0.508148552 | -5.409312109 |
| 1434645_at   | 0.075751257  | 7.429258815 | 0.68784715   | 0.508158354 | 0.508158354 | -5.409322361 |
| 1425185_at   | -0.049508606 | 9.560826538 | -0.687842942 | 0.508160887 | 0.508160887 | -5.409325009 |
| 1451885_at   | -0.057541262 | 6.777603904 | -0.68781233  | 0.508179312 | 0.508179312 | -5.409344277 |
| 1429593_at   | -0.059405138 | 8.957785323 | -0.687772459 | 0.508203311 | 0.508203311 | -5.409369372 |
| 1460637_s_at | 0.06468728   | 10.79591732 | 0.687758265  | 0.508211855 | 0.508211855 | -5.409378306 |
| 1439357_at   | -0.069627604 | 5.624006728 | -0.687722205 | 0.508233561 | 0.508233561 | -5.409401    |
| 1444605_at   | 0.092490979  | 3.160343222 | 0.687689888  | 0.508253014 | 0.508253014 | -5.409421338 |
| 1423113_a_at | 0.046918891  | 10.78340553 | 0.687686826  | 0.508254857 | 0.508254857 | -5.409423265 |
| 1441820_at   | -0.052180873 | 3.434837153 | -0.687661276 | 0.508270238 | 0.508270238 | -5.409439344 |
| 1458704_at   | -0.113696149 | 5.909817667 | -0.687610125 | 0.50830103  | 0.50830103  | -5.409471532 |
| 1421613_at   | -0.046594048 | 3.786441093 | -0.687601497 | 0.508306224 | 0.508306224 | -5.409476962 |
| 1432558_a_at | -0.105144736 | 7.186239332 | -0.687545789 | 0.50833976  | 0.50833976  | -5.409512014 |
| 1421095_a_at | 0.064501041  | 3.803074903 | 0.687528158  | 0.508350375 | 0.508350375 | -5.409523108 |
| 1431363_at   | 0.059349127  | 3.977921537 | 0.687401241  | 0.508426786 | 0.508426786 | -5.409602956 |
| 1421350_a_at | 0.065033705  | 6.528239459 | 0.687389011  | 0.50843415  | 0.50843415  | -5.409610649 |
| 1436935_x_at | 0.048302429  | 11.93483725 | 0.687385561  | 0.508436227 | 0.508436227 | -5.40961282  |
| 1446096_at   | 0.068762921  | 4.794897892 | 0.687310644  | 0.508481336 | 0.508481336 | -5.409659946 |
| 1435354_at   | 0.124195641  | 5.350589743 | 0.687272158  | 0.508504509 | 0.508504509 | -5.409684153 |
| 1419556_at   | 0.071337725  | 4.282536768 | 0.687229109  | 0.508530431 | 0.508530431 | -5.409711229 |
| 1424767_at   | -0.079979675 | 5.437868295 | -0.687122308 | 0.508594746 | 0.508594746 | -5.409778397 |
| 1420897_at   | -0.081871022 | 8.92667377  | -0.687117744 | 0.508597494 | 0.508597494 | -5.409781266 |
| 1438771_at   | 0.100819956  | 7.634424716 | 0.687080731  | 0.508619784 | 0.508619784 | -5.409804542 |
| 1445990_at   | -0.045986116 | 3.09819033  | -0.687077907 | 0.508621484 | 0.508621484 | -5.409806317 |
| 1439063_at   | 0.046217626  | 7.914115529 | 0.686995123  | 0.508671341 | 0.508671341 | -5.409858371 |
| 1418972_at   | 0.042994891  | 7.811025042 | 0.686985685  | 0.508677025 | 0.508677025 | -5.409864305 |
| 1423160_at   | 0.055672215  | 9.441759222 | 0.686930739  | 0.508710118 | 0.508710118 | -5.409898851 |
| 1434385_at   | -0.071710781 | 8.767308907 | -0.686884714 | 0.508737838 | 0.508737838 | -5.409927786 |
| 1457117_at   | -0.081246039 | 4.025101751 | -0.686788674 | 0.508795687 | 0.508795687 | -5.409988159 |
| 1434671_at   | 0.056277881  | 8.558078949 | 0.686786631  | 0.508796917 | 0.508796917 | -5.409989443 |
| 1431334_a_at | 0.073976803  | 7.089199137 | 0.686783534  | 0.508798783 | 0.508798783 | -5.40999139  |
| 1417154_at   | -0.076393898 | 7.365490016 | -0.686779627 | 0.508801136 | 0.508801136 | -5.409993846 |
| 1418206_at   | -0.061933923 | 7.11361512  | -0.686752533 | 0.508817456 | 0.508817456 | -5.410010876 |
| 1426654_at   | -0.042835426 | 8.283630543 | -0.686737311 | 0.508826626 | 0.508826626 | -5.410020443 |

|              |              |             |              |             |             |              |
|--------------|--------------|-------------|--------------|-------------|-------------|--------------|
| 1453622_s_at | -0.059959077 | 7.20527058  | -0.686696226 | 0.508851375 | 0.508851375 | -5.410046267 |
| 1441696_at   | 0.07470955   | 6.979752665 | 0.686676992  | 0.508862961 | 0.508862961 | -5.410058355 |
| 1435826_at   | 0.069677325  | 6.640205139 | 0.686650341  | 0.508879016 | 0.508879016 | -5.410075105 |
| 1453690_at   | -0.07703973  | 3.75318112  | -0.686649156 | 0.50887973  | 0.50887973  | -5.410075849 |
| 1435451_at   | 0.047939671  | 6.973337065 | 0.68663087   | 0.508890746 | 0.508890746 | -5.410087342 |
| 1416844_at   | 0.053391056  | 9.693810493 | 0.68657734   | 0.508922994 | 0.508922994 | -5.410120982 |
| 1424000_a_at | 0.045466192  | 13.30935033 | 0.686490953  | 0.508975039 | 0.508975039 | -5.410175265 |
| 1443991_at   | 0.073720779  | 6.359695815 | 0.68638618   | 0.509038165 | 0.509038165 | -5.410241094 |
| 1422822_at   | -0.062823996 | 6.858841952 | -0.686363105 | 0.509052069 | 0.509052069 | -5.410255591 |
| 1451526_at   | -0.053089979 | 8.577720434 | -0.686355933 | 0.50905639  | 0.50905639  | -5.410260097 |
| 1438191_a_at | -0.045960547 | 8.528532874 | -0.686343093 | 0.509064127 | 0.509064127 | -5.410268163 |
| 1441336_at   | 0.053187852  | 4.513522023 | 0.686281584  | 0.50910119  | 0.50910119  | -5.410306803 |
| 1418770_at   | -0.063658544 | 4.047889242 | -0.686230541 | 0.509131948 | 0.509131948 | -5.410338865 |
| 1422525_at   | -0.049305935 | 11.91905197 | -0.686145551 | 0.509183164 | 0.509183164 | -5.410392247 |
| 1457228_x_at | 0.070015766  | 6.931219268 | 0.686140722  | 0.509186074 | 0.509186074 | -5.41039528  |
| 1455734_at   | 0.058090708  | 7.714365593 | 0.686116181  | 0.509200864 | 0.509200864 | -5.410410693 |
| 1445775_at   | 0.048136596  | 4.630977197 | 0.686115433  | 0.509201314 | 0.509201314 | -5.410411162 |
| 1455297_at   | 0.062801796  | 8.437273957 | 0.686043188  | 0.509244854 | 0.509244854 | -5.410456533 |
| 1451558_at   | 0.056356904  | 8.428618954 | 0.686027031  | 0.509254591 | 0.509254591 | -5.410466679 |
| 1460376_a_at | -0.07129501  | 6.145881609 | -0.685997067 | 0.509272651 | 0.509272651 | -5.410485495 |
| 1422924_at   | -0.091256994 | 5.252302856 | -0.685983227 | 0.509280992 | 0.509280992 | -5.410494185 |
| 1429940_at   | -0.070169175 | 6.716856669 | -0.685950333 | 0.509300817 | 0.509300817 | -5.41051484  |
| 1422927_at   | 0.051370658  | 6.240270359 | 0.685926494  | 0.509315186 | 0.509315186 | -5.410529808 |
| 1454831_at   | -0.078484932 | 8.177066352 | -0.6858601   | 0.509355204 | 0.509355204 | -5.410571494 |
| 1445965_at   | 0.119024499  | 7.493984914 | 0.685800321  | 0.509391237 | 0.509391237 | -5.410609023 |
| 1422418_s_at | -0.059127218 | 9.191598743 | -0.685799543 | 0.509391706 | 0.509391706 | -5.410609512 |
| 1417656_at   | -0.058016476 | 6.450227675 | -0.685766944 | 0.509411357 | 0.509411357 | -5.410629976 |
| 1432544_at   | -0.052702528 | 4.301943254 | -0.685748916 | 0.509422224 | 0.509422224 | -5.410641293 |
| 1437468_x_at | 0.06061913   | 11.48478117 | 0.685667156  | 0.509471511 | 0.509471511 | -5.410692614 |
| 1456441_at   | -0.082419103 | 4.302378466 | -0.685645295 | 0.50948469  | 0.50948469  | -5.410706335 |
| 1443001_at   | 0.06731763   | 3.24092853  | 0.68564153   | 0.50948696  | 0.50948696  | -5.410708698 |
| 1457847_at   | -0.213060823 | 5.144612964 | -0.68564093  | 0.509487321 | 0.509487321 | -5.410709075 |
| 1455496_at   | 0.070740429  | 8.52645449  | 0.685629731  | 0.509494072 | 0.509494072 | -5.410716104 |
| 1457715_at   | -0.060150989 | 4.485971795 | -0.685477872 | 0.509585627 | 0.509585627 | -5.410811407 |
| 1441058_at   | 0.086859799  | 6.452604186 | 0.685474305  | 0.509587778 | 0.509587778 | -5.410813645 |
| 1452401_at   | 0.078620128  | 10.34677021 | 0.685434521  | 0.509611765 | 0.509611765 | -5.41083861  |
| 1460661_at   | 0.075846241  | 9.081345616 | 0.685415314  | 0.509623345 | 0.509623345 | -5.410850661 |
| 1447183_at   | -0.045276297 | 3.954380893 | -0.685383853 | 0.509642315 | 0.509642315 | -5.410870401 |
| 1421955_a_at | 0.054615089  | 13.02392032 | 0.685359241  | 0.509657156 | 0.509657156 | -5.410885844 |
| 1420688_a_at | 0.057709424  | 9.456495089 | 0.685292334  | 0.5096975   | 0.5096975   | -5.41092782  |
| 1428395_at   | 0.056194207  | 7.619930291 | 0.685188406  | 0.509760172 | 0.509760172 | -5.410993017 |
| 1428530_x_at | 0.046124049  | 12.60678987 | 0.685137445  | 0.509790904 | 0.509790904 | -5.411024982 |
| 1417315_at   | 0.042804877  | 8.712739161 | 0.685111188  | 0.509806739 | 0.509806739 | -5.411041451 |
| 1430147_a_at | 0.048739201  | 6.146866258 | 0.684940449  | 0.509909715 | 0.509909715 | -5.411148529 |
| 1420627_a_at | -0.051843946 | 4.599761833 | -0.684936271 | 0.509912236 | 0.509912236 | -5.411151149 |
| 1431422_a_at | -0.092020307 | 7.369320609 | -0.684930114 | 0.509915949 | 0.509915949 | -5.41115501  |
| 1439230_at   | -0.041887201 | 3.772703307 | -0.684918444 | 0.509922988 | 0.509922988 | -5.411162328 |
| 1458695_at   | -0.057624092 | 5.84325403  | -0.684901898 | 0.509932968 | 0.509932968 | -5.411172703 |
| 1426009_a_at | 0.0839075    | 8.758513347 | 0.684899671  | 0.509934311 | 0.509934311 | -5.411174099 |
| 1422738_at   | -0.079227045 | 9.221582687 | -0.684899037 | 0.509934694 | 0.509934694 | -5.411174497 |
| 1448770_a_at | 0.066527899  | 11.18592342 | 0.684865738  | 0.509954779 | 0.509954779 | -5.411195376 |
| 1439826_at   | -0.060726074 | 6.111961147 | -0.684819577 | 0.509982624 | 0.509982624 | -5.411224319 |
| 1416685_s_at | 0.044041801  | 11.33570084 | 0.684787562  | 0.510001936 | 0.510001936 | -5.411244391 |



|              |              |             |              |             |             |              |
|--------------|--------------|-------------|--------------|-------------|-------------|--------------|
| 1449144_at   | -0.053232117 | 9.900826376 | -0.684772061 | 0.510011286 | 0.510011286 | -5.411254109 |
| 1458535_at   | 0.047806514  | 6.773689095 | 0.684499359  | 0.510175805 | 0.510175805 | -5.411425046 |
| 1418220_at   | -0.060726981 | 7.88189587  | -0.684497244 | 0.510177081 | 0.510177081 | -5.411426371 |
| 1449615_s_at | -0.063690515 | 8.360227616 | -0.684475154 | 0.510190409 | 0.510190409 | -5.411440216 |
| 1430918_at   | -0.056832331 | 4.096948863 | -0.684471445 | 0.510192647 | 0.510192647 | -5.41144254  |
| 1451008_at   | -0.051783951 | 5.545281851 | -0.684450822 | 0.51020509  | 0.51020509  | -5.411455464 |
| 1454606_at   | -0.051492714 | 7.97531828  | -0.684450179 | 0.510205478 | 0.510205478 | -5.411455867 |
| 1424900_at   | 0.099938075  | 4.408351397 | 0.684436879  | 0.510213503 | 0.510213503 | -5.411464201 |
| 1441711_at   | -0.061350481 | 4.536351805 | -0.684429806 | 0.510217771 | 0.510217771 | -5.411468634 |
| 1450970_at   | -0.052091855 | 8.580983889 | -0.684348858 | 0.510266615 | 0.510266615 | -5.411519358 |
| 1431645_a_at | 0.043088821  | 10.37257659 | 0.684313476  | 0.510287965 | 0.510287965 | -5.411541528 |
| 1457274_at   | -0.050261257 | 3.26839541  | -0.684240762 | 0.510331844 | 0.510331844 | -5.411587085 |
| 1421265_a_at | 0.073319487  | 6.66128529  | 0.684139805  | 0.51039277  | 0.51039277  | -5.411650331 |
| 1458513_at   | 0.056082396  | 3.474389653 | 0.684129228  | 0.510399153 | 0.510399153 | -5.411656956 |
| 1421033_a_at | -0.056328655 | 9.349854405 | -0.684121497 | 0.510403819 | 0.510403819 | -5.411661799 |
| 1447103_at   | -0.05606528  | 3.731085989 | -0.684097264 | 0.510418445 | 0.510418445 | -5.411676979 |
| 1432456_at   | -0.054409691 | 3.405458097 | -0.684005124 | 0.510474055 | 0.510474055 | -5.41173469  |
| 1431308_at   | 0.06513022   | 4.035105661 | 0.683974331  | 0.510492641 | 0.510492641 | -5.411753976 |
| 1428541_at   | 0.071174194  | 7.145379301 | 0.683886066  | 0.510545918 | 0.510545918 | -5.411809252 |
| 1425230_at   | -0.126245974 | 5.236172094 | -0.683875518 | 0.510552285 | 0.510552285 | -5.411815857 |
| 1447548_at   | -0.053885384 | 3.589987082 | -0.68378808  | 0.510605065 | 0.510605065 | -5.411870608 |
| 1432966_at   | -0.051789857 | 3.584478305 | -0.683781932 | 0.510608777 | 0.510608777 | -5.411874458 |
| 1417241_at   | -0.052689943 | 8.64168263  | -0.683778141 | 0.510611066 | 0.510611066 | -5.411876831 |
| 1441133_at   | 0.050987215  | 5.742844319 | 0.683710267  | 0.510652039 | 0.510652039 | -5.411919327 |
| 1443020_at   | 0.091883217  | 7.091971322 | 0.683687323  | 0.510665891 | 0.510665891 | -5.411933691 |
| 1418232_s_at | 0.045645092  | 9.828249817 | 0.683652868  | 0.510686692 | 0.510686692 | -5.411955261 |
| 1431928_at   | 0.046395872  | 4.007521372 | 0.683650573  | 0.510688077 | 0.510688077 | -5.411956698 |
| 1439364_a_at | -0.051998353 | 11.09042876 | -0.68360428  | 0.510716026 | 0.510716026 | -5.411985677 |
| 1442816_at   | -0.065432476 | 3.611981771 | -0.683575781 | 0.510733232 | 0.510733232 | -5.412003517 |
| 1429145_at   | -0.072492001 | 7.625463913 | -0.683569803 | 0.510736841 | 0.510736841 | -5.412007259 |
| 1416327_at   | 0.042031972  | 9.826028916 | 0.683568697  | 0.510737509 | 0.510737509 | -5.412007951 |
| 1454561_at   | 0.084591142  | 4.148827565 | 0.683566645  | 0.510738748 | 0.510738748 | -5.412009236 |
| 1434905_at   | -0.095567901 | 8.923232949 | -0.683518253 | 0.510767965 | 0.510767965 | -5.412039526 |
| 1419372_at   | -0.051896924 | 8.143433805 | -0.683474015 | 0.510794676 | 0.510794676 | -5.412067214 |
| 1436676_at   | 0.057032708  | 4.508519651 | 0.683437021  | 0.510817013 | 0.510817013 | -5.412090367 |
| 1441382_at   | -0.050823157 | 3.159976915 | -0.683426112 | 0.5108236   | 0.5108236   | -5.412097195 |
| 1450873_at   | 0.050713672  | 9.419069677 | 0.683422579  | 0.510825733 | 0.510825733 | -5.412099405 |
| 1416061_at   | -0.065703634 | 9.326610751 | -0.683212589 | 0.510952538 | 0.510952538 | -5.412230806 |
| 1455663_at   | -0.062199511 | 8.405198112 | -0.683158503 | 0.510985202 | 0.510985202 | -5.412264645 |
| 1456314_x_at | 0.046637983  | 12.31992851 | 0.683084103  | 0.511030136 | 0.511030136 | -5.412311189 |
| 1445741_at   | -0.083260347 | 4.52376044  | -0.683051479 | 0.51104984  | 0.51104984  | -5.412331596 |
| 1445379_at   | 0.0631377    | 6.563545736 | 0.682891053  | 0.51114674  | 0.51114674  | -5.412431937 |
| 1453294_at   | 0.060024532  | 5.526177998 | 0.682852934  | 0.511169766 | 0.511169766 | -5.412455776 |
| 1441800_at   | -0.065720921 | 3.543009087 | -0.68285085  | 0.511171025 | 0.511171025 | -5.412457079 |
| 1439776_at   | -0.078091018 | 5.492575065 | -0.682767037 | 0.511221655 | 0.511221655 | -5.41250949  |
| 1452531_at   | 0.056837098  | 6.399156444 | 0.682694061  | 0.511265742 | 0.511265742 | -5.41255512  |
| 1421805_at   | 0.05955929   | 3.106526553 | 0.682623308  | 0.511308487 | 0.511308487 | -5.412599355 |
| 1436409_at   | 0.055385587  | 4.355838599 | 0.682612695  | 0.511314899 | 0.511314899 | -5.41260599  |
| 1437309_a_at | 0.056787074  | 11.07984148 | 0.682582913  | 0.511332893 | 0.511332893 | -5.412624609 |
| 1427588_a_at | -0.073489426 | 6.629827917 | -0.682574178 | 0.51133817  | 0.51133817  | -5.412630069 |
| 1443616_at   | 0.061139875  | 3.912289828 | 0.682562974  | 0.511344939 | 0.511344939 | -5.412637073 |
| 1416349_at   | 0.05000592   | 9.006800866 | 0.682437875  | 0.511420527 | 0.511420527 | -5.41271527  |
| 1447406_at   | 0.079492904  | 3.644255646 | 0.682397104  | 0.511445163 | 0.511445163 | -5.412740753 |

|              |              |             |              |             |             |              |
|--------------|--------------|-------------|--------------|-------------|-------------|--------------|
| 1421600_a_at | 0.050465952  | 6.20441662  | 0.682393795  | 0.511447162 | 0.511447162 | -5.41274282  |
| 1415677_at   | -0.040432843 | 8.899489444 | -0.682376562 | 0.511457576 | 0.511457576 | -5.412753591 |
| 1424601_at   | 0.065142767  | 6.850846687 | 0.682351574  | 0.511472676 | 0.511472676 | -5.412769208 |
| 1430014_at   | 0.052934241  | 4.022618981 | 0.682302052  | 0.511502602 | 0.511502602 | -5.412800156 |
| 1450575_at   | 0.073824426  | 3.663072999 | 0.682294293  | 0.51150729  | 0.51150729  | -5.412805005 |
| 1440406_at   | -0.047543771 | 5.024838309 | -0.68226081  | 0.511527525 | 0.511527525 | -5.412825928 |
| 1453593_at   | -0.05274963  | 7.64659957  | -0.682256235 | 0.511530289 | 0.511530289 | -5.412828787 |
| 1419639_at   | 0.066025057  | 9.816928935 | 0.682224095  | 0.511549713 | 0.511549713 | -5.41284887  |
| 1448491_at   | 0.052315212  | 9.790920719 | 0.682195978  | 0.511566705 | 0.511566705 | -5.412866438 |
| 1454952_s_at | 0.071342566  | 8.650641965 | 0.68219281   | 0.51156862  | 0.51156862  | -5.412868418 |
| 1427087_at   | 0.069737446  | 7.826946055 | 0.682114043  | 0.511616224 | 0.511616224 | -5.412917632 |
| 1446052_at   | -0.05221485  | 4.506519588 | -0.682090574 | 0.511630409 | 0.511630409 | -5.412932294 |
| 1421532_at   | -0.049965845 | 4.145285912 | -0.682009989 | 0.511679116 | 0.511679116 | -5.412982636 |
| 1449016_at   | 0.05262694   | 3.71716337  | 0.681976214  | 0.51169953  | 0.51169953  | -5.413003734 |
| 1435320_at   | 0.061615868  | 9.495118301 | 0.681966157  | 0.511705609 | 0.511705609 | -5.413010016 |
| 1450270_at   | -0.066968355 | 4.788333665 | -0.681964048 | 0.511706884 | 0.511706884 | -5.413011334 |
| 1441849_at   | -0.060669007 | 6.868049072 | -0.681911726 | 0.511738511 | 0.511738511 | -5.413044015 |
| 1422431_at   | 0.044513615  | 8.472118012 | 0.681755169  | 0.511833152 | 0.511833152 | -5.413141791 |
| 1416684_at   | 0.041509172  | 10.68356039 | 0.681730861  | 0.511847847 | 0.511847847 | -5.41315697  |
| 1437154_at   | 0.059415891  | 8.24040873  | 0.681708789  | 0.511861191 | 0.511861191 | -5.413170752 |
| 1423804_a_at | 0.161250582  | 7.46258356  | 0.681620128  | 0.511914794 | 0.511914794 | -5.413226112 |
| 1422166_at   | -0.065627255 | 3.563175206 | -0.681534742 | 0.511966419 | 0.511966419 | -5.41327942  |
| 1426248_at   | -0.045791336 | 9.623401143 | -0.681525718 | 0.511971876 | 0.511971876 | -5.413285054 |
| 1437628_s_at | 0.055788004  | 10.65867873 | 0.681456378  | 0.512013803 | 0.512013803 | -5.41332834  |
| 1415964_at   | 0.051872996  | 8.128200619 | 0.681435512  | 0.51202642  | 0.51202642  | -5.413341365 |
| 1455861_at   | 0.049684925  | 6.08132119  | 0.681403439  | 0.512045814 | 0.512045814 | -5.413361384 |
| 1458528_at   | 0.048123454  | 4.329900419 | 0.68135918   | 0.512072578 | 0.512072578 | -5.413389009 |
| 1452387_a_at | -0.082021382 | 9.589330634 | -0.681278623 | 0.512121294 | 0.512121294 | -5.413439286 |
| 1451969_s_at | 0.095958117  | 5.470463924 | 0.68126878   | 0.512127246 | 0.512127246 | -5.413445428 |
| 1447458_at   | 0.145369233  | 6.197280949 | 0.681262277  | 0.512131179 | 0.512131179 | -5.413449487 |
| 1450820_a_at | 0.055890726  | 3.737677323 | 0.681204398  | 0.512166182 | 0.512166182 | -5.413485606 |
| 1448916_at   | 0.067050132  | 8.549754464 | 0.681097889  | 0.5122306   | 0.5122306   | -5.413552065 |
| 1426720_at   | 0.066004554  | 6.039833815 | 0.681083454  | 0.512239331 | 0.512239331 | -5.413561072 |
| 1453187_at   | 0.07294776   | 7.848965865 | 0.681075984  | 0.512243849 | 0.512243849 | -5.413565732 |
| 1446649_at   | 0.056023395  | 3.544400161 | 0.681021461  | 0.512276827 | 0.512276827 | -5.413599748 |
| 1430232_at   | -0.08085761  | 6.148340986 | -0.680989468 | 0.512296178 | 0.512296178 | -5.413619707 |
| 1425774_at   | -0.085818879 | 4.199703849 | -0.68097662  | 0.51230395  | 0.51230395  | -5.413627723 |
| 1429165_at   | 0.067521191  | 6.88801244  | 0.68085401   | 0.512378118 | 0.512378118 | -5.413704205 |
| 1450183_a_at | -0.085845462 | 5.924382423 | -0.68084374  | 0.51238433  | 0.51238433  | -5.41371061  |
| 1434328_at   | -0.073279279 | 10.79261948 | -0.680836928 | 0.512388452 | 0.512388452 | -5.413714859 |
| 1433838_at   | 0.056145699  | 6.961269373 | 0.680773587  | 0.51242677  | 0.51242677  | -5.413754365 |
| 1451567_a_at | -0.077447052 | 3.871871799 | -0.680748028 | 0.512442233 | 0.512442233 | -5.413770305 |
| 1458537_at   | -0.057502258 | 4.91579376  | -0.680705735 | 0.512467819 | 0.512467819 | -5.41379668  |
| 1416307_at   | -0.054312458 | 9.152536669 | -0.680612515 | 0.512524219 | 0.512524219 | -5.413854809 |
| 1446863_at   | 0.053610967  | 3.717104152 | 0.680351161  | 0.512682364 | 0.512682364 | -5.414017744 |
| 1432591_at   | -0.081256793 | 4.87390621  | -0.680330466 | 0.512694888 | 0.512694888 | -5.414030644 |
| 1433034_at   | 0.062030604  | 4.730318756 | 0.680314748  | 0.5127044   | 0.5127044   | -5.414040441 |
| 1450100_a_at | 0.044566231  | 7.728460654 | 0.680311729  | 0.512706227 | 0.512706227 | -5.414042322 |
| 1452135_at   | 0.064313209  | 4.475516215 | 0.680281605  | 0.512724457 | 0.512724457 | -5.414061098 |
| 1438916_x_at | 0.078120859  | 7.707730351 | 0.680244696  | 0.512746794 | 0.512746794 | -5.414084101 |
| 1438948_x_at | 0.075890079  | 7.452788703 | 0.680240569  | 0.512749292 | 0.512749292 | -5.414086673 |
| 1428033_at   | -0.045327762 | 6.696153085 | -0.680230584 | 0.512755335 | 0.512755335 | -5.414092896 |
| 1418187_at   | -0.064041985 | 9.263804543 | -0.680221026 | 0.512761119 | 0.512761119 | -5.414098853 |

|              |              |             |              |             |             |              |
|--------------|--------------|-------------|--------------|-------------|-------------|--------------|
| 1423934_at   | -0.046584963 | 5.25201469  | -0.680199665 | 0.512774047 | 0.512774047 | -5.414112165 |
| 1430693_at   | 0.047336877  | 4.255388951 | 0.680154085  | 0.512801634 | 0.512801634 | -5.41414057  |
| 1454979_at   | -0.048675563 | 8.83354364  | -0.680141135 | 0.512809472 | 0.512809472 | -5.41414864  |
| 1437049_at   | -0.056981135 | 5.854784704 | -0.680140968 | 0.512809572 | 0.512809572 | -5.414148744 |
| 1419547_at   | -0.046981859 | 6.831796753 | -0.680110451 | 0.512828043 | 0.512828043 | -5.41416776  |
| 1425186_at   | 0.052156717  | 6.92713353  | 0.680101743  | 0.512833314 | 0.512833314 | -5.414173186 |
| 1436340_at   | 0.054978646  | 7.424202654 | 0.680048714  | 0.512865411 | 0.512865411 | -5.414206228 |
| 1433292_at   | -0.06499177  | 3.721189345 | -0.680022901 | 0.512881035 | 0.512881035 | -5.414222312 |
| 1417054_a_at | 0.064071226  | 10.37558137 | 0.680012828  | 0.512887132 | 0.512887132 | -5.414228587 |
| 1457443_at   | 0.07082029   | 4.086567039 | 0.679969811  | 0.512913171 | 0.512913171 | -5.414255388 |
| 1447039_at   | 0.062092724  | 4.155698781 | 0.679947601  | 0.512926615 | 0.512926615 | -5.414269225 |
| 1420112_at   | 0.085313403  | 4.889406484 | 0.679867853  | 0.51297489  | 0.51297489  | -5.414318904 |
| 1458135_at   | -0.051117923 | 4.279270432 | -0.679866479 | 0.512975722 | 0.512975722 | -5.41431976  |
| 1424621_at   | -0.05649028  | 8.310828691 | -0.679865254 | 0.512976464 | 0.512976464 | -5.414320524 |
| 1418916_a_at | 0.054430289  | 3.76763738  | 0.679827175  | 0.512999516 | 0.512999516 | -5.414344243 |
| 1419780_at   | -0.047478045 | 4.209078478 | -0.679822455 | 0.513002373 | 0.513002373 | -5.414347183 |
| 1452416_at   | 0.093262212  | 5.363969916 | 0.679790065  | 0.513021982 | 0.513021982 | -5.414367358 |
| 1446199_at   | -0.042718959 | 4.647616521 | -0.679757578 | 0.51304165  | 0.51304165  | -5.414387593 |
| 1440015_at   | -0.074376622 | 5.98076326  | -0.679694622 | 0.513079764 | 0.513079764 | -5.414426802 |
| 1417863_at   | 0.065185348  | 3.512762225 | 0.679653093  | 0.513104908 | 0.513104908 | -5.414452665 |
| 1456814_at   | 0.043320607  | 4.819822476 | 0.679647318  | 0.513108404 | 0.513108404 | -5.414456261 |
| 1434575_at   | 0.069358724  | 7.033606827 | 0.679640079  | 0.513112788 | 0.513112788 | -5.414460769 |
| 1421654_a_at | 0.06550203   | 10.1784875  | 0.679638448  | 0.513113775 | 0.513113775 | -5.414461785 |
| 1438917_x_at | 0.060817339  | 9.236811061 | 0.679618185  | 0.513126044 | 0.513126044 | -5.414474403 |
| 1434109_at   | 0.086203164  | 7.20090409  | 0.67961583   | 0.513127469 | 0.513127469 | -5.414475869 |
| 1435693_at   | 0.053509131  | 6.787000899 | 0.679596163  | 0.513139377 | 0.513139377 | -5.414488116 |
| 1432367_a_at | 0.042929317  | 8.645054625 | 0.679587814  | 0.513144432 | 0.513144432 | -5.414493315 |
| 1431461_at   | 0.079147778  | 3.648566528 | 0.67957952   | 0.513149455 | 0.513149455 | -5.41449848  |
| 1452465_at   | -0.053165577 | 4.280178298 | -0.679559038 | 0.513161856 | 0.513161856 | -5.414511234 |
| 1430976_a_at | 0.054565706  | 8.402260165 | 0.679533208  | 0.513177496 | 0.513177496 | -5.414527317 |
| 1447438_at   | -0.05750163  | 4.772420845 | -0.679519872 | 0.513185572 | 0.513185572 | -5.414535621 |
| 1419080_at   | 0.055792347  | 4.903261727 | 0.679500669  | 0.513197199 | 0.513197199 | -5.414547577 |
| 1425753_a_at | 0.056133378  | 7.94779039  | 0.679355393  | 0.513285172 | 0.513285172 | -5.414638021 |
| 1440768_x_at | -0.068407913 | 3.174148644 | -0.67933383  | 0.51329823  | 0.51329823  | -5.414651444 |
| 1441750_x_at | -0.09918327  | 4.419755501 | -0.679286737 | 0.51332675  | 0.51332675  | -5.414680758 |
| 1455839_at   | -0.05430813  | 9.221754421 | -0.679251892 | 0.513347853 | 0.513347853 | -5.414702446 |
| 1436899_at   | 0.061806299  | 8.600388155 | 0.679206606  | 0.51337528  | 0.51337528  | -5.414730633 |
| 1424875_at   | 0.057302826  | 7.35772302  | 0.679143058  | 0.513413769 | 0.513413769 | -5.414770182 |
| 1454803_a_at | -0.04684915  | 7.084823736 | -0.679055135 | 0.513467023 | 0.513467023 | -5.414824896 |
| 1429845_at   | -0.060165175 | 3.811161228 | -0.679019722 | 0.513488474 | 0.513488474 | -5.414846931 |
| 1435499_at   | -0.059498316 | 5.240894349 | -0.678990208 | 0.513506351 | 0.513506351 | -5.414865295 |
| 1433945_at   | -0.061210349 | 6.854978768 | -0.678978817 | 0.513513252 | 0.513513252 | -5.414872383 |
| 1441903_x_at | 0.061170266  | 4.28086708  | 0.678970529  | 0.513518272 | 0.513518272 | -5.41487754  |
| 1443218_at   | -0.045482081 | 3.984393359 | -0.678947366 | 0.513532303 | 0.513532303 | -5.414891952 |
| 1441658_at   | -0.044486841 | 3.678456823 | -0.678848672 | 0.51359209  | 0.51359209  | -5.414953352 |
| 1444645_at   | 0.076406543  | 6.804340245 | 0.678743161  | 0.513656012 | 0.513656012 | -5.415018985 |
| 1430659_at   | 0.057223006  | 4.058838522 | 0.678698742  | 0.513682923 | 0.513682923 | -5.415046612 |
| 1447819_x_at | 0.051552867  | 10.34593314 | 0.678558709  | 0.51376777  | 0.51376777  | -5.415133701 |
| 1454658_at   | 0.042864064  | 8.976725801 | 0.678489445  | 0.51380974  | 0.51380974  | -5.415176771 |
| 1460351_at   | 0.047976203  | 11.82517656 | 0.678459653  | 0.513827793 | 0.513827793 | -5.415195295 |
| 1438883_at   | 0.055562618  | 3.552259629 | 0.678420912  | 0.51385127  | 0.51385127  | -5.415219382 |
| 1452105_a_at | -0.081968567 | 8.695652108 | -0.67842087  | 0.513851295 | 0.513851295 | -5.415219408 |
| 1433703_s_at | -0.071475005 | 7.442478231 | -0.678350131 | 0.513894163 | 0.513894163 | -5.415263387 |

|              |              |             |              |             |             |              |
|--------------|--------------|-------------|--------------|-------------|-------------|--------------|
| 1427340_at   | -0.048203597 | 4.226608754 | -0.678342937 | 0.513898523 | 0.513898523 | -5.41526786  |
| 1426980_s_at | -0.086301443 | 4.449485774 | -0.678325288 | 0.513909219 | 0.513909219 | -5.415278831 |
| 1426665_at   | -0.064120158 | 8.284064916 | -0.678323151 | 0.513910514 | 0.513910514 | -5.41528016  |
| 1460221_at   | -0.049722415 | 11.53762324 | -0.678234828 | 0.513964042 | 0.513964042 | -5.415335063 |
| 1448409_at   | -0.079636677 | 4.202744724 | -0.678184299 | 0.513994667 | 0.513994667 | -5.415366471 |
| 1445735_at   | 0.047237109  | 3.299642997 | 0.678171646  | 0.514002336 | 0.514002336 | -5.415374335 |
| 1450221_at   | 0.060614522  | 3.488131285 | 0.678115522  | 0.514036353 | 0.514036353 | -5.415409217 |
| 1452041_at   | -0.058687633 | 8.741261646 | -0.678087723 | 0.514053203 | 0.514053203 | -5.415426493 |
| 1436198_at   | -0.046768734 | 5.683495686 | -0.678079184 | 0.514058379 | 0.514058379 | -5.4154318   |
| 1436203_a_at | -0.063142147 | 5.721674635 | -0.677996554 | 0.514108466 | 0.514108466 | -5.415483148 |
| 1441149_at   | -0.048688327 | 3.546775243 | -0.677975006 | 0.514121527 | 0.514121527 | -5.415496537 |
| 1457251_x_at | -0.054064504 | 6.734176455 | -0.677954378 | 0.514134032 | 0.514134032 | -5.415509355 |
| 1433904_at   | 0.042363926  | 4.433589613 | 0.677950019  | 0.514136674 | 0.514136674 | -5.415512063 |
| 1455478_at   | 0.050894075  | 8.032186358 | 0.677881959  | 0.514177933 | 0.514177933 | -5.415554351 |
| 1443220_at   | 0.064966219  | 6.077658192 | 0.677881076  | 0.514178469 | 0.514178469 | -5.4155549   |
| 1450529_at   | -0.093698102 | 4.22965062  | -0.677813991 | 0.514219138 | 0.514219138 | -5.415596577 |
| 1421484_at   | -0.042065759 | 3.51144926  | -0.677787418 | 0.514235248 | 0.514235248 | -5.415613085 |
| 1430024_at   | -0.058513335 | 6.733130823 | -0.677735555 | 0.514266692 | 0.514266692 | -5.415645303 |
| 1448318_at   | 0.051554377  | 9.851445359 | 0.677724296  | 0.514273518 | 0.514273518 | -5.415652297 |
| 1422758_at   | 0.103207947  | 7.791671145 | 0.67761427   | 0.514340228 | 0.514340228 | -5.415720636 |
| 1452858_at   | -0.051166135 | 6.771404306 | -0.67753779  | 0.514386603 | 0.514386603 | -5.415768134 |
| 1427190_at   | 0.070514799  | 7.928022358 | 0.677522054  | 0.514396145 | 0.514396145 | -5.415777906 |
| 1452860_at   | 0.063065711  | 8.988233572 | 0.677409058  | 0.514464666 | 0.514464666 | -5.415848071 |
| 1417695_a_at | -0.067641251 | 8.303818469 | -0.677392735 | 0.514474565 | 0.514474565 | -5.415858206 |
| 1448753_at   | 0.043250394  | 9.4647707   | 0.677357226  | 0.514496099 | 0.514496099 | -5.415880253 |
| 1419412_at   | -0.059722284 | 3.50432727  | -0.677337801 | 0.514507879 | 0.514507879 | -5.415892313 |
| 1450177_at   | -0.079331491 | 6.640913399 | -0.677326607 | 0.514514669 | 0.514514669 | -5.415899264 |
| 1434710_at   | -0.043466531 | 8.007654625 | -0.677321419 | 0.514517815 | 0.514517815 | -5.415902484 |
| 1418919_at   | 0.05310569   | 8.362669462 | 0.677312563  | 0.514523186 | 0.514523186 | -5.415907983 |
| 1420514_at   | -0.063627999 | 9.077039685 | -0.677278871 | 0.514543619 | 0.514543619 | -5.415928899 |
| 1422941_at   | 0.109056242  | 5.627048424 | 0.677179439  | 0.514603925 | 0.514603925 | -5.415990622 |
| 1457077_at   | -0.071243464 | 7.060151198 | -0.677128714 | 0.514634692 | 0.514634692 | -5.416022107 |
| 1417044_at   | -0.042401265 | 8.707256268 | -0.677118866 | 0.514640665 | 0.514640665 | -5.41602822  |
| 1445737_at   | -0.051584797 | 3.441449915 | -0.67706248  | 0.514674868 | 0.514674868 | -5.416063216 |
| 1429343_at   | -0.04978435  | 4.029313637 | -0.677055922 | 0.514678845 | 0.514678845 | -5.416067286 |
| 1420044_at   | -0.092104865 | 5.319748854 | -0.676958257 | 0.514738089 | 0.514738089 | -5.416127895 |
| 1433241_at   | -0.074482367 | 5.746047338 | -0.676928186 | 0.514756331 | 0.514756331 | -5.416146555 |
| 1417993_at   | -0.052317929 | 4.051667927 | -0.676891955 | 0.51477831  | 0.51477831  | -5.416169036 |
| 1421980_at   | 0.044984556  | 3.753666669 | 0.676889731  | 0.51477966  | 0.51477966  | -5.416170416 |
| 1421181_at   | -0.066558208 | 5.086358103 | -0.676876204 | 0.514787866 | 0.514787866 | -5.416178809 |
| 1426562_a_at | 0.094116365  | 6.528170949 | 0.676874095  | 0.514789146 | 0.514789146 | -5.416180118 |
| 1433124_at   | -0.067596514 | 4.134291534 | -0.67685289  | 0.51480201  | 0.51480201  | -5.416193274 |
| 1435377_at   | 0.077265919  | 8.617207076 | 0.676846847  | 0.514805676 | 0.514805676 | -5.416197024 |
| 1439531_at   | 0.062074144  | 6.959390736 | 0.6767226    | 0.514881056 | 0.514881056 | -5.416274106 |
| 1458909_at   | 0.060780776  | 5.501876016 | 0.676701842  | 0.514893651 | 0.514893651 | -5.416286984 |
| 1450083_at   | 0.05463902   | 8.644377531 | 0.676699445  | 0.514895106 | 0.514895106 | -5.41628847  |
| 1423742_at   | 0.048430699  | 7.800616016 | 0.676638051  | 0.514932356 | 0.514932356 | -5.416326553 |
| 1449169_at   | 0.049737318  | 8.521939981 | 0.67662908   | 0.5149378   | 0.5149378   | -5.416332118 |
| 1438446_x_at | 0.048533995  | 7.160610829 | 0.676628955  | 0.514937876 | 0.514937876 | -5.416332195 |
| 1443837_x_at | 0.074986631  | 6.46006293  | 0.676619832  | 0.514943411 | 0.514943411 | -5.416337854 |
| 1415731_at   | -0.058374679 | 7.97568577  | -0.676586949 | 0.514963364 | 0.514963364 | -5.416358249 |
| 1430889_a_at | 0.049944097  | 7.127996849 | 0.676569751  | 0.514973799 | 0.514973799 | -5.416368916 |
| 1452045_at   | 0.057679487  | 9.143425093 | 0.676567628  | 0.514975088 | 0.514975088 | -5.416370233 |

|              |              |             |              |             |             |              |
|--------------|--------------|-------------|--------------|-------------|-------------|--------------|
| 1420995_at   | 0.079798862  | 8.231310792 | 0.676542238  | 0.514990494 | 0.514990494 | -5.41638598  |
| 1417869_s_at | 0.049569923  | 8.575847543 | 0.676537116  | 0.514993602 | 0.514993602 | -5.416389156 |
| 1423965_at   | 0.057127216  | 8.655565923 | 0.676520874  | 0.515003458 | 0.515003458 | -5.41639923  |
| 1423343_at   | -0.050726014 | 3.881760334 | -0.676509942 | 0.515010092 | 0.515010092 | -5.41640601  |
| 1431391_at   | -0.081397682 | 4.675615255 | -0.676472123 | 0.515033041 | 0.515033041 | -5.416429463 |
| 1417628_at   | -0.076364479 | 7.578298439 | -0.676470122 | 0.515034256 | 0.515034256 | -5.416430704 |
| 1448112_at   | 0.049905381  | 11.2690149  | 0.676436765  | 0.515054498 | 0.515054498 | -5.41645139  |
| 1433510_x_at | 0.046816446  | 11.73776071 | 0.676429408  | 0.515058963 | 0.515058963 | -5.416455952 |
| 1416986_a_at | -0.102246046 | 6.729962964 | -0.676411727 | 0.515069693 | 0.515069693 | -5.416466916 |
| 1425391_a_at | -0.079963265 | 7.63793473  | -0.676411318 | 0.515069941 | 0.515069941 | -5.416467169 |
| 1438986_x_at | 0.044400765  | 13.89748533 | 0.676361681  | 0.515100064 | 0.515100064 | -5.416497948 |
| 1438142_s_at | 0.052491536  | 7.083142084 | 0.676308767  | 0.515132178 | 0.515132178 | -5.416530756 |
| 1418945_at   | 0.05179827   | 4.128914542 | 0.676287005  | 0.515145385 | 0.515145385 | -5.416544248 |
| 1429595_at   | -0.047379424 | 8.005517057 | -0.676278487 | 0.515150555 | 0.515150555 | -5.416549529 |
| 1437663_at   | -0.083452148 | 6.402837288 | -0.676276709 | 0.515151634 | 0.515151634 | -5.416550632 |
| 1449156_at   | 0.047330595  | 4.242361665 | 0.676211258  | 0.515191359 | 0.515191359 | -5.416591208 |
| 1423523_at   | 0.088989157  | 5.210192103 | 0.676211178  | 0.515191407 | 0.515191407 | -5.416591258 |
| 1427755_at   | 0.058020103  | 4.66278973  | 0.676156439  | 0.515224631 | 0.515224631 | -5.416625191 |
| 1456971_at   | 0.063464375  | 5.877911707 | 0.676154521  | 0.515225795 | 0.515225795 | -5.416626379 |
| 1438913_x_at | -0.046843453 | 6.85878325  | -0.676082601 | 0.51526945  | 0.51526945  | -5.41667096  |
| 1457822_at   | -0.0681063   | 6.430786428 | -0.676053319 | 0.515287225 | 0.515287225 | -5.416689109 |
| 1446163_at   | -0.052489436 | 4.837450808 | -0.676046059 | 0.515291631 | 0.515291631 | -5.416693608 |
| 1441410_at   | -0.076723099 | 6.577425699 | -0.676004856 | 0.515316643 | 0.515316643 | -5.416719145 |
| 1448023_at   | -0.047482505 | 5.129975628 | -0.675957347 | 0.515345483 | 0.515345483 | -5.416748588 |
| 1442092_at   | 0.081534705  | 3.909445879 | 0.675900504  | 0.515379991 | 0.515379991 | -5.416783813 |
| 1434115_at   | 0.092681001  | 7.265000175 | 0.675862336  | 0.515403163 | 0.515403163 | -5.416807465 |
| 1429207_at   | -0.063841285 | 8.722561168 | -0.675833444 | 0.515420703 | 0.515420703 | -5.416825367 |
| 1426591_at   | -0.047265195 | 4.470937125 | -0.675725221 | 0.515486409 | 0.515486409 | -5.416892419 |
| 1425280_at   | 0.061961318  | 6.77359488  | 0.675691213  | 0.515507058 | 0.515507058 | -5.416913487 |
| 1424692_at   | 0.07617707   | 7.832222563 | 0.675678595  | 0.515514719 | 0.515514719 | -5.416921304 |
| 1418664_at   | 0.051652878  | 9.738447828 | 0.675615099  | 0.515553273 | 0.515553273 | -5.416960638 |
| 1430611_at   | -0.055241303 | 4.092609007 | -0.675536662 | 0.515600902 | 0.515600902 | -5.417009222 |
| 1440218_at   | -0.054128671 | 4.056028523 | -0.675517335 | 0.515612638 | 0.515612638 | -5.417021192 |
| 1442652_at   | 0.053702647  | 4.64488867  | 0.675495946  | 0.515625627 | 0.515625627 | -5.41703444  |
| 1432186_at   | -0.051938138 | 4.464558023 | -0.67548707  | 0.515631017 | 0.515631017 | -5.417039936 |
| 1426707_at   | 0.062662274  | 8.276152149 | 0.675478235  | 0.515636382 | 0.515636382 | -5.417045408 |
| 1416980_at   | -0.089412264 | 4.544646719 | -0.675458345 | 0.51564846  | 0.51564846  | -5.417057726 |
| 1452986_at   | -0.083948093 | 4.374149374 | -0.67543687  | 0.515661502 | 0.515661502 | -5.417071026 |
| 1424594_at   | -0.042335427 | 9.556043871 | -0.675432313 | 0.515664269 | 0.515664269 | -5.417073848 |
| 1418956_at   | -0.069485354 | 4.575849644 | -0.675423797 | 0.515669441 | 0.515669441 | -5.417079122 |
| 1460490_at   | 0.055971834  | 3.537036141 | 0.67541353   | 0.515675676 | 0.515675676 | -5.41708548  |
| 1447726_at   | 0.046410624  | 3.012169485 | 0.67539845   | 0.515684834 | 0.515684834 | -5.417094819 |
| 1429775_a_at | -0.050739155 | 7.490992319 | -0.675397227 | 0.515685577 | 0.515685577 | -5.417095576 |
| 1448250_at   | -0.047667441 | 9.93025108  | -0.675354903 | 0.515711281 | 0.515711281 | -5.417121785 |
| 1436312_at   | 0.056313783  | 5.761699573 | 0.675327895  | 0.515727683 | 0.515727683 | -5.417138508 |
| 1435089_at   | 0.065170372  | 7.464278547 | 0.675311925  | 0.515737382 | 0.515737382 | -5.417148397 |
| 1437515_at   | -0.046251946 | 3.166527894 | -0.675257762 | 0.515770278 | 0.515770278 | -5.417181933 |
| 1444944_at   | 0.076705771  | 3.474884861 | 0.675253598  | 0.515772808 | 0.515772808 | -5.417184511 |
| 1450911_at   | -0.057767991 | 12.51026899 | -0.675248461 | 0.515775927 | 0.515775927 | -5.417187692 |
| 1421868_a_at | -0.071326594 | 3.790348076 | -0.675214428 | 0.515796598 | 0.515796598 | -5.417208762 |
| 1429390_at   | -0.130518618 | 8.962964227 | -0.675196473 | 0.515807504 | 0.515807504 | -5.417219878 |
| 1432803_at   | -0.073437155 | 3.551961968 | -0.675140522 | 0.515841488 | 0.515841488 | -5.417254516 |
| 1449238_at   | 0.047050997  | 3.863906897 | 0.675078127  | 0.515879389 | 0.515879389 | -5.41729314  |

|              |              |             |              |             |             |              |
|--------------|--------------|-------------|--------------|-------------|-------------|--------------|
| 1422080_at   | 0.049676001  | 3.606887446 | 0.675077174  | 0.515879968 | 0.515879968 | -5.41729373  |
| 1445158_at   | -0.043132108 | 3.806342717 | -0.674966375 | 0.515947274 | 0.515947274 | -5.417362308 |
| 1447966_a_at | -0.066780371 | 3.960826004 | -0.674942636 | 0.515961695 | 0.515961695 | -5.417377001 |
| 1455934_at   | -0.076244487 | 5.866173656 | -0.67490174  | 0.51598654  | 0.51598654  | -5.41740231  |
| 1446235_at   | 0.06257002   | 6.832945235 | 0.674897883  | 0.515988883 | 0.515988883 | -5.417404697 |
| 1416293_at   | 0.072291969  | 6.892377967 | 0.674852816  | 0.516016262 | 0.516016262 | -5.417432585 |
| 1444555_at   | -0.048428112 | 3.627738504 | -0.674791188 | 0.516053705 | 0.516053705 | -5.41747072  |
| 1453249_a_at | -0.055145277 | 4.004051352 | -0.674788362 | 0.516055421 | 0.516055421 | -5.417472468 |
| 1423702_at   | 0.058449658  | 11.6211815  | 0.674781365  | 0.516059672 | 0.516059672 | -5.417476798 |
| 1426176_a_at | 0.073399079  | 4.007997908 | 0.674779138  | 0.516061025 | 0.516061025 | -5.417478176 |
| 1437649_x_at | -0.048279985 | 11.78376453 | -0.674725669 | 0.516093512 | 0.516093512 | -5.417511259 |
| 1434718_at   | 0.059522869  | 7.421319507 | 0.674719389  | 0.516097328 | 0.516097328 | -5.417515144 |
| 1445600_at   | 0.076028985  | 7.74088071  | 0.674593894  | 0.516173581 | 0.516173581 | -5.417592782 |
| 1451104_a_at | -0.046291225 | 9.967182486 | -0.674574278 | 0.516185501 | 0.516185501 | -5.417604916 |
| 1427697_a_at | -0.064683047 | 5.586920086 | -0.67451714  | 0.516220222 | 0.516220222 | -5.41764026  |
| 1455122_at   | -0.061121366 | 5.184555478 | -0.674347765 | 0.516323155 | 0.516323155 | -5.417745012 |
| 1433952_at   | -0.056395597 | 9.045756157 | -0.674245993 | 0.516385009 | 0.516385009 | -5.417807943 |
| 1421691_at   | -0.06037659  | 4.066014229 | -0.674227547 | 0.516396221 | 0.516396221 | -5.417819349 |
| 1453838_at   | -0.066936128 | 4.083267955 | -0.674181526 | 0.516424193 | 0.516424193 | -5.417847802 |
| 1428860_at   | -0.088185046 | 5.089549711 | -0.674017309 | 0.516524014 | 0.516524014 | -5.41794932  |
| 1436465_at   | -0.047757988 | 4.067439814 | -0.674005162 | 0.516531399 | 0.516531399 | -5.417956829 |
| 1430075_at   | -0.041869525 | 8.568119581 | -0.67400108  | 0.51653388  | 0.51653388  | -5.417959352 |
| 1457691_at   | -0.053055664 | 5.125196145 | -0.673972537 | 0.516551232 | 0.516551232 | -5.417976994 |
| 1451739_at   | -0.10334336  | 7.120415304 | -0.673924422 | 0.516580482 | 0.516580482 | -5.418006733 |
| 1419319_at   | 0.044998325  | 4.378855221 | 0.673909923  | 0.516589296 | 0.516589296 | -5.418015693 |
| 1455205_a_at | 0.045570284  | 8.999705361 | 0.673862251  | 0.516618279 | 0.516618279 | -5.418045156 |
| 1438079_at   | -0.079806346 | 5.863082981 | -0.673746125 | 0.516688882 | 0.516688882 | -5.418116916 |
| 1436592_at   | 0.070417246  | 6.482458865 | 0.67373133   | 0.516697878 | 0.516697878 | -5.418126058 |
| 1454422_at   | 0.095713168  | 5.551828531 | 0.673701054  | 0.516716286 | 0.516716286 | -5.418144764 |
| 1416851_at   | -0.043337269 | 6.393460615 | -0.673665026 | 0.516738193 | 0.516738193 | -5.418167024 |
| 1455705_at   | 0.056766079  | 5.778088856 | 0.673547534  | 0.516809637 | 0.516809637 | -5.41823961  |
| 1419509_a_at | 0.061961085  | 8.360381164 | 0.673481703  | 0.51684967  | 0.51684967  | -5.418280274 |
| 1424534_at   | 0.085952594  | 6.451107469 | 0.673454276  | 0.516866349 | 0.516866349 | -5.418297215 |
| 1459566_at   | -0.087698877 | 5.28625033  | -0.673437145 | 0.516876768 | 0.516876768 | -5.418307796 |
| 1452666_a_at | -0.09342829  | 7.326589585 | -0.673435721 | 0.516877634 | 0.516877634 | -5.418308676 |
| 1459035_at   | -0.066929842 | 4.164456407 | -0.673380931 | 0.516910955 | 0.516910955 | -5.418342515 |
| 1455688_at   | -0.057346466 | 10.26958762 | -0.673327882 | 0.516943219 | 0.516943219 | -5.418375278 |
| 1451808_at   | -0.043399022 | 4.732479204 | -0.673305591 | 0.516956776 | 0.516956776 | -5.418389043 |
| 1427863_at   | 0.060238766  | 6.827858126 | 0.673261057  | 0.516983862 | 0.516983862 | -5.418416544 |
| 1434644_at   | 0.075980563  | 7.664039363 | 0.673255568  | 0.5169872   | 0.5169872   | -5.418419933 |
| 1433412_at   | -0.064750942 | 6.848150932 | -0.673250946 | 0.516990012 | 0.516990012 | -5.418422788 |
| 1436661_at   | 0.055628821  | 3.787623728 | 0.673214197  | 0.517012364 | 0.517012364 | -5.418445479 |
| 1447157_at   | -0.046257992 | 3.971415431 | -0.673211257 | 0.517014152 | 0.517014152 | -5.418447295 |
| 1454716_x_at | 0.04632779   | 11.33442557 | 0.673197967  | 0.517022236 | 0.517022236 | -5.4184555   |
| 1440257_at   | -0.060589792 | 4.653260029 | -0.673193433 | 0.517024993 | 0.517024993 | -5.4184583   |
| 1430583_at   | -0.060799091 | 4.378817256 | -0.673190286 | 0.517026908 | 0.517026908 | -5.418460243 |
| 1458268_s_at | -0.103441444 | 10.56555753 | -0.673135762 | 0.517060073 | 0.517060073 | -5.418493908 |
| 1419861_at   | 0.052235374  | 3.002386825 | 0.673124014  | 0.517067219 | 0.517067219 | -5.418501161 |
| 1458777_at   | 0.073373206  | 3.371833543 | 0.673119809  | 0.517069777 | 0.517069777 | -5.418503757 |
| 1440029_at   | 0.065081175  | 3.750164415 | 0.673118333  | 0.517070675 | 0.517070675 | -5.418504668 |
| 1457880_at   | -0.054039854 | 4.305545437 | -0.673045502 | 0.517114978 | 0.517114978 | -5.418549631 |
| 1438510_a_at | 0.062217506  | 10.38007307 | 0.672973209  | 0.517158957 | 0.517158957 | -5.418594258 |
| 1439940_at   | -0.052671619 | 4.506627364 | -0.67294871  | 0.51717386  | 0.51717386  | -5.41860938  |

|              |              |             |              |             |             |              |
|--------------|--------------|-------------|--------------|-------------|-------------|--------------|
| 1445132_at   | 0.060076343  | 4.922427974 | 0.672866617  | 0.517223804 | 0.517223804 | -5.418660048 |
| 1457556_at   | 0.083984571  | 4.338809224 | 0.672864955  | 0.517224815 | 0.517224815 | -5.418661074 |
| 1442840_at   | 0.056597403  | 4.286400314 | 0.672842378  | 0.517238551 | 0.517238551 | -5.418675008 |
| 1433302_at   | -0.041895605 | 4.20077987  | -0.672825273 | 0.517248958 | 0.517248958 | -5.418685564 |
| 1458306_at   | -0.072262445 | 4.899026416 | -0.672779702 | 0.517276684 | 0.517276684 | -5.418713688 |
| 1438902_a_at | -0.050090133 | 12.21487836 | -0.672720992 | 0.517312406 | 0.517312406 | -5.418749916 |
| 1448998_at   | 0.063607438  | 4.407688942 | 0.672686319  | 0.517333503 | 0.517333503 | -5.418771311 |
| 1444396_at   | -0.061707212 | 4.810209695 | -0.672667779 | 0.517344784 | 0.517344784 | -5.418782751 |
| 1447278_at   | -0.110892584 | 8.112774635 | -0.672646247 | 0.517357887 | 0.517357887 | -5.418796037 |
| 1456119_at   | -0.073443298 | 3.360749985 | -0.672637532 | 0.517363189 | 0.517363189 | -5.418801413 |
| 1443121_at   | 0.060949419  | 4.494735979 | 0.672635292  | 0.517364552 | 0.517364552 | -5.418802795 |
| 1415772_at   | 0.091808954  | 8.358254422 | 0.672609621  | 0.517380173 | 0.517380173 | -5.418818634 |
| 1417883_at   | -0.049458596 | 5.290981863 | -0.672536305 | 0.517424788 | 0.517424788 | -5.418863865 |
| 1453206_at   | 0.043938156  | 8.66803609  | 0.672482814  | 0.51745734  | 0.51745734  | -5.418896863 |
| 1426202_at   | -0.050921622 | 3.505423991 | -0.672475201 | 0.517461973 | 0.517461973 | -5.41890156  |
| 1433224_at   | -0.046502722 | 3.706863637 | -0.672445902 | 0.517479803 | 0.517479803 | -5.418919633 |
| 1435867_at   | 0.053275576  | 8.031061263 | 0.672361638  | 0.517531086 | 0.517531086 | -5.418971606 |
| 1436629_at   | -0.073524301 | 4.500877282 | -0.672313118 | 0.517560616 | 0.517560616 | -5.419001531 |
| 1425694_at   | -0.084363072 | 4.21431778  | -0.67230498  | 0.517565569 | 0.517565569 | -5.41900655  |
| 1455163_at   | 0.047331628  | 7.664911079 | 0.672276732  | 0.517582762 | 0.517582762 | -5.41902397  |
| 1417138_s_at | 0.045612547  | 10.11684467 | 0.672264449  | 0.517590238 | 0.517590238 | -5.419031545 |
| 1426859_at   | -0.058121816 | 5.495472384 | -0.672187884 | 0.517636841 | 0.517636841 | -5.419078759 |
| 1445998_at   | 0.086690747  | 4.207571112 | 0.672116682  | 0.517680183 | 0.517680183 | -5.419122662 |
| 1453410_at   | 0.042844753  | 3.192757031 | 0.672113288  | 0.517682248 | 0.517682248 | -5.419124754 |
| 1454760_at   | 0.044174474  | 10.34627162 | 0.672087313  | 0.51769806  | 0.51769806  | -5.419140769 |
| 1422494_s_at | 0.05694544   | 7.282438151 | 0.672032513  | 0.517731419 | 0.517731419 | -5.419174554 |
| 1441462_at   | -0.059276004 | 6.483405846 | -0.672030696 | 0.517732525 | 0.517732525 | -5.419175674 |
| 1438759_x_at | -0.130459559 | 8.077478529 | -0.671950487 | 0.517781355 | 0.517781355 | -5.419225121 |
| 1457801_at   | -0.053358074 | 7.259840512 | -0.671899757 | 0.517812239 | 0.517812239 | -5.419256391 |
| 1419068_at   | -0.042081683 | 7.208381768 | -0.671876128 | 0.517826624 | 0.517826624 | -5.419270955 |
| 1448572_at   | -0.054541788 | 4.440193584 | -0.671869746 | 0.51783051  | 0.51783051  | -5.419274888 |
| 1455060_at   | -0.05880221  | 8.355385552 | -0.67186795  | 0.517831603 | 0.517831603 | -5.419275995 |
| 1420790_x_at | -0.049917765 | 3.057613844 | -0.671820137 | 0.517860714 | 0.517860714 | -5.419305464 |
| 1440746_at   | -0.049169099 | 3.912843175 | -0.671783868 | 0.517882797 | 0.517882797 | -5.419327818 |
| 1443647_at   | -0.057097538 | 3.654695665 | -0.671688247 | 0.517941019 | 0.517941019 | -5.419386744 |
| 1434509_at   | 0.056674631  | 9.097956484 | 0.671656811  | 0.51796016  | 0.51796016  | -5.419406114 |
| 1443759_at   | -0.069391961 | 3.122921704 | -0.671572749 | 0.518011349 | 0.518011349 | -5.419457909 |
| 1456263_at   | -0.057306273 | 4.232849782 | -0.671538815 | 0.518032013 | 0.518032013 | -5.419478816 |
| 1430331_at   | 0.051890454  | 3.428296553 | 0.671524301  | 0.518040852 | 0.518040852 | -5.419487758 |
| 1456894_at   | -0.054536357 | 5.058598409 | -0.671501193 | 0.518054924 | 0.518054924 | -5.419501994 |
| 1445082_at   | 0.084091509  | 4.688231744 | 0.671492887  | 0.518059982 | 0.518059982 | -5.419507111 |
| 1430215_at   | 0.059816616  | 6.433220141 | 0.671478157  | 0.518068953 | 0.518068953 | -5.419516186 |
| 1431661_at   | -0.068089927 | 4.346264689 | -0.671443036 | 0.518090342 | 0.518090342 | -5.419537821 |
| 1417358_s_at | 0.050052074  | 6.074817689 | 0.67142493   | 0.518101369 | 0.518101369 | -5.419548974 |
| 1437931_at   | -0.056829303 | 5.016885943 | -0.67139864  | 0.51811738  | 0.51811738  | -5.419565168 |
| 1421595_at   | -0.062797224 | 3.797096327 | -0.671374739 | 0.518131936 | 0.518131936 | -5.419579891 |
| 1430831_at   | -0.086529168 | 5.550764866 | -0.671308602 | 0.518172217 | 0.518172217 | -5.419620626 |
| 1429217_at   | 0.057611272  | 6.550007021 | 0.671304851  | 0.518174502 | 0.518174502 | -5.419622936 |
| 1418262_at   | -0.053247027 | 5.336925533 | -0.671288645 | 0.518184373 | 0.518184373 | -5.419632918 |
| 1442866_at   | 0.046937947  | 5.025270756 | 0.671132955  | 0.518279205 | 0.518279205 | -5.419728794 |
| 1429706_at   | 0.04429128   | 3.768539046 | 0.671091846  | 0.518304247 | 0.518304247 | -5.419754106 |
| 1429013_at   | -0.094697663 | 4.941729443 | -0.671005034 | 0.518357131 | 0.518357131 | -5.419807555 |
| 1430191_at   | -0.055802888 | 8.033337859 | -0.670980439 | 0.518372114 | 0.518372114 | -5.419822697 |

|              |              |             |              |             |             |              |
|--------------|--------------|-------------|--------------|-------------|-------------|--------------|
| 1436932_at   | 0.057788678  | 6.118160134 | 0.670958376  | 0.518385555 | 0.518385555 | -5.419836279 |
| 1442794_at   | 0.050846207  | 3.521855917 | 0.670911765  | 0.518413952 | 0.518413952 | -5.419864973 |
| 1453679_at   | -0.054837719 | 3.269550588 | -0.670897262 | 0.518422788 | 0.518422788 | -5.419873901 |
| 1426606_at   | -0.06207164  | 5.861197153 | -0.670861451 | 0.518444606 | 0.518444606 | -5.419895944 |
| 1459762_x_at | 0.050127396  | 3.281559548 | 0.670859775  | 0.518445627 | 0.518445627 | -5.419896975 |
| 1454376_at   | 0.0415306    | 3.637284146 | 0.670849297  | 0.518452011 | 0.518452011 | -5.419903425 |
| 1449336_a_at | 0.048141173  | 8.180244625 | 0.670715019  | 0.518533826 | 0.518533826 | -5.419986068 |
| 1417897_at   | -0.062303414 | 6.794030367 | -0.670579121 | 0.518616636 | 0.518616636 | -5.420069693 |
| 1457585_at   | -0.063307089 | 4.459435733 | -0.670565471 | 0.518624954 | 0.518624954 | -5.420078092 |
| 1426314_at   | -0.052663119 | 6.380083142 | -0.67053139  | 0.518645723 | 0.518645723 | -5.420099062 |
| 1416609_at   | 0.0432182    | 9.152338837 | 0.670513394  | 0.518656689 | 0.518656689 | -5.420110133 |
| 1434633_at   | 0.074066631  | 8.260853177 | 0.670478119  | 0.518678187 | 0.518678187 | -5.420131836 |
| 1455635_at   | 0.057776276  | 6.191154658 | 0.670403694  | 0.518723545 | 0.518723545 | -5.420177621 |
| 1451937_at   | -0.047695328 | 3.759448182 | -0.670375974 | 0.518740439 | 0.518740439 | -5.420194673 |
| 1448616_at   | 0.097855582  | 6.402730666 | 0.670368223  | 0.518745163 | 0.518745163 | -5.420199441 |
| 1428601_at   | -0.075212291 | 7.558679553 | -0.67023636  | 0.518825534 | 0.518825534 | -5.420280545 |
| 1436574_at   | -0.134639924 | 6.198635598 | -0.670224926 | 0.518832503 | 0.518832503 | -5.420287577 |
| 1422319_at   | 0.069960753  | 4.900867952 | 0.67015057   | 0.518877827 | 0.518877827 | -5.420333305 |
| 1454357_at   | 0.049719927  | 3.468098687 | 0.670112613  | 0.518900965 | 0.518900965 | -5.420356646 |
| 1426705_s_at | 0.043358919  | 9.844529562 | 0.670107605  | 0.518904018 | 0.518904018 | -5.420359725 |
| 1436302_at   | 0.049021529  | 8.030706297 | 0.670090518  | 0.518914434 | 0.518914434 | -5.420370232 |
| 1437298_at   | 0.047277228  | 8.138160724 | 0.669942732  | 0.519004528 | 0.519004528 | -5.420461096 |
| 1450585_at   | 0.070237015  | 3.91351664  | 0.669931792  | 0.519011197 | 0.519011197 | -5.420467822 |
| 1432209_at   | 0.04439432   | 3.638309768 | 0.66990753   | 0.519025989 | 0.519025989 | -5.420482737 |
| 1434824_at   | -0.061326496 | 10.6569277  | -0.669834462 | 0.519070538 | 0.519070538 | -5.420527653 |
| 1420470_at   | -0.074879362 | 4.041643811 | -0.66968573  | 0.519161225 | 0.519161225 | -5.420619068 |
| 1415960_at   | 0.149747223  | 4.506361353 | 0.669673714  | 0.519168552 | 0.519168552 | -5.420626452 |
| 1458361_at   | -0.078150936 | 4.884070024 | -0.669654527 | 0.519180252 | 0.519180252 | -5.420638243 |
| 1432548_at   | 0.046387193  | 3.974281898 | 0.669643134  | 0.519187199 | 0.519187199 | -5.420645244 |
| 1454061_at   | 0.051570667  | 6.738069621 | 0.669623662  | 0.519199073 | 0.519199073 | -5.42065721  |
| 1434266_at   | -0.04497877  | 7.342195325 | -0.669600909 | 0.519212948 | 0.519212948 | -5.420671193 |
| 1440054_at   | 0.086368342  | 4.740971745 | 0.669555845  | 0.519240429 | 0.519240429 | -5.420698883 |
| 1457031_at   | -0.058732399 | 4.488481738 | -0.66950565  | 0.519271039 | 0.519271039 | -5.420729725 |
| 1439026_at   | 0.058650835  | 3.785586082 | 0.669401924  | 0.519334299 | 0.519334299 | -5.420793451 |
| 1455411_at   | -0.053542696 | 5.807948374 | -0.669355118 | 0.519362845 | 0.519362845 | -5.420822204 |
| 1449441_a_at | -0.043253809 | 9.215370194 | -0.669353862 | 0.519363612 | 0.519363612 | -5.420822976 |
| 1448034_at   | 0.058399819  | 4.72940593  | 0.66932906   | 0.519378739 | 0.519378739 | -5.420838212 |
| 1426919_at   | 0.047862913  | 3.11255289  | 0.669325501  | 0.519380909 | 0.519380909 | -5.420840397 |
| 1432392_at   | 0.068749155  | 5.740061317 | 0.66930406   | 0.519393987 | 0.519393987 | -5.420853568 |
| 1460257_a_at | 0.059945208  | 7.673817068 | 0.669286281  | 0.519404831 | 0.519404831 | -5.420864489 |
| 1442294_at   | 0.052735896  | 3.243611118 | 0.669230071  | 0.519439116 | 0.519439116 | -5.420899013 |
| 1440946_at   | 0.069718171  | 6.322490163 | 0.669209321  | 0.519451773 | 0.519451773 | -5.420911758 |
| 1432983_at   | 0.067918035  | 4.066070984 | 0.669192794  | 0.519461855 | 0.519461855 | -5.420921908 |
| 1458661_at   | 0.058682206  | 7.86588341  | 0.669186236  | 0.519465855 | 0.519465855 | -5.420925935 |
| 1455334_at   | 0.045819445  | 8.454362718 | 0.66918078   | 0.519469183 | 0.519469183 | -5.420929286 |
| 1442747_at   | -0.080291169 | 4.799029789 | -0.669174658 | 0.519472917 | 0.519472917 | -5.420933046 |
| 1459011_at   | 0.071866613  | 7.023405401 | 0.669141762  | 0.519492984 | 0.519492984 | -5.420953249 |
| 1424795_a_at | -0.068484991 | 4.356708637 | -0.669112049 | 0.519511109 | 0.519511109 | -5.420971495 |
| 1444466_at   | -0.07857505  | 5.268332854 | -0.669081957 | 0.519529466 | 0.519529466 | -5.420989974 |
| 1439138_at   | 0.084715375  | 7.620620689 | 0.669061058  | 0.519542214 | 0.519542214 | -5.421002807 |
| 1453498_x_at | 0.051550311  | 3.750812759 | 0.669042315  | 0.519553648 | 0.519553648 | -5.421014316 |
| 1447030_at   | 0.052036054  | 3.107195003 | 0.668953101  | 0.519608075 | 0.519608075 | -5.421069093 |
| 1442702_at   | 0.070353033  | 3.874370771 | 0.668928763  | 0.519622924 | 0.519622924 | -5.421084036 |



|              |              |             |              |             |             |              |
|--------------|--------------|-------------|--------------|-------------|-------------|--------------|
| 1445233_at   | -0.078203926 | 4.559856538 | -0.668893318 | 0.519644548 | 0.519644548 | -5.421105796 |
| 1440327_at   | 0.070810882  | 3.346322909 | 0.668847259  | 0.51967265  | 0.51967265  | -5.421134072 |
| 1434278_at   | -0.167517116 | 9.888815454 | -0.668833708 | 0.519680918 | 0.519680918 | -5.42114239  |
| 1450338_x_at | -0.063217948 | 3.308149916 | -0.668776781 | 0.519715652 | 0.519715652 | -5.421177334 |
| 1451359_at   | 0.071261606  | 8.762110529 | 0.668753319  | 0.519729968 | 0.519729968 | -5.421191735 |
| 1450426_at   | -0.05792644  | 3.72926135  | -0.668741223 | 0.519737348 | 0.519737348 | -5.421199159 |
| 1437386_at   | -0.061825477 | 6.619335436 | -0.66873575  | 0.519740688 | 0.519740688 | -5.421202519 |
| 1450736_a_at | 0.186942628  | 6.083905786 | 0.668584867  | 0.519832758 | 0.519832758 | -5.421295118 |
| 1429557_at   | -0.050190815 | 6.50407164  | -0.668582795 | 0.519834022 | 0.519834022 | -5.42129639  |
| 1433323_at   | 0.048586993  | 4.377682346 | 0.668540069  | 0.519860096 | 0.519860096 | -5.421322609 |
| 1444557_at   | 0.048918027  | 7.820372088 | 0.668466687  | 0.519904879 | 0.519904879 | -5.421367635 |
| 1426242_at   | -0.120134335 | 8.469485462 | -0.668443932 | 0.519918767 | 0.519918767 | -5.421381596 |
| 1437961_x_at | -0.063572809 | 3.453448207 | -0.668377091 | 0.519959561 | 0.519959561 | -5.421422604 |
| 1444108_at   | -0.04906803  | 6.62218449  | -0.668341329 | 0.519981388 | 0.519981388 | -5.421444543 |
| 1433702_at   | -0.047867749 | 8.993456363 | -0.668339646 | 0.519982415 | 0.519982415 | -5.421445575 |
| 1447794_x_at | -0.047082925 | 3.001105542 | -0.668274285 | 0.520022309 | 0.520022309 | -5.42148567  |
| 1435236_at   | 0.063052783  | 6.614941795 | 0.668244459  | 0.520040515 | 0.520040515 | -5.421503965 |
| 1445450_x_at | -0.041694309 | 3.000955295 | -0.668236052 | 0.520045646 | 0.520045646 | -5.421509121 |
| 1436773_x_at | -0.051285887 | 4.923460597 | -0.668214672 | 0.520058696 | 0.520058696 | -5.421522235 |
| 1449889_a_at | 0.045710082  | 10.65936067 | 0.668194561  | 0.520070972 | 0.520070972 | -5.42153457  |
| 1457292_at   | -0.050807447 | 9.240581873 | -0.668188748 | 0.520074521 | 0.520074521 | -5.421538136 |
| 1456938_at   | 0.04864101   | 4.175442173 | 0.668087413  | 0.520136379 | 0.520136379 | -5.421600283 |
| 1443533_at   | 0.04640462   | 8.293072544 | 0.668082001  | 0.520139683 | 0.520139683 | -5.421603602 |
| 1452612_at   | -0.049171793 | 8.126409807 | -0.667982767 | 0.520200264 | 0.520200264 | -5.421664452 |
| 1420613_at   | 0.044588196  | 11.3972687  | 0.667955451  | 0.52021694  | 0.52021694  | -5.421681201 |
| 1422322_at   | -0.051863482 | 3.932424199 | -0.667727018 | 0.520356413 | 0.520356413 | -5.42182124  |
| 1458955_at   | 0.066108517  | 3.965128889 | 0.667725705  | 0.520357214 | 0.520357214 | -5.421822045 |
| 1425525_a_at | -0.052713093 | 7.260210106 | -0.667703719 | 0.520370639 | 0.520370639 | -5.421835521 |
| 1451744_a_at | -0.078368979 | 6.082630924 | -0.667669148 | 0.52039175  | 0.52039175  | -5.421856711 |
| 1416433_at   | 0.041369312  | 8.866678636 | 0.667626265  | 0.520417936 | 0.520417936 | -5.421882993 |
| 1435048_at   | -0.066219752 | 4.388824776 | -0.667620625 | 0.52042138  | 0.52042138  | -5.421886449 |
| 1443307_at   | -0.046332659 | 5.523996262 | -0.667556295 | 0.520460665 | 0.520460665 | -5.421925873 |
| 1424390_at   | -0.040186347 | 9.54597821  | -0.667554459 | 0.520461786 | 0.520461786 | -5.421926998 |
| 1424216_a_at | 0.059957973  | 9.651313626 | 0.667548631  | 0.520465345 | 0.520465345 | -5.42193057  |
| 1418261_at   | -0.048663813 | 6.162288155 | -0.667453084 | 0.520523696 | 0.520523696 | -5.421989118 |
| 1440608_at   | -0.083781395 | 5.670079012 | -0.6674414   | 0.520530832 | 0.520530832 | -5.421996277 |
| 1424832_at   | 0.044463301  | 5.082115311 | 0.667406125  | 0.520552376 | 0.520552376 | -5.422017889 |
| 1454586_at   | -0.04999067  | 3.28262581  | -0.667284761 | 0.520626502 | 0.520626502 | -5.422092241 |
| 1460135_at   | -0.046729111 | 6.845091057 | -0.667261239 | 0.52064087  | 0.52064087  | -5.42210665  |
| 1441316_at   | 0.087797108  | 4.205255172 | 0.667260761  | 0.520641162 | 0.520641162 | -5.422106943 |
| 1437685_x_at | -0.076444983 | 6.998396179 | -0.667229616 | 0.520660186 | 0.520660186 | -5.422126021 |
| 1450992_a_at | 0.048247866  | 8.409417102 | 0.667175944  | 0.520692971 | 0.520692971 | -5.422158896 |
| 1457037_at   | -0.087951707 | 4.628854724 | -0.667115075 | 0.520730154 | 0.520730154 | -5.422196177 |
| 1429759_at   | 0.054967768  | 9.429862461 | 0.667112327  | 0.520731832 | 0.520731832 | -5.42219786  |
| 1429319_at   | 0.078125998  | 3.99367489  | 0.667084738  | 0.520748686 | 0.520748686 | -5.422214756 |
| 1433843_at   | -0.053214981 | 6.510618547 | -0.667052178 | 0.520768577 | 0.520768577 | -5.422234696 |
| 1431674_at   | -0.045876489 | 4.377600024 | -0.666917506 | 0.520850852 | 0.520850852 | -5.422317161 |
| 1450883_a_at | 0.08291727   | 5.4293257   | 0.666859805  | 0.520886106 | 0.520886106 | -5.422352489 |
| 1460581_a_at | 0.040333735  | 13.6220761  | 0.666814619  | 0.520913714 | 0.520913714 | -5.422380153 |
| 1439411_a_at | -0.072526846 | 10.06887058 | -0.666727232 | 0.52096711  | 0.52096711  | -5.422433648 |
| 1431272_at   | 0.056005614  | 3.754969838 | 0.666691199  | 0.520989128 | 0.520989128 | -5.422455704 |
| 1443301_at   | -0.053052093 | 3.17821642  | -0.666687919 | 0.520991132 | 0.520991132 | -5.422457711 |
| 1460278_a_at | -0.064638002 | 7.827296389 | -0.666523954 | 0.52109133  | 0.52109133  | -5.422558062 |

|              |              |             |              |             |             |              |
|--------------|--------------|-------------|--------------|-------------|-------------|--------------|
| 1418472_at   | -0.075792265 | 4.476584377 | -0.666432331 | 0.521147326 | 0.521147326 | -5.422614128 |
| 1457788_at   | 0.04761173   | 6.661096032 | 0.666414151  | 0.521158437 | 0.521158437 | -5.422625253 |
| 1456737_x_at | -0.048643812 | 8.384374647 | -0.66641124  | 0.521160216 | 0.521160216 | -5.422627033 |
| 1454729_at   | -0.058400922 | 6.225952251 | -0.66630076  | 0.521227742 | 0.521227742 | -5.422694627 |
| 1437645_at   | -0.089444808 | 6.789122908 | -0.66618025  | 0.521301403 | 0.521301403 | -5.422768346 |
| 1428697_at   | 0.047487307  | 8.486589392 | 0.666164476  | 0.521311046 | 0.521311046 | -5.422777995 |
| 1444021_at   | 0.058998689  | 4.512157795 | 0.66608017   | 0.521362583 | 0.521362583 | -5.422829559 |
| 1425625_at   | 0.060456546  | 3.775725323 | 0.666069084  | 0.52136936  | 0.52136936  | -5.422836339 |
| 1439196_at   | 0.067066855  | 8.151930957 | 0.665975611  | 0.521426504 | 0.521426504 | -5.422893502 |
| 1416524_at   | -0.044772303 | 10.08222553 | -0.665885495 | 0.521481599 | 0.521481599 | -5.422948605 |
| 1458558_at   | -0.060670104 | 3.455337178 | -0.665864721 | 0.521494301 | 0.521494301 | -5.422961307 |
| 1443214_at   | -0.075983599 | 4.551884512 | -0.66581276  | 0.521526071 | 0.521526071 | -5.422993075 |
| 1426810_at   | 0.055125615  | 9.937124329 | 0.665767898  | 0.521553502 | 0.521553502 | -5.423020502 |
| 1433507_a_at | 0.068112114  | 13.07885256 | 0.665748561  | 0.521565326 | 0.521565326 | -5.423032323 |
| 1454447_at   | 0.060513671  | 6.513686752 | 0.665735348  | 0.521573405 | 0.521573405 | -5.423040401 |
| 1444762_at   | -0.058023174 | 7.870306296 | -0.665725505 | 0.521579424 | 0.521579424 | -5.423046417 |
| 1441835_x_at | -0.055767407 | 6.953603366 | -0.665722776 | 0.521581092 | 0.521581092 | -5.423048085 |
| 1451232_at   | 0.051707134  | 8.522650468 | 0.665657883  | 0.521620774 | 0.521620774 | -5.423087753 |
| 1458308_at   | 0.045090553  | 5.394361161 | 0.665656339  | 0.521621718 | 0.521621718 | -5.423088697 |
| 1417436_at   | -0.04761095  | 3.757920552 | -0.665651548 | 0.521624648 | 0.521624648 | -5.423091625 |
| 1456724_x_at | -0.050878988 | 4.209927709 | -0.665627333 | 0.521639456 | 0.521639456 | -5.423106426 |
| 1425457_a_at | 0.092663448  | 10.16771601 | 0.665566224  | 0.521676825 | 0.521676825 | -5.423143775 |
| 1450379_at   | 0.055893746  | 8.727814042 | 0.665544241  | 0.521690269 | 0.521690269 | -5.42315721  |
| 1429416_at   | 0.064534362  | 5.090416965 | 0.665452062  | 0.521746643 | 0.521746643 | -5.423213542 |
| 1456707_at   | -0.077488351 | 3.996365859 | -0.665399044 | 0.521779069 | 0.521779069 | -5.423245939 |
| 1438672_at   | 0.120174724  | 6.442093744 | 0.665385822  | 0.521787156 | 0.521787156 | -5.423254018 |
| 1439899_at   | 0.074742439  | 4.070681505 | 0.665367756  | 0.521798205 | 0.521798205 | -5.423265057 |
| 1437697_at   | 0.066720196  | 5.793652697 | 0.665365816  | 0.521799392 | 0.521799392 | -5.423266242 |
| 1452132_at   | -0.05371049  | 7.446872475 | -0.665360612 | 0.521802575 | 0.521802575 | -5.423269422 |
| 1441639_at   | -0.047061765 | 4.209728001 | -0.665330642 | 0.521820906 | 0.521820906 | -5.423287733 |
| 1458820_at   | 0.083477608  | 5.49625946  | 0.665289799  | 0.521845888 | 0.521845888 | -5.423312686 |
| 1425958_at   | -0.053529198 | 4.497033503 | -0.665289184 | 0.521846264 | 0.521846264 | -5.423313062 |
| 1427468_at   | -0.051301263 | 9.184590073 | -0.665271503 | 0.521857079 | 0.521857079 | -5.423323864 |
| 1438818_at   | 0.053234275  | 4.796068819 | 0.665207531  | 0.521896209 | 0.521896209 | -5.423362944 |
| 1443796_at   | 0.054836861  | 5.061302895 | 0.665146188  | 0.521933733 | 0.521933733 | -5.423400416 |
| 1444234_at   | -0.057763027 | 3.768019028 | -0.665139098 | 0.521938071 | 0.521938071 | -5.423404746 |
| 1441714_at   | -0.045591053 | 3.178070052 | -0.664969441 | 0.52204186  | 0.52204186  | -5.423508364 |
| 1447337_at   | -0.052314989 | 5.555862035 | -0.664768503 | 0.522164802 | 0.522164802 | -5.423631055 |
| 1444454_at   | -0.081973565 | 4.663673596 | -0.664669095 | 0.522225631 | 0.522225631 | -5.423691741 |
| 1437966_at   | -0.053766293 | 4.038985376 | -0.664668763 | 0.522225834 | 0.522225834 | -5.423691944 |
| 1450419_at   | 0.056451596  | 4.146765788 | 0.664641254  | 0.522242668 | 0.522242668 | -5.423708735 |
| 1450671_at   | -0.05150921  | 3.904107343 | -0.664627103 | 0.522251327 | 0.522251327 | -5.423717373 |
| 1424434_at   | -0.06700719  | 7.181320144 | -0.664621506 | 0.522254753 | 0.522254753 | -5.42372079  |
| 1428113_at   | 0.05575527   | 10.070019   | 0.664575061  | 0.522283175 | 0.522283175 | -5.423749138 |
| 1426279_at   | 0.051176901  | 8.96449195  | 0.664539789  | 0.522304761 | 0.522304761 | -5.423770666 |
| 1452810_at   | -0.048215045 | 8.117245807 | -0.664529298 | 0.522311181 | 0.522311181 | -5.423777069 |
| 1440321_at   | -0.05331658  | 3.878396249 | -0.664523718 | 0.522314596 | 0.522314596 | -5.423780474 |
| 1437880_at   | -0.062780028 | 3.528571065 | -0.664522365 | 0.522315424 | 0.522315424 | -5.4237813   |
| 1421475_at   | 0.061894569  | 3.83912217  | 0.664478152  | 0.522342482 | 0.522342482 | -5.423808283 |
| 1450847_at   | 0.044806518  | 9.245562036 | 0.664474243  | 0.522344874 | 0.522344874 | -5.423810668 |
| 1444121_at   | -0.065209016 | 3.497353538 | -0.664354572 | 0.522418117 | 0.522418117 | -5.423883694 |
| 1417161_at   | 0.064377604  | 8.016516349 | 0.664310201  | 0.522445276 | 0.522445276 | -5.423910767 |
| 1418693_at   | 0.062278906  | 9.470515101 | 0.664262924  | 0.522474214 | 0.522474214 | -5.423939611 |

|              |              |             |              |             |             |              |
|--------------|--------------|-------------|--------------|-------------|-------------|--------------|
| 1438364_x_at | -0.060059875 | 3.54710512  | -0.664159853 | 0.522537306 | 0.522537306 | -5.424002489 |
| 1452220_at   | -0.055179345 | 9.470776036 | -0.664157192 | 0.522538935 | 0.522538935 | -5.424004113 |
| 1441583_at   | 0.064746512  | 4.020946927 | 0.664151962  | 0.522542137 | 0.522542137 | -5.424007303 |
| 1418180_at   | 0.062824509  | 10.89748834 | 0.66413825   | 0.522550531 | 0.522550531 | -5.424015668 |
| 1434527_at   | -0.063511945 | 3.128201285 | -0.6640721   | 0.522591026 | 0.522591026 | -5.424056017 |
| 1428109_at   | -0.066968366 | 8.117650584 | -0.664049373 | 0.522604939 | 0.522604939 | -5.424069878 |
| 1451765_a_at | -0.093156551 | 6.711513245 | -0.66400611  | 0.522631424 | 0.522631424 | -5.424096264 |
| 1460062_at   | 0.043890735  | 6.253697327 | 0.663953488  | 0.522663641 | 0.522663641 | -5.424128357 |
| 1457600_x_at | 0.04356487   | 6.283193271 | 0.663911828  | 0.522689147 | 0.522689147 | -5.424153762 |
| 1428774_at   | 0.057955514  | 10.55879044 | 0.663909482  | 0.522690583 | 0.522690583 | -5.424155192 |
| 1421798_at   | -0.043966297 | 5.103911622 | -0.663864383 | 0.522718196 | 0.522718196 | -5.424182693 |
| 1433263_at   | -0.044810726 | 3.725170465 | -0.663852027 | 0.522725761 | 0.522725761 | -5.424190227 |
| 1439114_at   | -0.055204287 | 3.484787373 | -0.663817116 | 0.522747137 | 0.522747137 | -5.424211514 |
| 1456844_at   | -0.049413016 | 3.305084111 | -0.663784799 | 0.522766925 | 0.522766925 | -5.424231218 |
| 1434324_x_at | -0.049044703 | 3.697713818 | -0.663760646 | 0.522781714 | 0.522781714 | -5.424245944 |
| 1428805_at   | 0.046299274  | 8.826362698 | 0.66374404   | 0.522791882 | 0.522791882 | -5.424256068 |
| 1437517_x_at | -0.055854176 | 3.478137572 | -0.663647572 | 0.522850953 | 0.522850953 | -5.424314877 |
| 1430053_a_at | 0.042244315  | 10.08793418 | 0.663643987  | 0.522853149 | 0.522853149 | -5.424317062 |
| 1425388_a_at | -0.050831711 | 6.308721434 | -0.663522126 | 0.522927776 | 0.522927776 | -5.424391341 |
| 1432273_a_at | 0.073217762  | 8.291803894 | 0.663501971  | 0.522940119 | 0.522940119 | -5.424403624 |
| 1445347_at   | -0.046182397 | 3.794352924 | -0.663489362 | 0.522947842 | 0.522947842 | -5.424411309 |
| 1457526_at   | 0.058638761  | 3.351783742 | 0.663433207  | 0.522982233 | 0.522982233 | -5.424445532 |
| 1452377_at   | -0.100045889 | 7.993831453 | -0.663382197 | 0.523013476 | 0.523013476 | -5.424476617 |
| 1427945_at   | 0.067411087  | 4.951610087 | 0.663346028  | 0.523035629 | 0.523035629 | -5.424498656 |
| 1420799_at   | 0.062338909  | 4.881274748 | 0.663338254  | 0.523040391 | 0.523040391 | -5.424503393 |
| 1418403_at   | -0.075473364 | 6.167670381 | -0.663316442 | 0.52305375  | 0.52305375  | -5.424516684 |
| 1431326_a_at | 0.074654705  | 5.13441056  | 0.663307378  | 0.523059302 | 0.523059302 | -5.424522207 |
| 1422433_s_at | 0.04969554   | 10.60518844 | 0.663270007  | 0.523082193 | 0.523082193 | -5.424544976 |
| 1457011_at   | 0.071018531  | 3.413223193 | 0.663224294  | 0.523110194 | 0.523110194 | -5.424572827 |
| 1421703_at   | 0.064916316  | 3.836894749 | 0.663211087  | 0.523118284 | 0.523118284 | -5.424580874 |
| 1420417_at   | -0.08988501  | 6.186100329 | -0.663194873 | 0.523128216 | 0.523128216 | -5.424590751 |
| 1433298_at   | -0.075474409 | 3.739625058 | -0.663158707 | 0.52315037  | 0.52315037  | -5.424612783 |
| 1458794_at   | 0.052445839  | 3.622708492 | 0.663152323  | 0.52315428  | 0.52315428  | -5.424616672 |
| 1451055_at   | 0.0573186    | 6.096722017 | 0.663111123  | 0.523179519 | 0.523179519 | -5.42464177  |
| 1437909_at   | -0.05423841  | 7.113456891 | -0.663088149 | 0.523193593 | 0.523193593 | -5.424655764 |
| 1421267_a_at | 0.056224748  | 7.261063512 | 0.663082834  | 0.523196849 | 0.523196849 | -5.424659002 |
| 1460269_at   | -0.054318378 | 6.018172596 | -0.663060259 | 0.523210679 | 0.523210679 | -5.424672752 |
| 1416251_at   | 0.05140585   | 10.90485418 | 0.66300935   | 0.523241867 | 0.523241867 | -5.42470376  |
| 1447249_at   | -0.054948366 | 6.323543015 | -0.66296486  | 0.523269124 | 0.523269124 | -5.424730856 |
| 1454051_at   | -0.069908704 | 5.413211145 | -0.662864228 | 0.523330779 | 0.523330779 | -5.424792139 |
| 1443092_at   | 0.064409157  | 5.897158636 | 0.662849063  | 0.523340071 | 0.523340071 | -5.424801373 |
| 1435764_a_at | -0.046122063 | 8.805033501 | -0.662841392 | 0.523344771 | 0.523344771 | -5.424806044 |
| 1452419_at   | -0.053840493 | 5.741137283 | -0.66282757  | 0.52335324  | 0.52335324  | -5.424814461 |
| 1455081_at   | -0.05708638  | 6.900762814 | -0.662756418 | 0.523396837 | 0.523396837 | -5.424857783 |
| 1460719_a_at | 0.058288563  | 4.866203753 | 0.662686363  | 0.523439765 | 0.523439765 | -5.424900434 |
| 1457258_at   | -0.056285259 | 3.691369643 | -0.662666762 | 0.523451776 | 0.523451776 | -5.424912368 |
| 1449374_at   | 0.052820733  | 4.371681196 | 0.662643319  | 0.523466141 | 0.523466141 | -5.424926639 |
| 1441873_at   | -0.055056988 | 2.994765974 | -0.662629523 | 0.523474596 | 0.523474596 | -5.424935037 |
| 1442243_at   | -0.046901164 | 5.038651434 | -0.662601201 | 0.523491952 | 0.523491952 | -5.424952278 |
| 1446175_at   | -0.066182049 | 3.934508082 | -0.662499986 | 0.52355398  | 0.52355398  | -5.425013885 |
| 1421879_at   | -0.050476959 | 6.845656103 | -0.66249766  | 0.523555406 | 0.523555406 | -5.425015301 |
| 1452050_at   | -0.087126873 | 6.579333202 | -0.662453786 | 0.523582295 | 0.523582295 | -5.425042004 |
| 1458668_at   | 0.065806699  | 4.982002697 | 0.66244903   | 0.523585209 | 0.523585209 | -5.425044898 |

|              |              |             |              |             |             |              |
|--------------|--------------|-------------|--------------|-------------|-------------|--------------|
| 1448041_at   | -0.061583371 | 4.696658214 | -0.662411764 | 0.523608049 | 0.523608049 | -5.425067577 |
| 1448171_at   | 0.094433184  | 6.847579519 | 0.662339161  | 0.523652549 | 0.523652549 | -5.425111759 |
| 1455031_at   | 0.062563502  | 8.610575479 | 0.662326668  | 0.523660199 | 0.523660199 | -5.425119353 |
| 1443360_x_at | -0.081521629 | 5.010122258 | -0.662294841 | 0.523679714 | 0.523679714 | -5.425138727 |
| 1441604_at   | -0.080229247 | 5.678338505 | -0.662279868 | 0.523688892 | 0.523688892 | -5.425147837 |
| 1430403_at   | -0.074649138 | 5.692455016 | -0.66226994  | 0.523694978 | 0.523694978 | -5.425153878 |
| 1438768_at   | 0.044586874  | 4.690833059 | 0.662216857  | 0.523727516 | 0.523727516 | -5.425186175 |
| 1455129_at   | 0.064722574  | 10.05424318 | 0.662134203  | 0.523778183 | 0.523778183 | -5.425236459 |
| 1437531_at   | -0.076087092 | 3.544251299 | -0.662063834 | 0.523821321 | 0.523821321 | -5.425279265 |
| 1436947_a_at | 0.049796704  | 10.93977348 | 0.661994786  | 0.523863652 | 0.523863652 | -5.425321263 |
| 1449253_at   | -0.071586381 | 5.046698092 | -0.661965323 | 0.523881715 | 0.523881715 | -5.425339183 |
| 1457254_x_at | -0.070311948 | 5.237253096 | -0.661951529 | 0.523890172 | 0.523890172 | -5.425347573 |
| 1430377_at   | -0.069799474 | 4.156331925 | -0.661899499 | 0.523922072 | 0.523922072 | -5.425379215 |
| 1451084_at   | 0.044328526  | 9.237880813 | 0.661876154  | 0.523936385 | 0.523936385 | -5.425393412 |
| 1434258_s_at | -0.04427404  | 8.655983112 | -0.661873383 | 0.523938084 | 0.523938084 | -5.425395097 |
| 1434494_at   | 0.059931035  | 5.800827562 | 0.661792622  | 0.523987603 | 0.523987603 | -5.425444207 |
| 1420551_at   | -0.101561057 | 4.506623165 | -0.661765681 | 0.524004122 | 0.524004122 | -5.425460588 |
| 1438865_at   | 0.061366048  | 7.015680706 | 0.661751741  | 0.52401267  | 0.52401267  | -5.425469064 |
| 1444844_at   | -0.053226821 | 5.082478853 | -0.661718626 | 0.524032975 | 0.524032975 | -5.425489198 |
| 1422012_at   | -0.060695635 | 4.088320876 | -0.66165877  | 0.52406968  | 0.52406968  | -5.425525589 |
| 1435771_at   | -0.066060854 | 8.695112785 | -0.661649264 | 0.524075508 | 0.524075508 | -5.425531368 |
| 1415847_at   | -0.05460184  | 4.335022519 | -0.661589839 | 0.52411195  | 0.52411195  | -5.425567493 |
| 1439914_at   | -0.056015678 | 4.858989975 | -0.661587671 | 0.52411328  | 0.52411328  | -5.425568811 |
| 1437633_at   | 0.074739046  | 8.575628456 | 0.661548673  | 0.524137196 | 0.524137196 | -5.425592516 |
| 1456052_at   | 0.057729634  | 4.385331677 | 0.661514861  | 0.524157932 | 0.524157932 | -5.425613069 |
| 1445521_at   | 0.050220495  | 5.405309444 | 0.661298924  | 0.524290372 | 0.524290372 | -5.425744301 |
| 1444974_at   | 0.057458439  | 5.701370577 | 0.661292488  | 0.52429432  | 0.52429432  | -5.425748211 |
| 1439405_x_at | -0.051448816 | 10.80667588 | -0.661268337 | 0.524309134 | 0.524309134 | -5.425762887 |
| 1443223_at   | 0.055704353  | 4.914789854 | 0.661228122  | 0.524333801 | 0.524333801 | -5.425787321 |
| 1435483_x_at | -0.077487919 | 5.463519759 | -0.661217036 | 0.524340601 | 0.524340601 | -5.425794057 |
| 1440628_at   | 0.049672944  | 3.745497854 | 0.661136208  | 0.524390184 | 0.524390184 | -5.425843164 |
| 1445889_at   | 0.054565931  | 3.921890676 | 0.661130097  | 0.524393932 | 0.524393932 | -5.425846876 |
| 1420572_at   | 0.063475442  | 4.780359382 | 0.661117827  | 0.52440146  | 0.52440146  | -5.42585433  |
| 1438011_at   | -0.057408594 | 8.373560938 | -0.661105312 | 0.524409137 | 0.524409137 | -5.425861933 |
| 1447561_at   | -0.044010223 | 3.743684274 | -0.661065849 | 0.524433346 | 0.524433346 | -5.425885905 |
| 1422839_at   | -0.058406998 | 3.920204693 | -0.661062277 | 0.524435538 | 0.524435538 | -5.425888076 |
| 1428012_at   | 0.065838986  | 3.591276718 | 0.661056466  | 0.524439102 | 0.524439102 | -5.425891605 |
| 1451606_at   | -0.063875528 | 4.235335757 | -0.661024521 | 0.5244587   | 0.5244587   | -5.425911009 |
| 1423366_at   | -0.052239584 | 3.970912963 | -0.660971741 | 0.524491081 | 0.524491081 | -5.425943068 |
| 1433778_at   | 0.051397456  | 9.382755356 | 0.660963279  | 0.524496272 | 0.524496272 | -5.425948207 |
| 1460073_at   | 0.055439408  | 5.312170802 | 0.660950539  | 0.524504089 | 0.524504089 | -5.425955945 |
| 1419690_at   | 0.04249856   | 7.273976679 | 0.660900243  | 0.524534947 | 0.524534947 | -5.425986492 |
| 1425304_s_at | 0.052395345  | 6.057998429 | 0.660897326  | 0.524536737 | 0.524536737 | -5.425988263 |
| 1433989_at   | -0.048841298 | 3.908376787 | -0.660846896 | 0.524567679 | 0.524567679 | -5.426018889 |
| 1452009_at   | -0.083746042 | 5.961867683 | -0.660802403 | 0.524594978 | 0.524594978 | -5.426045908 |
| 1441100_at   | -0.054658894 | 8.621770287 | -0.660713274 | 0.524649669 | 0.524649669 | -5.426100027 |
| 1419809_s_at | 0.045893555  | 7.942672459 | 0.660651024  | 0.524687868 | 0.524687868 | -5.426137821 |
| 1432561_at   | -0.063529617 | 4.775652973 | -0.660638589 | 0.524695498 | 0.524695498 | -5.42614537  |
| 1434062_at   | 0.047800038  | 8.756198502 | 0.660612125  | 0.524711739 | 0.524711739 | -5.426161436 |
| 1444237_at   | -0.06519409  | 7.072658005 | -0.660528788 | 0.524762882 | 0.524762882 | -5.426212026 |
| 1455789_x_at | 0.050514197  | 12.92670435 | 0.660519749  | 0.524768429 | 0.524768429 | -5.426217512 |
| 1455566_s_at | 0.046742867  | 7.978798632 | 0.660439795  | 0.524817498 | 0.524817498 | -5.426266042 |
| 1423479_at   | 0.047380325  | 8.850661618 | 0.660401221  | 0.524841173 | 0.524841173 | -5.426289453 |

|              |              |             |              |             |             |              |
|--------------|--------------|-------------|--------------|-------------|-------------|--------------|
| 1435088_at   | -0.061304302 | 9.129181595 | -0.660362661 | 0.524864841 | 0.524864841 | -5.426312855 |
| 1426727_s_at | 0.053888434  | 8.563144311 | 0.660346047  | 0.524875038 | 0.524875038 | -5.426322937 |
| 1444094_at   | -0.070984278 | 4.022278334 | -0.660279019 | 0.524916179 | 0.524916179 | -5.426363611 |
| 1447056_at   | 0.054772008  | 7.356135526 | 0.660265501  | 0.524924477 | 0.524924477 | -5.426371814 |
| 1416362_a_at | -0.059375666 | 10.31445432 | -0.660161262 | 0.524988463 | 0.524988463 | -5.426435061 |
| 1443427_at   | -0.05232106  | 5.2858485   | -0.660131484 | 0.525006742 | 0.525006742 | -5.426453127 |
| 1444936_at   | 0.045493862  | 3.520241267 | 0.660087188  | 0.525033935 | 0.525033935 | -5.42648     |
| 1428873_a_at | -0.059247104 | 8.65645659  | -0.659886506 | 0.525157141 | 0.525157141 | -5.426601726 |
| 1445765_at   | -0.111276028 | 6.935739681 | -0.659851321 | 0.525178745 | 0.525178745 | -5.426623064 |
| 1436809_a_at | 0.048413955  | 11.8161835  | 0.659835486  | 0.525188468 | 0.525188468 | -5.426632667 |
| 1454287_at   | 0.054623932  | 4.431407916 | 0.659804435  | 0.525207533 | 0.525207533 | -5.426651497 |
| 1432242_at   | 0.044678444  | 3.290754723 | 0.659704294  | 0.525269023 | 0.525269023 | -5.426712219 |
| 1436591_at   | -0.061810434 | 6.4507698   | -0.659664417 | 0.52529351  | 0.52529351  | -5.426736397 |
| 1431005_at   | 0.072647482  | 6.42194068  | 0.659432559  | 0.5254359   | 0.5254359   | -5.426876949 |
| 1448689_at   | 0.044133962  | 8.707507799 | 0.659406891  | 0.525451665 | 0.525451665 | -5.426892507 |
| 1429116_at   | -0.04557406  | 7.880955221 | -0.659373076 | 0.525472434 | 0.525472434 | -5.426913    |
| 1450278_at   | 0.057446429  | 4.980169067 | 0.659335214  | 0.525495689 | 0.525495689 | -5.426935946 |
| 1452039_a_at | 0.051454121  | 9.597631027 | 0.659270552  | 0.525535406 | 0.525535406 | -5.426975131 |
| 1423324_at   | 0.040168278  | 10.29219808 | 0.659227552  | 0.525561819 | 0.525561819 | -5.427001187 |
| 1456825_at   | -0.045331118 | 7.465410652 | -0.65913706  | 0.525617407 | 0.525617407 | -5.427056015 |
| 1425023_at   | 0.045252069  | 8.107881698 | 0.659090254  | 0.52564616  | 0.52564616  | -5.427084372 |
| 1444925_at   | -0.051347402 | 3.284306271 | -0.659000593 | 0.525701243 | 0.525701243 | -5.427138688 |
| 1427603_at   | -0.055401506 | 4.229340422 | -0.658954016 | 0.525729858 | 0.525729858 | -5.4271669   |
| 1422500_at   | -0.074428194 | 6.300729432 | -0.658943038 | 0.525736603 | 0.525736603 | -5.42717355  |
| 1452070_at   | 0.056092467  | 5.629164831 | 0.658860993  | 0.525787011 | 0.525787011 | -5.427223241 |
| 1446903_at   | -0.05525742  | 5.961302855 | -0.658835019 | 0.525802971 | 0.525802971 | -5.427238972 |
| 1446027_at   | 0.049204515  | 3.732079082 | 0.65877428   | 0.525840291 | 0.525840291 | -5.427275754 |
| 1424252_at   | 0.044841198  | 11.02026171 | 0.65877163   | 0.525841919 | 0.525841919 | -5.427277359 |
| 1444649_at   | -0.042025047 | 4.059676446 | -0.658759352 | 0.525849464 | 0.525849464 | -5.427284794 |
| 1418641_at   | -0.092257673 | 5.879363951 | -0.658675751 | 0.525900835 | 0.525900835 | -5.427335415 |
| 1422820_at   | -0.066598583 | 5.89310009  | -0.658669349 | 0.525904769 | 0.525904769 | -5.427339291 |
| 1437852_x_at | -0.047847053 | 10.10705016 | -0.658633815 | 0.525926605 | 0.525926605 | -5.427360806 |
| 1448941_at   | -0.0717064   | 6.84133975  | -0.6586081   | 0.525942408 | 0.525942408 | -5.427376374 |
| 1440151_s_at | -0.04384177  | 9.951974114 | -0.658591501 | 0.525952608 | 0.525952608 | -5.427386423 |
| 1441304_at   | -0.049531851 | 3.700766804 | -0.65859096  | 0.525952941 | 0.525952941 | -5.427386751 |
| 1459650_at   | -0.057925133 | 5.880518044 | -0.658551561 | 0.525977153 | 0.525977153 | -5.427410603 |
| 1452522_at   | -0.053548623 | 3.749722019 | -0.658541914 | 0.525983082 | 0.525983082 | -5.427416443 |
| 1454120_a_at | -0.06544063  | 6.803605683 | -0.658474944 | 0.52602424  | 0.52602424  | -5.427456982 |
| 1457687_at   | 0.05116443   | 9.441209751 | 0.658465837  | 0.526029836 | 0.526029836 | -5.427462495 |
| 1416648_at   | -0.068607289 | 10.41989455 | -0.658414996 | 0.526061084 | 0.526061084 | -5.427493268 |
| 1428411_at   | 0.04171692   | 10.0788395  | 0.658333288  | 0.526111303 | 0.526111303 | -5.42754272  |
| 1416279_at   | -0.060467586 | 8.793170915 | -0.658312872 | 0.526123852 | 0.526123852 | -5.427555075 |
| 1449511_a_at | 0.071781066  | 7.507709278 | 0.658307574  | 0.526127108 | 0.526127108 | -5.427558281 |
| 1451900_at   | -0.068079558 | 4.006091221 | -0.658302167 | 0.526130432 | 0.526130432 | -5.427561553 |
| 1447150_at   | 0.062913959  | 7.423872209 | 0.65822756   | 0.526176291 | 0.526176291 | -5.427606701 |
| 1439891_at   | -0.048692854 | 5.224414852 | -0.658197694 | 0.526194649 | 0.526194649 | -5.427624772 |
| 1435077_at   | -0.062084482 | 8.043557037 | -0.65818877  | 0.526200135 | 0.526200135 | -5.427630172 |
| 1417935_at   | 0.055839983  | 8.51077822  | 0.658188412  | 0.526200355 | 0.526200355 | -5.427630389 |
| 1459591_at   | -0.04206037  | 3.254818299 | -0.658175266 | 0.526208436 | 0.526208436 | -5.427638343 |
| 1432914_at   | 0.069661597  | 3.293286749 | 0.658171147  | 0.526210968 | 0.526210968 | -5.427640835 |
| 1419017_at   | 0.055186696  | 7.70303715  | 0.658046122  | 0.526287826 | 0.526287826 | -5.427716476 |
| 1454920_at   | -0.046865504 | 9.857201305 | -0.658024539 | 0.526301095 | 0.526301095 | -5.427729533 |
| 1420880_a_at | 0.042621225  | 12.11495341 | 0.657959759  | 0.526340921 | 0.526340921 | -5.427768719 |

|                    |              |             |              |             |             |              |
|--------------------|--------------|-------------|--------------|-------------|-------------|--------------|
| 1456020_at         | 0.067397773  | 5.821179583 | 0.657920942  | 0.526364786 | 0.526364786 | -5.427792198 |
| AFFX-r2-Ec-bioD-3_ | 0.059129052  | 11.94938252 | 0.657891025  | 0.52638318  | 0.52638318  | -5.427810293 |
| 1420192_at         | -0.043730721 | 4.217868018 | -0.657887265 | 0.526385492 | 0.526385492 | -5.427812567 |
| 1420801_at         | -0.071870511 | 4.040320602 | -0.657863463 | 0.526400126 | 0.526400126 | -5.427826963 |
| 1418800_at         | 0.057417898  | 4.658005671 | 0.657845785  | 0.526410996 | 0.526410996 | -5.427837655 |
| 1430197_a_at       | -0.099100961 | 4.911202729 | -0.657792789 | 0.526443581 | 0.526443581 | -5.427869705 |
| 1439621_at         | -0.062172475 | 3.806668822 | -0.657787678 | 0.526446724 | 0.526446724 | -5.427872796 |
| 1424052_at         | -0.058162154 | 8.676824894 | -0.657782652 | 0.526449814 | 0.526449814 | -5.427875835 |
| 1418038_s_at       | 0.043761621  | 8.64416749  | 0.657776141  | 0.526453818 | 0.526453818 | -5.427879772 |
| 1459169_at         | 0.07600045   | 3.372684795 | 0.657771375  | 0.526456748 | 0.526456748 | -5.427882654 |
| 1460499_at         | -0.084225768 | 5.786642483 | -0.657739375 | 0.526476425 | 0.526476425 | -5.427902005 |
| 1430264_at         | -0.050038048 | 6.883972988 | -0.657714272 | 0.52649186  | 0.52649186  | -5.427917185 |
| 1420078_at         | 0.061125457  | 3.627012937 | 0.657704765  | 0.526497707 | 0.526497707 | -5.427922934 |
| 1445066_at         | 0.067887203  | 3.717945961 | 0.657696115  | 0.526503026 | 0.526503026 | -5.427928164 |
| 1443493_at         | -0.065724925 | 5.270041927 | -0.657677784 | 0.526514263 | 0.526514263 | -5.427939214 |
| 1452358_at         | 0.083857014  | 3.408143065 | 0.657670281  | 0.526518912 | 0.526518912 | -5.427943785 |
| 1439232_at         | -0.050120645 | 3.666646301 | -0.657664777 | 0.526522296 | 0.526522296 | -5.427947113 |
| 1444125_at         | -0.04803277  | 3.643639595 | -0.657630558 | 0.526543339 | 0.526543339 | -5.427967802 |
| 1430799_at         | -0.043002389 | 3.893985629 | -0.657587427 | 0.526569862 | 0.526569862 | -5.427993879 |
| 1456138_at         | -0.076992198 | 5.354295995 | -0.657509277 | 0.526617923 | 0.526617923 | -5.428041124 |
| 1454566_at         | 0.042113453  | 8.123828716 | 0.657508073  | 0.526618663 | 0.526618663 | -5.428041852 |
| 1434685_at         | 0.063692747  | 3.523695362 | 0.657501166  | 0.526622911 | 0.526622911 | -5.428046027 |
| 1436822_x_at       | 0.050381106  | 13.15337036 | 0.657430555  | 0.526666338 | 0.526666338 | -5.428088709 |
| 1443601_at         | 0.083009925  | 3.18721608  | 0.657423168  | 0.526670882 | 0.526670882 | -5.428093175 |
| 1438472_at         | -0.063087894 | 3.682682884 | -0.65741954  | 0.526673113 | 0.526673113 | -5.428095368 |
| 1455549_at         | -0.043767653 | 8.904351192 | -0.657385979 | 0.526693755 | 0.526693755 | -5.428115653 |
| 1427335_at         | 0.052861614  | 5.653002388 | 0.657364195  | 0.526707153 | 0.526707153 | -5.428128819 |
| 1422007_at         | -0.081136572 | 6.573530692 | -0.657300151 | 0.526746544 | 0.526746544 | -5.428167524 |
| 1419934_at         | -0.046712382 | 5.026711821 | -0.657280713 | 0.526758501 | 0.526758501 | -5.428179272 |
| 1435537_at         | -0.054460181 | 9.773137619 | -0.657131622 | 0.52685021  | 0.52685021  | -5.428269361 |
| 1448692_at         | -0.097674303 | 7.408893937 | -0.657115627 | 0.52686005  | 0.52686005  | -5.428279025 |
| 1428624_at         | -0.053877123 | 10.54364559 | -0.657101949 | 0.526868464 | 0.526868464 | -5.428287289 |
| 1443888_at         | 0.041855243  | 4.337780213 | 0.657074165  | 0.526885557 | 0.526885557 | -5.428304075 |
| 1422378_at         | -0.064782124 | 3.468361869 | -0.657071983 | 0.526886899 | 0.526886899 | -5.428305393 |
| 1429780_at         | 0.060751519  | 3.274718593 | 0.657067221  | 0.526889828 | 0.526889828 | -5.42830827  |
| 1456378_s_at       | 0.05975224   | 8.949862138 | 0.657060959  | 0.526893681 | 0.526893681 | -5.428312054 |
| 1440044_at         | -0.053581113 | 4.820515015 | -0.657046923 | 0.526902315 | 0.526902315 | -5.428320533 |
| 1450184_s_at       | 0.07493119   | 6.653011661 | 0.657014457  | 0.526922288 | 0.526922288 | -5.428340146 |
| 1452487_x_at       | -0.068206382 | 3.856515726 | -0.65700047  | 0.526930894 | 0.526930894 | -5.428348596 |
| 1429765_at         | -0.068394521 | 7.177244861 | -0.656788384 | 0.527061382 | 0.527061382 | -5.428476696 |
| 1432618_at         | 0.083883572  | 4.057344994 | 0.656645248  | 0.527149459 | 0.527149459 | -5.428563129 |
| 1421636_at         | -0.084196322 | 4.4655565   | -0.656594632 | 0.527180607 | 0.527180607 | -5.42859369  |
| 1434560_at         | 0.063768506  | 5.841929206 | 0.656563363  | 0.52719985  | 0.52719985  | -5.428612568 |
| 1421870_at         | 0.044964229  | 10.66280152 | 0.656552632  | 0.527206453 | 0.527206453 | -5.428619047 |
| 1443115_at         | 0.042342334  | 6.920925211 | 0.656516932  | 0.527228424 | 0.527228424 | -5.428640599 |
| 1448772_at         | 0.042862616  | 9.715793436 | 0.656462607  | 0.527261857 | 0.527261857 | -5.428673393 |
| 1453175_at         | -0.050060287 | 7.886574116 | -0.656442381 | 0.527274305 | 0.527274305 | -5.428685602 |
| 1456715_at         | 0.074439258  | 7.467304615 | 0.656394188  | 0.527303966 | 0.527303966 | -5.428714692 |
| 1434365_a_at       | 0.08552951   | 7.091822053 | 0.656317399  | 0.527351229 | 0.527351229 | -5.428761038 |
| 1450665_at         | 0.045191038  | 7.829023081 | 0.656305211  | 0.527358731 | 0.527358731 | -5.428768394 |
| 1431743_a_at       | -0.075341548 | 3.72929589  | -0.656289954 | 0.527368122 | 0.527368122 | -5.428777602 |
| 1444832_at         | 0.041561777  | 4.141585699 | 0.656267605  | 0.527381878 | 0.527381878 | -5.428791089 |
| 1437811_x_at       | 0.067115629  | 7.935035195 | 0.656180524  | 0.527435481 | 0.527435481 | -5.428843638 |

|              |              |             |              |             |             |              |
|--------------|--------------|-------------|--------------|-------------|-------------|--------------|
| 1432614_at   | 0.081089642  | 4.207275347 | 0.656161953  | 0.527446912 | 0.527446912 | -5.428854843 |
| 1423625_a_at | 0.052514846  | 9.077220389 | 0.656142843  | 0.527458676 | 0.527458676 | -5.428866374 |
| 1446198_at   | 0.095490999  | 4.499465959 | 0.656131098  | 0.527465907 | 0.527465907 | -5.428873461 |
| 1420064_s_at | 0.083133637  | 3.391956385 | 0.656126067  | 0.527469004 | 0.527469004 | -5.428876497 |
| 1432735_at   | -0.051155166 | 6.411503479 | -0.656111678 | 0.527477861 | 0.527477861 | -5.428885178 |
| 1420757_at   | -0.235185538 | 4.318099317 | -0.656086373 | 0.527493439 | 0.527493439 | -5.428900446 |
| 1422904_at   | -0.045591751 | 7.372797401 | -0.656082999 | 0.527495516 | 0.527495516 | -5.428902481 |
| 1420347_at   | 0.283479243  | 9.610549677 | 0.656075534  | 0.527500111 | 0.527500111 | -5.428906985 |
| 1425916_at   | 0.04454421   | 4.436589263 | 0.65594792   | 0.527578675 | 0.527578675 | -5.428983971 |
| 1416059_at   | -0.048278861 | 9.970808423 | -0.655821278 | 0.527656648 | 0.527656648 | -5.429060357 |
| 1426130_at   | -0.050861827 | 4.84374308  | -0.655800038 | 0.527669726 | 0.527669726 | -5.429073167 |
| 1428070_at   | -0.07102509  | 8.201728961 | -0.655799655 | 0.527669962 | 0.527669962 | -5.429073398 |
| 1449691_at   | -0.074351472 | 5.323589805 | -0.655724349 | 0.527716331 | 0.527716331 | -5.429118812 |
| 1453556_x_at | -0.154272619 | 7.796033141 | -0.655711085 | 0.527724498 | 0.527724498 | -5.42912681  |
| 1424568_at   | -0.054038002 | 6.360974315 | -0.655676669 | 0.527745691 | 0.527745691 | -5.429147564 |
| 1443776_at   | -0.042710701 | 3.691616183 | -0.655641755 | 0.52776719  | 0.52776719  | -5.429168616 |
| 1428201_at   | 0.041112835  | 10.13067969 | 0.65562731   | 0.527776086 | 0.527776086 | -5.429177326 |
| 1428829_at   | 0.051946561  | 7.215672029 | 0.655626102  | 0.52777683  | 0.52777683  | -5.429178054 |
| 1420830_x_at | 0.045932886  | 12.21996044 | 0.65560011   | 0.527792836 | 0.527792836 | -5.429193726 |
| 1443021_at   | -0.057819976 | 4.242132708 | -0.655541465 | 0.527828951 | 0.527828951 | -5.429229083 |
| 1442953_at   | 0.10459514   | 5.380189193 | 0.655485264  | 0.527863562 | 0.527863562 | -5.429262964 |
| 1441851_x_at | -0.05310344  | 6.21895614  | -0.655484961 | 0.527863749 | 0.527863749 | -5.429263147 |
| 1455276_x_at | -0.053440023 | 5.858358207 | -0.655446507 | 0.527887432 | 0.527887432 | -5.429286327 |
| 1440980_at   | 0.040256758  | 4.227984121 | 0.655416047  | 0.527906192 | 0.527906192 | -5.429304688 |
| 1420898_at   | -0.064011538 | 6.038044049 | -0.655370289 | 0.527934374 | 0.527934374 | -5.429332269 |
| 1427873_at   | 0.044169865  | 3.712162016 | 0.655251977  | 0.528007247 | 0.528007247 | -5.429403575 |
| 1455697_at   | -0.056983607 | 6.079765765 | -0.655184034 | 0.528049098 | 0.528049098 | -5.429444518 |
| 1427713_x_at | 0.059202621  | 3.923544283 | 0.655180635  | 0.528051192 | 0.528051192 | -5.429446566 |
| 1420808_at   | 0.047802095  | 10.02596223 | 0.655096763  | 0.528102858 | 0.528102858 | -5.429497103 |
| 1457455_at   | 0.145317276  | 7.68392611  | 0.65497317   | 0.528178998 | 0.528178998 | -5.429571563 |
| 1451548_at   | -0.044238263 | 2.991082843 | -0.654962937 | 0.528185303 | 0.528185303 | -5.429577727 |
| 1432163_at   | -0.04670433  | 3.619828141 | -0.654960456 | 0.528186831 | 0.528186831 | -5.429579222 |
| 1423768_at   | 0.054721443  | 6.317275249 | 0.654812148  | 0.528278207 | 0.528278207 | -5.429668554 |
| 1440409_at   | 0.048323679  | 3.075222391 | 0.654741808  | 0.528321547 | 0.528321547 | -5.429710915 |
| 1425973_at   | -0.056263236 | 4.142222752 | -0.65471396  | 0.528338707 | 0.528338707 | -5.429727685 |
| 1449096_at   | -0.066065445 | 8.6828006   | -0.654644435 | 0.528381549 | 0.528381549 | -5.429769551 |
| 1442423_at   | 0.050332155  | 3.549133093 | 0.654593782  | 0.528412763 | 0.528412763 | -5.42980005  |
| 1433404_at   | -0.057092465 | 3.521330351 | -0.654593317 | 0.528413049 | 0.528413049 | -5.42980033  |
| 1445157_at   | -0.084202167 | 5.197428081 | -0.654554079 | 0.52843723  | 0.52843723  | -5.429823954 |
| 1431379_a_at | 0.045637328  | 3.579144668 | 0.654516789  | 0.52846021  | 0.52846021  | -5.429846404 |
| 1454193_at   | 0.066415593  | 4.128807424 | 0.654410433  | 0.528525758 | 0.528525758 | -5.42991043  |
| 1427840_at   | 0.068313371  | 3.891666125 | 0.654410174  | 0.528525918 | 0.528525918 | -5.429910586 |
| 1433108_at   | -0.045895853 | 3.701843899 | -0.65439822  | 0.528533285 | 0.528533285 | -5.429917781 |
| 1447153_x_at | 0.086307849  | 5.252673379 | 0.654239982  | 0.528630817 | 0.528630817 | -5.430013019 |
| 1442050_at   | -0.045929699 | 7.855201025 | -0.654181757 | 0.528666707 | 0.528666707 | -5.430048058 |
| 1460374_at   | -0.073348387 | 3.602219214 | -0.654112758 | 0.52870924  | 0.52870924  | -5.430089576 |
| 1437696_at   | 0.073610344  | 7.400300434 | 0.654111183  | 0.528710211 | 0.528710211 | -5.430090524 |
| 1452054_at   | -0.052774225 | 6.895606337 | -0.65408746  | 0.528724835 | 0.528724835 | -5.430104797 |
| 1452364_at   | 0.085256149  | 8.742742655 | 0.65404791   | 0.528749217 | 0.528749217 | -5.430128593 |
| 1459526_at   | 0.043151282  | 5.672630361 | 0.654007046  | 0.528774409 | 0.528774409 | -5.430153178 |
| 1421072_at   | -0.081098914 | 8.625620421 | -0.653982769 | 0.528789375 | 0.528789375 | -5.430167783 |
| 1441237_at   | -0.062432511 | 4.206430327 | -0.653950175 | 0.52880947  | 0.52880947  | -5.43018739  |
| 1436849_x_at | -0.055205455 | 9.151971699 | -0.65394041  | 0.52881549  | 0.52881549  | -5.430193265 |

|              |              |             |              |             |             |              |
|--------------|--------------|-------------|--------------|-------------|-------------|--------------|
| 1455494_at   | -0.119852004 | 11.96404676 | -0.653886231 | 0.528848893 | 0.528848893 | -5.430225855 |
| 1448990_a_at | 0.047933063  | 8.988718667 | 0.653885268  | 0.528849487 | 0.528849487 | -5.430226434 |
| 1420932_at   | -0.05105141  | 8.766486404 | -0.653839956 | 0.528877424 | 0.528877424 | -5.430253689 |
| 1441050_at   | 0.138994323  | 8.028499895 | 0.653806452  | 0.528898082 | 0.528898082 | -5.43027384  |
| 1430508_at   | -0.050588325 | 3.767910833 | -0.653752523 | 0.528931334 | 0.528931334 | -5.430306274 |
| 1456962_at   | 0.054425676  | 4.093886942 | 0.65369271   | 0.528968216 | 0.528968216 | -5.430342244 |
| 1448500_a_at | -0.070870224 | 7.410129489 | -0.653609947 | 0.529019251 | 0.529019251 | -5.43039201  |
| 1458201_at   | -0.055222374 | 7.224071249 | -0.653575256 | 0.529040644 | 0.529040644 | -5.430412869 |
| 1459060_at   | -0.066402061 | 3.913629035 | -0.653556761 | 0.52905205  | 0.52905205  | -5.430423989 |
| 1456099_at   | 0.079310827  | 6.628479521 | 0.653555178  | 0.529053026 | 0.529053026 | -5.430424941 |
| 1454905_at   | -0.05691106  | 8.138722657 | -0.653523603 | 0.529072498 | 0.529072498 | -5.430443924 |
| 1425474_a_at | -0.065971382 | 6.760402665 | -0.653354173 | 0.529176992 | 0.529176992 | -5.430545775 |
| 1421700_at   | 0.06975767   | 3.390999754 | 0.653333961  | 0.529189458 | 0.529189458 | -5.430557924 |
| 1433528_at   | 0.054972334  | 9.465743167 | 0.653288128  | 0.529217727 | 0.529217727 | -5.43058547  |
| 1442027_at   | 0.055608646  | 8.819333283 | 0.653256305  | 0.529237356 | 0.529237356 | -5.430604596 |
| 1446184_at   | 0.048710431  | 3.730297954 | 0.653203153  | 0.529270142 | 0.529270142 | -5.430636538 |
| 1440373_at   | 0.044877945  | 7.673653264 | 0.65316226   | 0.529295366 | 0.529295366 | -5.430661112 |
| 1427549_s_at | 0.050181296  | 3.165550454 | 0.653058835  | 0.529359167 | 0.529359167 | -5.430723257 |
| 1446684_at   | 0.074954897  | 5.66445971  | 0.653055234  | 0.529361388 | 0.529361388 | -5.43072542  |
| 1451512_s_at | -0.057434601 | 7.529074252 | -0.653013474 | 0.52938715  | 0.52938715  | -5.43075051  |
| 1419906_at   | -0.0823118   | 4.842943783 | -0.653003335 | 0.529393405 | 0.529393405 | -5.430756601 |
| 1422951_at   | 0.046241124  | 4.061478057 | 0.653002127  | 0.52939415  | 0.52939415  | -5.430757326 |
| 1443327_at   | -0.060462553 | 4.120780776 | -0.65295344  | 0.529424187 | 0.529424187 | -5.430786576 |
| 1428237_at   | 0.042996781  | 11.09256525 | 0.65292233   | 0.52944338  | 0.52944338  | -5.430805264 |
| 1448170_at   | 0.064734941  | 7.161019543 | 0.652890413  | 0.529463072 | 0.529463072 | -5.430824436 |
| 1456067_at   | 0.066316948  | 9.405426319 | 0.652819673  | 0.529506717 | 0.529506717 | -5.430866926 |
| 1418317_at   | 0.057158633  | 3.738167689 | 0.652782302  | 0.529529776 | 0.529529776 | -5.430889372 |
| 1433867_at   | 0.049489283  | 8.634748099 | 0.652775454  | 0.529534001 | 0.529534001 | -5.430893484 |
| 1444527_at   | 0.076158575  | 4.269992036 | 0.652707826  | 0.52957573  | 0.52957573  | -5.430934099 |
| 1436858_at   | 0.056144028  | 9.170573055 | 0.652676176  | 0.52959526  | 0.52959526  | -5.430953105 |
| 1436161_at   | 0.055031985  | 9.563990432 | 0.652660418  | 0.529604983 | 0.529604983 | -5.430962568 |
| 1447094_at   | 0.095515207  | 5.731416142 | 0.652643306  | 0.529615542 | 0.529615542 | -5.430972843 |
| 1455790_at   | 0.062122102  | 4.941031935 | 0.652637044  | 0.529619407 | 0.529619407 | -5.430976604 |
| 1459980_x_at | -0.050216847 | 9.04721275  | -0.652625788 | 0.529626353 | 0.529626353 | -5.430983363 |
| 1450639_at   | -0.04870766  | 3.245409249 | -0.652603159 | 0.529640317 | 0.529640317 | -5.43099695  |
| 1422629_s_at | 0.075081734  | 6.855616963 | 0.652544838  | 0.529676307 | 0.529676307 | -5.431031967 |
| 1432445_at   | 0.04643389   | 3.643034479 | 0.652544379  | 0.52967659  | 0.52967659  | -5.431032243 |
| 1436260_at   | 0.047593629  | 5.730136062 | 0.652531597  | 0.529684478 | 0.529684478 | -5.431039917 |
| 1460051_at   | -0.048882763 | 4.170300831 | -0.652530007 | 0.52968546  | 0.52968546  | -5.431040872 |
| 1418721_at   | 0.053625503  | 7.772463975 | 0.652475238  | 0.529719259 | 0.529719259 | -5.431073753 |
| 1427874_at   | 0.04339519   | 8.453815919 | 0.652464888  | 0.529725647 | 0.529725647 | -5.431079966 |
| 1420036_at   | 0.093127097  | 3.869723343 | 0.652446506  | 0.529736991 | 0.529736991 | -5.431091001 |
| 1421233_at   | 0.04081721   | 7.258619211 | 0.652413564  | 0.529757322 | 0.529757322 | -5.431110776 |
| 1445552_at   | 0.104249634  | 5.029247863 | 0.652411145  | 0.529758815 | 0.529758815 | -5.431112228 |
| 1459229_at   | -0.053433656 | 3.995320624 | -0.65235387  | 0.529794164 | 0.529794164 | -5.431146608 |
| 1458323_at   | 0.078461344  | 3.623330748 | 0.652343932  | 0.529800298 | 0.529800298 | -5.431152573 |
| 1435714_x_at | 0.059696316  | 5.764854549 | 0.652300412  | 0.529827159 | 0.529827159 | -5.431178694 |
| 1450457_at   | 0.095222105  | 6.460204937 | 0.652191265  | 0.52989453  | 0.52989453  | -5.431244199 |
| 1434072_at   | -0.056496162 | 7.495490265 | -0.652166309 | 0.529909934 | 0.529909934 | -5.431259175 |
| 1451996_at   | -0.048484402 | 5.445380729 | -0.652112318 | 0.529943262 | 0.529943262 | -5.431291572 |
| 1454091_at   | 0.060525574  | 3.794729278 | 0.652109862  | 0.529944778 | 0.529944778 | -5.431293046 |
| 1418872_at   | -0.068933946 | 3.802528629 | -0.652096931 | 0.529952761 | 0.529952761 | -5.431300805 |
| 1436816_at   | 0.052657576  | 8.729320061 | 0.652073445  | 0.529967259 | 0.529967259 | -5.431314897 |



|              |              |             |              |             |             |              |
|--------------|--------------|-------------|--------------|-------------|-------------|--------------|
| 1432678_at   | 0.073701682  | 3.875207889 | 0.651931173  | 0.53005509  | 0.53005509  | -5.431400252 |
| 1444837_at   | -0.069340341 | 3.972936759 | -0.651763675 | 0.530158506 | 0.530158506 | -5.43150072  |
| 1449201_at   | -0.103158586 | 4.486813095 | -0.651674122 | 0.530213803 | 0.530213803 | -5.431554426 |
| 1430715_at   | -0.066270551 | 4.774442224 | -0.651651388 | 0.530227841 | 0.530227841 | -5.431568059 |
| 1428853_at   | 0.052937107  | 11.44179046 | 0.651601272  | 0.530258788 | 0.530258788 | -5.43159811  |
| 1449928_at   | -0.078420594 | 7.95445946  | -0.651581473 | 0.530271014 | 0.530271014 | -5.431609982 |
| 1459096_at   | -0.049662664 | 3.972665791 | -0.65156259  | 0.530282675 | 0.530282675 | -5.431621303 |
| 1427706_a_at | -0.046468388 | 6.180954353 | -0.651561568 | 0.530283306 | 0.530283306 | -5.431621916 |
| 1442245_at   | -0.068017547 | 4.375450151 | -0.651484077 | 0.530331161 | 0.530331161 | -5.431668375 |
| 1433417_at   | 0.060488802  | 4.196018866 | 0.65148232   | 0.530332246 | 0.530332246 | -5.431669429 |
| 1423136_at   | 0.051519138  | 4.340804899 | 0.651458635  | 0.530346873 | 0.530346873 | -5.431683628 |
| 1460734_at   | -0.151772428 | 7.409744303 | -0.65143203  | 0.530363304 | 0.530363304 | -5.431699578 |
| 1444982_at   | 0.07646539   | 5.801853616 | 0.651392234  | 0.530387882 | 0.530387882 | -5.431723433 |
| 1438508_at   | 0.053425924  | 5.870557862 | 0.651384565  | 0.530392618 | 0.530392618 | -5.43172803  |
| 1429017_at   | -0.046114509 | 6.619406113 | -0.651264123 | 0.530467008 | 0.530467008 | -5.431800221 |
| 1427754_a_at | -0.099525473 | 6.551381491 | -0.651254372 | 0.530473031 | 0.530473031 | -5.431806065 |
| 1459991_at   | 0.053475467  | 6.642152547 | 0.651196409  | 0.530508833 | 0.530508833 | -5.431840802 |
| 1433353_at   | 0.043067717  | 4.005261588 | 0.651146563  | 0.530539624 | 0.530539624 | -5.431870673 |
| 1425329_a_at | 0.05844672   | 8.31547704  | 0.651135416  | 0.530546509 | 0.530546509 | -5.431877353 |
| 1425851_a_at | 0.060615454  | 5.446070238 | 0.651102945  | 0.530566567 | 0.530566567 | -5.43189681  |
| 1424171_a_at | 0.062713912  | 8.226119426 | 0.651092692  | 0.530572901 | 0.530572901 | -5.431902953 |
| 1456264_at   | 0.083398423  | 5.090357171 | 0.651077219  | 0.530582459 | 0.530582459 | -5.431912224 |
| 1446640_at   | 0.079340938  | 4.744923643 | 0.65107395   | 0.530584479 | 0.530584479 | -5.431914183 |
| 1438742_at   | -0.076437506 | 4.980209076 | -0.651038321 | 0.530606488 | 0.530606488 | -5.43193553  |
| 1439186_at   | 0.054098278  | 4.442595022 | 0.650966649  | 0.530650765 | 0.530650765 | -5.43197847  |
| 1459940_at   | -0.051834274 | 3.537032146 | -0.650923316 | 0.530677537 | 0.530677537 | -5.432004429 |
| 1439854_at   | -0.047531788 | 6.105533582 | -0.650847126 | 0.530724609 | 0.530724609 | -5.432050069 |
| 1452732_at   | -0.084513626 | 5.803044487 | -0.650715488 | 0.530805944 | 0.530805944 | -5.432128911 |
| 1456904_at   | 0.046874514  | 8.2918868   | 0.650705418  | 0.530812166 | 0.530812166 | -5.432134941 |
| 1437454_a_at | -0.043387817 | 8.813368135 | -0.650692715 | 0.530820015 | 0.530820015 | -5.432142549 |
| 1429599_a_at | 0.094452099  | 8.709718858 | 0.650677863  | 0.530829192 | 0.530829192 | -5.432151443 |
| 1453603_at   | -0.063547715 | 4.423265636 | -0.650656541 | 0.530842368 | 0.530842368 | -5.432164211 |
| 1419146_a_at | -0.058468392 | 4.248498696 | -0.650538385 | 0.530915381 | 0.530915381 | -5.43223496  |
| 1428728_at   | 0.044743418  | 7.693186939 | 0.65051509   | 0.530929777 | 0.530929777 | -5.432248907 |
| 1456101_at   | -0.048895391 | 3.213711143 | -0.650442607 | 0.530974572 | 0.530974572 | -5.432292302 |
| 1452204_at   | -0.054882038 | 7.588052654 | -0.650417247 | 0.530990245 | 0.530990245 | -5.432307483 |
| 1420152_at   | 0.061828549  | 3.666985277 | 0.650236768  | 0.531101792 | 0.531101792 | -5.43241551  |
| 1430365_at   | 0.049006613  | 4.822435233 | 0.650197252  | 0.531126217 | 0.531126217 | -5.432439158 |
| 1419725_at   | -0.070631359 | 4.163463244 | -0.65018708  | 0.531132504 | 0.531132504 | -5.432445245 |
| 1444894_at   | -0.055323897 | 5.055287787 | -0.650186626 | 0.531132785 | 0.531132785 | -5.432445517 |
| 1442852_at   | -0.059542448 | 4.376668256 | -0.650164522 | 0.531146448 | 0.531146448 | -5.432458745 |
| 1423687_a_at | 0.057668566  | 10.09952157 | 0.65015716   | 0.531150999 | 0.531150999 | -5.43246315  |
| 1435261_at   | 0.067071576  | 7.842560179 | 0.650100769  | 0.531185857 | 0.531185857 | -5.432496894 |
| 1420051_at   | -0.047470887 | 3.482433188 | -0.650099615 | 0.53118657  | 0.53118657  | -5.432497584 |
| 1451311_a_at | 0.051946894  | 8.932095815 | 0.650067593  | 0.531206365 | 0.531206365 | -5.432516745 |
| 1424007_at   | -0.077871482 | 9.512204852 | -0.650041647 | 0.531222404 | 0.531222404 | -5.432532269 |
| 1431741_a_at | 0.059188978  | 4.628015679 | 0.64997177   | 0.531265602 | 0.531265602 | -5.432574075 |
| 1427999_at   | 0.042964294  | 3.957950643 | 0.649948829  | 0.531279785 | 0.531279785 | -5.4325878   |
| 1459230_at   | 0.052188248  | 3.93776318  | 0.649933001  | 0.53128957  | 0.53128957  | -5.432597269 |
| 1450989_at   | 0.054569581  | 3.484921633 | 0.649930154  | 0.53129133  | 0.53129133  | -5.432598972 |
| 1446425_at   | 0.059168625  | 6.645099326 | 0.649917978  | 0.531298858 | 0.531298858 | -5.432606256 |
| 1429025_a_at | 0.059690328  | 4.693554408 | 0.649895333  | 0.531312858 | 0.531312858 | -5.432619802 |
| 1436416_x_at | -0.053242225 | 8.861153388 | -0.649862142 | 0.531333378 | 0.531333378 | -5.432639657 |

|              |              |             |              |             |             |              |
|--------------|--------------|-------------|--------------|-------------|-------------|--------------|
| 1430081_at   | -0.077325053 | 5.449956247 | -0.649850131 | 0.531340804 | 0.531340804 | -5.432646841 |
| 1443779_s_at | 0.07172877   | 7.997214546 | 0.649803978  | 0.531369339 | 0.531369339 | -5.432674447 |
| 1426066_a_at | -0.058690528 | 4.493363136 | -0.649798439 | 0.531372764 | 0.531372764 | -5.43267776  |
| 1438527_at   | 0.04322666   | 7.986354805 | 0.649787907  | 0.531379276 | 0.531379276 | -5.432684059 |
| 1442883_s_at | 0.061867432  | 9.086963526 | 0.649764544  | 0.531393721 | 0.531393721 | -5.432698033 |
| 1446887_at   | -0.096247824 | 4.964358408 | -0.649690059 | 0.531439777 | 0.531439777 | -5.432742579 |
| 1425689_at   | -0.048260512 | 3.997588729 | -0.649659659 | 0.531458574 | 0.531458574 | -5.432760758 |
| 1445995_at   | -0.069713663 | 5.220977106 | -0.649631442 | 0.531476022 | 0.531476022 | -5.432777632 |
| 1424810_at   | -0.066292006 | 6.258132306 | -0.649575652 | 0.531510521 | 0.531510521 | -5.432810991 |
| 1440798_x_at | 0.065601407  | 3.524933779 | 0.6495017    | 0.531556253 | 0.531556253 | -5.432855207 |
| 1453633_a_at | -0.085758686 | 5.271623551 | -0.649443192 | 0.531592435 | 0.531592435 | -5.432890185 |
| 1430185_at   | 0.072235114  | 5.89324148  | 0.649438539  | 0.531595313 | 0.531595313 | -5.432892967 |
| 1417268_at   | 0.104968282  | 6.206004903 | 0.649434011  | 0.531598113 | 0.531598113 | -5.432895674 |
| 1447163_x_at | 0.065968603  | 3.689013233 | 0.649420394  | 0.531606535 | 0.531606535 | -5.432903815 |
| 1451601_a_at | -0.067841248 | 7.221303823 | -0.649415743 | 0.531609411 | 0.531609411 | -5.432906595 |
| 1455255_at   | 0.069286606  | 7.649628738 | 0.649376496  | 0.531633684 | 0.531633684 | -5.432930056 |
| 1453255_at   | -0.048970547 | 7.586245631 | -0.649343739 | 0.531653943 | 0.531653943 | -5.432949636 |
| 1424158_at   | 0.093004881  | 4.934761741 | 0.649218987  | 0.531731103 | 0.531731103 | -5.433024199 |
| 1435318_at   | -0.058052982 | 3.673022207 | -0.649214286 | 0.531734011 | 0.531734011 | -5.433027008 |
| 1455260_at   | 0.059241062  | 6.761173533 | 0.649148667  | 0.5317746   | 0.5317746   | -5.433066222 |
| 1418277_at   | 0.045705618  | 10.18932204 | 0.649144697  | 0.531777055 | 0.531777055 | -5.433068595 |
| 1436580_at   | -0.047527214 | 7.043031861 | -0.649123056 | 0.531790441 | 0.531790441 | -5.433081526 |
| 1441430_at   | 0.055788643  | 3.289057158 | 0.649116197  | 0.531794684 | 0.531794684 | -5.433085625 |
| 1446774_at   | 0.062953496  | 5.66617869  | 0.649090642  | 0.531810492 | 0.531810492 | -5.433100895 |
| 1423664_at   | -0.047985456 | 9.493031258 | -0.649069213 | 0.531823748 | 0.531823748 | -5.433113699 |
| 1438950_x_at | -0.066003592 | 6.857711138 | -0.649055839 | 0.531832022 | 0.531832022 | -5.433121691 |
| 1440008_at   | -0.06011466  | 4.076781837 | -0.649054072 | 0.531833115 | 0.531833115 | -5.433122746 |
| 1428902_at   | -0.05812988  | 7.966086025 | -0.649003706 | 0.531864271 | 0.531864271 | -5.433152838 |
| 1460612_at   | 0.057578774  | 3.904601313 | 0.648905296  | 0.531925152 | 0.531925152 | -5.43321163  |
| 1442209_at   | 0.051714301  | 5.27326978  | 0.648880368  | 0.531940574 | 0.531940574 | -5.433226521 |
| 1456579_x_at | 0.045571052  | 6.460976224 | 0.648800766  | 0.531989824 | 0.531989824 | -5.433274068 |
| 1416009_at   | -0.040531144 | 11.10426208 | -0.648796446 | 0.531992497 | 0.531992497 | -5.433276649 |
| 1456247_x_at | -0.044711763 | 3.281346094 | -0.648776465 | 0.532004859 | 0.532004859 | -5.433288583 |
| 1416994_at   | 0.067008956  | 7.777024645 | 0.648771871  | 0.532007702 | 0.532007702 | -5.433291327 |
| 1437766_at   | -0.041378817 | 6.284687385 | -0.648766065 | 0.532011294 | 0.532011294 | -5.433294794 |
| 1442885_at   | -0.080570826 | 5.369636162 | -0.648748677 | 0.532022052 | 0.532022052 | -5.433305179 |
| 1433151_at   | -0.048245464 | 5.940489088 | -0.648723967 | 0.532037342 | 0.532037342 | -5.433319937 |
| 1426196_at   | -0.052678431 | 3.731017828 | -0.64870478  | 0.532049213 | 0.532049213 | -5.433331396 |
| 1423421_at   | 0.08335414   | 8.157677077 | 0.648667068  | 0.532072548 | 0.532072548 | -5.433353917 |
| 1440260_at   | 0.057396048  | 7.210275869 | 0.648645503  | 0.532085892 | 0.532085892 | -5.433366795 |
| 1451115_at   | -0.062426273 | 8.222173752 | -0.648621337 | 0.532100846 | 0.532100846 | -5.433381226 |
| 1415720_s_at | 0.0428714    | 7.963984447 | 0.6485134    | 0.532167638 | 0.532167638 | -5.433445674 |
| 1452456_at   | -0.05857806  | 6.397856523 | -0.648484791 | 0.532185343 | 0.532185343 | -5.433462754 |
| 1442248_at   | -0.057580931 | 8.356179365 | -0.648327843 | 0.532282474 | 0.532282474 | -5.433556445 |
| 1453440_at   | 0.047768917  | 3.415140541 | 0.648307491  | 0.53229507  | 0.53229507  | -5.433568593 |
| 1444054_at   | -0.054611016 | 5.318415708 | -0.648279665 | 0.532312293 | 0.532312293 | -5.433585201 |
| 1424884_at   | 0.039226135  | 6.718983839 | 0.64822733   | 0.532344685 | 0.532344685 | -5.433616436 |
| 1450022_at   | 0.069496172  | 6.910762165 | 0.648226218  | 0.532345373 | 0.532345373 | -5.4336171   |
| 1421678_at   | -0.067315927 | 4.5516964   | -0.648217192 | 0.53235096  | 0.53235096  | -5.433622487 |
| 1425068_a_at | -0.052810159 | 8.341662832 | -0.648165114 | 0.532383195 | 0.532383195 | -5.433653566 |
| 1436226_at   | 0.063568394  | 8.248994648 | 0.648155265  | 0.532389291 | 0.532389291 | -5.433659443 |
| 1444189_at   | -0.040818605 | 4.083749226 | -0.648152391 | 0.53239107  | 0.53239107  | -5.433661158 |
| 1460348_at   | 0.060944238  | 7.460987818 | 0.648149137  | 0.532393084 | 0.532393084 | -5.4336631   |

|              |              |             |              |             |             |              |
|--------------|--------------|-------------|--------------|-------------|-------------|--------------|
| 1428205_x_at | 0.101813209  | 5.779013617 | 0.648141244  | 0.53239797  | 0.53239797  | -5.43366781  |
| 1419750_at   | 0.050447065  | 4.410947314 | 0.648140563  | 0.532398391 | 0.532398391 | -5.433668216 |
| 1430217_at   | -0.052359634 | 4.029023314 | -0.648139239 | 0.532399211 | 0.532399211 | -5.433669007 |
| 1422603_at   | -0.053825718 | 10.02893138 | -0.648097228 | 0.532425216 | 0.532425216 | -5.433694075 |
| 1460485_at   | 0.054489684  | 3.614903141 | 0.648075215  | 0.532438842 | 0.532438842 | -5.43370721  |
| 1419079_at   | -0.062561431 | 4.597916893 | -0.648048809 | 0.532455188 | 0.532455188 | -5.433722966 |
| 1430668_a_at | 0.047645138  | 7.459320491 | 0.648022136  | 0.5324717   | 0.5324717   | -5.433738881 |
| 1459304_at   | 0.076350221  | 6.903621651 | 0.647986551  | 0.532493729 | 0.532493729 | -5.433760111 |
| 1442620_at   | -0.061831179 | 6.488451486 | -0.647926307 | 0.532531024 | 0.532531024 | -5.433796052 |
| 1418086_at   | 0.043391161  | 4.801412874 | 0.647921977  | 0.532533705 | 0.532533705 | -5.433798635 |
| 1420736_at   | -0.051279349 | 4.827936505 | -0.647909309 | 0.532541547 | 0.532541547 | -5.433806192 |
| 1449493_at   | -0.047956723 | 4.100416626 | -0.647874153 | 0.532563312 | 0.532563312 | -5.433827163 |
| 1440748_at   | -0.056871933 | 3.88175254  | -0.647830108 | 0.532590581 | 0.532590581 | -5.433853436 |
| 1416244_a_at | 0.038905121  | 12.20976928 | 0.647800822  | 0.532608713 | 0.532608713 | -5.433870904 |
| 1436885_a_at | 0.08986388   | 7.240654588 | 0.64779611   | 0.532611631 | 0.532611631 | -5.433873715 |
| 1428096_at   | 0.045984236  | 8.836635162 | 0.647778048  | 0.532622813 | 0.532622813 | -5.433884487 |
| 1459827_x_at | 0.059642333  | 7.632764141 | 0.647776747  | 0.532623619 | 0.532623619 | -5.433885264 |
| 1418448_at   | 0.056710696  | 8.000027861 | 0.647707828  | 0.532666291 | 0.532666291 | -5.433926367 |
| 1431242_at   | -0.046023826 | 5.664470395 | -0.647658278 | 0.532696971 | 0.532696971 | -5.433955917 |
| 1415841_at   | 0.056352302  | 10.26956203 | 0.647546728  | 0.532766045 | 0.532766045 | -5.434022432 |
| 1445250_at   | 0.058330266  | 3.753135815 | 0.647487081  | 0.532802982 | 0.532802982 | -5.434057995 |
| 1423538_at   | 0.0418905    | 9.52792217  | 0.647461158  | 0.532819036 | 0.532819036 | -5.43407345  |
| 1422685_at   | 0.057908233  | 8.265789642 | 0.647445724  | 0.532828594 | 0.532828594 | -5.434082651 |
| 1421744_at   | -0.050118432 | 4.901994841 | -0.647432852 | 0.532836565 | 0.532836565 | -5.434090324 |
| 1448533_at   | 0.042777878  | 10.51131757 | 0.647407867  | 0.532852038 | 0.532852038 | -5.434105219 |
| 1417649_at   | -0.051151386 | 12.74716967 | -0.64735544  | 0.532884507 | 0.532884507 | -5.434136471 |
| 1431633_x_at | -0.045859915 | 3.124022735 | -0.647235111 | 0.532959033 | 0.532959033 | -5.434208191 |
| 1456699_s_at | 0.054742126  | 9.898944894 | 0.647218277  | 0.53296946  | 0.53296946  | -5.434218224 |
| 1427458_at   | -0.058459789 | 4.602218465 | -0.647135247 | 0.533020888 | 0.533020888 | -5.434267704 |
| 1418022_at   | -0.046953024 | 9.348496582 | -0.647132017 | 0.533022889 | 0.533022889 | -5.434269629 |
| 1449784_at   | 0.056638882  | 3.158708574 | 0.647124806  | 0.533027356 | 0.533027356 | -5.434273926 |
| 1429234_s_at | 0.058179816  | 10.74080177 | 0.647124303  | 0.533027667 | 0.533027667 | -5.434274225 |
| 1456720_at   | -0.126529969 | 5.674888243 | -0.647122184 | 0.53302898  | 0.53302898  | -5.434275489 |
| 1458565_at   | -0.068185765 | 4.253501651 | -0.647116806 | 0.533032311 | 0.533032311 | -5.434278693 |
| 1423142_a_at | 0.164751374  | 7.434607407 | 0.647115878  | 0.533032886 | 0.533032886 | -5.434279246 |
| 1437462_x_at | 0.076353403  | 4.934572911 | 0.646987982  | 0.533112112 | 0.533112112 | -5.43435545  |
| 1440201_at   | 0.087660809  | 6.602419469 | 0.6468473    | 0.533199266 | 0.533199266 | -5.434439257 |
| 1418551_at   | 0.064645329  | 5.537758691 | 0.646693502  | 0.533294555 | 0.533294555 | -5.434530859 |
| 1426128_a_at | -0.083681368 | 4.393515937 | -0.646667571 | 0.533310622 | 0.533310622 | -5.434546301 |
| 1418167_at   | 0.074483172  | 5.893641504 | 0.64666509   | 0.533312159 | 0.533312159 | -5.434547779 |
| 1447248_at   | 0.054779807  | 3.457313296 | 0.646653665  | 0.533319238 | 0.533319238 | -5.434554582 |
| 1430082_at   | -0.065364267 | 4.583178743 | -0.646610585 | 0.533345932 | 0.533345932 | -5.434580235 |
| 1440844_at   | -0.050934768 | 5.23000361  | -0.646579114 | 0.533365434 | 0.533365434 | -5.434598975 |
| 1457905_at   | 0.051973758  | 5.950131299 | 0.646549396  | 0.533383849 | 0.533383849 | -5.43461667  |
| 1438682_at   | -0.04636577  | 9.382852128 | -0.646476121 | 0.533429256 | 0.533429256 | -5.434660297 |
| 1423292_a_at | 0.074450634  | 6.632840703 | 0.646445439  | 0.533448269 | 0.533448269 | -5.434678562 |
| 1425495_at   | 0.15572655   | 6.170028032 | 0.646313621  | 0.533529962 | 0.533529962 | -5.43475703  |
| 1454917_at   | 0.040820797  | 9.759618257 | 0.646300213  | 0.533538272 | 0.533538272 | -5.43476501  |
| 1436872_at   | -0.048721318 | 7.495410883 | -0.646291938 | 0.533543401 | 0.533543401 | -5.434769936 |
| 1424478_at   | -0.053686656 | 7.551545477 | -0.64628916  | 0.533545123 | 0.533545123 | -5.434771589 |
| 1423504_at   | -0.075500312 | 4.785418032 | -0.646141927 | 0.533636379 | 0.533636379 | -5.434859212 |
| 1442152_at   | 0.057624652  | 4.935234519 | 0.646093379  | 0.533666472 | 0.533666472 | -5.434888101 |
| 1420820_at   | 0.042488407  | 12.08283503 | 0.64597667   | 0.533738818 | 0.533738818 | -5.434957541 |

|              |              |             |              |             |             |              |
|--------------|--------------|-------------|--------------|-------------|-------------|--------------|
| 1425019_at   | 0.075452395  | 7.598022311 | 0.645954967  | 0.533752271 | 0.533752271 | -5.434970453 |
| 1430914_at   | -0.056664797 | 5.508472748 | -0.645927048 | 0.533769579 | 0.533769579 | -5.434987062 |
| 1460002_at   | 0.051213623  | 7.909911251 | 0.645905767  | 0.533782772 | 0.533782772 | -5.434999722 |
| 1435626_a_at | -0.058324402 | 8.646665574 | -0.64587571  | 0.533801406 | 0.533801406 | -5.435017601 |
| 1448589_at   | -0.048668919 | 10.76290915 | -0.645795756 | 0.533850975 | 0.533850975 | -5.435065159 |
| 1435082_at   | 0.096179483  | 7.562485619 | 0.645762476  | 0.533871609 | 0.533871609 | -5.435084954 |
| 1456576_x_at | 0.074854917  | 9.056859814 | 0.645740238  | 0.533885396 | 0.533885396 | -5.43509818  |
| 1423337_at   | 0.058643682  | 7.303499765 | 0.645709921  | 0.533904193 | 0.533904193 | -5.43511621  |
| 1447705_at   | -0.070975371 | 6.226899991 | -0.645705268 | 0.533907079 | 0.533907079 | -5.435118977 |
| 1444574_at   | 0.068716458  | 4.323027709 | 0.645704704  | 0.533907428 | 0.533907428 | -5.435119313 |
| 1442605_at   | 0.051437296  | 6.169144971 | 0.645611343  | 0.533965316 | 0.533965316 | -5.435174831 |
| 1427285_s_at | 0.125211058  | 7.646520664 | 0.645601109  | 0.533971662 | 0.533971662 | -5.435180917 |
| 1444253_at   | 0.092135527  | 6.331311701 | 0.645587272  | 0.533980242 | 0.533980242 | -5.435189145 |
| 1427183_at   | 0.136307193  | 8.795810651 | 0.645581321  | 0.533983932 | 0.533983932 | -5.435192683 |
| 1457036_at   | 0.060129451  | 7.322052657 | 0.645569354  | 0.533991352 | 0.533991352 | -5.435199799 |
| 1422523_at   | 0.062442936  | 5.50652679  | 0.645546309  | 0.534005642 | 0.534005642 | -5.435213501 |
| 1421420_at   | -0.069136957 | 6.030666081 | -0.64553852  | 0.534010472 | 0.534010472 | -5.435218132 |
| 1446479_at   | -0.079944594 | 4.086285403 | -0.645483675 | 0.534044482 | 0.534044482 | -5.43525074  |
| 1436743_at   | -0.059964007 | 3.693913584 | -0.645421947 | 0.534082761 | 0.534082761 | -5.435287437 |
| 1428097_at   | 0.0552233    | 9.339466637 | 0.64541031   | 0.534089978 | 0.534089978 | -5.435294355 |
| 1435297_at   | 0.043723226  | 3.939204218 | 0.645384153  | 0.5341062   | 0.5341062   | -5.435309904 |
| 1443043_at   | -0.074663969 | 4.08642825  | -0.645338627 | 0.534134434 | 0.534134434 | -5.435336966 |
| 1437269_at   | 0.05250889   | 5.978112198 | 0.645332172  | 0.534138437 | 0.534138437 | -5.435340803 |
| 1456885_at   | 0.070733479  | 5.700008068 | 0.645293867  | 0.534162193 | 0.534162193 | -5.43536357  |
| 1426118_a_at | -0.050648145 | 8.736859976 | -0.645221695 | 0.534206956 | 0.534206956 | -5.435406465 |
| 1430596_s_at | -0.06120997  | 7.725795283 | -0.64509523  | 0.534285397 | 0.534285397 | -5.435481618 |
| 1428454_at   | -0.064083945 | 6.205017968 | -0.644973253 | 0.53436106  | 0.53436106  | -5.43555409  |
| 1421764_at   | 0.055515526  | 3.746901076 | 0.644946747  | 0.534377502 | 0.534377502 | -5.435569837 |
| 1442716_at   | 0.049351273  | 3.459086596 | 0.64494524   | 0.534378438 | 0.534378438 | -5.435570733 |
| 1421499_a_at | 0.066293039  | 5.642754807 | 0.644936823  | 0.534383659 | 0.534383659 | -5.435575733 |
| 1454947_a_at | 0.072500903  | 8.946793079 | 0.644923812  | 0.534391731 | 0.534391731 | -5.435583462 |
| 1442972_at   | -0.061794611 | 6.342015627 | -0.644886502 | 0.534414876 | 0.534414876 | -5.435605626 |
| 1449207_a_at | 0.051527934  | 8.906742489 | 0.644886363  | 0.534414962 | 0.534414962 | -5.435605708 |
| 1445344_at   | -0.052940177 | 5.762575395 | -0.644867683 | 0.534426551 | 0.534426551 | -5.435616805 |
| 1444309_at   | -0.085767899 | 5.712305146 | -0.644795779 | 0.53447116  | 0.53447116  | -5.435659515 |
| 1426083_a_at | 0.049882352  | 11.52976529 | 0.644787252  | 0.53447645  | 0.53447645  | -5.435664579 |
| 1460092_at   | -0.093754497 | 6.755781656 | -0.644712069 | 0.534523096 | 0.534523096 | -5.435709231 |
| 1426160_a_at | 0.044332431  | 8.004893318 | 0.6446859    | 0.534539333 | 0.534539333 | -5.435724772 |
| 1424273_at   | -0.071765723 | 4.607863924 | -0.64467277  | 0.534547479 | 0.534547479 | -5.435732569 |
| 1454496_at   | 0.045624329  | 3.315955154 | 0.644665304  | 0.534552111 | 0.534552111 | -5.435737003 |
| 1441968_at   | -0.06297746  | 6.642121331 | -0.644642909 | 0.534566007 | 0.534566007 | -5.435750302 |
| 1426469_a_at | 0.05508837   | 8.332476814 | 0.644614096  | 0.534583885 | 0.534583885 | -5.435767412 |
| 1460408_at   | 0.056118555  | 3.236848201 | 0.644548326  | 0.534624696 | 0.534624696 | -5.435806464 |
| 1444547_at   | 0.08588008   | 3.946478397 | 0.644546084  | 0.534626086 | 0.534626086 | -5.435807795 |
| 1456400_at   | -0.066387371 | 3.597915558 | -0.644517094 | 0.534644076 | 0.534644076 | -5.435825008 |
| 1440858_at   | -0.054267642 | 7.042569536 | -0.644458074 | 0.5346807   | 0.5346807   | -5.435860047 |
| 1459233_at   | 0.078766528  | 5.385204846 | 0.644338245  | 0.534755064 | 0.534755064 | -5.435931181 |
| 1422653_at   | 0.070912362  | 7.084229485 | 0.644307402  | 0.534774205 | 0.534774205 | -5.435949488 |
| 1429092_at   | -0.047801411 | 8.104388158 | -0.644278024 | 0.534792438 | 0.534792438 | -5.435966924 |
| 1435378_at   | -0.055076229 | 5.86802975  | -0.644270296 | 0.534797234 | 0.534797234 | -5.435971511 |
| 1424449_at   | -0.054236093 | 6.416996708 | -0.644228993 | 0.534822869 | 0.534822869 | -5.435996024 |
| 1427337_at   | 0.084298709  | 4.082599708 | 0.644192315  | 0.534845633 | 0.534845633 | -5.436017791 |
| 1418110_a_at | -0.090222962 | 6.474837756 | -0.6441867   | 0.534849118 | 0.534849118 | -5.436021123 |

|              |              |             |              |             |             |              |
|--------------|--------------|-------------|--------------|-------------|-------------|--------------|
| 1415676_a_at | -0.040812446 | 10.88982195 | -0.644169977 | 0.534859497 | 0.534859497 | -5.436031047 |
| 1439838_a_at | -0.06490376  | 4.282918754 | -0.644166892 | 0.534861413 | 0.534861413 | -5.436032878 |
| 1426306_a_at | -0.041770989 | 10.61155314 | -0.644153369 | 0.534869805 | 0.534869805 | -5.436040903 |
| 1439527_at   | 0.077593517  | 4.020719367 | 0.64414324   | 0.534876093 | 0.534876093 | -5.436046914 |
| 1433200_at   | -0.045587789 | 3.594226152 | -0.644120808 | 0.534890016 | 0.534890016 | -5.436060225 |
| 1447481_at   | -0.062925135 | 6.451914212 | -0.644087375 | 0.534910768 | 0.534910768 | -5.436080063 |
| 1435272_at   | -0.063665013 | 8.310686009 | -0.644044216 | 0.534937558 | 0.534937558 | -5.436105671 |
| 1453843_at   | 0.055427922  | 4.37645047  | 0.643959502  | 0.534990144 | 0.534990144 | -5.436155931 |
| 1417660_s_at | 0.051917851  | 10.85495032 | 0.643939782  | 0.535002386 | 0.535002386 | -5.43616763  |
| 1423626_at   | 0.065440477  | 8.579915028 | 0.643876256  | 0.535041821 | 0.535041821 | -5.436205314 |
| 1425142_a_at | -0.069430245 | 11.35719657 | -0.643864054 | 0.535049396 | 0.535049396 | -5.436212552 |
| 1431729_at   | -0.071343232 | 5.835267089 | -0.643838031 | 0.535065552 | 0.535065552 | -5.436227988 |
| 1432434_at   | 0.046842049  | 3.690277708 | 0.643808549  | 0.535083855 | 0.535083855 | -5.436245476 |
| 1431507_a_at | 0.061353401  | 8.860897933 | 0.643800479  | 0.535088865 | 0.535088865 | -5.436250262 |
| 1419425_at   | 0.075176235  | 5.972916928 | 0.643759819  | 0.535114108 | 0.535114108 | -5.436274378 |
| 1454707_at   | 0.04756113   | 8.300100184 | 0.643731302  | 0.535131814 | 0.535131814 | -5.436291291 |
| 1459881_at   | 0.070904052  | 5.718313305 | 0.643638834  | 0.535189225 | 0.535189225 | -5.436346126 |
| 1441964_at   | -0.069532426 | 5.547403497 | -0.643590355 | 0.535219326 | 0.535219326 | -5.436374873 |
| 1458443_at   | 0.094576742  | 5.552555482 | 0.643573079  | 0.535230054 | 0.535230054 | -5.436385117 |
| 1450248_at   | 0.04885117   | 4.177589027 | 0.64354529   | 0.535247309 | 0.535247309 | -5.436401593 |
| 1421962_at   | -0.044962433 | 6.505281048 | -0.643524951 | 0.535259938 | 0.535259938 | -5.436413652 |
| 1423592_at   | 0.045173507  | 7.841106122 | 0.643500077  | 0.535275384 | 0.535275384 | -5.4364284   |
| 1442432_x_at | -0.057950606 | 5.123072716 | -0.643473204 | 0.535292071 | 0.535292071 | -5.436444331 |
| 1458825_at   | 0.045695202  | 4.226686987 | 0.643468593  | 0.535294934 | 0.535294934 | -5.436447065 |
| 1418107_at   | -0.047271154 | 6.845276456 | -0.643435481 | 0.535315496 | 0.535315496 | -5.436466695 |
| 1430541_at   | -0.096429309 | 4.136734487 | -0.643423653 | 0.535322841 | 0.535322841 | -5.436473707 |
| 1437442_at   | -0.070124935 | 7.648476405 | -0.64338526  | 0.535346683 | 0.535346683 | -5.436496466 |
| 1428969_at   | 0.053424658  | 9.665435716 | 0.643355752  | 0.535365008 | 0.535365008 | -5.436513957 |
| 1436405_at   | -0.068910934 | 6.089211023 | -0.643311314 | 0.535392605 | 0.535392605 | -5.436540297 |
| 1420744_at   | -0.081394794 | 4.699165395 | -0.643302426 | 0.535398125 | 0.535398125 | -5.436545565 |
| 1430272_at   | -0.052089164 | 7.061643083 | -0.643297219 | 0.535401359 | 0.535401359 | -5.436548651 |
| 1427794_at   | 0.045405677  | 3.570014719 | 0.643278717  | 0.53541285  | 0.53541285  | -5.436559617 |
| 1443124_at   | 0.051860031  | 4.17336448  | 0.643167641  | 0.535481836 | 0.535481836 | -5.436625445 |
| 1452675_at   | 0.044496827  | 8.573216418 | 0.643126898  | 0.535507142 | 0.535507142 | -5.436649589 |
| 1419827_s_at | -0.046760822 | 4.857513438 | -0.643065218 | 0.535545453 | 0.535545453 | -5.436686136 |
| 1427969_s_at | 0.063909567  | 7.639849882 | 0.643063823  | 0.53554632  | 0.53554632  | -5.436686963 |
| 1424685_at   | 0.056239002  | 8.188118266 | 0.643043972  | 0.53555865  | 0.53555865  | -5.436698725 |
| 1435027_at   | 0.049734149  | 8.273891169 | 0.642995108  | 0.535589003 | 0.535589003 | -5.436727675 |
| 1458263_at   | 0.096490121  | 5.679684081 | 0.642953526  | 0.535614833 | 0.535614833 | -5.43675231  |
| 1431196_at   | 0.089507292  | 6.13270552  | 0.642935045  | 0.535626313 | 0.535626313 | -5.436763258 |
| 1430661_at   | 0.050619114  | 5.490117522 | 0.642902364  | 0.535646615 | 0.535646615 | -5.436782618 |
| 1436755_at   | -0.07773194  | 4.129181574 | -0.642898848 | 0.5356488   | 0.5356488   | -5.436784701 |
| 1450512_at   | -0.075008157 | 4.541183376 | -0.64288457  | 0.535657669 | 0.535657669 | -5.436793158 |
| 1433299_at   | 0.06944102   | 4.413510414 | 0.642785078  | 0.535719477 | 0.535719477 | -5.436852089 |
| 1426402_at   | 0.044260373  | 10.50624328 | 0.642775904  | 0.535725177 | 0.535725177 | -5.436857523 |
| 1432767_at   | 0.052557674  | 4.045131277 | 0.642710959  | 0.535765526 | 0.535765526 | -5.436895986 |
| 1460629_at   | 0.18844182   | 5.798181513 | 0.642651313  | 0.535802584 | 0.535802584 | -5.436931308 |
| 1424757_at   | -0.088235131 | 7.443440598 | -0.642641469 | 0.535808701 | 0.535808701 | -5.436937137 |
| 1453968_at   | 0.053245916  | 5.205219586 | 0.642624476  | 0.535819259 | 0.535819259 | -5.4369472   |
| 1432070_at   | -0.087011787 | 4.009090251 | -0.642613897 | 0.535825832 | 0.535825832 | -5.436953464 |
| 1447747_x_at | -0.066447688 | 4.943376525 | -0.642571328 | 0.535852282 | 0.535852282 | -5.43697867  |
| 1437837_x_at | -0.055748367 | 10.82063066 | -0.642502946 | 0.535894772 | 0.535894772 | -5.437019156 |
| 1450688_at   | 0.058645462  | 9.236713728 | 0.642405766  | 0.53595516  | 0.53595516  | -5.437076687 |

|              |              |             |              |             |             |              |
|--------------|--------------|-------------|--------------|-------------|-------------|--------------|
| 1441075_at   | -0.08801347  | 4.418653928 | -0.642405148 | 0.535955544 | 0.535955544 | -5.437077053 |
| 1446323_at   | 0.075375014  | 5.263550345 | 0.642389391  | 0.535965336 | 0.535965336 | -5.437086381 |
| 1455543_at   | -0.059584507 | 6.609482403 | -0.642383534 | 0.535968976 | 0.535968976 | -5.437089847 |
| 1435675_at   | 0.050786956  | 8.369543689 | 0.642354584  | 0.535986967 | 0.535986967 | -5.437106984 |
| 1431612_at   | 0.062366786  | 3.860998041 | 0.642291894  | 0.536025926 | 0.536025926 | -5.437144089 |
| 1425365_a_at | 0.059089325  | 3.503472581 | 0.642284759  | 0.53603036  | 0.53603036  | -5.437148312 |
| 1419171_at   | 0.054499247  | 4.035154861 | 0.642240867  | 0.536057638 | 0.536057638 | -5.437174289 |
| 1439508_at   | 0.052952836  | 4.943363232 | 0.642185094  | 0.536092301 | 0.536092301 | -5.437207296 |
| 1448606_at   | -0.065886774 | 10.78250578 | -0.642185038 | 0.536092337 | 0.536092337 | -5.437207329 |
| 1430278_a_at | -0.050422037 | 4.445415713 | -0.642182816 | 0.536093717 | 0.536093717 | -5.437208644 |
| 1428714_at   | -0.090640769 | 9.148106266 | -0.642179528 | 0.536095761 | 0.536095761 | -5.43721059  |
| 1425922_a_at | 0.059069187  | 5.859299245 | 0.642174731  | 0.536098742 | 0.536098742 | -5.437213428 |
| 1429545_at   | 0.060444656  | 7.498019689 | 0.642160389  | 0.536107656 | 0.536107656 | -5.437221915 |
| 1422334_a_at | 0.054638098  | 4.237901221 | 0.642056433  | 0.53617227  | 0.53617227  | -5.437283427 |
| 1439474_x_at | -0.04202082  | 3.455200357 | -0.642053185 | 0.536174289 | 0.536174289 | -5.437285349 |
| 1458677_at   | 0.06116548   | 4.102034719 | 0.642006081  | 0.536203568 | 0.536203568 | -5.437313218 |
| 1449186_at   | 0.039226751  | 8.027022311 | 0.641983651  | 0.53621751  | 0.53621751  | -5.437326488 |
| 1452784_at   | -0.044602995 | 10.39288122 | -0.641976926 | 0.53622169  | 0.53622169  | -5.437330467 |
| 1435883_at   | 0.061177184  | 6.514352741 | 0.641874584  | 0.536285309 | 0.536285309 | -5.437391008 |
| 1438478_a_at | -0.03971829  | 9.066718974 | -0.641874088 | 0.536285617 | 0.536285617 | -5.437391302 |
| 1429548_at   | -0.052785217 | 4.018368079 | -0.641848909 | 0.53630127  | 0.53630127  | -5.437406195 |
| 1422186_s_at | 0.04165317   | 10.23677544 | 0.641809138  | 0.536325994 | 0.536325994 | -5.437429719 |
| 1417298_at   | -0.063855508 | 9.499473869 | -0.641784772 | 0.536341142 | 0.536341142 | -5.43744413  |
| 1427662_at   | 0.065721702  | 4.213234271 | 0.641780581  | 0.536343748 | 0.536343748 | -5.437446609 |
| 1449285_at   | -0.058894397 | 3.70477274  | -0.641780541 | 0.536343772 | 0.536343772 | -5.437446632 |
| 1419351_a_at | 0.046573404  | 8.496677676 | 0.641757183  | 0.536358294 | 0.536358294 | -5.437460447 |
| 1433432_x_at | 0.056996416  | 13.37487951 | 0.641722323  | 0.536379967 | 0.536379967 | -5.437481063 |
| 1424802_a_at | 0.040287774  | 11.56597777 | 0.641676705  | 0.536408329 | 0.536408329 | -5.437508041 |
| 1449427_at   | -0.047724791 | 4.279625193 | -0.641668614 | 0.536413358 | 0.536413358 | -5.437512825 |
| 1427983_at   | 0.043974856  | 8.985415114 | 0.641647616  | 0.536426414 | 0.536426414 | -5.437525242 |
| 1448461_a_at | 0.059169243  | 10.17839552 | 0.641647293  | 0.536426615 | 0.536426615 | -5.437525433 |
| 1450077_at   | -0.048067434 | 6.647287007 | -0.641561649 | 0.536479865 | 0.536479865 | -5.437576074 |
| 1421873_s_at | 0.04146087   | 8.319193884 | 0.641542203  | 0.536491956 | 0.536491956 | -5.437587571 |
| 1434708_at   | -0.040882069 | 8.562801524 | -0.641526039 | 0.536502007 | 0.536502007 | -5.437597128 |
| 1436636_at   | -0.063746781 | 6.326194528 | -0.641488564 | 0.536525309 | 0.536525309 | -5.437619283 |
| 1420692_at   | -0.066475982 | 3.829778168 | -0.641457619 | 0.536544551 | 0.536544551 | -5.437637578 |
| 1419520_at   | 0.04106598   | 5.597329865 | 0.641448276  | 0.536550361 | 0.536550361 | -5.437643101 |
| 1423794_at   | -0.074742479 | 6.684514863 | -0.641425705 | 0.536564396 | 0.536564396 | -5.437656444 |
| 1441255_at   | 0.053558692  | 3.761960584 | 0.641359625  | 0.536605488 | 0.536605488 | -5.437695504 |
| 1445101_at   | 0.068680885  | 3.364721896 | 0.641356841  | 0.536607219 | 0.536607219 | -5.43769715  |
| 1419721_at   | -0.067679677 | 5.382354386 | -0.641342457 | 0.536616164 | 0.536616164 | -5.437705652 |
| 1425397_at   | 0.049365656  | 4.825248134 | 0.641317453  | 0.536631714 | 0.536631714 | -5.437720431 |
| 1420916_at   | 0.04777294   | 8.489482419 | 0.641295709  | 0.536645236 | 0.536645236 | -5.437733283 |
| 1441326_at   | -0.056840817 | 3.251605109 | -0.641273789 | 0.536658868 | 0.536658868 | -5.437746238 |
| 1421155_at   | -0.041896071 | 7.382564586 | -0.641252624 | 0.536672031 | 0.536672031 | -5.437758746 |
| 1430993_at   | 0.062159933  | 4.427463401 | 0.641163735  | 0.536727313 | 0.536727313 | -5.437811276 |
| 1442185_at   | -0.054120702 | 5.632656981 | -0.641158747 | 0.536730416 | 0.536730416 | -5.437814224 |
| 1416246_a_at | 0.09221919   | 8.065741043 | 0.64112145   | 0.536753613 | 0.536753613 | -5.437836263 |
| 1424057_at   | 0.053934868  | 8.095552004 | 0.641081712  | 0.536778329 | 0.536778329 | -5.437859743 |
| 1418143_at   | -0.04472109  | 7.818193887 | -0.641060053 | 0.536791801 | 0.536791801 | -5.43787254  |
| 1425715_at   | -0.052175317 | 4.733541006 | -0.641047999 | 0.536799298 | 0.536799298 | -5.437879662 |
| 1433223_at   | -0.049592049 | 3.903204476 | -0.641028601 | 0.536811364 | 0.536811364 | -5.437891123 |
| 1431526_at   | 0.039941802  | 3.294395353 | 0.640939985  | 0.536866485 | 0.536866485 | -5.437943475 |

|              |              |             |              |             |             |              |
|--------------|--------------|-------------|--------------|-------------|-------------|--------------|
| 1428017_at   | 0.06457108   | 4.879328587 | 0.64091613   | 0.536881324 | 0.536881324 | -5.437957567 |
| 1447428_at   | 0.059279069  | 3.476949429 | 0.640908335  | 0.536886173 | 0.536886173 | -5.437962171 |
| 1440010_at   | 0.050448239  | 6.329793428 | 0.640859628  | 0.536916472 | 0.536916472 | -5.437990942 |
| 1454296_at   | -0.066447915 | 4.437404522 | -0.640832759 | 0.536933187 | 0.536933187 | -5.438006813 |
| 1459715_at   | 0.051591005  | 6.725250657 | 0.640817961  | 0.536942392 | 0.536942392 | -5.438015553 |
| 1436207_at   | -0.061062817 | 9.892780413 | -0.640798862 | 0.536954274 | 0.536954274 | -5.438026833 |
| 1450594_at   | -0.057996746 | 4.145105668 | -0.640798314 | 0.536954615 | 0.536954615 | -5.438027157 |
| 1458650_at   | -0.045827796 | 4.237129509 | -0.640707376 | 0.53701119  | 0.53701119  | -5.438080863 |
| 1423752_at   | 0.050517679  | 9.001220104 | 0.640706132  | 0.537011964 | 0.537011964 | -5.438081598 |
| 1417378_at   | -0.102743857 | 9.787194829 | -0.640690144 | 0.53702191  | 0.53702191  | -5.438091039 |
| 1451504_at   | 0.043085338  | 9.274954701 | 0.640652868  | 0.537045102 | 0.537045102 | -5.438113051 |
| 1448989_a_at | 0.051313632  | 8.974744243 | 0.64059236   | 0.537082748 | 0.537082748 | -5.438148779 |
| 1456994_at   | 0.044129179  | 3.034032793 | 0.64055252   | 0.537107537 | 0.537107537 | -5.438172302 |
| 1432872_at   | -0.068938275 | 4.03555138  | -0.640447904 | 0.537172632 | 0.537172632 | -5.438234064 |
| 1452805_at   | -0.051931115 | 7.145957586 | -0.640433669 | 0.53718149  | 0.53718149  | -5.438242468 |
| 1434701_at   | 0.057688211  | 9.69199884  | 0.640410243  | 0.537196067 | 0.537196067 | -5.438256296 |
| 1457883_at   | 0.081429427  | 6.192332846 | 0.640383047  | 0.53721299  | 0.53721299  | -5.438272349 |
| 1420121_at   | -0.048568213 | 3.131900283 | -0.64037283  | 0.537219348 | 0.537219348 | -5.43827838  |
| 1447798_at   | 0.054414159  | 3.103212329 | 0.6403563    | 0.537229634 | 0.537229634 | -5.438288137 |
| 1418136_at   | 0.047014665  | 9.352833596 | 0.640327318  | 0.537247669 | 0.537247669 | -5.438305243 |
| 1455567_at   | 0.06850806   | 7.148588065 | 0.640292231  | 0.537269505 | 0.537269505 | -5.438325952 |
| 1450112_a_at | -0.100864911 | 8.388615399 | -0.640251873 | 0.537294621 | 0.537294621 | -5.438349771 |
| 1439962_at   | 0.069513774  | 6.065407122 | 0.640251052  | 0.537295131 | 0.537295131 | -5.438350255 |
| 1416490_at   | -0.078018455 | 3.490045213 | -0.640218948 | 0.537315111 | 0.537315111 | -5.438369202 |
| 1440144_x_at | 0.052024203  | 3.92962006  | 0.640171728  | 0.537344499 | 0.537344499 | -5.438397067 |
| 1455657_at   | 0.129583575  | 7.781564101 | 0.640125376  | 0.537373347 | 0.537373347 | -5.438424418 |
| 1448641_at   | 0.045926934  | 10.44645016 | 0.640084132  | 0.537399017 | 0.537399017 | -5.438448754 |
| 1422476_at   | -0.057249205 | 9.015792703 | -0.640071341 | 0.537406978 | 0.537406978 | -5.4384563   |
| 1454795_at   | 0.053480925  | 4.878330043 | 0.640063027  | 0.537412153 | 0.537412153 | -5.438461206 |
| 1417223_at   | 0.043516019  | 9.181359049 | 0.640028369  | 0.537433725 | 0.537433725 | -5.438481653 |
| 1436159_at   | 0.041308024  | 9.523374367 | 0.640027841  | 0.537434053 | 0.537434053 | -5.438481965 |
| 1437482_at   | -0.133231447 | 4.168592408 | -0.640019235 | 0.53743941  | 0.53743941  | -5.438487042 |
| 1453553_at   | -0.058647932 | 4.51784238  | -0.640006778 | 0.537447164 | 0.537447164 | -5.438494392 |
| 1431269_at   | 0.051501622  | 3.44669548  | 0.63998839   | 0.53745861  | 0.53745861  | -5.43850524  |
| 1435026_at   | -0.056101569 | 6.852271058 | -0.639966589 | 0.53747218  | 0.53747218  | -5.438518101 |
| 1416900_s_at | -0.069346517 | 6.600660371 | -0.639947485 | 0.537484071 | 0.537484071 | -5.438529371 |
| 1423981_x_at | -0.039477788 | 6.421502325 | -0.63994092  | 0.537488157 | 0.537488157 | -5.438533243 |
| 1458311_at   | -0.054177034 | 7.012305662 | -0.639928263 | 0.537496036 | 0.537496036 | -5.43854071  |
| 1457529_x_at | 0.049897318  | 7.443332699 | 0.639914683  | 0.537504489 | 0.537504489 | -5.43854872  |
| 1433361_at   | 0.052977174  | 4.123595875 | 0.639833931  | 0.537554757 | 0.537554757 | -5.438596352 |
| 1449550_at   | -0.05208123  | 5.807665421 | -0.639755823 | 0.537603381 | 0.537603381 | -5.438642418 |
| 1459583_at   | 0.069978614  | 5.372418888 | 0.639737245  | 0.537614947 | 0.537614947 | -5.438653375 |
| 1426700_a_at | 0.053243194  | 8.455007549 | 0.639728747  | 0.537620237 | 0.537620237 | -5.438658386 |
| 1417976_at   | 0.081184419  | 5.869098053 | 0.639621236  | 0.537687171 | 0.537687171 | -5.438721783 |
| 1442089_at   | 0.062517913  | 3.261052529 | 0.639609639  | 0.537694391 | 0.537694391 | -5.438728621 |
| 1432339_at   | -0.058965554 | 3.906931714 | -0.639577107 | 0.537714646 | 0.537714646 | -5.438747802 |
| 1453517_at   | 0.049158929  | 3.726416477 | 0.639571965  | 0.537717848 | 0.537717848 | -5.438750834 |
| 1423989_at   | 0.05044334   | 8.125416877 | 0.639545062  | 0.537734598 | 0.537734598 | -5.438766696 |
| 1453250_at   | 0.054507449  | 3.861684699 | 0.639510151  | 0.537756335 | 0.537756335 | -5.438787278 |
| 1435961_at   | 0.050580423  | 6.018967644 | 0.63949186   | 0.537767724 | 0.537767724 | -5.438798061 |
| 1445693_at   | -0.050816372 | 7.638527849 | -0.639470279 | 0.537781162 | 0.537781162 | -5.438810784 |
| 1453436_at   | -0.073002581 | 3.946185427 | -0.639453396 | 0.537791675 | 0.537791675 | -5.438820736 |
| 1452914_at   | -0.053395951 | 4.459197962 | -0.639376135 | 0.537839784 | 0.537839784 | -5.438866279 |

|              |              |             |              |             |             |              |
|--------------|--------------|-------------|--------------|-------------|-------------|--------------|
| 1433099_at   | -0.057905833 | 3.996122777 | -0.639366141 | 0.537846007 | 0.537846007 | -5.43887217  |
| 1444055_at   | -0.075408802 | 4.089149339 | -0.6393439   | 0.537859857 | 0.537859857 | -5.438885279 |
| 1432789_at   | 0.047185427  | 3.901436788 | 0.639305294  | 0.537883898 | 0.537883898 | -5.438908033 |
| 1419127_at   | -0.055443949 | 5.547534887 | -0.639288072 | 0.537894622 | 0.537894622 | -5.438918183 |
| 1418356_at   | -0.05753737  | 6.648627582 | -0.639249606 | 0.537918577 | 0.537918577 | -5.438940852 |
| 1420695_at   | 0.062485278  | 5.447949305 | 0.639222149  | 0.537935676 | 0.537935676 | -5.438957033 |
| 1428137_at   | -0.096629499 | 7.195775464 | -0.63922191  | 0.537935825 | 0.537935825 | -5.438957174 |
| 1423311_s_at | -0.129872073 | 8.143550587 | -0.639152538 | 0.537979029 | 0.537979029 | -5.438998053 |
| 1418001_at   | 0.051938927  | 3.956472785 | 0.639123797  | 0.537996929 | 0.537996929 | -5.439014988 |
| 1454352_at   | 0.058837452  | 3.587516303 | 0.639107614  | 0.538007008 | 0.538007008 | -5.439024523 |
| 1457480_at   | -0.048834093 | 7.775888948 | -0.639088596 | 0.538018853 | 0.538018853 | -5.439035729 |
| 1448163_at   | -0.050860923 | 7.993005896 | -0.639071216 | 0.538029677 | 0.538029677 | -5.439045969 |
| 1421309_at   | -0.05615563  | 6.361288501 | -0.638866849 | 0.538156973 | 0.538156973 | -5.43916636  |
| 1424598_at   | 0.157341757  | 9.498161699 | 0.638866409  | 0.538157247 | 0.538157247 | -5.439166619 |
| 1421710_at   | -0.055330853 | 4.997442486 | -0.638835256 | 0.538176653 | 0.538176653 | -5.439184968 |
| 1420526_at   | -0.04445509  | 7.23184314  | -0.638793052 | 0.538202943 | 0.538202943 | -5.439209824 |
| 1451961_a_at | -0.04894275  | 5.396005781 | -0.638713338 | 0.538252602 | 0.538252602 | -5.439256769 |
| 1426156_at   | 0.057976117  | 4.039705484 | 0.638679695  | 0.538273562 | 0.538273562 | -5.43927658  |
| 1428265_at   | 0.051496361  | 9.562926276 | 0.638669088  | 0.53828017  | 0.53828017  | -5.439282826 |
| 1422609_at   | 0.04873141   | 9.335555721 | 0.638597868  | 0.538324541 | 0.538324541 | -5.439324761 |
| 1430768_at   | 0.062422102  | 3.68923233  | 0.638565691  | 0.538344589 | 0.538344589 | -5.439343706 |
| 1428216_s_at | 0.05951951   | 5.017172702 | 0.638433102  | 0.538427201 | 0.538427201 | -5.439421761 |
| 1454763_at   | -0.051386707 | 8.718026384 | -0.638418912 | 0.538436043 | 0.538436043 | -5.439430114 |
| 1427859_at   | 0.044196821  | 4.029924021 | 0.638402932  | 0.538446001 | 0.538446001 | -5.43943952  |
| 1419601_at   | 0.049010271  | 4.400444323 | 0.638377065  | 0.538462119 | 0.538462119 | -5.439454745 |
| 1424167_a_at | -0.039724535 | 7.86883135  | -0.63837317  | 0.538464546 | 0.538464546 | -5.439457038 |
| 1442896_at   | 0.049086733  | 4.03017012  | 0.638289634  | 0.538516601 | 0.538516601 | -5.439506204 |
| 1448254_at   | 0.060433495  | 11.50923494 | 0.638282336  | 0.538521149 | 0.538521149 | -5.439510499 |
| 1460205_at   | -0.073762331 | 8.853736279 | -0.638263779 | 0.538532713 | 0.538532713 | -5.43952142  |
| 1451257_at   | -0.059262858 | 4.1776833   | -0.638244937 | 0.538544455 | 0.538544455 | -5.439532508 |
| 1434301_at   | 0.063235154  | 5.869906066 | 0.63803899   | 0.538672806 | 0.538672806 | -5.439653688 |
| 1450422_a_at | 0.044988378  | 8.941670136 | 0.637988502  | 0.538704274 | 0.538704274 | -5.43968339  |
| 1434454_at   | -0.05487725  | 5.374624815 | -0.637915455 | 0.538749804 | 0.538749804 | -5.439726359 |
| 1429826_at   | -0.068160793 | 3.74250136  | -0.637879214 | 0.538772394 | 0.538772394 | -5.439747676 |
| 1453878_at   | 0.051515294  | 4.104343885 | 0.637863406  | 0.538782248 | 0.538782248 | -5.439756974 |
| 1423371_at   | 0.04092053   | 8.001799601 | 0.637829177  | 0.538803585 | 0.538803585 | -5.439777106 |
| 1435600_s_at | -0.069022617 | 5.938637607 | -0.637816423 | 0.538811535 | 0.538811535 | -5.439784607 |
| 1447949_at   | -0.061247852 | 5.84654911  | -0.637671973 | 0.538901584 | 0.538901584 | -5.439869553 |
| 1455927_x_at | 0.058927574  | 8.892965858 | 0.637613701  | 0.538937913 | 0.538937913 | -5.439903816 |
| 1445291_at   | -0.051003633 | 4.902615386 | -0.637562779 | 0.53896966  | 0.53896966  | -5.439933755 |
| 1421672_at   | 0.051037745  | 4.340741145 | 0.637545605  | 0.538980368 | 0.538980368 | -5.439943852 |
| 1455059_at   | -0.067629957 | 7.465339623 | -0.637506697 | 0.539004627 | 0.539004627 | -5.439966726 |
| 1447378_at   | -0.051249376 | 3.369517235 | -0.637481202 | 0.539020523 | 0.539020523 | -5.439981713 |
| 1438038_at   | 0.048261706  | 8.515052584 | 0.637387174  | 0.539079151 | 0.539079151 | -5.440036983 |
| 1452286_at   | 0.046635013  | 9.440053094 | 0.637343269  | 0.539106528 | 0.539106528 | -5.440062789 |
| 1424746_at   | 0.040606115  | 9.245995168 | 0.63733625   | 0.539110905 | 0.539110905 | -5.440066914 |
| 1437128_a_at | 0.092776247  | 6.20553739  | 0.637256918  | 0.539160375 | 0.539160375 | -5.440113537 |
| 1435756_at   | -0.052079739 | 5.599040812 | -0.637197915 | 0.53919717  | 0.53919717  | -5.440148209 |
| 1446379_at   | 0.047719961  | 3.772273797 | 0.637169454  | 0.539214919 | 0.539214919 | -5.440164933 |
| 1425314_at   | -0.057356313 | 4.337549592 | -0.637141423 | 0.5392324   | 0.5392324   | -5.440181403 |
| 1454150_at   | -0.049056983 | 4.574695989 | -0.637107118 | 0.539253795 | 0.539253795 | -5.440201559 |
| 1432224_at   | 0.06207144   | 4.051409588 | 0.637098232  | 0.539259336 | 0.539259336 | -5.44020678  |
| 1418837_at   | -0.056603419 | 4.993910723 | -0.637090694 | 0.539264038 | 0.539264038 | -5.440211209 |



|              |              |             |              |             |             |              |
|--------------|--------------|-------------|--------------|-------------|-------------|--------------|
| 1417961_a_at | 0.119306934  | 5.696222998 | 0.637086687  | 0.539266537 | 0.539266537 | -5.440213563 |
| 1424827_a_at | 0.04370224   | 11.74219202 | 0.637075477  | 0.539273528 | 0.539273528 | -5.440220149 |
| 1442902_at   | -0.042888146 | 3.707351073 | -0.637064922 | 0.539280111 | 0.539280111 | -5.44022635  |
| 1457172_at   | 0.045408099  | 5.168539487 | 0.637059349  | 0.539283587 | 0.539283587 | -5.440229625 |
| 1458844_at   | -0.063257446 | 3.800922471 | -0.637059056 | 0.539283769 | 0.539283769 | -5.440229796 |
| 1457998_at   | 0.078967632  | 3.924224629 | 0.637025205  | 0.539304882 | 0.539304882 | -5.440249684 |
| 1420930_s_at | 0.057650101  | 7.412429708 | 0.637001497  | 0.539319669 | 0.539319669 | -5.440263611 |
| 1423045_at   | 0.042005716  | 9.960974406 | 0.636979294  | 0.539333517 | 0.539333517 | -5.440276654 |
| 1457073_at   | 0.048354541  | 7.95396006  | 0.636930991  | 0.539363644 | 0.539363644 | -5.440305027 |
| 1431143_x_at | 0.048929661  | 6.721836746 | 0.636777824  | 0.539459185 | 0.539459185 | -5.440394986 |
| 1424437_s_at | -0.076316616 | 6.186406507 | -0.63674917  | 0.53947706  | 0.53947706  | -5.440411813 |
| 1453566_at   | -0.045860772 | 5.358950736 | -0.636745533 | 0.539479329 | 0.539479329 | -5.440413949 |
| 1453368_at   | -0.061332095 | 6.615577927 | -0.636714132 | 0.539498917 | 0.539498917 | -5.440432388 |
| 1422039_at   | 0.052568867  | 5.474851964 | 0.636673842  | 0.539524051 | 0.539524051 | -5.440456046 |
| 1425638_at   | -0.054975181 | 4.105506236 | -0.63665759  | 0.53953419  | 0.53953419  | -5.440465589 |
| 1418256_at   | -0.076339225 | 7.129032594 | -0.636614061 | 0.539561346 | 0.539561346 | -5.440491146 |
| 1433961_at   | -0.051546022 | 7.786346211 | -0.636595407 | 0.539572984 | 0.539572984 | -5.440502098 |
| 1441614_at   | -0.045154071 | 4.790775816 | -0.636594453 | 0.539573579 | 0.539573579 | -5.440502659 |
| 1419830_at   | 0.051830133  | 3.309138021 | 0.636559401  | 0.539595448 | 0.539595448 | -5.440523238 |
| 1450895_a_at | -0.053082925 | 8.921411492 | -0.63654604  | 0.539603783 | 0.539603783 | -5.440531081 |
| 1420792_at   | -0.042691218 | 3.32841316  | -0.636541976 | 0.539606318 | 0.539606318 | -5.440533467 |
| 1429979_a_at | -0.066814768 | 8.040645498 | -0.636534416 | 0.539611036 | 0.539611036 | -5.440537905 |
| 1446228_at   | -0.056787182 | 5.887033167 | -0.63651756  | 0.539621552 | 0.539621552 | -5.440547801 |
| 1451377_a_at | -0.048681423 | 8.411093094 | -0.636455129 | 0.539660504 | 0.539660504 | -5.440584448 |
| 1419422_at   | -0.077709509 | 3.964550324 | -0.636448123 | 0.539664875 | 0.539664875 | -5.440588561 |
| 1460117_at   | -0.081963161 | 5.533693926 | -0.636332849 | 0.539736802 | 0.539736802 | -5.44065622  |
| 1446000_at   | 0.061839344  | 5.954218231 | 0.636321264  | 0.539744031 | 0.539744031 | -5.440663019 |
| 1432493_at   | 0.054889971  | 3.276649344 | 0.636255845  | 0.539784853 | 0.539784853 | -5.44070141  |
| 1432447_a_at | -0.060121178 | 8.764544441 | -0.636240909 | 0.539794173 | 0.539794173 | -5.440710175 |
| 1421245_at   | -0.051037345 | 4.057983574 | -0.636212338 | 0.539812003 | 0.539812003 | -5.44072694  |
| 1420556_at   | -0.053988714 | 7.44509476  | -0.636156947 | 0.539846569 | 0.539846569 | -5.440759442 |
| 1458272_at   | 0.064232128  | 3.67031458  | 0.636152648  | 0.539849252 | 0.539849252 | -5.440761964 |
| 1430073_at   | 0.074083451  | 4.995045989 | 0.636126309  | 0.539865689 | 0.539865689 | -5.440777418 |
| 1456107_x_at | 0.054951102  | 9.871443421 | 0.63600673   | 0.539940318 | 0.539940318 | -5.440847571 |
| 1460614_at   | 0.05218237   | 9.623844845 | 0.635981454  | 0.539956094 | 0.539956094 | -5.440862398 |
| 1459271_at   | -0.078774118 | 3.951373172 | -0.635973702 | 0.539960932 | 0.539960932 | -5.440866945 |
| 1436945_x_at | -0.04802208  | 7.552164658 | -0.635960254 | 0.539969326 | 0.539969326 | -5.440874834 |
| 1436074_at   | 0.087701444  | 5.112084243 | 0.635945402  | 0.539978596 | 0.539978596 | -5.440883545 |
| 1434000_at   | 0.040429457  | 10.09162386 | 0.635942966  | 0.539980116 | 0.539980116 | -5.440884974 |
| 1433641_at   | 0.045054568  | 9.635124981 | 0.635856877  | 0.54003385  | 0.54003385  | -5.440935468 |
| 1431696_at   | 0.065363174  | 4.324232877 | 0.635836711  | 0.540046438 | 0.540046438 | -5.440947295 |
| 1432971_at   | -0.078971226 | 4.628811927 | -0.635824948 | 0.54005378  | 0.54005378  | -5.440954193 |
| 1417275_at   | -0.181573945 | 7.019887193 | -0.63572831  | 0.540114103 | 0.540114103 | -5.441010864 |
| 1456167_at   | -0.057955734 | 6.302546607 | -0.635664801 | 0.540153749 | 0.540153749 | -5.441048103 |
| 1425775_at   | 0.065050258  | 5.598555545 | 0.635654687  | 0.540160063 | 0.540160063 | -5.441054033 |
| 1432731_at   | -0.054954355 | 4.748118134 | -0.635646589 | 0.540165118 | 0.540165118 | -5.441058781 |
| 1445675_at   | 0.052777872  | 3.27143833  | 0.635551353  | 0.540224574 | 0.540224574 | -5.441114615 |
| 1446637_at   | 0.089734736  | 3.836753572 | 0.63552625   | 0.540240246 | 0.540240246 | -5.441129332 |
| 1444939_at   | -0.05241798  | 4.377925077 | -0.635523788 | 0.540241783 | 0.540241783 | -5.441130775 |
| 1452168_x_at | -0.041821432 | 9.978317399 | -0.635434425 | 0.540297577 | 0.540297577 | -5.441183157 |
| 1445850_at   | -0.098477432 | 5.013998279 | -0.635432639 | 0.540298692 | 0.540298692 | -5.441184204 |
| 1418345_at   | 0.053491335  | 6.347149471 | 0.635276198  | 0.540396373 | 0.540396373 | -5.441275889 |
| 1432188_s_at | 0.043849476  | 8.553980754 | 0.635149961  | 0.540475203 | 0.540475203 | -5.441349858 |

|              |              |             |              |             |             |              |
|--------------|--------------|-------------|--------------|-------------|-------------|--------------|
| 1448758_at   | 0.050669059  | 8.622805816 | 0.635142338  | 0.540479964 | 0.540479964 | -5.441354325 |
| 1457550_at   | 0.081062022  | 4.982658356 | 0.635138723  | 0.540482221 | 0.540482221 | -5.441356442 |
| 1432752_at   | 0.040265956  | 3.989677581 | 0.635072194  | 0.540523769 | 0.540523769 | -5.441395419 |
| 1452534_a_at | 0.059619589  | 10.85350647 | 0.635045885  | 0.540540199 | 0.540540199 | -5.441410832 |
| 1423181_s_at | 0.048617031  | 9.751000158 | 0.635022357  | 0.540554893 | 0.540554893 | -5.441424614 |
| 1416429_a_at | 0.073138129  | 9.038315902 | 0.635008762  | 0.540563384 | 0.540563384 | -5.441432578 |
| 1457275_at   | -0.108064289 | 4.557331871 | -0.634990529 | 0.540574771 | 0.540574771 | -5.441443258 |
| 1440995_at   | -0.043312515 | 4.522402804 | -0.634954654 | 0.540597177 | 0.540597177 | -5.441464272 |
| 1439664_at   | -0.044437564 | 7.219454593 | -0.634945573 | 0.540602849 | 0.540602849 | -5.441469592 |
| 1453545_at   | -0.043396689 | 5.720647563 | -0.634885739 | 0.54064022  | 0.54064022  | -5.441504636 |
| 1448093_s_at | 0.089836875  | 4.566812882 | 0.634783815  | 0.540703884 | 0.540703884 | -5.441564327 |
| 1422239_at   | -0.090674436 | 4.623047947 | -0.634743861 | 0.540728841 | 0.540728841 | -5.441587723 |
| 1422174_at   | -0.071847158 | 3.69251791  | -0.634736204 | 0.540733624 | 0.540733624 | -5.441592207 |
| 1438557_x_at | 0.053306092  | 10.08767595 | 0.634720522  | 0.54074342  | 0.54074342  | -5.441601389 |
| 1420826_at   | 0.07406734   | 7.421819865 | 0.634666938  | 0.540776893 | 0.540776893 | -5.441632764 |
| 1445638_at   | 0.172779244  | 6.074616815 | 0.634662783  | 0.540779488 | 0.540779488 | -5.441635196 |
| 1457852_at   | 0.081993082  | 5.013196817 | 0.634651101  | 0.540786786 | 0.540786786 | -5.441642036 |
| 1426941_at   | 0.087605036  | 3.909323017 | 0.634644481  | 0.540790921 | 0.540790921 | -5.441645912 |
| 1449655_a_at | -0.050774172 | 7.251716277 | -0.634584598 | 0.540828331 | 0.540828331 | -5.441680971 |
| 1454319_at   | 0.054368377  | 3.927224993 | 0.634548937  | 0.540850609 | 0.540850609 | -5.441701847 |
| 1416202_at   | 0.055100727  | 10.36110731 | 0.634548685  | 0.540850766 | 0.540850766 | -5.441701994 |
| 1442755_at   | 0.063582888  | 3.497448642 | 0.634535756  | 0.540858844 | 0.540858844 | -5.441709563 |
| 1421892_at   | -0.070012703 | 7.192334526 | -0.63448024  | 0.540893528 | 0.540893528 | -5.44174206  |
| 1447967_at   | 0.045294364  | 4.993545404 | 0.6344365    | 0.540920855 | 0.540920855 | -5.441767661 |
| 1428890_at   | 0.040738752  | 9.242728438 | 0.634417509  | 0.540932721 | 0.540932721 | -5.441778777 |
| 1420220_x_at | 0.04884172   | 5.470528058 | 0.63439201   | 0.540948652 | 0.540948652 | -5.441793701 |
| 1441120_at   | 0.089656147  | 4.060349357 | 0.634354621  | 0.540972014 | 0.540972014 | -5.441815583 |
| 1433726_at   | 0.059465013  | 9.502984441 | 0.634333082  | 0.540985472 | 0.540985472 | -5.441828188 |
| 1427091_at   | 0.042563276  | 6.607327658 | 0.634244754  | 0.541040663 | 0.541040663 | -5.441879876 |
| 1458176_at   | 0.043118967  | 5.992393226 | 0.634243013  | 0.541041751 | 0.541041751 | -5.441880894 |
| 1453747_at   | 0.086337297  | 6.820668857 | 0.634172958  | 0.541085527 | 0.541085527 | -5.441921884 |
| 1443736_at   | 0.073861697  | 6.289899093 | 0.634134605  | 0.541109494 | 0.541109494 | -5.441944323 |
| 1446782_at   | 0.051450352  | 4.935707698 | 0.633999401  | 0.541193988 | 0.541193988 | -5.442023417 |
| 1450515_at   | -0.07156809  | 4.256825924 | -0.633986888 | 0.541201809 | 0.541201809 | -5.442030736 |
| 1419401_at   | 0.071208752  | 4.663415635 | 0.63392559   | 0.541240119 | 0.541240119 | -5.442066589 |
| 1458217_s_at | -0.073706242 | 5.747328966 | -0.633902083 | 0.541254811 | 0.541254811 | -5.442080338 |
| 1453893_at   | 0.069404591  | 3.767567277 | 0.633886584  | 0.541264498 | 0.541264498 | -5.442089402 |
| 1450917_at   | -0.27935141  | 6.034209291 | -0.633864975 | 0.541278005 | 0.541278005 | -5.44210204  |
| 1430607_at   | -0.062499153 | 4.477620055 | -0.633819885 | 0.541306187 | 0.541306187 | -5.442128409 |
| 1437842_at   | 0.086621896  | 3.714323787 | 0.633788736  | 0.541325657 | 0.541325657 | -5.442146624 |
| 1427071_at   | -0.04753536  | 6.72097722  | -0.633763348 | 0.541341526 | 0.541341526 | -5.442161469 |
| 1456124_x_at | -0.049424836 | 3.866003279 | -0.633642661 | 0.541416967 | 0.541416967 | -5.442232034 |
| 1433637_at   | -0.050949603 | 7.268928854 | -0.633617036 | 0.541432986 | 0.541432986 | -5.442247015 |
| 1444773_at   | 0.048969383  | 6.062555904 | 0.633538003  | 0.541482392 | 0.541482392 | -5.442293216 |
| 1457313_at   | 0.048382138  | 7.097298542 | 0.633476436  | 0.541520883 | 0.541520883 | -5.442329204 |
| 1431436_a_at | -0.072488343 | 5.694074787 | -0.633453092 | 0.541535477 | 0.541535477 | -5.442342848 |
| 1458983_at   | -0.054182964 | 3.740725729 | -0.633447501 | 0.541538973 | 0.541538973 | -5.442346116 |
| 1449649_at   | 0.067800343  | 4.195919726 | 0.633437734  | 0.541545079 | 0.541545079 | -5.442351824 |
| 1427256_at   | -0.05387482  | 11.61186178 | -0.633430152 | 0.54154982  | 0.54154982  | -5.442356256 |
| 1426090_a_at | 0.041462132  | 6.621689993 | 0.633420819  | 0.541555654 | 0.541555654 | -5.44236171  |
| 1450707_at   | -0.046831082 | 5.625297483 | -0.633401867 | 0.541567504 | 0.541567504 | -5.442372787 |
| 1446715_at   | 0.05211488   | 3.39923941  | 0.633380819  | 0.541580663 | 0.541580663 | -5.442385087 |
| 1442907_at   | -0.042918255 | 4.728218284 | -0.633342428 | 0.541604667 | 0.541604667 | -5.442407524 |

|              |              |             |              |             |             |              |
|--------------|--------------|-------------|--------------|-------------|-------------|--------------|
| 1433463_at   | 0.045927622  | 9.592997027 | 0.6333293    | 0.541612875 | 0.541612875 | -5.442415195 |
| 1421163_a_at | 0.053999249  | 9.186240167 | 0.633322327  | 0.541617235 | 0.541617235 | -5.44241927  |
| 1427474_s_at | 0.047108963  | 6.110666041 | 0.63327645   | 0.54164592  | 0.54164592  | -5.442446079 |
| 1459031_at   | 0.055199393  | 3.687270951 | 0.633171318  | 0.541711658 | 0.541711658 | -5.442507505 |
| 1443590_at   | -0.040784348 | 6.059659705 | -0.633093827 | 0.541760116 | 0.541760116 | -5.442552777 |
| 1437197_at   | 0.081071439  | 7.55255791  | 0.63308006   | 0.541768726 | 0.541768726 | -5.442560819 |
| 1447075_at   | 0.058252748  | 3.504854503 | 0.633027436  | 0.541801634 | 0.541801634 | -5.442591559 |
| 1444155_at   | 0.043798538  | 7.131857296 | 0.633021033  | 0.541805639 | 0.541805639 | -5.442595299 |
| 1424131_at   | -0.065130068 | 12.21385731 | -0.633016243 | 0.541808635 | 0.541808635 | -5.442598097 |
| 1441309_at   | 0.054657229  | 5.417558807 | 0.63300062   | 0.541818405 | 0.541818405 | -5.442607223 |
| 1455511_at   | 0.063179978  | 6.982155782 | 0.632981263  | 0.541830511 | 0.541830511 | -5.442618529 |
| 1438688_at   | 0.04295283   | 11.6858126  | 0.632977373  | 0.541832944 | 0.541832944 | -5.442620801 |
| 1450215_at   | 0.050459314  | 3.49575761  | 0.632964412  | 0.541841049 | 0.541841049 | -5.442628371 |
| 1457165_at   | -0.062944622 | 5.119022238 | -0.632942813 | 0.541854557 | 0.541854557 | -5.442640986 |
| 1419678_at   | -0.072704451 | 7.053785611 | -0.632934217 | 0.541859933 | 0.541859933 | -5.442646007 |
| 1451963_at   | 0.053651903  | 3.571902958 | 0.632929823  | 0.541862681 | 0.541862681 | -5.442648573 |
| 1426739_at   | 0.048846659  | 8.474751656 | 0.632924933  | 0.54186574  | 0.54186574  | -5.442651429 |
| 1447019_at   | 0.041606672  | 5.055314031 | 0.632902412  | 0.541879825 | 0.541879825 | -5.442664582 |
| 1425959_x_at | 0.047190274  | 3.092986055 | 0.63289641   | 0.541883579 | 0.541883579 | -5.442668087 |
| 1421269_at   | -0.062343319 | 7.317317107 | -0.632870339 | 0.541899885 | 0.541899885 | -5.442683313 |
| 1419502_at   | 0.060977835  | 5.82242161  | 0.632852344  | 0.541911139 | 0.541911139 | -5.442693821 |
| 1448258_a_at | -0.042970395 | 11.75135628 | -0.632838317 | 0.541919913 | 0.541919913 | -5.442702013 |
| 1443288_at   | -0.057287037 | 4.098087458 | -0.632827133 | 0.541926908 | 0.541926908 | -5.442708544 |
| 1425049_at   | -0.067703055 | 4.373201065 | -0.632820527 | 0.54193104  | 0.54193104  | -5.442712402 |
| 1460688_s_at | 0.042974192  | 8.968488174 | 0.632804525  | 0.541941049 | 0.541941049 | -5.442721746 |
| 1459001_at   | 0.067712005  | 5.217753666 | 0.632767361  | 0.541964294 | 0.541964294 | -5.442743446 |
| 1435975_at   | -0.044033741 | 6.590301372 | -0.63273513  | 0.541984454 | 0.541984454 | -5.442762266 |
| 1460544_at   | 0.0451279    | 8.848773812 | 0.632688324  | 0.542013732 | 0.542013732 | -5.442789594 |
| 1440278_at   | -0.069844767 | 7.133775236 | -0.63255776  | 0.542095406 | 0.542095406 | -5.442865815 |
| 1428846_at   | -0.073947026 | 6.649979455 | -0.632557056 | 0.542095846 | 0.542095846 | -5.442866226 |
| 1440933_at   | 0.064476708  | 4.959917293 | 0.632543932  | 0.542104056 | 0.542104056 | -5.442873887 |
| 1442667_at   | 0.050041159  | 6.693185176 | 0.632485692  | 0.54214049  | 0.54214049  | -5.442907881 |
| 1450438_at   | 0.049221795  | 4.97163247  | 0.632344918  | 0.542228563 | 0.542228563 | -5.442990038 |
| 1458101_at   | -0.052798217 | 5.041482878 | -0.632299529 | 0.542256962 | 0.542256962 | -5.443016524 |
| 1458315_at   | -0.052338315 | 3.443543012 | -0.632201288 | 0.542318432 | 0.542318432 | -5.443073845 |
| 1429848_at   | -0.101836151 | 4.261415005 | -0.632183102 | 0.542329811 | 0.542329811 | -5.443084455 |
| 1452882_at   | -0.041483149 | 7.695797349 | -0.632129473 | 0.542363369 | 0.542363369 | -5.443115742 |
| 1438006_at   | 0.048496077  | 8.465647931 | 0.632070623  | 0.542400196 | 0.542400196 | -5.443150072 |
| 1444046_at   | 0.039949231  | 5.478259537 | 0.632025655  | 0.542428336 | 0.542428336 | -5.443176301 |
| 1425445_a_at | 0.051148704  | 4.057886268 | 0.631999078  | 0.542444968 | 0.542444968 | -5.443191803 |
| 1420016_at   | -0.051456621 | 4.384191518 | -0.631954579 | 0.542472817 | 0.542472817 | -5.443217757 |
| 1442982_at   | 0.049378306  | 8.590634439 | 0.631927017  | 0.542490066 | 0.542490066 | -5.443233832 |
| 1442232_at   | -0.056741168 | 4.517338046 | -0.63190656  | 0.542502868 | 0.542502868 | -5.443245762 |
| 1436806_at   | -0.052458241 | 5.462895357 | -0.631873736 | 0.542523412 | 0.542523412 | -5.443264904 |
| 1434741_at   | 0.045454024  | 6.29738936  | 0.631806251  | 0.542565649 | 0.542565649 | -5.443304256 |
| 1437763_at   | 0.05432521   | 7.219779519 | 0.631781052  | 0.542581421 | 0.542581421 | -5.44331895  |
| 1425885_a_at | 0.04735764   | 5.367347268 | 0.631745418  | 0.542603724 | 0.542603724 | -5.443339726 |
| 1454147_at   | 0.042067016  | 3.265370928 | 0.631684072  | 0.542642123 | 0.542642123 | -5.443375493 |
| 1442625_at   | 0.057435371  | 6.551385965 | 0.631647038  | 0.542665304 | 0.542665304 | -5.443397083 |
| 1431567_at   | -0.090886873 | 5.967650101 | -0.631607074 | 0.54269032  | 0.54269032  | -5.44342038  |
| 1459819_at   | -0.041954859 | 4.273860698 | -0.631538856 | 0.542733024 | 0.542733024 | -5.443460144 |
| 1440460_at   | -0.045728098 | 4.234880378 | -0.631518592 | 0.542745709 | 0.542745709 | -5.443471955 |
| 1418045_at   | -0.04033509  | 7.3266782   | -0.631491115 | 0.54276291  | 0.54276291  | -5.44348797  |

|                   |              |             |              |             |             |              |
|-------------------|--------------|-------------|--------------|-------------|-------------|--------------|
| 1427272_at        | 0.072551105  | 3.559105192 | 0.631468857  | 0.542776844 | 0.542776844 | -5.443500943 |
| 1427739_a_at      | 0.062720618  | 8.86529079  | 0.631461932  | 0.542781179 | 0.542781179 | -5.443504979 |
| 1424723_s_at      | -0.060191354 | 9.682235906 | -0.631442703 | 0.542793218 | 0.542793218 | -5.443516186 |
| 1422051_a_at      | 0.06163935   | 6.184381515 | 0.6313688    | 0.542839485 | 0.542839485 | -5.443559254 |
| 1439486_at        | -0.062798975 | 4.879012138 | -0.631335593 | 0.542860275 | 0.542860275 | -5.443578604 |
| 1447330_at        | -0.040400236 | 4.405339324 | -0.63132578  | 0.542866419 | 0.542866419 | -5.443584322 |
| 1428261_at        | -0.046690577 | 7.587969985 | -0.631214464 | 0.542936116 | 0.542936116 | -5.44364918  |
| 1428723_at        | 0.074176359  | 7.07547779  | 0.631125012  | 0.542992127 | 0.542992127 | -5.443701292 |
| 1456491_at        | -0.055174449 | 4.187294635 | -0.631100083 | 0.543007737 | 0.543007737 | -5.443715813 |
| 1443242_at        | -0.071453133 | 4.03626642  | -0.630990037 | 0.543076649 | 0.543076649 | -5.443779911 |
| 1450128_at        | -0.051785147 | 5.079098391 | -0.630955865 | 0.543098048 | 0.543098048 | -5.443799813 |
| 1453099_at        | 0.046561199  | 9.792119115 | 0.630945738  | 0.543104391 | 0.543104391 | -5.443805711 |
| 1446480_at        | -0.049019782 | 3.937480796 | -0.630885243 | 0.543142276 | 0.543142276 | -5.44384094  |
| 1423042_at        | -0.057912254 | 11.86393136 | -0.630861136 | 0.543157374 | 0.543157374 | -5.443854978 |
| 1445832_at        | 0.049244693  | 4.006968037 | 0.630848126  | 0.543165522 | 0.543165522 | -5.443862554 |
| 1459774_at        | 0.061006748  | 5.962293635 | 0.6308228    | 0.543181384 | 0.543181384 | -5.443877301 |
| 1440709_at        | -0.056080787 | 5.734466231 | -0.630796114 | 0.543198098 | 0.543198098 | -5.443892839 |
| 1429574_at        | 0.056934285  | 4.343212536 | 0.630739285  | 0.543233691 | 0.543233691 | -5.443925927 |
| 1423510_at        | 0.040086123  | 3.621638245 | 0.630714826  | 0.543249011 | 0.543249011 | -5.443940167 |
| 1442311_at        | 0.066896294  | 8.702423179 | 0.630697067  | 0.543260134 | 0.543260134 | -5.443950506 |
| 1434835_at        | -0.072125973 | 8.897975566 | -0.630668854 | 0.543277805 | 0.543277805 | -5.44396693  |
| 1423333_at        | -0.046975856 | 8.45856356  | -0.630597757 | 0.543322339 | 0.543322339 | -5.444008317 |
| 1440443_at        | 0.089467922  | 6.869736494 | 0.630461809  | 0.543407501 | 0.543407501 | -5.444087442 |
| 1448691_at        | -0.097928203 | 8.665702053 | -0.630407123 | 0.543441759 | 0.543441759 | -5.444119267 |
| 1425298_a_at      | -0.066100533 | 3.503696887 | -0.630403727 | 0.543443887 | 0.543443887 | -5.444121243 |
| 1424271_at        | 0.067785133  | 8.874680982 | 0.63031709   | 0.543498165 | 0.543498165 | -5.444171656 |
| 1447854_s_at      | 0.16631895   | 7.081500432 | 0.630302137  | 0.543507533 | 0.543507533 | -5.444180356 |
| 1421684_at        | 0.049664933  | 3.809967238 | 0.630251969  | 0.543538965 | 0.543538965 | -5.444209545 |
| 1437152_at        | 0.085560998  | 9.367882633 | 0.630229718  | 0.543552906 | 0.543552906 | -5.444222491 |
| 1431433_at        | 0.046850282  | 5.054464583 | 0.630219785  | 0.54355913  | 0.54355913  | -5.444228269 |
| 1444173_at        | -0.077743824 | 4.861236518 | -0.630205718 | 0.543567944 | 0.543567944 | -5.444236453 |
| 1459013_at        | 0.05368844   | 3.500298134 | 0.630200903  | 0.54357096  | 0.54357096  | -5.444239254 |
| 1417106_at        | -0.039204155 | 9.772312514 | -0.630165688 | 0.543593025 | 0.543593025 | -5.44425974  |
| 1424430_at        | -0.052699713 | 8.005334452 | -0.630159708 | 0.543596772 | 0.543596772 | -5.444263219 |
| 1444858_at        | 0.060336329  | 5.953107721 | 0.630158103  | 0.543597777 | 0.543597777 | -5.444264152 |
| 1433636_at        | -0.044439284 | 8.939685793 | -0.630111505 | 0.543626976 | 0.543626976 | -5.444291259 |
| 1423696_a_at      | 0.077723821  | 10.29136244 | 0.630024928  | 0.543681226 | 0.543681226 | -5.444341615 |
| 1450235_at        | -0.045130565 | 5.921193925 | -0.629986053 | 0.543705587 | 0.543705587 | -5.444364225 |
| 1450661_x_at      | 0.103284548  | 6.805640498 | 0.629986013  | 0.543705612 | 0.543705612 | -5.444364248 |
| 1421306_a_at      | 0.062207721  | 4.757573915 | 0.629923755  | 0.543744627 | 0.543744627 | -5.444400454 |
| AFFX-PyruCarbMur/ | -0.065423275 | 5.725887677 | -0.629919635 | 0.543747209 | 0.543747209 | -5.444402849 |
| 1442548_at        | 0.059575584  | 5.529387946 | 0.62984226   | 0.5437957   | 0.5437957   | -5.444447842 |
| 1459168_at        | 0.077533197  | 7.477105513 | 0.629832329  | 0.543801924 | 0.543801924 | -5.444453617 |
| 1421647_at        | 0.067723505  | 5.641462773 | 0.629775388  | 0.54383761  | 0.54383761  | -5.444486723 |
| 1417940_s_at      | 0.039314228  | 6.799945321 | 0.629740493  | 0.543859481 | 0.543859481 | -5.444507011 |
| 1445285_at        | -0.052409366 | 5.294873373 | -0.629693673 | 0.543888826 | 0.543888826 | -5.444534229 |
| 1430625_at        | 0.058237349  | 3.178320721 | 0.629631914  | 0.543927536 | 0.543927536 | -5.44457013  |
| 1444018_at        | -0.065747657 | 5.385439632 | -0.629609365 | 0.543941669 | 0.543941669 | -5.444583237 |
| 1437765_at        | 0.059459953  | 4.940567848 | 0.629606264  | 0.543943613 | 0.543943613 | -5.444585039 |
| 1455445_at        | 0.074082534  | 4.006883768 | 0.629605152  | 0.54394431  | 0.54394431  | -5.444585686 |
| 1422114_at        | 0.05129192   | 4.169421039 | 0.62960039   | 0.543947295 | 0.543947295 | -5.444588453 |
| 1439857_at        | -0.083634756 | 7.184854867 | -0.629581093 | 0.543959391 | 0.543959391 | -5.44459967  |
| 1427775_at        | -0.04221726  | 3.704313174 | -0.629537761 | 0.543986553 | 0.543986553 | -5.444624855 |

|              |              |             |              |             |             |              |
|--------------|--------------|-------------|--------------|-------------|-------------|--------------|
| 1421742_at   | -0.046665479 | 4.415241743 | -0.629430692 | 0.54405367  | 0.54405367  | -5.444687078 |
| 1423865_at   | -0.046253351 | 7.61673097  | -0.629397383 | 0.544074551 | 0.544074551 | -5.444706434 |
| 1430764_at   | 0.06429017   | 3.971159682 | 0.629360536  | 0.544097651 | 0.544097651 | -5.444727845 |
| 1457590_at   | -0.044256089 | 3.756593234 | -0.629329082 | 0.54411737  | 0.54411737  | -5.44474612  |
| 1425024_at   | 0.062574012  | 5.283273673 | 0.629309917  | 0.544129385 | 0.544129385 | -5.444757256 |
| 1450032_at   | 0.061434593  | 5.65631487  | 0.629243103  | 0.544171275 | 0.544171275 | -5.444796074 |
| 1447923_at   | 0.082221627  | 8.67623044  | 0.629175143  | 0.544213884 | 0.544213884 | -5.444835553 |
| 1441256_at   | -0.062671564 | 3.666782568 | -0.629150357 | 0.544229425 | 0.544229425 | -5.44484995  |
| 1458388_at   | 0.061332248  | 3.731918002 | 0.629110387  | 0.544254486 | 0.544254486 | -5.444873167 |
| 1445304_at   | -0.062487895 | 5.068765382 | -0.629089367 | 0.544267667 | 0.544267667 | -5.444885376 |
| 1423184_at   | 0.085257994  | 6.0252571   | 0.629043135  | 0.544296656 | 0.544296656 | -5.444912228 |
| 1446760_at   | -0.072967852 | 3.789288835 | -0.62903549  | 0.544301449 | 0.544301449 | -5.444916668 |
| 1444289_at   | 0.057817284  | 5.994565087 | 0.629012852  | 0.544315645 | 0.544315645 | -5.444929815 |
| 1422565_s_at | -0.164004136 | 5.023805175 | -0.628978267 | 0.544337332 | 0.544337332 | -5.444949901 |
| 1416229_at   | -0.052606386 | 8.978364517 | -0.628940543 | 0.544360988 | 0.544360988 | -5.444971807 |
| 1424748_at   | -0.039383844 | 8.613207259 | -0.628936195 | 0.544363715 | 0.544363715 | -5.444974332 |
| 1448504_a_at | 0.048508766  | 11.62461576 | 0.6289112    | 0.544379389 | 0.544379389 | -5.444988846 |
| 1458968_at   | 0.065024649  | 5.845629879 | 0.628883866  | 0.54439653  | 0.54439653  | -5.445004718 |
| 1444346_at   | -0.047613042 | 4.297459084 | -0.628854584 | 0.544414894 | 0.544414894 | -5.445021721 |
| 1455436_at   | 0.172606098  | 6.618668608 | 0.628852059  | 0.544416478 | 0.544416478 | -5.445023187 |
| 1433591_at   | -0.041769038 | 9.703552844 | -0.628839032 | 0.544424647 | 0.544424647 | -5.44503075  |
| 1455404_at   | -0.065435708 | 6.28305028  | -0.628812177 | 0.544441489 | 0.544441489 | -5.445046342 |
| 1420487_at   | 0.12188188   | 5.228798484 | 0.628792756  | 0.544453669 | 0.544453669 | -5.445057618 |
| 1448091_at   | -0.053552557 | 3.566987386 | -0.628785564 | 0.544458179 | 0.544458179 | -5.445061793 |
| 1439883_at   | -0.051571287 | 5.015684324 | -0.628755248 | 0.544477192 | 0.544477192 | -5.445079393 |
| 1425176_at   | -0.059698015 | 5.978524203 | -0.628754043 | 0.544477948 | 0.544477948 | -5.445080093 |
| 1442847_at   | -0.043725301 | 3.420235939 | -0.628665058 | 0.544533758 | 0.544533758 | -5.445131748 |
| 1459697_at   | -0.047117653 | 3.923721188 | -0.628602348 | 0.544573091 | 0.544573091 | -5.445168148 |
| 1437040_at   | -0.062404228 | 4.847657016 | -0.628530944 | 0.544617879 | 0.544617879 | -5.44520959  |
| 1423916_s_at | -0.058310956 | 10.66020975 | -0.628462757 | 0.544660652 | 0.544660652 | -5.445249161 |
| 1434215_at   | 0.040649247  | 9.225192165 | 0.628437674  | 0.544676386 | 0.544676386 | -5.445263716 |
| 1437015_x_at | 0.045546564  | 3.558356282 | 0.628414958  | 0.544690636 | 0.544690636 | -5.445276897 |
| 1446518_at   | 0.120563752  | 5.81851333  | 0.628337303  | 0.544739351 | 0.544739351 | -5.445321954 |
| 1416870_at   | -0.05132898  | 7.587494452 | -0.62830699  | 0.544758368 | 0.544758368 | -5.445339541 |
| 1433786_x_at | -0.044112746 | 12.53875863 | -0.62830454  | 0.544759905 | 0.544759905 | -5.445340962 |
| 1432806_at   | 0.054747093  | 4.616432609 | 0.628263833  | 0.544785443 | 0.544785443 | -5.445364579 |
| 1457660_x_at | -0.046768788 | 3.269046048 | -0.628243713 | 0.544798066 | 0.544798066 | -5.445376251 |
| 1441142_at   | -0.044850295 | 3.800528175 | -0.628240386 | 0.544800153 | 0.544800153 | -5.445378181 |
| 1433605_at   | -0.059491628 | 8.582621624 | -0.628194276 | 0.544829082 | 0.544829082 | -5.445404928 |
| 1452222_at   | -0.041418612 | 9.99532697  | -0.628185116 | 0.544834829 | 0.544834829 | -5.445410242 |
| 1448856_a_at | 0.044339217  | 6.991007238 | 0.628165895  | 0.544846888 | 0.544846888 | -5.445421391 |
| 1429620_at   | -0.039362251 | 4.614978992 | -0.628121124 | 0.544874979 | 0.544874979 | -5.44544736  |
| 1448724_at   | 0.047322113  | 7.490365104 | 0.628054866  | 0.544916552 | 0.544916552 | -5.445485788 |
| 1419688_at   | 0.054204988  | 9.406135284 | 0.628034544  | 0.544929304 | 0.544929304 | -5.445497574 |
| 1458344_at   | -0.072619385 | 3.752371146 | -0.62788993  | 0.54502005  | 0.54502005  | -5.445581432 |
| 1448440_x_at | -0.041248008 | 7.526097282 | -0.627872685 | 0.545030871 | 0.545030871 | -5.44559143  |
| 1446664_at   | -0.058214256 | 3.606239687 | -0.627842064 | 0.545050087 | 0.545050087 | -5.445609184 |
| 1425450_at   | 0.052158008  | 3.932288527 | 0.627832077  | 0.545056354 | 0.545056354 | -5.445614974 |
| 1444603_at   | 0.049411528  | 3.220378628 | 0.627807716  | 0.545071643 | 0.545071643 | -5.445629098 |
| 1423908_at   | 0.039025574  | 9.301699669 | 0.627786603  | 0.545084893 | 0.545084893 | -5.445641338 |
| 1434680_at   | 0.058456823  | 6.705441171 | 0.627757989  | 0.54510285  | 0.54510285  | -5.445657926 |
| 1458080_at   | 0.062361317  | 3.491174366 | 0.62775574   | 0.545104261 | 0.545104261 | -5.445659229 |
| 1442706_at   | 0.061642774  | 4.370027835 | 0.627725045  | 0.545123525 | 0.545123525 | -5.445677023 |

|                |              |             |              |             |             |              |
|----------------|--------------|-------------|--------------|-------------|-------------|--------------|
| 1420164_at     | 0.050691299  | 3.971733617 | 0.627682435  | 0.545150268 | 0.545150268 | -5.445701722 |
| 1440560_at     | 0.057725881  | 5.225465112 | 0.627666584  | 0.545160216 | 0.545160216 | -5.44571091  |
| 1436651_at     | -0.050280194 | 8.412009598 | -0.627629469 | 0.545183511 | 0.545183511 | -5.445732423 |
| 1419259_at     | 0.048029528  | 10.33011384 | 0.627593404  | 0.545206147 | 0.545206147 | -5.445753325 |
| 1460206_at     | -0.056209859 | 7.799541079 | -0.627562307 | 0.545225665 | 0.545225665 | -5.445771347 |
| 1432139_at     | -0.037907696 | 3.137829519 | -0.627561454 | 0.5452262   | 0.5452262   | -5.445771842 |
| 1433296_at     | -0.053136126 | 3.83217225  | -0.627557732 | 0.545228537 | 0.545228537 | -5.445773999 |
| 1458324_x_at   | 0.083766002  | 4.278742153 | 0.627510994  | 0.545257873 | 0.545257873 | -5.445801084 |
| 1431425_a_at   | -0.044164226 | 4.452753873 | -0.627382084 | 0.545338792 | 0.545338792 | -5.44587578  |
| 1416350_at     | -0.052091704 | 6.334827118 | -0.627357993 | 0.545353915 | 0.545353915 | -5.445889738 |
| 1434272_at     | 0.098958986  | 6.345592373 | 0.627357868  | 0.545353994 | 0.545353994 | -5.44588981  |
| 1447363_s_at   | 0.055699481  | 8.988418299 | 0.62722705   | 0.545436119 | 0.545436119 | -5.445965595 |
| 1426175_a_at   | -0.068646433 | 4.20724487  | -0.627123248 | 0.545501289 | 0.545501289 | -5.446025719 |
| 1455772_at     | 0.058428462  | 3.856749409 | 0.627061443  | 0.545540094 | 0.545540094 | -5.446061513 |
| 1444516_at     | 0.071619391  | 5.951450415 | 0.62704213   | 0.545552221 | 0.545552221 | -5.446072697 |
| 1436843_at     | 0.084429591  | 5.968929096 | 0.627022831  | 0.545564338 | 0.545564338 | -5.446083873 |
| 1452324_at     | -0.046874522 | 7.186475667 | -0.627017385 | 0.545567757 | 0.545567757 | -5.446087027 |
| 1434892_x_at   | 0.039654408  | 12.22124185 | 0.626921791  | 0.545627782 | 0.545627782 | -5.44614238  |
| 1456039_at     | -0.05631145  | 8.32794817  | -0.626901406 | 0.545640583 | 0.545640583 | -5.446154183 |
| AFFX-MUR_b2_at | 0.060586757  | 9.125884052 | 0.626878749  | 0.54565481  | 0.54565481  | -5.446167301 |
| 1443940_at     | 0.050222102  | 3.150145672 | 0.626861103  | 0.545665892 | 0.545665892 | -5.446177517 |
| 1446275_at     | 0.054785779  | 3.680866368 | 0.626843157  | 0.545677161 | 0.545677161 | -5.446187907 |
| 1433250_at     | -0.064076126 | 3.966173797 | -0.626829843 | 0.545685521 | 0.545685521 | -5.446195614 |
| 1440977_at     | 0.083701344  | 7.745992951 | 0.626771567  | 0.545722118 | 0.545722118 | -5.44622935  |
| 1456184_at     | 0.045056697  | 4.266349732 | 0.626768649  | 0.545723951 | 0.545723951 | -5.44623104  |
| 1452052_s_at   | 0.042080949  | 10.57528141 | 0.626726082  | 0.545750683 | 0.545750683 | -5.44625568  |
| 1424935_at     | -0.057792503 | 4.191995751 | -0.626688026 | 0.545774583 | 0.545774583 | -5.446277707 |
| 1435749_at     | -0.06102683  | 4.811418521 | -0.626666506 | 0.545788099 | 0.545788099 | -5.446290163 |
| 1436950_at     | 0.055210222  | 10.30988966 | 0.626666122  | 0.54578834  | 0.54578834  | -5.446290385 |
| 1433343_at     | 0.041663463  | 3.485244223 | 0.626633112  | 0.545809072 | 0.545809072 | -5.446309491 |
| 1423297_at     | -0.040166536 | 7.818941587 | -0.6266319   | 0.545809833 | 0.545809833 | -5.446310192 |
| 1430173_x_at   | 0.045748046  | 5.553831112 | 0.626573711  | 0.54584638  | 0.54584638  | -5.446343868 |
| 1445346_at     | 0.051477016  | 4.081031253 | 0.62655206   | 0.545859978 | 0.545859978 | -5.446356398 |
| 1430065_at     | -0.054421934 | 3.766343069 | -0.626546954 | 0.545863185 | 0.545863185 | -5.446359352 |
| 1452441_at     | 0.055834909  | 6.256831607 | 0.626526496  | 0.545876035 | 0.545876035 | -5.446371191 |
| 1435423_x_at   | 0.043526426  | 8.811423251 | 0.62650514   | 0.545889449 | 0.545889449 | -5.446383549 |
| 1453949_s_at   | 0.047234621  | 8.822176672 | 0.626504966  | 0.545889558 | 0.545889558 | -5.446383649 |
| 1440340_at     | -0.073825783 | 4.742843981 | -0.626466261 | 0.545913869 | 0.545913869 | -5.446406045 |
| 1420655_at     | 0.044706628  | 5.386729501 | 0.626395511  | 0.54595831  | 0.54595831  | -5.446446981 |
| 1456780_at     | 0.094976996  | 6.34327333  | 0.626380748  | 0.545967584 | 0.545967584 | -5.446455522 |
| 1419411_at     | 0.061725397  | 3.631851653 | 0.626335378  | 0.545996084 | 0.545996084 | -5.44648177  |
| 1450573_at     | -0.050901369 | 5.429771866 | -0.626269164 | 0.546037679 | 0.546037679 | -5.446520073 |
| 1449833_at     | -0.056372876 | 3.492243292 | -0.626152794 | 0.546110787 | 0.546110787 | -5.446587382 |
| 1457271_at     | 0.051867543  | 3.72792295  | 0.62607825   | 0.54615762  | 0.54615762  | -5.446630493 |
| 1451408_at     | 0.07613172   | 7.65704794  | 0.62603357   | 0.546185693 | 0.546185693 | -5.44665633  |
| 1451785_at     | 0.043727702  | 3.441376452 | 0.62591618   | 0.546259452 | 0.546259452 | -5.446724206 |
| 1445543_at     | 0.051195736  | 8.162101363 | 0.625839278  | 0.546307776 | 0.546307776 | -5.446768665 |
| 1446670_at     | -0.063011392 | 6.433128298 | -0.625740523 | 0.546369834 | 0.546369834 | -5.44682575  |
| 1453806_at     | -0.046723578 | 6.095106113 | -0.62572696  | 0.546378358 | 0.546378358 | -5.44683359  |
| 1415985_at     | -0.050379542 | 10.68237596 | -0.625719642 | 0.546382957 | 0.546382957 | -5.44683782  |
| 1427483_at     | 0.052487371  | 8.017995354 | 0.625621483  | 0.546444646 | 0.546444646 | -5.446894551 |
| 1454299_at     | 0.080206536  | 6.420951301 | 0.625559804  | 0.546483411 | 0.546483411 | -5.446930194 |
| 1419936_at     | 0.079683744  | 3.552492265 | 0.625542935  | 0.546494013 | 0.546494013 | -5.446939942 |

|              |              |             |              |             |             |              |
|--------------|--------------|-------------|--------------|-------------|-------------|--------------|
| 1444336_at   | 0.039497114  | 3.528690893 | 0.625503564  | 0.546518758 | 0.546518758 | -5.446962692 |
| 1444808_at   | -0.048051171 | 4.888977958 | -0.625472662 | 0.546538181 | 0.546538181 | -5.446980546 |
| 1447816_x_at | -0.056034248 | 8.368431092 | -0.62545219  | 0.546551049 | 0.546551049 | -5.446992375 |
| 1427997_at   | 0.064173857  | 9.219457296 | 0.625401665  | 0.546582807 | 0.546582807 | -5.447021565 |
| 1419396_at   | -0.052283415 | 7.288877476 | -0.625394557 | 0.546587274 | 0.546587274 | -5.447025672 |
| 1453367_a_at | -0.049917595 | 8.332391637 | -0.625389907 | 0.546590198 | 0.546590198 | -5.447028359 |
| 1448681_at   | -0.048485252 | 4.467184574 | -0.625332709 | 0.546626151 | 0.546626151 | -5.447061401 |
| 1426711_at   | -0.047840792 | 7.223732058 | -0.625274928 | 0.546662473 | 0.546662473 | -5.447094778 |
| 1444168_at   | -0.06106352  | 5.361301235 | -0.625271921 | 0.546664363 | 0.546664363 | -5.447096515 |
| 1452594_at   | -0.059728284 | 8.086812647 | -0.625251497 | 0.546677202 | 0.546677202 | -5.447108312 |
| 1442593_at   | -0.059514377 | 5.250187755 | -0.625216663 | 0.546699101 | 0.546699101 | -5.447128432 |
| 1432883_at   | 0.038802184  | 3.463792848 | 0.625165089  | 0.546731523 | 0.546731523 | -5.447158218 |
| 1452984_at   | 0.05605339   | 7.686186336 | 0.625162139  | 0.546733378 | 0.546733378 | -5.447159921 |
| 1421055_at   | 0.047175408  | 8.745606259 | 0.6251569    | 0.546736671 | 0.546736671 | -5.447162947 |
| 1428412_at   | 0.042851006  | 9.093956073 | 0.625141355  | 0.546746444 | 0.546746444 | -5.447171925 |
| 1452498_at   | -0.061767048 | 3.780450901 | -0.625098467 | 0.546773407 | 0.546773407 | -5.447196692 |
| 1418764_a_at | -0.040308697 | 6.920526661 | -0.625087538 | 0.546780278 | 0.546780278 | -5.447203003 |
| 1447703_x_at | 0.099167793  | 6.989396549 | 0.625037263  | 0.546811887 | 0.546811887 | -5.447232034 |
| 1435346_at   | 0.0441101    | 7.264281028 | 0.624988051  | 0.546842828 | 0.546842828 | -5.447260449 |
| 1423416_at   | 0.04969868   | 10.77009171 | 0.624973451  | 0.546852008 | 0.546852008 | -5.447268879 |
| 1457120_at   | 0.04430482   | 3.174812157 | 0.62485558   | 0.546926122 | 0.546926122 | -5.447336927 |
| 1437208_at   | 0.055102009  | 7.216883066 | 0.624829131  | 0.546942753 | 0.546942753 | -5.447352195 |
| 1425025_at   | -0.058740259 | 6.254927446 | -0.624819801 | 0.54694862  | 0.54694862  | -5.447357581 |
| 1418458_at   | -0.042428146 | 9.503219816 | -0.624662773 | 0.547047367 | 0.547047367 | -5.447448213 |
| 1435433_at   | 0.059847206  | 7.220654306 | 0.624626805  | 0.547069987 | 0.547069987 | -5.44746897  |
| 1428936_at   | 0.089481339  | 7.7836383   | 0.624584408  | 0.54709665  | 0.54709665  | -5.447493435 |
| 1449601_x_at | -0.058952671 | 4.594842094 | -0.624584134 | 0.547096822 | 0.547096822 | -5.447493593 |
| 1450572_at   | 0.067519106  | 4.193975228 | 0.624559126  | 0.54711255  | 0.54711255  | -5.447508023 |
| 1440902_at   | 0.03901176   | 3.275789424 | 0.624521564  | 0.547136174 | 0.547136174 | -5.447529696 |
| 1429223_a_at | -0.155635697 | 4.317195757 | -0.624455242 | 0.547177888 | 0.547177888 | -5.447567962 |
| 1419317_x_at | 0.049165262  | 7.322995255 | 0.624369654  | 0.547231721 | 0.547231721 | -5.447617336 |
| 1426072_at   | 0.075600231  | 3.976763496 | 0.624332742  | 0.547254939 | 0.547254939 | -5.447638629 |
| 1458491_at   | 0.041298307  | 6.26241538  | 0.624303835  | 0.547273122 | 0.547273122 | -5.447655303 |
| 1437816_at   | -0.046015626 | 4.296632722 | -0.624303443 | 0.547273369 | 0.547273369 | -5.447655529 |
| 1448851_a_at | 0.066599605  | 8.338016688 | 0.624292243  | 0.547280414 | 0.547280414 | -5.447661989 |
| 1446935_at   | -0.040918771 | 3.854342148 | -0.624266835 | 0.547296396 | 0.547296396 | -5.447676644 |
| 1448604_at   | -0.051329365 | 8.292865922 | -0.624241816 | 0.547312135 | 0.547312135 | -5.447691074 |
| 1425538_x_at | 0.101275425  | 5.111433828 | 0.624234718  | 0.547316599 | 0.547316599 | -5.447695168 |
| 1454208_at   | 0.057014233  | 3.816701419 | 0.624226162  | 0.547321982 | 0.547321982 | -5.447700102 |
| 1454348_at   | -0.0482289   | 4.602983269 | -0.624216535 | 0.547328038 | 0.547328038 | -5.447705654 |
| 1449690_x_at | 0.058693562  | 3.594853474 | 0.624206452  | 0.547334381 | 0.547334381 | -5.44771147  |
| 1425491_at   | 0.048661851  | 8.557433241 | 0.624184155  | 0.547348407 | 0.547348407 | -5.447724329 |
| 1430637_at   | 0.043507435  | 3.243243957 | 0.624173244  | 0.547355271 | 0.547355271 | -5.447730621 |
| 1417351_a_at | 0.057532243  | 10.13044478 | 0.624164832  | 0.547360563 | 0.547360563 | -5.447735472 |
| 1416015_s_at | 0.038874587  | 10.30720196 | 0.624130158  | 0.547382376 | 0.547382376 | -5.447755467 |
| 1442566_at   | -0.044051779 | 3.324765357 | -0.62410613  | 0.547397492 | 0.547397492 | -5.447769323 |
| 1423775_s_at | -0.045884156 | 9.066620807 | -0.624092595 | 0.547406008 | 0.547406008 | -5.447777128 |
| 1432688_at   | -0.053366442 | 3.603493256 | -0.624069988 | 0.54742023  | 0.54742023  | -5.447790164 |
| 1444091_a_at | 0.048528473  | 3.506902936 | 0.624054647  | 0.547429881 | 0.547429881 | -5.447799009 |
| 1446543_at   | -0.07808536  | 5.993326292 | -0.62405316  | 0.547430817 | 0.547430817 | -5.447799867 |
| 1446924_at   | 0.083913554  | 3.729802479 | 0.623999161  | 0.54746479  | 0.54746479  | -5.447831001 |
| 1423900_at   | -0.046631479 | 8.396432328 | -0.62399532  | 0.547467207 | 0.547467207 | -5.447833215 |
| 1459068_at   | -0.079037925 | 4.069084377 | -0.6239596   | 0.547489681 | 0.547489681 | -5.447853809 |

|              |              |             |              |             |             |              |
|--------------|--------------|-------------|--------------|-------------|-------------|--------------|
| 1431386_s_at | -0.050940739 | 6.210362552 | -0.623957813 | 0.547490805 | 0.547490805 | -5.447854839 |
| 1441764_at   | 0.050716145  | 3.809290459 | 0.623955575  | 0.547492103 | 0.547492103 | -5.447856028 |
| 1425238_at   | 0.055559291  | 6.83449115  | 0.623892629  | 0.547531818 | 0.547531818 | -5.447892417 |
| 1416724_x_at | -0.073756982 | 10.00027861 | -0.623841352 | 0.547564082 | 0.547564082 | -5.447921974 |
| 1442867_at   | -0.069974447 | 4.069491388 | -0.623829101 | 0.547571791 | 0.547571791 | -5.447929036 |
| 1454808_at   | -0.04161671  | 9.728043112 | -0.623819304 | 0.547577955 | 0.547577955 | -5.447934683 |
| 1421256_at   | -0.051173477 | 3.269056443 | -0.623790801 | 0.547595891 | 0.547595891 | -5.447951112 |
| 1453207_at   | 0.051213103  | 8.856698586 | 0.623753524  | 0.547619347 | 0.547619347 | -5.447972596 |
| 1420178_at   | 0.058582183  | 5.149454894 | 0.623743438  | 0.547625693 | 0.547625693 | -5.447978409 |
| 1440141_at   | 0.052137592  | 5.115190461 | 0.623741497  | 0.547626915 | 0.547626915 | -5.447979528 |
| 1447884_x_at | 0.062947605  | 3.73402432  | 0.623731195  | 0.547633398 | 0.547633398 | -5.447985465 |
| 1450722_at   | -0.044047872 | 8.319457551 | -0.623650568 | 0.547684135 | 0.547684135 | -5.448031929 |
| 1417731_at   | -0.042941143 | 8.830500454 | -0.623644385 | 0.547688026 | 0.547688026 | -5.448035493 |
| 1429200_at   | 0.075825139  | 6.572822842 | 0.623627791  | 0.547698469 | 0.547698469 | -5.448045055 |
| 1435988_x_at | 0.04125662   | 10.26531814 | 0.623579734  | 0.547728712 | 0.547728712 | -5.448072746 |
| 1416278_a_at | -0.038921027 | 11.62159651 | -0.623572839 | 0.547733051 | 0.547733051 | -5.448076718 |
| 1441261_at   | -0.06292139  | 4.997658956 | -0.623516901 | 0.547768255 | 0.547768255 | -5.448108948 |
| 1438271_at   | 0.056968865  | 8.660516532 | 0.623446857  | 0.547812339 | 0.547812339 | -5.448149301 |
| 1446777_at   | 0.058420614  | 3.695228601 | 0.623414782  | 0.547832527 | 0.547832527 | -5.448167778 |
| 1445308_at   | -0.059777994 | 4.055527623 | -0.623406679 | 0.547837627 | 0.547837627 | -5.448172446 |
| 1442650_at   | 0.057571164  | 4.893349919 | 0.623377584  | 0.54785594  | 0.54785594  | -5.448189206 |
| 1449826_a_at | 0.086794764  | 3.91722383  | 0.623356878  | 0.547868973 | 0.547868973 | -5.448201133 |
| 1451168_a_at | -0.089532616 | 10.70195623 | -0.623346317 | 0.54787562  | 0.54787562  | -5.448207216 |
| 1449428_at   | -0.057326343 | 3.63604324  | -0.623308429 | 0.547899468 | 0.547899468 | -5.448229039 |
| 1432378_at   | -0.04062946  | 3.859771865 | -0.623261876 | 0.547928771 | 0.547928771 | -5.448255851 |
| 1446597_at   | 0.055716129  | 3.481002529 | 0.623256035  | 0.547932448 | 0.547932448 | -5.448259215 |
| 1436334_at   | 0.060886076  | 8.008869259 | 0.623164073  | 0.547990336 | 0.547990336 | -5.448312174 |
| 1440079_at   | 0.042277234  | 3.13275774  | 0.623125712  | 0.548014485 | 0.548014485 | -5.448334263 |
| 1460636_at   | -0.050497486 | 7.91411357  | -0.623104909 | 0.548027581 | 0.548027581 | -5.448346242 |
| 1454794_at   | 0.05858726   | 9.352243322 | 0.623065149  | 0.548052612 | 0.548052612 | -5.448369135 |
| 1438223_at   | 0.049801978  | 5.882911771 | 0.623031943  | 0.548073516 | 0.548073516 | -5.448388253 |
| 1449041_a_at | 0.041473495  | 9.987776453 | 0.623020603  | 0.548080656 | 0.548080656 | -5.448394782 |
| 1436757_a_at | 0.047385143  | 12.2631978  | 0.622888771  | 0.548163656 | 0.548163656 | -5.448470673 |
| 1422610_s_at | 0.042824124  | 9.563624583 | 0.622831378  | 0.548199793 | 0.548199793 | -5.448503708 |
| 1428731_at   | -0.038951776 | 7.887240202 | -0.622829615 | 0.548200902 | 0.548200902 | -5.448504722 |
| 1443480_at   | 0.042832037  | 5.32248217  | 0.622827201  | 0.548202422 | 0.548202422 | -5.448506112 |
| 1456237_x_at | -0.046783679 | 3.572674831 | -0.622821967 | 0.548205718 | 0.548205718 | -5.448509125 |
| 1417981_at   | -0.060289866 | 8.551210832 | -0.6227905   | 0.548225531 | 0.548225531 | -5.448527235 |
| 1459322_at   | -0.058647832 | 4.673555774 | -0.622760274 | 0.548244564 | 0.548244564 | -5.448544631 |
| 1453063_at   | 0.06022557   | 7.406349212 | 0.622742404  | 0.548255816 | 0.548255816 | -5.448554915 |
| 1445372_at   | -0.062660438 | 4.429353983 | -0.622721416 | 0.548269032 | 0.548269032 | -5.448566993 |
| 1442091_at   | -0.055939818 | 3.693211189 | -0.622703174 | 0.548280518 | 0.548280518 | -5.44857749  |
| 1439927_at   | 0.058706716  | 6.930435373 | 0.622677875  | 0.548296449 | 0.548296449 | -5.448592049 |
| 1425913_a_at | -0.042440814 | 10.30704993 | -0.622644981 | 0.548317163 | 0.548317163 | -5.448610977 |
| 1420376_a_at | 0.044226135  | 12.27546176 | 0.62256707   | 0.548366226 | 0.548366226 | -5.448655804 |
| 1433611_s_at | -0.048148326 | 10.56929196 | -0.622535506 | 0.548386105 | 0.548386105 | -5.448673965 |
| 1446882_at   | 0.083228657  | 5.537863392 | 0.622522317  | 0.54839441  | 0.54839441  | -5.448681552 |
| 1447296_at   | -0.04893321  | 4.214627646 | -0.622488984 | 0.548415403 | 0.548415403 | -5.448700728 |
| 1418047_at   | 0.045560436  | 3.137758504 | 0.622488222  | 0.548415883 | 0.548415883 | -5.448701167 |
| 1426803_at   | 0.047099942  | 9.805170615 | 0.622422649  | 0.548457181 | 0.548457181 | -5.448738887 |
| 1431847_at   | 0.053819806  | 4.085279172 | 0.622408832  | 0.548465883 | 0.548465883 | -5.448746835 |
| 1446606_at   | -0.039737202 | 4.240806213 | -0.622393887 | 0.548475296 | 0.548475296 | -5.448755432 |
| 1440564_at   | 0.10303424   | 4.098610388 | 0.622392144  | 0.548476393 | 0.548476393 | -5.448756434 |



|              |              |             |              |             |             |              |
|--------------|--------------|-------------|--------------|-------------|-------------|--------------|
| 1451254_at   | 0.047251093  | 10.68912086 | 0.62237978   | 0.54848418  | 0.54848418  | -5.448763546 |
| 1445145_at   | 0.068485778  | 3.899996457 | 0.622367227  | 0.548492086 | 0.548492086 | -5.448770766 |
| 1419287_at   | -0.061070986 | 9.811660603 | -0.622322513 | 0.548520249 | 0.548520249 | -5.448796483 |
| 1437271_at   | 0.074444592  | 7.109093294 | 0.622285652  | 0.548543467 | 0.548543467 | -5.448817682 |
| 1441936_x_at | 0.039429806  | 3.158804148 | 0.622251127  | 0.548565214 | 0.548565214 | -5.448837538 |
| 1428320_at   | -0.053251535 | 8.822731871 | -0.622235094 | 0.548575313 | 0.548575313 | -5.448846758 |
| 1420336_at   | -0.057776173 | 5.570961371 | -0.622214507 | 0.54858828  | 0.54858828  | -5.448858596 |
| 1446334_at   | -0.04694055  | 3.792603822 | -0.622160278 | 0.54862244  | 0.54862244  | -5.44888978  |
| 1436906_at   | 0.044839044  | 8.644536681 | 0.622109766  | 0.548654258 | 0.548654258 | -5.448918822 |
| 1432885_at   | -0.070765491 | 3.891037084 | -0.622071914 | 0.548678104 | 0.548678104 | -5.448940585 |
| 1437177_at   | 0.059119017  | 7.907488509 | 0.622059905  | 0.548685669 | 0.548685669 | -5.448947489 |
| 1443038_at   | 0.066954985  | 5.828657457 | 0.62205623   | 0.548687984 | 0.548687984 | -5.448949602 |
| 1450612_a_at | -0.064656345 | 5.407546787 | -0.621962915 | 0.548746771 | 0.548746771 | -5.449003246 |
| 1423105_a_at | 0.04335121   | 9.594363372 | 0.621955039  | 0.548751733 | 0.548751733 | -5.449007774 |
| 1416331_a_at | -0.056398349 | 9.00051846  | -0.621903445 | 0.548784238 | 0.548784238 | -5.44903743  |
| 1419183_at   | -0.041135766 | 9.613302904 | -0.621853928 | 0.548815436 | 0.548815436 | -5.449065891 |
| 1460060_at   | -0.053626053 | 3.141851549 | -0.621841859 | 0.54882304  | 0.54882304  | -5.449072827 |
| 1445509_at   | 0.041884104  | 4.344039171 | 0.621793686  | 0.548853392 | 0.548853392 | -5.449100513 |
| 1423203_a_at | 0.043221287  | 3.606086922 | 0.621776019  | 0.548864524 | 0.548864524 | -5.449110666 |
| 1453580_at   | -0.041899066 | 5.083327565 | -0.621737927 | 0.548888525 | 0.548888525 | -5.449132556 |
| 1440855_at   | 0.060848357  | 5.089898092 | 0.62173195   | 0.548892291 | 0.548892291 | -5.44913599  |
| 1458194_at   | 0.047934169  | 3.766653843 | 0.621688537  | 0.548919646 | 0.548919646 | -5.449160936 |
| 1447426_at   | 0.067237091  | 6.007941775 | 0.621685233  | 0.548921728 | 0.548921728 | -5.449162835 |
| 1432711_at   | 0.04851333   | 3.630938036 | 0.621681293  | 0.548924211 | 0.548924211 | -5.449165099 |
| 1427283_at   | -0.085962465 | 8.515136534 | -0.621676088 | 0.54892749  | 0.54892749  | -5.449168089 |
| 1452370_s_at | 0.056905938  | 6.669723322 | 0.621666284  | 0.548933668 | 0.548933668 | -5.449173723 |
| 1459588_at   | -0.057587989 | 4.405991272 | -0.621621047 | 0.548962174 | 0.548962174 | -5.449199714 |
| 1433487_at   | -0.043249953 | 6.21965119  | -0.621586789 | 0.548983762 | 0.548983762 | -5.449219397 |
| 1459449_at   | 0.088933594  | 3.956162536 | 0.62157544   | 0.548990913 | 0.548990913 | -5.449225917 |
| 1446146_at   | 0.146838427  | 6.438909869 | 0.621530764  | 0.549019067 | 0.549019067 | -5.449251582 |
| 1460541_at   | -0.050716194 | 8.558956795 | -0.621503084 | 0.54903651  | 0.54903651  | -5.449267483 |
| 1457375_at   | 0.044021533  | 7.653283072 | 0.621323051  | 0.549149973 | 0.549149973 | -5.449370889 |
| 1447134_at   | -0.053745773 | 3.538077874 | -0.621295238 | 0.549167504 | 0.549167504 | -5.449386862 |
| 1445208_at   | -0.053258794 | 4.631505832 | -0.621191092 | 0.549233147 | 0.549233147 | -5.449446665 |
| 1422338_at   | -0.048063097 | 4.510810259 | -0.621147115 | 0.549260867 | 0.549260867 | -5.449471915 |
| 1453509_at   | -0.112780642 | 7.749608927 | -0.621060482 | 0.549315478 | 0.549315478 | -5.449521652 |
| 1428202_at   | -0.047508969 | 7.82885943  | -0.621042358 | 0.549326903 | 0.549326903 | -5.449532056 |
| 1433269_at   | 0.04229928   | 4.029534822 | 0.621041643  | 0.549327353 | 0.549327353 | -5.449532467 |
| 1449836_x_at | -0.054560764 | 5.45999855  | -0.621026722 | 0.549336759 | 0.549336759 | -5.449541032 |
| 1459454_at   | 0.042616889  | 5.345477908 | 0.620947781  | 0.549386525 | 0.549386525 | -5.449586345 |
| 1449659_s_at | 0.045701645  | 7.506698632 | 0.620947654  | 0.549386605 | 0.549386605 | -5.449586418 |
| 1453085_at   | -0.064042315 | 3.527843413 | -0.620912764 | 0.549408601 | 0.549408601 | -5.449606444 |
| 1425706_a_at | 0.039388666  | 7.772493278 | 0.62090195   | 0.549415418 | 0.549415418 | -5.449612651 |
| 1425492_at   | 0.040508529  | 10.64139444 | 0.620875325  | 0.549432204 | 0.549432204 | -5.449627931 |
| 1417345_at   | 0.044989649  | 4.776242157 | 0.620874905  | 0.549432469 | 0.549432469 | -5.449628172 |
| 1421391_at   | -0.04718196  | 5.585566914 | -0.620873598 | 0.549433293 | 0.549433293 | -5.449628922 |
| 1455227_at   | -0.055766273 | 5.084820421 | -0.620820879 | 0.54946653  | 0.54946653  | -5.449659177 |
| 1440538_at   | 0.041561125  | 3.32344433  | 0.620820816  | 0.54946657  | 0.54946657  | -5.449659214 |
| 1435044_at   | -0.075230499 | 7.084008944 | -0.620811292 | 0.549472575 | 0.549472575 | -5.449664679 |
| 1440941_at   | -0.045203137 | 6.210956947 | -0.620740833 | 0.549516999 | 0.549516999 | -5.449705111 |
| 1424546_at   | -0.053487747 | 5.047869489 | -0.62072759  | 0.549525349 | 0.549525349 | -5.44971271  |
| 1459405_at   | 0.090348753  | 5.969484053 | 0.620720354  | 0.549529912 | 0.549529912 | -5.449716862 |
| 1429455_at   | 0.093965061  | 8.529030697 | 0.620708886  | 0.549537143 | 0.549537143 | -5.449723442 |

|              |              |             |              |             |             |              |
|--------------|--------------|-------------|--------------|-------------|-------------|--------------|
| 1451923_at   | 0.056693621  | 4.352597018 | 0.620694649  | 0.549546119 | 0.549546119 | -5.449731611 |
| 1438968_x_at | -0.061784747 | 9.628276391 | -0.620681959 | 0.549554121 | 0.549554121 | -5.449738892 |
| 1427901_at   | -0.040133136 | 9.682602438 | -0.620673615 | 0.549559382 | 0.549559382 | -5.449743679 |
| 1457231_at   | 0.140649583  | 6.478995887 | 0.620642679  | 0.549578889 | 0.549578889 | -5.449761428 |
| 1425532_a_at | -0.072388725 | 8.586100325 | -0.620573923 | 0.549622244 | 0.549622244 | -5.449800873 |
| 1434054_at   | -0.053573123 | 7.758964981 | -0.620439099 | 0.549707266 | 0.549707266 | -5.449878209 |
| 1422420_at   | -0.062600257 | 4.994792512 | -0.620405646 | 0.549728363 | 0.549728363 | -5.449897395 |
| 1448995_at   | -0.116220968 | 8.507858431 | -0.620355068 | 0.54976026  | 0.54976026  | -5.449926402 |
| 1418371_at   | 0.057206772  | 9.184727683 | 0.620279847  | 0.549807701 | 0.549807701 | -5.449969537 |
| 1452582_at   | -0.038824324 | 7.829156113 | -0.620249555 | 0.549826806 | 0.549826806 | -5.449986906 |
| 1455209_at   | -0.049978747 | 3.162326788 | -0.620240888 | 0.549832273 | 0.549832273 | -5.449991876 |
| 1442142_at   | 0.069917628  | 5.724701374 | 0.620149093  | 0.549890172 | 0.549890172 | -5.450044506 |
| 1417422_at   | -0.088136045 | 4.433006365 | -0.620128724 | 0.54990302  | 0.54990302  | -5.450056184 |
| 1438796_at   | 0.049410041  | 6.033457989 | 0.620089273  | 0.549927905 | 0.549927905 | -5.4500788   |
| 1426759_at   | 0.043661663  | 10.21165554 | 0.620017935  | 0.549972905 | 0.549972905 | -5.450119693 |
| 1432066_at   | 0.045306775  | 3.557204761 | 0.61998804   | 0.549991763 | 0.549991763 | -5.450136828 |
| 1439788_at   | 0.04572894   | 6.516114125 | 0.619980971  | 0.549996222 | 0.549996222 | -5.45014088  |
| 1416642_a_at | 0.038573412  | 14.37223804 | 0.619972256  | 0.55000172  | 0.55000172  | -5.450145875 |
| 1435217_at   | 0.062191945  | 3.639013486 | 0.619958548  | 0.550010367 | 0.550010367 | -5.450153731 |
| 1427264_at   | -0.054373607 | 3.887453481 | -0.619934792 | 0.550025354 | 0.550025354 | -5.450167347 |
| 1426996_at   | 0.06789012   | 4.823291521 | 0.619863018  | 0.550070634 | 0.550070634 | -5.45020848  |
| 1426210_x_at | 0.066877874  | 3.980001331 | 0.619838298  | 0.550086229 | 0.550086229 | -5.450222646 |
| 1452305_s_at | 0.0449184    | 8.102198698 | 0.619795918  | 0.550112967 | 0.550112967 | -5.450246931 |
| 1425611_a_at | -0.041957808 | 6.947303943 | -0.619776347 | 0.550125314 | 0.550125314 | -5.450258145 |
| 1448421_s_at | -0.08271493  | 9.871189037 | -0.619768882 | 0.550130024 | 0.550130024 | -5.450262422 |
| 1423568_at   | 0.044654298  | 10.38679803 | 0.619733473  | 0.550152364 | 0.550152364 | -5.450282711 |
| 1436431_at   | -0.048880871 | 8.179169757 | -0.619731444 | 0.550153644 | 0.550153644 | -5.450283874 |
| 1420560_at   | 0.065788269  | 4.912854583 | 0.619714531  | 0.550164315 | 0.550164315 | -5.450293564 |
| 1426830_a_at | 0.044199871  | 10.80394299 | 0.619714423  | 0.550164383 | 0.550164383 | -5.450293625 |
| 1449196_a_at | 0.041007824  | 13.51297881 | 0.619701827  | 0.550172331 | 0.550172331 | -5.450300842 |
| 1437156_at   | -0.064258111 | 3.395057157 | -0.61934487  | 0.550397578 | 0.550397578 | -5.450505299 |
| 1424776_a_at | 0.051990758  | 8.223715145 | 0.619321947  | 0.550412044 | 0.550412044 | -5.450518426 |
| 1458862_at   | 0.059364934  | 6.871130472 | 0.619287481  | 0.550433796 | 0.550433796 | -5.450538161 |
| 1425925_at   | 0.051078715  | 4.028348767 | 0.619207959  | 0.550483985 | 0.550483985 | -5.450583691 |
| 1442590_at   | -0.062908858 | 7.299005371 | -0.619160054 | 0.550514221 | 0.550514221 | -5.450611116 |
| 1442167_at   | -0.045940493 | 3.855204113 | -0.619153877 | 0.550518119 | 0.550518119 | -5.450614652 |
| 1438489_at   | -0.049544244 | 6.716534378 | -0.619132908 | 0.550531355 | 0.550531355 | -5.450626656 |
| 1425032_at   | -0.05025559  | 3.259806469 | -0.619105037 | 0.550548947 | 0.550548947 | -5.45064261  |
| 1460522_at   | -0.052255729 | 4.05088564  | -0.619083103 | 0.550562791 | 0.550562791 | -5.450655166 |
| 1422882_at   | 0.096759048  | 7.040584509 | 0.619074982  | 0.550567917 | 0.550567917 | -5.450659814 |
| 1440382_at   | 0.043652529  | 3.511165324 | 0.618951806  | 0.55064567  | 0.55064567  | -5.450730314 |
| 1419600_at   | 0.04156149   | 3.296184497 | 0.618843969  | 0.550713745 | 0.550713745 | -5.450792024 |
| 1423220_at   | 0.044444502  | 9.364817715 | 0.618808325  | 0.550736248 | 0.550736248 | -5.450812419 |
| 1441164_at   | -0.057109388 | 5.054372055 | -0.618788828 | 0.550748556 | 0.550748556 | -5.450823574 |
| 1435521_at   | -0.144631989 | 5.20886719  | -0.618782796 | 0.550752365 | 0.550752365 | -5.450827026 |
| 1451834_at   | -0.065280509 | 4.553619588 | -0.618759894 | 0.550766824 | 0.550766824 | -5.450840129 |
| 1437193_s_at | 0.044361796  | 11.60591    | 0.618723677  | 0.550789689 | 0.550789689 | -5.45086085  |
| 1432115_a_at | -0.060658339 | 5.825959    | -0.618670522 | 0.550823249 | 0.550823249 | -5.450891258 |
| 1457737_at   | 0.050662552  | 4.576683047 | 0.618590072  | 0.550874044 | 0.550874044 | -5.450937278 |
| 1455442_at   | 0.073764677  | 4.912841026 | 0.618582683  | 0.55087871  | 0.55087871  | -5.450941505 |
| 1456905_at   | -0.071790988 | 7.077107771 | -0.618546991 | 0.550901246 | 0.550901246 | -5.450961919 |
| 1420822_s_at | -0.081252963 | 7.476272016 | -0.618531333 | 0.550911133 | 0.550911133 | -5.450970875 |
| 1459519_at   | -0.049039204 | 3.380580533 | -0.618490196 | 0.550937108 | 0.550937108 | -5.450994402 |

|              |              |             |              |             |             |              |
|--------------|--------------|-------------|--------------|-------------|-------------|--------------|
| 1455797_x_at | 0.045656888  | 8.395062001 | 0.618475461  | 0.550946413 | 0.550946413 | -5.451002829 |
| 1433938_at   | -0.040851106 | 7.952135951 | -0.618474107 | 0.550947268 | 0.550947268 | -5.451003603 |
| 1444638_at   | 0.218043068  | 5.788942603 | 0.618455082  | 0.550959282 | 0.550959282 | -5.451014484 |
| 1416931_at   | 0.039097272  | 8.039493528 | 0.618422764  | 0.550979689 | 0.550979689 | -5.451032965 |
| 1418714_at   | 0.066001284  | 5.334605833 | 0.618410256  | 0.550987588 | 0.550987588 | -5.451040118 |
| 1424416_at   | -0.045037163 | 8.657478886 | -0.618406087 | 0.550990221 | 0.550990221 | -5.451042502 |
| 1450115_at   | 0.056389666  | 6.311108443 | 0.618237284  | 0.551096823 | 0.551096823 | -5.451139018 |
| 1430182_a_at | 0.062430607  | 3.86080323  | 0.618148455  | 0.551152925 | 0.551152925 | -5.451189797 |
| 1424971_at   | 0.041417088  | 8.097109955 | 0.61807048   | 0.551202174 | 0.551202174 | -5.451234367 |
| 1421992_a_at | 0.086465288  | 10.99149548 | 0.618046783  | 0.551217142 | 0.551217142 | -5.451247911 |
| 1432093_at   | -0.052901376 | 3.989608224 | -0.618025471 | 0.551230604 | 0.551230604 | -5.451260091 |
| 1459619_at   | 0.07565107   | 8.264961263 | 0.617970976  | 0.551265025 | 0.551265025 | -5.451291234 |
| 1419367_at   | -0.054892703 | 8.827481734 | -0.61793805  | 0.551285824 | 0.551285824 | -5.45131005  |
| 1433052_at   | -0.042360769 | 4.655065818 | -0.617936006 | 0.551287115 | 0.551287115 | -5.451311218 |
| 1421847_at   | -0.047192002 | 8.837098888 | -0.617793658 | 0.551377037 | 0.551377037 | -5.451392553 |
| 1424645_at   | -0.037224424 | 9.095344699 | -0.617781037 | 0.55138501  | 0.55138501  | -5.451399764 |
| 1450531_at   | -0.054237805 | 4.472624617 | -0.617685736 | 0.551445218 | 0.551445218 | -5.451454206 |
| 1422333_at   | -0.047483303 | 4.46708195  | -0.617621377 | 0.55148588  | 0.55148588  | -5.451490968 |
| 1431657_at   | 0.065152648  | 4.538618325 | 0.617613678  | 0.551490744 | 0.551490744 | -5.451495366 |
| 1418411_at   | -0.046572335 | 5.135606213 | -0.617576509 | 0.551514228 | 0.551514228 | -5.451516595 |
| 1451490_at   | -0.053530872 | 8.140051019 | -0.617549762 | 0.551531128 | 0.551531128 | -5.451531871 |
| 1431301_at   | -0.051310529 | 3.594906922 | -0.61754088  | 0.55153674  | 0.55153674  | -5.451536944 |
| 1440925_at   | -0.047160251 | 7.440640411 | -0.617511996 | 0.551554991 | 0.551554991 | -5.451553439 |
| 1447407_at   | -0.058105631 | 4.652207518 | -0.617503991 | 0.551560048 | 0.551560048 | -5.45155801  |
| 1446237_at   | -0.107839215 | 6.076816546 | -0.617500638 | 0.551562167 | 0.551562167 | -5.451559926 |
| 1441206_at   | -0.037847851 | 3.914042696 | -0.617475528 | 0.551578033 | 0.551578033 | -5.451574265 |
| 1431090_at   | -0.047125555 | 5.464297504 | -0.617436743 | 0.551602541 | 0.551602541 | -5.451596412 |
| 1439767_at   | -0.047794066 | 3.588563002 | -0.617374074 | 0.551642141 | 0.551642141 | -5.451632196 |
| 1439853_at   | -0.060666082 | 4.341964747 | -0.617371938 | 0.551643491 | 0.551643491 | -5.451633416 |
| 1459982_a_at | 0.063109913  | 3.838630736 | 0.617371116  | 0.55164401  | 0.55164401  | -5.451633884 |
| 1417162_at   | 0.047132767  | 8.56982891  | 0.617368056  | 0.551645943 | 0.551645943 | -5.451635632 |
| 1428459_at   | 0.046770519  | 4.989772166 | 0.617344399  | 0.551660893 | 0.551660893 | -5.451649139 |
| 1442544_at   | -0.055180545 | 4.191359356 | -0.617178241 | 0.551765898 | 0.551765898 | -5.451743994 |
| 1452575_at   | 0.048070268  | 3.434472606 | 0.617156958  | 0.551779349 | 0.551779349 | -5.451756142 |
| 1448307_at   | 0.044406116  | 9.784289414 | 0.617108721  | 0.551809835 | 0.551809835 | -5.451783674 |
| 1451195_a_at | -0.048317232 | 10.08872769 | -0.617044115 | 0.551850668 | 0.551850668 | -5.451820546 |
| 1447372_at   | 0.075976686  | 6.714042425 | 0.616995064  | 0.551881671 | 0.551881671 | -5.451848537 |
| 1442158_at   | 0.061227457  | 3.662004427 | 0.616948776  | 0.551910929 | 0.551910929 | -5.451874951 |
| 1439395_at   | 0.054694738  | 4.545830748 | 0.616948246  | 0.551911264 | 0.551911264 | -5.451875253 |
| 1426908_at   | -0.051179714 | 7.802692769 | -0.616922073 | 0.551927808 | 0.551927808 | -5.451890187 |
| 1455296_at   | -0.043173112 | 6.342398152 | -0.616920073 | 0.551929072 | 0.551929072 | -5.451891328 |
| 1429164_at   | -0.045406709 | 6.744156192 | -0.616912755 | 0.551933698 | 0.551933698 | -5.451895504 |
| 1419951_at   | -0.073613263 | 5.469268754 | -0.616853869 | 0.551970921 | 0.551970921 | -5.451929102 |
| 1445769_at   | -0.048440584 | 3.352505319 | -0.616758214 | 0.552031389 | 0.552031389 | -5.451983672 |
| 1440759_at   | 0.039244842  | 3.924693848 | 0.616687273  | 0.552076236 | 0.552076236 | -5.452024137 |
| 1444049_at   | 0.045727389  | 5.004538083 | 0.61664883   | 0.55210054  | 0.55210054  | -5.452046064 |
| 1421826_at   | 0.076811798  | 6.158637088 | 0.616610417  | 0.552124825 | 0.552124825 | -5.452067972 |
| 1434976_x_at | 0.042906513  | 8.879687336 | 0.616570408  | 0.552150121 | 0.552150121 | -5.45209079  |
| 1429933_at   | 0.063691353  | 4.892306178 | 0.616504515  | 0.552191782 | 0.552191782 | -5.452128366 |
| 1437061_at   | 0.041737218  | 8.444450304 | 0.616467976  | 0.552214885 | 0.552214885 | -5.452149201 |
| 1420631_a_at | 0.036913246  | 9.026424052 | 0.616467012  | 0.552215495 | 0.552215495 | -5.452149751 |
| 1453827_at   | 0.04251308   | 4.15580661  | 0.616450576  | 0.552225887 | 0.552225887 | -5.452159123 |
| 1420949_at   | 0.044654662  | 5.601768803 | 0.61642781   | 0.552240282 | 0.552240282 | -5.452172103 |

|              |              |             |              |             |             |              |
|--------------|--------------|-------------|--------------|-------------|-------------|--------------|
| 1431581_at   | -0.03793958  | 3.879324505 | -0.616424454 | 0.552242404 | 0.552242404 | -5.452174017 |
| 1457143_at   | 0.085715244  | 5.230384223 | 0.616343603  | 0.552293528 | 0.552293528 | -5.452220112 |
| 1438190_x_at | 0.054183819  | 2.861170147 | 0.616320797  | 0.552307949 | 0.552307949 | -5.452233114 |
| 1442615_at   | 0.086581625  | 4.622414807 | 0.616295417  | 0.552323998 | 0.552323998 | -5.452247582 |
| 1428513_at   | -0.06735294  | 6.939752114 | -0.616269949 | 0.552340103 | 0.552340103 | -5.4522621   |
| 1452744_at   | -0.051163585 | 6.225040163 | -0.616248402 | 0.552353729 | 0.552353729 | -5.452274383 |
| 1449425_at   | -0.05624437  | 6.872866747 | -0.616240269 | 0.552358872 | 0.552358872 | -5.452279019 |
| 1431784_a_at | 0.053600749  | 8.135372605 | 0.616205838  | 0.552380646 | 0.552380646 | -5.452298644 |
| 1455732_at   | 0.070677804  | 9.641078783 | 0.616175749  | 0.552399674 | 0.552399674 | -5.452315794 |
| 1433807_at   | 0.04559814   | 7.757307881 | 0.616174045  | 0.552400752 | 0.552400752 | -5.452316765 |
| 1441874_x_at | 0.056490208  | 3.124916636 | 0.616164578  | 0.552406739 | 0.552406739 | -5.452322161 |
| 1425305_at   | 0.039504243  | 7.156127872 | 0.616147162  | 0.552417753 | 0.552417753 | -5.452332087 |
| 1431536_at   | 0.045195212  | 3.488567201 | 0.616072949  | 0.552464688 | 0.552464688 | -5.452374381 |
| 1447883_x_at | -0.054830528 | 11.29534448 | -0.616004318 | 0.552508095 | 0.552508095 | -5.45241349  |
| 1424941_at   | 0.061765582  | 3.559997743 | 0.616001811  | 0.55250968  | 0.55250968  | -5.452414918 |
| 1441082_at   | -0.043989962 | 6.615605036 | -0.615997763 | 0.552512241 | 0.552512241 | -5.452417225 |
| 1447922_at   | 0.060600849  | 5.890190114 | 0.615941576  | 0.552547778 | 0.552547778 | -5.452449239 |
| 1442346_at   | 0.052776161  | 4.132434081 | 0.615935917  | 0.552551358 | 0.552551358 | -5.452452463 |
| 1418254_at   | -0.042668499 | 9.176124347 | -0.615902651 | 0.552572399 | 0.552572399 | -5.452471416 |
| 1437596_at   | -0.070599232 | 4.221392386 | -0.615893515 | 0.552578178 | 0.552578178 | -5.452476621 |
| 1445578_at   | 0.05324401   | 4.826690387 | 0.615887194  | 0.552582176 | 0.552582176 | -5.452480222 |
| 1453765_at   | -0.07995685  | 4.347940478 | -0.615865618 | 0.552595824 | 0.552595824 | -5.452492514 |
| 1442024_at   | -0.081507441 | 5.251724469 | -0.615854259 | 0.552603008 | 0.552603008 | -5.452498985 |
| 1416480_a_at | -0.043302398 | 10.49680848 | -0.615834978 | 0.552615204 | 0.552615204 | -5.452509969 |
| 1458440_at   | 0.070684168  | 6.181308987 | 0.615754302  | 0.552666238 | 0.552666238 | -5.452555925 |
| 1423662_at   | 0.044085882  | 9.861459552 | 0.615750575  | 0.552668595 | 0.552668595 | -5.452558048 |
| 1419656_at   | -0.056492058 | 8.415598343 | -0.615646608 | 0.552734365 | 0.552734365 | -5.452617263 |
| 1456989_at   | -0.064785266 | 3.257665357 | -0.615634904 | 0.55274177  | 0.55274177  | -5.452623928 |
| 1443314_at   | 0.079719151  | 7.803388992 | 0.615561026  | 0.552788509 | 0.552788509 | -5.452665999 |
| 1432222_at   | -0.050747068 | 3.394272544 | -0.615510254 | 0.552820631 | 0.552820631 | -5.45269491  |
| 1458099_at   | -0.094431007 | 6.194249134 | -0.615509311 | 0.552821227 | 0.552821227 | -5.452695446 |
| 1449410_a_at | -0.048854104 | 11.5600345  | -0.615413604 | 0.552881782 | 0.552881782 | -5.452749938 |
| 1448321_at   | -0.075797409 | 6.780289717 | -0.6154082   | 0.552885201 | 0.552885201 | -5.452753014 |
| 1455531_at   | 0.070028315  | 4.458804524 | 0.615406165  | 0.552886488 | 0.552886488 | -5.452754173 |
| 1441458_at   | 0.068658196  | 5.243480997 | 0.615336101  | 0.552930821 | 0.552930821 | -5.452794058 |
| 1457053_at   | 0.039607396  | 7.235390782 | 0.615325966  | 0.552937234 | 0.552937234 | -5.452799828 |
| 1450463_at   | 0.047789705  | 6.200906996 | 0.61525067   | 0.552984879 | 0.552984879 | -5.452842687 |
| 1418585_at   | 0.058292205  | 7.514081853 | 0.615246804  | 0.552987326 | 0.552987326 | -5.452844887 |
| 1426863_at   | 0.039125934  | 9.81860154  | 0.615224897  | 0.553001188 | 0.553001188 | -5.452857356 |
| 1455959_s_at | 0.043675118  | 7.9810548   | 0.615182397  | 0.553028083 | 0.553028083 | -5.452881544 |
| 1448900_at   | -0.045333284 | 7.12029223  | -0.615167877 | 0.553037271 | 0.553037271 | -5.452889808 |
| 1454265_a_at | -0.054480828 | 4.941373487 | -0.615122031 | 0.553066284 | 0.553066284 | -5.452915898 |
| 1439522_at   | 0.04737612   | 5.164048675 | 0.615115481  | 0.553070429 | 0.553070429 | -5.452919625 |
| 1440727_at   | -0.041668725 | 4.098646321 | -0.615113615 | 0.553071611 | 0.553071611 | -5.452920687 |
| 1431072_a_at | -0.061350092 | 7.751126718 | -0.615094926 | 0.553083438 | 0.553083438 | -5.452931322 |
| 1448216_at   | 0.050511013  | 4.533548106 | 0.615092836  | 0.553084761 | 0.553084761 | -5.452932512 |
| 1446548_at   | 0.05291958   | 6.324416724 | 0.615077882  | 0.553094224 | 0.553094224 | -5.452941021 |
| 1435668_at   | 0.051903488  | 7.525048718 | 0.614984303  | 0.553153449 | 0.553153449 | -5.452994266 |
| 1449860_at   | -0.053915089 | 3.760825036 | -0.614952992 | 0.553173266 | 0.553173266 | -5.45301208  |
| 1443658_at   | 0.047007079  | 3.809682352 | 0.614914439  | 0.553197667 | 0.553197667 | -5.453034014 |
| 1451148_at   | -0.048833477 | 8.387269472 | -0.614859424 | 0.553232488 | 0.553232488 | -5.45306531  |
| 1425952_a_at | -0.04207007  | 3.484145944 | -0.614844657 | 0.553241835 | 0.553241835 | -5.45307371  |
| 1433305_at   | -0.056121277 | 4.445344111 | -0.614820755 | 0.553256964 | 0.553256964 | -5.453087306 |

|              |              |             |              |             |             |              |
|--------------|--------------|-------------|--------------|-------------|-------------|--------------|
| 1442005_at   | -0.053001898 | 5.576784405 | -0.614815418 | 0.553260342 | 0.553260342 | -5.453090341 |
| 1431286_at   | 0.045086755  | 4.215201621 | 0.614809194  | 0.553264282 | 0.553264282 | -5.453093882 |
| 1428328_at   | 0.051882015  | 9.181903736 | 0.614802804  | 0.553268327 | 0.553268327 | -5.453097516 |
| 1422173_at   | 0.073713755  | 4.447398098 | 0.614739669  | 0.553308291 | 0.553308291 | -5.453133426 |
| 1420255_at   | 0.058866833  | 3.061567996 | 0.614726163  | 0.55331684  | 0.55331684  | -5.453141107 |
| 1421683_at   | -0.048861009 | 5.176699948 | -0.614669403 | 0.55335277  | 0.55335277  | -5.453173387 |
| 1429007_at   | 0.064671631  | 5.171572382 | 0.614621419  | 0.553383146 | 0.553383146 | -5.453200674 |
| 1416778_at   | -0.049393287 | 8.166574801 | -0.614591381 | 0.553402162 | 0.553402162 | -5.453217754 |
| 1449901_a_at | 0.077368338  | 4.765014329 | 0.614548017  | 0.553429614 | 0.553429614 | -5.453242411 |
| 1439281_at   | -0.067418523 | 4.391494461 | -0.614486405 | 0.553468621 | 0.553468621 | -5.453277441 |
| 1436715_s_at | 0.06721662   | 9.970113308 | 0.614385993  | 0.553532194 | 0.553532194 | -5.453334523 |
| 1449699_s_at | 0.073615928  | 7.558324549 | 0.614368787  | 0.553543088 | 0.553543088 | -5.453344304 |
| 1459066_at   | -0.056765287 | 4.116397788 | -0.614318246 | 0.553575089 | 0.553575089 | -5.453373032 |
| 1451697_a_at | 0.044486442  | 5.953923651 | 0.614296309  | 0.55358898  | 0.55358898  | -5.453385501 |
| 1423902_s_at | -0.049655045 | 9.469780208 | -0.614221644 | 0.553636257 | 0.553636257 | -5.453427935 |
| 1443932_at   | 0.042078942  | 6.709978047 | 0.614158905  | 0.553675986 | 0.553675986 | -5.453463589 |
| 1418364_a_at | 0.040885347  | 11.86550636 | 0.614133673  | 0.553691964 | 0.553691964 | -5.453477927 |
| 1451927_a_at | -0.0711442   | 6.475453826 | -0.614133057 | 0.553692354 | 0.553692354 | -5.453478277 |
| 1442513_at   | 0.092905626  | 6.717956253 | 0.614055815  | 0.55374127  | 0.55374127  | -5.453522166 |
| 1438562_a_at | 0.062046759  | 10.07241643 | 0.613970754  | 0.553795139 | 0.553795139 | -5.453570491 |
| 1426031_a_at | -0.060578428 | 4.135822282 | -0.6139117   | 0.553832539 | 0.553832539 | -5.453604038 |
| 1423958_a_at | 0.047496763  | 8.704479494 | 0.613896342  | 0.553842267 | 0.553842267 | -5.453612762 |
| 1452971_at   | -0.039914164 | 8.878843429 | -0.613866059 | 0.553861446 | 0.553861446 | -5.453629963 |
| 1415932_x_at | 0.040211368  | 8.341277422 | 0.613828761  | 0.55388507  | 0.55388507  | -5.453651148 |
| 1450864_at   | -0.045296033 | 8.407567601 | -0.613797465 | 0.553904893 | 0.553904893 | -5.453668923 |
| 1458828_at   | 0.071900558  | 5.032747718 | 0.613774575  | 0.553919391 | 0.553919391 | -5.453681923 |
| 1436959_x_at | 0.070285091  | 10.96759403 | 0.613736104  | 0.553943759 | 0.553943759 | -5.453703772 |
| 1431881_at   | 0.044405954  | 3.374619221 | 0.613715889  | 0.553956564 | 0.553956564 | -5.453715251 |
| 1442872_at   | -0.082367719 | 3.921578976 | -0.613702571 | 0.553964999 | 0.553964999 | -5.453722814 |
| 1434725_at   | 0.061001711  | 7.225335176 | 0.613675648  | 0.553982054 | 0.553982054 | -5.453738103 |
| 1435941_at   | -0.061852353 | 6.828547966 | -0.613643217 | 0.554002597 | 0.554002597 | -5.453756518 |
| 1449304_at   | -0.057934704 | 7.218387417 | -0.613602798 | 0.554028201 | 0.554028201 | -5.453779468 |
| 1417310_at   | -0.055489871 | 8.179358563 | -0.613602416 | 0.554028443 | 0.554028443 | -5.453779685 |
| 1416039_x_at | 0.060965898  | 8.379380273 | 0.613596045  | 0.554032479 | 0.554032479 | -5.453783302 |
| 1430470_at   | 0.052190384  | 3.906332398 | 0.613584004  | 0.554040107 | 0.554040107 | -5.453790139 |
| 1459554_at   | -0.046018495 | 3.087704078 | -0.613457286 | 0.554120384 | 0.554120384 | -5.453862078 |
| 1428988_at   | 0.063514094  | 4.94517396  | 0.613443668  | 0.554129011 | 0.554129011 | -5.453869809 |
| 1441287_at   | -0.075787112 | 5.538045968 | -0.613439615 | 0.554131579 | 0.554131579 | -5.453872109 |
| 1422497_at   | -0.037731966 | 9.80624533  | -0.613413554 | 0.55414809  | 0.55414809  | -5.453886902 |
| 1419371_s_at | -0.039461677 | 10.01463996 | -0.613386716 | 0.554165093 | 0.554165093 | -5.453902136 |
| 1435698_at   | -0.051703407 | 8.008063633 | -0.613337547 | 0.554196245 | 0.554196245 | -5.453930043 |
| 1426732_at   | -0.049531942 | 4.395526721 | -0.613331986 | 0.554199769 | 0.554199769 | -5.453933199 |
| 1452314_at   | 0.045324845  | 8.174950203 | 0.6133223    | 0.554205905 | 0.554205905 | -5.453938697 |
| 1438790_x_at | -0.049419647 | 9.100544566 | -0.613167955 | 0.554303702 | 0.554303702 | -5.454026284 |
| 1425641_at   | 0.077103892  | 4.220174695 | 0.613166719  | 0.554304485 | 0.554304485 | -5.454026986 |
| 1445103_at   | 0.070596619  | 5.165568153 | 0.613125313  | 0.554330722 | 0.554330722 | -5.45405048  |
| 1429990_at   | -0.045843819 | 4.578200403 | -0.613111034 | 0.554339771 | 0.554339771 | -5.454058581 |
| 1435752_s_at | 0.105313571  | 7.727668816 | 0.613052422  | 0.554376912 | 0.554376912 | -5.454091834 |
| 1458976_at   | -0.058848602 | 5.82783149  | -0.613048369 | 0.554379481 | 0.554379481 | -5.454094133 |
| 1429906_at   | 0.043952326  | 3.693566663 | 0.612993058  | 0.554414532 | 0.554414532 | -5.454125511 |
| 1442358_at   | 0.054734055  | 8.623261062 | 0.612990554  | 0.554416119 | 0.554416119 | -5.454126932 |
| 1452219_at   | -0.056517571 | 7.570306098 | -0.612967896 | 0.554430478 | 0.554430478 | -5.454139784 |
| 1442001_at   | -0.059417139 | 6.852586731 | -0.612868834 | 0.55449326  | 0.55449326  | -5.454195973 |

|                    |              |             |              |             |             |              |
|--------------------|--------------|-------------|--------------|-------------|-------------|--------------|
| 1452493_s_at       | -0.051447549 | 3.709955879 | -0.612821543 | 0.554523232 | 0.554523232 | -5.454222794 |
| 1455952_at         | -0.062030853 | 5.074953668 | -0.612779989 | 0.554549569 | 0.554549569 | -5.454246359 |
| 1426942_at         | 0.059674238  | 5.433744007 | 0.612688191  | 0.554607753 | 0.554607753 | -5.454298413 |
| 1419746_at         | -0.068547001 | 5.692636213 | -0.612667453 | 0.554620898 | 0.554620898 | -5.454310172 |
| 1458309_at         | -0.047817768 | 8.868055982 | -0.61261479  | 0.55465428  | 0.55465428  | -5.45434003  |
| 1459687_x_at       | -0.056003449 | 5.824578566 | -0.61259704  | 0.554665531 | 0.554665531 | -5.454350093 |
| 1418474_at         | 0.041132449  | 5.978189807 | 0.61259247   | 0.554668428 | 0.554668428 | -5.454352684 |
| 1419733_at         | -0.041859889 | 3.253668732 | -0.612528448 | 0.554709012 | 0.554709012 | -5.454388978 |
| 1423332_at         | 0.037569576  | 11.35937259 | 0.612526589  | 0.554710191 | 0.554710191 | -5.454390032 |
| 1437936_at         | -0.037748229 | 4.233148587 | -0.612519348 | 0.554714781 | 0.554714781 | -5.454394137 |
| 1433238_at         | -0.055029513 | 4.036621052 | -0.612462395 | 0.554750885 | 0.554750885 | -5.45442642  |
| 1431237_at         | 0.043194969  | 5.214382173 | 0.612460531  | 0.554752067 | 0.554752067 | -5.454427477 |
| 1458531_at         | -0.062082134 | 4.958700615 | -0.612412983 | 0.55478221  | 0.55478221  | -5.454454427 |
| 1458630_at         | -0.063058656 | 4.048145842 | -0.612334563 | 0.554831927 | 0.554831927 | -5.454498871 |
| 1433350_at         | -0.062717224 | 4.26834383  | -0.612279448 | 0.554866871 | 0.554866871 | -5.454530104 |
| 1426843_at         | -0.061495343 | 6.857344854 | -0.612213729 | 0.554908538 | 0.554908538 | -5.454567343 |
| 1452188_at         | -0.072400588 | 7.644976335 | -0.612185527 | 0.55492642  | 0.55492642  | -5.454583322 |
| 1420278_at         | -0.064395587 | 3.78323166  | -0.612182249 | 0.554928498 | 0.554928498 | -5.454585179 |
| 1434161_at         | 0.066125948  | 7.595897085 | 0.612113817  | 0.554971889 | 0.554971889 | -5.45462395  |
| 1431300_at         | -0.069418039 | 6.817761168 | -0.612069459 | 0.555000017 | 0.555000017 | -5.454649079 |
| 1447073_at         | -0.040795147 | 3.508835075 | -0.612055907 | 0.55500861  | 0.55500861  | -5.454656756 |
| AFFX-r2-Bs-thr-3_s | 0.094248061  | 7.866504665 | 0.612027584  | 0.55502657  | 0.55502657  | -5.4546728   |
| 1449214_a_at       | -0.052932756 | 6.84647996  | -0.61200342  | 0.555041893 | 0.555041893 | -5.454686487 |
| 1416913_at         | 0.041221686  | 3.671704451 | 0.611983949  | 0.555054241 | 0.555054241 | -5.454697516 |
| 1435598_at         | -0.07403879  | 5.766664216 | -0.611947132 | 0.555077589 | 0.555077589 | -5.454718369 |
| 1458012_at         | 0.047103742  | 3.723180942 | 0.611921989  | 0.555093533 | 0.555093533 | -5.45473261  |
| 1444008_at         | 0.041807255  | 7.828306052 | 0.611921618  | 0.555093768 | 0.555093768 | -5.45473282  |
| 1452460_at         | -0.060416038 | 6.216790274 | -0.611878678 | 0.555121    | 0.555121    | -5.454757138 |
| 1446084_at         | 0.05229079   | 4.423207781 | 0.611819816  | 0.55515833  | 0.55515833  | -5.454790472 |
| 1420690_at         | 0.037948329  | 4.537842152 | 0.611793012  | 0.55517533  | 0.55517533  | -5.454805651 |
| 1426977_at         | 0.036635495  | 9.985249716 | 0.611766654  | 0.555192046 | 0.555192046 | -5.454820575 |
| 1431835_at         | 0.048488381  | 3.723627157 | 0.611744662  | 0.555205994 | 0.555205994 | -5.454833028 |
| 1423708_a_at       | 0.041812735  | 8.768539576 | 0.611489951  | 0.555367556 | 0.555367556 | -5.454977221 |
| 1435097_at         | -0.062461791 | 7.190303153 | -0.611418983 | 0.555412575 | 0.555412575 | -5.455017386 |
| 1428007_at         | -0.042245258 | 4.301556474 | -0.611404765 | 0.555421595 | 0.555421595 | -5.455025433 |
| 1428944_at         | -0.038810755 | 9.342970753 | -0.6114022   | 0.555423222 | 0.555423222 | -5.455026885 |
| 1429365_at         | -0.06296361  | 4.511214664 | -0.611334533 | 0.55546615  | 0.55546615  | -5.455065177 |
| 1456316_a_at       | 0.063861611  | 7.652682664 | 0.611311593  | 0.555480703 | 0.555480703 | -5.455078157 |
| 1431716_at         | 0.067054426  | 4.986564143 | 0.611298917  | 0.555488745 | 0.555488745 | -5.45508533  |
| 1430599_at         | -0.048285688 | 5.597439599 | -0.611260573 | 0.555513072 | 0.555513072 | -5.455107026 |
| 1418934_at         | -0.056535754 | 9.522974868 | -0.611241697 | 0.555525048 | 0.555525048 | -5.455117706 |
| 1417644_at         | 0.126637665  | 7.746104822 | 0.611220102  | 0.555538749 | 0.555538749 | -5.455129924 |
| 1444355_at         | -0.048737581 | 4.869023743 | -0.61121536  | 0.555541757 | 0.555541757 | -5.455132607 |
| 1448027_at         | 0.059851805  | 7.598110206 | 0.611193431  | 0.555555671 | 0.555555671 | -5.455145013 |
| 1416882_at         | 0.069577392  | 7.243323917 | 0.611116738  | 0.555604331 | 0.555604331 | -5.4551884   |
| 1458432_at         | -0.074469414 | 5.957946811 | -0.611080431 | 0.555627368 | 0.555627368 | -5.455208937 |
| 1458710_at         | 0.064512046  | 6.852100419 | 0.611076534  | 0.555629841 | 0.555629841 | -5.455211141 |
| 1421280_at         | 0.098933823  | 6.079875699 | 0.611060936  | 0.555639738 | 0.555639738 | -5.455219965 |
| 1430260_at         | -0.054672803 | 3.487119948 | -0.611015594 | 0.555668509 | 0.555668509 | -5.455245611 |
| 1437466_at         | -0.036752234 | 10.74009524 | -0.611012021 | 0.555670777 | 0.555670777 | -5.455247632 |
| 1421774_at         | 0.047493647  | 4.874901994 | 0.611004961  | 0.555675256 | 0.555675256 | -5.455251625 |
| 1434212_at         | -0.042309682 | 7.044377434 | -0.610967407 | 0.555699087 | 0.555699087 | -5.455272864 |
| 1419102_at         | -0.048017122 | 7.910129731 | -0.610916384 | 0.555731465 | 0.555731465 | -5.45530172  |

|              |              |             |              |             |             |              |
|--------------|--------------|-------------|--------------|-------------|-------------|--------------|
| 1460167_at   | 0.041197928  | 9.599441367 | 0.610910637  | 0.555735111 | 0.555735111 | -5.455304969 |
| 1423599_a_at | -0.045072661 | 9.065079984 | -0.610874333 | 0.555758149 | 0.555758149 | -5.455325499 |
| 1430285_at   | -0.056339494 | 5.027941521 | -0.610866968 | 0.555762823 | 0.555762823 | -5.455329664 |
| 1421982_a_at | -0.041888539 | 9.607518772 | -0.610788273 | 0.555812765 | 0.555812765 | -5.455374161 |
| 1446743_at   | 0.04346831   | 6.259798074 | 0.610782049  | 0.555816715 | 0.555816715 | -5.45537768  |
| 1428644_at   | -0.080398467 | 6.688496428 | -0.610767594 | 0.555825888 | 0.555825888 | -5.455385853 |
| 1440075_at   | 0.059157625  | 4.103286895 | 0.610745451  | 0.555839942 | 0.555839942 | -5.455398372 |
| 1419804_at   | -0.041611694 | 3.642559077 | -0.61071439  | 0.555859655 | 0.555859655 | -5.455415932 |
| 1457820_at   | -0.071977638 | 6.183687215 | -0.610698807 | 0.555869544 | 0.555869544 | -5.455424742 |
| 1446504_at   | 0.113528261  | 6.197131204 | 0.610595315  | 0.555935231 | 0.555935231 | -5.455483244 |
| 1446522_at   | -0.062513364 | 3.7651319   | -0.610590784 | 0.555938106 | 0.555938106 | -5.455485805 |
| 1438323_at   | -0.074968806 | 5.263164774 | -0.610542439 | 0.555968792 | 0.555968792 | -5.455513131 |
| 1424751_at   | 0.081391914  | 8.246481383 | 0.610527577  | 0.555978226 | 0.555978226 | -5.45552153  |
| 1448841_at   | -0.042835349 | 5.592573118 | -0.610526472 | 0.555978927 | 0.555978927 | -5.455522155 |
| 1446272_at   | -0.071825122 | 6.339637456 | -0.610510899 | 0.555988812 | 0.555988812 | -5.455530956 |
| 1448652_at   | -0.056347252 | 8.025922811 | -0.610499725 | 0.555995905 | 0.555995905 | -5.455537272 |
| 1419186_a_at | -0.042455769 | 7.858077829 | -0.610467963 | 0.556016066 | 0.556016066 | -5.455555222 |
| 1459673_at   | 0.048759697  | 4.443134405 | 0.610465324  | 0.556017742 | 0.556017742 | -5.455556714 |
| 1440800_at   | 0.042840726  | 5.279538346 | 0.610437751  | 0.556035244 | 0.556035244 | -5.455572295 |
| 1455881_at   | 0.065263288  | 6.387573926 | 0.610435081  | 0.556036939 | 0.556036939 | -5.455573804 |
| 1423831_at   | 0.070090547  | 6.128242762 | 0.610349524  | 0.556091251 | 0.556091251 | -5.45562215  |
| 1416592_at   | 0.053154532  | 7.183932032 | 0.610261072  | 0.556147403 | 0.556147403 | -5.455672125 |
| 1455465_at   | 0.055046563  | 6.977688396 | 0.610251418  | 0.556153531 | 0.556153531 | -5.455677579 |
| 1444064_at   | -0.040824362 | 6.285554565 | -0.610242541 | 0.556159167 | 0.556159167 | -5.455682594 |
| 1446750_at   | -0.065929141 | 7.084123652 | -0.610227021 | 0.55616902  | 0.55616902  | -5.455691361 |
| 1448184_at   | 0.044300306  | 11.25686958 | 0.610148268  | 0.556219019 | 0.556219019 | -5.455735849 |
| 1453439_at   | -0.052214346 | 5.132582008 | -0.61014547  | 0.556220796 | 0.556220796 | -5.45573743  |
| 1418893_at   | 0.057710151  | 9.371061201 | 0.61011703   | 0.556238852 | 0.556238852 | -5.455753494 |
| 1450106_a_at | -0.07218725  | 8.747188319 | -0.61009637  | 0.55625197  | 0.55625197  | -5.455765163 |
| 1444752_at   | -0.056814781 | 3.977606066 | -0.610073619 | 0.556266415 | 0.556266415 | -5.455778013 |
| 1434703_at   | -0.070972807 | 8.674826623 | -0.610052877 | 0.556279585 | 0.556279585 | -5.455789728 |
| 1450931_at   | 0.089426327  | 5.991559395 | 0.610029877  | 0.556294189 | 0.556294189 | -5.455802718 |
| 1444381_at   | 0.054258869  | 5.680480336 | 0.609999843  | 0.556313259 | 0.556313259 | -5.45581968  |
| 1428302_at   | -0.042361886 | 9.036482343 | -0.609956251 | 0.556340938 | 0.556340938 | -5.455844296 |
| 1434659_at   | 0.058713923  | 8.08496349  | 0.609945043  | 0.556348055 | 0.556348055 | -5.455850626 |
| 1419024_at   | 0.052538338  | 8.054407859 | 0.60992931   | 0.556358046 | 0.556358046 | -5.45585951  |
| 1433419_at   | 0.064523453  | 4.796629821 | 0.609927752  | 0.556359035 | 0.556359035 | -5.45586039  |
| 1439484_at   | 0.05018888   | 8.563993068 | 0.609924545  | 0.556361071 | 0.556361071 | -5.4558622   |
| 1416174_at   | 0.110849994  | 8.118784134 | 0.609901026  | 0.556376006 | 0.556376006 | -5.455875481 |
| 1425136_x_at | -0.056385876 | 7.448384165 | -0.609837562 | 0.556416307 | 0.556416307 | -5.455911314 |
| 1448635_at   | 0.042767285  | 10.15475813 | 0.609801849  | 0.556438985 | 0.556438985 | -5.455931477 |
| 1447292_at   | -0.03967953  | 3.719737129 | -0.609753843 | 0.556469472 | 0.556469472 | -5.455958579 |
| 1426610_a_at | 0.081541328  | 6.845800993 | 0.609725996  | 0.556487157 | 0.556487157 | -5.455974299 |
| 1440245_at   | 0.066559423  | 4.912952389 | 0.609722463  | 0.5564894   | 0.5564894   | -5.455976294 |
| 1452218_at   | 0.045136873  | 7.277844189 | 0.609682389  | 0.55651485  | 0.55651485  | -5.455998915 |
| 1436420_a_at | 0.06591397   | 9.96681059  | 0.609549698  | 0.556599125 | 0.556599125 | -5.456073807 |
| 1423188_a_at | 0.041870238  | 10.53261542 | 0.609510623  | 0.556623944 | 0.556623944 | -5.456095859 |
| 1433832_at   | -0.04329651  | 9.364982642 | -0.609494605 | 0.556634118 | 0.556634118 | -5.456104898 |
| 1444287_at   | -0.049894434 | 4.856312182 | -0.609474116 | 0.556647132 | 0.556647132 | -5.45611646  |
| 1457236_at   | -0.068846654 | 3.908251943 | -0.609465634 | 0.556652519 | 0.556652519 | -5.456121246 |
| 1450769_s_at | 0.05656327   | 6.970962257 | 0.60945223   | 0.556661034 | 0.556661034 | -5.45612881  |
| 1440293_at   | 0.064032422  | 4.618687144 | 0.609424511  | 0.556678641 | 0.556678641 | -5.456144451 |
| 1460423_x_at | -0.038916978 | 3.278974763 | -0.609384927 | 0.556703784 | 0.556703784 | -5.456166785 |

|              |              |             |              |             |             |              |
|--------------|--------------|-------------|--------------|-------------|-------------|--------------|
| 1446100_at   | 0.069639749  | 5.156668251 | 0.60938168   | 0.556705847 | 0.556705847 | -5.456168617 |
| 1451336_at   | -0.06035663  | 5.805118833 | -0.609338539 | 0.556733252 | 0.556733252 | -5.456192957 |
| 1438851_x_at | -0.052805929 | 3.271921566 | -0.609327591 | 0.556740206 | 0.556740206 | -5.456199134 |
| 1438918_at   | -0.09690052  | 5.17425732  | -0.609314411 | 0.556748578 | 0.556748578 | -5.456206569 |
| 1416794_at   | 0.042056282  | 8.062688244 | 0.609230797  | 0.556801695 | 0.556801695 | -5.456253738 |
| 1437261_at   | 0.0637148    | 5.05573758  | 0.609209969  | 0.556814927 | 0.556814927 | -5.456265487 |
| 1451892_at   | -0.070866574 | 4.298404185 | -0.609168164 | 0.556841485 | 0.556841485 | -5.456289066 |
| 1456481_at   | -0.080019695 | 4.69262008  | -0.609133062 | 0.556863786 | 0.556863786 | -5.456308865 |
| 1447647_at   | -0.048795126 | 6.995420022 | -0.609127746 | 0.556867163 | 0.556867163 | -5.456311863 |
| 1428229_at   | 0.049144754  | 10.02097521 | 0.609125866  | 0.556868358 | 0.556868358 | -5.456312923 |
| 1430901_at   | -0.052450362 | 4.545718777 | -0.609118152 | 0.556873259 | 0.556873259 | -5.456317274 |
| 1431086_s_at | -0.064369165 | 8.593618341 | -0.609112575 | 0.556876802 | 0.556876802 | -5.456320419 |
| 1448890_at   | -0.081027039 | 7.888793497 | -0.609051429 | 0.55691565  | 0.55691565  | -5.456354904 |
| 1439606_at   | -0.046498684 | 6.422811567 | -0.609047887 | 0.556917901 | 0.556917901 | -5.456356901 |
| 1440763_at   | -0.047767501 | 5.40804835  | -0.609008507 | 0.556942921 | 0.556942921 | -5.456379108 |
| 1426336_at   | -0.059517601 | 4.493192542 | -0.608978158 | 0.556962204 | 0.556962204 | -5.456396221 |
| 1442479_at   | -0.046046602 | 3.785086492 | -0.608970837 | 0.556966856 | 0.556966856 | -5.456400349 |
| 1437888_at   | 0.065482671  | 6.603953157 | 0.608957884  | 0.556975086 | 0.556975086 | -5.456407653 |
| 1425551_at   | 0.045944783  | 5.493348071 | 0.608872632  | 0.557029256 | 0.557029256 | -5.456455719 |
| 1441246_s_at | 0.056896615  | 3.962027695 | 0.608871512  | 0.557029967 | 0.557029967 | -5.456456351 |
| 1436142_at   | -0.064510283 | 3.965673696 | -0.608840684 | 0.557049557 | 0.557049557 | -5.456473731 |
| 1424427_at   | -0.044228958 | 8.693689903 | -0.608822287 | 0.557061247 | 0.557061247 | -5.456484102 |
| 1460301_at   | 0.051661686  | 3.286137394 | 0.608822172  | 0.55706132  | 0.55706132  | -5.456484167 |
| 1447784_x_at | -0.058032437 | 5.563636536 | -0.608818723 | 0.557063511 | 0.557063511 | -5.456486111 |
| 1446347_at   | -0.042677663 | 6.767577512 | -0.608802944 | 0.557073538 | 0.557073538 | -5.456495006 |
| 1421192_a_at | -0.046615123 | 5.387973014 | -0.608690482 | 0.557145005 | 0.557145005 | -5.456558399 |
| 1430061_at   | -0.052936362 | 4.582293415 | -0.608645374 | 0.557173672 | 0.557173672 | -5.456583822 |
| 1446732_at   | -0.099934296 | 5.333174632 | -0.608586574 | 0.557211041 | 0.557211041 | -5.45661696  |
| 1437575_at   | 0.04819841   | 3.099339051 | 0.608555896  | 0.557230538 | 0.557230538 | -5.456634247 |
| 1448571_a_at | 0.055975088  | 7.300070452 | 0.608542766  | 0.557238883 | 0.557238883 | -5.456641646 |
| 1418215_at   | -0.046824294 | 3.454131362 | -0.608493064 | 0.557270473 | 0.557270473 | -5.456669653 |
| 1426287_at   | 0.041276178  | 6.39131667  | 0.608453332  | 0.557295726 | 0.557295726 | -5.456692039 |
| 1449553_at   | -0.042821382 | 8.783129697 | -0.608417964 | 0.557318206 | 0.557318206 | -5.456711966 |
| 1431614_at   | -0.044197529 | 3.508301079 | -0.608400656 | 0.557329207 | 0.557329207 | -5.456721717 |
| 1448790_at   | 0.046871519  | 5.376914132 | 0.608321148  | 0.557379746 | 0.557379746 | -5.456766508 |
| 1458198_at   | -0.048376783 | 3.740047241 | -0.608316066 | 0.557382976 | 0.557382976 | -5.456769371 |
| 1434944_at   | -0.113495246 | 6.290380943 | -0.60831459  | 0.557383914 | 0.557383914 | -5.456770202 |
| 1445047_at   | -0.052682404 | 3.219902375 | -0.608299426 | 0.557393553 | 0.557393553 | -5.456778744 |
| 1433558_at   | -0.046087378 | 8.525419474 | -0.60828383  | 0.557403467 | 0.557403467 | -5.456787529 |
| 1446613_at   | -0.042281129 | 7.27020731  | -0.608245596 | 0.557427771 | 0.557427771 | -5.456809065 |
| 1423729_a_at | 0.038867716  | 9.478456547 | 0.608206855  | 0.557452399 | 0.557452399 | -5.456830886 |
| 1445683_at   | -0.053524665 | 3.954820273 | -0.608190895 | 0.557462545 | 0.557462545 | -5.456839875 |
| 1442653_at   | 0.049458805  | 3.480016003 | 0.608147191  | 0.557490328 | 0.557490328 | -5.456864488 |
| 1424018_at   | 0.04053956   | 11.81172677 | 0.608090027  | 0.557526669 | 0.557526669 | -5.45689668  |
| 1459020_at   | -0.059868609 | 4.437226972 | -0.608062661 | 0.557544067 | 0.557544067 | -5.45691209  |
| 1454444_at   | 0.052180254  | 4.347512939 | 0.608056798  | 0.557547794 | 0.557547794 | -5.456915391 |
| 1422974_at   | 0.048946729  | 6.903194265 | 0.60805441   | 0.557549313 | 0.557549313 | -5.456916736 |
| 1448220_at   | -0.048247477 | 4.90745381  | -0.608022848 | 0.557569379 | 0.557569379 | -5.456934508 |
| 1436866_at   | -0.057583579 | 9.597454947 | -0.607922652 | 0.557633083 | 0.557633083 | -5.45699092  |
| 1433114_at   | -0.036579421 | 3.783913219 | -0.607865841 | 0.557669205 | 0.557669205 | -5.457022902 |
| 1446824_at   | -0.052027718 | 3.643322251 | -0.60784721  | 0.557681051 | 0.557681051 | -5.45703339  |
| 1429714_at   | -0.045603144 | 7.798006824 | -0.607845194 | 0.557682333 | 0.557682333 | -5.457034525 |
| 1446173_at   | -0.057392674 | 3.91102239  | -0.607772678 | 0.557728444 | 0.557728444 | -5.457075343 |



|              |              |             |              |             |             |              |
|--------------|--------------|-------------|--------------|-------------|-------------|--------------|
| 1442799_x_at | 0.047361884  | 6.395293506 | 0.607711796  | 0.557767158 | 0.557767158 | -5.457109609 |
| 1443664_s_at | -0.064116502 | 4.548702888 | -0.60768697  | 0.557782945 | 0.557782945 | -5.45712358  |
| 1433911_at   | -0.042917721 | 7.331420679 | -0.607620618 | 0.55782514  | 0.55782514  | -5.45716092  |
| 1439805_at   | 0.066948198  | 7.838660558 | 0.607615602  | 0.55782833  | 0.55782833  | -5.457163743 |
| 1456022_at   | 0.060318404  | 8.44806664  | 0.607491353  | 0.557907348 | 0.557907348 | -5.457233653 |
| 1437394_at   | 0.058422337  | 7.502098208 | 0.607472564  | 0.557919298 | 0.557919298 | -5.457244224 |
| 1430356_at   | -0.055096661 | 7.094169264 | -0.607414759 | 0.557956063 | 0.557956063 | -5.457276744 |
| 1422257_s_at | 0.053456313  | 3.553410302 | 0.607407156  | 0.557960898 | 0.557960898 | -5.457281021 |
| 1429511_at   | -0.047313624 | 3.473220244 | -0.607358021 | 0.55799215  | 0.55799215  | -5.45730866  |
| 1452865_at   | 0.086307526  | 5.643838323 | 0.60733971   | 0.558003797 | 0.558003797 | -5.45731896  |
| 1433051_at   | 0.054976523  | 4.69075581  | 0.607305341  | 0.558025658 | 0.558025658 | -5.457338292 |
| 1439937_at   | -0.041559717 | 5.340307954 | -0.607041686 | 0.558193376 | 0.558193376 | -5.457486557 |
| 1454511_at   | -0.051712613 | 3.440436392 | -0.607039886 | 0.558194521 | 0.558194521 | -5.457487568 |
| 1417997_at   | -0.050210812 | 5.81860342  | -0.607001475 | 0.558218957 | 0.558218957 | -5.457509164 |
| 1459372_at   | -0.050028738 | 3.655295731 | -0.60681413  | 0.558338152 | 0.558338152 | -5.457614474 |
| 1443392_at   | -0.038819429 | 3.542477157 | -0.606808199 | 0.558341926 | 0.558341926 | -5.457617807 |
| 1434383_at   | -0.041396615 | 9.92352216  | -0.606800663 | 0.558346721 | 0.558346721 | -5.457622043 |
| 1431129_at   | 0.041533419  | 5.620445155 | 0.606749829  | 0.558379066 | 0.558379066 | -5.457650612 |
| 1425037_at   | 0.041279115  | 3.946744092 | 0.606712583  | 0.558402766 | 0.558402766 | -5.457671543 |
| 1445649_x_at | -0.050967035 | 4.123274511 | -0.606671498 | 0.558428909 | 0.558428909 | -5.45769463  |
| 1427209_at   | 0.041739091  | 5.273023827 | 0.606627612  | 0.558456836 | 0.558456836 | -5.45771929  |
| 1460134_at   | -0.067412835 | 3.84032448  | -0.606576007 | 0.558489675 | 0.558489675 | -5.457748285 |
| 1458883_at   | -0.048149493 | 3.268524479 | -0.606570762 | 0.558493013 | 0.558493013 | -5.457751231 |
| 1437659_at   | 0.042636922  | 3.157741158 | 0.6065693    | 0.558493943 | 0.558493943 | -5.457752052 |
| 1417048_at   | -0.053674214 | 4.719838419 | -0.606533104 | 0.558516978 | 0.558516978 | -5.457772388 |
| 1457794_at   | 0.108264029  | 6.078857744 | 0.606516907  | 0.558527285 | 0.558527285 | -5.457781488 |
| 1416171_at   | 0.039212679  | 10.21061925 | 0.606431528  | 0.558581621 | 0.558581621 | -5.457829449 |
| 1432178_at   | 0.041904624  | 4.095546099 | 0.60639882   | 0.558602438 | 0.558602438 | -5.457847821 |
| 1447349_s_at | 0.048586259  | 9.708653543 | 0.606334052  | 0.55864366  | 0.55864366  | -5.457884199 |
| 1417655_a_at | -0.054310613 | 9.606288399 | -0.606329535 | 0.558646535 | 0.558646535 | -5.457886736 |
| 1459451_at   | -0.05520689  | 3.771506156 | -0.606300671 | 0.558664906 | 0.558664906 | -5.457902946 |
| 1417049_at   | -0.042579606 | 5.506476654 | -0.606287493 | 0.558673294 | 0.558673294 | -5.457910347 |
| 1441719_at   | 0.041235384  | 4.385134968 | 0.60627521   | 0.558681112 | 0.558681112 | -5.457917245 |
| 1450494_x_at | -0.0885439   | 5.772196211 | -0.606235941 | 0.558706107 | 0.558706107 | -5.457939298 |
| 1460524_at   | -0.073907342 | 3.96341298  | -0.606195939 | 0.558731569 | 0.558731569 | -5.45796176  |
| 1420767_at   | 0.04513769   | 5.368255395 | 0.606192621  | 0.558733681 | 0.558733681 | -5.457963623 |
| 1443773_at   | -0.071313385 | 7.404981443 | -0.606178046 | 0.558742958 | 0.558742958 | -5.457971807 |
| 1456384_at   | 0.041371263  | 4.542135046 | 0.606173574  | 0.558745805 | 0.558745805 | -5.457974318 |
| 1415977_at   | -0.048728928 | 9.659955189 | -0.606129902 | 0.558773604 | 0.558773604 | -5.457998839 |
| 1460419_a_at | -0.078036618 | 5.463881924 | -0.606105449 | 0.55878917  | 0.55878917  | -5.458012568 |
| 1435450_at   | 0.03909132   | 9.910297149 | 0.606056536  | 0.558820307 | 0.558820307 | -5.458040029 |
| 1457980_x_at | 0.049961487  | 7.210199725 | 0.605992289  | 0.558861206 | 0.558861206 | -5.458076095 |
| 1424293_s_at | 0.045623123  | 10.70087566 | 0.605946075  | 0.558890627 | 0.558890627 | -5.458102036 |
| 1425785_a_at | 0.070641218  | 3.760736585 | 0.605942049  | 0.55889319  | 0.55889319  | -5.458104296 |
| 1458965_at   | -0.0568056   | 4.034466858 | -0.605897906 | 0.558921293 | 0.558921293 | -5.458129072 |
| 1459587_at   | -0.076534004 | 4.251548775 | -0.605871863 | 0.558937873 | 0.558937873 | -5.458143689 |
| 1446655_at   | -0.066564756 | 4.479208903 | -0.605841324 | 0.558957316 | 0.558957316 | -5.458160828 |
| 1449773_s_at | 0.076720132  | 8.204808565 | 0.605604879  | 0.559107866 | 0.559107866 | -5.458293501 |
| 1423890_x_at | -0.050326351 | 8.6460585   | -0.605586438 | 0.559119608 | 0.559119608 | -5.458303846 |
| 1435896_at   | -0.042272796 | 8.036967852 | -0.605575722 | 0.559126432 | 0.559126432 | -5.458309858 |
| 1440018_at   | -0.066589922 | 4.60142383  | -0.605569656 | 0.559130295 | 0.559130295 | -5.458313261 |
| 1447387_at   | 0.039858975  | 3.327652008 | 0.60556452   | 0.559133565 | 0.559133565 | -5.458316142 |
| 1426829_at   | 0.038217333  | 9.424843723 | 0.605547513  | 0.559144395 | 0.559144395 | -5.458325683 |

|              |              |             |              |             |             |              |
|--------------|--------------|-------------|--------------|-------------|-------------|--------------|
| 1429776_a_at | 0.06704374   | 7.597092746 | 0.60554679   | 0.559144856 | 0.559144856 | -5.458326089 |
| 1443841_x_at | -0.056471484 | 3.339620723 | -0.605522938 | 0.559160045 | 0.559160045 | -5.458339469 |
| 1432208_at   | -0.063521503 | 3.7298605   | -0.605481455 | 0.559186462 | 0.559186462 | -5.458362738 |
| 1439007_at   | 0.07684829   | 6.617650844 | 0.605440529  | 0.559212525 | 0.559212525 | -5.458385693 |
| 1437606_at   | 0.045311668  | 4.963987234 | 0.605430238  | 0.559219078 | 0.559219078 | -5.458391465 |
| 1419992_x_at | 0.043951521  | 3.19307457  | 0.605420869  | 0.559225045 | 0.559225045 | -5.458396719 |
| 1438871_at   | -0.0595559   | 8.021813753 | -0.605318402 | 0.559290303 | 0.559290303 | -5.458454184 |
| 1450664_at   | 0.045153016  | 9.40076065  | 0.60528649   | 0.559310627 | 0.559310627 | -5.458472079 |
| 1448583_at   | -0.040074412 | 8.103698313 | -0.605274431 | 0.559318307 | 0.559318307 | -5.458478841 |
| 1446765_at   | -0.045941744 | 3.229437358 | -0.605252478 | 0.55933229  | 0.55933229  | -5.458491151 |
| 1437820_at   | 0.068755192  | 4.795660038 | 0.605215021  | 0.559356147 | 0.559356147 | -5.458512153 |
| 1417790_at   | -0.052941952 | 6.351307433 | -0.605205385 | 0.559362284 | 0.559362284 | -5.458517555 |
| 1447872_at   | -0.0542165   | 3.143748053 | -0.605120448 | 0.559416385 | 0.559416385 | -5.458565174 |
| 1452053_a_at | 0.055583417  | 8.598619687 | 0.60509442   | 0.559432964 | 0.559432964 | -5.458579766 |
| 1418238_at   | -0.046368762 | 9.002609571 | -0.605091925 | 0.559434553 | 0.559434553 | -5.458581164 |
| 1425067_at   | -0.07222396  | 4.795335815 | -0.60509145  | 0.559434856 | 0.559434856 | -5.458581431 |
| 1456305_x_at | 0.049133508  | 3.449850734 | 0.605032192  | 0.559472603 | 0.559472603 | -5.458614648 |
| 1432131_at   | -0.054844518 | 5.313794494 | -0.604968573 | 0.559513129 | 0.559513129 | -5.458650307 |
| 1438758_at   | -0.288179311 | 7.129515852 | -0.604874224 | 0.559573234 | 0.559573234 | -5.458703183 |
| 1420680_at   | -0.053278496 | 3.150665922 | -0.60483265  | 0.55959972  | 0.55959972  | -5.45872648  |
| 1423704_at   | 0.062079086  | 7.587925132 | 0.604822798  | 0.559605996 | 0.559605996 | -5.458732001 |
| 1417329_at   | -0.045450971 | 7.904340781 | -0.604746913 | 0.559654344 | 0.559654344 | -5.458774521 |
| 1458276_x_at | -0.054174271 | 7.406120079 | -0.604695627 | 0.559687019 | 0.559687019 | -5.458803254 |
| 1459378_at   | -0.053719349 | 4.149741698 | -0.604691097 | 0.559689906 | 0.559689906 | -5.458805793 |
| 1446050_at   | 0.126948793  | 4.991538543 | 0.604681504  | 0.559696017 | 0.559696017 | -5.458811166 |
| 1454148_at   | 0.072858964  | 4.358525718 | 0.604678269  | 0.559698079 | 0.559698079 | -5.458812979 |
| 1422067_at   | -0.038833206 | 3.336894337 | -0.604672807 | 0.559701559 | 0.559701559 | -5.458816039 |
| 1459041_at   | -0.061049463 | 3.158082666 | -0.60465226  | 0.559714651 | 0.559714651 | -5.45882755  |
| 1431540_at   | -0.047145136 | 4.231240892 | -0.604627346 | 0.559730525 | 0.559730525 | -5.458841506 |
| 1418111_at   | -0.058977584 | 3.226135119 | -0.604486418 | 0.559820324 | 0.559820324 | -5.458920444 |
| 1439292_at   | -0.057199775 | 4.250358535 | -0.604421856 | 0.559861466 | 0.559861466 | -5.458956601 |
| 1433502_s_at | 0.040290634  | 8.816833434 | 0.604399978  | 0.559875408 | 0.559875408 | -5.458968853 |
| 1440832_at   | 0.059234552  | 4.276167338 | 0.604398017  | 0.559876657 | 0.559876657 | -5.458969951 |
| 1458959_at   | -0.066131615 | 3.736659359 | -0.604338258 | 0.55991474  | 0.55991474  | -5.459003414 |
| 1428827_at   | -0.047546215 | 7.913972861 | -0.604298768 | 0.559939907 | 0.559939907 | -5.459025525 |
| 1416984_at   | 0.056438345  | 8.633094422 | 0.604241071  | 0.559976678 | 0.559976678 | -5.459057829 |
| 1438034_at   | 0.048873689  | 8.011842987 | 0.604233031  | 0.559981803 | 0.559981803 | -5.45906233  |
| 1437986_x_at | -0.061541402 | 7.553717538 | -0.604179527 | 0.560015903 | 0.560015903 | -5.459092283 |
| 1438977_x_at | -0.068272922 | 11.86906938 | -0.603921176 | 0.560180578 | 0.560180578 | -5.459236881 |
| 1436239_at   | -0.050295536 | 4.406342744 | -0.603906091 | 0.560190194 | 0.560190194 | -5.459245323 |
| 1418961_at   | 0.050640776  | 7.592033041 | 0.603903132  | 0.56019208  | 0.56019208  | -5.459246978 |
| 1439825_at   | -0.037764202 | 5.556837844 | -0.60390146  | 0.560193146 | 0.560193146 | -5.459247914 |
| 1448896_at   | -0.039004015 | 8.10181451  | -0.603901335 | 0.560193226 | 0.560193226 | -5.459247984 |
| 1451319_at   | 0.060143673  | 7.897388993 | 0.603873119  | 0.560211213 | 0.560211213 | -5.459263772 |
| 1438477_a_at | -0.06418989  | 7.447057621 | -0.603866156 | 0.560215651 | 0.560215651 | -5.459267668 |
| 1439171_at   | 0.075544671  | 5.551256454 | 0.603748253  | 0.560290816 | 0.560290816 | -5.459333634 |
| 1430952_at   | 0.05314714   | 3.11169896  | 0.603713849  | 0.56031275  | 0.56031275  | -5.459352881 |
| 1423927_at   | -0.049155568 | 8.787194742 | -0.603681578 | 0.560333323 | 0.560333323 | -5.459370933 |
| 1427369_at   | -0.060350988 | 4.050960966 | -0.603669574 | 0.560340977 | 0.560340977 | -5.459377648 |
| 1431600_at   | -0.056483686 | 3.630962561 | -0.603632076 | 0.560364885 | 0.560364885 | -5.459398623 |
| 1459426_at   | 0.067405946  | 3.913376184 | 0.603610226  | 0.560378816 | 0.560378816 | -5.459410844 |
| 1439453_x_at | -0.047619827 | 9.261969946 | -0.603596208 | 0.560387754 | 0.560387754 | -5.459418684 |
| 1437275_at   | 0.062350858  | 3.107866154 | 0.603560573  | 0.560410474 | 0.560410474 | -5.459438615 |

|              |              |             |              |             |             |              |
|--------------|--------------|-------------|--------------|-------------|-------------|--------------|
| 1455179_at   | 0.062969926  | 6.77909747  | 0.603523476  | 0.560434128 | 0.560434128 | -5.459459362 |
| 1423591_at   | -0.046326028 | 10.23675885 | -0.603512469 | 0.560441147 | 0.560441147 | -5.459465518 |
| 1419886_at   | 0.038512674  | 6.875698946 | 0.603491373  | 0.560454598 | 0.560454598 | -5.459477315 |
| 1449485_at   | -0.042449473 | 8.385620563 | -0.603417574 | 0.560501656 | 0.560501656 | -5.459518583 |
| 1430426_at   | 0.041361152  | 3.363025486 | 0.603395094  | 0.560515991 | 0.560515991 | -5.459531153 |
| 1449091_at   | -0.095334691 | 7.514581033 | -0.603383799 | 0.560523194 | 0.560523194 | -5.459537468 |
| 1434749_at   | 0.05063119   | 7.062943942 | 0.603359819  | 0.560538485 | 0.560538485 | -5.459550876 |
| 1420028_s_at | -0.056178199 | 9.888904639 | -0.603279092 | 0.560589965 | 0.560589965 | -5.459596008 |
| 1455618_x_at | 0.056845196  | 6.586789643 | 0.603239324  | 0.560615326 | 0.560615326 | -5.459618239 |
| 1450699_at   | -0.072147543 | 8.264227653 | -0.603223379 | 0.560625495 | 0.560625495 | -5.459627153 |
| 1438412_at   | 0.050696869  | 4.405609354 | 0.603221747  | 0.560626536 | 0.560626536 | -5.459628065 |
| 1449142_a_at | -0.052347966 | 10.35200323 | -0.603200668 | 0.560639979 | 0.560639979 | -5.459639848 |
| 1432343_at   | 0.049888822  | 5.24942203  | 0.60314846   | 0.560673276 | 0.560673276 | -5.45966903  |
| 1417844_at   | 0.043107154  | 9.400515755 | 0.603099601  | 0.560704437 | 0.560704437 | -5.459696337 |
| 1423966_at   | -0.044305113 | 7.379150887 | -0.603050315 | 0.560735872 | 0.560735872 | -5.459723882 |
| 1446568_at   | 0.050804061  | 4.914413273 | 0.60302272   | 0.560753473 | 0.560753473 | -5.459739303 |
| 1431535_at   | -0.050708549 | 5.311278663 | -0.603007476 | 0.560763196 | 0.560763196 | -5.459747822 |
| 1425830_a_at | 0.049689388  | 8.176015171 | 0.602900138  | 0.560831662 | 0.560831662 | -5.459807798 |
| 1431589_at   | -0.055224305 | 4.166915276 | -0.602885387 | 0.560841072 | 0.560841072 | -5.45981604  |
| 1446018_at   | -0.098231648 | 4.236035743 | -0.602874365 | 0.560848103 | 0.560848103 | -5.459822198 |
| 1426995_a_at | 0.040087999  | 8.137839514 | 0.602848297  | 0.560864731 | 0.560864731 | -5.459836762 |
| 1456002_at   | -0.053937698 | 4.099015252 | -0.602731514 | 0.56093923  | 0.56093923  | -5.459902    |
| 1426459_s_at | 0.039969379  | 10.19066237 | 0.602715838  | 0.56094923  | 0.56094923  | -5.459910756 |
| 1453180_at   | 0.048528437  | 5.445947132 | 0.602676989  | 0.560974014 | 0.560974014 | -5.459932455 |
| 1444688_at   | -0.042940593 | 3.868305401 | -0.602573452 | 0.56104007  | 0.56104007  | -5.459990279 |
| 1452570_at   | -0.044875398 | 3.848568588 | -0.602544424 | 0.561058591 | 0.561058591 | -5.460006489 |
| 1443145_at   | 0.074558614  | 4.495460822 | 0.602538178  | 0.561062576 | 0.561062576 | -5.460009977 |
| 1433363_at   | 0.063727166  | 3.85488655  | 0.602486345  | 0.561095647 | 0.561095647 | -5.46003892  |
| 1446466_at   | 0.058528207  | 5.752410766 | 0.602473041  | 0.561104136 | 0.561104136 | -5.460046349 |
| 1437332_at   | 0.047736891  | 3.211484614 | 0.60247014   | 0.561105987 | 0.561105987 | -5.460047969 |
| 1418015_at   | -0.080568429 | 8.004919946 | -0.602411144 | 0.56114363  | 0.56114363  | -5.460080908 |
| 1442536_at   | 0.069306877  | 6.818168054 | 0.602350365  | 0.561182412 | 0.561182412 | -5.460114839 |
| 1455178_at   | -0.065037199 | 7.053755308 | -0.602292398 | 0.561219402 | 0.561219402 | -5.460147198 |
| 1415997_at   | 0.05009339   | 9.478579978 | 0.602289563  | 0.561221211 | 0.561221211 | -5.460148781 |
| 1452044_at   | 0.04187404   | 9.996310717 | 0.602273713  | 0.561231326 | 0.561231326 | -5.460157628 |
| 1436527_at   | 0.056469652  | 4.652767338 | 0.602235349  | 0.561255807 | 0.561255807 | -5.460179042 |
| 1444426_at   | -0.044881511 | 4.894610232 | -0.602160761 | 0.561303407 | 0.561303407 | -5.460220671 |
| 1449413_at   | -0.048853027 | 6.493193376 | -0.602157492 | 0.561305493 | 0.561305493 | -5.460222496 |
| 1434066_at   | -0.056591561 | 8.913287947 | -0.602110433 | 0.561335526 | 0.561335526 | -5.460248758 |
| 1429117_at   | -0.057166454 | 6.206802821 | -0.602094643 | 0.561345603 | 0.561345603 | -5.460257569 |
| 1430093_at   | -0.064948688 | 4.187746278 | -0.602066392 | 0.561363634 | 0.561363634 | -5.460273334 |
| 1448284_a_at | 0.04418428   | 11.06458847 | 0.601989838  | 0.561412493 | 0.561412493 | -5.46031605  |
| 1439472_at   | 0.070894514  | 4.817643826 | 0.601969646  | 0.56142538  | 0.56142538  | -5.460327315 |
| 1460457_at   | 0.052986728  | 5.90634331  | 0.601946542  | 0.561440127 | 0.561440127 | -5.460340206 |
| 1445464_at   | 0.055773842  | 3.911728187 | 0.601908601  | 0.561464344 | 0.561464344 | -5.460361373 |
| 1446054_at   | -0.056461904 | 3.957068693 | -0.601857444 | 0.561496997 | 0.561496997 | -5.460389911 |
| 1428416_at   | 0.052762227  | 8.49629885  | 0.601853366  | 0.5614996   | 0.5614996   | -5.460392186 |
| 1456071_a_at | 0.064726934  | 11.74715878 | 0.601845198  | 0.561504814 | 0.561504814 | -5.460396742 |
| 1416492_at   | -0.067924272 | 7.74601404  | -0.601803308 | 0.561531553 | 0.561531553 | -5.460420109 |
| 1421535_a_at | -0.051135444 | 6.165736055 | -0.601777604 | 0.561547961 | 0.561547961 | -5.460434446 |
| 1428010_at   | -0.181611528 | 5.610328733 | -0.601766804 | 0.561554855 | 0.561554855 | -5.46044047  |
| 1423689_a_at | -0.073624659 | 8.138393916 | -0.601748924 | 0.561566269 | 0.561566269 | -5.460450443 |
| 1429446_at   | 0.05252222   | 9.687903665 | 0.601742239  | 0.561570536 | 0.561570536 | -5.460454171 |

|              |              |             |              |             |             |              |
|--------------|--------------|-------------|--------------|-------------|-------------|--------------|
| 1451429_at   | 0.060140952  | 7.699098089 | 0.601686283  | 0.561606256 | 0.561606256 | -5.460485378 |
| 1447680_at   | -0.03859884  | 3.492962429 | -0.601677708 | 0.56161173  | 0.56161173  | -5.46049016  |
| 1416807_at   | 0.039686194  | 12.39525951 | 0.601660124  | 0.561622955 | 0.561622955 | -5.460499966 |
| 1445651_at   | -0.047978329 | 7.412225037 | -0.60162265  | 0.561646879 | 0.561646879 | -5.460520864 |
| 1439952_at   | 0.061294032  | 6.371482485 | 0.601558407  | 0.561687893 | 0.561687893 | -5.460556687 |
| 1420707_a_at | 0.04371826   | 7.213458914 | 0.601477794  | 0.561739359 | 0.561739359 | -5.460601632 |
| 1422679_s_at | -0.044338604 | 9.361342924 | -0.601451544 | 0.561756119 | 0.561756119 | -5.460616266 |
| 1444988_at   | 0.048049413  | 3.481162142 | 0.601441184  | 0.561762734 | 0.561762734 | -5.460622042 |
| 1429241_at   | -0.048309849 | 4.504158136 | -0.601440375 | 0.56176325  | 0.56176325  | -5.460622493 |
| 1436138_at   | -0.057462398 | 5.624228853 | -0.601371299 | 0.561807355 | 0.561807355 | -5.460661    |
| 1418085_at   | -0.061976645 | 6.313037067 | -0.601282885 | 0.561863809 | 0.561863809 | -5.46071028  |
| 1456188_at   | -0.056580252 | 3.514915116 | -0.601270031 | 0.561872017 | 0.561872017 | -5.460717444 |
| 1420755_a_at | -0.038546631 | 4.563773435 | -0.601203785 | 0.561914318 | 0.561914318 | -5.460754363 |
| 1456803_at   | 0.044420583  | 5.211271937 | 0.601167574  | 0.561937442 | 0.561937442 | -5.460774543 |
| 1418984_at   | -0.058105814 | 7.756422296 | -0.601160018 | 0.561942267 | 0.561942267 | -5.460778753 |
| 1430861_at   | 0.082670329  | 4.717775183 | 0.601119327  | 0.561968253 | 0.561968253 | -5.460801428 |
| 1444763_at   | -0.070143408 | 5.117122544 | -0.601106194 | 0.56197664  | 0.56197664  | -5.460808745 |
| 1456449_at   | -0.098533101 | 6.266479029 | -0.601040471 | 0.562018612 | 0.562018612 | -5.460845364 |
| 1435902_at   | 0.060952641  | 7.35371235  | 0.600965137  | 0.562066724 | 0.562066724 | -5.460887333 |
| 1435159_at   | -0.043668756 | 7.552521206 | -0.600879599 | 0.562121357 | 0.562121357 | -5.460934982 |
| 1426102_at   | 0.04197148   | 3.797233543 | 0.600871824  | 0.562126322 | 0.562126322 | -5.460939312 |
| 1434772_at   | 0.061491445  | 4.819806999 | 0.600860869  | 0.562133319 | 0.562133319 | -5.460945414 |
| 1429785_at   | 0.038033929  | 3.743646773 | 0.600859231  | 0.562134365 | 0.562134365 | -5.460946326 |
| 1458149_at   | 0.055278174  | 4.668320508 | 0.600856053  | 0.562136396 | 0.562136396 | -5.460948096 |
| 1429189_at   | -0.063193014 | 9.358715516 | -0.600846056 | 0.562142781 | 0.562142781 | -5.460953664 |
| 1440269_at   | 0.040715455  | 6.434344783 | 0.600819644  | 0.562159651 | 0.562159651 | -5.460968375 |
| 1434135_at   | 0.048053137  | 7.960457364 | 0.600801886  | 0.562170993 | 0.562170993 | -5.460978265 |
| 1428286_at   | 0.041263473  | 11.89493074 | 0.600770753  | 0.562190879 | 0.562190879 | -5.460995604 |
| 1430462_at   | -0.049338757 | 3.331622023 | -0.600739546 | 0.562210813 | 0.562210813 | -5.461012983 |
| 1437665_at   | 0.041945937  | 3.779185005 | 0.600645896  | 0.562270635 | 0.562270635 | -5.461065132 |
| 1425708_at   | -0.059414142 | 3.358319227 | -0.600645519 | 0.562270876 | 0.562270876 | -5.461065342 |
| 1446291_at   | 0.061031869  | 3.724014528 | 0.600628376  | 0.562281827 | 0.562281827 | -5.461074887 |
| 1433780_at   | -0.053167096 | 7.837131675 | -0.600573076 | 0.562317153 | 0.562317153 | -5.461105676 |
| 1423013_at   | -0.063905828 | 6.909573812 | -0.600546674 | 0.56233402  | 0.56233402  | -5.461120375 |
| 1434563_at   | 0.064368683  | 7.283141338 | 0.600531585  | 0.56234366  | 0.56234366  | -5.461128775 |
| 1422309_a_at | -0.061958114 | 5.72685282  | -0.600516553 | 0.562353263 | 0.562353263 | -5.461137144 |
| 1436109_at   | -0.060549249 | 3.428637559 | -0.600472179 | 0.562381612 | 0.562381612 | -5.461161846 |
| 1422455_s_at | 0.054102078  | 8.688373987 | 0.600458675  | 0.562390239 | 0.562390239 | -5.461169363 |
| 1450503_at   | 0.082692403  | 3.574144455 | 0.600426052  | 0.562411082 | 0.562411082 | -5.461187522 |
| 1458939_at   | 0.061650908  | 4.525071972 | 0.600411443  | 0.562420415 | 0.562420415 | -5.461195653 |
| 1457151_at   | -0.06061118  | 3.796064242 | -0.600397584 | 0.56242927  | 0.56242927  | -5.461203367 |
| 1441312_at   | 0.041168534  | 3.688245325 | 0.60034951   | 0.562459985 | 0.562459985 | -5.461230124 |
| 1446247_at   | -0.124413237 | 6.258980801 | -0.60033562  | 0.562468859 | 0.562468859 | -5.461237854 |
| 1447530_at   | -0.054077738 | 7.265465742 | -0.600314625 | 0.562482273 | 0.562482273 | -5.461249539 |
| 1430736_at   | 0.046265286  | 5.627078512 | 0.600254673  | 0.56252058  | 0.56252058  | -5.461282902 |
| 1445088_at   | 0.062240538  | 3.969319757 | 0.600249496  | 0.562523888 | 0.562523888 | -5.461285783 |
| 1427056_at   | 0.052946558  | 7.108046977 | 0.600245634  | 0.562526356 | 0.562526356 | -5.461287932 |
| 1417004_at   | 0.03843792   | 9.98545667  | 0.600237056  | 0.562531837 | 0.562531837 | -5.461292705 |
| 1434758_at   | 0.061412015  | 7.883544978 | 0.600221618  | 0.562541701 | 0.562541701 | -5.461301296 |
| 1458152_at   | -0.049311525 | 3.285753079 | -0.600213711 | 0.562546753 | 0.562546753 | -5.461305695 |
| 1453647_at   | -0.058454817 | 3.899878451 | -0.600193833 | 0.562559455 | 0.562559455 | -5.461316757 |
| 1430040_at   | -0.043942827 | 5.218829687 | -0.600166732 | 0.562576773 | 0.562576773 | -5.461331836 |
| 1423021_s_at | -0.047346864 | 7.840362872 | -0.600143361 | 0.562591707 | 0.562591707 | -5.461344839 |

|              |              |             |              |             |             |              |
|--------------|--------------|-------------|--------------|-------------|-------------|--------------|
| 1434334_at   | 0.058619584  | 7.385188799 | 0.600135304  | 0.562596855 | 0.562596855 | -5.461349322 |
| 1418672_at   | 0.053512638  | 3.869535731 | 0.600125314  | 0.562603239 | 0.562603239 | -5.46135488  |
| 1425321_a_at | -0.047536114 | 4.602028214 | -0.600117118 | 0.562608476 | 0.562608476 | -5.46135944  |
| 1421569_at   | -0.08831691  | 4.733518039 | -0.60011032  | 0.56261282  | 0.56261282  | -5.461363222 |
| 1415840_at   | -0.045651261 | 9.993404465 | -0.600082679 | 0.562630483 | 0.562630483 | -5.461378599 |
| 1434762_at   | 0.081085001  | 6.774079301 | 0.600069916  | 0.562638639 | 0.562638639 | -5.4613857   |
| 1442807_at   | -0.049031574 | 4.462621619 | -0.600038745 | 0.562658559 | 0.562658559 | -5.46140304  |
| 1451754_a_at | 0.036309885  | 8.041908301 | 0.599977058  | 0.562697981 | 0.562697981 | -5.461437355 |
| 1443089_at   | 0.043075021  | 3.776407116 | 0.599916489  | 0.56273669  | 0.56273669  | -5.461471044 |
| 1422242_at   | 0.04102342   | 7.608208094 | 0.599910322  | 0.562740631 | 0.562740631 | -5.461474474 |
| 1427850_x_at | 0.046437393  | 3.402431198 | 0.599901134  | 0.562746503 | 0.562746503 | -5.461479584 |
| 1457810_at   | -0.04879532  | 3.833765937 | -0.5998977   | 0.562748698 | 0.562748698 | -5.461481494 |
| 1427294_a_at | -0.068917474 | 10.283402   | -0.599807657 | 0.562806246 | 0.562806246 | -5.46153157  |
| 1433444_at   | 0.078315023  | 11.2111264  | 0.599750496  | 0.562842781 | 0.562842781 | -5.461563355 |
| 1439248_at   | 0.050446535  | 4.813004384 | 0.599671525  | 0.562893258 | 0.562893258 | -5.461607264 |
| 1457641_at   | 0.04569925   | 6.279298087 | 0.599667673  | 0.56289572  | 0.56289572  | -5.461609406 |
| 1443752_at   | -0.048909946 | 6.924374607 | -0.599658893 | 0.562901333 | 0.562901333 | -5.461614287 |
| 1452602_a_at | 0.04585591   | 4.319004492 | 0.599654646  | 0.562904047 | 0.562904047 | -5.461616648 |
| 1432604_at   | 0.054376041  | 5.073310133 | 0.599643435  | 0.562911214 | 0.562911214 | -5.461622881 |
| 1427676_a_at | -0.16494532  | 4.320296095 | -0.599593659 | 0.562943031 | 0.562943031 | -5.461650553 |
| 1432417_a_at | -0.055426067 | 6.083782108 | -0.599560706 | 0.562964096 | 0.562964096 | -5.461668871 |
| 1449954_at   | 0.048989418  | 7.468734187 | 0.599553418  | 0.562968755 | 0.562968755 | -5.461672923 |
| 1432721_at   | 0.053390564  | 3.766051386 | 0.599551466  | 0.562970003 | 0.562970003 | -5.461674008 |
| 1441417_at   | 0.083092302  | 4.17772008  | 0.599544163  | 0.562974671 | 0.562974671 | -5.461678067 |
| 1449701_at   | -0.040563692 | 4.229844897 | -0.599540152 | 0.562977235 | 0.562977235 | -5.461680297 |
| 1458578_at   | -0.058005942 | 7.773986774 | -0.599505238 | 0.562999554 | 0.562999554 | -5.461699704 |
| 1425596_at   | -0.043647858 | 3.482707966 | -0.59945657  | 0.563030667 | 0.563030667 | -5.461726755 |
| 1440948_at   | -0.043116368 | 8.276264599 | -0.599422147 | 0.563052673 | 0.563052673 | -5.461745886 |
| 1458091_at   | -0.050689963 | 3.232194019 | -0.599413371 | 0.563058284 | 0.563058284 | -5.461750764 |
| 1436761_s_at | 0.081458973  | 5.797884652 | 0.59937136   | 0.563085142 | 0.563085142 | -5.461774111 |
| 1452507_at   | -0.069648943 | 4.668485878 | -0.599370543 | 0.563085664 | 0.563085664 | -5.461774565 |
| 1427323_s_at | 0.061461736  | 7.38294812  | 0.599329562  | 0.563111865 | 0.563111865 | -5.461797338 |
| 1457071_x_at | 0.041235036  | 4.03227449  | 0.599305398  | 0.563127313 | 0.563127313 | -5.461810765 |
| 1437886_at   | -0.049363967 | 6.997984238 | -0.599271434 | 0.563149029 | 0.563149029 | -5.461829638 |
| 1457409_at   | -0.069167481 | 4.003431674 | -0.599262657 | 0.563154641 | 0.563154641 | -5.461834515 |
| 1426051_a_at | -0.042943958 | 7.396190321 | -0.599260139 | 0.563156251 | 0.563156251 | -5.461835914 |
| 1448577_x_at | 0.046261706  | 8.080572012 | 0.599254867  | 0.563159621 | 0.563159621 | -5.461838843 |
| 1444677_at   | 0.065503557  | 7.703517526 | 0.599227582  | 0.563177066 | 0.563177066 | -5.461854003 |
| 1430223_at   | -0.042197474 | 4.177338462 | -0.599221281 | 0.563181095 | 0.563181095 | -5.461857504 |
| 1437951_at   | 0.047005256  | 7.313815041 | 0.599209157  | 0.563188847 | 0.563188847 | -5.461864239 |
| 1430079_at   | -0.053205061 | 3.772400041 | -0.599191686 | 0.563200018 | 0.563200018 | -5.461873946 |
| 1424155_at   | -0.051948391 | 3.858633328 | -0.599175842 | 0.563210149 | 0.563210149 | -5.461882748 |
| 1439467_at   | 0.050997743  | 7.745661536 | 0.599138111  | 0.563234274 | 0.563234274 | -5.461903709 |
| 1418089_at   | 0.047276474  | 8.373553572 | 0.59910419   | 0.563255964 | 0.563255964 | -5.461922553 |
| 1433812_at   | -0.077643648 | 8.238079298 | -0.599028085 | 0.563304629 | 0.563304629 | -5.461964826 |
| 1420242_at   | 0.043907542  | 3.838694358 | 0.59899803   | 0.563323849 | 0.563323849 | -5.46198152  |
| 1438882_at   | -0.06438324  | 6.917324074 | -0.598984564 | 0.563332459 | 0.563332459 | -5.461988999 |
| 1457262_at   | 0.098134104  | 8.986695333 | 0.598979599  | 0.563335634 | 0.563335634 | -5.461991756 |
| 1441621_at   | -0.045290929 | 4.259574651 | -0.598925149 | 0.563370455 | 0.563370455 | -5.462021996 |
| 1453849_s_at | 0.044231463  | 11.73344535 | 0.598922636  | 0.563372062 | 0.563372062 | -5.462023391 |
| 1439360_x_at | -0.047143346 | 10.12432098 | -0.598850245 | 0.563418358 | 0.563418358 | -5.462063591 |
| 1432042_a_at | 0.03966331   | 10.05107536 | 0.598836606  | 0.56342708  | 0.56342708  | -5.462071164 |
| 1425356_at   | -0.080328013 | 6.205132669 | -0.598819786 | 0.563437837 | 0.563437837 | -5.462080504 |

|              |              |             |              |             |             |              |
|--------------|--------------|-------------|--------------|-------------|-------------|--------------|
| 1457303_at   | -0.038813851 | 6.653138883 | -0.598810575 | 0.563443728 | 0.563443728 | -5.462085618 |
| 1416604_at   | 0.038499468  | 11.24807292 | 0.598780749  | 0.563462804 | 0.563462804 | -5.462102179 |
| 1425184_at   | -0.050999132 | 4.416800621 | -0.598772861 | 0.563467849 | 0.563467849 | -5.462106558 |
| 1451418_a_at | -0.068619392 | 5.813917218 | -0.598771279 | 0.56346886  | 0.56346886  | -5.462107437 |
| 1453089_at   | -0.062734661 | 4.596027242 | -0.598752629 | 0.563480788 | 0.563480788 | -5.462117791 |
| 1421817_at   | -0.060044961 | 7.975570288 | -0.598728438 | 0.56349626  | 0.56349626  | -5.462131221 |
| 1448760_at   | -0.098056447 | 8.194926937 | -0.598648915 | 0.563547123 | 0.563547123 | -5.462175368 |
| 1431383_at   | 0.051207022  | 4.001350001 | 0.598614022  | 0.563569441 | 0.563569441 | -5.462194737 |
| 1422260_x_at | 0.046872707  | 3.626886889 | 0.598613681  | 0.56356966  | 0.56356966  | -5.462194926 |
| 1459002_at   | -0.043331371 | 3.450090367 | -0.598602812 | 0.563576612 | 0.563576612 | -5.462200959 |
| 1446365_at   | 0.058067103  | 6.67698376  | 0.598601401  | 0.563577514 | 0.563577514 | -5.462201742 |
| 1458638_at   | -0.066892192 | 5.537059708 | -0.598537408 | 0.563618447 | 0.563618447 | -5.462237261 |
| 1442996_x_at | 0.070568021  | 3.691788759 | 0.598508471  | 0.563636957 | 0.563636957 | -5.462253321 |
| 1440149_at   | 0.042956144  | 3.523261129 | 0.598436528  | 0.563682979 | 0.563682979 | -5.462293247 |
| 1435618_at   | -0.0887918   | 4.921586487 | -0.598433991 | 0.563684602 | 0.563684602 | -5.462294655 |
| 1451573_a_at | -0.039768561 | 8.362153551 | -0.598381467 | 0.563718202 | 0.563718202 | -5.4623238   |
| 1456152_at   | -0.054585445 | 3.6524815   | -0.598377021 | 0.563721046 | 0.563721046 | -5.462326268 |
| 1423305_at   | -0.068770123 | 4.597340342 | -0.598366106 | 0.563728029 | 0.563728029 | -5.462332324 |
| 1442573_at   | -0.068996413 | 4.836402984 | -0.598334036 | 0.563748546 | 0.563748546 | -5.462350118 |
| 1441352_at   | -0.062538854 | 5.095524172 | -0.59829936  | 0.563770729 | 0.563770729 | -5.462369357 |
| 1428054_at   | -0.057479032 | 5.513528747 | -0.598287797 | 0.563778127 | 0.563778127 | -5.462375772 |
| 1434157_at   | 0.047883503  | 8.874047033 | 0.598246857  | 0.563804319 | 0.563804319 | -5.462398485 |
| 1425692_a_at | -0.044932983 | 3.929518182 | -0.59823588  | 0.563811342 | 0.563811342 | -5.462404575 |
| 1452175_at   | -0.040863275 | 7.534156861 | -0.598206493 | 0.563830143 | 0.563830143 | -5.462420877 |
| 1426126_a_at | -0.037550559 | 7.062333179 | -0.598182791 | 0.563845308 | 0.563845308 | -5.462434025 |
| 1448056_at   | 0.073436595  | 6.63152841  | 0.598171154  | 0.563852754 | 0.563852754 | -5.46244048  |
| 1445756_at   | 0.04405457   | 4.450127885 | 0.598133426  | 0.563876893 | 0.563876893 | -5.462461407 |
| 1434417_at   | -0.059221435 | 7.779320093 | -0.598122942 | 0.563883601 | 0.563883601 | -5.462467223 |
| 1430319_at   | -0.050724572 | 3.645303593 | -0.598027366 | 0.563944755 | 0.563944755 | -5.462520231 |
| 1429459_at   | 0.085803779  | 9.379491951 | 0.597969413  | 0.563981838 | 0.563981838 | -5.462552369 |
| 1432749_at   | 0.042173937  | 5.964625372 | 0.597936215  | 0.564003081 | 0.564003081 | -5.462570778 |
| 1433109_at   | -0.039823798 | 3.993946299 | -0.597932679 | 0.564005344 | 0.564005344 | -5.462572739 |
| 1428364_at   | -0.079374637 | 7.976597956 | -0.597915009 | 0.564016652 | 0.564016652 | -5.462582537 |
| 1436573_at   | -0.043879634 | 6.510127005 | -0.59788649  | 0.564034902 | 0.564034902 | -5.46259835  |
| 1416641_at   | 0.062455672  | 9.97057753  | 0.597819644  | 0.564077679 | 0.564077679 | -5.462635411 |
| 1444536_at   | -0.079595424 | 4.882429415 | -0.597807647 | 0.564085357 | 0.564085357 | -5.462642062 |
| 1422517_a_at | 0.038827153  | 9.395471071 | 0.597799145  | 0.564090798 | 0.564090798 | -5.462646776 |
| 1445051_at   | 0.037412098  | 3.402561005 | 0.597730033  | 0.564135027 | 0.564135027 | -5.462685088 |
| 1433322_at   | -0.051144736 | 3.768935605 | -0.597697442 | 0.564155886 | 0.564155886 | -5.462703154 |
| 1419607_at   | -0.071498356 | 5.608325628 | -0.597696534 | 0.564156467 | 0.564156467 | -5.462703657 |
| 1423231_at   | -0.063845377 | 7.256164833 | -0.597663472 | 0.564177627 | 0.564177627 | -5.462721983 |
| 1437534_at   | 0.081218244  | 3.721942388 | 0.597659682  | 0.564180052 | 0.564180052 | -5.462724084 |
| 1458048_at   | 0.041677777  | 5.870956499 | 0.597527785  | 0.564264473 | 0.564264473 | -5.462797182 |
| 1423218_a_at | 0.040674532  | 8.416165158 | 0.597496288  | 0.564284633 | 0.564284633 | -5.462814636 |
| 1434363_x_at | -0.048384217 | 7.931440152 | -0.597396384 | 0.564348583 | 0.564348583 | -5.462869992 |
| 1425631_at   | -0.050684157 | 6.390997353 | -0.597363794 | 0.564369445 | 0.564369445 | -5.462888048 |
| 1460409_at   | 0.041594254  | 8.428537274 | 0.597350817  | 0.564377752 | 0.564377752 | -5.462895237 |
| 1460183_at   | 0.061236197  | 4.662871139 | 0.597315946  | 0.564400074 | 0.564400074 | -5.462914555 |
| 1433165_at   | 0.0507532    | 3.622130452 | 0.597292565  | 0.564415042 | 0.564415042 | -5.462927507 |
| 1417055_at   | 0.051154642  | 10.88659998 | 0.597189494  | 0.564481028 | 0.564481028 | -5.4629846   |
| 1449528_at   | 0.120546786  | 6.611616601 | 0.597153316  | 0.564504189 | 0.564504189 | -5.463004637 |
| 1446215_at   | 0.066122189  | 3.901582378 | 0.596994085  | 0.564606139 | 0.564606139 | -5.463092814 |
| 1426618_a_at | 0.041017767  | 8.572392544 | 0.596948015  | 0.564635637 | 0.564635637 | -5.463118322 |

|              |              |             |              |             |             |              |
|--------------|--------------|-------------|--------------|-------------|-------------|--------------|
| 1432466_a_at | 0.099486086  | 8.977231174 | 0.596947172  | 0.564636177 | 0.564636177 | -5.463118789 |
| 1437377_a_at | -0.049671065 | 8.092064144 | -0.59686407  | 0.564689389 | 0.564689389 | -5.463164796 |
| 1446865_at   | 0.045307456  | 3.487320011 | 0.596827048  | 0.564713097 | 0.564713097 | -5.463185291 |
| 1438097_at   | 0.055692012  | 3.376160566 | 0.596821348  | 0.564716747 | 0.564716747 | -5.463188446 |
| 1420994_at   | 0.040321119  | 8.585406694 | 0.596723335  | 0.564779512 | 0.564779512 | -5.463242697 |
| 1449474_a_at | 0.043542475  | 7.646132097 | 0.596708721  | 0.564788871 | 0.564788871 | -5.463250786 |
| 1421146_at   | 0.076364982  | 6.451083081 | 0.596635712  | 0.564835627 | 0.564835627 | -5.46329119  |
| 1425248_a_at | 0.124109039  | 6.461716296 | 0.596602971  | 0.564856596 | 0.564856596 | -5.463309309 |
| 1448118_a_at | 0.041636708  | 9.989276916 | 0.596535037  | 0.564900106 | 0.564900106 | -5.463346899 |
| 1446053_at   | 0.049959675  | 4.962181197 | 0.59653472   | 0.564900309 | 0.564900309 | -5.463347075 |
| 1423673_at   | 0.040346088  | 8.014645161 | 0.59643455   | 0.564964468 | 0.564964468 | -5.463402496 |
| 1449174_at   | 0.048674913  | 4.276040724 | 0.596369065  | 0.565006413 | 0.565006413 | -5.463438722 |
| 1433960_at   | 0.047891084  | 9.274302848 | 0.596361958  | 0.565010965 | 0.565010965 | -5.463442653 |
| 1421490_at   | -0.048994263 | 3.381208481 | -0.596332458 | 0.565029862 | 0.565029862 | -5.463458971 |
| 1436397_at   | -0.047649117 | 4.006956649 | -0.596292106 | 0.56505571  | 0.56505571  | -5.463481291 |
| 1448425_at   | -0.046430746 | 12.07622505 | -0.596278484 | 0.565064436 | 0.565064436 | -5.463488825 |
| 1459270_at   | -0.04130381  | 6.487196861 | -0.596248945 | 0.565083358 | 0.565083358 | -5.463505162 |
| 1440587_at   | -0.07654238  | 6.956079655 | -0.596188154 | 0.565122301 | 0.565122301 | -5.463538782 |
| 1425029_a_at | -0.080185919 | 8.702086442 | -0.596054775 | 0.56520775  | 0.56520775  | -5.463612535 |
| 1429894_a_at | 0.059930015  | 4.026484072 | 0.596051789  | 0.565209663 | 0.565209663 | -5.463614186 |
| 1432800_at   | -0.049446392 | 4.098688926 | -0.595968204 | 0.565263215 | 0.565263215 | -5.463660397 |
| 1419815_at   | 0.041717564  | 6.963411624 | 0.595894031  | 0.56531074  | 0.56531074  | -5.4637014   |
| 1435981_at   | 0.077213008  | 7.07287883  | 0.595887844  | 0.565314704 | 0.565314704 | -5.46370482  |
| 1430195_at   | 0.049645279  | 8.417763719 | 0.595881909  | 0.565318507 | 0.565318507 | -5.4637081   |
| 1433064_at   | 0.045877238  | 3.916413227 | 0.595838923  | 0.565346051 | 0.565346051 | -5.46373186  |
| 1458477_at   | -0.043392801 | 3.973023447 | -0.595822791 | 0.565356387 | 0.565356387 | -5.463740776 |
| 1437833_at   | -0.114237928 | 6.270566238 | -0.595794997 | 0.565374197 | 0.565374197 | -5.463756138 |
| 1431320_a_at | -0.04254638  | 7.718162513 | -0.59577629  | 0.565386184 | 0.565386184 | -5.463766477 |
| 1432001_at   | -0.073136758 | 7.117916568 | -0.595757727 | 0.565398079 | 0.565398079 | -5.463776736 |
| 1422300_at   | -0.04987937  | 5.073079087 | -0.595716349 | 0.565424595 | 0.565424595 | -5.463799603 |
| 1432334_at   | -0.051658173 | 3.215386846 | -0.595702803 | 0.565433275 | 0.565433275 | -5.463807089 |
| 1451075_s_at | 0.039151268  | 11.93059678 | 0.595696702  | 0.565437185 | 0.565437185 | -5.46381046  |
| 1458006_at   | -0.05148995  | 6.005806492 | -0.595675561 | 0.565450732 | 0.565450732 | -5.463822142 |
| 1445290_at   | 0.193268643  | 6.362877099 | 0.595659203  | 0.565461215 | 0.565461215 | -5.463831181 |
| 1430503_at   | -0.043601878 | 6.779301285 | -0.595657369 | 0.56546239  | 0.56546239  | -5.463832194 |
| 1433320_at   | -0.079346225 | 4.518813617 | -0.595575289 | 0.565514991 | 0.565514991 | -5.463877546 |
| 1432568_at   | -0.05647392  | 3.866338529 | -0.59555661  | 0.565526962 | 0.565526962 | -5.463887866 |
| 1429707_at   | 0.038170599  | 9.123752051 | 0.595523177  | 0.565548389 | 0.565548389 | -5.463906336 |
| 1460526_at   | -0.045015725 | 4.272325692 | -0.59551683  | 0.565552457 | 0.565552457 | -5.463909843 |
| 1425174_at   | 0.047750286  | 4.405395071 | 0.595512251  | 0.565555391 | 0.565555391 | -5.463912372 |
| 1443744_at   | 0.105791431  | 7.006403077 | 0.59550754   | 0.565558411 | 0.565558411 | -5.463914975 |
| 1451830_a_at | -0.058332184 | 7.154072462 | -0.595488585 | 0.565570559 | 0.565570559 | -5.463925446 |
| 1428104_at   | 0.03793243   | 9.297708065 | 0.595393204  | 0.565631691 | 0.565631691 | -5.463978133 |
| 1448182_a_at | 0.069934326  | 11.71092729 | 0.595376974  | 0.565642093 | 0.565642093 | -5.463987097 |
| 1437504_at   | -0.041690985 | 4.016611784 | -0.595361553 | 0.565651977 | 0.565651977 | -5.463995614 |
| 1449335_at   | -0.045177701 | 9.312495877 | -0.595288954 | 0.565698511 | 0.565698511 | -5.464035709 |
| 1421716_at   | -0.054805271 | 5.180012186 | -0.595220704 | 0.565742259 | 0.565742259 | -5.464073398 |
| 1423638_at   | 0.042423764  | 5.109007846 | 0.595202266  | 0.565754078 | 0.565754078 | -5.464083579 |
| 1439207_at   | -0.04491926  | 4.252516339 | -0.59518672  | 0.565764044 | 0.565764044 | -5.464092164 |
| 1426114_at   | 0.082477513  | 11.70382329 | 0.595178459  | 0.565769339 | 0.565769339 | -5.464096725 |
| 1431375_s_at | -0.047853742 | 9.59087719  | -0.595108369 | 0.56581427  | 0.56581427  | -5.464135423 |
| 1436510_a_at | -0.041622539 | 7.619458266 | -0.595089958 | 0.565826073 | 0.565826073 | -5.464145588 |
| 1450659_at   | 0.047270035  | 4.202233185 | 0.595078873  | 0.565833179 | 0.565833179 | -5.464151707 |

|              |              |             |              |             |             |              |
|--------------|--------------|-------------|--------------|-------------|-------------|--------------|
| 1425196_a_at | -0.050978029 | 7.50998947  | -0.595019787 | 0.565871058 | 0.565871058 | -5.464184326 |
| 1451615_at   | 0.049524249  | 5.422013746 | 0.594974233  | 0.565900263 | 0.565900263 | -5.464209471 |
| 1445617_at   | 0.088954707  | 5.563732375 | 0.594927533  | 0.565930203 | 0.565930203 | -5.464235248 |
| 1417042_at   | 0.049148637  | 7.839153409 | 0.59487479   | 0.56596402  | 0.56596402  | -5.464264358 |
| 1415786_at   | 0.047328774  | 4.793981924 | 0.594856186  | 0.565975948 | 0.565975948 | -5.464274625 |
| 1447221_x_at | -0.037413968 | 3.102236538 | -0.594834595 | 0.565989791 | 0.565989791 | -5.464286541 |
| 1457703_at   | 0.044931268  | 4.543113609 | 0.594774536  | 0.566028299 | 0.566028299 | -5.464319683 |
| 1425135_a_at | -0.040306423 | 7.292822242 | -0.594734278 | 0.566054113 | 0.566054113 | -5.464341898 |
| 1460645_at   | 0.037595996  | 9.939023236 | 0.5946107    | 0.566133355 | 0.566133355 | -5.464410078 |
| 1436783_x_at | 0.050547503  | 12.07209855 | 0.594589139  | 0.566147182 | 0.566147182 | -5.464421973 |
| 1422936_at   | -0.044906494 | 3.378649005 | -0.594586046 | 0.566149166 | 0.566149166 | -5.464423679 |
| 1455823_at   | 0.041853493  | 7.33377524  | 0.594519829  | 0.566191629 | 0.566191629 | -5.464460206 |
| 1445919_at   | 0.056628464  | 5.967273918 | 0.594508662  | 0.566198791 | 0.566198791 | -5.464466366 |
| 1422786_at   | 0.044425877  | 5.712556146 | 0.594469046  | 0.566224197 | 0.566224197 | -5.464488217 |
| 1447369_at   | -0.063105895 | 6.013423135 | -0.594442801 | 0.566241029 | 0.566241029 | -5.464502692 |
| 1433255_at   | 0.048924117  | 6.417226362 | 0.594435018  | 0.56624602  | 0.56624602  | -5.464506984 |
| 1417120_at   | -0.058037381 | 7.063033286 | -0.594425798 | 0.566251933 | 0.566251933 | -5.464512069 |
| 1430568_at   | 0.054704608  | 7.242184842 | 0.594408169  | 0.566263239 | 0.566263239 | -5.464521792 |
| 1420938_at   | 0.043760261  | 7.21931845  | 0.594399745  | 0.566268642 | 0.566268642 | -5.464526438 |
| 1460367_at   | 0.042566779  | 10.06398943 | 0.594288443  | 0.566340028 | 0.566340028 | -5.464587815 |
| 1419901_at   | 0.037474313  | 5.694668939 | 0.594278389  | 0.566346476 | 0.566346476 | -5.464593358 |
| 1437896_at   | -0.043462923 | 6.800658027 | -0.594255282 | 0.566361297 | 0.566361297 | -5.464606099 |
| 1424492_at   | -0.048726017 | 7.572967109 | -0.59421299  | 0.566388424 | 0.566388424 | -5.464629417 |
| 1446124_at   | 0.042641722  | 4.135898748 | 0.59420376   | 0.566394344 | 0.566394344 | -5.464634505 |
| 1451395_at   | -0.041112098 | 6.746151556 | -0.594187853 | 0.566404548 | 0.566404548 | -5.464643275 |
| 1443926_at   | -0.071584521 | 7.69911171  | -0.594159312 | 0.566422855 | 0.566422855 | -5.46465901  |
| 1427196_at   | -0.061763908 | 5.712905964 | -0.594154335 | 0.566426048 | 0.566426048 | -5.464661754 |
| 1455761_at   | 0.050315907  | 5.17670662  | 0.594080389  | 0.566473481 | 0.566473481 | -5.464702516 |
| 1425072_at   | -0.05120907  | 7.444624047 | -0.594045294 | 0.566495994 | 0.566495994 | -5.464721861 |
| 1442473_at   | 0.058360789  | 7.349851928 | 0.594042174  | 0.566497995 | 0.566497995 | -5.46472358  |
| 1433468_at   | 0.097088841  | 7.586963006 | 0.594037996  | 0.566500676 | 0.566500676 | -5.464725884 |
| 1418784_at   | -0.059812232 | 8.019312498 | -0.594023342 | 0.566510076 | 0.566510076 | -5.46473396  |
| 1425607_at   | 0.050315386  | 7.220756398 | 0.594004135  | 0.566522397 | 0.566522397 | -5.464744547 |
| 1430642_at   | 0.064514063  | 3.909987797 | 0.593998409  | 0.566526071 | 0.566526071 | -5.464747702 |
| 1433155_at   | -0.054607155 | 3.647008755 | -0.593976173 | 0.566540335 | 0.566540335 | -5.464759957 |
| 1459296_at   | 0.040918516  | 4.977847158 | 0.593940176  | 0.566563429 | 0.566563429 | -5.464779796 |
| 1442135_at   | 0.03820862   | 7.346925574 | 0.593869555  | 0.566608735 | 0.566608735 | -5.464818713 |
| 1429311_at   | 0.04790493   | 9.115103834 | 0.593781681  | 0.566665114 | 0.566665114 | -5.464867132 |
| 1454490_at   | -0.062284517 | 3.633830996 | -0.593742952 | 0.566689962 | 0.566689962 | -5.46488847  |
| 1437023_at   | 0.0376126    | 7.897635939 | 0.593712152  | 0.566709724 | 0.566709724 | -5.464905438 |
| 1452499_a_at | 0.048850472  | 7.778243244 | 0.593701556  | 0.566716523 | 0.566716523 | -5.464911276 |
| 1455045_at   | 0.042292073  | 7.749620149 | 0.593647437  | 0.566751248 | 0.566751248 | -5.464941088 |
| 1417776_at   | -0.049316026 | 5.585990444 | -0.593610785 | 0.566774766 | 0.566774766 | -5.464961277 |
| 1456198_at   | 0.04086818   | 3.181480215 | 0.593600545  | 0.566781336 | 0.566781336 | -5.464966918 |
| 1453976_at   | 0.042515163  | 7.19997107  | 0.593599064  | 0.566782287 | 0.566782287 | -5.464967734 |
| 1426266_s_at | 0.050956765  | 7.725369629 | 0.593485997  | 0.566854842 | 0.566854842 | -5.465030007 |
| 1441089_at   | -0.049760707 | 6.528256297 | -0.593450784 | 0.566877439 | 0.566877439 | -5.465049398 |
| 1447731_at   | 0.044122018  | 3.142083801 | 0.593348869  | 0.566942843 | 0.566942843 | -5.465105517 |
| 1416117_at   | -0.066368239 | 5.838595363 | -0.593179571 | 0.5670515   | 0.5670515   | -5.46519872  |
| 1418874_a_at | 0.042788044  | 10.86100047 | 0.5931628    | 0.567062264 | 0.567062264 | -5.465207951 |
| 1440957_at   | -0.048859416 | 3.411826173 | -0.593154766 | 0.567067421 | 0.567067421 | -5.465212373 |
| 1420238_at   | 0.085808333  | 4.779815385 | 0.59314108   | 0.567076205 | 0.567076205 | -5.465219906 |
| 1445939_at   | 0.050484496  | 3.28879466  | 0.593101921  | 0.56710134  | 0.56710134  | -5.46524146  |



|              |              |             |              |             |             |              |
|--------------|--------------|-------------|--------------|-------------|-------------|--------------|
| 1436946_s_at | 0.081695063  | 11.67753043 | 0.59309      | 0.567108992 | 0.567108992 | -5.46524802  |
| 1435791_x_at | 0.038945177  | 13.24798168 | 0.593064897  | 0.567125105 | 0.567125105 | -5.465261836 |
| 1428971_at   | -0.039194927 | 10.02436386 | -0.592948541 | 0.567199795 | 0.567199795 | -5.465325867 |
| 1450197_at   | -0.073275235 | 4.094454992 | -0.592930653 | 0.567211279 | 0.567211279 | -5.465335711 |
| 1445174_at   | 0.054888353  | 3.067840104 | 0.592928944  | 0.567212376 | 0.567212376 | -5.465336651 |
| 1434656_at   | 0.036690303  | 8.400454279 | 0.592909194  | 0.567225055 | 0.567225055 | -5.465347518 |
| 1458337_at   | -0.069360232 | 5.162959347 | -0.592884629 | 0.567240824 | 0.567240824 | -5.465361034 |
| 1450013_at   | 0.045588033  | 7.570477127 | 0.592811164  | 0.567287987 | 0.567287987 | -5.465401452 |
| 1421328_at   | 0.039773809  | 4.535347837 | 0.592789452  | 0.567301926 | 0.567301926 | -5.465413397 |
| 1427101_at   | -0.048335926 | 5.377396387 | -0.592752917 | 0.567325382 | 0.567325382 | -5.465433495 |
| 1434713_at   | 0.056693384  | 7.939603561 | 0.592748139  | 0.567328449 | 0.567328449 | -5.465436123 |
| 1452717_at   | 0.044190313  | 10.44840783 | 0.592670804  | 0.567378101 | 0.567378101 | -5.465478661 |
| 1426686_s_at | 0.050148331  | 8.622140393 | 0.592670145  | 0.567378524 | 0.567378524 | -5.465479024 |
| 1418441_at   | 0.071870663  | 7.898248287 | 0.592618238  | 0.567411852 | 0.567411852 | -5.465507572 |
| 1449444_a_at | -0.05286332  | 9.136653353 | -0.592613272 | 0.56741504  | 0.56741504  | -5.465510303 |
| 1428140_at   | -0.04809707  | 10.86171748 | -0.592605857 | 0.567419801 | 0.567419801 | -5.465514381 |
| 1432791_at   | -0.046306847 | 3.54710365  | -0.592594659 | 0.567426991 | 0.567426991 | -5.46552054  |
| 1439515_at   | 0.050863328  | 6.930175506 | 0.592569068  | 0.567443423 | 0.567443423 | -5.465534614 |
| 1436550_at   | -0.048656795 | 7.819532648 | -0.592509019 | 0.56748198  | 0.56748198  | -5.465567634 |
| 1442062_at   | 0.040722193  | 8.316393211 | 0.592474755  | 0.567503982 | 0.567503982 | -5.465586475 |
| 1434298_at   | 0.124362499  | 6.63105515  | 0.592410334  | 0.56754535  | 0.56754535  | -5.465621896 |
| 1434937_at   | -0.039514949 | 10.41551536 | -0.592376296 | 0.567567207 | 0.567567207 | -5.465640609 |
| 1455654_at   | 0.04306669   | 6.516230016 | 0.592355697  | 0.567580435 | 0.567580435 | -5.465651933 |
| 1455962_at   | 0.049579185  | 6.039704724 | 0.592271041  | 0.567634801 | 0.567634801 | -5.46569847  |
| 1460564_at   | -0.035951654 | 8.198448424 | -0.592262865 | 0.567640052 | 0.567640052 | -5.465702964 |
| 1431902_at   | -0.06124252  | 3.568178419 | -0.592246599 | 0.567650498 | 0.567650498 | -5.465711905 |
| 1454022_at   | 0.050979938  | 7.529360148 | 0.592241296  | 0.567653904 | 0.567653904 | -5.46571482  |
| 1443895_at   | -0.057513869 | 4.967652949 | -0.592198798 | 0.567681197 | 0.567681197 | -5.465738178 |
| 1444859_at   | -0.041405675 | 3.091797507 | -0.592177705 | 0.567694744 | 0.567694744 | -5.465749771 |
| 1445677_x_at | -0.050888487 | 3.561118202 | -0.592141151 | 0.567718221 | 0.567718221 | -5.46576986  |
| 1416963_at   | 0.035305361  | 9.882318473 | 0.592120964  | 0.567731186 | 0.567731186 | -5.465780954 |
| 1435667_at   | -0.041767049 | 5.995737529 | -0.59209535  | 0.567747638 | 0.567747638 | -5.46579503  |
| 1424276_at   | 0.040523826  | 7.619373902 | 0.592066561  | 0.567766129 | 0.567766129 | -5.46581085  |
| 1441575_at   | 0.048722624  | 5.079765363 | 0.592041907  | 0.567781964 | 0.567781964 | -5.465824397 |
| 1454099_at   | -0.05827073  | 4.018824724 | -0.5920413   | 0.567782354 | 0.567782354 | -5.465824731 |
| 1449744_at   | -0.0618219   | 4.56856867  | -0.591983944 | 0.567819195 | 0.567819195 | -5.465856246 |
| 1428128_at   | 0.039847716  | 11.47531992 | 0.591956508  | 0.567836818 | 0.567836818 | -5.46587132  |
| 1452622_a_at | 0.042015607  | 6.797351282 | 0.591937274  | 0.567849173 | 0.567849173 | -5.465881887 |
| 1453422_a_at | -0.054929684 | 6.549945714 | -0.591921416 | 0.567859359 | 0.567859359 | -5.465890599 |
| 1439134_s_at | -0.047500308 | 4.468225148 | -0.591914085 | 0.567864068 | 0.567864068 | -5.465894627 |
| 1426188_s_at | -0.046119605 | 3.701872501 | -0.591910702 | 0.567866241 | 0.567866241 | -5.465896485 |
| 1419888_at   | -0.06360022  | 5.75795556  | -0.591844314 | 0.567908887 | 0.567908887 | -5.465932955 |
| 1442817_at   | 0.040697305  | 3.670574345 | 0.591817014  | 0.567926424 | 0.567926424 | -5.465947951 |
| 1431380_at   | -0.062622964 | 4.201093034 | -0.591776694 | 0.567952326 | 0.567952326 | -5.465970097 |
| 1435294_at   | 0.061545555  | 5.628532334 | 0.591735068  | 0.567979067 | 0.567979067 | -5.46599296  |
| 1440157_at   | -0.053399442 | 3.420543284 | -0.591696564 | 0.568003804 | 0.568003804 | -5.466014106 |
| 1449467_at   | 0.037588315  | 5.352255545 | 0.591655358  | 0.568030277 | 0.568030277 | -5.466036736 |
| 1451915_at   | 0.035547304  | 3.709997482 | 0.591642322  | 0.568038652 | 0.568038652 | -5.466043894 |
| 1416722_at   | 0.046416952  | 10.25566332 | 0.591623635  | 0.568050657 | 0.568050657 | -5.466054156 |
| 1446753_at   | -0.044379689 | 3.072367954 | -0.591622745 | 0.56805123  | 0.56805123  | -5.466054645 |
| 1448370_at   | -0.066243036 | 8.594397429 | -0.591618362 | 0.568054045 | 0.568054045 | -5.466057052 |
| 1437524_x_at | 0.053291143  | 8.654251004 | 0.591603584  | 0.56806354  | 0.56806354  | -5.466065166 |
| 1457425_at   | -0.036261648 | 5.569217503 | -0.591581838 | 0.568077512 | 0.568077512 | -5.466077107 |

|              |              |             |              |             |             |              |
|--------------|--------------|-------------|--------------|-------------|-------------|--------------|
| 1454719_at   | -0.045532887 | 6.877603855 | -0.591580187 | 0.568078572 | 0.568078572 | -5.466078014 |
| 1444471_at   | -0.037734298 | 3.467627081 | -0.591494385 | 0.568133701 | 0.568133701 | -5.466125123 |
| 1453256_at   | -0.046174142 | 7.558237155 | -0.591481672 | 0.568141869 | 0.568141869 | -5.466132103 |
| 1429766_at   | -0.055651606 | 6.179092603 | -0.591470398 | 0.568149113 | 0.568149113 | -5.466138292 |
| 1419516_at   | -0.039191896 | 8.931782204 | -0.591438599 | 0.568169546 | 0.568169546 | -5.46615575  |
| 1419049_at   | 0.051812005  | 5.76179661  | 0.591371151  | 0.568212885 | 0.568212885 | -5.466192774 |
| 1452089_at   | -0.055323684 | 4.729491923 | -0.591316888 | 0.568247754 | 0.568247754 | -5.466222559 |
| 1421334_x_at | -0.047648239 | 7.883380423 | -0.591279218 | 0.568271961 | 0.568271961 | -5.466243234 |
| 1442721_at   | -0.044023565 | 3.943035648 | -0.591075961 | 0.568402585 | 0.568402585 | -5.46635477  |
| 1431475_a_at | 0.035699937  | 3.362505113 | 0.591063477  | 0.568410609 | 0.568410609 | -5.46636162  |
| 1440280_at   | 0.056780052  | 7.37325445  | 0.591044091  | 0.568423068 | 0.568423068 | -5.466372255 |
| 1419833_s_at | -0.110776017 | 7.274343971 | -0.590895608 | 0.568518504 | 0.568518504 | -5.466453709 |
| 1423857_at   | 0.045822469  | 10.56350838 | 0.590813587  | 0.568571225 | 0.568571225 | -5.466498694 |
| 1452232_at   | 0.079954734  | 7.18221554  | 0.590773822  | 0.568596787 | 0.568596787 | -5.466520502 |
| 1454275_at   | -0.05465405  | 3.578757496 | -0.590772748 | 0.568597477 | 0.568597477 | -5.466521091 |
| 1457160_at   | -0.057147078 | 4.195910388 | -0.590673497 | 0.56866128  | 0.56866128  | -5.466575516 |
| 1442446_at   | 0.070381401  | 5.197232462 | 0.590662405  | 0.56866841  | 0.56866841  | -5.466581598 |
| 1453371_at   | 0.051809846  | 7.247807998 | 0.59062954   | 0.568689538 | 0.568689538 | -5.466599618 |
| 1423723_s_at | 0.034910786  | 10.59704336 | 0.590610639  | 0.56870169  | 0.56870169  | -5.466609981 |
| 1460061_at   | 0.058321991  | 4.245067496 | 0.590606998  | 0.56870403  | 0.56870403  | -5.466611977 |
| 1443891_at   | 0.040708367  | 6.026241827 | 0.590590887  | 0.568714388 | 0.568714388 | -5.466620809 |
| 1437856_at   | -0.049834761 | 6.637492915 | -0.590587488 | 0.568716573 | 0.568716573 | -5.466622673 |
| 1438632_x_at | -0.048258567 | 3.359930962 | -0.590467536 | 0.568793692 | 0.568793692 | -5.46668843  |
| 1451005_at   | 0.036288292  | 10.96627313 | 0.590462513  | 0.568796922 | 0.568796922 | -5.466691183 |
| 1415673_at   | 0.045007832  | 7.463013994 | 0.590408407  | 0.56883171  | 0.56883171  | -5.466720839 |
| 1449349_at   | 0.054978685  | 8.773930664 | 0.590388547  | 0.568844479 | 0.568844479 | -5.466731724 |
| 1440242_at   | -0.051949642 | 5.483020703 | -0.59019309  | 0.568970161 | 0.568970161 | -5.466838832 |
| 1421991_a_at | 0.095857355  | 9.38516583  | 0.590151167  | 0.56899712  | 0.56899712  | -5.466861801 |
| 1438985_x_at | 0.047006759  | 4.456779745 | 0.590136823  | 0.569006344 | 0.569006344 | -5.46686966  |
| 1438696_at   | -0.053648474 | 6.296166326 | -0.590124637 | 0.56901418  | 0.56901418  | -5.466876336 |
| 1439478_at   | 0.059548339  | 8.093118104 | 0.590122781  | 0.569015374 | 0.569015374 | -5.466877353 |
| 1456588_x_at | 0.040300202  | 12.79569025 | 0.590067642  | 0.569050834 | 0.569050834 | -5.466907559 |
| 1459859_x_at | 0.060343336  | 9.127080143 | 0.590065804  | 0.569052016 | 0.569052016 | -5.466908566 |
| 1427402_at   | -0.049465963 | 7.156558806 | -0.589922051 | 0.569144468 | 0.569144468 | -5.466987304 |
| 1450246_at   | 0.050133493  | 5.100889571 | 0.589907631  | 0.569153743 | 0.569153743 | -5.466995202 |
| 1421972_s_at | -0.068133817 | 7.927934826 | -0.589869922 | 0.569177996 | 0.569177996 | -5.467015853 |
| 1436220_at   | 0.044640928  | 8.033556928 | 0.58986511   | 0.569181091 | 0.569181091 | -5.467018488 |
| 1447373_at   | -0.049147389 | 3.683441276 | -0.589812921 | 0.569214659 | 0.569214659 | -5.467047067 |
| 1451419_at   | 0.045449746  | 5.038731224 | 0.589810406  | 0.569216277 | 0.569216277 | -5.467048444 |
| 1440450_at   | 0.063321275  | 4.317027236 | 0.589797944  | 0.569224292 | 0.569224292 | -5.467055268 |
| 1428103_at   | 0.05572568   | 10.00041103 | 0.589778997  | 0.569236479 | 0.569236479 | -5.467065642 |
| 1448347_a_at | 0.046521582  | 11.84847284 | 0.589753714  | 0.569252742 | 0.569252742 | -5.467079486 |
| 1452320_at   | 0.053402721  | 4.028451857 | 0.589752223  | 0.569253701 | 0.569253701 | -5.467080303 |
| 1443695_at   | 0.037903992  | 3.613432872 | 0.589721078  | 0.569273735 | 0.569273735 | -5.467097355 |
| 1422188_s_at | 0.058070598  | 3.420442    | 0.589717627  | 0.569275954 | 0.569275954 | -5.467099244 |
| 1452310_at   | -0.037970309 | 9.086330775 | -0.589703837 | 0.569284825 | 0.569284825 | -5.467106794 |
| 1416388_at   | 0.069601316  | 6.842800212 | 0.589644651  | 0.569322897 | 0.569322897 | -5.467139196 |
| 1437485_at   | -0.057008768 | 6.326086361 | -0.589640597 | 0.569325505 | 0.569325505 | -5.467141416 |
| 1443500_at   | -0.047969537 | 5.885821526 | -0.589570071 | 0.569370874 | 0.569370874 | -5.467180022 |
| 1431176_at   | 0.047322406  | 4.144204486 | 0.589562993  | 0.569375428 | 0.569375428 | -5.467183896 |
| 1438273_at   | 0.049866788  | 3.732530305 | 0.589540271  | 0.569390045 | 0.569390045 | -5.467196333 |
| 1432336_at   | -0.042941109 | 5.172876017 | -0.589467972 | 0.569436557 | 0.569436557 | -5.467235904 |
| 1446848_at   | 0.047460391  | 3.31825695  | 0.589323361  | 0.569529596 | 0.569529596 | -5.467315039 |

|              |              |             |              |             |             |              |
|--------------|--------------|-------------|--------------|-------------|-------------|--------------|
| 1446576_at   | -0.052081359 | 4.128285198 | -0.589307039 | 0.569540098 | 0.569540098 | -5.467323969 |
| 1449671_at   | -0.041065254 | 3.256354675 | -0.589271686 | 0.569562845 | 0.569562845 | -5.467343312 |
| 1452197_at   | 0.04245064   | 10.75352274 | 0.589135605  | 0.569650407 | 0.569650407 | -5.467417756 |
| 1442674_at   | 0.039074188  | 5.268404892 | 0.589097217  | 0.569675109 | 0.569675109 | -5.467438754 |
| 1433035_at   | -0.035947105 | 4.714833802 | -0.58908798  | 0.569681053 | 0.569681053 | -5.467443807 |
| 1419884_at   | 0.066507489  | 5.063049297 | 0.589058499  | 0.569700024 | 0.569700024 | -5.467459931 |
| 1459801_at   | 0.04661977   | 4.773486481 | 0.588966361  | 0.569759318 | 0.569759318 | -5.467510321 |
| 1423907_a_at | 0.043867018  | 11.07681425 | 0.588951019  | 0.569769191 | 0.569769191 | -5.467518711 |
| 1439988_at   | 0.06912674   | 7.398471027 | 0.588950631  | 0.569769441 | 0.569769441 | -5.467518923 |
| 1454230_a_at | 0.08002607   | 5.475879645 | 0.58893244   | 0.569781148 | 0.569781148 | -5.46752887  |
| 1440483_at   | -0.059252451 | 6.792610205 | -0.588845289 | 0.569837237 | 0.569837237 | -5.467576524 |
| 1452478_at   | -0.09459102  | 5.044939236 | -0.588814002 | 0.569857374 | 0.569857374 | -5.46759363  |
| 1459856_at   | 0.073093856  | 4.78233166  | 0.588778101  | 0.56988048  | 0.56988048  | -5.467613257 |
| 1428652_at   | 0.070358729  | 8.214512446 | 0.588762801  | 0.569890328 | 0.569890328 | -5.467621622 |
| 1448025_at   | 0.069319051  | 4.281363401 | 0.588760472  | 0.569891827 | 0.569891827 | -5.467622895 |
| 1444442_at   | -0.042735674 | 4.594323189 | -0.588743781 | 0.569902569 | 0.569902569 | -5.467632019 |
| 1423482_at   | 0.042978255  | 8.162858508 | 0.588472577  | 0.570077142 | 0.570077142 | -5.467780247 |
| 1418905_at   | 0.038933534  | 8.053820236 | 0.588466059  | 0.570081338 | 0.570081338 | -5.467783808 |
| 1431411_a_at | -0.04100811  | 9.683157846 | -0.58844797  | 0.570092983 | 0.570092983 | -5.467793693 |
| 1447209_at   | 0.063107363  | 6.678266401 | 0.58842807   | 0.570105794 | 0.570105794 | -5.467804566 |
| 1449023_a_at | 0.049139746  | 7.561573331 | 0.588417007  | 0.570112916 | 0.570112916 | -5.467810611 |
| 1459707_at   | -0.048918407 | 7.404812258 | -0.588371655 | 0.570142113 | 0.570142113 | -5.46783539  |
| 1443672_at   | -0.073434282 | 3.576606746 | -0.588341314 | 0.570161646 | 0.570161646 | -5.467851966 |
| 1457291_at   | -0.057984108 | 3.453108914 | -0.588331622 | 0.570167886 | 0.570167886 | -5.467857261 |
| 1449476_at   | -0.082478721 | 6.88285302  | -0.588285678 | 0.570197466 | 0.570197466 | -5.46788236  |
| 1417795_at   | 0.058563216  | 3.496469614 | 0.588280327  | 0.57020091  | 0.57020091  | -5.467885283 |
| 1428673_at   | 0.044854846  | 8.467880319 | 0.588253903  | 0.570217923 | 0.570217923 | -5.467899718 |
| 1424031_at   | -0.038238557 | 6.692840517 | -0.588240334 | 0.570226659 | 0.570226659 | -5.467907129 |
| 1435305_at   | 0.054633813  | 3.704730271 | 0.588218333  | 0.570240824 | 0.570240824 | -5.467919147 |
| 1430427_a_at | 0.047194944  | 7.930885093 | 0.588074881  | 0.570333191 | 0.570333191 | -5.467997495 |
| 1456966_at   | 0.060124673  | 3.656495553 | 0.588043624  | 0.570353317 | 0.570353317 | -5.468014563 |
| 1448159_at   | 0.040781921  | 9.073606053 | 0.588038339  | 0.570356721 | 0.570356721 | -5.468017449 |
| 1443393_at   | -0.052119608 | 6.41689696  | -0.588002633 | 0.570379713 | 0.570379713 | -5.468036947 |
| 1441672_at   | -0.040140726 | 3.738872469 | -0.588002602 | 0.570379733 | 0.570379733 | -5.468036964 |
| 1420750_at   | -0.052375312 | 4.503927062 | -0.587975809 | 0.570396986 | 0.570396986 | -5.468051593 |
| 1418565_at   | 0.039908846  | 5.784424701 | 0.587951668  | 0.570412532 | 0.570412532 | -5.468064774 |
| 1450044_at   | 0.043315931  | 9.236992466 | 0.587947221  | 0.570415396 | 0.570415396 | -5.468067203 |
| 1424078_s_at | -0.072612377 | 8.657286947 | -0.587839276 | 0.57048491  | 0.57048491  | -5.468126134 |
| 1449931_at   | -0.069732852 | 3.781666887 | -0.587706427 | 0.570570469 | 0.570570469 | -5.468198648 |
| 1426762_s_at | 0.044615582  | 10.60976372 | 0.587676085  | 0.570590012 | 0.570590012 | -5.468215208 |
| 1443724_at   | 0.058407767  | 4.274060377 | 0.58764337   | 0.570611083 | 0.570611083 | -5.468233062 |
| 1460576_at   | 0.06268185   | 6.698193375 | 0.587600229  | 0.57063887  | 0.57063887  | -5.468256604 |
| 1456254_at   | -0.0767052   | 3.639890952 | -0.587526876 | 0.570686118 | 0.570686118 | -5.46829663  |
| 1455877_a_at | -0.051071862 | 5.630789635 | -0.587470499 | 0.570722432 | 0.570722432 | -5.468327389 |
| 1449375_at   | 0.05341924   | 3.697969877 | 0.587438556  | 0.570743009 | 0.570743009 | -5.468344817 |
| 1453057_at   | -0.067921541 | 4.231143834 | -0.587363534 | 0.570791337 | 0.570791337 | -5.468385743 |
| 1451895_a_at | 0.077202608  | 9.395252706 | 0.587296043  | 0.570834815 | 0.570834815 | -5.468422557 |
| 1449770_x_at | 0.055955488  | 6.541238215 | 0.587282766  | 0.570843369 | 0.570843369 | -5.468429798 |
| 1455703_at   | 0.046074087  | 6.387272629 | 0.587145247  | 0.570931967 | 0.570931967 | -5.468504796 |
| 1441249_at   | 0.050900148  | 3.960269258 | 0.58713579   | 0.570938059 | 0.570938059 | -5.468509952 |
| 1444214_at   | -0.045304563 | 5.057976563 | -0.58713003  | 0.57094177  | 0.57094177  | -5.468513093 |
| 1439245_at   | 0.053169352  | 5.426939205 | 0.58711854   | 0.570949174 | 0.570949174 | -5.468519359 |
| 1452532_x_at | 0.05261507   | 4.246611747 | 0.587100573  | 0.570960749 | 0.570960749 | -5.468529155 |

|              |              |             |              |             |             |              |
|--------------|--------------|-------------|--------------|-------------|-------------|--------------|
| 1436474_at   | 0.054818295  | 4.301616069 | 0.587078594  | 0.570974911 | 0.570974911 | -5.468541139 |
| 1423747_a_at | 0.104788945  | 8.866107819 | 0.587072355  | 0.570978931 | 0.570978931 | -5.468544541 |
| 1445287_at   | -0.040027309 | 3.85287575  | -0.587069558 | 0.570980733 | 0.570980733 | -5.468546066 |
| 1439274_at   | -0.057100132 | 4.150724605 | -0.587020744 | 0.571012185 | 0.571012185 | -5.468572681 |
| 1433442_at   | 0.046253289  | 10.4320639  | 0.587007969  | 0.571020417 | 0.571020417 | -5.468579645 |
| 1441525_at   | -0.04861401  | 4.349269317 | -0.586894217 | 0.571093714 | 0.571093714 | -5.468641656 |
| 1424429_s_at | 0.049734566  | 7.158313643 | 0.586881146  | 0.571102137 | 0.571102137 | -5.46864878  |
| 1417975_at   | -0.059025173 | 5.895830715 | -0.586830702 | 0.571134643 | 0.571134643 | -5.468676275 |
| 1451467_s_at | -0.040758108 | 8.176835255 | -0.586817989 | 0.571142836 | 0.571142836 | -5.468683204 |
| 1455486_at   | 0.077365388  | 7.434547486 | 0.586800342  | 0.571154208 | 0.571154208 | -5.468692822 |
| 1441606_at   | 0.068539829  | 3.788122678 | 0.586792074  | 0.571159536 | 0.571159536 | -5.468697329 |
| 1423174_a_at | 0.04350006   | 5.1540541   | 0.586746219  | 0.571189087 | 0.571189087 | -5.468722318 |
| 1427585_at   | -0.036700685 | 3.009897308 | -0.586744841 | 0.571189975 | 0.571189975 | -5.468723069 |
| 1450091_at   | -0.055132084 | 4.582665411 | -0.586714998 | 0.571209207 | 0.571209207 | -5.468739332 |
| 1454928_at   | -0.050171694 | 8.416903858 | -0.586560719 | 0.571308639 | 0.571308639 | -5.468823394 |
| 1450743_s_at | 0.044639406  | 8.498691241 | 0.586554233  | 0.571312819 | 0.571312819 | -5.468826928 |
| 1422656_at   | 0.056591007  | 3.593496108 | 0.586515531  | 0.571337764 | 0.571337764 | -5.468848012 |
| 1439786_at   | -0.060966305 | 5.160351531 | -0.586455435 | 0.571376499 | 0.571376499 | -5.468880748 |
| 1429795_at   | -0.053448034 | 4.969989358 | -0.586337145 | 0.571452747 | 0.571452747 | -5.468945176 |
| 1447587_at   | -0.050698239 | 3.614340968 | -0.586316707 | 0.571465922 | 0.571465922 | -5.468956307 |
| 1442214_at   | 0.058506452  | 9.771387823 | 0.586263857  | 0.57149999  | 0.57149999  | -5.468985087 |
| 1448408_at   | -0.076849475 | 6.223524387 | -0.586259689 | 0.571502677 | 0.571502677 | -5.468987357 |
| 1430266_at   | -0.051302402 | 4.40202981  | -0.586191575 | 0.571546588 | 0.571546588 | -5.469024447 |
| 1422106_a_at | -0.057261144 | 7.317831133 | -0.586153871 | 0.571570895 | 0.571570895 | -5.469044975 |
| 1419334_at   | -0.049431561 | 3.909922685 | -0.586144191 | 0.571577135 | 0.571577135 | -5.469050246 |
| 1432834_at   | -0.067045409 | 3.781546217 | -0.586053493 | 0.571635609 | 0.571635609 | -5.469099622 |
| 1420373_at   | 0.052752063  | 4.743993874 | 0.586005925  | 0.571666278 | 0.571666278 | -5.469125516 |
| 1423789_at   | -0.042454616 | 8.394413062 | -0.586002419 | 0.571668538 | 0.571668538 | -5.469127424 |
| 1421377_at   | 0.04703598   | 4.879777249 | 0.585953021  | 0.571700388 | 0.571700388 | -5.469154312 |
| 1428522_at   | 0.041522576  | 7.673208971 | 0.585947583  | 0.571703894 | 0.571703894 | -5.469157271 |
| 1425548_a_at | 0.079851767  | 7.527900246 | 0.585872329  | 0.571752416 | 0.571752416 | -5.469198228 |
| 1455075_at   | 0.047225031  | 5.871641623 | 0.585856903  | 0.571762363 | 0.571762363 | -5.469206623 |
| 1437539_at   | -0.070362977 | 6.188410178 | -0.585810924 | 0.571792011 | 0.571792011 | -5.469231644 |
| 1457576_at   | -0.046210417 | 4.863607485 | -0.585797874 | 0.571800426 | 0.571800426 | -5.469238745 |
| 1432909_at   | -0.037610498 | 3.193005421 | -0.585786586 | 0.571807705 | 0.571807705 | -5.469244888 |
| 1427298_at   | -0.068555691 | 8.894521994 | -0.585764509 | 0.571821942 | 0.571821942 | -5.469256901 |
| 1430311_at   | 0.046221244  | 7.516851563 | 0.585760518  | 0.571824515 | 0.571824515 | -5.469259072 |
| 1429793_at   | -0.042846698 | 5.023680758 | -0.585670901 | 0.571882306 | 0.571882306 | -5.469307831 |
| 1458517_at   | 0.049333202  | 5.646590576 | 0.585647878  | 0.571897153 | 0.571897153 | -5.469320356 |
| 1454497_at   | 0.047222128  | 3.887675651 | 0.585554823  | 0.571957165 | 0.571957165 | -5.469370977 |
| 1432015_a_at | 0.042106787  | 3.424931154 | 0.585500356  | 0.571992293 | 0.571992293 | -5.469400602 |
| 1429197_s_at | -0.055862905 | 4.25590226  | -0.585470825 | 0.572011339 | 0.572011339 | -5.469416663 |
| 1444488_at   | -0.075052229 | 4.463481576 | -0.585442788 | 0.572029422 | 0.572029422 | -5.469431912 |
| 1422800_at   | -0.04668584  | 4.671357694 | -0.585425794 | 0.572040382 | 0.572040382 | -5.469441154 |
| 1456996_at   | -0.06264481  | 5.348210925 | -0.585389391 | 0.572063862 | 0.572063862 | -5.469460951 |
| 1428443_a_at | -0.037122025 | 7.350973916 | -0.585254421 | 0.57215092  | 0.57215092  | -5.469534339 |
| 1435065_x_at | 0.047018507  | 3.622361308 | 0.585197704  | 0.572187507 | 0.572187507 | -5.469565174 |
| 1428897_at   | -0.056806272 | 6.797829601 | -0.58518073  | 0.572198456 | 0.572198456 | -5.469574402 |
| 1428921_at   | 0.090083448  | 7.006353441 | 0.585099441  | 0.572250895 | 0.572250895 | -5.469618589 |
| 1453927_at   | -0.049954124 | 4.133075308 | -0.585072494 | 0.572268279 | 0.572268279 | -5.469633237 |
| 1433426_at   | -0.046808534 | 4.187550725 | -0.585049771 | 0.572282938 | 0.572282938 | -5.469645587 |
| 1426254_at   | 0.040747541  | 8.558326367 | 0.58502544   | 0.572298635 | 0.572298635 | -5.469658811 |
| 1424312_at   | -0.050569343 | 6.632217413 | -0.584990076 | 0.57232145  | 0.57232145  | -5.46967803  |

|              |              |             |              |             |             |              |
|--------------|--------------|-------------|--------------|-------------|-------------|--------------|
| 1432899_at   | -0.062969163 | 4.892028895 | -0.584947991 | 0.572348602 | 0.572348602 | -5.469700901 |
| 1455518_at   | 0.066123985  | 4.682993386 | 0.584915048  | 0.572369856 | 0.572369856 | -5.469718803 |
| 1435501_at   | -0.049281999 | 5.652536139 | -0.584900108 | 0.572379495 | 0.572379495 | -5.469726921 |
| 1458066_at   | 0.044713154  | 3.751044429 | 0.584864142  | 0.5724027   | 0.5724027   | -5.469746464 |
| 1451289_at   | 0.058088642  | 8.763702406 | 0.584773587  | 0.572461129 | 0.572461129 | -5.469795663 |
| 1446110_at   | 0.061106078  | 3.380532184 | 0.584752512  | 0.572474727 | 0.572474727 | -5.469807113 |
| 1435875_at   | -0.041091981 | 7.834674423 | -0.584706839 | 0.572504198 | 0.572504198 | -5.469831924 |
| 1434395_at   | -0.037848284 | 9.062866765 | -0.584674217 | 0.572525248 | 0.572525248 | -5.469849644 |
| 1456735_x_at | -0.11317372  | 9.411879278 | -0.584669925 | 0.572528018 | 0.572528018 | -5.469851976 |
| 1431452_at   | -0.050854428 | 3.943724014 | -0.584657587 | 0.572535979 | 0.572535979 | -5.469858677 |
| 1424537_at   | -0.094409612 | 3.608788005 | -0.584626217 | 0.572556222 | 0.572556222 | -5.469875716 |
| 1451048_at   | 0.055892511  | 5.074598215 | 0.584530077  | 0.572618263 | 0.572618263 | -5.469927931 |
| 1439809_at   | 0.046945003  | 3.884917214 | 0.584447234  | 0.572671727 | 0.572671727 | -5.469972917 |
| 1460670_at   | 0.051807744  | 8.866966598 | 0.584442288  | 0.572674919 | 0.572674919 | -5.469975603 |
| 1437081_at   | 0.061959947  | 3.746307522 | 0.584409471  | 0.572696098 | 0.572696098 | -5.469993422 |
| 1423745_at   | 0.037776773  | 9.554438063 | 0.584329839  | 0.572747493 | 0.572747493 | -5.470036656 |
| 1431728_at   | -0.038999038 | 4.692258117 | -0.584253317 | 0.572796883 | 0.572796883 | -5.470078197 |
| 1433222_at   | 0.050413517  | 4.242067011 | 0.584244314  | 0.572802694 | 0.572802694 | -5.470083084 |
| 1446364_at   | -0.045019124 | 3.37428962  | -0.584223926 | 0.572815854 | 0.572815854 | -5.470094151 |
| 1436071_at   | -0.046540223 | 7.722542104 | -0.584107657 | 0.572890904 | 0.572890904 | -5.470157256 |
| 1450616_at   | 0.063471548  | 3.611488086 | 0.584085023  | 0.572905515 | 0.572905515 | -5.47016954  |
| 1435083_at   | 0.071306781  | 9.195486435 | 0.584084601  | 0.572905787 | 0.572905787 | -5.470169769 |
| 1448340_at   | 0.04510766   | 6.52860584  | 0.584070224  | 0.572915068 | 0.572915068 | -5.470177571 |
| 1443128_at   | -0.040138786 | 8.114459207 | -0.584020181 | 0.572947372 | 0.572947372 | -5.470204727 |
| 1438831_at   | -0.05690769  | 7.441845045 | -0.583925453 | 0.573008526 | 0.573008526 | -5.470256126 |
| 1430022_at   | -0.046273754 | 6.572383536 | -0.583866608 | 0.573046516 | 0.573046516 | -5.47028805  |
| 1428370_at   | 0.048743612  | 7.787043675 | 0.58382612   | 0.573072655 | 0.573072655 | -5.470310014 |
| 1431828_a_at | -0.074579244 | 4.470992744 | -0.583660266 | 0.57317974  | 0.57317974  | -5.470399972 |
| 1451298_at   | -0.05017516  | 7.754306717 | -0.583651861 | 0.573185167 | 0.573185167 | -5.47040453  |
| 1454770_at   | -0.06751259  | 5.500811196 | -0.583610456 | 0.573211902 | 0.573211902 | -5.470426984 |
| 1442373_at   | -0.061664023 | 7.411731906 | -0.583552515 | 0.573249316 | 0.573249316 | -5.470458403 |
| 1419158_a_at | 0.036784879  | 8.524401038 | 0.583550123  | 0.573250861 | 0.573250861 | -5.4704597   |
| 1441703_at   | 0.051097624  | 4.492739055 | 0.583543955  | 0.573254843 | 0.573254843 | -5.470463044 |
| 1423694_at   | 0.044434988  | 9.436817658 | 0.583536393  | 0.573259727 | 0.573259727 | -5.470467145 |
| 1446371_at   | 0.044882562  | 7.481044598 | 0.583520975  | 0.573269683 | 0.573269683 | -5.470475504 |
| 1456700_x_at | 0.066731719  | 11.99302624 | 0.583433302  | 0.573326299 | 0.573326299 | -5.470523038 |
| 1459418_at   | -0.053538674 | 3.881943605 | -0.583431628 | 0.57332738  | 0.57332738  | -5.470523945 |
| 1458092_at   | -0.057048829 | 6.15681483  | -0.583424919 | 0.573331712 | 0.573331712 | -5.470527582 |
| 1426000_at   | 0.05051268   | 4.22101049  | 0.583417077  | 0.573336777 | 0.573336777 | -5.470531833 |
| 1460014_at   | -0.036643524 | 3.357356152 | -0.58339909  | 0.573348392 | 0.573348392 | -5.470541584 |
| 1458966_at   | -0.050485974 | 3.305459358 | -0.583363128 | 0.573371617 | 0.573371617 | -5.470561079 |
| 1456494_a_at | 0.090681508  | 4.349996906 | 0.583307754  | 0.573407379 | 0.573407379 | -5.470591094 |
| 1445527_at   | -0.065155369 | 3.800203512 | -0.583228842 | 0.573458344 | 0.573458344 | -5.470633864 |
| 1424086_at   | -0.041162396 | 9.465099847 | -0.58322664  | 0.573459766 | 0.573459766 | -5.470635057 |
| 1450880_at   | 0.053127523  | 9.386093871 | 0.583193016  | 0.573481483 | 0.573481483 | -5.470653279 |
| 1432389_at   | 0.043265551  | 4.233483841 | 0.583185521  | 0.573486324 | 0.573486324 | -5.47065734  |
| 1455677_s_at | -0.067764994 | 4.977867001 | -0.583139831 | 0.573515835 | 0.573515835 | -5.4706821   |
| 1446834_at   | 0.059972091  | 4.392260321 | 0.58312379   | 0.573526195 | 0.573526195 | -5.470690792 |
| 1427736_a_at | 0.04875682   | 4.869775877 | 0.583121196  | 0.573527871 | 0.573527871 | -5.470692198 |
| 1446850_at   | 0.048672957  | 6.853827693 | 0.583106524  | 0.573537348 | 0.573537348 | -5.470700148 |
| 1456776_at   | 0.060069247  | 4.290638166 | 0.583082109  | 0.573553118 | 0.573553118 | -5.470713377 |
| 1420217_x_at | -0.099799647 | 4.385544445 | -0.583077099 | 0.573556354 | 0.573556354 | -5.470716091 |
| 1447348_at   | 0.060581663  | 6.43105769  | 0.583076091  | 0.573557005 | 0.573557005 | -5.470716637 |

|              |              |             |              |             |             |              |
|--------------|--------------|-------------|--------------|-------------|-------------|--------------|
| 1448476_at   | 0.036179505  | 10.44945613 | 0.583063061  | 0.573565421 | 0.573565421 | -5.470723697 |
| 1452580_a_at | 0.043155121  | 9.129805551 | 0.58304424   | 0.573577578 | 0.573577578 | -5.470733894 |
| 1447265_at   | 0.051305578  | 3.228665281 | 0.583018133  | 0.573594442 | 0.573594442 | -5.470748038 |
| 1418373_at   | -0.094164481 | 7.333336693 | -0.583009747 | 0.573599859 | 0.573599859 | -5.470752582 |
| 1451358_a_at | 0.037173911  | 8.849987817 | 0.58294506   | 0.573641645 | 0.573641645 | -5.470787626 |
| 1459946_at   | 0.038830171  | 4.381701111 | 0.582894895  | 0.57367405  | 0.57367405  | -5.470814799 |
| 1436108_at   | -0.050576328 | 4.164894689 | -0.582869035 | 0.573690756 | 0.573690756 | -5.470828806 |
| 1429566_a_at | 0.068884353  | 5.742346075 | 0.58285121   | 0.573702272 | 0.573702272 | -5.470838461 |
| 1442178_at   | -0.036310949 | 6.53279438  | -0.582784664 | 0.573745262 | 0.573745262 | -5.470874502 |
| 1446638_at   | -0.042494931 | 4.193343806 | -0.582782674 | 0.573746548 | 0.573746548 | -5.47087558  |
| 1448244_at   | 0.067928413  | 8.484651289 | 0.582722808  | 0.573785224 | 0.573785224 | -5.470908    |
| 1451781_at   | 0.046874964  | 4.129320946 | 0.582716547  | 0.57378927  | 0.57378927  | -5.470911391 |
| 1443053_at   | 0.073398803  | 8.51426805  | 0.58269087   | 0.573805859 | 0.573805859 | -5.470925295 |
| 1422093_at   | -0.050165642 | 4.657390366 | -0.58269081  | 0.573805898 | 0.573805898 | -5.470925328 |
| 1439625_at   | -0.067988953 | 5.830556348 | -0.582690068 | 0.573806377 | 0.573806377 | -5.470925729 |
| 1419349_a_at | -0.055254804 | 4.282376546 | -0.582656192 | 0.573828264 | 0.573828264 | -5.470944072 |
| 1456450_at   | -0.042287304 | 5.23604626  | -0.582624588 | 0.573848683 | 0.573848683 | -5.470961184 |
| 1451496_at   | 0.040816054  | 6.570470429 | 0.582579532  | 0.573877795 | 0.573877795 | -5.470985578 |
| 1453008_at   | 0.105053403  | 6.80969619  | 0.582542945  | 0.573901435 | 0.573901435 | -5.471005386 |
| 1458855_at   | 0.044756088  | 3.648803381 | 0.582530553  | 0.573909442 | 0.573909442 | -5.471012094 |
| 1423440_at   | -0.040778431 | 9.366095458 | -0.582479113 | 0.57394268  | 0.57394268  | -5.471039941 |
| 1459633_at   | -0.055060568 | 3.95325009  | -0.582472687 | 0.573946832 | 0.573946832 | -5.471043419 |
| 1421761_a_at | -0.059740876 | 4.969125135 | -0.582418359 | 0.573981938 | 0.573981938 | -5.471072826 |
| 1418967_a_at | -0.038582557 | 7.691138153 | -0.582412285 | 0.573985863 | 0.573985863 | -5.471076114 |
| 1421987_at   | 0.072876602  | 7.233695966 | 0.582371806  | 0.57401202  | 0.57401202  | -5.471098022 |
| 1420232_at   | -0.043669851 | 3.822880266 | -0.582364606 | 0.574016673 | 0.574016673 | -5.471101919 |
| 1449751_at   | -0.062257974 | 5.336079756 | -0.582360202 | 0.574019519 | 0.574019519 | -5.471104303 |
| 1449469_at   | -0.068947348 | 3.575204952 | -0.582334656 | 0.574036027 | 0.574036027 | -5.471118128 |
| 1429004_at   | 0.053720431  | 9.83641872  | 0.582273908  | 0.574075285 | 0.574075285 | -5.471151002 |
| 1451629_at   | 0.044611745  | 5.860637404 | 0.582217394  | 0.574111808 | 0.574111808 | -5.471181583 |
| 1441517_at   | 0.048463883  | 3.311034955 | 0.582208535  | 0.574117533 | 0.574117533 | -5.471186376 |
| 1444767_at   | -0.142706507 | 6.486003086 | -0.582186469 | 0.574131794 | 0.574131794 | -5.471198315 |
| 1417828_at   | -0.037583043 | 4.440448405 | -0.582108142 | 0.574182416 | 0.574182416 | -5.471240692 |
| 1423451_at   | 0.037728439  | 11.57702772 | 0.582006931  | 0.574247833 | 0.574247833 | -5.471295443 |
| 1448132_at   | -0.03998594  | 7.768150632 | -0.581989525 | 0.574259083 | 0.574259083 | -5.471304857 |
| 1455720_at   | -0.059299887 | 7.495913531 | -0.58195982  | 0.574278284 | 0.574278284 | -5.471320924 |
| 1433973_at   | 0.040393846  | 9.679077989 | 0.581944572  | 0.57428814  | 0.57428814  | -5.471329171 |
| 1458851_at   | -0.063284731 | 3.516113385 | -0.581915824 | 0.574306721 | 0.574306721 | -5.471344719 |
| 1435517_x_at | 0.053932712  | 8.954496517 | 0.581842813  | 0.574353916 | 0.574353916 | -5.471384203 |
| 1432219_at   | 0.066529902  | 4.522389164 | 0.581790203  | 0.574387926 | 0.574387926 | -5.471412652 |
| 1424391_at   | -0.038744889 | 9.649848334 | -0.581749834 | 0.574414022 | 0.574414022 | -5.471434448 |
| 1452780_at   | 0.052527851  | 8.887129357 | 0.581654452  | 0.574475684 | 0.574475684 | -5.471486047 |
| 1450588_at   | -0.047223332 | 3.902828434 | -0.581589981 | 0.574517366 | 0.574517366 | -5.471520899 |
| 1415783_at   | 0.037463552  | 10.84423591 | 0.581568452  | 0.574531284 | 0.574531284 | -5.471532536 |
| 1455571_x_at | 0.055444828  | 11.6562457  | 0.581536391  | 0.574552013 | 0.574552013 | -5.471549866 |
| 1456553_at   | 0.074524183  | 7.501787681 | 0.581506056  | 0.574571626 | 0.574571626 | -5.471566262 |
| 1442519_at   | 0.096185201  | 5.925514979 | 0.581478382  | 0.574589519 | 0.574589519 | -5.471581219 |
| 1424092_at   | 0.047137178  | 8.400611174 | 0.581470374  | 0.574594697 | 0.574594697 | -5.471585546 |
| 1440041_at   | 0.040982343  | 6.508480794 | 0.581458106  | 0.574602629 | 0.574602629 | -5.471592177 |
| 1455984_at   | -0.093919432 | 4.458640182 | -0.58140547  | 0.574636663 | 0.574636663 | -5.471620622 |
| 1456161_at   | 0.061315774  | 4.870733056 | 0.581370264  | 0.574659427 | 0.574659427 | -5.471639647 |
| 1427823_at   | 0.055095074  | 5.943942354 | 0.581301462  | 0.574703917 | 0.574703917 | -5.471676823 |
| 1428564_at   | -0.049916608 | 8.006529026 | -0.581274644 | 0.574721258 | 0.574721258 | -5.471691312 |

|              |              |             |              |             |             |              |
|--------------|--------------|-------------|--------------|-------------|-------------|--------------|
| 1453148_at   | 0.072558649  | 7.874556403 | 0.581231577  | 0.574749108 | 0.574749108 | -5.471714579 |
| 1427214_at   | -0.057494827 | 5.468579159 | -0.581144324 | 0.574805533 | 0.574805533 | -5.471761714 |
| 1439346_at   | -0.065394817 | 3.947826614 | -0.581116037 | 0.574823826 | 0.574823826 | -5.471776993 |
| 1452577_at   | 0.040294646  | 3.142130165 | 0.581105489  | 0.574830648 | 0.574830648 | -5.471782691 |
| 1417140_a_at | 0.045232846  | 9.146424415 | 0.581102095  | 0.574832843 | 0.574832843 | -5.471784524 |
| 1428717_at   | 0.063919905  | 7.095487732 | 0.580970103  | 0.574918208 | 0.574918208 | -5.47185581  |
| 1454211_a_at | -0.046609233 | 6.013987644 | -0.580953328 | 0.574929057 | 0.574929057 | -5.471864868 |
| 1419913_at   | 0.097594974  | 5.299285477 | 0.580942102  | 0.574936318 | 0.574936318 | -5.47187093  |
| 1444990_at   | 0.050353852  | 3.782189095 | 0.580887756  | 0.574971469 | 0.574971469 | -5.471900276 |
| 1434734_at   | 0.065932561  | 6.1349507   | 0.58077042   | 0.575047365 | 0.575047365 | -5.471963625 |
| 1431977_at   | 0.04671787   | 4.408159651 | 0.580730378  | 0.575073267 | 0.575073267 | -5.471985241 |
| 1421359_at   | 0.046416189  | 5.246062673 | 0.580720288  | 0.575079794 | 0.575079794 | -5.471990688 |
| 1432265_at   | -0.048515597 | 3.72762954  | -0.580679122 | 0.575106423 | 0.575106423 | -5.472012908 |
| 1431822_a_at | 0.043996485  | 9.432588142 | 0.580631008  | 0.575137548 | 0.575137548 | -5.472038878 |
| 1416881_at   | 0.054407765  | 8.884726435 | 0.580548903  | 0.575190663 | 0.575190663 | -5.472083189 |
| 1431082_a_at | -0.038192721 | 7.014074596 | -0.580543911 | 0.575193893 | 0.575193893 | -5.472085883 |
| 1434196_at   | -0.067380901 | 6.441124944 | -0.580539912 | 0.57519648  | 0.57519648  | -5.472088041 |
| 1438530_at   | -0.056588771 | 6.320993327 | -0.580467664 | 0.575243222 | 0.575243222 | -5.472127028 |
| 1448364_at   | 0.03997312   | 8.947993753 | 0.580467344  | 0.575243429 | 0.575243429 | -5.4721272   |
| 1446319_at   | -0.04640788  | 4.338176417 | -0.580444984 | 0.575257895 | 0.575257895 | -5.472139265 |
| 1447660_at   | -0.043854884 | 3.420470882 | -0.580421664 | 0.575272983 | 0.575272983 | -5.472151848 |
| 1423608_at   | -0.047964155 | 12.72495836 | -0.580421016 | 0.575273403 | 0.575273403 | -5.472152198 |
| 1433856_at   | 0.096510411  | 8.078966431 | 0.580306211  | 0.575347683 | 0.575347683 | -5.472214135 |
| 1431292_a_at | 0.044999098  | 7.249407265 | 0.580284392  | 0.575361801 | 0.575361801 | -5.472225905 |
| 1454817_at   | -0.059284184 | 8.169399915 | -0.580263513 | 0.575375311 | 0.575375311 | -5.472237168 |
| 1436684_a_at | -0.093531957 | 7.643368451 | -0.58025506  | 0.57538078  | 0.57538078  | -5.472241727 |
| 1449736_at   | 0.042296468  | 3.716876262 | 0.580248599  | 0.575384961 | 0.575384961 | -5.472245212 |
| 1422299_a_at | -0.059091795 | 4.860334566 | -0.58024112  | 0.5753898   | 0.5753898   | -5.472249246 |
| 1441310_at   | -0.036954441 | 5.968361657 | -0.58022862  | 0.575397888 | 0.575397888 | -5.472255989 |
| 1436140_at   | -0.064452041 | 5.101875234 | -0.5802248   | 0.57540036  | 0.57540036  | -5.472258049 |
| 1425813_at   | -0.054447047 | 4.158834225 | -0.580218796 | 0.575404245 | 0.575404245 | -5.472261287 |
| 1444202_at   | 0.085412589  | 5.217426428 | 0.580189958  | 0.575422906 | 0.575422906 | -5.472276842 |
| 1422195_s_at | -0.162344029 | 5.835694327 | -0.580169162 | 0.575436362 | 0.575436362 | -5.472288058 |
| 1450392_at   | 0.067109648  | 6.619562111 | 0.580126018  | 0.575464281 | 0.575464281 | -5.472311326 |
| 1425949_at   | 0.059852099  | 3.566135112 | 0.580110398  | 0.575474389 | 0.575474389 | -5.47231975  |
| 1456654_at   | -0.041996987 | 5.298837495 | -0.58010684  | 0.575476692 | 0.575476692 | -5.472321668 |
| 1452969_at   | -0.042951043 | 8.167308836 | -0.580067637 | 0.575502061 | 0.575502061 | -5.472342809 |
| 1421729_a_at | -0.037767513 | 7.225156337 | -0.580009455 | 0.575539713 | 0.575539713 | -5.472374182 |
| 1446919_at   | 0.036276567  | 4.99432542  | 0.579997658  | 0.575547347 | 0.575547347 | -5.472380543 |
| 1418336_at   | 0.055841447  | 5.018340306 | 0.579995088  | 0.575549011 | 0.575549011 | -5.472381929 |
| 1440279_at   | 0.063892158  | 8.508802539 | 0.579961636  | 0.57557066  | 0.57557066  | -5.472399965 |
| 1447388_at   | -0.055961827 | 3.650420118 | -0.579936225 | 0.575587105 | 0.575587105 | -5.472413665 |
| 1446369_at   | -0.065485003 | 5.340215701 | -0.579932241 | 0.575589684 | 0.575589684 | -5.472415813 |
| 1444421_at   | 0.043951491  | 5.780511192 | 0.579891367  | 0.575616137 | 0.575616137 | -5.472437848 |
| 1448727_at   | -0.040216312 | 6.901708306 | -0.579857138 | 0.57563829  | 0.57563829  | -5.472456301 |
| 1450495_a_at | -0.044501886 | 4.384681148 | -0.579848606 | 0.575643813 | 0.575643813 | -5.4724609   |
| 1441469_at   | -0.046854091 | 3.509493675 | -0.579826697 | 0.575657992 | 0.575657992 | -5.47247271  |
| 1434218_at   | 0.072464487  | 6.610713361 | 0.579788563  | 0.575682675 | 0.575682675 | -5.472493265 |
| 1450969_at   | -0.042733382 | 8.709044768 | -0.579773253 | 0.575692584 | 0.575692584 | -5.472501517 |
| 1440091_at   | -0.060743675 | 9.70356779  | -0.579733598 | 0.575718251 | 0.575718251 | -5.47252289  |
| 1435301_at   | -0.052628617 | 6.502221324 | -0.579704866 | 0.575736848 | 0.575736848 | -5.472538375 |
| 1438501_at   | -0.044873013 | 7.146552811 | -0.579664084 | 0.575763246 | 0.575763246 | -5.472560353 |
| 1453100_at   | -0.066339915 | 5.668490698 | -0.579609973 | 0.575798273 | 0.575798273 | -5.472589513 |

|              |              |             |              |             |             |              |
|--------------|--------------|-------------|--------------|-------------|-------------|--------------|
| 1424074_at   | 0.04476956   | 7.364086478 | 0.579559714  | 0.575830806 | 0.575830806 | -5.472616593 |
| 1435264_at   | -0.07186655  | 8.400689431 | -0.579526354 | 0.575852402 | 0.575852402 | -5.472634568 |
| 1417833_at   | 0.052368302  | 7.140163006 | 0.579503242  | 0.575867364 | 0.575867364 | -5.47264702  |
| 1437489_x_at | -0.093021481 | 6.378300547 | -0.579488496 | 0.57587691  | 0.57587691  | -5.472654965 |
| 1432279_at   | -0.049903506 | 3.892863924 | -0.579478929 | 0.575883103 | 0.575883103 | -5.472660119 |
| 1452956_a_at | 0.036199089  | 8.286490757 | 0.579455735  | 0.575898118 | 0.575898118 | -5.472672614 |
| 1447779_x_at | -0.055729386 | 5.920614816 | -0.579447623 | 0.57590337  | 0.57590337  | -5.472676984 |
| 1428386_at   | 0.052082078  | 7.620113573 | 0.579443758  | 0.575905872 | 0.575905872 | -5.472679066 |
| 1441990_at   | 0.043978538  | 6.041024624 | 0.579420035  | 0.57592123  | 0.57592123  | -5.472691846 |
| 1456975_at   | -0.049188592 | 6.786503385 | -0.579394166 | 0.575937977 | 0.575937977 | -5.472705781 |
| 1453038_at   | 0.061701537  | 8.300641258 | 0.579359014  | 0.575960735 | 0.575960735 | -5.472724715 |
| 1430604_a_at | -0.065056122 | 7.895283853 | -0.579326248 | 0.575981948 | 0.575981948 | -5.472742364 |
| 1457100_at   | -0.054783753 | 3.519884862 | -0.579321249 | 0.575985185 | 0.575985185 | -5.472745057 |
| 1434958_at   | -0.058745096 | 7.402924434 | -0.579319748 | 0.575986157 | 0.575986157 | -5.472745865 |
| 1430421_a_at | 0.039449341  | 8.566796941 | 0.579306626  | 0.575994652 | 0.575994652 | -5.472752932 |
| 1446278_at   | -0.08458857  | 6.735897188 | -0.579300573 | 0.575998571 | 0.575998571 | -5.472756192 |
| 1452627_at   | 0.039065312  | 9.980167073 | 0.579258744  | 0.576025654 | 0.576025654 | -5.47277872  |
| 1416138_at   | 0.04472977   | 9.644926892 | 0.579253767  | 0.576028876 | 0.576028876 | -5.472781401 |
| 1430553_at   | 0.052560559  | 3.712966143 | 0.57924831   | 0.576032409 | 0.576032409 | -5.47278434  |
| 1425529_s_at | 0.03991525   | 8.094631081 | 0.579202799  | 0.576061876 | 0.576061876 | -5.472808848 |
| 1450101_a_at | -0.056524661 | 5.864751036 | -0.579135665 | 0.576105345 | 0.576105345 | -5.472844999 |
| 1449895_at   | 0.05785336   | 4.832126158 | 0.579134246  | 0.576106264 | 0.576106264 | -5.472845763 |
| 1447933_at   | 0.045711432  | 8.343322978 | 0.579130072  | 0.576108967 | 0.576108967 | -5.47284801  |
| 1458404_at   | -0.055582444 | 5.599296556 | -0.579074324 | 0.576145065 | 0.576145065 | -5.472878025 |
| 1418380_at   | -0.071352574 | 7.854853628 | -0.579058245 | 0.576155476 | 0.576155476 | -5.472886682 |
| 1433025_x_at | 0.045844698  | 5.561801768 | 0.579028239  | 0.576174907 | 0.576174907 | -5.472902837 |
| 1436690_at   | 0.038940708  | 3.041449092 | 0.579019132  | 0.576180804 | 0.576180804 | -5.472907739 |
| 1426763_at   | 0.036141648  | 10.19721821 | 0.578945403  | 0.576228548 | 0.576228548 | -5.472947429 |
| 1426250_s_at | -0.05674327  | 7.204308555 | -0.578853152 | 0.57628829  | 0.57628829  | -5.472997082 |
| 1449137_at   | 0.043555026  | 9.494641238 | 0.578816382  | 0.576312104 | 0.576312104 | -5.473016871 |
| 1422923_at   | 0.073081414  | 4.868419462 | 0.578767963  | 0.576343462 | 0.576343462 | -5.473042928 |
| 1452581_at   | -0.04926278  | 7.259733964 | -0.57867955  | 0.576400724 | 0.576400724 | -5.473090502 |
| 1420369_a_at | 0.043822794  | 3.487188954 | 0.578674864  | 0.57640376  | 0.57640376  | -5.473093024 |
| 1420151_at   | 0.06390886   | 3.385848457 | 0.578665699  | 0.576409695 | 0.576409695 | -5.473097955 |
| 1451072_a_at | 0.040056658  | 9.358765602 | 0.578534287  | 0.576494814 | 0.576494814 | -5.473168653 |
| 1447711_x_at | 0.038933335  | 7.041299096 | 0.578530065  | 0.576497549 | 0.576497549 | -5.473170924 |
| 1451570_a_at | 0.04075737   | 10.50306054 | 0.578489444  | 0.576523862 | 0.576523862 | -5.473192775 |
| 1445739_at   | -0.0469373   | 3.785181252 | -0.578373305 | 0.576599095 | 0.576599095 | -5.473255239 |
| 1457468_at   | -0.044823223 | 7.712720374 | -0.578362666 | 0.576605987 | 0.576605987 | -5.473260961 |
| 1420342_at   | -0.04613848  | 7.737394783 | -0.578299125 | 0.576647151 | 0.576647151 | -5.47329513  |
| 1436998_at   | 0.050015141  | 3.155043847 | 0.578279687  | 0.576659744 | 0.576659744 | -5.473305582 |
| 1433993_at   | -0.057518324 | 8.662688759 | -0.578230944 | 0.576691323 | 0.576691323 | -5.473331791 |
| 1416620_at   | 0.036216929  | 8.802520616 | 0.578222013  | 0.576697109 | 0.576697109 | -5.473336593 |
| 1451028_at   | -0.049824434 | 6.187864655 | -0.578221948 | 0.576697151 | 0.576697151 | -5.473336628 |
| 1416409_at   | -0.035128319 | 8.241395733 | -0.578214683 | 0.576701857 | 0.576701857 | -5.473340534 |
| 1438644_x_at | 0.068141543  | 8.981195378 | 0.578151217  | 0.576742976 | 0.576742976 | -5.473374655 |
| 1429368_at   | 0.06987785   | 7.444805665 | 0.578118238  | 0.576764343 | 0.576764343 | -5.473392384 |
| 1450137_at   | 0.071774987  | 5.462697    | 0.577979983  | 0.576853925 | 0.576853925 | -5.473466698 |
| 1440774_x_at | -0.041520039 | 3.340323667 | -0.577975051 | 0.576857121 | 0.576857121 | -5.473469349 |
| 1424773_at   | 0.046181147  | 8.418006489 | 0.577956855  | 0.576868911 | 0.576868911 | -5.473479129 |
| 1435616_at   | -0.097937702 | 8.929148605 | -0.57795476  | 0.576870269 | 0.576870269 | -5.473480254 |
| 1456157_at   | 0.096871305  | 4.260054352 | 0.577941225  | 0.576879039 | 0.576879039 | -5.473487528 |
| 1432532_at   | -0.045122057 | 4.42658503  | -0.577854043 | 0.576935534 | 0.576935534 | -5.473534379 |



|              |              |             |              |             |             |              |
|--------------|--------------|-------------|--------------|-------------|-------------|--------------|
| 1424446_at   | -0.060649023 | 6.394652371 | -0.57784091  | 0.576944044 | 0.576944044 | -5.473541436 |
| 1427783_at   | -0.046288361 | 3.20447497  | -0.577831895 | 0.576949886 | 0.576949886 | -5.47354628  |
| 1458664_at   | -0.040161711 | 4.856839607 | -0.577831056 | 0.576950429 | 0.576950429 | -5.47354673  |
| 1437488_at   | -0.050740611 | 3.878965381 | -0.577802907 | 0.576968671 | 0.576968671 | -5.473561855 |
| 1428299_at   | -0.049612521 | 8.629634624 | -0.577667623 | 0.577056344 | 0.577056344 | -5.473634536 |
| 1432894_at   | 0.039821537  | 3.386284438 | 0.577501317  | 0.577164132 | 0.577164132 | -5.473723862 |
| 1435923_at   | 0.053259476  | 9.228428351 | 0.57749642   | 0.577167306 | 0.577167306 | -5.473726492 |
| 1435093_at   | 0.083436499  | 7.953163396 | 0.577490884  | 0.577170894 | 0.577170894 | -5.473729465 |
| 1438259_at   | 0.111608069  | 7.779027354 | 0.577438235  | 0.57720502  | 0.57720502  | -5.473757738 |
| 1422524_at   | -0.044959658 | 7.389922292 | -0.577341731 | 0.577267575 | 0.577267575 | -5.473809556 |
| 1425601_a_at | 0.044859758  | 8.28375559  | 0.577340791  | 0.577268184 | 0.577268184 | -5.47381006  |
| 1421862_a_at | -0.04350465  | 4.443549847 | -0.577295354 | 0.577297638 | 0.577297638 | -5.473834455 |
| 1459698_at   | 0.076519595  | 5.116120214 | 0.577281171  | 0.577306832 | 0.577306832 | -5.473842069 |
| 1460297_at   | -0.038545154 | 3.820093267 | -0.577259777 | 0.577320701 | 0.577320701 | -5.473853555 |
| 1441917_s_at | 0.059495234  | 5.970087435 | 0.577152354  | 0.577390341 | 0.577390341 | -5.473911218 |
| 1459030_at   | -0.063617519 | 4.044222815 | -0.577038351 | 0.577464252 | 0.577464252 | -5.473972403 |
| 1431197_at   | -0.043580062 | 7.234943785 | -0.576965066 | 0.577511766 | 0.577511766 | -5.474011729 |
| 1456290_x_at | -0.046420199 | 7.780223008 | -0.576912293 | 0.577545984 | 0.577545984 | -5.474040045 |
| 1422675_at   | 0.040533512  | 9.947988504 | 0.576909636  | 0.577547707 | 0.577547707 | -5.474041471 |
| 1447021_at   | 0.045496394  | 3.84344361  | 0.576905872  | 0.577550147 | 0.577550147 | -5.47404349  |
| 1431260_at   | -0.073028435 | 4.301832623 | -0.576877297 | 0.577568676 | 0.577568676 | -5.474058822 |
| 1426247_at   | 0.048260927  | 8.037037772 | 0.576798831  | 0.577619555 | 0.577619555 | -5.474100916 |
| 1448784_at   | -0.044433797 | 10.07408493 | -0.576716459 | 0.57767297  | 0.57767297  | -5.474145101 |
| 1420710_at   | -0.052251402 | 4.620676641 | -0.576676795 | 0.577698691 | 0.577698691 | -5.474166375 |
| 1449116_a_at | -0.040843682 | 9.478546111 | -0.576644819 | 0.577719428 | 0.577719428 | -5.474183525 |
| 1417403_at   | 0.037453447  | 8.68506748  | 0.576618028  | 0.577736802 | 0.577736802 | -5.474197893 |
| 1421900_at   | 0.039544415  | 8.472466033 | 0.576612393  | 0.577740456 | 0.577740456 | -5.474200915 |
| 1444573_at   | 0.044580292  | 4.133177974 | 0.576592495  | 0.57775336  | 0.57775336  | -5.474211585 |
| 1459140_at   | -0.057772457 | 5.509081446 | -0.576580438 | 0.57776118  | 0.57776118  | -5.474218051 |
| 1431322_at   | -0.051926278 | 9.532639357 | -0.576544363 | 0.577784576 | 0.577784576 | -5.474237396 |
| 1426676_s_at | 0.046342946  | 8.837928757 | 0.576443384  | 0.577850067 | 0.577850067 | -5.474291539 |
| 1449795_at   | 0.047706446  | 3.509157662 | 0.57638421   | 0.577888447 | 0.577888447 | -5.474323263 |
| 1416180_a_at | 0.087734686  | 9.439147823 | 0.576349449  | 0.577910993 | 0.577910993 | -5.474341897 |
| 1458011_s_at | 0.051204603  | 4.123327109 | 0.576345791  | 0.577913366 | 0.577913366 | -5.474343858 |
| 1458297_s_at | 0.050867839  | 3.999328958 | 0.576279871  | 0.577956124 | 0.577956124 | -5.474379193 |
| 1452867_at   | 0.056118446  | 10.21659308 | 0.576253188  | 0.577973432 | 0.577973432 | -5.474393494 |
| 1444005_at   | -0.06701699  | 5.639438768 | -0.576208025 | 0.578002728 | 0.578002728 | -5.474417699 |
| 1424175_at   | -0.038809442 | 8.938013362 | -0.576131391 | 0.57805244  | 0.57805244  | -5.474458768 |
| 1440760_at   | 0.081130091  | 4.462731693 | 0.576109634  | 0.578066554 | 0.578066554 | -5.474470427 |
| 1434867_at   | -0.046319596 | 6.320936256 | -0.576008077 | 0.578132438 | 0.578132438 | -5.474524842 |
| 1449388_at   | -0.211082961 | 7.015502127 | -0.575992829 | 0.578142331 | 0.578142331 | -5.474533011 |
| 1446544_at   | -0.04828832  | 5.388787118 | -0.575974848 | 0.578153996 | 0.578153996 | -5.474542644 |
| 1421224_a_at | -0.05464711  | 4.388801293 | -0.575929248 | 0.57818358  | 0.57818358  | -5.474567073 |
| 1442228_at   | -0.046766601 | 3.749759617 | -0.575861222 | 0.578227715 | 0.578227715 | -5.474603512 |
| 1444715_at   | 0.055376544  | 5.278975739 | 0.575768265  | 0.578288029 | 0.578288029 | -5.474653299 |
| 1430710_at   | 0.050831736  | 4.409943306 | 0.575768161  | 0.578288097 | 0.578288097 | -5.474653355 |
| 1453068_at   | 0.052260288  | 8.890019512 | 0.575745676  | 0.578302686 | 0.578302686 | -5.474665397 |
| 1454295_at   | 0.077091846  | 8.119244584 | 0.575708394  | 0.578326878 | 0.578326878 | -5.474685362 |
| 1424562_a_at | 0.037103701  | 12.31633179 | 0.575661684  | 0.578357187 | 0.578357187 | -5.474710375 |
| 1415942_at   | -0.03409118  | 13.67742639 | -0.575649422 | 0.578365144 | 0.578365144 | -5.474716941 |
| 1448358_s_at | 0.039319004  | 11.97043785 | 0.575623896  | 0.578381708 | 0.578381708 | -5.474730608 |
| 1437815_at   | -0.04743681  | 3.685696712 | -0.575621455 | 0.578383292 | 0.578383292 | -5.474731915 |
| 1423799_at   | 0.037471092  | 11.16511377 | 0.575582644  | 0.578408477 | 0.578408477 | -5.474752695 |

|              |              |             |              |             |             |              |
|--------------|--------------|-------------|--------------|-------------|-------------|--------------|
| 1456845_at   | -0.054728849 | 5.214608736 | -0.575539383 | 0.578436551 | 0.578436551 | -5.474775856 |
| 1439903_at   | -0.049560692 | 4.071473245 | -0.575538772 | 0.578436948 | 0.578436948 | -5.474776183 |
| 1439643_at   | 0.051303324  | 8.079083421 | 0.575402402  | 0.578525448 | 0.578525448 | -5.474849182 |
| 1422086_at   | 0.047242531  | 5.205687837 | 0.575379824  | 0.578540101 | 0.578540101 | -5.474861267 |
| 1443219_at   | -0.069420463 | 8.988652633 | -0.575349931 | 0.578559502 | 0.578559502 | -5.474877266 |
| 1446438_at   | 0.098442156  | 4.705327675 | 0.575265664  | 0.578614194 | 0.578614194 | -5.474922362 |
| 1436836_x_at | 0.037568948  | 12.73791151 | 0.575200766  | 0.578656318 | 0.578656318 | -5.474957089 |
| 1448241_at   | -0.042930312 | 8.62472739  | -0.575173275 | 0.578674161 | 0.578674161 | -5.474971798 |
| 1430454_x_at | -0.048126023 | 5.189584419 | -0.575115676 | 0.578711549 | 0.578711549 | -5.475002615 |
| 1432357_at   | -0.040935704 | 3.846166795 | -0.575096989 | 0.57872368  | 0.57872368  | -5.475012613 |
| 1429089_s_at | 0.046241361  | 9.350770024 | 0.575027099  | 0.578769048 | 0.578769048 | -5.47505     |
| 1438686_at   | 0.067034796  | 8.320234779 | 0.574996545  | 0.578788882 | 0.578788882 | -5.475066344 |
| 1444060_at   | -0.046851714 | 4.880024558 | -0.57497251  | 0.578804484 | 0.578804484 | -5.4750792   |
| 1421888_x_at | -0.042687528 | 7.059693081 | -0.574931893 | 0.578830852 | 0.578830852 | -5.475100924 |
| 1449839_at   | -0.03478075  | 9.729974696 | -0.574907835 | 0.578846471 | 0.578846471 | -5.475113791 |
| 1436737_a_at | 0.072319642  | 7.143574972 | 0.574872382  | 0.578869487 | 0.578869487 | -5.475132751 |
| 1422504_at   | -0.077310494 | 4.447837564 | -0.5748705   | 0.578870709 | 0.578870709 | -5.475133758 |
| 1438528_at   | -0.04901031  | 8.084800775 | -0.574869377 | 0.578871438 | 0.578871438 | -5.475134359 |
| 1440449_at   | -0.063244377 | 4.22871728  | -0.574848784 | 0.578884807 | 0.578884807 | -5.475145371 |
| 1450399_at   | -0.036719369 | 8.669163874 | -0.574839267 | 0.578890986 | 0.578890986 | -5.47515046  |
| 1436846_x_at | 0.042429882  | 10.89228889 | 0.574831934  | 0.578895747 | 0.578895747 | -5.475154382 |
| 1454336_at   | 0.040143038  | 4.726390833 | 0.574825452  | 0.578899955 | 0.578899955 | -5.475157848 |
| 1424836_a_at | -0.086963572 | 8.734190263 | -0.574809455 | 0.578910341 | 0.578910341 | -5.475166402 |
| 1444870_at   | 0.04771463   | 3.560684858 | 0.57480904   | 0.57891061  | 0.57891061  | -5.475166624 |
| 1429586_at   | -0.045199495 | 6.65886213  | -0.574752928 | 0.578947041 | 0.578947041 | -5.475196628 |
| 1427732_s_at | -0.038684012 | 6.485512956 | -0.574687405 | 0.578989583 | 0.578989583 | -5.47523166  |
| 1453479_at   | -0.037558209 | 4.863562094 | -0.574622783 | 0.579031542 | 0.579031542 | -5.475266207 |
| 1449344_s_at | -0.057971674 | 3.577117726 | -0.574602578 | 0.579044661 | 0.579044661 | -5.475277008 |
| 1439445_x_at | 0.05152642   | 3.187332704 | 0.57449246   | 0.579116165 | 0.579116165 | -5.475335867 |
| 1426907_s_at | -0.040785801 | 8.437302936 | -0.574457225 | 0.579139046 | 0.579139046 | -5.475354698 |
| 1454463_at   | -0.069021458 | 5.015703113 | -0.574385194 | 0.579185822 | 0.579185822 | -5.475393192 |
| 1434068_s_at | 0.122333957  | 4.69818224  | 0.574383323  | 0.579187037 | 0.579187037 | -5.475394191 |
| 1422995_at   | 0.073285102  | 5.235238074 | 0.574376621  | 0.579191389 | 0.579191389 | -5.475397773 |
| 1423404_at   | -0.041046058 | 3.62707096  | -0.574248359 | 0.579274687 | 0.579274687 | -5.475466304 |
| 1442345_at   | -0.040051607 | 3.254344415 | -0.574187605 | 0.579314145 | 0.579314145 | -5.47549876  |
| 1421719_at   | 0.047664012  | 4.848051526 | 0.574148946  | 0.579339254 | 0.579339254 | -5.475519411 |
| 1428598_at   | 0.04451227   | 7.621377937 | 0.574145817  | 0.579341286 | 0.579341286 | -5.475521083 |
| 1428329_a_at | -0.040631333 | 7.846141387 | -0.574136549 | 0.579347306 | 0.579347306 | -5.475526033 |
| 1426423_at   | 0.043840772  | 8.571979985 | 0.574122797  | 0.579356238 | 0.579356238 | -5.475533379 |
| 1431990_at   | -0.048759604 | 4.659873056 | -0.574108477 | 0.579365539 | 0.579365539 | -5.475541028 |
| 1426288_at   | 0.060557972  | 6.887384279 | 0.574095484  | 0.579373978 | 0.579373978 | -5.475547968 |
| 1446992_at   | -0.054592211 | 3.797801029 | -0.574011222 | 0.579428709 | 0.579428709 | -5.47559297  |
| 1440352_at   | -0.053721214 | 4.786470612 | -0.573971108 | 0.579454766 | 0.579454766 | -5.475614393 |
| 1445271_at   | 0.091916882  | 5.206857334 | 0.573963052  | 0.579459999 | 0.579459999 | -5.475618695 |
| 1435775_at   | -0.045120928 | 6.84783595  | -0.573912088 | 0.579493104 | 0.579493104 | -5.475645909 |
| 1450141_at   | -0.047392043 | 4.936211812 | -0.573909473 | 0.579494803 | 0.579494803 | -5.475647305 |
| 1444430_at   | 0.052952418  | 6.906760325 | 0.573903617  | 0.579498607 | 0.579498607 | -5.475650432 |
| 1417197_at   | -0.048488357 | 5.942353464 | -0.573899585 | 0.579501226 | 0.579501226 | -5.475652585 |
| 1447907_x_at | -0.05580316  | 4.949625728 | -0.573887592 | 0.579509017 | 0.579509017 | -5.475658988 |
| 1430214_a_at | 0.046331819  | 7.420472187 | 0.573853862  | 0.579530928 | 0.579530928 | -5.475676998 |
| 1433913_at   | -0.056290479 | 8.631455747 | -0.573813835 | 0.579556931 | 0.579556931 | -5.475698368 |
| 1433808_at   | -0.039426312 | 7.740374951 | -0.573794553 | 0.579569457 | 0.579569457 | -5.475708662 |
| 1441649_at   | 0.046838087  | 6.957605818 | 0.573781385  | 0.579578012 | 0.579578012 | -5.475715692 |

|              |              |             |              |             |             |              |
|--------------|--------------|-------------|--------------|-------------|-------------|--------------|
| 1432308_at   | -0.050888967 | 4.589755294 | -0.573768426 | 0.57958643  | 0.57958643  | -5.47572261  |
| 1432102_at   | -0.041168679 | 3.235948052 | -0.573756257 | 0.579594336 | 0.579594336 | -5.475729106 |
| 1425845_a_at | -0.048863432 | 7.975973943 | -0.573706729 | 0.579626513 | 0.579626513 | -5.475755545 |
| 1432011_at   | -0.061331129 | 6.130024147 | -0.573668032 | 0.579651654 | 0.579651654 | -5.4757762   |
| 1416660_at   | -0.049458234 | 10.02919068 | -0.573600567 | 0.579695486 | 0.579695486 | -5.475812208 |
| 1435723_at   | -0.044968478 | 6.289565042 | -0.573553927 | 0.579725789 | 0.579725789 | -5.475837098 |
| 1446862_at   | 0.048120094  | 3.999301648 | 0.573462583  | 0.57978514  | 0.57978514  | -5.475885841 |
| 1436245_at   | 0.062910092  | 3.769593228 | 0.573442863  | 0.579797954 | 0.579797954 | -5.475896363 |
| 1441175_at   | -0.056951044 | 6.599385573 | -0.573433946 | 0.579803748 | 0.579803748 | -5.47590112  |
| 1431223_at   | 0.052721731  | 4.156554045 | 0.573361278  | 0.579850968 | 0.579850968 | -5.47593989  |
| 1420800_a_at | 0.051726103  | 5.05728523  | 0.573350982  | 0.579857658 | 0.579857658 | -5.475945383 |
| 1421237_at   | -0.066482459 | 6.917748347 | -0.573328168 | 0.579872483 | 0.579872483 | -5.475957554 |
| 1447298_at   | -0.051317956 | 3.611513657 | -0.573271055 | 0.579909598 | 0.579909598 | -5.47598802  |
| 1437057_at   | -0.083556273 | 8.705752332 | -0.573239642 | 0.579930011 | 0.579930011 | -5.476004775 |
| 1415878_at   | 0.035964196  | 9.764091585 | 0.573226066  | 0.579938834 | 0.579938834 | -5.476012017 |
| 1436565_at   | 0.045574006  | 3.529376642 | 0.57314181   | 0.57999359  | 0.57999359  | -5.476056953 |
| 1434857_at   | 0.055588934  | 8.499082014 | 0.573128682  | 0.580002123 | 0.580002123 | -5.476063955 |
| 1426059_at   | 0.059428068  | 4.747082607 | 0.573115431  | 0.580010735 | 0.580010735 | -5.476071021 |
| 1434167_at   | 0.04238326   | 6.493263233 | 0.573111486  | 0.580013298 | 0.580013298 | -5.476073125 |
| 1420762_a_at | -0.048605718 | 6.538286371 | -0.573107109 | 0.580016143 | 0.580016143 | -5.476075459 |
| 1444513_at   | 0.048053838  | 4.819868196 | 0.573056684  | 0.580048916 | 0.580048916 | -5.476102348 |
| 1451379_at   | 0.038461756  | 8.034365367 | 0.573052455  | 0.580051665 | 0.580051665 | -5.476104604 |
| 1440579_at   | -0.036731516 | 8.223464411 | -0.572951976 | 0.580116971 | 0.580116971 | -5.476158177 |
| 1427698_at   | -0.040487724 | 4.935609096 | -0.57290946  | 0.580144606 | 0.580144606 | -5.476180843 |
| 1449738_s_at | 0.049092636  | 9.495533352 | 0.572836244  | 0.580192197 | 0.580192197 | -5.476219872 |
| 1422379_x_at | 0.0464649    | 3.476630416 | 0.572826187  | 0.580198734 | 0.580198734 | -5.476225233 |
| 1459077_at   | -0.045065869 | 3.719130047 | -0.57281424  | 0.5802065   | 0.5802065   | -5.476231601 |
| 1422713_a_at | 0.055252235  | 7.597545928 | 0.572810174  | 0.580209143 | 0.580209143 | -5.476233768 |
| 1451188_at   | 0.047065731  | 10.36042097 | 0.572796747  | 0.580217871 | 0.580217871 | -5.476240925 |
| 1451074_at   | 0.059530041  | 9.380067815 | 0.572779243  | 0.58022925  | 0.58022925  | -5.476250254 |
| 1416371_at   | 0.068259954  | 7.677399868 | 0.572773773  | 0.580232805 | 0.580232805 | -5.47625317  |
| 1423103_at   | 0.047516064  | 8.849395707 | 0.572746031  | 0.580250839 | 0.580250839 | -5.476267955 |
| 1450830_a_at | -0.04936668  | 3.80457779  | -0.572719681 | 0.580267968 | 0.580267968 | -5.476281999 |
| 1453728_a_at | 0.033906606  | 10.1116919  | 0.572663919  | 0.580304218 | 0.580304218 | -5.476311715 |
| 1450318_a_at | -0.049105591 | 4.823106689 | -0.572643174 | 0.580317704 | 0.580317704 | -5.47632277  |
| 1459015_at   | 0.038963205  | 4.266617392 | 0.572631358  | 0.580325386 | 0.580325386 | -5.476329066 |
| 1421216_a_at | -0.05701278  | 6.122072184 | -0.572509075 | 0.580404886 | 0.580404886 | -5.47639422  |
| 1439118_at   | 0.058093571  | 4.036222348 | 0.572464731  | 0.580433716 | 0.580433716 | -5.476417843 |
| 1427165_at   | 0.051224288  | 7.086406956 | 0.572424454  | 0.580459904 | 0.580459904 | -5.476439299 |
| 1443649_at   | 0.058008171  | 7.649551617 | 0.572298837  | 0.580541581 | 0.580541581 | -5.476506206 |
| 1431773_at   | 0.073840059  | 5.228371006 | 0.572239384  | 0.58058024  | 0.58058024  | -5.476537868 |
| 1416045_a_at | 0.03814701   | 9.988462321 | 0.572228158  | 0.58058754  | 0.58058754  | -5.476543846 |
| 1416976_at   | -0.038283698 | 7.237855957 | -0.5722273   | 0.580588098 | 0.580588098 | -5.476544303 |
| 1416339_a_at | -0.041551518 | 9.979111581 | -0.572200726 | 0.580605379 | 0.580605379 | -5.476558454 |
| 1455879_at   | -0.043151476 | 4.927518235 | -0.572155459 | 0.580634815 | 0.580634815 | -5.476582557 |
| 1432516_at   | 0.043536176  | 3.134057062 | 0.572126406  | 0.580653708 | 0.580653708 | -5.476598026 |
| 1457742_at   | 0.040167738  | 6.051645495 | 0.572106009  | 0.580666972 | 0.580666972 | -5.476608886 |
| 1430748_at   | 0.050330159  | 4.896759222 | 0.5720934    | 0.580675172 | 0.580675172 | -5.476615599 |
| 1458947_at   | -0.067928145 | 8.93527099  | -0.572019122 | 0.580723478 | 0.580723478 | -5.476655142 |
| 1430464_at   | 0.046455679  | 4.549793435 | 0.572011335  | 0.580728542 | 0.580728542 | -5.476659287 |
| 1451034_at   | -0.053642993 | 6.255527084 | -0.572007011 | 0.580731354 | 0.580731354 | -5.476661589 |
| 1458573_at   | -0.047476854 | 3.960920085 | -0.571996514 | 0.580738181 | 0.580738181 | -5.476667177 |
| 1445955_at   | -0.052425333 | 6.13207966  | -0.57196981  | 0.580755548 | 0.580755548 | -5.476681392 |

|              |              |             |              |             |             |              |
|--------------|--------------|-------------|--------------|-------------|-------------|--------------|
| 1436926_at   | 0.036228851  | 4.265279614 | 0.571961091  | 0.580761218 | 0.580761218 | -5.476686033 |
| 1418354_at   | -0.045466686 | 7.518580995 | -0.571900865 | 0.580800389 | 0.580800389 | -5.476718089 |
| 1440442_at   | -0.080158454 | 5.412738015 | -0.571868758 | 0.580821271 | 0.580821271 | -5.476735177 |
| 1446930_at   | 0.04929504   | 3.967917058 | 0.571772946  | 0.58088359  | 0.58088359  | -5.476786165 |
| 1451800_at   | 0.093755521  | 4.720482492 | 0.571644611  | 0.580967068 | 0.580967068 | -5.476854448 |
| 1455119_at   | -0.066923343 | 4.538256964 | -0.57163909  | 0.580970659 | 0.580970659 | -5.476857385 |
| 1432029_a_at | -0.052691659 | 8.750252213 | -0.571637204 | 0.580971886 | 0.580971886 | -5.476858388 |
| 1441638_at   | -0.056867154 | 4.146985063 | -0.571600476 | 0.580995778 | 0.580995778 | -5.476877927 |
| 1454494_at   | -0.055921558 | 4.458951201 | -0.571586063 | 0.581005154 | 0.581005154 | -5.476885594 |
| 1424033_at   | 0.052219754  | 10.51746521 | 0.571585766  | 0.581005347 | 0.581005347 | -5.476885752 |
| 1424443_at   | -0.112855311 | 7.002975741 | -0.571538419 | 0.581036148 | 0.581036148 | -5.476910938 |
| 1444209_at   | -0.035634281 | 3.389039948 | -0.571537185 | 0.58103695  | 0.58103695  | -5.476911595 |
| 1441068_at   | -0.059651474 | 6.628623981 | -0.571528786 | 0.581042414 | 0.581042414 | -5.476916062 |
| 1436900_x_at | 0.059286879  | 9.168529695 | 0.571528417  | 0.581042655 | 0.581042655 | -5.476916259 |
| 1435187_at   | 0.043441248  | 7.552930543 | 0.571497769  | 0.581062593 | 0.581062593 | -5.47693256  |
| 1435223_at   | -0.045633649 | 8.851163335 | -0.571475949 | 0.581076788 | 0.581076788 | -5.476944166 |
| 1443880_at   | 0.065004981  | 7.540248867 | 0.571433895  | 0.581104147 | 0.581104147 | -5.476966532 |
| 1434877_at   | 0.082540554  | 4.239382435 | 0.571414789  | 0.581116577 | 0.581116577 | -5.476976693 |
| 1442085_at   | 0.067995118  | 5.961785849 | 0.571403166  | 0.581124139 | 0.581124139 | -5.476982875 |
| 1426643_at   | -0.036739145 | 9.213020412 | -0.571383691 | 0.581136809 | 0.581136809 | -5.476993231 |
| 1426525_at   | 0.034471867  | 10.93682865 | 0.571359385  | 0.581152622 | 0.581152622 | -5.477006156 |
| 1426522_at   | -0.043212187 | 10.22855713 | -0.571307994 | 0.581186058 | 0.581186058 | -5.477033483 |
| 1417386_at   | -0.062496641 | 9.413277213 | -0.5712375   | 0.581231925 | 0.581231925 | -5.477070965 |
| 1456779_a_at | 0.049487871  | 5.359801209 | 0.571224405  | 0.581240445 | 0.581240445 | -5.477077927 |
| 1437677_at   | -0.042031744 | 5.926229071 | -0.571188393 | 0.581263878 | 0.581263878 | -5.477097072 |
| 1426317_at   | 0.055308103  | 5.784728085 | 0.571154653  | 0.581285832 | 0.581285832 | -5.477115009 |
| 1423375_at   | 0.058028782  | 7.277956279 | 0.571114547  | 0.581311929 | 0.581311929 | -5.477136328 |
| 1440636_at   | 0.051949494  | 6.087292586 | 0.571103898  | 0.581318858 | 0.581318858 | -5.477141989 |
| 1456086_x_at | -0.038113415 | 9.607521081 | -0.571072514 | 0.58133928  | 0.58133928  | -5.47715867  |
| 1449040_a_at | 0.057605046  | 8.019102503 | 0.571030801  | 0.581366424 | 0.581366424 | -5.477180841 |
| 1426001_at   | 0.058518772  | 4.858507173 | 0.571009911  | 0.581380018 | 0.581380018 | -5.477191943 |
| 1450696_at   | -0.05550816  | 5.71842426  | -0.570972028 | 0.581404671 | 0.581404671 | -5.477212076 |
| 1452192_at   | 0.047653195  | 9.261145784 | 0.570861451  | 0.581476633 | 0.581476633 | -5.477270836 |
| 1431249_at   | -0.041801835 | 5.150300721 | -0.570808834 | 0.581510877 | 0.581510877 | -5.477298792 |
| 1448648_at   | -0.046054881 | 8.55079158  | -0.57079334  | 0.581520961 | 0.581520961 | -5.477307023 |
| 1455376_at   | -0.040931675 | 7.745369236 | -0.570775705 | 0.581532439 | 0.581532439 | -5.477316393 |
| 1426930_at   | -0.058764842 | 7.036257757 | -0.570763869 | 0.581540142 | 0.581540142 | -5.47732268  |
| 1445007_at   | -0.044240558 | 4.377000525 | -0.57074705  | 0.581551088 | 0.581551088 | -5.477331616 |
| 1434007_at   | 0.05730525   | 6.220617096 | 0.570741759  | 0.581554532 | 0.581554532 | -5.477334426 |
| 1430928_at   | 0.039586025  | 3.98740577  | 0.570690867  | 0.581587656 | 0.581587656 | -5.477361461 |
| 1449920_at   | 0.0358093    | 4.282491458 | 0.570628575  | 0.581628201 | 0.581628201 | -5.477394548 |
| 1450113_at   | -0.05750229  | 7.818383414 | -0.570561634 | 0.581671774 | 0.581671774 | -5.477430102 |
| 1451230_a_at | 0.03508144   | 12.91123587 | 0.570508671  | 0.58170625  | 0.58170625  | -5.477458228 |
| 1429618_at   | -0.042070645 | 7.930787991 | -0.570431573 | 0.581756438 | 0.581756438 | -5.477499168 |
| 1426671_a_at | 0.059788968  | 10.11586627 | 0.57040069   | 0.581776542 | 0.581776542 | -5.477515565 |
| 1435291_at   | 0.060486742  | 8.556534832 | 0.570330555  | 0.5818222   | 0.5818222   | -5.477552801 |
| 1448490_at   | -0.039794518 | 7.424106729 | -0.570323018 | 0.581827107 | 0.581827107 | -5.477556802 |
| 1443597_at   | 0.046542272  | 4.230748375 | 0.570315743  | 0.581831843 | 0.581831843 | -5.477560664 |
| 1455837_at   | 0.049680921  | 5.18860651  | 0.570302763  | 0.581840294 | 0.581840294 | -5.477567554 |
| 1450320_at   | 0.061767932  | 3.788977259 | 0.570285238  | 0.581851703 | 0.581851703 | -5.477576858 |
| 1421812_at   | 0.04245645   | 8.740609562 | 0.570123262  | 0.58195716  | 0.58195716  | -5.47766283  |
| 1448545_at   | 0.073372659  | 9.78326944  | 0.570112774  | 0.581963989 | 0.581963989 | -5.477668396 |
| 1440332_at   | -0.046998999 | 7.452259453 | -0.57011031  | 0.581965593 | 0.581965593 | -5.477669704 |

|              |              |             |              |             |             |              |
|--------------|--------------|-------------|--------------|-------------|-------------|--------------|
| 1447282_at   | -0.03871881  | 4.978312164 | -0.570102305 | 0.581970806 | 0.581970806 | -5.477673952 |
| 1451090_a_at | -0.106303512 | 10.78481271 | -0.570081379 | 0.581984431 | 0.581984431 | -5.477685057 |
| 1427589_at   | -0.053970033 | 4.126478436 | -0.570020738 | 0.582023916 | 0.582023916 | -5.477717236 |
| 1440937_at   | -0.04798767  | 5.629409365 | -0.56999528  | 0.582040493 | 0.582040493 | -5.477730744 |
| 1443606_at   | -0.036013142 | 4.537539118 | -0.569885258 | 0.582112136 | 0.582112136 | -5.477789116 |
| 1459705_at   | 0.049921841  | 3.38550872  | 0.569845615  | 0.582137952 | 0.582137952 | -5.477810146 |
| 1417107_at   | -0.04129485  | 7.616406955 | -0.569819052 | 0.58215525  | 0.58215525  | -5.477824236 |
| 1418632_at   | -0.053671897 | 8.282464891 | -0.569762997 | 0.582191755 | 0.582191755 | -5.477853969 |
| 1447921_at   | 0.076398376  | 6.095907488 | 0.569713348  | 0.582224089 | 0.582224089 | -5.477880302 |
| 1429262_at   | -0.067160684 | 4.953619557 | -0.569699896 | 0.58223285  | 0.58223285  | -5.477887436 |
| 1438485_at   | -0.058661041 | 8.263887364 | -0.569692469 | 0.582237687 | 0.582237687 | -5.477891374 |
| 1455430_at   | 0.040864822  | 8.3693212   | 0.569611066  | 0.582290704 | 0.582290704 | -5.477934542 |
| 1425278_at   | 0.043831186  | 5.259868524 | 0.569608155  | 0.5822926   | 0.5822926   | -5.477936086 |
| 1427883_a_at | -0.038918956 | 13.79010739 | -0.569537549 | 0.582338587 | 0.582338587 | -5.477973523 |
| 1430198_at   | -0.051187541 | 3.999345125 | -0.569536854 | 0.582339039 | 0.582339039 | -5.477973892 |
| 1434603_at   | -0.048664482 | 9.990534893 | -0.569420879 | 0.582414581 | 0.582414581 | -5.478035376 |
| 1443633_at   | -0.048181899 | 5.107404602 | -0.569305777 | 0.582489558 | 0.582489558 | -5.478096386 |
| 1459990_at   | -0.049562859 | 6.543238484 | -0.569293614 | 0.582497482 | 0.582497482 | -5.478102832 |
| 1456946_at   | -0.053281006 | 5.838697139 | -0.569285094 | 0.582503032 | 0.582503032 | -5.478107348 |
| 1432701_at   | -0.044606441 | 3.851536194 | -0.56927016  | 0.582512761 | 0.582512761 | -5.478115262 |
| 1443227_at   | 0.076626713  | 6.516359081 | 0.569242081  | 0.582531052 | 0.582531052 | -5.478130143 |
| 1430842_at   | -0.058871985 | 3.522407772 | -0.569212718 | 0.582550181 | 0.582550181 | -5.478145703 |
| 1434521_at   | -0.036586266 | 8.963918738 | -0.569178781 | 0.58257229  | 0.58257229  | -5.478163687 |
| 1420705_at   | -0.069979628 | 4.157029525 | -0.569163967 | 0.582581941 | 0.582581941 | -5.478171537 |
| 1437139_at   | -0.04394842  | 3.206874223 | -0.569157317 | 0.582586273 | 0.582586273 | -5.47817506  |
| 1426770_at   | -0.057086226 | 7.728296163 | -0.569119831 | 0.582610695 | 0.582610695 | -5.478194923 |
| 1455885_at   | -0.042731154 | 4.641124508 | -0.569103623 | 0.582621255 | 0.582621255 | -5.47820351  |
| 1422164_at   | -0.057622183 | 4.746699278 | -0.569071476 | 0.582642199 | 0.582642199 | -5.478220542 |
| 1433655_at   | -0.049912268 | 7.751267685 | -0.569067097 | 0.582645052 | 0.582645052 | -5.478222862 |
| 1436534_at   | 0.04745554   | 9.792800125 | 0.568992801  | 0.582693459 | 0.582693459 | -5.478262221 |
| 1442957_at   | 0.040276208  | 3.767314295 | 0.568967511  | 0.582709936 | 0.582709936 | -5.478275618 |
| 1444104_at   | 0.056572546  | 4.263441023 | 0.568963     | 0.582712876 | 0.582712876 | -5.478278008 |
| 1448934_at   | 0.049190177  | 10.9634899  | 0.568868622  | 0.58277437  | 0.58277437  | -5.478327996 |
| 1431554_a_at | -0.095234735 | 4.335136732 | -0.568867    | 0.582775427 | 0.582775427 | -5.478328855 |
| 1442762_at   | -0.060379321 | 5.536556033 | -0.568852603 | 0.582784808 | 0.582784808 | -5.47833648  |
| 1454411_at   | -0.041451555 | 5.12248678  | -0.568838222 | 0.582794179 | 0.582794179 | -5.478344096 |
| 1444162_at   | 0.045874643  | 3.821486398 | 0.568827455  | 0.582801195 | 0.582801195 | -5.478349798 |
| 1459036_at   | -0.054343413 | 4.154450517 | -0.568822835 | 0.582804205 | 0.582804205 | -5.478352245 |
| 1460201_a_at | 0.037765998  | 13.26207542 | 0.568783949  | 0.582829545 | 0.582829545 | -5.478372838 |
| 1444884_at   | -0.056910112 | 3.893653836 | -0.568779425 | 0.582832493 | 0.582832493 | -5.478375234 |
| 1450850_at   | -0.052347203 | 8.613111956 | -0.56877511  | 0.582835304 | 0.582835304 | -5.478377519 |
| 1452403_a_at | -0.042372953 | 4.961298339 | -0.568732811 | 0.582862868 | 0.582862868 | -5.478399917 |
| 1458165_at   | 0.048371703  | 5.92173627  | 0.568728726  | 0.58286553  | 0.58286553  | -5.47840208  |
| 1440342_at   | -0.084146848 | 3.833896737 | -0.568723959 | 0.582868637 | 0.582868637 | -5.478404604 |
| 1433081_at   | -0.065993287 | 4.101209361 | -0.568704271 | 0.582881467 | 0.582881467 | -5.478415029 |
| 1441243_at   | 0.060465974  | 6.179207976 | 0.56867295   | 0.582901878 | 0.582901878 | -5.478431613 |
| 1431263_at   | -0.059412918 | 3.40513399  | -0.568632932 | 0.582927957 | 0.582927957 | -5.478452799 |
| 1435016_at   | 0.044087205  | 7.968912254 | 0.568617888  | 0.58293776  | 0.58293776  | -5.478460764 |
| 1450902_at   | -0.069293264 | 8.439970786 | -0.56858282  | 0.582960614 | 0.582960614 | -5.478479329 |
| 1425255_s_at | 0.038529987  | 11.25324253 | 0.568562332  | 0.582973967 | 0.582973967 | -5.478490175 |
| 1440214_at   | -0.049696226 | 4.677030494 | -0.568548125 | 0.582983226 | 0.582983226 | -5.478497695 |
| 1418040_at   | 0.054710271  | 6.791879762 | 0.56854453   | 0.582985569 | 0.582985569 | -5.478499598 |
| 1459670_at   | 0.05823327   | 6.610331548 | 0.568535708  | 0.582991319 | 0.582991319 | -5.478504268 |

|              |              |             |              |             |             |              |
|--------------|--------------|-------------|--------------|-------------|-------------|--------------|
| 1427496_at   | -0.053392242 | 7.558020899 | -0.5684761   | 0.583030168 | 0.583030168 | -5.478535819 |
| 1428474_at   | 0.0617143    | 5.295311979 | 0.568460011  | 0.583040654 | 0.583040654 | -5.478544335 |
| 1424591_at   | 0.088231604  | 8.040499907 | 0.568457334  | 0.583042399 | 0.583042399 | -5.478545752 |
| 1426223_at   | 0.049388111  | 7.73031476  | 0.568443229  | 0.583051592 | 0.583051592 | -5.478553217 |
| 1432981_at   | -0.049146334 | 3.47620797  | -0.568437332 | 0.583055435 | 0.583055435 | -5.478556338 |
| 1458017_at   | 0.052637878  | 7.189001279 | 0.568408823  | 0.583074016 | 0.583074016 | -5.478571426 |
| 1458582_at   | 0.070219485  | 6.050204945 | 0.568404604  | 0.583076766 | 0.583076766 | -5.478573659 |
| 1448831_at   | 0.054471103  | 6.493476553 | 0.568402055  | 0.583078428 | 0.583078428 | -5.478575008 |
| 1434418_at   | -0.054106056 | 8.061856301 | -0.568345325 | 0.583115404 | 0.583115404 | -5.478605029 |
| 1458070_at   | -0.04641895  | 4.061525037 | -0.568335448 | 0.583121842 | 0.583121842 | -5.478610256 |
| 1453018_at   | 0.059363934  | 7.478350041 | 0.568328919  | 0.583126098 | 0.583126098 | -5.478613711 |
| 1435428_at   | 0.056647186  | 6.629764782 | 0.568325922  | 0.583128051 | 0.583128051 | -5.478615297 |
| 1435969_at   | 0.041928977  | 7.508004217 | 0.568307197  | 0.583140256 | 0.583140256 | -5.478625205 |
| 1440261_at   | 0.045626033  | 8.410773834 | 0.568297609  | 0.583146506 | 0.583146506 | -5.478630278 |
| 1458827_at   | 0.050070135  | 3.37714543  | 0.568282361  | 0.583156446 | 0.583156446 | -5.478638347 |
| 1456727_a_at | 0.039105196  | 9.678501214 | 0.568233868  | 0.583188055 | 0.583188055 | -5.478664004 |
| 1426679_at   | 0.038830942  | 10.27369052 | 0.568210438  | 0.583203328 | 0.583203328 | -5.4786764   |
| 1434882_at   | -0.054004787 | 9.056797158 | -0.568123437 | 0.583260042 | 0.583260042 | -5.478722425 |
| 1430095_at   | 0.036612823  | 4.752112606 | 0.568069266  | 0.583295356 | 0.583295356 | -5.47875108  |
| 1436189_at   | -0.047235581 | 4.667655502 | -0.568059045 | 0.58330202  | 0.58330202  | -5.478756486 |
| 1442431_at   | 0.034378286  | 3.600766685 | 0.567991978  | 0.583345743 | 0.583345743 | -5.478791958 |
| 1416324_s_at | 0.041245773  | 7.856012357 | 0.567961759  | 0.583365444 | 0.583365444 | -5.478807939 |
| 1457387_at   | -0.042417358 | 3.880608425 | -0.567913011 | 0.583397226 | 0.583397226 | -5.478833718 |
| 1436774_at   | -0.042819355 | 9.966884182 | -0.567868189 | 0.58342645  | 0.58342645  | -5.478857419 |
| 1420491_at   | 0.353749481  | 6.986380849 | 0.567852222  | 0.58343686  | 0.58343686  | -5.478865862 |
| 1443550_at   | -0.046363965 | 4.133031684 | -0.567837916 | 0.583446187 | 0.583446187 | -5.478873426 |
| 1454197_a_at | 0.07205884   | 7.35062863  | 0.567781337  | 0.583483078 | 0.583483078 | -5.47890334  |
| 1446716_at   | -0.073207811 | 4.301210898 | -0.567779028 | 0.583484583 | 0.583484583 | -5.478904561 |
| 1419368_a_at | -0.055094715 | 6.50633591  | -0.567749386 | 0.583503911 | 0.583503911 | -5.478920232 |
| 1460159_at   | 0.129583715  | 7.431366432 | 0.567735051  | 0.583513259 | 0.583513259 | -5.47892781  |
| 1434916_at   | -0.035898104 | 8.027848452 | -0.567685085 | 0.583545839 | 0.583545839 | -5.478954224 |
| 1423872_a_at | 0.05240333   | 8.868191146 | 0.567681958  | 0.583547878 | 0.583547878 | -5.478955876 |
| 1433769_at   | -0.04520815  | 5.625048037 | -0.567679481 | 0.583549494 | 0.583549494 | -5.478957186 |
| 1432559_at   | -0.055301683 | 3.89850112  | -0.567524385 | 0.583650631 | 0.583650631 | -5.479039159 |
| 1443421_s_at | 0.043212413  | 5.005552508 | 0.567479077  | 0.583680179 | 0.583680179 | -5.479063102 |
| 1458781_at   | 0.081509885  | 4.706377072 | 0.567477104  | 0.583681466 | 0.583681466 | -5.479064145 |
| 1435920_x_at | -0.048817984 | 4.325380819 | -0.5674595   | 0.583692946 | 0.583692946 | -5.479073447 |
| 1449284_at   | 0.042329727  | 4.689073839 | 0.567442482  | 0.583704045 | 0.583704045 | -5.479082439 |
| 1415775_at   | 0.039282863  | 12.44586637 | 0.567430654  | 0.583711758 | 0.583711758 | -5.479088689 |
| 1455977_x_at | 0.05803542   | 3.81985633  | 0.567411907  | 0.583723984 | 0.583723984 | -5.479098595 |
| 1429533_at   | 0.046871387  | 8.250666369 | 0.567403409  | 0.583729527 | 0.583729527 | -5.479103085 |
| 1430949_at   | -0.050579959 | 4.080621162 | -0.567396724 | 0.583733887 | 0.583733887 | -5.479106617 |
| 1436185_at   | 0.044471496  | 7.825676817 | 0.567333065  | 0.583775405 | 0.583775405 | -5.47914025  |
| 1420149_at   | -0.043998515 | 5.040875803 | -0.567330879 | 0.58377683  | 0.58377683  | -5.479141405 |
| 1435037_at   | -0.064235351 | 4.987612032 | -0.567315623 | 0.583786781 | 0.583786781 | -5.479149464 |
| 1428903_at   | 0.044939389  | 8.531672041 | 0.567303561  | 0.583794648 | 0.583794648 | -5.479155836 |
| 1425530_a_at | 0.062821103  | 4.546701874 | 0.567274175  | 0.583813814 | 0.583813814 | -5.47917136  |
| 1416733_at   | -0.037332059 | 8.583763857 | -0.567244883 | 0.583832919 | 0.583832919 | -5.479186833 |
| 1430098_at   | -0.047645167 | 3.658439436 | -0.567238475 | 0.583837098 | 0.583837098 | -5.479190218 |
| 1419928_at   | 0.040981928  | 5.046912048 | 0.56723845   | 0.583837115 | 0.583837115 | -5.479190231 |
| 1436442_at   | 0.040171034  | 5.655102977 | 0.567159707  | 0.583888476 | 0.583888476 | -5.479231822 |
| 1420740_at   | -0.0450356   | 4.004549507 | -0.567113396 | 0.583918684 | 0.583918684 | -5.47925628  |
| 1423252_at   | 0.037365685  | 8.410739392 | 0.567070305  | 0.583946792 | 0.583946792 | -5.479279037 |

|              |              |             |              |             |             |              |
|--------------|--------------|-------------|--------------|-------------|-------------|--------------|
| 1459267_at   | 0.044641631  | 6.056973111 | 0.566971452  | 0.584011277 | 0.584011277 | -5.479331234 |
| 1436940_at   | -0.042218024 | 3.967637261 | -0.566953905 | 0.584022724 | 0.584022724 | -5.479340499 |
| 1447412_at   | -0.048238538 | 5.090326244 | -0.566933748 | 0.584035874 | 0.584035874 | -5.479351141 |
| 1458940_at   | 0.050549557  | 3.573859172 | 0.566931463  | 0.584037364 | 0.584037364 | -5.479352347 |
| 1458303_at   | -0.046777663 | 7.159086238 | -0.566918101 | 0.584046081 | 0.584046081 | -5.479359402 |
| 1444512_at   | 0.082100753  | 6.126526775 | 0.566871582  | 0.584076429 | 0.584076429 | -5.47938396  |
| 1428801_at   | 0.053555221  | 6.844460649 | 0.566814859  | 0.584113436 | 0.584113436 | -5.479413903 |
| 1431298_at   | -0.046951534 | 3.269758191 | -0.566728222 | 0.58416996  | 0.58416996  | -5.479459632 |
| 1444180_at   | -0.053267652 | 6.995015165 | -0.566717538 | 0.584176931 | 0.584176931 | -5.479465271 |
| 1418716_at   | 0.044707582  | 7.03044523  | 0.566640097  | 0.584227458 | 0.584227458 | -5.479506139 |
| 1456349_x_at | 0.044012304  | 10.64596655 | 0.566639505  | 0.584227844 | 0.584227844 | -5.479506451 |
| 1434316_at   | -0.038448884 | 11.02655065 | -0.566638941 | 0.584228212 | 0.584228212 | -5.479506749 |
| 1458649_at   | -0.053187617 | 4.276558574 | -0.566618421 | 0.584241601 | 0.584241601 | -5.479517577 |
| 1445119_at   | 0.045151901  | 3.789261724 | 0.566604868  | 0.584250445 | 0.584250445 | -5.479524729 |
| 1442616_at   | -0.047775873 | 6.21361813  | -0.566588385 | 0.5842612   | 0.5842612   | -5.479533427 |
| 1449951_at   | -0.065916919 | 5.385980331 | -0.566553459 | 0.58428399  | 0.58428399  | -5.479551855 |
| 1454401_at   | -0.048850362 | 5.100042909 | -0.566547788 | 0.58428769  | 0.58428769  | -5.479554847 |
| 1435134_at   | -0.055327854 | 4.191749177 | -0.566498821 | 0.584319642 | 0.584319642 | -5.479580683 |
| 1422883_at   | -0.036692825 | 9.362688467 | -0.566489095 | 0.584325989 | 0.584325989 | -5.479585814 |
| 1441379_at   | -0.036233247 | 3.047014903 | -0.566477798 | 0.58433336  | 0.58433336  | -5.479591774 |
| 1426530_a_at | -0.040396476 | 9.248203614 | -0.566475347 | 0.58433496  | 0.58433496  | -5.479593067 |
| 1447085_s_at | -0.036958825 | 4.530335937 | -0.566439175 | 0.584358564 | 0.584358564 | -5.479612149 |
| 1452680_at   | 0.037046351  | 11.5742026  | 0.566427956  | 0.584365885 | 0.584365885 | -5.479618068 |
| 1429238_a_at | -0.043396453 | 6.918414294 | -0.566415784 | 0.584373828 | 0.584373828 | -5.479624488 |
| 1419175_a_at | -0.043511908 | 3.947396579 | -0.566358812 | 0.584411007 | 0.584411007 | -5.479654541 |
| 1418587_at   | -0.069018592 | 9.309987349 | -0.566337799 | 0.58442472  | 0.58442472  | -5.479665624 |
| 1443641_at   | -0.064749031 | 4.0285339   | -0.566328582 | 0.584430735 | 0.584430735 | -5.479670485 |
| 1447740_at   | 0.042819633  | 3.081994438 | 0.566312326  | 0.584441344 | 0.584441344 | -5.479679059 |
| 1420459_at   | 0.060468404  | 4.636169789 | 0.566298534  | 0.584450345 | 0.584450345 | -5.479686333 |
| 1422742_at   | 0.07309401   | 6.450092198 | 0.566297218  | 0.584451204 | 0.584451204 | -5.479687027 |
| 1449456_a_at | -0.131619624 | 5.84483427  | -0.566181217 | 0.584526911 | 0.584526911 | -5.479748202 |
| 1445728_at   | -0.071087431 | 5.260865235 | -0.566172716 | 0.584532459 | 0.584532459 | -5.479752684 |
| 1438828_at   | 0.073590883  | 6.460215152 | 0.566164187  | 0.584538026 | 0.584538026 | -5.479757182 |
| 1429994_s_at | 0.056808377  | 3.330269612 | 0.566159958  | 0.584540786 | 0.584540786 | -5.479759412 |
| 1426397_at   | 0.04936159   | 10.46020985 | 0.566152891  | 0.584545398 | 0.584545398 | -5.479763138 |
| 1440399_at   | -0.044785538 | 3.196420891 | -0.566144813 | 0.584550671 | 0.584550671 | -5.479767397 |
| 1426173_at   | -0.057498495 | 4.15354822  | -0.566133937 | 0.584557769 | 0.584557769 | -5.479773132 |
| 1436597_at   | 0.042985834  | 7.57111908  | 0.566131882  | 0.58455911  | 0.58455911  | -5.479774216 |
| 1446015_at   | -0.05190455  | 4.216080514 | -0.566117903 | 0.584568234 | 0.584568234 | -5.479781586 |
| 1430281_at   | 0.054183096  | 3.206800192 | 0.566066103  | 0.584602044 | 0.584602044 | -5.479808897 |
| 1440323_at   | -0.06207177  | 4.617395565 | -0.56600272  | 0.584643415 | 0.584643415 | -5.479842311 |
| 1427672_a_at | 0.073928899  | 8.848967319 | 0.565999626  | 0.584645435 | 0.584645435 | -5.479843942 |
| 1416781_at   | -0.040600788 | 9.162152208 | -0.565996922 | 0.5846472   | 0.5846472   | -5.479845367 |
| 1451811_at   | -0.055131754 | 3.600572523 | -0.565966374 | 0.58466714  | 0.58466714  | -5.479861471 |
| 1430539_at   | 0.044204282  | 5.321043581 | 0.565932914  | 0.584688981 | 0.584688981 | -5.479879108 |
| 1448610_a_at | 0.062174878  | 9.122233323 | 0.565842576  | 0.584747952 | 0.584747952 | -5.479926721 |
| 1454904_at   | -0.11065539  | 9.423456017 | -0.565826288 | 0.584758585 | 0.584758585 | -5.479935305 |
| 1457244_at   | 0.041187965  | 3.495589462 | 0.565804972  | 0.5847725   | 0.5847725   | -5.479946538 |
| 1419671_a_at | 0.047083581  | 6.40940808  | 0.565782415  | 0.584787225 | 0.584787225 | -5.479958425 |
| 1425674_a_at | -0.039873873 | 9.811056196 | -0.56576375  | 0.58479941  | 0.58479941  | -5.479968261 |
| 1427111_s_at | -0.045235024 | 6.733438019 | -0.565715408 | 0.58483097  | 0.58483097  | -5.479993734 |
| 1453271_at   | -0.045780799 | 9.992087905 | -0.565689414 | 0.58484794  | 0.58484794  | -5.48000743  |
| 1420216_at   | -0.067724045 | 3.743783506 | -0.565669827 | 0.584860728 | 0.584860728 | -5.48001775  |

|              |              |             |              |             |             |              |
|--------------|--------------|-------------|--------------|-------------|-------------|--------------|
| 1416901_at   | -0.039255376 | 11.3835298  | -0.565663044 | 0.584865156 | 0.584865156 | -5.480021323 |
| 1438386_x_at | 0.047015972  | 9.850554957 | 0.565654867  | 0.584870495 | 0.584870495 | -5.480025632 |
| 1438699_at   | -0.07858022  | 7.409131334 | -0.565597407 | 0.584908009 | 0.584908009 | -5.480055903 |
| 1423897_at   | 0.073174573  | 10.92405076 | 0.565588511  | 0.584913817 | 0.584913817 | -5.48006059  |
| 1459079_at   | -0.062920198 | 3.825582191 | -0.565575266 | 0.584922465 | 0.584922465 | -5.480067567 |
| 1426533_at   | 0.037134074  | 10.01920323 | 0.565509006  | 0.584965727 | 0.584965727 | -5.48010247  |
| 1425417_x_at | 0.043653518  | 3.233754411 | 0.565501062  | 0.584970914 | 0.584970914 | -5.480106655 |
| 1459235_at   | 0.047309756  | 3.434493158 | 0.565459874  | 0.584997807 | 0.584997807 | -5.480128348 |
| 1436960_at   | 0.051438379  | 9.3832238   | 0.565458372  | 0.584998788 | 0.584998788 | -5.480129139 |
| 1435663_at   | -0.041904419 | 3.166921137 | -0.565457154 | 0.584999583 | 0.584999583 | -5.480129781 |
| 1423552_at   | -0.042242436 | 8.070058385 | -0.565445436 | 0.585007234 | 0.585007234 | -5.480135952 |
| 1433285_at   | 0.04819764   | 4.910185215 | 0.565387516  | 0.585045054 | 0.585045054 | -5.480166456 |
| 1452252_at   | 0.043199788  | 8.617116861 | 0.565382948  | 0.585048037 | 0.585048037 | -5.480168862 |
| 1420275_at   | 0.035701753  | 5.634902611 | 0.565354491  | 0.585066619 | 0.585066619 | -5.480183848 |
| 1417043_at   | -0.056686286 | 6.424004202 | -0.565263088 | 0.585126306 | 0.585126306 | -5.480231977 |
| 1455273_at   | 0.039690759  | 8.609822183 | 0.565232687  | 0.585146159 | 0.585146159 | -5.480247983 |
| 1445029_at   | -0.056448017 | 3.599157713 | -0.565227651 | 0.585149448 | 0.585149448 | -5.480250634 |
| 1419294_at   | -0.06693417  | 3.837568946 | -0.56522741  | 0.585149605 | 0.585149605 | -5.480250761 |
| 1423475_at   | -0.044712711 | 6.069125945 | -0.565206952 | 0.585162964 | 0.585162964 | -5.480261531 |
| 1454958_at   | -0.048022549 | 9.223443434 | -0.565179812 | 0.585180689 | 0.585180689 | -5.48027582  |
| 1445225_at   | -0.062310895 | 4.67947585  | -0.565179118 | 0.585181142 | 0.585181142 | -5.480276185 |
| 1443771_x_at | 0.060405004  | 4.711147081 | 0.56509452   | 0.585236391 | 0.585236391 | -5.480320718 |
| 1430904_at   | -0.077342341 | 5.384878478 | -0.565093462 | 0.585237082 | 0.585237082 | -5.480321275 |
| 1416233_at   | 0.040942716  | 12.16629323 | 0.565092776  | 0.585237529 | 0.585237529 | -5.480321636 |
| 1419954_s_at | -0.052584101 | 9.093074488 | -0.565086309 | 0.585241753 | 0.585241753 | -5.48032504  |
| 1445607_at   | -0.049193925 | 4.359485774 | -0.56505681  | 0.585261019 | 0.585261019 | -5.480340567 |
| 1439300_at   | 0.128143262  | 6.851550303 | 0.565015873  | 0.585287755 | 0.585287755 | -5.480362113 |
| 1425085_at   | 0.035587249  | 6.502923316 | 0.565014769  | 0.585288477 | 0.585288477 | -5.480362694 |
| 1417919_at   | -0.0528146   | 8.515205531 | -0.564908404 | 0.585357948 | 0.585357948 | -5.48041867  |
| 1437893_at   | 0.081904616  | 5.924098621 | 0.564900511  | 0.585363104 | 0.585363104 | -5.480422823 |
| 1427988_s_at | -0.035370057 | 8.295086442 | -0.564891084 | 0.585369261 | 0.585369261 | -5.480427784 |
| 1446151_at   | 0.03935494   | 3.221519205 | 0.564846335  | 0.585398491 | 0.585398491 | -5.48045133  |
| 1419190_at   | 0.035880414  | 6.514618786 | 0.564788753  | 0.585436103 | 0.585436103 | -5.480481625 |
| 1417662_at   | 0.062962361  | 6.989061402 | 0.564765778  | 0.585451111 | 0.585451111 | -5.480493713 |
| 1448489_at   | 0.043825918  | 7.971390824 | 0.564758885  | 0.585455613 | 0.585455613 | -5.480497339 |
| 1429554_at   | 0.042360214  | 9.11229796  | 0.564754116  | 0.585458729 | 0.585458729 | -5.480499848 |
| 1432743_at   | 0.0580615    | 3.966216638 | 0.56466011   | 0.585520137 | 0.585520137 | -5.480549298 |
| 1445425_at   | -0.056507209 | 4.512805678 | -0.564641149 | 0.585532524 | 0.585532524 | -5.480559271 |
| 1441756_at   | 0.058900514  | 6.761637893 | 0.564586783  | 0.58556804  | 0.58556804  | -5.480587866 |
| 1424817_at   | -0.051374329 | 7.471732879 | -0.564582559 | 0.5855708   | 0.5855708   | -5.480590087 |
| 1427723_at   | -0.05723522  | 5.630265097 | -0.564532536 | 0.58560348  | 0.58560348  | -5.480616395 |
| 1424093_x_at | 0.037181457  | 8.630640156 | 0.564496748  | 0.585626861 | 0.585626861 | -5.480635215 |
| 1419530_at   | -0.041566998 | 3.611476517 | -0.564394381 | 0.585693743 | 0.585693743 | -5.480689041 |
| 1447410_at   | -0.038496697 | 3.842297406 | -0.564351702 | 0.585721628 | 0.585721628 | -5.480711479 |
| 1441929_at   | 0.037156197  | 3.496483927 | 0.564317786  | 0.585743789 | 0.585743789 | -5.48072931  |
| 1460112_at   | -0.044804454 | 4.555645663 | -0.564278995 | 0.585769135 | 0.585769135 | -5.480749701 |
| 1416973_at   | 0.036324281  | 11.04613396 | 0.56421499   | 0.585810957 | 0.585810957 | -5.480783345 |
| 1422808_s_at | -0.06213025  | 5.393620909 | -0.56420686  | 0.58581627  | 0.58581627  | -5.480787618 |
| 1440828_x_at | 0.046970512  | 3.405257141 | 0.564196571  | 0.585822993 | 0.585822993 | -5.480793026 |
| 1427451_a_at | 0.079800378  | 4.022823544 | 0.564187638  | 0.585828831 | 0.585828831 | -5.480797721 |
| 1459458_at   | -0.040828673 | 3.575416451 | -0.56410119  | 0.585885321 | 0.585885321 | -5.480843154 |
| 1459977_x_at | 0.035015499  | 3.205550821 | 0.564087259  | 0.585894425 | 0.585894425 | -5.480850475 |
| 1420993_at   | -0.050516637 | 4.582464944 | -0.564082664 | 0.585897428 | 0.585897428 | -5.48085289  |



|              |              |             |              |             |             |              |
|--------------|--------------|-------------|--------------|-------------|-------------|--------------|
| 1448579_at   | -0.047961006 | 10.79573078 | -0.564080477 | 0.585898857 | 0.585898857 | -5.480854039 |
| 1444315_at   | -0.063476879 | 5.364348106 | -0.564056917 | 0.585914254 | 0.585914254 | -5.48086642  |
| 1448086_at   | -0.053074218 | 3.695674693 | -0.564045674 | 0.585921601 | 0.585921601 | -5.480872328 |
| 1457365_at   | 0.045500439  | 3.789168853 | 0.564037903  | 0.585926679 | 0.585926679 | -5.480876411 |
| 1448874_a_at | -0.065927176 | 9.471098621 | -0.564002298 | 0.585949948 | 0.585949948 | -5.480895119 |
| 1437719_x_at | 0.077545122  | 8.126530326 | 0.56396695   | 0.585973049 | 0.585973049 | -5.480913692 |
| 1443737_at   | -0.057187776 | 6.016834747 | -0.563861084 | 0.586042238 | 0.586042238 | -5.480969309 |
| 1421469_a_at | -0.045891315 | 6.412143987 | -0.563841466 | 0.58605506  | 0.58605506  | -5.480979614 |
| 1449049_at   | -0.171550938 | 4.992813511 | -0.563815747 | 0.58607187  | 0.58607187  | -5.480993124 |
| 1433742_at   | -0.056650747 | 7.24405935  | -0.563813725 | 0.586073192 | 0.586073192 | -5.480994186 |
| 1417798_at   | 0.068562082  | 6.44573528  | 0.563806439  | 0.586077953 | 0.586077953 | -5.480998013 |
| 1432481_a_at | 0.03335555   | 3.512713862 | 0.563757449  | 0.586109974 | 0.586109974 | -5.481023745 |
| 1437449_at   | 0.135197886  | 6.875465781 | 0.563714743  | 0.586137888 | 0.586137888 | -5.481046174 |
| 1439349_at   | 0.04512593   | 6.145895812 | 0.563690957  | 0.586153435 | 0.586153435 | -5.481058665 |
| 1431510_s_at | 0.077770934  | 8.124266361 | 0.563685861  | 0.586156767 | 0.586156767 | -5.481061342 |
| 1440308_at   | -0.0567445   | 4.743672723 | -0.563674987 | 0.586163874 | 0.586163874 | -5.481067052 |
| 1418677_at   | 0.107289672  | 6.470260346 | 0.563647697  | 0.586181712 | 0.586181712 | -5.481081383 |
| 1427916_at   | -0.039857119 | 8.757612051 | -0.563635092 | 0.586189952 | 0.586189952 | -5.481088003 |
| 1431943_at   | -0.046842275 | 4.801541425 | -0.56360314  | 0.586210838 | 0.586210838 | -5.48110478  |
| 1439085_at   | 0.047132365  | 4.789741175 | 0.563592547  | 0.586217762 | 0.586217762 | -5.481110342 |
| 1452043_at   | 0.040269603  | 7.946870483 | 0.563573594  | 0.586230152 | 0.586230152 | -5.481120294 |
| 1447072_at   | -0.069825262 | 3.89489368  | -0.56356501  | 0.586235763 | 0.586235763 | -5.481124801 |
| 1417974_at   | 0.035703659  | 9.847851673 | 0.563520446  | 0.586264895 | 0.586264895 | -5.481148199 |
| 1447823_x_at | -0.053202684 | 4.354553589 | -0.563501474 | 0.586277297 | 0.586277297 | -5.481158159 |
| 1422214_at   | -0.039648488 | 4.168515044 | -0.5634853   | 0.586287871 | 0.586287871 | -5.481166651 |
| 1458946_at   | 0.045282783  | 3.941802931 | 0.563456519  | 0.586306686 | 0.586306686 | -5.48118176  |
| 1432260_at   | -0.048621806 | 4.377581917 | -0.563408572 | 0.586338031 | 0.586338031 | -5.481206929 |
| 1417473_a_at | 0.080068501  | 4.4944534   | 0.563403131  | 0.586341588 | 0.586341588 | -5.481209785 |
| 1443934_at   | -0.084092694 | 6.927256385 | -0.563350523 | 0.586375982 | 0.586375982 | -5.481237399 |
| 1456926_at   | 0.055371236  | 4.402091454 | 0.563325344  | 0.586392443 | 0.586392443 | -5.481250614 |
| 1426004_a_at | 0.05224571   | 7.215575151 | 0.563254716  | 0.58643862  | 0.58643862  | -5.48128768  |
| 1439558_at   | 0.090004997  | 4.722561658 | 0.563223185  | 0.586459236 | 0.586459236 | -5.481304227 |
| 1421270_at   | 0.066641306  | 5.028369679 | 0.563173961  | 0.58649142  | 0.58649142  | -5.481330057 |
| 1437755_at   | -0.043478109 | 3.590941856 | -0.563086646 | 0.586548513 | 0.586548513 | -5.481375869 |
| 1436612_at   | 0.054896425  | 4.111333758 | 0.563051673  | 0.586571381 | 0.586571381 | -5.481394217 |
| 1429030_at   | -0.060772932 | 6.166681299 | -0.562990434 | 0.586611426 | 0.586611426 | -5.481426342 |
| 1434524_at   | -0.035316419 | 8.362103713 | -0.562985918 | 0.58661438  | 0.58661438  | -5.481428711 |
| 1446961_at   | -0.04052946  | 4.432275797 | -0.56295556  | 0.586634231 | 0.586634231 | -5.481444635 |
| 1448037_at   | 0.037241411  | 5.846720428 | 0.562934283  | 0.586648145 | 0.586648145 | -5.481455795 |
| 1433509_s_at | 0.102656694  | 8.318388809 | 0.562883406  | 0.586681416 | 0.586681416 | -5.481482479 |
| 1429915_at   | 0.050911654  | 3.467140176 | 0.562872989  | 0.586688229 | 0.586688229 | -5.481487942 |
| 1442510_at   | -0.043229835 | 4.18791447  | -0.562852617 | 0.586701552 | 0.586701552 | -5.481498626 |
| 1419503_at   | 0.04678869   | 5.317850633 | 0.562816594  | 0.58672511  | 0.58672511  | -5.481517517 |
| 1416632_at   | -0.073714583 | 8.155401557 | -0.562759663 | 0.586762343 | 0.586762343 | -5.481547371 |
| 1455024_at   | 0.042340137  | 9.794043207 | 0.562687189  | 0.586809743 | 0.586809743 | -5.481585371 |
| 1424535_at   | -0.045035415 | 7.795115862 | -0.562599756 | 0.58686693  | 0.58686693  | -5.481631209 |
| 1419374_at   | 0.035832779  | 8.660375654 | 0.56253069   | 0.586912104 | 0.586912104 | -5.481667412 |
| 1437125_at   | -0.064866407 | 5.73629518  | -0.56252005  | 0.586919064 | 0.586919064 | -5.48167299  |
| 1444743_at   | 0.063982926  | 4.810729644 | 0.56251809   | 0.586920346 | 0.586920346 | -5.481674017 |
| 1441870_s_at | 0.052807248  | 10.43976241 | 0.562500487  | 0.58693186  | 0.58693186  | -5.481683243 |
| 1425571_at   | 0.045331834  | 3.706692569 | 0.562495375  | 0.586935205 | 0.586935205 | -5.481685923 |
| 1445246_at   | -0.051840789 | 4.263130575 | -0.562493098 | 0.586936694 | 0.586936694 | -5.481687116 |
| 1453613_at   | 0.042289312  | 5.266437795 | 0.562473868  | 0.586949272 | 0.586949272 | -5.481697195 |

|              |              |             |              |             |             |              |
|--------------|--------------|-------------|--------------|-------------|-------------|--------------|
| 1419122_at   | -0.046823278 | 7.876639504 | -0.562456994 | 0.58696031  | 0.58696031  | -5.481706038 |
| 1458547_at   | -0.056244196 | 3.951046749 | -0.562453938 | 0.586962309 | 0.586962309 | -5.48170764  |
| 1454533_at   | 0.042802848  | 3.604416861 | 0.56243207   | 0.586976614 | 0.586976614 | -5.481719101 |
| 1449610_at   | -0.041502968 | 3.498144973 | -0.562422427 | 0.586982922 | 0.586982922 | -5.481724155 |
| 1455890_x_at | 0.036788218  | 5.69833213  | 0.562304991  | 0.587059745 | 0.587059745 | -5.481785693 |
| 1427028_at   | -0.039166774 | 5.981439731 | -0.562277004 | 0.587078054 | 0.587078054 | -5.481800357 |
| 1433651_at   | -0.038935429 | 9.149988341 | -0.562211311 | 0.587121031 | 0.587121031 | -5.481834774 |
| 1439447_x_at | -0.034773168 | 7.569383759 | -0.562162244 | 0.587153133 | 0.587153133 | -5.481860479 |
| 1451972_at   | -0.056151242 | 8.122667487 | -0.562141211 | 0.587166894 | 0.587166894 | -5.481871496 |
| 1417246_at   | -0.04507728  | 3.852127439 | -0.56208546  | 0.58720337  | 0.58720337  | -5.481900699 |
| 1452847_at   | -0.036910285 | 7.042834047 | -0.562064319 | 0.587217202 | 0.587217202 | -5.481911772 |
| 1415993_at   | 0.037421036  | 10.1181231  | 0.562051662  | 0.587225484 | 0.587225484 | -5.481918401 |
| 1430388_a_at | -0.048311255 | 11.43112352 | -0.562021854 | 0.587244987 | 0.587244987 | -5.481934012 |
| 1454861_at   | -0.038524918 | 9.06969254  | -0.561977041 | 0.587274308 | 0.587274308 | -5.481957481 |
| 1434662_at   | 0.052455595  | 7.790374721 | 0.561965456  | 0.587281889 | 0.587281889 | -5.481963548 |
| 1436097_x_at | -0.036496897 | 5.433147178 | -0.561949393 | 0.587292399 | 0.587292399 | -5.481971959 |
| 1445646_at   | 0.049857636  | 7.738893394 | 0.5619251    | 0.587308295 | 0.587308295 | -5.481984681 |
| 1436625_at   | -0.05484419  | 5.746351531 | -0.561898937 | 0.587325415 | 0.587325415 | -5.48199838  |
| 1446131_at   | -0.064580186 | 5.431203916 | -0.561898044 | 0.587325999 | 0.587325999 | -5.481998848 |
| 1430320_at   | 0.054760055  | 3.831908277 | 0.561882737  | 0.587336015 | 0.587336015 | -5.482006862 |
| 1426407_at   | 0.041876154  | 11.17556782 | 0.561852754  | 0.587355635 | 0.587355635 | -5.482022561 |
| 1450606_at   | -0.037567451 | 5.081617429 | -0.561827405 | 0.587372223 | 0.587372223 | -5.482035833 |
| 1437350_at   | -0.039037049 | 7.762788654 | -0.561769653 | 0.587410016 | 0.587410016 | -5.482066068 |
| 1421089_a_at | 0.0376682    | 7.321134898 | 0.561759383  | 0.587416736 | 0.587416736 | -5.482071444 |
| 1446988_at   | 0.043643034  | 4.646668193 | 0.561740219  | 0.587429277 | 0.587429277 | -5.482081476 |
| 1446207_at   | -0.04160934  | 4.923318219 | -0.561675623 | 0.58747155  | 0.58747155  | -5.482115289 |
| 1457445_at   | -0.0550232   | 8.837832826 | -0.56164999  | 0.587488326 | 0.587488326 | -5.482128706 |
| 1442855_at   | -0.047385476 | 5.803969772 | -0.561645409 | 0.587491324 | 0.587491324 | -5.482131104 |
| 1434664_at   | 0.057391105  | 8.664754886 | 0.56161757   | 0.587509543 | 0.587509543 | -5.482145674 |
| 1450558_at   | -0.048264473 | 3.155852663 | -0.561569344 | 0.587541106 | 0.587541106 | -5.482170913 |
| 1423414_at   | 0.061674333  | 6.353437287 | 0.561476759  | 0.587601703 | 0.587601703 | -5.482219362 |
| 1432772_at   | -0.05083603  | 4.040564927 | -0.56130269  | 0.58771564  | 0.58771564  | -5.482310431 |
| 1459180_at   | -0.036960523 | 3.224859697 | -0.561300871 | 0.587716831 | 0.587716831 | -5.482311382 |
| 1423313_at   | 0.035261198  | 7.588571822 | 0.561291925  | 0.587722687 | 0.587722687 | -5.482316061 |
| 1422782_s_at | 0.042750064  | 5.002248916 | 0.561291479  | 0.587722979 | 0.587722979 | -5.482316295 |
| 1416850_s_at | -0.034844385 | 10.20486725 | -0.561258362 | 0.587744657 | 0.587744657 | -5.482333618 |
| 1439413_x_at | -0.039049843 | 12.64101058 | -0.561205343 | 0.587779364 | 0.587779364 | -5.482361348 |
| 1446967_at   | -0.042410361 | 9.193676746 | -0.561074366 | 0.587865108 | 0.587865108 | -5.482429844 |
| 1429018_at   | -0.037786547 | 6.097339101 | -0.561033423 | 0.587891913 | 0.587891913 | -5.482451252 |
| 1459283_at   | 0.054931465  | 7.480284222 | 0.561028653  | 0.587895036 | 0.587895036 | -5.482453747 |
| 1431692_a_at | 0.04379765   | 6.358066481 | 0.560980403  | 0.587926626 | 0.587926626 | -5.482478974 |
| 1460424_at   | -0.042426421 | 8.660040203 | -0.56094644  | 0.587948862 | 0.587948862 | -5.48249673  |
| 1416777_at   | -0.054196603 | 3.43528854  | -0.560878821 | 0.587993134 | 0.587993134 | -5.482532078 |
| 1459993_at   | -0.082081014 | 5.437547334 | -0.560875244 | 0.587995476 | 0.587995476 | -5.482533948 |
| 1417642_at   | 0.045747392  | 5.446668759 | 0.560817009  | 0.588033607 | 0.588033607 | -5.482564388 |
| 1456633_at   | 0.078944657  | 4.735893754 | 0.560718881  | 0.58809786  | 0.58809786  | -5.482615673 |
| 1434011_a_at | 0.051308884  | 10.75886708 | 0.5607132    | 0.588101581 | 0.588101581 | -5.482618642 |
| 1450949_at   | -0.037039322 | 8.281666332 | -0.560710633 | 0.588103262 | 0.588103262 | -5.482619984 |
| 1425975_a_at | -0.055784907 | 8.062220066 | -0.560687201 | 0.588118606 | 0.588118606 | -5.482632229 |
| 1438124_at   | 0.061717365  | 3.418498699 | 0.560676474  | 0.58812563  | 0.58812563  | -5.482637835 |
| 1436678_at   | 0.067775198  | 6.181725254 | 0.560561089  | 0.58820119  | 0.58820119  | -5.482698124 |
| 1446577_at   | 0.044391276  | 3.187284471 | 0.560456727  | 0.588269537 | 0.588269537 | -5.482752644 |
| 1437782_at   | -0.038504224 | 3.839979044 | -0.560453949 | 0.588271356 | 0.588271356 | -5.482754096 |

|              |              |             |              |             |             |              |
|--------------|--------------|-------------|--------------|-------------|-------------|--------------|
| 1441393_at   | -0.039106875 | 4.402178571 | -0.560388392 | 0.588314292 | 0.588314292 | -5.482788339 |
| 1430902_at   | 0.044467642  | 4.223198771 | 0.560381     | 0.588319133 | 0.588319133 | -5.4827922   |
| 1441063_at   | -0.0718866   | 6.950359101 | -0.560337579 | 0.588347572 | 0.588347572 | -5.482814877 |
| 1459786_at   | 0.045499561  | 3.16992824  | 0.56032002   | 0.588359073 | 0.588359073 | -5.482824048 |
| 1439025_at   | -0.060154999 | 6.475939318 | -0.560247459 | 0.588406599 | 0.588406599 | -5.482861941 |
| 1455746_at   | 0.037527598  | 8.531510849 | 0.560209173  | 0.588431677 | 0.588431677 | -5.482881933 |
| 1428631_a_at | -0.035830372 | 10.92855917 | -0.560204026 | 0.588435048 | 0.588435048 | -5.48288462  |
| 1432321_at   | 0.039626529  | 3.427531936 | 0.560203856  | 0.58843516  | 0.58843516  | -5.482884709 |
| 1425544_at   | 0.044980807  | 7.172747225 | 0.560163356  | 0.588461688 | 0.588461688 | -5.482905855 |
| 1427616_at   | -0.062267363 | 4.006711302 | -0.560162607 | 0.588462179 | 0.588462179 | -5.482906246 |
| 1438627_x_at | -0.048292859 | 9.002227478 | -0.560129973 | 0.588483555 | 0.588483555 | -5.482923285 |
| 1447266_at   | -0.065061639 | 3.912475269 | -0.560094077 | 0.588507069 | 0.588507069 | -5.482942025 |
| 1455249_at   | 0.047035804  | 8.802948426 | 0.560092798  | 0.588507907 | 0.588507907 | -5.482942693 |
| 1455253_at   | -0.05583881  | 6.501095275 | -0.560085811 | 0.588512484 | 0.588512484 | -5.48294634  |
| 1416027_at   | -0.034888544 | 10.44610252 | -0.560071011 | 0.588522179 | 0.588522179 | -5.482954066 |
| 1455514_at   | 0.065006369  | 6.559424133 | 0.559978355  | 0.588582877 | 0.588582877 | -5.483002432 |
| 1438730_at   | -0.060028887 | 7.87319708  | -0.559942972 | 0.588606057 | 0.588606057 | -5.4830209   |
| 1444231_at   | -0.062527505 | 6.521777142 | -0.559940257 | 0.588607835 | 0.588607835 | -5.483022317 |
| 1446849_at   | -0.089854788 | 6.411157431 | -0.559906557 | 0.588629913 | 0.588629913 | -5.483039906 |
| 1456390_at   | 0.050229153  | 9.330227786 | 0.559893974  | 0.588638157 | 0.588638157 | -5.483046472 |
| 1442184_at   | -0.055946732 | 4.059800551 | -0.559890691 | 0.588640308 | 0.588640308 | -5.483048186 |
| 1419559_at   | -0.074372836 | 3.700524475 | -0.559805323 | 0.588696237 | 0.588696237 | -5.483092734 |
| 1444103_at   | -0.051784097 | 3.659497274 | -0.559778869 | 0.588713569 | 0.588713569 | -5.483106538 |
| 1416699_at   | 0.035971878  | 10.66583478 | 0.559743112  | 0.588736997 | 0.588736997 | -5.483125195 |
| 1421779_at   | 0.038641153  | 3.376406403 | 0.55971773   | 0.588753628 | 0.588753628 | -5.483138438 |
| 1421893_a_at | 0.041209639  | 7.938302461 | 0.559416785  | 0.588950827 | 0.588950827 | -5.483295411 |
| 1444654_at   | 0.055273746  | 7.07716378  | 0.559415133  | 0.58895191  | 0.58895191  | -5.483296273 |
| 1438338_at   | -0.046353409 | 6.037785665 | -0.559389022 | 0.588969021 | 0.588969021 | -5.483309888 |
| 1448607_at   | 0.046368746  | 4.682707637 | 0.559340184  | 0.589001027 | 0.589001027 | -5.483335353 |
| 1460543_x_at | 0.034347585  | 13.2219277  | 0.559275578  | 0.589043368 | 0.589043368 | -5.483369037 |
| 1458619_at   | -0.041617726 | 4.24304075  | -0.55920196  | 0.589091617 | 0.589091617 | -5.483407416 |
| 1442569_at   | 0.111295788  | 7.141409139 | 0.559151151  | 0.589124918 | 0.589124918 | -5.4834339   |
| 1433713_at   | -0.062273782 | 7.897873001 | -0.559126027 | 0.589141385 | 0.589141385 | -5.483446996 |
| 1449791_x_at | 0.065730895  | 4.844243361 | 0.559087232  | 0.589166814 | 0.589166814 | -5.483467216 |
| 1454298_at   | 0.044915968  | 4.234900473 | 0.559065814  | 0.589180852 | 0.589180852 | -5.483478378 |
| 1433105_at   | 0.071186519  | 4.467381791 | 0.55904062   | 0.589197367 | 0.589197367 | -5.483491509 |
| 1444335_at   | 0.044335325  | 3.732301226 | 0.559033361  | 0.589202125 | 0.589202125 | -5.483495292 |
| 1423737_at   | -0.035230913 | 10.80163114 | -0.559003586 | 0.589221641 | 0.589221641 | -5.483510808 |
| 1426541_a_at | 0.110137546  | 6.492337164 | 0.558963974  | 0.589247607 | 0.589247607 | -5.48353145  |
| 1459838_s_at | 0.063532552  | 7.56688772  | 0.558947967  | 0.589258099 | 0.589258099 | -5.48353979  |
| 1425122_at   | 0.043118934  | 3.565130101 | 0.558937215  | 0.589265147 | 0.589265147 | -5.483545393 |
| 1454462_at   | -0.045073755 | 3.223208095 | -0.558920743 | 0.589275945 | 0.589275945 | -5.483553976 |
| 1434348_at   | 0.038553495  | 7.953138928 | 0.55891945   | 0.589276793 | 0.589276793 | -5.483554649 |
| 1453138_at   | 0.074567887  | 4.770733979 | 0.5588367    | 0.589331039 | 0.589331039 | -5.483597763 |
| 1450296_at   | -0.036672109 | 3.415734042 | -0.558692856 | 0.589425341 | 0.589425341 | -5.483672692 |
| 1449882_a_at | -0.046095343 | 4.006939382 | -0.55861408  | 0.589476988 | 0.589476988 | -5.483713719 |
| 1427705_a_at | 0.037521686  | 9.444869946 | 0.5585956    | 0.589489104 | 0.589489104 | -5.483723343 |
| 1433953_at   | 0.039877727  | 8.758018152 | 0.558595358  | 0.589489264 | 0.589489264 | -5.483723469 |
| 1425300_at   | -0.062549299 | 5.382567211 | -0.558565771 | 0.589508662 | 0.589508662 | -5.483738876 |
| 1458124_at   | -0.062213172 | 4.380087938 | -0.558547998 | 0.589520315 | 0.589520315 | -5.483748131 |
| 1453242_x_at | 0.048844398  | 4.44130182  | 0.558543425  | 0.589523314 | 0.589523314 | -5.483750513 |
| 1427067_at   | -0.058078916 | 7.303245195 | -0.558489049 | 0.589558967 | 0.589558967 | -5.483778826 |
| 1434390_at   | -0.037070815 | 8.881664261 | -0.55844784  | 0.589585988 | 0.589585988 | -5.483800281 |

|                    |              |             |              |             |             |              |
|--------------------|--------------|-------------|--------------|-------------|-------------|--------------|
| 1446571_at         | 0.057151031  | 7.722409103 | 0.558433436  | 0.589595433 | 0.589595433 | -5.483807781 |
| 1445070_at         | -0.050668058 | 5.927477441 | -0.558417193 | 0.589606083 | 0.589606083 | -5.483816237 |
| 1455281_at         | 0.069729536  | 5.285894431 | 0.558415679  | 0.589607076 | 0.589607076 | -5.483817025 |
| 1443488_at         | -0.087468685 | 3.347427517 | -0.55840313  | 0.589615305 | 0.589615305 | -5.483823558 |
| 1456299_at         | -0.045310189 | 3.586682241 | -0.558342318 | 0.589655182 | 0.589655182 | -5.483855215 |
| 1439201_at         | -0.035555163 | 8.435854473 | -0.558340938 | 0.589656086 | 0.589656086 | -5.483855933 |
| 1428210_s_at       | 0.069903848  | 7.712066844 | 0.558338863  | 0.589657447 | 0.589657447 | -5.483857013 |
| 1417083_at         | -0.036904293 | 11.93313209 | -0.55826817  | 0.589703805 | 0.589703805 | -5.48389381  |
| 1425171_at         | -0.057609442 | 4.333294305 | -0.558265467 | 0.589705578 | 0.589705578 | -5.483895217 |
| 1416125_at         | -0.044489521 | 8.843657884 | -0.558235574 | 0.589725181 | 0.589725181 | -5.483910774 |
| 1424070_at         | -0.054765718 | 7.057206591 | -0.558223908 | 0.589732831 | 0.589732831 | -5.483916846 |
| 1426666_a_at       | -0.036051737 | 9.763427964 | -0.558209134 | 0.58974252  | 0.58974252  | -5.483924535 |
| 1455491_at         | 0.034765902  | 10.06114855 | 0.558198333  | 0.589749604 | 0.589749604 | -5.483930156 |
| 1435770_at         | 0.063473973  | 6.192729127 | 0.55812669   | 0.589796589 | 0.589796589 | -5.483967438 |
| 1445341_at         | -0.153455072 | 5.671789843 | -0.558117881 | 0.589802366 | 0.589802366 | -5.483972022 |
| 1442463_at         | 0.061502752  | 6.258088865 | 0.558112293  | 0.589806031 | 0.589806031 | -5.48397493  |
| 1453120_at         | -0.042996123 | 9.818963625 | -0.558105546 | 0.589810455 | 0.589810455 | -5.48397844  |
| 1430973_at         | 0.041115658  | 4.344520912 | 0.558088893  | 0.589821377 | 0.589821377 | -5.483987105 |
| 1453894_at         | -0.065274371 | 3.898264584 | -0.558077001 | 0.589829177 | 0.589829177 | -5.483993293 |
| 1434276_x_at       | 0.044145402  | 5.909830338 | 0.558072627  | 0.589832045 | 0.589832045 | -5.483995569 |
| 1450040_at         | -0.057377755 | 9.931797787 | -0.557957769 | 0.589907378 | 0.589907378 | -5.484055324 |
| 1438335_at         | -0.08344743  | 5.907458343 | -0.55795171  | 0.589911352 | 0.589911352 | -5.484058476 |
| 1435149_at         | -0.044878685 | 9.445756514 | -0.55794465  | 0.589915983 | 0.589915983 | -5.484062149 |
| 1435554_at         | 0.055760689  | 7.353165322 | 0.557917659  | 0.589933687 | 0.589933687 | -5.484076189 |
| 1431067_at         | 0.06471998   | 5.894441273 | 0.557893973  | 0.589949223 | 0.589949223 | -5.48408851  |
| 1430389_at         | -0.042133178 | 4.105094868 | -0.55784388  | 0.58998208  | 0.58998208  | -5.484114565 |
| 1450938_at         | 0.052068045  | 9.426763859 | 0.557816691  | 0.589999915 | 0.589999915 | -5.484128706 |
| 1427064_a_at       | -0.050884288 | 8.416261763 | -0.557797434 | 0.590012547 | 0.590012547 | -5.484138721 |
| AFFX-r2-P1-cre-5_a | 0.039380516  | 13.53902242 | 0.557795944  | 0.590013524 | 0.590013524 | -5.484139496 |
| 1435978_at         | -0.048584189 | 4.540241558 | -0.557790639 | 0.590017004 | 0.590017004 | -5.484142255 |
| 1458598_at         | 0.048168735  | 5.524580248 | 0.557689003  | 0.590083676 | 0.590083676 | -5.484195108 |
| 1450172_at         | -0.041100785 | 7.663427482 | -0.557685493 | 0.590085979 | 0.590085979 | -5.484196933 |
| 1434158_at         | -0.04374024  | 8.695440626 | -0.557578199 | 0.590156366 | 0.590156366 | -5.484252718 |
| 1423148_at         | 0.051118431  | 11.64517762 | 0.557516494  | 0.590196848 | 0.590196848 | -5.484284795 |
| 1446242_at         | 0.047788283  | 3.99039052  | 0.557472592  | 0.590225652 | 0.590225652 | -5.484307616 |
| 1428777_at         | 0.063388401  | 5.995372277 | 0.557423122  | 0.590258109 | 0.590258109 | -5.484333329 |
| 1435576_at         | 0.044391303  | 6.606347885 | 0.557394163  | 0.590277109 | 0.590277109 | -5.48434838  |
| 1458878_at         | -0.064773283 | 4.036067682 | -0.557350475 | 0.590305775 | 0.590305775 | -5.484371085 |
| 1437035_x_at       | 0.087292366  | 6.686840972 | 0.557312817  | 0.590330483 | 0.590330483 | -5.484390654 |
| 1417982_at         | -0.056245853 | 8.790212488 | -0.557297865 | 0.590340294 | 0.590340294 | -5.484398424 |
| 1444653_at         | 0.038644527  | 4.66036007  | 0.557291896  | 0.590344211 | 0.590344211 | -5.484401526 |
| 1427967_at         | 0.107018116  | 5.452234302 | 0.557288627  | 0.590346356 | 0.590346356 | -5.484403225 |
| 1448563_at         | 0.036922311  | 8.634659406 | 0.557278175  | 0.590353214 | 0.590353214 | -5.484408656 |
| 1428488_at         | -0.041656808 | 7.940232065 | -0.557275078 | 0.590355246 | 0.590355246 | -5.484410265 |
| 1457729_at         | -0.069648862 | 3.730332859 | -0.5572265   | 0.590387122 | 0.590387122 | -5.484435506 |
| 1421521_at         | -0.044409318 | 3.444416172 | -0.55715539  | 0.590433784 | 0.590433784 | -5.484472451 |
| 1420732_at         | -0.038837883 | 3.946071819 | -0.557136839 | 0.590445958 | 0.590445958 | -5.484482088 |
| 1440788_at         | -0.058410196 | 5.3568794   | -0.557083423 | 0.590481011 | 0.590481011 | -5.484509837 |
| 1415790_at         | -0.036454651 | 8.291043765 | -0.557076743 | 0.590485395 | 0.590485395 | -5.484513306 |
| 1442094_at         | 0.039982691  | 7.387473432 | 0.557071354  | 0.590488932 | 0.590488932 | -5.484516106 |
| 1426790_at         | 0.039851788  | 10.66219024 | 0.557068464  | 0.590490828 | 0.590490828 | -5.484517607 |
| 1446964_at         | -0.049574187 | 3.660306188 | -0.556905561 | 0.590597738 | 0.590597738 | -5.484602214 |
| 1415729_at         | -0.046581896 | 8.874294605 | -0.556876822 | 0.5906166   | 0.5906166   | -5.484617137 |

|              |              |             |              |             |             |              |
|--------------|--------------|-------------|--------------|-------------|-------------|--------------|
| 1433190_at   | 0.048046758  | 5.334422685 | 0.556865568  | 0.590623986 | 0.590623986 | -5.484622981 |
| 1433032_at   | 0.044718437  | 4.000639535 | 0.556838469  | 0.590641772 | 0.590641772 | -5.484637053 |
| 1448445_at   | -0.048699334 | 7.808312741 | -0.556808427 | 0.59066149  | 0.59066149  | -5.484652651 |
| 1445469_at   | 0.049576137  | 3.524372998 | 0.556779005  | 0.590680802 | 0.590680802 | -5.484667927 |
| 1447581_at   | 0.076754867  | 5.22568176  | 0.556769922  | 0.590686763 | 0.590686763 | -5.484672643 |
| 1417582_s_at | -0.040832561 | 7.709562678 | -0.556723713 | 0.590717093 | 0.590717093 | -5.484696633 |
| 1441771_at   | 0.045859363  | 8.551842218 | 0.556717259  | 0.59072133  | 0.59072133  | -5.484699983 |
| 1431711_a_at | 0.074418813  | 5.831746769 | 0.556710256  | 0.590725927 | 0.590725927 | -5.484703619 |
| 1452877_at   | 0.036608776  | 10.55650823 | 0.556657137  | 0.590760794 | 0.590760794 | -5.484731193 |
| 1455634_at   | -0.036506727 | 8.461682702 | -0.556563848 | 0.590822031 | 0.590822031 | -5.484779615 |
| 1419942_at   | -0.057226498 | 6.190639034 | -0.556562383 | 0.590822993 | 0.590822993 | -5.484780375 |
| 1421158_at   | 0.044958699  | 5.970146041 | 0.556536646  | 0.590839888 | 0.590839888 | -5.484793732 |
| 1454543_at   | -0.040504354 | 5.16350305  | -0.556469022 | 0.590884281 | 0.590884281 | -5.484828826 |
| 1456317_at   | 0.040565499  | 5.766732798 | 0.556466872  | 0.590885693 | 0.590885693 | -5.484829941 |
| 1429978_at   | 0.05048677   | 5.725077401 | 0.556464533  | 0.590887228 | 0.590887228 | -5.484831155 |
| 1453021_at   | 0.034025471  | 5.923249806 | 0.55643974   | 0.590903504 | 0.590903504 | -5.48484402  |
| 1458026_at   | -0.073138706 | 6.460871689 | -0.556365587 | 0.590952187 | 0.590952187 | -5.484882496 |
| 1439640_at   | -0.042040032 | 8.480421469 | -0.556314259 | 0.590985885 | 0.590985885 | -5.484909125 |
| 1438324_at   | -0.039586467 | 3.403760926 | -0.556260341 | 0.591021285 | 0.591021285 | -5.484937096 |
| 1435111_at   | 0.043719353  | 3.304486253 | 0.556239584  | 0.591034914 | 0.591034914 | -5.484947863 |
| 1420900_a_at | 0.037412588  | 11.00450862 | 0.556228392  | 0.591042262 | 0.591042262 | -5.484953669 |
| 1421338_at   | -0.064068235 | 5.732289499 | -0.556222869 | 0.591045888 | 0.591045888 | -5.484956533 |
| 1448420_a_at | 0.037163411  | 7.565962618 | 0.556184396  | 0.591071149 | 0.591071149 | -5.484976489 |
| 1453340_at   | -0.043557318 | 3.380777094 | -0.556184056 | 0.591071373 | 0.591071373 | -5.484976665 |
| 1439545_at   | -0.050664561 | 7.634511128 | -0.556178154 | 0.591075247 | 0.591075247 | -5.484979726 |
| 1437953_at   | -0.054561428 | 4.206968745 | -0.556141079 | 0.591099591 | 0.591099591 | -5.484998956 |
| 1455440_at   | 0.056438156  | 8.081138958 | 0.556029409  | 0.591172917 | 0.591172917 | -5.485056866 |
| 1460199_a_at | -0.058091501 | 9.792723662 | -0.556009508 | 0.591185985 | 0.591185985 | -5.485067185 |
| 1459789_at   | 0.041360593  | 3.144177624 | 0.555940411  | 0.59123136  | 0.59123136  | -5.485103012 |
| 1448695_at   | -0.036695171 | 7.858349029 | -0.555935584 | 0.59123453  | 0.59123453  | -5.485105515 |
| 1444726_at   | 0.055610498  | 5.460777587 | 0.555867518  | 0.591279229 | 0.591279229 | -5.485140802 |
| 1438345_at   | 0.036011698  | 7.602689738 | 0.555853553  | 0.5912884   | 0.5912884   | -5.485148042 |
| 1438590_at   | -0.068052245 | 4.386921109 | -0.555832803 | 0.591302027 | 0.591302027 | -5.485158798 |
| 1427179_at   | -0.057016904 | 5.979032125 | -0.555808824 | 0.591317775 | 0.591317775 | -5.485171228 |
| 1460549_a_at | 0.035851011  | 8.875406021 | 0.555789582  | 0.591330412 | 0.591330412 | -5.485181202 |
| 1441444_at   | 0.06591142   | 7.268478812 | 0.555749282  | 0.591356879 | 0.591356879 | -5.48520209  |
| 1444171_at   | 0.040067498  | 6.279349553 | 0.55574351   | 0.59136067  | 0.59136067  | -5.485205081 |
| 1443247_at   | -0.081940358 | 4.537636489 | -0.55572932  | 0.59136999  | 0.59136999  | -5.485212436 |
| 1439065_x_at | -0.060511045 | 3.567321375 | -0.555697807 | 0.591390687 | 0.591390687 | -5.485228768 |
| 1443630_at   | 0.060675253  | 6.098500541 | 0.555690329  | 0.591395598 | 0.591395598 | -5.485232643 |
| 1434122_at   | -0.039318975 | 6.549613167 | -0.555656447 | 0.591417852 | 0.591417852 | -5.485250202 |
| 1432812_at   | -0.044260795 | 3.64346045  | -0.555650936 | 0.591421471 | 0.591421471 | -5.485253058 |
| 1438351_at   | 0.065756494  | 3.767368426 | 0.555633643  | 0.591432829 | 0.591432829 | -5.485262019 |
| 1431838_at   | -0.039260397 | 6.225385889 | -0.555626098 | 0.591437785 | 0.591437785 | -5.485265929 |
| 1449759_at   | 0.046342555  | 4.60630207  | 0.5556038    | 0.591452431 | 0.591452431 | -5.485277484 |
| 1427770_a_at | 0.052675839  | 4.17939765  | 0.555573812  | 0.591472128 | 0.591472128 | -5.485293022 |
| 1434476_at   | -0.060699365 | 7.88110308  | -0.555552486 | 0.591486135 | 0.591486135 | -5.485304072 |
| 1449853_at   | 0.047201305  | 8.234677115 | 0.555524542  | 0.59150449  | 0.59150449  | -5.48531855  |
| 1429310_at   | 0.056141019  | 9.235671476 | 0.555520753  | 0.591506979 | 0.591506979 | -5.485320513 |
| 1435549_at   | -0.034078302 | 8.035421932 | -0.555466381 | 0.591542694 | 0.591542694 | -5.485348682 |
| 1448751_at   | -0.055977292 | 5.428962629 | -0.555456262 | 0.591549341 | 0.591549341 | -5.485353924 |
| 1427466_at   | -0.038365252 | 4.442748085 | -0.555344018 | 0.591623074 | 0.591623074 | -5.485412066 |
| 1428015_at   | 0.041025072  | 6.129762502 | 0.555319562  | 0.59163914  | 0.59163914  | -5.485424733 |

|              |              |             |              |             |             |              |
|--------------|--------------|-------------|--------------|-------------|-------------|--------------|
| 1444875_at   | 0.081326144  | 4.245537458 | 0.555237477  | 0.591693066 | 0.591693066 | -5.485467244 |
| 1426946_at   | -0.036927388 | 10.39712835 | -0.555213389 | 0.591708891 | 0.591708891 | -5.485479718 |
| 1424316_at   | 0.066750417  | 6.360290009 | 0.55520677   | 0.59171324  | 0.59171324  | -5.485483145 |
| 1418036_at   | 0.04190491   | 8.243610844 | 0.555203631  | 0.591715302 | 0.591715302 | -5.485484771 |
| 1432323_at   | 0.038793483  | 4.174780804 | 0.555190276  | 0.591724076 | 0.591724076 | -5.485491686 |
| 1451632_a_at | 0.052102156  | 3.663377694 | 0.55517942   | 0.591731208 | 0.591731208 | -5.485497307 |
| 1426577_a_at | -0.037977481 | 7.192063313 | -0.555166095 | 0.591739962 | 0.591739962 | -5.485504207 |
| 1426746_at   | 0.03564851   | 9.404294135 | 0.555107602  | 0.591778392 | 0.591778392 | -5.485534493 |
| 1430072_at   | -0.052108335 | 4.077441025 | -0.555028427 | 0.591830413 | 0.591830413 | -5.485575483 |
| 1423270_at   | -0.046566199 | 3.984209703 | -0.554983796 | 0.591859738 | 0.591859738 | -5.485598586 |
| 1436536_at   | 0.061504662  | 4.344142448 | 0.554981646  | 0.591861151 | 0.591861151 | -5.485599699 |
| 1449575_a_at | -0.105497774 | 11.80726879 | -0.554976318 | 0.591864652 | 0.591864652 | -5.485602457 |
| 1438466_at   | -0.141727714 | 4.954639291 | -0.554941193 | 0.591887731 | 0.591887731 | -5.485620638 |
| 1447748_x_at | -0.056146027 | 5.234478678 | -0.554935707 | 0.591891336 | 0.591891336 | -5.485623478 |
| 1436506_a_at | 0.07899825   | 9.957039819 | 0.554929987  | 0.591895094 | 0.591895094 | -5.485626438 |
| 1416719_a_at | 0.034957849  | 13.3061551  | 0.554914754  | 0.591905103 | 0.591905103 | -5.485634322 |
| 1441902_x_at | -0.03531521  | 7.4722224   | -0.554886905 | 0.591923403 | 0.591923403 | -5.485648736 |
| 1450437_a_at | -0.062187943 | 7.655559163 | -0.554871417 | 0.591933581 | 0.591933581 | -5.485656752 |
| 1433955_at   | 0.045813397  | 9.243660656 | 0.554845406  | 0.591950672 | 0.591950672 | -5.485670213 |
| 1442543_at   | -0.072771266 | 6.424166526 | -0.554817034 | 0.591969317 | 0.591969317 | -5.485684896 |
| 1420418_at   | -0.049147625 | 4.12505222  | -0.554806886 | 0.591975985 | 0.591975985 | -5.485690147 |
| 1453791_at   | 0.053563341  | 3.261205558 | 0.554715057  | 0.592036331 | 0.592036331 | -5.485737664 |
| 1444372_at   | 0.069080581  | 7.239698237 | 0.554709464  | 0.592040006 | 0.592040006 | -5.485740557 |
| 1425455_a_at | 0.039030771  | 9.477370338 | 0.554592886  | 0.59211662  | 0.59211662  | -5.485800868 |
| 1457316_at   | 0.088150753  | 5.480806516 | 0.554579516  | 0.592125408 | 0.592125408 | -5.485807785 |
| 1451366_at   | 0.050573835  | 10.62733822 | 0.554509438  | 0.592171465 | 0.592171465 | -5.485844033 |
| 1438867_at   | 0.082087767  | 4.636439412 | 0.554502303  | 0.592176155 | 0.592176155 | -5.485847724 |
| 1442979_at   | -0.055766019 | 5.142051037 | -0.554478275 | 0.592191947 | 0.592191947 | -5.485860151 |
| 1416261_at   | 0.042132127  | 7.991794122 | 0.55436918   | 0.592263653 | 0.592263653 | -5.48591657  |
| 1442293_at   | -0.041517625 | 5.137881301 | -0.554347    | 0.592278232 | 0.592278232 | -5.485928039 |
| 1453726_s_at | -0.048755224 | 9.460745001 | -0.554321898 | 0.592294733 | 0.592294733 | -5.485941018 |
| 1437924_at   | -0.037786906 | 8.236848656 | -0.55430625  | 0.592305018 | 0.592305018 | -5.485949109 |
| 1445353_at   | 0.066528324  | 4.048852516 | 0.554003167  | 0.592504261 | 0.592504261 | -5.486105778 |
| 1453016_at   | 0.04101355   | 8.81757405  | 0.554000818  | 0.592505805 | 0.592505805 | -5.486106992 |
| 1435473_at   | 0.042455941  | 8.461129706 | 0.55395395   | 0.592536619 | 0.592536619 | -5.486131211 |
| 1419016_at   | -0.04529446  | 3.336677557 | -0.55395128  | 0.592538374 | 0.592538374 | -5.486132591 |
| 1425150_at   | -0.042905448 | 4.143561346 | -0.553830248 | 0.592617952 | 0.592617952 | -5.486195127 |
| 1434580_at   | 0.087141003  | 6.79255136  | 0.55381425   | 0.59262847  | 0.59262847  | -5.486203392 |
| 1426670_at   | 0.044222408  | 10.84196651 | 0.553769511  | 0.592657888 | 0.592657888 | -5.486226504 |
| 1416628_at   | 0.046346444  | 9.733723921 | 0.553758347  | 0.592665229 | 0.592665229 | -5.486232272 |
| 1418636_at   | 0.083116773  | 5.243881953 | 0.553677967  | 0.592718083 | 0.592718083 | -5.486273791 |
| 1421026_at   | 0.08062433   | 6.800856843 | 0.553664822  | 0.592726727 | 0.592726727 | -5.48628058  |
| 1426452_a_at | -0.060282606 | 6.822296914 | -0.553655001 | 0.592733185 | 0.592733185 | -5.486285653 |
| 1442183_at   | 0.118803884  | 4.318252133 | 0.553651442  | 0.592735525 | 0.592735525 | -5.486287491 |
| 1440104_at   | 0.067542516  | 6.287736967 | 0.553635864  | 0.592745769 | 0.592745769 | -5.486295537 |
| 1422406_at   | -0.050134037 | 4.649761068 | -0.55356988  | 0.59278916  | 0.59278916  | -5.486329613 |
| 1437328_x_at | 0.035825958  | 3.09971639  | 0.553550546  | 0.592801875 | 0.592801875 | -5.486339597 |
| 1426507_at   | 0.041766635  | 5.607203891 | 0.553546846  | 0.592804308 | 0.592804308 | -5.486341508 |
| 1426094_at   | -0.05360251  | 6.121214814 | -0.553543788 | 0.592806319 | 0.592806319 | -5.486343087 |
| 1426468_at   | 0.041322601  | 8.270387428 | 0.553507767  | 0.592830008 | 0.592830008 | -5.486361688 |
| 1456751_x_at | 0.035679795  | 3.02471128  | 0.55340955   | 0.592894601 | 0.592894601 | -5.486412398 |
| 1431717_at   | -0.062834377 | 4.415981447 | -0.553384267 | 0.59291123  | 0.59291123  | -5.486425451 |
| 1444081_at   | 0.057491467  | 4.396690015 | 0.553321368  | 0.592952598 | 0.592952598 | -5.486457921 |

|              |              |             |              |             |             |              |
|--------------|--------------|-------------|--------------|-------------|-------------|--------------|
| 1452318_a_at | 0.053223448  | 8.128898124 | 0.553270543  | 0.592986027 | 0.592986027 | -5.486484155 |
| 1454655_at   | -0.063632252 | 7.140240127 | -0.553193104 | 0.593036962 | 0.593036962 | -5.486524123 |
| 1437967_at   | 0.067550076  | 4.548630605 | 0.553139766  | 0.593072046 | 0.593072046 | -5.486551649 |
| 1443310_at   | -0.04546181  | 3.23087876  | -0.553072772 | 0.593116115 | 0.593116115 | -5.486586218 |
| 1431003_a_at | 0.060598453  | 8.010588733 | 0.553058342  | 0.593125607 | 0.593125607 | -5.486593664 |
| 1452523_a_at | 0.056016909  | 5.116484723 | 0.553040055  | 0.593137636 | 0.593137636 | -5.486603099 |
| 1439342_at   | 0.038623019  | 8.074426919 | 0.553026434  | 0.593146596 | 0.593146596 | -5.486610127 |
| 1431818_at   | -0.062512558 | 8.709840298 | -0.553010763 | 0.593156906 | 0.593156906 | -5.486618212 |
| 1460180_at   | -0.045580396 | 8.063888764 | -0.552983426 | 0.593174889 | 0.593174889 | -5.486632315 |
| 1433157_at   | -0.035532684 | 4.671046243 | -0.552959487 | 0.593190637 | 0.593190637 | -5.486644665 |
| 1452184_at   | -0.035727975 | 10.99959283 | -0.552949088 | 0.593197478 | 0.593197478 | -5.48665003  |
| 1432448_at   | 0.050646348  | 5.311280043 | 0.552947262  | 0.593198679 | 0.593198679 | -5.486650972 |
| 1440480_at   | -0.045059769 | 6.286361962 | -0.552909044 | 0.593223821 | 0.593223821 | -5.486670687 |
| 1429638_at   | 0.055808474  | 4.452510988 | 0.552901917  | 0.59322851  | 0.59322851  | -5.486674363 |
| 1445633_at   | 0.040704619  | 4.048244484 | 0.552897426  | 0.593231465 | 0.593231465 | -5.48667668  |
| 1433890_a_at | -0.070395003 | 8.942843266 | -0.552897187 | 0.593231622 | 0.593231622 | -5.486676803 |
| 1425402_at   | 0.058288407  | 5.436486158 | 0.552895157  | 0.593232958 | 0.593232958 | -5.48667785  |
| 1452158_at   | 0.083234031  | 9.347354122 | 0.552894074  | 0.59323367  | 0.59323367  | -5.486678409 |
| 1426026_at   | -0.070855321 | 5.533729344 | -0.552791235 | 0.593301328 | 0.593301328 | -5.486731451 |
| 1422502_at   | -0.042931425 | 10.33106647 | -0.552775873 | 0.593311435 | 0.593311435 | -5.486739374 |
| 1428002_at   | -0.054731843 | 4.075432142 | -0.552745828 | 0.593331202 | 0.593331202 | -5.486754868 |
| 1421189_at   | -0.05045653  | 4.847826133 | -0.552686728 | 0.593370087 | 0.593370087 | -5.486785344 |
| 1448810_at   | 0.046929536  | 7.306898028 | 0.552681937  | 0.593373239 | 0.593373239 | -5.486787815 |
| 1419826_at   | 0.044765969  | 4.049203681 | 0.552663268  | 0.593385522 | 0.593385522 | -5.486797441 |
| 1423439_at   | 0.047092506  | 3.235762313 | 0.552630085  | 0.593407356 | 0.593407356 | -5.486814551 |
| 1450175_a_at | 0.034878233  | 3.163413123 | 0.552621125  | 0.593413252 | 0.593413252 | -5.48681917  |
| 1452683_at   | 0.044065746  | 11.46836873 | 0.552600793  | 0.59342663  | 0.59342663  | -5.486829654 |
| 1438521_at   | 0.037761775  | 3.605240719 | 0.552568067  | 0.593448164 | 0.593448164 | -5.486846526 |
| 1444010_at   | 0.049890552  | 3.963271578 | 0.552496283  | 0.593495399 | 0.593495399 | -5.486883531 |
| 1428233_at   | 0.042983308  | 9.200742659 | 0.552490281  | 0.593499349 | 0.593499349 | -5.486886625 |
| 1424566_s_at | -0.043484481 | 7.438581863 | -0.552473986 | 0.593510071 | 0.593510071 | -5.486895024 |
| 1457428_at   | -0.045089041 | 4.318450794 | -0.552408483 | 0.593553176 | 0.593553176 | -5.486928787 |
| 1427107_at   | 0.04821125   | 5.373174112 | 0.552337256  | 0.593600049 | 0.593600049 | -5.486965495 |
| 1435897_at   | 0.03430698   | 12.44497677 | 0.552254472  | 0.59365453  | 0.59365453  | -5.487008154 |
| 1444174_at   | 0.06704818   | 4.184281022 | 0.552223461  | 0.593674939 | 0.593674939 | -5.487024133 |
| 1442041_at   | 0.062982138  | 8.437110528 | 0.552208495  | 0.593684789 | 0.593684789 | -5.487031844 |
| 1443910_at   | 0.047545302  | 3.8884436   | 0.552190346  | 0.593696734 | 0.593696734 | -5.487041195 |
| 1431206_at   | 0.050168648  | 8.074509015 | 0.552129208  | 0.593736973 | 0.593736973 | -5.487072693 |
| 1426769_s_at | -0.045641438 | 9.424916677 | -0.552072572 | 0.593774251 | 0.593774251 | -5.487101868 |
| 1455268_at   | 0.043093875  | 7.31693273  | 0.552005936  | 0.593818111 | 0.593818111 | -5.487136191 |
| 1437704_at   | 0.053195392  | 6.46299521  | 0.551989124  | 0.593829177 | 0.593829177 | -5.48714485  |
| 1448270_at   | -0.067010647 | 8.807666535 | -0.551954712 | 0.593851828 | 0.593851828 | -5.487162573 |
| 1422578_at   | 0.041971786  | 10.63087543 | 0.551950893  | 0.593854342 | 0.593854342 | -5.48716454  |
| 1421773_at   | -0.056266728 | 5.449124834 | -0.551870175 | 0.593907476 | 0.593907476 | -5.487206107 |
| 1436483_at   | -0.043172807 | 3.481635698 | -0.551864911 | 0.593910941 | 0.593910941 | -5.487208818 |
| 1453182_a_at | -0.040302511 | 8.141173718 | -0.551811108 | 0.593946359 | 0.593946359 | -5.487236522 |
| 1431827_a_at | 0.055354139  | 9.13977139  | 0.551773634  | 0.593971028 | 0.593971028 | -5.487255816 |
| 1443194_at   | -0.044461863 | 6.880137315 | -0.551769564 | 0.593973708 | 0.593973708 | -5.487257912 |
| 1453083_at   | -0.076422339 | 6.000445842 | -0.551743492 | 0.593990872 | 0.593990872 | -5.487271335 |
| 1450563_at   | -0.046216919 | 4.285543538 | -0.551739945 | 0.593993206 | 0.593993206 | -5.48727316  |
| 1433495_at   | -0.046562283 | 10.48440958 | -0.551642027 | 0.59405767  | 0.59405767  | -5.487323567 |
| 1451764_at   | -0.06389641  | 4.660536438 | -0.551629065 | 0.594066204 | 0.594066204 | -5.487330239 |
| 1425165_at   | 0.036504149  | 3.37441914  | 0.551601979  | 0.594084037 | 0.594084037 | -5.48734418  |

|              |              |             |              |             |             |              |
|--------------|--------------|-------------|--------------|-------------|-------------|--------------|
| 1429515_at   | 0.051940719  | 8.518997608 | 0.551587818  | 0.594093361 | 0.594093361 | -5.487351469 |
| 1417470_at   | 0.045896177  | 7.295924216 | 0.551577263  | 0.59410031  | 0.59410031  | -5.487356902 |
| 1447035_at   | 0.043444209  | 4.13884525  | 0.55151546   | 0.594141001 | 0.594141001 | -5.487388709 |
| 1445525_at   | 0.044206982  | 3.297522392 | 0.551512146  | 0.594143183 | 0.594143183 | -5.487390415 |
| 1421807_at   | 0.048737692  | 3.745374702 | 0.551479795  | 0.594164483 | 0.594164483 | -5.487407062 |
| 1454054_at   | -0.050584042 | 3.669361698 | -0.55145695  | 0.594179526 | 0.594179526 | -5.487418818 |
| 1452412_at   | 0.045090252  | 3.342387192 | 0.551439812  | 0.59419081  | 0.59419081  | -5.487427637 |
| 1426924_at   | 0.046277434  | 10.07615698 | 0.551429853  | 0.594197367 | 0.594197367 | -5.487432762 |
| 1454068_at   | 0.044185515  | 3.81951127  | 0.551361811  | 0.594242171 | 0.594242171 | -5.487467771 |
| 1418476_at   | 0.07300663   | 9.706469932 | 0.551344212  | 0.594253759 | 0.594253759 | -5.487476826 |
| 1429841_at   | 0.08415933   | 7.089859211 | 0.551309629  | 0.594276532 | 0.594276532 | -5.487494617 |
| 1443278_at   | 0.07861273   | 3.618954855 | 0.551255672  | 0.594312063 | 0.594312063 | -5.487522374 |
| 1458252_at   | -0.049728959 | 3.935730531 | -0.551251723 | 0.594314663 | 0.594314663 | -5.487524406 |
| 1445042_at   | 0.056691831  | 3.338715132 | 0.551246628  | 0.594318019 | 0.594318019 | -5.487527027 |
| 1445373_at   | 0.059747375  | 4.151216465 | 0.551236961  | 0.594324384 | 0.594324384 | -5.487531999 |
| 1447451_at   | 0.049322961  | 3.542242165 | 0.551180914  | 0.594361293 | 0.594361293 | -5.487560828 |
| 1427438_at   | -0.0416335   | 3.267981773 | -0.551175916 | 0.594364585 | 0.594364585 | -5.487563399 |
| 1455461_at   | 0.06512916   | 5.056648522 | 0.551098518  | 0.594415556 | 0.594415556 | -5.487603205 |
| 1447053_x_at | -0.040843344 | 11.64229715 | -0.551032478 | 0.594459049 | 0.594459049 | -5.487637165 |
| 1424387_at   | -0.057078682 | 3.462232305 | -0.551018173 | 0.594468471 | 0.594468471 | -5.487644521 |
| 1442460_at   | 0.048494618  | 3.551985602 | 0.550965844  | 0.594502936 | 0.594502936 | -5.487671427 |
| 1440869_x_at | -0.040138456 | 4.487509969 | -0.550958114 | 0.594508027 | 0.594508027 | -5.487675401 |
| 1439760_x_at | -0.084912298 | 7.702396399 | -0.550926442 | 0.594528887 | 0.594528887 | -5.487691685 |
| 1448198_a_at | 0.04029975   | 10.91169834 | 0.550904831  | 0.594543121 | 0.594543121 | -5.487702795 |
| 1417500_a_at | -0.055588932 | 8.647639257 | -0.550815397 | 0.594602029 | 0.594602029 | -5.48774877  |
| 1441041_at   | 0.040548753  | 6.622495817 | 0.550785222  | 0.594621905 | 0.594621905 | -5.48776428  |
| 1418813_at   | -0.040551723 | 3.295999329 | -0.55071393  | 0.594668866 | 0.594668866 | -5.487800922 |
| 1448531_at   | 0.044953372  | 8.035230797 | 0.550687209  | 0.594686468 | 0.594686468 | -5.487814655 |
| 1452678_a_at | 0.038678549  | 4.637898016 | 0.550566387  | 0.594766061 | 0.594766061 | -5.48787674  |
| 1452746_at   | -0.039329867 | 9.44670625  | -0.550554712 | 0.594773752 | 0.594773752 | -5.487882739 |
| 1453265_at   | -0.037310959 | 3.161359621 | -0.550506323 | 0.594805631 | 0.594805631 | -5.4879076   |
| 1456420_at   | 0.048915656  | 5.665529849 | 0.550481648  | 0.594821887 | 0.594821887 | -5.487920277 |
| 1422405_at   | 0.040093333  | 4.270070819 | 0.55046703   | 0.594831518 | 0.594831518 | -5.487927786 |
| 1438450_at   | 0.051745889  | 4.872565728 | 0.550430356  | 0.59485568  | 0.59485568  | -5.487946626 |
| 1454202_a_at | 0.036522955  | 3.207032955 | 0.550381848  | 0.594887639 | 0.594887639 | -5.487971543 |
| 1418384_at   | 0.037919055  | 8.249729119 | 0.550353646  | 0.59490622  | 0.59490622  | -5.487986028 |
| 1444328_at   | 0.056206478  | 7.690930389 | 0.550316889  | 0.594930439 | 0.594930439 | -5.488004907 |
| 1450017_at   | 0.05308301   | 8.177058794 | 0.550259231  | 0.594968429 | 0.594968429 | -5.488034518 |
| 1444933_at   | -0.038755095 | 3.497222941 | -0.550250064 | 0.594974469 | 0.594974469 | -5.488039225 |
| 1429385_at   | -0.047456216 | 6.887071    | -0.550206273 | 0.595003324 | 0.595003324 | -5.488061713 |
| 1427792_at   | 0.036090849  | 3.557050062 | 0.550099982  | 0.595073364 | 0.595073364 | -5.488116288 |
| 1430867_at   | -0.035969242 | 3.19899024  | -0.55005664  | 0.595101925 | 0.595101925 | -5.488138539 |
| 1436055_at   | 0.040821695  | 5.816107713 | 0.550051579  | 0.59510526  | 0.59510526  | -5.488141137 |
| 1458562_at   | 0.125186141  | 6.017721558 | 0.550004399  | 0.595136352 | 0.595136352 | -5.488165356 |
| 1432875_at   | 0.053119264  | 3.343925244 | 0.549991785  | 0.595144664 | 0.595144664 | -5.488171831 |
| 1449398_at   | -0.04255232  | 3.688951884 | -0.549990833 | 0.595145291 | 0.595145291 | -5.48817232  |
| 1418833_at   | -0.047887015 | 4.756482509 | -0.549954852 | 0.595169004 | 0.595169004 | -5.488190789 |
| 1433248_at   | -0.035488244 | 3.8247789   | -0.549886098 | 0.595214315 | 0.595214315 | -5.488226077 |
| 1434260_at   | 0.036220454  | 8.986237409 | 0.549884017  | 0.595215687 | 0.595215687 | -5.488227145 |
| 1417281_a_at | -0.099460247 | 6.227751407 | -0.549863907 | 0.59522894  | 0.59522894  | -5.488237465 |
| 1416090_at   | 0.045552448  | 10.78433035 | 0.54972171   | 0.59532266  | 0.59532266  | -5.488310432 |
| 1421737_at   | -0.044775528 | 5.190520762 | -0.549656642 | 0.595365548 | 0.595365548 | -5.488343814 |
| 1453926_at   | -0.041354264 | 5.722549729 | -0.549546894 | 0.595437889 | 0.595437889 | -5.488400112 |



|              |              |             |              |             |             |              |
|--------------|--------------|-------------|--------------|-------------|-------------|--------------|
| 1447572_at   | -0.043292224 | 3.400571851 | -0.549543972 | 0.595439815 | 0.595439815 | -5.48840161  |
| 1455285_at   | -0.067819283 | 8.368866217 | -0.549472998 | 0.595486601 | 0.595486601 | -5.488438012 |
| 1441753_at   | -0.056387603 | 6.882899142 | -0.549462807 | 0.595493319 | 0.595493319 | -5.488443239 |
| 1418530_at   | 0.039072067  | 9.404841804 | 0.549373812  | 0.595551988 | 0.595551988 | -5.488488877 |
| 1460326_at   | 0.042746001  | 9.130804532 | 0.549341141  | 0.595573526 | 0.595573526 | -5.488505629 |
| 1454711_at   | -0.039975827 | 10.06581332 | -0.54929307  | 0.595605218 | 0.595605218 | -5.488530276 |
| 1451618_at   | -0.056312176 | 5.939351546 | -0.549278366 | 0.595614912 | 0.595614912 | -5.488537815 |
| 1421375_a_at | -0.08723002  | 9.302505687 | -0.549198497 | 0.59566757  | 0.59566757  | -5.48857876  |
| 1447772_at   | -0.073302765 | 5.896155918 | -0.549197294 | 0.595668363 | 0.595668363 | -5.488579377 |
| 1424499_s_at | 0.050554608  | 6.056313532 | 0.549195738  | 0.595669389 | 0.595669389 | -5.488580174 |
| 1434343_at   | 0.041861941  | 6.374087349 | 0.54915755   | 0.595694567 | 0.595694567 | -5.488599749 |
| 1447764_at   | 0.047870849  | 3.508532255 | 0.549123888  | 0.595716762 | 0.595716762 | -5.488617004 |
| 1447236_at   | -0.061396147 | 4.153453394 | -0.549121903 | 0.59571807  | 0.59571807  | -5.488618021 |
| 1417726_at   | -0.03749059  | 9.046357183 | -0.549095146 | 0.595735713 | 0.595735713 | -5.488631735 |
| 1435202_at   | -0.066480011 | 7.538226975 | -0.549078042 | 0.59574699  | 0.59574699  | -5.488640501 |
| 1440050_at   | 0.035764094  | 6.329345043 | 0.549065376  | 0.595755342 | 0.595755342 | -5.488646993 |
| 1449043_at   | -0.056116732 | 8.081651657 | -0.549046028 | 0.5957681   | 0.5957681   | -5.488656909 |
| 1415945_at   | -0.046605513 | 9.504235727 | -0.54903601  | 0.595774705 | 0.595774705 | -5.488662043 |
| 1435005_at   | 0.056417531  | 8.883587297 | 0.548987429  | 0.595806739 | 0.595806739 | -5.488686938 |
| 1458988_at   | -0.044323955 | 4.953711918 | -0.548977215 | 0.595813474 | 0.595813474 | -5.488692172 |
| 1453361_at   | -0.064285996 | 6.444837482 | -0.548916426 | 0.595853559 | 0.595853559 | -5.48872332  |
| 1424090_at   | -0.043886174 | 4.946956021 | -0.54889804  | 0.595865683 | 0.595865683 | -5.488732741 |
| 1440814_x_at | -0.038527948 | 7.357914164 | -0.54889045  | 0.595870688 | 0.595870688 | -5.48873663  |
| 1452241_at   | 0.039124661  | 10.17910191 | 0.548840054  | 0.595903922 | 0.595903922 | -5.488762449 |
| 1437134_at   | -0.087550827 | 5.234994463 | -0.548809067 | 0.595924357 | 0.595924357 | -5.488778324 |
| 1424479_at   | 0.04461744   | 3.519900155 | 0.548803328  | 0.595928142 | 0.595928142 | -5.488781264 |
| 1424924_at   | -0.040567941 | 8.279705387 | -0.548748535 | 0.595964276 | 0.595964276 | -5.488809332 |
| 1436174_at   | -0.037152834 | 9.736136061 | -0.548737967 | 0.595971246 | 0.595971246 | -5.488814745 |
| 1428753_a_at | -0.038680246 | 8.141633978 | -0.548735096 | 0.595973139 | 0.595973139 | -5.488816215 |
| 1429465_at   | 0.037022181  | 3.304206454 | 0.548634535  | 0.59603946  | 0.59603946  | -5.48886772  |
| 1419525_at   | -0.045882525 | 4.835274371 | -0.548632586 | 0.596040746 | 0.596040746 | -5.488868718 |
| 1439246_x_at | -0.035211684 | 6.930994676 | -0.548630968 | 0.596041813 | 0.596041813 | -5.488869547 |
| 1433375_at   | -0.049928175 | 3.990203235 | -0.548613463 | 0.596053359 | 0.596053359 | -5.488878512 |
| 1432444_a_at | -0.043916494 | 8.521916913 | -0.548607829 | 0.596057075 | 0.596057075 | -5.488881397 |
| 1419819_s_at | -0.035281501 | 8.491076437 | -0.548607151 | 0.596057522 | 0.596057522 | -5.488881744 |
| 1417646_a_at | 0.069776625  | 9.766192916 | 0.548547199  | 0.596097063 | 0.596097063 | -5.488912444 |
| 1446381_at   | 0.049724853  | 3.32520692  | 0.548532085  | 0.596107032 | 0.596107032 | -5.488920183 |
| 1456693_at   | 0.041683953  | 3.545512612 | 0.548516286  | 0.596117453 | 0.596117453 | -5.488928273 |
| 1443832_s_at | -0.05901668  | 7.334158057 | -0.548499919 | 0.596128248 | 0.596128248 | -5.488936653 |
| 1455826_a_at | 0.049829368  | 9.752206004 | 0.548480215  | 0.596141245 | 0.596141245 | -5.488946742 |
| 1437907_a_at | 0.058634683  | 10.55788111 | 0.548477789  | 0.596142845 | 0.596142845 | -5.488947984 |
| 1422350_at   | -0.056928846 | 3.908033614 | -0.54845557  | 0.596157501 | 0.596157501 | -5.48895936  |
| 1457565_at   | -0.038890902 | 6.407000498 | -0.548452911 | 0.596159254 | 0.596159254 | -5.488960721 |
| 1458518_at   | 0.07994259   | 5.23601991  | 0.548402606  | 0.596192436 | 0.596192436 | -5.488986475 |
| 1437050_s_at | 0.040972558  | 8.720173521 | 0.548341826  | 0.596232529 | 0.596232529 | -5.489017588 |
| 1459207_at   | -0.056699228 | 3.275286061 | -0.548295542 | 0.59626306  | 0.59626306  | -5.489041279 |
| 1457107_at   | 0.051392105  | 6.816779387 | 0.548242198  | 0.596298251 | 0.596298251 | -5.489068581 |
| 1439991_a_at | -0.040622248 | 4.940864014 | -0.548136329 | 0.596368094 | 0.596368094 | -5.489122759 |
| 1422054_a_at | -0.038806662 | 4.600230674 | -0.548127631 | 0.596373832 | 0.596373832 | -5.48912721  |
| 1446551_at   | -0.043230016 | 3.540103918 | -0.548051154 | 0.596424287 | 0.596424287 | -5.48916634  |
| 1419991_at   | 0.040072756  | 3.13901625  | 0.548028576  | 0.596439183 | 0.596439183 | -5.489177891 |
| 1453161_at   | -0.039900884 | 5.50931009  | -0.548002254 | 0.596456549 | 0.596456549 | -5.489191357 |
| 1435011_x_at | 0.040457446  | 11.89613567 | 0.547925936  | 0.596506904 | 0.596506904 | -5.489230398 |

|              |              |             |              |             |             |              |
|--------------|--------------|-------------|--------------|-------------|-------------|--------------|
| 1444318_at   | 0.042008012  | 8.296557737 | 0.547882653  | 0.596535463 | 0.596535463 | -5.489252537 |
| 1423864_at   | 0.038977101  | 9.054458612 | 0.547781321  | 0.596602326 | 0.596602326 | -5.489304361 |
| 1455868_a_at | 0.041811327  | 9.180738416 | 0.547761195  | 0.596615607 | 0.596615607 | -5.489314653 |
| 1424266_s_at | 0.046390943  | 3.545625383 | 0.547695292  | 0.596659095 | 0.596659095 | -5.489348352 |
| 1419643_s_at | 0.038036961  | 4.032968958 | 0.547613577  | 0.59671302  | 0.59671302  | -5.489390131 |
| 1457900_at   | 0.066097923  | 5.468828952 | 0.547611999  | 0.596714062 | 0.596714062 | -5.489390938 |
| 1447344_at   | 0.04319133   | 4.517011393 | 0.547587525  | 0.596730213 | 0.596730213 | -5.48940345  |
| 1422773_at   | -0.049784374 | 4.28375133  | -0.547586123 | 0.596731138 | 0.596731138 | -5.489404167 |
| 1416230_at   | -0.039333851 | 9.154686554 | -0.547551604 | 0.596753919 | 0.596753919 | -5.489421813 |
| 1418996_a_at | 0.055642544  | 8.785278869 | 0.547496938  | 0.596789997 | 0.596789997 | -5.489449757 |
| 1442377_at   | 0.046874333  | 3.570815599 | 0.547495389  | 0.596791019 | 0.596791019 | -5.489450548 |
| 1435023_at   | 0.044919583  | 7.629792391 | 0.547494389  | 0.596791679 | 0.596791679 | -5.489451059 |
| 1441298_at   | -0.045663055 | 3.507275193 | -0.547447813 | 0.596822419 | 0.596822419 | -5.489474866 |
| 1441277_s_at | 0.064437163  | 5.028922678 | 0.547412021  | 0.596846041 | 0.596846041 | -5.489493158 |
| 1421143_at   | 0.042702431  | 7.549697048 | 0.547360157  | 0.596880272 | 0.596880272 | -5.489519663 |
| 1458780_at   | -0.036089944 | 3.731332348 | -0.547290145 | 0.596926483 | 0.596926483 | -5.489555439 |
| 1450488_at   | 0.052805566  | 6.187960121 | 0.547285969  | 0.59692924  | 0.59692924  | -5.489557573 |
| 1429689_at   | -0.045029451 | 7.077051059 | -0.547235615 | 0.596962477 | 0.596962477 | -5.4895833   |
| 1418198_a_at | -0.044758322 | 9.307809033 | -0.547142581 | 0.597023888 | 0.597023888 | -5.489630829 |
| 1430988_at   | -0.053836749 | 3.328841148 | -0.547130121 | 0.597032113 | 0.597032113 | -5.489637194 |
| 1416947_s_at | -0.041037419 | 8.91548793  | -0.547119237 | 0.597039298 | 0.597039298 | -5.489642754 |
| 1433407_at   | -0.086670453 | 4.34845979  | -0.547097587 | 0.597053589 | 0.597053589 | -5.489653813 |
| 1444001_at   | -0.05125848  | 7.64380954  | -0.546995337 | 0.59712109  | 0.59712109  | -5.489706037 |
| 1436101_at   | -0.039827967 | 7.968136779 | -0.546991858 | 0.597123387 | 0.597123387 | -5.489707814 |
| 1423602_at   | 0.04308697   | 4.287659676 | 0.546984584  | 0.597128189 | 0.597128189 | -5.489711529 |
| 1457773_at   | 0.051831127  | 4.044839627 | 0.546974905  | 0.597134579 | 0.597134579 | -5.489716472 |
| 1448203_at   | -0.042475461 | 11.03294389 | -0.546948733 | 0.597151857 | 0.597151857 | -5.489729837 |
| 1450943_at   | -0.042075657 | 7.732347861 | -0.546911703 | 0.597176304 | 0.597176304 | -5.489748747 |
| 1446181_at   | 0.062496017  | 3.629340264 | 0.546870138  | 0.597203746 | 0.597203746 | -5.48976997  |
| 1449230_at   | 0.040401196  | 6.258980634 | 0.546867587  | 0.59720543  | 0.59720543  | -5.489771273 |
| 1416463_at   | -0.044411285 | 7.96153232  | -0.546864587 | 0.597207411 | 0.597207411 | -5.489772805 |
| 1419353_at   | 0.047401467  | 5.670363862 | 0.546830076  | 0.597230196 | 0.597230196 | -5.489790425 |
| 1455232_at   | 0.055501288  | 3.210749002 | 0.546684115  | 0.597326568 | 0.597326568 | -5.489864938 |
| 1436083_at   | -0.045387586 | 5.900705805 | -0.546623562 | 0.597366552 | 0.597366552 | -5.489895845 |
| 1434019_at   | 0.034850302  | 10.50907393 | 0.546609452  | 0.597375868 | 0.597375868 | -5.489903047 |
| 1431859_at   | 0.047858908  | 3.705776127 | 0.546572886  | 0.597400014 | 0.597400014 | -5.489921708 |
| 1424736_at   | -0.04811392  | 12.8299594  | -0.546560673 | 0.597408079 | 0.597408079 | -5.489927941 |
| 1434921_at   | 0.037387112  | 3.504356471 | 0.546420046  | 0.597500944 | 0.597500944 | -5.489999699 |
| 1441989_at   | 0.049668967  | 7.339465162 | 0.546419884  | 0.597501051 | 0.597501051 | -5.489999781 |
| 1422356_at   | -0.044522713 | 3.262923339 | -0.546349875 | 0.597547286 | 0.597547286 | -5.490035499 |
| 1438241_at   | 0.047797324  | 6.862380677 | 0.546341654  | 0.597552715 | 0.597552715 | -5.490039692 |
| 1417779_at   | 0.038477708  | 8.23151893  | 0.546300102  | 0.597580157 | 0.597580157 | -5.490060889 |
| 1449149_at   | -0.063427415 | 4.263601901 | -0.546184354 | 0.597656604 | 0.597656604 | -5.490119926 |
| 1446368_at   | 0.042242172  | 3.361217008 | 0.54604351   | 0.597749633 | 0.597749633 | -5.490191749 |
| 1448512_at   | -0.0637484   | 4.949863495 | -0.546040026 | 0.597751934 | 0.597751934 | -5.490193525 |
| 1440938_at   | -0.056276755 | 5.126467966 | -0.546000057 | 0.597778336 | 0.597778336 | -5.490213904 |
| 1459049_at   | -0.03333404  | 3.311315243 | -0.545972389 | 0.597796612 | 0.597796612 | -5.49022801  |
| 1425199_a_at | -0.043451864 | 6.731073097 | -0.545950256 | 0.597811233 | 0.597811233 | -5.490239293 |
| 1447092_at   | 0.032937572  | 5.977959697 | 0.54593568   | 0.597820862 | 0.597820862 | -5.490246724 |
| 1455768_at   | -0.046917709 | 6.634175089 | -0.545903484 | 0.59784213  | 0.59784213  | -5.490263136 |
| 1440572_at   | 0.038134954  | 3.806082672 | 0.545846091  | 0.597880044 | 0.597880044 | -5.490292392 |
| 1460551_at   | 0.033881038  | 8.989710311 | 0.545812482  | 0.597902247 | 0.597902247 | -5.490309522 |
| 1418706_at   | -0.039018139 | 6.411387995 | -0.545788154 | 0.597918319 | 0.597918319 | -5.490321921 |

|              |              |             |              |             |             |              |
|--------------|--------------|-------------|--------------|-------------|-------------|--------------|
| 1420262_at   | 0.042745179  | 3.817451272 | 0.545743362  | 0.59794791  | 0.59794791  | -5.490344749 |
| 1423629_at   | -0.04282836  | 8.574654838 | -0.545712477 | 0.597968315 | 0.597968315 | -5.490360488 |
| 1439781_at   | -0.051955984 | 6.837498237 | -0.545705527 | 0.597972906 | 0.597972906 | -5.49036403  |
| 1425250_a_at | -0.056774352 | 3.641971792 | -0.545675255 | 0.597992906 | 0.597992906 | -5.490379456 |
| 1457101_at   | -0.047123926 | 4.524547449 | -0.545675235 | 0.59799292  | 0.59799292  | -5.490379466 |
| 1419010_x_at | -0.061070385 | 3.542617347 | -0.545673717 | 0.597993922 | 0.597993922 | -5.490380239 |
| 1442211_at   | -0.051759927 | 4.247870833 | -0.54563406  | 0.598020124 | 0.598020124 | -5.490400446 |
| 1437902_s_at | -0.04339722  | 6.455865991 | -0.545581082 | 0.598055127 | 0.598055127 | -5.490427439 |
| 1436202_at   | 0.119772508  | 9.750359274 | 0.545549312  | 0.598076117 | 0.598076117 | -5.490443624 |
| 1457055_at   | 0.05796709   | 6.289950387 | 0.545549182  | 0.598076203 | 0.598076203 | -5.49044369  |
| 1430829_s_at | -0.084876513 | 5.984998566 | -0.545545261 | 0.598078794 | 0.598078794 | -5.490445688 |
| 1430008_x_at | 0.033369717  | 3.064303622 | 0.545541295  | 0.598081415 | 0.598081415 | -5.490447709 |
| 1455291_s_at | 0.062331458  | 6.184167917 | 0.545515008  | 0.598098783 | 0.598098783 | -5.4904611   |
| 1454410_at   | -0.048904082 | 3.225746717 | -0.545393046 | 0.598179372 | 0.598179372 | -5.490523224 |
| 1427472_a_at | -0.050321046 | 4.55176322  | -0.545384027 | 0.598185332 | 0.598185332 | -5.490527817 |
| 1445445_s_at | 0.047227279  | 3.602351319 | 0.545367683  | 0.598196131 | 0.598196131 | -5.490536141 |
| 1446067_at   | -0.038236724 | 4.711701704 | -0.545320671 | 0.598227198 | 0.598227198 | -5.490560083 |
| 1427636_at   | -0.054148808 | 4.712136025 | -0.545317004 | 0.598229621 | 0.598229621 | -5.49056195  |
| 1449726_at   | 0.043335268  | 3.980189824 | 0.545231072  | 0.598286408 | 0.598286408 | -5.490605708 |
| 1438957_x_at | 0.070550753  | 9.811015432 | 0.545199598  | 0.598307207 | 0.598307207 | -5.490621733 |
| 1451771_at   | -0.056775783 | 4.611281566 | -0.545172922 | 0.598324837 | 0.598324837 | -5.490635315 |
| 1429750_at   | -0.048232374 | 4.030381144 | -0.545129547 | 0.598353503 | 0.598353503 | -5.490657397 |
| 1425399_at   | -0.05850398  | 4.922925448 | -0.545095886 | 0.598375749 | 0.598375749 | -5.490674533 |
| 1432129_a_at | -0.046674633 | 8.831762386 | -0.545056975 | 0.598401466 | 0.598401466 | -5.49069434  |
| 1454605_a_at | -0.037485351 | 8.270270827 | -0.545005211 | 0.598435679 | 0.598435679 | -5.490720688 |
| 1449189_at   | -0.033800948 | 7.951228239 | -0.544998505 | 0.598440111 | 0.598440111 | -5.490724102 |
| 1438967_x_at | 0.055211963  | 5.3009438   | 0.544997256  | 0.598440936 | 0.598440936 | -5.490724737 |
| 1436835_at   | -0.041162978 | 4.668075633 | -0.544976568 | 0.59845461  | 0.59845461  | -5.490735266 |
| 1420659_at   | -0.048797173 | 3.867617461 | -0.544950757 | 0.59847167  | 0.59847167  | -5.490748403 |
| 1418184_at   | 0.045191514  | 7.530338651 | 0.544804022  | 0.59856866  | 0.59856866  | -5.490823072 |
| 1433370_at   | 0.046724899  | 4.697965967 | 0.5447943    | 0.598575086 | 0.598575086 | -5.490828018 |
| 1438928_x_at | 0.050162721  | 9.157394734 | 0.544788784  | 0.598578733 | 0.598578733 | -5.490830825 |
| 1419385_a_at | -0.047468666 | 8.495559795 | -0.544733722 | 0.59861513  | 0.59861513  | -5.490858838 |
| 1454997_at   | -0.036256109 | 8.511969312 | -0.544729223 | 0.598618104 | 0.598618104 | -5.490861127 |
| 1456769_at   | -0.061634271 | 5.601519744 | -0.54472709  | 0.598619515 | 0.598619515 | -5.490862212 |
| 1415697_at   | -0.039307336 | 9.325993023 | -0.544706139 | 0.598633364 | 0.598633364 | -5.49087287  |
| 1416288_at   | 0.033887201  | 11.79283266 | 0.544645222  | 0.598673635 | 0.598673635 | -5.490903859 |
| 1427162_a_at | 0.048303951  | 9.090218396 | 0.544632526  | 0.598682028 | 0.598682028 | -5.490910317 |
| 1426392_a_at | 0.039861637  | 10.77676976 | 0.544597557  | 0.598705145 | 0.598705145 | -5.490928103 |
| 1438113_at   | 0.06175401   | 3.714905721 | 0.544587516  | 0.598711783 | 0.598711783 | -5.49093321  |
| 1422575_at   | -0.045494443 | 5.314515021 | -0.544567185 | 0.598725224 | 0.598725224 | -5.49094355  |
| 1428561_at   | 0.038190179  | 9.133340943 | 0.544561087  | 0.598729256 | 0.598729256 | -5.490946652 |
| 1449538_a_at | -0.045137485 | 4.798704794 | -0.544524854 | 0.59875321  | 0.59875321  | -5.490965079 |
| 1456183_at   | 0.037938078  | 3.724249692 | 0.544470623  | 0.598789064 | 0.598789064 | -5.490992658 |
| 1447232_at   | 0.055990157  | 3.244887418 | 0.544461132  | 0.598795339 | 0.598795339 | -5.490997484 |
| 1442803_at   | 0.057150842  | 4.4141219   | 0.544430096  | 0.598815859 | 0.598815859 | -5.491013265 |
| 1417168_a_at | 0.076541974  | 6.399916055 | 0.544426841  | 0.598818011 | 0.598818011 | -5.491014921 |
| 1440459_at   | -0.067100133 | 4.912744096 | -0.544281394 | 0.598914179 | 0.598914179 | -5.491088867 |
| 1423598_at   | 0.036437368  | 6.46509914  | 0.544244817  | 0.598938365 | 0.598938365 | -5.491107461 |
| 1460486_at   | 0.05198578   | 7.160253425 | 0.544216561  | 0.598957049 | 0.598957049 | -5.491121823 |
| 1438495_at   | 0.03502631   | 8.040240512 | 0.544203628  | 0.598965601 | 0.598965601 | -5.491128397 |
| 1459046_at   | -0.0434058   | 3.753266077 | -0.544122156 | 0.599019475 | 0.599019475 | -5.491169805 |
| 1459841_x_at | -0.041213328 | 3.444524437 | -0.544104383 | 0.599031229 | 0.599031229 | -5.491178837 |

|              |              |             |              |             |             |              |
|--------------|--------------|-------------|--------------|-------------|-------------|--------------|
| 1437273_at   | 0.043347587  | 3.482243375 | 0.544095178  | 0.599037316 | 0.599037316 | -5.491183515 |
| 1437658_a_at | -0.049033944 | 8.287098379 | -0.544030627 | 0.599080004 | 0.599080004 | -5.491216317 |
| 1436270_at   | 0.04398205   | 7.306990136 | 0.544028051  | 0.599081707 | 0.599081707 | -5.491217626 |
| 1436347_a_at | -0.111614703 | 6.922412478 | -0.543987588 | 0.599108466 | 0.599108466 | -5.491238186 |
| 1427433_s_at | 0.041101081  | 3.47142566  | 0.543902987  | 0.599164417 | 0.599164417 | -5.491281168 |
| 1426517_at   | 0.048436341  | 5.684224021 | 0.543889976  | 0.599173022 | 0.599173022 | -5.491287778 |
| 1449391_at   | 0.051889135  | 6.295415254 | 0.543834862  | 0.599209473 | 0.599209473 | -5.491315775 |
| 1459967_at   | 0.047060366  | 5.115011371 | 0.543781883  | 0.599244514 | 0.599244514 | -5.491342684 |
| 1435561_at   | -0.042481077 | 8.01818339  | -0.543750985 | 0.59926495  | 0.59926495  | -5.491358378 |
| 1432653_at   | -0.032585726 | 3.192739873 | -0.543747927 | 0.599266973 | 0.599266973 | -5.491359931 |
| 1439387_x_at | 0.052013526  | 8.919952338 | 0.543681853  | 0.599310677 | 0.599310677 | -5.491393487 |
| 1420353_at   | 0.066361432  | 4.081876941 | 0.543679343  | 0.599312337 | 0.599312337 | -5.491394762 |
| 1454477_at   | -0.074217479 | 4.29440062  | -0.543653103 | 0.599329693 | 0.599329693 | -5.491408086 |
| 1447012_at   | 0.055613339  | 3.669625101 | 0.543650808  | 0.599331212 | 0.599331212 | -5.491409252 |
| 1451903_at   | 0.039780242  | 3.645871035 | 0.543630681  | 0.599344525 | 0.599344525 | -5.491419472 |
| 1445697_at   | 0.039378944  | 5.304472011 | 0.54363003   | 0.599344955 | 0.599344955 | -5.491419803 |
| 1454010_a_at | -0.0563061   | 4.861538792 | -0.543588485 | 0.599372437 | 0.599372437 | -5.491440898 |
| 1460686_at   | -0.062086236 | 5.61683981  | -0.543572964 | 0.599382704 | 0.599382704 | -5.491448778 |
| 1444258_at   | 0.067118161  | 6.149902548 | 0.543536711  | 0.599406685 | 0.599406685 | -5.491467185 |
| 1423601_s_at | 0.065083249  | 7.096636743 | 0.543485156  | 0.599440789 | 0.599440789 | -5.491493358 |
| 1454056_at   | 0.04672002   | 5.929523057 | 0.543418798  | 0.599484688 | 0.599484688 | -5.491527043 |
| 1422868_s_at | -0.033421112 | 3.489530272 | -0.543406096 | 0.599493091 | 0.599493091 | -5.491533491 |
| 1416841_at   | 0.045456481  | 8.70287905  | 0.543398835  | 0.599497895 | 0.599497895 | -5.491537177 |
| 1454964_at   | 0.041061891  | 9.985026937 | 0.54335744   | 0.59952528  | 0.59952528  | -5.491558187 |
| 1436901_at   | -0.05925662  | 4.111395614 | -0.543326735 | 0.599545594 | 0.599545594 | -5.491573771 |
| 1457894_at   | -0.045053413 | 3.412774014 | -0.54331525  | 0.599553192 | 0.599553192 | -5.491579599 |
| 1428680_at   | -0.088418938 | 7.433858235 | -0.543278447 | 0.599577542 | 0.599577542 | -5.491598277 |
| 1449148_a_at | -0.040197119 | 9.25066416  | -0.543271124 | 0.599582386 | 0.599582386 | -5.491601993 |
| 1421231_at   | 0.036981206  | 3.544107852 | 0.543194556  | 0.599633045 | 0.599633045 | -5.491640846 |
| 1443265_at   | -0.045759734 | 3.219737534 | -0.543190833 | 0.599635509 | 0.599635509 | -5.491642736 |
| 1433901_at   | 0.039518537  | 10.01673999 | 0.543188316  | 0.599637174 | 0.599637174 | -5.491644012 |
| 1438175_x_at | -0.204681302 | 5.796125548 | -0.543174225 | 0.599646497 | 0.599646497 | -5.491651162 |
| 1420814_at   | -0.036348512 | 11.52751018 | -0.543169781 | 0.599649438 | 0.599649438 | -5.491653417 |
| 1428441_at   | 0.067110124  | 7.91850054  | 0.543065706  | 0.599718301 | 0.599718301 | -5.491706218 |
| 1445562_at   | -0.039990134 | 4.286049819 | -0.543036112 | 0.599737883 | 0.599737883 | -5.49172123  |
| 1453624_at   | -0.040137691 | 3.777902824 | -0.543001115 | 0.599761041 | 0.599761041 | -5.491738983 |
| 1417448_at   | 0.037938379  | 8.184895094 | 0.542873733  | 0.599845335 | 0.599845335 | -5.491803588 |
| 1430981_s_at | 0.052623242  | 9.17805101  | 0.542840129  | 0.599867573 | 0.599867573 | -5.491820629 |
| 1447962_at   | 0.079237512  | 4.59145163  | 0.542781975  | 0.599906058 | 0.599906058 | -5.491850117 |
| 1423191_at   | -0.043523132 | 9.359144684 | -0.542754337 | 0.599924349 | 0.599924349 | -5.491864131 |
| 1436824_x_at | 0.043655384  | 10.38196893 | 0.542750123  | 0.599927138 | 0.599927138 | -5.491866267 |
| 1446871_at   | 0.043370342  | 4.350181956 | 0.542704181  | 0.599957543 | 0.599957543 | -5.49188956  |
| 1459220_at   | 0.044010956  | 4.326279673 | 0.542685009  | 0.599970232 | 0.599970232 | -5.491899279 |
| 1437080_s_at | 0.040259915  | 11.40615038 | 0.542683582  | 0.599971176 | 0.599971176 | -5.491900003 |
| 1455109_at   | -0.073463279 | 6.75792188  | -0.542671313 | 0.599979296 | 0.599979296 | -5.491906222 |
| 1460350_at   | -0.036767409 | 9.444312458 | -0.542667323 | 0.599981937 | 0.599981937 | -5.491908245 |
| 1435728_at   | 0.047434122  | 6.057855358 | 0.542603744  | 0.600024017 | 0.600024017 | -5.491940474 |
| 1437817_at   | -0.053097295 | 4.026550962 | -0.542582504 | 0.600038075 | 0.600038075 | -5.491951241 |
| 1424329_a_at | 0.041708047  | 6.558069552 | 0.542559562  | 0.60005326  | 0.60005326  | -5.491962869 |
| 1432005_at   | -0.052252745 | 4.726724519 | -0.542541955 | 0.600064914 | 0.600064914 | -5.491971793 |
| 1435798_a_at | 0.071090161  | 8.572261569 | 0.542474866  | 0.60010932  | 0.60010932  | -5.492005794 |
| 1439543_at   | -0.055292432 | 5.765592504 | -0.542471059 | 0.60011184  | 0.60011184  | -5.492007723 |
| 1453902_at   | 0.047381055  | 4.430645522 | 0.542445705  | 0.600128622 | 0.600128622 | -5.492020572 |

|              |              |             |              |             |             |              |
|--------------|--------------|-------------|--------------|-------------|-------------|--------------|
| 1453882_at   | 0.050751971  | 3.724198449 | 0.542358464  | 0.600186371 | 0.600186371 | -5.492064778 |
| 1435145_at   | 0.038651202  | 3.701372897 | 0.542318187  | 0.600213033 | 0.600213033 | -5.492085185 |
| 1448047_at   | -0.06965855  | 4.949098724 | -0.542262182 | 0.600250108 | 0.600250108 | -5.492113558 |
| 1423214_at   | 0.086561207  | 4.606063643 | 0.542223865  | 0.600275474 | 0.600275474 | -5.492132968 |
| 1438010_at   | 0.073307329  | 7.690613179 | 0.542125659  | 0.600340489 | 0.600340489 | -5.492182711 |
| 1435228_at   | -0.049419886 | 9.539094835 | -0.542108121 | 0.600352101 | 0.600352101 | -5.492191593 |
| 1433915_s_at | 0.060448891  | 7.782604585 | 0.542055048  | 0.600387238 | 0.600387238 | -5.492218471 |
| 1447788_s_at | 0.071260049  | 8.209391294 | 0.542012189  | 0.600415615 | 0.600415615 | -5.492240175 |
| 1446262_at   | 0.059353463  | 4.892554478 | 0.541913189  | 0.600481164 | 0.600481164 | -5.492290302 |
| 1418769_at   | -0.159931769 | 6.449845283 | -0.541813693 | 0.600547045 | 0.600547045 | -5.492340671 |
| 1416854_at   | -0.049588756 | 5.906636417 | -0.541780253 | 0.600569189 | 0.600569189 | -5.492357598 |
| 1428610_at   | -0.047791538 | 6.286572496 | -0.541726979 | 0.600604466 | 0.600604466 | -5.492384563 |
| 1424242_at   | -0.053023101 | 9.427777963 | -0.541683284 | 0.600633402 | 0.600633402 | -5.492406677 |
| 1459394_at   | -0.038700842 | 3.775620696 | -0.541625254 | 0.600671831 | 0.600671831 | -5.492436044 |
| 1459103_at   | 0.058540955  | 3.972838486 | 0.541598735  | 0.600689394 | 0.600689394 | -5.492449463 |
| 1423544_at   | -0.050731107 | 4.789266252 | -0.541417068 | 0.600809709 | 0.600809709 | -5.492541375 |
| 1433705_at   | 0.055912361  | 6.584969911 | 0.541394445  | 0.600824693 | 0.600824693 | -5.492552819 |
| 1424536_at   | -0.063882742 | 6.731681239 | -0.541356477 | 0.600849841 | 0.600849841 | -5.492572024 |
| 1458128_at   | -0.047596379 | 7.684789589 | -0.541337844 | 0.600862182 | 0.600862182 | -5.492581448 |
| 1432864_at   | -0.043286797 | 5.094941643 | -0.541292062 | 0.600892506 | 0.600892506 | -5.492604603 |
| 1444760_at   | 0.072953492  | 4.510293168 | 0.541234329  | 0.600930748 | 0.600930748 | -5.49263338  |
| 1455880_s_at | 0.06449838   | 9.524054606 | 0.541195585  | 0.600956412 | 0.600956412 | -5.492653392 |
| 1421611_at   | 0.048680191  | 4.210405634 | 0.541181437  | 0.600965784 | 0.600965784 | -5.492660546 |
| 1460479_at   | 0.056849874  | 3.906753136 | 0.541175103  | 0.60096998  | 0.60096998  | -5.492663749 |
| 1447720_x_at | 0.052059775  | 9.760193388 | 0.54108218   | 0.601031535 | 0.601031535 | -5.492710732 |
| 1447200_at   | -0.05939428  | 4.054943348 | -0.541077483 | 0.601034646 | 0.601034646 | -5.492713106 |
| 1439488_at   | -0.05005518  | 7.963883981 | -0.54104435  | 0.601056596 | 0.601056596 | -5.492729856 |
| 1446643_at   | 0.046294116  | 5.17136492  | 0.541029552  | 0.601066399 | 0.601066399 | -5.492737337 |
| 1455838_at   | -0.061839688 | 5.506328538 | -0.540962119 | 0.601111072 | 0.601111072 | -5.492771424 |
| 1456934_at   | 0.034039638  | 3.118679603 | 0.540957556  | 0.601114095 | 0.601114095 | -5.49277373  |
| 1451277_at   | -0.047134696 | 8.707404099 | -0.540952963 | 0.601117138 | 0.601117138 | -5.492776052 |
| 1446409_at   | -0.048219834 | 6.172427351 | -0.540835508 | 0.601194955 | 0.601194955 | -5.492835414 |
| 1451947_at   | -0.034764726 | 3.567896654 | -0.540785379 | 0.601228169 | 0.601228169 | -5.492860745 |
| 1425606_at   | 0.067673422  | 4.179590935 | 0.540775189  | 0.60123492  | 0.60123492  | -5.492865894 |
| 1441666_at   | 0.041112521  | 3.643506392 | 0.540774171  | 0.601235595 | 0.601235595 | -5.492866409 |
| 1430552_a_at | 0.062640955  | 7.103529158 | 0.540727901  | 0.601266252 | 0.601266252 | -5.492889788 |
| 1434856_at   | -0.04262908  | 9.976482847 | -0.540654313 | 0.601315011 | 0.601315011 | -5.492926966 |
| 1447149_at   | 0.050373481  | 3.576005466 | 0.540603559  | 0.601348643 | 0.601348643 | -5.492952606 |
| 1430795_at   | 0.036487385  | 4.387933132 | 0.540551646  | 0.601383042 | 0.601383042 | -5.492978828 |
| 1427868_x_at | -0.074614164 | 3.575055968 | -0.540472242 | 0.601435662 | 0.601435662 | -5.493018933 |
| 1430931_at   | -0.047582973 | 3.619258482 | -0.540419799 | 0.601470415 | 0.601470415 | -5.493045417 |
| 1431768_a_at | 0.063125977  | 6.246112884 | 0.540386017  | 0.601492803 | 0.601492803 | -5.493062476 |
| 1459262_at   | -0.052525314 | 3.299081208 | -0.540378984 | 0.601497464 | 0.601497464 | -5.493066028 |
| 1431705_a_at | -0.057680402 | 4.360377728 | -0.54031988  | 0.601536634 | 0.601536634 | -5.49309587  |
| 1448879_at   | 0.03731521   | 11.03172    | 0.540251182  | 0.601582164 | 0.601582164 | -5.493130554 |
| 1439101_at   | -0.053305129 | 4.477846549 | -0.540235552 | 0.601592523 | 0.601592523 | -5.493138445 |
| 1430614_at   | 0.04392186   | 7.313100452 | 0.540233791  | 0.60159369  | 0.60159369  | -5.493139334 |
| 1444531_at   | 0.043116822  | 4.141354579 | 0.540211461  | 0.601608491 | 0.601608491 | -5.493150606 |
| 1423380_s_at | -0.048630825 | 10.20904834 | -0.540204703 | 0.601612969 | 0.601612969 | -5.493154018 |
| 1434998_at   | 0.036310221  | 10.23840665 | 0.540169357  | 0.601636397 | 0.601636397 | -5.49317186  |
| 1439481_at   | 0.037646455  | 8.550541953 | 0.540147013  | 0.601651207 | 0.601651207 | -5.493183139 |
| 1428095_a_at | 0.043953577  | 6.838070547 | 0.540143742  | 0.601653375 | 0.601653375 | -5.49318479  |
| 1452155_a_at | 0.035193696  | 12.15998196 | 0.540141632  | 0.601654773 | 0.601654773 | -5.493185854 |

|              |              |             |              |             |             |              |
|--------------|--------------|-------------|--------------|-------------|-------------|--------------|
| 1455363_at   | 0.033873772  | 5.829335722 | 0.540078727  | 0.601696468 | 0.601696468 | -5.493217604 |
| 1455690_at   | -0.038411122 | 5.206369352 | -0.540078019 | 0.601696938 | 0.601696938 | -5.493217961 |
| 1443742_x_at | -0.038151879 | 8.413103284 | -0.540059046 | 0.601709514 | 0.601709514 | -5.493227536 |
| 1447479_at   | -0.051046167 | 3.70304546  | -0.540006577 | 0.601744293 | 0.601744293 | -5.493254015 |
| 1446931_at   | 0.039261446  | 3.876495435 | 0.539920979  | 0.601801034 | 0.601801034 | -5.493297207 |
| 1452209_at   | 0.038117771  | 9.912012072 | 0.539900796  | 0.601814414 | 0.601814414 | -5.49330739  |
| 1441381_at   | 0.039783523  | 6.556083708 | 0.539836655  | 0.601856934 | 0.601856934 | -5.49333975  |
| 1438085_at   | -0.083082948 | 5.022257737 | -0.539834622 | 0.601858281 | 0.601858281 | -5.493340775 |
| 1444327_at   | -0.043503351 | 4.39523143  | -0.539829269 | 0.60186183  | 0.60186183  | -5.493343476 |
| 1458126_at   | 0.04810398   | 6.441623956 | 0.539744077  | 0.601918309 | 0.601918309 | -5.49338645  |
| 1437550_at   | -0.050998143 | 8.55454856  | -0.539722071 | 0.601932897 | 0.601932897 | -5.493397549 |
| 1421184_a_at | -0.060691706 | 7.367182441 | -0.539658862 | 0.601974804 | 0.601974804 | -5.493429429 |
| 1440289_at   | 0.051693645  | 5.429721545 | 0.539569402  | 0.602034118 | 0.602034118 | -5.493474542 |
| 1457761_at   | 0.053768142  | 5.345587915 | 0.539549824  | 0.602047099 | 0.602047099 | -5.493484415 |
| 1451851_a_at | -0.048349256 | 3.557092106 | -0.539485605 | 0.602089679 | 0.602089679 | -5.493516794 |
| 1417546_at   | 0.053305375  | 5.512044168 | 0.539484646  | 0.602090315 | 0.602090315 | -5.493517277 |
| 1441734_at   | -0.033998622 | 5.943679496 | -0.539424659 | 0.602130091 | 0.602130091 | -5.49354752  |
| 1429157_at   | -0.038954031 | 4.100799799 | -0.539381788 | 0.602158519 | 0.602158519 | -5.493569131 |
| 1444012_at   | -0.058264733 | 4.939203103 | -0.539341244 | 0.602185405 | 0.602185405 | -5.493589568 |
| 1453040_at   | 0.074267929  | 6.528112717 | 0.539250782  | 0.602245393 | 0.602245393 | -5.493635162 |
| 1423098_at   | -0.034706797 | 9.307710268 | -0.539237079 | 0.60225448  | 0.60225448  | -5.493642067 |
| 1460037_at   | -0.03662432  | 9.968083096 | -0.539221877 | 0.602264562 | 0.602264562 | -5.493649729 |
| 1456001_at   | 0.041144137  | 4.523135987 | 0.539199949  | 0.602279104 | 0.602279104 | -5.493660779 |
| 1436610_at   | -0.04089894  | 5.878883921 | -0.539141814 | 0.602317658 | 0.602317658 | -5.493690073 |
| 1449623_at   | 0.045871292  | 7.249401717 | 0.539120804  | 0.602331592 | 0.602331592 | -5.493700659 |
| 1453981_at   | -0.037434149 | 3.879396501 | -0.539106418 | 0.602341133 | 0.602341133 | -5.493707907 |
| 1419003_at   | -0.069466265 | 5.842402851 | -0.539093167 | 0.602349921 | 0.602349921 | -5.493714584 |
| 1434096_at   | -0.04339614  | 5.84725274  | -0.539046467 | 0.602380894 | 0.602380894 | -5.493738112 |
| 1439412_at   | -0.05936621  | 4.321122783 | -0.539030973 | 0.60239117  | 0.60239117  | -5.493745918 |
| 1440912_at   | 0.0400301    | 4.200005775 | 0.539026062  | 0.602394427 | 0.602394427 | -5.493748392 |
| 1436844_at   | 0.070803081  | 6.457125495 | 0.538939044  | 0.602452143 | 0.602452143 | -5.493792226 |
| 1449020_at   | 0.056608592  | 9.656180689 | 0.538914587  | 0.602468365 | 0.602468365 | -5.493804545 |
| 1418056_at   | 0.040519331  | 4.917868353 | 0.538869098  | 0.602498537 | 0.602498537 | -5.493827456 |
| 1443008_at   | 0.079257887  | 5.153909324 | 0.538866896  | 0.602499998 | 0.602499998 | -5.493828564 |
| 1459569_at   | -0.050955327 | 5.480968516 | -0.538729716 | 0.602590993 | 0.602590993 | -5.493897645 |
| 1440395_at   | -0.054958001 | 4.529794071 | -0.538701142 | 0.602609948 | 0.602609948 | -5.493912032 |
| 1448745_s_at | 0.060151302  | 4.42509876  | 0.538657111  | 0.602639157 | 0.602639157 | -5.4939342   |
| 1419787_a_at | 0.036497417  | 7.428509644 | 0.538635271  | 0.602653645 | 0.602653645 | -5.493945196 |
| 1422083_at   | -0.051082353 | 6.342842828 | -0.538631048 | 0.602656447 | 0.602656447 | -5.493947322 |
| 1441045_at   | 0.066583341  | 3.630044217 | 0.538605881  | 0.602673143 | 0.602673143 | -5.493959991 |
| 1423818_a_at | -0.041612889 | 10.93648071 | -0.538594695 | 0.602680563 | 0.602680563 | -5.493965622 |
| 1426195_a_at | -0.064864888 | 10.56943834 | -0.538581925 | 0.602689035 | 0.602689035 | -5.49397205  |
| 1419999_at   | -0.055085829 | 6.279460303 | -0.538472484 | 0.602761642 | 0.602761642 | -5.494027137 |
| 1438584_at   | -0.033061288 | 4.401916022 | -0.53847198  | 0.602761976 | 0.602761976 | -5.49402739  |
| 1450203_at   | -0.152812612 | 6.280101528 | -0.538425778 | 0.60279263  | 0.60279263  | -5.494050642 |
| 1446837_at   | 0.04189793   | 3.265038097 | 0.538424108  | 0.602793738 | 0.602793738 | -5.494051483 |
| 1431048_at   | -0.059889457 | 3.638249871 | -0.53842363  | 0.602794055 | 0.602794055 | -5.494051723 |
| 1441591_at   | -0.038400641 | 4.712384087 | -0.538420078 | 0.602796412 | 0.602796412 | -5.494053511 |
| 1430480_at   | -0.039838121 | 4.428540576 | -0.53835425  | 0.602840088 | 0.602840088 | -5.494086636 |
| 1429655_at   | 0.045416542  | 8.232481559 | 0.538340847  | 0.60284898  | 0.60284898  | -5.49409338  |
| 1429349_at   | -0.051875282 | 3.571710793 | -0.538320943 | 0.602862187 | 0.602862187 | -5.494103395 |
| 1429411_a_at | -0.075365111 | 9.14469215  | -0.538299909 | 0.602876143 | 0.602876143 | -5.494113979 |
| 1444247_at   | -0.056622994 | 3.615699506 | -0.538261053 | 0.602901925 | 0.602901925 | -5.494133528 |

|              |              |             |              |             |             |              |
|--------------|--------------|-------------|--------------|-------------|-------------|--------------|
| 1450369_at   | -0.070013597 | 4.551693591 | -0.538252937 | 0.602907311 | 0.602907311 | -5.494137612 |
| 1434490_at   | 0.04978849   | 5.759836375 | 0.53824819   | 0.60291046  | 0.60291046  | -5.49414     |
| 1439438_a_at | 0.053642839  | 10.30104472 | 0.538233185  | 0.602920417 | 0.602920417 | -5.494147549 |
| 1435476_a_at | -0.049866377 | 8.004170424 | -0.538135527 | 0.602985219 | 0.602985219 | -5.494196674 |
| 1446300_at   | -0.039256027 | 4.432851924 | -0.538135244 | 0.602985407 | 0.602985407 | -5.494196817 |
| 1426420_at   | 0.064032591  | 5.276877022 | 0.538103443  | 0.60300651  | 0.60300651  | -5.494212812 |
| 1428486_at   | -0.047620976 | 3.727953911 | -0.538101573 | 0.603007751 | 0.603007751 | -5.494213753 |
| 1417767_at   | -0.049934499 | 8.400793009 | -0.538066306 | 0.603031154 | 0.603031154 | -5.494231491 |
| 1456470_x_at | -0.043185119 | 7.259463222 | -0.538045057 | 0.603045256 | 0.603045256 | -5.494242177 |
| 1420953_at   | 0.049260201  | 9.779037327 | 0.537990053  | 0.603081758 | 0.603081758 | -5.494269839 |
| 1421296_at   | 0.053215521  | 4.472899068 | 0.537941653  | 0.603113878 | 0.603113878 | -5.494294177 |
| 1436444_at   | 0.045744902  | 4.387509481 | 0.537936235  | 0.603117474 | 0.603117474 | -5.494296901 |
| 1460225_at   | -0.042366561 | 6.409610959 | -0.537931405 | 0.603120679 | 0.603120679 | -5.494299329 |
| 1443317_at   | 0.062798313  | 4.623682214 | 0.537885543  | 0.603151117 | 0.603151117 | -5.494322389 |
| 1449312_at   | 0.044622481  | 3.439589561 | 0.537866729  | 0.603163603 | 0.603163603 | -5.494331848 |
| 1448709_at   | -0.036218828 | 10.15939112 | -0.537815019 | 0.603197923 | 0.603197923 | -5.494357845 |
| 1444703_at   | 0.04986254   | 4.49724451  | 0.537812707  | 0.603199457 | 0.603199457 | -5.494359007 |
| 1451664_x_at | 0.054017622  | 4.657757741 | 0.537731649  | 0.603253258 | 0.603253258 | -5.494399753 |
| 1449620_s_at | -0.059567663 | 6.082345899 | -0.537707574 | 0.603269237 | 0.603269237 | -5.494411854 |
| 1456465_at   | -0.059464954 | 5.44309291  | -0.537681796 | 0.603286347 | 0.603286347 | -5.494424811 |
| 1454617_at   | 0.053815699  | 9.26758079  | 0.537623089  | 0.603325315 | 0.603325315 | -5.494454315 |
| 1450054_at   | 0.050105874  | 10.94665593 | 0.537596048  | 0.603343264 | 0.603343264 | -5.494467904 |
| 1457167_at   | -0.042678612 | 5.105032367 | -0.537586997 | 0.603349272 | 0.603349272 | -5.494472453 |
| 1432985_at   | -0.036299243 | 4.344519918 | -0.537581547 | 0.60335289  | 0.60335289  | -5.494475192 |
| 1445072_at   | -0.043208235 | 4.078816241 | -0.537483726 | 0.603417825 | 0.603417825 | -5.494524344 |
| 1446325_at   | -0.050741712 | 4.862939332 | -0.537477228 | 0.603422138 | 0.603422138 | -5.494527608 |
| 1435748_at   | 0.049764082  | 5.369544035 | 0.537395481  | 0.603476407 | 0.603476407 | -5.494568678 |
| 1443740_at   | -0.038873692 | 3.300275013 | -0.537389574 | 0.603480328 | 0.603480328 | -5.494571645 |
| 1420382_at   | -0.05632393  | 5.746214532 | -0.537345479 | 0.603509602 | 0.603509602 | -5.494593795 |
| 1452962_at   | 0.053844707  | 5.232093181 | 0.53731335   | 0.603530932 | 0.603530932 | -5.494609933 |
| 1452488_at   | 0.056702189  | 5.205483047 | 0.537271101  | 0.603558982 | 0.603558982 | -5.494631154 |
| 1419506_at   | -0.055054427 | 8.472447236 | -0.537250176 | 0.603572874 | 0.603572874 | -5.494641663 |
| 1457464_at   | -0.053234181 | 8.659142943 | -0.537243701 | 0.603577172 | 0.603577172 | -5.494644914 |
| 1460640_at   | 0.055355754  | 3.581963796 | 0.537243044  | 0.603577609 | 0.603577609 | -5.494645245 |
| 1445622_at   | -0.064582199 | 5.216442585 | -0.537215215 | 0.603596085 | 0.603596085 | -5.49465922  |
| 1446024_at   | -0.050192204 | 3.710317778 | -0.537204926 | 0.603602917 | 0.603602917 | -5.494664387 |
| 1439156_at   | -0.058203671 | 5.56540893  | -0.53720192  | 0.603604912 | 0.603604912 | -5.494665897 |
| 1435224_at   | 0.044122702  | 9.856933846 | 0.537168893  | 0.603626841 | 0.603626841 | -5.494682482 |
| 1452247_at   | -0.056118778 | 8.218382124 | -0.53710175  | 0.603671422 | 0.603671422 | -5.494716197 |
| 1460287_at   | -0.055858567 | 10.57362652 | -0.537053725 | 0.60370331  | 0.60370331  | -5.494740309 |
| 1449113_at   | -0.041659256 | 7.40824447  | -0.537053393 | 0.60370353  | 0.60370353  | -5.494740475 |
| 1430188_at   | -0.039549765 | 5.999202272 | -0.537029214 | 0.603719585 | 0.603719585 | -5.494752614 |
| 1458811_at   | 0.101384262  | 5.599084624 | 0.537001826  | 0.603737771 | 0.603737771 | -5.494766363 |
| 1440441_at   | -0.041431886 | 10.08901682 | -0.536997225 | 0.603740826 | 0.603740826 | -5.494768673 |
| 1441688_at   | -0.040283793 | 7.967683274 | -0.536991224 | 0.603744811 | 0.603744811 | -5.494771686 |
| 1428983_at   | 0.084085173  | 4.912756539 | 0.536974283  | 0.60375606  | 0.60375606  | -5.49478019  |
| 1429387_at   | -0.039920393 | 5.023287771 | -0.53695448  | 0.60376921  | 0.60376921  | -5.494790131 |
| 1448189_a_at | -0.047447121 | 8.446020375 | -0.536798009 | 0.603873117 | 0.603873117 | -5.494868664 |
| 1443340_at   | -0.043827258 | 5.282802289 | -0.536637033 | 0.603980025 | 0.603980025 | -5.494949435 |
| 1437180_at   | -0.048734155 | 8.981248269 | -0.536501947 | 0.604069747 | 0.604069747 | -5.495017199 |
| 1453156_s_at | 0.058805457  | 5.897677493 | 0.536473448  | 0.604088677 | 0.604088677 | -5.495031493 |
| 1429500_at   | 0.052529433  | 4.39464564  | 0.536465451  | 0.604093988 | 0.604093988 | -5.495035503 |
| 1448386_a_at | -0.041159671 | 4.697320561 | -0.536371952 | 0.604156094 | 0.604156094 | -5.495082393 |

|              |              |             |              |             |             |              |
|--------------|--------------|-------------|--------------|-------------|-------------|--------------|
| 1432992_at   | -0.043607078 | 4.032432378 | -0.536365495 | 0.604160383 | 0.604160383 | -5.495085631 |
| 1433763_at   | -0.070738192 | 7.093438328 | -0.536311723 | 0.604196103 | 0.604196103 | -5.495112594 |
| 1430042_at   | -0.060593096 | 5.913134483 | -0.536306828 | 0.604199354 | 0.604199354 | -5.495115049 |
| 1430192_at   | 0.049761199  | 5.564000014 | 0.536251571  | 0.604236061 | 0.604236061 | -5.495142753 |
| 1460064_at   | 0.050678358  | 4.449535619 | 0.536246225  | 0.604239612 | 0.604239612 | -5.495145433 |
| 1455078_at   | -0.05112129  | 8.283799783 | -0.53624177  | 0.604242572 | 0.604242572 | -5.495147667 |
| 1444210_at   | -0.051050954 | 4.746870784 | -0.536226558 | 0.604252678 | 0.604252678 | -5.495155294 |
| 1427599_at   | 0.038843819  | 3.957131919 | 0.536171618  | 0.604289176 | 0.604289176 | -5.495182835 |
| 1448463_at   | 0.033022181  | 9.854115311 | 0.536168446  | 0.604291283 | 0.604291283 | -5.495184425 |
| 1446257_at   | 0.0585479    | 5.478232377 | 0.53605946   | 0.604363689 | 0.604363689 | -5.495239053 |
| 1446771_at   | -0.046389412 | 4.029620502 | -0.53604553  | 0.604372943 | 0.604372943 | -5.495246034 |
| 1429118_a_at | 0.059007449  | 5.595330816 | 0.536032324  | 0.604381717 | 0.604381717 | -5.495252653 |
| 1440637_at   | -0.049398195 | 7.248369434 | -0.535943552 | 0.604440697 | 0.604440697 | -5.495297139 |
| 1430913_at   | -0.042827928 | 3.507970913 | -0.535942594 | 0.604441334 | 0.604441334 | -5.495297619 |
| 1426256_at   | -0.046084722 | 10.0568393  | -0.535910508 | 0.604462653 | 0.604462653 | -5.495313696 |
| 1434881_s_at | 0.04784739   | 11.1223547  | 0.535907848  | 0.604464421 | 0.604464421 | -5.495315029 |
| 1441679_at   | -0.052261143 | 7.615160029 | -0.535869966 | 0.604489591 | 0.604489591 | -5.49533401  |
| 1435683_a_at | 0.037295807  | 7.8543065   | 0.535791829  | 0.60454151  | 0.60454151  | -5.495373155 |
| 1455819_at   | 0.034615379  | 9.74059454  | 0.535750551  | 0.604568939 | 0.604568939 | -5.495393833 |
| 1443756_at   | 0.043740352  | 3.154121027 | 0.535676518  | 0.604618135 | 0.604618135 | -5.495430915 |
| 1439415_x_at | 0.099557568  | 7.817938401 | 0.535666373  | 0.604624877 | 0.604624877 | -5.495435996 |
| 1450600_at   | 0.043409072  | 5.266307941 | 0.535611615  | 0.604661265 | 0.604661265 | -5.49546342  |
| 1457138_x_at | -0.046935582 | 3.706001171 | -0.535592268 | 0.604674123 | 0.604674123 | -5.495473109 |
| 1454162_at   | -0.041481453 | 4.128591929 | -0.535524387 | 0.604719234 | 0.604719234 | -5.4955071   |
| 1450057_at   | 0.03391921   | 7.70485423  | 0.535511543  | 0.60472777  | 0.60472777  | -5.495513531 |
| 1434093_at   | 0.045173216  | 5.809795885 | 0.535507698  | 0.604730325 | 0.604730325 | -5.495515456 |
| 1445951_at   | -0.035993486 | 3.430749546 | -0.53548566  | 0.604744971 | 0.604744971 | -5.495526491 |
| 1448597_at   | -0.045235913 | 7.964289928 | -0.535461944 | 0.604760733 | 0.604760733 | -5.495538365 |
| 1434888_a_at | 0.053085793  | 11.40021237 | 0.535410442  | 0.604794962 | 0.604794962 | -5.495564149 |
| 1455159_at   | 0.046459516  | 9.173780049 | 0.535275384  | 0.604884729 | 0.604884729 | -5.495631754 |
| 1417234_at   | 0.063867627  | 8.288411012 | 0.53522135   | 0.604920645 | 0.604920645 | -5.495658797 |
| 1424141_at   | 0.034015664  | 10.19772054 | 0.535210715  | 0.604927713 | 0.604927713 | -5.495664119 |
| 1430576_at   | 0.054560909  | 6.737547526 | 0.535198192  | 0.604936038 | 0.604936038 | -5.495670386 |
| 1422740_at   | 0.03705491   | 6.24668811  | 0.535169134  | 0.604955353 | 0.604955353 | -5.495684927 |
| 1430649_at   | 0.038377061  | 5.608891489 | 0.535160162  | 0.604961317 | 0.604961317 | -5.495689417 |
| 1438488_at   | -0.04422553  | 3.366999849 | -0.535157576 | 0.604963036 | 0.604963036 | -5.495690711 |
| 1432057_a_at | 0.037053324  | 9.142536492 | 0.535147315  | 0.604969856 | 0.604969856 | -5.495695846 |
| 1425540_at   | 0.042606235  | 3.207908329 | 0.535140498  | 0.604974388 | 0.604974388 | -5.495699257 |
| 1418258_s_at | 0.034461048  | 10.51120902 | 0.535129245  | 0.604981868 | 0.604981868 | -5.495704888 |
| 1429140_at   | 0.049524625  | 5.979096188 | 0.535087499  | 0.605009619 | 0.605009619 | -5.495725776 |
| 1430445_at   | -0.043763037 | 3.592128087 | -0.534979611 | 0.605081339 | 0.605081339 | -5.495779751 |
| 1460665_a_at | -0.039185512 | 8.124202259 | -0.534940745 | 0.605107178 | 0.605107178 | -5.495799193 |
| 1421860_at   | -0.053999681 | 8.266072676 | -0.53488933  | 0.605141359 | 0.605141359 | -5.49582491  |
| 1452521_a_at | -0.047412686 | 6.68081744  | -0.534827865 | 0.605182223 | 0.605182223 | -5.495855651 |
| 1418659_at   | 0.042449554  | 7.631119618 | 0.53482328   | 0.605185271 | 0.605185271 | -5.495857944 |
| 1442083_at   | -0.069025075 | 8.588803529 | -0.534819398 | 0.605187852 | 0.605187852 | -5.495859886 |
| 1416572_at   | 0.041203255  | 9.460512334 | 0.534807027  | 0.605196077 | 0.605196077 | -5.495866072 |
| 1453706_at   | -0.046880492 | 5.627993714 | -0.534794209 | 0.6052046   | 0.6052046   | -5.495872483 |
| 1422736_at   | -0.038159649 | 8.60382118  | -0.534744902 | 0.605237382 | 0.605237382 | -5.495897139 |
| 1418007_at   | 0.047704444  | 10.11956467 | 0.534727873  | 0.605248705 | 0.605248705 | -5.495905654 |
| 1421166_at   | 0.059110429  | 5.742100065 | 0.53471872   | 0.605254791 | 0.605254791 | -5.495910231 |
| 1446893_at   | 0.043126923  | 5.317538153 | 0.534717735  | 0.605255445 | 0.605255445 | -5.495910724 |
| 1436425_at   | -0.05172446  | 7.547173694 | -0.534708228 | 0.605261766 | 0.605261766 | -5.495915477 |



|              |              |             |              |             |             |              |
|--------------|--------------|-------------|--------------|-------------|-------------|--------------|
| 1416224_at   | -0.041937154 | 7.749582296 | -0.534597573 | 0.605335342 | 0.605335342 | -5.4959708   |
| 1429802_at   | 0.060377771  | 4.835973545 | 0.534565741  | 0.605356509 | 0.605356509 | -5.495986713 |
| 1452337_at   | -0.049361832 | 6.281681932 | -0.534556762 | 0.605362479 | 0.605362479 | -5.495991201 |
| 1426647_at   | 0.049475358  | 5.395079862 | 0.534512021  | 0.605392231 | 0.605392231 | -5.496013566 |
| 1459608_at   | -0.035498595 | 5.633419708 | -0.534504885 | 0.605396976 | 0.605396976 | -5.496017133 |
| 1446045_at   | 0.053364984  | 3.472961348 | 0.534483679  | 0.605411077 | 0.605411077 | -5.496027732 |
| 1457014_x_at | 0.042034996  | 3.525884493 | 0.534477232  | 0.605415364 | 0.605415364 | -5.496030954 |
| 1435277_x_at | -0.037277846 | 10.71052162 | -0.534474649 | 0.605417082 | 0.605417082 | -5.496032245 |
| 1445387_at   | -0.044673654 | 7.9902924   | -0.53445178  | 0.60543229  | 0.60543229  | -5.496043675 |
| 1427523_at   | 0.067898026  | 6.628296911 | 0.534389551  | 0.605473672 | 0.605473672 | -5.496074774 |
| 1455765_a_at | 0.03509731   | 4.844871732 | 0.534351813  | 0.605498769 | 0.605498769 | -5.496093632 |
| 1431343_at   | -0.055385713 | 4.919313769 | -0.534341324 | 0.605505744 | 0.605505744 | -5.496098873 |
| 1423073_at   | 0.03357569   | 10.92006431 | 0.53429226   | 0.605538374 | 0.605538374 | -5.496123389 |
| 1438725_at   | -0.040537672 | 6.994084243 | -0.534181087 | 0.605612313 | 0.605612313 | -5.496178931 |
| 1440084_at   | -0.047008324 | 7.446984081 | -0.534150048 | 0.605632957 | 0.605632957 | -5.496194436 |
| 1445383_at   | 0.048177705  | 3.884142965 | 0.534117088  | 0.605654879 | 0.605654879 | -5.4962109   |
| 1441646_at   | 0.038569566  | 4.685824749 | 0.534038339  | 0.605707258 | 0.605707258 | -5.496250232 |
| 1420450_at   | -0.066269887 | 5.287302031 | -0.533972256 | 0.605751213 | 0.605751213 | -5.496283233 |
| 1441423_at   | 0.133804133  | 5.118468261 | 0.533834912  | 0.605842575 | 0.605842575 | -5.49635181  |
| 1428272_at   | 0.060874052  | 10.08157788 | 0.53381903   | 0.60585314  | 0.60585314  | -5.496359739 |
| 1452718_at   | -0.034372957 | 10.66276262 | -0.533735264 | 0.605908865 | 0.605908865 | -5.496401554 |
| 1430695_at   | -0.04739712  | 3.410109233 | -0.533676427 | 0.605948008 | 0.605948008 | -5.496430922 |
| 1417072_at   | -0.04581417  | 5.15838596  | -0.533655592 | 0.60596187  | 0.60596187  | -5.496441321 |
| 1443448_x_at | 0.041031322  | 3.960552075 | 0.533518387  | 0.606053155 | 0.606053155 | -5.49650979  |
| 1434004_at   | -0.03840768  | 7.686913478 | -0.533513257 | 0.606056569 | 0.606056569 | -5.49651235  |
| 1440055_at   | 0.047140461  | 7.996132613 | 0.533460614  | 0.606091595 | 0.606091595 | -5.496538616 |
| 1434148_at   | -0.045821458 | 10.47123451 | -0.533441198 | 0.606104514 | 0.606104514 | -5.496548303 |
| 1420442_at   | -0.07164573  | 4.85202653  | -0.533434913 | 0.606108696 | 0.606108696 | -5.496551438 |
| 1447752_x_at | -0.045829541 | 5.080522791 | -0.53341538  | 0.606121693 | 0.606121693 | -5.496561183 |
| 1449387_at   | -0.044818603 | 3.886260696 | -0.533410258 | 0.606125101 | 0.606125101 | -5.496563738 |
| 1439271_x_at | -0.043723202 | 10.25515079 | -0.533374004 | 0.606149224 | 0.606149224 | -5.496581824 |
| 1460340_at   | -0.041650024 | 4.186394191 | -0.533346258 | 0.606167686 | 0.606167686 | -5.496595664 |
| 1440338_at   | 0.037364371  | 5.229396291 | 0.533342898  | 0.606169922 | 0.606169922 | -5.49659734  |
| 1423419_at   | -0.037353775 | 8.499169539 | -0.533289505 | 0.606205452 | 0.606205452 | -5.496623972 |
| 1435853_at   | -0.034400147 | 3.430710598 | -0.533188895 | 0.606272403 | 0.606272403 | -5.496674149 |
| 1436244_a_at | 0.065306815  | 8.333797354 | 0.533114777  | 0.606321727 | 0.606321727 | -5.496711108 |
| 1433560_at   | -0.052648077 | 6.175255781 | -0.533083728 | 0.60634239  | 0.60634239  | -5.496726589 |
| 1454878_at   | 0.051776755  | 8.811492118 | 0.533049315  | 0.606365293 | 0.606365293 | -5.496743746 |
| 1453326_at   | -0.05075266  | 5.699421597 | -0.533044336 | 0.606368607 | 0.606368607 | -5.496746229 |
| 1449443_at   | -0.050937287 | 6.574879547 | -0.53303109  | 0.606377422 | 0.606377422 | -5.496752833 |
| 1432234_at   | 0.06397713   | 4.319570604 | 0.532985844  | 0.606407536 | 0.606407536 | -5.496775389 |
| 1421204_a_at | 0.037003678  | 6.350133743 | 0.53297842   | 0.606412477 | 0.606412477 | -5.49677909  |
| 1431712_a_at | -0.06796539  | 6.123536351 | -0.532954144 | 0.606428634 | 0.606428634 | -5.496791191 |
| 1432402_at   | 0.046185331  | 4.432846284 | 0.53294756   | 0.606433016 | 0.606433016 | -5.496794473 |
| 1438119_at   | -0.042970018 | 3.15171798  | -0.532890533 | 0.606470972 | 0.606470972 | -5.496822898 |
| 1434810_a_at | 0.044800099  | 3.17652508  | 0.532887579  | 0.606472938 | 0.606472938 | -5.49682437  |
| 1421722_at   | 0.046743221  | 3.321047468 | 0.532871576  | 0.606483589 | 0.606483589 | -5.496832347 |
| 1435355_at   | -0.252597211 | 6.807788228 | -0.532810532 | 0.60652422  | 0.60652422  | -5.496862769 |
| 1444790_at   | -0.040235956 | 3.785514289 | -0.532781969 | 0.606543233 | 0.606543233 | -5.496877003 |
| 1444887_at   | -0.037631233 | 4.267618578 | -0.53268649  | 0.606606788 | 0.606606788 | -5.496924579 |
| 1431568_at   | -0.035539146 | 3.443272171 | -0.532675603 | 0.606614035 | 0.606614035 | -5.496930004 |
| 1436986_at   | 0.087200477  | 4.353500676 | 0.532631099  | 0.606643661 | 0.606643661 | -5.496952176 |
| 1418704_at   | 0.054849143  | 7.32076873  | 0.532603472  | 0.606662051 | 0.606662051 | -5.496965939 |

|              |              |             |              |             |             |              |
|--------------|--------------|-------------|--------------|-------------|-------------|--------------|
| 1437985_a_at | 0.061680355  | 8.438101033 | 0.5325909    | 0.606670421 | 0.606670421 | -5.496972202 |
| 1452572_at   | -0.049501799 | 4.444769357 | -0.532583078 | 0.606675628 | 0.606675628 | -5.496976099 |
| 1445023_at   | -0.044754317 | 3.196798899 | -0.53255037  | 0.606697402 | 0.606697402 | -5.496992392 |
| 1444610_at   | -0.040863039 | 3.410082913 | -0.532548921 | 0.606698366 | 0.606698366 | -5.496993114 |
| 1436072_at   | 0.062050991  | 6.723377059 | 0.532507447  | 0.606725977 | 0.606725977 | -5.497013772 |
| 1455556_at   | -0.062762688 | 9.401060489 | -0.532498322 | 0.606732052 | 0.606732052 | -5.497018317 |
| 1445231_at   | -0.037126069 | 5.591948116 | -0.532497557 | 0.606732561 | 0.606732561 | -5.497018698 |
| 1424522_at   | 0.033205464  | 8.752412976 | 0.532484146  | 0.60674149  | 0.60674149  | -5.497025378 |
| 1427793_at   | -0.041749599 | 3.857880154 | -0.532476911 | 0.606746306 | 0.606746306 | -5.497028981 |
| 1418154_at   | 0.038877822  | 8.996724794 | 0.532470064  | 0.606750865 | 0.606750865 | -5.497032392 |
| 1440277_at   | -0.042976269 | 7.983408318 | -0.532418213 | 0.606785385 | 0.606785385 | -5.497058215 |
| 1437761_at   | 0.037349777  | 9.759092938 | 0.532377474  | 0.606812507 | 0.606812507 | -5.497078502 |
| 1457442_at   | 0.045030726  | 4.35938033  | 0.532243345  | 0.606901812 | 0.606901812 | -5.497145288 |
| 1450948_a_at | -0.046831537 | 6.736146002 | -0.532225728 | 0.606913542 | 0.606913542 | -5.497154058 |
| 1456968_at   | -0.084458374 | 4.233935117 | -0.532209981 | 0.606924027 | 0.606924027 | -5.497161898 |
| 1442489_at   | -0.114476328 | 6.679683578 | -0.532208253 | 0.606925178 | 0.606925178 | -5.497162758 |
| 1459087_at   | -0.063485101 | 5.428357081 | -0.532202586 | 0.606928951 | 0.606928951 | -5.497165579 |
| 1448501_at   | -0.039014186 | 10.42015835 | -0.53220173  | 0.60692952  | 0.60692952  | -5.497166005 |
| 1419063_at   | 0.108681025  | 4.049357224 | 0.532170843  | 0.606950087 | 0.606950087 | -5.497181381 |
| 1422577_at   | 0.039556311  | 9.956989274 | 0.532134046  | 0.606974589 | 0.606974589 | -5.497199697 |
| 1451918_a_at | 0.04663889   | 7.799576807 | 0.532116652  | 0.606986171 | 0.606986171 | -5.497208355 |
| 1416466_at   | 0.037106402  | 11.29842053 | 0.53206247   | 0.60702225  | 0.60702225  | -5.497235323 |
| 1448876_at   | -0.063054451 | 8.127232499 | -0.531994934 | 0.607067224 | 0.607067224 | -5.497268934 |
| 1458226_at   | 0.046009379  | 5.881757542 | 0.531921193  | 0.607116331 | 0.607116331 | -5.497305628 |
| 1455217_at   | 0.052835353  | 7.652832013 | 0.531825315  | 0.607180184 | 0.607180184 | -5.49735333  |
| 1449438_at   | 0.043025776  | 8.79424893  | 0.531800631  | 0.607196623 | 0.607196623 | -5.49736561  |
| 1433621_at   | -0.040581588 | 7.469746017 | -0.531765217 | 0.607220209 | 0.607220209 | -5.497383227 |
| 1422979_at   | 0.05095847   | 6.021051779 | 0.531754664  | 0.607227238 | 0.607227238 | -5.497388476 |
| 1416607_at   | 0.041572614  | 9.190476565 | 0.53172633   | 0.607246108 | 0.607246108 | -5.49740257  |
| 1431497_at   | 0.038151361  | 5.559883737 | 0.531716642  | 0.607252561 | 0.607252561 | -5.497407389 |
| 1428062_at   | -0.069206458 | 4.766194346 | -0.531716375 | 0.607252739 | 0.607252739 | -5.497407522 |
| 1437379_x_at | 0.05710765   | 7.384730252 | 0.531696291  | 0.607266116 | 0.607266116 | -5.497417511 |
| 1455261_at   | 0.037404691  | 8.476320124 | 0.531528125  | 0.607378127 | 0.607378127 | -5.497501141 |
| 1453776_at   | -0.056509644 | 5.903925197 | -0.531446596 | 0.607432435 | 0.607432435 | -5.497541677 |
| 1454550_at   | -0.032124189 | 4.237241579 | -0.531415324 | 0.607453267 | 0.607453267 | -5.497557223 |
| 1448359_a_at | 0.063563632  | 5.298012227 | 0.531366384  | 0.607485868 | 0.607485868 | -5.497581552 |
| 1452649_at   | 0.039729302  | 12.0955923  | 0.531289759  | 0.607536915 | 0.607536915 | -5.497619639 |
| 1447986_at   | -0.033016821 | 4.712257166 | -0.531265161 | 0.607553302 | 0.607553302 | -5.497631864 |
| 1429711_at   | 0.034438416  | 8.676249407 | 0.531110489  | 0.60765635  | 0.60765635  | -5.497708726 |
| 1441748_at   | 0.040760831  | 5.146090873 | 0.531091228  | 0.607669182 | 0.607669182 | -5.497718296 |
| 1460705_at   | -0.04053547  | 9.665498221 | -0.531055866 | 0.607692744 | 0.607692744 | -5.497735865 |
| 1423925_at   | 0.041511179  | 8.842662595 | 0.530973017  | 0.607747946 | 0.607747946 | -5.497777023 |
| 1456846_at   | 0.042885872  | 6.728780931 | 0.530959204  | 0.60775715  | 0.60775715  | -5.497783885 |
| 1434401_at   | -0.037597656 | 7.663605082 | -0.53092115  | 0.607782507 | 0.607782507 | -5.497802787 |
| 1446726_at   | -0.036236909 | 3.563975564 | -0.530919081 | 0.607783885 | 0.607783885 | -5.497803814 |
| 1451178_at   | -0.040957608 | 9.785445119 | -0.530915122 | 0.607786523 | 0.607786523 | -5.497805781 |
| 1436789_at   | 0.072013362  | 6.119798026 | 0.530903627  | 0.607794183 | 0.607794183 | -5.49781149  |
| 1458087_at   | -0.071336092 | 6.618130733 | -0.53089913  | 0.607797179 | 0.607797179 | -5.497813724 |
| 1424919_at   | 0.047677685  | 8.368274333 | 0.53087411   | 0.607813851 | 0.607813851 | -5.49782615  |
| 1423387_at   | -0.032826715 | 5.77943769  | -0.530872734 | 0.607814769 | 0.607814769 | -5.497826834 |
| 1454848_at   | 0.066412076  | 7.191878137 | 0.530754309  | 0.607893684 | 0.607893684 | -5.497885645 |
| 1428869_at   | -0.040647804 | 9.310041734 | -0.530730221 | 0.607909736 | 0.607909736 | -5.497897605 |
| 1433889_at   | -0.042609172 | 3.909806354 | -0.53072669  | 0.607912089 | 0.607912089 | -5.497899359 |

|              |              |             |              |             |             |              |
|--------------|--------------|-------------|--------------|-------------|-------------|--------------|
| 1459478_at   | -0.045566494 | 3.350548002 | -0.530618431 | 0.607984237 | 0.607984237 | -5.497953107 |
| 1452838_at   | -0.034654536 | 7.783354879 | -0.530601025 | 0.607995837 | 0.607995837 | -5.497961748 |
| 1460606_at   | -0.048182816 | 3.109742843 | -0.530512364 | 0.608054928 | 0.608054928 | -5.498005758 |
| 1434818_at   | 0.046435682  | 4.76305869  | 0.530453393  | 0.608094232 | 0.608094232 | -5.498035026 |
| 1455528_at   | -0.059355595 | 4.493270329 | -0.530439786 | 0.608103301 | 0.608103301 | -5.498041779 |
| 1450838_x_at | 0.032144143  | 7.05169084  | 0.530418977  | 0.60811717  | 0.60811717  | -5.498052106 |
| 1453197_at   | 0.032510638  | 8.683187066 | 0.530413723  | 0.608120673 | 0.608120673 | -5.498054713 |
| 1423982_at   | -0.047412314 | 9.569279863 | -0.530352811 | 0.608161273 | 0.608161273 | -5.49808494  |
| 1444031_at   | 0.090166062  | 4.060017727 | 0.530351683  | 0.608162025 | 0.608162025 | -5.4980855   |
| 1423374_at   | -0.042283263 | 8.73879245  | -0.530306776 | 0.608191958 | 0.608191958 | -5.498107782 |
| 1446338_at   | -0.045201236 | 5.790043973 | -0.530299864 | 0.608196565 | 0.608196565 | -5.498111211 |
| 1442493_at   | -0.052891303 | 4.17064205  | -0.530295901 | 0.608199207 | 0.608199207 | -5.498113178 |
| 1455304_at   | 0.098150684  | 4.502350454 | 0.53022728   | 0.608244949 | 0.608244949 | -5.498147222 |
| 1433535_x_at | 0.039155182  | 11.82421562 | 0.530212914  | 0.608254526 | 0.608254526 | -5.498154349 |
| 1427515_at   | -0.069249918 | 4.164061805 | -0.530203524 | 0.608260785 | 0.608260785 | -5.498159007 |
| 1439842_at   | 0.033463725  | 3.480446869 | 0.530050537  | 0.608362772 | 0.608362772 | -5.49823489  |
| 1441473_at   | 0.042789389  | 4.010723106 | 0.530012432  | 0.608388176 | 0.608388176 | -5.498253787 |
| 1415914_at   | 0.033747826  | 12.32494561 | 0.529775401  | 0.608546211 | 0.608546211 | -5.498371307 |
| 1438299_at   | -0.054421706 | 8.860628809 | -0.529710661 | 0.608589378 | 0.608589378 | -5.498403397 |
| 1440764_at   | 0.058989833  | 8.041635704 | 0.529640982  | 0.60863584  | 0.60863584  | -5.498437931 |
| 1450195_at   | -0.052098017 | 4.096191148 | -0.529554605 | 0.60869344  | 0.60869344  | -5.498480734 |
| 1418346_at   | -0.077000772 | 5.545672582 | -0.529517939 | 0.608717892 | 0.608717892 | -5.498498902 |
| 1453815_at   | 0.052409052  | 5.531142966 | 0.529511259  | 0.608722346 | 0.608722346 | -5.498502212 |
| 1439479_at   | -0.043234963 | 3.728330154 | -0.529389824 | 0.608803331 | 0.608803331 | -5.498562373 |
| 1433879_a_at | -0.034730143 | 10.13563303 | -0.529378415 | 0.608810939 | 0.608810939 | -5.498568024 |
| 1459319_at   | -0.041359945 | 3.930858662 | -0.529344518 | 0.608833547 | 0.608833547 | -5.498584815 |
| 1447746_at   | -0.054864941 | 3.526100487 | -0.529328654 | 0.608844127 | 0.608844127 | -5.498592672 |
| 1447046_at   | -0.044077226 | 4.88469199  | -0.529292555 | 0.608868203 | 0.608868203 | -5.498610552 |
| 1458887_at   | -0.057916578 | 4.063620211 | -0.529250959 | 0.608895946 | 0.608895946 | -5.498631152 |
| 1449718_s_at | 0.045608718  | 6.314149005 | 0.529242375  | 0.608901671 | 0.608901671 | -5.498635403 |
| 1429605_at   | 0.036388178  | 3.367665904 | 0.529180733  | 0.608942785 | 0.608942785 | -5.498665929 |
| 1445712_at   | -0.0436482   | 4.47164522  | -0.529157687 | 0.608958157 | 0.608958157 | -5.498677341 |
| 1447086_at   | 0.0436164    | 5.884784559 | 0.529114823  | 0.608986748 | 0.608986748 | -5.498698564 |
| 1416669_s_at | 0.036618996  | 12.77313675 | 0.528998264  | 0.609064498 | 0.609064498 | -5.498756269 |
| 1418631_at   | -0.033757374 | 8.899487803 | -0.528940325 | 0.609103148 | 0.609103148 | -5.498784949 |
| 1460582_x_at | 0.053652927  | 5.05200738  | 0.528803832  | 0.609194204 | 0.609194204 | -5.4988525   |
| 1428056_at   | 0.038858448  | 3.13668392  | 0.528788785  | 0.609204243 | 0.609204243 | -5.498859946 |
| 1420815_at   | 0.035997867  | 11.48681369 | 0.52876204   | 0.609222086 | 0.609222086 | -5.498873181 |
| 1455212_at   | -0.034685863 | 7.368024416 | -0.528733994 | 0.609240797 | 0.609240797 | -5.498887057 |
| 1453592_at   | -0.038046913 | 3.32719709  | -0.528650557 | 0.609296465 | 0.609296465 | -5.498928338 |
| 1431299_a_at | 0.040847465  | 7.87080601  | 0.528611166  | 0.609322747 | 0.609322747 | -5.498947825 |
| 1433199_at   | 0.041477539  | 3.476580459 | 0.5285841    | 0.609340806 | 0.609340806 | -5.498961214 |
| 1460387_a_at | -0.043085973 | 7.697661344 | -0.52853399  | 0.609374241 | 0.609374241 | -5.498986    |
| 1427821_at   | 0.04727265   | 4.047352632 | 0.528514018  | 0.609387567 | 0.609387567 | -5.498995878 |
| 1421776_at   | -0.036781907 | 3.427662117 | -0.528469422 | 0.609417324 | 0.609417324 | -5.499017934 |
| 1443567_at   | -0.034715342 | 3.466409007 | -0.528424032 | 0.609447611 | 0.609447611 | -5.499040381 |
| 1449261_at   | -0.060035234 | 8.052222908 | -0.528371932 | 0.609482377 | 0.609482377 | -5.499066144 |
| 1422760_at   | -0.065322363 | 3.635364922 | -0.528356735 | 0.609492519 | 0.609492519 | -5.499073659 |
| 1432549_s_at | 0.0737634    | 4.499735736 | 0.528276602  | 0.609545993 | 0.609545993 | -5.499113278 |
| 1457078_at   | 0.05498015   | 4.800003503 | 0.528269379  | 0.609550814 | 0.609550814 | -5.499116849 |
| 1452496_at   | -0.050085713 | 6.968142786 | -0.528266375 | 0.609552819 | 0.609552819 | -5.499118335 |
| 1455417_at   | -0.04606304  | 6.980002509 | -0.528168244 | 0.609618308 | 0.609618308 | -5.499166844 |
| 1419626_at   | -0.03810097  | 3.147309784 | -0.528139934 | 0.609637201 | 0.609637201 | -5.499180837 |

|              |              |             |              |             |             |              |
|--------------|--------------|-------------|--------------|-------------|-------------|--------------|
| 1428125_at   | -0.047116411 | 10.75321044 | -0.528137811 | 0.609638618 | 0.609638618 | -5.499181887 |
| 1454829_at   | -0.038944626 | 7.598699429 | -0.528133683 | 0.609641373 | 0.609641373 | -5.499183927 |
| 1454306_at   | 0.05490575   | 5.26870423  | 0.528107239  | 0.609659022 | 0.609659022 | -5.499196997 |
| 1456855_at   | -0.038219521 | 7.217213443 | -0.528104829 | 0.60966063  | 0.60966063  | -5.499198188 |
| 1456967_at   | -0.036860307 | 3.529589662 | -0.528092305 | 0.609668989 | 0.609668989 | -5.499204378 |
| 1448142_x_at | 0.03382458   | 12.9892755  | 0.528082543  | 0.609675504 | 0.609675504 | -5.499209202 |
| 1427661_a_at | -0.035529298 | 8.637360894 | -0.528075634 | 0.609680115 | 0.609680115 | -5.499212617 |
| 1429235_at   | 0.051047674  | 4.465800243 | 0.528039518  | 0.60970422  | 0.60970422  | -5.499230465 |
| 1422733_at   | 0.068932953  | 6.507071441 | 0.528026752  | 0.60971274  | 0.60971274  | -5.499236774 |
| 1446741_at   | -0.054237396 | 4.299470414 | -0.527974048 | 0.609747917 | 0.609747917 | -5.499262817 |
| 1438839_a_at | -0.052699753 | 12.77892125 | -0.527953831 | 0.609761411 | 0.609761411 | -5.499272807 |
| 1448559_at   | 0.041893392  | 8.133484814 | 0.527928378  | 0.6097784   | 0.6097784   | -5.499285383 |
| 1445343_at   | 0.05595582   | 4.421767987 | 0.527927667  | 0.609778875 | 0.609778875 | -5.499285734 |
| 1416977_at   | 0.043989726  | 5.385653289 | 0.527861199  | 0.609823241 | 0.609823241 | -5.499318573 |
| 1432310_at   | 0.041296449  | 3.746970162 | 0.52783501   | 0.609840722 | 0.609840722 | -5.499331511 |
| 1444589_at   | 0.071285643  | 4.795513186 | 0.527794418  | 0.609867818 | 0.609867818 | -5.499351562 |
| 1433840_a_at | -0.038822519 | 7.603437202 | -0.527678113 | 0.609945457 | 0.609945457 | -5.499409007 |
| 1442240_at   | -0.043833545 | 6.730658807 | -0.527656134 | 0.609960129 | 0.609960129 | -5.499419862 |
| 1445508_at   | -0.044385047 | 3.424867287 | -0.527645539 | 0.609967202 | 0.609967202 | -5.499425094 |
| 1429602_at   | -0.041806494 | 4.803456438 | -0.527631351 | 0.609976674 | 0.609976674 | -5.4994321   |
| 1423946_at   | 0.034695789  | 7.433357126 | 0.527566143  | 0.610020207 | 0.610020207 | -5.4994643   |
| 1434608_at   | 0.045153017  | 8.004976258 | 0.527470289  | 0.610084202 | 0.610084202 | -5.499511626 |
| 1421037_at   | -0.052686621 | 4.214034317 | -0.527443993 | 0.610101758 | 0.610101758 | -5.499524607 |
| 1437863_at   | 0.038705102  | 3.893512758 | 0.527439969  | 0.610104445 | 0.610104445 | -5.499526594 |
| 1456326_at   | -0.049969176 | 8.419653275 | -0.527415711 | 0.610120641 | 0.610120641 | -5.499538568 |
| 1447846_x_at | -0.043483816 | 5.040093536 | -0.527362827 | 0.61015595  | 0.61015595  | -5.499564672 |
| 1417837_at   | 0.037330531  | 6.036185112 | 0.527357201  | 0.610159707 | 0.610159707 | -5.499567449 |
| 1459559_at   | -0.044870261 | 3.2929648   | -0.527303496 | 0.610195565 | 0.610195565 | -5.499593956 |
| 1420155_at   | 0.052799203  | 3.780436572 | 0.527295223  | 0.610201089 | 0.610201089 | -5.499598039 |
| 1430891_at   | 0.051252283  | 5.160784651 | 0.527235293  | 0.610241106 | 0.610241106 | -5.499627615 |
| 1418097_a_at | 0.048167495  | 7.395630301 | 0.527228554  | 0.610245606 | 0.610245606 | -5.49963094  |
| 1439441_x_at | -0.058643466 | 6.976466374 | -0.527143961 | 0.610302093 | 0.610302093 | -5.499672681 |
| 1439657_at   | 0.046071071  | 5.196571318 | 0.527066209  | 0.610354014 | 0.610354014 | -5.499711041 |
| 1422016_a_at | 0.05550364   | 7.653585825 | 0.527059244  | 0.610358666 | 0.610358666 | -5.499714477 |
| 1422013_at   | 0.07482346   | 5.672678514 | 0.527058801  | 0.610358962 | 0.610358962 | -5.499714696 |
| 1457432_at   | 0.050730435  | 4.040912186 | 0.527024847  | 0.610381636 | 0.610381636 | -5.499731446 |
| 1440396_at   | 0.091263575  | 4.675053356 | 0.527014857  | 0.610388308 | 0.610388308 | -5.499736374 |
| 1458527_at   | 0.061647557  | 6.420964668 | 0.527004108  | 0.610395486 | 0.610395486 | -5.499741676 |
| 1430224_at   | -0.057225494 | 4.955335486 | -0.52695696  | 0.610426973 | 0.610426973 | -5.499764932 |
| 1419097_a_at | -0.040288203 | 7.717990819 | -0.52691421  | 0.610455524 | 0.610455524 | -5.499786017 |
| 1436170_a_at | -0.040736156 | 3.927969631 | -0.526798045 | 0.610533108 | 0.610533108 | -5.499843303 |
| 1428055_at   | 0.102865054  | 8.887699353 | 0.526790799  | 0.610537947 | 0.610537947 | -5.499846876 |
| 1452884_at   | 0.038317642  | 9.203485253 | 0.526689812  | 0.610605399 | 0.610605399 | -5.499896667 |
| 1459686_at   | 0.045660267  | 4.464268452 | 0.526675225  | 0.610615142 | 0.610615142 | -5.499903858 |
| 1417158_at   | 0.077483042  | 6.200096415 | 0.526661414  | 0.610624367 | 0.610624367 | -5.499910666 |
| 1438548_x_at | -0.038175531 | 7.769215582 | -0.526659089 | 0.61062592  | 0.61062592  | -5.499911813 |
| 1430089_at   | -0.053092762 | 8.759193041 | -0.52663868  | 0.610639552 | 0.610639552 | -5.499921873 |
| 1458749_at   | -0.035010707 | 4.544039174 | -0.526617892 | 0.610653438 | 0.610653438 | -5.499932121 |
| 1444914_at   | 0.048483594  | 5.169616829 | 0.526564233  | 0.610689281 | 0.610689281 | -5.49995857  |
| 1446868_at   | 0.074441872  | 6.050069544 | 0.526559439  | 0.610692483 | 0.610692483 | -5.499960933 |
| 1454047_a_at | 0.043429677  | 7.416033806 | 0.52646259   | 0.610757179 | 0.610757179 | -5.500008664 |
| 1432262_at   | 0.03770762   | 6.482308318 | 0.526426552  | 0.610781254 | 0.610781254 | -5.500026423 |
| 1429426_at   | -0.043337625 | 4.966570801 | -0.526419263 | 0.610786123 | 0.610786123 | -5.500030015 |

|              |              |             |              |             |             |              |
|--------------|--------------|-------------|--------------|-------------|-------------|--------------|
| 1451840_at   | -0.041871057 | 4.217974052 | -0.526391065 | 0.610804961 | 0.610804961 | -5.50004391  |
| 1451881_at   | -0.043945193 | 4.369645745 | -0.526383226 | 0.610810198 | 0.610810198 | -5.500047772 |
| 1459164_at   | -0.035927145 | 3.5173054   | -0.52637124  | 0.610818205 | 0.610818205 | -5.500053678 |
| 1436751_at   | 0.046434082  | 3.412215808 | 0.526347763  | 0.610833889 | 0.610833889 | -5.500065245 |
| 1438117_x_at | 0.042015158  | 9.116307719 | 0.526330799  | 0.610845222 | 0.610845222 | -5.500073603 |
| 1435252_at   | 0.115428536  | 3.629756061 | 0.526321575  | 0.610851384 | 0.610851384 | -5.500078148 |
| 1423307_s_at | 0.03814619   | 7.079792403 | 0.526310758  | 0.610858611 | 0.610858611 | -5.500083477 |
| 1446846_at   | -0.056662172 | 5.969308225 | -0.526286956 | 0.610874513 | 0.610874513 | -5.500095203 |
| 1420607_at   | 0.041019476  | 8.813010351 | 0.526245234  | 0.610902388 | 0.610902388 | -5.500115757 |
| 1420488_at   | -0.043104096 | 7.463494589 | -0.526239705 | 0.610906082 | 0.610906082 | -5.500118481 |
| 1448493_at   | 0.034573205  | 11.41077493 | 0.526228199  | 0.610913769 | 0.610913769 | -5.500124148 |
| 1429567_at   | 0.037615263  | 5.643980531 | 0.526224305  | 0.610916371 | 0.610916371 | -5.500126066 |
| 1445439_at   | 0.031874829  | 5.908473689 | 0.526181079  | 0.610945251 | 0.610945251 | -5.500147358 |
| 1416704_at   | -0.054495344 | 7.7772269   | -0.526128471 | 0.610980401 | 0.610980401 | -5.50017327  |
| 1424418_at   | 0.039765718  | 7.824411407 | 0.526107102  | 0.610994678 | 0.610994678 | -5.500183794 |
| 1451264_at   | 0.044396876  | 9.996928162 | 0.52602189   | 0.611051615 | 0.611051615 | -5.500225756 |
| 1439675_at   | 0.053196478  | 4.929426119 | 0.52601813   | 0.611054128 | 0.611054128 | -5.500227608 |
| 1444283_at   | -0.054268424 | 3.83586877  | -0.525992198 | 0.611071456 | 0.611071456 | -5.500240377 |
| 1432203_at   | -0.045628171 | 3.488776988 | -0.525976238 | 0.61108212  | 0.61108212  | -5.500248235 |
| 1418228_at   | -0.038471733 | 9.711124092 | -0.525882999 | 0.611144425 | 0.611144425 | -5.50029414  |
| 1435574_at   | 0.073694028  | 6.316339386 | 0.525881586  | 0.611145369 | 0.611145369 | -5.500294836 |
| 1439444_x_at | -0.092059818 | 8.185149456 | -0.525806557 | 0.611195508 | 0.611195508 | -5.500331769 |
| 1424571_at   | 0.035569885  | 7.589921327 | 0.525794951  | 0.611203264 | 0.611203264 | -5.500337482 |
| 1430822_at   | -0.052239088 | 3.966860737 | -0.525729569 | 0.611246958 | 0.611246958 | -5.500369662 |
| 1426486_at   | 0.040295512  | 9.82171018  | 0.525656247  | 0.611295961 | 0.611295961 | -5.500405746 |
| 1423867_at   | -0.033482332 | 3.378769173 | -0.525619102 | 0.611320786 | 0.611320786 | -5.500424024 |
| 1446583_at   | 0.041728332  | 5.121289263 | 0.525600443  | 0.611333256 | 0.611333256 | -5.500433205 |
| 1428172_at   | 0.053061664  | 8.899882407 | 0.525592742  | 0.611338404 | 0.611338404 | -5.500436994 |
| 1418647_at   | 0.033534713  | 5.639744758 | 0.525537202  | 0.611375524 | 0.611375524 | -5.500464321 |
| 1432212_at   | -0.038784112 | 4.247274051 | -0.525527425 | 0.611382059 | 0.611382059 | -5.500469131 |
| 1432329_a_at | 0.049411678  | 5.002600399 | 0.52546774   | 0.611421952 | 0.611421952 | -5.500498493 |
| 1428929_s_at | -0.033907391 | 6.890724169 | -0.52540558  | 0.611463501 | 0.611463501 | -5.50052907  |
| 1427208_at   | -0.032919298 | 8.762325508 | -0.525404537 | 0.611464198 | 0.611464198 | -5.500529583 |
| 1443156_at   | -0.037995276 | 7.304979515 | -0.525392329 | 0.611472358 | 0.611472358 | -5.500535588 |
| 1417404_at   | 0.034046377  | 10.09125561 | 0.525387411  | 0.611475646 | 0.611475646 | -5.500538007 |
| 1418867_at   | 0.043585402  | 4.547119184 | 0.525384064  | 0.611477883 | 0.611477883 | -5.500539653 |
| 1460077_at   | -0.041310236 | 8.2193365   | -0.525330247 | 0.611513856 | 0.611513856 | -5.500566122 |
| 1458970_at   | 0.048054377  | 4.108080718 | 0.525262651  | 0.611559042 | 0.611559042 | -5.500599364 |
| 1433563_s_at | 0.042984958  | 8.242211046 | 0.525245424  | 0.611570558 | 0.611570558 | -5.500607836 |
| 1445035_at   | -0.049452928 | 3.711739242 | -0.525181618 | 0.611613212 | 0.611613212 | -5.500639209 |
| 1417738_at   | -0.069597553 | 7.37120847  | -0.525069151 | 0.6116884   | 0.6116884   | -5.500694501 |
| 1435455_at   | -0.036353974 | 7.266409933 | -0.525056289 | 0.611696999 | 0.611696999 | -5.500700824 |
| 1437975_a_at | -0.036740948 | 13.6314654  | -0.524992529 | 0.611739627 | 0.611739627 | -5.500732165 |
| 1420266_at   | -0.04876031  | 6.477866681 | -0.524977594 | 0.611749612 | 0.611749612 | -5.500739505 |
| 1427158_at   | 0.034493436  | 8.718127136 | 0.524971971  | 0.611753372 | 0.611753372 | -5.500742269 |
| 1455311_at   | -0.043975615 | 8.949602977 | -0.52494854  | 0.611769038 | 0.611769038 | -5.500753785 |
| 1441302_at   | -0.04529128  | 3.4603187   | -0.524944219 | 0.611771926 | 0.611771926 | -5.500755908 |
| 1459945_at   | 0.048403145  | 3.259624861 | 0.524896     | 0.611804166 | 0.611804166 | -5.500779606 |
| 1447791_s_at | 0.087403586  | 3.840593786 | 0.524895804  | 0.611804297 | 0.611804297 | -5.500779702 |
| 1434207_at   | 0.03963141   | 7.546562335 | 0.524894049  | 0.611805471 | 0.611805471 | -5.500780565 |
| 1446484_at   | -0.176131856 | 7.823606491 | -0.524829617 | 0.611848552 | 0.611848552 | -5.500812227 |
| 1439818_at   | 0.084473365  | 4.498643795 | 0.524824302  | 0.611852106 | 0.611852106 | -5.500814838 |
| 1433522_at   | -0.057871876 | 8.249438092 | -0.524790898 | 0.611874441 | 0.611874441 | -5.500831251 |

|              |              |             |              |             |             |              |
|--------------|--------------|-------------|--------------|-------------|-------------|--------------|
| 1450345_at   | -0.037025293 | 4.822873295 | -0.52477101  | 0.61188774  | 0.61188774  | -5.500841023 |
| 1422098_at   | -0.038962843 | 5.058527845 | -0.524751761 | 0.611900611 | 0.611900611 | -5.50085048  |
| 1427546_at   | 0.059632743  | 4.586054929 | 0.524734887  | 0.611911894 | 0.611911894 | -5.50085877  |
| 1419989_at   | -0.046168884 | 4.389475494 | -0.524713129 | 0.611926443 | 0.611926443 | -5.500869459 |
| 1436723_at   | -0.037181349 | 8.08999534  | -0.5246741   | 0.611952542 | 0.611952542 | -5.500888632 |
| 1442862_at   | -0.038555174 | 4.037547423 | -0.524644302 | 0.611972468 | 0.611972468 | -5.500903269 |
| 1416159_at   | 0.055075761  | 8.910346204 | 0.524623042  | 0.611986685 | 0.611986685 | -5.500913713 |
| 1429494_at   | -0.044594753 | 7.415719658 | -0.524614723 | 0.611992248 | 0.611992248 | -5.500917798 |
| 1425206_a_at | 0.068314863  | 6.647274374 | 0.524576135  | 0.612018053 | 0.612018053 | -5.500936752 |
| 1436881_x_at | 0.070169339  | 3.658036401 | 0.524513895  | 0.612059676 | 0.612059676 | -5.500967319 |
| 1450319_at   | 0.054793514  | 4.136007755 | 0.524497527  | 0.612070622 | 0.612070622 | -5.500975357 |
| 1428279_a_at | -0.053005259 | 6.857649597 | -0.524475506 | 0.612085349 | 0.612085349 | -5.500986171 |
| 1426054_at   | 0.04015123   | 3.947782041 | 0.524458598  | 0.612096657 | 0.612096657 | -5.500994474 |
| 1421717_at   | 0.052184446  | 5.658973773 | 0.524385702  | 0.61214541  | 0.61214541  | -5.501030267 |
| 1452938_at   | 0.034196894  | 3.288750979 | 0.524368155  | 0.612157145 | 0.612157145 | -5.501038882 |
| 1430430_at   | 0.046520705  | 3.504935943 | 0.52432386   | 0.612186771 | 0.612186771 | -5.501060628 |
| 1441116_at   | -0.056822041 | 3.967876744 | -0.524314144 | 0.612193269 | 0.612193269 | -5.501065398 |
| 1422503_s_at | 0.033315989  | 10.03587467 | 0.524311109  | 0.612195299 | 0.612195299 | -5.501066888 |
| 1421264_at   | -0.060985775 | 4.089588314 | -0.524260097 | 0.612229418 | 0.612229418 | -5.501091929 |
| 1446616_at   | -0.035853762 | 6.583560528 | -0.524255994 | 0.612232163 | 0.612232163 | -5.501093943 |
| 1448109_a_at | -0.034614402 | 13.78038742 | -0.524223065 | 0.612254188 | 0.612254188 | -5.501110107 |
| 1431149_at   | -0.042045127 | 3.444158479 | -0.524212433 | 0.612261299 | 0.612261299 | -5.501115325 |
| 1443342_at   | -0.049427019 | 4.454544632 | -0.524155276 | 0.612299531 | 0.612299531 | -5.501143378 |
| 1435279_at   | -0.056073421 | 8.026558305 | -0.524151439 | 0.612302098 | 0.612302098 | -5.501145262 |
| 1434075_at   | 0.037878244  | 9.518423939 | 0.524123305  | 0.612320917 | 0.612320917 | -5.501159069 |
| 1439566_at   | 0.065765132  | 4.97679419  | 0.52402852   | 0.612384321 | 0.612384321 | -5.501205581 |
| 1450747_at   | -0.051986713 | 7.429832681 | -0.524013979 | 0.612394048 | 0.612394048 | -5.501212715 |
| 1444549_at   | 0.055757904  | 3.601801069 | 0.524001914  | 0.612402119 | 0.612402119 | -5.501218635 |
| 1457312_at   | 0.042289128  | 6.338884484 | 0.52395251   | 0.612435168 | 0.612435168 | -5.501242874 |
| 1448402_at   | -0.046443173 | 9.453750385 | -0.523949605 | 0.612437112 | 0.612437112 | -5.501244299 |
| 1416040_at   | 0.0423277    | 3.600052722 | 0.523933849  | 0.612447652 | 0.612447652 | -5.501252029 |
| 1452458_s_at | 0.040033004  | 7.700004298 | 0.523707699  | 0.612598952 | 0.612598952 | -5.501362952 |
| 1451517_at   | 0.038810051  | 5.378316708 | 0.523696487  | 0.612606453 | 0.612606453 | -5.50136845  |
| 1417777_at   | 0.041717696  | 9.419434279 | 0.523696483  | 0.612606456 | 0.612606456 | -5.501368452 |
| 1450229_at   | 0.051001973  | 5.938310593 | 0.523693817  | 0.61260824  | 0.61260824  | -5.50136976  |
| 1436776_x_at | 0.06982496   | 4.776236054 | 0.523647321  | 0.612639349 | 0.612639349 | -5.501392559 |
| 1419454_x_at | 0.055841802  | 7.367936461 | 0.523591327  | 0.612676815 | 0.612676815 | -5.501420013 |
| 1448686_at   | 0.043366237  | 4.788046959 | 0.523438749  | 0.61277891  | 0.61277891  | -5.50149481  |
| 1441878_s_at | 0.037353529  | 6.896620986 | 0.523438488  | 0.612779085 | 0.612779085 | -5.501494938 |
| 1417069_a_at | 0.061958549  | 8.214019952 | 0.523437465  | 0.61277977  | 0.61277977  | -5.501495439 |
| 1433152_at   | 0.036898865  | 3.456550122 | 0.5233961    | 0.61280745  | 0.61280745  | -5.501515713 |
| 1415876_a_at | 0.031111297  | 13.71343236 | 0.523336407  | 0.612847397 | 0.612847397 | -5.501544969 |
| 1436957_at   | 0.056406928  | 5.249099541 | 0.523298005  | 0.612873095 | 0.612873095 | -5.501563787 |
| 1457983_s_at | -0.044777461 | 9.907320962 | -0.523287567 | 0.612880081 | 0.612880081 | -5.501568902 |
| 1418700_at   | 0.03615032   | 8.771840455 | 0.523233822  | 0.612916049 | 0.612916049 | -5.501595237 |
| 1441884_x_at | 0.046857696  | 3.999626121 | 0.523183748  | 0.612949561 | 0.612949561 | -5.501619771 |
| 1416773_at   | 0.043704717  | 9.463827696 | 0.523174462  | 0.612955776 | 0.612955776 | -5.50162432  |
| 1437138_at   | 0.042344834  | 3.25536961  | 0.523138267  | 0.61298     | 0.61298     | -5.501642052 |
| 1450898_at   | -0.046317719 | 8.945654337 | -0.523102914 | 0.613003662 | 0.613003662 | -5.501659371 |
| 1416005_at   | 0.03752356   | 9.86797036  | 0.523091945  | 0.613011003 | 0.613011003 | -5.501664744 |
| 1425350_a_at | 0.051876245  | 8.829577633 | 0.523060224  | 0.613032234 | 0.613032234 | -5.501680282 |
| 1451375_at   | 0.049418429  | 7.942159175 | 0.522992443  | 0.613077602 | 0.613077602 | -5.50171348  |
| 1456149_at   | -0.044545499 | 6.391014833 | -0.522967551 | 0.613094263 | 0.613094263 | -5.501725671 |

|              |              |             |              |             |             |              |
|--------------|--------------|-------------|--------------|-------------|-------------|--------------|
| 1415983_at   | -0.044726684 | 8.333920936 | -0.522949797 | 0.613106146 | 0.613106146 | -5.501734366 |
| 1435469_at   | -0.035928636 | 7.241112518 | -0.522946812 | 0.613108145 | 0.613108145 | -5.501735828 |
| 1431009_at   | 0.064609183  | 5.023134898 | 0.522908537  | 0.613133764 | 0.613133764 | -5.501754571 |
| 1431212_a_at | 0.069827521  | 6.836091375 | 0.522900388  | 0.613139219 | 0.613139219 | -5.501758562 |
| 1446604_at   | 0.040015867  | 4.649589686 | 0.522867069  | 0.613161522 | 0.613161522 | -5.501774877 |
| 1449952_s_at | -0.039703571 | 4.185537091 | -0.522838948 | 0.613180346 | 0.613180346 | -5.501788646 |
| 1428651_at   | 0.048942228  | 7.717621129 | 0.522784953  | 0.61321649  | 0.61321649  | -5.501815082 |
| 1437292_at   | 0.037288659  | 3.456198632 | 0.52275168   | 0.613238764 | 0.613238764 | -5.501831371 |
| 1429020_at   | 0.052027718  | 3.739251977 | 0.522642227  | 0.613312037 | 0.613312037 | -5.501884948 |
| 1424025_at   | 0.066259755  | 7.99032927  | 0.522621577  | 0.613325861 | 0.613325861 | -5.501895055 |
| 1417894_at   | 0.063671782  | 5.446434175 | 0.522571592  | 0.613359325 | 0.613359325 | -5.501919518 |
| 1416557_a_at | 0.040237801  | 9.285310588 | 0.522536472  | 0.613382838 | 0.613382838 | -5.501936705 |
| 1447533_at   | -0.03810405  | 3.105810126 | -0.522478122 | 0.613421904 | 0.613421904 | -5.501965258 |
| 1439568_at   | 0.053149158  | 6.020356061 | 0.522426475  | 0.613456484 | 0.613456484 | -5.501990528 |
| 1424278_a_at | -0.033010177 | 9.582915767 | -0.522425183 | 0.613457349 | 0.613457349 | -5.50199116  |
| 1416842_at   | -0.037071876 | 11.07496517 | -0.522417491 | 0.613462499 | 0.613462499 | -5.501994924 |
| 1433986_at   | 0.033193571  | 9.031567358 | 0.522365209  | 0.613497505 | 0.613497505 | -5.502020502 |
| 1457669_x_at | -0.067826947 | 7.059341027 | -0.522311608 | 0.613533395 | 0.613533395 | -5.502046723 |
| 1418877_at   | -0.052150805 | 5.14464273  | -0.522299872 | 0.613541254 | 0.613541254 | -5.502052464 |
| 1424488_a_at | 0.034101136  | 8.485113585 | 0.522280405  | 0.613554289 | 0.613554289 | -5.502061986 |
| 1438394_x_at | 0.104570415  | 6.327739516 | 0.522266863  | 0.613563357 | 0.613563357 | -5.502068609 |
| 1443558_s_at | 0.062803765  | 7.906671993 | 0.522262292  | 0.613566418 | 0.613566418 | -5.502070845 |
| 1433581_at   | 0.065493292  | 10.28304447 | 0.522149392  | 0.613642019 | 0.613642019 | -5.502126061 |
| 1424541_at   | 0.047494808  | 9.056120274 | 0.522110769  | 0.613667883 | 0.613667883 | -5.502144948 |
| 1451716_at   | -0.073947817 | 7.555898043 | -0.52204143  | 0.613714318 | 0.613714318 | -5.502178852 |
| 1426309_at   | -0.044889145 | 4.522133707 | -0.522011382 | 0.613734441 | 0.613734441 | -5.502193542 |
| 1428950_s_at | -0.052746279 | 6.893164015 | -0.522009843 | 0.613735472 | 0.613735472 | -5.502194295 |
| 1434425_at   | 0.038076205  | 3.16048615  | 0.522009634  | 0.613735612 | 0.613735612 | -5.502194397 |
| 1444823_at   | -0.041631898 | 3.565687108 | -0.521995066 | 0.613745368 | 0.613745368 | -5.502201519 |
| 1428646_at   | -0.040624363 | 8.119094658 | -0.521990728 | 0.613748274 | 0.613748274 | -5.50220364  |
| 1435363_at   | 0.049165917  | 9.108333079 | 0.521972468  | 0.613760502 | 0.613760502 | -5.502212567 |
| 1434489_at   | -0.044355704 | 6.056163284 | -0.521937344 | 0.613784026 | 0.613784026 | -5.502229738 |
| 1438541_at   | 0.038408948  | 5.930099265 | 0.521931884  | 0.613787682 | 0.613787682 | -5.502232406 |
| 1419714_at   | 0.05993364   | 4.737652669 | 0.521926424  | 0.613791339 | 0.613791339 | -5.502235075 |
| 1441235_at   | -0.051165973 | 5.863812106 | -0.521918627 | 0.613796561 | 0.613796561 | -5.502238887 |
| 1451983_at   | 0.154543979  | 6.580186216 | 0.521911489  | 0.613801342 | 0.613801342 | -5.502242376 |
| 1456832_at   | 0.065972194  | 6.963676478 | 0.521907345  | 0.613804118 | 0.613804118 | -5.502244402 |
| 1428327_at   | -0.039641558 | 8.42871793  | -0.521895063 | 0.613812343 | 0.613812343 | -5.502250405 |
| 1443024_at   | 0.055840181  | 3.798114271 | 0.521868581  | 0.61383008  | 0.61383008  | -5.502263349 |
| 1445828_at   | -0.049172484 | 3.870264624 | -0.521853579 | 0.613840127 | 0.613840127 | -5.502270682 |
| 1443781_at   | 0.038346125  | 4.704942574 | 0.521814241  | 0.613866474 | 0.613866474 | -5.502289908 |
| 1458292_at   | -0.048299969 | 7.168883449 | -0.521811453 | 0.613868342 | 0.613868342 | -5.50229127  |
| 1457342_at   | -0.034393121 | 6.885430852 | -0.521807612 | 0.613870915 | 0.613870915 | -5.502293148 |
| 1422541_at   | -0.037264971 | 8.222122841 | -0.521786451 | 0.613885088 | 0.613885088 | -5.502303489 |
| 1428258_at   | -0.040288406 | 10.67507771 | -0.521775826 | 0.613892204 | 0.613892204 | -5.502308682 |
| 1458958_at   | -0.040543679 | 5.673670975 | -0.521691533 | 0.613948665 | 0.613948665 | -5.502349872 |
| 1440596_at   | -0.047714075 | 5.216635189 | -0.521668935 | 0.613963802 | 0.613963802 | -5.502360914 |
| 1458812_at   | -0.035317736 | 4.179114142 | -0.521668224 | 0.613964278 | 0.613964278 | -5.502361261 |
| 1438064_at   | -0.03328682  | 7.950856232 | -0.521656412 | 0.613972189 | 0.613972189 | -5.502367032 |
| 1436898_at   | 0.036943041  | 11.61512371 | 0.521636231  | 0.613985708 | 0.613985708 | -5.502376892 |
| 1446441_at   | 0.044787426  | 4.009677346 | 0.521628408  | 0.613990948 | 0.613990948 | -5.502380714 |
| 1433964_s_at | -0.051355558 | 5.585563172 | -0.521574336 | 0.614027168 | 0.614027168 | -5.50240713  |
| 1460192_at   | -0.040963627 | 8.75200182  | -0.521460295 | 0.614103564 | 0.614103564 | -5.502462836 |

|              |              |             |              |             |             |              |
|--------------|--------------|-------------|--------------|-------------|-------------|--------------|
| 1456599_at   | 0.06510203   | 6.546370325 | 0.521380599  | 0.614156954 | 0.614156954 | -5.502501758 |
| 1451175_at   | -0.034950772 | 10.12123718 | -0.521350612 | 0.614177044 | 0.614177044 | -5.502516402 |
| 1459316_at   | 0.041391685  | 4.296557081 | 0.521319414  | 0.614197945 | 0.614197945 | -5.502531636 |
| 1458715_at   | 0.03478985   | 5.010106885 | 0.521303906  | 0.614208335 | 0.614208335 | -5.502539208 |
| 1435132_at   | -0.049198572 | 4.409881255 | -0.521270955 | 0.614230411 | 0.614230411 | -5.502555297 |
| 1422554_at   | -0.039947584 | 8.220851589 | -0.521265545 | 0.614234036 | 0.614234036 | -5.502557939 |
| 1436537_at   | 0.039962482  | 8.03933883  | 0.521236741  | 0.614253334 | 0.614253334 | -5.502572001 |
| 1453738_at   | -0.047303017 | 5.381296814 | -0.521224717 | 0.61426139  | 0.61426139  | -5.502577872 |
| 1435063_at   | -0.034612964 | 4.272892456 | -0.521172425 | 0.614296427 | 0.614296427 | -5.5026034   |
| 1450237_at   | 0.03581931   | 3.718473528 | 0.52115522   | 0.614307954 | 0.614307954 | -5.502611799 |
| 1443868_at   | 0.04259853   | 4.348216783 | 0.521074087  | 0.614362316 | 0.614362316 | -5.502651401 |
| 1421910_at   | 0.033904576  | 8.960728422 | 0.520952218  | 0.614443979 | 0.614443979 | -5.502710876 |
| 1439997_at   | 0.058225569  | 3.940610181 | 0.520934242  | 0.614456024 | 0.614456024 | -5.502719648 |
| 1438934_x_at | 0.054192613  | 6.143678073 | 0.520870078  | 0.614499022 | 0.614499022 | -5.502750955 |
| 1439982_at   | 0.046973701  | 3.998660558 | 0.520850613  | 0.614512066 | 0.614512066 | -5.502760452 |
| 1445557_at   | 0.053534433  | 4.233303648 | 0.520796519  | 0.614548317 | 0.614548317 | -5.502786842 |
| 1440252_at   | 0.060650066  | 4.282165777 | 0.520657241  | 0.61464166  | 0.61464166  | -5.502854778 |
| 1428813_a_at | -0.033348761 | 6.657458194 | -0.520649635 | 0.614646757 | 0.614646757 | -5.502858487 |
| 1452267_at   | -0.049369903 | 6.735817327 | -0.520628074 | 0.614661208 | 0.614661208 | -5.502869002 |
| 1448771_a_at | 0.045676612  | 11.73810486 | 0.520556375  | 0.614709263 | 0.614709263 | -5.502903967 |
| 1426433_at   | -0.047517801 | 4.45816466  | -0.520464771 | 0.614770663 | 0.614770663 | -5.502948632 |
| 1424701_at   | 0.145136445  | 5.799832016 | 0.520445982  | 0.614783256 | 0.614783256 | -5.502957792 |
| 1434405_at   | -0.047416232 | 7.995679131 | -0.520443556 | 0.614784882 | 0.614784882 | -5.502958974 |
| 1432877_at   | 0.036725957  | 3.658961549 | 0.520418756  | 0.614801506 | 0.614801506 | -5.502971065 |
| 1418115_s_at | 0.031047803  | 10.28501998 | 0.520394006  | 0.614818096 | 0.614818096 | -5.50298313  |
| 1416891_at   | -0.03460588  | 9.013988251 | -0.520352129 | 0.614846167 | 0.614846167 | -5.503003544 |
| 1454588_at   | 0.045398147  | 4.81897128  | 0.520338288  | 0.614855445 | 0.614855445 | -5.503010291 |
| 1428913_at   | 0.043110022  | 7.965267123 | 0.520322226  | 0.614866212 | 0.614866212 | -5.503018119 |
| 1459933_at   | -0.041776383 | 3.204908133 | -0.520317142 | 0.61486962  | 0.61486962  | -5.503020598 |
| 1457870_at   | 0.048420411  | 3.942071552 | 0.520287029  | 0.614889806 | 0.614889806 | -5.503035274 |
| 1419144_at   | -0.035800425 | 3.780251578 | -0.520268887 | 0.614901968 | 0.614901968 | -5.503044117 |
| 1459903_at   | 0.043787488  | 6.880099682 | 0.520238829  | 0.614922117 | 0.614922117 | -5.503058766 |
| 1460617_s_at | -0.07437122  | 5.512121041 | -0.520231144 | 0.614927269 | 0.614927269 | -5.503062511 |
| 1429299_at   | -0.046347204 | 5.704952966 | -0.520220051 | 0.614934705 | 0.614934705 | -5.503067917 |
| 1453792_at   | -0.059506894 | 3.984818866 | -0.520151813 | 0.614980451 | 0.614980451 | -5.503101169 |
| 1440717_at   | -0.057669967 | 6.907806731 | -0.520056054 | 0.61504465  | 0.61504465  | -5.503147825 |
| 1437046_x_at | 0.037683694  | 8.854281174 | 0.520050816  | 0.615048162 | 0.615048162 | -5.503150377 |
| 1425940_a_at | -0.052942541 | 8.583899974 | -0.520014894 | 0.615072246 | 0.615072246 | -5.503167877 |
| 1455671_at   | 0.032290748  | 7.479260885 | 0.520001989  | 0.615080898 | 0.615080898 | -5.503174164 |
| 1444818_at   | 0.039083805  | 3.408266876 | 0.519958331  | 0.61511017  | 0.61511017  | -5.50319543  |
| 1438376_s_at | -0.059046553 | 10.58703074 | -0.519936618 | 0.615124728 | 0.615124728 | -5.503206007 |
| 1431745_a_at | 0.036778174  | 9.912871676 | 0.51990725   | 0.615144418 | 0.615144418 | -5.50322031  |
| 1431561_a_at | -0.041383837 | 7.054606177 | -0.519885017 | 0.615159326 | 0.615159326 | -5.503231139 |
| 1454034_a_at | -0.058757231 | 9.044106706 | -0.5198527   | 0.615180995 | 0.615180995 | -5.503246878 |
| 1446296_at   | -0.051219675 | 5.28572787  | -0.519807394 | 0.615211373 | 0.615211373 | -5.503268941 |
| 1453480_at   | -0.04040098  | 5.232302055 | -0.519765011 | 0.615239793 | 0.615239793 | -5.50328958  |
| 1439929_at   | 0.046961614  | 7.468345395 | 0.51970563   | 0.615279611 | 0.615279611 | -5.503318493 |
| 1459109_at   | -0.03476134  | 4.054992453 | -0.519626617 | 0.615332596 | 0.615332596 | -5.503356959 |
| 1418005_at   | -0.031962194 | 11.01400069 | -0.519552296 | 0.615382436 | 0.615382436 | -5.503393137 |
| 1460406_at   | 0.034756282  | 6.703079189 | 0.519528753  | 0.615398226 | 0.615398226 | -5.503404596 |
| 1428195_at   | 0.041767548  | 7.073671014 | 0.519518678  | 0.615404982 | 0.615404982 | -5.5034095   |
| 1460251_at   | -0.058518218 | 5.728112098 | -0.519407132 | 0.615479792 | 0.615479792 | -5.503463785 |
| 1455001_x_at | -0.033549504 | 12.4263084  | -0.519383406 | 0.615495704 | 0.615495704 | -5.50347533  |



|              |              |             |              |             |             |              |
|--------------|--------------|-------------|--------------|-------------|-------------|--------------|
| 1445623_at   | -0.050511885 | 3.455167504 | -0.519346565 | 0.615520414 | 0.615520414 | -5.503493257 |
| 1459080_at   | -0.037285511 | 3.708590251 | -0.519314671 | 0.615541805 | 0.615541805 | -5.503508774 |
| 1435846_x_at | 0.041493287  | 5.470219564 | 0.519302321  | 0.615550088 | 0.615550088 | -5.503514783 |
| 1435729_at   | -0.042127441 | 5.547101892 | -0.519301149 | 0.615550874 | 0.615550874 | -5.503515353 |
| 1418737_at   | -0.031951999 | 9.070944125 | -0.519258891 | 0.615579218 | 0.615579218 | -5.503535912 |
| 1425563_s_at | -0.06363698  | 5.990399185 | -0.519252804 | 0.615583301 | 0.615583301 | -5.503538873 |
| 1420204_at   | 0.064567276  | 4.061062889 | 0.519214323  | 0.615609112 | 0.615609112 | -5.503557592 |
| 1456461_at   | 0.035761031  | 3.488012167 | 0.519184186  | 0.615629326 | 0.615629326 | -5.503572252 |
| 1442984_at   | 0.044380248  | 3.369956095 | 0.519168135  | 0.615640093 | 0.615640093 | -5.503580059 |
| 1417727_at   | -0.033799123 | 10.46408615 | -0.519102549 | 0.615684087 | 0.615684087 | -5.503611959 |
| 1459488_at   | 0.133418923  | 7.031131008 | 0.519087337  | 0.615694291 | 0.615694291 | -5.503619357 |
| 1446288_at   | -0.044902242 | 7.877606821 | -0.519073018 | 0.615703897 | 0.615703897 | -5.503626321 |
| 1427040_at   | 0.04192108   | 9.475111894 | 0.519070992  | 0.615705255 | 0.615705255 | -5.503627306 |
| 1449160_at   | -0.038769734 | 4.723747857 | -0.519050677 | 0.615718883 | 0.615718883 | -5.503637185 |
| 1433212_at   | -0.035502846 | 3.452996482 | -0.519025164 | 0.615735998 | 0.615735998 | -5.503649592 |
| 1454090_at   | 0.057535147  | 4.067468477 | 0.519002729  | 0.615751048 | 0.615751048 | -5.503660502 |
| 1444503_at   | -0.035685173 | 7.532664826 | -0.518900486 | 0.615819637 | 0.615819637 | -5.503710214 |
| 1436910_at   | 0.047762039  | 8.100326613 | 0.518876118  | 0.615835985 | 0.615835985 | -5.503722061 |
| 1417401_at   | -0.05012553  | 9.132774534 | -0.518742009 | 0.61592596  | 0.61592596  | -5.50378725  |
| 1458945_at   | 0.045830688  | 3.768382007 | 0.518728795  | 0.615934826 | 0.615934826 | -5.503793672 |
| 1447652_at   | 0.035520171  | 4.561729891 | 0.518642342  | 0.615992832 | 0.615992832 | -5.503835687 |
| 1432391_at   | 0.061582046  | 5.108927665 | 0.518613633  | 0.616012095 | 0.616012095 | -5.503849637 |
| 1454666_at   | 0.040612925  | 9.646945985 | 0.518576443  | 0.616037049 | 0.616037049 | -5.503867708 |
| 1440534_at   | -0.045120798 | 4.934221182 | -0.518559483 | 0.616048428 | 0.616048428 | -5.503875948 |
| 1441207_at   | -0.047734313 | 3.609603178 | -0.518542596 | 0.61605976  | 0.61605976  | -5.503884153 |
| 1423125_at   | 0.066200968  | 5.077022193 | 0.518445848  | 0.61612468  | 0.61612468  | -5.503931155 |
| 1441319_at   | 0.031902365  | 6.127391542 | 0.518407178  | 0.61615063  | 0.61615063  | -5.503949939 |
| 1456223_at   | -0.062552843 | 5.992327509 | -0.518362778 | 0.616180425 | 0.616180425 | -5.503971504 |
| 1436088_at   | 0.061649293  | 6.758700116 | 0.518354967  | 0.616185666 | 0.616185666 | -5.503975298 |
| 1419179_at   | -0.129615239 | 6.825838544 | -0.518311005 | 0.616215168 | 0.616215168 | -5.503996649 |
| 1418729_at   | -0.037818055 | 5.538532373 | -0.518293264 | 0.616227075 | 0.616227075 | -5.504005265 |
| 1424804_at   | 0.033049632  | 8.387317652 | 0.51828291   | 0.616234023 | 0.616234023 | -5.504010293 |
| 1456551_at   | 0.051218524  | 4.412658215 | 0.518265886  | 0.616245448 | 0.616245448 | -5.504018561 |
| 1427397_at   | -0.043495369 | 6.649383783 | -0.518265277 | 0.616245857 | 0.616245857 | -5.504018856 |
| 1434876_at   | -0.03706978  | 9.472013584 | -0.5182493   | 0.616256579 | 0.616256579 | -5.504026615 |
| 1447955_at   | 0.038838452  | 3.812364963 | 0.518126574  | 0.616338945 | 0.616338945 | -5.504086204 |
| 1451349_at   | -0.110444591 | 7.64585175  | -0.518070562 | 0.616376539 | 0.616376539 | -5.504113395 |
| 1424168_a_at | 0.036642233  | 11.32116788 | 0.518049742  | 0.616390513 | 0.616390513 | -5.504123502 |
| 1430532_at   | 0.033429436  | 3.76999973  | 0.517982553  | 0.61643561  | 0.61643561  | -5.504156116 |
| 1454119_at   | -0.065235495 | 5.309330755 | -0.517921373 | 0.616476676 | 0.616476676 | -5.504185808 |
| 1419484_a_at | 0.046047938  | 8.932679779 | 0.517858959  | 0.616518571 | 0.616518571 | -5.504216096 |
| 1429878_a_at | -0.039845247 | 5.996835189 | -0.517774818 | 0.616575053 | 0.616575053 | -5.504256924 |
| 1430167_a_at | 0.070427507  | 4.805701047 | 0.517774305  | 0.616575397 | 0.616575397 | -5.504257172 |
| 1426348_at   | -0.050339671 | 10.35388425 | -0.517716127 | 0.616614452 | 0.616614452 | -5.504285398 |
| 1457357_at   | 0.069135783  | 8.586999406 | 0.517707362  | 0.616620336 | 0.616620336 | -5.50428965  |
| 1451252_at   | -0.058512205 | 9.014851681 | -0.517694375 | 0.616629055 | 0.616629055 | -5.50429595  |
| 1417242_at   | -0.033043435 | 11.11793759 | -0.517662848 | 0.61665022  | 0.61665022  | -5.504311244 |
| 1425434_a_at | -0.062291435 | 5.883867331 | -0.517651779 | 0.616657651 | 0.616657651 | -5.504316613 |
| 1454210_at   | 0.050078529  | 4.702834573 | 0.517626451  | 0.616674655 | 0.616674655 | -5.504328899 |
| 1426285_at   | 0.057089416  | 7.95832425  | 0.517595207  | 0.61669563  | 0.61669563  | -5.504344053 |
| 1455382_at   | 0.050107461  | 3.630590306 | 0.517563541  | 0.61671689  | 0.61671689  | -5.504359411 |
| 1423581_at   | -0.050991936 | 5.025760404 | -0.517560172 | 0.616719152 | 0.616719152 | -5.504361046 |
| 1435738_x_at | -0.038075604 | 12.49048915 | -0.517558545 | 0.616720244 | 0.616720244 | -5.504361834 |

|              |              |             |              |             |             |              |
|--------------|--------------|-------------|--------------|-------------|-------------|--------------|
| 1423179_at   | 0.039902498  | 5.941570615 | 0.517536182  | 0.616735258 | 0.616735258 | -5.50437268  |
| 1454123_at   | 0.038588884  | 4.108641255 | 0.51752456   | 0.616743061 | 0.616743061 | -5.504378317 |
| 1422731_at   | 0.048216456  | 9.694936765 | 0.517436793  | 0.616801988 | 0.616801988 | -5.504420877 |
| 1453463_at   | 0.03561741   | 3.839731092 | 0.51742467   | 0.616810128 | 0.616810128 | -5.504426755 |
| 1436504_x_at | -0.035033556 | 4.316806915 | -0.517400207 | 0.616826553 | 0.616826553 | -5.504438616 |
| 1459666_at   | -0.046880426 | 6.399213777 | -0.517397555 | 0.616828334 | 0.616828334 | -5.504439902 |
| 1440627_at   | 0.034324764  | 5.735812819 | 0.517345031  | 0.6168636   | 0.6168636   | -5.504465367 |
| 1458367_at   | 0.054822034  | 3.861229704 | 0.517311735  | 0.616885957 | 0.616885957 | -5.504481508 |
| 1426257_a_at | -0.041318179 | 9.544204253 | -0.51730858  | 0.616888076 | 0.616888076 | -5.504483038 |
| 1441137_at   | 0.033514354  | 9.573098283 | 0.517211203  | 0.616953463 | 0.616953463 | -5.50453024  |
| 1428836_at   | -0.034028654 | 7.163653911 | -0.517195757 | 0.616963835 | 0.616963835 | -5.504537726 |
| 1430898_s_at | 0.059117268  | 4.31232098  | 0.517184034  | 0.616971707 | 0.616971707 | -5.504543408 |
| 1455538_at   | -0.059797391 | 7.086787356 | -0.517171933 | 0.616979833 | 0.616979833 | -5.504549272 |
| 1429527_a_at | 0.097134137  | 6.4706898   | 0.517145503  | 0.616997582 | 0.616997582 | -5.504562082 |
| 1451088_a_at | -0.033077255 | 8.344733935 | -0.517118723 | 0.617015565 | 0.617015565 | -5.504575059 |
| 1457517_at   | -0.033878402 | 4.895181637 | -0.51707127  | 0.617047432 | 0.617047432 | -5.504598054 |
| 1444784_at   | -0.055828197 | 4.888044877 | -0.51702349  | 0.61707952  | 0.61707952  | -5.504621206 |
| 1453600_at   | -0.066395085 | 6.16616164  | -0.516976847 | 0.617110844 | 0.617110844 | -5.504643804 |
| 1431644_a_at | -0.042272321 | 6.54635508  | -0.516970045 | 0.617115412 | 0.617115412 | -5.5046471   |
| 1442321_at   | -0.045050513 | 4.611548516 | -0.516966701 | 0.617117658 | 0.617117658 | -5.50464872  |
| 1451477_at   | 0.059692739  | 6.680174182 | 0.516871591  | 0.617181535 | 0.617181535 | -5.504694794 |
| 1459637_at   | 0.052838746  | 4.408968382 | 0.516860766  | 0.617188805 | 0.617188805 | -5.504700037 |
| 1423786_at   | -0.033219341 | 8.594845414 | -0.516836315 | 0.617205228 | 0.617205228 | -5.504711881 |
| 1415872_at   | 0.032079177  | 12.67975454 | 0.51680055   | 0.617229249 | 0.617229249 | -5.504729203 |
| 1432801_at   | -0.05754179  | 4.472218795 | -0.516767551 | 0.617251414 | 0.617251414 | -5.504745185 |
| 1429980_x_at | -0.053762757 | 6.237965043 | -0.516764026 | 0.617253781 | 0.617253781 | -5.504746892 |
| 1430879_at   | -0.036199503 | 3.188464589 | -0.516731815 | 0.617275416 | 0.617275416 | -5.504762491 |
| 1424898_at   | -0.046046883 | 3.919094856 | -0.516720511 | 0.617283009 | 0.617283009 | -5.504767965 |
| 1425779_a_at | 0.047469939  | 7.878192157 | 0.516688331  | 0.617304624 | 0.617304624 | -5.504783548 |
| 1454280_at   | -0.031966999 | 3.927709002 | -0.516629813 | 0.617343931 | 0.617343931 | -5.504811883 |
| 1432757_at   | -0.038407397 | 8.506230347 | -0.51661455  | 0.617354184 | 0.617354184 | -5.504819273 |
| 1418564_s_at | 0.04244309   | 11.7129541  | 0.516614492  | 0.617354223 | 0.617354223 | -5.504819301 |
| 1432574_at   | -0.039238657 | 6.471742088 | -0.51660797  | 0.617358603 | 0.617358603 | -5.504822458 |
| 1423973_a_at | -0.054590544 | 9.104973014 | -0.516583295 | 0.617375179 | 0.617375179 | -5.504834405 |
| 1417047_at   | 0.058347173  | 4.257793606 | 0.516571175  | 0.61738332  | 0.61738332  | -5.504840272 |
| 1451622_at   | 0.039602816  | 8.849673894 | 0.516559798  | 0.617390962 | 0.617390962 | -5.50484578  |
| 1419288_at   | -0.041686591 | 5.984206535 | -0.516534427 | 0.617408006 | 0.617408006 | -5.504858062 |
| 1419462_s_at | 0.040308258  | 9.985029146 | 0.51649572   | 0.617434007 | 0.617434007 | -5.504876799 |
| 1426808_at   | -0.113441734 | 9.115540988 | -0.516491906 | 0.61743657  | 0.61743657  | -5.504878645 |
| 1428915_at   | 0.039871764  | 7.535345399 | 0.516476024  | 0.617447238 | 0.617447238 | -5.504886333 |
| 1457856_at   | -0.03393952  | 3.198029776 | -0.516442107 | 0.617470024 | 0.617470024 | -5.50490275  |
| 1418818_at   | -0.051624662 | 4.748294302 | -0.516435845 | 0.617474231 | 0.617474231 | -5.504905781 |
| 1441300_at   | 0.048746356  | 4.689155599 | 0.516424913  | 0.617481574 | 0.617481574 | -5.504911072 |
| 1434198_at   | 0.056794962  | 4.304527397 | 0.516408899  | 0.617492332 | 0.617492332 | -5.504918822 |
| 1460635_at   | 0.046402483  | 8.402773673 | 0.516392331  | 0.617503463 | 0.617503463 | -5.504926841 |
| 1427675_at   | 0.031911202  | 3.094560218 | 0.516390167  | 0.617504917 | 0.617504917 | -5.504927888 |
| 1421956_at   | 0.046225929  | 4.988963025 | 0.516342554  | 0.617536904 | 0.617536904 | -5.50495093  |
| 1417319_at   | -0.048898921 | 6.315255082 | -0.516334991 | 0.617541985 | 0.617541985 | -5.50495459  |
| 1435464_at   | -0.055981776 | 8.378720131 | -0.516264436 | 0.617589387 | 0.617589387 | -5.504988731 |
| 1453309_at   | 0.057481188  | 3.731063403 | 0.516249693  | 0.617599292 | 0.617599292 | -5.504995864 |
| 1418848_at   | 0.052807426  | 4.099818177 | 0.516190735  | 0.617638904 | 0.617638904 | -5.505024389 |
| 1419670_at   | 0.050796861  | 5.176111818 | 0.516175258  | 0.617649304 | 0.617649304 | -5.505031876 |
| 1430329_at   | -0.037783888 | 4.329159358 | -0.516103094 | 0.617697791 | 0.617697791 | -5.505066785 |

|              |              |             |              |             |             |              |
|--------------|--------------|-------------|--------------|-------------|-------------|--------------|
| 1437055_x_at | -0.03804363  | 6.187900736 | -0.516068664 | 0.617720925 | 0.617720925 | -5.505083439 |
| 1416096_at   | 0.034246967  | 8.697809257 | 0.516036577  | 0.617742485 | 0.617742485 | -5.505098958 |
| 1445915_at   | -0.036497116 | 4.750107467 | -0.516025398 | 0.617749997 | 0.617749997 | -5.505104365 |
| 1419904_at   | 0.049658642  | 3.775220209 | 0.516013855  | 0.617757754 | 0.617757754 | -5.505109948 |
| 1449965_at   | -0.056740808 | 4.196966591 | -0.516000798 | 0.617766527 | 0.617766527 | -5.505116262 |
| 1445247_at   | -0.068830182 | 4.607335608 | -0.51596596  | 0.617789937 | 0.617789937 | -5.50513311  |
| 1426183_a_at | 0.040421113  | 4.123325574 | 0.515949377  | 0.61780108  | 0.61780108  | -5.505141129 |
| 1415938_at   | -0.042136626 | 3.784424675 | -0.515901593 | 0.61783319  | 0.61783319  | -5.505164236 |
| 1418645_at   | 0.046504276  | 4.100187915 | 0.515873139  | 0.617852311 | 0.617852311 | -5.505177994 |
| 1449350_at   | 0.053514342  | 9.002464851 | 0.515821932  | 0.617886723 | 0.617886723 | -5.505202752 |
| 1418606_at   | -0.054205254 | 3.346557055 | -0.515812476 | 0.617893077 | 0.617893077 | -5.505207323 |
| 1433102_at   | 0.067930889  | 3.583786022 | 0.515801727  | 0.617900301 | 0.617900301 | -5.50521252  |
| 1431574_at   | 0.039118728  | 3.925016333 | 0.515799323  | 0.617901917 | 0.617901917 | -5.505213682 |
| 1425372_at   | -0.043029199 | 5.674456602 | -0.515772534 | 0.61791992  | 0.61791992  | -5.505226633 |
| 1416776_at   | 0.226470252  | 6.020284819 | 0.515736297  | 0.617944273 | 0.617944273 | -5.50524415  |
| 1453712_a_at | -0.04965309  | 6.490549013 | -0.515712504 | 0.617960263 | 0.617960263 | -5.505255651 |
| 1426840_at   | 0.042310734  | 9.492494742 | 0.51568438   | 0.617979164 | 0.617979164 | -5.505269245 |
| 1417480_at   | -0.036874381 | 8.958957361 | -0.515636412 | 0.618011403 | 0.618011403 | -5.505292429 |
| 1448452_at   | -0.046912472 | 5.638714226 | -0.515596715 | 0.618038083 | 0.618038083 | -5.505311614 |
| 1419088_at   | -0.035260678 | 6.901021035 | -0.515593954 | 0.618039939 | 0.618039939 | -5.505312948 |
| 1442435_at   | -0.041758027 | 7.827873532 | -0.515589851 | 0.618042696 | 0.618042696 | -5.505314931 |
| 1441663_at   | -0.043101592 | 7.195264027 | -0.515560504 | 0.618062421 | 0.618062421 | -5.505329113 |
| 1423681_at   | -0.043132525 | 8.498348705 | -0.51545961  | 0.618130235 | 0.618130235 | -5.505377864 |
| 1436496_at   | -0.03586086  | 4.099098798 | -0.51545058  | 0.618136305 | 0.618136305 | -5.505382227 |
| 1434890_at   | 0.03862705   | 9.299769083 | 0.515447057  | 0.618138673 | 0.618138673 | -5.505383929 |
| 1445745_at   | -0.045364917 | 4.147770005 | -0.515444778 | 0.618140205 | 0.618140205 | -5.50538503  |
| 1424190_at   | -0.059146954 | 6.074737975 | -0.515376833 | 0.618185876 | 0.618185876 | -5.505417855 |
| 1427931_s_at | 0.044003673  | 5.200551966 | 0.515371444  | 0.618189498 | 0.618189498 | -5.505420458 |
| 1453548_at   | -0.049774423 | 4.132436972 | -0.51530711  | 0.618232744 | 0.618232744 | -5.505451534 |
| 1419057_at   | 0.045771449  | 3.929755149 | 0.515285669  | 0.618247157 | 0.618247157 | -5.50546189  |
| 1426537_at   | 0.043037831  | 6.566294014 | 0.515262659  | 0.618262625 | 0.618262625 | -5.505473004 |
| 1456900_at   | -0.050574296 | 4.364984165 | -0.51523624  | 0.618280385 | 0.618280385 | -5.505485763 |
| 1428293_at   | -0.04033023  | 9.533646193 | -0.515215022 | 0.618294648 | 0.618294648 | -5.50549601  |
| 1438911_at   | 0.052212502  | 4.206211827 | 0.515167882  | 0.618326339 | 0.618326339 | -5.505518775 |
| 1453639_s_at | -0.060864556 | 5.348401878 | -0.515122079 | 0.618357131 | 0.618357131 | -5.505540891 |
| 1424695_at   | 0.05243202   | 6.438143556 | 0.515119968  | 0.61835855  | 0.61835855  | -5.505541911 |
| 1415852_at   | -0.034355279 | 11.58832306 | -0.515117693 | 0.618360079 | 0.618360079 | -5.505543009 |
| 1456586_x_at | -0.065460974 | 5.695512499 | -0.515091575 | 0.618377638 | 0.618377638 | -5.50555562  |
| 1459863_x_at | -0.049454575 | 4.796768427 | -0.515082496 | 0.618383742 | 0.618383742 | -5.505560003 |
| 1423124_x_at | 0.051349367  | 4.989554069 | 0.515078027  | 0.618386746 | 0.618386746 | -5.505562161 |
| 1447492_at   | 0.042389941  | 3.504216873 | 0.515038446  | 0.618413357 | 0.618413357 | -5.50558127  |
| 1446195_at   | -0.055827513 | 4.690190784 | -0.515037494 | 0.618413997 | 0.618413997 | -5.50558173  |
| 1437992_x_at | 0.05951496   | 11.56504375 | 0.515034791  | 0.618415814 | 0.618415814 | -5.505583035 |
| 1424415_s_at | 0.079652897  | 6.256369442 | 0.515025278  | 0.61842221  | 0.61842221  | -5.505587627 |
| 1459063_at   | 0.053136107  | 4.035954516 | 0.515003432  | 0.618436897 | 0.618436897 | -5.505598174 |
| 1425651_at   | 0.044357257  | 3.929296754 | 0.514985187  | 0.618449164 | 0.618449164 | -5.505606981 |
| 1450069_a_at | 0.073386696  | 8.747174094 | 0.51493707   | 0.618481515 | 0.618481515 | -5.505630208 |
| 1434017_at   | -0.049493282 | 7.053751399 | -0.514903061 | 0.618504382 | 0.618504382 | -5.505646623 |
| 1430536_a_at | 0.034658092  | 11.85665848 | 0.514876419  | 0.618522295 | 0.618522295 | -5.505659482 |
| 1437143_a_at | -0.057950213 | 10.28622047 | -0.514856129 | 0.618535937 | 0.618535937 | -5.505669274 |
| 1442242_at   | -0.083271506 | 4.187050561 | -0.514854677 | 0.618536914 | 0.618536914 | -5.505669975 |
| 1421423_at   | -0.042235528 | 3.80301199  | -0.514794184 | 0.618577589 | 0.618577589 | -5.505699168 |
| 1454020_at   | -0.03415134  | 4.345513345 | -0.514761294 | 0.618599704 | 0.618599704 | -5.505715039 |

|              |              |             |              |             |             |              |
|--------------|--------------|-------------|--------------|-------------|-------------|--------------|
| 1439556_at   | -0.050665597 | 7.836905261 | -0.514750226 | 0.618607147 | 0.618607147 | -5.50572038  |
| 1452808_at   | 0.038418757  | 8.219871125 | 0.514746066  | 0.618609944 | 0.618609944 | -5.505722387 |
| 1456802_at   | -0.040739799 | 3.233025062 | -0.514720878 | 0.618626881 | 0.618626881 | -5.505734541 |
| 1428744_s_at | -0.039255929 | 8.881817103 | -0.514657231 | 0.61866968  | 0.61866968  | -5.505765248 |
| 1437508_at   | 0.042369323  | 5.621550501 | 0.514651919  | 0.618673252 | 0.618673252 | -5.505767811 |
| 1439354_at   | 0.041894028  | 3.43938364  | 0.514558554  | 0.618736038 | 0.618736038 | -5.50581285  |
| 1432384_a_at | 0.032901364  | 8.452869449 | 0.514549926  | 0.61874184  | 0.61874184  | -5.505817011 |
| 1445751_at   | 0.03134121   | 3.191919157 | 0.514499721  | 0.618775603 | 0.618775603 | -5.505841227 |
| 1440711_at   | 0.05355048   | 3.888388374 | 0.514489912  | 0.6187822   | 0.6187822   | -5.505845957 |
| 1419407_at   | -0.046710938 | 3.882967042 | -0.514460871 | 0.618801731 | 0.618801731 | -5.505859963 |
| 1430397_at   | -0.043133958 | 4.338812121 | -0.514444946 | 0.618812441 | 0.618812441 | -5.505867643 |
| 1439834_at   | 0.047027561  | 4.235490601 | 0.514425773  | 0.618825335 | 0.618825335 | -5.50587689  |
| 1433095_at   | -0.054439005 | 5.961307573 | -0.514417727 | 0.618830746 | 0.618830746 | -5.505880769 |
| 1436991_x_at | -0.066161314 | 10.58669202 | -0.514368795 | 0.618863656 | 0.618863656 | -5.505904365 |
| 1425743_at   | 0.063543342  | 3.734183275 | 0.514368082  | 0.618864135 | 0.618864135 | -5.505904708 |
| 1426954_at   | 0.040547113  | 9.491671819 | 0.514338874  | 0.61888378  | 0.61888378  | -5.505918792 |
| 1430157_at   | -0.042673776 | 3.526628658 | -0.514319907 | 0.618896537 | 0.618896537 | -5.505927937 |
| 1457725_at   | 0.062312112  | 4.427711531 | 0.514313485  | 0.618900856 | 0.618900856 | -5.505931033 |
| 1426611_at   | 0.033232206  | 10.94232269 | 0.514286065  | 0.618919298 | 0.618919298 | -5.505944253 |
| 1460565_at   | 0.051790999  | 7.798975321 | 0.514245138  | 0.618946826 | 0.618946826 | -5.505963984 |
| 1420686_at   | -0.040065847 | 4.032622787 | -0.514198436 | 0.618978239 | 0.618978239 | -5.505986497 |
| 1430138_at   | 0.052339793  | 6.665021003 | 0.514169319  | 0.618997824 | 0.618997824 | -5.506000533 |
| 1422796_at   | -0.043559925 | 8.670195094 | -0.514157952 | 0.61900547  | 0.61900547  | -5.506006011 |
| 1419910_at   | -0.050840177 | 4.429945517 | -0.514013139 | 0.619102881 | 0.619102881 | -5.506075802 |
| 1451242_a_at | -0.066700864 | 8.581940182 | -0.513989273 | 0.619118935 | 0.619118935 | -5.506087302 |
| 1441961_at   | 0.091277265  | 5.479468122 | 0.513984029  | 0.619122463 | 0.619122463 | -5.506089829 |
| 1450771_at   | 0.048430353  | 3.283156158 | 0.513941572  | 0.619151024 | 0.619151024 | -5.506110286 |
| 1440523_at   | 0.049594866  | 3.607662572 | 0.513934208  | 0.619155978 | 0.619155978 | -5.506113834 |
| 1454989_at   | -0.046110885 | 8.784059186 | -0.513877907 | 0.619193854 | 0.619193854 | -5.506140959 |
| 1449933_a_at | 0.03379444   | 9.570868839 | 0.513876689  | 0.619194673 | 0.619194673 | -5.506141546 |
| 1439660_at   | -0.052873386 | 5.710201632 | -0.513860677 | 0.619205445 | 0.619205445 | -5.506149259 |
| 1442309_at   | -0.064416162 | 5.692564551 | -0.51384556  | 0.619215615 | 0.619215615 | -5.506156542 |
| 1424519_at   | -0.054563557 | 7.542915227 | -0.513829196 | 0.619226625 | 0.619226625 | -5.506164425 |
| 1417216_at   | -0.059315504 | 6.725740667 | -0.513790532 | 0.619252637 | 0.619252637 | -5.506183049 |
| 1446909_at   | 0.064505875  | 5.488972856 | 0.513760932  | 0.619272551 | 0.619272551 | -5.506197307 |
| 1431498_at   | 0.037336454  | 3.716729021 | 0.513753956  | 0.619277244 | 0.619277244 | -5.506200667 |
| 1445704_x_at | -0.035196787 | 3.167461175 | -0.513750291 | 0.61927971  | 0.61927971  | -5.506202431 |
| 1431106_a_at | -0.034302574 | 3.949981856 | -0.513664001 | 0.619337767 | 0.619337767 | -5.506243989 |
| 1426413_at   | 0.044343068  | 3.978778569 | 0.513649013  | 0.619347851 | 0.619347851 | -5.506251207 |
| 1441401_at   | -0.037291783 | 3.324231536 | -0.513632533 | 0.619358939 | 0.619358939 | -5.506259143 |
| 1454631_at   | 0.041158405  | 8.374137004 | 0.513593758  | 0.619385029 | 0.619385029 | -5.506277814 |
| 1438212_at   | 0.044406667  | 7.452833868 | 0.513550975  | 0.619413816 | 0.619413816 | -5.506298413 |
| 1433590_at   | 0.051635779  | 6.028989806 | 0.513538118  | 0.619422467 | 0.619422467 | -5.506304604 |
| 1454601_at   | -0.041777276 | 4.957017045 | -0.513516961 | 0.619436703 | 0.619436703 | -5.50631479  |
| 1452842_at   | -0.054198155 | 3.91294097  | -0.513438246 | 0.61948967  | 0.61948967  | -5.506352683 |
| 1451233_at   | -0.038709132 | 7.22290168  | -0.513434121 | 0.619492446 | 0.619492446 | -5.506354669 |
| 1457256_x_at | 0.044017229  | 9.255752782 | 0.513431486  | 0.619494219 | 0.619494219 | -5.506355937 |
| 1432245_s_at | 0.047693818  | 7.440136786 | 0.513425653  | 0.619498144 | 0.619498144 | -5.506358745 |
| 1441736_at   | -0.038727201 | 3.31176535  | -0.513425127 | 0.619498498 | 0.619498498 | -5.506358998 |
| 1454985_at   | -0.044597126 | 7.972746792 | -0.513359977 | 0.619542339 | 0.619542339 | -5.506390357 |
| 1428452_at   | -0.034619593 | 8.792188672 | -0.513303714 | 0.619580201 | 0.619580201 | -5.506417435 |
| 1453108_at   | -0.095239283 | 7.342299673 | -0.51328714  | 0.619591355 | 0.619591355 | -5.506425411 |
| 1442837_at   | 0.091602921  | 7.736921326 | 0.513273409  | 0.619600596 | 0.619600596 | -5.506432019 |

|              |              |             |              |             |             |              |
|--------------|--------------|-------------|--------------|-------------|-------------|--------------|
| 1426356_at   | -0.041147942 | 6.824867505 | -0.513271181 | 0.619602094 | 0.619602094 | -5.506433091 |
| 1449656_at   | 0.043405476  | 4.508585897 | 0.513203771  | 0.619647461 | 0.619647461 | -5.506465528 |
| 1448712_at   | -0.04299156  | 7.732134922 | -0.513202406 | 0.619648379 | 0.619648379 | -5.506466185 |
| 1432031_at   | -0.042715499 | 4.530223363 | -0.513094358 | 0.619721097 | 0.619721097 | -5.506518168 |
| 1450900_at   | -0.036614912 | 9.100166192 | -0.513089364 | 0.619724458 | 0.619724458 | -5.50652057  |
| 1441480_at   | -0.050141754 | 6.528307654 | -0.513008934 | 0.619778592 | 0.619778592 | -5.506559259 |
| 1428180_at   | -0.039372461 | 8.245145094 | -0.51295082  | 0.619817707 | 0.619817707 | -5.50658721  |
| 1457293_at   | 0.066370185  | 7.29832901  | 0.512904106  | 0.619849151 | 0.619849151 | -5.506609676 |
| 1436687_x_at | -0.039515775 | 4.465239156 | -0.512803628 | 0.619916785 | 0.619916785 | -5.506657991 |
| 1428221_at   | 0.04074335   | 7.030924012 | 0.512802126  | 0.619917796 | 0.619917796 | -5.506658714 |
| 1446033_at   | -0.03438915  | 5.119225789 | -0.512800714 | 0.619918747 | 0.619918747 | -5.506659393 |
| 1446435_at   | -0.033264561 | 4.286332787 | -0.512792735 | 0.619924118 | 0.619924118 | -5.506663229 |
| 1424297_at   | -0.042569663 | 7.684618273 | -0.512784702 | 0.619929525 | 0.619929525 | -5.506667091 |
| 1423445_at   | 0.040381826  | 8.648847111 | 0.512775055  | 0.619936019 | 0.619936019 | -5.506671729 |
| 1454870_x_at | 0.042868532  | 6.159129417 | 0.512765384  | 0.619942529 | 0.619942529 | -5.506676379 |
| 1432197_at   | 0.053496757  | 5.707368387 | 0.512764547  | 0.619943093 | 0.619943093 | -5.506676781 |
| 1423691_x_at | -0.07299689  | 9.852214807 | -0.512741883 | 0.619958349 | 0.619958349 | -5.506687677 |
| 1435589_at   | 0.042547154  | 7.032924257 | 0.512688627  | 0.6199942   | 0.6199942   | -5.506713279 |
| 1456617_a_at | 0.037271046  | 11.13767826 | 0.512670788  | 0.620006209 | 0.620006209 | -5.506721854 |
| 1442306_at   | -0.035140083 | 3.100064862 | -0.512641191 | 0.620026134 | 0.620026134 | -5.506736081 |
| 1431341_at   | -0.059505261 | 4.511858812 | -0.512635722 | 0.620029815 | 0.620029815 | -5.50673871  |
| 1440932_at   | 0.032149519  | 3.373213833 | 0.512611393  | 0.620046194 | 0.620046194 | -5.506750404 |
| 1425868_at   | -0.04749797  | 5.241562612 | -0.512599886 | 0.620053941 | 0.620053941 | -5.506755935 |
| 1438726_at   | 0.058869608  | 4.006526514 | 0.512518595  | 0.620108669 | 0.620108669 | -5.506795003 |
| 1418293_at   | -0.105872755 | 6.77974518  | -0.512397502 | 0.620190198 | 0.620190198 | -5.506853189 |
| 1426268_at   | 0.044017713  | 4.064893419 | 0.512351878  | 0.620220916 | 0.620220916 | -5.506875108 |
| 1429040_at   | 0.075649879  | 9.984545025 | 0.512344467  | 0.620225906 | 0.620225906 | -5.506878668 |
| 1457089_at   | -0.033125013 | 6.055544339 | -0.51226784  | 0.620277501 | 0.620277501 | -5.506915478 |
| 1433660_at   | 0.032800041  | 8.112432924 | 0.51220996   | 0.620316475 | 0.620316475 | -5.506943278 |
| 1426425_at   | 0.036613267  | 10.55844831 | 0.512185048  | 0.62033325  | 0.62033325  | -5.506955243 |
| 1433398_at   | -0.058323969 | 4.920790737 | -0.512162407 | 0.620348496 | 0.620348496 | -5.506966116 |
| 1419718_at   | -0.033120269 | 3.611982639 | -0.512014692 | 0.620447969 | 0.620447969 | -5.507037046 |
| 1449090_a_at | -0.058055462 | 7.954885222 | -0.511948154 | 0.620492779 | 0.620492779 | -5.50706899  |
| 1443114_at   | 0.050974658  | 7.321998795 | 0.511947346  | 0.620493323 | 0.620493323 | -5.507069378 |
| 1423889_at   | -0.048161927 | 7.602534943 | -0.511921312 | 0.620510856 | 0.620510856 | -5.507081876 |
| 1423494_at   | -0.044443173 | 4.623096414 | -0.511900187 | 0.620525084 | 0.620525084 | -5.507092016 |
| 1416287_at   | 0.076530544  | 6.114599244 | 0.511872885  | 0.620543471 | 0.620543471 | -5.507105121 |
| 1436992_x_at | 0.034228306  | 11.9889464  | 0.51180369   | 0.620590074 | 0.620590074 | -5.507138332 |
| 1453987_at   | -0.034107888 | 3.421326652 | -0.511801962 | 0.620591238 | 0.620591238 | -5.507139161 |
| 1459172_at   | -0.043792763 | 4.194978054 | -0.511799864 | 0.620592651 | 0.620592651 | -5.507140168 |
| 1440896_at   | 0.040480426  | 7.714184877 | 0.511745378  | 0.620629348 | 0.620629348 | -5.507166316 |
| 1454698_at   | 0.035690803  | 10.09316328 | 0.51170357   | 0.620657508 | 0.620657508 | -5.507186378 |
| 1430118_at   | -0.045391471 | 3.752773368 | -0.511682017 | 0.620672026 | 0.620672026 | -5.50719672  |
| 1454118_at   | -0.039123666 | 5.655186905 | -0.51168178  | 0.620672185 | 0.620672185 | -5.507196834 |
| 1431321_at   | 0.052342585  | 4.649907785 | 0.511613769  | 0.620717995 | 0.620717995 | -5.507229465 |
| 1438749_at   | -0.033104116 | 3.976352768 | -0.511609749 | 0.620720704 | 0.620720704 | -5.507231394 |
| 1458584_at   | 0.047710413  | 4.064142087 | 0.511524846  | 0.620777894 | 0.620777894 | -5.507272123 |
| 1436956_at   | 0.051639373  | 7.847776123 | 0.511421502  | 0.620847511 | 0.620847511 | -5.507321691 |
| 1431031_at   | -0.039555225 | 6.472040594 | -0.511411845 | 0.620854017 | 0.620854017 | -5.507326323 |
| 1419686_at   | 0.043197094  | 7.644768225 | 0.511404514  | 0.620858955 | 0.620858955 | -5.507329839 |
| 1459058_at   | -0.041628643 | 3.545115527 | -0.511384909 | 0.620872162 | 0.620872162 | -5.507339241 |
| 1431511_at   | -0.042450765 | 3.323960178 | -0.511345044 | 0.620899019 | 0.620899019 | -5.507358358 |
| 1436848_x_at | 0.080178618  | 8.529645451 | 0.511325684  | 0.620912061 | 0.620912061 | -5.507367641 |

|              |              |             |              |             |             |              |
|--------------|--------------|-------------|--------------|-------------|-------------|--------------|
| 1437656_at   | 0.048327786  | 5.242314441 | 0.511244144  | 0.620966995 | 0.620966995 | -5.507406737 |
| 1450755_at   | 0.040802614  | 9.001071214 | 0.511233469  | 0.620974187 | 0.620974187 | -5.507411855 |
| 1435665_at   | 0.05140248   | 3.703116594 | 0.511191812  | 0.621002253 | 0.621002253 | -5.507431826 |
| 1434939_at   | 0.045163474  | 8.37433278  | 0.511177732  | 0.621011739 | 0.621011739 | -5.507438576 |
| 1420592_a_at | 0.046613316  | 10.08305297 | 0.511110785  | 0.621056846 | 0.621056846 | -5.507470667 |
| 1422753_a_at | 0.066385217  | 8.049048386 | 0.511063831  | 0.621088483 | 0.621088483 | -5.507493172 |
| 1449963_at   | -0.040679377 | 3.292907199 | -0.511050838 | 0.621097238 | 0.621097238 | -5.507499399 |
| 1459798_x_at | 0.041032648  | 2.981787137 | 0.511031527  | 0.621110249 | 0.621110249 | -5.507508654 |
| 1422252_a_at | 0.040942989  | 6.886957011 | 0.510994356  | 0.621135296 | 0.621135296 | -5.507526468 |
| 1430209_at   | -0.05389162  | 3.411135769 | -0.510978983 | 0.621145654 | 0.621145654 | -5.507533835 |
| 1459362_at   | -0.038601619 | 3.477891716 | -0.510963623 | 0.621156004 | 0.621156004 | -5.507541195 |
| 1416723_at   | -0.038622354 | 10.8448092  | -0.510922687 | 0.621183588 | 0.621183588 | -5.507560811 |
| 1450126_at   | -0.042581621 | 3.771776519 | -0.510882015 | 0.621210995 | 0.621210995 | -5.507580298 |
| 1428433_at   | -0.044750616 | 8.993090195 | -0.510870959 | 0.621218445 | 0.621218445 | -5.507585595 |
| 1428402_at   | 0.101250881  | 8.949707962 | 0.5108648    | 0.621222595 | 0.621222595 | -5.507588546 |
| 1459257_at   | -0.041667588 | 3.967511191 | -0.510815316 | 0.621255942 | 0.621255942 | -5.507612253 |
| 1436798_at   | -0.048851052 | 7.105978366 | -0.510805308 | 0.621262686 | 0.621262686 | -5.507617047 |
| 1457889_at   | -0.05076923  | 5.354090696 | -0.510782026 | 0.621278375 | 0.621278375 | -5.507628201 |
| 1447466_at   | -0.063863693 | 4.086653536 | -0.510663036 | 0.621358564 | 0.621358564 | -5.507685194 |
| 1450649_at   | 0.03282801   | 11.00327592 | 0.510617024  | 0.621389574 | 0.621389574 | -5.507707229 |
| 1427545_at   | -0.040627204 | 3.521142547 | -0.510597746 | 0.621402567 | 0.621402567 | -5.507716461 |
| 1420375_at   | -0.080960945 | 9.027958284 | -0.510556957 | 0.621430058 | 0.621430058 | -5.507735993 |
| 1429039_s_at | 0.042251469  | 8.467347487 | 0.510542211  | 0.621439996 | 0.621439996 | -5.507743054 |
| 1434208_at   | 0.064959094  | 7.050701337 | 0.510526521  | 0.621450571 | 0.621450571 | -5.507750566 |
| 1416634_at   | -0.034587912 | 9.95838073  | -0.510521493 | 0.62145396  | 0.62145396  | -5.507752974 |
| 1424089_a_at | -0.057012109 | 9.762779297 | -0.51050374  | 0.621465925 | 0.621465925 | -5.507761474 |
| 1455517_at   | 0.045327101  | 6.395853323 | 0.510460069  | 0.62149536  | 0.62149536  | -5.507782382 |
| 1438131_at   | 0.065592535  | 6.822410578 | 0.510455552  | 0.621498404 | 0.621498404 | -5.507784544 |
| 1454912_at   | -0.048362886 | 4.456727346 | -0.510454589 | 0.621499053 | 0.621499053 | -5.507785006 |
| 1444158_at   | -0.073367416 | 8.694342922 | -0.510377439 | 0.621551054 | 0.621551054 | -5.507821938 |
| 1441055_at   | -0.068418383 | 6.293510745 | -0.510332831 | 0.621581123 | 0.621581123 | -5.50784329  |
| 1438390_s_at | 0.139266191  | 11.38077615 | 0.510298553  | 0.621604229 | 0.621604229 | -5.507859696 |
| 1421210_at   | 0.040120961  | 4.090177636 | 0.510274073  | 0.62162073  | 0.62162073  | -5.507871412 |
| 1442565_at   | -0.041120914 | 3.843808726 | -0.510182278 | 0.621682609 | 0.621682609 | -5.507915339 |
| 1448676_at   | 0.045469466  | 4.966420758 | 0.510156678  | 0.621699867 | 0.621699867 | -5.507927589 |
| 1441612_at   | 0.051264339  | 7.05398192  | 0.510155411  | 0.621700721 | 0.621700721 | -5.507928195 |
| 1425944_a_at | -0.04320042  | 5.817486088 | -0.51004848  | 0.621772808 | 0.621772808 | -5.507979354 |
| 1458305_at   | -0.065765609 | 4.838095533 | -0.510031576 | 0.621784204 | 0.621784204 | -5.507987441 |
| 1416215_at   | -0.038242285 | 7.327781472 | -0.51001311  | 0.621796653 | 0.621796653 | -5.507996274 |
| 1428160_at   | -0.047590724 | 6.524154198 | -0.509959988 | 0.621832468 | 0.621832468 | -5.508021684 |
| 1439717_at   | 0.056136478  | 3.596877593 | 0.50990669   | 0.621868401 | 0.621868401 | -5.508047176 |
| 1444588_at   | -0.043106469 | 3.621408773 | -0.509842458 | 0.621911709 | 0.621911709 | -5.508077893 |
| 1432464_a_at | -0.034571558 | 6.01537465  | -0.509824565 | 0.621923773 | 0.621923773 | -5.50808645  |
| 1439456_x_at | -0.061175527 | 10.18216259 | -0.509821722 | 0.62192569  | 0.62192569  | -5.508087809 |
| 1452036_a_at | 0.044825206  | 11.0293096  | 0.509761316  | 0.62196642  | 0.62196642  | -5.508116693 |
| 1424263_at   | -0.041001104 | 7.570454429 | -0.509751046 | 0.621973345 | 0.621973345 | -5.508121604 |
| 1426389_at   | -0.044769914 | 5.269430418 | -0.509735368 | 0.621983916 | 0.621983916 | -5.508129099 |
| 1449722_at   | -0.047358928 | 3.808142097 | -0.509674797 | 0.622024759 | 0.622024759 | -5.508158057 |
| 1417231_at   | 0.050429797  | 4.805784694 | 0.509666569  | 0.622030307 | 0.622030307 | -5.508161991 |
| 1435786_at   | -0.036145947 | 8.048696419 | -0.509616162 | 0.622064297 | 0.622064297 | -5.508186087 |
| 1452887_at   | -0.066613217 | 7.638090505 | -0.509615052 | 0.622065045 | 0.622065045 | -5.508186617 |
| 1432122_at   | -0.049763345 | 5.024469316 | -0.509563694 | 0.622099678 | 0.622099678 | -5.508211165 |
| 1432306_at   | -0.04496547  | 5.603931557 | -0.509458118 | 0.622170875 | 0.622170875 | -5.508261621 |

|              |              |             |              |             |             |              |
|--------------|--------------|-------------|--------------|-------------|-------------|--------------|
| 1435180_at   | -0.042084874 | 6.642665904 | -0.509332829 | 0.622255371 | 0.622255371 | -5.508321485 |
| 1445113_at   | 0.045708523  | 3.348725775 | 0.509301614  | 0.622276423 | 0.622276423 | -5.508336398 |
| 1437048_x_at | 0.043609678  | 7.045371787 | 0.509227916  | 0.62232613  | 0.62232613  | -5.508371603 |
| 1428354_at   | -0.047700936 | 8.080950436 | -0.5092258   | 0.622327557 | 0.622327557 | -5.508372614 |
| 1436567_a_at | 0.04271853   | 10.86034793 | 0.509198148  | 0.622346207 | 0.622346207 | -5.508385822 |
| 1441119_at   | -0.05131272  | 4.458277423 | -0.50918534  | 0.622354846 | 0.622354846 | -5.508391939 |
| 1432939_at   | -0.040970389 | 4.689384412 | -0.509167224 | 0.622367065 | 0.622367065 | -5.508400592 |
| 1432147_at   | 0.035653527  | 4.740523918 | 0.509158963  | 0.622372637 | 0.622372637 | -5.508404537 |
| 1449578_at   | -0.041846844 | 8.322196557 | -0.509131947 | 0.62239086  | 0.62239086  | -5.50841744  |
| 1457912_at   | -0.047344343 | 4.883423972 | -0.509058101 | 0.62244067  | 0.62244067  | -5.508452704 |
| 1435221_at   | 0.04801871   | 8.281714928 | 0.509002566  | 0.62247813  | 0.62247813  | -5.508479222 |
| 1428100_at   | -0.042606764 | 9.927144818 | -0.508947653 | 0.622515173 | 0.622515173 | -5.508505439 |
| 1433352_at   | -0.040046909 | 4.436496084 | -0.508922031 | 0.622532457 | 0.622532457 | -5.508517671 |
| 1430725_at   | -0.039285686 | 6.20063447  | -0.508837615 | 0.622589404 | 0.622589404 | -5.508557968 |
| 1454930_at   | -0.044094262 | 7.779093146 | -0.508804067 | 0.622612036 | 0.622612036 | -5.50857398  |
| 1426842_at   | 0.033072981  | 9.540444677 | 0.508769249  | 0.622635526 | 0.622635526 | -5.508590598 |
| 1454739_at   | 0.045845895  | 9.359418771 | 0.508768332  | 0.622636144 | 0.622636144 | -5.508591036 |
| 1434477_at   | 0.058258241  | 7.55058046  | 0.508747243  | 0.622650372 | 0.622650372 | -5.5086011   |
| 1423756_s_at | 0.052017675  | 12.58456892 | 0.508726638  | 0.622664273 | 0.622664273 | -5.508610934 |
| 1445920_at   | 0.036547612  | 3.663650635 | 0.508670708  | 0.622702007 | 0.622702007 | -5.508637623 |
| 1453905_at   | 0.048113882  | 5.26277467  | 0.508669805  | 0.622702617 | 0.622702617 | -5.508638054 |
| 1438994_at   | -0.047608478 | 3.489851759 | -0.508644919 | 0.622719406 | 0.622719406 | -5.508649929 |
| 1440853_at   | -0.039759824 | 5.623397241 | -0.508642932 | 0.622720747 | 0.622720747 | -5.508650877 |
| 1438347_at   | -0.033317069 | 5.377371576 | -0.508594733 | 0.622753267 | 0.622753267 | -5.508673874 |
| 1458021_at   | 0.051992531  | 4.805840431 | 0.508578859  | 0.622763977 | 0.622763977 | -5.508681447 |
| 1426488_at   | 0.058036192  | 8.720232232 | 0.508539891  | 0.622790269 | 0.622790269 | -5.508700038 |
| 1430820_a_at | 0.059630929  | 8.490807503 | 0.508531248  | 0.622796101 | 0.622796101 | -5.508704161 |
| 1417360_at   | 0.085026941  | 7.946703202 | 0.508507021  | 0.622812448 | 0.622812448 | -5.508715718 |
| 1417372_a_at | 0.043329575  | 9.063634207 | 0.508475092  | 0.622833992 | 0.622833992 | -5.508730948 |
| 1428092_at   | 0.041998453  | 9.535914885 | 0.508472014  | 0.622836069 | 0.622836069 | -5.508732417 |
| 1431945_at   | -0.040128055 | 3.788896335 | -0.508437233 | 0.622859537 | 0.622859537 | -5.508749007 |
| 1444388_at   | 0.033199065  | 4.065051279 | 0.508420126  | 0.622871081 | 0.622871081 | -5.508757166 |
| 1447441_at   | -0.043993454 | 5.7192889   | -0.508369709 | 0.622905101 | 0.622905101 | -5.508781211 |
| 1440464_at   | 0.139266191  | 6.368124952 | 0.508353729  | 0.622915884 | 0.622915884 | -5.508788832 |
| 1450553_at   | 0.062233458  | 3.756807762 | 0.508347224  | 0.622920273 | 0.622920273 | -5.508791934 |
| 1447196_at   | -0.036551703 | 3.270736597 | -0.508335905 | 0.622927912 | 0.622927912 | -5.508797332 |
| 1458055_at   | 0.046559949  | 3.33737675  | 0.508300388  | 0.622951879 | 0.622951879 | -5.508814269 |
| 1440767_at   | -0.035709713 | 3.484618133 | -0.508297642 | 0.622953732 | 0.622953732 | -5.508815578 |
| 1429090_at   | -0.048966958 | 4.737834989 | -0.508276033 | 0.622968314 | 0.622968314 | -5.508825882 |
| 1453727_at   | 0.074971913  | 6.200158873 | 0.508266577  | 0.622974695 | 0.622974695 | -5.508830391 |
| 1448549_a_at | 0.063748165  | 8.086412512 | 0.508243925  | 0.622989981 | 0.622989981 | -5.508841191 |
| 1429742_at   | 0.101352688  | 5.862918204 | 0.508234253  | 0.622996508 | 0.622996508 | -5.508845803 |
| 1427941_at   | 0.033102684  | 8.564184124 | 0.508214313  | 0.623009965 | 0.623009965 | -5.50885531  |
| 1432158_a_at | 0.05552849   | 8.5404804   | 0.508178528  | 0.623034114 | 0.623034114 | -5.508872371 |
| 1427073_at   | -0.054064876 | 6.274048847 | -0.508170321 | 0.623039653 | 0.623039653 | -5.508876283 |
| 1416328_a_at | -0.039714478 | 10.03003342 | -0.508147812 | 0.623054843 | 0.623054843 | -5.508887013 |
| 1440356_at   | 0.040407769  | 5.355562205 | 0.508086537  | 0.623096197 | 0.623096197 | -5.508916222 |
| 1453495_at   | 0.047699624  | 5.143878171 | 0.508082112  | 0.623099183 | 0.623099183 | -5.508918332 |
| 1425986_a_at | 0.050752424  | 5.334303131 | 0.508076255  | 0.623103136 | 0.623103136 | -5.508921123 |
| 1458203_at   | 0.038229806  | 6.755034715 | 0.508040178  | 0.623127484 | 0.623127484 | -5.508938318 |
| 1419159_at   | -0.035119752 | 7.966837297 | -0.508005496 | 0.623150892 | 0.623150892 | -5.508954848 |
| 1438367_x_at | -0.034436247 | 4.069304811 | -0.507976452 | 0.623170494 | 0.623170494 | -5.508968689 |
| 1438017_at   | -0.043764219 | 6.832573038 | -0.507961824 | 0.623180367 | 0.623180367 | -5.508975661 |

|              |              |             |              |             |             |              |
|--------------|--------------|-------------|--------------|-------------|-------------|--------------|
| 1457699_at   | 0.051444216  | 4.455625737 | 0.507914679  | 0.623212188 | 0.623212188 | -5.508998126 |
| 1416292_at   | 0.043349279  | 9.636067806 | 0.507895138  | 0.623225377 | 0.623225377 | -5.509007438 |
| 1422018_at   | -0.046497418 | 7.898828019 | -0.507887058 | 0.623230831 | 0.623230831 | -5.509011288 |
| 1416747_at   | -0.038073338 | 8.581868294 | -0.507823803 | 0.623273526 | 0.623273526 | -5.509041425 |
| 1433304_at   | 0.038370278  | 3.473288359 | 0.507788545  | 0.623297326 | 0.623297326 | -5.509058223 |
| 1458085_at   | -0.047508097 | 6.668801998 | -0.507734715 | 0.623333661 | 0.623333661 | -5.509083866 |
| 1451283_at   | 0.036108552  | 8.959481838 | 0.507677576  | 0.623372232 | 0.623372232 | -5.509111082 |
| 1439650_at   | -0.09408953  | 8.89088129  | -0.507664488 | 0.623381067 | 0.623381067 | -5.509117316 |
| 1450945_at   | -0.052941119 | 7.216507149 | -0.507657548 | 0.623385752 | 0.623385752 | -5.509120621 |
| 1429581_at   | 0.042214797  | 7.805314527 | 0.507645527  | 0.623393866 | 0.623393866 | -5.509126346 |
| 1426880_at   | -0.045765992 | 8.641938552 | -0.507609801 | 0.623417984 | 0.623417984 | -5.509143361 |
| 1449678_at   | -0.057776862 | 6.034032723 | -0.507599192 | 0.623425146 | 0.623425146 | -5.509148413 |
| 1448803_at   | 0.056222185  | 7.859944287 | 0.507497701  | 0.623493662 | 0.623493662 | -5.509196741 |
| 1437223_s_at | -0.042794566 | 11.25261464 | -0.507440272 | 0.623532433 | 0.623532433 | -5.509224084 |
| 1441799_at   | -0.04086769  | 5.404685564 | -0.507434301 | 0.623536464 | 0.623536464 | -5.509226927 |
| 1438238_at   | -0.242535955 | 6.202055748 | -0.507376902 | 0.623575217 | 0.623575217 | -5.509254252 |
| 1426487_a_at | -0.071370546 | 8.106297602 | -0.507363053 | 0.623584567 | 0.623584567 | -5.509260844 |
| 1420548_a_at | 0.04605418   | 6.875201339 | 0.507347445  | 0.623595105 | 0.623595105 | -5.509268274 |
| 1433648_at   | 0.039255014  | 11.04604605 | 0.507339438  | 0.623600511 | 0.623600511 | -5.509272085 |
| 1455592_at   | -0.035983039 | 8.003512052 | -0.507335162 | 0.623603398 | 0.623603398 | -5.509274121 |
| 1425740_at   | -0.048092522 | 5.031567785 | -0.507330103 | 0.623606813 | 0.623606813 | -5.509276528 |
| 1438958_x_at | 0.041009224  | 11.09126438 | 0.507311398  | 0.623619443 | 0.623619443 | -5.509285432 |
| 1446892_at   | 0.046126823  | 6.003990493 | 0.507285499  | 0.623636693 | 0.623636693 | -5.509297759 |
| 1426119_at   | 0.032824765  | 3.461463852 | 0.507285044  | 0.623637236 | 0.623637236 | -5.509297975 |
| 1450904_at   | 0.031591978  | 10.8435472  | 0.507257952  | 0.623655529 | 0.623655529 | -5.50931087  |
| 1453534_at   | -0.04642522  | 5.275189117 | -0.507252937 | 0.623658915 | 0.623658915 | -5.509313256 |
| 1417192_at   | 0.076509695  | 8.53490074  | 0.507184711  | 0.623704982 | 0.623704982 | -5.509345724 |
| 1416439_at   | -0.032155999 | 9.598667166 | -0.507177018 | 0.623710176 | 0.623710176 | -5.509349385 |
| 1438455_at   | 0.058593741  | 7.7586243   | 0.507176675  | 0.623710408 | 0.623710408 | -5.509349548 |
| 1430104_at   | 0.039572444  | 4.932758652 | 0.507110485  | 0.623755102 | 0.623755102 | -5.509381043 |
| 1453970_at   | -0.0580826   | 4.144296108 | -0.507042902 | 0.623800739 | 0.623800739 | -5.509413197 |
| 1439913_at   | 0.046826078  | 5.638933194 | 0.507019498  | 0.623816543 | 0.623816543 | -5.509424331 |
| 1455137_at   | 0.050638475  | 7.698134966 | 0.507002777  | 0.623827835 | 0.623827835 | -5.509432285 |
| 1428124_at   | 0.056797814  | 9.069255802 | 0.506991784  | 0.623835258 | 0.623835258 | -5.509437514 |
| 1454542_at   | 0.039688098  | 5.551178566 | 0.506977073  | 0.623845192 | 0.623845192 | -5.509444512 |
| 1426010_a_at | -0.033752581 | 9.686798133 | -0.506670777 | 0.624052052 | 0.624052052 | -5.509590169 |
| 1445796_at   | -0.038131787 | 5.993578536 | -0.506636357 | 0.6240753   | 0.6240753   | -5.509606532 |
| 1433933_s_at | 0.048957014  | 5.212009135 | 0.50661378   | 0.624090549 | 0.624090549 | -5.509617264 |
| 1435183_at   | -0.053394352 | 8.26840025  | -0.506569754 | 0.624120286 | 0.624120286 | -5.509638191 |
| 1415934_at   | 0.033051376  | 9.419816567 | 0.506497104  | 0.624169359 | 0.624169359 | -5.509672721 |
| 1453095_at   | 0.039451501  | 10.97301321 | 0.506493924  | 0.624171507 | 0.624171507 | -5.509674232 |
| 1419309_at   | -0.09770387  | 9.306834966 | -0.506492339 | 0.624172577 | 0.624172577 | -5.509674985 |
| 1426382_at   | 0.038477074  | 10.13472824 | 0.50645456   | 0.624198096 | 0.624198096 | -5.509692939 |
| 1430796_at   | 0.050797134  | 3.641396726 | 0.506425315  | 0.624217852 | 0.624217852 | -5.509706837 |
| 1429474_at   | -0.047385529 | 4.332110438 | -0.506380888 | 0.624247863 | 0.624247863 | -5.509727947 |
| 1416071_at   | -0.038304806 | 9.396129416 | -0.506327693 | 0.624283797 | 0.624283797 | -5.509753221 |
| 1429452_x_at | 0.113266016  | 7.576272743 | 0.506327541  | 0.6242839   | 0.6242839   | -5.509753294 |
| 1452891_at   | 0.043228733  | 6.333010043 | 0.506301729  | 0.624301337 | 0.624301337 | -5.509765557 |
| 1425333_at   | 0.039927763  | 7.423261967 | 0.506284298  | 0.624313113 | 0.624313113 | -5.509773838 |
| 1453637_at   | -0.045520763 | 4.977242383 | -0.506233396 | 0.6243475   | 0.6243475   | -5.509798018 |
| 1458033_at   | 0.061530617  | 6.622210632 | 0.506232842  | 0.624347875 | 0.624347875 | -5.509798282 |
| 1460559_at   | -0.031050006 | 9.549103121 | -0.506225261 | 0.624352996 | 0.624352996 | -5.509801883 |
| 1433941_at   | -0.039711777 | 8.505957399 | -0.506189017 | 0.624377482 | 0.624377482 | -5.509819099 |



|              |              |             |              |             |             |              |
|--------------|--------------|-------------|--------------|-------------|-------------|--------------|
| 1447118_at   | -0.034195914 | 5.391734431 | -0.506118974 | 0.624424803 | 0.624424803 | -5.509852365 |
| 1431349_at   | 0.037827788  | 4.265964181 | 0.50603499   | 0.624481546 | 0.624481546 | -5.509892248 |
| 1439420_x_at | -0.037425422 | 7.051040637 | -0.506020595 | 0.624491272 | 0.624491272 | -5.509899084 |
| 1436387_at   | 0.056317076  | 5.434680729 | 0.505996065  | 0.624507846 | 0.624507846 | -5.509910731 |
| 1421371_at   | -0.040028295 | 3.441258918 | -0.505977667 | 0.624520277 | 0.624520277 | -5.509919467 |
| 1458452_at   | 0.041193953  | 8.699541617 | 0.505961847  | 0.624530966 | 0.624530966 | -5.509926978 |
| 1455282_x_at | 0.035660072  | 5.064777772 | 0.505955984  | 0.624534928 | 0.624534928 | -5.509929761 |
| 1441167_at   | -0.033167223 | 3.412560776 | -0.505954324 | 0.624536049 | 0.624536049 | -5.509930549 |
| 1435344_at   | 0.030657155  | 8.678585567 | 0.5059316    | 0.624551403 | 0.624551403 | -5.509941338 |
| 1448121_at   | -0.070821387 | 7.46293474  | -0.50589721  | 0.62457464  | 0.62457464  | -5.509957664 |
| 1434432_at   | -0.03919519  | 6.706455501 | -0.505863555 | 0.624597381 | 0.624597381 | -5.50997364  |
| 1458041_at   | -0.037636244 | 4.343858709 | -0.505794846 | 0.624643809 | 0.624643809 | -5.510006254 |
| 1423793_at   | -0.03843103  | 7.444053415 | -0.505776677 | 0.624656087 | 0.624656087 | -5.510014878 |
| 1449280_at   | 0.037649279  | 3.462743068 | 0.505759415  | 0.624667752 | 0.624667752 | -5.510023071 |
| 1454814_s_at | 0.038980772  | 9.203687651 | 0.505740218  | 0.624680724 | 0.624680724 | -5.510032181 |
| 1446401_at   | 0.045479522  | 3.529186583 | 0.505735435  | 0.624683957 | 0.624683957 | -5.510034452 |
| 1452501_at   | -0.041932217 | 4.394242452 | -0.505726822 | 0.624689777 | 0.624689777 | -5.510038539 |
| 1421577_at   | 0.043454497  | 5.170911209 | 0.505638452  | 0.624749495 | 0.624749495 | -5.510080474 |
| 1423003_at   | 0.040622276  | 4.055685498 | 0.505564142  | 0.624799715 | 0.624799715 | -5.510115731 |
| 1456328_at   | -0.080191524 | 4.445401473 | -0.505407299 | 0.624905717 | 0.624905717 | -5.510190131 |
| 1424745_at   | -0.030006204 | 7.385439194 | -0.505405589 | 0.624906873 | 0.624906873 | -5.510190942 |
| 1448914_a_at | 0.046574353  | 7.223698823 | 0.505388958  | 0.624918114 | 0.624918114 | -5.51019883  |
| 1437829_s_at | -0.046014441 | 8.012577141 | -0.505387462 | 0.624919125 | 0.624919125 | -5.51019954  |
| 1440730_at   | 0.035592176  | 3.497865922 | 0.505286622  | 0.624987283 | 0.624987283 | -5.510247361 |
| 1452389_at   | 0.037927833  | 3.729815361 | 0.505212703  | 0.625037248 | 0.625037248 | -5.51028241  |
| 1457616_at   | 0.043021194  | 4.684068688 | 0.505184984  | 0.625055984 | 0.625055984 | -5.510295552 |
| 1456522_at   | -0.031566314 | 3.499760082 | -0.50517533  | 0.62506251  | 0.62506251  | -5.510300129 |
| 1437175_at   | 0.033244508  | 8.807841641 | 0.505113473  | 0.625104324 | 0.625104324 | -5.510329453 |
| 1437923_at   | 0.066052425  | 9.542838423 | 0.505085     | 0.625123572 | 0.625123572 | -5.51034295  |
| 1449325_at   | 0.041981351  | 8.131908601 | 0.505054906  | 0.625143915 | 0.625143915 | -5.510357214 |
| 1456572_x_at | 0.043128035  | 5.1516553   | 0.505039257  | 0.625154494 | 0.625154494 | -5.510364631 |
| 1455130_at   | 0.04546703   | 8.053418125 | 0.505019749  | 0.625167682 | 0.625167682 | -5.510373878 |
| 1450252_at   | 0.044205994  | 4.610438943 | 0.505003038  | 0.625178979 | 0.625178979 | -5.510381797 |
| 1459342_at   | 0.035092547  | 3.444265191 | 0.505001276  | 0.62518017  | 0.62518017  | -5.510382633 |
| 1439393_x_at | -0.04226137  | 9.776149459 | -0.504947319 | 0.625216647 | 0.625216647 | -5.510408203 |
| 1435439_at   | -0.03693411  | 8.59139993  | -0.504909455 | 0.625242246 | 0.625242246 | -5.510426146 |
| 1458032_at   | -0.054948653 | 4.047946041 | -0.504883908 | 0.625259517 | 0.625259517 | -5.510438251 |
| 1423299_at   | -0.037912017 | 9.900764898 | -0.50484289  | 0.625287248 | 0.625287248 | -5.510457686 |
| 1420471_at   | 0.04117559   | 5.142456557 | 0.504798923  | 0.625316974 | 0.625316974 | -5.510478516 |
| 1421920_a_at | -0.042890022 | 3.438710678 | -0.504774132 | 0.625333736 | 0.625333736 | -5.510490261 |
| 1454163_at   | 0.036654583  | 3.719664201 | 0.504734603  | 0.625360462 | 0.625360462 | -5.510508986 |
| 1446267_at   | 0.036639737  | 3.373736583 | 0.504724639  | 0.625367199 | 0.625367199 | -5.510513706 |
| 1453636_at   | -0.041049606 | 4.563848277 | -0.504711759 | 0.625375907 | 0.625375907 | -5.510519807 |
| 1421911_at   | -0.037286623 | 5.658808299 | -0.504635578 | 0.625427417 | 0.625427417 | -5.51055589  |
| 1454915_at   | -0.044416733 | 8.559524482 | -0.5045827   | 0.625463172 | 0.625463172 | -5.510580933 |
| 1455996_x_at | -0.049232028 | 4.136552583 | -0.504458924 | 0.62554687  | 0.62554687  | -5.510639542 |
| 1455340_at   | -0.037251338 | 7.438448724 | -0.504458211 | 0.625547352 | 0.625547352 | -5.51063988  |
| 1417398_at   | -0.038788423 | 8.801172645 | -0.504433517 | 0.625564051 | 0.625564051 | -5.510651571 |
| 1415742_at   | -0.033802512 | 8.258993904 | -0.504415317 | 0.625576359 | 0.625576359 | -5.510660187 |
| 1449045_at   | 0.0430452    | 7.712983938 | 0.504403233  | 0.62558453  | 0.62558453  | -5.510665908 |
| 1449206_at   | -0.060603027 | 5.772377745 | -0.504333792 | 0.625631491 | 0.625631491 | -5.510698779 |
| 1453832_at   | -0.035978095 | 3.589299258 | -0.504317886 | 0.625642248 | 0.625642248 | -5.510706308 |
| 1420132_s_at | 0.044062414  | 4.314689104 | 0.504312744  | 0.625645725 | 0.625645725 | -5.510708742 |

|              |              |             |              |             |             |              |
|--------------|--------------|-------------|--------------|-------------|-------------|--------------|
| 1457721_at   | -0.03771543  | 4.43488988  | -0.504275437 | 0.625670955 | 0.625670955 | -5.5107264   |
| 1437720_at   | -0.031593873 | 6.465624447 | -0.504241778 | 0.625693719 | 0.625693719 | -5.51074233  |
| 1426733_at   | -0.0382672   | 8.076874586 | -0.504183637 | 0.62573304  | 0.62573304  | -5.510769844 |
| 1417039_a_at | -0.042160273 | 10.49858096 | -0.504157598 | 0.625750652 | 0.625750652 | -5.510782167 |
| 1416717_at   | 0.037998505  | 3.293429968 | 0.504109167  | 0.625783408 | 0.625783408 | -5.510805082 |
| 1455391_at   | 0.039034276  | 7.443362353 | 0.504093873  | 0.625793753 | 0.625793753 | -5.510812319 |
| 1443229_at   | 0.044445151  | 5.348013294 | 0.504044151  | 0.625827383 | 0.625827383 | -5.510835843 |
| 1426014_a_at | -0.033255737 | 4.57337318  | -0.504036838 | 0.625832329 | 0.625832329 | -5.510839302 |
| 1430488_at   | -0.032803865 | 4.393180785 | -0.50398096  | 0.625870125 | 0.625870125 | -5.510865736 |
| 1422674_s_at | -0.051018055 | 4.280920477 | -0.503964656 | 0.625881153 | 0.625881153 | -5.510873448 |
| 1434197_at   | 0.037587944  | 7.89988215  | 0.503926853  | 0.625906724 | 0.625906724 | -5.510891329 |
| 1431877_a_at | 0.032338287  | 6.510898396 | 0.503915654  | 0.625914299 | 0.625914299 | -5.510896626 |
| 1424886_at   | -0.038679097 | 11.15827993 | -0.503880443 | 0.625938117 | 0.625938117 | -5.510913279 |
| 1448749_at   | 0.049493199  | 5.657509476 | 0.503830318  | 0.625972024 | 0.625972024 | -5.510936984 |
| 1423198_a_at | 0.049708992  | 8.231989986 | 0.50377174   | 0.62601165  | 0.62601165  | -5.510964685 |
| 1460309_at   | -0.043767956 | 4.204937724 | -0.503766777 | 0.626015007 | 0.626015007 | -5.510967031 |
| 1424984_at   | -0.032118938 | 6.577007889 | -0.503709188 | 0.626053966 | 0.626053966 | -5.510994261 |
| 1448381_at   | 0.041102659  | 5.508922554 | 0.503700134  | 0.626060091 | 0.626060091 | -5.510998541 |
| 1443917_at   | 0.047941999  | 5.457404647 | 0.503680647  | 0.626073274 | 0.626073274 | -5.511007754 |
| 1454133_s_at | 0.052319445  | 3.828779604 | 0.503606314  | 0.626123563 | 0.626123563 | -5.511042894 |
| 1457532_at   | -0.110051857 | 5.859908929 | -0.503497501 | 0.626197182 | 0.626197182 | -5.511094325 |
| 1427822_a_at | 0.038696482  | 3.84054804  | 0.50336338   | 0.626287928 | 0.626287928 | -5.511157703 |
| 1422145_at   | -0.074667542 | 5.417118769 | -0.503308684 | 0.626324938 | 0.626324938 | -5.511183546 |
| 1460483_at   | 0.053321303  | 5.081384748 | 0.503272891  | 0.626349157 | 0.626349157 | -5.511200455 |
| 1446133_at   | 0.093176219  | 4.761775177 | 0.503234511  | 0.626375128 | 0.626375128 | -5.511218586 |
| 1436445_at   | -0.052443157 | 4.753610724 | -0.50322673  | 0.626380393 | 0.626380393 | -5.511222261 |
| 1417459_at   | 0.033850632  | 3.971593646 | 0.503213225  | 0.626389532 | 0.626389532 | -5.51122864  |
| 1429316_at   | 0.032402145  | 3.462430428 | 0.503179663  | 0.626412243 | 0.626412243 | -5.511244493 |
| 1449286_at   | 0.073649175  | 6.876052355 | 0.50314269   | 0.626437263 | 0.626437263 | -5.511261956 |
| 1453858_at   | -0.03279934  | 5.56269879  | -0.50313866  | 0.62643999  | 0.62643999  | -5.511263859 |
| 1435446_a_at | -0.044249358 | 8.140467617 | -0.503137501 | 0.626440775 | 0.626440775 | -5.511264406 |
| 1417906_at   | 0.034367963  | 3.397907301 | 0.503129585  | 0.626446131 | 0.626446131 | -5.511268145 |
| 1432903_at   | -0.042837897 | 4.314170928 | -0.502999176 | 0.626534384 | 0.626534384 | -5.511329727 |
| 1449495_at   | -0.056103263 | 3.810746463 | -0.502964824 | 0.626557633 | 0.626557633 | -5.511345947 |
| 1454223_at   | -0.035924559 | 4.83785456  | -0.502777436 | 0.626684459 | 0.626684459 | -5.511434404 |
| 1450055_at   | -0.049803496 | 5.963119405 | -0.502724702 | 0.626720152 | 0.626720152 | -5.511459291 |
| 1453002_at   | 0.062760183  | 9.302921456 | 0.502722345  | 0.626721748 | 0.626721748 | -5.511460404 |
| 1423919_at   | -0.035397998 | 8.196608082 | -0.502717694 | 0.626724896 | 0.626724896 | -5.511462599 |
| 1456457_at   | -0.03218534  | 5.881574155 | -0.50254187  | 0.626843911 | 0.626843911 | -5.51154556  |
| 1445374_at   | -0.05403035  | 7.315238225 | -0.502525854 | 0.626854753 | 0.626854753 | -5.511553115 |
| 1426481_at   | 0.038384638  | 10.44407761 | 0.502514341  | 0.626862546 | 0.626862546 | -5.511558546 |
| 1416512_at   | 0.045094946  | 7.630633942 | 0.502509503  | 0.626865822 | 0.626865822 | -5.511560829 |
| 1437699_at   | 0.039176163  | 3.69422822  | 0.502508675  | 0.626866382 | 0.626866382 | -5.511561219 |
| 1442427_at   | -0.054269441 | 7.624836534 | -0.502463363 | 0.626897056 | 0.626897056 | -5.511582594 |
| 1424036_at   | 0.033874923  | 9.064089374 | 0.502458778  | 0.62690016  | 0.62690016  | -5.511584756 |
| 1423992_at   | -0.06849474  | 9.998501595 | -0.502439971 | 0.626912891 | 0.626912891 | -5.511593627 |
| 1425957_x_at | 0.035448287  | 3.527240906 | 0.502389172  | 0.626947282 | 0.626947282 | -5.511617587 |
| 1428340_s_at | 0.0523222    | 8.251076349 | 0.502334959  | 0.626983983 | 0.626983983 | -5.511643154 |
| 1455718_at   | -0.060535826 | 4.040947866 | -0.502320221 | 0.626993962 | 0.626993962 | -5.511650104 |
| 1450267_at   | -0.044452911 | 4.799829091 | -0.502311464 | 0.62699989  | 0.62699989  | -5.511654233 |
| 1439525_at   | -0.033594964 | 5.676231768 | -0.502289065 | 0.627015054 | 0.627015054 | -5.511664795 |
| 1446284_at   | -0.097103596 | 4.822653019 | -0.502232799 | 0.627053148 | 0.627053148 | -5.511691326 |
| 1460519_a_at | 0.048416826  | 8.619134429 | 0.502222335  | 0.627060233 | 0.627060233 | -5.511696259 |

|              |              |             |              |             |             |              |
|--------------|--------------|-------------|--------------|-------------|-------------|--------------|
| 1444756_at   | -0.052211416 | 5.061235187 | -0.502162338 | 0.627100854 | 0.627100854 | -5.511724545 |
| 1459944_at   | 0.057104674  | 6.958540969 | 0.502113799  | 0.62713372  | 0.62713372  | -5.511747427 |
| 1446357_at   | -0.050998238 | 6.365511773 | -0.501972061 | 0.627229692 | 0.627229692 | -5.511814231 |
| 1433211_at   | -0.032220023 | 4.053203786 | -0.501920434 | 0.627264652 | 0.627264652 | -5.51183856  |
| 1449263_at   | 0.042987496  | 8.717814952 | 0.501893407  | 0.627282953 | 0.627282953 | -5.511851295 |
| 1431057_a_at | 0.1019531    | 8.404826786 | 0.501891082  | 0.627284528 | 0.627284528 | -5.51185239  |
| 1458667_at   | 0.078580877  | 4.400192615 | 0.501883942  | 0.627289363 | 0.627289363 | -5.511855755 |
| 1441153_at   | -0.042925992 | 8.229599996 | -0.50181844  | 0.62733372  | 0.62733372  | -5.511886616 |
| 1449412_at   | -0.044565773 | 8.923458166 | -0.501745622 | 0.627383033 | 0.627383033 | -5.51192092  |
| 1456923_at   | 0.047398033  | 3.708241066 | 0.501608967  | 0.627475582 | 0.627475582 | -5.511985284 |
| 1451742_a_at | -0.03033647  | 10.44349471 | -0.501606804 | 0.627477047 | 0.627477047 | -5.511986303 |
| 1457815_at   | 0.083910491  | 5.030146575 | 0.501598291  | 0.627482813 | 0.627482813 | -5.511990312 |
| 1448506_at   | -0.038299925 | 3.673622349 | -0.501591495 | 0.627487416 | 0.627487416 | -5.511993512 |
| 1435500_at   | -0.052693051 | 4.98071138  | -0.501589773 | 0.627488582 | 0.627488582 | -5.511994323 |
| 1417875_at   | -0.032167898 | 10.42382027 | -0.501494376 | 0.627553194 | 0.627553194 | -5.512039244 |
| 1431499_at   | -0.039112328 | 3.1825397   | -0.501481701 | 0.627561779 | 0.627561779 | -5.512045212 |
| 1457643_x_at | -0.036232242 | 6.916106815 | -0.501479695 | 0.627563138 | 0.627563138 | -5.512046156 |
| 1439829_at   | -0.047490307 | 4.21307964  | -0.501447875 | 0.62758469  | 0.62758469  | -5.512061137 |
| 1420666_at   | -0.036233405 | 6.387048178 | -0.501444976 | 0.627586654 | 0.627586654 | -5.512062502 |
| 1436292_a_at | 0.032537309  | 12.90213113 | 0.501424671  | 0.627600407 | 0.627600407 | -5.512072061 |
| 1436162_at   | 0.046655623  | 3.687441304 | 0.501414702  | 0.62760716  | 0.62760716  | -5.512076755 |
| 1449338_at   | 0.034490865  | 10.03426979 | 0.501346752  | 0.627653187 | 0.627653187 | -5.512108741 |
| 1428413_at   | 0.053517823  | 7.157873063 | 0.501315261  | 0.627674517 | 0.627674517 | -5.512123564 |
| 1450130_at   | 0.036676167  | 6.607418725 | 0.501257999  | 0.627713307 | 0.627713307 | -5.512150514 |
| 1442909_at   | -0.049439208 | 4.532970076 | -0.501239628 | 0.627725751 | 0.627725751 | -5.51215916  |
| 1459704_at   | 0.040859626  | 7.191842388 | 0.501230858  | 0.627731692 | 0.627731692 | -5.512163287 |
| 1457058_at   | 0.047889433  | 8.894642285 | 0.501150269  | 0.627786285 | 0.627786285 | -5.51220121  |
| 1449572_at   | -0.034966344 | 3.52018983  | -0.501140262 | 0.627793064 | 0.627793064 | -5.512205919 |
| 1434006_at   | -0.035081148 | 7.504407349 | -0.501095491 | 0.627823395 | 0.627823395 | -5.512226984 |
| 1423822_a_at | -0.035701265 | 8.466897566 | -0.501024284 | 0.627871635 | 0.627871635 | -5.512260483 |
| 1419548_at   | -0.034313303 | 7.822808795 | -0.500999094 | 0.627888701 | 0.627888701 | -5.512272333 |
| 1441395_at   | -0.039078068 | 4.515868252 | -0.500981374 | 0.627900707 | 0.627900707 | -5.512280668 |
| 1432352_at   | -0.0392657   | 7.886604781 | -0.500973438 | 0.627906083 | 0.627906083 | -5.512284401 |
| 1446376_at   | 0.061992399  | 6.128035182 | 0.500972006  | 0.627907054 | 0.627907054 | -5.512285075 |
| 1457608_at   | -0.036677134 | 6.048356892 | -0.500944608 | 0.627925616 | 0.627925616 | -5.512297962 |
| 1447105_at   | 0.094670217  | 6.996899376 | 0.500940855  | 0.627928159 | 0.627928159 | -5.512299727 |
| 1433089_at   | 0.032940302  | 3.997745779 | 0.500931064  | 0.627934792 | 0.627934792 | -5.512304332 |
| 1447219_at   | -0.044584728 | 5.792802901 | -0.500929663 | 0.627935741 | 0.627935741 | -5.512304991 |
| 1423783_at   | -0.043733611 | 8.387041319 | -0.500890355 | 0.627962374 | 0.627962374 | -5.512323478 |
| 1441217_at   | -0.038182146 | 7.053964526 | -0.500847531 | 0.627991389 | 0.627991389 | -5.512343618 |
| 1437994_x_at | -0.041187252 | 7.693722644 | -0.500827965 | 0.628004646 | 0.628004646 | -5.512352819 |
| 1449558_at   | 0.032127716  | 5.374305243 | 0.500801654  | 0.628022474 | 0.628022474 | -5.512365191 |
| 1426147_s_at | -0.045323244 | 7.134601717 | -0.500779091 | 0.628037762 | 0.628037762 | -5.512375801 |
| 1425042_s_at | -0.038155082 | 8.814072292 | -0.500716374 | 0.628080258 | 0.628080258 | -5.512405289 |
| 1449577_x_at | 0.110108468  | 8.613957136 | 0.500692851  | 0.628096197 | 0.628096197 | -5.512416348 |
| 1443551_at   | 0.037007316  | 5.427069392 | 0.500691233  | 0.628097294 | 0.628097294 | -5.512417109 |
| 1450519_a_at | -0.066821706 | 8.890109269 | -0.500671681 | 0.628110542 | 0.628110542 | -5.5124263   |
| 1447361_at   | 0.051306436  | 3.679535531 | 0.500664597  | 0.628115342 | 0.628115342 | -5.512429631 |
| 1457922_at   | 0.037653443  | 4.966519456 | 0.50065783   | 0.628119928 | 0.628119928 | -5.512432812 |
| 1451554_a_at | -0.038057709 | 8.737059671 | -0.500647799 | 0.628126725 | 0.628126725 | -5.512437527 |
| 1429992_at   | -0.03768371  | 3.243363339 | -0.500613599 | 0.6281499   | 0.6281499   | -5.512453604 |
| 1427618_at   | -0.055183087 | 4.919123698 | -0.500593638 | 0.628163426 | 0.628163426 | -5.512462986 |
| 1438094_x_at | 0.040463664  | 9.054626943 | 0.500592293  | 0.628164338 | 0.628164338 | -5.512463619 |

|              |              |             |              |             |             |              |
|--------------|--------------|-------------|--------------|-------------|-------------|--------------|
| 1451913_a_at | -0.11622705  | 5.092349622 | -0.500493689 | 0.628231158 | 0.628231158 | -5.512509962 |
| 1454113_at   | -0.046286664 | 3.34045043  | -0.500467837 | 0.628248678 | 0.628248678 | -5.512522111 |
| 1451295_a_at | -0.055935391 | 9.793119125 | -0.500433523 | 0.628271932 | 0.628271932 | -5.512538236 |
| 1434350_at   | -0.033341082 | 6.637338144 | -0.500429612 | 0.628274583 | 0.628274583 | -5.512540073 |
| 1440834_at   | -0.050077965 | 4.867514108 | -0.500413173 | 0.628285724 | 0.628285724 | -5.512547798 |
| 1448097_at   | 0.032854269  | 3.253257723 | 0.500385189  | 0.628304689 | 0.628304689 | -5.512560947 |
| 1440998_at   | -0.034578638 | 7.802833416 | -0.500369864 | 0.628315075 | 0.628315075 | -5.512568147 |
| 1434063_at   | 0.038913849  | 9.216872948 | 0.500345624  | 0.628331503 | 0.628331503 | -5.512579536 |
| 1435634_at   | 0.057393464  | 8.171779547 | 0.500259972  | 0.628389554 | 0.628389554 | -5.512619774 |
| 1445512_at   | -0.052004947 | 7.520827376 | -0.500227069 | 0.628411855 | 0.628411855 | -5.51263523  |
| 1448864_at   | 0.038771231  | 9.465677154 | 0.500208709  | 0.628424299 | 0.628424299 | -5.512643854 |
| 1433324_at   | -0.050399816 | 4.200976499 | -0.500191406 | 0.628436027 | 0.628436027 | -5.512651981 |
| 1423706_a_at | -0.036646703 | 9.4326379   | -0.500156088 | 0.628459965 | 0.628459965 | -5.512668569 |
| 1419974_at   | -0.037930504 | 4.757270778 | -0.50008783  | 0.628506232 | 0.628506232 | -5.512700624 |
| 1435672_at   | -0.04483348  | 6.108148056 | -0.499993879 | 0.628569916 | 0.628569916 | -5.512744739 |
| 1444485_at   | 0.060270239  | 5.977672381 | 0.499993755  | 0.62857     | 0.62857     | -5.512744797 |
| 1459125_at   | 0.035403453  | 3.208964817 | 0.499979034  | 0.628579979 | 0.628579979 | -5.512751709 |
| 1427350_a_at | -0.042097011 | 7.628123172 | -0.499859899 | 0.628660739 | 0.628660739 | -5.512807636 |
| 1435557_at   | -0.07961243  | 7.396356029 | -0.499839985 | 0.62867424  | 0.62867424  | -5.512816984 |
| 1457618_at   | 0.065868328  | 5.332799922 | 0.499824776  | 0.62868455  | 0.62868455  | -5.512824122 |
| 1442774_x_at | 0.037963326  | 5.743258768 | 0.499766704  | 0.628723919 | 0.628723919 | -5.512851377 |
| 1424765_at   | -0.037759819 | 7.639202918 | -0.499739559 | 0.628742322 | 0.628742322 | -5.512864116 |
| 1431138_at   | -0.042166381 | 4.391732379 | -0.499737421 | 0.628743772 | 0.628743772 | -5.51286512  |
| 1441468_at   | -0.038521687 | 4.236911851 | -0.499728253 | 0.628749987 | 0.628749987 | -5.512869422 |
| 1439377_x_at | 0.036311147  | 10.86333434 | 0.499685492  | 0.628778978 | 0.628778978 | -5.512889488 |
| 1429970_at   | -0.045126663 | 5.074166891 | -0.499637269 | 0.628811672 | 0.628811672 | -5.512912115 |
| 1455983_at   | -0.041241519 | 7.824989892 | -0.49954835  | 0.628871961 | 0.628871961 | -5.512953832 |
| 1448759_at   | -0.052443211 | 4.620065595 | -0.499544518 | 0.628874558 | 0.628874558 | -5.51295563  |
| 1438035_at   | 0.071345855  | 4.265621205 | 0.499437837  | 0.628946893 | 0.628946893 | -5.51300567  |
| 1443768_at   | 0.097238288  | 4.793231692 | 0.499425232  | 0.628955441 | 0.628955441 | -5.513011582 |
| 1445244_at   | 0.071087988  | 5.072597129 | 0.499416587  | 0.628961302 | 0.628961302 | -5.513015637 |
| 1438860_a_at | 0.052983154  | 7.574746202 | 0.499406204  | 0.628968343 | 0.628968343 | -5.513020506 |
| 1431305_at   | 0.06412401   | 4.94167968  | 0.49939937   | 0.628972977 | 0.628972977 | -5.513023711 |
| 1459027_at   | -0.03390505  | 4.501928911 | -0.499340507 | 0.629012891 | 0.629012891 | -5.513051316 |
| 1452902_at   | -0.047964851 | 7.729411036 | -0.499337574 | 0.62901488  | 0.62901488  | -5.513052691 |
| 1417075_at   | 0.032956296  | 9.561599439 | 0.499315565  | 0.629029805 | 0.629029805 | -5.513063012 |
| 1424553_at   | -0.045736773 | 5.479182769 | -0.499283603 | 0.629051479 | 0.629051479 | -5.513077998 |
| 1421468_at   | -0.041194776 | 5.629169478 | -0.49927349  | 0.629058337 | 0.629058337 | -5.51308274  |
| 1421389_a_at | 0.047938975  | 7.553977766 | 0.49926741   | 0.62906246  | 0.62906246  | -5.513085591 |
| 1454562_at   | -0.04892889  | 5.159973042 | -0.499133102 | 0.629153541 | 0.629153541 | -5.513148556 |
| 1424642_at   | 0.038555666  | 9.614422697 | 0.499110609  | 0.629168796 | 0.629168796 | -5.513159099 |
| 1455357_x_at | -0.041907693 | 11.75897961 | -0.498992656 | 0.629248792 | 0.629248792 | -5.513214381 |
| 1420492_s_at | 0.038187038  | 3.571663903 | 0.498965045  | 0.629267519 | 0.629267519 | -5.51322732  |
| 1453666_at   | 0.037033423  | 4.121030479 | 0.498958721  | 0.629271808 | 0.629271808 | -5.513230284 |
| 1422847_a_at | 0.051679435  | 8.510562718 | 0.49892885   | 0.629292068 | 0.629292068 | -5.51324428  |
| 1425627_x_at | -0.035156021 | 6.811287543 | -0.498857396 | 0.629340533 | 0.629340533 | -5.513277759 |
| 1418808_at   | -0.040979336 | 5.457515009 | -0.498833795 | 0.629356541 | 0.629356541 | -5.513288816 |
| 1443852_at   | 0.036478513  | 3.317059944 | 0.498721124  | 0.629432967 | 0.629432967 | -5.513341596 |
| 1429462_at   | 0.079359159  | 4.413908731 | 0.498692374  | 0.629452469 | 0.629452469 | -5.513355061 |
| 1458386_at   | -0.040424492 | 4.616975903 | -0.498651689 | 0.629480068 | 0.629480068 | -5.513374116 |
| 1424743_at   | -0.033505812 | 7.487499972 | -0.498640536 | 0.629487633 | 0.629487633 | -5.513379339 |
| 1438400_at   | 0.042337108  | 8.741479748 | 0.498539167  | 0.6295564   | 0.6295564   | -5.513426807 |
| 1424694_at   | 0.039692882  | 7.20911296  | 0.49850556   | 0.629579198 | 0.629579198 | -5.513442542 |

|              |              |             |              |             |             |              |
|--------------|--------------|-------------|--------------|-------------|-------------|--------------|
| 1448837_at   | 0.044051782  | 3.786103105 | 0.49849917   | 0.629583534 | 0.629583534 | -5.513445534 |
| 1434530_at   | 0.044817479  | 9.095129347 | 0.49846823   | 0.629604524 | 0.629604524 | -5.513460019 |
| 1452289_a_at | 0.033730211  | 6.069135438 | 0.498446007  | 0.6296196   | 0.6296196   | -5.513470423 |
| 1430837_a_at | -0.036338922 | 6.12257437  | -0.498431473 | 0.629629461 | 0.629629461 | -5.513477227 |
| 1454455_at   | -0.044628958 | 4.239226522 | -0.498414407 | 0.629641039 | 0.629641039 | -5.513485216 |
| 1456728_x_at | 0.055291113  | 10.19450742 | 0.498375985  | 0.629667106 | 0.629667106 | -5.513503201 |
| 1421474_a_at | -0.050931723 | 6.971130533 | -0.498366072 | 0.629673832 | 0.629673832 | -5.513507841 |
| 1417320_at   | 0.034015345  | 9.375463403 | 0.498234715  | 0.629762955 | 0.629762955 | -5.513569318 |
| 1425440_x_at | 0.046739421  | 3.703256292 | 0.498227858  | 0.629767608 | 0.629767608 | -5.513572527 |
| 1429534_a_at | 0.031468898  | 9.522860827 | 0.498164001  | 0.629810936 | 0.629810936 | -5.513602407 |
| 1440964_s_at | 0.032754994  | 6.782470981 | 0.498163483  | 0.629811287 | 0.629811287 | -5.513602649 |
| 1437781_at   | -0.059064406 | 3.684160124 | -0.498149255 | 0.629820942 | 0.629820942 | -5.513609306 |
| 1446006_at   | -0.043603955 | 5.414439377 | -0.498096111 | 0.629857002 | 0.629857002 | -5.51363417  |
| 1419839_x_at | 0.033383265  | 11.18513212 | 0.497970739  | 0.629942077 | 0.629942077 | -5.513692816 |
| 1457513_at   | -0.033636652 | 6.756530513 | -0.497950824 | 0.629955591 | 0.629955591 | -5.51370213  |
| 1457260_at   | -0.048619386 | 7.333830735 | -0.497897606 | 0.629991706 | 0.629991706 | -5.51372702  |
| 1451241_at   | 0.036728673  | 8.691135665 | 0.49786184   | 0.630015979 | 0.630015979 | -5.513743745 |
| 1457530_at   | -0.049810133 | 4.28061268  | -0.497850885 | 0.630023413 | 0.630023413 | -5.513748868 |
| 1456363_at   | 0.045523676  | 5.692859231 | 0.497811418  | 0.630050197 | 0.630050197 | -5.513767322 |
| 1423734_at   | 0.030914504  | 11.20693371 | 0.49779468   | 0.630061557 | 0.630061557 | -5.513775149 |
| 1430143_at   | -0.04030235  | 4.145067275 | -0.497726821 | 0.630107611 | 0.630107611 | -5.513806875 |
| 1435707_at   | 0.032665963  | 3.788068284 | 0.497669719  | 0.630146366 | 0.630146366 | -5.513833569 |
| 1443809_at   | 0.049070448  | 3.283334749 | 0.497667203  | 0.630148074 | 0.630148074 | -5.513834745 |
| 1455759_a_at | 0.057728424  | 6.705491279 | 0.497571733  | 0.630212873 | 0.630212873 | -5.513879369 |
| 1437253_at   | 0.040554452  | 8.381231925 | 0.497490726  | 0.630267857 | 0.630267857 | -5.513917226 |
| 1432365_a_at | -0.072075846 | 4.444577705 | -0.497471087 | 0.630281187 | 0.630281187 | -5.513926403 |
| 1425384_a_at | 0.05614579   | 7.272670544 | 0.497460529  | 0.630288354 | 0.630288354 | -5.513931337 |
| 1424317_at   | -0.035169685 | 6.440848799 | -0.497435385 | 0.630305422 | 0.630305422 | -5.513943086 |
| 1417126_a_at | 0.041527125  | 12.41634324 | 0.497435217  | 0.630305536 | 0.630305536 | -5.513943164 |
| 1427167_at   | -0.035492089 | 9.658609238 | -0.497401882 | 0.630328164 | 0.630328164 | -5.51395874  |
| 1432745_at   | -0.053695086 | 3.788271804 | -0.497379083 | 0.63034364  | 0.63034364  | -5.513969391 |
| 1423084_at   | -0.042902729 | 3.23974793  | -0.497316402 | 0.630386189 | 0.630386189 | -5.513998674 |
| 1420538_at   | -0.071565426 | 5.10028997  | -0.497216555 | 0.630453971 | 0.630453971 | -5.514045312 |
| 1417185_at   | 0.047286666  | 5.913596112 | 0.497210321  | 0.630458204 | 0.630458204 | -5.514048224 |
| 1419877_x_at | -0.039556808 | 4.966644422 | -0.497201026 | 0.630464514 | 0.630464514 | -5.514052565 |
| 1460660_x_at | 0.031627217  | 9.189140781 | 0.497187648  | 0.630473596 | 0.630473596 | -5.514058813 |
| 1417715_a_at | 0.042993186  | 10.81809908 | 0.497051419  | 0.630566084 | 0.630566084 | -5.514122428 |
| 1429900_at   | -0.058518992 | 4.672964703 | -0.497006539 | 0.630596555 | 0.630596555 | -5.514143382 |
| 1443257_at   | 0.035692154  | 7.056374207 | 0.496977151  | 0.630616508 | 0.630616508 | -5.514157102 |
| 1438337_x_at | 0.033158465  | 3.012140321 | 0.496966752  | 0.630623568 | 0.630623568 | -5.514161956 |
| 1420588_at   | -0.047363439 | 4.324681985 | -0.496961423 | 0.630627187 | 0.630627187 | -5.514164444 |
| 1438265_at   | 0.059457907  | 6.932264294 | 0.49694517   | 0.630638222 | 0.630638222 | -5.514172032 |
| 1419536_a_at | 0.052791525  | 9.186633669 | 0.496870908  | 0.630688645 | 0.630688645 | -5.514206695 |
| 1427068_x_at | 0.034443552  | 7.21661152  | 0.496838331  | 0.630710765 | 0.630710765 | -5.5142219   |
| 1440784_at   | -0.047954297 | 3.430514079 | -0.496748088 | 0.630772043 | 0.630772043 | -5.514264015 |
| 1446349_at   | -0.066557329 | 4.457961607 | -0.496719672 | 0.630791339 | 0.630791339 | -5.514277275 |
| 1417903_at   | -0.050715039 | 5.818688673 | -0.496667348 | 0.630826871 | 0.630826871 | -5.514301689 |
| 1450367_at   | -0.033743198 | 3.44874141  | -0.496638318 | 0.630846584 | 0.630846584 | -5.514315233 |
| 1442103_at   | -0.045333362 | 6.58955083  | -0.496620292 | 0.630858825 | 0.630858825 | -5.514323642 |
| 1434273_at   | 0.034713668  | 7.525357662 | 0.49651638   | 0.630929393 | 0.630929393 | -5.514372115 |
| 1447664_x_at | 0.037492008  | 4.063651881 | 0.496506426  | 0.630936153 | 0.630936153 | -5.514376758 |
| 1443332_at   | 0.056629567  | 5.14341361  | 0.496496102  | 0.630943165 | 0.630943165 | -5.514381574 |
| 1419479_at   | 0.045780151  | 4.292639157 | 0.496351072  | 0.631041664 | 0.631041664 | -5.514449209 |

|              |              |             |              |             |             |              |
|--------------|--------------|-------------|--------------|-------------|-------------|--------------|
| 1460031_at   | 0.039754869  | 4.532368212 | 0.496323192  | 0.6310606   | 0.6310606   | -5.514462209 |
| 1444071_at   | 0.043976145  | 3.681170417 | 0.49631647   | 0.631065166 | 0.631065166 | -5.514465343 |
| 1444522_at   | -0.040880596 | 4.215120151 | -0.49630814  | 0.631070824 | 0.631070824 | -5.514469227 |
| 1423945_a_at | -0.043029127 | 8.564868392 | -0.496254648 | 0.631107156 | 0.631107156 | -5.514494166 |
| 1447792_x_at | -0.049605655 | 3.114969669 | -0.496182678 | 0.631156041 | 0.631156041 | -5.514527716 |
| 1434794_at   | -0.039503812 | 6.722978511 | -0.496154473 | 0.6311752   | 0.6311752   | -5.514540863 |
| 1425520_a_at | -0.039020475 | 6.493216021 | -0.496116801 | 0.631200789 | 0.631200789 | -5.514558422 |
| 1422255_at   | -0.036509841 | 4.236004575 | -0.496029946 | 0.631259789 | 0.631259789 | -5.5145989   |
| 1448252_a_at | 0.031007248  | 13.18232112 | 0.49599516   | 0.631283419 | 0.631283419 | -5.51461511  |
| 1426866_at   | -0.051799959 | 9.249163953 | -0.495993408 | 0.63128461  | 0.63128461  | -5.514615926 |
| 1456684_at   | 0.055626505  | 3.865787691 | 0.49597095   | 0.631299866 | 0.631299866 | -5.514626391 |
| 1433830_at   | 0.040299213  | 10.84730608 | 0.495911881  | 0.631339994 | 0.631339994 | -5.514653913 |
| 1430465_at   | -0.055641048 | 3.552366995 | -0.495892989 | 0.631352829 | 0.631352829 | -5.514662715 |
| 1442858_at   | 0.03583486   | 6.356141093 | 0.495889716  | 0.631355052 | 0.631355052 | -5.514664239 |
| 1423898_a_at | -0.033753156 | 10.75239372 | -0.495854301 | 0.631379112 | 0.631379112 | -5.514680738 |
| 1433264_at   | 0.038434139  | 4.198049818 | 0.49581006   | 0.631409168 | 0.631409168 | -5.514701347 |
| 1452048_at   | -0.032177309 | 9.322400961 | -0.49573626  | 0.631459308 | 0.631459308 | -5.514735721 |
| 1440528_at   | -0.053373354 | 3.757423648 | -0.495716029 | 0.631473053 | 0.631473053 | -5.514745143 |
| 1446095_at   | -0.069471335 | 6.816717571 | -0.495707395 | 0.631478919 | 0.631478919 | -5.514749164 |
| 1428484_at   | 0.054847204  | 8.788189785 | 0.49565722   | 0.63151301  | 0.63151301  | -5.514772531 |
| 1455236_x_at | -0.037268702 | 12.52939787 | -0.495635335 | 0.63152788  | 0.63152788  | -5.514782722 |
| 1429063_s_at | -0.048893983 | 7.497749902 | -0.495632608 | 0.631529733 | 0.631529733 | -5.514783992 |
| 1454977_at   | -0.045499621 | 8.287516013 | -0.495603923 | 0.631549223 | 0.631549223 | -5.514797348 |
| 1438021_at   | -0.072688905 | 5.251402913 | -0.49558767  | 0.631560266 | 0.631560266 | -5.514804916 |
| 1428611_at   | -0.044462922 | 7.140413022 | -0.495540789 | 0.631592121 | 0.631592121 | -5.514826744 |
| 1440039_at   | -0.068606102 | 6.161128864 | -0.495511801 | 0.631611818 | 0.631611818 | -5.514840239 |
| 1447396_at   | -0.047934643 | 4.108708373 | -0.495480284 | 0.631633234 | 0.631633234 | -5.514854911 |
| 1435068_at   | -0.056706119 | 8.184552716 | -0.495474249 | 0.631637334 | 0.631637334 | -5.51485772  |
| 1455043_at   | 0.029918437  | 8.429867208 | 0.495465045  | 0.631643589 | 0.631643589 | -5.514862005 |
| 1458244_at   | 0.03557982   | 3.502799695 | 0.4954084    | 0.63168208  | 0.63168208  | -5.514888372 |
| 1438564_at   | 0.049448044  | 4.236991961 | 0.495386694  | 0.631696831 | 0.631696831 | -5.514898475 |
| 1419258_at   | -0.044784535 | 10.74163136 | -0.495297519 | 0.63175743  | 0.63175743  | -5.514939977 |
| 1418577_at   | -0.048558433 | 7.736900223 | -0.495266966 | 0.631778193 | 0.631778193 | -5.514954195 |
| 1444786_at   | -0.033938743 | 3.23674862  | -0.49526027  | 0.631782743 | 0.631782743 | -5.51495731  |
| 1438294_at   | -0.041998541 | 7.495219251 | -0.495187526 | 0.631832181 | 0.631832181 | -5.514991157 |
| 1454286_at   | -0.038988638 | 7.116475835 | -0.495150272 | 0.631857499 | 0.631857499 | -5.515008489 |
| 1441921_x_at | 0.040071018  | 5.642984149 | 0.495133646  | 0.631868799 | 0.631868799 | -5.515016224 |
| 1452659_at   | 0.0376866    | 11.99466239 | 0.49511032   | 0.631884652 | 0.631884652 | -5.515027075 |
| 1437426_at   | 0.054070293  | 8.40594827  | 0.495057662  | 0.631920441 | 0.631920441 | -5.51505157  |
| 1456819_at   | -0.050612792 | 5.16863763  | -0.495045007 | 0.631929042 | 0.631929042 | -5.515057456 |
| 1444508_s_at | -0.04032664  | 7.446963048 | -0.495036008 | 0.631935158 | 0.631935158 | -5.515061642 |
| 1443952_at   | -0.035810105 | 8.0065647   | -0.495035456 | 0.631935533 | 0.631935533 | -5.515061898 |
| 1419051_at   | 0.043347042  | 4.840493318 | 0.49500894   | 0.631953556 | 0.631953556 | -5.515074232 |
| 1452259_at   | -0.034265389 | 8.703866189 | -0.494952332 | 0.631992032 | 0.631992032 | -5.515100559 |
| 1449521_at   | -0.041721727 | 4.301642063 | -0.49494792  | 0.631995031 | 0.631995031 | -5.51510261  |
| 1425872_at   | -0.030548933 | 4.516468504 | -0.494877516 | 0.632042885 | 0.632042885 | -5.515135349 |
| 1444658_at   | 0.043685082  | 3.933512682 | 0.494832565  | 0.63207344  | 0.63207344  | -5.51515625  |
| 1416500_at   | 0.044223901  | 9.617858341 | 0.494790439  | 0.632102075 | 0.632102075 | -5.515175835 |
| 1454965_at   | 0.046094662  | 8.723157753 | 0.494772278  | 0.63211442  | 0.63211442  | -5.515184278 |
| 1445413_at   | -0.058326257 | 4.222537989 | -0.494768724 | 0.632116836 | 0.632116836 | -5.51518593  |
| 1416558_at   | -0.037426487 | 9.022274417 | -0.494764653 | 0.632119604 | 0.632119604 | -5.515187823 |
| 1457552_at   | 0.039444541  | 7.503640846 | 0.494743021  | 0.632134308 | 0.632134308 | -5.515197879 |
| 1425945_at   | 0.03059872   | 4.383318512 | 0.494690029  | 0.632170331 | 0.632170331 | -5.515222512 |

|              |              |             |              |             |             |              |
|--------------|--------------|-------------|--------------|-------------|-------------|--------------|
| 1433919_at   | 0.110930541  | 9.667781911 | 0.494684502  | 0.632174089 | 0.632174089 | -5.515225081 |
| 1417815_a_at | -0.045033402 | 10.03770812 | -0.494565681 | 0.632254865 | 0.632254865 | -5.515280304 |
| 1421073_a_at | -0.049490857 | 3.662588189 | -0.494555583 | 0.632261562 | 0.632261562 | -5.515284882 |
| 1445597_s_at | -0.056597083 | 7.344372171 | -0.494546073 | 0.632268196 | 0.632268196 | -5.515289416 |
| 1422985_at   | 0.04878218   | 7.824847995 | 0.494507766  | 0.632294239 | 0.632294239 | -5.515307216 |
| 1431309_at   | 0.046604641  | 3.52012316  | 0.494494829  | 0.632303034 | 0.632303034 | -5.515313227 |
| 1448311_at   | -0.040719838 | 8.902180936 | -0.494490461 | 0.632306004 | 0.632306004 | -5.515315257 |
| 1433233_at   | -0.031522191 | 3.728797072 | -0.494438494 | 0.632341335 | 0.632341335 | -5.515339402 |
| 1416461_at   | 0.032866975  | 11.42698711 | 0.494427081  | 0.632349095 | 0.632349095 | -5.515344704 |
| 1447736_at   | 0.037706087  | 3.121289665 | 0.494404714  | 0.632364302 | 0.632364302 | -5.515355095 |
| 1459111_at   | 0.040019376  | 3.443099705 | 0.494397241  | 0.632369382 | 0.632369382 | -5.515358567 |
| 1429952_at   | -0.048558353 | 3.872987668 | -0.494357365 | 0.632396495 | 0.632396495 | -5.515377091 |
| 1459101_at   | 0.072662039  | 4.471700389 | 0.494330283  | 0.632414908 | 0.632414908 | -5.515389671 |
| 1446592_at   | 0.035323897  | 7.874339728 | 0.494263573  | 0.632460267 | 0.632460267 | -5.515420656 |
| 1454169_a_at | 0.03119976   | 3.540518578 | 0.494244848  | 0.632472999 | 0.632472999 | -5.515429352 |
| 1434060_at   | 0.040857562  | 8.479967979 | 0.49423432   | 0.632480158 | 0.632480158 | -5.515434241 |
| 1455052_a_at | 0.039268373  | 9.380426647 | 0.494193198  | 0.632508119 | 0.632508119 | -5.515453339 |
| 1459327_at   | 0.03477221   | 4.942540645 | 0.494153915  | 0.632534831 | 0.632534831 | -5.51547158  |
| 1441650_at   | -0.03314325  | 3.104932978 | -0.494099815 | 0.632571619 | 0.632571619 | -5.5154967   |
| 1455853_x_at | 0.052624178  | 4.188447851 | 0.494087197  | 0.632580199 | 0.632580199 | -5.515502558 |
| 1454784_at   | -0.035359399 | 4.504844125 | -0.494060254 | 0.632598521 | 0.632598521 | -5.515515066 |
| 1450297_at   | -0.049020866 | 3.366305374 | -0.494023924 | 0.632623226 | 0.632623226 | -5.515531932 |
| 1459681_at   | -0.057201156 | 3.735428811 | -0.494015773 | 0.63262877  | 0.63262877  | -5.515535717 |
| 1429204_at   | -0.049591704 | 6.891515253 | -0.494003735 | 0.632636955 | 0.632636955 | -5.515541304 |
| 1440539_at   | 0.060280105  | 3.539890537 | 0.494001335  | 0.632638588 | 0.632638588 | -5.515542419 |
| 1454967_at   | 0.035028229  | 6.929561089 | 0.493995321  | 0.632642677 | 0.632642677 | -5.51554521  |
| 1429512_at   | 0.03062987   | 4.417028023 | 0.493983196  | 0.632650923 | 0.632650923 | -5.515550839 |
| 1422570_at   | 0.03096337   | 7.203743547 | 0.493978686  | 0.63265399  | 0.63265399  | -5.515552932 |
| 1437211_x_at | -0.033430088 | 10.3529207  | -0.493950345 | 0.632673264 | 0.632673264 | -5.515566088 |
| 1423310_at   | -0.099949098 | 8.683548842 | -0.493898782 | 0.63270833  | 0.63270833  | -5.51559002  |
| 1422068_at   | -0.037822684 | 4.921462741 | -0.493797096 | 0.632777487 | 0.632777487 | -5.51563721  |
| 1451400_at   | -0.044123698 | 7.215996371 | -0.493755422 | 0.63280583  | 0.63280583  | -5.515656547 |
| 1416703_at   | 0.034941744  | 9.979387384 | 0.493731846  | 0.632821865 | 0.632821865 | -5.515667485 |
| 1420407_at   | 0.03854974   | 4.970628537 | 0.49369579   | 0.632846389 | 0.632846389 | -5.515684214 |
| 1448305_at   | 0.035012593  | 10.26615397 | 0.493678493  | 0.632858154 | 0.632858154 | -5.515692238 |
| 1433121_at   | 0.052415226  | 3.664543278 | 0.493671035  | 0.632863226 | 0.632863226 | -5.515695698 |
| 1429806_at   | 0.045285658  | 6.547332893 | 0.493670273  | 0.632863744 | 0.632863744 | -5.515696051 |
| 1458390_at   | -0.034974118 | 5.276374242 | -0.49366958  | 0.632864216 | 0.632864216 | -5.515696373 |
| 1458761_at   | -0.036824639 | 3.748343166 | -0.493624313 | 0.632895005 | 0.632895005 | -5.515717372 |
| 1460400_at   | 0.034577271  | 7.948048317 | 0.4936008    | 0.632910998 | 0.632910998 | -5.515728279 |
| 1441035_at   | -0.073260658 | 4.732078108 | -0.493526342 | 0.632961645 | 0.632961645 | -5.515762814 |
| 1455482_at   | -0.045754997 | 8.458165247 | -0.493515825 | 0.632968798 | 0.632968798 | -5.515767691 |
| 1447758_x_at | 0.038095987  | 3.550778544 | 0.493505722  | 0.632975671 | 0.632975671 | -5.515772377 |
| 1456106_x_at | 0.056716809  | 5.022203467 | 0.493472164  | 0.632998498 | 0.632998498 | -5.51578794  |
| 1438366_x_at | 0.052748396  | 8.21224539  | 0.493470282  | 0.632999778 | 0.632999778 | -5.515788812 |
| 1455902_x_at | 0.083410545  | 4.556370508 | 0.493465142  | 0.633003274 | 0.633003274 | -5.515791196 |
| 1449670_x_at | -0.066527311 | 5.34950395  | -0.493390064 | 0.633054347 | 0.633054347 | -5.51582601  |
| 1436730_at   | 0.039242336  | 6.498567637 | 0.493338187  | 0.633089637 | 0.633089637 | -5.515850062 |
| 1419534_at   | -0.047511411 | 3.376245633 | -0.493313322 | 0.633106553 | 0.633106553 | -5.51586159  |
| 1448194_a_at | -0.033174027 | 13.76261524 | -0.493301876 | 0.633114339 | 0.633114339 | -5.515866896 |
| 1448888_at   | 0.041374871  | 7.855271649 | 0.493277858  | 0.633130679 | 0.633130679 | -5.51587803  |
| 1442132_at   | -0.031981058 | 6.619267583 | -0.49324204  | 0.633155046 | 0.633155046 | -5.515894633 |
| 1444656_at   | 0.03383364   | 4.268086183 | 0.493229486  | 0.633163587 | 0.633163587 | -5.515900453 |

|              |              |             |              |             |             |              |
|--------------|--------------|-------------|--------------|-------------|-------------|--------------|
| 1433477_at   | -0.045182704 | 7.775485956 | -0.493194474 | 0.633187407 | 0.633187407 | -5.515916681 |
| 1459703_at   | 0.040939176  | 4.751922849 | 0.493077223  | 0.633267179 | 0.633267179 | -5.51597102  |
| 1430506_at   | 0.046916672  | 4.522474639 | 0.493047256  | 0.633287569 | 0.633287569 | -5.515984906 |
| 1459051_at   | -0.042922269 | 5.495832064 | -0.493044085 | 0.633289726 | 0.633289726 | -5.515986375 |
| 1433058_at   | 0.029819622  | 3.146099158 | 0.493029354  | 0.633299749 | 0.633299749 | -5.515993201 |
| 1458733_at   | -0.047046774 | 4.37063297  | -0.493026553 | 0.633301655 | 0.633301655 | -5.515994499 |
| 1444473_at   | -0.038965976 | 6.159876764 | -0.492973826 | 0.63333753  | 0.63333753  | -5.516018928 |
| 1442239_at   | -0.032101011 | 7.496346142 | -0.492964826 | 0.633343654 | 0.633343654 | -5.516023098 |
| 1441557_at   | 0.065060913  | 5.285334253 | 0.492958302  | 0.633348093 | 0.633348093 | -5.51602612  |
| 1429308_at   | 0.117985697  | 4.772742866 | 0.492877066  | 0.633403369 | 0.633403369 | -5.516063753 |
| 1459520_at   | -0.038032806 | 3.875570417 | -0.492873214 | 0.63340599  | 0.63340599  | -5.516065537 |
| 1460308_a_at | -0.031429074 | 9.550137111 | -0.492862478 | 0.633413296 | 0.633413296 | -5.51607051  |
| 1444259_at   | -0.046914251 | 3.96980905  | -0.49282921  | 0.633435933 | 0.633435933 | -5.516085919 |
| 1458370_at   | 0.041377115  | 8.052371962 | 0.492807541  | 0.633450678 | 0.633450678 | -5.516095955 |
| 1428165_at   | 0.037643373  | 7.795865189 | 0.492784249  | 0.633466528 | 0.633466528 | -5.516106742 |
| 1437989_at   | -0.057180953 | 4.752488722 | -0.492764585 | 0.633479909 | 0.633479909 | -5.516115849 |
| 1448218_s_at | -0.048844489 | 11.03157085 | -0.492712306 | 0.633515485 | 0.633515485 | -5.516140059 |
| 1440860_at   | 0.060675185  | 7.753067732 | 0.492707489  | 0.633518763 | 0.633518763 | -5.51614229  |
| 1452290_at   | -0.032836309 | 8.423204685 | -0.492663359 | 0.633548794 | 0.633548794 | -5.516162724 |
| 1460446_at   | 0.048232844  | 8.672373832 | 0.492631205  | 0.633570677 | 0.633570677 | -5.516177611 |
| 1450513_at   | -0.042317053 | 4.768325791 | -0.49261078  | 0.633584576 | 0.633584576 | -5.516187068 |
| 1446567_at   | -0.048797806 | 3.70639781  | -0.492588742 | 0.633599575 | 0.633599575 | -5.516197271 |
| 1418592_at   | 0.049901351  | 6.31813759  | 0.492464038  | 0.633684445 | 0.633684445 | -5.516254996 |
| 1425762_a_at | 0.050165382  | 6.876949913 | 0.492455567  | 0.63369021  | 0.63369021  | -5.516258917 |
| 1448923_at   | -0.034766555 | 8.552410981 | -0.492445666 | 0.633696949 | 0.633696949 | -5.516263499 |
| 1434079_s_at | 0.032255319  | 9.822162948 | 0.492249002  | 0.633830807 | 0.633830807 | -5.516354504 |
| 1459384_at   | -0.0554804   | 4.546401561 | -0.492248751 | 0.633830978 | 0.633830978 | -5.51635462  |
| 1432225_at   | -0.051979042 | 3.877971388 | -0.49223     | 0.633843741 | 0.633843741 | -5.516363295 |
| 1427469_at   | 0.064511949  | 8.929260499 | 0.492226943  | 0.633845822 | 0.633845822 | -5.516364709 |
| 1424069_at   | -0.039250212 | 8.489846859 | -0.492200357 | 0.63386392  | 0.63386392  | -5.516377009 |
| 1430883_at   | -0.033642456 | 3.780785425 | -0.492130841 | 0.63391124  | 0.63391124  | -5.516409165 |
| 1455270_at   | -0.039105395 | 5.849027988 | -0.492102864 | 0.633930284 | 0.633930284 | -5.516422106 |
| 1452552_at   | -0.033123798 | 3.60649165  | -0.492027093 | 0.633981865 | 0.633981865 | -5.516457149 |
| 1460717_at   | 0.03632352   | 7.153487004 | 0.491864043  | 0.634092868 | 0.634092868 | -5.516532541 |
| 1423675_at   | -0.037792023 | 8.719402141 | -0.491796568 | 0.634138806 | 0.634138806 | -5.516563733 |
| 1441847_at   | 0.094500263  | 5.068350312 | 0.491749853  | 0.634170612 | 0.634170612 | -5.516585327 |
| 1449118_at   | 0.034102804  | 8.048967384 | 0.491713929  | 0.634195071 | 0.634195071 | -5.516601931 |
| 1443357_at   | 0.031174929  | 3.660425788 | 0.491560035  | 0.634299858 | 0.634299858 | -5.516673047 |
| 1429747_at   | -0.055660082 | 4.402433201 | -0.491517688 | 0.634328693 | 0.634328693 | -5.516692612 |
| 1441562_at   | 0.034841614  | 3.643546437 | 0.491512508  | 0.634332221 | 0.634332221 | -5.516695005 |
| 1445196_at   | -0.03438908  | 3.66246391  | -0.491504082 | 0.634337958 | 0.634337958 | -5.516698898 |
| 1432557_at   | -0.043308758 | 5.132393164 | -0.491418788 | 0.63439604  | 0.63439604  | -5.5167383   |
| 1440639_at   | 0.035431694  | 5.754624772 | 0.491412635  | 0.63440023  | 0.63440023  | -5.516741142 |
| 1447861_x_at | -0.054068527 | 7.665581493 | -0.49140944  | 0.634402406 | 0.634402406 | -5.516742618 |
| 1440753_at   | 0.077267727  | 4.197628638 | 0.491386842  | 0.634417795 | 0.634417795 | -5.516753056 |
| 1436351_at   | 0.039575036  | 8.300321008 | 0.49134848   | 0.634443919 | 0.634443919 | -5.516770774 |
| 1415793_at   | 0.068425705  | 7.998247968 | 0.491222458  | 0.634529744 | 0.634529744 | -5.516828971 |
| 1445780_at   | -0.054860117 | 3.754925627 | -0.491211882 | 0.634536946 | 0.634536946 | -5.516833854 |
| 1455620_at   | 0.050716893  | 4.606413613 | 0.491161305  | 0.634571392 | 0.634571392 | -5.516857207 |
| 1438770_at   | 0.039471805  | 4.504664652 | 0.491125446  | 0.634595816 | 0.634595816 | -5.516873762 |
| 1423874_at   | -0.059403209 | 5.589411345 | -0.491085019 | 0.63462335  | 0.63462335  | -5.516892425 |
| 1419899_at   | 0.036606839  | 6.57018389  | 0.491044837  | 0.634650718 | 0.634650718 | -5.516910973 |
| 1455372_at   | -0.050290165 | 5.546658926 | -0.491043814 | 0.634651415 | 0.634651415 | -5.516911445 |



|              |              |             |              |             |             |              |
|--------------|--------------|-------------|--------------|-------------|-------------|--------------|
| 1422481_at   | 0.195110743  | 6.468657241 | 0.491037694  | 0.634655583 | 0.634655583 | -5.51691427  |
| 1454399_at   | 0.047149269  | 3.302938807 | 0.491024823  | 0.63466435  | 0.63466435  | -5.516920211 |
| 1455449_at   | 0.0527824    | 4.445643933 | 0.491023907  | 0.634664974 | 0.634664974 | -5.516920633 |
| 1423074_at   | -0.039956133 | 8.645571635 | -0.490963228 | 0.634706304 | 0.634706304 | -5.516948639 |
| 1419618_at   | 0.052158014  | 5.843991675 | 0.490952544  | 0.634713581 | 0.634713581 | -5.51695357  |
| 1420248_at   | 0.034878524  | 3.323001269 | 0.490845696  | 0.634786363 | 0.634786363 | -5.517002876 |
| 1436250_at   | 0.052009353  | 4.768108847 | 0.490810503  | 0.634810336 | 0.634810336 | -5.517019114 |
| 1435122_x_at | 0.03724498   | 9.516097158 | 0.490725027  | 0.634868563 | 0.634868563 | -5.517058547 |
| 1451682_at   | -0.046601765 | 4.32984947  | -0.490687783 | 0.634893935 | 0.634893935 | -5.517075727 |
| 1434305_at   | 0.047162141  | 8.690127381 | 0.490641432  | 0.634925512 | 0.634925512 | -5.517097107 |
| 1448821_at   | -0.032325815 | 3.734385615 | -0.490634085 | 0.634930517 | 0.634930517 | -5.517100495 |
| 1425006_a_at | 0.032809489  | 8.419238235 | 0.49061553   | 0.634943158 | 0.634943158 | -5.517109053 |
| 1453003_at   | -0.062416048 | 7.299247697 | -0.49060328  | 0.634951503 | 0.634951503 | -5.517114703 |
| 1419433_at   | 0.039929626  | 6.623896832 | 0.490499668  | 0.635022093 | 0.635022093 | -5.517162484 |
| 1441930_x_at | -0.053902963 | 7.726938003 | -0.490476985 | 0.635037548 | 0.635037548 | -5.517172942 |
| 1452710_at   | 0.033738613  | 7.790356808 | 0.490375821  | 0.635106474 | 0.635106474 | -5.517219583 |
| 1443855_at   | 0.047535486  | 3.787296331 | 0.490356638  | 0.635119544 | 0.635119544 | -5.517228426 |
| 1424433_at   | 0.066853139  | 7.555063783 | 0.490349174  | 0.63512463  | 0.63512463  | -5.517231866 |
| 1433438_x_at | -0.053374397 | 3.476312601 | -0.49030769  | 0.635152897 | 0.635152897 | -5.517250989 |
| 1455121_at   | -0.058794351 | 6.72704146  | -0.49021464  | 0.6352163   | 0.6352163   | -5.517293874 |
| 1447366_at   | 0.039221631  | 3.600953311 | 0.490197912  | 0.635227699 | 0.635227699 | -5.517301584 |
| 1456559_at   | 0.038879871  | 4.121866948 | 0.490143687  | 0.635264649 | 0.635264649 | -5.517326571 |
| 1428799_at   | -0.055497811 | 7.031472297 | -0.490105609 | 0.635290597 | 0.635290597 | -5.517344116 |
| 1429427_s_at | -0.086829863 | 7.436116033 | -0.4899907   | 0.635368905 | 0.635368905 | -5.517397055 |
| 1459844_at   | 0.031391064  | 3.537586362 | 0.489958893  | 0.635390581 | 0.635390581 | -5.517411707 |
| 1447154_at   | -0.040380456 | 3.946920445 | -0.48991136  | 0.635422975 | 0.635422975 | -5.5174336   |
| 1417559_at   | -0.03067285  | 9.706917907 | -0.489879725 | 0.635444535 | 0.635444535 | -5.51744817  |
| 1454389_at   | -0.041268981 | 4.603692686 | -0.489840313 | 0.635471397 | 0.635471397 | -5.517466321 |
| 1454333_at   | -0.059344834 | 3.722549927 | -0.48983667  | 0.635473879 | 0.635473879 | -5.517467999 |
| 1458847_at   | 0.078049907  | 7.274945827 | 0.489825687  | 0.635481365 | 0.635481365 | -5.517473056 |
| 1457466_at   | 0.035857413  | 5.71742896  | 0.489819553  | 0.635485545 | 0.635485545 | -5.517475881 |
| 1436549_a_at | -0.040010061 | 10.41141788 | -0.489788951 | 0.635506402 | 0.635506402 | -5.517489973 |
| 1451288_s_at | 0.029535103  | 6.780338827 | 0.489749535  | 0.635533268 | 0.635533268 | -5.517508122 |
| 1452140_at   | 0.040621253  | 7.781525464 | 0.489744128  | 0.635536953 | 0.635536953 | -5.517510612 |
| 1416052_at   | 0.039585308  | 9.37722074  | 0.489686339  | 0.635576341 | 0.635576341 | -5.517537218 |
| 1433657_at   | 0.043172899  | 6.00508717  | 0.48965475   | 0.635597873 | 0.635597873 | -5.517551761 |
| 1416113_at   | -0.038578768 | 9.156862419 | -0.489613714 | 0.635625843 | 0.635625843 | -5.517570651 |
| 1439674_at   | -0.039322429 | 6.206389674 | -0.489607569 | 0.635630032 | 0.635630032 | -5.517573479 |
| 1450188_s_at | -0.038889592 | 3.65109085  | -0.489603879 | 0.635632548 | 0.635632548 | -5.517575178 |
| 1459546_s_at | 0.071855112  | 6.911425085 | 0.489592687  | 0.635640176 | 0.635640176 | -5.51758033  |
| 1459500_at   | -0.064733409 | 3.647742508 | -0.489570109 | 0.635655567 | 0.635655567 | -5.517590722 |
| 1418948_at   | -0.063977748 | 4.268436892 | -0.489497939 | 0.635704762 | 0.635704762 | -5.517623938 |
| 1457286_at   | -0.032530235 | 5.724694906 | -0.489484088 | 0.635714203 | 0.635714203 | -5.517630312 |
| 1452073_at   | 0.036705564  | 8.276558131 | 0.489481593  | 0.635715904 | 0.635715904 | -5.517631461 |
| 1426677_at   | 0.034818301  | 11.10152898 | 0.489455969  | 0.635733371 | 0.635733371 | -5.517643252 |
| 1437883_s_at | -0.069403554 | 7.491406486 | -0.489414531 | 0.635761619 | 0.635761619 | -5.517662321 |
| 1423766_at   | -0.034478898 | 8.981002264 | -0.489372009 | 0.635790607 | 0.635790607 | -5.517681886 |
| 1417348_at   | -0.037681002 | 9.072181207 | -0.489253046 | 0.635871708 | 0.635871708 | -5.517736615 |
| 1456448_at   | -0.071621914 | 5.030533135 | -0.489198968 | 0.635908577 | 0.635908577 | -5.517761489 |
| 1424348_at   | 0.045613112  | 9.148470688 | 0.489168147  | 0.63592959  | 0.63592959  | -5.517775665 |
| 1451623_at   | 0.059451526  | 6.559879784 | 0.489106172  | 0.635971845 | 0.635971845 | -5.517804167 |
| 1454419_at   | -0.056782408 | 4.836992236 | -0.489096097 | 0.635978714 | 0.635978714 | -5.5178088   |
| 1433499_at   | -0.056418615 | 7.072901883 | -0.489094959 | 0.63597949  | 0.63597949  | -5.517809323 |

|              |              |             |              |             |             |              |
|--------------|--------------|-------------|--------------|-------------|-------------|--------------|
| 1451727_at   | 0.03402018   | 8.333709677 | 0.48903294   | 0.636021776 | 0.636021776 | -5.517837841 |
| 1428377_at   | 0.03848561   | 6.750104411 | 0.48902982   | 0.636023904 | 0.636023904 | -5.517839276 |
| 1458291_at   | -0.058546545 | 4.1492118   | -0.488967407 | 0.636066646 | 0.636066646 | -5.517867971 |
| 1449348_at   | -0.055299773 | 8.599171378 | -0.488964645 | 0.636068343 | 0.636068343 | -5.517869241 |
| 1417431_a_at | -0.051627184 | 6.890153299 | -0.488895156 | 0.636115726 | 0.636115726 | -5.517901186 |
| 1450721_at   | 0.036303548  | 10.57647299 | 0.488891023  | 0.636118545 | 0.636118545 | -5.517903086 |
| 1454372_at   | -0.033431588 | 3.71586541  | -0.488867956 | 0.636134274 | 0.636134274 | -5.517913689 |
| 1435506_at   | 0.034372304  | 4.238914589 | 0.488850176  | 0.636146398 | 0.636146398 | -5.517921861 |
| 1449753_at   | -0.039188046 | 3.505639446 | -0.488767337 | 0.636202887 | 0.636202887 | -5.517959934 |
| 1444997_at   | 0.044757545  | 4.732978068 | 0.488761633  | 0.636206777 | 0.636206777 | -5.517962556 |
| 1422996_at   | 0.040769722  | 4.994172435 | 0.488727109  | 0.63623032  | 0.63623032  | -5.517978421 |
| 1447802_x_at | 0.037446864  | 4.319702374 | 0.488680306  | 0.636262238 | 0.636262238 | -5.517999927 |
| 1420214_at   | -0.035063118 | 3.722852397 | -0.488679318 | 0.636262912 | 0.636262912 | -5.518000382 |
| 1444391_at   | 0.047715248  | 4.58357013  | 0.488662075  | 0.636274671 | 0.636274671 | -5.518008304 |
| 1426304_x_at | 0.035534877  | 6.969204053 | 0.488599893  | 0.636317078 | 0.636317078 | -5.518036874 |
| 1416544_at   | 0.036816749  | 10.17122428 | 0.488581724  | 0.63632947  | 0.63632947  | -5.518045221 |
| 1459821_x_at | 0.035050897  | 3.713550068 | 0.488522158  | 0.636370094 | 0.636370094 | -5.518072583 |
| 1460671_at   | 0.031705809  | 11.68239239 | 0.488501543  | 0.636384154 | 0.636384154 | -5.518082053 |
| 1427000_at   | -0.039589601 | 3.310164102 | -0.488492896 | 0.636390051 | 0.636390051 | -5.518086025 |
| 1426868_x_at | -0.042626384 | 5.589108911 | -0.48846499  | 0.636409084 | 0.636409084 | -5.518098842 |
| 1430824_at   | -0.039543571 | 3.603907542 | -0.48846386  | 0.636409855 | 0.636409855 | -5.518099361 |
| 1426927_at   | -0.036246998 | 4.676584113 | -0.488438516 | 0.636427141 | 0.636427141 | -5.518111001 |
| 1459922_at   | -0.033923884 | 6.59983598  | -0.488382102 | 0.636465618 | 0.636465618 | -5.518136909 |
| 1454337_at   | 0.042053466  | 3.778442837 | 0.488368203  | 0.636475099 | 0.636475099 | -5.518143292 |
| 1423646_at   | 0.044263478  | 8.14574668  | 0.488365379  | 0.636477025 | 0.636477025 | -5.518144589 |
| 1457040_at   | 0.071070543  | 8.370750876 | 0.488328374  | 0.636502266 | 0.636502266 | -5.518161581 |
| 1439416_x_at | -0.042267066 | 3.263022947 | -0.488308263 | 0.636515983 | 0.636515983 | -5.518170815 |
| 1429383_at   | 0.037965545  | 9.473652983 | 0.488292001  | 0.636527076 | 0.636527076 | -5.518178282 |
| 1432271_a_at | 0.038291094  | 9.507011112 | 0.488278731  | 0.636536127 | 0.636536127 | -5.518184375 |
| 1457490_at   | -0.038732409 | 3.484089303 | -0.48821358  | 0.636580568 | 0.636580568 | -5.518214286 |
| 1454437_at   | -0.046106462 | 3.879521972 | -0.488180131 | 0.636603385 | 0.636603385 | -5.518229641 |
| 1428360_x_at | 0.02951173   | 11.38204068 | 0.488144025  | 0.636628015 | 0.636628015 | -5.518246215 |
| 1451985_at   | 0.035717408  | 7.753010938 | 0.488067095  | 0.636680494 | 0.636680494 | -5.518281524 |
| 1425806_a_at | 0.038097911  | 8.367048391 | 0.488014022  | 0.6367167   | 0.6367167   | -5.51830588  |
| 1416291_at   | 0.030864666  | 10.15898205 | 0.487990531  | 0.636732725 | 0.636732725 | -5.51831666  |
| 1436326_at   | 0.070126229  | 6.017065113 | 0.487929916  | 0.636774079 | 0.636774079 | -5.518344473 |
| 1436158_at   | 0.044580849  | 8.324098177 | 0.487917988  | 0.636782217 | 0.636782217 | -5.518349946 |
| 1434126_at   | 0.030934946  | 8.4215064   | 0.487899411  | 0.63679489  | 0.63679489  | -5.518358469 |
| 1435908_at   | -0.040420707 | 6.052954244 | -0.487806016 | 0.63685861  | 0.63685861  | -5.518401314 |
| 1423384_s_at | -0.03821542  | 7.396825942 | -0.487799988 | 0.636862723 | 0.636862723 | -5.518404079 |
| 1442994_at   | 0.054700073  | 3.626283684 | 0.487750049  | 0.636896796 | 0.636896796 | -5.518426985 |
| 1446953_at   | -0.051851454 | 8.781051483 | -0.487683411 | 0.636942264 | 0.636942264 | -5.518457548 |
| 1454793_x_at | 0.071710853  | 10.11008905 | 0.487665487  | 0.636954494 | 0.636954494 | -5.518465767 |
| 1457893_at   | -0.033377048 | 3.332142678 | -0.487652933 | 0.63696306  | 0.63696306  | -5.518471525 |
| 1423266_at   | 0.041188877  | 8.270756018 | 0.487634855  | 0.636975395 | 0.636975395 | -5.518479815 |
| 1454675_at   | -0.03396859  | 9.811020289 | -0.487596777 | 0.637001378 | 0.637001378 | -5.518497275 |
| 1449029_at   | -0.06625446  | 7.611568762 | -0.487582867 | 0.637010869 | 0.637010869 | -5.518503653 |
| 1418646_at   | -0.049437024 | 8.24817118  | -0.487537608 | 0.637041752 | 0.637041752 | -5.518524404 |
| 1460022_at   | -0.047747554 | 4.748899175 | -0.487498644 | 0.637068341 | 0.637068341 | -5.518542267 |
| 1430534_at   | 0.05297343   | 3.783081417 | 0.487442139  | 0.6371069   | 0.6371069   | -5.51856817  |
| 1418225_at   | 0.033688235  | 7.762345188 | 0.487413175  | 0.637126665 | 0.637126665 | -5.518581446 |
| 1444203_at   | -0.036720152 | 3.23388688  | -0.487318438 | 0.637191317 | 0.637191317 | -5.518624866 |
| 1429444_at   | -0.055479071 | 4.985579984 | -0.487146282 | 0.637308811 | 0.637308811 | -5.518703749 |

|              |              |             |              |             |             |              |
|--------------|--------------|-------------|--------------|-------------|-------------|--------------|
| 1419963_at   | -0.039413646 | 5.700148525 | -0.487131247 | 0.637319073 | 0.637319073 | -5.518710637 |
| 1436027_at   | 0.044716222  | 8.265605111 | 0.487083818  | 0.637351444 | 0.637351444 | -5.518732363 |
| 1455974_at   | 0.035784391  | 4.184852131 | 0.487054023  | 0.637371781 | 0.637371781 | -5.518746011 |
| 1437844_x_at | 0.043783418  | 8.503281442 | 0.486926314  | 0.637458951 | 0.637458951 | -5.5188045   |
| 1438732_at   | 0.040006084  | 5.492520293 | 0.486859637  | 0.637504465 | 0.637504465 | -5.518835032 |
| 1419459_a_at | 0.043219204  | 9.666835649 | 0.486848731  | 0.63751191  | 0.63751191  | -5.518840025 |
| 1436524_at   | -0.047213814 | 5.123711819 | -0.486838706 | 0.637518753 | 0.637518753 | -5.518844615 |
| 1449647_at   | -0.037977556 | 3.50508685  | -0.486836123 | 0.637520516 | 0.637520516 | -5.518845798 |
| 1459445_at   | 0.031793378  | 3.724391409 | 0.486771752  | 0.637564459 | 0.637564459 | -5.518875268 |
| 1452898_at   | 0.053898255  | 8.438864058 | 0.486771152  | 0.637564868 | 0.637564868 | -5.518875543 |
| 1433754_at   | 0.048689646  | 10.25328293 | 0.486740849  | 0.637585555 | 0.637585555 | -5.518889415 |
| 1449616_s_at | 0.038039118  | 8.822809416 | 0.486675404  | 0.637630232 | 0.637630232 | -5.518919371 |
| 1458258_at   | -0.04070609  | 3.153736129 | -0.486674439 | 0.637630891 | 0.637630891 | -5.518919813 |
| 1419638_at   | 0.033088056  | 9.035878937 | 0.486634376  | 0.637658241 | 0.637658241 | -5.518938149 |
| 1425617_at   | 0.038118048  | 8.839915639 | 0.486624177  | 0.637665204 | 0.637665204 | -5.518942817 |
| 1430538_at   | 0.029302595  | 10.03962906 | 0.486562127  | 0.637707567 | 0.637707567 | -5.518971214 |
| 1456981_at   | -0.046976678 | 7.225345213 | -0.486557695 | 0.637710593 | 0.637710593 | -5.518973242 |
| 1453024_at   | 0.064910917  | 4.055335903 | 0.486479742  | 0.637763814 | 0.637763814 | -5.51900891  |
| 1438058_s_at | -0.064215983 | 10.98581658 | -0.486474159 | 0.637767627 | 0.637767627 | -5.519011465 |
| 1423730_at   | -0.033750649 | 10.81983427 | -0.486453536 | 0.637781707 | 0.637781707 | -5.519020901 |
| 1454946_at   | 0.055949386  | 5.863490089 | 0.486440979  | 0.63779028  | 0.63779028  | -5.519026645 |
| 1459917_at   | 0.043430364  | 7.714689461 | 0.486437566  | 0.637792611 | 0.637792611 | -5.519028207 |
| 1418075_at   | -0.037123185 | 7.7356163   | -0.486400384 | 0.637817998 | 0.637817998 | -5.519045217 |
| 1438746_at   | 0.041473211  | 3.129130705 | 0.486342901  | 0.637857247 | 0.637857247 | -5.519071512 |
| 1439779_at   | -0.033711888 | 5.411146622 | -0.486317786 | 0.637874395 | 0.637874395 | -5.519082999 |
| 1438491_x_at | 0.093289961  | 6.746860056 | 0.486268482  | 0.637908061 | 0.637908061 | -5.519105549 |
| 1427558_s_at | 0.037138188  | 6.106523612 | 0.486200257  | 0.637954648 | 0.637954648 | -5.51913675  |
| 1438708_x_at | -0.034136312 | 5.948188481 | -0.48617199  | 0.637973951 | 0.637973951 | -5.519149676 |
| 1430744_at   | -0.038462251 | 4.306815691 | -0.486118388 | 0.638010554 | 0.638010554 | -5.519174184 |
| 1428791_at   | -0.043195393 | 8.888102372 | -0.486118357 | 0.638010575 | 0.638010575 | -5.519174198 |
| 1432064_at   | 0.057808802  | 4.523267353 | 0.486100144  | 0.638023013 | 0.638023013 | -5.519182526 |
| 1425840_a_at | 0.060697456  | 8.668369815 | 0.486087416  | 0.638031705 | 0.638031705 | -5.519188345 |
| 1446164_at   | -0.0330047   | 7.38683246  | -0.486083062 | 0.638034678 | 0.638034678 | -5.519190335 |
| 1441828_at   | 0.049415953  | 3.672493153 | 0.486077237  | 0.638038656 | 0.638038656 | -5.519192998 |
| 1428653_x_at | -0.06277179  | 3.2962462   | -0.486074263 | 0.638040686 | 0.638040686 | -5.519194358 |
| 1417036_at   | 0.036759725  | 3.741118594 | 0.486038126  | 0.638065365 | 0.638065365 | -5.519210878 |
| 1440056_at   | -0.064210591 | 4.209257325 | -0.486011347 | 0.638083652 | 0.638083652 | -5.51922312  |
| 1449890_at   | -0.042361001 | 3.289719221 | -0.486004507 | 0.638088324 | 0.638088324 | -5.519226246 |
| 1419463_at   | 0.033387918  | 3.276389357 | 0.48598345   | 0.638102704 | 0.638102704 | -5.519235871 |
| 1430476_at   | 0.086658834  | 6.176638988 | 0.485967095  | 0.638113874 | 0.638113874 | -5.519243347 |
| 1457068_at   | 0.033401431  | 5.101881133 | 0.485955896  | 0.638121522 | 0.638121522 | -5.519248466 |
| 1424269_a_at | 0.040746783  | 12.20585856 | 0.485904285  | 0.63815677  | 0.63815677  | -5.519272055 |
| 1428855_at   | 0.074945842  | 5.685788032 | 0.485897174  | 0.638161626 | 0.638161626 | -5.519275304 |
| 1439995_at   | -0.06623651  | 5.097199235 | -0.485896878 | 0.638161828 | 0.638161828 | -5.51927544  |
| 1441879_x_at | -0.043151199 | 4.373991057 | -0.485876061 | 0.638176046 | 0.638176046 | -5.519284953 |
| 1437224_at   | 0.046824567  | 8.478032942 | 0.485854949  | 0.638190465 | 0.638190465 | -5.519294601 |
| 1423684_at   | 0.031923166  | 11.76717112 | 0.485774424  | 0.638245462 | 0.638245462 | -5.519331396 |
| 1439449_at   | 0.067012546  | 4.885472771 | 0.485665873  | 0.638319606 | 0.638319606 | -5.519380989 |
| 1421784_a_at | 0.034100727  | 8.259793164 | 0.485650931  | 0.638329812 | 0.638329812 | -5.519387815 |
| 1457620_at   | -0.037528822 | 3.839882139 | -0.485649938 | 0.638330491 | 0.638330491 | -5.519388268 |
| 1439180_at   | 0.059545651  | 7.703798882 | 0.485585009  | 0.638374841 | 0.638374841 | -5.519417926 |
| 1439872_at   | -0.033597605 | 3.583533913 | -0.485549572 | 0.638399047 | 0.638399047 | -5.51943411  |
| 1435523_s_at | -0.057051232 | 3.170883378 | -0.485480526 | 0.638446213 | 0.638446213 | -5.519465642 |

|              |              |             |              |             |             |              |
|--------------|--------------|-------------|--------------|-------------|-------------|--------------|
| 1460730_at   | -0.032202414 | 9.087817477 | -0.485435681 | 0.638476848 | 0.638476848 | -5.51948612  |
| 1439661_at   | 0.040851334  | 4.720717966 | 0.485429205  | 0.638481271 | 0.638481271 | -5.519489077 |
| 1427069_at   | 0.034706025  | 8.292617705 | 0.485424161  | 0.638484717 | 0.638484717 | -5.51949138  |
| 1440023_at   | 0.044436421  | 4.145299123 | 0.485321671  | 0.638554733 | 0.638554733 | -5.519538171 |
| 1459479_at   | 0.031038903  | 3.838092507 | 0.485295762  | 0.638572433 | 0.638572433 | -5.519549999 |
| 1452589_at   | 0.053645968  | 8.295041523 | 0.485288911  | 0.638577114 | 0.638577114 | -5.519553126 |
| 1447435_at   | -0.042288885 | 3.483584108 | -0.485160726 | 0.63866469  | 0.63866469  | -5.519611632 |
| 1434125_at   | 0.031020375  | 8.589374339 | 0.485146601  | 0.638674341 | 0.638674341 | -5.519618078 |
| 1427738_at   | 0.046570103  | 3.088945566 | 0.485104772  | 0.638702921 | 0.638702921 | -5.519637166 |
| 1452629_at   | 0.050514078  | 7.804756599 | 0.485097603  | 0.638707819 | 0.638707819 | -5.519640437 |
| 1416343_a_at | 0.056363653  | 8.080458283 | 0.485026802  | 0.638756194 | 0.638756194 | -5.519672742 |
| 1427789_s_at | -0.096489055 | 5.481527836 | -0.485016806 | 0.638763024 | 0.638763024 | -5.519677303 |
| 1424223_at   | 0.040685455  | 6.182036039 | 0.485013207  | 0.638765483 | 0.638765483 | -5.519678944 |
| 1434304_s_at | -0.041086053 | 9.055320859 | -0.484923438 | 0.638826822 | 0.638826822 | -5.519719896 |
| 1422116_at   | -0.050743598 | 4.799102496 | -0.484896826 | 0.638845007 | 0.638845007 | -5.519732035 |
| 1416944_a_at | 0.029123136  | 8.271841466 | 0.484895437  | 0.638845956 | 0.638845956 | -5.519732669 |
| 1435757_a_at | 0.046152643  | 10.76807702 | 0.484894049  | 0.638846904 | 0.638846904 | -5.519733302 |
| 1460325_at   | 0.037904563  | 8.706136552 | 0.484890341  | 0.638849438 | 0.638849438 | -5.519734993 |
| 1422533_at   | -0.140953957 | 7.549017375 | -0.484864413 | 0.638867155 | 0.638867155 | -5.519746819 |
| 1455139_at   | -0.044606444 | 7.42637486  | -0.484847273 | 0.638878867 | 0.638878867 | -5.519754636 |
| 1454828_at   | -0.038198628 | 7.816519971 | -0.484778334 | 0.638925977 | 0.638925977 | -5.519786076 |
| 1426496_at   | 0.035187446  | 7.541013693 | 0.484778163  | 0.638926094 | 0.638926094 | -5.519786154 |
| 1440543_at   | -0.035833827 | 6.952210048 | -0.4847443   | 0.638949235 | 0.638949235 | -5.519801596 |
| 1422020_at   | -0.051456022 | 4.350939895 | -0.484696275 | 0.638982054 | 0.638982054 | -5.519823494 |
| 1432503_a_at | 0.033198904  | 3.160160435 | 0.484641723  | 0.639019336 | 0.639019336 | -5.519848366 |
| 1426717_at   | 0.032161632  | 9.418656274 | 0.484632027  | 0.639025962 | 0.639025962 | -5.519852786 |
| 1441792_at   | -0.059546125 | 4.674564708 | -0.484618381 | 0.639035288 | 0.639035288 | -5.519859007 |
| 1422398_at   | -0.046503    | 3.521298587 | -0.484600216 | 0.639047702 | 0.639047702 | -5.519867288 |
| 1446656_at   | -0.048734226 | 8.42914313  | -0.484579975 | 0.639061535 | 0.639061535 | -5.519876515 |
| 1450807_at   | 0.050136214  | 4.683569681 | 0.484548373  | 0.639083134 | 0.639083134 | -5.51989092  |
| 1455519_at   | -0.04569136  | 3.18970798  | -0.484546623 | 0.639084329 | 0.639084329 | -5.519891718 |
| 1431978_at   | 0.035279434  | 4.141203974 | 0.484543652  | 0.63908636  | 0.63908636  | -5.519893072 |
| 1457790_at   | -0.038729014 | 4.027851825 | -0.484523833 | 0.639099905 | 0.639099905 | -5.519902105 |
| 1442304_at   | -0.050522087 | 3.915176045 | -0.484516056 | 0.639105221 | 0.639105221 | -5.51990565  |
| 1440423_at   | 0.053298633  | 3.794770142 | 0.484505095  | 0.639112712 | 0.639112712 | -5.519910646 |
| 1447501_at   | -0.032078413 | 3.361901064 | -0.48442789  | 0.63916548  | 0.63916548  | -5.519945832 |
| 1431798_a_at | -0.061508926 | 7.960817524 | -0.48442725  | 0.639165917 | 0.639165917 | -5.519946124 |
| 1436523_s_at | 0.054111131  | 10.00750121 | 0.484420249  | 0.639170702 | 0.639170702 | -5.519949314 |
| 1424110_a_at | -0.032668884 | 10.75963573 | -0.484419112 | 0.639171479 | 0.639171479 | -5.519949832 |
| 1450941_at   | 0.058242114  | 7.836705584 | 0.484395186  | 0.639187832 | 0.639187832 | -5.519960735 |
| 1455520_at   | -0.041858252 | 7.190177595 | -0.484395034 | 0.639187937 | 0.639187937 | -5.519960804 |
| 1432221_at   | 0.04247383   | 5.594290295 | 0.484310393  | 0.63924579  | 0.63924579  | -5.51999937  |
| 1417913_at   | 0.030847109  | 8.623515854 | 0.484306548  | 0.639248418 | 0.639248418 | -5.520001122 |
| 1424121_at   | 0.044016147  | 8.273266159 | 0.484262687  | 0.639278399 | 0.639278399 | -5.520021105 |
| 1451735_at   | 0.036471188  | 7.570652447 | 0.484138523  | 0.639363274 | 0.639363274 | -5.520077662 |
| 1417755_at   | 0.048107012  | 6.863052888 | 0.48413341   | 0.639366769 | 0.639366769 | -5.520079991 |
| 1454245_at   | -0.061034278 | 3.923485862 | -0.484132409 | 0.639367453 | 0.639367453 | -5.520080447 |
| 1434936_at   | -0.033982534 | 9.423166591 | -0.484108989 | 0.639383463 | 0.639383463 | -5.520091113 |
| 1425155_x_at | -0.043070583 | 4.498830897 | -0.484079049 | 0.639403931 | 0.639403931 | -5.520104748 |
| 1422223_at   | -0.069598489 | 4.587919268 | -0.484057877 | 0.639418404 | 0.639418404 | -5.52011439  |
| 1421190_at   | 0.078823075  | 4.068907635 | 0.484056813  | 0.639419131 | 0.639419131 | -5.520114874 |
| 1426498_at   | -0.058259032 | 5.591222769 | -0.484022988 | 0.639442255 | 0.639442255 | -5.520130277 |
| 1428924_at   | -0.035722677 | 5.813446251 | -0.484012141 | 0.639449671 | 0.639449671 | -5.520135216 |

|              |              |             |              |             |             |              |
|--------------|--------------|-------------|--------------|-------------|-------------|--------------|
| 1450193_at   | -0.054842416 | 4.329367984 | -0.484011141 | 0.639450354 | 0.639450354 | -5.520135672 |
| 1450869_at   | -0.050476213 | 4.51190571  | -0.483959676 | 0.639485538 | 0.639485538 | -5.520159105 |
| 1442830_at   | 0.036377757  | 4.563787821 | 0.483927118  | 0.639507796 | 0.639507796 | -5.520173927 |
| 1460441_at   | -0.043979456 | 6.449920721 | -0.483903148 | 0.639524184 | 0.639524184 | -5.52018484  |
| 1447613_at   | 0.040496189  | 3.575269291 | 0.483900772  | 0.639525809 | 0.639525809 | -5.520185922 |
| 1460020_at   | 0.079620846  | 6.313049306 | 0.483851931  | 0.639559201 | 0.639559201 | -5.520208155 |
| 1447977_x_at | -0.073738233 | 8.217123266 | -0.483850767 | 0.639559997 | 0.639559997 | -5.520208685 |
| 1427812_at   | 0.050977998  | 4.115286688 | 0.48382696   | 0.639576273 | 0.639576273 | -5.520219521 |
| 1434989_at   | 0.053024838  | 4.279908372 | 0.483782764  | 0.639606491 | 0.639606491 | -5.520239638 |
| 1447288_at   | -0.044064836 | 3.633348282 | -0.483767247 | 0.6396171   | 0.6396171   | -5.5202467   |
| 1458737_at   | 0.033975816  | 5.718372846 | 0.483675686  | 0.639679704 | 0.639679704 | -5.520288367 |
| 1425071_s_at | 0.049558475  | 5.3301219   | 0.483644887  | 0.639700763 | 0.639700763 | -5.520302382 |
| 1420721_at   | 0.034258248  | 3.365969453 | 0.483620698  | 0.639717303 | 0.639717303 | -5.520313388 |
| 1450669_at   | 0.053849883  | 6.631341887 | 0.483590334  | 0.639738065 | 0.639738065 | -5.520327203 |
| 1420706_at   | -0.040494876 | 4.026799761 | -0.48357612  | 0.639747785 | 0.639747785 | -5.52033367  |
| 1434404_at   | 0.039540601  | 7.701109904 | 0.483563307  | 0.639756546 | 0.639756546 | -5.520339499 |
| 1448442_a_at | 0.032158082  | 12.15669367 | 0.483552562  | 0.639763893 | 0.639763893 | -5.520344387 |
| 1458359_at   | -0.032276233 | 3.993562919 | -0.483533403 | 0.639776995 | 0.639776995 | -5.520353103 |
| 1420734_at   | -0.031260324 | 7.038216963 | -0.483502984 | 0.639797796 | 0.639797796 | -5.520366941 |
| 1423943_at   | 0.039098203  | 8.500983715 | 0.483468453  | 0.639821409 | 0.639821409 | -5.520382648 |
| 1417962_s_at | 0.041212386  | 10.42938208 | 0.483392471  | 0.639873368 | 0.639873368 | -5.520417206 |
| 1443200_at   | -0.040146253 | 3.771576583 | -0.483308452 | 0.639930827 | 0.639930827 | -5.520455414 |
| 1438145_at   | 0.041352001  | 3.279529224 | 0.483294559  | 0.639940329 | 0.639940329 | -5.520461732 |
| 1454085_at   | 0.033184224  | 4.142192516 | 0.483288008  | 0.639944808 | 0.639944808 | -5.52046471  |
| 1449097_at   | -0.032165212 | 6.945109446 | -0.483242932 | 0.639975636 | 0.639975636 | -5.520485205 |
| 1431240_at   | -0.039963082 | 3.611386514 | -0.483239699 | 0.639977847 | 0.639977847 | -5.520486675 |
| 1458732_at   | -0.051474011 | 3.969633337 | -0.483208451 | 0.639999218 | 0.639999218 | -5.520500882 |
| 1416503_at   | 0.031678893  | 10.01502899 | 0.483179097  | 0.640019295 | 0.640019295 | -5.520514227 |
| 1442072_at   | 0.06322496   | 5.078516451 | 0.483175046  | 0.640022065 | 0.640022065 | -5.520516068 |
| 1429195_at   | -0.04052237  | 5.695520003 | -0.48309111  | 0.640079474 | 0.640079474 | -5.520554222 |
| 1426961_at   | 0.035481543  | 9.09995362  | 0.482943481  | 0.64018045  | 0.64018045  | -5.520621313 |
| 1455222_a_at | -0.031554126 | 10.11582159 | -0.482808248 | 0.640272956 | 0.640272956 | -5.520682753 |
| 1420027_at   | 0.042644112  | 3.5242063   | 0.482783594  | 0.64028982  | 0.64028982  | -5.520693952 |
| 1434623_at   | 0.036347144  | 3.899579711 | 0.482782722  | 0.640290417 | 0.640290417 | -5.520694349 |
| 1460262_a_at | -0.049696379 | 8.189590873 | -0.482774742 | 0.640295876 | 0.640295876 | -5.520697973 |
| 1460165_at   | 0.032513821  | 11.77926987 | 0.48277163   | 0.640298005 | 0.640298005 | -5.520699387 |
| 1447989_at   | 0.044373378  | 3.704025519 | 0.482768891  | 0.640299879 | 0.640299879 | -5.520700631 |
| 1456843_at   | -0.038318983 | 8.062526967 | -0.482737061 | 0.640321653 | 0.640321653 | -5.520715089 |
| 1452832_s_at | 0.033730521  | 8.028918943 | 0.482731724  | 0.640325304 | 0.640325304 | -5.520717513 |
| 1438529_at   | 0.051400039  | 5.180776745 | 0.482717452  | 0.640335067 | 0.640335067 | -5.520723995 |
| 1459542_at   | 0.039700504  | 3.179358546 | 0.482682699  | 0.640358843 | 0.640358843 | -5.52073978  |
| 1428620_at   | 0.028931552  | 9.88106722  | 0.482651961  | 0.640379871 | 0.640379871 | -5.520753739 |
| 1448537_at   | 0.033845408  | 8.843324145 | 0.482645899  | 0.640384018 | 0.640384018 | -5.520756492 |
| 1429912_at   | -0.061893601 | 4.826350578 | -0.482576138 | 0.640431744 | 0.640431744 | -5.52078817  |
| 1432660_at   | -0.039172807 | 5.590831383 | -0.482568442 | 0.640437009 | 0.640437009 | -5.520791664 |
| 1451066_at   | 0.050373303  | 9.395340375 | 0.482562319  | 0.640441198 | 0.640441198 | -5.520794444 |
| 1452230_at   | 0.034682256  | 9.189794416 | 0.482528885  | 0.640464072 | 0.640464072 | -5.520809625 |
| 1444591_at   | 0.035779279  | 6.602034505 | 0.482478413  | 0.640498604 | 0.640498604 | -5.520832539 |
| 1458708_at   | 0.038559818  | 7.763945223 | 0.482452518  | 0.640516321 | 0.640516321 | -5.520844295 |
| 1424849_at   | -0.031727394 | 5.714590258 | -0.482420094 | 0.640538506 | 0.640538506 | -5.520859013 |
| 1449473_s_at | -0.04561747  | 5.602496295 | -0.482356062 | 0.640582318 | 0.640582318 | -5.520888077 |
| 1458328_x_at | -0.066833639 | 5.08032176  | -0.482351298 | 0.640585578 | 0.640585578 | -5.520890239 |
| 1436634_at   | -0.047116172 | 4.060372206 | -0.482337976 | 0.640594693 | 0.640594693 | -5.520896286 |

|              |              |             |              |             |             |              |
|--------------|--------------|-------------|--------------|-------------|-------------|--------------|
| 1443475_at   | 0.05468599   | 4.3544936   | 0.482337965  | 0.6405947   | 0.6405947   | -5.52089629  |
| 1426783_at   | 0.042710165  | 9.003302591 | 0.482300054  | 0.640620641 | 0.640620641 | -5.520913496 |
| 1443805_at   | -0.079107815 | 5.492870514 | -0.482268556 | 0.640642193 | 0.640642193 | -5.52092779  |
| 1434286_at   | 0.051714528  | 7.780033403 | 0.482260232  | 0.640647889 | 0.640647889 | -5.520931567 |
| 1451934_at   | -0.041074266 | 3.954065262 | -0.482227862 | 0.640670038 | 0.640670038 | -5.520946255 |
| 1442448_at   | -0.04169171  | 6.991525278 | -0.482217695 | 0.640676996 | 0.640676996 | -5.520950869 |
| 1450770_at   | -0.04160781  | 7.500090609 | -0.482187572 | 0.640697608 | 0.640697608 | -5.520964536 |
| 1420665_at   | -0.096893768 | 4.731217976 | -0.48215651  | 0.640718864 | 0.640718864 | -5.520978629 |
| 1423714_at   | -0.028718606 | 8.352470677 | -0.482122028 | 0.64074246  | 0.64074246  | -5.520994273 |
| 1450542_s_at | -0.037972442 | 3.828148625 | -0.482104727 | 0.6407543   | 0.6407543   | -5.521002122 |
| 1425801_x_at | -0.058610169 | 8.552959819 | -0.482095846 | 0.640760377 | 0.640760377 | -5.52100615  |
| 1443618_at   | -0.04945775  | 4.434811826 | -0.482044355 | 0.640795614 | 0.640795614 | -5.521029507 |
| 1449801_at   | -0.037163525 | 3.384987577 | -0.482032119 | 0.640803987 | 0.640803987 | -5.521035057 |
| 1424912_at   | 0.038415314  | 9.009406353 | 0.482029897  | 0.640805508 | 0.640805508 | -5.521036065 |
| 1454224_at   | -0.045395863 | 3.977742662 | -0.481934733 | 0.640870634 | 0.640870634 | -5.521079225 |
| 1460545_at   | 0.035702921  | 10.31055112 | 0.481920086  | 0.640880659 | 0.640880659 | -5.521085868 |
| 1428350_at   | -0.041321351 | 7.001319718 | -0.481848853 | 0.64092941  | 0.64092941  | -5.521118168 |
| 1440514_at   | -0.039980839 | 3.387326652 | -0.481838957 | 0.640936183 | 0.640936183 | -5.521122655 |
| 1416774_at   | -0.035768591 | 7.665178087 | -0.481813327 | 0.640953725 | 0.640953725 | -5.521134276 |
| 1418542_s_at | -0.044622864 | 7.052337921 | -0.481811313 | 0.640955103 | 0.640955103 | -5.521135189 |
| 1449892_at   | 0.051298761  | 4.377850413 | 0.481724425  | 0.641014573 | 0.641014573 | -5.521174579 |
| 1437637_at   | -0.051667375 | 6.761664238 | -0.481654494 | 0.641062438 | 0.641062438 | -5.521206277 |
| 1455041_at   | 0.040996076  | 3.327299855 | 0.481625829  | 0.641082059 | 0.641082059 | -5.521219269 |
| 1426443_at   | -0.032358981 | 6.89654753  | -0.481604797 | 0.641096455 | 0.641096455 | -5.521228801 |
| 1450418_a_at | -0.098913318 | 5.928677496 | -0.481593541 | 0.64110416  | 0.64110416  | -5.521233902 |
| 1435677_at   | -0.036661114 | 7.287890304 | -0.481559435 | 0.641127505 | 0.641127505 | -5.521249358 |
| 1441804_at   | -0.034599818 | 3.458097864 | -0.481519087 | 0.641155124 | 0.641155124 | -5.521267641 |
| 1426854_a_at | 0.031900509  | 12.17572196 | 0.481493489  | 0.641172647 | 0.641172647 | -5.52127924  |
| 1434677_at   | -0.055017558 | 6.180020014 | -0.481445788 | 0.6412053   | 0.6412053   | -5.521300852 |
| 1434131_at   | 0.043569316  | 7.567412158 | 0.481444759  | 0.641206005 | 0.641206005 | -5.521301318 |
| 1457463_at   | -0.044227453 | 5.445465348 | -0.481378299 | 0.641251501 | 0.641251501 | -5.521331427 |
| 1427548_a_at | 0.035213327  | 9.537401012 | 0.481366432  | 0.641259625 | 0.641259625 | -5.521336802 |
| 1424788_at   | 0.040170231  | 8.189902746 | 0.481365079  | 0.641260552 | 0.641260552 | -5.521337416 |
| 1456936_at   | -0.030607969 | 3.373875648 | -0.481275402 | 0.641321944 | 0.641321944 | -5.521378034 |
| 1445515_at   | 0.040419939  | 4.667467834 | 0.481173335  | 0.641391822 | 0.641391822 | -5.521424256 |
| 1459387_at   | -0.035192009 | 3.830197725 | -0.481150752 | 0.641407284 | 0.641407284 | -5.521434482 |
| 1440291_at   | 0.037765453  | 3.228701271 | 0.48108596   | 0.641451645 | 0.641451645 | -5.521463818 |
| 1422707_at   | -0.086824048 | 5.744702741 | -0.481081781 | 0.641454506 | 0.641454506 | -5.521465709 |
| 1450223_at   | 0.040523556  | 7.663314026 | 0.48107203   | 0.641461182 | 0.641461182 | -5.521470124 |
| 1422220_at   | 0.051291607  | 3.924249109 | 0.481050724  | 0.64147577  | 0.64147577  | -5.52147977  |
| 1434714_at   | 0.037462507  | 6.773479854 | 0.480997181  | 0.641512431 | 0.641512431 | -5.521504008 |
| 1419298_at   | -0.094615774 | 6.135596125 | -0.480948737 | 0.641545602 | 0.641545602 | -5.521525935 |
| 1448044_a_at | 0.034582913  | 3.768936682 | 0.480902631  | 0.641577172 | 0.641577172 | -5.521546802 |
| 1435533_s_at | 0.041245975  | 8.200743136 | 0.4808887    | 0.641586711 | 0.641586711 | -5.521553107 |
| 1416087_at   | -0.036149171 | 9.168457742 | -0.48087352  | 0.641597106 | 0.641597106 | -5.521559977 |
| 1451543_at   | 0.040483623  | 8.136578421 | 0.480752811  | 0.641679765 | 0.641679765 | -5.521614597 |
| 1434941_s_at | 0.03540129   | 8.513403077 | 0.480741802  | 0.641687304 | 0.641687304 | -5.521619578 |
| 1449793_at   | -0.035941575 | 3.941103858 | -0.480721216 | 0.641701401 | 0.641701401 | -5.521628892 |
| 1423309_at   | 0.032276737  | 9.028885295 | 0.480699323  | 0.641716394 | 0.641716394 | -5.521638796 |
| 1446986_at   | -0.04699856  | 4.111905013 | -0.480676175 | 0.641732246 | 0.641732246 | -5.521649268 |
| 1416406_at   | 0.041076238  | 8.109009934 | 0.480573316  | 0.641802689 | 0.641802689 | -5.521695794 |
| 1454765_at   | 0.041224297  | 7.65889289  | 0.480572933  | 0.641802951 | 0.641802951 | -5.521695967 |
| 1448069_at   | 0.048659711  | 3.544183259 | 0.480553296  | 0.6418164   | 0.6418164   | -5.521704848 |

|              |              |             |              |             |             |              |
|--------------|--------------|-------------|--------------|-------------|-------------|--------------|
| 1444339_at   | -0.05056762  | 4.113185887 | -0.48053354  | 0.64182993  | 0.64182993  | -5.521713783 |
| 1429514_at   | -0.03829101  | 10.41636853 | -0.480499075 | 0.641853535 | 0.641853535 | -5.521729369 |
| 1446105_at   | -0.041324205 | 4.089874567 | -0.480454459 | 0.641884092 | 0.641884092 | -5.521749544 |
| 1430836_at   | -0.0337189   | 3.963683512 | -0.480410272 | 0.641914356 | 0.641914356 | -5.521769524 |
| 1457004_at   | -0.055714215 | 6.357667098 | -0.48037317  | 0.641939768 | 0.641939768 | -5.521786298 |
| 1433679_at   | -0.063644692 | 8.526055904 | -0.480351502 | 0.64195461  | 0.64195461  | -5.521796094 |
| 1431177_a_at | 0.029104829  | 13.08835037 | 0.48029613   | 0.641992537 | 0.641992537 | -5.521821126 |
| 1423437_at   | 0.061514376  | 3.7198099   | 0.480255189  | 0.64202058  | 0.64202058  | -5.521839632 |
| 1443464_at   | 0.036566444  | 5.928171551 | 0.480228413  | 0.642038921 | 0.642038921 | -5.521851734 |
| 1442151_at   | 0.041637236  | 7.268605558 | 0.480097225  | 0.642128786 | 0.642128786 | -5.521911102 |
| 1419025_at   | -0.045015513 | 4.489709061 | -0.480008131 | 0.642189819 | 0.642189819 | -5.521951274 |
| 1427765_a_at | -0.034004954 | 3.895171336 | -0.479951832 | 0.642228388 | 0.642228388 | -5.521976707 |
| 1455008_at   | -0.052078393 | 8.495300834 | -0.479910132 | 0.642256957 | 0.642256957 | -5.521995544 |
| 1443596_at   | -0.046560419 | 4.25750761  | -0.479890701 | 0.642270269 | 0.642270269 | -5.52200432  |
| 1425224_at   | 0.043349908  | 6.818286591 | 0.479763228  | 0.642357605 | 0.642357605 | -5.52206189  |
| 1431440_at   | -0.052093037 | 4.355376072 | -0.479699815 | 0.642401052 | 0.642401052 | -5.522090522 |
| 1418884_x_at | 0.040695241  | 12.78091083 | 0.479698816  | 0.642401737 | 0.642401737 | -5.522090973 |
| 1446089_at   | 0.040550959  | 3.485498653 | 0.479644521  | 0.642438939 | 0.642438939 | -5.522115487 |
| 1418477_at   | -0.225625794 | 4.216971439 | -0.479593308 | 0.64247403  | 0.64247403  | -5.522138606 |
| 1453831_at   | -0.039483494 | 3.672457017 | -0.479558331 | 0.642497997 | 0.642497997 | -5.522154394 |
| 1440371_at   | -0.042476248 | 7.465029348 | -0.47952987  | 0.6425175   | 0.6425175   | -5.52216724  |
| 1425623_a_at | 0.036538157  | 5.763041555 | 0.479509593  | 0.642531394 | 0.642531394 | -5.522176392 |
| 1416847_s_at | -0.036103996 | 3.56531926  | -0.479502049 | 0.642536563 | 0.642536563 | -5.522179797 |
| 1457333_at   | -0.064428483 | 6.10896938  | -0.479470496 | 0.642558185 | 0.642558185 | -5.522194037 |
| 1439293_at   | -0.059211265 | 8.225540609 | -0.479403172 | 0.64260432  | 0.64260432  | -5.522224419 |
| 1447522_s_at | 0.051061276  | 8.641152749 | 0.479367082  | 0.642629052 | 0.642629052 | -5.522240703 |
| 1427219_at   | 0.05401498   | 5.965716985 | 0.479311732  | 0.642666983 | 0.642666983 | -5.522265676 |
| 1442349_at   | 0.054893169  | 5.010813126 | 0.479277938  | 0.642690143 | 0.642690143 | -5.522280922 |
| 1452042_a_at | 0.042058796  | 5.348254223 | 0.479237103  | 0.642718128 | 0.642718128 | -5.522299343 |
| 1456014_s_at | 0.098271663  | 7.018433279 | 0.479172731  | 0.642762246 | 0.642762246 | -5.522328379 |
| 1436348_at   | -0.031828706 | 8.74350696  | -0.479157207 | 0.642772885 | 0.642772885 | -5.522335381 |
| 1452916_at   | -0.045525308 | 8.922926361 | -0.479155709 | 0.642773912 | 0.642773912 | -5.522336056 |
| 1424128_x_at | 0.03604996   | 8.369987322 | 0.479151624  | 0.642776712 | 0.642776712 | -5.522337899 |
| 1438129_at   | -0.046343223 | 6.535629289 | -0.479120305 | 0.642798177 | 0.642798177 | -5.522352024 |
| 1460646_at   | 0.05301613   | 8.875989161 | 0.478969612  | 0.642901463 | 0.642901463 | -5.522419974 |
| 1416385_a_at | -0.030443903 | 9.70712233  | -0.4789393   | 0.64292224  | 0.64292224  | -5.52243364  |
| 1440194_at   | 0.042633534  | 6.502371843 | 0.478930916  | 0.642927986 | 0.642927986 | -5.52243742  |
| 1416608_a_at | -0.053016409 | 9.127078218 | -0.478906283 | 0.642944871 | 0.642944871 | -5.522448525 |
| 1440213_a_at | 0.049194901  | 4.862506932 | 0.478891557  | 0.642954965 | 0.642954965 | -5.522455163 |
| 1454251_at   | 0.036169944  | 5.40874509  | 0.478864428  | 0.642973561 | 0.642973561 | -5.522467392 |
| 1436817_at   | -0.030917977 | 9.247427365 | -0.478853328 | 0.64298117  | 0.64298117  | -5.522472395 |
| 1444806_at   | -0.040989568 | 7.45809266  | -0.478794601 | 0.643021426 | 0.643021426 | -5.522498865 |
| 1416020_a_at | -0.033095512 | 10.57837    | -0.478771054 | 0.643037567 | 0.643037567 | -5.522509477 |
| 1417560_at   | 0.044646548  | 9.849934946 | 0.478653489  | 0.643118161 | 0.643118161 | -5.522562455 |
| 1427653_at   | -0.049360484 | 4.472497922 | -0.478634067 | 0.643131476 | 0.643131476 | -5.522571206 |
| 1434407_at   | -0.053996307 | 7.243504425 | -0.478610463 | 0.643147657 | 0.643147657 | -5.52258184  |
| 1446599_at   | 0.040423399  | 6.331881567 | 0.478558588  | 0.643183222 | 0.643183222 | -5.522605211 |
| 1453579_at   | 0.047827371  | 5.482539403 | 0.47853203   | 0.643201429 | 0.643201429 | -5.522617174 |
| 1454966_at   | -0.047718478 | 9.857303326 | -0.478445156 | 0.64326099  | 0.64326099  | -5.522656304 |
| 1440335_at   | -0.034639262 | 3.856018483 | -0.478411289 | 0.64328421  | 0.64328421  | -5.522671557 |
| 1452268_at   | 0.03317177   | 9.294638349 | 0.478384134  | 0.643302828 | 0.643302828 | -5.522683786 |
| 1417920_at   | -0.054065562 | 4.203831716 | -0.478369571 | 0.643312814 | 0.643312814 | -5.522690344 |
| 1424094_at   | 0.030378767  | 10.46311752 | 0.478360802  | 0.643318826 | 0.643318826 | -5.522694293 |

|              |              |             |              |             |             |              |
|--------------|--------------|-------------|--------------|-------------|-------------|--------------|
| 1425271_at   | -0.037399208 | 7.71263669  | -0.478357869 | 0.643320837 | 0.643320837 | -5.522695614 |
| 1433886_at   | -0.040472346 | 9.437204605 | -0.478319745 | 0.643346977 | 0.643346977 | -5.522712781 |
| 1447822_x_at | -0.046900537 | 5.025573828 | -0.478317479 | 0.643348531 | 0.643348531 | -5.522713801 |
| 1454246_at   | -0.049961437 | 4.37422352  | -0.478299366 | 0.64336095  | 0.64336095  | -5.522721957 |
| 1435059_at   | -0.035097251 | 8.638151347 | -0.478249771 | 0.643394957 | 0.643394957 | -5.522744286 |
| 1423287_at   | 0.067700079  | 4.452565273 | 0.478247991  | 0.643396177 | 0.643396177 | -5.522745087 |
| 1442281_at   | -0.041699623 | 5.807744999 | -0.478220304 | 0.643415162 | 0.643415162 | -5.522757552 |
| 1457651_x_at | 0.041919317  | 4.253324467 | 0.478215608  | 0.643418382 | 0.643418382 | -5.522759666 |
| 1442861_at   | -0.046131    | 6.834887346 | -0.478072108 | 0.643516783 | 0.643516783 | -5.522824258 |
| 1454841_at   | -0.05174004  | 6.984054562 | -0.478008747 | 0.643560234 | 0.643560234 | -5.522852772 |
| 1424428_at   | -0.055891637 | 8.509550186 | -0.477992721 | 0.643571224 | 0.643571224 | -5.522859984 |
| 1454435_at   | 0.041990533  | 3.991112247 | 0.477918999  | 0.643621782 | 0.643621782 | -5.522893155 |
| 1447162_at   | -0.049712189 | 4.672228323 | -0.477884417 | 0.643645499 | 0.643645499 | -5.522908714 |
| 1416478_a_at | -0.03292851  | 11.66573788 | -0.47787653  | 0.643650908 | 0.643650908 | -5.522912262 |
| 1431288_at   | -0.040323941 | 4.222372022 | -0.477859305 | 0.643662721 | 0.643662721 | -5.522920011 |
| 1444175_at   | 0.059845615  | 5.689407146 | 0.477852926  | 0.643667096 | 0.643667096 | -5.52292288  |
| 1426835_at   | 0.038830924  | 8.959328763 | 0.477803617  | 0.643700914 | 0.643700914 | -5.522945061 |
| 1452283_at   | -0.033343058 | 8.493178051 | -0.47774707  | 0.643739697 | 0.643739697 | -5.522970496 |
| 1443465_at   | 0.044846874  | 3.692700035 | 0.477719573  | 0.643758556 | 0.643758556 | -5.522982862 |
| 1424923_at   | 0.033436366  | 4.179477284 | 0.477696822  | 0.64377416  | 0.64377416  | -5.522993094 |
| 1447969_at   | 0.028935691  | 3.841756398 | 0.477689963  | 0.643778865 | 0.643778865 | -5.522996179 |
| 1446923_at   | 0.047206116  | 4.388398496 | 0.477626809  | 0.643822182 | 0.643822182 | -5.523024578 |
| 1455189_at   | 0.041419164  | 8.544248091 | 0.477602476  | 0.643838873 | 0.643838873 | -5.523035519 |
| 1426103_a_at | -0.037016747 | 4.573765477 | -0.47756438  | 0.643865003 | 0.643865003 | -5.523052648 |
| 1425870_a_at | -0.033593402 | 3.557017379 | -0.477514865 | 0.643898968 | 0.643898968 | -5.523074909 |
| 1452989_at   | 0.050837318  | 7.289920185 | 0.477488371  | 0.643917141 | 0.643917141 | -5.523086819 |
| 1430258_at   | -0.053745055 | 5.000174807 | -0.477436395 | 0.643952795 | 0.643952795 | -5.523110183 |
| 1440197_at   | 0.049073383  | 4.315815456 | 0.47741577   | 0.643966944 | 0.643966944 | -5.523119454 |
| 1448317_at   | 0.044500596  | 9.625931176 | 0.4773309    | 0.644025164 | 0.644025164 | -5.523157597 |
| 1446393_at   | -0.034240657 | 3.362209283 | -0.477305177 | 0.64404281  | 0.64404281  | -5.523169156 |
| 1443070_at   | -0.031510706 | 8.071429281 | -0.477233842 | 0.644091748 | 0.644091748 | -5.52320121  |
| 1428326_s_at | 0.049178534  | 7.918458659 | 0.477224454  | 0.644098189 | 0.644098189 | -5.523205428 |
| 1428675_at   | 0.033055324  | 8.519226421 | 0.477219634  | 0.644101496 | 0.644101496 | -5.523207593 |
| 1416618_at   | 0.050013071  | 8.246499427 | 0.47717363   | 0.644133057 | 0.644133057 | -5.523228261 |
| 1457930_at   | -0.071094857 | 7.043037099 | -0.477163736 | 0.644139846 | 0.644139846 | -5.523232707 |
| 1423545_a_at | 0.031988492  | 11.14175195 | 0.47715491   | 0.644145901 | 0.644145901 | -5.523236671 |
| 1452725_a_at | -0.02957871  | 8.146637125 | -0.477131402 | 0.644162029 | 0.644162029 | -5.523247232 |
| 1425090_s_at | -0.05105163  | 5.756080667 | -0.477103267 | 0.644181332 | 0.644181332 | -5.52325987  |
| 1444729_at   | -0.031033842 | 5.861684786 | -0.477092722 | 0.644188567 | 0.644188567 | -5.523264607 |
| 1428465_at   | -0.028601014 | 10.06504786 | -0.477048902 | 0.644218632 | 0.644218632 | -5.523284289 |
| 1445934_at   | -0.029915751 | 7.340588864 | -0.477034643 | 0.644228415 | 0.644228415 | -5.523290693 |
| 1449761_at   | -0.051296721 | 3.783640113 | -0.477025642 | 0.644234591 | 0.644234591 | -5.523294736 |
| 1456785_at   | -0.048792723 | 6.191781752 | -0.477018142 | 0.644239737 | 0.644239737 | -5.523298104 |
| 1447868_x_at | 0.0509909    | 4.335685519 | 0.47699876   | 0.644253035 | 0.644253035 | -5.523306809 |
| 1456463_at   | 0.049441587  | 5.550727548 | 0.476981405  | 0.644264944 | 0.644264944 | -5.523314603 |
| 1448968_at   | -0.034802392 | 8.587515501 | -0.476979522 | 0.644266235 | 0.644266235 | -5.523315448 |
| 1432664_at   | 0.046813382  | 3.719612349 | 0.476937088  | 0.644295351 | 0.644295351 | -5.523334504 |
| 1446210_at   | 0.037652431  | 5.644514806 | 0.476919674  | 0.6443073   | 0.6443073   | -5.523342323 |
| 1428316_a_at | -0.052203825 | 10.58925813 | -0.476916881 | 0.644309216 | 0.644309216 | -5.523343578 |
| 1446676_at   | 0.048575276  | 4.409640445 | 0.476915762  | 0.644309984 | 0.644309984 | -5.52334408  |
| 1423519_at   | -0.049417853 | 9.180158344 | -0.476895116 | 0.644324151 | 0.644324151 | -5.52335335  |
| 1421193_a_at | 0.038353608  | 8.897148356 | 0.476887271  | 0.644329533 | 0.644329533 | -5.523356873 |
| 1438649_x_at | 0.032203799  | 13.0525246  | 0.476882626  | 0.644332721 | 0.644332721 | -5.523358958 |



|                |              |             |              |             |             |              |
|----------------|--------------|-------------|--------------|-------------|-------------|--------------|
| 1422002_at     | -0.047268471 | 5.75163148  | -0.476764828 | 0.644413553 | 0.644413553 | -5.523411843 |
| 1431610_at     | 0.041563176  | 3.516694133 | 0.47671186   | 0.6444499   | 0.6444499   | -5.523435618 |
| 1434038_at     | 0.033844014  | 9.134226387 | 0.476675233  | 0.644475036 | 0.644475036 | -5.523452057 |
| 1457645_at     | -0.049283317 | 3.14058909  | -0.476630246 | 0.644505908 | 0.644505908 | -5.523472247 |
| 1455086_at     | 0.054063288  | 5.002611788 | 0.476615624  | 0.644515943 | 0.644515943 | -5.523478809 |
| 1427476_a_at   | -0.086701365 | 8.502198703 | -0.476605523 | 0.644522875 | 0.644522875 | -5.523483342 |
| 1451215_at     | -0.062964563 | 7.350394891 | -0.476577642 | 0.644542008 | 0.644542008 | -5.523495853 |
| 1423122_at     | 0.040578124  | 7.711261191 | 0.476546666  | 0.644563267 | 0.644563267 | -5.523509752 |
| 1418894_s_at   | 0.054471928  | 7.683448193 | 0.476503981  | 0.644592562 | 0.644592562 | -5.523528904 |
| AFFX-ThrX-5_at | 0.055549889  | 4.851815937 | 0.476493421  | 0.644599809 | 0.644599809 | -5.523533641 |
| 1452997_at     | -0.064928494 | 11.98739788 | -0.476405159 | 0.644660385 | 0.644660385 | -5.523573236 |
| 1430152_at     | -0.046054292 | 7.035012673 | -0.476345656 | 0.644701225 | 0.644701225 | -5.523599926 |
| 1423093_at     | -0.038762369 | 6.796633708 | -0.476260467 | 0.644759697 | 0.644759697 | -5.523638131 |
| 1434727_at     | 0.035196667  | 3.316028589 | 0.476198897  | 0.644801958 | 0.644801958 | -5.52366574  |
| 1444429_at     | -0.041273942 | 4.190459415 | -0.476184025 | 0.644812167 | 0.644812167 | -5.523672408 |
| 1457967_at     | -0.0477001   | 4.744453543 | -0.476181437 | 0.644813944 | 0.644813944 | -5.523673569 |
| 1427140_at     | 0.05114414   | 5.533621173 | 0.4761531    | 0.644833395 | 0.644833395 | -5.523686274 |
| 1419570_at     | 0.031667757  | 4.143428019 | 0.476106017  | 0.644865714 | 0.644865714 | -5.523707382 |
| 1449717_at     | -0.038955384 | 4.380841333 | -0.476098502 | 0.644870872 | 0.644870872 | -5.523710751 |
| 1431359_a_at   | -0.033900439 | 7.123542125 | -0.476090429 | 0.644876414 | 0.644876414 | -5.52371437  |
| 1431721_a_at   | -0.034640257 | 4.176274297 | -0.476060861 | 0.644896711 | 0.644896711 | -5.523727625 |
| 1424792_at     | 0.030963523  | 6.881815354 | 0.476028607  | 0.644918853 | 0.644918853 | -5.523742082 |
| 1428483_a_at   | 0.04042697   | 7.574004291 | 0.476021613  | 0.644923654 | 0.644923654 | -5.523745217 |
| 1422887_a_at   | 0.043272383  | 9.888532854 | 0.476008571  | 0.644932607 | 0.644932607 | -5.523751063 |
| 1452837_at     | -0.042878607 | 8.074254711 | -0.475961168 | 0.644965149 | 0.644965149 | -5.523772309 |
| 1431344_at     | -0.044212811 | 3.873925666 | -0.475954987 | 0.644969392 | 0.644969392 | -5.523775079 |
| 1443720_s_at   | -0.056618672 | 3.578874066 | -0.47589597  | 0.645009908 | 0.645009908 | -5.523801527 |
| 1436128_at     | 0.032997042  | 5.010775971 | 0.475849031  | 0.645042133 | 0.645042133 | -5.52382256  |
| 1445689_at     | 0.039264991  | 8.524827689 | 0.475809564  | 0.645069228 | 0.645069228 | -5.523840243 |
| 1423109_s_at   | 0.044778691  | 8.050065921 | 0.475738975  | 0.645117692 | 0.645117692 | -5.523871868 |
| 1423563_at     | -0.056725767 | 5.029498175 | -0.47568668  | 0.645153597 | 0.645153597 | -5.523895293 |
| 1418186_at     | -0.036376141 | 7.50713719  | -0.475611125 | 0.645205474 | 0.645205474 | -5.523929134 |
| 1429991_at     | -0.080927421 | 4.151860746 | -0.475572879 | 0.645231734 | 0.645231734 | -5.523946262 |
| 1457190_at     | -0.045200379 | 4.244672658 | -0.475391364 | 0.645356374 | 0.645356374 | -5.524027534 |
| 1441927_at     | -0.044807876 | 4.993969057 | -0.47528158  | 0.645431765 | 0.645431765 | -5.524076675 |
| 1429056_at     | 0.03078308   | 8.070345823 | 0.475263445  | 0.645444219 | 0.645444219 | -5.524084792 |
| 1450746_at     | -0.029460042 | 8.614199121 | -0.475221801 | 0.645472818 | 0.645472818 | -5.524103429 |
| 1426039_a_at   | -0.041059128 | 6.280294526 | -0.47515937  | 0.645515693 | 0.645515693 | -5.524131366 |
| 1419181_at     | 0.055063869  | 9.289866673 | 0.475128903  | 0.645536618 | 0.645536618 | -5.524144998 |
| 1457741_at     | -0.049022149 | 5.672821784 | -0.475097594 | 0.64555812  | 0.64555812  | -5.524159006 |
| 1454065_at     | 0.050305303  | 4.086350658 | 0.475085467  | 0.645566449 | 0.645566449 | -5.524164432 |
| 1459955_at     | 0.048634075  | 3.683621018 | 0.475044503  | 0.645594584 | 0.645594584 | -5.524182758 |
| 1437457_a_at   | 0.060798065  | 10.93679733 | 0.475043528  | 0.645595253 | 0.645595253 | -5.524183194 |
| 1444909_at     | 0.032793258  | 4.973214615 | 0.475012409  | 0.645616627 | 0.645616627 | -5.524197115 |
| 1443226_at     | -0.032189126 | 6.020576953 | -0.475008322 | 0.645619434 | 0.645619434 | -5.524198943 |
| 1445361_at     | -0.032364275 | 6.501401977 | -0.474967048 | 0.645647783 | 0.645647783 | -5.524217405 |
| 1422394_at     | 0.037888394  | 3.758891788 | 0.474959873  | 0.645652711 | 0.645652711 | -5.524220615 |
| 1425859_a_at   | 0.030019003  | 9.927336141 | 0.474948604  | 0.645660451 | 0.645660451 | -5.524225655 |
| 1436190_at     | 0.051405164  | 8.2825445   | 0.474928885  | 0.645673995 | 0.645673995 | -5.524234474 |
| 1430962_at     | -0.029913198 | 3.550851115 | -0.474919942 | 0.645680138 | 0.645680138 | -5.524238474 |
| 1419524_at     | -0.047718813 | 4.071142991 | -0.474780008 | 0.645776257 | 0.645776257 | -5.52430105  |
| 1438904_at     | -0.038696719 | 6.117519089 | -0.47473679  | 0.645805944 | 0.645805944 | -5.524320372 |
| 1456027_at     | 0.044771049  | 7.894287092 | 0.474733758  | 0.645808027 | 0.645808027 | -5.524321728 |

|              |              |             |              |             |             |              |
|--------------|--------------|-------------|--------------|-------------|-------------|--------------|
| 1415887_at   | 0.037295164  | 10.88360613 | 0.474717239  | 0.645819374 | 0.645819374 | -5.524329113 |
| 1419649_s_at | 0.051843587  | 9.759074264 | 0.474630127  | 0.645879216 | 0.645879216 | -5.524368054 |
| 1421182_at   | 0.045944582  | 3.873283494 | 0.474609534  | 0.645893363 | 0.645893363 | -5.524377259 |
| 1442499_at   | -0.033253859 | 7.48698166  | -0.474531841 | 0.645946737 | 0.645946737 | -5.524411983 |
| 1446581_at   | -0.036058372 | 3.051151817 | -0.474527715 | 0.645949572 | 0.645949572 | -5.524413827 |
| 1437166_at   | 0.037034379  | 6.918886207 | 0.474504087  | 0.645965804 | 0.645965804 | -5.524424385 |
| 1451475_at   | -0.04691972  | 9.045242327 | -0.474485707 | 0.645978431 | 0.645978431 | -5.524432599 |
| 1428253_at   | 0.031157809  | 9.545198381 | 0.474446226  | 0.646005556 | 0.646005556 | -5.524450241 |
| 1425033_at   | 0.037371501  | 4.892332977 | 0.474427819  | 0.646018202 | 0.646018202 | -5.524458465 |
| 1458770_at   | -0.044890038 | 3.964648779 | -0.47441687  | 0.646025724 | 0.646025724 | -5.524463357 |
| 1429971_at   | -0.030328993 | 5.245379834 | -0.474404522 | 0.646034208 | 0.646034208 | -5.524468874 |
| 1417067_s_at | -0.064514972 | 3.749445195 | -0.474384406 | 0.646048029 | 0.646048029 | -5.524477861 |
| 1439399_a_at | 0.040515735  | 10.57095201 | 0.474334464  | 0.646082342 | 0.646082342 | -5.524500172 |
| 1444803_at   | 0.059256179  | 3.935841121 | 0.474196392  | 0.64617721  | 0.64617721  | -5.524561843 |
| 1457389_at   | -0.035326621 | 4.158693288 | -0.474159498 | 0.646202561 | 0.646202561 | -5.52457832  |
| 1437038_x_at | -0.031317878 | 3.767769295 | -0.47415814  | 0.646203494 | 0.646203494 | -5.524578926 |
| 1437307_at   | 0.050165228  | 5.958493987 | 0.474139682  | 0.646216177 | 0.646216177 | -5.524587169 |
| 1454547_at   | 0.052571251  | 5.115827645 | 0.474117302  | 0.646231555 | 0.646231555 | -5.524597162 |
| 1436295_at   | -0.033707552 | 3.860840797 | -0.474087974 | 0.646251708 | 0.646251708 | -5.524610258 |
| 1435278_at   | -0.072127453 | 6.626238432 | -0.474074507 | 0.646260962 | 0.646260962 | -5.524616271 |
| 1426885_a_at | -0.057859686 | 11.04045065 | -0.474042831 | 0.646282729 | 0.646282729 | -5.524630413 |
| 1443638_at   | -0.055586331 | 5.836886114 | -0.474019718 | 0.646298611 | 0.646298611 | -5.524640732 |
| 1420648_at   | 0.044393588  | 3.879877792 | 0.473941291  | 0.646352506 | 0.646352506 | -5.524675742 |
| 1421749_at   | 0.034345055  | 3.69896866  | 0.47392243   | 0.646365467 | 0.646365467 | -5.524684161 |
| 1456125_a_at | 0.029780449  | 13.04487704 | 0.47391558   | 0.646370175 | 0.646370175 | -5.524687218 |
| 1423813_at   | 0.030767932  | 7.203815431 | 0.473835356  | 0.646425307 | 0.646425307 | -5.524723023 |
| 1447374_at   | -0.042855285 | 5.756955696 | -0.473815795 | 0.646438751 | 0.646438751 | -5.524731753 |
| 1444629_at   | 0.040881745  | 3.617869098 | 0.473793007  | 0.646454412 | 0.646454412 | -5.524741922 |
| 1420114_s_at | 0.040976304  | 3.847263555 | 0.473743529  | 0.646488417 | 0.646488417 | -5.524764    |
| 1438045_at   | -0.034873339 | 8.867190352 | -0.473698493 | 0.646519369 | 0.646519369 | -5.524784094 |
| 1419987_at   | -0.037070353 | 4.137209054 | -0.473670108 | 0.646538878 | 0.646538878 | -5.524796758 |
| 1425756_at   | 0.046038076  | 5.391764371 | 0.47365547   | 0.646548939 | 0.646548939 | -5.524803288 |
| 1448808_a_at | 0.029621433  | 13.02493472 | 0.473649503  | 0.64655304  | 0.64655304  | -5.52480595  |
| 1460678_at   | 0.059421341  | 9.338031838 | 0.473613591  | 0.646577723 | 0.646577723 | -5.52482197  |
| 1433834_at   | 0.03262303   | 10.37206426 | 0.473607421  | 0.646581964 | 0.646581964 | -5.524824722 |
| 1436968_x_at | -0.070307405 | 3.895493904 | -0.473578762 | 0.646601662 | 0.646601662 | -5.524837506 |
| 1425826_a_at | -0.031884151 | 7.017746586 | -0.473488034 | 0.646664024 | 0.646664024 | -5.524877971 |
| 1434056_a_at | 0.05381693   | 10.52486295 | 0.473414699  | 0.646714433 | 0.646714433 | -5.524910674 |
| 1425696_at   | -0.047146327 | 5.35554323  | -0.473403146 | 0.646722375 | 0.646722375 | -5.524915825 |
| 1452024_a_at | 0.046436779  | 9.371539954 | 0.473402086  | 0.646723103 | 0.646723103 | -5.524916298 |
| 1448868_at   | -0.049100226 | 9.496210547 | -0.473398134 | 0.64672582  | 0.64672582  | -5.52491806  |
| 1419699_at   | 0.030595136  | 4.555690495 | 0.473372756  | 0.646743265 | 0.646743265 | -5.524929375 |
| 1421510_at   | 0.043002645  | 3.749523626 | 0.473349516  | 0.646759241 | 0.646759241 | -5.524939737 |
| 1425073_at   | 0.039743778  | 5.708394756 | 0.473264669  | 0.646817567 | 0.646817567 | -5.524977562 |
| 1429480_at   | 0.053179445  | 3.685405061 | 0.473260665  | 0.646820319 | 0.646820319 | -5.524979347 |
| 1430990_s_at | 0.032809006  | 7.642973183 | 0.473252306  | 0.646826066 | 0.646826066 | -5.524983073 |
| 1446496_at   | 0.078573092  | 7.319994148 | 0.473249996  | 0.646827654 | 0.646827654 | -5.524984103 |
| 1424028_at   | 0.036467633  | 8.980158742 | 0.473226174  | 0.64684403  | 0.64684403  | -5.524994721 |
| 1445349_at   | -0.049519287 | 3.619198828 | -0.473198874 | 0.646862798 | 0.646862798 | -5.525006889 |
| 1425771_at   | 0.050048764  | 4.144949258 | 0.473157677  | 0.64689112  | 0.64689112  | -5.52502525  |
| 1444708_at   | 0.035403538  | 3.235543464 | 0.473122464  | 0.646915329 | 0.646915329 | -5.525040943 |
| 1445154_at   | 0.043972936  | 4.369794483 | 0.473115199  | 0.646920323 | 0.646920323 | -5.525044181 |
| 1448235_s_at | 0.085153162  | 8.293968678 | 0.473097557  | 0.646932452 | 0.646932452 | -5.525052043 |

|              |              |             |              |             |             |              |
|--------------|--------------|-------------|--------------|-------------|-------------|--------------|
| 1438671_at   | -0.039578944 | 4.12171979  | -0.473073789 | 0.646948793 | 0.646948793 | -5.525062634 |
| 1454538_at   | 0.03077409   | 3.738515627 | 0.47303528   | 0.646975269 | 0.646975269 | -5.525079793 |
| 1441805_at   | -0.04326119  | 3.75207024  | -0.472987888 | 0.647007853 | 0.647007853 | -5.525100908 |
| 1446530_at   | -0.046094235 | 4.25821544  | -0.472979799 | 0.647013414 | 0.647013414 | -5.525104511 |
| 1419203_at   | 0.038592126  | 6.639939075 | 0.472876466  | 0.647084462 | 0.647084462 | -5.525150543 |
| 1426201_at   | 0.057284904  | 3.8841995   | 0.472869254  | 0.647089421 | 0.647089421 | -5.525153755 |
| 1450551_x_at | -0.031543901 | 3.149880722 | -0.47282621  | 0.647119017 | 0.647119017 | -5.525172927 |
| 1429099_at   | 0.035606261  | 6.507431174 | 0.472698433  | 0.64720688  | 0.64720688  | -5.525229828 |
| 1451208_at   | 0.043740377  | 9.048006315 | 0.472672939  | 0.647224411 | 0.647224411 | -5.52524118  |
| 1424115_at   | -0.03366743  | 8.647556198 | -0.472603782 | 0.647271968 | 0.647271968 | -5.525271969 |
| 1455263_at   | -0.0473541   | 6.562581275 | -0.472585801 | 0.647284333 | 0.647284333 | -5.525279973 |
| 1454282_at   | -0.04631851  | 3.940290092 | -0.472429054 | 0.64739213  | 0.64739213  | -5.52534974  |
| 1427948_a_at | 0.031700697  | 5.813864254 | 0.47241218   | 0.647403735 | 0.647403735 | -5.525357249 |
| 1433689_s_at | 0.032704662  | 13.24871278 | 0.472365457  | 0.647435869 | 0.647435869 | -5.52537804  |
| 1418363_at   | 0.032716247  | 4.862698327 | 0.472355311  | 0.647442847 | 0.647442847 | -5.525382555 |
| 1429503_at   | -0.038041389 | 8.911699319 | -0.472340261 | 0.647453198 | 0.647453198 | -5.525389251 |
| 1417385_at   | 0.038780124  | 9.863727811 | 0.47228339   | 0.647492313 | 0.647492313 | -5.525414554 |
| 1424152_at   | 0.051860777  | 4.785256333 | 0.472277975  | 0.647496037 | 0.647496037 | -5.525416963 |
| 1456366_at   | 0.033473871  | 3.281496819 | 0.472255379  | 0.647511578 | 0.647511578 | -5.525427015 |
| 1433759_at   | -0.030694055 | 9.560867915 | -0.472249949 | 0.647515313 | 0.647515313 | -5.525429431 |
| 1420803_at   | -0.038793329 | 3.544263746 | -0.472091454 | 0.647624331 | 0.647624331 | -5.525499928 |
| 1452866_at   | 0.037536576  | 10.43475099 | 0.472079595  | 0.647632488 | 0.647632488 | -5.525505202 |
| 1431392_at   | -0.046136947 | 4.460285947 | -0.472062721 | 0.647644095 | 0.647644095 | -5.525512706 |
| 1423773_at   | 0.03493714   | 10.86425281 | 0.47202933   | 0.647667064 | 0.647667064 | -5.525527554 |
| 1447062_at   | -0.039902729 | 6.762373132 | -0.471947296 | 0.647723495 | 0.647723495 | -5.525564029 |
| 1446194_at   | 0.032634191  | 6.499904939 | 0.471919055  | 0.647742922 | 0.647742922 | -5.525576584 |
| 1442552_at   | -0.034474653 | 4.372330196 | -0.47187788  | 0.647771248 | 0.647771248 | -5.525594888 |
| 1434737_at   | -0.040085753 | 7.664171356 | -0.471877145 | 0.647771753 | 0.647771753 | -5.525595215 |
| 1456777_at   | 0.030677236  | 3.206255802 | 0.471802013  | 0.64782344  | 0.64782344  | -5.525628611 |
| 1436289_x_at | 0.036732021  | 4.942294251 | 0.471779378  | 0.647839012 | 0.647839012 | -5.525638671 |
| 1439892_at   | -0.043716281 | 7.769672635 | -0.471760609 | 0.647851925 | 0.647851925 | -5.525647012 |
| 1452245_at   | 0.034444558  | 3.554963078 | 0.471750616  | 0.647858799 | 0.647858799 | -5.525651454 |
| 1450162_at   | -0.052699274 | 4.303569394 | -0.471722973 | 0.647877817 | 0.647877817 | -5.525663738 |
| 1460286_at   | 0.039468563  | 5.215500841 | 0.471689386  | 0.647900925 | 0.647900925 | -5.525678664 |
| 1419447_s_at | 0.04007543   | 7.517383503 | 0.471626312  | 0.647944321 | 0.647944321 | -5.525706689 |
| 1460141_at   | -0.032994997 | 4.232910581 | -0.471583685 | 0.647973649 | 0.647973649 | -5.525725628 |
| 1440426_at   | -0.04514164  | 4.046552202 | -0.471566903 | 0.647985196 | 0.647985196 | -5.525733083 |
| 1426100_a_at | 0.033276745  | 6.856657569 | 0.471542983  | 0.648001654 | 0.648001654 | -5.52574371  |
| 1422414_a_at | -0.059733881 | 11.05346957 | -0.471537633 | 0.648005335 | 0.648005335 | -5.525746086 |
| 1424330_at   | -0.049499712 | 6.906375052 | -0.471440108 | 0.648072439 | 0.648072439 | -5.525789405 |
| 1432116_at   | -0.036637996 | 3.99932547  | -0.4714134   | 0.648090817 | 0.648090817 | -5.525801267 |
| 1427364_a_at | 0.05800333   | 8.387677841 | 0.471388472  | 0.64810797  | 0.64810797  | -5.525812337 |
| 1436907_at   | -0.043089497 | 8.906233956 | -0.471367731 | 0.648122242 | 0.648122242 | -5.525821548 |
| 1432862_at   | -0.037382554 | 4.920752079 | -0.471351502 | 0.64813341  | 0.64813341  | -5.525828755 |
| 1421799_at   | 0.048203815  | 4.100638891 | 0.471302287  | 0.648167275 | 0.648167275 | -5.525850608 |
| 1437159_at   | 0.032793303  | 7.441233021 | 0.471300854  | 0.648168262 | 0.648168262 | -5.525851245 |
| 1429107_at   | 0.028723063  | 8.41913265  | 0.471299665  | 0.64816908  | 0.64816908  | -5.525851772 |
| 1417741_at   | -0.055756791 | 8.396008671 | -0.471286979 | 0.648177809 | 0.648177809 | -5.525857405 |
| 1417620_at   | -0.060032143 | 6.991530087 | -0.471167041 | 0.648260346 | 0.648260346 | -5.525910651 |
| 1418071_s_at | 0.034893474  | 8.550853544 | 0.471152662  | 0.648270241 | 0.648270241 | -5.525917034 |
| 1445811_at   | -0.053828237 | 5.411904609 | -0.471146617 | 0.648274401 | 0.648274401 | -5.525919717 |
| 1432825_at   | 0.056750749  | 7.206730323 | 0.471109022  | 0.648300274 | 0.648300274 | -5.525936404 |
| 1448487_at   | -0.034247943 | 7.964176792 | -0.471087191 | 0.648315299 | 0.648315299 | -5.525946093 |

|              |              |             |              |             |             |              |
|--------------|--------------|-------------|--------------|-------------|-------------|--------------|
| 1421070_at   | 0.045353368  | 6.783814621 | 0.471047064  | 0.648342914 | 0.648342914 | -5.525963902 |
| 1440817_x_at | -0.049852901 | 9.331095064 | -0.471026044 | 0.648357382 | 0.648357382 | -5.52597323  |
| 1451428_x_at | 0.036805998  | 8.531041715 | 0.470992871  | 0.648380212 | 0.648380212 | -5.525987951 |
| 1425211_at   | -0.028351647 | 7.740765072 | -0.470991493 | 0.648381161 | 0.648381161 | -5.525988562 |
| 1436727_x_at | 0.039431739  | 3.853429618 | 0.470953295  | 0.64840745  | 0.64840745  | -5.526005511 |
| 1437895_at   | 0.047226926  | 5.024248795 | 0.470912612  | 0.648435451 | 0.648435451 | -5.526023562 |
| 1430257_at   | 0.029582097  | 4.438861381 | 0.470852794  | 0.648476623 | 0.648476623 | -5.5260501   |
| 1428206_at   | -0.050274352 | 5.750500686 | -0.470801668 | 0.648511812 | 0.648511812 | -5.526072778 |
| 1444167_at   | -0.052605913 | 5.423063276 | -0.470798757 | 0.648513817 | 0.648513817 | -5.52607407  |
| 1452060_a_at | 0.040252527  | 8.9827038   | 0.470795915  | 0.648515773 | 0.648515773 | -5.52607533  |
| 1448720_at   | 0.04076898   | 9.268268092 | 0.47074042   | 0.648553971 | 0.648553971 | -5.526099944 |
| 1453122_at   | -0.032968617 | 10.21269232 | -0.470673677 | 0.648599913 | 0.648599913 | -5.526129544 |
| 1460156_at   | -0.039474157 | 3.127302905 | -0.470644631 | 0.648619907 | 0.648619907 | -5.526142424 |
| 1442540_at   | -0.040142181 | 4.111026509 | -0.470633168 | 0.648627798 | 0.648627798 | -5.526147507 |
| 1442792_x_at | -0.031099651 | 3.487697466 | -0.470612237 | 0.648642206 | 0.648642206 | -5.526156788 |
| 1454349_at   | -0.032858858 | 3.457199722 | -0.470597729 | 0.648652193 | 0.648652193 | -5.526163221 |
| 1443140_at   | -0.03646993  | 3.248042887 | -0.470589589 | 0.648657797 | 0.648657797 | -5.52616683  |
| 1432889_at   | -0.051701074 | 4.370096806 | -0.470557929 | 0.648679591 | 0.648679591 | -5.526180867 |
| 1438652_x_at | -0.042838476 | 9.479431379 | -0.470530592 | 0.64869841  | 0.64869841  | -5.526192986 |
| 1427471_at   | 0.046711622  | 7.688516774 | 0.470504657  | 0.648716264 | 0.648716264 | -5.526204484 |
| 1420996_at   | -0.042344808 | 8.374399512 | -0.470487215 | 0.648728272 | 0.648728272 | -5.526212216 |
| 1458073_at   | -0.066670888 | 5.737015449 | -0.470425664 | 0.648770645 | 0.648770645 | -5.526239499 |
| 1439161_at   | -0.033194574 | 8.554031865 | -0.47039621  | 0.648790922 | 0.648790922 | -5.526252553 |
| 1428684_at   | 0.03365837   | 8.290814045 | 0.470328729  | 0.648837381 | 0.648837381 | -5.526282459 |
| 1436374_x_at | -0.041452975 | 5.155655481 | -0.470302297 | 0.648855579 | 0.648855579 | -5.526294172 |
| 1432314_at   | -0.031594574 | 3.548670044 | -0.470294436 | 0.648860991 | 0.648860991 | -5.526297655 |
| 1422442_at   | 0.034221794  | 10.39664388 | 0.470274971  | 0.648874393 | 0.648874393 | -5.526306281 |
| 1428494_a_at | 0.036144586  | 10.04999289 | 0.470239826  | 0.64889859  | 0.64889859  | -5.526321853 |
| 1432261_at   | -0.046244136 | 4.604739528 | -0.470202543 | 0.64892426  | 0.64892426  | -5.526338371 |
| 1452833_at   | 0.037391627  | 9.752545013 | 0.470198973  | 0.648926718 | 0.648926718 | -5.526339952 |
| 1458047_at   | 0.037902804  | 3.518827667 | 0.470103126  | 0.648992712 | 0.648992712 | -5.526382412 |
| 1460295_s_at | 0.050682635  | 7.678884063 | 0.470050956  | 0.649028634 | 0.649028634 | -5.526405518 |
| 1439406_x_at | 0.066306929  | 4.811160264 | 0.469957826  | 0.649092763 | 0.649092763 | -5.526446762 |
| 1440816_x_at | 0.054290389  | 9.815197153 | 0.469918542  | 0.649119814 | 0.649119814 | -5.526464157 |
| 1455099_at   | -0.053751067 | 5.678531933 | -0.469879286 | 0.649146847 | 0.649146847 | -5.526481537 |
| 1444142_at   | 0.068769587  | 4.38305044  | 0.469864481  | 0.649157042 | 0.649157042 | -5.526488092 |
| 1426612_at   | 0.031718818  | 10.57740248 | 0.469841863  | 0.649172618 | 0.649172618 | -5.526498105 |
| 1441633_at   | 0.033087854  | 3.446559085 | 0.469839484  | 0.649174256 | 0.649174256 | -5.526499159 |
| 1451793_at   | 0.037402166  | 5.743821372 | 0.469808501  | 0.649195593 | 0.649195593 | -5.526512875 |
| 1451341_s_at | -0.059162353 | 6.065040134 | -0.469790629 | 0.649207901 | 0.649207901 | -5.526520786 |
| 1431905_s_at | 0.062414149  | 4.464336709 | 0.46975105   | 0.649235158 | 0.649235158 | -5.526538306 |
| 1445656_at   | 0.041834787  | 3.725688125 | 0.46974114   | 0.649241982 | 0.649241982 | -5.526542692 |
| 1422384_at   | -0.048239152 | 3.761769483 | -0.469715698 | 0.649259504 | 0.649259504 | -5.526553953 |
| 1432611_at   | -0.033029242 | 4.63268461  | -0.469708358 | 0.649264559 | 0.649264559 | -5.526557202 |
| 1427858_at   | 0.047741376  | 3.380446131 | 0.469706485  | 0.649265849 | 0.649265849 | -5.526558031 |
| 1459301_at   | 0.041605204  | 9.025010515 | 0.469559615  | 0.649367001 | 0.649367001 | -5.526623024 |
| 1459313_at   | -0.030723582 | 3.452909355 | -0.469558502 | 0.649367767 | 0.649367767 | -5.526623517 |
| 1423295_at   | -0.083568476 | 6.273656841 | -0.469534166 | 0.649384529 | 0.649384529 | -5.526634284 |
| 1431389_at   | -0.031861862 | 6.235840942 | -0.469517555 | 0.64939597  | 0.64939597  | -5.526641633 |
| 1441294_at   | 0.034283864  | 2.996468879 | 0.469504001  | 0.649405305 | 0.649405305 | -5.52664763  |
| 1447527_at   | -0.034787227 | 5.815191563 | -0.469479852 | 0.649421938 | 0.649421938 | -5.526658313 |
| 1437849_x_at | -0.031774332 | 9.063826673 | -0.469400536 | 0.64947657  | 0.64947657  | -5.526693399 |
| 1455774_at   | -0.035898667 | 6.127089908 | -0.469387185 | 0.649485767 | 0.649485767 | -5.526699304 |

|              |              |             |              |             |             |              |
|--------------|--------------|-------------|--------------|-------------|-------------|--------------|
| 1438889_at   | -0.067855286 | 4.75525074  | -0.46937783  | 0.64949221  | 0.64949221  | -5.526703442 |
| 1444707_at   | -0.032354368 | 3.894043522 | -0.469351141 | 0.649510594 | 0.649510594 | -5.526715246 |
| 1453048_at   | -0.034097351 | 7.717425199 | -0.469340796 | 0.64951772  | 0.64951772  | -5.526719821 |
| 1420400_at   | -0.033140313 | 3.267438731 | -0.469334748 | 0.649521886 | 0.649521886 | -5.526722496 |
| 1431907_at   | -0.034070827 | 4.480516706 | -0.469324821 | 0.649528724 | 0.649528724 | -5.526726886 |
| 1424327_at   | 0.029350032  | 7.380392454 | 0.469323244  | 0.64952981  | 0.64952981  | -5.526727583 |
| 1425673_at   | 0.034526194  | 8.65188925  | 0.469225172  | 0.649597367 | 0.649597367 | -5.526770951 |
| 1459892_at   | -0.04322937  | 3.555291284 | -0.469224095 | 0.649598108 | 0.649598108 | -5.526771427 |
| 1442108_at   | 0.067925478  | 5.805720483 | 0.469210309  | 0.649607605 | 0.649607605 | -5.526777523 |
| 1428166_at   | 0.031168681  | 7.947030147 | 0.469185814  | 0.649624479 | 0.649624479 | -5.526788353 |
| 1434547_at   | -0.030566939 | 8.626323068 | -0.469174144 | 0.649632518 | 0.649632518 | -5.526793513 |
| 1455048_at   | -0.035952512 | 9.670204264 | -0.46913344  | 0.649660559 | 0.649660559 | -5.526811508 |
| 1429162_at   | 0.065640883  | 6.655972286 | 0.469104584  | 0.649680437 | 0.649680437 | -5.526824264 |
| 1427136_s_at | -0.0513193   | 9.479194444 | -0.469099995 | 0.649683599 | 0.649683599 | -5.526826292 |
| 1430674_at   | -0.060251604 | 4.081877511 | -0.46909008  | 0.64969043  | 0.64969043  | -5.526830675 |
| 1438369_x_at | -0.062717759 | 6.760788422 | -0.469088935 | 0.649691218 | 0.649691218 | -5.526831181 |
| 1456796_at   | 0.030518078  | 5.252950361 | 0.468999749  | 0.649752661 | 0.649752661 | -5.526870601 |
| 1452809_at   | 0.027545372  | 7.271317143 | 0.468966683  | 0.649775442 | 0.649775442 | -5.526885215 |
| 1434919_at   | -0.034269957 | 7.784735119 | -0.468943941 | 0.64979111  | 0.64979111  | -5.526895265 |
| 1455622_at   | -0.057389798 | 8.221297948 | -0.468937973 | 0.649795222 | 0.649795222 | -5.526897902 |
| 1446217_at   | -0.033968642 | 4.09351539  | -0.468905225 | 0.649817784 | 0.649817784 | -5.526912373 |
| 1426745_at   | -0.030431121 | 8.64135795  | -0.468878342 | 0.649836305 | 0.649836305 | -5.526924251 |
| 1458290_at   | 0.039729316  | 6.563865639 | 0.468853539  | 0.649853394 | 0.649853394 | -5.52693521  |
| 1441502_at   | -0.065026082 | 3.549939643 | -0.468842665 | 0.649860887 | 0.649860887 | -5.526940015 |
| 1446331_at   | -0.045797931 | 6.837730454 | -0.468812454 | 0.649881702 | 0.649881702 | -5.526953362 |
| 1420961_a_at | -0.03253437  | 5.965096367 | -0.468782944 | 0.649902035 | 0.649902035 | -5.526966399 |
| 1417094_at   | -0.046941975 | 9.003386532 | -0.46876621  | 0.649913565 | 0.649913565 | -5.526973791 |
| 1455872_at   | 0.066521809  | 6.815672608 | 0.468755162  | 0.649921177 | 0.649921177 | -5.526978672 |
| 1439813_at   | 0.041817902  | 7.231008784 | 0.468720556  | 0.649945022 | 0.649945022 | -5.526993958 |
| 1433249_at   | -0.044837555 | 3.468503457 | -0.468697396 | 0.64996098  | 0.64996098  | -5.527004188 |
| 1428133_at   | 0.031940916  | 8.5831854   | 0.468655595  | 0.649989783 | 0.649989783 | -5.52702265  |
| 1448090_at   | 0.039918672  | 3.556854742 | 0.468651773  | 0.649992417 | 0.649992417 | -5.527024338 |
| 1441992_at   | -0.067562066 | 8.316201105 | -0.46853345  | 0.650073951 | 0.650073951 | -5.527076589 |
| 1428877_at   | 0.038374721  | 10.74993116 | 0.468495154  | 0.650100342 | 0.650100342 | -5.527093497 |
| 1438235_at   | 0.032728877  | 7.186756639 | 0.468487017  | 0.650105949 | 0.650105949 | -5.52709709  |
| 1427019_at   | -0.060688501 | 9.040293229 | -0.468466579 | 0.650120033 | 0.650120033 | -5.527106113 |
| 1455963_at   | -0.083455049 | 4.246850198 | -0.468435748 | 0.65014128  | 0.65014128  | -5.527119724 |
| 1428528_at   | 0.033018938  | 8.851302628 | 0.468421521  | 0.650151084 | 0.650151084 | -5.527126004 |
| 1429064_at   | -0.03833226  | 8.726605799 | -0.468400893 | 0.6501653   | 0.6501653   | -5.52713511  |
| 1436028_at   | 0.035259708  | 9.161152488 | 0.468381549  | 0.650178631 | 0.650178631 | -5.527143649 |
| 1428920_at   | -0.044118591 | 8.264802898 | -0.468354302 | 0.650197408 | 0.650197408 | -5.527155675 |
| 1448862_at   | -0.029536187 | 8.157630378 | -0.468237577 | 0.650277854 | 0.650277854 | -5.52720719  |
| 1456959_at   | 0.038271889  | 4.801772835 | 0.468223055  | 0.650287862 | 0.650287862 | -5.527213598 |
| 1437266_at   | -0.036959872 | 4.917706479 | -0.468199111 | 0.650304365 | 0.650304365 | -5.527224163 |
| 1449426_a_at | 0.052881479  | 3.639966962 | 0.468163271  | 0.650329067 | 0.650329067 | -5.527239977 |
| 1447122_at   | 0.039313521  | 7.43644693  | 0.468150329  | 0.650337987 | 0.650337987 | -5.527245687 |
| 1417506_at   | 0.033564686  | 9.148885257 | 0.468130566  | 0.650351609 | 0.650351609 | -5.527254406 |
| 1457257_x_at | -0.031645291 | 3.477661185 | -0.468129424 | 0.650352396 | 0.650352396 | -5.52725491  |
| 1416561_at   | 0.050646198  | 3.395519907 | 0.468126418  | 0.650354468 | 0.650354468 | -5.527256236 |
| 1419124_at   | 0.058465873  | 4.113608078 | 0.468071258  | 0.650392487 | 0.650392487 | -5.52728057  |
| 1420639_at   | 0.039748386  | 5.860417271 | 0.467972967  | 0.650460237 | 0.650460237 | -5.527323924 |
| 1448732_at   | -0.03802774  | 10.61112955 | -0.467953886 | 0.65047339  | 0.65047339  | -5.52733234  |
| 1425589_at   | -0.059878593 | 4.399753407 | -0.467929883 | 0.650489935 | 0.650489935 | -5.527342926 |

|              |              |             |              |             |             |              |
|--------------|--------------|-------------|--------------|-------------|-------------|--------------|
| 1443118_at   | 0.041866016  | 3.434940462 | 0.467891437  | 0.650516437 | 0.650516437 | -5.52735988  |
| 1435003_at   | -0.034083008 | 9.325879799 | -0.467871689 | 0.650530049 | 0.650530049 | -5.527368588 |
| 1424145_at   | -0.040165602 | 7.997911827 | -0.467834855 | 0.650555441 | 0.650555441 | -5.527384829 |
| 1454135_at   | 0.039538723  | 3.820665023 | 0.467793888  | 0.650583681 | 0.650583681 | -5.527402891 |
| 1454851_at   | 0.034985854  | 10.26718264 | 0.467738262  | 0.650622029 | 0.650622029 | -5.527427414 |
| 1421669_at   | -0.034140289 | 3.40535228  | -0.467724811 | 0.650631301 | 0.650631301 | -5.527433344 |
| 1437945_x_at | 0.032490551  | 10.96367626 | 0.467699303  | 0.650648886 | 0.650648886 | -5.527444588 |
| 1432256_at   | -0.036172896 | 3.554130456 | -0.467670078 | 0.650669034 | 0.650669034 | -5.52745747  |
| 1426894_s_at | 0.035576427  | 8.853080705 | 0.467624265  | 0.650700618 | 0.650700618 | -5.527477662 |
| 1423770_at   | -0.036426258 | 6.39909555  | -0.467600556 | 0.650716964 | 0.650716964 | -5.527488111 |
| 1447465_at   | -0.057413536 | 5.217152396 | -0.467574436 | 0.650734971 | 0.650734971 | -5.527499621 |
| 1450996_at   | 0.040687185  | 3.578911029 | 0.467560089  | 0.650744863 | 0.650744863 | -5.527505944 |
| 1432820_at   | -0.03239137  | 7.785235211 | -0.467519329 | 0.650772965 | 0.650772965 | -5.527523905 |
| 1434906_at   | 0.04941168   | 4.019367605 | 0.467512083  | 0.650777961 | 0.650777961 | -5.527527098 |
| 1426673_at   | -0.041105813 | 6.44166709  | -0.467496861 | 0.650788456 | 0.650788456 | -5.527533805 |
| 1435641_at   | 0.036948064  | 7.162544019 | 0.467475311  | 0.650803314 | 0.650803314 | -5.5275433   |
| 1438062_at   | -0.03910853  | 7.540875909 | -0.467406443 | 0.650850797 | 0.650850797 | -5.527573641 |
| 1417085_at   | -0.052167796 | 4.384983048 | -0.467343765 | 0.650894014 | 0.650894014 | -5.527601251 |
| 1446547_at   | -0.04505285  | 4.840541242 | -0.46730106  | 0.65092346  | 0.65092346  | -5.52762006  |
| 1452530_a_at | -0.035039659 | 5.784399282 | -0.467282884 | 0.650935994 | 0.650935994 | -5.527628066 |
| 1441776_at   | 0.034877038  | 6.278350159 | 0.46722098   | 0.65097868  | 0.65097868  | -5.527655328 |
| 1430682_at   | 0.036006066  | 3.71786482  | 0.46719554   | 0.650996222 | 0.650996222 | -5.527666531 |
| 1422439_a_at | 0.033356916  | 10.50803571 | 0.467195375  | 0.650996336 | 0.650996336 | -5.527666603 |
| 1420886_a_at | 0.031278711  | 11.403944   | 0.467141672  | 0.651033368 | 0.651033368 | -5.52769025  |
| 1445613_at   | -0.038970022 | 5.583978715 | -0.467139498 | 0.651034868 | 0.651034868 | -5.527691207 |
| 1423141_at   | -0.084404659 | 6.979416997 | -0.467010397 | 0.651123897 | 0.651123897 | -5.527748042 |
| 1455696_a_at | 0.057010615  | 9.875448372 | 0.467002301  | 0.65112948  | 0.65112948  | -5.527751606 |
| 1432702_at   | -0.038420647 | 5.839690674 | -0.466989303 | 0.651138444 | 0.651138444 | -5.527757327 |
| 1451190_a_at | 0.073678705  | 9.862834696 | 0.46691801   | 0.651187612 | 0.651187612 | -5.527788705 |
| 1419125_at   | -0.052423084 | 6.907763471 | -0.46690349  | 0.651197626 | 0.651197626 | -5.527795095 |
| 1419806_at   | -0.03654961  | 7.244187105 | -0.466854097 | 0.651231691 | 0.651231691 | -5.527816831 |
| 1417052_at   | 0.035640985  | 10.41547141 | 0.466831934  | 0.651246977 | 0.651246977 | -5.527826584 |
| 1457249_at   | 0.075631437  | 6.044732351 | 0.466771181  | 0.651288879 | 0.651288879 | -5.527853315 |
| 1444616_x_at | 0.036791896  | 4.875949089 | 0.466759325  | 0.651297056 | 0.651297056 | -5.527858531 |
| 1417533_a_at | -0.041434958 | 10.8954578  | -0.466731208 | 0.651316449 | 0.651316449 | -5.527870901 |
| 1444072_at   | 0.056487106  | 4.537783807 | 0.466700732  | 0.651337469 | 0.651337469 | -5.527884307 |
| 1453934_at   | 0.048489499  | 5.368085154 | 0.466627785  | 0.651387785 | 0.651387785 | -5.527916395 |
| 1419545_a_at | 0.046571431  | 9.667018518 | 0.466605175  | 0.651403381 | 0.651403381 | -5.527926339 |
| 1429834_a_at | 0.053124464  | 6.972839526 | 0.466560758  | 0.651434019 | 0.651434019 | -5.527945874 |
| 1423814_at   | -0.031276869 | 8.205207752 | -0.466509962 | 0.651469058 | 0.651469058 | -5.527968212 |
| 1417435_at   | 0.035210939  | 8.938303298 | 0.466467073  | 0.651498644 | 0.651498644 | -5.52798707  |
| 1427177_at   | -0.063195278 | 8.077424731 | -0.466450976 | 0.651509748 | 0.651509748 | -5.527994148 |
| 1452568_at   | 0.034530912  | 3.297291004 | 0.46644241   | 0.651515657 | 0.651515657 | -5.527997914 |
| 1434552_at   | 0.038762674  | 8.285396054 | 0.466403465  | 0.651542523 | 0.651542523 | -5.528015036 |
| 1432576_at   | 0.046982733  | 6.335694164 | 0.466377068  | 0.651560732 | 0.651560732 | -5.528026641 |
| 1418207_at   | -0.034840927 | 6.081550945 | -0.466371941 | 0.651564269 | 0.651564269 | -5.528028895 |
| 1419424_at   | -0.050123694 | 3.959055075 | -0.466336541 | 0.651588691 | 0.651588691 | -5.528044457 |
| 1441408_at   | -0.038617207 | 4.082079525 | -0.466324499 | 0.651596998 | 0.651596998 | -5.52804975  |
| 1453492_at   | 0.045378885  | 4.653431742 | 0.46629079   | 0.651620253 | 0.651620253 | -5.528064567 |
| 1421272_at   | -0.044198297 | 6.993468544 | -0.466290473 | 0.651620472 | 0.651620472 | -5.528064706 |
| 1434036_at   | 0.031340791  | 9.333635184 | 0.46625732   | 0.651643344 | 0.651643344 | -5.528079278 |
| 1427630_x_at | 0.043337092  | 5.240940427 | 0.466204315  | 0.651679913 | 0.651679913 | -5.528102572 |
| 1446620_at   | -0.05177748  | 4.53022796  | -0.466196465 | 0.651685328 | 0.651685328 | -5.528106022 |

|              |              |             |              |             |             |              |
|--------------|--------------|-------------|--------------|-------------|-------------|--------------|
| 1448622_at   | 0.040373508  | 10.14502245 | 0.466181618  | 0.651695571 | 0.651695571 | -5.528112546 |
| 1445375_at   | -0.034793067 | 6.892645505 | -0.466164991 | 0.651707043 | 0.651707043 | -5.528119853 |
| 1433492_at   | -0.040217593 | 8.305209952 | -0.466146223 | 0.651719992 | 0.651719992 | -5.5281281   |
| 1450631_x_at | 0.038588184  | 3.378563557 | 0.46611878   | 0.651738926 | 0.651738926 | -5.528140158 |
| 1426428_at   | -0.038471621 | 7.424038844 | -0.466112381 | 0.65174334  | 0.65174334  | -5.528142969 |
| 1422382_at   | 0.038505707  | 4.681373179 | 0.466034031  | 0.651797399 | 0.651797399 | -5.528177392 |
| 1420239_x_at | -0.033738957 | 3.020580796 | -0.465988481 | 0.651828828 | 0.651828828 | -5.528197402 |
| 1416422_a_at | 0.069144009  | 7.98904577  | 0.465956394  | 0.651850968 | 0.651850968 | -5.528211496 |
| 1438679_at   | -0.06727454  | 6.005359641 | -0.465916741 | 0.651878329 | 0.651878329 | -5.528228912 |
| 1456169_at   | 0.037461158  | 5.87103333  | 0.465898267  | 0.651891076 | 0.651891076 | -5.528237026 |
| 1425711_a_at | -0.056419453 | 9.301801605 | -0.465882803 | 0.651901746 | 0.651901746 | -5.528243817 |
| 1427406_at   | 0.037581848  | 7.716673868 | 0.465870988  | 0.651909899 | 0.651909899 | -5.528249006 |
| 1416149_at   | 0.070126719  | 4.034314808 | 0.465866477  | 0.651913012 | 0.651913012 | -5.528250987 |
| 1450525_at   | 0.040035417  | 5.775883921 | 0.465864577  | 0.651914323 | 0.651914323 | -5.528251821 |
| 1442230_at   | 0.049851704  | 3.433940219 | 0.465858004  | 0.651918859 | 0.651918859 | -5.528254708 |
| 1415675_at   | 0.039502238  | 8.86560869  | 0.465831896  | 0.651936874 | 0.651936874 | -5.528266173 |
| 1426713_s_at | 0.044713009  | 9.548213732 | 0.465788658  | 0.651966711 | 0.651966711 | -5.528285159 |
| 1449727_x_at | -0.037786671 | 3.492123013 | -0.465748151 | 0.651994663 | 0.651994663 | -5.528302944 |
| 1426011_a_at | 0.033779722  | 9.974888264 | 0.465735936  | 0.652003092 | 0.652003092 | -5.528308307 |
| 1429112_at   | -0.043068607 | 5.070863634 | -0.465641732 | 0.652068102 | 0.652068102 | -5.528349662 |
| 1425209_at   | 0.043206416  | 5.061466411 | 0.46557954   | 0.652111022 | 0.652111022 | -5.52837696  |
| 1437053_x_at | -0.045789994 | 3.425461009 | -0.465512654 | 0.652157183 | 0.652157183 | -5.528406314 |
| 1419250_a_at | -0.033710164 | 6.677224637 | -0.465469052 | 0.652187275 | 0.652187275 | -5.528425448 |
| 1443532_at   | -0.029660054 | 4.718928676 | -0.465462229 | 0.652191985 | 0.652191985 | -5.528428442 |
| 1427905_at   | -0.032477752 | 7.418367119 | -0.465402856 | 0.652232962 | 0.652232962 | -5.528454492 |
| 1420434_at   | 0.036191012  | 4.154146542 | 0.465385786  | 0.652244745 | 0.652244745 | -5.528461982 |
| 1424442_a_at | 0.031533594  | 10.48318236 | 0.46538374   | 0.652246157 | 0.652246157 | -5.52846288  |
| 1458925_at   | -0.051752292 | 3.786897186 | -0.465347145 | 0.652271415 | 0.652271415 | -5.528478934 |
| 1434550_at   | 0.042513028  | 6.816573887 | 0.465293154  | 0.65230868  | 0.65230868  | -5.528502618 |
| 1424001_at   | -0.029508764 | 8.710847768 | -0.46528281  | 0.65231582  | 0.65231582  | -5.528507155 |
| 1416119_at   | 0.029444691  | 12.21162154 | 0.465248273  | 0.652339659 | 0.652339659 | -5.528522304 |
| 1439584_at   | -0.069006867 | 5.105164775 | -0.465201463 | 0.65237197  | 0.65237197  | -5.528542834 |
| 1452119_at   | 0.038677582  | 7.632464199 | 0.465184947  | 0.65238337  | 0.65238337  | -5.528550077 |
| 1434073_at   | 0.040697966  | 8.87403602  | 0.465137268  | 0.652416282 | 0.652416282 | -5.528570985 |
| 1457398_at   | -0.044973352 | 7.093915415 | -0.46503258  | 0.652488549 | 0.652488549 | -5.528616887 |
| 1428818_at   | 0.046297867  | 4.229361539 | 0.465018699  | 0.652498131 | 0.652498131 | -5.528622972 |
| 1457549_at   | -0.042642845 | 4.390510003 | -0.464954384 | 0.65254253  | 0.65254253  | -5.528651166 |
| 1427516_a_at | 0.035094059  | 8.798886189 | 0.464949571  | 0.652545853 | 0.652545853 | -5.528653275 |
| 1415733_a_at | -0.032538814 | 10.30900145 | -0.464797729 | 0.652650682 | 0.652650682 | -5.528719823 |
| 1440334_at   | 0.046656629  | 4.813136048 | 0.464787144  | 0.652657989 | 0.652657989 | -5.528724461 |
| 1430398_at   | -0.046059285 | 5.468618393 | -0.464701888 | 0.652716852 | 0.652716852 | -5.528761816 |
| 1453811_at   | -0.050198647 | 5.465973862 | -0.464699055 | 0.652718807 | 0.652718807 | -5.528763057 |
| 1438623_x_at | -0.051676323 | 4.28756365  | -0.464650011 | 0.65275267  | 0.65275267  | -5.528784543 |
| 1452726_a_at | 0.035957941  | 8.594634714 | 0.464635757  | 0.652762512 | 0.652762512 | -5.528790787 |
| 1416838_at   | 0.035805354  | 9.007504381 | 0.464626029  | 0.652769229 | 0.652769229 | -5.528795049 |
| 1423213_at   | 0.040979439  | 7.769629972 | 0.46462209   | 0.652771949 | 0.652771949 | -5.528796774 |
| 1440646_at   | 0.052450191  | 4.655718453 | 0.464607402  | 0.65278209  | 0.65278209  | -5.528803208 |
| 1449937_at   | 0.033900172  | 3.898591692 | 0.464540287  | 0.652828431 | 0.652828431 | -5.528832604 |
| 1456388_at   | 0.031354546  | 9.434283586 | 0.46442749   | 0.652906319 | 0.652906319 | -5.528882    |
| 1423720_a_at | -0.039707283 | 10.5029419  | -0.464414542 | 0.65291526  | 0.65291526  | -5.52888767  |
| 1450079_at   | -0.054570397 | 11.06858817 | -0.464397901 | 0.652926752 | 0.652926752 | -5.528894956 |
| 1446724_at   | -0.028303378 | 3.586426361 | -0.464342927 | 0.652964714 | 0.652964714 | -5.528919025 |
| 1417518_at   | -0.041027257 | 5.038281904 | -0.464323284 | 0.652978279 | 0.652978279 | -5.528927624 |

|              |              |             |              |             |             |              |
|--------------|--------------|-------------|--------------|-------------|-------------|--------------|
| 1437006_x_at | 0.032812919  | 4.832172526 | 0.46430211   | 0.652992901 | 0.652992901 | -5.528936893 |
| 1454925_x_at | 0.035322897  | 11.08466202 | 0.464267409  | 0.653016865 | 0.653016865 | -5.528952083 |
| 1435175_at   | 0.048757707  | 7.447638051 | 0.464236923  | 0.653037919 | 0.653037919 | -5.528965427 |
| 1455286_at   | -0.041421796 | 10.51754679 | -0.464188189 | 0.653071574 | 0.653071574 | -5.528986757 |
| 1443877_a_at | 0.055589832  | 4.539900409 | 0.46409432   | 0.653136403 | 0.653136403 | -5.529027835 |
| 1432300_at   | 0.037374254  | 4.0619284   | 0.464078     | 0.653147675 | 0.653147675 | -5.529034976 |
| 1426419_at   | -0.057211332 | 9.590388788 | -0.464016256 | 0.653190319 | 0.653190319 | -5.529061991 |
| 1442003_at   | 0.054122446  | 7.347095959 | 0.464001986  | 0.653200175 | 0.653200175 | -5.529068234 |
| 1419256_at   | 0.053896874  | 9.483734064 | 0.463986452  | 0.653210904 | 0.653210904 | -5.52907503  |
| 1419704_at   | -0.047683966 | 3.336328063 | -0.463969402 | 0.653222681 | 0.653222681 | -5.529082489 |
| 1434291_a_at | 0.05187188   | 8.941982823 | 0.463941014  | 0.653242288 | 0.653242288 | -5.529094907 |
| 1432112_at   | 0.034793284  | 3.601886538 | 0.463819424  | 0.653326272 | 0.653326272 | -5.529148087 |
| 1425873_a_at | 0.038361677  | 4.133646879 | 0.463796007  | 0.653342448 | 0.653342448 | -5.529158328 |
| 1418975_at   | -0.043141208 | 7.692185927 | -0.463786381 | 0.653349097 | 0.653349097 | -5.529162538 |
| 1420198_at   | 0.044773629  | 3.954821207 | 0.46378476   | 0.653350217 | 0.653350217 | -5.529163246 |
| 1416417_a_at | 0.030498048  | 11.11599369 | 0.463754246  | 0.653371295 | 0.653371295 | -5.529176589 |
| 1426920_x_at | -0.029480172 | 3.638813926 | -0.463646177 | 0.653445947 | 0.653445947 | -5.529223839 |
| 1431338_at   | -0.043504464 | 3.893641768 | -0.463515898 | 0.653535947 | 0.653535947 | -5.529280785 |
| 1442930_at   | 0.046314488  | 4.955972681 | 0.463476398  | 0.653563236 | 0.653563236 | -5.529298049 |
| 1434085_at   | -0.032323218 | 7.972202454 | -0.463473483 | 0.65356525  | 0.65356525  | -5.529299322 |
| 1416276_a_at | 0.028275754  | 13.75833263 | 0.463449021  | 0.65358215  | 0.65358215  | -5.529310012 |
| 1432347_at   | -0.029364829 | 4.685547854 | -0.463411483 | 0.653608084 | 0.653608084 | -5.529326416 |
| 1436953_at   | 0.036620815  | 7.910317052 | 0.463378702  | 0.653630732 | 0.653630732 | -5.529340739 |
| 1434511_at   | -0.03045601  | 9.065121642 | -0.463309587 | 0.653678485 | 0.653678485 | -5.529370935 |
| 1448185_at   | -0.032677063 | 9.071566086 | -0.463284326 | 0.653695938 | 0.653695938 | -5.529381971 |
| 1443130_at   | 0.039955707  | 3.902536792 | 0.463268372  | 0.653706961 | 0.653706961 | -5.52938894  |
| 1454415_at   | -0.036167787 | 5.96673568  | -0.463253951 | 0.653716925 | 0.653716925 | -5.529395239 |
| 1436422_at   | 0.043692474  | 8.196716501 | 0.463181191  | 0.653767198 | 0.653767198 | -5.52942702  |
| 1448089_at   | -0.043965661 | 3.697181939 | -0.463140222 | 0.653795507 | 0.653795507 | -5.529444912 |
| 1422992_s_at | -0.067195514 | 4.795710015 | -0.463131522 | 0.653801518 | 0.653801518 | -5.529448712 |
| 1452840_at   | 0.063547706  | 6.587275992 | 0.463105849  | 0.653819258 | 0.653819258 | -5.529459923 |
| 1457667_x_at | -0.0295723   | 4.034909161 | -0.46307336  | 0.653841708 | 0.653841708 | -5.52947411  |
| 1458155_at   | -0.049591469 | 3.704533531 | -0.4630524   | 0.653856191 | 0.653856191 | -5.529483262 |
| 1450285_at   | 0.052671804  | 3.573372201 | 0.463035208  | 0.653868071 | 0.653868071 | -5.529490769 |
| 1421583_at   | 0.038973078  | 3.152986368 | 0.463013403  | 0.653883139 | 0.653883139 | -5.529500289 |
| 1449721_at   | -0.048373721 | 4.562334018 | -0.462994012 | 0.653896538 | 0.653896538 | -5.529508755 |
| 1421312_a_at | -0.0627902   | 7.385144507 | -0.462968732 | 0.653914008 | 0.653914008 | -5.529519792 |
| 1426280_at   | -0.058856156 | 7.224385265 | -0.462967042 | 0.653915176 | 0.653915176 | -5.529520529 |
| 1429258_at   | 0.05347937   | 5.309012542 | 0.46293813   | 0.653935155 | 0.653935155 | -5.529533151 |
| 1442291_at   | 0.052258554  | 5.031407385 | 0.462923018  | 0.653945599 | 0.653945599 | -5.529539748 |
| 1460089_at   | 0.0413117    | 3.678257923 | 0.462850542  | 0.653995684 | 0.653995684 | -5.529571383 |
| 1427247_at   | -0.06878663  | 6.568049624 | -0.462782235 | 0.654042891 | 0.654042891 | -5.529601194 |
| 1434081_at   | -0.034759803 | 8.610688429 | -0.462707605 | 0.654094468 | 0.654094468 | -5.529633759 |
| 1456480_at   | 0.043632455  | 6.138066206 | 0.462704725  | 0.654096459 | 0.654096459 | -5.529635016 |
| 1443352_at   | 0.040609751  | 4.891508242 | 0.462559872  | 0.654196575 | 0.654196575 | -5.52969821  |
| 1442815_at   | 0.044640631  | 5.178439769 | 0.462478371  | 0.654252907 | 0.654252907 | -5.529733757 |
| 1429043_at   | 0.046348377  | 8.438429401 | 0.462458014  | 0.654266978 | 0.654266978 | -5.529742635 |
| 1450854_at   | -0.08140165  | 8.152171338 | -0.462440891 | 0.654278814 | 0.654278814 | -5.529750102 |
| 1430759_at   | -0.035202472 | 3.385126891 | -0.46243632  | 0.654281974 | 0.654281974 | -5.529752096 |
| 1428823_at   | 0.030014661  | 8.677781424 | 0.462431211  | 0.654285505 | 0.654285505 | -5.529754324 |
| 1422663_at   | 0.034446025  | 6.531916414 | 0.462418358  | 0.654294389 | 0.654294389 | -5.529759928 |
| 1438260_at   | -0.049613221 | 4.384654078 | -0.462367707 | 0.654329401 | 0.654329401 | -5.529782015 |
| 1423739_x_at | 0.030096129  | 10.49231431 | 0.462301932  | 0.654374869 | 0.654374869 | -5.529810692 |



|              |              |             |              |             |             |              |
|--------------|--------------|-------------|--------------|-------------|-------------|--------------|
| 1416820_at   | -0.037067574 | 6.251512999 | -0.462261031 | 0.654403142 | 0.654403142 | -5.529828523 |
| 1444650_at   | 0.055291015  | 5.147130545 | 0.4622568    | 0.654406068 | 0.654406068 | -5.529830367 |
| 1454652_at   | 0.028615653  | 10.63003678 | 0.462238824  | 0.654418494 | 0.654418494 | -5.529838203 |
| 1435021_at   | -0.090363491 | 6.828469399 | -0.462236754 | 0.654419925 | 0.654419925 | -5.529839106 |
| 1422212_at   | -0.040177033 | 6.746338622 | -0.46218623  | 0.654454852 | 0.654454852 | -5.529861128 |
| 1428862_at   | 0.034306324  | 7.250527642 | 0.462109413  | 0.654507957 | 0.654507957 | -5.529894607 |
| 1443481_at   | -0.038376042 | 7.171085206 | -0.462079185 | 0.654528855 | 0.654528855 | -5.52990778  |
| 1415831_at   | 0.03273147   | 10.87178513 | 0.462067947  | 0.654536624 | 0.654536624 | -5.529912677 |
| 1450187_a_at | 0.042190777  | 8.313506596 | 0.462065131  | 0.654538572 | 0.654538572 | -5.529913904 |
| 1445382_at   | -0.034858506 | 4.82090819  | -0.4620564   | 0.654544608 | 0.654544608 | -5.529917708 |
| 1419801_x_at | -0.043050459 | 3.057118703 | -0.461967359 | 0.654606168 | 0.654606168 | -5.529956504 |
| 1452942_at   | 0.029844184  | 9.582943302 | 0.461915745  | 0.654641853 | 0.654641853 | -5.529978989 |
| 1428582_at   | -0.033451059 | 8.944066387 | -0.461880026 | 0.654666549 | 0.654666549 | -5.529994548 |
| 1429173_at   | 0.039970155  | 7.068610545 | 0.461875767  | 0.654669495 | 0.654669495 | -5.529996404 |
| 1448644_at   | -0.030610446 | 8.445315365 | -0.461834698 | 0.654697891 | 0.654697891 | -5.530014292 |
| 1419499_at   | 0.033408131  | 9.065935504 | 0.461827346  | 0.654702974 | 0.654702974 | -5.530017494 |
| 1435133_at   | -0.043305401 | 7.611600285 | -0.461792884 | 0.654726802 | 0.654726802 | -5.530032503 |
| 1449452_a_at | -0.03976512  | 3.592618146 | -0.46179272  | 0.654726916 | 0.654726916 | -5.530032575 |
| 1445237_at   | 0.039519266  | 3.495739902 | 0.461787545  | 0.654730494 | 0.654730494 | -5.530034828 |
| 1420005_s_at | -0.033207867 | 3.280685933 | -0.461624231 | 0.654843421 | 0.654843421 | -5.53010594  |
| 1449328_at   | -0.038673867 | 3.677261238 | -0.461614596 | 0.654850084 | 0.654850084 | -5.530110135 |
| 1452317_at   | -0.042253633 | 4.358740425 | -0.461577824 | 0.654875512 | 0.654875512 | -5.530126143 |
| 1421895_at   | -0.094167551 | 9.310789294 | -0.461562338 | 0.654886221 | 0.654886221 | -5.530132884 |
| 1436837_at   | 0.036477495  | 3.15170715  | 0.46155893   | 0.654888578 | 0.654888578 | -5.530134368 |
| 1428939_s_at | -0.062696018 | 8.556836158 | -0.461549491 | 0.654895105 | 0.654895105 | -5.530138477 |
| 1436896_at   | 0.035377411  | 8.102439241 | 0.461529151  | 0.654909171 | 0.654909171 | -5.53014733  |
| 1444538_at   | 0.030765809  | 7.488146207 | 0.461501816  | 0.654928074 | 0.654928074 | -5.530159228 |
| 1422846_at   | 0.051090049  | 4.627681448 | 0.461464402  | 0.654953948 | 0.654953948 | -5.530175512 |
| 1449213_at   | -0.031666215 | 9.278995644 | -0.461455177 | 0.654960328 | 0.654960328 | -5.530179527 |
| 1418252_at   | -0.035442356 | 5.276681661 | -0.461407082 | 0.654993588 | 0.654993588 | -5.530200457 |
| 1431664_at   | 0.030015674  | 4.045260675 | 0.461367256  | 0.655021131 | 0.655021131 | -5.530217787 |
| 1427694_at   | -0.047020114 | 3.460006321 | -0.46136622  | 0.655021848 | 0.655021848 | -5.530218238 |
| 1455915_at   | 0.035553681  | 8.405015168 | 0.461356044  | 0.655028886 | 0.655028886 | -5.530222665 |
| 1428982_at   | 0.035580372  | 9.993387457 | 0.461301116  | 0.655066874 | 0.655066874 | -5.530246564 |
| 1422761_at   | 0.084126976  | 4.572641702 | 0.461296068  | 0.655070365 | 0.655070365 | -5.53024876  |
| 1455691_at   | -0.047732024 | 6.320801577 | -0.461285862 | 0.655077424 | 0.655077424 | -5.530253201 |
| 1456501_at   | -0.038009773 | 6.901404522 | -0.461264508 | 0.655092193 | 0.655092193 | -5.53026249  |
| 1436538_at   | 0.0352255    | 6.989367281 | 0.461189687  | 0.655143942 | 0.655143942 | -5.530295038 |
| 1434607_at   | -0.034830266 | 8.142168269 | -0.461107228 | 0.655200977 | 0.655200977 | -5.530330902 |
| 1460626_at   | -0.035535905 | 7.484180642 | -0.461084178 | 0.65521692  | 0.65521692  | -5.530340926 |
| 1455712_at   | 0.036263578  | 5.151086953 | 0.461062388  | 0.655231991 | 0.655231991 | -5.530350402 |
| 1439044_at   | 0.056095592  | 9.633342841 | 0.461002776  | 0.655273226 | 0.655273226 | -5.530376323 |
| 1421082_s_at | -0.027797315 | 11.02393625 | -0.461002109 | 0.655273687 | 0.655273687 | -5.530376613 |
| 1449430_a_at | -0.034017827 | 3.815773858 | -0.46098498  | 0.655285536 | 0.655285536 | -5.53038406  |
| 1430896_s_at | -0.04087011  | 6.764511621 | -0.460973384 | 0.655293557 | 0.655293557 | -5.530389102 |
| 1421422_at   | -0.03805144  | 3.510861535 | -0.460959763 | 0.655302978 | 0.655302978 | -5.530395024 |
| 1420136_a_at | 0.040821843  | 6.176217213 | 0.460933062  | 0.655321449 | 0.655321449 | -5.530406632 |
| 1443990_at   | 0.044648473  | 4.48246792  | 0.46090892   | 0.655338149 | 0.655338149 | -5.530417128 |
| 1425148_a_at | 0.050287608  | 9.981374303 | 0.460873685  | 0.655362523 | 0.655362523 | -5.530432444 |
| 1424405_at   | 0.037024992  | 7.936112577 | 0.460865608  | 0.65536811  | 0.65536811  | -5.530435955 |
| 1447243_at   | -0.061222678 | 3.451578714 | -0.46079984  | 0.655413607 | 0.655413607 | -5.530464541 |
| 1435395_s_at | 0.028999106  | 12.04869578 | 0.460792388  | 0.655418762 | 0.655418762 | -5.53046778  |
| 1450732_a_at | 0.040154352  | 9.235895859 | 0.46074899   | 0.655448785 | 0.655448785 | -5.53048664  |

|              |              |             |              |             |             |              |
|--------------|--------------|-------------|--------------|-------------|-------------|--------------|
| 1449101_at   | 0.102056767  | 6.18704678  | 0.460745162  | 0.655451433 | 0.655451433 | -5.530488304 |
| 1416494_at   | -0.03975605  | 9.829770628 | -0.460734278 | 0.655458963 | 0.655458963 | -5.530493034 |
| 1422331_at   | 0.065271378  | 5.166934169 | 0.460711325  | 0.655474842 | 0.655474842 | -5.530503008 |
| 1446171_at   | -0.036656799 | 3.704778303 | -0.460677316 | 0.65549837  | 0.65549837  | -5.530517785 |
| 1449435_at   | 0.031853727  | 8.661650067 | 0.460667451  | 0.655505195 | 0.655505195 | -5.530522072 |
| 1428234_at   | -0.058964618 | 7.190072167 | -0.46063712  | 0.655526179 | 0.655526179 | -5.53053525  |
| 1458249_at   | 0.063733093  | 4.228017966 | 0.46062913   | 0.655531707 | 0.655531707 | -5.530538722 |
| 1448196_at   | -0.032577161 | 8.909418988 | -0.460620966 | 0.655537356 | 0.655537356 | -5.530542269 |
| 1439677_at   | -0.048542974 | 4.750329245 | -0.460608813 | 0.655545763 | 0.655545763 | -5.530547549 |
| 1430749_at   | 0.067853407  | 4.41594484  | 0.460574576  | 0.65556945  | 0.65556945  | -5.530562422 |
| 1449307_at   | -0.039559396 | 5.954295908 | -0.460547279 | 0.655588337 | 0.655588337 | -5.53057428  |
| 1415768_a_at | 0.045838259  | 10.22446756 | 0.46049788   | 0.655622515 | 0.655622515 | -5.530595738 |
| 1453054_at   | 0.038844218  | 7.061279752 | 0.460457975  | 0.655650125 | 0.655650125 | -5.53061307  |
| 1437297_at   | -0.040444744 | 9.756916434 | -0.460423681 | 0.655673854 | 0.655673854 | -5.530627964 |
| 1431760_a_at | 0.036849895  | 6.210889742 | 0.460378671  | 0.655704997 | 0.655704997 | -5.53064751  |
| 1451896_a_at | -0.07692502  | 8.994960243 | -0.46031394  | 0.655749787 | 0.655749787 | -5.530675616 |
| 1424944_at   | 0.032517285  | 3.652608368 | 0.460313063  | 0.655750394 | 0.655750394 | -5.530675997 |
| 1431608_at   | -0.045510233 | 3.756401576 | -0.460294096 | 0.655763518 | 0.655763518 | -5.530684232 |
| 1419135_at   | 0.07758403   | 4.638347542 | 0.460284275  | 0.655770314 | 0.655770314 | -5.530688496 |
| 1419131_at   | 0.043867627  | 3.4253635   | 0.460277929  | 0.655774706 | 0.655774706 | -5.530691252 |
| 1443364_at   | 0.046305563  | 3.583922447 | 0.460265293  | 0.655783449 | 0.655783449 | -5.530696737 |
| 1445317_at   | 0.040935956  | 5.538424553 | 0.460169312  | 0.655849867 | 0.655849867 | -5.530738402 |
| 1454165_at   | 0.051801231  | 3.381645192 | 0.460122203  | 0.655882467 | 0.655882467 | -5.530758849 |
| 1416314_at   | 0.038512666  | 4.724129067 | 0.460099158  | 0.655898414 | 0.655898414 | -5.530768851 |
| 1442874_at   | 0.052657011  | 3.673233735 | 0.460082802  | 0.655909733 | 0.655909733 | -5.530775949 |
| 1451912_a_at | -0.057674551 | 7.580930443 | -0.460076369 | 0.655914185 | 0.655914185 | -5.530778741 |
| 1439141_at   | 0.033725096  | 4.070229755 | 0.460054745  | 0.65592915  | 0.65592915  | -5.530788125 |
| 1428993_at   | -0.037820089 | 4.989350634 | -0.459996546 | 0.655969426 | 0.655969426 | -5.530813379 |
| 1436081_a_at | -0.031254464 | 8.635228081 | -0.459987547 | 0.655975655 | 0.655975655 | -5.530817284 |
| 1434686_at   | 0.030247633  | 8.919855238 | 0.459965816  | 0.655990694 | 0.655990694 | -5.530826712 |
| 1446675_at   | -0.038503132 | 4.449854599 | -0.459958891 | 0.655995486 | 0.655995486 | -5.530829716 |
| 1417119_at   | -0.037458556 | 7.592362233 | -0.459949476 | 0.656002002 | 0.656002002 | -5.530833801 |
| 1434766_at   | 0.057656202  | 5.427744064 | 0.459929378  | 0.656015912 | 0.656015912 | -5.530842521 |
| 1446859_at   | 0.048794875  | 3.361464383 | 0.459905693  | 0.656032304 | 0.656032304 | -5.530852796 |
| 1442268_a_at | -0.033357057 | 6.994163723 | -0.45982638  | 0.656087197 | 0.656087197 | -5.530887201 |
| 1439554_at   | 0.072202498  | 7.377296079 | 0.459811731  | 0.656097336 | 0.656097336 | -5.530893555 |
| 1416890_at   | 0.031492312  | 8.531950014 | 0.459681364  | 0.65618757  | 0.65618757  | -5.530950091 |
| 1431933_a_at | -0.043244068 | 5.27546151  | -0.459654983 | 0.65620583  | 0.65620583  | -5.53096153  |
| 1437615_s_at | 0.052246829  | 8.437659413 | 0.459616556  | 0.656232429 | 0.656232429 | -5.530978191 |
| 1433516_a_at | -0.029264638 | 10.99089703 | -0.459606729 | 0.656239231 | 0.656239231 | -5.530982452 |
| 1440778_x_at | 0.037105832  | 6.795666224 | 0.459577452  | 0.656259496 | 0.656259496 | -5.530995144 |
| 1452455_at   | 0.029935586  | 3.545355411 | 0.459555526  | 0.656274674 | 0.656274674 | -5.53100465  |
| 1437099_x_at | 0.042754722  | 9.584063394 | 0.45952378   | 0.65629665  | 0.65629665  | -5.531018411 |
| 1430404_at   | -0.04899702  | 7.353102555 | -0.459523711 | 0.656296697 | 0.656296697 | -5.531018441 |
| 1434568_at   | 0.033774773  | 8.157576254 | 0.459490407  | 0.656319752 | 0.656319752 | -5.531032877 |
| 1441864_x_at | 0.057021848  | 3.566994654 | 0.459410726  | 0.656374911 | 0.656374911 | -5.531067412 |
| 1453996_a_at | 0.040453523  | 3.24867058  | 0.459382734  | 0.656394289 | 0.656394289 | -5.531079543 |
| 1416163_at   | 0.027894537  | 9.546726761 | 0.459366131  | 0.656405782 | 0.656405782 | -5.531086737 |
| 1420118_s_at | -0.050682813 | 3.856657909 | -0.459307755 | 0.656446196 | 0.656446196 | -5.531112032 |
| 1439037_at   | 0.06313786   | 5.837810452 | 0.459296998  | 0.656453643 | 0.656453643 | -5.531116693 |
| 1417728_at   | -0.034487945 | 8.713829035 | -0.459292212 | 0.656456956 | 0.656456956 | -5.531118766 |
| 1416997_a_at | -0.034622037 | 6.610381672 | -0.459291101 | 0.656457725 | 0.656457725 | -5.531119248 |
| 1428388_at   | -0.028250859 | 11.699792   | -0.459268325 | 0.656473493 | 0.656473493 | -5.531129116 |

|              |              |             |              |             |             |              |
|--------------|--------------|-------------|--------------|-------------|-------------|--------------|
| 1441354_at   | 0.03300811   | 7.085052152 | 0.459216924  | 0.65650908  | 0.65650908  | -5.531151384 |
| 1451626_x_at | 0.077224289  | 7.25073145  | 0.459211051  | 0.656513146 | 0.656513146 | -5.531153928 |
| 1456518_at   | 0.057248968  | 5.546344332 | 0.459208158  | 0.656515149 | 0.656515149 | -5.531155181 |
| 1427811_at   | 0.031591579  | 3.604171211 | 0.459192201  | 0.656526197 | 0.656526197 | -5.531162094 |
| 1416434_at   | -0.039646207 | 3.711677885 | -0.45913832  | 0.6565635   | 0.6565635   | -5.531185432 |
| 1420405_at   | -0.057410627 | 5.099908304 | -0.459133051 | 0.656567149 | 0.656567149 | -5.531187714 |
| 1442469_at   | -0.048107592 | 4.061895412 | -0.459100104 | 0.65658996  | 0.65658996  | -5.531201984 |
| 1426820_at   | 0.033234283  | 9.692334036 | 0.459080537  | 0.656603508 | 0.656603508 | -5.531210458 |
| 1421450_a_at | 0.033696858  | 8.605419029 | 0.459075382  | 0.656607077 | 0.656607077 | -5.531212691 |
| 1450742_at   | 0.036959261  | 7.397067653 | 0.459039566  | 0.656631875 | 0.656631875 | -5.531228201 |
| 1434761_at   | -0.057286075 | 5.947075551 | -0.459024777 | 0.656642115 | 0.656642115 | -5.531234605 |
| 1436686_at   | -0.032563829 | 3.429532139 | -0.459011574 | 0.656651257 | 0.656651257 | -5.531240322 |
| 1420009_at   | 0.037385473  | 3.714757716 | 0.459006081  | 0.65665506  | 0.65665506  | -5.531242701 |
| 1421915_a_at | -0.045026202 | 5.759134155 | -0.458997601 | 0.656660932 | 0.656660932 | -5.531246373 |
| 1425831_at   | 0.081311417  | 7.2913582   | 0.458985681  | 0.656669186 | 0.656669186 | -5.531251534 |
| 1451530_at   | 0.035601981  | 6.116763736 | 0.458944161  | 0.656697935 | 0.656697935 | -5.531269511 |
| 1428352_at   | -0.035486902 | 5.497590791 | -0.458929374 | 0.656708174 | 0.656708174 | -5.531275913 |
| 1438296_at   | 0.04027441   | 5.333627046 | 0.458908749  | 0.656722456 | 0.656722456 | -5.531284843 |
| 1438360_x_at | 0.082093776  | 8.054874446 | 0.45884743   | 0.656764916 | 0.656764916 | -5.531311388 |
| 1433944_at   | 0.064899274  | 5.154699281 | 0.458809524  | 0.656791164 | 0.656791164 | -5.531327795 |
| 1436338_at   | 0.037205552  | 8.674887355 | 0.458687365  | 0.656875759 | 0.656875759 | -5.531380663 |
| 1452745_at   | -0.055086608 | 7.529649813 | -0.458660204 | 0.656894568 | 0.656894568 | -5.531392416 |
| 1429081_at   | 0.031453128  | 9.170968064 | 0.458629569  | 0.656915784 | 0.656915784 | -5.531405671 |
| 1428546_at   | 0.036731319  | 9.570918147 | 0.458599715  | 0.656936458 | 0.656936458 | -5.531418588 |
| 1431894_at   | -0.061882935 | 4.943158508 | -0.458593062 | 0.656941066 | 0.656941066 | -5.531421466 |
| 1455483_at   | 0.029466358  | 8.271617226 | 0.458578028  | 0.656951478 | 0.656951478 | -5.53142797  |
| 1451383_a_at | 0.055921407  | 7.988993773 | 0.458536264  | 0.656980402 | 0.656980402 | -5.531446038 |
| 1447850_x_at | 0.035622873  | 3.382855262 | 0.458515091  | 0.656995066 | 0.656995066 | -5.531455197 |
| 1430489_at   | -0.042268263 | 3.700019464 | -0.458498734 | 0.657006394 | 0.657006394 | -5.531462272 |
| 1450470_at   | -0.06206657  | 4.789302362 | -0.458471715 | 0.657025107 | 0.657025107 | -5.531473959 |
| 1426152_a_at | 0.042334014  | 5.436840609 | 0.45842693   | 0.657056125 | 0.657056125 | -5.531493329 |
| 1424366_at   | -0.031577673 | 8.104822651 | -0.458408781 | 0.657068695 | 0.657068695 | -5.531501179 |
| 1447483_s_at | -0.045729519 | 7.718711689 | -0.458312596 | 0.657135315 | 0.657135315 | -5.531542772 |
| 1454685_at   | -0.039043576 | 4.116500914 | -0.458293065 | 0.657148844 | 0.657148844 | -5.531551217 |
| 1427151_at   | 0.085488546  | 6.81367955  | 0.458254023  | 0.657175886 | 0.657175886 | -5.531568097 |
| 1424237_at   | 0.032401533  | 9.413912473 | 0.458224777  | 0.657196144 | 0.657196144 | -5.531580741 |
| 1423485_at   | 0.040187411  | 6.638313557 | 0.458071371  | 0.657302408 | 0.657302408 | -5.531647049 |
| 1448898_at   | -0.044983459 | 4.692421944 | -0.457981874 | 0.657364407 | 0.657364407 | -5.531685724 |
| 1435368_a_at | -0.053644279 | 9.105178793 | -0.457980113 | 0.657365627 | 0.657365627 | -5.531686485 |
| 1453507_at   | -0.039501151 | 5.390456697 | -0.457931817 | 0.657399084 | 0.657399084 | -5.531707352 |
| 1453512_at   | 0.030247043  | 8.279962003 | 0.457931487  | 0.657399313 | 0.657399313 | -5.531707494 |
| 1452462_a_at | 0.042162073  | 7.637175517 | 0.457907795  | 0.657415727 | 0.657415727 | -5.53171773  |
| 1420598_x_at | -0.027782052 | 7.742097426 | -0.457869359 | 0.657442355 | 0.657442355 | -5.531734335 |
| 1449380_at   | 0.057806131  | 5.447092734 | 0.45784286   | 0.657460713 | 0.657460713 | -5.531745782 |
| 1423937_at   | -0.030370461 | 8.786343476 | -0.457773408 | 0.657508831 | 0.657508831 | -5.531775781 |
| 1433069_at   | -0.053620731 | 4.163211282 | -0.457665276 | 0.65758375  | 0.65758375  | -5.531822479 |
| 1425634_a_at | -0.065506117 | 4.070781041 | -0.457652166 | 0.657592833 | 0.657592833 | -5.531828139 |
| 1427339_at   | 0.041504813  | 3.911399388 | 0.457613967  | 0.6576193   | 0.6576193   | -5.531844633 |
| 1420052_x_at | -0.031284673 | 5.999706939 | -0.457593603 | 0.65763341  | 0.65763341  | -5.531853425 |
| 1418736_at   | 0.037124238  | 8.180373048 | 0.457591901  | 0.657634589 | 0.657634589 | -5.53185416  |
| 1459718_x_at | -0.038186133 | 3.413177752 | -0.457528479 | 0.657678534 | 0.657678534 | -5.53188154  |
| 1452408_at   | 0.048890065  | 3.692013969 | 0.457497874  | 0.657699741 | 0.657699741 | -5.531894751 |
| 1424822_at   | 0.058524028  | 5.699774715 | 0.457461273  | 0.657725103 | 0.657725103 | -5.53191055  |

|              |              |             |              |             |             |              |
|--------------|--------------|-------------|--------------|-------------|-------------|--------------|
| 1417901_a_at | 0.036930515  | 7.292258956 | 0.457432526  | 0.657745023 | 0.657745023 | -5.531922957 |
| 1447356_at   | -0.034590789 | 3.67433298  | -0.457398853 | 0.657768357 | 0.657768357 | -5.53193749  |
| 1432566_at   | 0.037889878  | 5.187413786 | 0.45739226   | 0.657772925 | 0.657772925 | -5.531940335 |
| 1445999_at   | -0.037386168 | 6.068155976 | -0.457385445 | 0.657777648 | 0.657777648 | -5.531943277 |
| 1448726_at   | 0.042114922  | 7.338242802 | 0.457381104  | 0.657780656 | 0.657780656 | -5.53194515  |
| 1457025_at   | -0.032961442 | 3.176146046 | -0.4573606   | 0.657794865 | 0.657794865 | -5.531953998 |
| 1436728_s_at | 0.029317661  | 7.851020706 | 0.457332916  | 0.657814049 | 0.657814049 | -5.531965945 |
| 1448296_x_at | -0.037476395 | 7.076137675 | -0.457314088 | 0.657827097 | 0.657827097 | -5.531974069 |
| 1445723_at   | 0.053528372  | 5.268525143 | 0.457279104  | 0.65785134  | 0.65785134  | -5.531989164 |
| 1434562_at   | 0.032948445  | 8.891074234 | 0.457209666  | 0.657899462 | 0.657899462 | -5.532019122 |
| 1455954_x_at | -0.03253693  | 7.121362876 | -0.457209317 | 0.657899703 | 0.657899703 | -5.532019272 |
| 1438991_x_at | 0.033511674  | 12.44862027 | 0.457203938  | 0.657903431 | 0.657903431 | -5.532021592 |
| 1423455_at   | 0.028512123  | 13.32662261 | 0.457196887  | 0.657908317 | 0.657908317 | -5.532024634 |
| 1437809_x_at | 0.040556313  | 3.610744827 | 0.457189221  | 0.65791363  | 0.65791363  | -5.532027941 |
| 1436671_at   | 0.030185998  | 4.22423666  | 0.457186023  | 0.657915847 | 0.657915847 | -5.532029321 |
| 1443217_at   | 0.047227766  | 4.069284911 | 0.457166677  | 0.657929254 | 0.657929254 | -5.532037666 |
| 1440659_at   | 0.036632165  | 6.285506218 | 0.457146715  | 0.657943089 | 0.657943089 | -5.532046277 |
| 1428280_at   | 0.05485573   | 8.603695143 | 0.457039401  | 0.658017463 | 0.658017463 | -5.532092561 |
| 1431267_at   | 0.0523372    | 3.794360478 | 0.457039084  | 0.658017684 | 0.658017684 | -5.532092698 |
| 1448516_at   | -0.037333816 | 8.847090758 | -0.457029352 | 0.658024428 | 0.658024428 | -5.532096894 |
| 1452182_at   | -0.031285321 | 9.469741125 | -0.457024306 | 0.658027926 | 0.658027926 | -5.53209907  |
| 1451342_at   | 0.038916699  | 9.514147413 | 0.457009453  | 0.65803822  | 0.65803822  | -5.532105475 |
| 1416000_a_at | 0.027932269  | 12.54025766 | 0.456997947  | 0.658046195 | 0.658046195 | -5.532110437 |
| 1424072_at   | -0.046275029 | 6.411010337 | -0.456996546 | 0.658047166 | 0.658047166 | -5.532111041 |
| 1420174_s_at | 0.051212343  | 6.63437859  | 0.456993361  | 0.658049374 | 0.658049374 | -5.532112415 |
| 1442557_at   | 0.031671017  | 4.652506332 | 0.456985541  | 0.658054794 | 0.658054794 | -5.532115787 |
| 1428688_at   | 0.032502932  | 8.458593014 | 0.456969466  | 0.658065935 | 0.658065935 | -5.532122718 |
| 1439520_at   | -0.073152203 | 7.450589265 | -0.456956019 | 0.658075255 | 0.658075255 | -5.532128516 |
| 1441836_x_at | 0.03657664   | 3.822534335 | 0.456881072  | 0.658127203 | 0.658127203 | -5.532160829 |
| 1460648_at   | -0.054686909 | 8.390427716 | -0.456835046 | 0.658159106 | 0.658159106 | -5.53218067  |
| 1420623_x_at | -0.028945987 | 13.31142924 | -0.456824332 | 0.658166532 | 0.658166532 | -5.532185288 |
| 1428881_at   | -0.037126008 | 8.835006445 | -0.456819821 | 0.658169658 | 0.658169658 | -5.532187232 |
| 1436845_at   | 0.040225567  | 7.808122365 | 0.456683461  | 0.65826418  | 0.65826418  | -5.532246002 |
| 1436507_at   | 0.034426992  | 6.344108964 | 0.456670586  | 0.658273106 | 0.658273106 | -5.53225155  |
| 1423895_a_at | 0.065562043  | 9.400590208 | 0.456659155  | 0.658281029 | 0.658281029 | -5.532256476 |
| 1442054_at   | 0.028975112  | 6.993590956 | 0.456653563  | 0.658284906 | 0.658284906 | -5.532258886 |
| 1422607_at   | -0.061660003 | 6.798459333 | -0.456587968 | 0.658330378 | 0.658330378 | -5.532287149 |
| 1423848_at   | 0.030142742  | 8.94587188  | 0.456565578  | 0.6583459   | 0.6583459   | -5.532296795 |
| 1433053_at   | -0.042283455 | 5.176280619 | -0.456551724 | 0.658355504 | 0.658355504 | -5.532302763 |
| 1443944_at   | 0.037787512  | 4.950080214 | 0.456529763  | 0.658370728 | 0.658370728 | -5.532312224 |
| 1421526_at   | -0.047449599 | 3.862197063 | -0.456526537 | 0.658372964 | 0.658372964 | -5.532313614 |
| 1442490_at   | 0.050785982  | 3.77772698  | 0.456526323  | 0.658373113 | 0.658373113 | -5.532313706 |
| 1429770_at   | -0.065724325 | 4.902030973 | -0.456513424 | 0.658382055 | 0.658382055 | -5.532319263 |
| 1457039_at   | 0.040038487  | 4.41326007  | 0.456482135  | 0.658403747 | 0.658403747 | -5.532332741 |
| 1441632_at   | 0.036982199  | 4.907633485 | 0.45647347   | 0.658409754 | 0.658409754 | -5.532336473 |
| 1421406_at   | 0.032667372  | 3.757300227 | 0.456437763  | 0.658434509 | 0.658434509 | -5.532351853 |
| 1432478_a_at | 0.04688823   | 6.537231783 | 0.456307451  | 0.658524855 | 0.658524855 | -5.532407972 |
| 1445431_at   | -0.047197559 | 5.562194774 | -0.456299367 | 0.65853046  | 0.65853046  | -5.532411453 |
| 1424199_at   | 0.030018147  | 8.591566442 | 0.456289693  | 0.658537168 | 0.658537168 | -5.532415618 |
| 1437737_at   | 0.06931995   | 6.725335547 | 0.456284397  | 0.658540839 | 0.658540839 | -5.532417898 |
| 1432924_at   | 0.039833864  | 6.518523251 | 0.456266458  | 0.658553278 | 0.658553278 | -5.532425622 |
| 1416467_at   | 0.03137711   | 10.91069365 | 0.456260669  | 0.658557291 | 0.658557291 | -5.532428114 |
| 1452616_s_at | 0.030296547  | 9.993941507 | 0.456201748  | 0.658598145 | 0.658598145 | -5.532453481 |

|              |              |             |              |             |             |              |
|--------------|--------------|-------------|--------------|-------------|-------------|--------------|
| 1448840_at   | -0.031321863 | 6.057172975 | -0.456194673 | 0.65860305  | 0.65860305  | -5.532456527 |
| 1435655_at   | -0.030025642 | 9.402292731 | -0.456189504 | 0.658606634 | 0.658606634 | -5.532458752 |
| 1424359_at   | 0.040816285  | 6.905779614 | 0.456158682  | 0.658628006 | 0.658628006 | -5.53247202  |
| 1425086_a_at | 0.03935593   | 3.405176252 | 0.456156779  | 0.658629325 | 0.658629325 | -5.532472839 |
| 1438910_a_at | -0.040367775 | 8.011551311 | -0.456069248 | 0.658690018 | 0.658690018 | -5.532510514 |
| 1460683_at   | -0.044679212 | 5.024513773 | -0.456068821 | 0.658690315 | 0.658690315 | -5.532510698 |
| 1417186_at   | 0.030143384  | 11.09427915 | 0.456054066  | 0.658700546 | 0.658700546 | -5.532517048 |
| 1454630_at   | 0.055781266  | 8.132575501 | 0.456046675  | 0.658705671 | 0.658705671 | -5.532520229 |
| 1459832_s_at | -0.037515725 | 10.08209046 | -0.456008885 | 0.658731876 | 0.658731876 | -5.532536491 |
| 1440241_at   | -0.032216674 | 4.452581769 | -0.455995527 | 0.658741139 | 0.658741139 | -5.532542239 |
| 1450378_at   | -0.044741152 | 6.671388353 | -0.455981722 | 0.658750712 | 0.658750712 | -5.53254818  |
| 1447821_at   | 0.03250713   | 7.310007557 | 0.455949244  | 0.658773233 | 0.658773233 | -5.532562154 |
| 1422129_at   | -0.033334924 | 6.0844879   | -0.455834466 | 0.658852829 | 0.658852829 | -5.532611534 |
| 1443487_at   | -0.03263938  | 6.547887265 | -0.45582001  | 0.658862854 | 0.658862854 | -5.532617752 |
| 1433163_at   | 0.039281287  | 5.711148298 | 0.455816237  | 0.658865471 | 0.658865471 | -5.532619375 |
| 1437308_s_at | 0.046497366  | 10.50301717 | 0.455802044  | 0.658875314 | 0.658875314 | -5.53262548  |
| 1456206_at   | 0.035747972  | 4.043437978 | 0.455779245  | 0.658891125 | 0.658891125 | -5.532635287 |
| 1423458_at   | -0.030383238 | 4.092012992 | -0.455770352 | 0.658897293 | 0.658897293 | -5.532639112 |
| 1439260_a_at | -0.062661095 | 4.856833329 | -0.455637129 | 0.658989687 | 0.658989687 | -5.532696404 |
| 1453171_s_at | -0.030525262 | 9.199602409 | -0.455636641 | 0.658990026 | 0.658990026 | -5.532696614 |
| 1429794_a_at | 0.036606005  | 5.055516769 | 0.455635062  | 0.658991121 | 0.658991121 | -5.532697293 |
| 1428981_at   | 0.036391817  | 3.562936735 | 0.455586632  | 0.65902471  | 0.65902471  | -5.532718116 |
| 1430972_x_at | 0.039450021  | 4.400210797 | 0.455485685  | 0.659094727 | 0.659094727 | -5.532761513 |
| 1439873_at   | -0.039428761 | 6.449550702 | -0.455449852 | 0.659119582 | 0.659119582 | -5.532776915 |
| 1431619_a_at | 0.029853654  | 8.368129164 | 0.455332968  | 0.659200657 | 0.659200657 | -5.532827148 |
| 1448019_at   | 0.046382092  | 5.184496071 | 0.455312324  | 0.659214977 | 0.659214977 | -5.532836019 |
| 1444971_at   | 0.045694655  | 7.5698431   | 0.455284509  | 0.659234272 | 0.659234272 | -5.532847971 |
| 1420264_at   | -0.049083024 | 3.9694007   | -0.455263805 | 0.659248634 | 0.659248634 | -5.532856867 |
| 1445626_at   | -0.038467279 | 3.867410131 | -0.455233098 | 0.659269935 | 0.659269935 | -5.53287006  |
| 1441676_at   | 0.051899871  | 5.712646748 | 0.45521261   | 0.659284148 | 0.659284148 | -5.532878862 |
| 1454694_a_at | 0.032051761  | 11.10823368 | 0.455189872  | 0.659299921 | 0.659299921 | -5.532888629 |
| 1435726_at   | 0.051652518  | 3.861563484 | 0.455117472  | 0.659350147 | 0.659350147 | -5.532919729 |
| 1419753_at   | 0.032796258  | 7.38133646  | 0.455057748  | 0.659391581 | 0.659391581 | -5.532945381 |
| 1445275_at   | -0.03575835  | 3.623241413 | -0.455053353 | 0.65939463  | 0.65939463  | -5.532947268 |
| 1441148_at   | -0.03701628  | 6.778196794 | -0.455024467 | 0.659414669 | 0.659414669 | -5.532959673 |
| 1421775_at   | -0.04171365  | 3.523894349 | -0.454977734 | 0.659447092 | 0.659447092 | -5.532979741 |
| 1444520_at   | -0.06055914  | 4.250157944 | -0.454960834 | 0.659458817 | 0.659458817 | -5.532986998 |
| 1427917_s_at | 0.034733202  | 9.648202741 | 0.454927832  | 0.659481714 | 0.659481714 | -5.533001168 |
| 1445089_at   | -0.046356572 | 3.362972648 | -0.45490313  | 0.659498852 | 0.659498852 | -5.533011773 |
| 1439712_at   | 0.045099504  | 6.416532092 | 0.454880329  | 0.659514672 | 0.659514672 | -5.533021562 |
| 1432438_at   | -0.072301672 | 5.00928304  | -0.454879726 | 0.65951509  | 0.65951509  | -5.533021821 |
| 1420726_x_at | -0.066686705 | 6.087629142 | -0.454856954 | 0.65953089  | 0.65953089  | -5.533031597 |
| 1447491_at   | -0.048363087 | 6.187744934 | -0.45478952  | 0.659577678 | 0.659577678 | -5.533060544 |
| 1446632_at   | 0.041836824  | 5.280203234 | 0.454626724  | 0.659690638 | 0.659690638 | -5.533130408 |
| 1424209_at   | 0.037352719  | 9.294113048 | 0.45461489   | 0.65969885  | 0.65969885  | -5.533135486 |
| 1457021_x_at | -0.048025786 | 4.111918596 | -0.454608561 | 0.659703242 | 0.659703242 | -5.533138201 |
| 1444618_at   | -0.036393795 | 3.358967245 | -0.454533393 | 0.659755403 | 0.659755403 | -5.533170451 |
| 1459835_s_at | 0.106579454  | 8.979410675 | 0.454520853  | 0.659764105 | 0.659764105 | -5.53317583  |
| 1450686_at   | 0.037974596  | 7.527231964 | 0.454505894  | 0.659774486 | 0.659774486 | -5.533182248 |
| 1436308_at   | -0.036467603 | 9.156780859 | -0.454495253 | 0.65978187  | 0.65978187  | -5.533186812 |
| 1450865_s_at | -0.031391247 | 9.667171914 | -0.454478978 | 0.659793164 | 0.659793164 | -5.533193793 |
| 1457950_at   | -0.044008831 | 3.610904974 | -0.454456794 | 0.659808559 | 0.659808559 | -5.533203309 |
| 1419585_at   | 0.049222663  | 6.546337485 | 0.454447531  | 0.659814987 | 0.659814987 | -5.533207282 |

|              |              |             |              |             |             |              |
|--------------|--------------|-------------|--------------|-------------|-------------|--------------|
| 1422655_at   | 0.100670573  | 6.578188589 | 0.454420266  | 0.659833908 | 0.659833908 | -5.533218976 |
| 1450848_at   | -0.036543415 | 10.26906246 | -0.454417403 | 0.659835895 | 0.659835895 | -5.533220204 |
| 1439663_at   | 0.058169796  | 8.090270672 | 0.454412641  | 0.6598392   | 0.6598392   | -5.533222247 |
| 1444934_at   | 0.034275468  | 6.456221653 | 0.454390388  | 0.659854643 | 0.659854643 | -5.53323179  |
| 1452108_at   | 0.029010071  | 4.85610046  | 0.454280891  | 0.659930635 | 0.659930635 | -5.533278745 |
| 1423290_at   | -0.10578699  | 7.400249425 | -0.454232297 | 0.65996436  | 0.65996436  | -5.533299579 |
| 1455788_x_at | -0.034830255 | 10.13232897 | -0.454206279 | 0.659982418 | 0.659982418 | -5.533310734 |
| 1432808_at   | 0.036426761  | 5.329652078 | 0.454192263  | 0.659992146 | 0.659992146 | -5.533316743 |
| 1425620_at   | -0.049718159 | 6.082082558 | -0.45416364  | 0.660012012 | 0.660012012 | -5.533329013 |
| 1431772_a_at | 0.03520657   | 7.304173572 | 0.454151812  | 0.660020221 | 0.660020221 | -5.533334083 |
| 1421904_at   | 0.02949814   | 9.717841341 | 0.4541446    | 0.660025227 | 0.660025227 | -5.533337174 |
| 1445959_at   | 0.037991596  | 3.847405053 | 0.454143388  | 0.660026068 | 0.660026068 | -5.533337694 |
| 1437608_x_at | 0.039461782  | 10.3475644  | 0.454132037  | 0.660033947 | 0.660033947 | -5.533342559 |
| 1441222_x_at | -0.036547627 | 3.615919835 | -0.454111333 | 0.660048317 | 0.660048317 | -5.533351433 |
| 1428928_at   | -0.03751757  | 5.931583324 | -0.454108794 | 0.660050079 | 0.660050079 | -5.533352522 |
| 1448958_at   | 0.033482564  | 8.323384507 | 0.454103314  | 0.660053883 | 0.660053883 | -5.533354871 |
| 1425164_a_at | 0.040309432  | 3.526483434 | 0.454090716  | 0.660062626 | 0.660062626 | -5.53336027  |
| 1446307_at   | 0.033365352  | 4.726534754 | 0.454086492  | 0.660065558 | 0.660065558 | -5.53336208  |
| 1450122_at   | 0.038507944  | 8.29882302  | 0.454041596  | 0.66009672  | 0.66009672  | -5.533381322 |
| 1426681_at   | 0.047014911  | 8.021686478 | 0.454028106  | 0.660106084 | 0.660106084 | -5.533387103 |
| 1456790_at   | -0.035813645 | 5.736944371 | -0.45402529  | 0.660108039 | 0.660108039 | -5.53338831  |
| 1429532_at   | -0.030245819 | 8.950777186 | -0.453947317 | 0.660162162 | 0.660162162 | -5.533421722 |
| 1447524_at   | 0.036760653  | 4.928234067 | 0.45393361   | 0.660171676 | 0.660171676 | -5.533427595 |
| 1445954_at   | -0.033506594 | 4.243341763 | -0.453919453 | 0.660181503 | 0.660181503 | -5.53343366  |
| 1460009_at   | 0.04593842   | 5.763273442 | 0.453879512  | 0.660209229 | 0.660209229 | -5.533450772 |
| 1444405_at   | -0.038096888 | 3.236917963 | -0.453839686 | 0.660236874 | 0.660236874 | -5.533467833 |
| 1447951_at   | -0.033304771 | 7.887539792 | -0.453791043 | 0.660270642 | 0.660270642 | -5.53348867  |
| 1455929_x_at | 0.029261498  | 11.55790252 | 0.453760065  | 0.660292146 | 0.660292146 | -5.533501938 |
| 1430616_at   | -0.047079384 | 4.104741081 | -0.453728914 | 0.660313771 | 0.660313771 | -5.53351528  |
| 1441437_at   | -0.033140273 | 7.622523347 | -0.453651412 | 0.660367575 | 0.660367575 | -5.533548469 |
| 1460413_s_at | -0.029161945 | 6.181097622 | -0.453626408 | 0.660384934 | 0.660384934 | -5.533559176 |
| 1436323_at   | -0.03974687  | 8.294009795 | -0.453603573 | 0.660400788 | 0.660400788 | -5.533568953 |
| 1424961_at   | -0.03161771  | 3.897688396 | -0.453539308 | 0.660445404 | 0.660445404 | -5.533596467 |
| 1447615_at   | 0.037625214  | 3.517651807 | 0.453478168  | 0.660487853 | 0.660487853 | -5.53362264  |
| 1419471_a_at | -0.028767338 | 9.239571317 | -0.453472591 | 0.660491725 | 0.660491725 | -5.533625027 |
| 1417751_at   | 0.037054083  | 7.348556322 | 0.453439336  | 0.660514815 | 0.660514815 | -5.533639261 |
| 1430060_at   | -0.045113347 | 4.13315431  | -0.453437955 | 0.660515773 | 0.660515773 | -5.533639852 |
| 1434113_a_at | -0.041213337 | 8.807569179 | -0.453415163 | 0.660531598 | 0.660531598 | -5.533649607 |
| 1443251_at   | -0.057244852 | 4.16369497  | -0.453412484 | 0.660533458 | 0.660533458 | -5.533650754 |
| 1455400_at   | 0.038111819  | 7.650676599 | 0.453410406  | 0.660534901 | 0.660534901 | -5.533651643 |
| 1445201_at   | -0.083489339 | 5.559126308 | -0.453374884 | 0.660559565 | 0.660559565 | -5.533666846 |
| 1439581_at   | 0.051978948  | 4.328924663 | 0.453363187  | 0.660567687 | 0.660567687 | -5.533671851 |
| 1447971_at   | 0.033871405  | 4.648437241 | 0.453336998  | 0.66058587  | 0.66058587  | -5.533683058 |
| 1437803_at   | -0.048975291 | 3.454357582 | -0.453311372 | 0.660603664 | 0.660603664 | -5.533694024 |
| 1459722_at   | -0.051024264 | 8.143680753 | -0.453303417 | 0.660609188 | 0.660609188 | -5.533697428 |
| 1429335_at   | 0.048224267  | 7.473750427 | 0.453287195  | 0.660620451 | 0.660620451 | -5.533704369 |
| 1427763_a_at | 0.040640709  | 6.158867562 | 0.453213157  | 0.660671862 | 0.660671862 | -5.533736046 |
| 1433821_at   | -0.02798922  | 8.308749095 | -0.453212931 | 0.660672019 | 0.660672019 | -5.533736143 |
| 1436740_at   | -0.053050671 | 10.8604622  | -0.453110176 | 0.660743373 | 0.660743373 | -5.533780098 |
| 1439127_at   | -0.064337374 | 8.695243816 | -0.453020135 | 0.6608059   | 0.6608059   | -5.533818606 |
| 1440620_at   | -0.054937287 | 5.4341477   | -0.452941405 | 0.660860575 | 0.660860575 | -5.533852271 |
| 1426984_at   | -0.038169003 | 6.973884049 | -0.45285595  | 0.660919923 | 0.660919923 | -5.533888806 |
| 1450358_at   | -0.034567109 | 4.028323421 | -0.452855852 | 0.660919991 | 0.660919991 | -5.533888848 |

|              |              |             |              |             |             |              |
|--------------|--------------|-------------|--------------|-------------|-------------|--------------|
| 1423970_at   | 0.028308615  | 9.51626289  | 0.45284004   | 0.660930974 | 0.660930974 | -5.533895607 |
| 1433373_at   | -0.028974963 | 3.088857301 | -0.452825509 | 0.660941066 | 0.660941066 | -5.533901819 |
| 1454736_at   | 0.047048514  | 7.909980611 | 0.45281538   | 0.6609481   | 0.6609481   | -5.533906149 |
| 1421887_a_at | 0.037026265  | 10.44821993 | 0.452746006  | 0.660996283 | 0.660996283 | -5.533935801 |
| 1453617_at   | -0.04718857  | 4.329605429 | -0.452734377 | 0.66100436  | 0.66100436  | -5.533940771 |
| 1415780_a_at | 0.040358124  | 10.91523665 | 0.452723944  | 0.661011606 | 0.661011606 | -5.533945229 |
| 1443099_at   | 0.087664804  | 4.986976337 | 0.452707432  | 0.661023075 | 0.661023075 | -5.533952286 |
| 1432136_s_at | -0.033292063 | 8.61491922  | -0.452687031 | 0.661037245 | 0.661037245 | -5.533961005 |
| 1428782_a_at | -0.031168915 | 10.88952997 | -0.452624846 | 0.661080437 | 0.661080437 | -5.533987577 |
| 1440183_x_at | -0.068652656 | 6.119530667 | -0.452619562 | 0.661084107 | 0.661084107 | -5.533989834 |
| 1418727_at   | -0.034247073 | 7.86521633  | -0.452519183 | 0.661153831 | 0.661153831 | -5.53403272  |
| 1434706_at   | -0.054486015 | 7.788534645 | -0.452501008 | 0.661166456 | 0.661166456 | -5.534040484 |
| 1415886_at   | 0.036050072  | 7.288426613 | 0.452451388  | 0.661200923 | 0.661200923 | -5.534061679 |
| 1446704_at   | -0.060603451 | 4.598921626 | -0.452444079 | 0.661206001 | 0.661206001 | -5.534064801 |
| 1449961_at   | -0.037840022 | 3.953091431 | -0.452422595 | 0.661220925 | 0.661220925 | -5.534073977 |
| 1450214_at   | 0.030432341  | 6.058890017 | 0.452396821  | 0.661238829 | 0.661238829 | -5.534084985 |
| 1426475_at   | 0.044323446  | 9.092692242 | 0.45239613   | 0.661239309 | 0.661239309 | -5.53408528  |
| 1436325_at   | 0.036894859  | 5.167641847 | 0.452310688  | 0.661298664 | 0.661298664 | -5.534121767 |
| 1446556_at   | 0.058414536  | 4.878738249 | 0.452187338  | 0.661384357 | 0.661384357 | -5.534174431 |
| 1432152_at   | -0.030771037 | 4.43308785  | -0.452176831 | 0.661391657 | 0.661391657 | -5.534178916 |
| 1437594_x_at | 0.035061568  | 4.978482942 | 0.452168958  | 0.661397127 | 0.661397127 | -5.534182277 |
| 1441627_at   | -0.053957643 | 6.686991732 | -0.452132349 | 0.661422561 | 0.661422561 | -5.534197903 |
| 1420971_at   | -0.046577897 | 8.005779436 | -0.452100599 | 0.661444619 | 0.661444619 | -5.534211455 |
| 1429966_at   | 0.052098511  | 5.492817365 | 0.452093958  | 0.661449233 | 0.661449233 | -5.534214289 |
| 1457580_at   | 0.037997995  | 5.061662321 | 0.452047626  | 0.661481424 | 0.661481424 | -5.534234063 |
| 1443312_at   | -0.036384283 | 3.48975454  | -0.45200776  | 0.661509122 | 0.661509122 | -5.534251076 |
| 1419586_at   | -0.051701593 | 5.165506709 | -0.451855201 | 0.661615124 | 0.661615124 | -5.534316167 |
| 1438000_x_at | 0.045631599  | 11.18123238 | 0.451852436  | 0.661617045 | 0.661617045 | -5.534317346 |
| 1423845_at   | -0.034127751 | 5.179993552 | -0.451848693 | 0.661619646 | 0.661619646 | -5.534318943 |
| 1444106_at   | 0.066834421  | 4.884536182 | 0.451838169  | 0.661626959 | 0.661626959 | -5.534323432 |
| 1457787_at   | 0.048645487  | 3.833873723 | 0.451817605  | 0.661641248 | 0.661641248 | -5.534332204 |
| 1438226_at   | -0.038920431 | 7.486975829 | -0.451811989 | 0.66164515  | 0.66164515  | -5.53433346  |
| 1458897_at   | -0.042068506 | 7.009978211 | -0.451800508 | 0.661653128 | 0.661653128 | -5.534339497 |
| 1449529_s_at | 0.035782449  | 3.1632315   | 0.451781595  | 0.66166627  | 0.66166627  | -5.534347564 |
| 1446538_at   | 0.039041892  | 7.227274884 | 0.45173331   | 0.661699823 | 0.661699823 | -5.534368158 |
| 1426453_at   | 0.031780181  | 9.770940782 | 0.451619707  | 0.661778766 | 0.661778766 | -5.534416601 |
| 1428087_at   | 0.029760947  | 9.996626235 | 0.451584202  | 0.66180344  | 0.66180344  | -5.53443174  |
| 1448111_at   | -0.035709249 | 8.932397795 | -0.451496984 | 0.661864053 | 0.661864053 | -5.534468921 |
| 1436432_at   | -0.041360919 | 3.371564861 | -0.45149428  | 0.661865932 | 0.661865932 | -5.534470074 |
| 1441661_at   | -0.03085261  | 3.541904496 | -0.451464186 | 0.661886846 | 0.661886846 | -5.534482902 |
| 1416099_at   | 0.030243817  | 12.70557013 | 0.451403292  | 0.661929168 | 0.661929168 | -5.534508855 |
| 1433021_at   | 0.037052518  | 6.282773014 | 0.451402147  | 0.661929963 | 0.661929963 | -5.534509343 |
| 1459292_at   | 0.047641371  | 5.904561622 | 0.45133047   | 0.66197978  | 0.66197978  | -5.534539889 |
| 1459444_at   | -0.067256817 | 5.417366563 | -0.451259289 | 0.662029254 | 0.662029254 | -5.534570218 |
| 1454893_at   | 0.039965619  | 8.968186893 | 0.451254529  | 0.662032562 | 0.662032562 | -5.534572246 |
| 1443544_at   | 0.033739092  | 6.577891475 | 0.451241136  | 0.662041871 | 0.662041871 | -5.534577952 |
| 1445768_at   | -0.032098063 | 3.332602506 | -0.451223234 | 0.662054314 | 0.662054314 | -5.534585579 |
| 1450307_x_at | -0.031814886 | 8.33954913  | -0.451211927 | 0.662062173 | 0.662062173 | -5.534590396 |
| 1430044_at   | -0.046394329 | 4.062467575 | -0.451197758 | 0.662072021 | 0.662072021 | -5.534596432 |
| 1436703_x_at | 0.042348416  | 10.4752766  | 0.45118627   | 0.662080007 | 0.662080007 | -5.534601326 |
| 1456088_at   | 0.034738705  | 8.179249925 | 0.451166965  | 0.662093425 | 0.662093425 | -5.534609549 |
| 1429792_at   | 0.047041305  | 6.247245074 | 0.451133497  | 0.662116688 | 0.662116688 | -5.534623805 |
| 1424412_at   | 0.048766547  | 7.842133216 | 0.451016978  | 0.662197682 | 0.662197682 | -5.534673429 |

|              |              |             |              |             |             |              |
|--------------|--------------|-------------|--------------|-------------|-------------|--------------|
| 1445824_at   | 0.074166661  | 5.542819474 | 0.450990431  | 0.662216136 | 0.662216136 | -5.534684734 |
| 1426292_at   | -0.033791629 | 7.506941404 | -0.450880636 | 0.662292461 | 0.662292461 | -5.534731481 |
| 1438023_at   | -0.027209477 | 3.833259157 | -0.450872185 | 0.662298337 | 0.662298337 | -5.534735079 |
| 1430432_at   | 0.044676973  | 3.622244006 | 0.450865023  | 0.662303315 | 0.662303315 | -5.534738127 |
| 1425622_at   | 0.052702978  | 5.802545662 | 0.450863192  | 0.662304589 | 0.662304589 | -5.534738907 |
| 1418344_at   | 0.042467264  | 5.465658265 | 0.450849563  | 0.662314063 | 0.662314063 | -5.534744709 |
| 1428273_at   | 0.033876041  | 7.443456312 | 0.450841955  | 0.662319352 | 0.662319352 | -5.534747947 |
| 1439048_at   | -0.07528193  | 5.099161748 | -0.450826071 | 0.662330395 | 0.662330395 | -5.534754709 |
| 1458310_at   | 0.037425475  | 3.503526208 | 0.450824325  | 0.662331609 | 0.662331609 | -5.534755452 |
| 1448173_a_at | -0.038637436 | 7.203859011 | -0.450818968 | 0.662335333 | 0.662335333 | -5.534757732 |
| 1433690_at   | 0.034905671  | 8.068992675 | 0.450813397  | 0.662339206 | 0.662339206 | -5.534760104 |
| 1459433_at   | -0.027824918 | 6.289537676 | -0.450802055 | 0.66234709  | 0.66234709  | -5.534764931 |
| 1429132_at   | -0.048349772 | 4.254130755 | -0.450783008 | 0.662360333 | 0.662360333 | -5.534773038 |
| 1449164_at   | -0.061363857 | 6.874383883 | -0.450775376 | 0.662365638 | 0.662365638 | -5.534776286 |
| 1436622_at   | -0.037718026 | 5.211547484 | -0.450762254 | 0.662374761 | 0.662374761 | -5.534781871 |
| 1431771_a_at | 0.05595469   | 8.525867079 | 0.450754666  | 0.662380036 | 0.662380036 | -5.534785101 |
| 1457726_at   | -0.040139886 | 6.840747255 | -0.450725787 | 0.662400114 | 0.662400114 | -5.534797391 |
| 1444846_at   | 0.041354512  | 3.403384347 | 0.450722406  | 0.662402465 | 0.662402465 | -5.534798831 |
| 1415683_at   | 0.034568568  | 10.28699581 | 0.450673578  | 0.662436412 | 0.662436412 | -5.534819609 |
| 1421085_at   | 0.028687217  | 5.00265897  | 0.45067124   | 0.662438038 | 0.662438038 | -5.534820604 |
| 1428198_at   | 0.045561271  | 7.70880232  | 0.4505507    | 0.662521845 | 0.662521845 | -5.53487189  |
| 1427354_at   | -0.034726881 | 3.33124477  | -0.450545139 | 0.662525712 | 0.662525712 | -5.534874257 |
| 1441590_at   | 0.038523409  | 4.222407297 | 0.450484922  | 0.662567581 | 0.662567581 | -5.534899872 |
| 1446038_at   | -0.046969613 | 3.928794677 | -0.45045024  | 0.662591696 | 0.662591696 | -5.534914624 |
| 1415926_at   | 0.06340326   | 9.708832332 | 0.450439626  | 0.662599076 | 0.662599076 | -5.534919138 |
| 1439910_a_at | 0.037605661  | 5.875678017 | 0.450388494  | 0.662634631 | 0.662634631 | -5.534940884 |
| 1433118_at   | -0.031965341 | 6.113302645 | -0.450322609 | 0.662680445 | 0.662680445 | -5.534968901 |
| 1439173_at   | 0.05628343   | 5.091090639 | 0.450310238  | 0.662689047 | 0.662689047 | -5.534974162 |
| 1455069_x_at | 0.028672442  | 11.97316986 | 0.450306928  | 0.662691349 | 0.662691349 | -5.534975569 |
| 1433458_at   | 0.03781617   | 3.626110767 | 0.450288584  | 0.662704104 | 0.662704104 | -5.534983369 |
| 1437471_at   | -0.032712462 | 9.061998832 | -0.450267762 | 0.662718584 | 0.662718584 | -5.534992222 |
| 1430466_at   | -0.047840717 | 3.422536213 | -0.450253719 | 0.662728349 | 0.662728349 | -5.534998192 |
| 1431643_at   | 0.034559238  | 3.12676066  | 0.450242867  | 0.662735896 | 0.662735896 | -5.535002806 |
| 1451597_at   | 0.028780139  | 3.093234096 | 0.4502292    | 0.662745399 | 0.662745399 | -5.535008616 |
| 1439546_at   | -0.027260312 | 6.218255337 | -0.450224641 | 0.66274857  | 0.66274857  | -5.535010554 |
| 1428238_at   | -0.047054477 | 4.539484699 | -0.450215615 | 0.662754847 | 0.662754847 | -5.535014391 |
| 1435851_at   | -0.041815758 | 4.291852668 | -0.450153328 | 0.662798162 | 0.662798162 | -5.535040869 |
| 1436712_at   | -0.028567954 | 4.343903972 | -0.450138523 | 0.662808458 | 0.662808458 | -5.535047162 |
| 1432359_at   | 0.032795029  | 5.56141296  | 0.450123718  | 0.662818754 | 0.662818754 | -5.535053455 |
| 1441888_x_at | 0.044834178  | 6.659819692 | 0.450113003  | 0.662826206 | 0.662826206 | -5.535058009 |
| 1452905_at   | 0.036154613  | 12.7118741  | 0.450104319  | 0.662832245 | 0.662832245 | -5.5350617   |
| 1429899_at   | -0.038450508 | 5.361518501 | -0.450064698 | 0.662859799 | 0.662859799 | -5.535078539 |
| 1440002_at   | 0.047139822  | 7.090103918 | 0.450039197  | 0.662877534 | 0.662877534 | -5.535089376 |
| 1448497_at   | 0.033671961  | 8.578203457 | 0.450024527  | 0.662887737 | 0.662887737 | -5.53509561  |
| 1443259_at   | -0.0348149   | 3.87449683  | -0.450011865 | 0.662896543 | 0.662896543 | -5.535100991 |
| 1435078_at   | 0.034346982  | 7.872449304 | 0.449967151  | 0.662927641 | 0.662927641 | -5.53511999  |
| 1445214_at   | -0.066041256 | 4.28193972  | -0.4499111   | 0.662966624 | 0.662966624 | -5.535143804 |
| 1453663_at   | -0.031585586 | 3.600589986 | -0.449864214 | 0.662999234 | 0.662999234 | -5.535163722 |
| 1426460_a_at | 0.03966758   | 7.930676521 | 0.449840507  | 0.663015723 | 0.663015723 | -5.535173793 |
| 1422014_at   | -0.083151759 | 6.672244546 | -0.449799238 | 0.663044427 | 0.663044427 | -5.535191322 |
| 1432993_at   | 0.034371463  | 4.068154279 | 0.449785626  | 0.663053895 | 0.663053895 | -5.535197104 |
| 1431950_at   | 0.041862517  | 4.163643197 | 0.449699902  | 0.663113522 | 0.663113522 | -5.53523351  |
| 1451351_at   | -0.027980524 | 8.903329334 | -0.449654188 | 0.66314532  | 0.66314532  | -5.535252922 |



|              |              |             |              |             |             |              |
|--------------|--------------|-------------|--------------|-------------|-------------|--------------|
| 1420520_x_at | 0.027451013  | 7.843253684 | 0.449532664  | 0.663229854 | 0.663229854 | -5.535304516 |
| 1441784_at   | -0.029097846 | 3.327140837 | -0.4494688   | 0.663274281 | 0.663274281 | -5.535331624 |
| 1460054_at   | 0.034769411  | 4.144356642 | 0.449456818  | 0.663282617 | 0.663282617 | -5.53533671  |
| 1421714_at   | -0.053372659 | 4.342650874 | -0.449415892 | 0.663311088 | 0.663311088 | -5.53535408  |
| 1438659_x_at | 0.057092542  | 8.376865094 | 0.449412982  | 0.663313112 | 0.663313112 | -5.535355315 |
| 1439791_at   | 0.033084361  | 6.070665768 | 0.449407286  | 0.663317075 | 0.663317075 | -5.535357732 |
| 1423149_at   | 0.050796657  | 10.3623257  | 0.449389275  | 0.663329605 | 0.663329605 | -5.535365376 |
| 1447362_at   | -0.047205583 | 5.007277483 | -0.44936698  | 0.663345116 | 0.663345116 | -5.535374837 |
| 1449018_at   | -0.042463565 | 10.80338861 | -0.44930619  | 0.663387407 | 0.663387407 | -5.535400632 |
| 1443134_at   | 0.032319416  | 3.950586638 | 0.449258067  | 0.663420888 | 0.663420888 | -5.535421049 |
| 1440909_at   | -0.030931595 | 5.490293721 | -0.449248294 | 0.663427687 | 0.663427687 | -5.535425195 |
| 1430696_at   | 0.053072649  | 5.740676684 | 0.449211775  | 0.663453095 | 0.663453095 | -5.535440688 |
| 1416351_at   | -0.0279219   | 8.972012949 | -0.449189721 | 0.663468439 | 0.663468439 | -5.535450043 |
| 1425152_s_at | -0.028524472 | 3.655256336 | -0.449165811 | 0.663485074 | 0.663485074 | -5.535460185 |
| 1417667_a_at | -0.034614589 | 7.99182686  | -0.449163665 | 0.663486567 | 0.663486567 | -5.535461096 |
| 1435440_at   | 0.052443666  | 9.038592512 | 0.449151273  | 0.663495189 | 0.663495189 | -5.535466352 |
| 1459234_at   | -0.045167411 | 4.877926437 | -0.449075611 | 0.663547834 | 0.663547834 | -5.535498442 |
| 1424892_at   | 0.036319665  | 7.185793207 | 0.449057784  | 0.663560237 | 0.663560237 | -5.535506002 |
| 1423216_a_at | 0.048634095  | 8.758995385 | 0.449010148  | 0.663593383 | 0.663593383 | -5.535526203 |
| 1432258_at   | -0.037534982 | 3.964206379 | -0.448996131 | 0.663603136 | 0.663603136 | -5.535532146 |
| 1449689_at   | -0.029906244 | 4.065776871 | -0.448967456 | 0.663623089 | 0.663623089 | -5.535544305 |
| 1445034_at   | 0.034412758  | 3.884728736 | 0.448948457  | 0.663636309 | 0.663636309 | -5.53555236  |
| 1443704_at   | 0.046944369  | 4.08828643  | 0.448838228  | 0.663713012 | 0.663713012 | -5.535599089 |
| 1451695_a_at | -0.02911593  | 10.71309298 | -0.448787515 | 0.663748302 | 0.663748302 | -5.535620584 |
| 1447900_x_at | -0.059816338 | 5.434722837 | -0.448768708 | 0.663761391 | 0.663761391 | -5.535628555 |
| 1456932_at   | -0.035974844 | 5.640404471 | -0.448762835 | 0.663765477 | 0.663765477 | -5.535631044 |
| 1418788_at   | -0.036790366 | 8.023641712 | -0.44875236  | 0.663772767 | 0.663772767 | -5.535635483 |
| 1438901_at   | 0.034873476  | 5.385122828 | 0.44873426   | 0.663785363 | 0.663785363 | -5.535643154 |
| 1435018_at   | 0.038735557  | 9.371099623 | 0.448707185  | 0.663804204 | 0.663804204 | -5.535654627 |
| 1416372_at   | -0.030785386 | 9.369794743 | -0.448666387 | 0.663832597 | 0.663832597 | -5.535671915 |
| 1420340_at   | 0.039835353  | 4.897019624 | 0.448646062  | 0.663846742 | 0.663846742 | -5.535680528 |
| 1442338_at   | -0.037897676 | 3.596455965 | -0.448618255 | 0.663866094 | 0.663866094 | -5.535692309 |
| 1452240_at   | -0.042729629 | 6.691233364 | -0.448593438 | 0.663883365 | 0.663883365 | -5.535702823 |
| 1452005_at   | 0.104633196  | 6.474493483 | 0.448585608  | 0.663888815 | 0.663888815 | -5.53570614  |
| 1451213_at   | -0.032765656 | 6.529891941 | -0.448542394 | 0.66391889  | 0.66391889  | -5.535724447 |
| 1430415_at   | 0.033227777  | 8.069785923 | 0.448541659  | 0.663919402 | 0.663919402 | -5.535724759 |
| 1448904_at   | -0.036441259 | 8.765677437 | -0.448538377 | 0.663921686 | 0.663921686 | -5.535726149 |
| 1438321_x_at | 0.041793292  | 8.414687711 | 0.448479446  | 0.663962701 | 0.663962701 | -5.535751111 |
| 1424417_at   | -0.036724094 | 6.291146543 | -0.448473466 | 0.663966863 | 0.663966863 | -5.535753644 |
| 1454460_at   | -0.055407751 | 7.019034875 | -0.448437936 | 0.663991592 | 0.663991592 | -5.535768692 |
| 1438498_at   | 0.041946317  | 4.137174049 | 0.448384962  | 0.664028462 | 0.664028462 | -5.535791126 |
| 1443426_at   | -0.048420703 | 6.327918951 | -0.448353149 | 0.664050606 | 0.664050606 | -5.535804598 |
| 1442137_at   | -0.036906531 | 6.161564841 | -0.448302338 | 0.664085973 | 0.664085973 | -5.535826112 |
| 1455071_at   | 0.03057746   | 6.984329243 | 0.44820099   | 0.664156518 | 0.664156518 | -5.535869018 |
| 1423690_s_at | -0.033735561 | 8.489378829 | -0.448150996 | 0.664191318 | 0.664191318 | -5.535890179 |
| 1437567_at   | 0.027952042  | 4.322044094 | 0.448108635  | 0.664220806 | 0.664220806 | -5.535908108 |
| 1425980_at   | -0.035039396 | 6.276071145 | -0.448103983 | 0.664224045 | 0.664224045 | -5.535910077 |
| 1435418_at   | -0.042026693 | 4.028131826 | -0.448100452 | 0.664226503 | 0.664226503 | -5.535911571 |
| 1451487_at   | 0.028710585  | 7.820551994 | 0.44806718   | 0.664249664 | 0.664249664 | -5.535925652 |
| 1442841_at   | -0.046443874 | 4.969464474 | -0.448055211 | 0.664257997 | 0.664257997 | -5.535930717 |
| 1439238_at   | -0.040206197 | 5.333815912 | -0.447977625 | 0.664312008 | 0.664312008 | -5.535963547 |
| 1457009_at   | 0.028798243  | 8.828765618 | 0.447957421  | 0.664326074 | 0.664326074 | -5.535972095 |
| 1432067_at   | -0.031055017 | 4.283651313 | -0.447950926 | 0.664330595 | 0.664330595 | -5.535974843 |

|              |              |             |              |             |             |              |
|--------------|--------------|-------------|--------------|-------------|-------------|--------------|
| 1439587_at   | -0.041049902 | 6.841462418 | -0.4479118   | 0.664357834 | 0.664357834 | -5.535991395 |
| 1460052_at   | -0.040994321 | 3.6729286   | -0.447860162 | 0.664393784 | 0.664393784 | -5.53601324  |
| 1458622_at   | -0.064209704 | 3.562082513 | -0.447838924 | 0.66440857  | 0.66440857  | -5.536022223 |
| 1457629_at   | 0.036416689  | 3.494352363 | 0.447799368  | 0.66443611  | 0.66443611  | -5.536038954 |
| 1447767_at   | 0.05357826   | 4.031326122 | 0.447744623  | 0.664474225 | 0.664474225 | -5.536062106 |
| 1459879_at   | -0.034749127 | 7.187713719 | -0.447737569 | 0.664479136 | 0.664479136 | -5.536065089 |
| 1457624_at   | -0.033506225 | 3.326994633 | -0.447715155 | 0.664494742 | 0.664494742 | -5.536074568 |
| 1436434_at   | 0.040195116  | 6.829810284 | 0.447674125  | 0.66452331  | 0.66452331  | -5.536091917 |
| 1457079_at   | -0.053069099 | 6.639710233 | -0.447643358 | 0.664544732 | 0.664544732 | -5.536104926 |
| 1447847_x_at | -0.030824864 | 3.31584709  | -0.447625524 | 0.664557149 | 0.664557149 | -5.536112466 |
| 1430998_at   | 0.032457071  | 3.888842489 | 0.447584771  | 0.664585525 | 0.664585525 | -5.536129695 |
| 1460358_s_at | -0.029744749 | 6.938263271 | -0.447565479 | 0.664598958 | 0.664598958 | -5.536137851 |
| 1451595_a_at | 0.078614085  | 4.00165233  | 0.447555964  | 0.664605583 | 0.664605583 | -5.536141873 |
| 1429379_at   | -0.117732982 | 7.349212438 | -0.447550104 | 0.664609664 | 0.664609664 | -5.53614435  |
| 1443960_at   | -0.057222499 | 4.823347828 | -0.447548789 | 0.66461058  | 0.66461058  | -5.536144906 |
| 1446471_at   | 0.04336626   | 4.368007754 | 0.447525531  | 0.664626774 | 0.664626774 | -5.536154737 |
| 1426042_at   | -0.037523352 | 3.438906099 | -0.447461984 | 0.664671024 | 0.664671024 | -5.536181597 |
| 1432400_at   | 0.036622393  | 3.667625731 | 0.447455674  | 0.664675418 | 0.664675418 | -5.536184264 |
| 1435039_a_at | 0.048753089  | 7.918144191 | 0.447442597  | 0.664684524 | 0.664684524 | -5.53618979  |
| 1442741_at   | -0.034655387 | 4.621176536 | -0.447441121 | 0.664685552 | 0.664685552 | -5.536190414 |
| 1430622_at   | -0.042124346 | 5.899433481 | -0.447439385 | 0.664686761 | 0.664686761 | -5.536191148 |
| 1459226_at   | 0.07379616   | 4.625357258 | 0.447429463  | 0.66469367  | 0.66469367  | -5.536195341 |
| 1434566_a_at | 0.064238671  | 6.657972409 | 0.447413462  | 0.664704812 | 0.664704812 | -5.536202103 |
| 1455818_at   | 0.051181565  | 8.02989454  | 0.447386289  | 0.664723734 | 0.664723734 | -5.536213586 |
| 1420838_at   | -0.045732998 | 8.898230839 | -0.447329473 | 0.664763299 | 0.664763299 | -5.536237593 |
| 1435780_at   | -0.033420536 | 6.003472435 | -0.447303449 | 0.664781422 | 0.664781422 | -5.536248589 |
| 1426140_x_at | 0.039934922  | 3.27584003  | 0.447247456  | 0.664820416 | 0.664820416 | -5.536272244 |
| 1456032_x_at | 0.065559189  | 10.06710738 | 0.447243538  | 0.664823144 | 0.664823144 | -5.536273899 |
| 1434419_s_at | 0.031458068  | 9.207063255 | 0.447178184  | 0.664868658 | 0.664868658 | -5.536301506 |
| 1452047_at   | 0.036867538  | 10.46958232 | 0.447166664  | 0.664876681 | 0.664876681 | -5.536306371 |
| 1440230_at   | 0.035295755  | 5.622832711 | 0.447157535  | 0.664883039 | 0.664883039 | -5.536310227 |
| 1419390_at   | -0.046703506 | 4.042213843 | -0.447137287 | 0.66489714  | 0.66489714  | -5.536318779 |
| 1453974_at   | -0.031595693 | 5.291304145 | -0.447058825 | 0.664951786 | 0.664951786 | -5.536351914 |
| 1453554_a_at | 0.039725963  | 8.444589056 | 0.447054956  | 0.664954481 | 0.664954481 | -5.536353548 |
| 1440747_at   | 0.04670663   | 4.942183506 | 0.447045891  | 0.664960794 | 0.664960794 | -5.536357376 |
| 1418676_at   | -0.054827814 | 5.801440778 | -0.447041006 | 0.664964197 | 0.664964197 | -5.536359439 |
| 1426623_a_at | 0.043354336  | 7.719506971 | 0.446986458  | 0.665002189 | 0.665002189 | -5.536382471 |
| 1438230_at   | 0.029516867  | 8.742909184 | 0.446911168  | 0.665054629 | 0.665054629 | -5.536414257 |
| 1423409_a_at | 0.02841353   | 10.25910151 | 0.446905945  | 0.665058267 | 0.665058267 | -5.536416462 |
| 1425652_s_at | 0.069939082  | 5.579195692 | 0.446851998  | 0.665095843 | 0.665095843 | -5.536439234 |
| 1433355_at   | 0.028645669  | 3.357216075 | 0.44684144   | 0.665103197 | 0.665103197 | -5.53644369  |
| 1423489_at   | -0.032707532 | 9.381113138 | -0.446813441 | 0.6651227   | 0.6651227   | -5.536455507 |
| 1434904_at   | 0.043768564  | 7.325684716 | 0.446798759  | 0.665132927 | 0.665132927 | -5.536461704 |
| 1447827_x_at | 0.042837691  | 7.696117953 | 0.446768922  | 0.665153711 | 0.665153711 | -5.536474296 |
| 1436385_at   | 0.037797419  | 5.867315071 | 0.446753904  | 0.665164172 | 0.665164172 | -5.536480634 |
| 1437431_at   | 0.0291673    | 7.090529997 | 0.446680868  | 0.665215048 | 0.665215048 | -5.536511453 |
| 1419234_at   | 0.036920448  | 7.348397069 | 0.446677282  | 0.665217545 | 0.665217545 | -5.536512966 |
| 1451444_s_at | -0.034122922 | 6.646310304 | -0.446645993 | 0.665239342 | 0.665239342 | -5.536526167 |
| 1432328_at   | -0.049754796 | 4.047912353 | -0.446611168 | 0.665263601 | 0.665263601 | -5.536540859 |
| 1423807_a_at | -0.033519927 | 12.8716207  | -0.446603056 | 0.665269253 | 0.665269253 | -5.536544282 |
| 1454207_at   | 0.052829115  | 3.644214246 | 0.446590791  | 0.665277797 | 0.665277797 | -5.536549456 |
| 1432709_at   | -0.050855149 | 3.809926552 | -0.446581476 | 0.665284286 | 0.665284286 | -5.536553385 |
| 1435447_at   | -0.029830715 | 3.32784958  | -0.446488961 | 0.665348737 | 0.665348737 | -5.536592409 |

|              |              |             |              |             |             |              |
|--------------|--------------|-------------|--------------|-------------|-------------|--------------|
| 1453226_at   | -0.032746133 | 7.772614186 | -0.446470142 | 0.665361847 | 0.665361847 | -5.536600346 |
| 1433674_a_at | -0.041861529 | 10.42119501 | -0.446444793 | 0.665379507 | 0.665379507 | -5.536611036 |
| 1440684_at   | -0.031417591 | 4.311900186 | -0.446440611 | 0.665382421 | 0.665382421 | -5.5366128   |
| 1459485_at   | 0.060035073  | 6.12483325  | 0.446416278  | 0.665399373 | 0.665399373 | -5.536623061 |
| 1431668_at   | -0.035728651 | 3.881583413 | -0.446353293 | 0.665443255 | 0.665443255 | -5.53664962  |
| 1448259_at   | -0.060732433 | 12.51359807 | -0.446323213 | 0.665464212 | 0.665464212 | -5.536662303 |
| 1433229_at   | 0.06990099   | 4.136362734 | 0.446297698  | 0.665481989 | 0.665481989 | -5.53667306  |
| 1429653_at   | -0.048017386 | 6.135387065 | -0.446297273 | 0.665482286 | 0.665482286 | -5.536673239 |
| 1459580_at   | 0.033813484  | 3.231804818 | 0.446281489  | 0.665493282 | 0.665493282 | -5.536679893 |
| 1419104_at   | 0.036177221  | 6.345659952 | 0.446216084  | 0.665538853 | 0.665538853 | -5.536707465 |
| 1438930_s_at | 0.072783697  | 7.071085726 | 0.446198551  | 0.66555107  | 0.66555107  | -5.536714855 |
| 1459107_at   | -0.039590639 | 6.587217437 | -0.446146485 | 0.665587348 | 0.665587348 | -5.5367368   |
| 1456340_at   | 0.094693474  | 6.089320467 | 0.446110444  | 0.665612461 | 0.665612461 | -5.536751989 |
| 1417249_at   | 0.0432615    | 6.446162701 | 0.446042966  | 0.66565948  | 0.66565948  | -5.536780424 |
| 1417645_at   | 0.047059031  | 5.847382139 | 0.446038757  | 0.665662413 | 0.665662413 | -5.536782197 |
| 1456098_a_at | 0.039721538  | 8.268099379 | 0.446034414  | 0.665665439 | 0.665665439 | -5.536784027 |
| 1452714_at   | 0.033387706  | 8.664208638 | 0.445932197  | 0.665736668 | 0.665736668 | -5.536827092 |
| 1444025_at   | -0.045217379 | 3.589603784 | -0.445900433 | 0.665758803 | 0.665758803 | -5.536840473 |
| 1456993_at   | 0.045177871  | 7.156747539 | 0.445895389  | 0.665762318 | 0.665762318 | -5.536842597 |
| 1457935_at   | 0.038547187  | 5.555422658 | 0.445885106  | 0.665769483 | 0.665769483 | -5.536846929 |
| 1440160_x_at | 0.034017942  | 8.170932642 | 0.44586727   | 0.665781913 | 0.665781913 | -5.536854442 |
| 1451791_at   | -0.035175104 | 8.48895758  | -0.445853162 | 0.665791744 | 0.665791744 | -5.536860384 |
| 1441189_at   | 0.040330654  | 3.323276118 | 0.445770412  | 0.665849413 | 0.665849413 | -5.536895234 |
| 1441362_at   | -0.105449311 | 6.325850361 | -0.445750869 | 0.665863032 | 0.665863032 | -5.536903464 |
| 1459355_at   | -0.047449495 | 5.109985232 | -0.445746931 | 0.665865777 | 0.665865777 | -5.536905122 |
| 1423256_a_at | 0.04220163   | 10.98692328 | 0.445740997  | 0.665869912 | 0.665869912 | -5.536907621 |
| 1430686_at   | 0.038570758  | 5.121385687 | 0.445727172  | 0.665879547 | 0.665879547 | -5.536913443 |
| 1458646_at   | 0.057883669  | 5.647583596 | 0.445718799  | 0.665885383 | 0.665885383 | -5.536916968 |
| 1457654_at   | -0.039494181 | 3.812075203 | -0.445687375 | 0.665907283 | 0.665907283 | -5.536930199 |
| 1444941_at   | 0.037711502  | 3.607607342 | 0.445605449  | 0.665964381 | 0.665964381 | -5.536964691 |
| 1459708_at   | -0.035503855 | 3.565310555 | -0.445601517 | 0.665967121 | 0.665967121 | -5.536966346 |
| 1446672_at   | -0.03339291  | 3.408088698 | -0.445589249 | 0.665975672 | 0.665975672 | -5.53697151  |
| 1435747_at   | 0.044770376  | 3.585233025 | 0.445572472  | 0.665987365 | 0.665987365 | -5.536978572 |
| 1438269_at   | -0.055196759 | 3.993330545 | -0.445547159 | 0.666005008 | 0.666005008 | -5.536989227 |
| 1446298_at   | 0.038206605  | 6.851832257 | 0.445527652  | 0.666018604 | 0.666018604 | -5.536997438 |
| 1419796_at   | 0.038642291  | 3.729912134 | 0.445499213  | 0.666038426 | 0.666038426 | -5.537009408 |
| 1430494_at   | -0.03987056  | 5.071937367 | -0.445497227 | 0.66603981  | 0.66603981  | -5.537010243 |
| 1450891_at   | 0.042309198  | 10.65750219 | 0.445467722  | 0.666060375 | 0.666060375 | -5.537022661 |
| 1452228_at   | -0.033863133 | 7.606644362 | -0.445418312 | 0.666094815 | 0.666094815 | -5.537043454 |
| 1452166_a_at | 0.087815562  | 8.105567497 | 0.445409417  | 0.666101015 | 0.666101015 | -5.537047197 |
| 1442445_at   | 0.041244686  | 6.46401594  | 0.445396452  | 0.666110052 | 0.666110052 | -5.537052652 |
| 1417938_at   | 0.027772144  | 8.461435363 | 0.445329477  | 0.666156737 | 0.666156737 | -5.537080832 |
| 1422264_s_at | -0.063686208 | 4.031770615 | -0.445327391 | 0.666158191 | 0.666158191 | -5.53708171  |
| 1448809_at   | 0.029594668  | 10.30394063 | 0.445273795  | 0.666195551 | 0.666195551 | -5.537104257 |
| 1439303_at   | 0.030881213  | 3.470703315 | 0.445273067  | 0.666196058 | 0.666196058 | -5.537104563 |
| 1429367_at   | 0.031850411  | 8.895593493 | 0.44524403   | 0.666216299 | 0.666216299 | -5.537116778 |
| 1444467_at   | 0.053444719  | 4.500760684 | 0.445193803  | 0.666251312 | 0.666251312 | -5.537137904 |
| 1417174_at   | 0.034005023  | 7.897652501 | 0.445179478  | 0.666261298 | 0.666261298 | -5.537143929 |
| 1420011_s_at | 0.043254294  | 9.545305566 | 0.4451512    | 0.666281011 | 0.666281011 | -5.537155822 |
| 1448713_at   | -0.045703438 | 4.145426109 | -0.445143596 | 0.666286312 | 0.666286312 | -5.53715902  |
| 1457903_at   | 0.049615149  | 3.577789907 | 0.445114649  | 0.666306492 | 0.666306492 | -5.537171193 |
| 1435171_at   | 0.038006282  | 7.523815743 | 0.445106414  | 0.666312232 | 0.666312232 | -5.537174656 |
| 1426107_at   | -0.03651953  | 4.720218285 | -0.445088741 | 0.666324553 | 0.666324553 | -5.537182088 |

|              |              |             |              |             |             |              |
|--------------|--------------|-------------|--------------|-------------|-------------|--------------|
| 1419145_at   | -0.037650608 | 3.90285294  | -0.445087979 | 0.666325084 | 0.666325084 | -5.537182408 |
| 1449972_s_at | -0.05962439  | 7.425116463 | -0.445050033 | 0.666351538 | 0.666351538 | -5.537198364 |
| 1428317_at   | -0.050324693 | 4.779140609 | -0.445034251 | 0.66636254  | 0.66636254  | -5.537205    |
| 1424530_at   | -0.029924172 | 5.66039819  | -0.445023269 | 0.666370197 | 0.666370197 | -5.537209617 |
| 1425344_at   | 0.039604011  | 7.496100712 | 0.445014849  | 0.666376067 | 0.666376067 | -5.537213158 |
| 1425089_at   | 0.02740347   | 5.653145834 | 0.444994634  | 0.66639016  | 0.66639016  | -5.537221656 |
| 1460266_at   | 0.040039892  | 3.652339654 | 0.444990751  | 0.666392867 | 0.666392867 | -5.537223289 |
| 1418835_at   | 0.059553829  | 8.827883948 | 0.444989019  | 0.666394075 | 0.666394075 | -5.537224017 |
| 1444952_a_at | 0.057006361  | 9.905340977 | 0.444799424  | 0.666526261 | 0.666526261 | -5.537303709 |
| 1441356_at   | -0.034388996 | 5.845954702 | -0.444779639 | 0.666540055 | 0.666540055 | -5.537312023 |
| 1444504_at   | 0.054754846  | 4.96925069  | 0.444736393  | 0.666570209 | 0.666570209 | -5.537330195 |
| 1423830_a_at | 0.036279749  | 6.733046682 | 0.444687443  | 0.66660434  | 0.66660434  | -5.537350763 |
| 1455997_a_at | -0.029319459 | 13.12896351 | -0.44463222  | 0.666642846 | 0.666642846 | -5.537373962 |
| 1448659_at   | -0.063391942 | 8.165472463 | -0.444626241 | 0.666647015 | 0.666647015 | -5.537376474 |
| 1437795_at   | 0.041204188  | 6.346062989 | 0.444622291  | 0.666649769 | 0.666649769 | -5.537378133 |
| 1417531_at   | 0.045296826  | 3.434487132 | 0.444588085  | 0.666673622 | 0.666673622 | -5.537392503 |
| 1421390_at   | 0.029000067  | 3.347095834 | 0.44455396   | 0.666697417 | 0.666697417 | -5.537406836 |
| 1434751_at   | -0.035959748 | 6.56871813  | -0.444520132 | 0.666721006 | 0.666721006 | -5.537421044 |
| 1416387_at   | 0.031820756  | 8.322412877 | 0.44450874   | 0.66672895  | 0.66672895  | -5.537425829 |
| 1428504_at   | -0.027311934 | 4.703723215 | -0.44448351  | 0.666746544 | 0.666746544 | -5.537436424 |
| 1439744_at   | 0.044723231  | 6.53411444  | 0.444462351  | 0.666761299 | 0.666761299 | -5.53744531  |
| 1454761_at   | -0.059297841 | 7.45774578  | -0.444455137 | 0.66676633  | 0.66676633  | -5.537448339 |
| 1434935_at   | -0.046805711 | 10.81604805 | -0.444420928 | 0.666790185 | 0.666790185 | -5.537462704 |
| 1421816_at   | -0.042822148 | 7.48387728  | -0.444405155 | 0.666801185 | 0.666801185 | -5.537469327 |
| 1455895_x_at | -0.052036985 | 6.287747641 | -0.444397022 | 0.666806857 | 0.666806857 | -5.537472742 |
| 1452908_at   | 0.033160544  | 8.96449837  | 0.444358944  | 0.666833412 | 0.666833412 | -5.53748873  |
| 1431534_at   | -0.042049384 | 3.916573071 | -0.444326196 | 0.666856249 | 0.666856249 | -5.537502478 |
| 1454758_a_at | 0.029182675  | 12.20811873 | 0.444269952  | 0.666895474 | 0.666895474 | -5.537526089 |
| 1437365_at   | -0.035389943 | 5.425610647 | -0.444257433 | 0.666904205 | 0.666904205 | -5.537531344 |
| 1425120_x_at | 0.035521419  | 5.797474086 | 0.444232008  | 0.666921937 | 0.666921937 | -5.537542016 |
| 1421668_x_at | -0.044920704 | 4.581874514 | -0.444230762 | 0.666922806 | 0.666922806 | -5.537542539 |
| 1446594_at   | 0.026562047  | 3.458728629 | 0.444175171  | 0.666961577 | 0.666961577 | -5.537565871 |
| 1440219_at   | -0.052237682 | 8.106724989 | -0.44416307  | 0.666970017 | 0.666970017 | -5.537570949 |
| 1438177_x_at | 0.056641719  | 8.676768307 | 0.444160965  | 0.666971485 | 0.666971485 | -5.537571833 |
| 1430858_at   | 0.043290659  | 4.470510324 | 0.444148297  | 0.666980321 | 0.666980321 | -5.537577149 |
| 1449124_at   | -0.030883373 | 6.383372899 | -0.443995042 | 0.667087213 | 0.667087213 | -5.537641453 |
| 1449459_s_at | -0.057356698 | 6.023626587 | -0.443920754 | 0.66713903  | 0.66713903  | -5.537672615 |
| 1442575_at   | 0.049932561  | 4.476314819 | 0.443912748  | 0.667144615 | 0.667144615 | -5.537675973 |
| 1445844_at   | -0.033156307 | 5.126355915 | -0.443911541 | 0.667145456 | 0.667145456 | -5.53767648  |
| 1434626_at   | -0.032994688 | 6.936030586 | -0.443885017 | 0.667163958 | 0.667163958 | -5.537687604 |
| 1445090_at   | 0.038706663  | 3.815777614 | 0.443870808  | 0.667173869 | 0.667173869 | -5.537693564 |
| 1443583_at   | 0.036750382  | 6.894183876 | 0.443778958  | 0.66723794  | 0.66723794  | -5.537732082 |
| 1446515_at   | -0.046720982 | 4.806344123 | -0.443765238 | 0.667247511 | 0.667247511 | -5.537737836 |
| 1438153_x_at | 0.043164229  | 3.358876676 | 0.443762365  | 0.667249515 | 0.667249515 | -5.53773904  |
| 1432220_at   | -0.02861775  | 3.554093837 | -0.443756378 | 0.667253692 | 0.667253692 | -5.537741551 |
| 1417908_s_at | 0.037700693  | 9.557953604 | 0.44375245   | 0.667256432 | 0.667256432 | -5.537743198 |
| 1424393_s_at | -0.037050549 | 3.459213335 | -0.443722526 | 0.667277307 | 0.667277307 | -5.537755744 |
| 1449006_at   | 0.047473775  | 4.539269546 | 0.443698907  | 0.667293783 | 0.667293783 | -5.537765647 |
| 1434214_at   | 0.037503872  | 8.628097661 | 0.443664685  | 0.667317657 | 0.667317657 | -5.537779994 |
| 1421849_at   | 0.028481309  | 10.39258053 | 0.443661001  | 0.667320227 | 0.667320227 | -5.537781539 |
| 1434397_at   | 0.02759697   | 8.696302881 | 0.44355726   | 0.6673926   | 0.6673926   | -5.537825024 |
| 1437976_x_at | 0.02966977   | 13.83452692 | 0.443487654  | 0.667441162 | 0.667441162 | -5.537854195 |
| 1417995_at   | 0.039455065  | 3.788998855 | 0.443464948  | 0.667457003 | 0.667457003 | -5.53786371  |

|              |              |             |              |             |             |              |
|--------------|--------------|-------------|--------------|-------------|-------------|--------------|
| 1455612_at   | 0.069600974  | 5.379878416 | 0.44343216   | 0.667479879 | 0.667479879 | -5.537877449 |
| 1417573_at   | 0.028558543  | 10.22931362 | 0.443364071  | 0.667527385 | 0.667527385 | -5.537905976 |
| 1421584_at   | -0.036555518 | 6.201744539 | -0.44335583  | 0.667533135 | 0.667533135 | -5.537909429 |
| 1423641_s_at | 0.042656014  | 10.29703585 | 0.443313594  | 0.667562604 | 0.667562604 | -5.537927123 |
| 1419491_at   | -0.071493905 | 4.07510418  | -0.443255781 | 0.667602943 | 0.667602943 | -5.537951339 |
| 1421907_at   | -0.046533983 | 9.190708489 | -0.44322125  | 0.667627037 | 0.667627037 | -5.537965802 |
| 1448542_at   | -0.031133067 | 10.63813784 | -0.443210808 | 0.667634323 | 0.667634323 | -5.537970175 |
| 1431142_s_at | 0.039974432  | 5.407172421 | 0.443179185  | 0.667656388 | 0.667656388 | -5.537983419 |
| 1427727_x_at | 0.029956494  | 4.053024949 | 0.443169613  | 0.667663068 | 0.667663068 | -5.537987428 |
| 1443534_at   | 0.043384001  | 6.512206004 | 0.443138961  | 0.667684456 | 0.667684456 | -5.538000263 |
| 1433467_at   | 0.028055651  | 8.85848591  | 0.443133951  | 0.667687952 | 0.667687952 | -5.538002361 |
| 1453658_at   | 0.034795721  | 3.731035631 | 0.443105664  | 0.667707691 | 0.667707691 | -5.538014206 |
| 1441178_at   | -0.044091871 | 5.14176162  | -0.443091646 | 0.667717473 | 0.667717473 | -5.538020075 |
| 1434594_at   | -0.03489338  | 7.960236025 | -0.443079337 | 0.667726062 | 0.667726062 | -5.538025229 |
| 1416062_at   | -0.048238625 | 7.723562416 | -0.443050798 | 0.667745977 | 0.667745977 | -5.538037178 |
| 1424901_at   | 0.045833842  | 3.254546969 | 0.442947042  | 0.667818383 | 0.667818383 | -5.538080612 |
| 1449019_at   | 0.030349362  | 8.134099958 | 0.442946784  | 0.667818562 | 0.667818562 | -5.53808072  |
| 1455421_x_at | 0.033682524  | 3.483276636 | 0.44294432   | 0.667820282 | 0.667820282 | -5.538081751 |
| 1424918_at   | -0.033629093 | 8.675722996 | -0.442910319 | 0.66784401  | 0.66784401  | -5.538095983 |
| 1426795_at   | -0.092360756 | 5.107224253 | -0.442797556 | 0.667922705 | 0.667922705 | -5.538143172 |
| 1451287_s_at | 0.042060065  | 6.019181436 | 0.442760458  | 0.667948597 | 0.667948597 | -5.538158695 |
| 1425539_a_at | 0.027787852  | 9.723539512 | 0.442748281  | 0.667957095 | 0.667957095 | -5.53816379  |
| 1430306_a_at | 0.043806608  | 4.889494655 | 0.442742589  | 0.667961068 | 0.667961068 | -5.538166172 |
| 1457515_at   | 0.036792682  | 6.209067238 | 0.442679817  | 0.668004879 | 0.668004879 | -5.538192433 |
| 1448099_at   | -0.030170641 | 4.202742505 | -0.442676604 | 0.668007122 | 0.668007122 | -5.538193777 |
| 1435809_at   | 0.03075618   | 5.782559817 | 0.442654442  | 0.668022589 | 0.668022589 | -5.538203048 |
| 1439067_at   | -0.050054543 | 3.414844665 | -0.442571563 | 0.668080436 | 0.668080436 | -5.538237714 |
| 1447611_at   | 0.039791012  | 3.786307126 | 0.442556693  | 0.668090816 | 0.668090816 | -5.538243933 |
| 1453395_at   | 0.033686944  | 6.392278475 | 0.44253689   | 0.668104637 | 0.668104637 | -5.538252214 |
| 1428200_a_at | -0.035275576 | 6.879265804 | -0.442518193 | 0.668117688 | 0.668117688 | -5.538260034 |
| 1438940_x_at | 0.035942191  | 12.59155092 | 0.442491114  | 0.668136589 | 0.668136589 | -5.538271357 |
| 1434151_at   | 0.047848231  | 8.180027702 | 0.442474173  | 0.668148414 | 0.668148414 | -5.538278441 |
| 1427199_at   | 0.033067412  | 7.009663128 | 0.442458661  | 0.668159242 | 0.668159242 | -5.538284928 |
| 1416348_at   | -0.055856469 | 7.810349085 | -0.44245487  | 0.668161889 | 0.668161889 | -5.538286513 |
| 1449281_at   | 0.053764245  | 7.742242996 | 0.442407146  | 0.668195201 | 0.668195201 | -5.538306466 |
| 1460273_a_at | 0.033198655  | 3.945021947 | 0.442388299  | 0.668208357 | 0.668208357 | -5.538314346 |
| 1438955_x_at | 0.043403464  | 5.73587076  | 0.442378675  | 0.668215075 | 0.668215075 | -5.538318369 |
| 1422668_at   | -0.042376133 | 5.176019258 | -0.442369535 | 0.668221455 | 0.668221455 | -5.53832219  |
| 1450868_at   | -0.037526719 | 8.865266104 | -0.442345845 | 0.668237992 | 0.668237992 | -5.538332094 |
| 1424314_at   | -0.035642582 | 8.606739745 | -0.44234313  | 0.668239887 | 0.668239887 | -5.538333229 |
| 1423647_a_at | -0.041902433 | 7.961917583 | -0.442334858 | 0.668245661 | 0.668245661 | -5.538336687 |
| 1426838_at   | 0.032942173  | 8.474500158 | 0.442253653  | 0.668302349 | 0.668302349 | -5.538370629 |
| 1435843_x_at | 0.044395715  | 7.00929846  | 0.442244676  | 0.668308616 | 0.668308616 | -5.538374381 |
| 1416849_at   | 0.032921189  | 8.721644184 | 0.442226285  | 0.668321454 | 0.668321454 | -5.538382067 |
| 1455144_s_at | 0.039240038  | 7.103455887 | 0.442161046  | 0.668366998 | 0.668366998 | -5.53840933  |
| 1451329_at   | -0.037079963 | 7.268260659 | -0.442128101 | 0.668389998 | 0.668389998 | -5.538423096 |
| 1439819_at   | 0.081023335  | 5.640400069 | 0.442125727  | 0.668391655 | 0.668391655 | -5.538424088 |
| 1417899_at   | 0.028247349  | 3.764293828 | 0.442056924  | 0.668439689 | 0.668439689 | -5.538452834 |
| 1439143_at   | 0.041762803  | 4.01705895  | 0.442043293  | 0.668449206 | 0.668449206 | -5.538458529 |
| 1432737_at   | -0.04181502  | 4.177918643 | -0.442041462 | 0.668450485 | 0.668450485 | -5.538459294 |
| 1427909_at   | -0.036036459 | 10.43671112 | -0.442023793 | 0.66846282  | 0.66846282  | -5.538466675 |
| 1424481_s_at | 0.042740794  | 4.128287154 | 0.441977598  | 0.668495072 | 0.668495072 | -5.538485971 |
| 1436121_a_at | -0.030236322 | 9.031131324 | -0.441966419 | 0.668502877 | 0.668502877 | -5.538490641 |

|              |              |             |              |             |             |              |
|--------------|--------------|-------------|--------------|-------------|-------------|--------------|
| 1456875_at   | 0.034617802  | 5.983808794 | 0.441965917  | 0.668503228 | 0.668503228 | -5.538490851 |
| 1428612_at   | -0.033066089 | 7.154952077 | -0.44196019  | 0.668507226 | 0.668507226 | -5.538493242 |
| 1421242_at   | 0.058529585  | 6.93830292  | 0.441951071  | 0.668513593 | 0.668513593 | -5.538497051 |
| 1447484_x_at | -0.041618821 | 7.47184255  | -0.441896558 | 0.668551654 | 0.668551654 | -5.538519818 |
| 1425761_a_at | -0.04117683  | 7.415610933 | -0.441866167 | 0.668572874 | 0.668572874 | -5.53853251  |
| 1425005_at   | -0.03055268  | 3.184628794 | -0.441850198 | 0.668584023 | 0.668584023 | -5.538539179 |
| 1434127_a_at | 0.042230808  | 13.03733173 | 0.441836147  | 0.668593834 | 0.668593834 | -5.538545046 |
| 1440669_at   | -0.040008842 | 4.403863936 | -0.441762867 | 0.668645001 | 0.668645001 | -5.538575643 |
| 1416472_at   | 0.030402356  | 9.613531833 | 0.441750955  | 0.668653319 | 0.668653319 | -5.538580617 |
| 1438243_at   | -0.036531242 | 4.460986483 | -0.44173466  | 0.668664697 | 0.668664697 | -5.538587419 |
| 1452999_at   | 0.031894705  | 9.046618182 | 0.441720075  | 0.668674881 | 0.668674881 | -5.538593509 |
| 1434009_at   | -0.040908957 | 8.638699896 | -0.44165848  | 0.668717891 | 0.668717891 | -5.538619221 |
| 1436526_at   | -0.028736373 | 5.775525895 | -0.44165105  | 0.66872308  | 0.66872308  | -5.538622322 |
| 1433744_at   | -0.037079193 | 3.765922949 | -0.441647761 | 0.668725377 | 0.668725377 | -5.538623695 |
| 1447878_s_at | 0.027658438  | 8.642126414 | 0.441642909  | 0.668728764 | 0.668728764 | -5.53862572  |
| 1441555_at   | 0.075915836  | 4.409391299 | 0.441626346  | 0.668740331 | 0.668740331 | -5.538632633 |
| 1425709_at   | -0.039995472 | 4.029676256 | -0.44160854  | 0.668752764 | 0.668752764 | -5.538640065 |
| 1418131_at   | 0.037711302  | 8.011060409 | 0.441608353  | 0.668752895 | 0.668752895 | -5.538640143 |
| 1455611_at   | 0.032741195  | 7.02450789  | 0.441552827  | 0.66879167  | 0.66879167  | -5.538663316 |
| 1434347_s_at | -0.067116651 | 3.948216266 | -0.441515116 | 0.668818004 | 0.668818004 | -5.538679053 |
| 1436191_at   | -0.044622059 | 6.978060407 | -0.441509364 | 0.668822021 | 0.668822021 | -5.538681453 |
| 1429844_at   | -0.038415832 | 7.28794907  | -0.441477272 | 0.668844432 | 0.668844432 | -5.538694844 |
| 1437287_at   | -0.038129811 | 8.810482114 | -0.441434969 | 0.668873975 | 0.668873975 | -5.538712494 |
| 1448024_at   | 0.063853238  | 6.598187441 | 0.441421572  | 0.668883331 | 0.668883331 | -5.538718083 |
| 1436710_at   | -0.034982985 | 6.34173577  | -0.441403696 | 0.668895815 | 0.668895815 | -5.538725541 |
| 1430271_x_at | 0.053461699  | 8.504943261 | 0.441348713  | 0.668934214 | 0.668934214 | -5.538748477 |
| 1437729_at   | -0.061358622 | 7.993005261 | -0.441329986 | 0.668947293 | 0.668947293 | -5.538756289 |
| 1423210_a_at | -0.030637873 | 11.34105832 | -0.44131617  | 0.668956942 | 0.668956942 | -5.538762052 |
| 1448418_s_at | -0.034924168 | 9.074149886 | -0.441290055 | 0.668975181 | 0.668975181 | -5.538772944 |
| 1416268_at   | 0.028779728  | 10.5444781  | 0.441214022  | 0.669028284 | 0.669028284 | -5.538804653 |
| 1443694_at   | -0.04642034  | 4.27278247  | -0.441211003 | 0.669030393 | 0.669030393 | -5.538805912 |
| 1447291_at   | 0.043177963  | 4.648721828 | 0.441193471  | 0.669042637 | 0.669042637 | -5.538813223 |
| 1449597_at   | 0.03019607   | 3.263130533 | 0.441154588  | 0.669069795 | 0.669069795 | -5.538829436 |
| 1442850_at   | -0.04412948  | 4.042523708 | -0.441146093 | 0.669075729 | 0.669075729 | -5.538832978 |
| 1427319_at   | 0.036637228  | 8.678942978 | 0.44110767   | 0.669102566 | 0.669102566 | -5.538848998 |
| 1422702_at   | 0.029133952  | 9.614962319 | 0.441037262  | 0.669151745 | 0.669151745 | -5.53887835  |
| 1438301_at   | -0.090122498 | 7.13307175  | -0.440916489 | 0.669236107 | 0.669236107 | -5.538928688 |
| 1439939_at   | -0.036138485 | 5.814780076 | -0.44089171  | 0.669253416 | 0.669253416 | -5.538939014 |
| 1453399_at   | 0.034542354  | 9.922417115 | 0.440866176  | 0.669271253 | 0.669271253 | -5.538949654 |
| 1447112_s_at | -0.031421138 | 7.709247425 | -0.440862966 | 0.669273495 | 0.669273495 | -5.538950992 |
| 1455530_at   | -0.038837974 | 3.491243853 | -0.440861638 | 0.669274423 | 0.669274423 | -5.538951545 |
| 1441939_x_at | 0.037830651  | 3.126791075 | 0.440850212  | 0.669282404 | 0.669282404 | -5.538956306 |
| 1457800_at   | -0.034221168 | 5.672591101 | -0.440849497 | 0.669282903 | 0.669282903 | -5.538956604 |
| 1420195_at   | -0.034007583 | 4.295953529 | -0.440822948 | 0.66930145  | 0.66930145  | -5.538967666 |
| 1448292_at   | -0.03922131  | 10.40026286 | -0.440815837 | 0.669306417 | 0.669306417 | -5.538970629 |
| 1422576_at   | 0.036479791  | 11.47352922 | 0.44067649   | 0.669403764 | 0.669403764 | -5.539028679 |
| 1442744_at   | 0.04559003   | 8.986562256 | 0.440611067  | 0.66944947  | 0.66944947  | -5.539055928 |
| 1426822_at   | -0.04099137  | 7.293639461 | -0.440598566 | 0.669458204 | 0.669458204 | -5.539061134 |
| 1453767_a_at | 0.031799016  | 8.633420906 | 0.440590405  | 0.669463906 | 0.669463906 | -5.539064533 |
| 1417746_at   | 0.059074272  | 6.123728965 | 0.44057345   | 0.669475751 | 0.669475751 | -5.539071593 |
| 1426680_at   | -0.062494129 | 8.739936273 | -0.440544306 | 0.669496113 | 0.669496113 | -5.539083729 |
| 1458858_at   | -0.03993718  | 3.996454455 | -0.44051965  | 0.669513339 | 0.669513339 | -5.539093996 |
| 1429790_at   | 0.052706923  | 3.9134001   | 0.440519402  | 0.669513512 | 0.669513512 | -5.539094099 |

|              |              |             |              |             |             |              |
|--------------|--------------|-------------|--------------|-------------|-------------|--------------|
| 1457465_at   | -0.031693846 | 8.414304662 | -0.440500911 | 0.669526432 | 0.669526432 | -5.539101799 |
| 1448150_at   | 0.074680317  | 4.748375186 | 0.440489251  | 0.669534578 | 0.669534578 | -5.539106653 |
| 1425573_a_at | 0.044583928  | 7.040455012 | 0.440396629  | 0.669599292 | 0.669599292 | -5.539145213 |
| 1416458_at   | 0.034805623  | 8.366817929 | 0.440362095  | 0.669623422 | 0.669623422 | -5.539159588 |
| 1442078_at   | -0.036335082 | 6.329224096 | -0.440314999 | 0.669656329 | 0.669656329 | -5.539179191 |
| 1418401_a_at | 0.029888232  | 8.74809414  | 0.440302175  | 0.66966529  | 0.66966529  | -5.539184528 |
| 1458740_at   | -0.046730025 | 3.75636367  | -0.440176208 | 0.66975331  | 0.66975331  | -5.539236946 |
| 1433452_at   | -0.051532354 | 6.20214465  | -0.440144216 | 0.669775666 | 0.669775666 | -5.539250257 |
| 1430492_at   | 0.036603831  | 5.324024967 | 0.440096554  | 0.669808973 | 0.669808973 | -5.539270086 |
| 1416663_at   | -0.02762864  | 10.39455775 | -0.44007717  | 0.669822518 | 0.669822518 | -5.539278149 |
| 1426281_at   | -0.032859199 | 3.803580178 | -0.440072482 | 0.669825794 | 0.669825794 | -5.539280099 |
| 1449406_at   | -0.05006516  | 7.271855463 | -0.43999826  | 0.669877663 | 0.669877663 | -5.539310972 |
| 1423869_s_at | 0.035422831  | 6.874859863 | 0.439948005  | 0.669912784 | 0.669912784 | -5.539331872 |
| 1455168_a_at | -0.034210043 | 13.41410956 | -0.439816119 | 0.670004956 | 0.670004956 | -5.539386712 |
| 1440992_at   | -0.058803214 | 6.303461935 | -0.439805338 | 0.670012491 | 0.670012491 | -5.539391194 |
| 1459900_at   | 0.053137097  | 5.531256317 | 0.439801125  | 0.670015436 | 0.670015436 | -5.539392946 |
| 1450309_at   | -0.034948285 | 3.73756522  | -0.439786298 | 0.670025798 | 0.670025798 | -5.539399109 |
| 1416260_a_at | -0.028071144 | 8.538358605 | -0.439708613 | 0.670080094 | 0.670080094 | -5.539431402 |
| 1448460_at   | 0.032938187  | 9.622793106 | 0.4396707    | 0.670106593 | 0.670106593 | -5.53944716  |
| 1448243_at   | -0.030887862 | 9.672492027 | -0.439641766 | 0.670126817 | 0.670126817 | -5.539459185 |
| 1453362_x_at | 0.026955235  | 12.94212404 | 0.439626787  | 0.670137287 | 0.670137287 | -5.53946541  |
| 1416734_at   | 0.039313233  | 4.25846066  | 0.43960172   | 0.670154808 | 0.670154808 | -5.539475827 |
| 1456205_x_at | 0.032448179  | 11.15593303 | 0.439555123  | 0.670187378 | 0.670187378 | -5.53949519  |
| 1421823_a_at | 0.02911015   | 9.80202263  | 0.439545165  | 0.670194339 | 0.670194339 | -5.539499327 |
| 1450763_x_at | 0.038020273  | 3.080907255 | 0.43953251   | 0.670203185 | 0.670203185 | -5.539504586 |
| 1455884_at   | -0.045147161 | 8.274702477 | -0.439524642 | 0.670208685 | 0.670208685 | -5.539507855 |
| 1449802_x_at | -0.0333937   | 3.499722625 | -0.439516884 | 0.670214107 | 0.670214107 | -5.539511078 |
| 1441894_s_at | -0.043852777 | 9.881923013 | -0.439444397 | 0.670264776 | 0.670264776 | -5.539541192 |
| 1431629_at   | -0.04072044  | 4.730198475 | -0.439443033 | 0.67026573  | 0.67026573  | -5.539541759 |
| 1452519_a_at | -0.0391912   | 6.872731299 | -0.43942387  | 0.670279125 | 0.670279125 | -5.539549719 |
| 1453431_at   | -0.034422162 | 4.742265231 | -0.439408505 | 0.670289866 | 0.670289866 | -5.539556102 |
| 1450973_s_at | -0.036237912 | 7.922287668 | -0.439399334 | 0.670296277 | 0.670296277 | -5.539559911 |
| 1438112_at   | -0.030151903 | 3.601528513 | -0.439375623 | 0.670312852 | 0.670312852 | -5.53956976  |
| 1432037_at   | -0.052027411 | 5.298371848 | -0.439359877 | 0.670323859 | 0.670323859 | -5.5395763   |
| 1443899_at   | -0.037435373 | 6.768586831 | -0.439343392 | 0.670335383 | 0.670335383 | -5.539583147 |
| 1429651_at   | 0.033788541  | 4.775467872 | 0.439323385  | 0.670349369 | 0.670349369 | -5.539591456 |
| 1441317_x_at | 0.049086417  | 4.730110475 | 0.439322831  | 0.670349757 | 0.670349757 | -5.539591686 |
| 1445846_at   | 0.03764793   | 4.355702242 | 0.43929925   | 0.670366242 | 0.670366242 | -5.539601479 |
| 1458253_at   | 0.032566087  | 3.592380113 | 0.439242377  | 0.670406001 | 0.670406001 | -5.539625096 |
| 1459644_at   | 0.039670039  | 5.155547389 | 0.439240671  | 0.670407194 | 0.670407194 | -5.539625805 |
| 1422701_at   | -0.037781222 | 4.372560417 | -0.439232322 | 0.67041303  | 0.67041303  | -5.539629271 |
| 1459523_at   | 0.034088837  | 3.428476223 | 0.439215707  | 0.670424646 | 0.670424646 | -5.53963617  |
| 1419405_at   | -0.038416446 | 5.893785296 | -0.43920755  | 0.670430348 | 0.670430348 | -5.539639557 |
| 1450520_at   | -0.030039186 | 4.345103873 | -0.439202821 | 0.670433654 | 0.670433654 | -5.53964152  |
| 1459948_at   | -0.039644911 | 6.620676141 | -0.439186191 | 0.670445281 | 0.670445281 | -5.539648425 |
| 1453720_at   | 0.036215362  | 4.998051615 | 0.439113946  | 0.670495789 | 0.670495789 | -5.539678417 |
| 1455539_at   | 0.037219693  | 8.319329357 | 0.439106824  | 0.670500768 | 0.670500768 | -5.539681374 |
| 1450150_a_at | 0.027880843  | 13.46361813 | 0.439063614  | 0.670530978 | 0.670530978 | -5.53969931  |
| 1454696_at   | -0.063534383 | 11.08161132 | -0.439046856 | 0.670542694 | 0.670542694 | -5.539706265 |
| 1447225_at   | 0.035406097  | 3.785602213 | 0.439024046  | 0.670558642 | 0.670558642 | -5.539715732 |
| 1435457_at   | 0.035165349  | 7.4777406   | 0.438991593  | 0.670581333 | 0.670581333 | -5.539729201 |
| 1451663_a_at | -0.03248462  | 7.86503316  | -0.438983281 | 0.670587144 | 0.670587144 | -5.539732651 |
| 1440268_at   | 0.027389166  | 7.396725803 | 0.438971955  | 0.670595063 | 0.670595063 | -5.539737351 |

|              |              |             |              |             |             |              |
|--------------|--------------|-------------|--------------|-------------|-------------|--------------|
| 1427748_at   | -0.026998436 | 3.536199145 | -0.438881687 | 0.670658179 | 0.670658179 | -5.539774807 |
| 1421842_a_at | 0.0366915    | 7.510493292 | 0.438876805  | 0.670661592 | 0.670661592 | -5.539776833 |
| 1421675_at   | -0.028140767 | 3.866200015 | -0.438854093 | 0.670677473 | 0.670677473 | -5.539786256 |
| 1450391_a_at | 0.043487692  | 6.075901394 | 0.438828053  | 0.670695681 | 0.670695681 | -5.539797059 |
| 1415910_s_at | 0.040018728  | 9.229143909 | 0.438808129  | 0.670709612 | 0.670709612 | -5.539805324 |
| 1457626_at   | 0.033846776  | 7.070839579 | 0.438806261  | 0.670710918 | 0.670710918 | -5.539806099 |
| 1439521_at   | 0.042576025  | 4.920900744 | 0.438775898  | 0.67073215  | 0.67073215  | -5.539818695 |
| 1428030_at   | -0.039416749 | 3.489722568 | -0.438701747 | 0.670784    | 0.670784    | -5.539849451 |
| 1421459_a_at | -0.03346441  | 4.604673546 | -0.438689764 | 0.67079238  | 0.67079238  | -5.539854421 |
| 1452248_at   | -0.038895891 | 7.712982843 | -0.438620475 | 0.670840833 | 0.670840833 | -5.539883155 |
| 1420668_a_at | -0.030018043 | 7.226227495 | -0.438559925 | 0.670883176 | 0.670883176 | -5.539908261 |
| 1459966_at   | 0.036972723  | 5.409065665 | 0.43855195   | 0.670888753 | 0.670888753 | -5.539911568 |
| 1422926_at   | -0.061422353 | 4.27443766  | -0.438516729 | 0.670913384 | 0.670913384 | -5.539926171 |
| 1425075_at   | -0.063368344 | 9.578590994 | -0.438515982 | 0.670913907 | 0.670913907 | -5.53992648  |
| 1446870_at   | 0.04012199   | 3.59221689  | 0.438452323  | 0.670958426 | 0.670958426 | -5.53995287  |
| 1442134_at   | 0.042885066  | 6.531469087 | 0.438420904  | 0.6709804   | 0.6709804   | -5.539965893 |
| 1431594_at   | 0.033039912  | 4.138290347 | 0.438385322  | 0.671005285 | 0.671005285 | -5.539980641 |
| 1459628_at   | -0.04737824  | 4.468953802 | -0.438317137 | 0.671052973 | 0.671052973 | -5.540008899 |
| 1428724_at   | -0.036220485 | 7.091602324 | -0.438254765 | 0.671096597 | 0.671096597 | -5.540034744 |
| 1436825_a_at | -0.035886505 | 3.171273574 | -0.438210701 | 0.671127416 | 0.671127416 | -5.540053    |
| 1423707_at   | -0.029600004 | 8.735537476 | -0.438180682 | 0.671148412 | 0.671148412 | -5.540065436 |
| 1446618_at   | -0.043011453 | 7.57401518  | -0.438179707 | 0.671149095 | 0.671149095 | -5.540065841 |
| 1450483_at   | -0.039079067 | 4.516957849 | -0.438176129 | 0.671151597 | 0.671151597 | -5.540067323 |
| 1436118_at   | -0.03109774  | 8.080092534 | -0.438144792 | 0.671173516 | 0.671173516 | -5.540080304 |
| 1416042_s_at | 0.03238198   | 10.41034751 | 0.438132123  | 0.671182377 | 0.671182377 | -5.540085552 |
| 1433047_at   | 0.028539207  | 4.169118053 | 0.438067836  | 0.671227345 | 0.671227345 | -5.54011218  |
| 1431577_at   | -0.034481418 | 3.264749894 | -0.438046953 | 0.671241952 | 0.671241952 | -5.540120829 |
| 1421057_at   | 0.041278583  | 3.745639063 | 0.438034023  | 0.671250996 | 0.671250996 | -5.540126184 |
| 1455415_at   | 0.041118588  | 4.622952587 | 0.438031472  | 0.671252781 | 0.671252781 | -5.54012724  |
| 1439795_at   | 0.052710554  | 5.588856087 | 0.437978837  | 0.671289599 | 0.671289599 | -5.540149037 |
| 1427607_at   | -0.03356427  | 4.15918698  | -0.43796208  | 0.671301321 | 0.671301321 | -5.540155976 |
| 1451248_at   | -0.034097589 | 8.599368123 | -0.437941629 | 0.671315627 | 0.671315627 | -5.540164444 |
| 1422522_at   | -0.048067148 | 8.093584576 | -0.43787419  | 0.671362803 | 0.671362803 | -5.540192365 |
| 1430318_at   | -0.028468842 | 8.274705637 | -0.437862669 | 0.671370862 | 0.671370862 | -5.540197135 |
| 1453144_at   | 0.077843941  | 5.597951699 | 0.437859813  | 0.67137286  | 0.67137286  | -5.540198317 |
| 1444505_at   | 0.057425637  | 5.045383604 | 0.437854136  | 0.671376832 | 0.671376832 | -5.540200668 |
| 1427908_at   | 0.031167015  | 7.934398387 | 0.437847566  | 0.671381428 | 0.671381428 | -5.540203388 |
| 1421697_at   | -0.043549128 | 5.145353651 | -0.437828062 | 0.671395072 | 0.671395072 | -5.540211462 |
| 1440317_at   | -0.029194835 | 8.128865331 | -0.437816924 | 0.671402864 | 0.671402864 | -5.540216072 |
| 1460622_x_at | 0.049527199  | 5.721243564 | 0.437809249  | 0.671408233 | 0.671408233 | -5.540219249 |
| 1458394_at   | -0.045756255 | 6.370858067 | -0.437793583 | 0.671419192 | 0.671419192 | -5.540225734 |
| 1451974_at   | -0.026373522 | 9.290958852 | -0.437688627 | 0.671492619 | 0.671492619 | -5.540269172 |
| 1442835_at   | -0.050144229 | 4.122511138 | -0.437657805 | 0.671514183 | 0.671514183 | -5.540281927 |
| 1440550_at   | -0.029759455 | 3.26371949  | -0.437650056 | 0.671519604 | 0.671519604 | -5.540285133 |
| 1449248_at   | -0.043570588 | 7.115067653 | -0.437643648 | 0.671524087 | 0.671524087 | -5.540287785 |
| 1444842_at   | 0.02691677   | 5.787367133 | 0.437575389  | 0.671571843 | 0.671571843 | -5.540316028 |
| 1430121_at   | -0.049233174 | 3.19974019  | -0.437518848 | 0.671611403 | 0.671611403 | -5.540339419 |
| 1460621_x_at | 0.034090146  | 12.22832139 | 0.4374717    | 0.671644391 | 0.671644391 | -5.540358922 |
| 1425568_a_at | -0.049792331 | 8.858432463 | -0.437456725 | 0.671654869 | 0.671654869 | -5.540365116 |
| 1420959_at   | 0.0334865    | 9.479920281 | 0.437438117  | 0.671667889 | 0.671667889 | -5.540372813 |
| 1416226_at   | -0.040407754 | 9.772841419 | -0.437338626 | 0.671737504 | 0.671737504 | -5.540413958 |
| 1452297_at   | -0.038412069 | 7.238153782 | -0.437291691 | 0.671770345 | 0.671770345 | -5.540433365 |
| 1447445_at   | -0.033474561 | 4.167937187 | -0.437283764 | 0.671775893 | 0.671775893 | -5.540436643 |



|              |              |             |              |             |             |              |
|--------------|--------------|-------------|--------------|-------------|-------------|--------------|
| 1449970_at   | 0.037398671  | 6.226576701 | 0.437222787  | 0.671818561 | 0.671818561 | -5.540461852 |
| 1458319_at   | 0.034973297  | 3.593272236 | 0.437209361  | 0.671827956 | 0.671827956 | -5.540467403 |
| 1427083_a_at | 0.03521877   | 6.556761903 | 0.437117013  | 0.67189258  | 0.67189258  | -5.540505575 |
| 1417175_at   | 0.03948715   | 8.685383091 | 0.437071051  | 0.671924745 | 0.671924745 | -5.540524571 |
| 1432578_at   | 0.034319173  | 3.926629348 | 0.436995108  | 0.671977892 | 0.671977892 | -5.540555954 |
| 1417458_s_at | -0.040778988 | 11.20603526 | -0.436959676 | 0.672002688 | 0.672002688 | -5.540570594 |
| 1458355_x_at | -0.061478225 | 6.97329811  | -0.436954129 | 0.672006571 | 0.672006571 | -5.540572885 |
| 1419844_a_at | 0.029321457  | 3.645375543 | 0.436943457  | 0.67201404  | 0.67201404  | -5.540577295 |
| 1447074_at   | -0.034205198 | 3.646169055 | -0.436938807 | 0.672017294 | 0.672017294 | -5.540579216 |
| 1434219_at   | 0.030752302  | 8.319414598 | 0.436937384  | 0.67201829  | 0.67201829  | -5.540579804 |
| 1433918_at   | -0.028370774 | 6.730043491 | -0.436935913 | 0.67201932  | 0.67201932  | -5.540580412 |
| 1439448_x_at | -0.042473285 | 10.91598526 | -0.436926719 | 0.672025754 | 0.672025754 | -5.54058421  |
| 1432223_at   | 0.029263296  | 3.536252191 | 0.4369206    | 0.672030036 | 0.672030036 | -5.540586738 |
| 1432453_a_at | -0.050486224 | 4.213111988 | -0.436920226 | 0.672030298 | 0.672030298 | -5.540586893 |
| 1450238_at   | -0.033238281 | 3.495069392 | -0.436903914 | 0.672041714 | 0.672041714 | -5.540593632 |
| 1423126_at   | -0.031281462 | 10.77439079 | -0.436897571 | 0.672046154 | 0.672046154 | -5.540596252 |
| 1430127_a_at | 0.028889362  | 11.72732697 | 0.436842518  | 0.672084684 | 0.672084684 | -5.540618994 |
| 1416078_s_at | 0.027430678  | 9.874312082 | 0.436827464  | 0.67209522  | 0.67209522  | -5.540625212 |
| 1415889_a_at | -0.034443945 | 11.96341743 | -0.436825929 | 0.672096295 | 0.672096295 | -5.540625846 |
| 1435157_at   | -0.030474884 | 9.289524779 | -0.436813571 | 0.672104944 | 0.672104944 | -5.540630951 |
| 1439648_at   | 0.035241602  | 5.881289105 | 0.436808085  | 0.672108784 | 0.672108784 | -5.540633216 |
| 1446174_at   | 0.050548333  | 3.564667281 | 0.436767021  | 0.672137525 | 0.672137525 | -5.540650176 |
| 1440751_at   | 0.048777948  | 6.76388157  | 0.436715866  | 0.672173329 | 0.672173329 | -5.540671302 |
| 1444323_at   | -0.036642248 | 7.351501249 | -0.436695839 | 0.672187347 | 0.672187347 | -5.540679572 |
| 1439993_at   | -0.044538529 | 5.878926096 | -0.436654315 | 0.672216412 | 0.672216412 | -5.540696718 |
| 1450376_at   | 0.028880033  | 9.028152816 | 0.436628238  | 0.672234664 | 0.672234664 | -5.540707485 |
| 1447610_at   | -0.03001665  | 3.407526242 | -0.436619426 | 0.672240833 | 0.672240833 | -5.540711123 |
| 1450974_at   | -0.027997941 | 4.303434478 | -0.436618738 | 0.672241314 | 0.672241314 | -5.540711407 |
| 1415966_a_at | -0.052752371 | 9.958002279 | -0.43658763  | 0.672263088 | 0.672263088 | -5.540724249 |
| 1415881_at   | -0.027331065 | 9.526961167 | -0.436559772 | 0.672282589 | 0.672282589 | -5.54073575  |
| 1458689_at   | -0.040229517 | 4.696113858 | -0.436545206 | 0.672292784 | 0.672292784 | -5.540741763 |
| 1420083_at   | -0.042417034 | 4.385860471 | -0.436462541 | 0.672350651 | 0.672350651 | -5.540775884 |
| 1449055_x_at | 0.058124155  | 8.356344882 | 0.436437638  | 0.672368083 | 0.672368083 | -5.540786162 |
| 1440118_at   | -0.036162726 | 5.870457527 | -0.436397916 | 0.67239589  | 0.67239589  | -5.540802554 |
| 1417410_s_at | 0.02820399   | 9.930786784 | 0.436339257  | 0.672436954 | 0.672436954 | -5.540826759 |
| 1430770_at   | 0.030652605  | 3.313316234 | 0.436324283  | 0.672447437 | 0.672447437 | -5.540832937 |
| 1454402_at   | -0.038230502 | 3.727819912 | -0.436295883 | 0.672467318 | 0.672467318 | -5.540844654 |
| 1442381_at   | 0.058650166  | 7.162688309 | 0.436249905  | 0.672499507 | 0.672499507 | -5.540863623 |
| 1454688_x_at | -0.079361482 | 8.141654751 | -0.436216202 | 0.672523102 | 0.672523102 | -5.540877526 |
| 1419302_at   | 0.045701093  | 6.123406561 | 0.436159184  | 0.672563021 | 0.672563021 | -5.540901044 |
| 1426556_at   | 0.036536318  | 9.367585582 | 0.435986585  | 0.672683865 | 0.672683865 | -5.540972219 |
| 1442710_at   | 0.046967788  | 7.070167077 | 0.435964043  | 0.672699649 | 0.672699649 | -5.540981512 |
| 1441571_at   | 0.04971841   | 5.814578228 | 0.435961089  | 0.672701717 | 0.672701717 | -5.54098273  |
| 1429093_at   | -0.042533786 | 9.038980688 | -0.435951071 | 0.672708731 | 0.672708731 | -5.54098686  |
| 1424098_at   | -0.046507047 | 4.98454184  | -0.435939026 | 0.672717165 | 0.672717165 | -5.540991826 |
| 1455969_at   | 0.04046442   | 5.888693885 | 0.435915546  | 0.672733605 | 0.672733605 | -5.541001505 |
| 1433614_at   | -0.030554432 | 8.47309362  | -0.435915101 | 0.672733917 | 0.672733917 | -5.541001689 |
| 1425850_a_at | 0.038109455  | 8.289642698 | 0.435873857  | 0.672762797 | 0.672762797 | -5.54101869  |
| 1442895_at   | 0.033956001  | 3.394806207 | 0.435842113  | 0.672785024 | 0.672785024 | -5.541031774 |
| 1444412_at   | -0.037037913 | 4.873788585 | -0.435813477 | 0.672805076 | 0.672805076 | -5.541043576 |
| 1435601_at   | -0.029434258 | 8.114311333 | -0.435773951 | 0.672832754 | 0.672832754 | -5.541059866 |
| 1416907_at   | 0.041241243  | 9.224008345 | 0.435771908  | 0.672834184 | 0.672834184 | -5.541060708 |
| 1425237_at   | -0.034341551 | 3.343183246 | -0.435732417 | 0.672861838 | 0.672861838 | -5.541076981 |

|              |              |             |              |             |             |              |
|--------------|--------------|-------------|--------------|-------------|-------------|--------------|
| 1452762_at   | 0.045875253  | 9.338992182 | 0.435722344  | 0.672868892 | 0.672868892 | -5.541081132 |
| 1443027_at   | -0.057753756 | 4.317489781 | -0.435663772 | 0.672909908 | 0.672909908 | -5.541105265 |
| 1423377_at   | 0.040073335  | 5.554997283 | 0.435649067  | 0.672920205 | 0.672920205 | -5.541111323 |
| 1451025_at   | -0.033004299 | 10.51432758 | -0.435644999 | 0.672923055 | 0.672923055 | -5.541112999 |
| 1440547_at   | -0.027736971 | 6.918962495 | -0.435641191 | 0.672925721 | 0.672925721 | -5.541114568 |
| 1417999_at   | 0.036427404  | 11.58607593 | 0.435635154  | 0.672929949 | 0.672929949 | -5.541117055 |
| 1433653_at   | -0.040800856 | 5.619919621 | -0.435609433 | 0.672947961 | 0.672947961 | -5.541127651 |
| 1430479_at   | 0.148667183  | 5.711678858 | 0.435591891  | 0.672960246 | 0.672960246 | -5.541134877 |
| 1432366_at   | -0.043691241 | 4.176844162 | -0.435513258 | 0.673015314 | 0.673015314 | -5.541167266 |
| 1424055_at   | -0.040047588 | 7.835660055 | -0.435478215 | 0.673039855 | 0.673039855 | -5.541181699 |
| 1449499_at   | -0.048198694 | 6.283769338 | -0.435459818 | 0.67305274  | 0.67305274  | -5.541189275 |
| 1453379_at   | 0.036666689  | 3.890597175 | 0.435457898  | 0.673054084 | 0.673054084 | -5.541190066 |
| 1422126_a_at | 0.048111459  | 7.135620483 | 0.435380557  | 0.673108251 | 0.673108251 | -5.541221913 |
| 1431043_at   | -0.090426077 | 5.60491763  | -0.43537612  | 0.673111359 | 0.673111359 | -5.54122374  |
| 1445940_at   | -0.040030911 | 6.595165478 | -0.435356562 | 0.673125057 | 0.673125057 | -5.541231793 |
| 1448293_at   | -0.14766085  | 7.432473736 | -0.435353239 | 0.673127384 | 0.673127384 | -5.541233161 |
| 1447029_at   | 0.039130873  | 4.480697022 | 0.435322376  | 0.673149001 | 0.673149001 | -5.541245867 |
| 1443467_at   | -0.040293679 | 6.260519187 | -0.435275086 | 0.673182122 | 0.673182122 | -5.541265335 |
| 1416282_at   | 0.026857057  | 11.13882606 | 0.435239381  | 0.673207131 | 0.673207131 | -5.541280033 |
| 1452551_at   | -0.047563765 | 5.786082376 | -0.43521905  | 0.673221371 | 0.673221371 | -5.541288401 |
| 1424883_s_at | 0.030095332  | 11.11054915 | 0.435194663  | 0.673238452 | 0.673238452 | -5.541298438 |
| 1425669_at   | -0.038798946 | 5.107258239 | -0.435189563 | 0.673242025 | 0.673242025 | -5.541300538 |
| 1459792_at   | -0.055698108 | 4.48770906  | -0.435150798 | 0.673269177 | 0.673269177 | -5.541316491 |
| 1432040_at   | -0.042139147 | 4.39323589  | -0.43510906  | 0.673298414 | 0.673298414 | -5.541333667 |
| 1432195_s_at | -0.032505983 | 11.23144844 | -0.435100378 | 0.673304495 | 0.673304495 | -5.54133724  |
| 1448515_at   | -0.027381427 | 10.23769916 | -0.435086749 | 0.673314042 | 0.673314042 | -5.541342848 |
| 1447420_at   | 0.030690982  | 3.884022274 | 0.434908318  | 0.673439032 | 0.673439032 | -5.541416254 |
| 1448135_at   | -0.02774078  | 10.65733835 | -0.434905414 | 0.673441067 | 0.673441067 | -5.541417448 |
| 1434861_at   | -0.041675363 | 8.443987639 | -0.434885953 | 0.6734547   | 0.6734547   | -5.541425453 |
| 1425984_at   | 0.033287013  | 3.849217419 | 0.434822386  | 0.673499232 | 0.673499232 | -5.541451596 |
| 1424585_at   | 0.03484752   | 8.168721451 | 0.434797716  | 0.673516515 | 0.673516515 | -5.541461741 |
| 1458769_at   | 0.035635637  | 3.844928329 | 0.43475111   | 0.673549166 | 0.673549166 | -5.541480905 |
| 1418009_at   | -0.042286518 | 3.703716877 | -0.434686348 | 0.673594538 | 0.673594538 | -5.541507532 |
| 1428967_at   | 0.046462203  | 8.510052921 | 0.434564679  | 0.673679782 | 0.673679782 | -5.541557546 |
| 1454222_a_at | -0.036903291 | 6.585997578 | -0.434537222 | 0.673699019 | 0.673699019 | -5.54156883  |
| 1432539_a_at | 0.060836636  | 6.308507197 | 0.434449446  | 0.673760522 | 0.673760522 | -5.541604901 |
| 1416185_a_at | 0.033608482  | 11.23027922 | 0.434410601  | 0.67378774  | 0.67378774  | -5.541620862 |
| 1434411_at   | -0.091678351 | 9.534875121 | -0.434389767 | 0.673802338 | 0.673802338 | -5.541629422 |
| 1453733_a_at | 0.02904789   | 8.480773108 | 0.434378191  | 0.673810449 | 0.673810449 | -5.541634178 |
| 1429868_at   | 0.032864537  | 3.703430046 | 0.434368834  | 0.673817006 | 0.673817006 | -5.541638022 |
| 1427157_at   | 0.038107612  | 3.44730008  | 0.434354728  | 0.67382689  | 0.67382689  | -5.541643817 |
| 1429139_at   | 0.041640224  | 7.212267627 | 0.434350412  | 0.673829914 | 0.673829914 | -5.54164559  |
| 1457322_at   | 0.027448604  | 3.846117097 | 0.434266122  | 0.673888979 | 0.673888979 | -5.541680214 |
| 1417900_a_at | -0.077297472 | 7.785580908 | -0.434260271 | 0.673893079 | 0.673893079 | -5.541682617 |
| 1427420_at   | -0.02855677  | 3.812820125 | -0.434249752 | 0.67390045  | 0.67390045  | -5.541686938 |
| 1418529_at   | 0.036394424  | 8.814175305 | 0.434233695  | 0.673911702 | 0.673911702 | -5.541693533 |
| 1442734_at   | -0.029255102 | 3.568122765 | -0.434173173 | 0.673954114 | 0.673954114 | -5.541718388 |
| 1442558_at   | -0.049869028 | 4.659692246 | -0.434145523 | 0.67397349  | 0.67397349  | -5.541729742 |
| 1459904_at   | -0.042637196 | 3.591521918 | -0.43413098  | 0.673983682 | 0.673983682 | -5.541735714 |
| 1455495_at   | -0.031640185 | 8.374010745 | -0.434124509 | 0.673988216 | 0.673988216 | -5.541738371 |
| 1428189_at   | 0.03067277   | 8.469566456 | 0.434055469  | 0.6740366   | 0.6740366   | -5.541766717 |
| 1452800_a_at | -0.029745285 | 9.026749019 | -0.434027219 | 0.674056398 | 0.674056398 | -5.541778315 |
| 1437960_at   | -0.042218937 | 4.194702685 | -0.434005528 | 0.674071599 | 0.674071599 | -5.541787219 |

|              |              |             |              |             |             |              |
|--------------|--------------|-------------|--------------|-------------|-------------|--------------|
| 1425750_a_at | 0.046227597  | 6.195984562 | 0.433984316  | 0.674086466 | 0.674086466 | -5.541795927 |
| 1455470_x_at | 0.047604263  | 10.20103347 | 0.433980804  | 0.674088927 | 0.674088927 | -5.541797368 |
| 1449908_at   | -0.035570177 | 4.713832397 | -0.433973238 | 0.67409423  | 0.67409423  | -5.541800474 |
| 1430396_at   | 0.033540164  | 3.95697066  | 0.433939621  | 0.67411779  | 0.67411779  | -5.541814272 |
| 1452335_at   | 0.079423096  | 5.858564564 | 0.433912745  | 0.674136626 | 0.674136626 | -5.541825303 |
| 1436227_at   | -0.033861762 | 3.600056566 | -0.433902835 | 0.674143572 | 0.674143572 | -5.54182937  |
| 1442731_at   | 0.037192275  | 6.392565293 | 0.43389263   | 0.674150724 | 0.674150724 | -5.541833558 |
| 1435101_at   | 0.032528326  | 8.147396042 | 0.433889443  | 0.674152958 | 0.674152958 | -5.541834866 |
| 1459643_at   | -0.033239962 | 3.842007976 | -0.433888503 | 0.674153617 | 0.674153617 | -5.541835252 |
| 1418090_at   | 0.036880465  | 8.603088862 | 0.433866977  | 0.674168703 | 0.674168703 | -5.541844086 |
| 1418965_at   | 0.032441435  | 8.366061164 | 0.433861337  | 0.674172656 | 0.674172656 | -5.5418464   |
| 1423600_a_at | 0.058149547  | 6.647994453 | 0.43381674   | 0.674203913 | 0.674203913 | -5.541864701 |
| 1422871_at   | -0.032058385 | 3.619801221 | -0.433778559 | 0.674230675 | 0.674230675 | -5.541880367 |
| 1460116_s_at | 0.090907253  | 7.076669771 | 0.43377744   | 0.674231459 | 0.674231459 | -5.541880826 |
| 1444199_at   | 0.039945213  | 4.713271848 | 0.433743058  | 0.674255557 | 0.674255557 | -5.541894932 |
| 1423957_at   | 0.026395315  | 8.092445706 | 0.433695899  | 0.674288612 | 0.674288612 | -5.541914279 |
| 1433647_s_at | 0.02972188   | 10.37060656 | 0.433656982  | 0.674315891 | 0.674315891 | -5.541930243 |
| 1458015_at   | 0.039510227  | 4.198856707 | 0.433651416  | 0.674319792 | 0.674319792 | -5.541932526 |
| 1416497_at   | 0.049019216  | 8.675547353 | 0.433605539  | 0.67435195  | 0.67435195  | -5.541951343 |
| 1439987_at   | -0.093105667 | 4.285241    | -0.433557749 | 0.674385449 | 0.674385449 | -5.541970943 |
| 1423357_at   | -0.031574038 | 7.774196573 | -0.433446416 | 0.674463493 | 0.674463493 | -5.542016594 |
| 1429831_at   | -0.057673931 | 5.49559542  | -0.433444578 | 0.674464781 | 0.674464781 | -5.542017348 |
| 1450164_at   | -0.034781976 | 4.227603622 | -0.433413169 | 0.6744868   | 0.6744868   | -5.542030225 |
| 1428617_at   | -0.036287046 | 9.068397886 | -0.433338805 | 0.674538932 | 0.674538932 | -5.542060709 |
| 1447628_x_at | 0.029808595  | 5.63077411  | 0.433332151  | 0.674543597 | 0.674543597 | -5.542063437 |
| 1451147_x_at | 0.044188569  | 5.069947988 | 0.433329175  | 0.674545683 | 0.674545683 | -5.542064656 |
| 1423821_at   | 0.064834091  | 7.462246481 | 0.43332613   | 0.674547818 | 0.674547818 | -5.542065904 |
| 1459733_at   | 0.06510384   | 5.637944378 | 0.43324763   | 0.674602851 | 0.674602851 | -5.542098078 |
| 1424908_at   | -0.036762392 | 7.333399718 | -0.433181449 | 0.67464925  | 0.67464925  | -5.542125198 |
| 1418750_at   | -0.042557681 | 4.991430144 | -0.433174781 | 0.674653925 | 0.674653925 | -5.54212793  |
| 1428755_at   | -0.038531244 | 9.177907799 | -0.433162801 | 0.674662324 | 0.674662324 | -5.542132839 |
| 1453761_at   | 0.036220865  | 7.599106319 | 0.433152486  | 0.674669556 | 0.674669556 | -5.542137065 |
| 1452608_at   | -0.03603823  | 7.995512621 | -0.433073789 | 0.674724732 | 0.674724732 | -5.542169307 |
| 1440951_x_at | -0.047693712 | 3.936203187 | -0.433064079 | 0.674731541 | 0.674731541 | -5.542173285 |
| 1445616_at   | -0.043423542 | 3.891221502 | -0.432969662 | 0.674797742 | 0.674797742 | -5.542211959 |
| 1423827_s_at | -0.034700325 | 8.182435306 | -0.432964025 | 0.674801694 | 0.674801694 | -5.542214267 |
| 1425700_at   | -0.03267501  | 5.150583111 | -0.432957111 | 0.674806542 | 0.674806542 | -5.542217099 |
| 1442926_at   | 0.038048922  | 3.29733028  | 0.432956365  | 0.674807065 | 0.674807065 | -5.542217405 |
| 1455272_at   | -0.033373406 | 3.209982606 | -0.432939204 | 0.674819098 | 0.674819098 | -5.542224433 |
| 1423107_at   | -0.028162511 | 10.88698354 | -0.432935315 | 0.674821825 | 0.674821825 | -5.542226025 |
| 1441713_at   | -0.028014745 | 5.468155956 | -0.432877497 | 0.674862366 | 0.674862366 | -5.542249702 |
| 1427081_at   | 0.043867213  | 6.269316801 | 0.432856692  | 0.674876955 | 0.674876955 | -5.542258222 |
| 1459202_at   | -0.038620265 | 4.393631969 | -0.432788935 | 0.674924468 | 0.674924468 | -5.542285964 |
| 1434378_a_at | -0.043936582 | 9.415552222 | -0.432778618 | 0.674931702 | 0.674931702 | -5.542290187 |
| 1427801_at   | 0.034792044  | 3.14360021  | 0.432762472  | 0.674943024 | 0.674943024 | -5.542296797 |
| 1421139_a_at | 0.049975849  | 8.321288344 | 0.432760948  | 0.674944093 | 0.674944093 | -5.542297421 |
| 1429286_at   | 0.033955591  | 5.316596778 | 0.432736505  | 0.674961233 | 0.674961233 | -5.542307427 |
| 1443444_at   | 0.031582062  | 4.614659576 | 0.432649608  | 0.675022171 | 0.675022171 | -5.542342996 |
| 1427352_at   | 0.028674078  | 4.241625354 | 0.432646304  | 0.675024488 | 0.675024488 | -5.542344348 |
| 1422978_at   | 0.031489749  | 4.237386757 | 0.43264585   | 0.675024806 | 0.675024806 | -5.542344533 |
| 1458534_at   | 0.05035421   | 6.798393145 | 0.432610787  | 0.675049395 | 0.675049395 | -5.542358883 |
| 1456323_at   | -0.0367614   | 6.599927575 | -0.432597192 | 0.67505893  | 0.67505893  | -5.542364447 |
| 1441051_at   | 0.041478934  | 5.097762446 | 0.432576557  | 0.6750734   | 0.6750734   | -5.542372891 |

|                                 |                             |                            |                             |                          |                          |                              |
|---------------------------------|-----------------------------|----------------------------|-----------------------------|--------------------------|--------------------------|------------------------------|
| AFFX-PyruCarbMur/<br>1416940_at | 0.032823613<br>-0.029179356 | 5.686276749<br>8.602109825 | 0.432556452<br>-0.432511662 | 0.6750875<br>0.675118912 | 0.6750875<br>0.675118912 | -5.542381118<br>-5.542399445 |
| 1448634_at                      | 0.037673134                 | 8.882078101                | 0.432416969                 | 0.675185324              | 0.675185324              | -5.542438184                 |
| 1425451_s_at                    | 0.035788275                 | 4.346423743                | 0.432352933                 | 0.675230236              | 0.675230236              | -5.542464377                 |
| 1459989_at                      | -0.049304734                | 4.532236563                | -0.432351878                | 0.675230977              | 0.675230977              | -5.542464809                 |
| 1459010_at                      | 0.030484279                 | 6.771936817                | 0.432335771                 | 0.675242274              | 0.675242274              | -5.542471397                 |
| 1421632_at                      | -0.040843562                | 5.076875707                | -0.432304352                | 0.67526431               | 0.67526431               | -5.542484246                 |
| 1438331_at                      | 0.035158497                 | 5.965436524                | 0.432292712                 | 0.675272474              | 0.675272474              | -5.542489007                 |
| 1442246_at                      | -0.03817143                 | 3.96409592                 | -0.432279571                | 0.675281692              | 0.675281692              | -5.542494381                 |
| 1416103_at                      | -0.103572895                | 8.617343175                | -0.432208738                | 0.675331374              | 0.675331374              | -5.542523345                 |
| 1417944_at                      | 0.033734272                 | 6.903911811                | 0.432179664                 | 0.675351767              | 0.675351767              | -5.542535232                 |
| 1455701_at                      | 0.0757399                   | 7.204143273                | 0.432175872                 | 0.675354428              | 0.675354428              | -5.542536783                 |
| 1428932_at                      | -0.040697976                | 4.593870093                | -0.432160305                | 0.675365346              | 0.675365346              | -5.542543147                 |
| 1439669_at                      | -0.039169751                | 4.367968847                | -0.432147697                | 0.67537419               | 0.67537419               | -5.542548301                 |
| 1436276_at                      | 0.037767272                 | 6.294765692                | 0.432049284                 | 0.675443223              | 0.675443223              | -5.54258853                  |
| 1454918_at                      | 0.033295153                 | 8.780447548                | 0.432016191                 | 0.675466437              | 0.675466437              | -5.542602056                 |
| 1456245_x_at                    | 0.03884502                  | 9.799829793                | 0.432004404                 | 0.675474705              | 0.675474705              | -5.542606873                 |
| 1442388_at                      | -0.052312737                | 4.325347621                | -0.431953015                | 0.675510754              | 0.675510754              | -5.542627874                 |
| 1432338_at                      | 0.038307077                 | 3.635662525                | 0.431905105                 | 0.675544364              | 0.675544364              | -5.542647452                 |
| 1420372_at                      | 0.040672292                 | 8.150409917                | 0.431855244                 | 0.675579343              | 0.675579343              | -5.542667824                 |
| 1439745_at                      | -0.036252606                | 7.954309195                | -0.43180875                 | 0.675611961              | 0.675611961              | -5.542686818                 |
| 1426801_at                      | 0.041841394                 | 9.816858804                | 0.43179493                  | 0.675621656              | 0.675621656              | -5.542692464                 |
| 1423472_at                      | -0.026577126                | 10.56195603                | -0.431760616                | 0.67564573               | 0.67564573               | -5.542706481                 |
| 1444849_at                      | 0.02627048                  | 5.891383137                | 0.431711351                 | 0.675680293              | 0.675680293              | -5.542726603                 |
| 1440829_x_at                    | -0.036850978                | 3.974748307                | -0.431706742                | 0.675683526              | 0.675683526              | -5.542728485                 |
| 1443711_at                      | -0.029336073                | 3.400782898                | -0.431642385                | 0.675728679              | 0.675728679              | -5.542754768                 |
| 1431968_at                      | -0.031203786                | 3.363739606                | -0.431572801                | 0.675777501              | 0.675777501              | -5.542783182                 |
| 1418259_a_at                    | 0.033809482                 | 5.589820052                | 0.431535797                 | 0.675803464              | 0.675803464              | -5.54279829                  |
| 1443605_at                      | 0.060113061                 | 4.055774757                | 0.43153135                  | 0.675806584              | 0.675806584              | -5.542800105                 |
| 1443169_at                      | 0.04036445                  | 4.758462867                | 0.431496242                 | 0.675831217              | 0.675831217              | -5.542814438                 |
| 1426668_at                      | 0.032087949                 | 9.264053849                | 0.431469538                 | 0.675849955              | 0.675849955              | -5.54282534                  |
| 1441452_at                      | 0.049804506                 | 6.375211146                | 0.431438212                 | 0.675871935              | 0.675871935              | -5.542838127                 |
| 1447648_at                      | -0.030539014                | 3.160448985                | -0.431388272                | 0.675906977              | 0.675906977              | -5.54285851                  |
| 1440362_at                      | 0.03386351                  | 4.161033438                | 0.43135481                  | 0.675930457              | 0.675930457              | -5.542872166                 |
| 1417057_a_at                    | -0.040774394                | 10.79135406                | -0.431308715                | 0.675962803              | 0.675962803              | -5.542890977                 |
| 1426186_a_at                    | 0.043877945                 | 3.865285832                | 0.431246736                 | 0.676006295              | 0.676006295              | -5.542916267                 |
| 1456162_x_at                    | -0.029495317                | 8.004322043                | -0.431228326                | 0.676019214              | 0.676019214              | -5.542923778                 |
| 1421590_at                      | -0.050461959                | 3.671683604                | -0.431211528                | 0.676031002              | 0.676031002              | -5.542930631                 |
| 1415722_a_at                    | 0.032018317                 | 9.759215361                | 0.431131185                 | 0.676087383              | 0.676087383              | -5.542963406                 |
| 1441522_at                      | -0.035146465                | 6.395350108                | -0.431101043                | 0.676108536              | 0.676108536              | -5.542975701                 |
| 1455906_at                      | 0.036198727                 | 6.040382132                | 0.431075927                 | 0.676126163              | 0.676126163              | -5.542985945                 |
| 1448986_x_at                    | -0.05933842                 | 8.127152301                | -0.431009621                | 0.676172697              | 0.676172697              | -5.543012986                 |
| 1416277_a_at                    | -0.028662028                | 13.59279197                | -0.431009178                | 0.676173007              | 0.676173007              | -5.543013166                 |
| 1441157_at                      | 0.032407596                 | 6.976528326                | 0.430937188                 | 0.676223532              | 0.676223532              | -5.543042521                 |
| 1438123_at                      | -0.080684275                | 3.844239977                | -0.430863809                | 0.676275033              | 0.676275033              | -5.543072437                 |
| 1445147_at                      | -0.038103112                | 7.124454207                | -0.430840654                | 0.676291284              | 0.676291284              | -5.543081876                 |
| 1455834_x_at                    | 0.030460297                 | 8.061105069                | 0.430803538                 | 0.676317336              | 0.676317336              | -5.543097006                 |
| 1437003_at                      | 0.032992508                 | 7.500355906                | 0.430726345                 | 0.676371517              | 0.676371517              | -5.543128467                 |
| 1429751_at                      | -0.038892352                | 3.622181352                | -0.430662449                | 0.676416366              | 0.676416366              | -5.543154505                 |
| 1457830_at                      | 0.034598958                 | 5.866109353                | 0.430636266                 | 0.676434745              | 0.676434745              | -5.543165174                 |
| 1448231_at                      | -0.038047023                | 7.528610267                | -0.430632153                | 0.676437633              | 0.676437633              | -5.54316685                  |
| 1420010_at                      | -0.035476852                | 4.889611826                | -0.430613123                | 0.67645099               | 0.67645099               | -5.543174603                 |
| 1440740_at                      | -0.037806892                | 7.749390284                | -0.430550956                | 0.676494629              | 0.676494629              | -5.54319993                  |

|              |              |             |              |             |             |              |
|--------------|--------------|-------------|--------------|-------------|-------------|--------------|
| 1425036_a_at | -0.029624318 | 10.24472876 | -0.43054632  | 0.676497883 | 0.676497883 | -5.543201819 |
| 1442678_at   | 0.042784102  | 4.313464422 | 0.430498404  | 0.676531519 | 0.676531519 | -5.543221338 |
| 1437296_at   | -0.029953371 | 7.273785184 | -0.430493378 | 0.676535047 | 0.676535047 | -5.543223385 |
| 1429341_at   | -0.037578788 | 3.177371697 | -0.430485726 | 0.676540418 | 0.676540418 | -5.543226502 |
| 1452198_at   | 0.044317119  | 9.243346696 | 0.430400669  | 0.676600128 | 0.676600128 | -5.543261144 |
| 1426101_at   | -0.030765108 | 3.949206279 | -0.4303987   | 0.676601511 | 0.676601511 | -5.543261946 |
| 1460078_at   | 0.045496494  | 5.030007038 | 0.430382652  | 0.676612777 | 0.676612777 | -5.543268481 |
| 1422832_at   | -0.06132199  | 3.904745886 | -0.430336518 | 0.676645164 | 0.676645164 | -5.543287267 |
| 1460069_at   | 0.034166456  | 5.882852288 | 0.430319537  | 0.676657086 | 0.676657086 | -5.543294181 |
| 1435703_at   | 0.042837219  | 5.64226178  | 0.430213072  | 0.676731831 | 0.676731831 | -5.543337525 |
| 1460175_at   | 0.026256699  | 13.5829242  | 0.430173414  | 0.676759674 | 0.676759674 | -5.543353668 |
| 1423802_at   | -0.04485216  | 5.697752912 | -0.430164462 | 0.676765958 | 0.676765958 | -5.543357312 |
| 1455508_at   | 0.028351114  | 8.998988852 | 0.430158251  | 0.676770319 | 0.676770319 | -5.54335984  |
| 1425131_at   | 0.039404012  | 4.595634581 | 0.430138531  | 0.676784164 | 0.676784164 | -5.543367866 |
| 1447384_at   | 0.044934034  | 4.801421286 | 0.43009558   | 0.676814321 | 0.676814321 | -5.543385347 |
| 1450849_at   | 0.037962543  | 10.23403364 | 0.430087452  | 0.676820028 | 0.676820028 | -5.543388654 |
| 1420722_at   | -0.043624554 | 4.189857428 | -0.430074792 | 0.676828917 | 0.676828917 | -5.543393806 |
| 1458787_at   | 0.03751176   | 3.717048206 | 0.430058936  | 0.67684005  | 0.67684005  | -5.543400259 |
| 1425836_a_at | 0.036619183  | 6.736977893 | 0.430018689  | 0.676868308 | 0.676868308 | -5.543416636 |
| 1445249_at   | -0.026625942 | 3.161601036 | -0.430014033 | 0.676871577 | 0.676871577 | -5.54341853  |
| 1429954_at   | -0.084262657 | 4.214534224 | -0.429963506 | 0.676907055 | 0.676907055 | -5.543439088 |
| 1451571_s_at | 0.033540838  | 7.70405854  | 0.42995061   | 0.67691611  | 0.67691611  | -5.543444335 |
| 1420777_a_at | 0.037834213  | 3.444239961 | 0.429940213  | 0.676923411 | 0.676923411 | -5.543448565 |
| 1442580_at   | -0.028392767 | 3.518664002 | -0.429936141 | 0.676926269 | 0.676926269 | -5.543450221 |
| 1445842_at   | -0.046487804 | 4.351716751 | -0.429917915 | 0.676939067 | 0.676939067 | -5.543457636 |
| 1436566_at   | 0.046117041  | 7.226957617 | 0.429912672  | 0.676942749 | 0.676942749 | -5.543459768 |
| 1417840_at   | 0.03912258   | 8.873677171 | 0.429898795  | 0.676952493 | 0.676952493 | -5.543465414 |
| 1433018_at   | -0.056009391 | 3.382466525 | -0.429844693 | 0.676990483 | 0.676990483 | -5.54348742  |
| 1458429_at   | -0.041406263 | 5.630565973 | -0.429842423 | 0.676992076 | 0.676992076 | -5.543488343 |
| 1453483_at   | -0.027759501 | 5.546785704 | -0.429826883 | 0.677002989 | 0.677002989 | -5.543494664 |
| 1433784_at   | 0.032476515  | 9.968820383 | 0.429814013  | 0.677012026 | 0.677012026 | -5.543499898 |
| 1419216_at   | -0.039988392 | 7.575982719 | -0.429762903 | 0.677047917 | 0.677047917 | -5.543520684 |
| 1432857_at   | -0.042610636 | 3.836803512 | -0.429726636 | 0.677073384 | 0.677073384 | -5.543535432 |
| 1445922_at   | -0.050473436 | 5.160886082 | -0.429636584 | 0.677136623 | 0.677136623 | -5.543572046 |
| 1429657_at   | -0.039795718 | 3.787169825 | -0.429599135 | 0.677162923 | 0.677162923 | -5.543587271 |
| 1446535_at   | 0.063301646  | 4.613824531 | 0.429517851  | 0.677220008 | 0.677220008 | -5.543620311 |
| 1424114_s_at | 0.03929149   | 10.84124386 | 0.429505514  | 0.677228672 | 0.677228672 | -5.543625325 |
| 1422966_a_at | 0.030850896  | 6.768533826 | 0.429501301  | 0.677231631 | 0.677231631 | -5.543627037 |
| 1420354_at   | -0.035843899 | 4.316384663 | -0.429492894 | 0.677237535 | 0.677237535 | -5.543630454 |
| 1451114_at   | 0.029950189  | 8.24479151  | 0.429407147  | 0.677297758 | 0.677297758 | -5.5436653   |
| 1430758_x_at | 0.030145401  | 4.359409221 | 0.429329463  | 0.677352319 | 0.677352319 | -5.543696864 |
| 1429703_at   | 0.045866709  | 5.621861174 | 0.429326893  | 0.677354124 | 0.677354124 | -5.543697908 |
| 1434879_at   | 0.035779847  | 9.019444938 | 0.429296399  | 0.677375542 | 0.677375542 | -5.543710296 |
| 1454545_at   | -0.029797434 | 3.796979931 | -0.429284079 | 0.677384195 | 0.677384195 | -5.543715301 |
| 1453118_s_at | 0.025684058  | 13.30506811 | 0.42924592   | 0.677410998 | 0.677410998 | -5.543730802 |
| 1431271_at   | -0.091124687 | 5.968287638 | -0.429240974 | 0.677414472 | 0.677414472 | -5.543732811 |
| 1447637_at   | -0.034753814 | 4.355372586 | -0.429214469 | 0.677433089 | 0.677433089 | -5.543743577 |
| 1444484_at   | 0.031388578  | 3.575422218 | 0.429183176  | 0.677455069 | 0.677455069 | -5.543756286 |
| 1439718_at   | 0.036423275  | 4.400298231 | 0.429153233  | 0.677476102 | 0.677476102 | -5.543768447 |
| 1440725_at   | 0.030520435  | 3.436104335 | 0.429119286  | 0.677499947 | 0.677499947 | -5.543782233 |
| 1439256_x_at | 0.043226232  | 7.484764289 | 0.429116666  | 0.677501788 | 0.677501788 | -5.543783297 |
| 1458469_at   | -0.038121312 | 7.834800608 | -0.429023111 | 0.677567505 | 0.677567505 | -5.543821283 |
| 1429813_at   | 0.054965545  | 5.114498009 | 0.429020406  | 0.677569406 | 0.677569406 | -5.543822382 |

|              |              |             |              |             |             |              |
|--------------|--------------|-------------|--------------|-------------|-------------|--------------|
| 1428213_at   | 0.030939007  | 9.95899698  | 0.428935712  | 0.677628902 | 0.677628902 | -5.543856763 |
| 1437574_at   | -0.033387603 | 6.838179252 | -0.428908584 | 0.677647959 | 0.677647959 | -5.543867775 |
| 1416187_s_at | 0.074439494  | 9.607870734 | 0.428908292  | 0.677648164 | 0.677648164 | -5.543867893 |
| 1430301_at   | 0.039034996  | 5.010659484 | 0.428836563  | 0.677698555 | 0.677698555 | -5.543897005 |
| 1442295_at   | 0.048889006  | 5.515338313 | 0.4287573    | 0.67775424  | 0.67775424  | -5.543929169 |
| 1429370_a_at | 0.031679691  | 9.683360189 | 0.428751965  | 0.677757988 | 0.677757988 | -5.543931334 |
| 1432218_a_at | 0.036974373  | 5.970448229 | 0.428673206  | 0.677813322 | 0.677813322 | -5.543963287 |
| 1441856_x_at | -0.033221563 | 5.978560109 | -0.428560024 | 0.677892844 | 0.677892844 | -5.544009197 |
| 1455080_at   | -0.050383627 | 6.091873251 | -0.428550537 | 0.677899509 | 0.677899509 | -5.544013045 |
| 1422909_at   | 0.035601191  | 5.31286632  | 0.428475234  | 0.677952419 | 0.677952419 | -5.544043582 |
| 1428472_at   | 0.047012189  | 6.391363352 | 0.428420854  | 0.67799063  | 0.67799063  | -5.544065632 |
| 1432409_at   | -0.039435444 | 4.600247282 | -0.428417798 | 0.677992777 | 0.677992777 | -5.544066871 |
| 1438429_at   | 0.028836764  | 10.19287256 | 0.428377363  | 0.678021189 | 0.678021189 | -5.544083264 |
| 1449969_at   | 0.093305925  | 5.066858265 | 0.428375731  | 0.678022336 | 0.678022336 | -5.544083926 |
| 1459862_at   | -0.047489767 | 3.320278399 | -0.428372662 | 0.678024492 | 0.678024492 | -5.54408517  |
| 1419779_at   | -0.034179432 | 3.675554044 | -0.428334395 | 0.678051382 | 0.678051382 | -5.544100683 |
| 1453715_at   | -0.043295562 | 4.239770532 | -0.428330407 | 0.678054185 | 0.678054185 | -5.5441023   |
| 1452114_s_at | 0.030538135  | 12.97329413 | 0.42827508   | 0.678093063 | 0.678093063 | -5.544124726 |
| 1438587_at   | 0.030761699  | 4.657442645 | 0.428254211  | 0.678107728 | 0.678107728 | -5.544133185 |
| 1420979_at   | -0.033297563 | 7.63041456  | -0.428191998 | 0.678151446 | 0.678151446 | -5.544158397 |
| 1438462_x_at | 0.027331101  | 10.01314982 | 0.428105225  | 0.678212426 | 0.678212426 | -5.544193558 |
| 1437289_at   | 0.030953237  | 9.622342264 | 0.428087575  | 0.67822483  | 0.67822483  | -5.544200709 |
| 1417180_at   | 0.033280338  | 7.851146214 | 0.428067728  | 0.678238778 | 0.678238778 | -5.54420875  |
| 1421819_a_at | -0.034237304 | 11.6030912  | -0.428062073 | 0.678242753 | 0.678242753 | -5.544211041 |
| 1421957_a_at | 0.032913822  | 8.028881615 | 0.428059384  | 0.678244642 | 0.678244642 | -5.54421213  |
| 1425550_a_at | -0.027257715 | 10.73618566 | -0.4280466   | 0.678253626 | 0.678253626 | -5.544217309 |
| 1426965_at   | -0.031769241 | 8.818510807 | -0.427991356 | 0.678292452 | 0.678292452 | -5.544239688 |
| 1456158_at   | 0.047777862  | 4.762557771 | 0.427937514  | 0.678330293 | 0.678330293 | -5.544261496 |
| 1439091_at   | -0.032867043 | 6.890579453 | -0.427870668 | 0.678377274 | 0.678377274 | -5.544288567 |
| 1428043_a_at | 0.043959865  | 4.113970938 | 0.427847724  | 0.6783934   | 0.6783934   | -5.544297858 |
| 1429723_at   | -0.029708828 | 7.915560006 | -0.427724297 | 0.678480154 | 0.678480154 | -5.544347831 |
| 1432449_at   | -0.037433693 | 3.896196768 | -0.427652752 | 0.678530442 | 0.678530442 | -5.544376791 |
| 1453456_at   | -0.069128068 | 4.375658667 | -0.427615382 | 0.67855671  | 0.67855671  | -5.544391916 |
| 1425930_a_at | 0.044077838  | 7.605992317 | 0.42759573   | 0.678570524 | 0.678570524 | -5.544399869 |
| 1448225_at   | -0.028283138 | 8.806905859 | -0.427589894 | 0.678574627 | 0.678574627 | -5.544402231 |
| 1441028_at   | -0.063556317 | 4.889063904 | -0.427523835 | 0.678621062 | 0.678621062 | -5.544428963 |
| 1436388_a_at | 0.049890727  | 8.731302038 | 0.427509118  | 0.678631408 | 0.678631408 | -5.544434918 |
| 1454616_at   | 0.034401624  | 8.8535471   | 0.427489759  | 0.678645017 | 0.678645017 | -5.544442751 |
| 1440575_at   | -0.062773337 | 6.995965157 | -0.427488049 | 0.678646219 | 0.678646219 | -5.544443443 |
| 1424476_at   | 0.037906045  | 3.567800026 | 0.427440666  | 0.678679528 | 0.678679528 | -5.544462613 |
| 1436368_at   | 0.0254816    | 6.843380427 | 0.427331567  | 0.678756225 | 0.678756225 | -5.544506745 |
| 1433329_at   | -0.040935814 | 5.59102088  | -0.427324427 | 0.678761244 | 0.678761244 | -5.544509633 |
| 1446965_at   | -0.041513388 | 7.67902691  | -0.427301764 | 0.678777176 | 0.678777176 | -5.544518799 |
| 1441976_at   | -0.038161884 | 7.966294114 | -0.427285514 | 0.678788601 | 0.678788601 | -5.544525371 |
| 1444821_at   | 0.061435181  | 5.849307142 | 0.427265328  | 0.678802792 | 0.678802792 | -5.544533534 |
| 1438820_at   | -0.027701382 | 3.924590372 | -0.42724198  | 0.678819207 | 0.678819207 | -5.544542976 |
| 1439111_at   | 0.090242706  | 8.590338605 | 0.427177542  | 0.678864511 | 0.678864511 | -5.544569032 |
| 1425194_a_at | 0.032781638  | 11.0418115  | 0.427158773  | 0.678877707 | 0.678877707 | -5.54457662  |
| 1421766_at   | -0.026129076 | 3.197618165 | -0.427153304 | 0.678881552 | 0.678881552 | -5.544578831 |
| 1459211_at   | 0.034485009  | 9.604913389 | 0.427137213  | 0.678892865 | 0.678892865 | -5.544585337 |
| 1452786_at   | 0.048110435  | 7.579998242 | 0.427119935  | 0.678905013 | 0.678905013 | -5.544592322 |
| 1426898_at   | 0.041233054  | 7.633417147 | 0.427105346  | 0.67891527  | 0.67891527  | -5.54459822  |
| 1446088_at   | 0.048858284  | 7.492771159 | 0.427072011  | 0.678938708 | 0.678938708 | -5.544611695 |

|              |              |             |              |             |             |              |
|--------------|--------------|-------------|--------------|-------------|-------------|--------------|
| 1423430_at   | -0.04830109  | 8.907364519 | -0.427052031 | 0.678952756 | 0.678952756 | -5.544619771 |
| 1422848_a_at | 0.033220204  | 11.72386072 | 0.427050416  | 0.678953891 | 0.678953891 | -5.544620424 |
| 1447829_x_at | 0.026963486  | 3.114505249 | 0.426981036  | 0.679002674 | 0.679002674 | -5.544648466 |
| 1439315_at   | 0.040005912  | 3.613146415 | 0.426972939  | 0.679008368 | 0.679008368 | -5.544651738 |
| 1417592_at   | 0.027620774  | 8.400535102 | 0.42695451   | 0.679021325 | 0.679021325 | -5.544659186 |
| 1434614_at   | -0.037954195 | 3.893463942 | -0.426925141 | 0.679041976 | 0.679041976 | -5.544671054 |
| 1445183_s_at | -0.045254467 | 4.315135959 | -0.426880856 | 0.679073116 | 0.679073116 | -5.544688949 |
| 1421248_at   | -0.039466261 | 5.502728511 | -0.426871959 | 0.679079372 | 0.679079372 | -5.544692543 |
| 1430670_at   | -0.04167787  | 4.503621347 | -0.426857996 | 0.67908919  | 0.67908919  | -5.544698185 |
| 1415990_at   | -0.028726809 | 11.71305246 | -0.426844754 | 0.679098501 | 0.679098501 | -5.544703535 |
| 1460465_at   | 0.060143176  | 9.82493059  | 0.426828051  | 0.679110247 | 0.679110247 | -5.544710283 |
| 1428525_at   | 0.084922003  | 4.549393299 | 0.426825715  | 0.679111889 | 0.679111889 | -5.544711227 |
| 1431406_at   | 0.034954523  | 3.482489368 | 0.426783494  | 0.679141578 | 0.679141578 | -5.544728284 |
| 1435453_at   | 0.051358702  | 5.25478029  | 0.426783117  | 0.679141843 | 0.679141843 | -5.544728436 |
| 1460030_at   | -0.035244644 | 3.913422156 | -0.426768133 | 0.679152381 | 0.679152381 | -5.544734489 |
| 1448202_x_at | 0.030322002  | 11.19565207 | 0.426719017  | 0.67918692  | 0.67918692  | -5.544754329 |
| 1434194_at   | 0.054529944  | 7.539914824 | 0.426688536  | 0.679208354 | 0.679208354 | -5.54476664  |
| 1438070_at   | 0.045495205  | 7.580240623 | 0.426677458  | 0.679216144 | 0.679216144 | -5.544771114 |
| 1435666_at   | -0.042554399 | 7.851271295 | -0.426647784 | 0.679237012 | 0.679237012 | -5.544783098 |
| 1422821_s_at | 0.033279553  | 7.666311546 | 0.42651511   | 0.679330317 | 0.679330317 | -5.544836669 |
| 1426079_at   | 0.03537079   | 3.780622828 | 0.426511794  | 0.679332649 | 0.679332649 | -5.544838008 |
| 1429914_at   | -0.050502119 | 7.625056617 | -0.426499208 | 0.679341501 | 0.679341501 | -5.544843089 |
| 1439316_at   | -0.042522857 | 8.569853392 | -0.426491608 | 0.679346846 | 0.679346846 | -5.544846157 |
| 1440051_at   | 0.029802228  | 7.604282573 | 0.426490305  | 0.679347762 | 0.679347762 | -5.544846683 |
| 1427255_s_at | 0.026969483  | 9.643971005 | 0.426484069  | 0.679352148 | 0.679352148 | -5.544849201 |
| 1431274_a_at | 0.037999441  | 6.432695455 | 0.426464427  | 0.679365962 | 0.679365962 | -5.54485713  |
| 1445854_at   | -0.046137204 | 4.090334372 | -0.426463833 | 0.67936638  | 0.67936638  | -5.54485737  |
| 1458129_at   | -0.036230442 | 5.683628769 | -0.426445566 | 0.679379227 | 0.679379227 | -5.544864744 |
| 1435841_s_at | 0.026684552  | 9.643551965 | 0.426441375  | 0.679382174 | 0.679382174 | -5.544866435 |
| 1447273_x_at | 0.035848071  | 3.883773778 | 0.426407323  | 0.679406124 | 0.679406124 | -5.54488018  |
| 1420730_a_at | -0.055590325 | 7.274247317 | -0.426370549 | 0.679431988 | 0.679431988 | -5.544895022 |
| 1438141_at   | -0.045430353 | 4.998310089 | -0.426320881 | 0.679466921 | 0.679466921 | -5.544915067 |
| 1443471_at   | -0.049712119 | 6.075526205 | -0.426303534 | 0.679479122 | 0.679479122 | -5.544922067 |
| 1445279_at   | -0.033333943 | 3.283636693 | -0.426275729 | 0.679498679 | 0.679498679 | -5.544933287 |
| 1417000_at   | 0.036879338  | 7.108418241 | 0.426238554  | 0.679524827 | 0.679524827 | -5.544948286 |
| 1430334_at   | -0.05187426  | 4.917250312 | -0.426163984 | 0.679577278 | 0.679577278 | -5.544978371 |
| 1455716_at   | 0.041569248  | 5.130383511 | 0.426159007  | 0.679580779 | 0.679580779 | -5.544980378 |
| 1440011_at   | -0.032672273 | 8.808140093 | -0.426133692 | 0.679598586 | 0.679598586 | -5.544990591 |
| 1446852_at   | 0.028042759  | 3.221412316 | 0.426057455  | 0.679652212 | 0.679652212 | -5.54502134  |
| 1431621_at   | -0.028748736 | 3.854389024 | -0.425988889 | 0.679700445 | 0.679700445 | -5.545048991 |
| 1456726_x_at | 0.046783099  | 10.42134081 | 0.425982897  | 0.67970466  | 0.67970466  | -5.545051407 |
| 1443879_at   | 0.029130213  | 3.745386436 | 0.425961377  | 0.679719798 | 0.679719798 | -5.545060085 |
| 1426989_at   | 0.029573892  | 6.883480457 | 0.425948409  | 0.679728921 | 0.679728921 | -5.545065314 |
| 1428314_at   | 0.028499352  | 11.39400523 | 0.425936666  | 0.679737181 | 0.679737181 | -5.545070048 |
| 1439688_at   | 0.039954241  | 6.109795451 | 0.425902248  | 0.679761394 | 0.679761394 | -5.545083925 |
| 1422198_a_at | -0.02802078  | 7.344630505 | -0.425865821 | 0.67978702  | 0.67978702  | -5.545098611 |
| 1444282_at   | -0.042754235 | 4.022790562 | -0.42586445  | 0.679787985 | 0.679787985 | -5.545099164 |
| 1458002_at   | 0.040375032  | 4.061108648 | 0.425858846  | 0.679791927 | 0.679791927 | -5.545101423 |
| 1459893_at   | -0.032510255 | 5.240920781 | -0.425812079 | 0.679824828 | 0.679824828 | -5.545120275 |
| 1431393_at   | -0.098159229 | 5.718723399 | -0.425725402 | 0.679885808 | 0.679885808 | -5.54515521  |
| 1434841_at   | -0.033861446 | 8.125772968 | -0.425723379 | 0.67988723  | 0.67988723  | -5.545156025 |
| 1425672_a_at | 0.032950165  | 5.689501957 | 0.425702603  | 0.679901848 | 0.679901848 | -5.545164398 |
| 1453915_a_at | 0.028552087  | 8.950011129 | 0.425677591  | 0.679919445 | 0.679919445 | -5.545174477 |

|              |              |             |              |             |             |              |
|--------------|--------------|-------------|--------------|-------------|-------------|--------------|
| 1438416_at   | 0.038477082  | 8.396759736 | 0.425644012  | 0.67994307  | 0.67994307  | -5.545188008 |
| 1455439_a_at | 0.026713073  | 13.51981878 | 0.425622171  | 0.679958436 | 0.679958436 | -5.545196808 |
| 1446602_at   | 0.042415809  | 3.286190824 | 0.425598688  | 0.679974959 | 0.679974959 | -5.545206269 |
| 1452429_s_at | -0.042167369 | 8.125524565 | -0.425514639 | 0.680034095 | 0.680034095 | -5.545240129 |
| 1416270_at   | 0.029432532  | 10.39154439 | 0.42551397   | 0.680034565 | 0.680034565 | -5.545240398 |
| 1420026_at   | -0.035644117 | 4.414231942 | -0.425499651 | 0.680044641 | 0.680044641 | -5.545246166 |
| 1455608_at   | 0.039228803  | 7.63702966  | 0.425434948  | 0.680090168 | 0.680090168 | -5.545272227 |
| 1460010_a_at | -0.039482478 | 8.662092674 | -0.425388497 | 0.680122852 | 0.680122852 | -5.545290933 |
| 1421796_a_at | -0.041452661 | 4.592444666 | -0.425370139 | 0.68013577  | 0.68013577  | -5.545298326 |
| 1420727_a_at | 0.040667093  | 8.220772099 | 0.425339903  | 0.680157046 | 0.680157046 | -5.545310501 |
| 1451227_a_at | -0.027591088 | 7.650667159 | -0.425260998 | 0.68021257  | 0.68021257  | -5.54534227  |
| 1421179_at   | 0.047818987  | 4.874281887 | 0.425254259  | 0.680217312 | 0.680217312 | -5.545344983 |
| 1439131_at   | -0.036400933 | 7.535308902 | -0.425232628 | 0.680232534 | 0.680232534 | -5.545353691 |
| 1449386_at   | 0.035382799  | 4.196836751 | 0.425223905  | 0.680238672 | 0.680238672 | -5.545357202 |
| 1432797_at   | 0.02820345   | 3.920707552 | 0.425154208  | 0.680287719 | 0.680287719 | -5.545385257 |
| 1444565_at   | -0.034804336 | 5.581466419 | -0.425114089 | 0.680315952 | 0.680315952 | -5.545401404 |
| 1421400_at   | -0.043129442 | 4.161289402 | -0.42503468  | 0.680371836 | 0.680371836 | -5.545433359 |
| 1455457_at   | -0.051459036 | 4.289786985 | -0.425006812 | 0.680391449 | 0.680391449 | -5.545444573 |
| 1428074_at   | -0.050070795 | 7.46383817  | -0.424984617 | 0.680407069 | 0.680407069 | -5.545453503 |
| 1441538_at   | -0.046803885 | 4.834073939 | -0.424969667 | 0.680417591 | 0.680417591 | -5.545459518 |
| 1446102_at   | 0.055300558  | 4.761489732 | 0.424966505  | 0.680419816 | 0.680419816 | -5.545460789 |
| 1440611_at   | -0.032324672 | 6.398752523 | -0.424933282 | 0.680443198 | 0.680443198 | -5.545474155 |
| 1444889_at   | 0.036588653  | 3.671315052 | 0.424915648  | 0.680455609 | 0.680455609 | -5.545481249 |
| 1449204_at   | -0.031138647 | 4.5961687   | -0.424878463 | 0.68048178  | 0.68048178  | -5.545496207 |
| 1447284_at   | -0.028640156 | 5.996771607 | -0.424876411 | 0.680483224 | 0.680483224 | -5.545497032 |
| 1434307_at   | -0.036672117 | 8.463046578 | -0.424857526 | 0.680496516 | 0.680496516 | -5.545504628 |
| 1444074_at   | -0.031788246 | 3.550037409 | -0.424853683 | 0.680499221 | 0.680499221 | -5.545506174 |
| 1428503_a_at | 0.030665165  | 7.638789879 | 0.424818615  | 0.680523903 | 0.680523903 | -5.545520279 |
| 1431480_at   | -0.033630437 | 3.583466627 | -0.424816148 | 0.680525639 | 0.680525639 | -5.545521271 |
| 1438803_s_at | 0.044093327  | 7.972355493 | 0.424776868  | 0.680553286 | 0.680553286 | -5.545537068 |
| 1438494_at   | 0.03675776   | 4.051261641 | 0.424775709  | 0.680554102 | 0.680554102 | -5.545537534 |
| 1444042_at   | -0.041745885 | 4.948383787 | -0.424755002 | 0.680568677 | 0.680568677 | -5.545545861 |
| 1459636_at   | -0.02725939  | 3.829987864 | -0.424737372 | 0.680581086 | 0.680581086 | -5.54555295  |
| 1447350_at   | -0.034970954 | 3.334811192 | -0.424727816 | 0.680587812 | 0.680587812 | -5.545556793 |
| 1450667_a_at | 0.038385826  | 10.89594404 | 0.424713739  | 0.68059772  | 0.68059772  | -5.545562453 |
| 1449820_at   | -0.03360382  | 6.773321196 | -0.424678024 | 0.680622859 | 0.680622859 | -5.545576813 |
| 1433359_at   | -0.042223211 | 4.390708108 | -0.424666904 | 0.680630686 | 0.680630686 | -5.545581284 |
| 1458140_at   | 0.045968767  | 8.403239699 | 0.424629018  | 0.680657354 | 0.680657354 | -5.545596516 |
| 1415726_at   | 0.025747814  | 9.693246543 | 0.42462789   | 0.680658148 | 0.680658148 | -5.545596969 |
| 1416566_at   | -0.036416005 | 10.33802757 | -0.424511523 | 0.68074006  | 0.68074006  | -5.545643744 |
| 1423040_at   | 0.031706327  | 10.4923018  | 0.424479869  | 0.680762343 | 0.680762343 | -5.545656465 |
| 1440103_at   | 0.051685313  | 4.634331037 | 0.424449341  | 0.680783833 | 0.680783833 | -5.545668733 |
| 1445641_at   | -0.045874915 | 7.099734102 | -0.424446038 | 0.680786158 | 0.680786158 | -5.545670061 |
| 1448961_at   | -0.031930643 | 3.1800368   | -0.424373154 | 0.680837466 | 0.680837466 | -5.545699347 |
| 1419953_at   | 0.038189878  | 3.48706071  | 0.424345659  | 0.680856822 | 0.680856822 | -5.545710393 |
| 1452515_a_at | 0.049264145  | 6.102353682 | 0.424324684  | 0.680871589 | 0.680871589 | -5.54571882  |
| 1439971_at   | -0.060407559 | 5.682628712 | -0.424225346 | 0.680941523 | 0.680941523 | -5.545758723 |
| 1449205_at   | -0.058215205 | 4.748632655 | -0.424128954 | 0.681009388 | 0.681009388 | -5.545797435 |
| 1452727_at   | -0.041681588 | 8.158090581 | -0.424108551 | 0.681023753 | 0.681023753 | -5.545805628 |
| 1440758_at   | -0.031724076 | 5.067768743 | -0.424085225 | 0.681040176 | 0.681040176 | -5.545814993 |
| 1423236_at   | -0.034348378 | 10.07814393 | -0.424044032 | 0.681069179 | 0.681069179 | -5.545831533 |
| 1417805_at   | -0.041933137 | 6.106528677 | -0.42387255  | 0.681189922 | 0.681189922 | -5.545900367 |
| 1451501_a_at | -0.044081997 | 8.554494592 | -0.423834927 | 0.681216414 | 0.681216414 | -5.545915465 |



|              |              |             |              |             |             |              |
|--------------|--------------|-------------|--------------|-------------|-------------|--------------|
| 1429196_at   | -0.075572631 | 5.027563457 | -0.423811378 | 0.681232997 | 0.681232997 | -5.545924915 |
| 1434064_at   | -0.030898828 | 7.409919427 | -0.423787823 | 0.681249583 | 0.681249583 | -5.545934367 |
| 1445025_at   | 0.058812831  | 3.973094956 | 0.423778631  | 0.681256056 | 0.681256056 | -5.545938055 |
| 1457813_at   | -0.029024404 | 4.8595983   | -0.423768323 | 0.681263314 | 0.681263314 | -5.54594219  |
| 1448438_at   | -0.029971607 | 8.532159323 | -0.423756037 | 0.681271966 | 0.681271966 | -5.54594712  |
| 1441238_at   | 0.05112608   | 7.416240481 | 0.423744015  | 0.681280432 | 0.681280432 | -5.545951944 |
| 1443355_at   | -0.043544469 | 7.252221395 | -0.423695158 | 0.681314836 | 0.681314836 | -5.545971544 |
| 1453700_s_at | 0.02957229   | 4.206130223 | 0.423687601  | 0.681320158 | 0.681320158 | -5.545974576 |
| 1459958_at   | -0.028280828 | 6.918601805 | -0.423663422 | 0.681337185 | 0.681337185 | -5.545984275 |
| 1451065_a_at | 0.072392532  | 8.871259314 | 0.423625714  | 0.68136374  | 0.68136374  | -5.545999401 |
| 1460276_a_at | -0.028397545 | 7.617935057 | -0.423610735 | 0.681374288 | 0.681374288 | -5.546005409 |
| 1417405_at   | 0.025446099  | 8.305938009 | 0.423550297  | 0.681416851 | 0.681416851 | -5.546029648 |
| 1421284_at   | -0.046508271 | 5.645657099 | -0.423538164 | 0.681425396 | 0.681425396 | -5.546034514 |
| 1431864_at   | 0.03459486   | 4.22589924  | 0.423478377  | 0.681467501 | 0.681467501 | -5.546058489 |
| 1441535_at   | -0.070719242 | 7.195832217 | -0.423416393 | 0.681511156 | 0.681511156 | -5.546083341 |
| 1418918_at   | -0.030401252 | 3.814704627 | -0.423353756 | 0.68155527  | 0.68155527  | -5.546108451 |
| 1421218_at   | 0.034650513  | 4.992843028 | 0.423328596  | 0.681572991 | 0.681572991 | -5.546118536 |
| 1438096_a_at | 0.045135405  | 10.41451982 | 0.423254963  | 0.681624853 | 0.681624853 | -5.546148048 |
| 1435310_at   | 0.035686072  | 4.63479081  | 0.42325486   | 0.681624926 | 0.681624926 | -5.546148089 |
| 1453166_at   | 0.040717552  | 8.277510744 | 0.423207639  | 0.681658186 | 0.681658186 | -5.546167013 |
| 1420881_at   | 0.054714053  | 5.93905022  | 0.423136718  | 0.68170814  | 0.68170814  | -5.546195431 |
| 1445395_at   | 0.035771883  | 6.2288392   | 0.423135593  | 0.681708932 | 0.681708932 | -5.546195881 |
| 1458627_at   | 0.08048379   | 5.34248874  | 0.423096274  | 0.681736628 | 0.681736628 | -5.546211634 |
| 1423447_at   | -0.031915967 | 8.91931204  | -0.423096043 | 0.681736791 | 0.681736791 | -5.546211727 |
| 1421616_at   | 0.02776526   | 3.599011473 | 0.423071686  | 0.681753948 | 0.681753948 | -5.546221484 |
| 1452836_at   | 0.030543045  | 8.819132684 | 0.423027349  | 0.681785179 | 0.681785179 | -5.546239245 |
| 1457266_at   | -0.040377476 | 8.30022845  | -0.422944578 | 0.681843486 | 0.681843486 | -5.546272397 |
| 1440942_at   | -0.038611227 | 5.689547146 | -0.422907482 | 0.681869618 | 0.681869618 | -5.546287252 |
| 1418442_at   | 0.028025269  | 11.22468765 | 0.422847883  | 0.681911603 | 0.681911603 | -5.546311117 |
| 1421254_a_at | -0.063664862 | 5.55618746  | -0.422836003 | 0.681919973 | 0.681919973 | -5.546315874 |
| 1439777_at   | -0.047587401 | 4.394910733 | -0.422827771 | 0.681925772 | 0.681925772 | -5.54631917  |
| 1416290_a_at | 0.068918216  | 10.52138188 | 0.422801895  | 0.681944001 | 0.681944001 | -5.54632953  |
| 1445170_at   | -0.035324716 | 4.238355366 | -0.422788451 | 0.681953473 | 0.681953473 | -5.546334912 |
| 1439462_x_at | -0.070889649 | 8.841212081 | -0.422770837 | 0.681965881 | 0.681965881 | -5.546341964 |
| 1447398_at   | -0.030120139 | 3.743260277 | -0.422758736 | 0.681974406 | 0.681974406 | -5.546346808 |
| 1440072_at   | -0.043089627 | 3.797401158 | -0.422748515 | 0.681981607 | 0.681981607 | -5.5463509   |
| 1448717_at   | -0.028297452 | 7.688927829 | -0.42274488  | 0.681984168 | 0.681984168 | -5.546352355 |
| 1441675_at   | 0.044907972  | 3.932432987 | 0.4227254    | 0.681997892 | 0.681997892 | -5.546360152 |
| 1446796_at   | -0.054699479 | 4.124848212 | -0.422580529 | 0.682099959 | 0.682099959 | -5.546418133 |
| 1452662_a_at | -0.032760716 | 10.64813789 | -0.42257189  | 0.682106046 | 0.682106046 | -5.54642159  |
| 1442492_at   | 0.035086353  | 5.279683416 | 0.422532441  | 0.68213384  | 0.68213384  | -5.546437375 |
| 1421562_at   | 0.043680788  | 4.156800177 | 0.422483488  | 0.682168331 | 0.682168331 | -5.54645696  |
| 1453384_at   | 0.04983149   | 6.063695129 | 0.422483336  | 0.682168439 | 0.682168439 | -5.546457021 |
| 1436735_at   | 0.057022606  | 6.893241063 | 0.422399965  | 0.682227182 | 0.682227182 | -5.546490372 |
| 1456410_at   | -0.031384876 | 7.318941754 | -0.422380487 | 0.682240907 | 0.682240907 | -5.546498163 |
| 1438727_at   | -0.032084234 | 7.453098998 | -0.422373846 | 0.682245586 | 0.682245586 | -5.546500819 |
| 1438711_at   | -0.033573796 | 4.630925513 | -0.422352079 | 0.682260924 | 0.682260924 | -5.546509525 |
| 1430942_at   | -0.029509243 | 6.978040318 | -0.422294034 | 0.682301825 | 0.682301825 | -5.546532738 |
| 1421941_at   | -0.04042417  | 4.157646334 | -0.422265895 | 0.682321654 | 0.682321654 | -5.546543991 |
| 1417966_at   | -0.040294101 | 9.110591728 | -0.422253792 | 0.682330182 | 0.682330182 | -5.54654883  |
| 1459850_x_at | 0.032207949  | 4.992312217 | 0.422250158  | 0.682332743 | 0.682332743 | -5.546550283 |
| 1431710_at   | -0.037294255 | 4.170708968 | -0.422249291 | 0.682333354 | 0.682333354 | -5.54655063  |
| 1439414_x_at | -0.032057441 | 3.901059568 | -0.42224664  | 0.682335222 | 0.682335222 | -5.54655169  |

|              |              |             |              |             |             |              |
|--------------|--------------|-------------|--------------|-------------|-------------|--------------|
| 1441454_at   | -0.034226228 | 6.434723548 | -0.422245168 | 0.682336259 | 0.682336259 | -5.546552279 |
| 1416721_s_at | 0.028032918  | 11.3896768  | 0.422036823  | 0.68248308  | 0.68248308  | -5.546635566 |
| 1436286_at   | -0.050732456 | 4.158720805 | -0.421991463 | 0.682515048 | 0.682515048 | -5.546653694 |
| 1456179_at   | 0.043776212  | 3.445969403 | 0.421986976  | 0.68251821  | 0.68251821  | -5.546655487 |
| 1452125_at   | 0.02977622   | 9.931342378 | 0.421981344  | 0.682522179 | 0.682522179 | -5.546657737 |
| 1458035_at   | -0.031018406 | 3.35689051  | -0.421975494 | 0.682526301 | 0.682526301 | -5.546660075 |
| 1450277_at   | 0.026448553  | 5.460999615 | 0.42191253   | 0.682570676 | 0.682570676 | -5.546685234 |
| 1421813_a_at | 0.033269516  | 10.8752942  | 0.421898054  | 0.682580879 | 0.682580879 | -5.546691018 |
| 1417432_a_at | -0.034914651 | 10.50575934 | -0.421885608 | 0.682589651 | 0.682589651 | -5.546695991 |
| 1417173_at   | -0.042491275 | 7.939700182 | -0.421881893 | 0.682592269 | 0.682592269 | -5.546697475 |
| 1459206_at   | -0.041986473 | 3.867805204 | -0.421850299 | 0.682614536 | 0.682614536 | -5.546710097 |
| 1446776_at   | 0.033846831  | 6.462803541 | 0.421846074  | 0.682617514 | 0.682617514 | -5.546711785 |
| 1444340_at   | 0.037991268  | 5.369393156 | 0.421772138  | 0.682669625 | 0.682669625 | -5.546741319 |
| 1454620_x_at | 0.029997474  | 13.71334033 | 0.421764617  | 0.682674926 | 0.682674926 | -5.546744323 |
| 1418906_at   | -0.038283135 | 6.835143275 | -0.421669322 | 0.682742093 | 0.682742093 | -5.546782381 |
| 1415714_a_at | -0.028122781 | 10.70474271 | -0.421660274 | 0.682748471 | 0.682748471 | -5.546785994 |
| 1456631_at   | 0.032289346  | 5.914380765 | 0.421624456  | 0.682773718 | 0.682773718 | -5.546800297 |
| 1459641_at   | 0.065977033  | 4.214028662 | 0.421616057  | 0.682779638 | 0.682779638 | -5.54680365  |
| 1416442_at   | 0.027536471  | 8.383540743 | 0.421614694  | 0.682780599 | 0.682780599 | -5.546804194 |
| 1429935_at   | -0.037357669 | 4.530316721 | -0.421544154 | 0.682830321 | 0.682830321 | -5.546832357 |
| 1440066_at   | -0.035076273 | 8.093980883 | -0.421508896 | 0.682855175 | 0.682855175 | -5.546846432 |
| 1457002_at   | 0.04963993   | 6.557594363 | 0.421497071  | 0.68286351  | 0.68286351  | -5.546851152 |
| 1457187_at   | -0.047306871 | 4.666419988 | -0.421489807 | 0.682868631 | 0.682868631 | -5.546854052 |
| 1430628_at   | -0.037054554 | 3.92966218  | -0.421420385 | 0.682917568 | 0.682917568 | -5.546881761 |
| 1432590_at   | -0.062169211 | 3.790606575 | -0.421413847 | 0.682922177 | 0.682922177 | -5.54688437  |
| 1458539_at   | -0.04379588  | 6.133641988 | -0.421412094 | 0.682923413 | 0.682923413 | -5.54688507  |
| 1440037_at   | 0.039197663  | 9.361276181 | 0.42140351   | 0.682929464 | 0.682929464 | -5.546888496 |
| 1452269_at   | -0.029182101 | 6.790992921 | -0.421402013 | 0.682930519 | 0.682930519 | -5.546889093 |
| 1456413_at   | -0.031157123 | 7.133673678 | -0.421392146 | 0.682937474 | 0.682937474 | -5.546893031 |
| 1440418_at   | -0.025844096 | 3.65947478  | -0.421305266 | 0.682998722 | 0.682998722 | -5.546927699 |
| 1428910_at   | -0.031678416 | 10.38315812 | -0.421296251 | 0.683005077 | 0.683005077 | -5.546931296 |
| 1437603_at   | 0.034319901  | 3.720741945 | 0.421259986  | 0.683030643 | 0.683030643 | -5.546945765 |
| 1435314_at   | -0.036612743 | 3.300271395 | -0.421225999 | 0.683054603 | 0.683054603 | -5.546959324 |
| 1449036_at   | -0.054661868 | 7.113750495 | -0.421162051 | 0.683099687 | 0.683099687 | -5.546984832 |
| 1428559_at   | 0.028710275  | 8.494195359 | 0.421151823  | 0.683106898 | 0.683106898 | -5.546988912 |
| 1427567_a_at | 0.026747041  | 9.794140644 | 0.421100187  | 0.683143303 | 0.683143303 | -5.547009506 |
| 1420291_at   | 0.027829779  | 3.132680107 | 0.421064976  | 0.683168128 | 0.683168128 | -5.547023548 |
| 1447286_at   | -0.042132563 | 3.520357158 | -0.421037743 | 0.683187329 | 0.683187329 | -5.547034408 |
| 1454826_at   | -0.037981722 | 8.671639664 | -0.421018342 | 0.683201008 | 0.683201008 | -5.547042144 |
| 1457095_at   | 0.033493055  | 5.025209252 | 0.421018264  | 0.683201063 | 0.683201063 | -5.547042175 |
| 1439312_at   | -0.040341529 | 4.052113168 | -0.421008373 | 0.683208037 | 0.683208037 | -5.547046119 |
| 1440652_at   | -0.034275627 | 5.046598915 | -0.421008025 | 0.683208282 | 0.683208282 | -5.547046258 |
| 1429136_at   | 0.052855671  | 7.016943934 | 0.420991535  | 0.683219909 | 0.683219909 | -5.547052833 |
| 1424834_s_at | -0.038290979 | 4.779328891 | -0.420944103 | 0.683253353 | 0.683253353 | -5.547071744 |
| 1419002_s_at | 0.033044557  | 3.3047786   | 0.420891001  | 0.683290794 | 0.683290794 | -5.547092912 |
| 1434652_at   | -0.04375632  | 8.573467257 | -0.420869871 | 0.683305693 | 0.683305693 | -5.547101335 |
| 1445368_at   | -0.036414606 | 3.185505358 | -0.420750621 | 0.68338978  | 0.68338978  | -5.547148862 |
| 1432763_at   | 0.050724242  | 3.757350929 | 0.420737146  | 0.683399282 | 0.683399282 | -5.547154232 |
| 1418849_x_at | -0.026460161 | 3.07144292  | -0.420696174 | 0.683428174 | 0.683428174 | -5.547170557 |
| 1426692_at   | -0.058836155 | 7.435191976 | -0.420682256 | 0.683437988 | 0.683437988 | -5.547176103 |
| 1432955_at   | -0.033974838 | 3.602824908 | -0.420644458 | 0.683464643 | 0.683464643 | -5.547191162 |
| 1442343_at   | 0.030258921  | 3.784505495 | 0.420589234  | 0.683503587 | 0.683503587 | -5.547213162 |
| 1447608_x_at | 0.03042549   | 6.73603448  | 0.420567863  | 0.683518658 | 0.683518658 | -5.547221675 |

|              |              |             |              |             |             |              |
|--------------|--------------|-------------|--------------|-------------|-------------|--------------|
| 1440845_at   | -0.056130473 | 3.92007355  | -0.420518223 | 0.683553664 | 0.683553664 | -5.547241447 |
| 1426404_a_at | 0.032906892  | 9.780987483 | 0.420493957  | 0.683570777 | 0.683570777 | -5.547251111 |
| 1430761_at   | 0.03333968   | 3.567313555 | 0.420427329  | 0.683617767 | 0.683617767 | -5.547277645 |
| 1436924_x_at | -0.025556188 | 13.78996672 | -0.420408806 | 0.68363083  | 0.68363083  | -5.547285021 |
| 1450687_at   | 0.064943155  | 6.559377521 | 0.420381309  | 0.683650223 | 0.683650223 | -5.547295969 |
| 1428312_at   | -0.033452914 | 6.534395517 | -0.420303906 | 0.683704814 | 0.683704814 | -5.547326785 |
| 1442392_at   | 0.045752679  | 3.946392827 | 0.420251042  | 0.683742099 | 0.683742099 | -5.547347829 |
| 1433594_at   | 0.032394565  | 8.056593286 | 0.420238232  | 0.683751134 | 0.683751134 | -5.547352928 |
| 1440915_at   | -0.044452256 | 6.501554189 | -0.420208341 | 0.683772217 | 0.683772217 | -5.547364825 |
| 1457604_x_at | -0.03366977  | 3.841339421 | -0.420207958 | 0.683772487 | 0.683772487 | -5.547364977 |
| 1423000_a_at | 0.047458732  | 5.197884877 | 0.420178619  | 0.683793181 | 0.683793181 | -5.547376654 |
| 1444853_at   | -0.030798032 | 3.074877988 | -0.420164842 | 0.683802898 | 0.683802898 | -5.547382136 |
| 1418028_at   | -0.03418491  | 4.681784547 | -0.420148874 | 0.683814161 | 0.683814161 | -5.547388491 |
| 1420218_at   | -0.041823367 | 4.683578198 | -0.420065242 | 0.683873151 | 0.683873151 | -5.547421769 |
| 1451337_at   | 0.026144042  | 8.489605393 | 0.420051648  | 0.68388274  | 0.68388274  | -5.547427178 |
| 1426706_s_at | -0.044158997 | 5.040158972 | -0.419951545 | 0.683953352 | 0.683953352 | -5.547467    |
| 1424461_at   | -0.037306134 | 9.955241481 | -0.419888035 | 0.683998154 | 0.683998154 | -5.547492261 |
| 1450582_at   | 0.046862778  | 3.813591379 | 0.419828131  | 0.684040412 | 0.684040412 | -5.547516084 |
| 1432605_at   | -0.0348626   | 3.34685793  | -0.419799684 | 0.68406048  | 0.68406048  | -5.547527396 |
| 1419539_at   | 0.02894739   | 4.079895241 | 0.419785393  | 0.684070561 | 0.684070561 | -5.547533078 |
| 1441582_at   | 0.030736784  | 3.796171615 | 0.419766212  | 0.684084093 | 0.684084093 | -5.547540705 |
| 1442622_at   | -0.033597748 | 6.762032313 | -0.419734555 | 0.684106426 | 0.684106426 | -5.547553291 |
| 1454176_at   | 0.028527893  | 3.632382383 | 0.419725371  | 0.684112905 | 0.684112905 | -5.547556942 |
| 1422902_s_at | 0.027878245  | 10.03058654 | 0.419722261  | 0.6841151   | 0.6841151   | -5.547558179 |
| 1437532_at   | -0.058153727 | 8.164702736 | -0.419673846 | 0.684149256 | 0.684149256 | -5.547577426 |
| 1425866_a_at | -0.032230322 | 6.592721094 | -0.419628625 | 0.68418116  | 0.68418116  | -5.547595401 |
| 1460271_at   | -0.029794748 | 5.10069476  | -0.419625643 | 0.684183263 | 0.684183263 | -5.547596586 |
| 1454982_at   | -0.029741493 | 8.427813515 | -0.419476902 | 0.684288206 | 0.684288206 | -5.547655697 |
| 1451103_at   | -0.028959834 | 8.221203059 | -0.419475041 | 0.684289519 | 0.684289519 | -5.547656436 |
| 1426055_a_at | -0.044435467 | 6.701721794 | -0.419448885 | 0.684307973 | 0.684307973 | -5.547666829 |
| 1432214_at   | 0.038715459  | 3.226572876 | 0.419443008  | 0.68431212  | 0.68431212  | -5.547669164 |
| 1423529_at   | 0.034478625  | 3.172336445 | 0.419439734  | 0.68431443  | 0.68431443  | -5.547670465 |
| 1451786_at   | -0.032631239 | 5.562956508 | -0.41942635  | 0.684323874 | 0.684323874 | -5.547675782 |
| 1417309_at   | 0.048085432  | 6.818995046 | 0.419394877  | 0.68434608  | 0.68434608  | -5.547688285 |
| 1436167_at   | -0.042767331 | 6.460443956 | -0.419382226 | 0.684355006 | 0.684355006 | -5.547693311 |
| 1422555_s_at | 0.031407518  | 9.1385412   | 0.419351618  | 0.684376603 | 0.684376603 | -5.54770547  |
| 1417291_at   | 0.031423378  | 9.697424191 | 0.419285956  | 0.684422935 | 0.684422935 | -5.54773155  |
| 1438976_x_at | 0.029403607  | 9.724517388 | 0.419280647  | 0.684426682 | 0.684426682 | -5.547733659 |
| 1445632_at   | 0.063393925  | 5.925924697 | 0.419267786  | 0.684435756 | 0.684435756 | -5.547738767 |
| 1420955_at   | -0.06828034  | 5.243257714 | -0.419246864 | 0.68445052  | 0.68445052  | -5.547747076 |
| 1454732_at   | -0.029130194 | 8.062215101 | -0.419196841 | 0.684485818 | 0.684485818 | -5.54776694  |
| 1425056_s_at | 0.029847835  | 5.357963261 | 0.41915472   | 0.684515541 | 0.684515541 | -5.547783665 |
| 1437703_at   | -0.025405389 | 6.71986736  | -0.419153815 | 0.68451618  | 0.68451618  | -5.547784024 |
| 1434586_a_at | -0.035905224 | 10.24796206 | -0.41914356  | 0.684523416 | 0.684523416 | -5.547788096 |
| 1445628_at   | -0.049173487 | 3.863689783 | -0.419130488 | 0.684532641 | 0.684532641 | -5.547793286 |
| 1433410_at   | -0.044937447 | 4.487637003 | -0.419030726 | 0.684603042 | 0.684603042 | -5.54783289  |
| 1460571_at   | 0.031898473  | 8.933285099 | 0.419006329  | 0.684620259 | 0.684620259 | -5.547842573 |
| 1453891_at   | 0.036871856  | 5.426923488 | 0.418905339  | 0.68469153  | 0.68469153  | -5.547882653 |
| 1440580_at   | -0.042774876 | 4.848160924 | -0.418891924 | 0.684700998 | 0.684700998 | -5.547887976 |
| 1443044_at   | -0.034518272 | 3.699583816 | -0.4187518   | 0.684799894 | 0.684799894 | -5.547943569 |
| 1456702_x_at | -0.034991295 | 9.872151586 | -0.41866008  | 0.68486463  | 0.68486463  | -5.547979949 |
| 1442031_at   | -0.036082077 | 5.009945163 | -0.418658155 | 0.684865989 | 0.684865989 | -5.547980712 |
| 1437702_at   | -0.036836931 | 4.872017005 | -0.418643075 | 0.684876633 | 0.684876633 | -5.547986693 |

|              |              |             |              |             |             |              |
|--------------|--------------|-------------|--------------|-------------|-------------|--------------|
| 1460573_at   | -0.026582666 | 9.680842316 | -0.41860383  | 0.684904333 | 0.684904333 | -5.548002256 |
| 1456741_s_at | 0.032880986  | 5.116126862 | 0.418578697  | 0.684922073 | 0.684922073 | -5.548012222 |
| 1452708_a_at | 0.038144465  | 8.290811707 | 0.418551518  | 0.684941258 | 0.684941258 | -5.548022999 |
| 1430362_at   | -0.042576107 | 5.304795333 | -0.418543812 | 0.684946697 | 0.684946697 | -5.548026055 |
| 1423262_a_at | 0.031298426  | 11.96216875 | 0.41849238   | 0.684983001 | 0.684983001 | -5.548046446 |
| 1458967_at   | -0.033158253 | 3.572105142 | -0.418373844 | 0.685066676 | 0.685066676 | -5.548093432 |
| 1444530_at   | -0.050790374 | 7.95842736  | -0.418369197 | 0.685069956 | 0.685069956 | -5.548095274 |
| 1439576_at   | 0.028251337  | 5.233406983 | 0.418317634  | 0.685106356 | 0.685106356 | -5.548115709 |
| 1451987_at   | 0.042459018  | 8.009774811 | 0.418264469  | 0.685143887 | 0.685143887 | -5.548136776 |
| 1454842_a_at | -0.063279984 | 7.357663679 | -0.418212414 | 0.685180636 | 0.685180636 | -5.548157401 |
| 1420469_at   | -0.027201478 | 3.85637709  | -0.418176219 | 0.685206188 | 0.685206188 | -5.548171741 |
| 1422604_at   | 0.035118485  | 4.890527228 | 0.41817604   | 0.685206315 | 0.685206315 | -5.548171812 |
| 1422369_at   | 0.038001804  | 4.471474359 | 0.418116158  | 0.68524859  | 0.68524859  | -5.548195532 |
| 1421486_at   | -0.043346857 | 6.699788594 | -0.417895619 | 0.685404298 | 0.685404298 | -5.548282867 |
| 1420404_at   | -0.04861141  | 4.762295061 | -0.417803726 | 0.685469183 | 0.685469183 | -5.548319244 |
| 1427680_a_at | 0.048636121  | 11.11465561 | 0.417772726  | 0.685491071 | 0.685491071 | -5.548331513 |
| 1450860_at   | 0.029476762  | 9.540705993 | 0.417764132  | 0.68549714  | 0.68549714  | -5.548334915 |
| 1429488_at   | -0.040809709 | 8.18967129  | -0.417702787 | 0.685540457 | 0.685540457 | -5.548359193 |
| 1433549_x_at | 0.03717677   | 11.75437273 | 0.417676666  | 0.685558902 | 0.685558902 | -5.548369529 |
| 1458458_at   | -0.046278938 | 3.529456719 | -0.417662571 | 0.685568855 | 0.685568855 | -5.548375106 |
| 1438359_at   | -0.03799047  | 3.435468578 | -0.41762561  | 0.685594955 | 0.685594955 | -5.548389731 |
| 1449247_at   | -0.026157649 | 3.512171243 | -0.417591228 | 0.685619234 | 0.685619234 | -5.548403334 |
| 1441745_at   | 0.038287629  | 3.220625529 | 0.417588867  | 0.685620901 | 0.685620901 | -5.548404268 |
| 1445608_at   | -0.038682055 | 3.213806025 | -0.417558829 | 0.685642114 | 0.685642114 | -5.548416152 |
| 1419518_at   | 0.050111313  | 4.959484552 | 0.417532698  | 0.685660567 | 0.685660567 | -5.548426489 |
| 1420213_x_at | 0.037547736  | 3.04769495  | 0.417529618  | 0.685662742 | 0.685662742 | -5.548427707 |
| 1446722_at   | -0.028161381 | 7.789703769 | -0.417511364 | 0.685675632 | 0.685675632 | -5.548434927 |
| 1427118_at   | -0.031600046 | 6.603221474 | -0.417495764 | 0.685686649 | 0.685686649 | -5.548441098 |
| 1438154_x_at | -0.034911549 | 8.149050152 | -0.417468134 | 0.685706161 | 0.685706161 | -5.548452026 |
| 1427696_at   | 0.040373231  | 4.646048073 | 0.417450967  | 0.685718285 | 0.685718285 | -5.548458816 |
| 1458224_at   | -0.040869902 | 4.864847673 | -0.417445874 | 0.685721881 | 0.685721881 | -5.54846083  |
| 1457985_at   | -0.032276281 | 6.980154822 | -0.417437027 | 0.68572813  | 0.68572813  | -5.548464329 |
| 1430658_a_at | 0.02857292   | 3.133867243 | 0.417384626  | 0.685765136 | 0.685765136 | -5.548485052 |
| 1443296_at   | 0.033863648  | 6.686380978 | 0.417378405  | 0.68576953  | 0.68576953  | -5.548487512 |
| 1422268_a_at | -0.035240725 | 7.475906463 | -0.417336557 | 0.685799085 | 0.685799085 | -5.548504059 |
| 1458972_at   | -0.037560227 | 4.636667966 | -0.41731336  | 0.685815467 | 0.685815467 | -5.548513231 |
| 1418003_at   | -0.030704241 | 7.408921252 | -0.417285566 | 0.685835097 | 0.685835097 | -5.548524219 |
| 1440930_a_at | 0.043506249  | 5.88804816  | 0.417228778  | 0.685875205 | 0.685875205 | -5.548546669 |
| 1457396_at   | 0.031115127  | 4.008446395 | 0.417228723  | 0.685875244 | 0.685875244 | -5.548546691 |
| 1457272_at   | 0.034780721  | 8.288361531 | 0.41720215   | 0.685894012 | 0.685894012 | -5.548557195 |
| 1415880_a_at | -0.025868669 | 11.03306345 | -0.417191406 | 0.6859016   | 0.6859016   | -5.548561441 |
| 1430423_s_at | -0.037427572 | 8.096520612 | -0.417137465 | 0.685939699 | 0.685939699 | -5.548582761 |
| 1437851_x_at | -0.027225501 | 10.98163808 | -0.416986782 | 0.686046131 | 0.686046131 | -5.548642303 |
| 1417308_at   | -0.033112577 | 11.74285845 | -0.416977118 | 0.686052958 | 0.686052958 | -5.548646121 |
| 1432957_at   | 0.031533866  | 3.30215452  | 0.416911609  | 0.686099232 | 0.686099232 | -5.548671999 |
| 1451304_at   | -0.041056683 | 5.03835134  | -0.416863538 | 0.686133189 | 0.686133189 | -5.548690987 |
| 1418422_at   | 0.027038104  | 3.128215396 | 0.416860489  | 0.686135342 | 0.686135342 | -5.548692191 |
| 1445135_at   | 0.034792597  | 5.03797737  | 0.416767218  | 0.68620123  | 0.68620123  | -5.548729025 |
| 1451046_at   | -0.039080762 | 6.024517726 | -0.416761218 | 0.686205469 | 0.686205469 | -5.548731395 |
| 1442164_at   | 0.044995235  | 4.188150127 | 0.416737444  | 0.686222264 | 0.686222264 | -5.548740782 |
| 1431200_a_at | 0.040543283  | 5.341669405 | 0.416726628  | 0.686229905 | 0.686229905 | -5.548745053 |
| 1433537_at   | 0.032647413  | 10.48658884 | 0.416713031  | 0.68623951  | 0.68623951  | -5.548750422 |
| 1421195_at   | 0.044428834  | 3.652143515 | 0.416704458  | 0.686245567 | 0.686245567 | -5.548753806 |

|              |              |             |              |             |             |              |
|--------------|--------------|-------------|--------------|-------------|-------------|--------------|
| 1420805_at   | 0.02843729   | 4.933608754 | 0.416696709  | 0.686251041 | 0.686251041 | -5.548756866 |
| 1423315_at   | 0.039112255  | 5.884246092 | 0.416515464  | 0.686379087 | 0.686379087 | -5.548828409 |
| 1449506_a_at | -0.028532287 | 11.4179878  | -0.416459558 | 0.686418586 | 0.686418586 | -5.548850471 |
| 1451362_at   | 0.035843334  | 7.924486635 | 0.416420684  | 0.686446052 | 0.686446052 | -5.54886581  |
| 1422401_at   | -0.058891447 | 5.083715234 | -0.416406771 | 0.686455882 | 0.686455882 | -5.548871299 |
| 1423841_at   | -0.050785578 | 7.867310783 | -0.416405471 | 0.6864568   | 0.6864568   | -5.548871812 |
| 1435189_at   | -0.02692233  | 5.802565022 | -0.416391316 | 0.686466801 | 0.686466801 | -5.548877397 |
| 1425378_at   | -0.045655198 | 4.959683654 | -0.4163862   | 0.686470416 | 0.686470416 | -5.548879415 |
| 1425886_at   | -0.057399787 | 4.588959173 | -0.416288654 | 0.686539339 | 0.686539339 | -5.548917896 |
| 1454628_at   | -0.086872884 | 7.229873618 | -0.416280057 | 0.686545413 | 0.686545413 | -5.548921287 |
| 1444582_at   | 0.048718254  | 3.284706013 | 0.416278901  | 0.68654623  | 0.68654623  | -5.548921743 |
| 1454867_at   | 0.045114371  | 10.11475393 | 0.416266604  | 0.686554919 | 0.686554919 | -5.548926593 |
| 1430359_a_at | 0.046778132  | 6.232617754 | 0.416233911  | 0.68657802  | 0.68657802  | -5.548939487 |
| 1434601_at   | 0.02894869   | 4.794588408 | 0.41621853   | 0.686588888 | 0.686588888 | -5.548945554 |
| 1424913_at   | 0.051031952  | 5.171956847 | 0.416092406  | 0.68667801  | 0.68667801  | -5.548995287 |
| 1415902_at   | -0.032682876 | 3.838751038 | -0.416000507 | 0.686742952 | 0.686742952 | -5.549031516 |
| 1450484_a_at | -0.049555535 | 5.75473178  | -0.415922572 | 0.686798027 | 0.686798027 | -5.549062233 |
| 1447569_at   | 0.041554526  | 5.729001173 | 0.41591195   | 0.686805534 | 0.686805534 | -5.549066419 |
| 1431697_at   | -0.042322327 | 5.010630442 | -0.415883079 | 0.686825937 | 0.686825937 | -5.549077797 |
| 1431104_at   | 0.028790564  | 4.203144772 | 0.415840397  | 0.686856102 | 0.686856102 | -5.549094616 |
| 1428094_at   | -0.026615101 | 10.97111569 | -0.415777417 | 0.686900612 | 0.686900612 | -5.549119431 |
| 1423637_at   | -0.026868586 | 6.837503699 | -0.415711981 | 0.686946859 | 0.686946859 | -5.549145209 |
| 1437095_at   | -0.072012826 | 5.962762175 | -0.415659522 | 0.686983936 | 0.686983936 | -5.549165872 |
| 1446841_at   | -0.04778442  | 6.670415351 | -0.415636824 | 0.686999978 | 0.686999978 | -5.549174812 |
| 1418192_at   | 0.027459209  | 8.667323464 | 0.415630395  | 0.687004522 | 0.687004522 | -5.549177344 |
| 1455903_at   | 0.035505211  | 7.136545579 | 0.415571647  | 0.687046045 | 0.687046045 | -5.54920048  |
| 1420515_a_at | 0.037252795  | 3.674811128 | 0.415566374  | 0.687049772 | 0.687049772 | -5.549202557 |
| 1442587_at   | -0.042652304 | 3.661033893 | -0.415557531 | 0.687056023 | 0.687056023 | -5.549206039 |
| 1448256_at   | -0.038509667 | 6.156972295 | -0.415538775 | 0.68706928  | 0.68706928  | -5.549213425 |
| 1439043_at   | -0.065262386 | 4.280993313 | -0.415499855 | 0.68709679  | 0.68709679  | -5.549228749 |
| 1420139_s_at | 0.035202854  | 9.329564922 | 0.415479299  | 0.68711132  | 0.68711132  | -5.549236842 |
| 1455874_at   | -0.042771913 | 6.333500916 | -0.415463662 | 0.687122372 | 0.687122372 | -5.549242998 |
| 1455624_at   | -0.031488649 | 6.192638048 | -0.415452638 | 0.687130164 | 0.687130164 | -5.549247338 |
| 1420096_at   | 0.048224566  | 5.172335888 | 0.415426023  | 0.687148978 | 0.687148978 | -5.549257816 |
| 1460362_at   | 0.028067968  | 8.208321926 | 0.41540593   | 0.687163181 | 0.687163181 | -5.549265726 |
| 1429524_at   | 0.047869554  | 3.91859016  | 0.41532085   | 0.687223322 | 0.687223322 | -5.549299213 |
| 1434630_at   | 0.025210912  | 8.189542008 | 0.415202163  | 0.687307223 | 0.687307223 | -5.549345918 |
| 1416424_at   | 0.027731154  | 8.468158298 | 0.415113988  | 0.687369558 | 0.687369558 | -5.549380607 |
| 1449543_at   | -0.034453474 | 4.322648913 | -0.415109301 | 0.687372871 | 0.687372871 | -5.549382451 |
| 1424451_at   | 0.084927739  | 5.923859171 | 0.41508625   | 0.687389167 | 0.687389167 | -5.549391518 |
| 1429104_at   | 0.030219909  | 9.329978434 | 0.415075757  | 0.687396586 | 0.687396586 | -5.549395646 |
| 1428338_at   | -0.036177023 | 5.271018284 | -0.414957691 | 0.687480057 | 0.687480057 | -5.549442079 |
| 1426513_at   | -0.042740409 | 7.256872062 | -0.414942762 | 0.687490612 | 0.687490612 | -5.54944795  |
| 1452367_at   | 0.038828747  | 5.072324165 | 0.41487306   | 0.687539893 | 0.687539893 | -5.549475356 |
| 1435452_at   | -0.035102461 | 6.295628909 | -0.414774024 | 0.687609916 | 0.687609916 | -5.549514288 |
| 1449437_at   | -0.033846973 | 7.775158031 | -0.414735899 | 0.687636873 | 0.687636873 | -5.549529273 |
| 1440986_at   | 0.045880146  | 5.830502051 | 0.414697078  | 0.687664323 | 0.687664323 | -5.54954453  |
| 1452642_at   | 0.038075364  | 4.136346701 | 0.41469481   | 0.687665926 | 0.687665926 | -5.549545421 |
| 1425303_at   | 0.048993296  | 4.527133944 | 0.414630642  | 0.6877113   | 0.6877113   | -5.549570637 |
| 1422291_at   | -0.02759006  | 3.761679866 | -0.414612996 | 0.687723778 | 0.687723778 | -5.549577571 |
| 1442297_at   | 0.032715898  | 6.716228877 | 0.414597534  | 0.687734711 | 0.687734711 | -5.549583646 |
| 1449252_at   | 0.043684848  | 3.874559271 | 0.414578231  | 0.687748361 | 0.687748361 | -5.54959123  |
| 1439469_at   | -0.033158596 | 4.029170007 | -0.414530315 | 0.687782244 | 0.687782244 | -5.549610054 |

|              |              |             |              |             |             |              |
|--------------|--------------|-------------|--------------|-------------|-------------|--------------|
| 1415888_at   | 0.046323527  | 10.13493933 | 0.414475911  | 0.687820716 | 0.687820716 | -5.549631425 |
| 1421927_at   | -0.03128922  | 5.536622447 | -0.414431559 | 0.687852081 | 0.687852081 | -5.549648846 |
| 1423910_at   | -0.044023227 | 7.680907823 | -0.414413536 | 0.687864825 | 0.687864825 | -5.549655924 |
| 1417895_a_at | 0.031504694  | 5.463649641 | 0.414392423  | 0.687879757 | 0.687879757 | -5.549664216 |
| 1436192_at   | -0.035970106 | 6.99634695  | -0.41438035  | 0.687888294 | 0.687888294 | -5.549668957 |
| 1451967_x_at | -0.06301492  | 10.89927179 | -0.414328436 | 0.687925008 | 0.687925008 | -5.549689343 |
| 1415935_at   | -0.060559633 | 10.25238805 | -0.414325913 | 0.687926793 | 0.687926793 | -5.549690334 |
| 1429505_at   | 0.048906801  | 8.779958291 | 0.414321315  | 0.687930044 | 0.687930044 | -5.549692139 |
| 1452051_at   | 0.026777433  | 10.80687733 | 0.414311832  | 0.687936751 | 0.687936751 | -5.549695863 |
| 1421574_at   | 0.038899945  | 4.509377837 | 0.414283478  | 0.687956803 | 0.687956803 | -5.549706995 |
| 1442961_at   | 0.041218771  | 4.647880339 | 0.414259287  | 0.687973911 | 0.687973911 | -5.549716493 |
| 1420104_at   | -0.044688501 | 5.862936775 | -0.414255653 | 0.687976481 | 0.687976481 | -5.54971792  |
| 1441574_at   | 0.032428066  | 6.063726439 | 0.414187566  | 0.688024636 | 0.688024636 | -5.549744648 |
| 1416574_at   | 0.038285676  | 8.220052287 | 0.414147931  | 0.688052668 | 0.688052668 | -5.549760206 |
| 1426424_at   | 0.026986639  | 7.78863986  | 0.414105855  | 0.688082426 | 0.688082426 | -5.549776719 |
| 1460736_at   | -0.026168777 | 8.009572718 | -0.41406816  | 0.688109088 | 0.688109088 | -5.549791512 |
| 1452851_at   | -0.037599723 | 6.587802003 | -0.414015081 | 0.688146631 | 0.688146631 | -5.549812341 |
| 1459541_at   | -0.032473276 | 3.134043444 | -0.413961913 | 0.688184237 | 0.688184237 | -5.549833201 |
| 1432845_at   | -0.038978519 | 5.309682043 | -0.413957961 | 0.688187032 | 0.688187032 | -5.549834751 |
| 1444714_at   | 0.029423181  | 5.041090161 | 0.413936855  | 0.688201961 | 0.688201961 | -5.549843032 |
| 1437921_x_at | -0.028544422 | 8.062974252 | -0.41393222  | 0.68820524  | 0.68820524  | -5.54984485  |
| 1440375_at   | 0.045252133  | 7.160805078 | 0.413925334  | 0.688210111 | 0.688210111 | -5.549847551 |
| 1436657_at   | -0.038175819 | 4.95626017  | -0.41386018  | 0.688256197 | 0.688256197 | -5.549873109 |
| 1448922_at   | 0.029016781  | 7.482041032 | 0.413847244  | 0.688265347 | 0.688265347 | -5.549878183 |
| 1427871_at   | -0.036939468 | 3.489742626 | -0.413842664 | 0.688268587 | 0.688268587 | -5.549879979 |
| 1421704_a_at | -0.035175797 | 3.698043681 | -0.413768276 | 0.688321208 | 0.688321208 | -5.549909153 |
| 1443667_at   | 0.043717994  | 3.829633652 | 0.413711102  | 0.688361652 | 0.688361652 | -5.549931572 |
| 1457043_at   | -0.035250461 | 9.018052168 | -0.413704371 | 0.688366414 | 0.688366414 | -5.549934212 |
| 1447471_at   | 0.055548455  | 7.668256746 | 0.413678726  | 0.688384555 | 0.688384555 | -5.549944267 |
| 1423553_at   | 0.034263659  | 4.861213353 | 0.413666615  | 0.688393123 | 0.688393123 | -5.549949015 |
| 1436535_at   | -0.046112596 | 8.191552932 | -0.413642605 | 0.688410108 | 0.688410108 | -5.549958428 |
| 1430556_at   | 0.03564419   | 4.877375687 | 0.413532507  | 0.688487996 | 0.688487996 | -5.550001585 |
| 1455944_at   | 0.028130218  | 7.30573586  | 0.413532316  | 0.688488131 | 0.688488131 | -5.55000166  |
| 1416012_at   | 0.06534559   | 6.21419809  | 0.41348378   | 0.688522469 | 0.688522469 | -5.550020682 |
| 1426791_at   | -0.04436292  | 6.795678852 | -0.413462846 | 0.688537279 | 0.688537279 | -5.550028886 |
| 1452876_x_at | 0.052186602  | 5.617437522 | 0.413435639  | 0.688556528 | 0.688556528 | -5.550039547 |
| 1451151_s_at | 0.025578225  | 9.171286121 | 0.413376295  | 0.688598513 | 0.688598513 | -5.550062799 |
| 1447061_at   | 0.051002255  | 5.896285038 | 0.413368206  | 0.688604237 | 0.688604237 | -5.550065968 |
| 1440200_at   | -0.039116067 | 4.496607083 | -0.413332839 | 0.68862926  | 0.68862926  | -5.550079824 |
| 1422484_at   | 0.048084637  | 9.626507442 | 0.413262642  | 0.688678927 | 0.688678927 | -5.550107322 |
| 1423740_a_at | 0.045749861  | 10.61890199 | 0.413249398  | 0.688688297 | 0.688688297 | -5.550112509 |
| 1432114_at   | 0.028200546  | 3.51525071  | 0.413243729  | 0.688692308 | 0.688692308 | -5.55011473  |
| 1420223_at   | 0.030507917  | 3.998504419 | 0.41323227   | 0.688700416 | 0.688700416 | -5.550119218 |
| 1444940_at   | 0.046562426  | 4.444402537 | 0.413196196  | 0.688725941 | 0.688725941 | -5.550133346 |
| 1448970_at   | -0.024370363 | 9.076449183 | -0.41319386  | 0.688727594 | 0.688727594 | -5.550134261 |
| 1422123_s_at | -0.073480885 | 6.429532026 | -0.413163715 | 0.688748924 | 0.688748924 | -5.550146066 |
| 1432995_at   | -0.032850218 | 5.370901845 | -0.413146824 | 0.688760875 | 0.688760875 | -5.550152681 |
| 1444487_at   | 0.036254608  | 3.434000616 | 0.413122467  | 0.68877811  | 0.68877811  | -5.550162218 |
| 1429982_at   | 0.049717665  | 7.770642366 | 0.413106518  | 0.688789395 | 0.688789395 | -5.550168463 |
| 1453722_s_at | 0.033437956  | 11.50786456 | 0.413095526  | 0.688797174 | 0.688797174 | -5.550172767 |
| 1416267_at   | 0.040980061  | 8.855065964 | 0.413061571  | 0.6888212   | 0.6888212   | -5.550186061 |
| 1442126_at   | -0.028234386 | 6.703276945 | -0.413016155 | 0.688853337 | 0.688853337 | -5.550203841 |
| 1440324_at   | 0.042404225  | 6.799616767 | 0.41297906   | 0.688879587 | 0.688879587 | -5.550218362 |

|              |              |             |              |             |             |              |
|--------------|--------------|-------------|--------------|-------------|-------------|--------------|
| 1424432_at   | 0.041032502  | 8.06987608  | 0.412967236  | 0.688887954 | 0.688887954 | -5.55022299  |
| 1427253_s_at | 0.042262698  | 9.294770834 | 0.412914822  | 0.688925044 | 0.688925044 | -5.550243505 |
| 1447681_x_at | -0.030860633 | 5.85185504  | -0.412896348 | 0.688938118 | 0.688938118 | -5.550250735 |
| 1436908_at   | 0.035320185  | 8.904322993 | 0.412860631  | 0.688963394 | 0.688963394 | -5.550264713 |
| 1455132_at   | 0.039007238  | 4.030518389 | 0.412783776  | 0.689017783 | 0.689017783 | -5.550294785 |
| 1416001_a_at | -0.037873409 | 9.334431823 | -0.412783218 | 0.689018178 | 0.689018178 | -5.550295003 |
| 1422277_at   | 0.032346158  | 3.603327076 | 0.412755369  | 0.689037887 | 0.689037887 | -5.550305899 |
| 1436373_at   | -0.032361275 | 7.506411407 | -0.412747142 | 0.689043709 | 0.689043709 | -5.550309118 |
| 1418376_at   | -0.033436619 | 4.149094144 | -0.412738235 | 0.689050013 | 0.689050013 | -5.550312603 |
| 1436391_s_at | -0.027491758 | 8.034982446 | -0.412729893 | 0.689055916 | 0.689055916 | -5.550315866 |
| 1424958_at   | 0.029856003  | 3.736935422 | 0.412698088  | 0.689078426 | 0.689078426 | -5.550328308 |
| 1456253_s_at | 0.036549739  | 8.500985974 | 0.412661291  | 0.689104468 | 0.689104468 | -5.550342701 |
| 1417395_at   | -0.041756898 | 9.761996801 | -0.412636901 | 0.68912173  | 0.68912173  | -5.550352241 |
| 1440233_at   | -0.026794068 | 3.923371077 | -0.412629547 | 0.689126935 | 0.689126935 | -5.550355117 |
| 1444369_at   | -0.035994803 | 3.952106007 | -0.412583979 | 0.689159185 | 0.689159185 | -5.550372939 |
| 1442105_at   | 0.035862762  | 4.231230091 | 0.412581032  | 0.689161271 | 0.689161271 | -5.550374091 |
| 1417200_at   | -0.028081492 | 9.095887753 | -0.412529891 | 0.689197467 | 0.689197467 | -5.55039409  |
| 1420019_at   | -0.03412092  | 4.386422859 | -0.412502831 | 0.68921662  | 0.68921662  | -5.550404671 |
| 1457649_x_at | 0.053206455  | 6.052979329 | 0.412473466  | 0.689237405 | 0.689237405 | -5.550416152 |
| 1429298_at   | 0.040670055  | 9.229063882 | 0.412458499  | 0.689247998 | 0.689247998 | -5.550422004 |
| 1441882_at   | -0.030782426 | 3.65977514  | -0.412419643 | 0.6892755   | 0.6892755   | -5.550437194 |
| 1424017_a_at | 0.039513042  | 12.02990318 | 0.412382598  | 0.689301722 | 0.689301722 | -5.550451675 |
| 1424637_s_at | -0.032655816 | 10.23821519 | -0.412364913 | 0.68931424  | 0.68931424  | -5.550458588 |
| 1423277_at   | -0.036476775 | 8.037433101 | -0.412356654 | 0.689320086 | 0.689320086 | -5.550461816 |
| 1454552_at   | 0.030325694  | 4.228735155 | 0.412336478  | 0.689334367 | 0.689334367 | -5.550469702 |
| 1458265_at   | -0.029239449 | 3.187576204 | -0.412327018 | 0.689341063 | 0.689341063 | -5.550473399 |
| 1434709_at   | -0.057802356 | 5.190926799 | -0.412314905 | 0.689349637 | 0.689349637 | -5.550478134 |
| 1435449_at   | 0.038493513  | 6.737832573 | 0.412312317  | 0.689351469 | 0.689351469 | -5.550479145 |
| 1441807_s_at | 0.043957992  | 5.190127591 | 0.412279948  | 0.689374382 | 0.689374382 | -5.550491795 |
| 1428990_at   | -0.030238263 | 5.232422368 | -0.412231973 | 0.689408342 | 0.689408342 | -5.550510543 |
| 1423585_at   | 0.029470968  | 4.236824401 | 0.412229345  | 0.689410202 | 0.689410202 | -5.55051157  |
| 1449376_at   | 0.037213014  | 8.660087438 | 0.412177803  | 0.689446687 | 0.689446687 | -5.550531708 |
| 1447100_s_at | -0.091507667 | 5.99272898  | -0.41216446  | 0.689456133 | 0.689456133 | -5.550536922 |
| 1449004_at   | -0.037170493 | 8.508865314 | -0.41216166  | 0.689458115 | 0.689458115 | -5.550538015 |
| 1439464_s_at | 0.045753097  | 10.46844661 | 0.412112544  | 0.689492884 | 0.689492884 | -5.550557203 |
| 1423810_at   | -0.029878957 | 8.96669982  | -0.412111656 | 0.689493513 | 0.689493513 | -5.55055755  |
| 1420853_at   | -0.028431334 | 7.471867311 | -0.412050543 | 0.689536777 | 0.689536777 | -5.550581422 |
| 1440645_at   | 0.045984915  | 3.376661892 | 0.412043031  | 0.689542095 | 0.689542095 | -5.550584356 |
| 1441682_s_at | -0.030199519 | 10.05308928 | -0.412035047 | 0.689547747 | 0.689547747 | -5.550587475 |
| 1415760_s_at | -0.031551906 | 10.02293361 | -0.41198898  | 0.689580359 | 0.689580359 | -5.550605466 |
| 1440843_at   | -0.042056241 | 4.407034515 | -0.411936219 | 0.689617712 | 0.689617712 | -5.55062607  |
| 1442739_at   | 0.047663742  | 4.146686873 | 0.411928218  | 0.689623377 | 0.689623377 | -5.550629194 |
| 1447389_at   | -0.034235862 | 3.913373879 | -0.411891173 | 0.689649604 | 0.689649604 | -5.550643659 |
| 1453213_at   | -0.032356779 | 3.212171267 | -0.411849697 | 0.689678968 | 0.689678968 | -5.550659852 |
| 1443665_at   | -0.046763344 | 4.733061395 | -0.411842039 | 0.68968439  | 0.68968439  | -5.550662842 |
| 1427453_at   | 0.040985612  | 3.366051398 | 0.411801218  | 0.689713292 | 0.689713292 | -5.550678778 |
| 1435620_at   | 0.027846399  | 8.079131901 | 0.411800593  | 0.689713734 | 0.689713734 | -5.550679021 |
| 1460476_s_at | 0.048995867  | 6.402214511 | 0.411757303  | 0.689744384 | 0.689744384 | -5.550695919 |
| 1422572_at   | -0.039149425 | 8.011719766 | -0.411614273 | 0.689845656 | 0.689845656 | -5.550751738 |
| 1432485_at   | 0.034057736  | 3.608916446 | 0.411564872  | 0.689880635 | 0.689880635 | -5.550771012 |
| 1426693_x_at | -0.049290359 | 7.898678084 | -0.411532504 | 0.689903555 | 0.689903555 | -5.55078364  |
| 1443449_at   | -0.030779834 | 3.498272103 | -0.411528043 | 0.689906714 | 0.689906714 | -5.55078538  |
| 1450073_at   | 0.046551414  | 6.698619565 | 0.411463562  | 0.689952373 | 0.689952373 | -5.550810533 |

|              |              |             |              |             |             |              |
|--------------|--------------|-------------|--------------|-------------|-------------|--------------|
| 1423772_x_at | -0.03052296  | 12.14141743 | -0.411385542 | 0.690007622 | 0.690007622 | -5.550840963 |
| 1435741_at   | 0.028346878  | 5.724787134 | 0.411380867  | 0.690010932 | 0.690010932 | -5.550842786 |
| 1419798_at   | -0.036208394 | 6.38618535  | -0.411371866 | 0.690017306 | 0.690017306 | -5.550846296 |
| 1435413_x_at | 0.040693194  | 10.92278254 | 0.411343687  | 0.690037261 | 0.690037261 | -5.550857284 |
| 1454820_at   | 0.027862136  | 7.393308652 | 0.411330468  | 0.690046623 | 0.690046623 | -5.550862439 |
| 1452834_at   | -0.028770941 | 8.024251646 | -0.411229319 | 0.690118254 | 0.690118254 | -5.550901876 |
| 1439973_at   | -0.050665725 | 4.147886158 | -0.411167724 | 0.690161875 | 0.690161875 | -5.550925886 |
| 1436812_at   | -0.036217047 | 8.430780602 | -0.411149628 | 0.690174691 | 0.690174691 | -5.55093294  |
| 1433599_at   | -0.029723784 | 8.579274838 | -0.411142675 | 0.690179615 | 0.690179615 | -5.55093565  |
| 1418108_at   | 0.044549093  | 4.224223076 | 0.411091733  | 0.690215694 | 0.690215694 | -5.550955504 |
| 1417032_at   | 0.027109744  | 9.100813616 | 0.411048305  | 0.690246451 | 0.690246451 | -5.550972428 |
| 1458510_at   | -0.058143028 | 8.09549182  | -0.411004612 | 0.690277397 | 0.690277397 | -5.550989453 |
| 1437530_at   | -0.028611744 | 3.11659007  | -0.410969299 | 0.690302408 | 0.690302408 | -5.551003211 |
| 1447513_at   | 0.034210187  | 3.383172547 | 0.410959412  | 0.690309411 | 0.690309411 | -5.551007064 |
| 1450496_a_at | 0.034451629  | 7.766634522 | 0.410955094  | 0.690312469 | 0.690312469 | -5.551008746 |
| 1444576_at   | 0.03856729   | 5.371150036 | 0.410952286  | 0.690314458 | 0.690314458 | -5.55100984  |
| 1460177_at   | -0.033345151 | 8.449626021 | -0.410925849 | 0.690333183 | 0.690333183 | -5.551020139 |
| 1416705_at   | 0.036850432  | 8.053202258 | 0.410876855  | 0.690367885 | 0.690367885 | -5.551039224 |
| 1416047_at   | -0.045192126 | 3.646431271 | -0.410840601 | 0.690393564 | 0.690393564 | -5.551053345 |
| 1447359_at   | -0.029994706 | 6.904292642 | -0.410801153 | 0.690421506 | 0.690421506 | -5.551068709 |
| 1422102_a_at | -0.049453905 | 6.884598165 | -0.410760304 | 0.690450441 | 0.690450441 | -5.551084617 |
| 1459873_x_at | -0.044778554 | 3.574792742 | -0.41066388  | 0.690518743 | 0.690518743 | -5.551122162 |
| 1440022_at   | 0.030667202  | 6.982037961 | 0.410658157  | 0.690522798 | 0.690522798 | -5.55112439  |
| 1454975_at   | -0.027984707 | 9.418208992 | -0.410609071 | 0.690557569 | 0.690557569 | -5.551143499 |
| 1455725_a_at | 0.029862111  | 13.11135747 | 0.410541457  | 0.690605467 | 0.690605467 | -5.551169818 |
| 1433656_a_at | -0.029538085 | 9.987412167 | -0.410468496 | 0.690657154 | 0.690657154 | -5.551198213 |
| 1450393_a_at | -0.028751806 | 8.227894715 | -0.410445109 | 0.690673722 | 0.690673722 | -5.551207313 |
| 1457901_at   | -0.047127205 | 7.303085886 | -0.41042059  | 0.690691092 | 0.690691092 | -5.551216854 |
| 1442577_at   | -0.038726288 | 4.324731496 | -0.410416955 | 0.690693667 | 0.690693667 | -5.551218268 |
| 1427989_at   | -0.033629624 | 4.779215505 | -0.410399727 | 0.690705872 | 0.690705872 | -5.551224972 |
| 1460471_at   | 0.047499036  | 6.939942103 | 0.410318932  | 0.690763113 | 0.690763113 | -5.551256405 |
| 1424056_at   | -0.030217868 | 9.247470514 | -0.410299309 | 0.690777015 | 0.690777015 | -5.551264038 |
| 1449070_x_at | 0.051974144  | 10.06058484 | 0.410281859  | 0.690789379 | 0.690789379 | -5.551270826 |
| 1447120_at   | -0.050295415 | 5.410153493 | -0.410255499 | 0.690808055 | 0.690808055 | -5.551281079 |
| 1416189_a_at | -0.040935041 | 11.8381095  | -0.410190455 | 0.690854139 | 0.690854139 | -5.551306377 |
| 1419050_at   | -0.133988913 | 6.430112469 | -0.410155369 | 0.690878998 | 0.690878998 | -5.551320021 |
| 1440331_at   | -0.028079789 | 6.942242517 | -0.410148773 | 0.690883671 | 0.690883671 | -5.551322586 |
| 1446434_at   | -0.033790648 | 6.964339325 | -0.410118874 | 0.690904856 | 0.690904856 | -5.551334212 |
| 1428041_at   | 0.02638101   | 3.334356419 | 0.410107942  | 0.690912602 | 0.690912602 | -5.551338463 |
| 1460553_at   | -0.046451865 | 6.413550752 | -0.410099722 | 0.690918426 | 0.690918426 | -5.551341658 |
| 1434237_at   | 0.038397691  | 4.394013716 | 0.410083789  | 0.690929716 | 0.690929716 | -5.551347853 |
| 1417252_at   | 0.031180503  | 8.181746081 | 0.410066226  | 0.69094216  | 0.69094216  | -5.551354682 |
| 1428480_at   | -0.026763438 | 8.371527149 | -0.41000806  | 0.690983375 | 0.690983375 | -5.551377294 |
| 1422581_at   | 0.024984232  | 8.95457219  | 0.409985267  | 0.690999526 | 0.690999526 | -5.551386154 |
| 1421419_at   | -0.03369966  | 4.149454039 | -0.409960379 | 0.691017161 | 0.691017161 | -5.551395828 |
| 1452206_at   | -0.024814441 | 10.58693876 | -0.409924099 | 0.691042869 | 0.691042869 | -5.551409929 |
| 1447552_s_at | -0.03727719  | 3.627885661 | -0.409914582 | 0.691049612 | 0.691049612 | -5.551413628 |
| 1434689_at   | 0.029786402  | 9.021238165 | 0.409869667  | 0.69108144  | 0.69108144  | -5.551431083 |
| 1444635_at   | -0.040334109 | 3.91769546  | -0.40978225  | 0.691143387 | 0.691143387 | -5.55146505  |
| 1432687_at   | 0.037684623  | 4.323538847 | 0.409769035  | 0.691152752 | 0.691152752 | -5.551470184 |
| 1460739_at   | -0.043191284 | 7.441796408 | -0.409733095 | 0.691178221 | 0.691178221 | -5.551484147 |
| 1446555_at   | -0.038384456 | 4.151713855 | -0.409713162 | 0.691192347 | 0.691192347 | -5.55149189  |
| 1416756_at   | 0.032694637  | 9.232670858 | 0.409614902  | 0.691261982 | 0.691261982 | -5.551530056 |



|                     |              |             |              |             |             |              |
|---------------------|--------------|-------------|--------------|-------------|-------------|--------------|
| 1430305_at          | -0.039203497 | 5.556027936 | -0.409601505 | 0.691271476 | 0.691271476 | -5.551535258 |
| 1458707_at          | -0.045546193 | 4.724211463 | -0.409508468 | 0.691337414 | 0.691337414 | -5.551571387 |
| 1434037_s_at        | 0.029569443  | 8.523490284 | 0.409418486  | 0.691401189 | 0.691401189 | -5.55160632  |
| 1449242_s_at        | 0.038796266  | 5.777186639 | 0.4093838    | 0.691425773 | 0.691425773 | -5.551619785 |
| 1458680_at          | -0.0354782   | 4.252501614 | -0.409335063 | 0.691460317 | 0.691460317 | -5.551638701 |
| AFFX-r2-Bs-lys-5_at | 0.071358912  | 4.16529076  | 0.409304429  | 0.69148203  | 0.69148203  | -5.55165059  |
| 1419410_at          | -0.028758207 | 7.414641578 | -0.409240124 | 0.69152761  | 0.69152761  | -5.551675545 |
| 1430097_at          | -0.04091389  | 5.707738963 | -0.409154693 | 0.691588167 | 0.691588167 | -5.551708691 |
| 1451670_at          | -0.049275057 | 5.263843959 | -0.409116425 | 0.691615293 | 0.691615293 | -5.551723537 |
| 1438263_at          | 0.046172421  | 4.514505602 | 0.40908644   | 0.691636548 | 0.691636548 | -5.551735168 |
| 1442264_at          | 0.037715184  | 5.222374265 | 0.4090464    | 0.691664932 | 0.691664932 | -5.551750698 |
| 1422680_at          | 0.028583892  | 8.68075606  | 0.409022294  | 0.69168202  | 0.69168202  | -5.551760048 |
| 1434497_at          | -0.055277374 | 6.244705887 | -0.409021474 | 0.691682601 | 0.691682601 | -5.551760366 |
| 1435136_at          | -0.040231874 | 7.293461434 | -0.409016295 | 0.691686272 | 0.691686272 | -5.551762374 |
| 1419794_at          | 0.043028246  | 4.144254852 | 0.409013552  | 0.691688217 | 0.691688217 | -5.551763438 |
| 1457164_at          | -0.040670827 | 5.191215518 | -0.408979782 | 0.691712157 | 0.691712157 | -5.551776534 |
| 1446074_at          | 0.043843421  | 4.958448157 | 0.40895428   | 0.691730235 | 0.691730235 | -5.551786424 |
| 1426505_at          | 0.039250833  | 4.902354824 | 0.408941171  | 0.691739528 | 0.691739528 | -5.551791507 |
| 1419495_at          | 0.037126094  | 6.178604741 | 0.408914478  | 0.691758451 | 0.691758451 | -5.551801857 |
| 1423950_at          | -0.034967062 | 4.390371064 | -0.408856483 | 0.691799566 | 0.691799566 | -5.551824342 |
| 1418322_at          | -0.047094132 | 6.04585376  | -0.408852602 | 0.691802317 | 0.691802317 | -5.551825846 |
| 1433979_at          | 0.030699607  | 9.220762873 | 0.408842359  | 0.691809579 | 0.691809579 | -5.551829817 |
| 1456334_s_at        | -0.065837835 | 7.184770678 | -0.408778867 | 0.691854592 | 0.691854592 | -5.551854429 |
| 1432655_at          | -0.038233589 | 5.49759184  | -0.408746057 | 0.691877853 | 0.691877853 | -5.551867146 |
| 1419494_a_at        | 0.02850838   | 8.63287929  | 0.408739353  | 0.691882606 | 0.691882606 | -5.551869745 |
| 1429943_at          | 0.042088339  | 4.431879063 | 0.408733779  | 0.691886558 | 0.691886558 | -5.551871905 |
| 1451503_at          | -0.030097937 | 5.829947077 | -0.408712243 | 0.691901827 | 0.691901827 | -5.551880252 |
| 1445627_at          | -0.025672032 | 3.98346832  | -0.408705774 | 0.691906413 | 0.691906413 | -5.551882759 |
| 1456530_x_at        | 0.044693088  | 9.257617821 | 0.408672287  | 0.691930155 | 0.691930155 | -5.551895736 |
| 1452698_at          | -0.024929301 | 7.889185489 | -0.408653579 | 0.691943419 | 0.691943419 | -5.551902985 |
| 1422896_at          | 0.035692714  | 7.127236796 | 0.408620199  | 0.691967086 | 0.691967086 | -5.551915919 |
| 1421602_at          | -0.027807482 | 5.019485876 | -0.408618852 | 0.691968041 | 0.691968041 | -5.551916441 |
| 1417103_at          | -0.027503384 | 9.339616081 | -0.408607947 | 0.691975773 | 0.691975773 | -5.551920666 |
| 1444406_at          | -0.043253085 | 7.158806755 | -0.408599385 | 0.691981843 | 0.691981843 | -5.551923984 |
| 1436123_at          | -0.034636331 | 3.982110404 | -0.408540544 | 0.692023564 | 0.692023564 | -5.55194678  |
| 1444348_at          | 0.029513584  | 5.387124242 | 0.408490306  | 0.692059184 | 0.692059184 | -5.55196624  |
| 1450545_a_at        | 0.043566368  | 4.947691229 | 0.408471458  | 0.692072549 | 0.692072549 | -5.551973541 |
| 1443784_at          | -0.039458001 | 3.255559579 | -0.408427383 | 0.692103801 | 0.692103801 | -5.551990612 |
| 1417442_a_at        | 0.03484561   | 7.923862588 | 0.408424609  | 0.692105768 | 0.692105768 | -5.551991686 |
| 1440775_at          | 0.031244343  | 3.316401512 | 0.408369596  | 0.692144777 | 0.692144777 | -5.55201299  |
| 1454871_at          | -0.029060232 | 8.070368481 | -0.408358961 | 0.692152318 | 0.692152318 | -5.552017109 |
| 1441342_at          | -0.040387655 | 3.783108841 | -0.408314135 | 0.692184105 | 0.692184105 | -5.552034466 |
| 1417483_at          | -0.066682264 | 7.121731636 | -0.408308695 | 0.692187962 | 0.692187962 | -5.552036572 |
| 1431478_at          | -0.036871105 | 4.93652763  | -0.40829322  | 0.692198936 | 0.692198936 | -5.552042563 |
| 1433360_at          | 0.037760966  | 6.046562896 | 0.40827024   | 0.692215232 | 0.692215232 | -5.55205146  |
| 1448054_at          | -0.038340502 | 4.964502071 | -0.408230556 | 0.692243373 | 0.692243373 | -5.552066823 |
| 1438603_x_at        | -0.027251304 | 4.481448932 | -0.408205994 | 0.69226079  | 0.69226079  | -5.552076331 |
| 1441918_x_at        | 0.029615431  | 7.449473302 | 0.408201262  | 0.692264146 | 0.692264146 | -5.552078163 |
| 1419550_a_at        | -0.056036723 | 7.052945679 | -0.408167068 | 0.692288395 | 0.692288395 | -5.552091398 |
| 1418362_at          | -0.047669433 | 3.739003676 | -0.408154054 | 0.692297624 | 0.692297624 | -5.552096435 |
| 1420599_at          | -0.030601257 | 3.582318557 | -0.408129863 | 0.69231478  | 0.69231478  | -5.552105798 |
| 1444797_at          | -0.066419362 | 4.198360243 | -0.408062305 | 0.692362691 | 0.692362691 | -5.552131942 |
| 1442637_at          | -0.050254314 | 5.459099105 | -0.407971173 | 0.692427321 | 0.692427321 | -5.552167202 |

|              |              |             |              |             |             |              |
|--------------|--------------|-------------|--------------|-------------|-------------|--------------|
| 1420978_at   | 0.028518365  | 6.953791712 | 0.407924708  | 0.692460276 | 0.692460276 | -5.552185177 |
| 1457902_at   | -0.037425353 | 4.404795569 | -0.407879481 | 0.692492353 | 0.692492353 | -5.552202672 |
| 1457868_at   | -0.0608015   | 4.429806302 | -0.40786116  | 0.692505347 | 0.692505347 | -5.552209758 |
| 1449829_at   | -0.038861094 | 5.182241334 | -0.407764701 | 0.692573762 | 0.692573762 | -5.552247061 |
| 1459130_at   | 0.036605055  | 4.606436602 | 0.407722678  | 0.692603569 | 0.692603569 | -5.552263311 |
| 1459530_at   | 0.042190398  | 5.025476343 | 0.407571052  | 0.69271112  | 0.69271112  | -5.552321926 |
| 1449607_at   | -0.037670092 | 5.719439694 | -0.407568279 | 0.692713088 | 0.692713088 | -5.552322998 |
| 1425755_at   | -0.047111925 | 5.148085849 | -0.407538126 | 0.692734477 | 0.692734477 | -5.552334652 |
| 1448740_at   | -0.027518666 | 8.635570833 | -0.407531349 | 0.692739284 | 0.692739284 | -5.552337271 |
| 1453071_s_at | -0.040117551 | 8.699242183 | -0.407518934 | 0.692748091 | 0.692748091 | -5.552342069 |
| 1459536_at   | -0.028364687 | 3.269052911 | -0.407513283 | 0.692752099 | 0.692752099 | -5.552344252 |
| 1419237_at   | 0.029064919  | 4.429782647 | 0.407511416  | 0.692753424 | 0.692753424 | -5.552344974 |
| 1431041_at   | -0.03137817  | 5.817362881 | -0.407509977 | 0.692754444 | 0.692754444 | -5.55234553  |
| 1422108_at   | 0.034992645  | 3.852654365 | 0.40750212   | 0.692760018 | 0.692760018 | -5.552348567 |
| 1423542_at   | -0.034689003 | 4.968953412 | -0.407481258 | 0.692774816 | 0.692774816 | -5.552356628 |
| 1439197_at   | 0.146659512  | 6.925496175 | 0.407466167  | 0.692785522 | 0.692785522 | -5.55236246  |
| 1430991_at   | -0.085681615 | 5.486148167 | -0.407431731 | 0.69280995  | 0.69280995  | -5.552375766 |
| 1460511_at   | -0.049414062 | 4.705096027 | -0.407425971 | 0.692814036 | 0.692814036 | -5.552377991 |
| 1428785_at   | -0.032418126 | 11.00244717 | -0.407385422 | 0.692842802 | 0.692842802 | -5.552393658 |
| 1442138_at   | -0.028075804 | 3.601618965 | -0.407370006 | 0.692853738 | 0.692853738 | -5.552399613 |
| 1416755_at   | 0.035866301  | 10.30259136 | 0.40735189   | 0.69286659  | 0.69286659  | -5.552406612 |
| 1419310_s_at | -0.032212392 | 7.181163121 | -0.407305675 | 0.692899375 | 0.692899375 | -5.552424464 |
| 1417807_at   | -0.059475784 | 6.119078342 | -0.407302415 | 0.692901688 | 0.692901688 | -5.552425724 |
| 1448246_at   | 0.028087944  | 10.35839911 | 0.407268053  | 0.692926066 | 0.692926066 | -5.552438996 |
| 1443328_at   | 0.030910558  | 3.800670772 | 0.407148721  | 0.693010727 | 0.693010727 | -5.552485079 |
| 1421606_a_at | -0.058164313 | 4.282284562 | -0.407144707 | 0.693013575 | 0.693013575 | -5.552486629 |
| 1443949_at   | -0.036740604 | 7.808531146 | -0.407131372 | 0.693023036 | 0.693023036 | -5.552491778 |
| 1432424_at   | 0.038588779  | 3.405582137 | 0.407111767  | 0.693036945 | 0.693036945 | -5.552499348 |
| 1420205_at   | 0.036213297  | 3.53421234  | 0.407036207  | 0.693090555 | 0.693090555 | -5.552528518 |
| 1439475_at   | 0.070361819  | 4.702181494 | 0.407034361  | 0.693091865 | 0.693091865 | -5.552529231 |
| 1435528_at   | -0.055304149 | 7.94437711  | -0.406990182 | 0.693123211 | 0.693123211 | -5.552546284 |
| 1423727_at   | -0.029335364 | 11.02898293 | -0.406986412 | 0.693125886 | 0.693125886 | -5.552547739 |
| 1447342_at   | 0.0474809    | 3.967956621 | 0.406960541  | 0.693144242 | 0.693144242 | -5.552557724 |
| 1428666_at   | 0.02655511   | 9.963478682 | 0.406941583  | 0.693157694 | 0.693157694 | -5.552565041 |
| 1445591_at   | -0.03009991  | 4.507224686 | -0.406881678 | 0.693200199 | 0.693200199 | -5.552588159 |
| 1444111_at   | 0.041381532  | 5.51277042  | 0.406880061  | 0.693201347 | 0.693201347 | -5.552588783 |
| 1431575_at   | -0.026690559 | 5.485377756 | -0.406852525 | 0.693220885 | 0.693220885 | -5.552599408 |
| 1450145_at   | -0.031782111 | 4.546509984 | -0.406844389 | 0.693226658 | 0.693226658 | -5.552602547 |
| 1447095_at   | 0.03298691   | 4.87557876  | 0.406784164  | 0.693269393 | 0.693269393 | -5.552625783 |
| 1452351_at   | 0.046568927  | 5.209272686 | 0.406720966  | 0.693314239 | 0.693314239 | -5.552650163 |
| 1457638_x_at | -0.045274576 | 5.295493193 | -0.406653107 | 0.693362393 | 0.693362393 | -5.552676336 |
| 1424302_at   | -0.034728539 | 4.090509896 | -0.406649622 | 0.693364866 | 0.693364866 | -5.55267768  |
| 1419092_a_at | 0.026742261  | 6.712435323 | 0.406618052  | 0.693387269 | 0.693387269 | -5.552689856 |
| 1437736_at   | 0.028197524  | 4.787627916 | 0.406573906  | 0.693418597 | 0.693418597 | -5.552706879 |
| 1449874_at   | 0.05242456   | 5.529432922 | 0.406553364  | 0.693433176 | 0.693433176 | -5.5527148   |
| 1429895_at   | -0.04205952  | 6.06221774  | -0.406548454 | 0.69343666  | 0.69343666  | -5.552716693 |
| 1431366_at   | -0.026033851 | 3.203288211 | -0.406524852 | 0.693453409 | 0.693453409 | -5.552725793 |
| 1451216_at   | -0.036012149 | 9.558813023 | -0.406481943 | 0.693483861 | 0.693483861 | -5.552742336 |
| 1428658_at   | 0.034325528  | 8.472637177 | 0.406470709  | 0.693491834 | 0.693491834 | -5.552746667 |
| 1426922_s_at | 0.038717608  | 6.937174293 | 0.406442727  | 0.693511693 | 0.693511693 | -5.552757454 |
| 1443849_x_at | 0.03313766   | 9.623998314 | 0.406406954  | 0.693537081 | 0.693537081 | -5.552771243 |
| 1438248_at   | 0.040421426  | 5.490067092 | 0.406367243  | 0.693565264 | 0.693565264 | -5.552786549 |
| 1447929_at   | 0.041897087  | 5.667941156 | 0.406357112  | 0.693572454 | 0.693572454 | -5.552790453 |

|              |              |             |              |             |             |              |
|--------------|--------------|-------------|--------------|-------------|-------------|--------------|
| 1449645_s_at | -0.029983957 | 10.08870821 | -0.406356372 | 0.69357298  | 0.69357298  | -5.552790739 |
| 1460113_at   | -0.060595384 | 5.422798375 | -0.406318499 | 0.69359986  | 0.69359986  | -5.552805335 |
| 1416141_a_at | -0.024445359 | 14.18327352 | -0.406280389 | 0.693626908 | 0.693626908 | -5.55282002  |
| 1428263_a_at | 0.027774603  | 11.47655444 | 0.406251115  | 0.693647685 | 0.693647685 | -5.5528313   |
| 1429705_at   | -0.02759605  | 5.405211697 | -0.406228007 | 0.693664086 | 0.693664086 | -5.552840203 |
| 1454948_at   | -0.02716875  | 9.426131295 | -0.406223744 | 0.693667113 | 0.693667113 | -5.552841846 |
| 1423038_at   | 0.037311061  | 9.151975597 | 0.406222059  | 0.693668308 | 0.693668308 | -5.552842495 |
| 1454264_at   | 0.027517366  | 3.730671498 | 0.406186452  | 0.693693581 | 0.693693581 | -5.552856213 |
| 1423446_at   | 0.032575196  | 7.226999162 | 0.406186155  | 0.693693792 | 0.693693792 | -5.552856327 |
| 1418560_at   | -0.026061719 | 10.50745241 | -0.406150552 | 0.693719062 | 0.693719062 | -5.552870043 |
| 1441448_at   | 0.060286878  | 5.563563502 | 0.406113424  | 0.693745416 | 0.693745416 | -5.552884345 |
| 1443780_at   | -0.052796318 | 4.728299214 | -0.406094942 | 0.693758535 | 0.693758535 | -5.552891464 |
| 1458575_at   | -0.034705258 | 8.729423757 | -0.406014627 | 0.693815544 | 0.693815544 | -5.552922395 |
| 1460319_at   | 0.047812871  | 9.082793232 | 0.405972506  | 0.693845443 | 0.693845443 | -5.552938614 |
| 1425038_at   | -0.033426307 | 3.6572184   | -0.405944377 | 0.69386541  | 0.69386541  | -5.552949445 |
| 1434694_at   | 0.024236874  | 8.456652018 | 0.405903563  | 0.693894383 | 0.693894383 | -5.552965159 |
| 1435308_at   | 0.067617962  | 4.550396837 | 0.405899083  | 0.693897563 | 0.693897563 | -5.552966884 |
| 1416519_at   | 0.029519104  | 13.31940332 | 0.405847327  | 0.693934303 | 0.693934303 | -5.552986808 |
| 1440724_at   | -0.030564977 | 6.248779885 | -0.405793426 | 0.693972567 | 0.693972567 | -5.553007555 |
| 1425585_at   | 0.035308745  | 8.750176538 | 0.405756373  | 0.693998872 | 0.693998872 | -5.553021816 |
| 1448570_at   | -0.0301058   | 10.63130265 | -0.405693341 | 0.694043619 | 0.694043619 | -5.553046072 |
| 1441492_at   | -0.042284941 | 5.707702665 | -0.405682765 | 0.694051128 | 0.694051128 | -5.553050142 |
| 1439741_x_at | -0.053401451 | 5.146817288 | -0.40567635  | 0.694055682 | 0.694055682 | -5.55305261  |
| 1416496_at   | 0.026684026  | 12.50205677 | 0.405672686  | 0.694058283 | 0.694058283 | -5.55305402  |
| 1455015_at   | 0.034749825  | 5.575179216 | 0.405607835  | 0.694104325 | 0.694104325 | -5.553078972 |
| 1438314_at   | 0.029830744  | 3.674045928 | 0.405602277  | 0.69410827  | 0.69410827  | -5.55308111  |
| 1450982_at   | -0.031582965 | 7.677131576 | -0.40557948  | 0.694124456 | 0.694124456 | -5.55308988  |
| 1418383_at   | 0.051803132  | 7.56060825  | 0.405574957  | 0.694127667 | 0.694127667 | -5.55309162  |
| 1457596_at   | -0.041325751 | 3.608795205 | -0.405559298 | 0.694138784 | 0.694138784 | -5.553097644 |
| 1429698_at   | -0.027715543 | 7.050683011 | -0.405543032 | 0.694150333 | 0.694150333 | -5.553103901 |
| 1429302_at   | -0.025428538 | 7.732244985 | -0.405447276 | 0.694218319 | 0.694218319 | -5.55314073  |
| 1439086_at   | 0.030254771  | 3.587088124 | 0.405437636  | 0.694225163 | 0.694225163 | -5.553144437 |
| 1456805_a_at | 0.033906619  | 5.375743654 | 0.405436081  | 0.694226267 | 0.694226267 | -5.553145035 |
| 1459973_x_at | -0.029287064 | 3.23749444  | -0.405427933 | 0.694232052 | 0.694232052 | -5.553148168 |
| 1459092_at   | -0.028217516 | 3.22178439  | -0.405411524 | 0.694243704 | 0.694243704 | -5.553154479 |
| 1427400_at   | 0.02929364   | 3.979268462 | 0.40539847   | 0.694252972 | 0.694252972 | -5.553159498 |
| 1446046_at   | 0.045030731  | 3.749646112 | 0.405388373  | 0.694260141 | 0.694260141 | -5.553163381 |
| 1416454_s_at | -0.072454988 | 10.8030002  | -0.405349717 | 0.694287588 | 0.694287588 | -5.553178244 |
| 1444376_at   | -0.035578797 | 5.03505999  | -0.405267447 | 0.694346005 | 0.694346005 | -5.553209873 |
| 1425459_at   | -0.028845074 | 7.743982285 | -0.405251346 | 0.694357438 | 0.694357438 | -5.553216062 |
| 1445584_at   | -0.043848245 | 4.297764187 | -0.405241196 | 0.694364645 | 0.694364645 | -5.553219964 |
| 1437274_at   | -0.054230323 | 7.880701357 | -0.405238827 | 0.694366327 | 0.694366327 | -5.553220874 |
| 1430160_at   | 0.029134862  | 5.647093403 | 0.405233476  | 0.694370127 | 0.694370127 | -5.553222931 |
| 1456135_s_at | 0.03351199   | 10.33338856 | 0.405226123  | 0.694375348 | 0.694375348 | -5.553225757 |
| 1446809_at   | 0.023964748  | 3.580098359 | 0.405130627  | 0.694443159 | 0.694443159 | -5.553262459 |
| 1447280_at   | 0.03261402   | 3.750517464 | 0.405120761  | 0.694450165 | 0.694450165 | -5.55326625  |
| 1455717_s_at | 0.033930413  | 7.401159061 | 0.40511506   | 0.694454213 | 0.694454213 | -5.553268441 |
| 1425688_a_at | -0.037349432 | 3.534576112 | -0.405080242 | 0.694478939 | 0.694478939 | -5.55328182  |
| 1422764_at   | 0.0259675    | 10.61707315 | 0.405076497  | 0.694481598 | 0.694481598 | -5.553283259 |
| 1427692_a_at | -0.032229957 | 8.291710811 | -0.405051592 | 0.694499284 | 0.694499284 | -5.553292828 |
| 1421014_a_at | -0.046841907 | 7.201197034 | -0.405021957 | 0.694520329 | 0.694520329 | -5.553304214 |
| 1437715_x_at | 0.036854489  | 10.66965909 | 0.405017342  | 0.694523606 | 0.694523606 | -5.553305987 |
| 1419061_at   | 0.035327128  | 7.520395863 | 0.404948054  | 0.694572811 | 0.694572811 | -5.553332604 |

|              |              |             |              |             |             |              |
|--------------|--------------|-------------|--------------|-------------|-------------|--------------|
| 1449596_at   | 0.039134456  | 3.444497356 | 0.404943379  | 0.694576131 | 0.694576131 | -5.5533344   |
| 1423433_at   | -0.027071244 | 8.363920279 | -0.404907519 | 0.694601599 | 0.694601599 | -5.553348174 |
| 1457411_at   | -0.04016711  | 4.582906331 | -0.40487368  | 0.694625631 | 0.694625631 | -5.55336117  |
| 1448993_at   | 0.025736922  | 9.611416801 | 0.404799357  | 0.694678415 | 0.694678415 | -5.553389711 |
| 1416447_at   | 0.047217506  | 8.821912789 | 0.404691272  | 0.69475518  | 0.69475518  | -5.553431209 |
| 1436009_at   | -0.03533551  | 6.958477254 | -0.404651612 | 0.694783348 | 0.694783348 | -5.553446433 |
| 1422428_at   | -0.027198252 | 4.466505131 | -0.40460969  | 0.694813125 | 0.694813125 | -5.553462524 |
| 1427596_at   | 0.036586507  | 3.957458553 | 0.404585533  | 0.694830283 | 0.694830283 | -5.553471795 |
| 1423868_at   | -0.057922279 | 6.184330349 | -0.404569237 | 0.694841857 | 0.694841857 | -5.553478049 |
| 1434473_at   | 0.051271164  | 4.911993219 | 0.404513018  | 0.694881789 | 0.694881789 | -5.553499623 |
| 1458427_at   | 0.040144566  | 5.387926981 | 0.404396366  | 0.69496465  | 0.69496465  | -5.553544379 |
| 1425159_at   | -0.028193692 | 4.151914341 | -0.404361183 | 0.694989642 | 0.694989642 | -5.553557875 |
| 1423676_at   | -0.025613404 | 11.79229056 | -0.404285093 | 0.695043694 | 0.695043694 | -5.553587059 |
| 1450751_at   | 0.048744729  | 4.304775494 | 0.404264436  | 0.695058368 | 0.695058368 | -5.553594981 |
| 1428260_at   | 0.054611817  | 6.187389313 | 0.404177792  | 0.695119919 | 0.695119919 | -5.553628205 |
| 1424303_at   | -0.058381498 | 5.567999206 | -0.404176189 | 0.695121058 | 0.695121058 | -5.55362882  |
| 1420162_at   | 0.042221173  | 4.054293256 | 0.40415484   | 0.695136225 | 0.695136225 | -5.553637005 |
| 1417150_at   | -0.038577164 | 4.989384013 | -0.404103932 | 0.695172391 | 0.695172391 | -5.553656522 |
| 1460311_at   | 0.033555411  | 3.324811085 | 0.404074491  | 0.695193307 | 0.695193307 | -5.553667808 |
| 1438740_at   | -0.026864019 | 5.44857435  | -0.404038373 | 0.695218967 | 0.695218967 | -5.553681652 |
| 1434642_at   | 0.036410727  | 9.197301355 | 0.403995216  | 0.695249628 | 0.695249628 | -5.553698192 |
| 1432598_at   | 0.037352315  | 4.060484984 | 0.403989564  | 0.695253643 | 0.695253643 | -5.553700359 |
| 1446128_at   | 0.037642771  | 3.396509443 | 0.403918507  | 0.695304128 | 0.695304128 | -5.553727589 |
| 1425046_at   | -0.03898735  | 4.26022844  | -0.403907306 | 0.695312086 | 0.695312086 | -5.553731881 |
| 1450025_at   | -0.042316769 | 7.320807855 | -0.40389868  | 0.695318215 | 0.695318215 | -5.553735186 |
| 1459328_at   | 0.066641611  | 5.736952186 | 0.403891091  | 0.695323607 | 0.695323607 | -5.553738094 |
| 1455937_at   | -0.031218196 | 3.263873923 | -0.403869563 | 0.695338903 | 0.695338903 | -5.553746342 |
| 1428468_at   | 0.02893242   | 7.986351279 | 0.403819793  | 0.695374265 | 0.695374265 | -5.553765409 |
| 1424005_at   | 0.03082721   | 11.26474929 | 0.403793516  | 0.695392935 | 0.695392935 | -5.553775476 |
| 1454702_at   | -0.060206911 | 6.252448023 | -0.40373588  | 0.695433888 | 0.695433888 | -5.553797552 |
| 1421222_at   | 0.03883082   | 3.54932083  | 0.403707781  | 0.695453853 | 0.695453853 | -5.553808314 |
| 1452022_at   | -0.031468233 | 3.44627994  | -0.403702209 | 0.695457813 | 0.695457813 | -5.553810448 |
| 1447487_at   | -0.036606546 | 3.267245848 | -0.403653781 | 0.695492224 | 0.695492224 | -5.553828994 |
| 1432668_at   | 0.026923855  | 3.371792643 | 0.403639863  | 0.695502114 | 0.695502114 | -5.553834324 |
| 1442331_at   | -0.050290606 | 5.645562899 | -0.403592154 | 0.695536015 | 0.695536015 | -5.553852592 |
| 1434463_at   | 0.029626492  | 5.2807231   | 0.403582623  | 0.695542787 | 0.695542787 | -5.553856241 |
| 1420200_at   | -0.034817625 | 3.125840286 | -0.403570448 | 0.695551439 | 0.695551439 | -5.553860902 |
| 1418065_at   | -0.048437797 | 5.079169969 | -0.403567556 | 0.695553494 | 0.695553494 | -5.55386201  |
| 1424183_at   | -0.02506559  | 11.0359729  | -0.403547891 | 0.695567468 | 0.695567468 | -5.553869539 |
| 1442037_at   | -0.034025915 | 3.800114619 | -0.403541132 | 0.695572271 | 0.695572271 | -5.553872126 |
| 1420812_at   | -0.059727757 | 7.4275321   | -0.403495381 | 0.695604783 | 0.695604783 | -5.55388964  |
| 1437591_a_at | 0.033690653  | 9.063847942 | 0.403471893  | 0.695621473 | 0.695621473 | -5.553898631 |
| 1453650_at   | -0.031016997 | 5.930457515 | -0.403445251 | 0.695640407 | 0.695640407 | -5.553908829 |
| 1457496_at   | 0.030601218  | 3.929949802 | 0.403439125  | 0.69564476  | 0.69564476  | -5.553911173 |
| 1436693_x_at | -0.038726254 | 6.870894356 | -0.40342694  | 0.695653419 | 0.695653419 | -5.553915837 |
| 1448748_at   | 0.059813636  | 6.663598666 | 0.403403612  | 0.695669997 | 0.695669997 | -5.553924765 |
| 1442733_at   | 0.083424945  | 5.093048845 | 0.403402753  | 0.695670607 | 0.695670607 | -5.553925093 |
| 1434233_at   | 0.02736275   | 8.376675639 | 0.403388485  | 0.695680747 | 0.695680747 | -5.553930554 |
| 1455401_at   | 0.036536199  | 7.799893735 | 0.403379224  | 0.695687328 | 0.695687328 | -5.553934098 |
| 1434263_at   | 0.032272672  | 7.432192455 | 0.403377306  | 0.695688691 | 0.695688691 | -5.553934832 |
| 1459518_at   | 0.032840246  | 4.915850697 | 0.403337489  | 0.695716988 | 0.695716988 | -5.553950069 |
| 1453050_at   | -0.035103206 | 6.83255271  | -0.403301804 | 0.695742348 | 0.695742348 | -5.553963723 |
| 1441005_at   | 0.030399373  | 4.351601121 | 0.403299303  | 0.695744126 | 0.695744126 | -5.55396468  |

|              |              |             |              |             |             |              |
|--------------|--------------|-------------|--------------|-------------|-------------|--------------|
| 1449395_at   | -0.032843268 | 3.798724543 | -0.403296655 | 0.695746007 | 0.695746007 | -5.553965693 |
| 1446419_at   | 0.042212272  | 4.03548704  | 0.403273243  | 0.695762646 | 0.695762646 | -5.553974651 |
| 1459370_at   | 0.028842274  | 3.241040532 | 0.403218028  | 0.695801888 | 0.695801888 | -5.553995774 |
| 1431184_a_at | 0.026786842  | 3.348801716 | 0.403209103  | 0.695808231 | 0.695808231 | -5.553999188 |
| 1446134_at   | 0.04819154   | 3.685595323 | 0.403204947  | 0.695811184 | 0.695811184 | -5.554000778 |
| 1456471_x_at | -0.101681385 | 8.593812885 | -0.403116334 | 0.695874164 | 0.695874164 | -5.554034671 |
| 1420135_at   | 0.035978807  | 5.278827059 | 0.40309791   | 0.695887259 | 0.695887259 | -5.554041718 |
| 1419743_s_at | -0.054559854 | 10.01227013 | -0.403057349 | 0.695916088 | 0.695916088 | -5.554057229 |
| 1443705_at   | 0.028954369  | 3.953492361 | 0.402991043  | 0.695963216 | 0.695963216 | -5.554082582 |
| 1422417_at   | 0.035219018  | 3.867194067 | 0.402989084  | 0.695964608 | 0.695964608 | -5.55408333  |
| 1442425_at   | -0.039644866 | 3.410764976 | -0.402952762 | 0.695990425 | 0.695990425 | -5.554097217 |
| 1427569_a_at | 0.04031402   | 6.93497961  | 0.402922072  | 0.69601224  | 0.69601224  | -5.554108949 |
| 1425234_at   | -0.030910933 | 4.535891303 | -0.402916074 | 0.696016503 | 0.696016503 | -5.554111242 |
| 1433049_at   | 0.033040213  | 3.687900134 | 0.402892476  | 0.696033277 | 0.696033277 | -5.554120263 |
| 1456759_at   | 0.02974823   | 5.735422457 | 0.40285037   | 0.696063206 | 0.696063206 | -5.554136356 |
| 1446951_at   | 0.056599435  | 7.438062157 | 0.402841587  | 0.696069449 | 0.696069449 | -5.554139713 |
| 1425791_at   | -0.032945626 | 4.417456296 | -0.402821102 | 0.69608401  | 0.69608401  | -5.554147542 |
| 1453045_at   | -0.03661063  | 8.62412404  | -0.402800039 | 0.696098983 | 0.696098983 | -5.554155592 |
| 1425104_at   | 0.028436629  | 6.849493978 | 0.402789282  | 0.696106629 | 0.696106629 | -5.554159703 |
| 1417058_a_at | 0.035944113  | 10.12208159 | 0.402758929  | 0.696128205 | 0.696128205 | -5.554171302 |
| 1456902_at   | 0.04402955   | 3.944419979 | 0.402756295  | 0.696130078 | 0.696130078 | -5.554172308 |
| 1454951_at   | 0.04502572   | 7.349424831 | 0.402748894  | 0.696135339 | 0.696135339 | -5.554175136 |
| 1458953_at   | 0.031663192  | 4.382281525 | 0.402655895  | 0.696201449 | 0.696201449 | -5.554210669 |
| 1417339_a_at | 0.033169856  | 12.97981884 | 0.402610839  | 0.696233479 | 0.696233479 | -5.55422788  |
| 1417490_at   | -0.032908441 | 10.98724955 | -0.402336613 | 0.696428437 | 0.696428437 | -5.554332596 |
| 1433771_at   | 0.059147468  | 8.623416315 | 0.402334266  | 0.696430106 | 0.696430106 | -5.554333492 |
| 1442015_at   | 0.028025332  | 5.199009373 | 0.402309589  | 0.696447651 | 0.696447651 | -5.554342912 |
| 1431916_at   | -0.039252763 | 3.833953935 | -0.402239371 | 0.696497576 | 0.696497576 | -5.554369713 |
| 1449119_at   | 0.030657673  | 7.334661459 | 0.402226232  | 0.696506918 | 0.696506918 | -5.554374727 |
| 1445130_at   | -0.041453417 | 3.591230867 | -0.402171119 | 0.696546105 | 0.696546105 | -5.554395759 |
| 1460182_at   | 0.02722394   | 9.743437915 | 0.402138603  | 0.696569225 | 0.696569225 | -5.554408166 |
| 1419811_at   | -0.042111381 | 5.958893324 | -0.40212655  | 0.696577795 | 0.696577795 | -5.554412765 |
| 1419891_s_at | 0.044548419  | 4.402212261 | 0.402079131  | 0.696611513 | 0.696611513 | -5.554430857 |
| 1440145_at   | 0.027537963  | 3.399149801 | 0.40204645   | 0.696634751 | 0.696634751 | -5.554443324 |
| 1420950_at   | 0.036922519  | 7.604879741 | 0.402045396  | 0.696635501 | 0.696635501 | -5.554443726 |
| 1458892_at   | 0.053168092  | 7.014899778 | 0.40203116   | 0.696645623 | 0.696645623 | -5.554449156 |
| 1452483_a_at | -0.046206587 | 7.435653476 | -0.402018026 | 0.696654963 | 0.696654963 | -5.554454166 |
| 1447573_at   | -0.033097734 | 4.896993298 | -0.402013384 | 0.696658264 | 0.696658264 | -5.554455937 |
| 1436486_x_at | -0.034704973 | 3.714955168 | -0.40200027  | 0.696667588 | 0.696667588 | -5.554460939 |
| 1443614_at   | 0.027672301  | 3.639734638 | 0.401920559  | 0.696724271 | 0.696724271 | -5.55449134  |
| 1460208_at   | 0.035309562  | 10.71194134 | 0.40190542   | 0.696735036 | 0.696735036 | -5.554497114 |
| 1430056_at   | 0.048361041  | 6.863542138 | 0.401902887  | 0.696736838 | 0.696736838 | -5.554498079 |
| 1435396_at   | 0.033466901  | 7.068145613 | 0.40184209   | 0.696780072 | 0.696780072 | -5.554521262 |
| 1458147_at   | 0.055066632  | 5.172672545 | 0.401694117  | 0.696885304 | 0.696885304 | -5.554577672 |
| 1434678_at   | -0.040718056 | 9.200136785 | -0.401690764 | 0.696887689 | 0.696887689 | -5.55457895  |
| 1428927_at   | -0.041687476 | 6.858983179 | -0.401678226 | 0.696896606 | 0.696896606 | -5.554583729 |
| 1438231_at   | 0.0871899    | 8.07966989  | 0.401649898  | 0.696916752 | 0.696916752 | -5.554594525 |
| 1419461_at   | 0.033411123  | 8.338114721 | 0.401617066  | 0.696940103 | 0.696940103 | -5.554607037 |
| 1453471_at   | 0.063864156  | 5.732158418 | 0.401613895  | 0.696942358 | 0.696942358 | -5.554608246 |
| 1429035_at   | 0.04697129   | 3.689693213 | 0.401592081  | 0.696957872 | 0.696957872 | -5.554616558 |
| 1432047_at   | -0.044686828 | 4.618422523 | -0.40159158  | 0.696958228 | 0.696958228 | -5.554616749 |
| 1456216_at   | -0.041117177 | 9.290116804 | -0.401495346 | 0.697026673 | 0.697026673 | -5.554653416 |
| 1419375_at   | 0.031586697  | 8.653249004 | 0.401485282  | 0.697033831 | 0.697033831 | -5.55465725  |

|              |              |             |              |             |             |              |
|--------------|--------------|-------------|--------------|-------------|-------------|--------------|
| 1433882_at   | 0.025452775  | 9.156012629 | 0.401458453  | 0.697052913 | 0.697052913 | -5.55466747  |
| 1421159_at   | -0.039679612 | 4.042002851 | -0.401428092 | 0.697074508 | 0.697074508 | -5.554679035 |
| 1455435_s_at | 0.050188584  | 5.513476788 | 0.40142329   | 0.697077923 | 0.697077923 | -5.554680864 |
| 1454575_at   | 0.029049915  | 3.395444002 | 0.401399871  | 0.69709458  | 0.69709458  | -5.554689784 |
| 1435281_at   | 0.031240038  | 8.625027233 | 0.401375129  | 0.697112179 | 0.697112179 | -5.554699208 |
| 1446932_at   | -0.051926872 | 4.725874054 | -0.401367877 | 0.697117337 | 0.697117337 | -5.55470197  |
| 1428678_s_at | 0.029751159  | 7.306880912 | 0.401343127  | 0.697134941 | 0.697134941 | -5.554711396 |
| 1421363_at   | -0.0362773   | 4.454501479 | -0.401338684 | 0.697138101 | 0.697138101 | -5.554713088 |
| 1451495_at   | 0.0320732    | 10.01640211 | 0.401328764  | 0.697145158 | 0.697145158 | -5.554716866 |
| 1439032_at   | -0.025933708 | 6.945549284 | -0.401323388 | 0.697148982 | 0.697148982 | -5.554718913 |
| 1450394_at   | -0.049090216 | 9.776343974 | -0.40128008  | 0.697179787 | 0.697179787 | -5.554735404 |
| 1439401_x_at | 0.037671442  | 8.038928574 | 0.401273559  | 0.697184425 | 0.697184425 | -5.554737887 |
| 1459216_at   | -0.038634719 | 3.77544595  | -0.401232887 | 0.697213356 | 0.697213356 | -5.554753373 |
| 1440190_at   | -0.028780045 | 5.15186921  | -0.401219821 | 0.69722265  | 0.69722265  | -5.554758347 |
| 1446714_x_at | 0.042070356  | 3.281996072 | 0.401138063  | 0.697280808 | 0.697280808 | -5.554789471 |
| 1436031_at   | 0.044888443  | 8.013030262 | 0.401117901  | 0.69729515  | 0.69729515  | -5.554797145 |
| 1455850_at   | -0.031607108 | 7.040172938 | -0.401024369 | 0.697361687 | 0.697361687 | -5.554832742 |
| 1458336_at   | -0.02722619  | 3.280923399 | -0.400994801 | 0.697382721 | 0.697382721 | -5.554843993 |
| 1436641_at   | -0.038934587 | 5.938191812 | -0.400992473 | 0.697384377 | 0.697384377 | -5.554844879 |
| 1425552_at   | -0.037035757 | 6.616241902 | -0.400980803 | 0.69739268  | 0.69739268  | -5.554849319 |
| 1449962_at   | -0.029722773 | 3.305601679 | -0.400963639 | 0.69740489  | 0.69740489  | -5.55485585  |
| 1449667_at   | 0.035307278  | 4.709075686 | 0.400961235  | 0.6974066   | 0.6974066   | -5.554856765 |
| 1429312_s_at | 0.045417561  | 6.221959138 | 0.400912667  | 0.697441153 | 0.697441153 | -5.554875243 |
| 1453101_at   | -0.026840854 | 8.743323467 | -0.400896932 | 0.697452347 | 0.697452347 | -5.554881229 |
| 1447140_at   | 0.032964138  | 3.515739797 | 0.40088287   | 0.697462351 | 0.697462351 | -5.554886578 |
| 1445365_at   | -0.036164803 | 3.410092299 | -0.400872993 | 0.697469377 | 0.697469377 | -5.554890335 |
| 1450158_at   | 0.024503394  | 5.654509192 | 0.400856433  | 0.697481159 | 0.697481159 | -5.554896635 |
| 1424172_at   | -0.028483212 | 7.569251226 | -0.400751671 | 0.697555693 | 0.697555693 | -5.55493648  |
| 1424267_at   | -0.039657721 | 6.807163036 | -0.400696663 | 0.69759483  | 0.69759483  | -5.554957397 |
| 1454854_at   | -0.027501733 | 5.190326462 | -0.400694529 | 0.697596348 | 0.697596348 | -5.554958209 |
| 1445069_at   | 0.024371718  | 3.127644033 | 0.400666712  | 0.697616141 | 0.697616141 | -5.554968786 |
| 1422787_at   | -0.042817809 | 6.336717321 | -0.400656212 | 0.697623611 | 0.697623611 | -5.554972778 |
| 1450477_at   | 0.044386025  | 3.410915694 | 0.400650313  | 0.697627808 | 0.697627808 | -5.554975021 |
| 1434095_at   | -0.026865042 | 5.93510781  | -0.400649325 | 0.697628511 | 0.697628511 | -5.554975396 |
| 1445611_at   | -0.032969979 | 4.518613266 | -0.400624501 | 0.697646174 | 0.697646174 | -5.554984834 |
| 1453950_a_at | 0.044556815  | 4.845662157 | 0.400620299  | 0.697649164 | 0.697649164 | -5.554986431 |
| 1451253_at   | 0.059649592  | 7.367913554 | 0.4005487    | 0.697700108 | 0.697700108 | -5.555013649 |
| 1425745_a_at | 0.030897537  | 10.30822359 | 0.400420795  | 0.69779112  | 0.69779112  | -5.555062258 |
| 1441881_x_at | 0.035933525  | 7.536381268 | 0.400405344  | 0.697802115 | 0.697802115 | -5.55506813  |
| 1416545_at   | -0.029394389 | 8.364965194 | -0.400342228 | 0.697847027 | 0.697847027 | -5.55509211  |
| 1418433_at   | 0.030228223  | 8.732411154 | 0.400333492  | 0.697853244 | 0.697853244 | -5.555095429 |
| 1442159_at   | -0.046360957 | 5.019153955 | -0.400315785 | 0.697865844 | 0.697865844 | -5.555102156 |
| 1443240_at   | -0.062848745 | 8.834663421 | -0.400290634 | 0.697883742 | 0.697883742 | -5.55511171  |
| 1441391_at   | 0.034316779  | 7.96228755  | 0.400265619  | 0.697901543 | 0.697901543 | -5.555121212 |
| 1435394_s_at | 0.037093139  | 10.47243705 | 0.400201674  | 0.697947049 | 0.697947049 | -5.5551455   |
| 1446792_at   | 0.045768677  | 3.186691816 | 0.400166497  | 0.697972083 | 0.697972083 | -5.555158859 |
| 1432786_at   | -0.053012417 | 4.331573542 | -0.400160307 | 0.697976488 | 0.697976488 | -5.55516121  |
| 1416441_at   | -0.046114593 | 8.163717855 | -0.400153635 | 0.697981236 | 0.697981236 | -5.555163743 |
| 1424133_at   | -0.027407727 | 10.17309054 | -0.400138738 | 0.697991837 | 0.697991837 | -5.5551694   |
| 1437085_at   | -0.046019107 | 4.705556946 | -0.400137468 | 0.697992741 | 0.697992741 | -5.555169883 |
| 1444090_at   | 0.03720502   | 5.182078064 | 0.400135662  | 0.697994026 | 0.697994026 | -5.555170568 |
| 1422121_at   | 0.047167369  | 4.05990622  | 0.400061687  | 0.698046673 | 0.698046673 | -5.555198656 |
| 1423008_at   | -0.02695982  | 3.240003562 | -0.400038725 | 0.698063015 | 0.698063015 | -5.555207374 |

|              |              |             |              |             |             |              |
|--------------|--------------|-------------|--------------|-------------|-------------|--------------|
| 1417205_at   | 0.058511274  | 9.158389357 | 0.40003187   | 0.698067894 | 0.698067894 | -5.555209976 |
| 1437873_at   | 0.047117311  | 9.12894522  | 0.400027028  | 0.698071339 | 0.698071339 | -5.555211814 |
| 1421075_s_at | 0.050143053  | 7.422635336 | 0.399927041  | 0.698142502 | 0.698142502 | -5.555249768 |
| 1435893_at   | 0.049425641  | 6.851664782 | 0.399914937  | 0.698151116 | 0.698151116 | -5.555254361 |
| 1452560_a_at | 0.027718216  | 8.559944429 | 0.399829032  | 0.698212259 | 0.698212259 | -5.555286961 |
| 1418099_at   | -0.045073145 | 5.658200648 | -0.399653934 | 0.698336892 | 0.698336892 | -5.555353387 |
| 1433009_at   | -0.042104544 | 4.661146048 | -0.399575463 | 0.69839275  | 0.69839275  | -5.555383148 |
| 1441683_at   | 0.127897844  | 6.626264882 | 0.399561131  | 0.698402951 | 0.698402951 | -5.555388582 |
| 1428049_a_at | 0.027874309  | 8.658270999 | 0.399542954  | 0.698415891 | 0.698415891 | -5.555395475 |
| 1448660_at   | 0.035475742  | 6.828622556 | 0.399476187  | 0.69846342  | 0.69846342  | -5.55542079  |
| 1425015_at   | -0.031882455 | 7.885064152 | -0.399437969 | 0.698490626 | 0.698490626 | -5.555435279 |
| 1426386_at   | 0.031203661  | 9.423336168 | 0.399417789  | 0.698504992 | 0.698504992 | -5.555442929 |
| 1459660_at   | -0.037340158 | 5.222521998 | -0.399413607 | 0.698507969 | 0.698507969 | -5.555444514 |
| 1425242_at   | 0.026731035  | 7.355696586 | 0.399412883  | 0.698508484 | 0.698508484 | -5.555444788 |
| 1454149_a_at | -0.033603588 | 10.00198042 | -0.399409328 | 0.698511015 | 0.698511015 | -5.555446136 |
| 1432172_at   | -0.032700936 | 5.031290293 | -0.399405747 | 0.698513564 | 0.698513564 | -5.555447493 |
| 1431522_at   | 0.074929641  | 4.319549174 | 0.399386746  | 0.698527091 | 0.698527091 | -5.555454696 |
| 1439687_at   | 0.029462509  | 8.689797113 | 0.399347309  | 0.698555167 | 0.698555167 | -5.555469644 |
| 1456795_at   | -0.055492253 | 6.44677558  | -0.399315027 | 0.698578148 | 0.698578148 | -5.555481878 |
| 1447507_at   | 0.032397342  | 4.063471901 | 0.39929652   | 0.698591324 | 0.698591324 | -5.555488892 |
| 1456255_at   | -0.03691468  | 7.404912506 | -0.399288865 | 0.698596774 | 0.698596774 | -5.555491792 |
| 1435014_at   | 0.043943199  | 5.450522042 | 0.399256605  | 0.698619741 | 0.698619741 | -5.555504017 |
| 1429497_s_at | 0.036724228  | 9.709844382 | 0.399252181  | 0.69862289  | 0.69862289  | -5.555505693 |
| 1422374_s_at | 0.038217079  | 3.99640505  | 0.399235597  | 0.698634697 | 0.698634697 | -5.555511977 |
| 1423474_at   | 0.029235623  | 11.04902275 | 0.399159223  | 0.698689072 | 0.698689072 | -5.555540913 |
| 1440786_x_at | 0.038715674  | 3.341432197 | 0.399158295  | 0.698689733 | 0.698689733 | -5.555541265 |
| 1423033_at   | -0.086608497 | 6.360182744 | -0.399149037 | 0.698696324 | 0.698696324 | -5.555544772 |
| 1423314_s_at | 0.024069599  | 8.514804599 | 0.399111846  | 0.698722804 | 0.698722804 | -5.55555886  |
| 1425299_s_at | 0.028450738  | 11.64041924 | 0.399102972  | 0.698729122 | 0.698729122 | -5.555562222 |
| 1422838_at   | 0.040375735  | 4.88659408  | 0.399005743  | 0.698798349 | 0.698798349 | -5.555599046 |
| 1444377_at   | -0.03003509  | 6.594615924 | -0.398980436 | 0.698816368 | 0.698816368 | -5.555608629 |
| 1451133_s_at | 0.027831067  | 8.134240045 | 0.398972765  | 0.69882183  | 0.69882183  | -5.555611534 |
| 1443983_at   | 0.030849266  | 6.445876461 | 0.398938096  | 0.698846515 | 0.698846515 | -5.555624662 |
| 1439035_at   | 0.055094174  | 9.173421683 | 0.39887399   | 0.698892162 | 0.698892162 | -5.555648932 |
| 1453530_at   | -0.051463294 | 6.336592125 | -0.398840235 | 0.698916197 | 0.698916197 | -5.555661711 |
| 1453490_at   | 0.0675721    | 5.748996665 | 0.398831728  | 0.698922254 | 0.698922254 | -5.555664931 |
| 1438471_at   | -0.102313989 | 5.879330754 | -0.398752549 | 0.698978637 | 0.698978637 | -5.5556949   |
| 1447208_at   | 0.033438955  | 3.471220125 | 0.398706693  | 0.69901129  | 0.69901129  | -5.555712254 |
| 1445479_at   | 0.035310948  | 3.517455159 | 0.398706522  | 0.699011412 | 0.699011412 | -5.555712319 |
| 1430549_at   | -0.03460196  | 7.824886383 | -0.398667386 | 0.699039282 | 0.699039282 | -5.555727128 |
| 1452363_a_at | -0.050983932 | 8.33887574  | -0.398638416 | 0.699059912 | 0.699059912 | -5.555738089 |
| 1445719_at   | -0.028287464 | 3.802303552 | -0.398627082 | 0.699067983 | 0.699067983 | -5.555742378 |
| 1456338_at   | 0.027173168  | 7.615791839 | 0.398614893  | 0.699076663 | 0.699076663 | -5.555746989 |
| 1432044_a_at | 0.037069462  | 3.412813905 | 0.39858646   | 0.699096912 | 0.699096912 | -5.555757746 |
| 1448949_at   | -0.033960083 | 3.526464465 | -0.398580288 | 0.699101307 | 0.699101307 | -5.555760081 |
| 1452428_a_at | -0.032364555 | 10.74260153 | -0.398537776 | 0.699131582 | 0.699131582 | -5.555776163 |
| 1438056_x_at | -0.034375385 | 7.708888463 | -0.398533254 | 0.699134802 | 0.699134802 | -5.555777873 |
| 1458540_at   | 0.032806007  | 5.118225838 | 0.398507509  | 0.699153137 | 0.699153137 | -5.555787611 |
| 1453963_at   | -0.031165617 | 6.241113377 | -0.398507374 | 0.699153233 | 0.699153233 | -5.555787662 |
| 1426715_s_at | -0.060144346 | 6.282616016 | -0.398491966 | 0.699164207 | 0.699164207 | -5.55579349  |
| 1446885_at   | 0.031227071  | 3.499957012 | 0.398485147  | 0.699169063 | 0.699169063 | -5.555796069 |
| 1460132_at   | 0.029112895  | 5.310155819 | 0.398454351  | 0.699190995 | 0.699190995 | -5.555807717 |
| 1421571_a_at | 0.049334169  | 6.290921316 | 0.398407907  | 0.699224072 | 0.699224072 | -5.55582528  |

|              |              |             |              |             |             |              |
|--------------|--------------|-------------|--------------|-------------|-------------|--------------|
| 1416886_at   | 0.064896387  | 5.637826234 | 0.398403239  | 0.699227397 | 0.699227397 | -5.555827045 |
| 1441741_at   | -0.025377339 | 3.22302064  | -0.398392582 | 0.699234987 | 0.699234987 | -5.555831075 |
| 1445932_at   | -0.033330428 | 5.896246812 | -0.398362596 | 0.699256343 | 0.699256343 | -5.555842414 |
| 1423623_at   | -0.044046762 | 7.242107045 | -0.398352668 | 0.699263414 | 0.699263414 | -5.555846167 |
| 1433954_at   | -0.025266658 | 9.11624478  | -0.39826642  | 0.699324842 | 0.699324842 | -5.555878774 |
| 1429585_s_at | 0.026791514  | 7.668571391 | 0.398256368  | 0.699332001 | 0.699332001 | -5.555882574 |
| 1424247_at   | 0.034688898  | 7.926654159 | 0.398245011  | 0.699340091 | 0.699340091 | -5.555886867 |
| 1418150_at   | 0.029426781  | 7.4922253   | 0.398241062  | 0.699342904 | 0.699342904 | -5.55588836  |
| 1457239_at   | -0.04593033  | 4.337713548 | -0.398216965 | 0.699360067 | 0.699360067 | -5.555897468 |
| 1457362_at   | -0.035293134 | 6.269156022 | -0.398174634 | 0.699390218 | 0.699390218 | -5.555913468 |
| 1430826_s_at | 0.048280932  | 4.694744696 | 0.398140394  | 0.699414606 | 0.699414606 | -5.555926407 |
| 1443599_at   | 0.030655534  | 4.248435493 | 0.398127811  | 0.699423568 | 0.699423568 | -5.555931162 |
| 1437440_at   | 0.040154357  | 3.37299497  | 0.398069645  | 0.699465    | 0.699465    | -5.555953141 |
| 1454558_at   | -0.032769202 | 5.352519267 | -0.398046    | 0.699481843 | 0.699481843 | -5.555962075 |
| 1417761_at   | -0.028008979 | 4.197566459 | -0.397996246 | 0.699517283 | 0.699517283 | -5.555980872 |
| 1437371_at   | 0.042729674  | 5.54031129  | 0.397987074  | 0.699523817 | 0.699523817 | -5.555984337 |
| 1420446_at   | 0.03349979   | 4.705694218 | 0.397896461  | 0.699588364 | 0.699588364 | -5.556018563 |
| 1460363_at   | -0.027050192 | 9.156016158 | -0.397819282 | 0.699643344 | 0.699643344 | -5.55604771  |
| 1422207_at   | -0.029880081 | 4.383618853 | -0.397815726 | 0.699645877 | 0.699645877 | -5.556049053 |
| 1449372_at   | -0.042151271 | 8.918122367 | -0.397787206 | 0.699666195 | 0.699666195 | -5.556059822 |
| 1453850_at   | 0.033081997  | 3.514948951 | 0.397765582  | 0.699681599 | 0.699681599 | -5.556067986 |
| 1442292_at   | 0.027097065  | 3.792757636 | 0.397735474  | 0.699703049 | 0.699703049 | -5.556079354 |
| 1417171_at   | -0.027394571 | 3.578602724 | -0.397642937 | 0.699768974 | 0.699768974 | -5.556114286 |
| 1418660_at   | -0.035029437 | 8.116563808 | -0.397629113 | 0.699778822 | 0.699778822 | -5.556119503 |
| 1460711_at   | 0.034965508  | 7.897927043 | 0.39762378   | 0.699782622 | 0.699782622 | -5.556121516 |
| 1420632_a_at | -0.026365299 | 7.793653346 | -0.397620848 | 0.699784711 | 0.699784711 | -5.556122623 |
| 1432028_at   | 0.030896945  | 3.593355116 | 0.397599062  | 0.699800233 | 0.699800233 | -5.556130845 |
| 1432768_at   | -0.026129699 | 3.623387247 | -0.397566005 | 0.699823784 | 0.699823784 | -5.556143321 |
| 1435280_at   | 0.032160764  | 6.888324209 | 0.397545167  | 0.69983863  | 0.69983863  | -5.556151185 |
| 1439915_at   | 0.039273324  | 8.603584519 | 0.397461347  | 0.69989835  | 0.69989835  | -5.556182812 |
| 1445610_at   | 0.031116622  | 3.510090494 | 0.397458174  | 0.699900611 | 0.699900611 | -5.556184009 |
| 1448446_at   | -0.032729974 | 8.266025617 | -0.397447977 | 0.699907876 | 0.699907876 | -5.556187856 |
| 1429934_at   | -0.032842182 | 3.614361466 | -0.397427142 | 0.699922721 | 0.699922721 | -5.556195716 |
| 1416365_at   | 0.037021537  | 12.25922026 | 0.397391434  | 0.699948163 | 0.699948163 | -5.556209186 |
| 1450569_a_at | -0.04919247  | 8.533284043 | -0.39739022  | 0.699949028 | 0.699949028 | -5.556209644 |
| 1429482_at   | -0.027312737 | 3.33298764  | -0.397390201 | 0.699949042 | 0.699949042 | -5.556209652 |
| 1415704_a_at | -0.035121049 | 10.89756276 | -0.397332659 | 0.699990042 | 0.699990042 | -5.556231356 |
| 1451768_a_at | -0.041153702 | 7.815183167 | -0.397280551 | 0.700027171 | 0.700027171 | -5.556251008 |
| 1426378_at   | -0.0290138   | 11.21671585 | -0.397279272 | 0.700028083 | 0.700028083 | -5.556251491 |
| 1432371_a_at | -0.033835234 | 3.329161617 | -0.397272574 | 0.700032855 | 0.700032855 | -5.556254016 |
| 1418962_at   | 0.026368552  | 8.305278494 | 0.397183911  | 0.700096033 | 0.700096033 | -5.556287449 |
| 1434031_at   | -0.030890797 | 8.56002412  | -0.397140646 | 0.700126863 | 0.700126863 | -5.55630376  |
| 1430336_at   | 0.029488776  | 3.418437231 | 0.397122277  | 0.700139953 | 0.700139953 | -5.556310685 |
| 1450590_at   | -0.030442296 | 4.222401387 | -0.39705693  | 0.700186519 | 0.700186519 | -5.556335317 |
| 1439233_at   | -0.041756123 | 6.869233859 | -0.397041915 | 0.700197219 | 0.700197219 | -5.556340976 |
| 1454234_at   | -0.043181416 | 4.939941722 | -0.39698229  | 0.70023971  | 0.70023971  | -5.556363447 |
| 1427879_at   | 0.030186921  | 8.561929695 | 0.396945255  | 0.700266103 | 0.700266103 | -5.556377403 |
| 1456140_at   | -0.032033385 | 3.559051216 | -0.396901271 | 0.700297448 | 0.700297448 | -5.556393976 |
| 1434811_at   | -0.039748778 | 3.537521107 | -0.396832714 | 0.700346307 | 0.700346307 | -5.556419804 |
| 1428171_at   | 0.03223122   | 9.026482663 | 0.396772438  | 0.700389265 | 0.700389265 | -5.556442509 |
| 1441234_at   | -0.035819409 | 4.121037983 | -0.396756806 | 0.700400406 | 0.700400406 | -5.556448397 |
| 1449279_at   | -0.032926483 | 5.518139958 | -0.396752789 | 0.700403269 | 0.700403269 | -5.55644991  |
| 1441023_at   | 0.040451077  | 7.36071088  | 0.396744334  | 0.700409295 | 0.700409295 | -5.556453094 |



|              |              |             |              |             |             |              |
|--------------|--------------|-------------|--------------|-------------|-------------|--------------|
| 1415715_at   | -0.028998559 | 7.895564729 | -0.396709335 | 0.70043424  | 0.70043424  | -5.556466275 |
| 1456160_at   | -0.040637912 | 8.580608196 | -0.396692354 | 0.700446342 | 0.700446342 | -5.55647267  |
| 1416237_at   | 0.109914561  | 6.85356201  | 0.396624435  | 0.700494751 | 0.700494751 | -5.556498245 |
| 1431188_a_at | -0.026944535 | 7.747493832 | -0.396621421 | 0.700496899 | 0.700496899 | -5.55649938  |
| 1457240_at   | 0.028325494  | 5.915905397 | 0.396592575  | 0.700517459 | 0.700517459 | -5.55651024  |
| 1431092_at   | -0.03478563  | 6.444520459 | -0.396566955 | 0.70053572  | 0.70053572  | -5.556519886 |
| 1438542_at   | -0.057205848 | 4.395101184 | -0.396509624 | 0.700576584 | 0.700576584 | -5.556541467 |
| 1434529_x_at | 0.030014682  | 7.463336255 | 0.396472048  | 0.700603368 | 0.700603368 | -5.556555611 |
| 1429101_at   | -0.043507377 | 5.108395519 | -0.396466289 | 0.700607473 | 0.700607473 | -5.556557778 |
| 1436428_at   | -0.034299658 | 4.361508911 | -0.396393934 | 0.700659049 | 0.700659049 | -5.556585009 |
| 1426662_at   | -0.024642118 | 9.918065288 | -0.396391167 | 0.700661021 | 0.700661021 | -5.55658605  |
| 1436349_at   | 0.025137606  | 11.16727633 | 0.396333856  | 0.700701874 | 0.700701874 | -5.556607615 |
| 1418268_at   | -0.038219405 | 5.974459497 | -0.396322314 | 0.700710101 | 0.700710101 | -5.556611958 |
| 1422545_at   | 0.058800674  | 8.021657452 | 0.396317727  | 0.700713371 | 0.700713371 | -5.556613683 |
| 1454471_at   | -0.026304584 | 3.259070172 | -0.396290954 | 0.700732456 | 0.700732456 | -5.556623756 |
| 1451199_at   | 0.047924104  | 7.856256709 | 0.39621758   | 0.700784762 | 0.700784762 | -5.556651358 |
| 1418204_s_at | 0.051142008  | 5.364997381 | 0.396206503  | 0.700792658 | 0.700792658 | -5.556655524 |
| 1425235_s_at | 0.029928681  | 5.966062296 | 0.396097935  | 0.700870056 | 0.700870056 | -5.556696356 |
| 1423320_at   | -0.035046431 | 4.497551346 | -0.396071741 | 0.70088873  | 0.70088873  | -5.556706205 |
| 1429158_at   | 0.027710811  | 7.956929596 | 0.395988994  | 0.700947723 | 0.700947723 | -5.556737316 |
| 1436882_at   | 0.048024512  | 4.699761901 | 0.395981432  | 0.700953114 | 0.700953114 | -5.556740159 |
| 1450279_at   | -0.037846438 | 6.230582856 | -0.395973045 | 0.700959094 | 0.700959094 | -5.556743312 |
| 1421445_at   | 0.034260317  | 3.53602459  | 0.395962024  | 0.700966952 | 0.700966952 | -5.556747455 |
| 1455293_at   | 0.031732912  | 8.416417754 | 0.395956964  | 0.700970559 | 0.700970559 | -5.556749357 |
| 1417672_at   | -0.03303492  | 3.587563101 | -0.395954241 | 0.7009725   | 0.7009725   | -5.556750381 |
| 1433309_at   | 0.030891428  | 3.718636553 | 0.395948482  | 0.700976606 | 0.700976606 | -5.556752545 |
| 1416693_at   | -0.08142146  | 6.585709817 | -0.3959432   | 0.700980372 | 0.700980372 | -5.556754531 |
| 1447047_at   | 0.173338152  | 5.553342096 | 0.395925508  | 0.700992986 | 0.700992986 | -5.556761181 |
| 1430043_at   | 0.038106711  | 7.886643217 | 0.395915956  | 0.700999796 | 0.700999796 | -5.556764771 |
| 1458058_at   | -0.033276762 | 5.550848706 | -0.395885692 | 0.701021373 | 0.701021373 | -5.556776146 |
| 1428271_at   | -0.041491249 | 6.476058405 | -0.395878923 | 0.7010262   | 0.7010262   | -5.55677869  |
| 1455950_x_at | 0.027453296  | 13.15298615 | 0.395876202  | 0.701028139 | 0.701028139 | -5.556779713 |
| 1418196_at   | -0.033541302 | 7.640042535 | -0.39586466  | 0.701036369 | 0.701036369 | -5.556784051 |
| 1433534_a_at | 0.057016622  | 10.56813391 | 0.395814236  | 0.70107232  | 0.70107232  | -5.556803    |
| 1425954_a_at | -0.042941394 | 6.329116997 | -0.395664224 | 0.701179282 | 0.701179282 | -5.556859361 |
| 1455563_at   | 0.036138383  | 7.977536475 | 0.395663429  | 0.701179849 | 0.701179849 | -5.55685966  |
| 1438168_x_at | -0.042017145 | 10.08829102 | -0.395614821 | 0.701214509 | 0.701214509 | -5.556877918 |
| 1427002_s_at | 0.030336675  | 4.147741555 | 0.39560039   | 0.7012248   | 0.7012248   | -5.556883338 |
| 1429283_at   | 0.072526781  | 6.832296645 | 0.395513469  | 0.701286781 | 0.701286781 | -5.556915981 |
| 1444903_at   | -0.031838251 | 4.23625815  | -0.39547441  | 0.701314634 | 0.701314634 | -5.556930647 |
| 1429485_a_at | 0.025879737  | 9.773759579 | 0.395425767  | 0.701349322 | 0.701349322 | -5.55694891  |
| 1446418_at   | 0.031169551  | 6.074115683 | 0.395387116  | 0.701376885 | 0.701376885 | -5.556963419 |
| 1415863_at   | 0.034432562  | 12.14196957 | 0.395372633  | 0.701387213 | 0.701387213 | -5.556968856 |
| 1454429_at   | -0.030459463 | 5.02600198  | -0.395351749 | 0.701402106 | 0.701402106 | -5.556976695 |
| 1444899_at   | 0.045384668  | 3.809097087 | 0.395347068  | 0.701405444 | 0.701405444 | -5.556978452 |
| 1438025_at   | 0.040238767  | 7.867436277 | 0.395343888  | 0.701407712 | 0.701407712 | -5.556979646 |
| 1429958_x_at | 0.032003747  | 7.757597108 | 0.395341779  | 0.701409216 | 0.701409216 | -5.556980437 |
| 1425203_at   | -0.038232811 | 5.632574293 | -0.395313751 | 0.701429204 | 0.701429204 | -5.556990957 |
| 1426373_at   | -0.043861398 | 9.907774918 | -0.395306342 | 0.701434488 | 0.701434488 | -5.556993738 |
| 1438306_at   | 0.045905885  | 6.47225518  | 0.395270766  | 0.701459859 | 0.701459859 | -5.557007089 |
| 1451174_at   | -0.048637057 | 7.271439026 | -0.395248657 | 0.701475627 | 0.701475627 | -5.557015386 |
| 1421513_at   | -0.034703078 | 4.264201704 | -0.39522587  | 0.701491878 | 0.701491878 | -5.557023937 |
| 1442551_at   | 0.03533409   | 3.321375309 | 0.395183235  | 0.701522284 | 0.701522284 | -5.557039935 |

|              |              |             |              |             |             |              |
|--------------|--------------|-------------|--------------|-------------|-------------|--------------|
| 1441307_at   | -0.028785581 | 3.58045978  | -0.395181565 | 0.701523476 | 0.701523476 | -5.557040561 |
| 1445215_at   | -0.05244277  | 4.744622165 | -0.395173183 | 0.701529454 | 0.701529454 | -5.557043706 |
| 1439219_at   | -0.035374228 | 3.672129051 | -0.395167179 | 0.701533735 | 0.701533735 | -5.557045959 |
| 1437503_a_at | -0.038440696 | 10.37948598 | -0.395140058 | 0.701553079 | 0.701553079 | -5.557056134 |
| 1436120_at   | -0.030519911 | 7.574576454 | -0.395132714 | 0.701558316 | 0.701558316 | -5.557058889 |
| 1453247_at   | 0.035704634  | 8.669795517 | 0.395082155  | 0.701594376 | 0.701594376 | -5.557077856 |
| 1416342_at   | -0.047055293 | 10.90598447 | -0.39503533  | 0.701627773 | 0.701627773 | -5.557095419 |
| 1424407_s_at | -0.026124634 | 9.914239747 | -0.39502558  | 0.701634726 | 0.701634726 | -5.557099076 |
| 1447488_at   | 0.038178063  | 4.403290626 | 0.395014836  | 0.70164239  | 0.70164239  | -5.557103105 |
| 1455699_at   | -0.036671646 | 5.490558403 | -0.395011232 | 0.70164496  | 0.70164496  | -5.557104457 |
| 1450991_at   | 0.02666187   | 3.754932436 | 0.395004935  | 0.701649452 | 0.701649452 | -5.557106819 |
| 1452026_a_at | -0.03194456  | 6.930407597 | -0.394989028 | 0.701660797 | 0.701660797 | -5.557112784 |
| 1435911_s_at | -0.057118091 | 6.649094837 | -0.3948769   | 0.701740775 | 0.701740775 | -5.557154829 |
| 1433861_at   | -0.034711244 | 7.630310662 | -0.394838974 | 0.701767827 | 0.701767827 | -5.557169048 |
| 1459981_s_at | -0.048218689 | 7.516543645 | -0.394802122 | 0.701794114 | 0.701794114 | -5.557182862 |
| 1438282_at   | 0.0576545    | 3.875860063 | 0.3947957    | 0.701798694 | 0.701798694 | -5.55718527  |
| 1439636_at   | -0.027108058 | 3.260231067 | -0.394775561 | 0.70181306  | 0.70181306  | -5.557192819 |
| 1433060_at   | 0.048563729  | 4.454458355 | 0.39476008   | 0.701824103 | 0.701824103 | -5.557198621 |
| 1432617_at   | -0.030250136 | 3.675732603 | -0.394746514 | 0.70183378  | 0.70183378  | -5.557203706 |
| 1423507_a_at | -0.0361081   | 9.18086197  | -0.394730342 | 0.701845315 | 0.701845315 | -5.557209767 |
| 1426457_at   | 0.025912279  | 9.679202079 | 0.394691617  | 0.70187294  | 0.70187294  | -5.55722428  |
| 1440432_at   | 0.032060076  | 4.852726732 | 0.394543919  | 0.701978302 | 0.701978302 | -5.55727962  |
| 1428349_s_at | 0.062229081  | 7.853668305 | 0.394509107  | 0.702003137 | 0.702003137 | -5.557292661 |
| 1449674_s_at | -0.029006839 | 8.770664289 | -0.394449621 | 0.702045575 | 0.702045575 | -5.557314942 |
| 1446373_at   | -0.036800722 | 3.415329931 | -0.394415454 | 0.70206995  | 0.70206995  | -5.557327738 |
| 1431202_at   | -0.058423132 | 5.466707168 | -0.394378024 | 0.702096654 | 0.702096654 | -5.557341755 |
| 1454043_a_at | -0.042208824 | 3.891019673 | -0.394373944 | 0.702099565 | 0.702099565 | -5.557343282 |
| 1417825_at   | 0.037538832  | 11.34738874 | 0.394360728  | 0.702108994 | 0.702108994 | -5.557348231 |
| 1423134_at   | -0.024490364 | 9.186625691 | -0.394351175 | 0.70211581  | 0.70211581  | -5.557351808 |
| 1448976_at   | 0.028169371  | 8.399573869 | 0.394342205  | 0.702122209 | 0.702122209 | -5.557355167 |
| 1422345_s_at | -0.039213719 | 4.515299445 | -0.394326464 | 0.702133439 | 0.702133439 | -5.557361061 |
| 1448673_at   | 0.047415469  | 9.621827494 | 0.394324514  | 0.702134831 | 0.702134831 | -5.557361791 |
| 1447126_at   | -0.036584108 | 4.663316427 | -0.394275189 | 0.702170022 | 0.702170022 | -5.557380258 |
| 1457657_at   | 0.043597059  | 3.722832026 | 0.394259551  | 0.70218118  | 0.70218118  | -5.557386112 |
| 1434042_s_at | -0.024629635 | 9.684213691 | -0.394205085 | 0.70222004  | 0.70222004  | -5.5574065   |
| 1447470_at   | 0.031286167  | 4.8113612   | 0.394196313  | 0.702226299 | 0.702226299 | -5.557409784 |
| 1450548_at   | 0.030183988  | 4.371053094 | 0.39415893   | 0.702252972 | 0.702252972 | -5.557423776 |
| 1431019_at   | 0.028176646  | 4.225818567 | 0.394122065  | 0.702279275 | 0.702279275 | -5.557437572 |
| 1449246_at   | -0.032415432 | 6.646426962 | -0.394106905 | 0.702290092 | 0.702290092 | -5.557443246 |
| 1460121_at   | -0.026023664 | 11.2323964  | -0.394067803 | 0.702317992 | 0.702317992 | -5.557457877 |
| 1459278_at   | -0.042948646 | 6.236675802 | -0.394016291 | 0.702354748 | 0.702354748 | -5.557477151 |
| 1415816_at   | 0.025253571  | 11.2581517  | 0.393979079  | 0.702381302 | 0.702381302 | -5.557491073 |
| 1451271_a_at | 0.027303317  | 10.56564146 | 0.393971522  | 0.702386693 | 0.702386693 | -5.5574939   |
| 1429033_at   | -0.024753747 | 6.537540713 | -0.393949871 | 0.702402143 | 0.702402143 | -5.557501999 |
| 1450273_at   | 0.037209757  | 5.76911128  | 0.393897656  | 0.702439403 | 0.702439403 | -5.55752153  |
| 1437362_at   | 0.03073234   | 7.618933677 | 0.393886786  | 0.702447159 | 0.702447159 | -5.557525595 |
| 1433220_at   | -0.02712693  | 5.044060827 | -0.393884252 | 0.702448967 | 0.702448967 | -5.557526543 |
| 1430245_at   | 0.026489298  | 6.311577626 | 0.393819423  | 0.702495229 | 0.702495229 | -5.557550788 |
| 1434271_at   | 0.03811458   | 7.612023935 | 0.393693105  | 0.702585374 | 0.702585374 | -5.557598018 |
| 1428193_at   | -0.043252107 | 8.166994698 | -0.393667662 | 0.702603531 | 0.702603531 | -5.557607529 |
| 1424265_at   | 0.058160203  | 7.218389176 | 0.393642127  | 0.702621754 | 0.702621754 | -5.557617075 |
| 1447896_s_at | 0.024347281  | 12.53652666 | 0.393638257  | 0.702624517 | 0.702624517 | -5.557618521 |
| 1449652_at   | -0.042130985 | 4.96679556  | -0.393584151 | 0.70266313  | 0.70266313  | -5.557638744 |

|              |              |             |              |             |             |              |
|--------------|--------------|-------------|--------------|-------------|-------------|--------------|
| 1427062_at   | -0.026190027 | 8.134620669 | -0.393576305 | 0.70266873  | 0.70266873  | -5.557641676 |
| 1416196_at   | 0.044902204  | 3.67860707  | 0.393559549  | 0.702680688 | 0.702680688 | -5.557647938 |
| 1447662_x_at | 0.043474815  | 3.780196352 | 0.39354922   | 0.70268806  | 0.70268806  | -5.557651798 |
| 1423803_s_at | 0.031280971  | 10.60841216 | 0.393522165  | 0.70270737  | 0.70270737  | -5.557661909 |
| 1440524_at   | -0.038188272 | 5.191874421 | -0.393505802 | 0.702719047 | 0.702719047 | -5.557668023 |
| 1432900_at   | -0.028743101 | 5.34877587  | -0.393493385 | 0.702727909 | 0.702727909 | -5.557672663 |
| 1440311_at   | 0.046770497  | 4.922360986 | 0.393472882  | 0.702742543 | 0.702742543 | -5.557680324 |
| 1439596_at   | -0.046466315 | 4.289837775 | -0.393428111 | 0.702774497 | 0.702774497 | -5.557697051 |
| 1421884_at   | 0.044751646  | 6.694084171 | 0.393381222  | 0.702807963 | 0.702807963 | -5.557714568 |
| 1449100_at   | -0.033054458 | 7.046846844 | -0.393361624 | 0.702821951 | 0.702821951 | -5.557721888 |
| 1441808_at   | -0.028228049 | 5.532265419 | -0.39335341  | 0.702827814 | 0.702827814 | -5.557724956 |
| 1448361_at   | -0.031450005 | 11.61729038 | -0.393339323 | 0.702837869 | 0.702837869 | -5.557730218 |
| 1415823_at   | 0.032139809  | 11.26000255 | 0.393328385  | 0.702845676 | 0.702845676 | -5.557734304 |
| 1444043_at   | 0.041608158  | 7.449740319 | 0.393320849  | 0.702851055 | 0.702851055 | -5.557737118 |
| 1416716_at   | -0.037232763 | 9.312173777 | -0.393314918 | 0.702855288 | 0.702855288 | -5.557739334 |
| 1445415_at   | -0.043472833 | 3.436895047 | -0.393305682 | 0.70286188  | 0.70286188  | -5.557742783 |
| 1438193_at   | -0.031299648 | 4.080279537 | -0.393242662 | 0.702906863 | 0.702906863 | -5.557766318 |
| 1429076_a_at | -0.030908532 | 4.329707685 | -0.393239    | 0.702909477 | 0.702909477 | -5.557767686 |
| 1416284_at   | 0.024645927  | 9.659109052 | 0.393235774  | 0.70291178  | 0.70291178  | -5.557768891 |
| 1452069_a_at | 0.029996888  | 7.90740683  | 0.393224035  | 0.702920159 | 0.702920159 | -5.557773274 |
| 1453562_a_at | 0.024876671  | 7.802370553 | 0.393116843  | 0.702996673 | 0.702996673 | -5.557813295 |
| 1423300_at   | 0.033203751  | 8.173673341 | 0.393100393  | 0.703008416 | 0.703008416 | -5.557819436 |
| 1447320_x_at | 0.031278813  | 10.45225048 | 0.393098764  | 0.703009579 | 0.703009579 | -5.557820044 |
| 1442302_at   | 0.025228184  | 5.808872107 | 0.393021654  | 0.703064623 | 0.703064623 | -5.557848826 |
| 1431423_a_at | 0.025772695  | 9.99422259  | 0.392922964  | 0.703135074 | 0.703135074 | -5.557885655 |
| 1453355_at   | 0.031348245  | 6.893384512 | 0.392888623  | 0.70315959  | 0.70315959  | -5.557898468 |
| 1439703_at   | 0.031566216  | 3.269013776 | 0.392888379  | 0.703159764 | 0.703159764 | -5.55789856  |
| 1456953_at   | -0.057820366 | 4.307287377 | -0.39285872  | 0.703180938 | 0.703180938 | -5.557909625 |
| 1442419_at   | 0.037145371  | 3.761714281 | 0.392841233  | 0.703193422 | 0.703193422 | -5.557916149 |
| 1415907_at   | -0.049214567 | 10.69350091 | -0.392838537 | 0.703195346 | 0.703195346 | -5.557917154 |
| 1421396_at   | -0.040471005 | 4.762658379 | -0.392797731 | 0.703224478 | 0.703224478 | -5.557932377 |
| 1446193_at   | 0.060618979  | 3.93450736  | 0.392796753  | 0.703225177 | 0.703225177 | -5.557932742 |
| 1448334_a_at | 0.059108341  | 10.25862163 | 0.39277203   | 0.703242827 | 0.703242827 | -5.557941963 |
| 1454796_at   | -0.042877148 | 5.511243218 | -0.392728042 | 0.703274232 | 0.703274232 | -5.55795837  |
| 1439620_at   | 0.025010518  | 3.138468805 | 0.392726773  | 0.703275138 | 0.703275138 | -5.557958843 |
| 1427088_at   | -0.027509507 | 7.65904075  | -0.392722671 | 0.703278067 | 0.703278067 | -5.557960373 |
| 1436713_s_at | -0.028661194 | 10.61443405 | -0.392668561 | 0.703316698 | 0.703316698 | -5.557980552 |
| 1427265_at   | 0.026194037  | 4.151342105 | 0.39264917   | 0.703330543 | 0.703330543 | -5.557987783 |
| 1437272_at   | -0.038203856 | 3.530763702 | -0.392648672 | 0.703330898 | 0.703330898 | -5.557987968 |
| 1448561_at   | 0.058030593  | 5.749756831 | 0.392618073  | 0.703352745 | 0.703352745 | -5.557999378 |
| 1423645_a_at | 0.031832964  | 10.89552266 | 0.392612555  | 0.703356685 | 0.703356685 | -5.558001435 |
| 1438067_at   | -0.031420917 | 6.591300231 | -0.39249583  | 0.703440026 | 0.703440026 | -5.55804495  |
| 1429941_at   | 0.041416603  | 6.190210471 | 0.39244686   | 0.703474992 | 0.703474992 | -5.558063202 |
| 1429393_at   | -0.028205878 | 7.612759722 | -0.392409728 | 0.703501506 | 0.703501506 | -5.55807704  |
| 1448400_a_at | 0.046215071  | 10.81461029 | 0.392353548  | 0.703541621 | 0.703541621 | -5.558097975 |
| 1453402_at   | -0.048309959 | 4.018273387 | -0.392332706 | 0.703556503 | 0.703556503 | -5.558105741 |
| 1441039_at   | 0.037780624  | 3.949844027 | 0.392290845  | 0.703586395 | 0.703586395 | -5.558121337 |
| 1416144_a_at | 0.046905132  | 10.86846157 | 0.392281436  | 0.703593113 | 0.703593113 | -5.558124843 |
| 1428742_at   | 0.025988451  | 7.419990237 | 0.392278359  | 0.703595311 | 0.703595311 | -5.558125989 |
| 1434500_at   | 0.070436204  | 6.652675675 | 0.392245111  | 0.703619053 | 0.703619053 | -5.558138375 |
| 1428820_at   | 0.072575667  | 6.659868775 | 0.392226866  | 0.703632081 | 0.703632081 | -5.558145171 |
| 1427998_at   | -0.026548004 | 7.680548064 | -0.392225035 | 0.703633389 | 0.703633389 | -5.558145853 |
| 1458616_at   | 0.025763959  | 7.421382888 | 0.39216764   | 0.703674375 | 0.703674375 | -5.558167231 |

|              |              |             |              |             |             |              |
|--------------|--------------|-------------|--------------|-------------|-------------|--------------|
| 1431549_at   | 0.032703569  | 3.856049367 | 0.392154217  | 0.70368396  | 0.70368396  | -5.55817223  |
| 1443953_at   | -0.028680734 | 4.295935859 | -0.39214859  | 0.703687979 | 0.703687979 | -5.558174326 |
| 1443106_at   | -0.034571316 | 4.225695283 | -0.392101383 | 0.703721691 | 0.703721691 | -5.558191906 |
| 1429972_s_at | 0.024546187  | 5.443157768 | 0.39209418   | 0.703726835 | 0.703726835 | -5.558194588 |
| 1416698_a_at | 0.030250898  | 12.00261346 | 0.391997239  | 0.703796065 | 0.703796065 | -5.558230682 |
| 1421889_a_at | 0.035330708  | 8.970105308 | 0.391983439  | 0.70380592  | 0.70380592  | -5.55823582  |
| 1444039_at   | 0.038810412  | 4.896305971 | 0.391953412  | 0.703827365 | 0.703827365 | -5.558246998 |
| 1421320_a_at | -0.032762156 | 5.591980045 | -0.391945605 | 0.703832941 | 0.703832941 | -5.558249904 |
| 1425139_at   | 0.02474557   | 6.868959878 | 0.391938135  | 0.703838275 | 0.703838275 | -5.558252684 |
| 1455646_at   | -0.033024471 | 7.016784727 | -0.391935674 | 0.703840034 | 0.703840034 | -5.558253601 |
| 1436379_at   | 0.048230907  | 8.631864868 | 0.391929454  | 0.703844475 | 0.703844475 | -5.558255916 |
| 1418526_at   | 0.051128934  | 8.702260583 | 0.391910882  | 0.703857739 | 0.703857739 | -5.558262828 |
| 1417251_at   | 0.03160129   | 6.907782918 | 0.391899024  | 0.703866208 | 0.703866208 | -5.558267242 |
| 1450775_at   | 0.030490481  | 4.30322532  | 0.391783707  | 0.70394857  | 0.70394857  | -5.558310157 |
| 1458713_at   | 0.03635941   | 3.315716823 | 0.391749535  | 0.703972976 | 0.703972976 | -5.558322871 |
| 1445248_at   | -0.065455709 | 5.590659896 | -0.39173094  | 0.703986257 | 0.703986257 | -5.558329789 |
| 1446437_at   | -0.034644747 | 4.296390468 | -0.391726417 | 0.703989488 | 0.703989488 | -5.558331472 |
| 1456310_a_at | 0.04312647   | 8.538470227 | 0.391722023  | 0.703992627 | 0.703992627 | -5.558333107 |
| 1431932_s_at | -0.033634164 | 7.426444268 | -0.391696757 | 0.704010673 | 0.704010673 | -5.558342506 |
| 1457982_at   | -0.033122149 | 5.325101166 | -0.391671233 | 0.704028903 | 0.704028903 | -5.558352001 |
| 1426937_at   | 0.038807364  | 3.857306972 | 0.391603377  | 0.704077371 | 0.704077371 | -5.558377241 |
| 1417368_s_at | 0.024774275  | 10.92072466 | 0.391580922  | 0.704093411 | 0.704093411 | -5.558385592 |
| 1449068_at   | 0.028258208  | 9.462096253 | 0.391573919  | 0.704098413 | 0.704098413 | -5.558388197 |
| 1438635_x_at | -0.039732743 | 8.039636164 | -0.391502684 | 0.704149297 | 0.704149297 | -5.558414687 |
| 1453502_at   | 0.035121903  | 4.905009014 | 0.391450989  | 0.704186224 | 0.704186224 | -5.558433907 |
| 1450469_at   | 0.043813501  | 5.198341133 | 0.391442875  | 0.70419202  | 0.70419202  | -5.558436924 |
| 1434335_at   | 0.037302262  | 9.264915807 | 0.391346835  | 0.704260626 | 0.704260626 | -5.558472625 |
| 1426652_at   | -0.033338226 | 9.183837739 | -0.391252892 | 0.704327737 | 0.704327737 | -5.558507539 |
| 1433054_at   | 0.035660226  | 4.105687601 | 0.391121236  | 0.704421794 | 0.704421794 | -5.558556455 |
| 1416184_s_at | -0.044465252 | 9.783788669 | -0.391079628 | 0.70445152  | 0.70445152  | -5.558571911 |
| 1427074_at   | 0.028073108  | 9.362775244 | 0.391019814  | 0.704494255 | 0.704494255 | -5.558594127 |
| 1460712_s_at | -0.030270659 | 8.583315506 | -0.39101613  | 0.704496887 | 0.704496887 | -5.558595496 |
| 1427013_at   | 0.035154355  | 5.530668754 | 0.390990261  | 0.704515369 | 0.704515369 | -5.558605103 |
| 1453092_at   | 0.02653822   | 4.070531519 | 0.390937136  | 0.704553326 | 0.704553326 | -5.55862483  |
| 1452224_at   | -0.025563812 | 7.960528465 | -0.390906    | 0.704575572 | 0.704575572 | -5.558636391 |
| 1453097_a_at | -0.027735408 | 9.553032674 | -0.390860517 | 0.704608071 | 0.704608071 | -5.558653277 |
| 1421738_at   | -0.028273713 | 4.696890443 | -0.390751182 | 0.704686194 | 0.704686194 | -5.558693862 |
| 1432418_a_at | -0.060116553 | 5.425323054 | -0.390746555 | 0.704689499 | 0.704689499 | -5.558695579 |
| 1416380_at   | 0.033204393  | 6.981510232 | 0.390682139  | 0.704735528 | 0.704735528 | -5.558719485 |
| 1453477_at   | 0.041128371  | 3.918072714 | 0.390680491  | 0.704736706 | 0.704736706 | -5.558720096 |
| 1430631_at   | -0.053514815 | 4.593618688 | -0.39064266  | 0.704763739 | 0.704763739 | -5.558734134 |
| 1430699_at   | 0.027444694  | 4.497461425 | 0.390630899  | 0.704772143 | 0.704772143 | -5.558738498 |
| 1450680_at   | -0.033141136 | 3.737706146 | -0.390623662 | 0.704777314 | 0.704777314 | -5.558741183 |
| 1441070_at   | -0.044138186 | 5.034850809 | -0.390616686 | 0.704782299 | 0.704782299 | -5.558743771 |
| 1449583_at   | 0.032200348  | 7.287757393 | 0.390604599  | 0.704790937 | 0.704790937 | -5.558748256 |
| 1453415_at   | -0.040807313 | 4.342340129 | -0.390570533 | 0.70481528  | 0.70481528  | -5.558760894 |
| 1416299_at   | 0.03954823   | 9.665605535 | 0.390507002  | 0.70486068  | 0.70486068  | -5.558784461 |
| 1448917_at   | 0.026575935  | 10.01737105 | 0.390421861  | 0.704921524 | 0.704921524 | -5.558816038 |
| 1433080_at   | 0.029028148  | 5.440406985 | 0.390413364  | 0.704927597 | 0.704927597 | -5.55881919  |
| 1423012_at   | -0.030908879 | 4.281061102 | -0.390410167 | 0.704929881 | 0.704929881 | -5.558820375 |
| 1460244_at   | -0.041223298 | 4.846251633 | -0.390301961 | 0.705007212 | 0.705007212 | -5.558860496 |
| 1433014_at   | -0.029743579 | 3.397537751 | -0.390301532 | 0.705007519 | 0.705007519 | -5.558860655 |
| 1441733_s_at | 0.030908972  | 7.345939062 | 0.390235371  | 0.705054804 | 0.705054804 | -5.558885182 |

|                 |              |             |              |             |             |              |
|-----------------|--------------|-------------|--------------|-------------|-------------|--------------|
| 1432665_at      | -0.036077317 | 4.337986533 | -0.390204391 | 0.705076946 | 0.705076946 | -5.558896664 |
| 1449339_at      | 0.030420468  | 6.73810467  | 0.390192476  | 0.705085461 | 0.705085461 | -5.55890108  |
| 1423401_at      | 0.037966657  | 6.060865856 | 0.390179017  | 0.705095081 | 0.705095081 | -5.558906069 |
| 1444770_at      | -0.030829582 | 4.422835746 | -0.390166607 | 0.705103951 | 0.705103951 | -5.558910668 |
| 1439602_at      | -0.035586241 | 3.634470822 | -0.390146421 | 0.705118378 | 0.705118378 | -5.558918149 |
| 1431984_at      | -0.030263589 | 3.62998651  | -0.390092193 | 0.705157136 | 0.705157136 | -5.558938244 |
| 1454993_a_at    | 0.033377176  | 10.67170112 | 0.390035419  | 0.705197716 | 0.705197716 | -5.55895928  |
| 1435835_at      | -0.034439017 | 7.618460219 | -0.390028553 | 0.705202624 | 0.705202624 | -5.558961824 |
| 1422809_at      | 0.115408116  | 4.882359325 | 0.390017627  | 0.705210433 | 0.705210433 | -5.558965872 |
| 1448603_at      | 0.032353105  | 7.824370551 | 0.390011706  | 0.705214666 | 0.705214666 | -5.558968065 |
| 1416938_at      | 0.024198567  | 10.07311348 | 0.389974273  | 0.705241422 | 0.705241422 | -5.558981932 |
| 1449211_at      | -0.043162318 | 7.219162321 | -0.389930207 | 0.705272919 | 0.705272919 | -5.558998255 |
| 1450784_at      | -0.034949372 | 9.786977194 | -0.389919019 | 0.705280917 | 0.705280917 | -5.559002399 |
| 1430522_a_at    | -0.028676778 | 7.025008098 | -0.389839261 | 0.705337929 | 0.705337929 | -5.559031937 |
| 1459987_s_at    | -0.024688387 | 10.9865153  | -0.389778498 | 0.705381364 | 0.705381364 | -5.559054437 |
| 1422092_at      | 0.044267683  | 3.840964433 | 0.38976844   | 0.705388554 | 0.705388554 | -5.559058161 |
| 1434102_at      | 0.035021596  | 9.976949875 | 0.38966744   | 0.705460754 | 0.705460754 | -5.55909555  |
| 1430178_at      | 0.052793148  | 5.540021121 | 0.389582024  | 0.705521818 | 0.705521818 | -5.559127165 |
| 1435563_at      | 0.038830731  | 7.250689642 | 0.389581829  | 0.705521957 | 0.705521957 | -5.559127237 |
| 1423835_at      | 0.050818146  | 9.94661535  | 0.38955194   | 0.705543324 | 0.705543324 | -5.559138297 |
| 1451842_a_at    | -0.031363658 | 4.711103415 | -0.389531199 | 0.705558152 | 0.705558152 | -5.559145972 |
| 1456000_at      | 0.032102635  | 6.851618055 | 0.38950513   | 0.705576789 | 0.705576789 | -5.559155618 |
| 1436952_at      | -0.034278083 | 5.663089354 | -0.389446259 | 0.705618878 | 0.705618878 | -5.559177399 |
| 1440500_at      | 0.028227579  | 6.831518993 | 0.389435249  | 0.70562675  | 0.70562675  | -5.559181472 |
| 1446712_at      | -0.026972744 | 5.370487242 | -0.389417415 | 0.7056395   | 0.7056395   | -5.55918807  |
| 1454347_at      | 0.032229623  | 3.751583272 | 0.389369805  | 0.70567354  | 0.70567354  | -5.559205681 |
| 1428555_at      | -0.023722786 | 9.367586251 | -0.389368922 | 0.705674171 | 0.705674171 | -5.559206007 |
| 1453258_at      | -0.030930277 | 4.915123104 | -0.389359592 | 0.705680841 | 0.705680841 | -5.559209458 |
| 1436188_a_at    | 0.034526156  | 8.634083725 | 0.389348844  | 0.705688526 | 0.705688526 | -5.559213434 |
| 1441817_at      | 0.042100193  | 3.169208218 | 0.389347596  | 0.705689419 | 0.705689419 | -5.559213895 |
| 1446004_at      | -0.031275394 | 4.72328199  | -0.389330714 | 0.705701488 | 0.705701488 | -5.559220139 |
| AFFX-TrpnX-M_at | -0.031671905 | 3.514951307 | -0.389305559 | 0.705719474 | 0.705719474 | -5.559229442 |
| 1416691_at      | 0.032326433  | 8.084681675 | 0.389285746  | 0.70573364  | 0.70573364  | -5.559236769 |
| 1438232_at      | 0.064549264  | 9.243372101 | 0.389280995  | 0.705737037 | 0.705737037 | -5.559238526 |
| 1434147_at      | -0.026697567 | 5.730143328 | -0.389268803 | 0.705745754 | 0.705745754 | -5.559243035 |
| 1437256_at      | -0.030828699 | 5.403202312 | -0.389221672 | 0.705779453 | 0.705779453 | -5.559260462 |
| 1437405_a_at    | 0.035476869  | 12.62519236 | 0.38920429   | 0.705791881 | 0.705791881 | -5.559266889 |
| 1432847_at      | 0.029170446  | 4.907634039 | 0.389183137  | 0.705807006 | 0.705807006 | -5.55927471  |
| 1454383_at      | 0.03765978   | 3.678355507 | 0.389182557  | 0.705807421 | 0.705807421 | -5.559274924 |
| 1421554_at      | -0.03284232  | 4.427202879 | -0.389178709 | 0.705810172 | 0.705810172 | -5.559276347 |
| 1428014_at      | -0.046552901 | 3.938407887 | -0.389163949 | 0.705820726 | 0.705820726 | -5.559281804 |
| 1432459_a_at    | -0.031746234 | 5.789026375 | -0.389080798 | 0.705880182 | 0.705880182 | -5.559312541 |
| 1458788_at      | -0.070446003 | 6.400433997 | -0.389043077 | 0.705907155 | 0.705907155 | -5.559326482 |
| 1421814_at      | 0.032483807  | 10.23040868 | 0.389030667  | 0.705916029 | 0.705916029 | -5.559331069 |
| 1438706_at      | -0.030576836 | 3.782465879 | -0.389028047 | 0.705917902 | 0.705917902 | -5.559332037 |
| 1434047_x_at    | -0.02651744  | 11.30181957 | -0.388964953 | 0.705963019 | 0.705963019 | -5.559355353 |
| 1446590_at      | -0.046717874 | 3.813231295 | -0.38895439  | 0.705970572 | 0.705970572 | -5.559359256 |
| 1418713_at      | 0.033843004  | 7.234069143 | 0.388945075  | 0.705977234 | 0.705977234 | -5.559362698 |
| 1427301_at      | 0.067247258  | 4.374070333 | 0.388938116  | 0.70598221  | 0.70598221  | -5.559365269 |
| 1453804_a_at    | -0.024190075 | 8.783000175 | -0.388933818 | 0.705985284 | 0.705985284 | -5.559366857 |
| 1450293_at      | 0.044238376  | 3.785503153 | 0.388931082  | 0.70598724  | 0.70598724  | -5.559367868 |
| 1442610_at      | -0.039536594 | 6.045772631 | -0.388901116 | 0.706008669 | 0.706008669 | -5.559378939 |
| 1441691_at      | 0.035533074  | 5.419861591 | 0.388885779  | 0.706019637 | 0.706019637 | -5.559384605 |

|              |              |             |              |             |             |              |
|--------------|--------------|-------------|--------------|-------------|-------------|--------------|
| 1424457_at   | -0.028059225 | 7.666196895 | -0.388879106 | 0.706024409 | 0.706024409 | -5.559387071 |
| 1437940_at   | 0.028862263  | 5.888007942 | 0.388851682  | 0.70604402  | 0.70604402  | -5.559397202 |
| 1419156_at   | 0.041267804  | 9.695914803 | 0.388760266  | 0.706109395 | 0.706109395 | -5.559430967 |
| 1447843_at   | 0.038688871  | 6.02280285  | 0.388754553  | 0.706113481 | 0.706113481 | -5.559433077 |
| 1451542_at   | 0.044563402  | 9.032699157 | 0.388652227  | 0.70618666  | 0.70618666  | -5.559470863 |
| 1433209_at   | -0.029326414 | 7.913754002 | -0.388644345 | 0.706192297 | 0.706192297 | -5.559473773 |
| 1457081_at   | -0.029493034 | 6.563764766 | -0.388592265 | 0.706229545 | 0.706229545 | -5.559493001 |
| 1457750_at   | -0.032851899 | 5.245240608 | -0.388571172 | 0.706244631 | 0.706244631 | -5.559500788 |
| 1429767_at   | 0.039070361  | 6.887554799 | 0.3885553    | 0.706255982 | 0.706255982 | -5.559506647 |
| 1421828_at   | 0.027370647  | 8.131467289 | 0.388536236  | 0.706269617 | 0.706269617 | -5.559513684 |
| 1441584_at   | 0.037338495  | 6.752237844 | 0.388428784  | 0.706346471 | 0.706346471 | -5.559553341 |
| 1439098_at   | -0.037050258 | 3.906111686 | -0.388367157 | 0.70639055  | 0.70639055  | -5.559576081 |
| 1432422_at   | -0.027410686 | 4.966136479 | -0.388359048 | 0.70639635  | 0.70639635  | -5.559579073 |
| 1449411_at   | 0.041731656  | 3.774235077 | 0.388344398  | 0.706406828 | 0.706406828 | -5.559584478 |
| 1420525_a_at | -0.042484239 | 3.326790969 | -0.388328627 | 0.70641811  | 0.70641811  | -5.559590296 |
| 1425061_at   | 0.050004233  | 5.376457964 | 0.388271769  | 0.706458779 | 0.706458779 | -5.559611271 |
| 1429951_at   | -0.042867691 | 9.830064944 | -0.38825867  | 0.706468149 | 0.706468149 | -5.559616103 |
| 1441959_s_at | -0.032224714 | 10.11738585 | -0.388225007 | 0.706492228 | 0.706492228 | -5.559628519 |
| 1430324_x_at | -0.035096724 | 3.901160395 | -0.388218386 | 0.706496964 | 0.706496964 | -5.559630961 |
| 1449032_at   | 0.0284513    | 4.939862006 | 0.388197693  | 0.706511766 | 0.706511766 | -5.559638593 |
| 1426211_at   | -0.042485331 | 6.459231903 | -0.388099828 | 0.706581772 | 0.706581772 | -5.559674682 |
| 1437995_x_at | 0.070632354  | 10.46426172 | 0.388079961  | 0.706595984 | 0.706595984 | -5.559682007 |
| 1428335_a_at | 0.037829611  | 9.524670086 | 0.388056504  | 0.706612765 | 0.706612765 | -5.559690656 |
| 1449714_at   | -0.026006208 | 8.576975983 | -0.387997788 | 0.706654769 | 0.706654769 | -5.559712301 |
| 1453865_a_at | 0.025902003  | 8.419666545 | 0.387914402  | 0.706714422 | 0.706714422 | -5.559743036 |
| 1432007_s_at | 0.037664113  | 8.085629477 | 0.387899301  | 0.706725225 | 0.706725225 | -5.559748602 |
| 1433219_at   | -0.037907307 | 3.66073821  | -0.387894683 | 0.706728529 | 0.706728529 | -5.559750304 |
| 1434814_x_at | 0.029821619  | 10.96659171 | 0.38785371   | 0.706757842 | 0.706757842 | -5.559765402 |
| 1429219_at   | -0.033120107 | 8.409938458 | -0.387837657 | 0.706769327 | 0.706769327 | -5.559771318 |
| 1420037_at   | 0.046258435  | 6.523057768 | 0.38782793   | 0.706776286 | 0.706776286 | -5.559774902 |
| 1443830_x_at | 0.04323252   | 8.09589494  | 0.387770397  | 0.706817447 | 0.706817447 | -5.559796099 |
| 1416373_at   | 0.024530655  | 8.201432724 | 0.38776714   | 0.706819777 | 0.706819777 | -5.559797299 |
| 1453737_at   | -0.04200255  | 5.746218442 | -0.387766566 | 0.706820188 | 0.706820188 | -5.559797511 |
| 1422263_at   | 0.031711062  | 3.963323418 | 0.387737476  | 0.706841    | 0.706841    | -5.559808227 |
| 1446939_at   | 0.042003796  | 4.76978163  | 0.387703522  | 0.706865293 | 0.706865293 | -5.559820735 |
| 1453740_a_at | -0.029131112 | 10.00800174 | -0.387696524 | 0.7068703   | 0.7068703   | -5.559823313 |
| 1441445_at   | 0.057080646  | 4.951711419 | 0.387680022  | 0.706882107 | 0.706882107 | -5.559829391 |
| 1452149_at   | 0.035763097  | 8.946042082 | 0.387637782  | 0.706912329 | 0.706912329 | -5.559844949 |
| 1442334_at   | 0.034611125  | 4.243668904 | 0.38762467   | 0.70692171  | 0.70692171  | -5.559849778 |
| 1454418_at   | 0.034795987  | 6.018289879 | 0.387453053  | 0.707044506 | 0.707044506 | -5.559912968 |
| 1422089_at   | -0.036357465 | 4.439616121 | -0.387428423 | 0.70706213  | 0.70706213  | -5.559922034 |
| 1454199_at   | 0.02953615   | 3.5389304   | 0.387378505  | 0.707097849 | 0.707097849 | -5.559940408 |
| 1416970_a_at | -0.024382339 | 12.51456065 | -0.387377545 | 0.707098536 | 0.707098536 | -5.559940761 |
| 1442028_at   | 0.026334423  | 3.847111849 | 0.387358885  | 0.707111889 | 0.707111889 | -5.559947629 |
| 1452117_a_at | -0.029026819 | 6.889663493 | -0.387347623 | 0.707119947 | 0.707119947 | -5.559951774 |
| 1451054_at   | -0.030398991 | 3.649558803 | -0.387341704 | 0.707124183 | 0.707124183 | -5.559953952 |
| 1453128_at   | -0.073112244 | 6.428567878 | -0.387308162 | 0.707148185 | 0.707148185 | -5.559966296 |
| 1446403_at   | -0.028502865 | 3.597181113 | -0.387297994 | 0.707155461 | 0.707155461 | -5.559970038 |
| 1431229_at   | 0.03440728   | 3.953920352 | 0.387292727  | 0.70715923  | 0.70715923  | -5.559971976 |
| 1442814_at   | -0.026858539 | 4.930586187 | -0.387288156 | 0.707162501 | 0.707162501 | -5.559973658 |
| 1433473_x_at | 0.027586548  | 7.906704437 | 0.387270536  | 0.70717511  | 0.70717511  | -5.559980141 |
| 1459414_at   | 0.023939854  | 7.737101223 | 0.387174344  | 0.707243946 | 0.707243946 | -5.560015532 |
| 1418765_at   | -0.029625466 | 4.423448909 | -0.387081165 | 0.707310629 | 0.707310629 | -5.560049805 |

|              |              |             |              |             |             |              |
|--------------|--------------|-------------|--------------|-------------|-------------|--------------|
| 1435495_at   | -0.043445949 | 3.9733015   | -0.387048038 | 0.707334336 | 0.707334336 | -5.560061988 |
| 1450180_a_at | 0.052306036  | 6.381257598 | 0.387047828  | 0.707334487 | 0.707334487 | -5.560062066 |
| 1441357_at   | -0.0281934   | 4.528556568 | -0.387045231 | 0.707336346 | 0.707336346 | -5.560063021 |
| 1439840_at   | 0.028517753  | 7.555290675 | 0.386954573  | 0.707401228 | 0.707401228 | -5.560096357 |
| 1457304_at   | -0.073812011 | 5.950156086 | -0.386946142 | 0.707407262 | 0.707407262 | -5.560099456 |
| 1435879_at   | 0.026048661  | 8.151095004 | 0.386902892  | 0.707438216 | 0.707438216 | -5.560115357 |
| 1455032_at   | 0.024080833  | 8.848860965 | 0.386887708  | 0.707449083 | 0.707449083 | -5.560120939 |
| 1419803_s_at | 0.029388417  | 9.275626769 | 0.386879822  | 0.707454728 | 0.707454728 | -5.560123838 |
| 1439157_at   | -0.029739898 | 3.418692287 | -0.386852466 | 0.707474306 | 0.707474306 | -5.560133893 |
| 1439787_at   | -0.052314801 | 5.28269964  | -0.386842513 | 0.70748143  | 0.70748143  | -5.560137552 |
| 1446823_at   | 0.037593975  | 3.06392203  | 0.386730016  | 0.70756195  | 0.70756195  | -5.560178896 |
| 1421736_at   | 0.029146747  | 3.597367703 | 0.386703931  | 0.707580621 | 0.707580621 | -5.560188481 |
| 1416979_at   | 0.028784332  | 10.96445851 | 0.386685388  | 0.707593893 | 0.707593893 | -5.560195294 |
| 1419667_at   | 0.035579691  | 7.939895644 | 0.386661917  | 0.707610693 | 0.707610693 | -5.560203918 |
| 1448764_a_at | 0.023018238  | 3.078658361 | 0.386604099  | 0.707652079 | 0.707652079 | -5.560225158 |
| 1453465_x_at | -0.034684302 | 6.297400247 | -0.386554241 | 0.707687768 | 0.707687768 | -5.560243473 |
| 1446734_at   | -0.031817298 | 4.381864274 | -0.386553597 | 0.707688228 | 0.707688228 | -5.560243709 |
| 1420143_at   | -0.027388394 | 6.531559709 | -0.38653598  | 0.707700839 | 0.707700839 | -5.56025018  |
| 1421913_at   | -0.028894637 | 3.305662534 | -0.386534129 | 0.707702164 | 0.707702164 | -5.56025086  |
| 1447459_at   | -0.045011567 | 5.428331258 | -0.386508512 | 0.707720501 | 0.707720501 | -5.560260268 |
| 1455782_at   | -0.029629893 | 3.472582678 | -0.386501429 | 0.707725572 | 0.707725572 | -5.560262869 |
| 1424911_a_at | 0.036150819  | 3.973721095 | 0.386491243  | 0.707732863 | 0.707732863 | -5.56026661  |
| 1419172_at   | 0.031901271  | 8.683234259 | 0.386472591  | 0.707746215 | 0.707746215 | -5.560273459 |
| 1426127_x_at | -0.043696434 | 8.386434259 | -0.386449273 | 0.707762907 | 0.707762907 | -5.560282022 |
| 1428847_a_at | -0.027794353 | 9.691576667 | -0.386404502 | 0.707794956 | 0.707794956 | -5.560298461 |
| 1438670_at   | -0.038928098 | 7.80214665  | -0.386316811 | 0.707857732 | 0.707857732 | -5.560330655 |
| 1441092_at   | -0.027637496 | 5.526593095 | -0.386253384 | 0.707903139 | 0.707903139 | -5.560353936 |
| 1445554_at   | 0.035204893  | 3.30301914  | 0.386218315  | 0.707928245 | 0.707928245 | -5.560366806 |
| 1418973_at   | -0.031598539 | 7.89875836  | -0.386155701 | 0.707973073 | 0.707973073 | -5.560389784 |
| 1454907_at   | 0.033053931  | 6.211332758 | 0.386062481  | 0.708039813 | 0.708039813 | -5.560423985 |
| 1416425_at   | 0.023599125  | 8.790729034 | 0.386037934  | 0.708057388 | 0.708057388 | -5.56043299  |
| 1453117_at   | -0.037548028 | 5.136810318 | -0.386015669 | 0.70807333  | 0.70807333  | -5.560441158 |
| 1458741_at   | 0.043783226  | 3.820511618 | 0.38600945   | 0.708077782 | 0.708077782 | -5.560443439 |
| 1441487_at   | 0.039785964  | 5.08913116  | 0.385995066  | 0.708088081 | 0.708088081 | -5.560448714 |
| 1417282_at   | -0.040336203 | 7.066295579 | -0.385991833 | 0.708090395 | 0.708090395 | -5.5604499   |
| 1456358_at   | 0.024666196  | 6.274257255 | 0.385922649  | 0.708139931 | 0.708139931 | -5.560475274 |
| 1417509_at   | -0.030296101 | 8.17575567  | -0.385873886 | 0.708174846 | 0.708174846 | -5.560493155 |
| 1460634_at   | -0.037861075 | 8.766346863 | -0.385860209 | 0.708184639 | 0.708184639 | -5.56049817  |
| 1458623_at   | -0.032178718 | 5.15632292  | -0.385829579 | 0.708206571 | 0.708206571 | -5.560509401 |
| 1453723_x_at | 0.024629942  | 13.73824216 | 0.385798945  | 0.708228506 | 0.708228506 | -5.560520632 |
| 1455126_x_at | -0.02843716  | 11.07708981 | -0.385791225 | 0.708234034 | 0.708234034 | -5.560523462 |
| 1432848_a_at | 0.042226778  | 7.942158857 | 0.385760925  | 0.70825573  | 0.70825573  | -5.56053457  |
| 1447715_x_at | -0.027494866 | 3.263745914 | -0.38569148  | 0.708305457 | 0.708305457 | -5.560560024 |
| 1435733_x_at | 0.028712208  | 7.664844777 | 0.385656855  | 0.708330252 | 0.708330252 | -5.560572714 |
| 1426171_x_at | -0.032793665 | 3.150728596 | -0.385627089 | 0.708351567 | 0.708351567 | -5.560583622 |
| 1435030_at   | 0.030547397  | 9.06040847  | 0.385621459  | 0.708355599 | 0.708355599 | -5.560585685 |
| 1416317_a_at | -0.034514333 | 6.684760546 | -0.385590475 | 0.708377786 | 0.708377786 | -5.560597039 |
| 1425900_at   | -0.032517345 | 6.1305745   | -0.385548544 | 0.708407813 | 0.708407813 | -5.560612402 |
| 1441893_at   | -0.04203548  | 3.389976379 | -0.385499407 | 0.708443002 | 0.708443002 | -5.560630404 |
| 1457246_at   | 0.036554218  | 8.497041466 | 0.385425752  | 0.708495749 | 0.708495749 | -5.560657384 |
| 1454129_at   | -0.028312686 | 3.512890825 | -0.385407415 | 0.708508881 | 0.708508881 | -5.5606641   |
| 1435825_at   | -0.034433728 | 6.048246798 | -0.385406174 | 0.70850977  | 0.70850977  | -5.560664554 |
| 1449633_s_at | 0.028148597  | 8.159221629 | 0.385397193  | 0.708516202 | 0.708516202 | -5.560667844 |

|              |              |             |              |             |             |              |
|--------------|--------------|-------------|--------------|-------------|-------------|--------------|
| 1428152_a_at | 0.026435364  | 13.71184397 | 0.385382774  | 0.708526528 | 0.708526528 | -5.560673124 |
| 1430132_at   | 0.036203545  | 3.760904007 | 0.385376779  | 0.708530822 | 0.708530822 | -5.56067532  |
| 1434450_s_at | 0.031998673  | 8.899686516 | 0.38537296   | 0.708533557 | 0.708533557 | -5.560676719 |
| 1448451_at   | 0.028480183  | 9.134708557 | 0.385334176  | 0.708561333 | 0.708561333 | -5.560690921 |
| 1429454_at   | 0.024416584  | 10.27754091 | 0.385331488  | 0.708563258 | 0.708563258 | -5.560691905 |
| 1420129_s_at | -0.025941644 | 10.57952277 | -0.385325496 | 0.708567549 | 0.708567549 | -5.560694099 |
| 1450099_a_at | -0.035971044 | 8.067194807 | -0.385312538 | 0.70857683  | 0.70857683  | -5.560698844 |
| 1429211_at   | 0.037083277  | 4.149479346 | 0.38530217   | 0.708584255 | 0.708584255 | -5.560702641 |
| 1448757_at   | 0.032457269  | 7.358961854 | 0.385264551  | 0.708611198 | 0.708611198 | -5.560716414 |
| 1419504_at   | -0.035748831 | 4.45674423  | -0.38523003  | 0.708635923 | 0.708635923 | -5.560729053 |
| 1453056_at   | 0.033847927  | 6.390345311 | 0.385198713  | 0.708658352 | 0.708658352 | -5.560740517 |
| 1452187_at   | 0.029560369  | 8.487589266 | 0.385151787  | 0.708691962 | 0.708691962 | -5.560757693 |
| 1438701_at   | -0.04413095  | 3.834695377 | -0.385147782 | 0.708694831 | 0.708694831 | -5.560759159 |
| 1419945_s_at | 0.029383973  | 11.12284683 | 0.385144418  | 0.70869724  | 0.70869724  | -5.560760391 |
| 1435135_at   | 0.044653885  | 5.714300073 | 0.385116073  | 0.708717542 | 0.708717542 | -5.560770765 |
| 1447690_at   | 0.056802065  | 3.761094084 | 0.385107654  | 0.708723572 | 0.708723572 | -5.560773846 |
| 1417407_at   | 0.025966719  | 8.043757124 | 0.385085451  | 0.708739475 | 0.708739475 | -5.560781971 |
| 1448957_at   | 0.02409873   | 9.09943724  | 0.385052373  | 0.708763167 | 0.708763167 | -5.560794076 |
| 1452113_a_at | 0.027595838  | 7.711929776 | 0.384988998  | 0.708808562 | 0.708808562 | -5.560817264 |
| 1419764_at   | 0.02509652   | 3.388179012 | 0.384970109  | 0.708822092 | 0.708822092 | -5.560824175 |
| 1423195_at   | 0.036738354  | 9.243984234 | 0.38493862   | 0.708844647 | 0.708844647 | -5.560835695 |
| 1452742_at   | -0.046501364 | 6.77054947  | -0.384926157 | 0.708853574 | 0.708853574 | -5.560840254 |
| 1417595_at   | 0.062529018  | 6.681832341 | 0.384896946  | 0.708874498 | 0.708874498 | -5.560850939 |
| 1447385_at   | 0.029681061  | 4.239415876 | 0.384880912  | 0.708885984 | 0.708885984 | -5.560856804 |
| 1448857_a_at | 0.0231866    | 8.38454274  | 0.384868728  | 0.708894711 | 0.708894711 | -5.56086126  |
| 1433459_x_at | 0.031812106  | 3.287776616 | 0.3847997    | 0.708944158 | 0.708944158 | -5.560886506 |
| 1420926_at   | 0.026687524  | 5.096434905 | 0.384790871  | 0.708950483 | 0.708950483 | -5.560889734 |
| 1429965_at   | -0.027308669 | 7.339861957 | -0.384691224 | 0.709021866 | 0.709021866 | -5.560926169 |
| 1434851_s_at | -0.041811137 | 6.323132138 | -0.384651202 | 0.709050537 | 0.709050537 | -5.5609408   |
| 1435530_at   | 0.030014558  | 7.719400179 | 0.384592413  | 0.709092653 | 0.709092653 | -5.560962289 |
| 1455630_at   | -0.026174195 | 8.595474089 | -0.384560182 | 0.709115744 | 0.709115744 | -5.560974069 |
| 1446570_at   | -0.03827806  | 6.097158295 | -0.384543272 | 0.709127859 | 0.709127859 | -5.560980249 |
| 1444076_at   | -0.040934998 | 7.098011075 | -0.384523496 | 0.709142027 | 0.709142027 | -5.560987477 |
| 1457340_at   | 0.03160595   | 3.922680476 | 0.384509639  | 0.709151954 | 0.709151954 | -5.56099254  |
| 1422925_s_at | 0.02397383   | 5.380803471 | 0.384497382  | 0.709160736 | 0.709160736 | -5.560997019 |
| 1452340_at   | 0.025182227  | 9.683669596 | 0.384481067  | 0.709172425 | 0.709172425 | -5.561002981 |
| 1449539_at   | 0.03097564   | 3.137829387 | 0.384476964  | 0.709175364 | 0.709175364 | -5.56100448  |
| 1427349_x_at | 0.0445901    | 8.226409786 | 0.384385441  | 0.709240936 | 0.709240936 | -5.561037918 |
| 1429233_at   | -0.037845225 | 9.989266308 | -0.384382817 | 0.709242816 | 0.709242816 | -5.561038877 |
| 1419263_a_at | -0.038868457 | 9.372875862 | -0.384360783 | 0.709258603 | 0.709258603 | -5.561046926 |
| 1442908_at   | -0.026051948 | 6.662945192 | -0.384242265 | 0.70934352  | 0.70934352  | -5.561090213 |
| 1430598_at   | -0.046620965 | 3.375817769 | -0.384238966 | 0.709345884 | 0.709345884 | -5.561091418 |
| 1434830_at   | 0.029386156  | 7.761858366 | 0.384238268  | 0.709346384 | 0.709346384 | -5.561091673 |
| 1451588_at   | -0.035512062 | 4.768219612 | -0.384236088 | 0.709347946 | 0.709347946 | -5.561092469 |
| 1443575_at   | -0.029444663 | 3.626034473 | -0.384069547 | 0.709467279 | 0.709467279 | -5.561153273 |
| 1459264_at   | -0.029037477 | 3.239006699 | -0.384064482 | 0.709470908 | 0.709470908 | -5.561155121 |
| 1436611_at   | 0.031421175  | 3.430410299 | 0.383973878  | 0.709535833 | 0.709535833 | -5.56118819  |
| 1442426_at   | -0.060556044 | 5.808315483 | -0.383973336 | 0.709536221 | 0.709536221 | -5.561188387 |
| 1422538_at   | -0.042258793 | 7.696129823 | -0.383935669 | 0.709563213 | 0.709563213 | -5.561202133 |
| 1427688_a_at | -0.056016296 | 6.848530933 | -0.383910016 | 0.709581597 | 0.709581597 | -5.561211493 |
| 1442545_at   | -0.046172366 | 4.622948533 | -0.383837186 | 0.709633788 | 0.709633788 | -5.561238065 |
| 1446469_at   | 0.042539905  | 3.58187673  | 0.38383254   | 0.709637117 | 0.709637117 | -5.56123976  |
| 1420793_at   | 0.028011955  | 3.181127831 | 0.383813561  | 0.709650719 | 0.709650719 | -5.561246683 |



|              |              |             |              |             |             |              |
|--------------|--------------|-------------|--------------|-------------|-------------|--------------|
| 1444819_at   | -0.026949952 | 3.885107642 | -0.383812402 | 0.709651549 | 0.709651549 | -5.561247106 |
| 1446041_at   | 0.025437947  | 3.879052396 | 0.383756258  | 0.709691785 | 0.709691785 | -5.561267585 |
| 1443362_at   | -0.051701241 | 6.490659983 | -0.383684241 | 0.709743397 | 0.709743397 | -5.56129385  |
| 1427743_at   | 0.048383432  | 6.019582819 | 0.383679659  | 0.709746668 | 0.709746668 | -5.56129552  |
| 1416606_s_at | 0.024355279  | 10.54805375 | 0.383647926  | 0.709769424 | 0.709769424 | -5.561307092 |
| 1429611_at   | -0.035958302 | 4.306520277 | -0.383627846 | 0.709783814 | 0.709783814 | -5.561314414 |
| 1420689_at   | -0.030686866 | 3.567389392 | -0.383590332 | 0.709810701 | 0.709810701 | -5.561328091 |
| 1431026_at   | -0.035027919 | 6.662392485 | -0.383568735 | 0.709826179 | 0.709826179 | -5.561335965 |
| 1449918_at   | -0.030838633 | 3.678864946 | -0.383562714 | 0.709830495 | 0.709830495 | -5.56133816  |
| 1430806_at   | 0.025050718  | 3.188136233 | 0.383561578  | 0.709831309 | 0.709831309 | -5.561338574 |
| 1428968_at   | -0.028357713 | 8.753609783 | -0.383558446 | 0.709833554 | 0.709833554 | -5.561339716 |
| 1455867_at   | 0.033437331  | 6.204919032 | 0.383527714  | 0.709855558 | 0.709855558 | -5.561350919 |
| 1417292_at   | 0.032101879  | 5.674468247 | 0.383498295  | 0.709876665 | 0.709876665 | -5.561361643 |
| 1416436_a_at | -0.025832927 | 7.580651351 | -0.383473802 | 0.70989422  | 0.70989422  | -5.56137057  |
| 1452555_at   | -0.026358224 | 3.44849959  | -0.383472719 | 0.709894996 | 0.709894996 | -5.561370965 |
| 1457754_at   | -0.031532272 | 4.957976442 | -0.383469141 | 0.709897561 | 0.709897561 | -5.561372269 |
| 1442195_at   | 0.039528506  | 5.638392451 | 0.383457994  | 0.709905551 | 0.709905551 | -5.561376331 |
| 1440358_at   | -0.025870252 | 6.234363358 | -0.383449009 | 0.70991199  | 0.70991199  | -5.561379606 |
| 1431940_at   | -0.035014814 | 4.385306883 | -0.383409715 | 0.709940155 | 0.709940155 | -5.561393926 |
| 1451130_at   | 0.028973432  | 9.978062019 | 0.383406364  | 0.709942557 | 0.709942557 | -5.561395148 |
| 1426802_at   | -0.039979363 | 6.895797717 | -0.383341616 | 0.709988966 | 0.709988966 | -5.561418741 |
| 1428069_at   | 0.028977539  | 9.53791237  | 0.383339994  | 0.709990129 | 0.709990129 | -5.561419331 |
| 1418208_at   | -0.043033685 | 3.911876516 | -0.383327306 | 0.709999223 | 0.709999223 | -5.561423954 |
| 1431013_at   | 0.029742915  | 4.668217737 | 0.383311726  | 0.710010391 | 0.710010391 | -5.561429631 |
| 1444499_at   | -0.027626103 | 3.463223059 | -0.383267557 | 0.710042051 | 0.710042051 | -5.561445722 |
| 1449323_a_at | -0.02395695  | 13.68876392 | -0.383227331 | 0.710070885 | 0.710070885 | -5.561460375 |
| 1418495_at   | -0.030749767 | 7.238423951 | -0.383146045 | 0.710129153 | 0.710129153 | -5.56148998  |
| 1422586_at   | 0.029449186  | 5.484991331 | 0.383027694  | 0.710213994 | 0.710213994 | -5.561533074 |
| 1422852_at   | -0.024756792 | 7.969566621 | -0.383023978 | 0.710216658 | 0.710216658 | -5.561534427 |
| 1424996_at   | -0.027213408 | 7.637380309 | -0.382968109 | 0.710256709 | 0.710256709 | -5.561554765 |
| 1453997_a_at | -0.032069315 | 4.606737743 | -0.382965513 | 0.71025857  | 0.71025857  | -5.56155571  |
| 1433857_at   | -0.033626327 | 12.05743015 | -0.382947588 | 0.710271421 | 0.710271421 | -5.561562235 |
| 1418985_at   | 0.041117845  | 5.557327702 | 0.382894558  | 0.710309439 | 0.710309439 | -5.561581537 |
| 1455570_x_at | 0.026233084  | 11.71917189 | 0.382856436  | 0.710336769 | 0.710336769 | -5.56159541  |
| 1455432_at   | -0.026317864 | 8.119174855 | -0.382811391 | 0.710369063 | 0.710369063 | -5.561611802 |
| 1445134_at   | -0.029291206 | 6.786866718 | -0.382765115 | 0.71040224  | 0.71040224  | -5.561628639 |
| 1432233_at   | -0.030214978 | 5.142261546 | -0.382762937 | 0.710403802 | 0.710403802 | -5.561629431 |
| 1454112_a_at | -0.093873011 | 7.181942629 | -0.382731475 | 0.710426359 | 0.710426359 | -5.561640877 |
| 1422797_at   | 0.031649668  | 9.388050491 | 0.382714708  | 0.71043838  | 0.71043838  | -5.561646977 |
| 1432572_at   | 0.040038827  | 6.065482916 | 0.382704095  | 0.71044599  | 0.71044599  | -5.561650838 |
| 1436113_a_at | 0.026157804  | 10.51739505 | 0.382676114  | 0.710466051 | 0.710466051 | -5.561661016 |
| 1437681_at   | -0.043582379 | 5.483961548 | -0.382596839 | 0.710522891 | 0.710522891 | -5.561689849 |
| 1454548_at   | -0.024538468 | 4.489415235 | -0.382589162 | 0.710528395 | 0.710528395 | -5.561692641 |
| 1460096_at   | 0.041147133  | 6.627091977 | 0.382580514  | 0.710534596 | 0.710534596 | -5.561695786 |
| 1442200_at   | 0.031678441  | 4.993748802 | 0.382575543  | 0.71053816  | 0.71053816  | -5.561697593 |
| 1428746_a_at | 0.026771514  | 8.080746797 | 0.38252355   | 0.71057544  | 0.71057544  | -5.5617165   |
| 1444288_at   | -0.048564839 | 6.638135405 | -0.382510653 | 0.710584687 | 0.710584687 | -5.561721189 |
| 1421352_at   | 0.028973681  | 4.610827042 | 0.382346009  | 0.710702746 | 0.710702746 | -5.56178104  |
| 1416465_a_at | 0.040697102  | 10.56617895 | 0.382333257  | 0.71071189  | 0.71071189  | -5.561785674 |
| 1423612_at   | -0.032586518 | 8.210169767 | -0.382281043 | 0.710749332 | 0.710749332 | -5.561804649 |
| 1448397_at   | -0.041013883 | 4.768995851 | -0.382258924 | 0.710765194 | 0.710765194 | -5.561812687 |
| 1422278_at   | -0.023535939 | 3.647934994 | -0.382249864 | 0.710771691 | 0.710771691 | -5.561815979 |
| 1420414_at   | -0.03559703  | 4.198371827 | -0.382243019 | 0.710776599 | 0.710776599 | -5.561818466 |

|              |              |             |              |             |             |              |
|--------------|--------------|-------------|--------------|-------------|-------------|--------------|
| 1429877_at   | -0.034531286 | 3.189604166 | -0.382237236 | 0.710780747 | 0.710780747 | -5.561820567 |
| 1460592_at   | -0.030982009 | 7.722601189 | -0.382225369 | 0.710789256 | 0.710789256 | -5.561824879 |
| 1451955_a_at | -0.036892739 | 4.010601801 | -0.382218942 | 0.710793865 | 0.710793865 | -5.561827214 |
| 1450120_at   | 0.029011801  | 4.367461181 | 0.382181391  | 0.710820794 | 0.710820794 | -5.561840856 |
| 1416004_at   | -0.023821101 | 10.57124309 | -0.382016666 | 0.710938927 | 0.710938927 | -5.561900687 |
| 1421891_at   | 0.034089616  | 8.870086347 | 0.381957388  | 0.71098144  | 0.71098144  | -5.561922211 |
| 1438643_at   | 0.074445535  | 5.38108378  | 0.38191622   | 0.711010966 | 0.711010966 | -5.561937158 |
| 1454377_at   | -0.03463072  | 4.167117502 | -0.381783342 | 0.71110627  | 0.71110627  | -5.561985391 |
| 1446023_at   | 0.028345036  | 3.810960714 | 0.381751286  | 0.711129262 | 0.711129262 | -5.561997024 |
| 1456046_at   | -0.023298508 | 9.42465261  | -0.381748356 | 0.711131363 | 0.711131363 | -5.561998087 |
| 1418432_at   | 0.045793337  | 8.447297811 | 0.381677826  | 0.711181952 | 0.711181952 | -5.56202368  |
| 1426027_a_at | -0.031917703 | 5.63028303  | -0.381651157 | 0.711201082 | 0.711201082 | -5.562033356 |
| 1419336_at   | 0.027343761  | 4.07831772  | 0.38161302   | 0.711228437 | 0.711228437 | -5.562047192 |
| 1429564_at   | 0.043168018  | 6.655752738 | 0.381591433  | 0.711243921 | 0.711243921 | -5.562055023 |
| 1433275_at   | -0.033813243 | 3.671440688 | -0.38156494  | 0.711262925 | 0.711262925 | -5.562064633 |
| 1422027_a_at | 0.031269597  | 6.637118723 | 0.381460503  | 0.71133784  | 0.71133784  | -5.562102509 |
| 1426357_at   | 0.026077849  | 7.685397449 | 0.381451275  | 0.71134446  | 0.71134446  | -5.562105855 |
| 1454340_at   | 0.032722124  | 3.730004537 | 0.381414885  | 0.711370564 | 0.711370564 | -5.562119051 |
| 1436553_at   | -0.038586473 | 4.848462674 | -0.381356939 | 0.711412133 | 0.711412133 | -5.56214006  |
| 1417396_at   | -0.037696361 | 5.445429532 | -0.381334445 | 0.711428269 | 0.711428269 | -5.562148214 |
| 1438995_at   | -0.045805995 | 4.467030452 | -0.381323946 | 0.711435801 | 0.711435801 | -5.56215202  |
| 1433853_at   | 0.052017102  | 3.581993799 | 0.381299545  | 0.711453306 | 0.711453306 | -5.562160865 |
| 1460388_at   | 0.031898057  | 4.341505968 | 0.381218947  | 0.711511127 | 0.711511127 | -5.562190078 |
| 1459442_at   | -0.040295199 | 7.514458992 | -0.381185967 | 0.711534788 | 0.711534788 | -5.562202029 |
| 1426935_at   | -0.033146487 | 4.362150618 | -0.381168054 | 0.711547639 | 0.711547639 | -5.56220852  |
| 1455901_at   | 0.064376444  | 6.86395689  | 0.381152413  | 0.71155886  | 0.71155886  | -5.562214188 |
| 1457865_at   | 0.042306308  | 3.678376081 | 0.381151426  | 0.711559568 | 0.711559568 | -5.562214545 |
| 1438171_x_at | 0.059233434  | 10.10345009 | 0.381148204  | 0.71156188  | 0.71156188  | -5.562215713 |
| 1452035_at   | 0.043325913  | 11.45578011 | 0.381077534  | 0.711612582 | 0.711612582 | -5.562241317 |
| 1454016_at   | -0.030419385 | 3.937654025 | -0.381034465 | 0.711643482 | 0.711643482 | -5.562256919 |
| 1420870_at   | 0.028156936  | 8.943482802 | 0.380986831  | 0.711677659 | 0.711677659 | -5.562274173 |
| 1425419_a_at | 0.027766255  | 10.13025153 | 0.380980568  | 0.711682152 | 0.711682152 | -5.562276441 |
| 1458846_at   | 0.024378367  | 3.040737654 | 0.380977814  | 0.711684128 | 0.711684128 | -5.562277439 |
| 1418199_at   | -0.037110406 | 3.724557623 | -0.380854507 | 0.711772601 | 0.711772601 | -5.562322092 |
| 1443222_at   | -0.04314949  | 6.58924743  | -0.380776923 | 0.71182827  | 0.71182827  | -5.56235018  |
| 1450523_at   | 0.02766914   | 5.566832653 | 0.380715905  | 0.711872054 | 0.711872054 | -5.562372267 |
| 1423787_at   | 0.031483627  | 8.887022457 | 0.380676673  | 0.711900206 | 0.711900206 | -5.562386466 |
| 1437573_at   | 0.043522424  | 3.916541771 | 0.380650858  | 0.71191873  | 0.71191873  | -5.562395809 |
| 1452631_at   | 0.072273517  | 4.482844133 | 0.380608653  | 0.711949016 | 0.711949016 | -5.562411081 |
| 1420045_at   | -0.023396948 | 4.853584491 | -0.380593453 | 0.711959924 | 0.711959924 | -5.562416581 |
| 1451973_at   | 0.023409114  | 9.687284476 | 0.380529845  | 0.71200557  | 0.71200557  | -5.562439595 |
| 1429945_at   | 0.026422006  | 4.286467222 | 0.380517021  | 0.712014772 | 0.712014772 | -5.562444234 |
| 1417934_at   | 0.029887901  | 7.910902165 | 0.380392097  | 0.712104423 | 0.712104423 | -5.56248942  |
| 1426597_s_at | 0.03006016   | 7.518605393 | 0.380378071  | 0.712114489 | 0.712114489 | -5.562494492 |
| 1415670_at   | 0.025688584  | 9.791287379 | 0.380339152  | 0.71214242  | 0.71214242  | -5.562508566 |
| 1444533_at   | 0.033312229  | 3.319717011 | 0.380332508  | 0.712147189 | 0.712147189 | -5.562510968 |
| 1435489_at   | 0.033811459  | 7.080599117 | 0.380332297  | 0.71214734  | 0.71214734  | -5.562511044 |
| 1443824_s_at | -0.03708583  | 5.367697095 | -0.380265964 | 0.712194946 | 0.712194946 | -5.562535028 |
| 1428683_at   | 0.063306219  | 7.186605503 | 0.380226244  | 0.712223453 | 0.712223453 | -5.562549387 |
| 1430983_at   | -0.066886646 | 5.409143961 | -0.380207709 | 0.712236756 | 0.712236756 | -5.562556087 |
| 1425442_at   | -0.029359133 | 4.978644169 | -0.380187293 | 0.712251409 | 0.712251409 | -5.562563467 |
| 1440110_at   | 0.033121159  | 4.560522932 | 0.380123372  | 0.712297287 | 0.712297287 | -5.56258657  |
| 1416908_s_at | 0.029381052  | 10.50108889 | 0.380107171  | 0.712308915 | 0.712308915 | -5.562592425 |

|              |              |             |              |             |             |              |
|--------------|--------------|-------------|--------------|-------------|-------------|--------------|
| 1426819_at   | -0.033982046 | 10.2618473  | -0.380072387 | 0.712333881 | 0.712333881 | -5.562604995 |
| 1421586_a_at | 0.033696885  | 5.492051786 | 0.380039762  | 0.712357298 | 0.712357298 | -5.562616783 |
| 1420725_at   | 0.059208855  | 6.117213438 | 0.379955049  | 0.712418104 | 0.712418104 | -5.562647389 |
| 1437076_at   | -0.027076539 | 3.794649426 | -0.379933967 | 0.712433236 | 0.712433236 | -5.562655005 |
| 1422859_a_at | 0.030280541  | 8.180620884 | 0.379911768  | 0.71244917  | 0.71244917  | -5.562663023 |
| 1445813_at   | 0.037109115  | 4.273679383 | 0.379899465  | 0.712458001 | 0.712458001 | -5.562667467 |
| 1434837_at   | 0.025922259  | 7.542326481 | 0.37989126   | 0.712463891 | 0.712463891 | -5.562670431 |
| 1445544_x_at | 0.030311     | 4.306684402 | 0.379795428  | 0.712532682 | 0.712532682 | -5.56270504  |
| 1452299_at   | 0.03521058   | 8.286040987 | 0.379762297  | 0.712556465 | 0.712556465 | -5.562717003 |
| 1430841_at   | -0.042437013 | 4.711706798 | -0.379727566 | 0.712581396 | 0.712581396 | -5.562729542 |
| 1424874_a_at | -0.042902547 | 11.78876196 | -0.379725455 | 0.712582911 | 0.712582911 | -5.562730305 |
| 1417535_at   | 0.038093617  | 8.58979981  | 0.379723107  | 0.712584597 | 0.712584597 | -5.562731152 |
| 1452529_a_at | -0.027298929 | 5.515606651 | -0.379706585 | 0.712596458 | 0.712596458 | -5.562737117 |
| 1446282_at   | -0.03003609  | 3.589161303 | -0.379684876 | 0.712612042 | 0.712612042 | -5.562744955 |
| 1460391_at   | 0.030024441  | 6.827100756 | 0.379661687  | 0.712628689 | 0.712628689 | -5.562753325 |
| 1420415_at   | -0.030565195 | 4.196304494 | -0.379599653 | 0.712673222 | 0.712673222 | -5.562775717 |
| 1436942_at   | 0.044717359  | 7.469656987 | 0.379583992  | 0.712684465 | 0.712684465 | -5.562781369 |
| 1443329_at   | -0.034492153 | 4.037092963 | -0.379571614 | 0.712693351 | 0.712693351 | -5.562785836 |
| 1426491_at   | -0.029069024 | 8.364037824 | -0.379556198 | 0.712704419 | 0.712704419 | -5.562791399 |
| 1459016_at   | 0.032147961  | 3.660076054 | 0.379520686  | 0.712729913 | 0.712729913 | -5.562804214 |
| 1448750_at   | -0.025878288 | 4.698562439 | -0.379390858 | 0.712823121 | 0.712823121 | -5.562851054 |
| 1435086_s_at | 0.041921546  | 9.69836936  | 0.379375859  | 0.71283389  | 0.71283389  | -5.562856465 |
| 1456597_at   | -0.02416533  | 8.453699096 | -0.37935498  | 0.712848881 | 0.712848881 | -5.562863996 |
| 1453777_a_at | -0.031822853 | 3.863801781 | -0.379327375 | 0.7128687   | 0.7128687   | -5.562873953 |
| 1450082_s_at | -0.042607948 | 5.958939401 | -0.379316469 | 0.712876531 | 0.712876531 | -5.562877886 |
| 1446142_at   | 0.025429531  | 3.348264787 | 0.379314774  | 0.712877748 | 0.712877748 | -5.562878498 |
| 1422103_a_at | 0.034861237  | 7.567241193 | 0.379289113  | 0.712896172 | 0.712896172 | -5.562887752 |
| 1431992_at   | -0.03137038  | 5.048335126 | -0.379258672 | 0.712918029 | 0.712918029 | -5.56289873  |
| 1440440_at   | -0.039740221 | 7.359165648 | -0.379257832 | 0.712918631 | 0.712918631 | -5.562899033 |
| 1432121_a_at | 0.037132059  | 3.245777884 | 0.379195989  | 0.712963035 | 0.712963035 | -5.562921332 |
| 1446187_at   | -0.050577    | 4.568762666 | -0.379106527 | 0.713027272 | 0.713027272 | -5.562953584 |
| 1421959_s_at | -0.039785488 | 6.902818283 | -0.379093234 | 0.713036816 | 0.713036816 | -5.562958375 |
| 1448655_at   | -0.038359352 | 9.29178863  | -0.379059241 | 0.713061225 | 0.713061225 | -5.562970628 |
| 1452203_at   | 0.033554423  | 6.550119335 | 0.379056361  | 0.713063293 | 0.713063293 | -5.562971666 |
| 1428625_a_at | 0.038118874  | 8.029864843 | 0.37900284   | 0.713101725 | 0.713101725 | -5.562990955 |
| 1417147_at   | -0.028616532 | 8.039845762 | -0.378992302 | 0.713109292 | 0.713109292 | -5.562994752 |
| 1450421_at   | 0.030920396  | 5.372075666 | 0.378968971  | 0.713126045 | 0.713126045 | -5.563003159 |
| 1437422_at   | -0.035445156 | 10.06938714 | -0.378917847 | 0.713162757 | 0.713162757 | -5.56302158  |
| 1429612_at   | -0.026116269 | 10.09055099 | -0.378855134 | 0.713207792 | 0.713207792 | -5.563044173 |
| 1459684_at   | -0.029168443 | 3.274790002 | -0.378850883 | 0.713210844 | 0.713210844 | -5.563045705 |
| 1423078_a_at | 0.031752878  | 9.016924368 | 0.378788429  | 0.713255694 | 0.713255694 | -5.563068201 |
| 1429433_at   | 0.026962446  | 11.07236937 | 0.378767256  | 0.7132709   | 0.7132709   | -5.563075827 |
| 1415781_a_at | 0.02590989   | 13.22537327 | 0.378761034  | 0.713275367 | 0.713275367 | -5.563078067 |
| 1423164_at   | 0.028906623  | 7.221785813 | 0.378758435  | 0.713277235 | 0.713277235 | -5.563079004 |
| 1434759_at   | 0.030848903  | 3.912993477 | 0.378741236  | 0.713289585 | 0.713289585 | -5.563085197 |
| 1430009_at   | -0.029116864 | 3.691558888 | -0.37868195  | 0.713332162 | 0.713332162 | -5.563106547 |
| 1438444_at   | -0.028975823 | 3.362394306 | -0.378649148 | 0.71335572  | 0.71335572  | -5.563118357 |
| 1443068_at   | 0.026010811  | 7.059983845 | 0.378646924  | 0.713357317 | 0.713357317 | -5.563119158 |
| 1421514_a_at | -0.030072963 | 6.567947013 | -0.378529503 | 0.713441648 | 0.713441648 | -5.563161429 |
| 1454559_at   | 0.026596091  | 3.774090293 | 0.378515895  | 0.713451422 | 0.713451422 | -5.563166327 |
| 1426339_at   | -0.027039755 | 5.264123999 | -0.378507035 | 0.713457785 | 0.713457785 | -5.563169515 |
| 1417860_a_at | 0.054390929  | 6.069111551 | 0.378479956  | 0.713477234 | 0.713477234 | -5.563179261 |
| 1441830_x_at | 0.031537884  | 3.452264356 | 0.378440037  | 0.713505906 | 0.713505906 | -5.563193627 |

|              |              |             |              |             |             |              |
|--------------|--------------|-------------|--------------|-------------|-------------|--------------|
| 1445927_at   | 0.027547265  | 4.900905862 | 0.378421206  | 0.71351943  | 0.71351943  | -5.563200403 |
| 1439348_at   | 0.034833628  | 6.411039832 | 0.378418803  | 0.713521156 | 0.713521156 | -5.563201268 |
| 1451089_a_at | -0.033329347 | 11.3471816  | -0.378344808 | 0.713574304 | 0.713574304 | -5.563227891 |
| 1453775_at   | -0.055294314 | 5.682792472 | -0.378323007 | 0.713589963 | 0.713589963 | -5.563235735 |
| 1459775_at   | -0.027429434 | 5.017368384 | -0.378309436 | 0.71359971  | 0.71359971  | -5.563240616 |
| 1447182_at   | 0.027132319  | 3.417876164 | 0.378299772  | 0.713606652 | 0.713606652 | -5.563244093 |
| 1425084_at   | -0.025283494 | 3.893892063 | -0.378277647 | 0.713622545 | 0.713622545 | -5.563252052 |
| 1445360_at   | 0.034325618  | 5.5007012   | 0.378246575  | 0.713644863 | 0.713644863 | -5.563263228 |
| 1455105_at   | 0.039665558  | 9.52291755  | 0.378239124  | 0.713650215 | 0.713650215 | -5.563265908 |
| 1455665_at   | 0.034472384  | 8.281156669 | 0.378194114  | 0.713682546 | 0.713682546 | -5.563282096 |
| 1442045_at   | -0.025113365 | 3.840866609 | -0.378156552 | 0.713709527 | 0.713709527 | -5.563295603 |
| 1448539_a_at | 0.043597815  | 4.739741527 | 0.378156516  | 0.713709553 | 0.713709553 | -5.563295616 |
| 1421634_at   | -0.03392207  | 4.625166273 | -0.378135773 | 0.713724453 | 0.713724453 | -5.563303075 |
| 1416730_at   | 0.024399122  | 8.403268834 | 0.378113771  | 0.713740258 | 0.713740258 | -5.563310986 |
| 1450927_at   | 0.026728071  | 8.962456656 | 0.378046379  | 0.713788669 | 0.713788669 | -5.563335215 |
| 1435705_at   | 0.024291435  | 7.406655718 | 0.378042479  | 0.713791471 | 0.713791471 | -5.563336618 |
| 1440507_at   | 0.027506979  | 5.450822921 | 0.378001957  | 0.71382058  | 0.71382058  | -5.563351184 |
| 1417012_at   | -0.035733606 | 8.835365969 | -0.378000051 | 0.713821949 | 0.713821949 | -5.563351869 |
| 1426678_at   | 0.027438956  | 10.0970099  | 0.377982738  | 0.713834387 | 0.713834387 | -5.563358092 |
| 1421582_a_at | 0.030810069  | 5.857721664 | 0.377952389  | 0.713856189 | 0.713856189 | -5.563369    |
| 1449127_at   | -0.029047921 | 5.900204596 | -0.377939119 | 0.713865722 | 0.713865722 | -5.563373769 |
| 1454219_at   | -0.02637583  | 3.886063722 | -0.377910035 | 0.713886615 | 0.713886615 | -5.563384222 |
| 1430713_s_at | 0.030288033  | 11.7177153  | 0.377901423  | 0.713892802 | 0.713892802 | -5.563387316 |
| 1424435_a_at | -0.034433564 | 9.022126732 | -0.377857188 | 0.713924581 | 0.713924581 | -5.563403212 |
| 1431832_x_at | -0.036100032 | 9.345390757 | -0.37783972  | 0.713937131 | 0.713937131 | -5.563409488 |
| 1435045_s_at | 0.039633312  | 4.705892709 | 0.377756434  | 0.713996965 | 0.713996965 | -5.56343941  |
| 1437662_at   | -0.023849709 | 3.712687774 | -0.377748426 | 0.714002719 | 0.714002719 | -5.563442286 |
| 1458220_at   | -0.043754197 | 6.302930481 | -0.377694541 | 0.714041433 | 0.714041433 | -5.563461642 |
| 1460547_a_at | 0.040307588  | 12.27038088 | 0.377685062  | 0.714048243 | 0.714048243 | -5.563465046 |
| 1437509_x_at | -0.037921616 | 4.517919222 | -0.377645985 | 0.714076319 | 0.714076319 | -5.563479081 |
| 1455425_at   | 0.033527617  | 7.461806252 | 0.377609102  | 0.714102818 | 0.714102818 | -5.563492325 |
| 1440427_at   | 0.04026986   | 5.399994453 | 0.377598339  | 0.714110552 | 0.714110552 | -5.56349619  |
| 1422889_at   | -0.050549263 | 9.985034323 | -0.377565373 | 0.714134237 | 0.714134237 | -5.563508027 |
| 1445256_at   | 0.049140274  | 5.853132544 | 0.377557128  | 0.714140161 | 0.714140161 | -5.563510988 |
| 1424829_at   | -0.024810969 | 6.669607243 | -0.377549249 | 0.714145822 | 0.714145822 | -5.563513817 |
| 1427913_at   | -0.033876799 | 9.963074505 | -0.377542645 | 0.714150567 | 0.714150567 | -5.563516188 |
| 1425802_a_at | -0.039144523 | 3.826738062 | -0.377471905 | 0.714201395 | 0.714201395 | -5.563541583 |
| 1425676_a_at | -0.023882067 | 8.534379964 | -0.377453176 | 0.714214853 | 0.714214853 | -5.563548306 |
| 1424947_at   | -0.024025903 | 8.209182102 | -0.377440045 | 0.714224288 | 0.714224288 | -5.563553019 |
| 1428708_x_at | -0.037727026 | 10.61783303 | -0.377407391 | 0.714247751 | 0.714247751 | -5.56356474  |
| 1455265_a_at | 0.030030587  | 5.427394315 | 0.377390585  | 0.714259826 | 0.714259826 | -5.563570771 |
| 1442658_at   | 0.022382059  | 6.625810082 | 0.377389881  | 0.714260332 | 0.714260332 | -5.563571024 |
| 1418074_at   | -0.044508828 | 6.397600625 | -0.377365372 | 0.714277943 | 0.714277943 | -5.563579819 |
| 1419129_at   | 0.037093906  | 5.476387471 | 0.37731176   | 0.714316467 | 0.714316467 | -5.563599058 |
| 1429443_at   | 0.035616194  | 3.814197746 | 0.37725471   | 0.714357463 | 0.714357463 | -5.563619527 |
| 1443422_at   | -0.029001381 | 6.007530738 | -0.377251919 | 0.714359468 | 0.714359468 | -5.563620528 |
| 1439506_at   | 0.033602718  | 5.737879455 | 0.377188376  | 0.71440513  | 0.71440513  | -5.563643323 |
| 1432546_at   | -0.030965792 | 3.584921985 | -0.377178715 | 0.714412073 | 0.714412073 | -5.563646789 |
| 1440369_at   | -0.036231288 | 3.767772235 | -0.377086093 | 0.714478633 | 0.714478633 | -5.563680008 |
| 1447027_s_at | -0.025365287 | 9.737080837 | -0.377019324 | 0.714526617 | 0.714526617 | -5.56370395  |
| 1430975_at   | -0.037467905 | 4.002808007 | -0.376968753 | 0.714562961 | 0.714562961 | -5.563722081 |
| 1418491_a_at | 0.027260167  | 6.985082599 | 0.376961463  | 0.7145682   | 0.7145682   | -5.563724694 |
| 1443081_at   | 0.026938575  | 4.373984889 | 0.376957994  | 0.714570693 | 0.714570693 | -5.563725938 |

|              |              |             |              |             |             |              |
|--------------|--------------|-------------|--------------|-------------|-------------|--------------|
| 1438723_a_at | 0.02423842   | 13.38098115 | 0.376902337  | 0.714610692 | 0.714610692 | -5.563745889 |
| 1424464_s_at | -0.049972808 | 3.748090846 | -0.376894036 | 0.714616659 | 0.714616659 | -5.563748864 |
| 1443585_at   | 0.036509713  | 4.587166374 | 0.376862708  | 0.714639174 | 0.714639174 | -5.563760093 |
| 1428693_at   | 0.077121744  | 5.585090671 | 0.376848039  | 0.714649717 | 0.714649717 | -5.56376535  |
| 1422307_at   | 0.034763912  | 6.460478875 | 0.37684657   | 0.714650773 | 0.714650773 | -5.563765877 |
| 1428837_at   | 0.025371584  | 3.279269849 | 0.376832623  | 0.714660797 | 0.714660797 | -5.563770875 |
| 1420885_a_at | 0.028901488  | 6.175211389 | 0.376817162  | 0.714671908 | 0.714671908 | -5.563776416 |
| 1433672_at   | -0.029684923 | 7.718960358 | -0.376811729 | 0.714675813 | 0.714675813 | -5.563778363 |
| 1445618_at   | 0.049012432  | 7.371429862 | 0.37679399   | 0.714688563 | 0.714688563 | -5.56378472  |
| 1436157_at   | 0.030484059  | 10.89860202 | 0.376782759  | 0.714696635 | 0.714696635 | -5.563788744 |
| 1420997_a_at | -0.039388533 | 10.28850678 | -0.376779483 | 0.714698989 | 0.714698989 | -5.563789918 |
| 1427499_at   | -0.032641654 | 4.666009648 | -0.376711801 | 0.714747635 | 0.714747635 | -5.563814168 |
| 1453848_s_at | 0.044910876  | 8.380077052 | 0.376711664  | 0.714747734 | 0.714747734 | -5.563814217 |
| 1431444_at   | 0.031694601  | 3.700360421 | 0.376709762  | 0.714749101 | 0.714749101 | -5.563814899 |
| 1416570_s_at | 0.032439306  | 8.934334094 | 0.376666399  | 0.714780268 | 0.714780268 | -5.563830433 |
| 1453642_at   | -0.039686904 | 3.696540322 | -0.376631694 | 0.714805213 | 0.714805213 | -5.563842865 |
| 1445873_at   | -0.033665469 | 6.223173636 | -0.37660365  | 0.71482537  | 0.71482537  | -5.56385291  |
| 1448828_at   | -0.031529311 | 9.476712748 | -0.376580361 | 0.71484211  | 0.71484211  | -5.563861251 |
| 1434831_a_at | -0.045286363 | 9.262053066 | -0.376514635 | 0.714889354 | 0.714889354 | -5.563884788 |
| 1458635_at   | 0.027370635  | 3.71075094  | 0.3765052    | 0.714896136 | 0.714896136 | -5.563888167 |
| 1454879_s_at | 0.02848829   | 7.055127416 | 0.376481012  | 0.714913523 | 0.714913523 | -5.563896828 |
| 1457956_at   | -0.032556678 | 7.90168749  | -0.376470621 | 0.714920992 | 0.714920992 | -5.563900548 |
| 1457225_at   | -0.03841199  | 4.484112705 | -0.376466229 | 0.71492415  | 0.71492415  | -5.563902121 |
| 1446805_at   | 0.061874615  | 5.178630702 | 0.376336767  | 0.715017212 | 0.715017212 | -5.563948466 |
| 1460102_at   | -0.025571029 | 7.669335064 | -0.376322092 | 0.715027762 | 0.715027762 | -5.563953718 |
| 1425923_at   | 0.033773177  | 6.211944841 | 0.376305293  | 0.715039837 | 0.715039837 | -5.56395973  |
| 1442487_at   | -0.025348568 | 3.486563894 | -0.376304781 | 0.715040206 | 0.715040206 | -5.563959914 |
| 1447108_at   | 0.058591504  | 5.31152206  | 0.376297423  | 0.715045495 | 0.715045495 | -5.563962547 |
| 1421604_a_at | 0.034750419  | 8.094320228 | 0.376290765  | 0.715050281 | 0.715050281 | -5.56396493  |
| 1418480_at   | -0.174039934 | 6.299782575 | -0.376286989 | 0.715052996 | 0.715052996 | -5.563966281 |
| 1450681_at   | -0.027822812 | 5.498150742 | -0.376281092 | 0.715057235 | 0.715057235 | -5.563968391 |
| 1443811_at   | -0.029369864 | 4.348652602 | -0.376277043 | 0.715060146 | 0.715060146 | -5.563969841 |
| 1458526_at   | -0.033774862 | 6.222249108 | -0.376182523 | 0.715128096 | 0.715128096 | -5.564003662 |
| 1444678_at   | 0.033284772  | 3.533414036 | 0.376179591  | 0.715130204 | 0.715130204 | -5.564004711 |
| 1430344_at   | -0.022839867 | 4.633166777 | -0.376134357 | 0.715162723 | 0.715162723 | -5.564020894 |
| 1438685_at   | 0.033291037  | 8.630222477 | 0.376096081  | 0.715190241 | 0.715190241 | -5.564034586 |
| 1421593_at   | -0.029792313 | 3.887425545 | -0.375932745 | 0.715307672 | 0.715307672 | -5.564092999 |
| 1455171_at   | 0.028055529  | 8.401429686 | 0.375903692  | 0.715328561 | 0.715328561 | -5.564103386 |
| 1437310_at   | 0.03418365   | 6.883198707 | 0.375883546  | 0.715343045 | 0.715343045 | -5.564110589 |
| 1417783_at   | 0.028491807  | 7.439604584 | 0.375856339  | 0.715362607 | 0.715362607 | -5.564120315 |
| 1429876_at   | 0.02556159   | 7.278841562 | 0.375848369  | 0.715368338 | 0.715368338 | -5.564123164 |
| 1416301_a_at | -0.045818835 | 7.504542808 | -0.37579979  | 0.715403266 | 0.715403266 | -5.564140529 |
| 1460184_at   | 0.023132482  | 10.56512361 | 0.37579679   | 0.715405424 | 0.715405424 | -5.564141601 |
| 1427441_a_at | 0.030923733  | 8.48022185  | 0.375781419  | 0.715416476 | 0.715416476 | -5.564147095 |
| 1425117_at   | -0.030591601 | 4.747192609 | -0.375675524 | 0.715492618 | 0.715492618 | -5.564184938 |
| 1447289_at   | -0.029350319 | 3.339469179 | -0.375628417 | 0.715526492 | 0.715526492 | -5.564201769 |
| 1435203_at   | 0.023234741  | 9.078430332 | 0.375626914  | 0.715527573 | 0.715527573 | -5.564202306 |
| 1458676_at   | -0.030734279 | 5.874360991 | -0.375572089 | 0.715566996 | 0.715566996 | -5.564221892 |
| 1434535_at   | 0.044095416  | 4.269180326 | 0.375544165  | 0.715587076 | 0.715587076 | -5.564231866 |
| 1456246_x_at | 0.039283244  | 3.779155602 | 0.375530267  | 0.71559707  | 0.71559707  | -5.56423683  |
| 1423806_at   | -0.0312459   | 8.383184149 | -0.375526688 | 0.715599643 | 0.715599643 | -5.564238109 |
| 1417504_at   | -0.040014016 | 3.580184522 | -0.375490558 | 0.715625625 | 0.715625625 | -5.564251013 |
| 1452470_at   | 0.050928234  | 6.755845565 | 0.375486697  | 0.715628401 | 0.715628401 | -5.564252392 |

|              |              |             |              |             |             |              |
|--------------|--------------|-------------|--------------|-------------|-------------|--------------|
| 1419776_at   | 0.026937709  | 3.692692932 | 0.375486554  | 0.715628504 | 0.715628504 | -5.564252443 |
| 1453612_at   | 0.028211978  | 5.358848477 | 0.375454203  | 0.715651768 | 0.715651768 | -5.564263996 |
| 1443498_at   | 0.028361189  | 4.216389016 | 0.375404758  | 0.715687325 | 0.715687325 | -5.564281652 |
| 1460430_at   | 0.024561045  | 9.015986165 | 0.375364916  | 0.715715978 | 0.715715978 | -5.564295878 |
| 1429010_at   | 0.024895136  | 5.986276001 | 0.375327836  | 0.715742644 | 0.715742644 | -5.564309116 |
| 1418547_at   | -0.054397828 | 4.583878408 | -0.375278137 | 0.715778385 | 0.715778385 | -5.564326857 |
| 1419318_at   | 0.027873622  | 4.41060093  | 0.375267509  | 0.715786029 | 0.715786029 | -5.56433065  |
| 1442839_at   | 0.042222722  | 4.046315617 | 0.375248257  | 0.715799875 | 0.715799875 | -5.564337522 |
| 1425252_a_at | 0.045833098  | 6.730512916 | 0.375221074  | 0.715819424 | 0.715819424 | -5.564347224 |
| 1454743_at   | -0.025215884 | 9.990827255 | -0.375200497 | 0.715834223 | 0.715834223 | -5.564354568 |
| 1439955_at   | 0.033208478  | 4.78595053  | 0.375200371  | 0.715834314 | 0.715834314 | -5.564354613 |
| 1452476_at   | 0.036438618  | 4.19837622  | 0.375168726  | 0.715857072 | 0.715857072 | -5.564365905 |
| 1459831_s_at | -0.025016161 | 3.10523291  | -0.375147306 | 0.715872478 | 0.715872478 | -5.564373549 |
| 1436344_at   | -0.03353582  | 6.783528783 | -0.3751091   | 0.715899957 | 0.715899957 | -5.564387181 |
| 1419875_at   | -0.027521698 | 3.141946101 | -0.375092375 | 0.715911986 | 0.715911986 | -5.564393148 |
| 1432100_a_at | 0.028852924  | 4.88750044  | 0.375001442  | 0.715977388 | 0.715977388 | -5.564425587 |
| 1439975_at   | 0.038513059  | 4.452675934 | 0.374957767  | 0.716008802 | 0.716008802 | -5.564441165 |
| 1438971_x_at | 0.032512747  | 9.36874435  | 0.374957261  | 0.716009166 | 0.716009166 | -5.564441346 |
| 1423339_s_at | 0.035686649  | 5.599047424 | 0.374921684  | 0.716034756 | 0.716034756 | -5.564454034 |
| 1444079_at   | 0.027595623  | 4.023206402 | 0.3749003    | 0.716050137 | 0.716050137 | -5.56446166  |
| 1442666_at   | -0.028286823 | 4.019743543 | -0.374834902 | 0.716097177 | 0.716097177 | -5.564484979 |
| 1445276_at   | -0.025542491 | 3.475052743 | -0.37482714  | 0.71610276  | 0.71610276  | -5.564487746 |
| 1428592_s_at | 0.039252956  | 6.759609907 | 0.374777041  | 0.716138798 | 0.716138798 | -5.564505607 |
| 1439593_s_at | 0.031371788  | 7.155180629 | 0.374733455  | 0.71617015  | 0.71617015  | -5.564521144 |
| 1428446_at   | 0.024204699  | 8.697144383 | 0.374673763  | 0.716213089 | 0.716213089 | -5.564542419 |
| 1443438_at   | -0.039598676 | 5.170592351 | -0.374638845 | 0.716238207 | 0.716238207 | -5.564554863 |
| 1441122_at   | -0.032875202 | 3.999981579 | -0.374599416 | 0.716266571 | 0.716266571 | -5.564568913 |
| 1432326_at   | -0.048703898 | 3.543946291 | -0.374590564 | 0.716272939 | 0.716272939 | -5.564572068 |
| 1418978_at   | -0.030388657 | 6.752142131 | -0.374578953 | 0.716281292 | 0.716281292 | -5.564576205 |
| 1434205_at   | 0.027720164  | 9.462540051 | 0.374542767  | 0.716307323 | 0.716307323 | -5.564589097 |
| 1446264_at   | 0.029417464  | 6.581590737 | 0.374453871  | 0.716371276 | 0.716371276 | -5.564620765 |
| 1444873_at   | 0.033091593  | 5.104270542 | 0.37439142   | 0.716416205 | 0.716416205 | -5.564643008 |
| 1440905_at   | 0.027526628  | 7.495637627 | 0.374388112  | 0.716418584 | 0.716418584 | -5.564644186 |
| 1439432_x_at | -0.027269806 | 12.36317905 | -0.374378482 | 0.716425512 | 0.716425512 | -5.564647615 |
| 1422213_s_at | -0.039771657 | 4.132892394 | -0.37436749  | 0.716433421 | 0.716433421 | -5.56465153  |
| 1434897_a_at | 0.033660827  | 11.62919966 | 0.374360317  | 0.716438581 | 0.716438581 | -5.564654084 |
| 1418871_a_at | 0.031384903  | 4.084709161 | 0.374353681  | 0.716443356 | 0.716443356 | -5.564656447 |
| 1445750_at   | -0.037818781 | 3.284272607 | -0.374251563 | 0.716516825 | 0.716516825 | -5.564692806 |
| 1457833_at   | -0.034036791 | 4.015654599 | -0.374204932 | 0.716550375 | 0.716550375 | -5.564709406 |
| 1422662_at   | 0.028441338  | 8.461093125 | 0.374198561  | 0.716554959 | 0.716554959 | -5.564711674 |
| 1416210_at   | 0.027002534  | 9.578194797 | 0.374187865  | 0.716562655 | 0.716562655 | -5.564715481 |
| 1457512_at   | -0.024703435 | 4.347060575 | -0.374146888 | 0.716592138 | 0.716592138 | -5.564730066 |
| 1420283_at   | -0.026393877 | 3.161127909 | -0.37409978  | 0.716626032 | 0.716626032 | -5.564746831 |
| 1416521_at   | -0.036071295 | 9.856442397 | -0.374098889 | 0.716626674 | 0.716626674 | -5.564747148 |
| 1433231_at   | -0.037369773 | 3.793831936 | -0.374097138 | 0.716627934 | 0.716627934 | -5.564747771 |
| 1430390_x_at | -0.03308983  | 3.323273483 | -0.374045135 | 0.716665351 | 0.716665351 | -5.564766276 |
| 1444181_at   | -0.033051374 | 4.607422292 | -0.373951727 | 0.716732563 | 0.716732563 | -5.564799508 |
| 1427726_at   | -0.026430106 | 5.236899539 | -0.373941131 | 0.716740187 | 0.716740187 | -5.564803277 |
| 1418285_at   | 0.038930558  | 8.604144445 | 0.373939219  | 0.716741563 | 0.716741563 | -5.564803957 |
| 1427577_x_at | -0.028488633 | 4.21355363  | -0.373916425 | 0.716757965 | 0.716757965 | -5.564812065 |
| 1459877_x_at | 0.035912633  | 8.874197764 | 0.373861635  | 0.716797391 | 0.716797391 | -5.564831552 |
| 1458753_at   | -0.024565348 | 6.878672131 | -0.373773549 | 0.716860778 | 0.716860778 | -5.564862876 |
| 1450196_s_at | -0.051282613 | 6.662293679 | -0.373732303 | 0.716890459 | 0.716890459 | -5.564877541 |

|              |              |             |              |             |             |              |
|--------------|--------------|-------------|--------------|-------------|-------------|--------------|
| 1459114_at   | -0.026558201 | 3.463340319 | -0.373717403 | 0.716901182 | 0.716901182 | -5.564882838 |
| 1444292_at   | 0.03512222   | 4.068352073 | 0.373711931  | 0.716905119 | 0.716905119 | -5.564884784 |
| 1458018_at   | -0.052596302 | 3.85834079  | -0.373681398 | 0.716927092 | 0.716927092 | -5.564895638 |
| 1417266_at   | 0.034871921  | 4.20905542  | 0.37362027   | 0.716971083 | 0.716971083 | -5.564917366 |
| 1418997_at   | 0.053910735  | 4.55873528  | 0.373589648  | 0.716993121 | 0.716993121 | -5.564928249 |
| 1425322_at   | 0.030683679  | 5.318858888 | 0.373586688  | 0.716995251 | 0.716995251 | -5.564929301 |
| 1446990_at   | -0.041633839 | 8.784414777 | -0.373564084 | 0.717011518 | 0.717011518 | -5.564937334 |
| 1447025_at   | -0.046938315 | 5.945104128 | -0.37356292  | 0.717012356 | 0.717012356 | -5.564937748 |
| 1421671_at   | 0.033918187  | 4.231840087 | 0.373540796  | 0.717028278 | 0.717028278 | -5.56494561  |
| 1421529_a_at | -0.032459838 | 9.921468999 | -0.373530857 | 0.717035431 | 0.717035431 | -5.564949142 |
| 1455544_at   | -0.027648774 | 7.407077778 | -0.373523652 | 0.717040616 | 0.717040616 | -5.564951702 |
| 1443778_at   | -0.042593042 | 3.661301686 | -0.373481127 | 0.717071222 | 0.717071222 | -5.564966812 |
| 1430325_at   | 0.031496076  | 4.186435017 | 0.373434135  | 0.717105042 | 0.717105042 | -5.564983507 |
| 1443499_at   | 0.028068247  | 3.594241237 | 0.373392923  | 0.717134703 | 0.717134703 | -5.564998147 |
| 1453763_at   | 0.037722675  | 6.760936658 | 0.373392666  | 0.717134888 | 0.717134888 | -5.564998238 |
| 1459714_at   | -0.115937781 | 4.043515224 | -0.373388653 | 0.717137777 | 0.717137777 | -5.564999664 |
| 1418320_at   | 0.034135085  | 6.151721077 | 0.373377419  | 0.717145862 | 0.717145862 | -5.565003654 |
| 1420723_at   | -0.040782193 | 5.417241945 | -0.373316407 | 0.717189774 | 0.717189774 | -5.565025323 |
| 1426714_at   | -0.031416828 | 6.084361062 | -0.373281521 | 0.717214884 | 0.717214884 | -5.565037712 |
| 1432571_at   | -0.04043873  | 3.999622677 | -0.373263707 | 0.717227706 | 0.717227706 | -5.565044038 |
| 1441290_at   | -0.036181462 | 3.986054521 | -0.373260325 | 0.71723014  | 0.71723014  | -5.565045239 |
| 1436262_x_at | 0.031601918  | 5.205449137 | 0.373259651  | 0.717230625 | 0.717230625 | -5.565045479 |
| 1421401_at   | 0.027419647  | 4.15731259  | 0.373188032  | 0.717282175 | 0.717282175 | -5.565070907 |
| 1429925_at   | 0.035112705  | 3.99813944  | 0.373170882  | 0.717294519 | 0.717294519 | -5.565076996 |
| 1420108_at   | -0.027732992 | 3.073828762 | -0.373127274 | 0.717325908 | 0.717325908 | -5.565092477 |
| 1433406_at   | -0.024917798 | 3.873333485 | -0.373107376 | 0.717340231 | 0.717340231 | -5.56509954  |
| 1418663_at   | -0.030351991 | 8.221200976 | -0.37309751  | 0.717347332 | 0.717347332 | -5.565103041 |
| 1454395_at   | -0.039630558 | 5.268303914 | -0.373028591 | 0.717396942 | 0.717396942 | -5.565127501 |
| 1427508_at   | 0.042480752  | 7.022388211 | 0.37300165   | 0.717416335 | 0.717416335 | -5.565137062 |
| 1431342_at   | -0.057454714 | 5.602287675 | -0.372990178 | 0.717424593 | 0.717424593 | -5.565141133 |
| 1450910_at   | -0.04108251  | 7.205557865 | -0.3729347   | 0.71746453  | 0.71746453  | -5.565160818 |
| 1426125_a_at | -0.052732687 | 6.288709468 | -0.372847426 | 0.717527355 | 0.717527355 | -5.565191778 |
| 1427668_at   | -0.026515308 | 3.881112608 | -0.372838788 | 0.717533574 | 0.717533574 | -5.565194842 |
| 1433414_at   | -0.033436272 | 3.898901341 | -0.372816575 | 0.717549565 | 0.717549565 | -5.565202721 |
| 1419742_at   | -0.02805266  | 6.888000203 | -0.372773288 | 0.717580727 | 0.717580727 | -5.565218073 |
| 1447529_at   | 0.033334496  | 3.51409594  | 0.372741221  | 0.717603813 | 0.717603813 | -5.565229445 |
| 1432638_at   | -0.038558791 | 5.20838388  | -0.372704594 | 0.717630181 | 0.717630181 | -5.565242433 |
| 1418369_at   | 0.02704979   | 9.78563336  | 0.372630768  | 0.717683331 | 0.717683331 | -5.565268608 |
| 1448383_at   | 0.029541329  | 10.76697404 | 0.372573576  | 0.717724507 | 0.717724507 | -5.565288882 |
| 1434952_at   | 0.025160947  | 7.242457449 | 0.372554636  | 0.717738144 | 0.717738144 | -5.565295595 |
| 1417698_at   | 0.028396942  | 8.813215736 | 0.37253835   | 0.717749869 | 0.717749869 | -5.565301367 |
| 1429055_at   | 0.040438951  | 6.519454063 | 0.372492085  | 0.717783179 | 0.717783179 | -5.565317764 |
| 1418160_at   | 0.04423269   | 5.908803695 | 0.372491863  | 0.717783339 | 0.717783339 | -5.565317842 |
| 1422620_s_at | 0.025400694  | 8.711513786 | 0.372471146  | 0.717798255 | 0.717798255 | -5.565325184 |
| 1417819_at   | -0.029056556 | 7.773489161 | -0.372466384 | 0.717801684 | 0.717801684 | -5.565326872 |
| 1447066_at   | 0.028919701  | 3.672895894 | 0.372463959  | 0.71780343  | 0.71780343  | -5.565327731 |
| 1441422_at   | 0.022828038  | 3.95553675  | 0.372427069  | 0.717829991 | 0.717829991 | -5.565340803 |
| 1428793_at   | -0.025014582 | 7.057111918 | -0.372419146 | 0.717835696 | 0.717835696 | -5.56534361  |
| 1436046_x_at | 0.023741568  | 12.76114926 | 0.372408399  | 0.717843433 | 0.717843433 | -5.565347418 |
| 1437754_at   | -0.033553471 | 4.285077165 | -0.372342221 | 0.717891083 | 0.717891083 | -5.565370863 |
| 1455148_at   | 0.03953093   | 3.900546147 | 0.372289238  | 0.717929233 | 0.717929233 | -5.565389631 |
| 1416508_at   | 0.029007824  | 10.30279915 | 0.372242255  | 0.717963064 | 0.717963064 | -5.565406271 |
| 1457510_at   | -0.031503335 | 7.884957366 | -0.372222992 | 0.717976934 | 0.717976934 | -5.565413093 |

|              |              |             |              |             |             |              |
|--------------|--------------|-------------|--------------|-------------|-------------|--------------|
| 1455097_at   | 0.027146973  | 7.25238751  | 0.372015692  | 0.718126211 | 0.718126211 | -5.565486486 |
| 1456266_at   | -0.05379219  | 5.100962489 | -0.371989261 | 0.718145245 | 0.718145245 | -5.565495841 |
| 1430689_at   | -0.042600386 | 4.090131465 | -0.371930758 | 0.718187375 | 0.718187375 | -5.565516545 |
| 1435567_at   | -0.025278383 | 7.632982377 | -0.371924634 | 0.718191785 | 0.718191785 | -5.565518712 |
| 1416943_at   | 0.033981605  | 10.52327568 | 0.371889087  | 0.718217385 | 0.718217385 | -5.56553129  |
| 1432111_at   | -0.035003748 | 5.941092029 | -0.371881048 | 0.718223175 | 0.718223175 | -5.565534135 |
| 1453886_a_at | -0.049771496 | 5.262047372 | -0.371822392 | 0.718265417 | 0.718265417 | -5.565554887 |
| 1459400_at   | 0.047889226  | 4.021017179 | 0.371800527  | 0.718281164 | 0.718281164 | -5.565562622 |
| 1435933_at   | -0.029266152 | 3.909451214 | -0.371796497 | 0.718284067 | 0.718284067 | -5.565564048 |
| 1453730_at   | -0.027910634 | 4.254403344 | -0.371779813 | 0.718296082 | 0.718296082 | -5.565569949 |
| 1433126_at   | 0.026999925  | 4.694010873 | 0.37173167   | 0.718330755 | 0.718330755 | -5.565586978 |
| 1427368_x_at | 0.034172623  | 7.522684707 | 0.371711632  | 0.718345187 | 0.718345187 | -5.565594065 |
| 1451158_at   | -0.027933763 | 7.674794659 | -0.371706593 | 0.718348816 | 0.718348816 | -5.565595847 |
| 1421952_at   | 0.037029635  | 10.79221768 | 0.371700536  | 0.718353178 | 0.718353178 | -5.565597989 |
| 1427280_at   | -0.045621813 | 4.325519566 | -0.371692432 | 0.718359015 | 0.718359015 | -5.565600855 |
| 1446561_at   | -0.03902889  | 4.03234216  | -0.371691534 | 0.718359662 | 0.718359662 | -5.565601173 |
| 1434697_at   | -0.043906638 | 9.6136233   | -0.371677267 | 0.718369937 | 0.718369937 | -5.565606218 |
| 1415829_at   | 0.027089058  | 10.23442027 | 0.371643343  | 0.71839437  | 0.71839437  | -5.565618214 |
| 1438872_at   | -0.030209244 | 3.266239617 | -0.371557454 | 0.718456232 | 0.718456232 | -5.565648582 |
| 1433766_at   | 0.028797192  | 8.639541987 | 0.371536482  | 0.718471337 | 0.718471337 | -5.565655995 |
| 1417113_at   | -0.031594325 | 9.700221649 | -0.371461625 | 0.718525256 | 0.718525256 | -5.565682455 |
| 1457698_at   | 0.022889774  | 3.09728777  | 0.371418084  | 0.718556618 | 0.718556618 | -5.565697844 |
| 1429720_at   | -0.024458943 | 9.950188962 | -0.371416375 | 0.718557849 | 0.718557849 | -5.565698447 |
| 1440950_at   | -0.041102396 | 6.060783284 | -0.371386183 | 0.718579597 | 0.718579597 | -5.565709117 |
| 1435407_at   | 0.035527377  | 7.403733479 | 0.371349167  | 0.71860626  | 0.71860626  | -5.565722196 |
| 1431065_at   | 0.030923752  | 6.562545782 | 0.37134416   | 0.718609867 | 0.718609867 | -5.565723965 |
| 1416647_at   | -0.026967759 | 7.997886612 | -0.371338937 | 0.718613629 | 0.718613629 | -5.565725811 |
| 1453314_x_at | 0.059079966  | 8.473419721 | 0.37131646   | 0.71862982  | 0.71862982  | -5.565733752 |
| 1428051_a_at | 0.045478273  | 5.957353124 | 0.371263303  | 0.718668111 | 0.718668111 | -5.565752532 |
| 1435485_at   | 0.030806039  | 6.566392895 | 0.37126307   | 0.718668279 | 0.718668279 | -5.565752614 |
| 1424196_at   | 0.027952846  | 8.836768272 | 0.371251049  | 0.718676938 | 0.718676938 | -5.56575686  |
| 1454053_at   | -0.031367556 | 4.036935773 | -0.371225162 | 0.718695586 | 0.718695586 | -5.565766004 |
| 1425261_at   | 0.050118151  | 5.792614809 | 0.371184188  | 0.718725102 | 0.718725102 | -5.565780477 |
| 1417253_at   | -0.030595909 | 8.657432214 | -0.371140601 | 0.718756502 | 0.718756502 | -5.56579587  |
| 1442299_at   | 0.035120561  | 6.010044066 | 0.371135518  | 0.718760163 | 0.718760163 | -5.565797665 |
| 1434997_at   | 0.031812834  | 7.692589955 | 0.371117352  | 0.71877325  | 0.71877325  | -5.56580408  |
| 1443829_x_at | -0.056880878 | 5.299766648 | -0.371087316 | 0.718794887 | 0.718794887 | -5.565814685 |
| 1422265_at   | -0.030180324 | 5.132881571 | -0.371082793 | 0.718798146 | 0.718798146 | -5.565816282 |
| 1436353_at   | 0.03137041   | 8.956725009 | 0.37105256   | 0.718819926 | 0.718819926 | -5.565826957 |
| 1458243_at   | 0.037566554  | 3.430535519 | 0.371040984  | 0.718828265 | 0.718828265 | -5.565831044 |
| 1423964_at   | -0.026536606 | 8.46847199  | -0.371028488 | 0.718837268 | 0.718837268 | -5.565835456 |
| 1441958_s_at | 0.053566815  | 6.725611505 | 0.371016615  | 0.718845821 | 0.718845821 | -5.565839647 |
| 1424325_at   | 0.054904477  | 7.108634645 | 0.371007405  | 0.718852457 | 0.718852457 | -5.565842899 |
| 1444742_at   | 0.024064084  | 4.152922165 | 0.370993305  | 0.718862615 | 0.718862615 | -5.565847876 |
| 1440815_x_at | -0.082937949 | 4.392160688 | -0.370963231 | 0.718884281 | 0.718884281 | -5.565858492 |
| 1439381_x_at | -0.038082499 | 10.79920788 | -0.370931282 | 0.718907298 | 0.718907298 | -5.565869769 |
| 1437964_at   | -0.023280779 | 3.342655914 | -0.370927545 | 0.718909991 | 0.718909991 | -5.565871088 |
| 1442067_at   | -0.037627949 | 8.602829368 | -0.370900744 | 0.718929299 | 0.718929299 | -5.565880547 |
| 1418271_at   | 0.072294109  | 7.31176006  | 0.370839697  | 0.718973281 | 0.718973281 | -5.56590209  |
| 1423454_a_at | -0.057679257 | 6.520098116 | -0.370788183 | 0.719010396 | 0.719010396 | -5.565920266 |
| 1450674_at   | -0.028477852 | 8.813680197 | -0.370766461 | 0.719026047 | 0.719026047 | -5.56592793  |
| 1422970_at   | 0.040066964  | 7.031171798 | 0.370694183  | 0.719078123 | 0.719078123 | -5.565953427 |
| 1417277_at   | -0.022914267 | 7.314589104 | -0.370634078 | 0.71912143  | 0.71912143  | -5.565974626 |



|              |              |             |              |             |             |              |
|--------------|--------------|-------------|--------------|-------------|-------------|--------------|
| 1453107_s_at | -0.053807321 | 7.856857702 | -0.370615241 | 0.719135003 | 0.719135003 | -5.565981269 |
| 1440013_at   | -0.036392229 | 8.279930142 | -0.370614885 | 0.71913526  | 0.71913526  | -5.565981395 |
| 1447777_x_at | -0.023215746 | 3.524741901 | -0.370562719 | 0.719172848 | 0.719172848 | -5.56599979  |
| 1453588_at   | -0.040765756 | 4.213498173 | -0.370553881 | 0.719179216 | 0.719179216 | -5.566002907 |
| 1430456_at   | -0.025603752 | 3.594880221 | -0.37050909  | 0.71921149  | 0.71921149  | -5.566018699 |
| 1451759_at   | -0.07114155  | 4.012738535 | -0.370494072 | 0.719222312 | 0.719222312 | -5.566023993 |
| 1421599_at   | -0.056770387 | 4.632428373 | -0.370449775 | 0.719254232 | 0.719254232 | -5.56603961  |
| 1432507_at   | -0.060344295 | 4.80731059  | -0.370438899 | 0.719262069 | 0.719262069 | -5.566043443 |
| 1446139_at   | -0.042578619 | 5.618650216 | -0.370414795 | 0.719279438 | 0.719279438 | -5.566051939 |
| 1427750_at   | 0.030178043  | 3.539473993 | 0.370383457  | 0.71930202  | 0.71930202  | -5.566062985 |
| 1446172_at   | -0.02782773  | 6.675127665 | -0.370374307 | 0.719308614 | 0.719308614 | -5.56606621  |
| 1460689_at   | -0.030183131 | 8.887712919 | -0.370373768 | 0.719309002 | 0.719309002 | -5.5660664   |
| 1438703_at   | 0.027636938  | 7.883196185 | 0.370350149  | 0.719326023 | 0.719326023 | -5.566074724 |
| 1428376_at   | -0.033677995 | 5.001600128 | -0.370330169 | 0.71934042  | 0.71934042  | -5.566081765 |
| 1448213_at   | 0.038324435  | 12.09930347 | 0.370329016  | 0.719341251 | 0.719341251 | -5.566082171 |
| 1419988_at   | -0.044873204 | 6.663664023 | -0.37031416  | 0.719351957 | 0.719351957 | -5.566087406 |
| 1436204_at   | 0.027103558  | 6.875869265 | 0.370291463  | 0.719368313 | 0.719368313 | -5.566095404 |
| 1433085_at   | 0.037975474  | 4.877468864 | 0.370288829  | 0.719370211 | 0.719370211 | -5.566096332 |
| 1440665_at   | 0.035282541  | 3.738980369 | 0.370245037  | 0.719401769 | 0.719401769 | -5.566111761 |
| 1435177_a_at | -0.026621413 | 11.4781254  | -0.370241468 | 0.719404341 | 0.719404341 | -5.566113019 |
| 1421545_a_at | -0.03038515  | 6.07011844  | -0.370237263 | 0.719407372 | 0.719407372 | -5.5661145   |
| 1457354_at   | -0.024647965 | 3.238940966 | -0.370234908 | 0.719409068 | 0.719409068 | -5.56611533  |
| 1424760_a_at | -0.037304525 | 9.680965337 | -0.370194851 | 0.719437936 | 0.719437936 | -5.566129442 |
| 1417770_s_at | 0.037171773  | 8.972269852 | 0.370178921  | 0.719449416 | 0.719449416 | -5.566135053 |
| 1421168_at   | 0.039079956  | 3.69090182  | 0.370163863  | 0.719460268 | 0.719460268 | -5.566140357 |
| 1432313_at   | -0.032923062 | 4.854999068 | -0.370130518 | 0.719484299 | 0.719484299 | -5.566152102 |
| 1455683_a_at | -0.050976857 | 4.7840477   | -0.370098841 | 0.719507128 | 0.719507128 | -5.566163259 |
| 1432692_at   | -0.032688214 | 4.190957851 | -0.37009778  | 0.719507892 | 0.719507892 | -5.566163633 |
| 1435347_at   | 0.029072158  | 7.541022792 | 0.370075691  | 0.719523812 | 0.719523812 | -5.566171412 |
| 1460218_at   | -0.064799449 | 6.438627595 | -0.370028947 | 0.7195575   | 0.7195575   | -5.566187872 |
| 1435090_at   | 0.056488493  | 6.657215144 | 0.370008164  | 0.719572479 | 0.719572479 | -5.56619519  |
| 1455809_x_at | 0.055398153  | 8.065846363 | 0.36996565   | 0.719603119 | 0.719603119 | -5.566210158 |
| 1456142_x_at | -0.024760035 | 13.11412772 | -0.369950816 | 0.719613811 | 0.719613811 | -5.566215381 |
| 1422506_a_at | -0.024526101 | 11.27542463 | -0.369922007 | 0.719634575 | 0.719634575 | -5.566225523 |
| 1427047_at   | 0.039596217  | 8.236741992 | 0.369821056  | 0.719707336 | 0.719707336 | -5.566261055 |
| 1437119_at   | 0.032407697  | 7.936953828 | 0.369809509  | 0.719715658 | 0.719715658 | -5.566265118 |
| 1445332_at   | 0.030245614  | 3.515683868 | 0.369761264  | 0.719750432 | 0.719750432 | -5.566282095 |
| 1453333_at   | 0.033515589  | 4.428223745 | 0.369641333  | 0.719836879 | 0.719836879 | -5.566324289 |
| 1437232_at   | -0.023743492 | 3.201324623 | -0.369615368 | 0.719855595 | 0.719855595 | -5.566333422 |
| 1442341_at   | -0.048468796 | 4.588622837 | -0.3695531   | 0.719900481 | 0.719900481 | -5.566355322 |
| 1424088_at   | -0.02278753  | 8.835179782 | -0.369477417 | 0.719955037 | 0.719955037 | -5.566381936 |
| 1455597_at   | 0.040389811  | 7.229489599 | 0.369384113  | 0.720022299 | 0.720022299 | -5.566414739 |
| 1460377_a_at | 0.028524192  | 5.329872921 | 0.36934617   | 0.720049652 | 0.720049652 | -5.566428076 |
| 1433472_x_at | -0.023080531 | 13.36813738 | -0.369302365 | 0.720081231 | 0.720081231 | -5.566443472 |
| 1450559_at   | 0.037764753  | 6.723522609 | 0.369290088  | 0.720090082 | 0.720090082 | -5.566447787 |
| 1423197_a_at | -0.025593865 | 8.583686852 | -0.369252119 | 0.720117455 | 0.720117455 | -5.56646113  |
| 1430252_at   | 0.03736251   | 4.554587871 | 0.369243036  | 0.720124003 | 0.720124003 | -5.566464321 |
| 1459970_at   | -0.027030901 | 5.635763816 | -0.369233014 | 0.720131228 | 0.720131228 | -5.566467843 |
| 1452231_x_at | 0.054977656  | 5.817458204 | 0.369213295  | 0.720145444 | 0.720145444 | -5.566474772 |
| 1428568_at   | -0.046021696 | 7.562577257 | -0.369156445 | 0.720186431 | 0.720186431 | -5.566494745 |
| 1451231_a_at | 0.02551516   | 9.524732476 | 0.369151927  | 0.720189688 | 0.720189688 | -5.566496333 |
| 1456817_at   | -0.037348858 | 4.432787741 | -0.369128181 | 0.720206808 | 0.720206808 | -5.566504675 |
| 1422626_at   | -0.027041926 | 8.863889688 | -0.369109798 | 0.720220062 | 0.720220062 | -5.566511132 |

|              |              |             |              |             |             |              |
|--------------|--------------|-------------|--------------|-------------|-------------|--------------|
| 1444322_at   | 0.04396374   | 4.191264404 | 0.369053488  | 0.72026066  | 0.72026066  | -5.566530911 |
| 1425249_a_at | 0.037865716  | 6.720681903 | 0.369012288  | 0.720290365 | 0.720290365 | -5.56654538  |
| 1437171_x_at | -0.069235553 | 11.24684914 | -0.369009446 | 0.720292415 | 0.720292415 | -5.566546379 |
| 1431936_a_at | -0.031421627 | 4.197416407 | -0.368947449 | 0.720337115 | 0.720337115 | -5.566568149 |
| 1436094_at   | 0.041837946  | 5.524237535 | 0.368923508  | 0.720354378 | 0.720354378 | -5.566576555 |
| 1420399_at   | 0.025148099  | 4.841736337 | 0.368917218  | 0.720358913 | 0.720358913 | -5.566578763 |
| 1419911_at   | 0.047036245  | 5.396958198 | 0.368850292  | 0.720407169 | 0.720407169 | -5.566602258 |
| 1443459_at   | 0.032337264  | 3.769146912 | 0.36878859   | 0.72045166  | 0.72045166  | -5.566623916 |
| 1459858_x_at | 0.032426554  | 3.597908015 | 0.368739293  | 0.720487207 | 0.720487207 | -5.566641217 |
| 1451805_at   | 0.042357884  | 7.052211964 | 0.3687379    | 0.720488211 | 0.720488211 | -5.566641706 |
| 1439935_at   | 0.027044975  | 3.835602262 | 0.368702106  | 0.720514022 | 0.720514022 | -5.566654267 |
| 1452355_at   | -0.024295567 | 4.800102512 | -0.368673291 | 0.7205348   | 0.7205348   | -5.566664377 |
| 1426691_at   | -0.029698458 | 8.825165337 | -0.368670546 | 0.72053678  | 0.72053678  | -5.56666534  |
| 1417183_at   | 0.028689903  | 9.404871828 | 0.368627441  | 0.720567864 | 0.720567864 | -5.566680464 |
| 1438638_x_at | -0.044741926 | 6.354770451 | -0.368588629 | 0.720595851 | 0.720595851 | -5.566694079 |
| 1459003_at   | -0.030495438 | 5.300102308 | -0.368527308 | 0.720640072 | 0.720640072 | -5.566715588 |
| 1449451_at   | 0.081728711  | 8.106060577 | 0.368462847  | 0.720686558 | 0.720686558 | -5.566738195 |
| 1432661_at   | -0.02423614  | 3.468956361 | -0.368421135 | 0.72071664  | 0.72071664  | -5.566752822 |
| 1424682_at   | 0.029100121  | 8.156130881 | 0.368363439  | 0.720758249 | 0.720758249 | -5.566773051 |
| 1432429_at   | 0.026959018  | 3.583927756 | 0.368362635  | 0.720758829 | 0.720758829 | -5.566773332 |
| 1459995_at   | 0.033316222  | 3.355474748 | 0.368330893  | 0.720781721 | 0.720781721 | -5.56678446  |
| 1438710_at   | -0.029103471 | 5.225515874 | -0.368301166 | 0.72080316  | 0.72080316  | -5.566794881 |
| 1438422_at   | 0.028001265  | 6.859140667 | 0.368270752  | 0.720825095 | 0.720825095 | -5.566805541 |
| 1439450_x_at | 0.053275412  | 8.80249401  | 0.368066832  | 0.720972173 | 0.720972173 | -5.566876996 |
| 1427578_a_at | -0.027002598 | 9.995649002 | -0.368066157 | 0.72097266  | 0.72097266  | -5.566877232 |
| 1450762_s_at | -0.037605198 | 6.145037845 | -0.36805746  | 0.720978932 | 0.720978932 | -5.566880279 |
| 1426213_at   | -0.025402915 | 8.175494374 | -0.368035909 | 0.720994477 | 0.720994477 | -5.566887828 |
| 1455855_x_at | 0.029146665  | 12.56834213 | 0.368027237  | 0.721000732 | 0.721000732 | -5.566890866 |
| 1433910_at   | 0.02311294   | 9.341883592 | 0.368019972  | 0.721005972 | 0.721005972 | -5.56689341  |
| 1416435_at   | -0.035523403 | 8.013036881 | -0.368000749 | 0.721019838 | 0.721019838 | -5.566900144 |
| 1422483_a_at | 0.023873372  | 10.8317317  | 0.36794878   | 0.721057323 | 0.721057323 | -5.566918344 |
| 1447782_x_at | -0.023859329 | 3.164906078 | -0.367940279 | 0.721063455 | 0.721063455 | -5.566921321 |
| 1432794_at   | 0.03563007   | 3.376856776 | 0.367844597  | 0.721132473 | 0.721132473 | -5.566954824 |
| 1437470_at   | 0.029626299  | 8.539272537 | 0.367766151  | 0.72118906  | 0.72118906  | -5.566982286 |
| 1432994_at   | 0.026479432  | 3.517628954 | 0.367733558  | 0.721212572 | 0.721212572 | -5.566993694 |
| 1441833_at   | -0.037751664 | 4.561359202 | -0.367732938 | 0.721213019 | 0.721213019 | -5.566993911 |
| 1424285_s_at | -0.02412093  | 9.557939453 | -0.367722969 | 0.721220211 | 0.721220211 | -5.5669974   |
| 1443967_at   | -0.031493361 | 4.506735296 | -0.367712455 | 0.721227795 | 0.721227795 | -5.56700108  |
| 1458123_at   | 0.030153323  | 4.540618045 | 0.367697349  | 0.721238693 | 0.721238693 | -5.567006367 |
| 1430349_at   | 0.02779283   | 4.032993961 | 0.367614818  | 0.72129823  | 0.72129823  | -5.567035247 |
| 1418686_at   | 0.02437933   | 3.94642176  | 0.367546705  | 0.721347368 | 0.721347368 | -5.567059077 |
| 1456568_at   | 0.028868746  | 3.612742872 | 0.367537373  | 0.7213541   | 0.7213541   | -5.567062342 |
| 1445389_at   | 0.03042295   | 3.260756959 | 0.3675222    | 0.721365047 | 0.721365047 | -5.56706765  |
| 1449547_at   | -0.035730307 | 3.3961606   | -0.367508156 | 0.721375178 | 0.721375178 | -5.567072562 |
| 1448938_at   | 0.025677228  | 9.536499891 | 0.367459129  | 0.721410549 | 0.721410549 | -5.567089711 |
| 1454954_at   | -0.041628372 | 6.210346549 | -0.367418712 | 0.721439708 | 0.721439708 | -5.567103846 |
| 1448848_at   | 0.028480193  | 9.408833104 | 0.367412726  | 0.721444027 | 0.721444027 | -5.567105939 |
| 1444712_at   | -0.028005659 | 3.745665404 | -0.367306985 | 0.721520317 | 0.721520317 | -5.567142913 |
| 1444170_at   | 0.047375288  | 4.49791715  | 0.367289288  | 0.721533086 | 0.721533086 | -5.5671491   |
| 1418310_a_at | -0.029572564 | 3.531030913 | -0.36727986  | 0.721539888 | 0.721539888 | -5.567152395 |
| 1424570_at   | -0.023163578 | 7.702199047 | -0.3672317   | 0.721574636 | 0.721574636 | -5.56716923  |
| 1434806_at   | 0.026539658  | 7.907741687 | 0.367205302  | 0.721593683 | 0.721593683 | -5.567178457 |
| 1440621_at   | -0.0410307   | 4.494129801 | -0.367101543 | 0.721668549 | 0.721668549 | -5.567214718 |

|              |              |             |              |             |             |              |
|--------------|--------------|-------------|--------------|-------------|-------------|--------------|
| 1437358_at   | -0.024222468 | 9.157271623 | -0.36709434  | 0.721673747 | 0.721673747 | -5.567217235 |
| 1421482_at   | -0.044025072 | 5.184630122 | -0.367090769 | 0.721676324 | 0.721676324 | -5.567218483 |
| 1453688_at   | 0.053012539  | 6.699912958 | 0.367077725  | 0.721685736 | 0.721685736 | -5.56722304  |
| 1418486_at   | -0.053234455 | 5.236470959 | -0.367076499 | 0.72168662  | 0.72168662  | -5.567223469 |
| 1447865_x_at | 0.025315058  | 8.935311575 | 0.367062392  | 0.721696799 | 0.721696799 | -5.567228397 |
| 1429377_at   | 0.02381384   | 4.847137472 | 0.367026612  | 0.721722617 | 0.721722617 | -5.567240898 |
| 1417688_at   | 0.024449939  | 5.780941558 | 0.367009873  | 0.721734696 | 0.721734696 | -5.567246746 |
| 1420887_a_at | -0.042083441 | 6.7210054   | -0.366997189 | 0.721743848 | 0.721743848 | -5.567251176 |
| 1439058_at   | 0.051128545  | 8.531778942 | 0.366805203  | 0.721882388 | 0.721882388 | -5.567318225 |
| 1430070_at   | -0.027388569 | 4.73243276  | -0.366738703 | 0.721930378 | 0.721930378 | -5.567341441 |
| 1455595_at   | 0.033322553  | 3.677045136 | 0.366687827  | 0.721967093 | 0.721967093 | -5.5673592   |
| 1440169_x_at | 0.036068502  | 6.341757018 | 0.366632556  | 0.722006982 | 0.722006982 | -5.567378491 |
| 1418096_at   | 0.045343025  | 5.879003054 | 0.36662608   | 0.722011656 | 0.722011656 | -5.567380751 |
| 1442727_at   | -0.040920452 | 3.801026909 | -0.366573779 | 0.722049402 | 0.722049402 | -5.567399002 |
| 1417637_a_at | 0.030423128  | 7.398806014 | 0.36654874   | 0.722067472 | 0.722067472 | -5.567407738 |
| 1453784_at   | -0.027344476 | 6.734938467 | -0.36654575  | 0.72206963  | 0.72206963  | -5.567408781 |
| 1436726_s_at | 0.029468063  | 7.06731205  | 0.366516969  | 0.722090402 | 0.722090402 | -5.567418823 |
| 1449129_a_at | -0.030837044 | 5.659715426 | -0.366491173 | 0.72210902  | 0.72210902  | -5.567427823 |
| 1428077_at   | 0.029997709  | 5.136179187 | 0.36647375   | 0.722121595 | 0.722121595 | -5.567433901 |
| 1452673_at   | -0.025556757 | 8.783064739 | -0.366470372 | 0.722124033 | 0.722124033 | -5.567435079 |
| 1443812_x_at | -0.05446636  | 4.210115951 | -0.366459524 | 0.722131863 | 0.722131863 | -5.567438863 |
| 1431582_at   | -0.026094234 | 6.106111555 | -0.366449473 | 0.722139117 | 0.722139117 | -5.567442369 |
| 1416824_at   | 0.030270958  | 9.1081189   | 0.3664348    | 0.722149707 | 0.722149707 | -5.567447488 |
| 1446725_at   | 0.030563018  | 5.29181172  | 0.366400831  | 0.722174224 | 0.722174224 | -5.567459335 |
| 1450209_at   | -0.049331474 | 4.127445357 | -0.366355244 | 0.722207127 | 0.722207127 | -5.567475234 |
| 1435834_at   | 0.035379028  | 7.394360568 | 0.366302994  | 0.72224484  | 0.72224484  | -5.567493454 |
| 1441332_at   | -0.02884091  | 5.450210035 | -0.366275004 | 0.722265043 | 0.722265043 | -5.567503214 |
| 1417586_at   | 0.031344198  | 8.927744211 | 0.366258648  | 0.722276849 | 0.722276849 | -5.567508916 |
| 1447306_at   | 0.034097133  | 3.618864956 | 0.366254647  | 0.722279737 | 0.722279737 | -5.567510311 |
| 1437058_at   | 0.042819691  | 7.055051541 | 0.366236693  | 0.722292696 | 0.722292696 | -5.56751657  |
| 1440881_at   | -0.034347615 | 6.20763197  | -0.366201927 | 0.72231779  | 0.72231779  | -5.56752869  |
| 1441987_at   | 0.035918498  | 8.765495011 | 0.366200118  | 0.722319096 | 0.722319096 | -5.567529321 |
| 1451184_at   | 0.023665627  | 11.88408058 | 0.366199896  | 0.722319257 | 0.722319257 | -5.567529398 |
| 1419439_at   | -0.029756966 | 6.57032249  | -0.366167382 | 0.722342726 | 0.722342726 | -5.567540732 |
| 1454257_at   | 0.031301568  | 5.777546307 | 0.366139298  | 0.722362998 | 0.722362998 | -5.56755052  |
| 1426529_a_at | -0.023882644 | 9.629666188 | -0.366027906 | 0.722443406 | 0.722443406 | -5.567589339 |
| 1438925_x_at | 0.02609734   | 11.18681737 | 0.366014709  | 0.722452932 | 0.722452932 | -5.567593937 |
| 1436298_x_at | 0.067499713  | 9.226553675 | 0.366005488  | 0.722459589 | 0.722459589 | -5.56759715  |
| 1443528_at   | 0.032851349  | 5.732427185 | 0.36595007   | 0.722499594 | 0.722499594 | -5.567616456 |
| 1431517_at   | 0.047084191  | 3.567510909 | 0.365935423  | 0.722510168 | 0.722510168 | -5.567621559 |
| 1444637_at   | -0.028619781 | 6.037906657 | -0.365869965 | 0.722557422 | 0.722557422 | -5.567644359 |
| 1459763_at   | -0.029370083 | 3.727329536 | -0.365858159 | 0.722565945 | 0.722565945 | -5.567648471 |
| 1416207_at   | -0.0225813   | 9.170908035 | -0.365773821 | 0.722626831 | 0.722626831 | -5.56767784  |
| 1445790_at   | -0.02388461  | 4.123925192 | -0.365721962 | 0.722664271 | 0.722664271 | -5.567695896 |
| 1451634_at   | -0.027782475 | 9.190186198 | -0.365701187 | 0.722679269 | 0.722679269 | -5.567703129 |
| 1456047_at   | -0.059841358 | 5.724370149 | -0.365661257 | 0.722708097 | 0.722708097 | -5.567717029 |
| 1435196_at   | 0.03551773   | 7.715050251 | 0.365659362  | 0.722709466 | 0.722709466 | -5.567717689 |
| 1416432_at   | -0.028880267 | 6.579947763 | -0.365611886 | 0.722743742 | 0.722743742 | -5.567734213 |
| 1428034_a_at | 0.030799049  | 3.53503181  | 0.365471195  | 0.722845322 | 0.722845322 | -5.567783172 |
| 1448871_at   | -0.02597834  | 8.471045745 | -0.365466972 | 0.722848371 | 0.722848371 | -5.567784641 |
| 1457279_at   | -0.026990153 | 5.67813319  | -0.365424699 | 0.722878894 | 0.722878894 | -5.567799347 |
| 1451164_a_at | -0.02698276  | 8.309907255 | -0.365410864 | 0.722888883 | 0.722888883 | -5.56780416  |
| 1420008_s_at | 0.047951828  | 8.366032186 | 0.365409826  | 0.722889633 | 0.722889633 | -5.567804522 |

|              |              |             |              |             |             |              |
|--------------|--------------|-------------|--------------|-------------|-------------|--------------|
| 1440736_at   | 0.044365867  | 7.422017906 | 0.365382386  | 0.722909446 | 0.722909446 | -5.567814066 |
| 1449536_at   | 0.031776576  | 5.587197241 | 0.365365924  | 0.722921332 | 0.722921332 | -5.567819792 |
| 1434736_at   | 0.02522378   | 6.095276113 | 0.365333035  | 0.72294508  | 0.72294508  | -5.567831232 |
| 1452237_at   | 0.026529788  | 8.724678474 | 0.365294575  | 0.722972851 | 0.722972851 | -5.567844607 |
| 1452596_at   | 0.028860979  | 9.365244532 | 0.365282735  | 0.722981401 | 0.722981401 | -5.567848724 |
| 1422878_at   | -0.025258751 | 5.492217098 | -0.365272762 | 0.722988602 | 0.722988602 | -5.567852192 |
| 1416058_s_at | 0.026113699  | 12.12181544 | 0.36520266   | 0.723039222 | 0.723039222 | -5.567876567 |
| 1421418_a_at | -0.025149127 | 3.016334278 | -0.365176066 | 0.723058426 | 0.723058426 | -5.567885813 |
| 1425192_at   | -0.035658933 | 6.393177159 | -0.365155144 | 0.723073534 | 0.723073534 | -5.567893086 |
| 1440182_at   | 0.028822767  | 3.602819751 | 0.36514085   | 0.723083856 | 0.723083856 | -5.567898055 |
| 1440794_x_at | 0.02317609   | 3.156469086 | 0.365139921  | 0.723084527 | 0.723084527 | -5.567898378 |
| 1453000_at   | 0.028083053  | 8.656100594 | 0.365118397  | 0.72310007  | 0.72310007  | -5.567905859 |
| 1439343_at   | -0.03791714  | 3.7382279   | -0.365003865 | 0.723182779 | 0.723182779 | -5.567945664 |
| 1432977_at   | 0.028505621  | 3.064073989 | 0.364979557  | 0.723200333 | 0.723200333 | -5.56795411  |
| 1447333_at   | 0.030213848  | 3.462116391 | 0.364907425  | 0.723252426 | 0.723252426 | -5.567979172 |
| 1427366_at   | 0.029819831  | 5.560792964 | 0.364865904  | 0.723282412 | 0.723282412 | -5.567993595 |
| 1460383_at   | -0.059566231 | 5.909882687 | -0.364827327 | 0.723310272 | 0.723310272 | -5.568006994 |
| 1449492_a_at | -0.046453726 | 5.081151081 | -0.364787909 | 0.723338741 | 0.723338741 | -5.568020685 |
| 1430084_at   | 0.029025726  | 4.659537594 | 0.364771547  | 0.723350558 | 0.723350558 | -5.568026367 |
| 1449584_at   | -0.030695809 | 4.625075167 | -0.364759849 | 0.723359006 | 0.723359006 | -5.568030429 |
| 1428307_at   | -0.024074173 | 8.402787427 | -0.364744385 | 0.723370175 | 0.723370175 | -5.568035799 |
| 1449421_a_at | 0.025560106  | 3.724097357 | 0.364737034  | 0.723375484 | 0.723375484 | -5.568038352 |
| 1436324_at   | -0.038367842 | 7.143809262 | -0.364729186 | 0.723381152 | 0.723381152 | -5.568041077 |
| 1418119_at   | 0.024792391  | 10.52088342 | 0.364602775  | 0.723472454 | 0.723472454 | -5.568084964 |
| 1456798_at   | 0.032906131  | 5.831688681 | 0.364584616  | 0.72348557  | 0.72348557  | -5.568091267 |
| 1456055_x_at | 0.054409684  | 8.706513565 | 0.364580336  | 0.723488661 | 0.723488661 | -5.568092752 |
| 1420085_at   | 0.038213119  | 3.930520618 | 0.364528562  | 0.723526057 | 0.723526057 | -5.568110722 |
| 1459465_at   | 0.02319391   | 3.335438547 | 0.364507946  | 0.723540948 | 0.723540948 | -5.568117876 |
| 1442989_at   | -0.054472279 | 6.318475418 | -0.36449969  | 0.723546911 | 0.723546911 | -5.568120741 |
| 1417475_at   | 0.023847489  | 9.346030017 | 0.364488129  | 0.723555262 | 0.723555262 | -5.568124754 |
| 1452781_a_at | 0.038861718  | 9.278985389 | 0.364465267  | 0.723571775 | 0.723571775 | -5.568132687 |
| 1421687_at   | -0.034356635 | 3.6455059   | -0.364424172 | 0.723601459 | 0.723601459 | -5.568146945 |
| 1446309_at   | 0.022709499  | 4.380392204 | 0.364383018  | 0.723631186 | 0.723631186 | -5.568161223 |
| 1443407_at   | 0.042611151  | 5.236445309 | 0.364244153  | 0.723731496 | 0.723731496 | -5.568209389 |
| 1418556_at   | 0.030699894  | 3.511949096 | 0.364208313  | 0.723757387 | 0.723757387 | -5.568221817 |
| 1442863_at   | 0.025110113  | 3.605058846 | 0.36418283   | 0.723775796 | 0.723775796 | -5.568230653 |
| 1444077_at   | -0.036639082 | 3.991675379 | -0.364181412 | 0.72377682  | 0.72377682  | -5.568231144 |
| 1456204_at   | 0.024692805  | 8.419051345 | 0.364162426  | 0.723790536 | 0.723790536 | -5.568237727 |
| 1440783_at   | 0.030673339  | 5.498841416 | 0.364041889  | 0.723877614 | 0.723877614 | -5.568279512 |
| 1424988_at   | 0.029234623  | 10.80496412 | 0.364025592  | 0.723889387 | 0.723889387 | -5.568285161 |
| 1457505_at   | -0.045660847 | 5.919982855 | -0.364004524 | 0.723904608 | 0.723904608 | -5.568292462 |
| 1458541_at   | -0.026442911 | 5.52644696  | -0.363948771 | 0.723944887 | 0.723944887 | -5.568311783 |
| 1432815_at   | 0.028200287  | 3.326663188 | 0.36387755   | 0.723996343 | 0.723996343 | -5.56833646  |
| 1447805_s_at | 0.029774112  | 7.401370958 | 0.363849539  | 0.72401658  | 0.72401658  | -5.568346164 |
| 1433618_at   | -0.027703038 | 7.798575569 | -0.36380534  | 0.724048514 | 0.724048514 | -5.568361475 |
| 1429068_at   | -0.041364258 | 4.530469247 | -0.363800943 | 0.724051691 | 0.724051691 | -5.568362998 |
| 1437706_x_at | 0.024740761  | 13.49467816 | 0.363770883  | 0.72407341  | 0.72407341  | -5.56837341  |
| 1419020_at   | -0.041998086 | 3.846221881 | -0.36371055  | 0.724117002 | 0.724117002 | -5.568394304 |
| 1442461_at   | 0.025341195  | 4.20974698  | 0.363708521  | 0.724118467 | 0.724118467 | -5.568395007 |
| 1454797_at   | 0.023771605  | 8.791793968 | 0.363689797  | 0.724131997 | 0.724131997 | -5.568401491 |
| 1454273_at   | -0.041066247 | 3.88299061  | -0.363651053 | 0.724159991 | 0.724159991 | -5.568414906 |
| 1431548_at   | 0.030000355  | 3.937259712 | 0.36364201   | 0.724166525 | 0.724166525 | -5.568418037 |
| 1421132_at   | 0.035997305  | 4.676578997 | 0.363607769  | 0.724191266 | 0.724191266 | -5.568429892 |

|              |              |             |              |             |             |              |
|--------------|--------------|-------------|--------------|-------------|-------------|--------------|
| 1456249_x_at | -0.041561187 | 4.985985293 | -0.363600092 | 0.724196813 | 0.724196813 | -5.56843255  |
| 1456889_at   | -0.041731994 | 4.002049155 | -0.363549058 | 0.724233689 | 0.724233689 | -5.568450216 |
| 1459089_at   | 0.031474958  | 4.245728445 | 0.363534495  | 0.724244212 | 0.724244212 | -5.568455257 |
| 1437493_at   | 0.029141944  | 7.357169506 | 0.363523576  | 0.724252102 | 0.724252102 | -5.568459036 |
| 1444414_at   | -0.045201113 | 4.926970358 | -0.363500434 | 0.724268824 | 0.724268824 | -5.568467046 |
| 1456833_at   | 0.031772522  | 5.963864623 | 0.363481434  | 0.724282553 | 0.724282553 | -5.568473622 |
| 1419782_at   | 0.02814975   | 3.311759236 | 0.363465746  | 0.724293889 | 0.724293889 | -5.568479051 |
| 1456282_at   | 0.041409294  | 6.710332711 | 0.363458957  | 0.724298795 | 0.724298795 | -5.568481401 |
| 1445594_at   | 0.028177841  | 5.289545254 | 0.363442031  | 0.724311026 | 0.724311026 | -5.568487258 |
| 1415869_a_at | -0.041660073 | 11.48530951 | -0.363398263 | 0.724342653 | 0.724342653 | -5.568502403 |
| 1432373_at   | -0.041292759 | 5.270605096 | -0.363375388 | 0.724359184 | 0.724359184 | -5.568510317 |
| 1442581_at   | 0.036717994  | 5.633031116 | 0.363364563  | 0.724367006 | 0.724367006 | -5.568514063 |
| 1428850_x_at | -0.097242281 | 7.996172315 | -0.363339517 | 0.724385105 | 0.724385105 | -5.568522728 |
| 1423398_at   | -0.024879747 | 8.309828806 | -0.363246184 | 0.724452552 | 0.724452552 | -5.568555013 |
| 1435186_s_at | 0.023888676  | 7.443993953 | 0.363218647  | 0.724472452 | 0.724472452 | -5.568564536 |
| 1449042_at   | 0.038800528  | 10.16042101 | 0.36317092   | 0.724506944 | 0.724506944 | -5.568581041 |
| 1433303_at   | -0.026706081 | 4.025972181 | -0.363170657 | 0.724507134 | 0.724507134 | -5.568581132 |
| 1460469_at   | -0.032634868 | 5.452003105 | -0.363153431 | 0.724519583 | 0.724519583 | -5.568587089 |
| 1437311_at   | 0.045695848  | 6.610024432 | 0.363147282  | 0.724524027 | 0.724524027 | -5.568589215 |
| 1457341_at   | 0.027142756  | 5.047114452 | 0.363113998  | 0.724548081 | 0.724548081 | -5.568600723 |
| 1436336_at   | 0.027569004  | 7.094035676 | 0.363095626  | 0.724561359 | 0.724561359 | -5.568607075 |
| 1450701_a_at | -0.029934649 | 8.410818039 | -0.3630883   | 0.724566654 | 0.724566654 | -5.568609608 |
| 1437857_at   | 0.040130987  | 6.577777652 | 0.363077269  | 0.724574625 | 0.724574625 | -5.568613421 |
| 1420642_a_at | 0.029600531  | 10.68186623 | 0.363038349  | 0.724602754 | 0.724602754 | -5.568626876 |
| 1422391_at   | -0.034087989 | 3.087747263 | -0.362976509 | 0.724647448 | 0.724647448 | -5.56864825  |
| 1416780_at   | -0.028898523 | 9.282152178 | -0.36295765  | 0.724661078 | 0.724661078 | -5.568654769 |
| 1428121_at   | -0.02740714  | 8.935543812 | -0.362956283 | 0.724662066 | 0.724662066 | -5.568655241 |
| 1458332_x_at | -0.026850805 | 5.041316935 | -0.362887923 | 0.724711474 | 0.724711474 | -5.568678864 |
| 1452309_at   | -0.023302957 | 7.52472032  | -0.362883769 | 0.724714476 | 0.724714476 | -5.568680299 |
| 1432987_at   | 0.028255514  | 4.32050803  | 0.362854227  | 0.724735828 | 0.724735828 | -5.568690506 |
| 1443272_at   | -0.028675436 | 4.729629289 | -0.362850948 | 0.724738198 | 0.724738198 | -5.568691639 |
| 1458850_at   | -0.025930941 | 4.427189247 | -0.36282788  | 0.724754871 | 0.724754871 | -5.568699609 |
| 1431099_at   | -0.045659299 | 5.718561306 | -0.362811392 | 0.724766789 | 0.724766789 | -5.568705305 |
| 1423005_a_at | 0.036666068  | 3.907845064 | 0.362602082  | 0.724918083 | 0.724918083 | -5.568777595 |
| 1444995_at   | -0.038096504 | 4.205984109 | -0.362591639 | 0.724925631 | 0.724925631 | -5.5687812   |
| 1427893_a_at | 0.027041972  | 7.690657166 | 0.362589298  | 0.724927324 | 0.724927324 | -5.568782009 |
| 1437447_s_at | 0.028536256  | 9.512596867 | 0.362588955  | 0.724927571 | 0.724927571 | -5.568782127 |
| 1445435_at   | 0.028554532  | 3.551493371 | 0.362548838  | 0.72495657  | 0.72495657  | -5.568795977 |
| 1422233_at   | -0.027299427 | 5.921581394 | -0.362514705 | 0.724981244 | 0.724981244 | -5.56880776  |
| 1456320_at   | 0.027302835  | 6.900222995 | 0.362507763  | 0.724986263 | 0.724986263 | -5.568810157 |
| 1457454_at   | 0.025092696  | 8.056434467 | 0.362489605  | 0.724999388 | 0.724999388 | -5.568816424 |
| 1456193_x_at | -0.026174461 | 10.3372992  | -0.362466366 | 0.725016188 | 0.725016188 | -5.568824445 |
| 1435758_at   | 0.035574494  | 8.37922869  | 0.362391572  | 0.725070256 | 0.725070256 | -5.568850258 |
| 1433631_at   | -0.03055921  | 11.1473253  | -0.362384353 | 0.725075475 | 0.725075475 | -5.568852749 |
| 1453162_at   | 0.029664959  | 8.680111983 | 0.362363549  | 0.725090514 | 0.725090514 | -5.568859927 |
| 1418999_at   | -0.023204067 | 8.202464713 | -0.362350217 | 0.725100152 | 0.725100152 | -5.568864528 |
| 1417627_a_at | 0.023732617  | 7.238826291 | 0.362318233  | 0.725123275 | 0.725123275 | -5.568875563 |
| 1452889_at   | -0.032130908 | 7.200216621 | -0.362308866 | 0.725130046 | 0.725130046 | -5.568878795 |
| 1459440_at   | -0.036894553 | 4.011661744 | -0.362293723 | 0.725140993 | 0.725140993 | -5.568884019 |
| 1439142_at   | 0.036795993  | 5.202968219 | 0.362271546  | 0.725157027 | 0.725157027 | -5.56889167  |
| 1426586_at   | -0.024131984 | 9.512570811 | -0.362249233 | 0.725173157 | 0.725173157 | -5.568899366 |
| 1434270_at   | 0.0369016    | 6.225115751 | 0.362221293  | 0.725193357 | 0.725193357 | -5.568909004 |
| 1417765_a_at | 0.030913426  | 3.766389644 | 0.362215976  | 0.725197201 | 0.725197201 | -5.568910838 |

|              |              |             |              |             |             |              |
|--------------|--------------|-------------|--------------|-------------|-------------|--------------|
| 1441698_at   | -0.036327522 | 5.004163739 | -0.362203139 | 0.725206481 | 0.725206481 | -5.568915265 |
| 1437237_x_at | -0.0376317   | 8.069203229 | -0.362202479 | 0.725206959 | 0.725206959 | -5.568915493 |
| 1458998_at   | -0.031306912 | 4.749450561 | -0.362189773 | 0.725216145 | 0.725216145 | -5.568919875 |
| 1447696_x_at | -0.024026892 | 7.203711101 | -0.362162565 | 0.725235815 | 0.725235815 | -5.568929259 |
| 1439707_at   | 0.031548416  | 4.756218094 | 0.36214121   | 0.725251255 | 0.725251255 | -5.568936623 |
| 1432770_at   | -0.043615159 | 3.822598367 | -0.362092867 | 0.725286206 | 0.725286206 | -5.568953293 |
| 1436632_at   | 0.033832895  | 8.464320595 | 0.362023433  | 0.725336407 | 0.725336407 | -5.568977232 |
| 1438781_at   | -0.032311703 | 8.836264926 | -0.362002976 | 0.725351198 | 0.725351198 | -5.568984284 |
| 1454634_at   | -0.024484393 | 5.954994925 | -0.361971306 | 0.725374096 | 0.725374096 | -5.568995201 |
| 1451890_at   | -0.024949975 | 6.684978114 | -0.361936235 | 0.725399454 | 0.725399454 | -5.569007289 |
| 1452430_s_at | -0.027193982 | 11.1222731  | -0.361920362 | 0.725410931 | 0.725410931 | -5.56901276  |
| 1447570_s_at | -0.05005926  | 6.92838422  | -0.361912624 | 0.725416526 | 0.725416526 | -5.569015426 |
| 1416788_a_at | 0.023126774  | 10.16777457 | 0.361904019  | 0.725422747 | 0.725422747 | -5.569018392 |
| 1440301_at   | 0.029420402  | 6.476550415 | 0.3618624    | 0.72545284  | 0.72545284  | -5.569032734 |
| 1428945_at   | 0.024084551  | 9.381498185 | 0.361859232  | 0.725455131 | 0.725455131 | -5.569033826 |
| 1423490_at   | 0.023222607  | 9.321900621 | 0.361822469  | 0.725481713 | 0.725481713 | -5.569046493 |
| 1420956_at   | 0.028028701  | 8.797640642 | 0.361820322  | 0.725483265 | 0.725483265 | -5.569047233 |
| 1433635_at   | -0.025264695 | 8.302390027 | -0.361808444 | 0.725491854 | 0.725491854 | -5.569051326 |
| 1454117_at   | 0.039497831  | 3.598006073 | 0.361801186  | 0.725497102 | 0.725497102 | -5.569053826 |
| 1438088_at   | -0.035944336 | 3.993009088 | -0.361763418 | 0.725524412 | 0.725524412 | -5.569066838 |
| 1435197_at   | 0.055027582  | 8.360838836 | 0.361757111  | 0.725528972 | 0.725528972 | -5.569069011 |
| 1431718_at   | -0.029617711 | 5.366430326 | -0.361751486 | 0.72553304  | 0.72553304  | -5.569070948 |
| 1422585_at   | 0.033591845  | 4.172859225 | 0.361732893  | 0.725546484 | 0.725546484 | -5.569077353 |
| 1419432_at   | 0.038240878  | 3.409016583 | 0.361732648  | 0.725546661 | 0.725546661 | -5.569077438 |
| 1433669_at   | 0.025018726  | 9.899156174 | 0.361714521  | 0.725559769 | 0.725559769 | -5.569083682 |
| 1426012_a_at | -0.029810409 | 8.804161998 | -0.361696526 | 0.725572781 | 0.725572781 | -5.56908988  |
| 1447616_at   | -0.023978665 | 3.18161874  | -0.36168338  | 0.725582288 | 0.725582288 | -5.569094408 |
| 1448314_at   | 0.025152419  | 10.51975148 | 0.361676138  | 0.725587524 | 0.725587524 | -5.569096903 |
| 1452165_at   | -0.032485028 | 3.141024806 | -0.361671907 | 0.725590584 | 0.725590584 | -5.56909836  |
| 1446807_at   | 0.036176011  | 7.550797107 | 0.361620832  | 0.725627517 | 0.725627517 | -5.569115949 |
| 1423877_at   | 0.026802777  | 8.056734184 | 0.361532437  | 0.72569144  | 0.72569144  | -5.569146386 |
| 1427008_at   | -0.026318304 | 5.699471775 | -0.361531559 | 0.725692074 | 0.725692074 | -5.569146688 |
| 1430015_at   | 0.032124315  | 5.471757671 | 0.361472187  | 0.72573501  | 0.72573501  | -5.569167128 |
| 1443839_at   | 0.023460507  | 3.44818521  | 0.361425495  | 0.725768777 | 0.725768777 | -5.569183199 |
| 1455070_at   | 0.028267455  | 10.11275869 | 0.361351782  | 0.725822086 | 0.725822086 | -5.569208568 |
| 1419270_a_at | 0.035916088  | 9.06514937  | 0.361342031  | 0.725829138 | 0.725829138 | -5.569211924 |
| 1418440_at   | -0.036317513 | 9.429186536 | -0.361303148 | 0.725857259 | 0.725857259 | -5.569225303 |
| 1437721_at   | -0.04256586  | 3.649430441 | -0.361281978 | 0.72587257  | 0.72587257  | -5.569232587 |
| 1425591_a_at | -0.022250673 | 9.524276563 | -0.361229048 | 0.72591085  | 0.72591085  | -5.569250796 |
| 1453011_at   | -0.040711947 | 7.225601315 | -0.361226613 | 0.725912611 | 0.725912611 | -5.569251634 |
| 1435566_s_at | 0.027985144  | 8.459869315 | 0.361218253  | 0.725918658 | 0.725918658 | -5.56925451  |
| 1449060_at   | 0.024209251  | 8.246649423 | 0.361212013  | 0.725923171 | 0.725923171 | -5.569256656 |
| 1447943_x_at | 0.037374658  | 8.581042298 | 0.361146063  | 0.72597087  | 0.72597087  | -5.56927934  |
| 1445876_at   | -0.024781788 | 3.700333041 | -0.361102576 | 0.726002322 | 0.726002322 | -5.569294296 |
| 1448278_at   | -0.028032189 | 7.780815339 | -0.361100519 | 0.72600381  | 0.72600381  | -5.569295003 |
| 1442940_at   | -0.042515362 | 4.416985444 | -0.361100067 | 0.726004137 | 0.726004137 | -5.569295159 |
| 1456459_x_at | -0.026620368 | 3.70546061  | -0.361082219 | 0.726017046 | 0.726017046 | -5.569301296 |
| 1431871_at   | -0.02833235  | 3.607567587 | -0.36107804  | 0.726020069 | 0.726020069 | -5.569302733 |
| 1458421_at   | 0.035846346  | 3.940702624 | 0.360967613  | 0.726099941 | 0.726099941 | -5.5693407   |
| 1423368_at   | -0.025636099 | 12.60994424 | -0.360966253 | 0.726100925 | 0.726100925 | -5.569341167 |
| 1454002_at   | 0.038509289  | 5.864058944 | 0.360957272  | 0.726107421 | 0.726107421 | -5.569344255 |
| 1426192_at   | 0.026812558  | 5.974516392 | 0.360917451  | 0.726136224 | 0.726136224 | -5.569357943 |
| 1442780_at   | 0.032347994  | 4.996903666 | 0.360911378  | 0.726140617 | 0.726140617 | -5.56936003  |

|              |              |             |              |             |             |              |
|--------------|--------------|-------------|--------------|-------------|-------------|--------------|
| 1428361_x_at | 0.033471578  | 14.38861151 | 0.360845378  | 0.726188358 | 0.726188358 | -5.569382713 |
| 1416577_a_at | -0.030793538 | 11.17808894 | -0.360831074 | 0.726198705 | 0.726198705 | -5.569387629 |
| 1440772_x_at | -0.026205899 | 3.670668255 | -0.360809614 | 0.726214228 | 0.726214228 | -5.569395003 |
| 1425582_a_at | -0.032082801 | 8.838002288 | -0.360803647 | 0.726218544 | 0.726218544 | -5.569397053 |
| 1458347_s_at | -0.02889946  | 5.173312623 | -0.360766158 | 0.726245663 | 0.726245663 | -5.569409934 |
| 1449274_at   | -0.026452922 | 7.038368475 | -0.360737312 | 0.726266529 | 0.726266529 | -5.569419845 |
| 1460532_at   | -0.029387784 | 3.954561477 | -0.360730559 | 0.726271414 | 0.726271414 | -5.569422165 |
| 1440299_at   | -0.027367442 | 6.628825142 | -0.360650252 | 0.726329508 | 0.726329508 | -5.569449751 |
| 1447928_at   | -0.024469492 | 3.913638174 | -0.360642477 | 0.726335132 | 0.726335132 | -5.569452421 |
| 1440654_at   | -0.033281341 | 4.032587499 | -0.360621565 | 0.72635026  | 0.72635026  | -5.569459603 |
| 1422314_at   | 0.037293058  | 6.25977434  | 0.360618873  | 0.726352208 | 0.726352208 | -5.569460528 |
| 1458067_at   | 0.027264207  | 3.702164116 | 0.360609158  | 0.726359236 | 0.726359236 | -5.569463865 |
| 1437480_at   | 0.030401829  | 8.810946451 | 0.360590759  | 0.726372546 | 0.726372546 | -5.569470183 |
| 1426900_at   | 0.045098132  | 10.00245059 | 0.360581185  | 0.726379472 | 0.726379472 | -5.569473471 |
| 1419473_a_at | 0.028501183  | 3.842577415 | 0.360576723  | 0.7263827   | 0.7263827   | -5.569475003 |
| 1423391_at   | 0.025775396  | 9.202690787 | 0.360552288  | 0.726400377 | 0.726400377 | -5.569483394 |
| 1418390_at   | -0.035083023 | 9.035293525 | -0.360517489 | 0.726425552 | 0.726425552 | -5.569495343 |
| 1460033_at   | -0.034224134 | 3.67792549  | -0.360501381 | 0.726437206 | 0.726437206 | -5.569500874 |
| 1420285_at   | -0.028783817 | 3.354665024 | -0.360501002 | 0.72643748  | 0.72643748  | -5.569501004 |
| 1450712_at   | -0.039081872 | 3.736271042 | -0.36048717  | 0.726447487 | 0.726447487 | -5.569505753 |
| 1425426_a_at | 0.028598976  | 4.943014857 | 0.360475913  | 0.72645563  | 0.72645563  | -5.569509617 |
| 1441897_at   | -0.041714923 | 4.061375126 | -0.360469313 | 0.726460405 | 0.726460405 | -5.569511883 |
| 1417537_at   | 0.024595753  | 6.325558731 | 0.360410419  | 0.726503013 | 0.726503013 | -5.5695321   |
| 1428996_at   | -0.058068531 | 6.732552843 | -0.36038245  | 0.726523248 | 0.726523248 | -5.5695417   |
| 1449497_at   | 0.039356598  | 3.531148248 | 0.360357344  | 0.726541412 | 0.726541412 | -5.569550317 |
| 1427740_a_at | -0.029922263 | 3.355017475 | -0.360306217 | 0.726578402 | 0.726578402 | -5.569567862 |
| 1452171_at   | 0.02666394   | 8.581062189 | 0.360288215  | 0.726591427 | 0.726591427 | -5.56957404  |
| 1420879_a_at | 0.030037888  | 10.7313406  | 0.360215537  | 0.726644011 | 0.726644011 | -5.569598976 |
| 1421914_s_at | -0.029442878 | 8.698612611 | -0.360202801 | 0.726653226 | 0.726653226 | -5.569603345 |
| 1448839_at   | -0.033947293 | 7.553007811 | -0.360174339 | 0.726673819 | 0.726673819 | -5.569613109 |
| 1420694_a_at | -0.040586939 | 3.744550124 | -0.360142754 | 0.726696673 | 0.726696673 | -5.569623943 |
| 1421035_a_at | -0.037805964 | 6.665409157 | -0.360103549 | 0.726725039 | 0.726725039 | -5.56963739  |
| 1448394_at   | 0.049739201  | 4.898900189 | 0.36009882   | 0.726728462 | 0.726728462 | -5.569639012 |
| 1426943_at   | -0.04221392  | 7.797116793 | -0.360081026 | 0.726741336 | 0.726741336 | -5.569645114 |
| 1427751_a_at | 0.03726118   | 4.882739242 | 0.360024244  | 0.726782423 | 0.726782423 | -5.569664586 |
| 1459104_at   | 0.042939173  | 6.226915468 | 0.359980145  | 0.726814333 | 0.726814333 | -5.569679706 |
| 1450264_a_at | -0.024663101 | 8.026879155 | -0.359971298 | 0.726820734 | 0.726820734 | -5.569682739 |
| 1426979_at   | 0.02436092   | 8.408111156 | 0.359957495  | 0.726830722 | 0.726830722 | -5.569687472 |
| 1440025_at   | -0.029756388 | 6.06538447  | -0.359951699 | 0.726834916 | 0.726834916 | -5.569689459 |
| 1448915_at   | 0.041208241  | 6.27994128  | 0.359951603  | 0.726834985 | 0.726834985 | -5.569689491 |
| 1459626_at   | 0.031717913  | 5.366973906 | 0.359938829  | 0.726844229 | 0.726844229 | -5.569693871 |
| 1435744_at   | 0.024510648  | 8.093480148 | 0.35988038   | 0.726886523 | 0.726886523 | -5.569713906 |
| 1441488_at   | -0.028099281 | 4.430855975 | -0.359876423 | 0.726889387 | 0.726889387 | -5.569715263 |
| 1459605_at   | -0.031822596 | 5.345507645 | -0.359855379 | 0.726904615 | 0.726904615 | -5.569722475 |
| 1416074_a_at | 0.028171861  | 13.54398484 | 0.359841649  | 0.72691455  | 0.72691455  | -5.569727181 |
| 1437288_at   | 0.050598312  | 10.0273313  | 0.359827748  | 0.72692461  | 0.72692461  | -5.569731945 |
| 1428874_at   | -0.025143917 | 9.797304391 | -0.359777389 | 0.726961052 | 0.726961052 | -5.569749203 |
| 1455628_at   | -0.028434016 | 5.515195776 | -0.35963194  | 0.72706631  | 0.72706631  | -5.569799033 |
| 1448450_at   | 0.025576371  | 9.544355354 | 0.35956864   | 0.727112121 | 0.727112121 | -5.569820714 |
| 1421659_at   | 0.024455058  | 4.432450884 | 0.359527639  | 0.727141794 | 0.727141794 | -5.569834755 |
| 1429183_at   | 0.036679978  | 5.963888386 | 0.359515057  | 0.7271509   | 0.7271509   | -5.569839063 |
| 1455763_at   | 0.074815501  | 6.000168041 | 0.359503663  | 0.727159146 | 0.727159146 | -5.569842965 |
| 1454580_at   | -0.030213842 | 3.621057553 | -0.359449651 | 0.727198237 | 0.727198237 | -5.569861458 |

|              |              |             |              |             |             |              |
|--------------|--------------|-------------|--------------|-------------|-------------|--------------|
| 1444597_at   | 0.022926116  | 3.028178256 | 0.359442131  | 0.727203679 | 0.727203679 | -5.569864032 |
| 1415980_at   | 0.026110886  | 11.27551059 | 0.359394599  | 0.727238081 | 0.727238081 | -5.569880304 |
| 1427250_at   | 0.024676355  | 11.37788713 | 0.359387436  | 0.727243265 | 0.727243265 | -5.569882756 |
| 1460741_x_at | 0.052839107  | 7.30859773  | 0.359385783  | 0.727244461 | 0.727244461 | -5.569883322 |
| 1444660_at   | 0.033529921  | 6.846414967 | 0.359378746  | 0.727249555 | 0.727249555 | -5.569885731 |
| 1453389_a_at | 0.04142132   | 6.118354519 | 0.359372703  | 0.727253928 | 0.727253928 | -5.569887799 |
| 1458589_at   | -0.044906964 | 3.593911057 | -0.359350954 | 0.72726967  | 0.72726967  | -5.569895244 |
| 1432361_a_at | -0.03257848  | 7.31101933  | -0.35934392  | 0.727274761 | 0.727274761 | -5.569897651 |
| 1451251_at   | 0.027251297  | 10.46350231 | 0.359341392  | 0.727276591 | 0.727276591 | -5.569898516 |
| 1432274_at   | -0.023426985 | 4.312650703 | -0.359309262 | 0.727299846 | 0.727299846 | -5.569909513 |
| 1416912_at   | -0.026358084 | 10.45265085 | -0.359281305 | 0.727320081 | 0.727320081 | -5.56991908  |
| 1456589_x_at | -0.034538601 | 3.399216178 | -0.359280717 | 0.727320506 | 0.727320506 | -5.569919281 |
| 1441530_at   | -0.038799789 | 5.751307529 | -0.359244745 | 0.727346543 | 0.727346543 | -5.56993159  |
| 1452697_at   | -0.02709766  | 7.752653725 | -0.359191371 | 0.727385176 | 0.727385176 | -5.569949853 |
| 1447744_s_at | 0.031606396  | 5.016630728 | 0.359176008  | 0.727396296 | 0.727396296 | -5.569955108 |
| 1438016_at   | 0.040652563  | 10.22464512 | 0.359139589  | 0.727422658 | 0.727422658 | -5.569967567 |
| 1417195_at   | -0.037394886 | 7.153701067 | -0.358976309 | 0.727540849 | 0.727540849 | -5.570023409 |
| 1419444_at   | 0.032866847  | 10.85154043 | 0.358951393  | 0.727558885 | 0.727558885 | -5.570031928 |
| 1441079_at   | 0.036977033  | 5.422282838 | 0.358835166  | 0.727643023 | 0.727643023 | -5.57007166  |
| 1430740_at   | -0.038301247 | 3.819239226 | -0.35878006  | 0.727682916 | 0.727682916 | -5.570090494 |
| 1458040_at   | -0.034138463 | 6.565646273 | -0.358779356 | 0.727683426 | 0.727683426 | -5.570090735 |
| 1455225_at   | -0.039973492 | 4.01823496  | -0.358746085 | 0.727707512 | 0.727707512 | -5.570102104 |
| 1426994_at   | 0.026615169  | 8.013098187 | 0.358740385  | 0.727711638 | 0.727711638 | -5.570104052 |
| 1445216_at   | -0.03654228  | 3.798595677 | -0.358728543 | 0.727720211 | 0.727720211 | -5.570108098 |
| 1430323_at   | -0.02849464  | 3.349390505 | -0.358717327 | 0.727728332 | 0.727728332 | -5.570111931 |
| 1417601_at   | 0.029191665  | 3.70878256  | 0.358716027  | 0.727729273 | 0.727729273 | -5.570112375 |
| 1420466_at   | 0.024619654  | 3.094584712 | 0.358708558  | 0.72773468  | 0.72773468  | -5.570114927 |
| 1459505_at   | 0.023376311  | 4.006863142 | 0.358701077  | 0.727740096 | 0.727740096 | -5.570117483 |
| 1439123_at   | -0.025368815 | 8.44664105  | -0.358650458 | 0.727776742 | 0.727776742 | -5.570134777 |
| 1454786_at   | -0.034842597 | 7.98938314  | -0.358597483 | 0.727815095 | 0.727815095 | -5.570152873 |
| 1441783_at   | -0.028608556 | 4.224317038 | -0.358545423 | 0.727852787 | 0.727852787 | -5.570170655 |
| 1420163_at   | 0.024406421  | 3.611830001 | 0.358500414  | 0.727885374 | 0.727885374 | -5.570186025 |
| 1460713_at   | -0.033667762 | 7.403371617 | -0.358477925 | 0.727901656 | 0.727901656 | -5.570193705 |
| 1453075_at   | -0.031075335 | 6.322401788 | -0.358455304 | 0.727918034 | 0.727918034 | -5.570201429 |
| 1419505_a_at | 0.034410603  | 6.3567119   | 0.358408052  | 0.727952247 | 0.727952247 | -5.570217562 |
| 1458962_at   | -0.031834558 | 5.680847724 | -0.358323443 | 0.728013508 | 0.728013508 | -5.570246444 |
| 1434357_a_at | -0.037920968 | 7.812813545 | -0.358301481 | 0.728029411 | 0.728029411 | -5.57025394  |
| 1441877_x_at | 0.030853106  | 3.612345346 | 0.358272739  | 0.728050222 | 0.728050222 | -5.570263749 |
| 1430030_at   | -0.031785102 | 7.881867611 | -0.358141074 | 0.72814556  | 0.72814556  | -5.570308675 |
| 1415759_a_at | -0.030858367 | 10.13971466 | -0.358133982 | 0.728150696 | 0.728150696 | -5.570311095 |
| 1440607_at   | -0.031275194 | 5.302390328 | -0.358133616 | 0.728150961 | 0.728150961 | -5.57031122  |
| 1436979_x_at | 0.025152753  | 10.15520036 | 0.358112983  | 0.728165902 | 0.728165902 | -5.570318259 |
| 1435072_at   | 0.039501458  | 7.563042439 | 0.358105867  | 0.728171055 | 0.728171055 | -5.570320686 |
| 1445839_at   | 0.026065857  | 4.307498737 | 0.35807279   | 0.728195007 | 0.728195007 | -5.570331969 |
| 1451307_at   | -0.024931595 | 8.667578095 | -0.358037338 | 0.72822068  | 0.72822068  | -5.570344061 |
| 1430504_at   | -0.026797897 | 3.390339947 | -0.358010568 | 0.728240065 | 0.728240065 | -5.570353191 |
| 1454768_at   | -0.038457065 | 3.539882674 | -0.357999276 | 0.728248243 | 0.728248243 | -5.570357041 |
| 1460456_at   | 0.062392838  | 7.637112433 | 0.357982499  | 0.728260391 | 0.728260391 | -5.570362762 |
| 1417711_at   | 0.031722607  | 6.124554561 | 0.357950523  | 0.728283547 | 0.728283547 | -5.570373666 |
| 1460131_at   | -0.038490378 | 5.122638553 | -0.357915146 | 0.728309167 | 0.728309167 | -5.570385728 |
| 1419008_at   | -0.037962947 | 4.750914373 | -0.357874969 | 0.728338262 | 0.728338262 | -5.570399426 |
| 1450846_at   | 0.024827458  | 10.47748417 | 0.357836768  | 0.728365927 | 0.728365927 | -5.570412448 |
| 1459045_at   | -0.053423919 | 6.038710557 | -0.357828286 | 0.72837207  | 0.72837207  | -5.570415339 |



|              |              |             |              |             |             |              |
|--------------|--------------|-------------|--------------|-------------|-------------|--------------|
| 1444374_at   | -0.024438537 | 4.336459911 | -0.357736148 | 0.728438799 | 0.728438799 | -5.570446742 |
| 1448072_at   | -0.045304166 | 4.530888308 | -0.357702275 | 0.728463331 | 0.728463331 | -5.570458285 |
| 1423118_at   | -0.023037302 | 8.669992207 | -0.357690783 | 0.728471654 | 0.728471654 | -5.570462201 |
| 1417654_at   | -0.078389236 | 7.415434637 | -0.357684194 | 0.728476426 | 0.728476426 | -5.570464446 |
| 1448861_at   | -0.037011068 | 7.16341816  | -0.357672893 | 0.728484611 | 0.728484611 | -5.570468296 |
| 1430874_at   | 0.034310729  | 3.639060287 | 0.357591333  | 0.728543682 | 0.728543682 | -5.570496083 |
| 1437432_a_at | 0.107839561  | 3.723041496 | 0.357581876  | 0.728550531 | 0.728550531 | -5.570499304 |
| 1446955_at   | -0.042502472 | 7.646105141 | -0.357543734 | 0.728578157 | 0.728578157 | -5.570512296 |
| 1451957_at   | -0.044706018 | 5.782017441 | -0.357535342 | 0.728584235 | 0.728584235 | -5.570515154 |
| 1458380_at   | -0.034685076 | 5.142506923 | -0.357507266 | 0.72860457  | 0.72860457  | -5.570524717 |
| 1425543_s_at | 0.024279294  | 8.827071359 | 0.357391652  | 0.728688311 | 0.728688311 | -5.570564085 |
| 1427953_at   | -0.029653289 | 7.131779395 | -0.357348637 | 0.728719469 | 0.728719469 | -5.570578729 |
| 1427084_a_at | 0.027179607  | 9.175009371 | 0.357321727  | 0.728738961 | 0.728738961 | -5.570587889 |
| 1447437_at   | -0.028776783 | 4.192841826 | -0.35731619  | 0.728742972 | 0.728742972 | -5.570589774 |
| 1436551_at   | 0.034391383  | 6.627526939 | 0.35725609   | 0.728786506 | 0.728786506 | -5.57061023  |
| 1450224_at   | 0.031402354  | 4.425897125 | 0.357154603  | 0.728860021 | 0.728860021 | -5.570644765 |
| 1438411_at   | 0.035007848  | 3.891238298 | 0.357146917  | 0.728865589 | 0.728865589 | -5.57064738  |
| 1446804_at   | -0.031131087 | 6.124411726 | -0.357137033 | 0.728872749 | 0.728872749 | -5.570650743 |
| 1416118_at   | 0.033811979  | 9.670820719 | 0.357095342  | 0.728902951 | 0.728902951 | -5.570664927 |
| 1453307_a_at | 0.022881311  | 10.51207468 | 0.357066284  | 0.728924001 | 0.728924001 | -5.570674812 |
| 1457404_at   | 0.039815507  | 6.407300656 | 0.357014868  | 0.728961248 | 0.728961248 | -5.5706923   |
| 1420002_at   | -0.027221709 | 4.178262183 | -0.356997845 | 0.72897358  | 0.72897358  | -5.57069809  |
| 1447455_at   | 0.029800204  | 3.86333425  | 0.356992853  | 0.728977197 | 0.728977197 | -5.570699787 |
| 1423308_at   | -0.029549217 | 6.29606281  | -0.3569831   | 0.728984262 | 0.728984262 | -5.570703104 |
| 1416583_at   | -0.025632571 | 7.757645313 | -0.356974498 | 0.728990494 | 0.728990494 | -5.57070603  |
| 1431365_at   | -0.024813733 | 5.188204046 | -0.356931535 | 0.729021619 | 0.729021619 | -5.57072064  |
| 1433779_at   | -0.026082512 | 9.777555241 | -0.356889937 | 0.729051755 | 0.729051755 | -5.570734784 |
| 1444275_at   | -0.040216359 | 4.662515872 | -0.356839331 | 0.729088418 | 0.729088418 | -5.570751988 |
| 1419091_a_at | 0.025925178  | 12.95317381 | 0.356832194  | 0.729093589 | 0.729093589 | -5.570754415 |
| 1437520_a_at | -0.05476586  | 8.783826063 | -0.356718084 | 0.729176262 | 0.729176262 | -5.5707932   |
| 1437140_at   | 0.035248993  | 4.127728001 | 0.356658118  | 0.729219709 | 0.729219709 | -5.570813577 |
| 1448543_at   | -0.03019304  | 7.605074871 | -0.356649545 | 0.729225921 | 0.729225921 | -5.57081649  |
| 1436760_a_at | 0.023754433  | 13.26636047 | 0.356605073  | 0.729258143 | 0.729258143 | -5.5708316   |
| 1454700_at   | 0.042751938  | 7.137360014 | 0.356580529  | 0.729275927 | 0.729275927 | -5.570839938 |
| 1426545_at   | 0.027941752  | 8.190067986 | 0.356563189  | 0.729288491 | 0.729288491 | -5.570845828 |
| 1430565_at   | -0.038253062 | 4.291215409 | -0.356534622 | 0.72930919  | 0.72930919  | -5.570855532 |
| 1452546_x_at | 0.024376261  | 4.161436971 | 0.356518434  | 0.729320919 | 0.729320919 | -5.570861031 |
| 1429014_at   | 0.022967823  | 6.465783435 | 0.356502973  | 0.729332121 | 0.729332121 | -5.570866282 |
| 1440922_at   | -0.029248702 | 3.381712366 | -0.356467532 | 0.729357802 | 0.729357802 | -5.570878319 |
| 1428761_a_at | -0.075728695 | 7.716090699 | -0.356456048 | 0.729366122 | 0.729366122 | -5.570882218 |
| 1453153_at   | -0.028275336 | 5.934668456 | -0.35641281  | 0.729397453 | 0.729397453 | -5.570896901 |
| 1451202_at   | 0.027125106  | 9.240680859 | 0.356364598  | 0.729432388 | 0.729432388 | -5.570913271 |
| 1432837_at   | -0.030998687 | 5.773796529 | -0.356343334 | 0.729447797 | 0.729447797 | -5.57092049  |
| 1454834_at   | 0.033358241  | 10.80229364 | 0.35630546   | 0.729475241 | 0.729475241 | -5.570933347 |
| 1434771_at   | -0.023335021 | 7.4716594   | -0.356291017 | 0.729485708 | 0.729485708 | -5.57093825  |
| 1457486_at   | -0.02224045  | 6.365924165 | -0.356216001 | 0.729540068 | 0.729540068 | -5.570963711 |
| 1437497_a_at | -0.036443304 | 11.88782392 | -0.35618027  | 0.729565961 | 0.729565961 | -5.570975837 |
| 1419085_at   | 0.026173138  | 4.356564156 | 0.356117183  | 0.729611679 | 0.729611679 | -5.570997243 |
| 1456477_at   | 0.023201905  | 9.142468712 | 0.356114799  | 0.729613407 | 0.729613407 | -5.570998052 |
| 1419427_at   | -0.028833812 | 4.781627878 | -0.35609713  | 0.729626212 | 0.729626212 | -5.571004047 |
| 1430114_at   | -0.03039021  | 3.605513536 | -0.356055598 | 0.72965631  | 0.72965631  | -5.571018136 |
| 1418639_at   | -0.042297216 | 4.648227791 | -0.356023615 | 0.729679488 | 0.729679488 | -5.571028985 |
| 1430818_at   | -0.030497283 | 4.130892001 | -0.355978588 | 0.72971212  | 0.72971212  | -5.571044257 |

|              |              |             |              |             |             |              |
|--------------|--------------|-------------|--------------|-------------|-------------|--------------|
| 1449763_at   | 0.037422061  | 3.365027039 | 0.355939326  | 0.729740575 | 0.729740575 | -5.571057573 |
| 1436022_at   | 0.031972869  | 8.528429022 | 0.355922256  | 0.729752947 | 0.729752947 | -5.571063362 |
| 1424471_at   | 0.047856871  | 5.591621633 | 0.355881605  | 0.729782408 | 0.729782408 | -5.571077146 |
| 1455883_a_at | -0.035728465 | 8.2785578   | -0.355811093 | 0.729833513 | 0.729833513 | -5.571101052 |
| 1453888_at   | -0.041046833 | 3.418421082 | -0.355804995 | 0.729837933 | 0.729837933 | -5.571103119 |
| 1430310_at   | 0.030994453  | 6.940990377 | 0.355720173  | 0.729899411 | 0.729899411 | -5.57113187  |
| 1459906_at   | -0.047277899 | 5.906208805 | -0.35568127  | 0.729927609 | 0.729927609 | -5.571145054 |
| 1457207_at   | 0.108672813  | 5.527907607 | 0.355649763  | 0.729950445 | 0.729950445 | -5.571155731 |
| 1429732_at   | -0.049564609 | 5.119128826 | -0.355624492 | 0.729968762 | 0.729968762 | -5.571164294 |
| 1433216_at   | -0.045346259 | 3.742886463 | -0.355622292 | 0.729970357 | 0.729970357 | -5.571165039 |
| 1422683_at   | -0.055600992 | 5.017841939 | -0.355580144 | 0.730000907 | 0.730000907 | -5.571179319 |
| 1425439_a_at | 0.035297376  | 7.284690965 | 0.355547972  | 0.730024227 | 0.730024227 | -5.571190218 |
| 1457380_at   | 0.030468892  | 3.575685337 | 0.355538623  | 0.730031003 | 0.730031003 | -5.571193385 |
| 1419286_s_at | -0.024087277 | 9.499627649 | -0.355533723 | 0.730034556 | 0.730034556 | -5.571195045 |
| 1422982_at   | 0.040966156  | 5.212161999 | 0.355522116  | 0.730042969 | 0.730042969 | -5.571198977 |
| 1416247_at   | 0.024875814  | 9.701019557 | 0.355408681  | 0.730125195 | 0.730125195 | -5.571237395 |
| 1432134_at   | -0.029534568 | 3.214888794 | -0.355369001 | 0.730153959 | 0.730153959 | -5.571250831 |
| 1437108_at   | 0.026472834  | 7.691602649 | 0.35533773   | 0.730176627 | 0.730176627 | -5.571261419 |
| 1437474_at   | -0.038127972 | 9.052366269 | -0.355300155 | 0.730203866 | 0.730203866 | -5.57127414  |
| 1442624_at   | 0.029726124  | 6.7202685   | 0.355277622  | 0.730220201 | 0.730220201 | -5.571281768 |
| 1424985_a_at | -0.033964712 | 6.113776032 | -0.355271939 | 0.730224321 | 0.730224321 | -5.571283691 |
| 1443073_at   | -0.050975933 | 5.46413859  | -0.355269616 | 0.730226005 | 0.730226005 | -5.571284478 |
| 1438440_at   | 0.029319654  | 5.268959733 | 0.355236557  | 0.73024997  | 0.73024997  | -5.571295668 |
| 1445558_at   | 0.048463528  | 5.705420274 | 0.355212647  | 0.730267304 | 0.730267304 | -5.57130376  |
| 1453734_at   | 0.037494688  | 7.658115491 | 0.355186737  | 0.730286087 | 0.730286087 | -5.571312529 |
| 1460236_at   | 0.034791091  | 4.160844655 | 0.355176761  | 0.730293319 | 0.730293319 | -5.571315905 |
| 1420505_a_at | 0.039529943  | 7.489722849 | 0.355173665  | 0.730295564 | 0.730295564 | -5.571316953 |
| 1424426_at   | 0.029157739  | 8.574729069 | 0.355166609  | 0.730300679 | 0.730300679 | -5.571319341 |
| 1434078_at   | 0.023986602  | 9.879221892 | 0.355159367  | 0.730305929 | 0.730305929 | -5.571321792 |
| 1454146_at   | 0.034611157  | 3.700871484 | 0.35510478   | 0.730345503 | 0.730345503 | -5.571340262 |
| 1459576_at   | -0.025802268 | 5.524836133 | -0.355100527 | 0.730348587 | 0.730348587 | -5.571341702 |
| 1442369_at   | -0.028657222 | 4.433982169 | -0.355092267 | 0.730354575 | 0.730354575 | -5.571344496 |
| 1440802_at   | 0.047128384  | 4.030419954 | 0.355060162  | 0.73037785  | 0.73037785  | -5.571355358 |
| 1434084_at   | 0.038259145  | 9.97499659  | 0.355055122  | 0.730381505 | 0.730381505 | -5.571357063 |
| 1427155_at   | 0.023103825  | 5.670127901 | 0.35504649   | 0.730387762 | 0.730387762 | -5.571359983 |
| 1449856_at   | 0.032788731  | 3.765523958 | 0.355025754  | 0.730402796 | 0.730402796 | -5.571366998 |
| 1444622_at   | -0.061290441 | 8.503136191 | -0.354961526 | 0.730449362 | 0.730449362 | -5.571388723 |
| 1454311_at   | 0.024436703  | 5.976653517 | 0.354909021  | 0.730487429 | 0.730487429 | -5.57140648  |
| 1457671_at   | -0.03813526  | 6.800086122 | -0.354874383 | 0.730512543 | 0.730512543 | -5.571418192 |
| 1428567_at   | -0.031632799 | 4.148085632 | -0.354828537 | 0.730545784 | 0.730545784 | -5.571433694 |
| 1446784_at   | 0.059539298  | 5.809303992 | 0.354783622  | 0.730578349 | 0.730578349 | -5.571448878 |
| 1444028_s_at | -0.044388933 | 8.47607234  | -0.354774949 | 0.730584638 | 0.730584638 | -5.57145181  |
| 1432395_at   | 0.024569089  | 4.363809388 | 0.354712514  | 0.730629908 | 0.730629908 | -5.571472914 |
| 1434445_at   | -0.052744476 | 6.574268345 | -0.354702157 | 0.730637418 | 0.730637418 | -5.571476414 |
| 1452554_at   | -0.033405352 | 4.164000698 | -0.354692682 | 0.730644288 | 0.730644288 | -5.571479617 |
| 1419489_at   | -0.032677692 | 5.865201405 | -0.354649956 | 0.730675269 | 0.730675269 | -5.571494056 |
| 1430028_at   | -0.022044138 | 7.927521394 | -0.354615814 | 0.730700026 | 0.730700026 | -5.571505593 |
| 1435479_at   | 0.025740392  | 8.117711695 | 0.354589216  | 0.730719312 | 0.730719312 | -5.57151458  |
| 1434025_at   | -0.03806548  | 9.311433666 | -0.354471292 | 0.730804823 | 0.730804823 | -5.571554417 |
| 1426098_a_at | 0.031382434  | 7.2162375   | 0.354441079  | 0.730826732 | 0.730826732 | -5.571564621 |
| 1455631_at   | 0.048608696  | 6.499373609 | 0.354304377  | 0.730925866 | 0.730925866 | -5.571610782 |
| 1446657_at   | 0.024154664  | 3.37367086  | 0.354277972  | 0.730945015 | 0.730945015 | -5.571619696 |
| 1454835_at   | 0.042989109  | 7.640453313 | 0.354265715  | 0.730953904 | 0.730953904 | -5.571623834 |

|              |              |             |              |             |             |              |
|--------------|--------------|-------------|--------------|-------------|-------------|--------------|
| 1416562_at   | 0.035699785  | 4.968902394 | 0.354249248  | 0.730965846 | 0.730965846 | -5.571629393 |
| 1454069_at   | -0.029249398 | 5.291003119 | -0.354219741 | 0.730987245 | 0.730987245 | -5.571639352 |
| 1422343_at   | -0.025364597 | 3.483269102 | -0.354172593 | 0.731021438 | 0.731021438 | -5.571655265 |
| 1436681_x_at | -0.03043976  | 9.538964725 | -0.35413854  | 0.731046135 | 0.731046135 | -5.571666757 |
| 1422716_a_at | 0.092033916  | 5.387968053 | 0.354098028  | 0.731075517 | 0.731075517 | -5.571680427 |
| 1445131_at   | 0.033053916  | 4.366667911 | 0.354084752  | 0.731085145 | 0.731085145 | -5.571684907 |
| 1422241_a_at | 0.026113897  | 11.84168303 | 0.35396412   | 0.731172637 | 0.731172637 | -5.571725602 |
| 1435265_at   | 0.03957929   | 6.010945835 | 0.353917922  | 0.731206144 | 0.731206144 | -5.571741183 |
| 1437593_x_at | 0.023697543  | 11.49819053 | 0.35385196   | 0.731253988 | 0.731253988 | -5.571763427 |
| 1432501_at   | -0.025250855 | 3.850502775 | -0.353833007 | 0.731267735 | 0.731267735 | -5.571769818 |
| 1460275_at   | -0.021834598 | 6.365376741 | -0.35377018  | 0.731313306 | 0.731313306 | -5.571791    |
| 1425315_at   | -0.045168786 | 6.8247088   | -0.353764364 | 0.731317525 | 0.731317525 | -5.57179296  |
| 1416547_at   | 0.025033199  | 10.13764904 | 0.35372437   | 0.731346535 | 0.731346535 | -5.571806442 |
| 1431049_at   | -0.04500476  | 3.503408537 | -0.353722132 | 0.731348158 | 0.731348158 | -5.571807196 |
| 1433042_at   | 0.039474716  | 3.946442422 | 0.353657463  | 0.731395068 | 0.731395068 | -5.571828993 |
| 1424939_at   | -0.045520632 | 3.585625548 | -0.353644287 | 0.731404625 | 0.731404625 | -5.571833433 |
| 1422777_at   | -0.023761572 | 5.343908551 | -0.353616845 | 0.731424531 | 0.731424531 | -5.57184268  |
| 1428586_at   | 0.062500453  | 7.158808885 | 0.35361077   | 0.731428938 | 0.731428938 | -5.571844727 |
| 1440333_at   | 0.028651138  | 6.877859565 | 0.353594761  | 0.731440551 | 0.731440551 | -5.571850122 |
| 1431364_a_at | 0.047747635  | 5.932286307 | 0.353555558  | 0.731468989 | 0.731468989 | -5.571863331 |
| 1445002_at   | 0.040843251  | 4.705944333 | 0.353525276  | 0.731490956 | 0.731490956 | -5.571873533 |
| 1447717_x_at | -0.03536052  | 3.710859344 | -0.353511654 | 0.731500838 | 0.731500838 | -5.571878122 |
| 1458454_at   | 0.041295183  | 6.006448521 | 0.35346468   | 0.731534914 | 0.731534914 | -5.571893945 |
| 1453790_at   | -0.027510898 | 4.672494269 | -0.35343701  | 0.731554987 | 0.731554987 | -5.571903265 |
| 1444780_at   | -0.031735408 | 5.100229523 | -0.353412772 | 0.73157257  | 0.73157257  | -5.571911428 |
| 1460261_at   | 0.021701702  | 4.737862041 | 0.353318512  | 0.731640952 | 0.731640952 | -5.571943169 |
| 1416697_at   | -0.032289725 | 4.296631237 | -0.353233808 | 0.731702404 | 0.731702404 | -5.571971686 |
| 1417785_at   | 0.03243223   | 4.220182345 | 0.353228388  | 0.731706337 | 0.731706337 | -5.57197351  |
| 1440914_s_at | -0.027994918 | 3.608276685 | -0.353197877 | 0.731728473 | 0.731728473 | -5.57198378  |
| 1458889_at   | 0.049266953  | 5.946664738 | 0.353170119  | 0.731748612 | 0.731748612 | -5.571993123 |
| 1444152_at   | 0.04150625   | 4.821453088 | 0.353146383  | 0.731765832 | 0.731765832 | -5.572001111 |
| 1437189_x_at | 0.028846266  | 3.407294607 | 0.353106072  | 0.731795079 | 0.731795079 | -5.572014677 |
| 1422060_at   | 0.023281209  | 4.782478179 | 0.353066164  | 0.731824034 | 0.731824034 | -5.572028105 |
| 1417415_at   | 0.021621283  | 4.067187073 | 0.353064517  | 0.73182523  | 0.73182523  | -5.572028659 |
| 1432046_at   | -0.029389947 | 3.962973905 | -0.352963511 | 0.731898515 | 0.731898515 | -5.572062639 |
| 1437617_x_at | 0.025938433  | 7.027892283 | 0.352931031  | 0.731922082 | 0.731922082 | -5.572073564 |
| 1456298_at   | 0.036906439  | 5.857951997 | 0.352909008  | 0.731938062 | 0.731938062 | -5.572080971 |
| 1452754_at   | -0.032051641 | 8.994023256 | -0.352853708 | 0.731978188 | 0.731978188 | -5.572099568 |
| 1457029_at   | 0.047789511  | 6.914825804 | 0.352844221  | 0.731985071 | 0.731985071 | -5.572102758 |
| 1443807_x_at | 0.051047655  | 4.345350983 | 0.352809204  | 0.73201048  | 0.73201048  | -5.572114532 |
| 1433435_at   | 0.032752067  | 6.916623387 | 0.352791312  | 0.732023463 | 0.732023463 | -5.572120548 |
| 1440457_at   | 0.027444323  | 6.6672115   | 0.352730288  | 0.732067744 | 0.732067744 | -5.572141063 |
| 1426815_s_at | -0.024215046 | 9.88566997  | -0.352666659 | 0.732113916 | 0.732113916 | -5.57216245  |
| 1444456_at   | -0.032065873 | 7.469230878 | -0.352662756 | 0.732116749 | 0.732116749 | -5.572163762 |
| 1424819_a_at | -0.032967414 | 7.483674999 | -0.352644358 | 0.7321301   | 0.7321301   | -5.572169945 |
| 1434443_at   | 0.021321377  | 9.205116663 | 0.35261307   | 0.732152804 | 0.732152804 | -5.57218046  |
| 1433449_at   | 0.04082188   | 5.064353131 | 0.352607919  | 0.732156542 | 0.732156542 | -5.572182191 |
| 1459962_at   | 0.024800751  | 3.557356256 | 0.352592194  | 0.732167954 | 0.732167954 | -5.572187475 |
| 1421771_a_at | -0.024075962 | 6.465058654 | -0.352581338 | 0.732175831 | 0.732175831 | -5.572191123 |
| 1442910_at   | 0.037433299  | 4.697380462 | 0.352573817  | 0.732181289 | 0.732181289 | -5.57219365  |
| 1420100_s_at | -0.024664201 | 4.015772649 | -0.352572737 | 0.732182073 | 0.732182073 | -5.572194013 |
| 1439397_at   | -0.056749301 | 3.969080188 | -0.352568595 | 0.732185079 | 0.732185079 | -5.572195405 |
| 1429840_at   | -0.030391843 | 3.47343764  | -0.352549973 | 0.732198593 | 0.732198593 | -5.572201662 |

|              |              |             |              |             |             |              |
|--------------|--------------|-------------|--------------|-------------|-------------|--------------|
| 1419500_at   | -0.024730269 | 4.30051704  | -0.352519238 | 0.732220897 | 0.732220897 | -5.572211987 |
| 1459749_s_at | -0.041092907 | 8.690435783 | -0.352502615 | 0.73223296  | 0.73223296  | -5.572217572 |
| 1452138_a_at | -0.032907515 | 3.968157616 | -0.352493954 | 0.732239246 | 0.732239246 | -5.572220482 |
| 1447683_x_at | -0.02836671  | 7.869326218 | -0.352475363 | 0.732252738 | 0.732252738 | -5.572226727 |
| 1436666_at   | 0.042535065  | 5.890401291 | 0.352460742  | 0.732263348 | 0.732263348 | -5.572231638 |
| 1449001_at   | 0.064024768  | 8.150070288 | 0.352430105  | 0.732285582 | 0.732285582 | -5.572241929 |
| 1440548_at   | -0.032253897 | 5.76100771  | -0.352219212 | 0.732438639 | 0.732438639 | -5.572312742 |
| 1434865_a_at | 0.022821893  | 8.162726349 | 0.35220319   | 0.732450267 | 0.732450267 | -5.57231812  |
| 1445417_at   | -0.037864123 | 5.58114019  | -0.352201892 | 0.732451209 | 0.732451209 | -5.572318556 |
| 1444706_at   | -0.043185113 | 5.667090326 | -0.352196919 | 0.732454819 | 0.732454819 | -5.572320225 |
| 1457963_at   | -0.027594152 | 3.542037336 | -0.352168205 | 0.732475659 | 0.732475659 | -5.572329863 |
| 1447730_at   | 0.033421509  | 3.853121288 | 0.352156547  | 0.732484121 | 0.732484121 | -5.572333776 |
| 1453386_at   | -0.054034962 | 7.968264444 | -0.352136233 | 0.732498865 | 0.732498865 | -5.572340593 |
| 1438311_at   | -0.022175363 | 3.225217924 | -0.352085919 | 0.732535383 | 0.732535383 | -5.572357478 |
| 1441787_at   | 0.025869379  | 5.186437007 | 0.35198304   | 0.732610056 | 0.732610056 | -5.572391994 |
| 1455394_at   | -0.026457389 | 7.332148892 | -0.351976563 | 0.732614758 | 0.732614758 | -5.572394167 |
| 1459427_at   | 0.033986762  | 4.238412524 | 0.351912859  | 0.732660998 | 0.732660998 | -5.572415535 |
| 1421930_at   | 0.025133564  | 5.211186983 | 0.351908152  | 0.732664415 | 0.732664415 | -5.572417114 |
| 1454671_at   | 0.045071866  | 7.180909221 | 0.351872942  | 0.732689973 | 0.732689973 | -5.572428923 |
| 1421680_at   | -0.030339404 | 4.245594941 | -0.351800577 | 0.732742502 | 0.732742502 | -5.572453189 |
| 1449748_at   | 0.025001249  | 3.258692512 | 0.351784557  | 0.732754131 | 0.732754131 | -5.57245856  |
| 1429540_at   | -0.032231563 | 4.066894184 | -0.351776323 | 0.732760108 | 0.732760108 | -5.572461321 |
| 1449472_at   | 0.02780732   | 4.466471484 | 0.351749545  | 0.732779547 | 0.732779547 | -5.572470298 |
| 1448350_at   | -0.024374272 | 7.102920169 | -0.35164469  | 0.732855664 | 0.732855664 | -5.572505445 |
| 1458935_at   | -0.026582829 | 3.54078599  | -0.351639199 | 0.73285965  | 0.73285965  | -5.572507286 |
| 1443598_at   | 0.025839844  | 3.466339052 | 0.35160824   | 0.732882125 | 0.732882125 | -5.572517661 |
| 1444140_at   | 0.026598027  | 6.876001495 | 0.351574752  | 0.732906435 | 0.732906435 | -5.572528883 |
| 1460429_at   | -0.023419577 | 10.14193079 | -0.351535654 | 0.73293482  | 0.73293482  | -5.572541983 |
| 1458730_at   | -0.027240572 | 3.387520861 | -0.351519398 | 0.732946621 | 0.732946621 | -5.572547429 |
| 1438213_at   | 0.035156902  | 3.556630878 | 0.351461851  | 0.7329884   | 0.7329884   | -5.572566708 |
| 1415804_at   | -0.03166252  | 5.834707234 | -0.351412709 | 0.733024077 | 0.733024077 | -5.572583169 |
| 1459726_at   | 0.025674834  | 4.304818163 | 0.351389658  | 0.733040812 | 0.733040812 | -5.572590889 |
| 1419137_at   | -0.051883628 | 8.041143325 | -0.351353442 | 0.733067106 | 0.733067106 | -5.572603018 |
| 1433745_at   | 0.029223243  | 10.53255999 | 0.351344472  | 0.733073618 | 0.733073618 | -5.572606021 |
| 1451473_a_at | 0.035936538  | 9.135899644 | 0.35131772   | 0.733093041 | 0.733093041 | -5.572614979 |
| 1424193_at   | 0.029459043  | 7.631097286 | 0.351317601  | 0.733093127 | 0.733093127 | -5.572615019 |
| 1415818_at   | 0.035145231  | 10.54856055 | 0.351282936  | 0.733118295 | 0.733118295 | -5.572626626 |
| 1421665_a_at | 0.027246204  | 3.198787909 | 0.35125618   | 0.733137722 | 0.733137722 | -5.572635584 |
| 1435711_at   | -0.042806826 | 6.604460627 | -0.351192958 | 0.733183625 | 0.733183625 | -5.572656748 |
| 1424730_a_at | 0.068620118  | 6.62629014  | 0.351174314  | 0.733197162 | 0.733197162 | -5.572662989 |
| 1437655_at   | 0.030418992  | 5.04975647  | 0.351171682  | 0.733199073 | 0.733199073 | -5.57266387  |
| 1420440_at   | -0.029983263 | 4.090845607 | -0.351168772 | 0.733201186 | 0.733201186 | -5.572664844 |
| 1425276_at   | -0.040927637 | 6.049240191 | -0.3511526   | 0.733212928 | 0.733212928 | -5.572670257 |
| 1444857_at   | 0.027563608  | 3.205483789 | 0.351151803  | 0.733213507 | 0.733213507 | -5.572670524 |
| 1454381_at   | -0.03265574  | 3.386609814 | -0.351114834 | 0.733240349 | 0.733240349 | -5.572682896 |
| 1419273_at   | 0.023059597  | 9.815890999 | 0.351060526  | 0.733279782 | 0.733279782 | -5.572701069 |
| 1456908_at   | -0.036599521 | 5.501861286 | -0.351044191 | 0.733291643 | 0.733291643 | -5.572706535 |
| 1439269_x_at | 0.031589741  | 9.13503534  | 0.351043391  | 0.733292224 | 0.733292224 | -5.572706803 |
| 1443875_at   | -0.027017322 | 4.876553322 | -0.351034466 | 0.733298704 | 0.733298704 | -5.572709789 |
| 1451067_at   | -0.030765961 | 9.597376189 | -0.351013796 | 0.733313713 | 0.733313713 | -5.572716705 |
| 1424878_at   | -0.026189455 | 7.814039068 | -0.351003854 | 0.733320933 | 0.733320933 | -5.572720031 |
| 1422165_at   | 0.02636401   | 4.95877976  | 0.351003853  | 0.733320933 | 0.733320933 | -5.572720031 |
| 1457310_x_at | 0.037181292  | 5.414987329 | 0.350975192  | 0.733341745 | 0.733341745 | -5.57272962  |

|              |              |             |              |             |             |              |
|--------------|--------------|-------------|--------------|-------------|-------------|--------------|
| 1460731_at   | 0.025613456  | 7.229838445 | 0.350954179  | 0.733357003 | 0.733357003 | -5.572736649 |
| 1449462_at   | 0.028085516  | 4.246360272 | 0.3509354    | 0.733370639 | 0.733370639 | -5.57274293  |
| 1441214_at   | 0.051638786  | 6.243292527 | 0.350910491  | 0.733388727 | 0.733388727 | -5.572751262 |
| 1417493_at   | 0.026534779  | 9.630020512 | 0.350841006  | 0.733439184 | 0.733439184 | -5.5727745   |
| 1439722_at   | -0.053178394 | 6.779655026 | -0.35083479  | 0.733443698 | 0.733443698 | -5.572776579 |
| 1424809_at   | -0.022781261 | 7.447981286 | -0.3508181   | 0.733455818 | 0.733455818 | -5.57278216  |
| 1416832_at   | 0.042227693  | 7.137267392 | 0.350797254  | 0.733470956 | 0.733470956 | -5.572789131 |
| 1430720_at   | 0.031676962  | 5.119807755 | 0.350787807  | 0.733477815 | 0.733477815 | -5.572792289 |
| 1446667_at   | -0.034910441 | 3.878792904 | -0.350735143 | 0.73351606  | 0.73351606  | -5.572809896 |
| 1459324_at   | 0.041549644  | 6.525050801 | 0.350725161  | 0.733523309 | 0.733523309 | -5.572813233 |
| 1456882_at   | 0.024164438  | 3.701105322 | 0.350703088  | 0.733539339 | 0.733539339 | -5.572820612 |
| 1438340_at   | -0.028067542 | 5.310658029 | -0.350673279 | 0.733560986 | 0.733560986 | -5.572830576 |
| 1436012_s_at | -0.032514156 | 6.915218884 | -0.350668021 | 0.733564804 | 0.733564804 | -5.572832334 |
| 1424611_x_at | 0.063058975  | 7.625235431 | 0.350602212  | 0.733612596 | 0.733612596 | -5.572854328 |
| 1431410_at   | -0.031390027 | 3.197790531 | -0.350575997 | 0.733631635 | 0.733631635 | -5.572863088 |
| 1443531_at   | -0.030661719 | 3.776569724 | -0.350574627 | 0.73363263  | 0.73363263  | -5.572863546 |
| 1427290_at   | 0.025060608  | 7.084378712 | 0.350555519  | 0.733646507 | 0.733646507 | -5.572869931 |
| 1423158_at   | -0.024214311 | 8.286019922 | -0.350517511 | 0.73367411  | 0.73367411  | -5.57288263  |
| 1420423_at   | -0.028797143 | 6.075985155 | -0.350472438 | 0.733706845 | 0.733706845 | -5.572897689 |
| 1446511_at   | -0.025314288 | 6.401170265 | -0.350456475 | 0.733718439 | 0.733718439 | -5.572903021 |
| 1457923_at   | -0.035394159 | 4.895103506 | -0.350419079 | 0.733745599 | 0.733745599 | -5.572915513 |
| 1437716_x_at | 0.023277009  | 10.38271423 | 0.350348822  | 0.733796626 | 0.733796626 | -5.572938977 |
| 1419330_a_at | 0.039162953  | 4.879159601 | 0.350327577  | 0.733812056 | 0.733812056 | -5.572946072 |
| 1420365_a_at | -0.024381479 | 12.1640306  | -0.350296666 | 0.733834507 | 0.733834507 | -5.572956393 |
| 1423990_at   | 0.023568346  | 9.757400014 | 0.350245527  | 0.733871651 | 0.733871651 | -5.572973468 |
| 1459496_at   | -0.03568911  | 4.363922259 | -0.350220656 | 0.733889716 | 0.733889716 | -5.572981771 |
| 1432104_a_at | 0.03159997   | 6.067027146 | 0.350160083  | 0.733933713 | 0.733933713 | -5.57300199  |
| 1447713_at   | 0.03538363   | 3.69654736  | 0.350145423  | 0.733944361 | 0.733944361 | -5.573006883 |
| 1452472_at   | -0.02707859  | 4.06021761  | -0.350121049 | 0.733962066 | 0.733962066 | -5.573015018 |
| 1424447_at   | -0.022095391 | 7.902270657 | -0.350106884 | 0.733972355 | 0.733972355 | -5.573019745 |
| 1451643_a_at | 0.024703742  | 8.458285925 | 0.35009015   | 0.733984511 | 0.733984511 | -5.57302533  |
| 1448388_a_at | 0.025598261  | 10.72555984 | 0.350014041  | 0.734039795 | 0.734039795 | -5.573050726 |
| 1426741_a_at | -0.040285905 | 7.958035201 | -0.350012644 | 0.73404081  | 0.73404081  | -5.573051192 |
| 1455994_x_at | -0.03668235  | 9.098869868 | -0.350006268 | 0.734045441 | 0.734045441 | -5.573053319 |
| 1454441_at   | -0.040470192 | 4.698493593 | -0.349984543 | 0.734061222 | 0.734061222 | -5.573060567 |
| 1455264_at   | 0.028542607  | 6.280836888 | 0.349961496  | 0.734077964 | 0.734077964 | -5.573068256 |
| 1458365_at   | 0.030507709  | 7.447259531 | 0.34994701   | 0.734088487 | 0.734088487 | -5.573073088 |
| 1440793_at   | -0.040198655 | 3.245540043 | -0.349946734 | 0.734088687 | 0.734088687 | -5.57307318  |
| 1425180_at   | 0.030341356  | 5.194374348 | 0.349926849  | 0.734103132 | 0.734103132 | -5.573079813 |
| 1446508_at   | -0.023601786 | 7.642396891 | -0.349898787 | 0.734123517 | 0.734123517 | -5.573089173 |
| 1452011_a_at | -0.039096557 | 8.831893868 | -0.349835388 | 0.734169572 | 0.734169572 | -5.573110316 |
| 1433770_at   | -0.022050044 | 12.11425648 | -0.349719262 | 0.734253934 | 0.734253934 | -5.573149035 |
| 1437732_at   | -0.025788628 | 3.187414805 | -0.349710566 | 0.734260251 | 0.734260251 | -5.573151934 |
| 1423543_at   | -0.030535526 | 8.450574544 | -0.349696057 | 0.734270792 | 0.734270792 | -5.573156771 |
| 1418209_a_at | 0.033622409  | 11.57805164 | 0.349672203  | 0.734288122 | 0.734288122 | -5.573164722 |
| 1422095_a_at | -0.036407771 | 5.549279208 | -0.349642377 | 0.734309791 | 0.734309791 | -5.573174664 |
| 1457795_at   | -0.026086714 | 5.010022044 | -0.349625237 | 0.734322243 | 0.734322243 | -5.573180376 |
| 1428872_at   | -0.039888402 | 9.670238313 | -0.349598369 | 0.734341762 | 0.734341762 | -5.57318933  |
| 1439087_a_at | -0.022812165 | 6.673034459 | -0.349579672 | 0.734355346 | 0.734355346 | -5.573195561 |
| 1439928_at   | -0.093555861 | 6.607468436 | -0.34956326  | 0.73436727  | 0.73436727  | -5.57320103  |
| 1423985_at   | 0.033850953  | 12.25768723 | 0.349503628  | 0.734410594 | 0.734410594 | -5.573220899 |
| 1458164_at   | -0.026211719 | 5.156326482 | -0.349483738 | 0.734425045 | 0.734425045 | -5.573227526 |
| 1438847_at   | 0.026289757  | 6.449492486 | 0.349464093  | 0.734439318 | 0.734439318 | -5.57323407  |

|              |              |             |              |             |             |              |
|--------------|--------------|-------------|--------------|-------------|-------------|--------------|
| 1449599_at   | -0.022226709 | 3.292781431 | -0.349439917 | 0.734456883 | 0.734456883 | -5.573242124 |
| 1420061_s_at | 0.028686045  | 4.334730514 | 0.349435156  | 0.734460343 | 0.734460343 | -5.57324371  |
| 1450666_s_at | 0.023265482  | 7.739182034 | 0.349429958  | 0.734464119 | 0.734464119 | -5.573245441 |
| 1444644_x_at | -0.030879264 | 7.090503938 | -0.349351707 | 0.734520974 | 0.734520974 | -5.573271504 |
| 1456886_at   | 0.022655426  | 7.72011203  | 0.349306011  | 0.734554177 | 0.734554177 | -5.573286721 |
| 1420775_at   | 0.023530369  | 4.299244958 | 0.349291859  | 0.734564459 | 0.734564459 | -5.573291433 |
| 1439327_at   | -0.025957954 | 4.024262769 | -0.349257408 | 0.734589492 | 0.734589492 | -5.573302904 |
| 1427033_at   | -0.027363988 | 8.216469491 | -0.349242224 | 0.734600525 | 0.734600525 | -5.573307959 |
| 1452517_at   | -0.035898607 | 5.512675254 | -0.349216002 | 0.734619578 | 0.734619578 | -5.573316689 |
| 1443798_at   | -0.031431336 | 8.470584351 | -0.349199014 | 0.734631922 | 0.734631922 | -5.573322344 |
| 1423334_at   | -0.038797659 | 8.168528925 | -0.349176481 | 0.734648294 | 0.734648294 | -5.573329844 |
| 1441731_at   | 0.04796554   | 3.975667216 | 0.349131102  | 0.734681269 | 0.734681269 | -5.573344949 |
| 1429656_at   | 0.041035373  | 6.91602397  | 0.349092318  | 0.734709451 | 0.734709451 | -5.573357856 |
| 1420000_s_at | 0.030837093  | 10.06085054 | 0.349080854  | 0.734717782 | 0.734717782 | -5.573361671 |
| 1449318_at   | 0.031665246  | 4.753259934 | 0.349075874  | 0.7347214   | 0.7347214   | -5.573363328 |
| 1415690_at   | -0.023232463 | 10.18386598 | -0.348974743 | 0.734794889 | 0.734794889 | -5.573396977 |
| 1428396_at   | -0.037762475 | 5.222244705 | -0.348922372 | 0.734832947 | 0.734832947 | -5.573414398 |
| 1445050_at   | -0.035799002 | 4.791952876 | -0.348913492 | 0.7348394   | 0.7348394   | -5.573417352 |
| 1428099_a_at | 0.034465711  | 11.6743602  | 0.348912265  | 0.734840291 | 0.734840291 | -5.57341776  |
| 1417914_at   | 0.028592988  | 8.250617762 | 0.348898904  | 0.734850001 | 0.734850001 | -5.573422205 |
| 1429708_at   | 0.026364334  | 10.19967133 | 0.348772916  | 0.73494156  | 0.73494156  | -5.573464102 |
| 1448273_at   | -0.027867673 | 7.430864523 | -0.348729208 | 0.734973325 | 0.734973325 | -5.573478633 |
| 1459688_at   | 0.042508163  | 3.730135035 | 0.348718974  | 0.734980762 | 0.734980762 | -5.573482035 |
| 1421935_at   | -0.037097228 | 5.259330791 | -0.348699479 | 0.73499493  | 0.73499493  | -5.573488516 |
| 1439932_at   | -0.029858418 | 5.354830625 | -0.348670239 | 0.735016181 | 0.735016181 | -5.573498236 |
| 1433073_at   | -0.04399658  | 4.234413243 | -0.34864502  | 0.73503451  | 0.73503451  | -5.573506619 |
| 1437218_at   | -0.035253276 | 8.805228171 | -0.348642556 | 0.7350363   | 0.7350363   | -5.573507437 |
| 1455552_at   | 0.034037185  | 7.265316801 | 0.348623181  | 0.735050382 | 0.735050382 | -5.573513877 |
| 1458714_at   | -0.027940937 | 3.836401798 | -0.348562122 | 0.735094759 | 0.735094759 | -5.573534168 |
| 1457441_at   | 0.035102781  | 3.983507469 | 0.348493752  | 0.735144451 | 0.735144451 | -5.573556885 |
| 1418243_at   | -0.034518477 | 4.954546589 | -0.348492761 | 0.735145171 | 0.735145171 | -5.573557214 |
| 1419972_at   | 0.040155754  | 3.663185247 | 0.348373356  | 0.735231959 | 0.735231959 | -5.573596878 |
| 1428615_at   | 0.034969933  | 8.728290404 | 0.34832882   | 0.735264331 | 0.735264331 | -5.573611668 |
| 1418148_at   | 0.037804364  | 6.150515925 | 0.348317815  | 0.73527233  | 0.73527233  | -5.573615323 |
| 1425424_at   | -0.035700527 | 6.886208568 | -0.348126871 | 0.735411126 | 0.735411126 | -5.573678713 |
| 1440414_at   | -0.029804954 | 4.825726207 | -0.348124872 | 0.735412579 | 0.735412579 | -5.573679376 |
| 1458248_at   | -0.034855223 | 5.163000457 | -0.348093655 | 0.735435272 | 0.735435272 | -5.573689736 |
| 1427817_at   | 0.029787791  | 3.554388775 | 0.348086822  | 0.735440239 | 0.735440239 | -5.573692004 |
| 1458594_at   | 0.049841739  | 5.089477096 | 0.348076893  | 0.735447456 | 0.735447456 | -5.573695299 |
| 1452539_a_at | 0.031482511  | 3.437611802 | 0.348064934  | 0.73545615  | 0.73545615  | -5.573699267 |
| 1448869_a_at | -0.021663421 | 10.3531072  | -0.348031299 | 0.735480601 | 0.735480601 | -5.573710428 |
| 1441451_at   | -0.027847357 | 3.073097993 | -0.348028147 | 0.735482892 | 0.735482892 | -5.573711474 |
| 1438608_at   | -0.024226715 | 3.640357787 | -0.348027111 | 0.735483645 | 0.735483645 | -5.573711818 |
| 1457135_at   | -0.022604005 | 6.44536944  | -0.348016969 | 0.735491017 | 0.735491017 | -5.573715183 |
| 1459471_at   | -0.037468107 | 3.830183169 | -0.348002093 | 0.735501832 | 0.735501832 | -5.573720118 |
| 1457451_at   | -0.031325859 | 3.335974573 | -0.347962154 | 0.735530866 | 0.735530866 | -5.573733369 |
| 1452284_at   | -0.044157386 | 8.713815027 | -0.347939562 | 0.73554729  | 0.73554729  | -5.573740863 |
| 1446166_at   | -0.05380516  | 4.096017412 | -0.347930064 | 0.735554195 | 0.735554195 | -5.573744014 |
| 1430639_at   | 0.029751352  | 4.166694138 | 0.347926968  | 0.735556445 | 0.735556445 | -5.573745041 |
| 1456372_at   | -0.033995002 | 4.748643441 | -0.347914298 | 0.735565656 | 0.735565656 | -5.573749243 |
| 1446519_at   | -0.024426748 | 6.140427303 | -0.347836955 | 0.735621884 | 0.735621884 | -5.573774895 |
| 1415901_at   | 0.036825356  | 9.30218202  | 0.347825898  | 0.735629922 | 0.735629922 | -5.573778561 |
| 1433227_at   | 0.024562454  | 3.791442355 | 0.347819426  | 0.735634627 | 0.735634627 | -5.573780708 |

|              |              |             |              |             |             |              |
|--------------|--------------|-------------|--------------|-------------|-------------|--------------|
| 1439528_at   | 0.032122624  | 6.825025498 | 0.347756752  | 0.735680192 | 0.735680192 | -5.573801489 |
| 1454570_at   | -0.029900281 | 3.615435427 | -0.347736191 | 0.735695141 | 0.735695141 | -5.573808306 |
| 1451864_at   | 0.052934413  | 4.943843092 | 0.347728412  | 0.735700796 | 0.735700796 | -5.573810885 |
| 1445883_at   | -0.032536886 | 5.832608615 | -0.347666523 | 0.735745792 | 0.735745792 | -5.573831401 |
| 1443827_x_at | 0.046476281  | 4.446725193 | 0.347625285  | 0.735775774 | 0.735775774 | -5.573845069 |
| 1441737_s_at | -0.022756319 | 10.01432917 | -0.347594926 | 0.735797847 | 0.735797847 | -5.57385513  |
| 1432450_at   | -0.029323052 | 4.048419222 | -0.347566611 | 0.735818434 | 0.735818434 | -5.573864514 |
| 1440393_at   | 0.059492856  | 5.148733863 | 0.347526743  | 0.735847421 | 0.735847421 | -5.573877724 |
| 1416791_a_at | 0.023461528  | 10.18100284 | 0.347520331  | 0.735852083 | 0.735852083 | -5.573879849 |
| 1450862_at   | 0.022924147  | 7.956947773 | 0.347519128  | 0.735852958 | 0.735852958 | -5.573880247 |
| 1416221_at   | 0.022494798  | 12.76600792 | 0.347513984  | 0.735856698 | 0.735856698 | -5.573881952 |
| 1444796_at   | -0.034674448 | 4.89661915  | -0.34749294  | 0.735871999 | 0.735871999 | -5.573888924 |
| 1423819_s_at | -0.021182802 | 10.30013659 | -0.347484873 | 0.735877865 | 0.735877865 | -5.573891597 |
| 1453766_a_at | 0.026187606  | 4.398686511 | 0.347479846  | 0.73588152  | 0.73588152  | -5.573893262 |
| 1423047_at   | -0.027822346 | 8.484095046 | -0.347466739 | 0.73589105  | 0.73589105  | -5.573897604 |
| 1458191_at   | 0.037637802  | 7.014259162 | 0.347457437  | 0.735897813 | 0.735897813 | -5.573900686 |
| 1446648_at   | 0.053449499  | 5.975515235 | 0.347398052  | 0.735940993 | 0.735940993 | -5.573920357 |
| 1442971_at   | 0.039835359  | 5.715182077 | 0.347371459  | 0.73596033  | 0.73596033  | -5.573929164 |
| 1451323_at   | 0.035815478  | 6.200543779 | 0.347353935  | 0.735973072 | 0.735973072 | -5.573934968 |
| 1415770_at   | -0.042680191 | 11.06998858 | -0.347318158 | 0.735999087 | 0.735999087 | -5.573946816 |
| 1424549_at   | 0.042158434  | 4.536236333 | 0.347301263  | 0.736011372 | 0.736011372 | -5.573952411 |
| 1416692_at   | 0.021845416  | 8.107231381 | 0.347236936  | 0.736058148 | 0.736058148 | -5.573973709 |
| 1456250_x_at | 0.050497551  | 9.761416311 | 0.347176788  | 0.736101886 | 0.736101886 | -5.573993621 |
| 1422119_at   | 0.023566944  | 6.936984233 | 0.347083782  | 0.73616952  | 0.73616952  | -5.574024403 |
| 1418224_at   | 0.036633389  | 3.975408911 | 0.347053838  | 0.736191295 | 0.736191295 | -5.574034312 |
| 1425717_at   | 0.029797022  | 5.411197964 | 0.346924049  | 0.736285683 | 0.736285683 | -5.574077251 |
| 1445953_at   | -0.031314876 | 3.502098096 | -0.346915042 | 0.736292233 | 0.736292233 | -5.57408023  |
| 1444462_at   | -0.043342084 | 4.625996325 | -0.346890698 | 0.736309937 | 0.736309937 | -5.574088282 |
| 1426570_a_at | 0.034878168  | 8.040695473 | 0.346876593  | 0.736320195 | 0.736320195 | -5.574092947 |
| 1455477_s_at | -0.027795564 | 5.791827871 | -0.346866538 | 0.736327508 | 0.736327508 | -5.574096273 |
| 1459274_at   | 0.022851076  | 4.722125043 | 0.346812694  | 0.736366667 | 0.736366667 | -5.574114079 |
| 1429201_at   | 0.034388535  | 6.750898443 | 0.346811964  | 0.736367199 | 0.736367199 | -5.574114321 |
| 1430777_a_at | -0.031844507 | 7.308469323 | -0.346790825 | 0.736382573 | 0.736382573 | -5.57412131  |
| 1434105_at   | 0.036796874  | 9.908289714 | 0.346784191  | 0.736387397 | 0.736387397 | -5.574123504 |
| 1446188_at   | 0.036644411  | 5.944237463 | 0.346768428  | 0.736398862 | 0.736398862 | -5.574128716 |
| 1416939_at   | 0.021379698  | 10.31486284 | 0.346722781  | 0.736432061 | 0.736432061 | -5.574143807 |
| 1418103_at   | -0.027200774 | 7.369108425 | -0.346707615 | 0.736443091 | 0.736443091 | -5.574148821 |
| 1418652_at   | 0.029209712  | 4.506158146 | 0.346698671  | 0.736449596 | 0.736449596 | -5.574151777 |
| 1451006_at   | 0.033955838  | 4.262407168 | 0.34669579   | 0.736451691 | 0.736451691 | -5.57415273  |
| 1459364_at   | 0.029870759  | 3.360572477 | 0.346658104  | 0.736479102 | 0.736479102 | -5.574165187 |
| 1454109_a_at | 0.028670445  | 7.70591711  | 0.346636324  | 0.736494943 | 0.736494943 | -5.574172386 |
| 1420406_at   | 0.030241505  | 4.910297592 | 0.346591457  | 0.736527576 | 0.736527576 | -5.574187214 |
| 1427891_at   | -0.028188375 | 6.705106239 | -0.346561446 | 0.736549405 | 0.736549405 | -5.574197131 |
| 1453669_at   | -0.037541996 | 3.142205554 | -0.34651793  | 0.736581056 | 0.736581056 | -5.57421151  |
| 1445968_at   | 0.036589192  | 7.05803702  | 0.346462179  | 0.736621608 | 0.736621608 | -5.574229929 |
| 1422373_at   | -0.03935812  | 4.471250047 | -0.346446317 | 0.736633146 | 0.736633146 | -5.574235169 |
| 1426085_a_at | -0.05419599  | 6.346484463 | -0.346415807 | 0.736655338 | 0.736655338 | -5.574245247 |
| 1416998_at   | -0.030026605 | 9.70087144  | -0.346409599 | 0.736659854 | 0.736659854 | -5.574247298 |
| 1453433_at   | 0.036936731  | 6.260866463 | 0.346400483  | 0.736666485 | 0.736666485 | -5.574250308 |
| 1452749_at   | 0.023390259  | 8.946305826 | 0.346383372  | 0.736678931 | 0.736678931 | -5.57425596  |
| 1457450_at   | -0.023367191 | 3.628185851 | -0.3463494   | 0.736703643 | 0.736703643 | -5.57426718  |
| 1415954_at   | 0.021345035  | 3.294201941 | 0.346338778  | 0.73671137  | 0.73671137  | -5.574270688 |
| 1445550_at   | 0.037160213  | 4.386289792 | 0.346309546  | 0.736732634 | 0.736732634 | -5.574280341 |

|              |              |             |              |             |             |              |
|--------------|--------------|-------------|--------------|-------------|-------------|--------------|
| 1447568_at   | -0.036123866 | 6.229733231 | -0.346303684 | 0.736736898 | 0.736736898 | -5.574282276 |
| 1441740_at   | 0.066739075  | 4.716599113 | 0.346292516  | 0.736745021 | 0.736745021 | -5.574285964 |
| 1415681_at   | -0.027278322 | 9.695070313 | -0.34628428  | 0.736751013 | 0.736751013 | -5.574288683 |
| 1417734_at   | -0.031959025 | 8.2757838   | -0.346232032 | 0.73678902  | 0.73678902  | -5.574305934 |
| 1419824_a_at | 0.029055624  | 8.233287087 | 0.346219435  | 0.736798183 | 0.736798183 | -5.574310092 |
| 1415672_at   | 0.022544437  | 11.05741148 | 0.34621488   | 0.736801497 | 0.736801497 | -5.574311596 |
| 1431135_at   | 0.029161749  | 3.8236261   | 0.346154929  | 0.736845109 | 0.736845109 | -5.574331386 |
| 1443797_at   | 0.040605054  | 3.935699845 | 0.346125729  | 0.736866351 | 0.736866351 | -5.574341023 |
| 1444193_at   | 0.021304758  | 3.538554678 | 0.346085073  | 0.736895927 | 0.736895927 | -5.57435444  |
| 1437741_at   | -0.020568781 | 9.43692576  | -0.346082984 | 0.736897447 | 0.736897447 | -5.57435513  |
| 1447004_at   | -0.041712776 | 3.914992064 | -0.346078088 | 0.736901009 | 0.736901009 | -5.574356745 |
| 1444311_at   | -0.030876226 | 4.507018074 | -0.346053677 | 0.736918768 | 0.736918768 | -5.574364801 |
| 1445313_at   | -0.038428576 | 4.348675978 | -0.346013507 | 0.736947991 | 0.736947991 | -5.574378055 |
| 1424859_at   | -0.030608167 | 7.432883302 | -0.345995074 | 0.736961401 | 0.736961401 | -5.574384136 |
| 1432881_at   | 0.033708698  | 3.855457637 | 0.345993078  | 0.736962853 | 0.736962853 | -5.574384795 |
| 1432787_at   | 0.028495152  | 7.319650198 | 0.345966468  | 0.736982213 | 0.736982213 | -5.574393574 |
| 1430276_at   | 0.033561601  | 4.120649588 | 0.345962035  | 0.736985438 | 0.736985438 | -5.574395036 |
| 1428575_at   | 0.02588944   | 4.631132214 | 0.345930233  | 0.737008574 | 0.737008574 | -5.574405527 |
| 1426788_a_at | 0.027053704  | 11.29788592 | 0.345905057  | 0.737026891 | 0.737026891 | -5.574413831 |
| 1425027_s_at | -0.029226037 | 5.400799494 | -0.345871947 | 0.737050979 | 0.737050979 | -5.574424751 |
| 1459669_at   | 0.042905483  | 5.233492757 | 0.34586455   | 0.737056361 | 0.737056361 | -5.574427191 |
| 1458014_at   | -0.025580084 | 3.795871674 | -0.345787774 | 0.73711222  | 0.73711222  | -5.574452509 |
| 1423069_at   | 0.023605018  | 11.74809571 | 0.345770834  | 0.737124545 | 0.737124545 | -5.574458094 |
| 1445148_at   | -0.027652927 | 8.249575401 | -0.345750291 | 0.737139492 | 0.737139492 | -5.574464867 |
| 1417922_at   | 0.032233815  | 7.817134729 | 0.345740771  | 0.737146418 | 0.737146418 | -5.574468006 |
| 1423083_at   | 0.0296068    | 9.503412473 | 0.345697812  | 0.737177674 | 0.737177674 | -5.574482168 |
| 1426948_at   | 0.033224032  | 9.318542545 | 0.34568025   | 0.737190452 | 0.737190452 | -5.574487957 |
| 1452200_at   | -0.025952038 | 8.673146535 | -0.345655909 | 0.737208163 | 0.737208163 | -5.57449598  |
| 1441115_at   | 0.027322892  | 3.654948465 | 0.345623309  | 0.737231883 | 0.737231883 | -5.574506725 |
| 1455010_at   | 0.024362397  | 9.823437932 | 0.345594398  | 0.737252918 | 0.737252918 | -5.574516252 |
| 1433540_x_at | 0.061815216  | 9.773048784 | 0.345591416  | 0.737255088 | 0.737255088 | -5.574517235 |
| 1431900_a_at | 0.029908707  | 3.900678597 | 0.345506051  | 0.737317203 | 0.737317203 | -5.574545363 |
| 1457234_at   | 0.021408184  | 3.48379234  | 0.345501095  | 0.737320809 | 0.737320809 | -5.574546996 |
| 1416951_a_at | 0.035383189  | 9.727567933 | 0.345498812  | 0.73732247  | 0.73732247  | -5.574547748 |
| 1454025_at   | 0.030379844  | 3.700002268 | 0.345417728  | 0.737381472 | 0.737381472 | -5.574574459 |
| 1435362_at   | -0.024225791 | 10.1782901  | -0.345244693 | 0.737507388 | 0.737507388 | -5.57463144  |
| 1448319_at   | -0.022295893 | 10.20206064 | -0.34522208  | 0.737523844 | 0.737523844 | -5.574638885 |
| 1434111_at   | 0.027676027  | 10.53071115 | 0.345169316  | 0.737562241 | 0.737562241 | -5.574656253 |
| 1452737_at   | -0.024407324 | 10.45945859 | -0.345084451 | 0.737624002 | 0.737624002 | -5.574684184 |
| 1454379_at   | -0.035509547 | 4.274080485 | -0.345028269 | 0.737664889 | 0.737664889 | -5.57470267  |
| 1435596_at   | -0.022875575 | 5.152404894 | -0.345013714 | 0.737675482 | 0.737675482 | -5.574707459 |
| 1435719_at   | 0.036030347  | 7.01912369  | 0.345012457  | 0.737676397 | 0.737676397 | -5.574707873 |
| 1439886_at   | -0.031544857 | 7.60045316  | -0.345004781 | 0.737681983 | 0.737681983 | -5.574710398 |
| 1454938_at   | -0.029831444 | 8.597935417 | -0.344986595 | 0.737695219 | 0.737695219 | -5.574716381 |
| 1433356_at   | 0.024416133  | 3.403566891 | 0.344985351  | 0.737696124 | 0.737696124 | -5.57471679  |
| 1423939_a_at | -0.033055196 | 10.04910826 | -0.344981898 | 0.737698637 | 0.737698637 | -5.574717926 |
| 1436874_x_at | 0.026867696  | 12.06270495 | 0.344887915  | 0.737767038 | 0.737767038 | -5.574748841 |
| 1416789_at   | -0.025636516 | 10.38149673 | -0.344739754 | 0.737874874 | 0.737874874 | -5.57479756  |
| 1423977_at   | 0.026451958  | 3.723011875 | 0.344730995  | 0.73788125  | 0.73788125  | -5.574800439 |
| 1437364_at   | -0.025038544 | 5.433029418 | -0.344703399 | 0.737901335 | 0.737901335 | -5.574809511 |
| 1436933_at   | 0.045777659  | 8.168381022 | 0.344582106  | 0.737989623 | 0.737989623 | -5.574849376 |
| 1423258_at   | 0.029976484  | 6.670841532 | 0.344527521  | 0.738029355 | 0.738029355 | -5.574867311 |
| 1436408_at   | 0.022114365  | 4.321008746 | 0.344526781  | 0.738029894 | 0.738029894 | -5.574867555 |



|              |              |             |              |             |             |              |
|--------------|--------------|-------------|--------------|-------------|-------------|--------------|
| 1421030_at   | 0.023885512  | 8.123649275 | 0.344454394  | 0.738082586 | 0.738082586 | -5.574891335 |
| 1427222_a_at | 0.031455562  | 3.456616726 | 0.344439869  | 0.738093159 | 0.738093159 | -5.574896107 |
| 1442916_at   | 0.037321529  | 6.967375116 | 0.344428026  | 0.73810178  | 0.73810178  | -5.574899997 |
| 1433328_at   | 0.022529832  | 3.427983796 | 0.344380704  | 0.738136228 | 0.738136228 | -5.574915539 |
| 1429420_at   | -0.034969467 | 6.00640621  | -0.344366329 | 0.738146692 | 0.738146692 | -5.57492026  |
| 1416446_at   | -0.042255125 | 8.325089854 | -0.344337531 | 0.738167656 | 0.738167656 | -5.574929717 |
| 1447760_x_at | -0.025288069 | 4.196125236 | -0.344288726 | 0.738203184 | 0.738203184 | -5.574945743 |
| 1455546_s_at | 0.02257172   | 10.79705089 | 0.344246968  | 0.738233583 | 0.738233583 | -5.574959453 |
| 1433541_a_at | -0.035628784 | 9.916751438 | -0.344182573 | 0.738280463 | 0.738280463 | -5.574980592 |
| 1434451_at   | -0.036970495 | 8.121047536 | -0.344111146 | 0.738332463 | 0.738332463 | -5.575004034 |
| 1451797_at   | 0.030176832  | 6.966678719 | 0.344091813  | 0.738346538 | 0.738346538 | -5.575010379 |
| 1455936_a_at | 0.034829586  | 5.682851907 | 0.344073021  | 0.738360219 | 0.738360219 | -5.575016545 |
| 1456224_x_at | 0.024884826  | 3.084202266 | 0.344037078  | 0.738386387 | 0.738386387 | -5.575028339 |
| 1431986_at   | 0.030364577  | 5.424704746 | 0.344024954  | 0.738395214 | 0.738395214 | -5.575032317 |
| 1423144_at   | -0.021844439 | 8.226475769 | -0.344022554 | 0.738396961 | 0.738396961 | -5.575033104 |
| 1441812_at   | 0.026952836  | 3.815787683 | 0.343996477  | 0.738415947 | 0.738415947 | -5.57504166  |
| 1417926_at   | 0.0394241    | 9.370343434 | 0.34398958   | 0.738420968 | 0.738420968 | -5.575043922 |
| 1420602_a_at | -0.025712315 | 4.178655888 | -0.343984109 | 0.738424951 | 0.738424951 | -5.575045717 |
| 1452965_at   | -0.048022241 | 5.646452941 | -0.34387554  | 0.738503998 | 0.738503998 | -5.575081328 |
| 1443054_at   | -0.030518669 | 3.75234915  | -0.343833101 | 0.738534897 | 0.738534897 | -5.575095245 |
| 1418388_s_at | 0.023402942  | 8.981536866 | 0.343824938  | 0.738540841 | 0.738540841 | -5.575097922 |
| 1443319_at   | -0.032066694 | 4.92254641  | -0.343771961 | 0.738579414 | 0.738579414 | -5.575115292 |
| 1433878_at   | 0.022200296  | 9.268140183 | 0.343719131  | 0.738617881 | 0.738617881 | -5.575132612 |
| 1424436_at   | -0.032483468 | 8.198508149 | -0.343645984 | 0.738671143 | 0.738671143 | -5.575156588 |
| 1444976_at   | -0.025825154 | 3.710083802 | -0.343616952 | 0.738692282 | 0.738692282 | -5.575166102 |
| 1432685_at   | -0.026660256 | 3.784491151 | -0.343582867 | 0.738717102 | 0.738717102 | -5.575177272 |
| 1415979_x_at | 0.021158508  | 13.41488367 | 0.343566462  | 0.738729047 | 0.738729047 | -5.575182647 |
| 1422521_at   | 0.034028046  | 8.322946122 | 0.343538303  | 0.738749552 | 0.738749552 | -5.575191874 |
| 1454190_at   | 0.026795788  | 4.239832439 | 0.343498246  | 0.738778722 | 0.738778722 | -5.575204997 |
| 1450678_at   | 0.038663332  | 4.571975372 | 0.343452586  | 0.738811971 | 0.738811971 | -5.575219955 |
| 1448552_s_at | 0.028064581  | 6.511092782 | 0.343440651  | 0.738820662 | 0.738820662 | -5.575223864 |
| 1452066_a_at | 0.029880305  | 9.447149523 | 0.34343866   | 0.738822112 | 0.738822112 | -5.575224516 |
| 1447436_at   | 0.038654562  | 4.322689268 | 0.343419263  | 0.738836237 | 0.738836237 | -5.57523087  |
| 1423462_at   | 0.031165372  | 10.91771715 | 0.343375614  | 0.738868023 | 0.738868023 | -5.575245165 |
| 1444676_at   | -0.037242612 | 6.10678408  | -0.34333246  | 0.738899449 | 0.738899449 | -5.575259297 |
| 1442825_at   | -0.030186039 | 5.583149352 | -0.343287064 | 0.738932509 | 0.738932509 | -5.575274161 |
| 1433956_at   | -0.02671314  | 6.800009309 | -0.343261507 | 0.738951121 | 0.738951121 | -5.575282528 |
| 1428560_at   | 0.02648183   | 8.869188691 | 0.343238069  | 0.73896819  | 0.73896819  | -5.575290201 |
| 1434189_at   | 0.02726389   | 9.066706913 | 0.343181317  | 0.739009521 | 0.739009521 | -5.575308778 |
| 1418940_at   | 0.02723967   | 3.928006302 | 0.343168257  | 0.739019032 | 0.739019032 | -5.575313052 |
| 1438383_x_at | 0.025518125  | 12.49602908 | 0.343165847  | 0.739020787 | 0.739020787 | -5.575313841 |
| 1416528_at   | 0.028589981  | 10.07968018 | 0.343162855  | 0.739022966 | 0.739022966 | -5.575314821 |
| 1456414_at   | 0.022417232  | 4.025970832 | 0.343121911  | 0.739052785 | 0.739052785 | -5.575328221 |
| 1441618_at   | 0.038245192  | 5.309796719 | 0.343096399  | 0.739071365 | 0.739071365 | -5.575336569 |
| 1432524_at   | -0.035233563 | 3.965301546 | -0.343053634 | 0.739102512 | 0.739102512 | -5.575350562 |
| 1444738_at   | -0.030387411 | 6.702514642 | -0.342984664 | 0.739152745 | 0.739152745 | -5.575373127 |
| 1435271_at   | 0.076967028  | 5.805123005 | 0.342909964  | 0.739207152 | 0.739207152 | -5.575397561 |
| 1448838_at   | 0.022454454  | 9.495986225 | 0.342902657  | 0.739212474 | 0.739212474 | -5.57539995  |
| 1440997_at   | -0.036287852 | 4.340047542 | -0.342879796 | 0.739229125 | 0.739229125 | -5.575407427 |
| 1439804_at   | 0.028344109  | 6.275149273 | 0.342847431  | 0.739252699 | 0.739252699 | -5.575418011 |
| 1452791_at   | 0.032636076  | 8.971191736 | 0.342824825  | 0.739269164 | 0.739269164 | -5.575425403 |
| 1458997_at   | 0.026738475  | 6.736600314 | 0.342821012  | 0.739271941 | 0.739271941 | -5.575426649 |
| 1436606_at   | -0.02589494  | 7.536809995 | -0.342765071 | 0.739312688 | 0.739312688 | -5.575444939 |

|              |              |             |              |             |             |              |
|--------------|--------------|-------------|--------------|-------------|-------------|--------------|
| 1454406_at   | 0.024055669  | 6.359597804 | 0.342758168  | 0.739317716 | 0.739317716 | -5.575447196 |
| 1445540_at   | 0.041431749  | 5.317101173 | 0.342693012  | 0.739365176 | 0.739365176 | -5.575468495 |
| 1457897_at   | 0.024839918  | 5.76332529  | 0.342679494  | 0.739375022 | 0.739375022 | -5.575472913 |
| 1458845_at   | -0.026900658 | 3.942588143 | -0.342654088 | 0.739393529 | 0.739393529 | -5.575481217 |
| 1459586_at   | 0.039166551  | 3.262092849 | 0.342637011  | 0.739405969 | 0.739405969 | -5.575486798 |
| 1435317_x_at | 0.025306962  | 6.561367227 | 0.342626466  | 0.73941365  | 0.73941365  | -5.575490244 |
| 1438382_x_at | -0.036809395 | 4.300317065 | -0.342618614 | 0.739419369 | 0.739419369 | -5.57549281  |
| 1437216_at   | -0.032156036 | 9.081342394 | -0.342614674 | 0.739422239 | 0.739422239 | -5.575494097 |
| 1440900_at   | -0.035535195 | 3.679604335 | -0.342548919 | 0.739470138 | 0.739470138 | -5.575515583 |
| 1429963_at   | -0.035908241 | 6.706762175 | -0.342517889 | 0.739492742 | 0.739492742 | -5.575525721 |
| 1453783_at   | 0.027314961  | 4.322553108 | 0.342500662  | 0.739505291 | 0.739505291 | -5.575531349 |
| 1433715_at   | -0.026388144 | 4.929694154 | -0.342416313 | 0.739566737 | 0.739566737 | -5.5755589   |
| 1447185_at   | 0.024148277  | 3.517960288 | 0.342397198  | 0.739580663 | 0.739580663 | -5.575565143 |
| 1434951_at   | 0.034320516  | 6.467128403 | 0.342360568  | 0.739607347 | 0.739607347 | -5.575577105 |
| 1432840_at   | 0.038010562  | 3.933694358 | 0.342358735  | 0.739608683 | 0.739608683 | -5.575577704 |
| 1450434_s_at | 0.027321641  | 7.371539576 | 0.342278625  | 0.739667044 | 0.739667044 | -5.575603861 |
| 1447809_x_at | 0.032424858  | 6.880826286 | 0.342276335  | 0.739668713 | 0.739668713 | -5.575604608 |
| 1425338_at   | -0.038597197 | 6.164149415 | -0.342257127 | 0.739682707 | 0.739682707 | -5.575610879 |
| 1458658_at   | 0.021769489  | 3.570650792 | 0.342242514  | 0.739693352 | 0.739693352 | -5.575615649 |
| 1423229_at   | -0.031372073 | 7.984266315 | -0.342226988 | 0.739704664 | 0.739704664 | -5.575620718 |
| 1451327_a_at | -0.022300696 | 9.141528294 | -0.342184952 | 0.739735289 | 0.739735289 | -5.575634438 |
| 1418522_at   | -0.025269455 | 8.559014441 | -0.34216688  | 0.739748455 | 0.739748455 | -5.575640337 |
| 1448952_at   | 0.038780203  | 7.587295843 | 0.342166687  | 0.739748596 | 0.739748596 | -5.5756404   |
| 1433020_at   | 0.028410903  | 3.511056783 | 0.342102549  | 0.739795324 | 0.739795324 | -5.57566133  |
| 1458354_x_at | -0.035869417 | 3.616012144 | -0.342089955 | 0.739804501 | 0.739804501 | -5.57566544  |
| 1441145_at   | 0.050218292  | 7.175138423 | 0.342057566  | 0.739828098 | 0.739828098 | -5.575676008 |
| 1420176_x_at | 0.028176295  | 6.613799578 | 0.342007758  | 0.739864388 | 0.739864388 | -5.575692257 |
| 1455525_at   | -0.038446634 | 6.406214359 | -0.341991347 | 0.739876345 | 0.739876345 | -5.575697611 |
| 1430572_at   | -0.044659679 | 5.133315157 | -0.341987972 | 0.739878804 | 0.739878804 | -5.575698712 |
| 1415953_s_at | -0.032670404 | 7.338392729 | -0.341980952 | 0.739883919 | 0.739883919 | -5.575701002 |
| 1424554_at   | 0.021299976  | 9.297341176 | 0.341970734  | 0.739891364 | 0.739891364 | -5.575704335 |
| 1446153_at   | 0.024841272  | 4.064667754 | 0.341960986  | 0.739898467 | 0.739898467 | -5.575707515 |
| 1430417_s_at | -0.040049934 | 8.626671552 | -0.341838324 | 0.739987841 | 0.739987841 | -5.575747517 |
| 1437258_at   | -0.024346519 | 3.394709535 | -0.341756112 | 0.740047746 | 0.740047746 | -5.575774321 |
| 1416462_at   | 0.022062209  | 11.62906554 | 0.34174146   | 0.740058423 | 0.740058423 | -5.575779097 |
| 1418100_at   | -0.037853595 | 7.079087804 | -0.341711807 | 0.74008003  | 0.74008003  | -5.575788763 |
| 1448906_at   | -0.032197768 | 5.003423143 | -0.341681592 | 0.740102047 | 0.740102047 | -5.575798611 |
| 1458441_at   | -0.029491836 | 5.629377144 | -0.341680049 | 0.740103172 | 0.740103172 | -5.575799114 |
| 1427356_at   | 0.026222436  | 4.543909029 | 0.341635664  | 0.740135515 | 0.740135515 | -5.575813579 |
| 1422700_at   | -0.033684966 | 3.467293315 | -0.341635337 | 0.740135753 | 0.740135753 | -5.575813685 |
| 1444866_at   | 0.031273345  | 3.481601489 | 0.341621284  | 0.740145993 | 0.740145993 | -5.575818265 |
| 1431021_at   | -0.045250856 | 4.67183277  | -0.341597943 | 0.740163002 | 0.740163002 | -5.57582587  |
| 1425901_at   | 0.026961939  | 5.995507904 | 0.34157028   | 0.74018316  | 0.74018316  | -5.575834884 |
| 1432936_at   | -0.027862318 | 3.377242842 | -0.341554878 | 0.740194385 | 0.740194385 | -5.575839902 |
| 1448744_at   | -0.034878378 | 6.507670715 | -0.341543097 | 0.74020297  | 0.74020297  | -5.57584374  |
| 1418766_s_at | 0.029755204  | 4.016518998 | 0.341515473  | 0.7402231   | 0.7402231   | -5.57585274  |
| 1415975_at   | -0.022651009 | 8.502965096 | -0.34148468  | 0.74024554  | 0.74024554  | -5.57586277  |
| 1448453_at   | -0.023296379 | 4.292856871 | -0.34136519  | 0.740332619 | 0.740332619 | -5.575901686 |
| 1446982_at   | 0.04577425   | 6.797960298 | 0.341330529  | 0.74035788  | 0.74035788  | -5.575912972 |
| 1456075_at   | 0.035971616  | 3.513288264 | 0.341318291  | 0.740366798 | 0.740366798 | -5.575916957 |
| 1434994_at   | -0.021832987 | 7.300684685 | -0.341290998 | 0.740386689 | 0.740386689 | -5.575925842 |
| 1419873_s_at | -0.037943859 | 8.212241774 | -0.341213968 | 0.74044283  | 0.74044283  | -5.575950917 |
| 1451936_a_at | 0.023877973  | 5.924023441 | 0.341213659  | 0.740443055 | 0.740443055 | -5.575951018 |

|              |              |             |              |             |             |              |
|--------------|--------------|-------------|--------------|-------------|-------------|--------------|
| 1431262_at   | 0.030887253  | 5.080635829 | 0.341173233  | 0.740472518 | 0.740472518 | -5.575964175 |
| 1442155_at   | -0.041424363 | 7.999129595 | -0.341159451 | 0.740482563 | 0.740482563 | -5.57596866  |
| 1451426_at   | 0.041072868  | 4.655406052 | 0.341153698  | 0.740486756 | 0.740486756 | -5.575970533 |
| 1417130_s_at | 0.027113789  | 8.455826739 | 0.341117206  | 0.740513352 | 0.740513352 | -5.575982408 |
| 1426207_at   | 0.027875169  | 9.192552945 | 0.341018302  | 0.740585439 | 0.740585439 | -5.576014586 |
| 1457707_at   | 0.051958167  | 4.91140123  | 0.34092256   | 0.740655223 | 0.740655223 | -5.576045727 |
| 1450424_a_at | -0.036125829 | 6.139158339 | -0.34088991  | 0.740679022 | 0.740679022 | -5.576056345 |
| 1444625_at   | -0.027462252 | 5.17775989  | -0.34087081  | 0.740692944 | 0.740692944 | -5.576062556 |
| 1457034_at   | 0.030681189  | 8.125521258 | 0.340859314  | 0.740701324 | 0.740701324 | -5.576066294 |
| 1448281_a_at | -0.027081703 | 3.756311528 | -0.340849015 | 0.740708831 | 0.740708831 | -5.576069642 |
| 1420485_at   | 0.0282898    | 5.629818233 | 0.340837207  | 0.740717438 | 0.740717438 | -5.576073482 |
| 1441288_at   | 0.024911887  | 3.361248029 | 0.340807356  | 0.740739197 | 0.740739197 | -5.576083187 |
| 1456187_at   | 0.031261472  | 3.385281065 | 0.340805424  | 0.740740605 | 0.740740605 | -5.576083815 |
| 1457459_at   | -0.035166575 | 6.116571605 | -0.340788485 | 0.740752952 | 0.740752952 | -5.576089322 |
| 1448525_a_at | -0.026085465 | 8.865850722 | -0.340777036 | 0.740761298 | 0.740761298 | -5.576093044 |
| 1429636_at   | -0.040819988 | 3.521340482 | -0.340730818 | 0.740794988 | 0.740794988 | -5.576108067 |
| 1449095_at   | 0.031636138  | 8.394405234 | 0.340700296  | 0.740817238 | 0.740817238 | -5.576117988 |
| 1426796_at   | -0.027278314 | 8.753623332 | -0.340692898 | 0.74082263  | 0.74082263  | -5.576120392 |
| 1438218_at   | -0.025474376 | 7.671701245 | -0.340691331 | 0.740823772 | 0.740823772 | -5.576120901 |
| 1427007_at   | -0.049328561 | 5.967350021 | -0.340684671 | 0.740828628 | 0.740828628 | -5.576123066 |
| 1428505_at   | 0.022313842  | 9.596702668 | 0.340633126  | 0.740866202 | 0.740866202 | -5.576139817 |
| 1457413_at   | -0.050271531 | 7.408780649 | -0.340619448 | 0.740876173 | 0.740876173 | -5.576144261 |
| 1438598_at   | -0.026395653 | 5.413321123 | -0.340611914 | 0.740881665 | 0.740881665 | -5.576146709 |
| 1434336_s_at | 0.036074415  | 9.378011286 | 0.340498169  | 0.740964585 | 0.740964585 | -5.576183662 |
| 1439120_at   | 0.061185951  | 5.252564505 | 0.340467996  | 0.740986581 | 0.740986581 | -5.576193463 |
| 1447678_at   | -0.047655606 | 5.800432123 | -0.340464455 | 0.740989163 | 0.740989163 | -5.576194613 |
| 1433376_at   | -0.023182147 | 5.710956234 | -0.340437768 | 0.741008618 | 0.741008618 | -5.57620328  |
| 1442607_a_at | 0.029729548  | 3.939791519 | 0.340435413  | 0.741010335 | 0.741010335 | -5.576204045 |
| 1431930_x_at | 0.036628349  | 8.967304513 | 0.340422296  | 0.741019897 | 0.741019897 | -5.576208305 |
| 1454084_a_at | 0.04600465   | 6.418552595 | 0.340411751  | 0.741027585 | 0.741027585 | -5.576211729 |
| 1459849_x_at | 0.026221356  | 3.021747202 | 0.340406684  | 0.741031279 | 0.741031279 | -5.576213375 |
| 1447880_x_at | -0.027008006 | 7.784138144 | -0.34037493  | 0.741054429 | 0.741054429 | -5.576223686 |
| 1455743_at   | 0.071175901  | 6.528747598 | 0.340372485  | 0.741056211 | 0.741056211 | -5.57622448  |
| 1437900_at   | 0.03181289   | 5.977256341 | 0.340225866  | 0.741163107 | 0.741163107 | -5.576272078 |
| 1424780_a_at | 0.042023394  | 9.938126358 | 0.340204835  | 0.74117844  | 0.74117844  | -5.576278903 |
| 1427734_a_at | -0.032956659 | 5.169374204 | -0.340189507 | 0.741189616 | 0.741189616 | -5.576283878 |
| 1418675_at   | -0.039402339 | 4.10363841  | -0.340176291 | 0.741199251 | 0.741199251 | -5.576288167 |
| 1443900_at   | -0.028659852 | 4.78325411  | -0.340129333 | 0.741233488 | 0.741233488 | -5.576303405 |
| 1453106_a_at | 0.021919144  | 8.878207903 | 0.340082291  | 0.741267787 | 0.741267787 | -5.576318668 |
| 1443769_at   | 0.023237527  | 3.104198562 | 0.340054228  | 0.741288249 | 0.741288249 | -5.576327772 |
| 1430074_x_at | 0.041237541  | 6.067374808 | 0.340043842  | 0.741295822 | 0.741295822 | -5.576331142 |
| 1452753_at   | 0.022652092  | 8.341839037 | 0.34004042   | 0.741298317 | 0.741298317 | -5.576332252 |
| 1428657_at   | 0.030010875  | 8.515755863 | 0.339992916  | 0.741332954 | 0.741332954 | -5.576347661 |
| 1450454_at   | -0.028726337 | 4.172744203 | -0.339991175 | 0.741334223 | 0.741334223 | -5.576348226 |
| 1418720_at   | 0.022301164  | 8.101489663 | 0.339925316  | 0.741382245 | 0.741382245 | -5.576369585 |
| 1444571_at   | -0.032321436 | 3.988077021 | -0.339905915 | 0.741396391 | 0.741396391 | -5.576375876 |
| 1458917_at   | 0.022675854  | 6.84411235  | 0.339904901  | 0.741397131 | 0.741397131 | -5.576376205 |
| 1444418_at   | 0.031029197  | 3.893014845 | 0.339876872  | 0.741417569 | 0.741417569 | -5.576385294 |
| 1437359_at   | -0.030973937 | 8.088285546 | -0.339814434 | 0.741463098 | 0.741463098 | -5.576405537 |
| 1431313_at   | 0.03118417   | 3.844556561 | 0.339742782  | 0.741515347 | 0.741515347 | -5.576428764 |
| 1454756_at   | -0.027072748 | 8.931195318 | -0.339720741 | 0.741531419 | 0.741531419 | -5.576435907 |
| 1426659_a_at | 0.02280016   | 13.60047482 | 0.33972013   | 0.741531865 | 0.741531865 | -5.576436105 |
| 1420899_at   | 0.024406751  | 9.723313994 | 0.339718611  | 0.741532973 | 0.741532973 | -5.576436598 |

|                    |              |             |              |             |             |              |
|--------------------|--------------|-------------|--------------|-------------|-------------|--------------|
| 1437032_x_at       | 0.030757452  | 8.394946666 | 0.339691007  | 0.741553102 | 0.741553102 | -5.576445544 |
| 1417474_at         | -0.025030079 | 9.505483002 | -0.339687913 | 0.741555359 | 0.741555359 | -5.576446547 |
| 1439145_at         | 0.029302752  | 3.383182852 | 0.339635487  | 0.741593589 | 0.741593589 | -5.576463535 |
| 1459595_at         | -0.052303661 | 7.457813543 | -0.339579336 | 0.741634537 | 0.741634537 | -5.576481727 |
| 1456136_at         | 0.029466876  | 4.687692642 | 0.339563148  | 0.741646343 | 0.741646343 | -5.576486972 |
| 1422835_at         | -0.053359997 | 4.587295318 | -0.339508157 | 0.741686446 | 0.741686446 | -5.576504785 |
| 1427725_a_at       | 0.026676829  | 4.565477907 | 0.339447106  | 0.74173097  | 0.74173097  | -5.576524558 |
| 1429282_at         | -0.022045373 | 7.479428349 | -0.339436873 | 0.741738433 | 0.741738433 | -5.576527872 |
| 1419290_at         | 0.028004629  | 8.406327918 | 0.339435331  | 0.741739558 | 0.741739558 | -5.576528371 |
| 1419583_at         | 0.022069726  | 9.676680319 | 0.33942915   | 0.741744065 | 0.741744065 | -5.576530373 |
| 1429999_at         | -0.03473654  | 4.58726686  | -0.339427657 | 0.741745154 | 0.741745154 | -5.576530856 |
| 1456911_at         | 0.040481161  | 4.529494753 | 0.3393696    | 0.741787496 | 0.741787496 | -5.576549655 |
| 1458181_at         | -0.041763848 | 5.458251466 | -0.339356116 | 0.74179733  | 0.74179733  | -5.576554021 |
| 1442597_at         | -0.025326928 | 3.698593203 | -0.339349904 | 0.74180186  | 0.74180186  | -5.576556032 |
| 1428481_s_at       | -0.023731132 | 9.736798579 | -0.339221002 | 0.741895874 | 0.741895874 | -5.576597757 |
| 1433334_at         | 0.022063012  | 8.150010415 | 0.33920277   | 0.741909171 | 0.741909171 | -5.576603658 |
| 1438962_s_at       | 0.025356006  | 6.275836367 | 0.339139587  | 0.741955255 | 0.741955255 | -5.576624103 |
| 1423094_at         | 0.031651909  | 8.505866592 | 0.33910561   | 0.741980037 | 0.741980037 | -5.576635096 |
| 1445667_at         | -0.031596614 | 3.983028536 | -0.339046605 | 0.742023075 | 0.742023075 | -5.576654184 |
| 1459360_at         | 0.028193196  | 6.579311959 | 0.338974866  | 0.742075402 | 0.742075402 | -5.576677388 |
| 1434768_at         | 0.027261613  | 8.403825126 | 0.338939252  | 0.74210138  | 0.74210138  | -5.576688905 |
| 1429401_at         | -0.030276294 | 9.149434795 | -0.338934146 | 0.742105105 | 0.742105105 | -5.576690556 |
| 1426310_at         | 0.029616672  | 8.268519215 | 0.338918543  | 0.742116486 | 0.742116486 | -5.576695602 |
| 1438077_at         | 0.022264572  | 3.332659991 | 0.338896007  | 0.742132925 | 0.742132925 | -5.576702888 |
| 1448883_at         | 0.030420128  | 9.040371354 | 0.338872626  | 0.74214998  | 0.74214998  | -5.576710448 |
| 1448929_at         | 0.07859124   | 9.566923643 | 0.338863141  | 0.742156899 | 0.742156899 | -5.576713515 |
| 1426951_at         | 0.026884629  | 7.357609063 | 0.338853234  | 0.742164125 | 0.742164125 | -5.576716718 |
| 1457434_s_at       | 0.028918799  | 10.11369021 | 0.338840625  | 0.742173323 | 0.742173323 | -5.576720794 |
| 1437461_s_at       | 0.047016458  | 7.745582067 | 0.338839943  | 0.742173821 | 0.742173821 | -5.576721014 |
| 1422022_at         | 0.028818209  | 4.764943943 | 0.338830924  | 0.7421804   | 0.7421804   | -5.57672393  |
| 1448588_at         | -0.033800409 | 4.280235204 | -0.338783547 | 0.74221496  | 0.74221496  | -5.576739245 |
| 1436224_at         | -0.039566398 | 6.120062703 | -0.338737256 | 0.742248728 | 0.742248728 | -5.576754207 |
| 1418218_at         | -0.028308369 | 4.898486703 | -0.338717418 | 0.7422632   | 0.7422632   | -5.576760618 |
| 1445654_at         | 0.031799141  | 4.188584753 | 0.338692195  | 0.7422816   | 0.7422816   | -5.576768769 |
| 1457623_x_at       | -0.036226194 | 4.913990758 | -0.338632694 | 0.742325007 | 0.742325007 | -5.576787995 |
| 1458213_at         | -0.039521707 | 5.7845627   | -0.338554431 | 0.742382101 | 0.742382101 | -5.576813278 |
| 1452058_a_at       | 0.042181615  | 10.09298287 | 0.338534157  | 0.742396892 | 0.742396892 | -5.576819827 |
| AFFX-r2-Ec-bioB-5_ | 0.02881567   | 8.150253232 | 0.338523814  | 0.742404437 | 0.742404437 | -5.576823167 |
| 1425621_at         | -0.033391948 | 8.250411532 | -0.338522884 | 0.742405116 | 0.742405116 | -5.576823468 |
| 1454330_at         | 0.025200746  | 3.929499746 | 0.338469264  | 0.742444234 | 0.742444234 | -5.576840785 |
| 1424048_a_at       | 0.02871717   | 8.408460394 | 0.338466153  | 0.742446504 | 0.742446504 | -5.57684179  |
| 1453270_a_at       | 0.029280327  | 7.111340754 | 0.338451288  | 0.742457349 | 0.742457349 | -5.57684659  |
| 1432408_a_at       | 0.026196251  | 3.262975261 | 0.338445167  | 0.742461815 | 0.742461815 | -5.576848567 |
| 1417451_a_at       | 0.020713266  | 13.63853337 | 0.338410332  | 0.742487229 | 0.742487229 | -5.576859815 |
| 1430514_a_at       | -0.070924436 | 7.875388252 | -0.338395563 | 0.742498005 | 0.742498005 | -5.576864584 |
| 1459247_at         | 0.028045382  | 4.508929253 | 0.338335581  | 0.742541767 | 0.742541767 | -5.576883948 |
| 1424717_at         | 0.030101584  | 7.883743782 | 0.338280771  | 0.742581756 | 0.742581756 | -5.57690164  |
| 1442782_at         | 0.037716732  | 4.950578654 | 0.338236517  | 0.742614045 | 0.742614045 | -5.576915923 |
| 1429125_at         | -0.02370525  | 7.024901169 | -0.338165226 | 0.74266606  | 0.74266606  | -5.576938928 |
| 1457119_at         | 0.033602476  | 4.486342591 | 0.338051452  | 0.742749076 | 0.742749076 | -5.576975632 |
| 1423541_at         | -0.034151101 | 4.230640682 | -0.338036732 | 0.742759818 | 0.742759818 | -5.57698038  |
| 1434052_at         | 0.033843769  | 3.67237169  | 0.338032405  | 0.742762975 | 0.742762975 | -5.576981775 |
| 1429261_at         | -0.021761779 | 6.584310155 | -0.338006409 | 0.742781944 | 0.742781944 | -5.57699016  |

|              |              |             |              |             |             |              |
|--------------|--------------|-------------|--------------|-------------|-------------|--------------|
| 1458274_at   | 0.026737399  | 6.493802215 | 0.337991137  | 0.742793087 | 0.742793087 | -5.576995085 |
| 1434471_at   | 0.038358585  | 8.118707508 | 0.337979648  | 0.742801471 | 0.742801471 | -5.57699879  |
| 1426141_at   | -0.023649567 | 4.542877794 | -0.337884809 | 0.742870675 | 0.742870675 | -5.57702937  |
| 1447503_at   | -0.03121894  | 3.338663152 | -0.337834332 | 0.74290751  | 0.74290751  | -5.577045642 |
| 1454486_at   | -0.027573357 | 4.525129602 | -0.337782295 | 0.742945483 | 0.742945483 | -5.577062415 |
| 1454338_at   | 0.047940943  | 6.162119472 | 0.337774368  | 0.742951267 | 0.742951267 | -5.57706497  |
| 1452796_at   | 0.027950887  | 6.93672225  | 0.337749112  | 0.742969698 | 0.742969698 | -5.577073109 |
| 1447693_s_at | 0.032788465  | 9.741571277 | 0.337735753  | 0.742979447 | 0.742979447 | -5.577077415 |
| 1444297_at   | -0.036493285 | 3.835485931 | -0.337720229 | 0.742990775 | 0.742990775 | -5.577082417 |
| 1450042_at   | -0.027880112 | 3.790639025 | -0.337696482 | 0.743008105 | 0.743008105 | -5.577090069 |
| 1435151_a_at | -0.024184308 | 13.18515345 | -0.337668028 | 0.74302887  | 0.74302887  | -5.577099237 |
| 1440781_at   | -0.028941422 | 7.415294048 | -0.337666079 | 0.743030293 | 0.743030293 | -5.577099865 |
| 1419842_at   | 0.043744485  | 3.957782895 | 0.337618963  | 0.743064677 | 0.743064677 | -5.577115045 |
| 1453178_at   | 0.021938237  | 3.705343592 | 0.337607875  | 0.743072769 | 0.743072769 | -5.577118617 |
| 1417991_at   | 0.023991489  | 3.678097967 | 0.337607381  | 0.74307313  | 0.74307313  | -5.577118776 |
| 1425081_at   | 0.034998128  | 6.24190133  | 0.337585054  | 0.743089424 | 0.743089424 | -5.577125968 |
| 1449404_at   | 0.030889312  | 7.264736057 | 0.337581329  | 0.743092142 | 0.743092142 | -5.577127168 |
| 1435680_a_at | 0.030898145  | 5.974709758 | 0.337570519  | 0.743100031 | 0.743100031 | -5.57713065  |
| 1424364_a_at | -0.0226084   | 10.41988199 | -0.337556667 | 0.74311014  | 0.74311014  | -5.577135112 |
| 1424077_at   | -0.033952677 | 7.817328687 | -0.337530443 | 0.743129279 | 0.743129279 | -5.577143558 |
| 1435092_at   | -0.036450687 | 6.771075353 | -0.337492252 | 0.743157151 | 0.743157151 | -5.577155857 |
| 1444306_at   | -0.023481255 | 7.108858003 | -0.337474438 | 0.743170153 | 0.743170153 | -5.577161594 |
| 1446609_at   | 0.036056727  | 5.993994369 | 0.337451297  | 0.743187041 | 0.743187041 | -5.577169045 |
| 1439970_at   | -0.035618072 | 5.935098757 | -0.33744824  | 0.743189273 | 0.743189273 | -5.57717003  |
| 1449999_a_at | -0.030059568 | 7.261450798 | -0.337426907 | 0.743204843 | 0.743204843 | -5.577176899 |
| 1442261_at   | 0.021753356  | 3.32128503  | 0.337423069  | 0.743207643 | 0.743207643 | -5.577178134 |
| 1434366_x_at | 0.045958083  | 7.157072158 | 0.337420556  | 0.743209477 | 0.743209477 | -5.577178943 |
| 1417796_at   | -0.024963537 | 7.073379593 | -0.337407987 | 0.743218651 | 0.743218651 | -5.57718299  |
| 1416100_at   | 0.020633916  | 10.98096696 | 0.337398767  | 0.74322538  | 0.74322538  | -5.577185958 |
| 1442523_at   | 0.026751004  | 5.235656225 | 0.337397445  | 0.743226345 | 0.743226345 | -5.577186384 |
| 1457702_at   | 0.035212124  | 3.332961745 | 0.337393322  | 0.743229354 | 0.743229354 | -5.577187711 |
| 1459357_at   | -0.033061877 | 4.819319739 | -0.337341039 | 0.743267514 | 0.743267514 | -5.577204542 |
| 1458926_at   | 0.057306199  | 6.320753716 | 0.337305819  | 0.743293219 | 0.743293219 | -5.577215879 |
| 1427414_at   | -0.055578956 | 6.848429668 | -0.337300656 | 0.743296987 | 0.743296987 | -5.57721754  |
| 1422266_at   | 0.026783414  | 3.927456255 | 0.337288813  | 0.743305632 | 0.743305632 | -5.577221352 |
| 1448413_at   | 0.03435649   | 8.110348783 | 0.337166521  | 0.743394892 | 0.743394892 | -5.577260704 |
| 1430128_a_at | 0.049965648  | 5.464024261 | 0.337116884  | 0.743431122 | 0.743431122 | -5.577276672 |
| 1449628_s_at | 0.022408739  | 10.10450634 | 0.337101755  | 0.743442166 | 0.743442166 | -5.577281539 |
| 1450761_s_at | -0.088261302 | 5.757001337 | -0.337100494 | 0.743443086 | 0.743443086 | -5.577281945 |
| 1415721_a_at | -0.03385956  | 8.586547529 | -0.337070929 | 0.743464666 | 0.743464666 | -5.577291454 |
| 1420644_a_at | -0.022581604 | 9.373529422 | -0.336989614 | 0.743524022 | 0.743524022 | -5.577317606 |
| 1417956_at   | 0.036093433  | 4.432037805 | 0.336986099  | 0.743526588 | 0.743526588 | -5.577318736 |
| 1429573_at   | -0.031437383 | 4.858930563 | -0.336965602 | 0.74354155  | 0.74354155  | -5.577325327 |
| 1434641_x_at | -0.040475531 | 4.669587367 | -0.33695796  | 0.743547128 | 0.743547128 | -5.577327784 |
| 1434377_x_at | -0.020680658 | 13.90968684 | -0.33692445  | 0.743571589 | 0.743571589 | -5.577338558 |
| 1418368_at   | -0.04563967  | 4.097819489 | -0.336915961 | 0.743577786 | 0.743577786 | -5.577341287 |
| 1420574_at   | -0.024696082 | 4.421887818 | -0.336892917 | 0.743594608 | 0.743594608 | -5.577348696 |
| 1448207_at   | 0.053320993  | 7.095196659 | 0.33680624   | 0.743657882 | 0.743657882 | -5.577376557 |
| 1431890_a_at | 0.029285752  | 7.878288644 | 0.33680576   | 0.743658232 | 0.743658232 | -5.577376711 |
| 1441895_x_at | 0.028953125  | 3.888310165 | 0.336780194  | 0.743676896 | 0.743676896 | -5.577384927 |
| 1458493_a_at | -0.028427653 | 6.124498531 | -0.336701929 | 0.743734031 | 0.743734031 | -5.577410077 |
| 1433183_at   | -0.024881795 | 3.493362265 | -0.336654406 | 0.743768725 | 0.743768725 | -5.577425345 |
| 1456026_at   | 0.028392178  | 7.113201176 | 0.336626565  | 0.743789051 | 0.743789051 | -5.577434288 |

|              |              |             |              |             |             |              |
|--------------|--------------|-------------|--------------|-------------|-------------|--------------|
| 1430120_at   | 0.032561846  | 3.451354729 | 0.336611581  | 0.743799989 | 0.743799989 | -5.577439101 |
| 1451096_at   | -0.025605382 | 10.85509933 | -0.336601444 | 0.74380739  | 0.74380739  | -5.577442358 |
| 1427937_at   | -0.034086861 | 7.828271438 | -0.336590981 | 0.743815029 | 0.743815029 | -5.577445718 |
| 1423517_at   | 0.024092765  | 11.86650652 | 0.336578642  | 0.743824037 | 0.743824037 | -5.577449682 |
| 1430540_at   | 0.022090065  | 5.841119305 | 0.336536595  | 0.743854734 | 0.743854734 | -5.577463186 |
| 1447468_at   | 0.026918314  | 3.730202587 | 0.336514496  | 0.743870869 | 0.743870869 | -5.577470282 |
| 1444891_at   | 0.024230191  | 3.437765165 | 0.33650403   | 0.74387851  | 0.74387851  | -5.577473643 |
| 1448094_at   | -0.024932856 | 5.185165237 | -0.336496848 | 0.743883753 | 0.743883753 | -5.577475949 |
| 1445149_at   | -0.035350691 | 4.27115934  | -0.336495706 | 0.743884587 | 0.743884587 | -5.577476316 |
| 1424721_at   | 0.027228339  | 9.215466191 | 0.336419338  | 0.743940343 | 0.743940343 | -5.577500836 |
| 1422066_x_at | -0.026392356 | 3.136490988 | -0.336395939 | 0.743957427 | 0.743957427 | -5.577508347 |
| 1444490_at   | 0.028572601  | 6.257287824 | 0.336386401  | 0.743964391 | 0.743964391 | -5.577511409 |
| 1421785_at   | 0.032081369  | 5.356121871 | 0.336304497  | 0.744024192 | 0.744024192 | -5.577537698 |
| 1427627_at   | 0.023948663  | 3.981257451 | 0.336287601  | 0.744036528 | 0.744036528 | -5.57754312  |
| 1449567_at   | -0.025558331 | 3.680633104 | -0.336286766 | 0.744037138 | 0.744037138 | -5.577543388 |
| 1458083_at   | -0.041846806 | 6.191314276 | -0.33619658  | 0.744102988 | 0.744102988 | -5.577572326 |
| 1445079_at   | 0.033388065  | 5.959450461 | 0.336163117  | 0.744127422 | 0.744127422 | -5.577583061 |
| 1439159_at   | -0.025677213 | 8.116379805 | -0.336149248 | 0.744137549 | 0.744137549 | -5.57758751  |
| 1437819_s_at | -0.023206955 | 6.909315361 | -0.336140406 | 0.744144005 | 0.744144005 | -5.577590347 |
| 1435669_at   | 0.021970888  | 9.183823932 | 0.336121067  | 0.744158126 | 0.744158126 | -5.57759655  |
| 1443919_at   | -0.029860946 | 3.668020952 | -0.336111463 | 0.744165139 | 0.744165139 | -5.57759963  |
| 1455583_at   | -0.031076506 | 6.614982905 | -0.33610737  | 0.744168128 | 0.744168128 | -5.577600943 |
| 1459146_at   | 0.034036584  | 4.6833111   | 0.336105756  | 0.744169306 | 0.744169306 | -5.577601461 |
| 1440782_at   | 0.027160721  | 3.153115943 | 0.336070558  | 0.744195008 | 0.744195008 | -5.57761275  |
| 1444550_at   | 0.039676735  | 5.349874867 | 0.335992815  | 0.744251777 | 0.744251777 | -5.57763768  |
| 1415981_at   | 0.030035182  | 8.860600084 | 0.335989614  | 0.744254115 | 0.744254115 | -5.577638707 |
| 1426751_s_at | 0.021525608  | 9.396876982 | 0.335864835  | 0.744345233 | 0.744345233 | -5.577678708 |
| 1429598_at   | -0.032983534 | 4.302269656 | -0.335749521 | 0.744429444 | 0.744429444 | -5.577715662 |
| 1433004_at   | -0.023417263 | 4.464988169 | -0.335707694 | 0.744459991 | 0.744459991 | -5.577729064 |
| 1446358_at   | 0.04040393   | 3.943871075 | 0.335658045  | 0.74449625  | 0.74449625  | -5.577744969 |
| 1431833_a_at | -0.050201608 | 5.060777232 | -0.335610115 | 0.744531254 | 0.744531254 | -5.577760321 |
| 1446971_at   | 0.039817422  | 4.05839722  | 0.335576679  | 0.744555673 | 0.744555673 | -5.57777103  |
| 1430287_s_at | 0.021192794  | 7.549854486 | 0.33551685   | 0.744599369 | 0.744599369 | -5.577790188 |
| 1418409_at   | 0.029090524  | 7.259675129 | 0.335511171  | 0.744603517 | 0.744603517 | -5.577792007 |
| 1422785_at   | 0.02774434   | 9.174094439 | 0.335509178  | 0.744604972 | 0.744604972 | -5.577792645 |
| 1435568_at   | 0.02503712   | 8.934424922 | 0.335493847  | 0.74461617  | 0.74461617  | -5.577797554 |
| 1452975_at   | -0.021812439 | 4.032389912 | -0.335480546 | 0.744625884 | 0.744625884 | -5.577801812 |
| 1431770_at   | -0.021663155 | 5.250391027 | -0.335473873 | 0.744630758 | 0.744630758 | -5.577803949 |
| 1456185_at   | 0.045934311  | 3.782801896 | 0.335456406  | 0.744643515 | 0.744643515 | -5.577809541 |
| 1459992_x_at | -0.024715243 | 7.776206176 | -0.335432622 | 0.744660886 | 0.744660886 | -5.577817155 |
| 1456893_at   | -0.03606753  | 4.412384516 | -0.335326682 | 0.744738264 | 0.744738264 | -5.577851063 |
| 1417950_a_at | -0.027711857 | 4.660845264 | -0.335319354 | 0.744743616 | 0.744743616 | -5.577853408 |
| 1458473_at   | -0.025784443 | 4.17051001  | -0.33529406  | 0.744762091 | 0.744762091 | -5.577861502 |
| 1451478_at   | 0.026026184  | 5.367908437 | 0.335222986  | 0.744814005 | 0.744814005 | -5.577884243 |
| 1426112_a_at | -0.025711208 | 4.630286812 | -0.335169222 | 0.744853277 | 0.744853277 | -5.577901442 |
| 1455707_at   | -0.031268354 | 4.440585253 | -0.33514145  | 0.744873562 | 0.744873562 | -5.577910325 |
| 1441825_x_at | 0.037871029  | 4.831608123 | 0.335141127  | 0.744873798 | 0.744873798 | -5.577910428 |
| 1421899_a_at | -0.028926313 | 6.742725326 | -0.335097338 | 0.744905785 | 0.744905785 | -5.577924433 |
| 1445673_at   | -0.026943627 | 3.946182127 | -0.335095669 | 0.744907004 | 0.744907004 | -5.577924967 |
| 1416095_x_at | 0.023353141  | 10.3820328  | 0.335060328  | 0.744932819 | 0.744932819 | -5.577936269 |
| 1432670_at   | -0.023932786 | 3.414662315 | -0.33502573  | 0.744958092 | 0.744958092 | -5.577947332 |
| 1429882_at   | 0.064625142  | 8.423690335 | 0.335025468  | 0.744958284 | 0.744958284 | -5.577947415 |
| 1433556_at   | -0.030720982 | 6.27866937  | -0.334977357 | 0.744993429 | 0.744993429 | -5.577962798 |

|              |              |             |              |             |             |              |
|--------------|--------------|-------------|--------------|-------------|-------------|--------------|
| 1443348_at   | -0.024952609 | 3.952762983 | -0.334929451 | 0.745028424 | 0.745028424 | -5.577978112 |
| 1417269_at   | 0.0209786    | 10.01660065 | 0.334924263  | 0.745032214 | 0.745032214 | -5.57797977  |
| 1423202_a_at | -0.025551468 | 10.27542443 | -0.334900795 | 0.745049358 | 0.745049358 | -5.577987271 |
| 1457412_at   | 0.021016162  | 3.880167898 | 0.33488336   | 0.745062094 | 0.745062094 | -5.577992844 |
| 1423632_at   | 0.030933932  | 4.98794008  | 0.334829039  | 0.745101777 | 0.745101777 | -5.578010204 |
| 1439458_x_at | -0.039460408 | 3.68023308  | -0.334812213 | 0.745114069 | 0.745114069 | -5.578015581 |
| 1428953_at   | 0.025386238  | 7.92639207  | 0.334786992  | 0.745132494 | 0.745132494 | -5.57802364  |
| 1421622_a_at | 0.037150295  | 4.529254683 | 0.334723977  | 0.745178531 | 0.745178531 | -5.578043772 |
| 1460443_at   | -0.023765631 | 8.473024703 | -0.334718544 | 0.7451825   | 0.7451825   | -5.578045508 |
| 1456040_at   | 0.023753393  | 9.323151659 | 0.334633898  | 0.74524434  | 0.74524434  | -5.578072545 |
| 1457238_at   | -0.029655321 | 4.389751764 | -0.334632427 | 0.745245415 | 0.745245415 | -5.578073015 |
| 1425332_at   | 0.022819413  | 10.22336617 | 0.334599112  | 0.745269755 | 0.745269755 | -5.578083655 |
| 1438012_at   | 0.037375296  | 7.20620625  | 0.334564052  | 0.74529537  | 0.74529537  | -5.57809485  |
| 1455248_at   | -0.036112282 | 8.434699796 | -0.334554276 | 0.745302512 | 0.745302512 | -5.578097972 |
| 1442029_at   | 0.054333109  | 7.92518944  | 0.33453956   | 0.745313263 | 0.745313263 | -5.57810267  |
| 1445532_at   | 0.037682398  | 4.403354163 | 0.334456583  | 0.745373889 | 0.745373889 | -5.578129161 |
| 1456190_a_at | -0.026760548 | 3.599677403 | -0.334449331 | 0.745379188 | 0.745379188 | -5.578131476 |
| 1439264_x_at | 0.031953726  | 10.00684004 | 0.334446329  | 0.745381381 | 0.745381381 | -5.578132434 |
| 1455846_at   | 0.028603201  | 4.814575003 | 0.334437991  | 0.745387473 | 0.745387473 | -5.578135096 |
| 1456295_at   | 0.03909358   | 7.321720382 | 0.33430165   | 0.745487092 | 0.745487092 | -5.578178607 |
| 1426198_at   | 0.027396959  | 3.127347978 | 0.334292033  | 0.745494119 | 0.745494119 | -5.578181675 |
| 1435150_at   | -0.024789809 | 5.966891888 | -0.334262902 | 0.745515405 | 0.745515405 | -5.578190969 |
| 1428309_s_at | 0.020021606  | 9.293640072 | 0.334251605  | 0.745523659 | 0.745523659 | -5.578194573 |
| 1426931_s_at | 0.0237303    | 8.704283024 | 0.334222879  | 0.745544649 | 0.745544649 | -5.578203737 |
| 1439792_at   | -0.023202539 | 4.331518876 | -0.334196399 | 0.745563998 | 0.745563998 | -5.578212184 |
| 1454623_at   | -0.030479814 | 5.245718518 | -0.334193534 | 0.745566091 | 0.745566091 | -5.578213097 |
| 1427442_a_at | 0.022061437  | 12.15121358 | 0.334142526  | 0.745603363 | 0.745603363 | -5.578229366 |
| 1453859_at   | 0.026083904  | 3.201055064 | 0.334129317  | 0.745613016 | 0.745613016 | -5.578233579 |
| 1449905_at   | -0.023451765 | 5.052881135 | -0.33409566  | 0.74563761  | 0.74563761  | -5.578244312 |
| 1453845_at   | 0.021723766  | 3.724330914 | 0.334059134  | 0.745664301 | 0.745664301 | -5.578255958 |
| 1446073_at   | -0.030244786 | 6.399595271 | -0.33404498  | 0.745674644 | 0.745674644 | -5.578260471 |
| 1454019_at   | 0.024459056  | 5.062721024 | 0.333938777  | 0.745752253 | 0.745752253 | -5.578294327 |
| 1440378_at   | 0.020543066  | 5.347648351 | 0.333927995  | 0.745760132 | 0.745760132 | -5.578297763 |
| 1436543_at   | 0.057703972  | 7.334006667 | 0.333920683  | 0.745765475 | 0.745765475 | -5.578300094 |
| 1439244_a_at | 0.021575899  | 11.27515577 | 0.333920567  | 0.74576556  | 0.74576556  | -5.578300131 |
| 1441394_at   | -0.032788125 | 4.562433371 | -0.333896645 | 0.745783042 | 0.745783042 | -5.578307755 |
| 1429134_at   | 0.02229889   | 5.601988662 | 0.333896072  | 0.745783461 | 0.745783461 | -5.578307937 |
| 1416974_at   | -0.021261682 | 8.20768185  | -0.333869573 | 0.745802826 | 0.745802826 | -5.578316382 |
| 1436811_at   | 0.033605942  | 8.733389457 | 0.333864102  | 0.745806824 | 0.745806824 | -5.578318125 |
| 1420403_at   | 0.022343215  | 4.435426743 | 0.333857992  | 0.74581129  | 0.74581129  | -5.578320072 |
| 1417487_at   | -0.025869479 | 4.598670239 | -0.333696612 | 0.745929229 | 0.745929229 | -5.578371485 |
| 1434609_at   | -0.022336579 | 9.03047437  | -0.333672405 | 0.745946921 | 0.745946921 | -5.578379195 |
| 1424020_at   | 0.038717028  | 8.951563058 | 0.333606553  | 0.745995049 | 0.745995049 | -5.578400166 |
| 1436948_a_at | 0.039140268  | 8.160582859 | 0.333604896  | 0.74599626  | 0.74599626  | -5.578400693 |
| 1442025_a_at | -0.037136986 | 4.82041802  | -0.333582264 | 0.7460128   | 0.7460128   | -5.578407899 |
| 1428168_at   | 0.021584297  | 10.1779068  | 0.333529638  | 0.746051264 | 0.746051264 | -5.578424654 |
| 1426506_at   | 0.022557967  | 3.494435689 | 0.333394121  | 0.746150314 | 0.746150314 | -5.578467788 |
| 1432528_at   | 0.024166944  | 4.879503301 | 0.333333905  | 0.746194327 | 0.746194327 | -5.578486948 |
| 1424243_at   | -0.024441561 | 9.327431928 | -0.333322279 | 0.746202825 | 0.746202825 | -5.578490647 |
| 1448123_s_at | 0.030044836  | 10.48321562 | 0.333318231  | 0.746205783 | 0.746205783 | -5.578491935 |
| 1425301_at   | 0.03611944   | 4.297377682 | 0.333310461  | 0.746211464 | 0.746211464 | -5.578494407 |
| 1423431_a_at | -0.0236139   | 10.56922487 | -0.333254136 | 0.746252634 | 0.746252634 | -5.578512326 |
| 1426106_a_at | -0.037367588 | 5.197073369 | -0.333242013 | 0.746261496 | 0.746261496 | -5.578516182 |

|              |              |             |              |             |             |              |
|--------------|--------------|-------------|--------------|-------------|-------------|--------------|
| 1425198_at   | -0.044453673 | 3.681951646 | -0.333232247 | 0.746268634 | 0.746268634 | -5.578519288 |
| 1430080_at   | 0.034827727  | 5.579277834 | 0.333217944  | 0.746279089 | 0.746279089 | -5.578523837 |
| 1444867_at   | 0.023165136  | 3.530247781 | 0.333213211  | 0.746282548 | 0.746282548 | -5.578525343 |
| 1449458_at   | 0.027138738  | 5.159318761 | 0.333187362  | 0.746301443 | 0.746301443 | -5.578533564 |
| 1428466_at   | 0.051583748  | 10.3207737  | 0.333170166  | 0.746314014 | 0.746314014 | -5.578539033 |
| 1444459_at   | -0.033017914 | 7.348679077 | -0.333095981 | 0.746368242 | 0.746368242 | -5.578562622 |
| 1447716_x_at | 0.028210134  | 3.103251193 | 0.333082595  | 0.746378027 | 0.746378027 | -5.578566878 |
| 1426464_at   | -0.035112946 | 4.592878308 | -0.333054089 | 0.746398865 | 0.746398865 | -5.578575941 |
| 1451085_at   | -0.025837087 | 5.490642461 | -0.33305249  | 0.746400034 | 0.746400034 | -5.578576449 |
| 1454995_at   | 0.033413482  | 8.688517655 | 0.333026942  | 0.74641871  | 0.74641871  | -5.578584571 |
| 1417465_at   | 0.020989089  | 10.56102291 | 0.333023749  | 0.746421044 | 0.746421044 | -5.578585586 |
| 1426380_at   | 0.021569104  | 11.38857296 | 0.333021243  | 0.746422876 | 0.746422876 | -5.578586382 |
| 1439948_at   | 0.055485829  | 5.224633979 | 0.333019222  | 0.746424354 | 0.746424354 | -5.578587025 |
| 1436973_at   | 0.026814582  | 3.251558397 | 0.333008685  | 0.746432056 | 0.746432056 | -5.578590374 |
| 1449847_a_at | 0.04174581   | 5.40166545  | 0.333003983  | 0.746435494 | 0.746435494 | -5.578591869 |
| 1424272_at   | 0.023437999  | 6.017690332 | 0.332990923  | 0.746445041 | 0.746445041 | -5.57859602  |
| 1429236_at   | -0.03646005  | 3.611904609 | -0.332988958 | 0.746446477 | 0.746446477 | -5.578596645 |
| 1418244_at   | -0.025455838 | 9.61841282  | -0.332935936 | 0.746485238 | 0.746485238 | -5.578613496 |
| 1434241_at   | -0.02324754  | 8.389035836 | -0.332935257 | 0.746485734 | 0.746485734 | -5.578613712 |
| 1421885_at   | 0.042510431  | 5.760625502 | 0.33293235   | 0.746487859 | 0.746487859 | -5.578614636 |
| 1456869_at   | 0.037585923  | 4.569603815 | 0.332914222  | 0.746501112 | 0.746501112 | -5.578620397 |
| 1456292_a_at | 0.031723266  | 11.92265536 | 0.332901641  | 0.746510309 | 0.746510309 | -5.578624395 |
| 1416306_at   | -0.029324106 | 3.404981904 | -0.332858755 | 0.746541662 | 0.746541662 | -5.578638022 |
| 1430597_at   | 0.022096684  | 3.566896423 | 0.332773132  | 0.746604259 | 0.746604259 | -5.578665223 |
| 1438684_at   | 0.02163526   | 8.518260174 | 0.332737913  | 0.746630007 | 0.746630007 | -5.57867641  |
| 1457502_at   | 0.035250683  | 4.130163068 | 0.332705681  | 0.746653571 | 0.746653571 | -5.578686647 |
| 1460158_at   | -0.022685869 | 4.345280353 | -0.332705308 | 0.746653844 | 0.746653844 | -5.578686765 |
| 1457738_at   | -0.033783443 | 3.151167433 | -0.332701298 | 0.746656776 | 0.746656776 | -5.578688039 |
| 1437650_at   | -0.027650998 | 6.96042569  | -0.332677967 | 0.746673833 | 0.746673833 | -5.578695448 |
| 1450936_a_at | 0.037680464  | 5.516381377 | 0.332626854  | 0.746711203 | 0.746711203 | -5.578711678 |
| 1427478_at   | -0.037043024 | 5.76075439  | -0.332596992 | 0.746733036 | 0.746733036 | -5.578721159 |
| 1453405_at   | -0.02520937  | 4.136617928 | -0.332495776 | 0.74680704  | 0.74680704  | -5.578753289 |
| 1444200_at   | 0.028843469  | 5.236896001 | 0.332439625  | 0.746848095 | 0.746848095 | -5.578771109 |
| 1444947_at   | -0.026600998 | 5.195310227 | -0.332349505 | 0.74691399  | 0.74691399  | -5.578799704 |
| 1439110_at   | -0.039387003 | 4.267021591 | -0.332307643 | 0.746944599 | 0.746944599 | -5.578812984 |
| 1455370_at   | 0.045483013  | 4.170805338 | 0.332297999  | 0.746951651 | 0.746951651 | -5.578816043 |
| 1456912_at   | -0.023559862 | 7.715507049 | -0.332289656 | 0.746957752 | 0.746957752 | -5.57881869  |
| 1424124_at   | -0.034894782 | 8.265384087 | -0.332267508 | 0.746973947 | 0.746973947 | -5.578825715 |
| 1437313_x_at | 0.054766597  | 10.07307011 | 0.332188174  | 0.747031958 | 0.747031958 | -5.578850875 |
| 1432327_at   | 0.039506923  | 3.917158401 | 0.332134021  | 0.747071557 | 0.747071557 | -5.578868045 |
| 1459599_at   | 0.025407089  | 3.346875367 | 0.332121332  | 0.747080836 | 0.747080836 | -5.578872069 |
| 1435091_at   | -0.025431274 | 8.532316203 | -0.332118404 | 0.747082978 | 0.747082978 | -5.578872997 |
| 1446832_at   | 0.030845132  | 3.201722149 | 0.332076967  | 0.747113279 | 0.747113279 | -5.578886133 |
| 1434089_at   | -0.026258109 | 8.851314219 | -0.332071161 | 0.747117525 | 0.747117525 | -5.578887974 |
| 1442191_at   | -0.036684089 | 4.094052327 | -0.33206522  | 0.747121869 | 0.747121869 | -5.578889857 |
| 1454111_at   | -0.038193946 | 4.563519506 | -0.33205379  | 0.747130228 | 0.747130228 | -5.57889348  |
| 1435552_at   | 0.022113853  | 7.988614505 | 0.332018719  | 0.747155874 | 0.747155874 | -5.578904596 |
| 1423342_at   | -0.037931364 | 9.790964546 | -0.331981615 | 0.747183008 | 0.747183008 | -5.578916356 |
| 1449056_at   | 0.02634233   | 8.257672811 | 0.331958103  | 0.747200203 | 0.747200203 | -5.578923807 |
| 1438634_x_at | 0.042626267  | 10.23255509 | 0.331938531  | 0.747214516 | 0.747214516 | -5.578930009 |
| 1455713_x_at | 0.025373942  | 10.95735987 | 0.331928964  | 0.747221512 | 0.747221512 | -5.57893304  |
| 1422828_at   | 0.035577959  | 4.616334667 | 0.331893615  | 0.747247364 | 0.747247364 | -5.578944241 |
| 1459770_at   | 0.035384293  | 4.021334374 | 0.331851552  | 0.747278125 | 0.747278125 | -5.578957567 |



|              |              |             |              |             |             |              |
|--------------|--------------|-------------|--------------|-------------|-------------|--------------|
| 1443100_at   | 0.031027903  | 4.783129294 | 0.33175827   | 0.747346346 | 0.747346346 | -5.578987113 |
| 1429736_at   | 0.02755531   | 5.271376507 | 0.33170584   | 0.747384692 | 0.747384692 | -5.579003717 |
| 1431764_at   | 0.028116281  | 3.319193455 | 0.331674062  | 0.747407933 | 0.747407933 | -5.579013779 |
| 1427933_at   | -0.025272236 | 7.400162687 | -0.33164953  | 0.747425876 | 0.747425876 | -5.579021546 |
| 1455418_at   | -0.026902976 | 7.100230713 | -0.331645243 | 0.747429011 | 0.747429011 | -5.579022903 |
| 1439961_x_at | -0.024233281 | 4.201964174 | -0.331535461 | 0.747509305 | 0.747509305 | -5.579057655 |
| 1451218_at   | 0.026689629  | 8.098288788 | 0.331525601  | 0.747516517 | 0.747516517 | -5.579060775 |
| 1452705_at   | -0.026723821 | 9.371059671 | -0.331520902 | 0.747519954 | 0.747519954 | -5.579062263 |
| 1439623_at   | 0.023235621  | 5.063396819 | 0.331495821  | 0.747538299 | 0.747538299 | -5.5790702   |
| 1431912_at   | -0.027607778 | 4.467577359 | -0.331467803 | 0.747558792 | 0.747558792 | -5.579079066 |
| 1450504_a_at | -0.024710496 | 7.708688476 | -0.331452608 | 0.747569906 | 0.747569906 | -5.579083874 |
| 1421512_at   | 0.042859567  | 5.258558178 | 0.331430467  | 0.747586101 | 0.747586101 | -5.57909088  |
| 1417098_s_at | 0.021792729  | 6.977882623 | 0.331391157  | 0.747614854 | 0.747614854 | -5.579103317 |
| 1454508_at   | 0.022195943  | 3.16867029  | 0.331389567  | 0.747616017 | 0.747616017 | -5.57910382  |
| 1418104_at   | 0.023311617  | 3.728379269 | 0.331370099  | 0.747630257 | 0.747630257 | -5.579109979 |
| 1447447_s_at | 0.0249017    | 10.41408701 | 0.331351657  | 0.747643746 | 0.747643746 | -5.579115813 |
| 1421472_at   | 0.028116216  | 4.491647558 | 0.331267476  | 0.747705323 | 0.747705323 | -5.579142438 |
| 1435519_at   | 0.019580253  | 11.59399693 | 0.331218088  | 0.74774145  | 0.74774145  | -5.579158056 |
| 1436133_at   | -0.03278315  | 6.595598463 | -0.331171959 | 0.747775194 | 0.747775194 | -5.579172641 |
| 1419275_at   | 0.022030824  | 9.98044683  | 0.331121219  | 0.747812311 | 0.747812311 | -5.579188682 |
| 1449818_at   | 0.031376567  | 5.530039245 | 0.331043599  | 0.747869093 | 0.747869093 | -5.579213216 |
| 1458433_at   | -0.02264495  | 5.260845922 | -0.331010162 | 0.747893553 | 0.747893553 | -5.579223782 |
| 1429695_at   | -0.031516604 | 4.629883547 | -0.331005372 | 0.747897057 | 0.747897057 | -5.579225296 |
| 1419455_at   | -0.031583018 | 8.029788053 | -0.330984283 | 0.747912485 | 0.747912485 | -5.57923196  |
| 1428295_at   | -0.084649049 | 3.71735058  | -0.330917078 | 0.74796165  | 0.74796165  | -5.579253194 |
| 1435805_at   | 0.034303745  | 7.385149885 | 0.330854124  | 0.748007707 | 0.748007707 | -5.579273081 |
| 1432854_at   | -0.030577672 | 4.079322507 | -0.330835975 | 0.748020984 | 0.748020984 | -5.579278813 |
| 1423832_at   | -0.024201078 | 4.934566439 | -0.330826162 | 0.748028164 | 0.748028164 | -5.579281912 |
| 1442688_at   | 0.022739722  | 3.346717356 | 0.330819357  | 0.748033142 | 0.748033142 | -5.579284062 |
| 1459524_at   | 0.027786694  | 4.944335151 | 0.330741794  | 0.748089888 | 0.748089888 | -5.579308556 |
| 1452432_at   | -0.039347538 | 6.890916636 | -0.330735832 | 0.748094251 | 0.748094251 | -5.579310438 |
| 1434922_at   | -0.040454533 | 7.225134007 | -0.330723406 | 0.748103342 | 0.748103342 | -5.579314362 |
| 1459351_at   | 0.030821509  | 3.754567919 | 0.330682172  | 0.748133509 | 0.748133509 | -5.57932738  |
| 1415778_at   | -0.022136931 | 12.32085042 | -0.330642253 | 0.748162716 | 0.748162716 | -5.579339982 |
| 1433267_at   | -0.024454232 | 6.894973149 | -0.33058483  | 0.74820473  | 0.74820473  | -5.579358107 |
| 1456528_x_at | -0.031387195 | 8.366612639 | -0.330573614 | 0.748212937 | 0.748212937 | -5.579361647 |
| 1424564_at   | 0.02527444   | 8.604733577 | 0.330543593  | 0.748234903 | 0.748234903 | -5.579371121 |
| 1453667_at   | 0.020448593  | 3.328848332 | 0.330539287  | 0.748238053 | 0.748238053 | -5.57937248  |
| 1421919_a_at | 0.03578834   | 3.979145883 | 0.330451155  | 0.748302538 | 0.748302538 | -5.579400288 |
| 1423699_at   | 0.030743454  | 7.883224394 | 0.330448057  | 0.748304805 | 0.748304805 | -5.579401266 |
| 1425398_at   | 0.039805828  | 4.622278282 | 0.330440392  | 0.748310413 | 0.748310413 | -5.579403684 |
| 1416833_at   | 0.025151349  | 3.952495317 | 0.330438411  | 0.748311863 | 0.748311863 | -5.579404309 |
| 1457096_at   | -0.02650198  | 4.269359331 | -0.330410479 | 0.748332301 | 0.748332301 | -5.57941312  |
| 1452955_at   | 0.047915819  | 5.514030133 | 0.330390898  | 0.748346629 | 0.748346629 | -5.579419297 |
| 1451170_s_at | -0.024049444 | 9.163478274 | -0.330389917 | 0.748347346 | 0.748347346 | -5.579419606 |
| 1446546_at   | -0.045044967 | 5.249055607 | -0.330352775 | 0.748374524 | 0.748374524 | -5.579431322 |
| 1441225_at   | 0.044150442  | 5.505760431 | 0.33033153   | 0.74839007  | 0.74839007  | -5.579438022 |
| 1425942_a_at | -0.021436556 | 7.233756926 | -0.330188056 | 0.748495057 | 0.748495057 | -5.579483261 |
| 1418938_at   | 0.029921523  | 4.262897358 | 0.330187055  | 0.748495789 | 0.748495789 | -5.579483577 |
| 1449227_at   | 0.037608467  | 5.781705737 | 0.330172856  | 0.74850618  | 0.74850618  | -5.579488053 |
| 1455327_at   | -0.025694063 | 6.076571855 | -0.330111426 | 0.748551134 | 0.748551134 | -5.579507416 |
| 1456508_at   | -0.029218944 | 3.292405187 | -0.330094642 | 0.748563416 | 0.748563416 | -5.579512705 |
| 1431951_a_at | 0.025825396  | 8.522826913 | 0.330082768  | 0.748572106 | 0.748572106 | -5.579516447 |

|              |              |             |              |             |             |              |
|--------------|--------------|-------------|--------------|-------------|-------------|--------------|
| 1439231_at   | 0.132904798  | 6.570484754 | 0.330034653  | 0.748607316 | 0.748607316 | -5.57953161  |
| 1439726_at   | 0.028762509  | 7.432344377 | 0.329953472  | 0.748666726 | 0.748666726 | -5.579557187 |
| 1440282_at   | 0.028357878  | 3.696448708 | 0.3299469    | 0.748671536 | 0.748671536 | -5.579559257 |
| 1456252_x_at | 0.0327138    | 3.431386947 | 0.329873864  | 0.748724987 | 0.748724987 | -5.579582262 |
| 1422130_at   | -0.037576015 | 5.440600305 | -0.32986752  | 0.74872963  | 0.74872963  | -5.579584261 |
| 1416228_at   | 0.023445454  | 9.755523706 | 0.329837287  | 0.748751756 | 0.748751756 | -5.579593782 |
| 1442725_at   | 0.09109689   | 5.544914663 | 0.329828095  | 0.748758483 | 0.748758483 | -5.579596676 |
| 1428211_at   | -0.029841162 | 6.27103034  | -0.329790001 | 0.748786363 | 0.748786363 | -5.579608672 |
| 1422301_at   | -0.020438464 | 7.568667364 | -0.329773795 | 0.748798224 | 0.748798224 | -5.579613775 |
| 1454940_at   | -0.036445981 | 4.641840867 | -0.329712986 | 0.748842729 | 0.748842729 | -5.579632919 |
| 1426331_a_at | 0.025714278  | 6.270906505 | 0.329684645  | 0.748863472 | 0.748863472 | -5.579641841 |
| 1429180_at   | 0.028430116  | 7.262413771 | 0.329684087  | 0.748863881 | 0.748863881 | -5.579642017 |
| 1424618_at   | 0.025730366  | 4.516952007 | 0.329650021  | 0.748888814 | 0.748888814 | -5.579652739 |
| 1428348_at   | 0.022681161  | 8.593396762 | 0.329614031  | 0.748915156 | 0.748915156 | -5.579664066 |
| 1423491_at   | 0.021459089  | 6.756250213 | 0.329568219  | 0.748948687 | 0.748948687 | -5.579678483 |
| 1460290_at   | 0.028228367  | 6.992723412 | 0.329566072  | 0.748950259 | 0.748950259 | -5.579679158 |
| 1458212_at   | 0.035090514  | 4.519866561 | 0.329558804  | 0.748955578 | 0.748955578 | -5.579681445 |
| 1451837_at   | 0.03081515   | 4.749897146 | 0.329487747  | 0.749007588 | 0.749007588 | -5.579703802 |
| 1431952_at   | 0.02350927   | 3.233398167 | 0.329467582  | 0.749022348 | 0.749022348 | -5.579710145 |
| 1455964_at   | -0.023349006 | 6.935001691 | -0.329423698 | 0.74905447  | 0.74905447  | -5.579723949 |
| 1443505_at   | 0.021674285  | 3.319714833 | 0.329400999  | 0.749071084 | 0.749071084 | -5.579731088 |
| 1438729_at   | 0.030401073  | 3.329070293 | 0.329387364  | 0.749081065 | 0.749081065 | -5.579735377 |
| 1420260_at   | 0.02671914   | 5.941949948 | 0.329381978  | 0.749085007 | 0.749085007 | -5.579737071 |
| 1429075_a_at | -0.027596689 | 5.257552496 | -0.329371668 | 0.749092554 | 0.749092554 | -5.579740313 |
| 1428898_at   | -0.036270309 | 6.602821615 | -0.329368538 | 0.749094845 | 0.749094845 | -5.579741297 |
| 1430151_at   | -0.033106005 | 8.228803462 | -0.329304879 | 0.749141444 | 0.749141444 | -5.579761315 |
| 1435251_at   | 0.028687732  | 8.409911293 | 0.329273351  | 0.749164522 | 0.749164522 | -5.579771228 |
| 1450713_at   | -0.031564147 | 5.692286513 | -0.329244569 | 0.749185591 | 0.749185591 | -5.579780276 |
| 1447706_at   | 0.06674976   | 6.569991036 | 0.329228269  | 0.749197523 | 0.749197523 | -5.5797854   |
| 1449974_at   | 0.034801612  | 5.438383734 | 0.329181869  | 0.749231489 | 0.749231489 | -5.579799985 |
| 1433339_at   | 0.033585228  | 5.091999152 | 0.329109963  | 0.749284128 | 0.749284128 | -5.579822584 |
| 1425270_at   | 0.021257609  | 9.187251228 | 0.328991549  | 0.749370815 | 0.749370815 | -5.579859787 |
| 1441531_at   | -0.048305512 | 6.674700403 | -0.328959966 | 0.749393937 | 0.749393937 | -5.579869708 |
| 1448575_at   | -0.037128754 | 3.935001687 | -0.328927384 | 0.74941779  | 0.74941779  | -5.579879942 |
| 1457918_at   | 0.031856821  | 4.595879328 | 0.328859506  | 0.749467485 | 0.749467485 | -5.579901258 |
| 1425797_a_at | 0.023938917  | 3.958325471 | 0.328829879  | 0.749489176 | 0.749489176 | -5.579910561 |
| 1443743_at   | 0.031677965  | 3.042879626 | 0.328826977  | 0.7494913   | 0.7494913   | -5.579911472 |
| 1459028_at   | -0.037184592 | 4.371340932 | -0.328785909 | 0.749521367 | 0.749521367 | -5.579924366 |
| 1445284_at   | 0.022642399  | 3.810426796 | 0.32874982   | 0.74954779  | 0.74954779  | -5.579935695 |
| 1440071_at   | 0.030578074  | 4.151432177 | 0.328675231  | 0.749602401 | 0.749602401 | -5.579959106 |
| 1460558_at   | 0.027499321  | 8.394501256 | 0.328635963  | 0.749631152 | 0.749631152 | -5.579971429 |
| 1419342_at   | 0.037745838  | 4.769279187 | 0.328617716  | 0.749644512 | 0.749644512 | -5.579977155 |
| 1446459_at   | -0.020204976 | 3.320617551 | -0.32859637  | 0.749660142 | 0.749660142 | -5.579983853 |
| 1437859_x_at | 0.022345523  | 11.41468434 | 0.328522736  | 0.749714056 | 0.749714056 | -5.580006954 |
| 1433914_at   | 0.046740056  | 7.575837884 | 0.328490308  | 0.749737801 | 0.749737801 | -5.580017126 |
| 1457326_at   | 0.022096138  | 3.852984715 | 0.328469541  | 0.749753007 | 0.749753007 | -5.58002364  |
| 1449552_at   | -0.092461646 | 7.709914683 | -0.328446796 | 0.749769661 | 0.749769661 | -5.580030774 |
| 1415917_at   | 0.025593938  | 8.53517527  | 0.328422668  | 0.749787328 | 0.749787328 | -5.58003834  |
| 1435076_at   | 0.019974613  | 8.181465886 | 0.328368078  | 0.749827302 | 0.749827302 | -5.580055459 |
| 1441027_at   | 0.03820267   | 4.711024252 | 0.328353228  | 0.749838175 | 0.749838175 | -5.580060115 |
| 1422741_a_at | 0.050129491  | 6.957789341 | 0.328266728  | 0.749901517 | 0.749901517 | -5.580087232 |
| 1456208_at   | -0.040954419 | 4.04005039  | -0.328261258 | 0.749905522 | 0.749905522 | -5.580088947 |
| 1455776_x_at | 0.02376289   | 8.269128147 | 0.328228479  | 0.749929526 | 0.749929526 | -5.580099221 |

|              |              |             |              |             |             |              |
|--------------|--------------|-------------|--------------|-------------|-------------|--------------|
| 1436784_x_at | -0.023408199 | 8.386352088 | -0.328165521 | 0.749975629 | 0.749975629 | -5.580118952 |
| 1430166_at   | 0.03084368   | 4.499593487 | 0.328164686  | 0.749976241 | 0.749976241 | -5.580119213 |
| 1451491_at   | -0.027634101 | 6.25979309  | -0.328160825 | 0.749979068 | 0.749979068 | -5.580120423 |
| 1426917_s_at | -0.034648443 | 5.669429401 | -0.328134458 | 0.749998377 | 0.749998377 | -5.580128685 |
| 1442818_at   | -0.028702805 | 3.814625596 | -0.328112626 | 0.750014365 | 0.750014365 | -5.580135526 |
| 1422746_s_at | -0.034386692 | 6.945758742 | -0.328080421 | 0.750037949 | 0.750037949 | -5.580145615 |
| 1419642_at   | 0.027798     | 10.15731482 | 0.328044839  | 0.750064007 | 0.750064007 | -5.580156762 |
| 1441705_at   | -0.02766304  | 4.527840551 | -0.327992224 | 0.75010254  | 0.75010254  | -5.580173243 |
| 1436615_a_at | -0.023216755 | 3.120277231 | -0.327980755 | 0.750110939 | 0.750110939 | -5.580176835 |
| 1438924_x_at | 0.028457994  | 4.612049935 | 0.327961926  | 0.750124728 | 0.750124728 | -5.580182731 |
| 1431599_at   | 0.025715617  | 4.767091237 | 0.327934031  | 0.750145158 | 0.750145158 | -5.580191467 |
| 1453570_x_at | 0.023797972  | 7.830372684 | 0.327919982  | 0.750155446 | 0.750155446 | -5.580195866 |
| 1436076_at   | 0.021700576  | 3.645219924 | 0.327919441  | 0.750155843 | 0.750155843 | -5.580196036 |
| 1419730_at   | -0.022635092 | 7.904984781 | -0.327908394 | 0.750163933 | 0.750163933 | -5.580199495 |
| 1416219_at   | -0.022730497 | 13.51858872 | -0.327905633 | 0.750165955 | 0.750165955 | -5.580200359 |
| 1440678_at   | -0.023717778 | 6.390638639 | -0.327894712 | 0.750173953 | 0.750173953 | -5.580203779 |
| 1418864_at   | 0.031901819  | 3.670366766 | 0.327838748  | 0.75021494  | 0.75021494  | -5.5802213   |
| 1454445_at   | 0.02142544   | 3.996494801 | 0.327814309  | 0.75023284  | 0.75023284  | -5.580228951 |
| 1457497_at   | -0.036535313 | 3.769086472 | -0.327783939 | 0.750255082 | 0.750255082 | -5.580238457 |
| 1432059_x_at | 0.036180154  | 8.058954836 | 0.327750322  | 0.750279704 | 0.750279704 | -5.580248979 |
| 1451752_at   | -0.024254241 | 4.920884845 | -0.327750052 | 0.750279902 | 0.750279902 | -5.580249064 |
| 1460478_at   | -0.026641197 | 5.119421434 | -0.327724107 | 0.750298904 | 0.750298904 | -5.580257184 |
| 1448495_at   | -0.021131401 | 8.428871797 | -0.327658741 | 0.75034678  | 0.75034678  | -5.580277638 |
| 1424927_at   | -0.041719263 | 5.899611638 | -0.327611182 | 0.750381615 | 0.750381615 | -5.580292518 |
| 1452124_at   | 0.028213246  | 9.238466921 | 0.32758366   | 0.750401773 | 0.750401773 | -5.580301128 |
| 1451560_at   | -0.031011955 | 6.217153455 | -0.327554031 | 0.750423475 | 0.750423475 | -5.580310396 |
| 1442781_at   | 0.024112537  | 5.052059645 | 0.327526223  | 0.750443844 | 0.750443844 | -5.580319094 |
| 1436104_a_at | 0.02422974   | 4.894790346 | 0.327520195  | 0.750448259 | 0.750448259 | -5.580320979 |
| 1437122_at   | 0.023761823  | 7.418652719 | 0.327470208  | 0.750484874 | 0.750484874 | -5.580336612 |
| 1423379_at   | -0.045866719 | 7.551408712 | -0.327455221 | 0.750495851 | 0.750495851 | -5.580341298 |
| 1440553_at   | 0.049352022  | 6.979289262 | 0.32743742   | 0.75050889  | 0.75050889  | -5.580346865 |
| 1419185_a_at | 0.045592955  | 5.093706363 | 0.327419443  | 0.750522058 | 0.750522058 | -5.580352486 |
| 1420827_a_at | 0.043714519  | 9.21493455  | 0.327402627  | 0.750534376 | 0.750534376 | -5.580357743 |
| 1454715_at   | -0.030964823 | 4.736749231 | -0.327380884 | 0.750550303 | 0.750550303 | -5.580364541 |
| 1421576_at   | 0.02291336   | 3.8849435   | 0.327355187  | 0.750569126 | 0.750569126 | -5.580372575 |
| 1460108_at   | 0.030893244  | 4.646887831 | 0.327306821  | 0.750604556 | 0.750604556 | -5.580387693 |
| 1458961_at   | 0.036201115  | 3.837092434 | 0.32730514   | 0.750605787 | 0.750605787 | -5.580388219 |
| 1448725_at   | 0.020511537  | 8.769197074 | 0.327250117  | 0.750646093 | 0.750646093 | -5.580405415 |
| 1441446_at   | 0.032871086  | 3.669334658 | 0.327230891  | 0.750660177 | 0.750660177 | -5.580411423 |
| 1447332_at   | -0.023269114 | 3.524087056 | -0.327213957 | 0.750672582 | 0.750672582 | -5.580416715 |
| 1425093_at   | -0.037257123 | 4.855616336 | -0.327203378 | 0.750680332 | 0.750680332 | -5.580420021 |
| 1418421_at   | 0.025546161  | 7.302553562 | 0.327137914  | 0.750728289 | 0.750728289 | -5.580440474 |
| 1460338_a_at | 0.020971229  | 8.461629884 | 0.327124876  | 0.75073784  | 0.75073784  | -5.580444547 |
| 1449014_at   | 0.032191945  | 7.811082293 | 0.327094472  | 0.750760114 | 0.750760114 | -5.580454045 |
| 1458300_at   | -0.025634429 | 3.657883703 | -0.32708206  | 0.750769207 | 0.750769207 | -5.580457922 |
| 1424813_at   | -0.023463205 | 5.363971163 | -0.327059357 | 0.750785839 | 0.750785839 | -5.580465013 |
| 1450901_a_at | -0.024549031 | 10.00618147 | -0.327059106 | 0.750786022 | 0.750786022 | -5.580465091 |
| 1417616_at   | 0.042993385  | 5.271325692 | 0.327038092  | 0.750801417 | 0.750801417 | -5.580471654 |
| 1426978_at   | 0.028416707  | 6.374016403 | 0.327013124  | 0.750819709 | 0.750819709 | -5.580479452 |
| 1416664_at   | -0.021407947 | 10.153468   | -0.327008075 | 0.750823408 | 0.750823408 | -5.580481029 |
| 1449345_at   | 0.033067144  | 8.854526063 | 0.326982556  | 0.750842103 | 0.750842103 | -5.580488998 |
| 1442636_at   | 0.02435216   | 3.933344017 | 0.326976133  | 0.750846809 | 0.750846809 | -5.580491004 |
| 1429616_at   | 0.037393526  | 5.658311417 | 0.326937001  | 0.750875477 | 0.750875477 | -5.580503222 |

|              |              |             |              |             |             |              |
|--------------|--------------|-------------|--------------|-------------|-------------|--------------|
| 1453090_x_at | -0.021814651 | 3.264521908 | -0.326850695 | 0.750938709 | 0.750938709 | -5.580530165 |
| 1426710_at   | -0.028565937 | 10.73411411 | -0.326603484 | 0.751119836 | 0.751119836 | -5.580607301 |
| 1421083_x_at | -0.024883854 | 10.66949671 | -0.326596496 | 0.751124956 | 0.751124956 | -5.58060948  |
| 1425497_a_at | -0.019568542 | 9.488729852 | -0.326582184 | 0.751135442 | 0.751135442 | -5.580613944 |
| 1427120_at   | 0.023909231  | 9.684230086 | 0.326575101  | 0.751140632 | 0.751140632 | -5.580616153 |
| 1425210_s_at | -0.028583018 | 6.597616552 | -0.326562882 | 0.751149586 | 0.751149586 | -5.580619964 |
| 1417647_at   | 0.032136686  | 9.737435176 | 0.326546421  | 0.751161647 | 0.751161647 | -5.580625098 |
| 1455046_a_at | -0.043067035 | 8.612508774 | -0.326429311 | 0.751247459 | 0.751247459 | -5.580661613 |
| 1456940_at   | 0.024119978  | 3.464046385 | 0.326399627  | 0.75126921  | 0.75126921  | -5.580670866 |
| 1438214_at   | -0.035876475 | 9.366505198 | -0.326368375 | 0.751292111 | 0.751292111 | -5.580680608 |
| 1434104_at   | -0.027353011 | 8.853865934 | -0.326322217 | 0.751325934 | 0.751325934 | -5.580694994 |
| 1459186_at   | -0.030635459 | 3.720727943 | -0.326260877 | 0.751370884 | 0.751370884 | -5.580714108 |
| 1437607_at   | 0.034486792  | 3.36941721  | 0.326228524  | 0.751394593 | 0.751394593 | -5.580724189 |
| 1424520_at   | -0.020121644 | 7.137648053 | -0.326212348 | 0.751406446 | 0.751406446 | -5.580729228 |
| 1454375_at   | -0.041305541 | 5.776927979 | -0.326160656 | 0.751444327 | 0.751444327 | -5.580745331 |
| 1455957_x_at | 0.035983354  | 3.287875078 | 0.326138665  | 0.751460443 | 0.751460443 | -5.580752181 |
| 1446553_at   | -0.022931771 | 3.920216899 | -0.326110879 | 0.751480806 | 0.751480806 | -5.580760836 |
| 1433809_at   | -0.025127261 | 6.828686522 | -0.326097635 | 0.751490512 | 0.751490512 | -5.580764961 |
| 1444793_at   | -0.030225486 | 3.969266725 | -0.325999453 | 0.751562465 | 0.751562465 | -5.580795534 |
| 1429432_at   | -0.029022345 | 5.180140064 | -0.325998492 | 0.75156317  | 0.75156317  | -5.580795833 |
| 1423279_at   | 0.026698845  | 4.376040304 | 0.325994614  | 0.751566012 | 0.751566012 | -5.58079704  |
| 1447482_at   | -0.027431376 | 5.42236085  | -0.325929761 | 0.751613542 | 0.751613542 | -5.58081723  |
| 1452127_a_at | 0.032700794  | 9.119796949 | 0.325921674  | 0.751619468 | 0.751619468 | -5.580819747 |
| 1443846_x_at | -0.022587605 | 7.71948217  | -0.32582362  | 0.751691333 | 0.751691333 | -5.580850264 |
| 1426881_at   | -0.025252699 | 8.203384357 | -0.325772674 | 0.751728672 | 0.751728672 | -5.580866117 |
| 1444562_at   | -0.032947544 | 7.087625261 | -0.325761665 | 0.751736741 | 0.751736741 | -5.580869542 |
| 1419930_at   | 0.031452374  | 3.514409588 | 0.325735254  | 0.751756099 | 0.751756099 | -5.580877759 |
| 1423558_at   | 0.023692298  | 6.646883872 | 0.325728713  | 0.751760893 | 0.751760893 | -5.580879794 |
| 1423880_at   | 0.021104077  | 9.382318321 | 0.325719409  | 0.751767712 | 0.751767712 | -5.580882688 |
| 1446093_at   | -0.022567016 | 5.159001785 | -0.325709374 | 0.751775067 | 0.751775067 | -5.58088581  |
| 1417989_at   | 0.020973468  | 4.817488592 | 0.325652736  | 0.75181658  | 0.75181658  | -5.580903427 |
| 1449370_at   | -0.033059561 | 8.329764757 | -0.325644476 | 0.751822635 | 0.751822635 | -5.580905996 |
| 1440027_at   | -0.032619824 | 6.715069525 | -0.325608117 | 0.751849284 | 0.751849284 | -5.580917304 |
| 1423979_a_at | -0.031428027 | 5.487200529 | -0.325547843 | 0.751893464 | 0.751893464 | -5.580936046 |
| 1421313_s_at | -0.029462807 | 8.254030254 | -0.325546675 | 0.75189432  | 0.75189432  | -5.580936409 |
| 1454801_at   | 0.027886647  | 7.412491151 | 0.325527522  | 0.75190836  | 0.75190836  | -5.580942364 |
| 1448133_at   | 0.030897262  | 7.612206349 | 0.325519724  | 0.751914076 | 0.751914076 | -5.580944789 |
| 1438838_at   | 0.057890123  | 7.019301019 | 0.325505106  | 0.75192479  | 0.75192479  | -5.580949333 |
| 1428687_at   | -0.030764666 | 7.647950942 | -0.325496774 | 0.751930898 | 0.751930898 | -5.580951924 |
| 1416659_at   | -0.020260135 | 10.62531841 | -0.325452424 | 0.751963406 | 0.751963406 | -5.58096571  |
| 1420661_a_at | -0.026801731 | 5.454707227 | -0.325445999 | 0.751968116 | 0.751968116 | -5.580967707 |
| 1451144_at   | 0.023112491  | 10.0814974  | 0.325426941  | 0.751982086 | 0.751982086 | -5.580973631 |
| 1430775_at   | -0.028967033 | 3.907943354 | -0.325424494 | 0.75198388  | 0.75198388  | -5.580974392 |
| 1422496_at   | 0.038687259  | 4.356079125 | 0.325408876  | 0.751995328 | 0.751995328 | -5.580979245 |
| 1426377_at   | -0.025484385 | 8.162624375 | -0.3254048   | 0.751998316 | 0.751998316 | -5.580980512 |
| 1453795_at   | -0.025755522 | 7.857830229 | -0.325400189 | 0.752001696 | 0.752001696 | -5.580981945 |
| 1451121_a_at | 0.028678125  | 8.862800697 | 0.325368159  | 0.752025175 | 0.752025175 | -5.580991899 |
| 1430004_s_at | -0.026013248 | 3.898982347 | -0.325330294 | 0.752052932 | 0.752052932 | -5.581003666 |
| 1425166_at   | -0.024328207 | 5.513309291 | -0.325312679 | 0.752065844 | 0.752065844 | -5.581009139 |
| 1422563_at   | -0.029694532 | 8.961079798 | -0.325300394 | 0.75207485  | 0.75207485  | -5.581012956 |
| 1419602_at   | -0.02981094  | 3.321579102 | -0.325298097 | 0.752076534 | 0.752076534 | -5.58101367  |
| 1442430_at   | 0.035431527  | 3.984150259 | 0.325271392  | 0.75209611  | 0.75209611  | -5.581021966 |
| 1442606_at   | -0.043690498 | 5.163075473 | -0.325229449 | 0.752126857 | 0.752126857 | -5.581034996 |

|              |              |             |              |             |             |              |
|--------------|--------------|-------------|--------------|-------------|-------------|--------------|
| 1424270_at   | 0.042761734  | 6.275525985 | 0.325199326  | 0.752148939 | 0.752148939 | -5.581044353 |
| 1424514_at   | -0.028734837 | 8.992037317 | -0.325196152 | 0.752151267 | 0.752151267 | -5.581045339 |
| 1437137_at   | -0.022704244 | 7.753929638 | -0.325153339 | 0.752182652 | 0.752182652 | -5.581058635 |
| 1422612_at   | 0.023840994  | 8.637771626 | 0.325140067  | 0.752192382 | 0.752192382 | -5.581062757 |
| 1451676_at   | 0.022049937  | 9.377861338 | 0.32512628   | 0.752202489 | 0.752202489 | -5.581067038 |
| 1433462_a_at | -0.059503893 | 5.974126164 | -0.325102558 | 0.75221988  | 0.75221988  | -5.581074405 |
| 1439337_at   | 0.023198028  | 3.8037488   | 0.325085168  | 0.752232628 | 0.752232628 | -5.581079804 |
| 1454858_x_at | 0.028795509  | 8.433298197 | 0.325070602  | 0.752243307 | 0.752243307 | -5.581084327 |
| 1456757_at   | 0.042588326  | 4.047025183 | 0.325069364  | 0.752244214 | 0.752244214 | -5.581084711 |
| 1453705_at   | 0.022636877  | 4.068776923 | 0.325055359  | 0.752254482 | 0.752254482 | -5.581089059 |
| 1437769_at   | -0.03576964  | 6.299067603 | -0.325051458 | 0.752257342 | 0.752257342 | -5.581090271 |
| 1439844_at   | 0.024409633  | 5.691851942 | 0.325043575  | 0.752263121 | 0.752263121 | -5.581092718 |
| 1446122_at   | 0.030640259  | 4.719795162 | 0.325018819  | 0.75228127  | 0.75228127  | -5.581100403 |
| 1429038_at   | 0.020924275  | 8.75908156  | 0.32499462   | 0.752299011 | 0.752299011 | -5.581107915 |
| 1441915_s_at | -0.034594377 | 6.059744853 | -0.324936896 | 0.752341331 | 0.752341331 | -5.581125832 |
| 1447381_at   | 0.037561261  | 5.451321558 | 0.324882974  | 0.752380864 | 0.752380864 | -5.581142566 |
| 1448169_at   | -0.049917415 | 9.550022503 | -0.324853721 | 0.752402312 | 0.752402312 | -5.581151643 |
| 1438018_at   | 0.038485742  | 8.13890766  | 0.324847456  | 0.752406905 | 0.752406905 | -5.581153586 |
| 1452172_at   | -0.025790461 | 7.804798984 | -0.324845693 | 0.752408198 | 0.752408198 | -5.581154134 |
| 1450094_at   | -0.026834672 | 4.548089549 | -0.32483834  | 0.752413589 | 0.752413589 | -5.581156415 |
| 1433234_at   | -0.037463886 | 4.260875975 | -0.324824067 | 0.752424053 | 0.752424053 | -5.581160843 |
| 1443336_at   | 0.055095989  | 4.248654294 | 0.324789534  | 0.752449372 | 0.752449372 | -5.581171557 |
| 1418382_at   | 0.040593094  | 8.870875376 | 0.324737291  | 0.752487676 | 0.752487676 | -5.581187762 |
| 1438065_at   | 0.024124944  | 7.511361864 | 0.32472661   | 0.752495508 | 0.752495508 | -5.581191075 |
| 1446856_at   | 0.028311911  | 4.73228612  | 0.324684568  | 0.752526333 | 0.752526333 | -5.581204114 |
| 1424440_at   | -0.020999494 | 8.727532189 | -0.324606379 | 0.752583663 | 0.752583663 | -5.581228359 |
| 1423263_at   | 0.020288044  | 12.29083481 | 0.324587562  | 0.752597461 | 0.752597461 | -5.581234194 |
| 1440555_at   | 0.031125009  | 4.469587245 | 0.324543061  | 0.752630091 | 0.752630091 | -5.581247989 |
| 1459773_x_at | -0.028533986 | 9.158200234 | -0.324492523 | 0.752667148 | 0.752667148 | -5.581263654 |
| 1446377_at   | -0.035888237 | 4.50002089  | -0.324463388 | 0.752688512 | 0.752688512 | -5.581272684 |
| 1439710_at   | -0.030025217 | 5.273974531 | -0.324422512 | 0.752718485 | 0.752718485 | -5.581285352 |
| 1444718_at   | 0.025507626  | 3.693746097 | 0.324407691  | 0.752729354 | 0.752729354 | -5.581289944 |
| 1431508_at   | 0.034725646  | 5.21628257  | 0.324406035  | 0.752730568 | 0.752730568 | -5.581290457 |
| 1432627_at   | -0.026606637 | 4.297546022 | -0.324353026 | 0.752769439 | 0.752769439 | -5.581306882 |
| 1416320_at   | -0.024452532 | 8.075050541 | -0.32432567  | 0.7527895   | 0.7527895   | -5.581315357 |
| 1416638_at   | 0.044472255  | 7.935723793 | 0.324272473  | 0.75282851  | 0.75282851  | -5.581331835 |
| 1455828_at   | -0.03091872  | 5.823944536 | -0.324251452 | 0.752843925 | 0.752843925 | -5.581338346 |
| 1443975_at   | -0.033476931 | 4.501637088 | -0.324221842 | 0.752865639 | 0.752865639 | -5.581347516 |
| 1448625_at   | -0.021860849 | 9.067073377 | -0.324161815 | 0.752909659 | 0.752909659 | -5.581366104 |
| 1441054_at   | 0.025638243  | 3.504024293 | 0.324160298  | 0.752910772 | 0.752910772 | -5.581366574 |
| 1445475_at   | 0.033711075  | 4.599467599 | 0.324149134  | 0.752918959 | 0.752918959 | -5.581370031 |
| 1460417_at   | -0.029430873 | 3.439636062 | -0.324083641 | 0.752966989 | 0.752966989 | -5.581390307 |
| 1445570_at   | -0.027611378 | 6.415198695 | -0.324007063 | 0.75302315  | 0.75302315  | -5.58141401  |
| 1451256_at   | 0.027039859  | 7.405375872 | 0.323947868  | 0.753066563 | 0.753066563 | -5.581432328 |
| 1424399_at   | 0.024275977  | 8.112705952 | 0.323931316  | 0.753078703 | 0.753078703 | -5.58143745  |
| 1418265_s_at | 0.021314066  | 5.295649142 | 0.323914952  | 0.753090704 | 0.753090704 | -5.581442514 |
| 1458587_at   | -0.030736369 | 5.6129653   | -0.323883847 | 0.753113518 | 0.753113518 | -5.581452137 |
| 1439689_at   | 0.037774262  | 4.868678983 | 0.323872032  | 0.753122182 | 0.753122182 | -5.581455792 |
| 1425082_s_at | -0.02532176  | 9.760738154 | -0.323858523 | 0.753132091 | 0.753132091 | -5.581459972 |
| 1430778_a_at | 0.021794373  | 7.511375433 | 0.323824348  | 0.753157156 | 0.753157156 | -5.581470543 |
| 1454980_at   | 0.02882452   | 8.241107951 | 0.323767665  | 0.753198729 | 0.753198729 | -5.581488075 |
| 1460402_at   | 0.026032717  | 8.976966615 | 0.323752521  | 0.753209837 | 0.753209837 | -5.581492758 |
| 1423225_at   | -0.022373272 | 9.685181202 | -0.323721249 | 0.753232774 | 0.753232774 | -5.581502429 |

|              |              |             |              |             |             |              |
|--------------|--------------|-------------|--------------|-------------|-------------|--------------|
| 1435379_at   | -0.024816906 | 7.761038125 | -0.323658726 | 0.753278633 | 0.753278633 | -5.581521761 |
| 1448073_at   | 0.033479868  | 3.688508066 | 0.323657446  | 0.753279571 | 0.753279571 | -5.581522156 |
| 1419195_at   | -0.022752299 | 4.70451572  | -0.323656904 | 0.753279969 | 0.753279969 | -5.581522324 |
| 1430798_x_at | 0.024861013  | 7.155201279 | 0.323647588  | 0.753286803 | 0.753286803 | -5.581525204 |
| 1431765_a_at | -0.019938174 | 13.83356942 | -0.323619475 | 0.753307423 | 0.753307423 | -5.581533895 |
| 1420312_s_at | -0.023285971 | 3.513581236 | -0.323603718 | 0.753318981 | 0.753318981 | -5.581538766 |
| 1429457_at   | 0.033046554  | 4.835579582 | 0.323579045  | 0.753337079 | 0.753337079 | -5.581546393 |
| 1418123_at   | 0.026041127  | 9.060866158 | 0.323539801  | 0.753365864 | 0.753365864 | -5.581558522 |
| 1445227_at   | -0.03259724  | 4.453021293 | -0.323400885 | 0.753467763 | 0.753467763 | -5.581601446 |
| 1451761_at   | 0.025679436  | 3.621265062 | 0.323397534  | 0.753470221 | 0.753470221 | -5.581602481 |
| 1431438_at   | 0.027531439  | 4.125159625 | 0.323314381  | 0.753531219 | 0.753531219 | -5.581628166 |
| 1442012_at   | 0.024228759  | 4.28632758  | 0.323295692  | 0.753544929 | 0.753544929 | -5.581633937 |
| 1457394_at   | -0.023841646 | 4.096602048 | -0.323287555 | 0.753550898 | 0.753550898 | -5.58163645  |
| 1427847_at   | -0.026962188 | 3.927284156 | -0.323272809 | 0.753561715 | 0.753561715 | -5.581641004 |
| 1448509_at   | 0.026013259  | 7.451664447 | 0.323269273  | 0.753564309 | 0.753564309 | -5.581642096 |
| 1427611_at   | -0.032871415 | 5.171170621 | -0.323247798 | 0.753580063 | 0.753580063 | -5.581648727 |
| 1432799_at   | 0.029821921  | 3.628117791 | 0.323242017  | 0.753584304 | 0.753584304 | -5.581650512 |
| 1423961_at   | 0.024005216  | 9.144245484 | 0.323235592  | 0.753589017 | 0.753589017 | -5.581652496 |
| 1422694_at   | 0.042712139  | 3.983577045 | 0.323210761  | 0.753607233 | 0.753607233 | -5.581660163 |
| 1433663_s_at | 0.020218937  | 9.747384547 | 0.323196029  | 0.75361804  | 0.75361804  | -5.581664712 |
| 1444919_at   | -0.021436418 | 3.742398843 | -0.323156151 | 0.753647295 | 0.753647295 | -5.581677023 |
| 1443147_at   | -0.021325727 | 3.09432768  | -0.323134578 | 0.753663122 | 0.753663122 | -5.581683682 |
| 1441860_x_at | 0.040634324  | 7.046480387 | 0.323091755  | 0.753694538 | 0.753694538 | -5.5816969   |
| 1416010_a_at | 0.029706629  | 8.368825579 | 0.323043041  | 0.753730276 | 0.753730276 | -5.581711934 |
| 1453210_at   | -0.037906508 | 5.334565447 | -0.323024312 | 0.753744016 | 0.753744016 | -5.581717713 |
| 1443869_at   | 0.039989183  | 6.415483169 | 0.323013878  | 0.753751671 | 0.753751671 | -5.581720933 |
| 1420123_at   | 0.022304613  | 8.364921255 | 0.322990803  | 0.7537686   | 0.7537686   | -5.581728053 |
| 1437009_a_at | 0.041567567  | 8.91287943  | 0.3229608    | 0.753790612 | 0.753790612 | -5.581737309 |
| 1418654_at   | -0.028617296 | 3.233402632 | -0.322958658 | 0.753792184 | 0.753792184 | -5.58173797  |
| 1441109_at   | -0.043575112 | 4.01740834  | -0.322944596 | 0.753802501 | 0.753802501 | -5.581742309 |
| 1427721_at   | 0.022030087  | 3.707825308 | 0.322937994  | 0.753807344 | 0.753807344 | -5.581744345 |
| 1420092_at   | 0.025513015  | 3.817469555 | 0.322827532  | 0.753888388 | 0.753888388 | -5.581778417 |
| 1417118_a_at | 0.021731647  | 8.872911983 | 0.322806704  | 0.75390367  | 0.75390367  | -5.58178484  |
| 1439765_x_at | -0.024706964 | 8.489136615 | -0.32274021  | 0.753952457 | 0.753952457 | -5.581805343 |
| 1457421_at   | 0.030947068  | 3.549794403 | 0.322663946  | 0.754008415 | 0.754008415 | -5.581828853 |
| 1441347_at   | -0.022924659 | 5.720068125 | -0.322633102 | 0.754031046 | 0.754031046 | -5.58183836  |
| 1417402_at   | -0.032808143 | 8.752096672 | -0.322589297 | 0.754063188 | 0.754063188 | -5.58185186  |
| 1439778_at   | -0.024083087 | 4.205563131 | -0.322562501 | 0.75408285  | 0.75408285  | -5.581860118 |
| 1440083_at   | -0.034249794 | 7.428644548 | -0.322504459 | 0.754125439 | 0.754125439 | -5.581878001 |
| 1460122_at   | -0.025411251 | 6.03817087  | -0.322455677 | 0.754161235 | 0.754161235 | -5.58189303  |
| 1426148_at   | -0.041631302 | 3.959221479 | -0.322433503 | 0.754177507 | 0.754177507 | -5.58189986  |
| 1458102_at   | 0.036418217  | 4.226277587 | 0.322401468  | 0.754201014 | 0.754201014 | -5.581909727 |
| 1448651_at   | 0.027629892  | 9.053875535 | 0.322379951  | 0.754216803 | 0.754216803 | -5.581916354 |
| 1454692_x_at | -0.025172228 | 8.852390405 | -0.322313769 | 0.754265369 | 0.754265369 | -5.581936734 |
| 1443604_at   | -0.029226677 | 3.330598955 | -0.322258165 | 0.754306173 | 0.754306173 | -5.581953854 |
| 1435099_at   | 0.025972958  | 8.897862874 | 0.322212658  | 0.754339568 | 0.754339568 | -5.581967863 |
| 1448387_at   | -0.020671748 | 11.33959069 | -0.322146293 | 0.754388271 | 0.754388271 | -5.58198829  |
| 1430418_at   | 0.025588615  | 8.196652947 | 0.322085511  | 0.754432879 | 0.754432879 | -5.582006994 |
| 1418548_at   | 0.020877983  | 3.290128888 | 0.322079019  | 0.754437643 | 0.754437643 | -5.582008992 |
| 1444364_at   | 0.022101524  | 6.740182188 | 0.322062025  | 0.754450114 | 0.754450114 | -5.58201422  |
| 1454478_at   | -0.028547735 | 3.874564514 | -0.322035029 | 0.754469927 | 0.754469927 | -5.582022526 |
| 1446410_at   | -0.039176608 | 7.013671679 | -0.322021995 | 0.754479493 | 0.754479493 | -5.582026536 |
| 1439731_at   | -0.0275618   | 3.938202617 | -0.321995514 | 0.754498927 | 0.754498927 | -5.582034683 |

|              |              |             |              |             |             |              |
|--------------|--------------|-------------|--------------|-------------|-------------|--------------|
| 1419201_at   | -0.02202333  | 4.077256455 | -0.321946821 | 0.754534664 | 0.754534664 | -5.58204966  |
| 1435322_at   | -0.023649837 | 9.286413001 | -0.321918304 | 0.754555593 | 0.754555593 | -5.582058431 |
| 1455197_at   | -0.031585575 | 3.920765531 | -0.32190888  | 0.75456251  | 0.75456251  | -5.582061329 |
| 1448773_at   | 0.039886908  | 6.802998118 | 0.321885625  | 0.754579578 | 0.754579578 | -5.582068481 |
| 1449573_at   | -0.043335441 | 6.200177933 | -0.321881297 | 0.754582754 | 0.754582754 | -5.582069812 |
| 1457386_at   | -0.125567888 | 6.119032226 | -0.321838331 | 0.754614289 | 0.754614289 | -5.582083023 |
| 1435028_at   | -0.024917433 | 8.446096034 | -0.321810764 | 0.754634522 | 0.754634522 | -5.582091499 |
| 1416599_at   | -0.035333506 | 6.919857873 | -0.321803138 | 0.754640119 | 0.754640119 | -5.582093843 |
| 1444815_at   | 0.023571422  | 3.191712006 | 0.321802129  | 0.75464086  | 0.75464086  | -5.582094154 |
| 1429973_at   | -0.029682804 | 3.802433769 | -0.321789294 | 0.754650281 | 0.754650281 | -5.5820981   |
| 1459969_x_at | -0.034669896 | 3.609785283 | -0.321764333 | 0.754668601 | 0.754668601 | -5.582105773 |
| 1444923_at   | -0.024914353 | 3.987140866 | -0.321662104 | 0.754743636 | 0.754743636 | -5.582137194 |
| 1438558_x_at | -0.038494344 | 3.825879162 | -0.321646107 | 0.754755377 | 0.754755377 | -5.582142109 |
| 1424290_at   | -0.028350598 | 6.981764547 | -0.321632592 | 0.754765298 | 0.754765298 | -5.582146262 |
| 1449651_x_at | -0.024231615 | 5.131754891 | -0.321619139 | 0.754775172 | 0.754775172 | -5.582150396 |
| 1445531_at   | 0.023658187  | 3.746833966 | 0.321599986  | 0.754789231 | 0.754789231 | -5.582156281 |
| 1433262_at   | -0.022653251 | 4.748077637 | -0.321566145 | 0.75481407  | 0.75481407  | -5.582166678 |
| 1443710_s_at | -0.022372262 | 6.06493567  | -0.321556559 | 0.754821107 | 0.754821107 | -5.582169623 |
| 1457968_at   | 0.044307485  | 5.337381858 | 0.321451432  | 0.754898275 | 0.754898275 | -5.582201914 |
| 1423685_at   | -0.028403285 | 9.518139937 | -0.32144513  | 0.7549029   | 0.7549029   | -5.582203849 |
| 1435619_at   | -0.023717062 | 7.979608999 | -0.321437226 | 0.754908702 | 0.754908702 | -5.582206276 |
| 1443726_at   | -0.030337033 | 5.978422723 | -0.321378608 | 0.754951732 | 0.754951732 | -5.582224276 |
| 1457807_at   | 0.027553833  | 3.938561467 | 0.321356223  | 0.754968164 | 0.754968164 | -5.582231149 |
| 1441205_at   | 0.025832927  | 4.959204867 | 0.321334353  | 0.754984218 | 0.754984218 | -5.582237863 |
| 1450256_at   | 0.025567098  | 3.66312844  | 0.321314389  | 0.754998874 | 0.754998874 | -5.582243992 |
| 1424431_at   | -0.039933636 | 8.588629626 | -0.321300157 | 0.755009321 | 0.755009321 | -5.582248361 |
| 1426180_a_at | 0.027486406  | 5.915439718 | 0.321283815  | 0.755021318 | 0.755021318 | -5.582253378 |
| 1435813_at   | -0.077974835 | 5.458915401 | -0.321248316 | 0.755047378 | 0.755047378 | -5.582264274 |
| 1450675_at   | -0.035103673 | 7.363307093 | -0.321164618 | 0.755108822 | 0.755108822 | -5.582289959 |
| 1439288_at   | -0.027392435 | 4.60521626  | -0.321139862 | 0.755126996 | 0.755126996 | -5.582297555 |
| 1443802_at   | 0.026440781  | 5.164750769 | 0.321138181  | 0.75512823  | 0.75512823  | -5.582298071 |
| 1436556_at   | 0.034176165  | 4.558853884 | 0.321016574  | 0.755217508 | 0.755217508 | -5.582335375 |
| 1448057_at   | -0.062039283 | 6.529976417 | -0.321014987 | 0.755218673 | 0.755218673 | -5.582335862 |
| 1419683_at   | -0.024736835 | 5.071422877 | -0.320997965 | 0.75523117  | 0.75523117  | -5.582341082 |
| 1452618_at   | -0.0229092   | 7.696741555 | -0.320973433 | 0.755249181 | 0.755249181 | -5.582348606 |
| 1431130_at   | 0.032666913  | 3.964844099 | 0.320968265  | 0.755252975 | 0.755252975 | -5.582350191 |
| 1417866_at   | 0.040553367  | 8.649256964 | 0.320893837  | 0.755307619 | 0.755307619 | -5.582373012 |
| 1426768_at   | -0.021944235 | 6.999017666 | -0.320855127 | 0.75533604  | 0.75533604  | -5.58238488  |
| 1459070_at   | -0.020427373 | 5.633581983 | -0.320847513 | 0.75534163  | 0.75534163  | -5.582387213 |
| 1441795_at   | 0.038455775  | 5.654649009 | 0.32079715   | 0.755378608 | 0.755378608 | -5.582402651 |
| 1455111_at   | -0.038068527 | 7.657875677 | -0.320795694 | 0.755379677 | 0.755379677 | -5.582403097 |
| 1447351_x_at | -0.021127876 | 3.264057334 | -0.320676025 | 0.755467542 | 0.755467542 | -5.582439769 |
| 1432079_at   | 0.029160718  | 4.253882999 | 0.320597978  | 0.755524849 | 0.755524849 | -5.582463679 |
| 1457247_at   | -0.024312333 | 6.21201399  | -0.320587281 | 0.755532704 | 0.755532704 | -5.582466955 |
| 1418340_at   | -0.032045411 | 7.407308592 | -0.320573846 | 0.755542568 | 0.755542568 | -5.58247107  |
| 1417229_at   | 0.045871882  | 5.915506907 | 0.320514188  | 0.755586375 | 0.755586375 | -5.582489342 |
| 1456877_at   | 0.052002176  | 5.35146872  | 0.320497443  | 0.75559867  | 0.75559867  | -5.582494469 |
| 1459822_at   | 0.036176997  | 3.385215306 | 0.320458709  | 0.755627113 | 0.755627113 | -5.58250633  |
| 1456322_at   | 0.031926356  | 5.713999489 | 0.320449257  | 0.755634054 | 0.755634054 | -5.582509224 |
| 1435788_at   | -0.033502447 | 7.254272672 | -0.320441583 | 0.755639689 | 0.755639689 | -5.582511574 |
| 1450593_at   | -0.02590636  | 3.465003207 | -0.32043738  | 0.755642775 | 0.755642775 | -5.58251286  |
| 1436925_at   | 0.030336167  | 8.495041542 | 0.320427352  | 0.755650139 | 0.755650139 | -5.582515931 |
| 1454080_at   | -0.029738884 | 3.609521946 | -0.320419694 | 0.755655763 | 0.755655763 | -5.582518275 |

|              |              |             |              |             |             |              |
|--------------|--------------|-------------|--------------|-------------|-------------|--------------|
| 1449027_at   | -0.024953904 | 7.747854913 | -0.320418938 | 0.755656317 | 0.755656317 | -5.582518506 |
| 1457192_at   | 0.020125946  | 3.97717319  | 0.320409736  | 0.755663075 | 0.755663075 | -5.582521324 |
| 1422589_at   | -0.036966278 | 7.365819674 | -0.320360481 | 0.755699244 | 0.755699244 | -5.582536402 |
| 1433708_at   | 0.019529104  | 9.806025363 | 0.32029286   | 0.755748901 | 0.755748901 | -5.582557098 |
| 1451859_at   | -0.026217979 | 3.415640258 | -0.320247669 | 0.755782087 | 0.755782087 | -5.582570926 |
| 1434889_at   | -0.032817702 | 6.757339365 | -0.320175863 | 0.75583482  | 0.75583482  | -5.582592896 |
| 1432193_at   | 0.024758423  | 3.820075036 | 0.32013487   | 0.755864925 | 0.755864925 | -5.582605436 |
| 1442881_at   | -0.025678904 | 6.819142555 | -0.320113027 | 0.755880966 | 0.755880966 | -5.582612117 |
| 1458184_at   | 0.022596108  | 3.629371202 | 0.32010882   | 0.755884055 | 0.755884055 | -5.582613404 |
| 1433103_at   | 0.032209259  | 3.811082979 | 0.320093742  | 0.755895129 | 0.755895129 | -5.582618015 |
| 1460300_a_at | -0.046605916 | 4.931543368 | -0.320093403 | 0.755895378 | 0.755895378 | -5.582618119 |
| 1433640_at   | -0.043593814 | 8.946945471 | -0.320092439 | 0.755896086 | 0.755896086 | -5.582618414 |
| 1454044_a_at | 0.025968726  | 9.429608686 | 0.320082397  | 0.755903461 | 0.755903461 | -5.582621485 |
| 1434926_at   | -0.035170211 | 7.73942868  | -0.320069445 | 0.755912973 | 0.755912973 | -5.582625446 |
| 1442563_at   | 0.024482848  | 4.713140272 | 0.320053194  | 0.755924908 | 0.755924908 | -5.582630416 |
| 1437516_at   | -0.029891332 | 4.350495899 | -0.320026367 | 0.75594461  | 0.75594461  | -5.58263862  |
| 1448482_at   | 0.029428207  | 5.508763963 | 0.319941421  | 0.756006997 | 0.756006997 | -5.582664591 |
| 1441739_at   | 0.021050321  | 6.833786388 | 0.319933146  | 0.756013075 | 0.756013075 | -5.582667121 |
| 1420206_at   | -0.02647994  | 3.634172763 | -0.319932651 | 0.756013438 | 0.756013438 | -5.582667272 |
| 1434065_at   | 0.029520287  | 7.41443918  | 0.31987979   | 0.756052262 | 0.756052262 | -5.58268343  |
| 1439121_at   | 0.029780015  | 5.865196967 | 0.319864569  | 0.756063441 | 0.756063441 | -5.582688082 |
| 1438774_s_at | 0.039891717  | 4.002060463 | 0.31979889   | 0.75611168  | 0.75611168  | -5.582708154 |
| 1446099_at   | -0.022668612 | 5.035501932 | -0.319763658 | 0.756137558 | 0.756137558 | -5.582718919 |
| 1441754_at   | -0.026766186 | 5.314250517 | -0.319753404 | 0.756145089 | 0.756145089 | -5.582722052 |
| 1422584_at   | -0.037359823 | 7.410113481 | -0.319739755 | 0.756155114 | 0.756155114 | -5.582726222 |
| 1424798_a_at | -0.036651446 | 3.544493403 | -0.319702564 | 0.756182431 | 0.756182431 | -5.582737584 |
| 1459998_at   | 0.034490252  | 8.047686388 | 0.319683546  | 0.7561964   | 0.7561964   | -5.582743393 |
| 1433570_s_at | 0.025243138  | 9.552704129 | 0.319599142  | 0.756258396 | 0.756258396 | -5.582769172 |
| 1423317_at   | -0.020030061 | 10.41967995 | -0.319542862 | 0.756299736 | 0.756299736 | -5.582786358 |
| 1447032_at   | 0.026666952  | 4.230594059 | 0.31944132   | 0.756374325 | 0.756374325 | -5.582817357 |
| 1458382_a_at | -0.072052195 | 6.362946035 | -0.319435113 | 0.756378884 | 0.756378884 | -5.582819251 |
| 1430001_at   | 0.031675084  | 3.348991498 | 0.319389354  | 0.756412498 | 0.756412498 | -5.582833217 |
| 1423953_at   | -0.022997237 | 6.895572584 | -0.319378737 | 0.756420297 | 0.756420297 | -5.582836458 |
| 1453646_at   | -0.051892359 | 6.828896591 | -0.319374885 | 0.756423127 | 0.756423127 | -5.582837633 |
| 1449743_a_at | -0.032134617 | 3.968821692 | -0.319313471 | 0.756468241 | 0.756468241 | -5.582856373 |
| 1428817_at   | 0.021085752  | 9.953305177 | 0.319285485  | 0.7564888   | 0.7564888   | -5.582864912 |
| 1456137_at   | -0.030242881 | 3.580057736 | -0.319222641 | 0.756534966 | 0.756534966 | -5.582884083 |
| 1439183_at   | 0.033692903  | 3.172860385 | 0.319213408  | 0.756541749 | 0.756541749 | -5.5828869   |
| 1438356_x_at | 0.02682085   | 4.542933026 | 0.319207852  | 0.756545831 | 0.756545831 | -5.582888594 |
| 1445482_at   | -0.033750873 | 5.204366471 | -0.319133416 | 0.756600514 | 0.756600514 | -5.582911296 |
| 1439831_at   | -0.028718866 | 4.256111241 | -0.319068485 | 0.756648216 | 0.756648216 | -5.582931095 |
| 1438325_at   | -0.03451132  | 8.920220264 | -0.31906021  | 0.756654296 | 0.756654296 | -5.582933618 |
| 1454723_at   | 0.019186937  | 8.711950609 | 0.319055545  | 0.756657723 | 0.756657723 | -5.58293504  |
| 1440434_at   | -0.055593535 | 6.268240845 | -0.319036961 | 0.756671376 | 0.756671376 | -5.582940706 |
| 1417008_at   | -0.035638379 | 7.525807587 | -0.319024902 | 0.756680235 | 0.756680235 | -5.582944382 |
| 1426780_at   | 0.022583646  | 6.992590849 | 0.31894634   | 0.756737954 | 0.756737954 | -5.582968329 |
| 1435233_at   | -0.029314809 | 9.396220035 | -0.318864857 | 0.75679782  | 0.75679782  | -5.582993159 |
| 1434797_at   | -0.022804973 | 9.06197897  | -0.318754853 | 0.756878644 | 0.756878644 | -5.583026672 |
| 1454029_at   | -0.024582926 | 3.398099056 | -0.318708765 | 0.756912507 | 0.756912507 | -5.583040709 |
| 1434067_at   | 0.049749677  | 4.306659483 | 0.318649432  | 0.756956103 | 0.756956103 | -5.583058778 |
| 1443456_at   | -0.030324107 | 4.788058627 | -0.318636046 | 0.756965939 | 0.756965939 | -5.583062854 |
| 1451265_at   | 0.024490077  | 7.636004275 | 0.31862152   | 0.756976613 | 0.756976613 | -5.583067277 |
| 1430567_at   | 0.027908046  | 3.509140746 | 0.318613088  | 0.756982808 | 0.756982808 | -5.583069844 |



|              |              |             |              |             |             |              |
|--------------|--------------|-------------|--------------|-------------|-------------|--------------|
| 1424218_a_at | -0.041983593 | 5.16274944  | -0.318567907 | 0.757016006 | 0.757016006 | -5.583083599 |
| 1457232_at   | -0.035636678 | 4.646732645 | -0.318550491 | 0.757028804 | 0.757028804 | -5.583088901 |
| 1445818_at   | 0.025286917  | 3.769979526 | 0.318518647  | 0.757052203 | 0.757052203 | -5.583098593 |
| 1417037_at   | 0.024676186  | 8.882092222 | 0.318517026  | 0.757053394 | 0.757053394 | -5.583099087 |
| 1424869_at   | -0.021529681 | 8.134094526 | -0.318513928 | 0.757055567 | 0.757055567 | -5.58310003  |
| 1442717_at   | 0.019759112  | 7.369714002 | 0.318494701  | 0.757069798 | 0.757069798 | -5.583105882 |
| 1457986_at   | -0.024791276 | 3.837568906 | -0.318393592 | 0.757144096 | 0.757144096 | -5.58313665  |
| 1419629_at   | -0.032355528 | 4.666930812 | -0.318355406 | 0.757172157 | 0.757172157 | -5.583148268 |
| 1436975_at   | -0.0295699   | 4.198760707 | -0.318336873 | 0.757185776 | 0.757185776 | -5.583153906 |
| 1431732_at   | -0.021755348 | 4.462874472 | -0.31823937  | 0.757257428 | 0.757257428 | -5.583183562 |
| 1438515_at   | 0.054480779  | 7.122092718 | 0.318185613  | 0.757296933 | 0.757296933 | -5.583199909 |
| 1435327_at   | 0.026528914  | 9.138083654 | 0.318171557  | 0.757307263 | 0.757307263 | -5.583204183 |
| 1425630_at   | -0.032203207 | 5.394936541 | -0.318152026 | 0.757321616 | 0.757321616 | -5.583210121 |
| 1444384_at   | -0.026615332 | 7.808783643 | -0.318128147 | 0.757339165 | 0.757339165 | -5.583217381 |
| 1451107_at   | 0.021186712  | 6.758800489 | 0.318122391  | 0.757343395 | 0.757343395 | -5.583219131 |
| 1441603_at   | 0.023291707  | 3.2976926   | 0.318072938  | 0.757379739 | 0.757379739 | -5.583234164 |
| 1422055_at   | -0.045682462 | 4.779256143 | -0.318052267 | 0.75739493  | 0.75739493  | -5.583240447 |
| 1429654_at   | -0.021804995 | 3.636550327 | -0.317977322 | 0.75745001  | 0.75745001  | -5.583263223 |
| 1446132_at   | -0.039627622 | 3.683814429 | -0.317936071 | 0.757480328 | 0.757480328 | -5.583275758 |
| 1435892_at   | -0.022815223 | 8.179925655 | -0.317889677 | 0.757514426 | 0.757514426 | -5.583289853 |
| 1427302_at   | 0.028340593  | 6.307119886 | 0.31780772   | 0.757574662 | 0.757574662 | -5.583314747 |
| 1450803_at   | -0.030466215 | 7.358075548 | -0.317776881 | 0.757597328 | 0.757597328 | -5.583324113 |
| 1450968_at   | 0.020978467  | 10.55838339 | 0.317747613  | 0.757618841 | 0.757618841 | -5.583333001 |
| 1448683_at   | 0.022754685  | 3.572366206 | 0.317742785  | 0.757622389 | 0.757622389 | -5.583334467 |
| 1421617_at   | -0.029179991 | 3.250348132 | -0.317736259 | 0.757627186 | 0.757627186 | -5.583336448 |
| 1442179_at   | -0.034457851 | 3.739319914 | -0.317714399 | 0.757643253 | 0.757643253 | -5.583343086 |
| 1428145_at   | 0.022164891  | 9.113816721 | 0.317704371  | 0.757650624 | 0.757650624 | -5.58334613  |
| 1429771_at   | 0.021913043  | 8.685793094 | 0.317686305  | 0.757663903 | 0.757663903 | -5.583351616 |
| 1440076_at   | -0.025670181 | 6.910113874 | -0.317657928 | 0.757684761 | 0.757684761 | -5.58336023  |
| 1458852_at   | -0.031771748 | 3.950338529 | -0.31765367  | 0.757687891 | 0.757687891 | -5.583361523 |
| 1425347_a_at | 0.036387367  | 6.44716502  | 0.31755547   | 0.757760072 | 0.757760072 | -5.583391329 |
| 1431346_at   | 0.031912218  | 4.159679035 | 0.317550596  | 0.757763654 | 0.757763654 | -5.583392808 |
| 1460129_at   | 0.041312837  | 4.653403162 | 0.317543034  | 0.757769213 | 0.757769213 | -5.583395103 |
| 1442193_at   | -0.031324092 | 3.730786468 | -0.317436276 | 0.757847687 | 0.757847687 | -5.583427495 |
| 1446946_at   | -0.023356934 | 6.293306071 | -0.317409657 | 0.757867255 | 0.757867255 | -5.58343557  |
| 1449219_at   | -0.034874787 | 5.036873171 | -0.31732121  | 0.757932272 | 0.757932272 | -5.583462396 |
| 1454524_at   | 0.034429959  | 4.395787647 | 0.317191721  | 0.758027464 | 0.758027464 | -5.583501657 |
| 1455767_x_at | -0.021571155 | 12.68178071 | -0.317171632 | 0.758042232 | 0.758042232 | -5.583507747 |
| 1429610_a_at | 0.028484986  | 6.624178276 | 0.317146478  | 0.758060724 | 0.758060724 | -5.583515371 |
| 1439680_at   | -0.021838461 | 3.709758058 | -0.317137923 | 0.758067014 | 0.758067014 | -5.583517964 |
| 1444022_at   | -0.039481658 | 6.095873194 | -0.317051487 | 0.758130559 | 0.758130559 | -5.583544158 |
| 1430702_at   | -0.032127764 | 8.118300098 | -0.317035265 | 0.758142485 | 0.758142485 | -5.583549073 |
| 1452422_a_at | -0.022482887 | 10.40370319 | -0.316993257 | 0.758173369 | 0.758173369 | -5.583561801 |
| 1439790_at   | -0.022904741 | 4.174095097 | -0.316975766 | 0.758186228 | 0.758186228 | -5.5835671   |
| 1432375_a_at | -0.024816945 | 4.992995239 | -0.316965896 | 0.758193485 | 0.758193485 | -5.583570089 |
| 1439053_at   | -0.044454454 | 4.785528174 | -0.316954851 | 0.758201605 | 0.758201605 | -5.583573435 |
| 1456403_at   | -0.02544181  | 3.978975328 | -0.316951884 | 0.758203787 | 0.758203787 | -5.583574334 |
| 1418512_at   | 0.039574433  | 9.008891871 | 0.316937385  | 0.758214446 | 0.758214446 | -5.583578726 |
| 1422608_at   | 0.022609857  | 9.371276617 | 0.316912911  | 0.75823244  | 0.75823244  | -5.583586139 |
| 1446213_at   | -0.034215585 | 4.188155788 | -0.316880313 | 0.758256407 | 0.758256407 | -5.583596012 |
| 1440212_at   | 0.027299019  | 5.241979629 | 0.316810149  | 0.758307994 | 0.758307994 | -5.583617258 |
| 1437796_at   | 0.024682893  | 3.988324748 | 0.316808715  | 0.758309048 | 0.758309048 | -5.583617693 |
| 1427973_s_at | -0.029423186 | 5.451219948 | -0.316803116 | 0.758313165 | 0.758313165 | -5.583619388 |

|              |              |             |              |             |             |              |
|--------------|--------------|-------------|--------------|-------------|-------------|--------------|
| 1439487_at   | 0.027770834  | 6.846621788 | 0.316792597  | 0.758320898 | 0.758320898 | -5.583622572 |
| 1437972_s_at | -0.02238634  | 10.8737282  | -0.316761795 | 0.758343546 | 0.758343546 | -5.583631898 |
| 1433988_s_at | -0.032167891 | 6.088231362 | -0.316761742 | 0.758343585 | 0.758343585 | -5.583631914 |
| 1419236_at   | -0.025919416 | 7.013233325 | -0.316746316 | 0.758354927 | 0.758354927 | -5.583636584 |
| 1457804_at   | -0.024817684 | 4.023202255 | -0.316734718 | 0.758363455 | 0.758363455 | -5.583640095 |
| 1455170_at   | -0.030512025 | 7.104822905 | -0.316718328 | 0.758375505 | 0.758375505 | -5.583645056 |
| 1455305_x_at | -0.024042545 | 10.52150396 | -0.316715044 | 0.75837792  | 0.75837792  | -5.58364605  |
| 1434116_at   | 0.023465858  | 8.62996595  | 0.316682938  | 0.758401527 | 0.758401527 | -5.583655768 |
| 1432145_at   | 0.024220938  | 3.650228901 | 0.316677909  | 0.758405225 | 0.758405225 | -5.58365729  |
| 1441411_at   | 0.020753649  | 6.092347259 | 0.316672267  | 0.758409373 | 0.758409373 | -5.583658998 |
| 1418622_at   | 0.020418339  | 11.55370153 | 0.316669039  | 0.758411746 | 0.758411746 | -5.583659975 |
| 1448866_at   | -0.029661774 | 10.52193206 | -0.316594107 | 0.758466843 | 0.758466843 | -5.58368265  |
| 1424154_a_at | -0.021739162 | 9.817327735 | -0.316542181 | 0.758505025 | 0.758505025 | -5.583698361 |
| 1434808_at   | -0.030147273 | 6.769731118 | -0.316505123 | 0.758532274 | 0.758532274 | -5.583709572 |
| 1438348_x_at | -0.023831568 | 5.227250529 | -0.316468845 | 0.75855895  | 0.75855895  | -5.583720545 |
| 1437597_at   | -0.02225647  | 3.117430045 | -0.316462846 | 0.758563361 | 0.758563361 | -5.583722359 |
| 1458215_at   | -0.026375297 | 5.137696324 | -0.316459545 | 0.758565789 | 0.758565789 | -5.583723358 |
| 1439785_at   | 0.023580572  | 2.989962103 | 0.316362966  | 0.758636808 | 0.758636808 | -5.583752564 |
| 1450881_s_at | 0.024963638  | 8.015227435 | 0.316356765  | 0.758641368 | 0.758641368 | -5.583754439 |
| 1459870_x_at | -0.021674115 | 5.798107462 | -0.316355545 | 0.758642265 | 0.758642265 | -5.583754808 |
| 1430141_at   | -0.025785451 | 3.979039836 | -0.316333576 | 0.75865842  | 0.75865842  | -5.58376145  |
| 1429608_at   | -0.030710753 | 3.708855691 | -0.316315175 | 0.758671952 | 0.758671952 | -5.583767013 |
| 1445903_at   | 0.027706262  | 4.089068321 | 0.316309773  | 0.758675924 | 0.758675924 | -5.583768647 |
| 1436467_at   | -0.100648283 | 5.570799331 | -0.316309033 | 0.758676468 | 0.758676468 | -5.58376887  |
| 1451500_at   | 0.022580909  | 6.1566833   | 0.316212617  | 0.758747371 | 0.758747371 | -5.583798014 |
| 1446889_at   | -0.024915199 | 4.128077376 | -0.316200355 | 0.758756389 | 0.758756389 | -5.58380172  |
| 1427135_at   | 0.02836923   | 7.987907509 | 0.316193009  | 0.758761791 | 0.758761791 | -5.58380394  |
| 1443436_at   | -0.024659987 | 6.14382257  | -0.316119796 | 0.758815632 | 0.758815632 | -5.583826063 |
| 1447839_x_at | 0.024682935  | 5.756215077 | 0.31611684   | 0.758817807 | 0.758817807 | -5.583826956 |
| 1428098_a_at | -0.022342602 | 7.474676366 | -0.316104494 | 0.758826886 | 0.758826886 | -5.583830686 |
| 1432823_at   | -0.027609493 | 4.748399819 | -0.316083042 | 0.758842663 | 0.758842663 | -5.583837167 |
| 1440479_at   | -0.02060097  | 4.881262549 | -0.316075424 | 0.758848265 | 0.758848265 | -5.583839468 |
| 1439601_at   | 0.028713207  | 6.210877728 | 0.316075111  | 0.758848495 | 0.758848495 | -5.583839563 |
| 1428300_at   | -0.023604229 | 9.14682664  | -0.31603933  | 0.75887481  | 0.75887481  | -5.583850372 |
| 1452221_a_at | -0.020353417 | 8.998193412 | -0.316026688 | 0.758884107 | 0.758884107 | -5.58385419  |
| 1430516_at   | 0.024333766  | 7.393273535 | 0.315982456  | 0.758916638 | 0.758916638 | -5.58386755  |
| 1421559_at   | -0.024583704 | 3.715007846 | -0.315965557 | 0.758929066 | 0.758929066 | -5.583872653 |
| 1433818_at   | -0.035177779 | 5.438872594 | -0.315873222 | 0.758996976 | 0.758996976 | -5.583900534 |
| 1454767_at   | 0.021667041  | 6.760676532 | 0.315851703  | 0.759012803 | 0.759012803 | -5.583907031 |
| 1451420_at   | -0.024052626 | 9.99468761  | -0.315797081 | 0.759052977 | 0.759052977 | -5.583923519 |
| 1435789_x_at | -0.025453207 | 7.278966593 | -0.315754205 | 0.759084512 | 0.759084512 | -5.583936459 |
| 1431551_at   | -0.035498134 | 4.821456133 | -0.31570599  | 0.759119975 | 0.759119975 | -5.583951009 |
| 1445438_at   | 0.024603593  | 5.963848449 | 0.315662327  | 0.759152091 | 0.759152091 | -5.583964184 |
| 1424942_a_at | -0.025463766 | 8.921610714 | -0.315636279 | 0.75917125  | 0.75917125  | -5.583972043 |
| 1450765_a_at | 0.023471411  | 4.37209742  | 0.315625722  | 0.759179015 | 0.759179015 | -5.583975227 |
| 1445589_at   | 0.025810291  | 6.412064766 | 0.31561223   | 0.75918894  | 0.75918894  | -5.583979298 |
| 1442585_at   | 0.023405023  | 5.300161016 | 0.315539474  | 0.759242456 | 0.759242456 | -5.584001243 |
| 1449232_at   | 0.025221056  | 3.946132816 | 0.315538085  | 0.759243477 | 0.759243477 | -5.584001662 |
| 1422059_at   | 0.041904273  | 6.29389663  | 0.315386608  | 0.759354902 | 0.759354902 | -5.584047336 |
| 1417433_at   | 0.023180139  | 9.416587995 | 0.31537433   | 0.759363934 | 0.759363934 | -5.584051037 |
| 1424019_at   | -0.024035264 | 8.497576352 | -0.315369381 | 0.759367575 | 0.759367575 | -5.584052529 |
| 1429425_at   | -0.023041467 | 9.934860097 | -0.315322895 | 0.75940177  | 0.75940177  | -5.584066541 |
| 1441414_at   | 0.026290691  | 7.151081526 | 0.315305321  | 0.759414698 | 0.759414698 | -5.584071837 |

|              |              |             |              |             |             |              |
|--------------|--------------|-------------|--------------|-------------|-------------|--------------|
| 1448003_at   | 0.025648717  | 7.607350894 | 0.315287583  | 0.759427747 | 0.759427747 | -5.584077183 |
| 1456095_at   | -0.024181614 | 3.160369076 | -0.315251286 | 0.759454448 | 0.759454448 | -5.584088121 |
| 1444733_at   | 0.029427513  | 3.314061672 | 0.315246682  | 0.759457835 | 0.759457835 | -5.584089508 |
| 1453656_a_at | -0.024077376 | 3.370973769 | -0.315246145 | 0.75945823  | 0.75945823  | -5.58408967  |
| 1447519_x_at | -0.022635616 | 5.603265831 | -0.31524087  | 0.759462111 | 0.759462111 | -5.584091259 |
| 1424574_at   | -0.046134357 | 8.778086387 | -0.315229246 | 0.759470662 | 0.759470662 | -5.584094762 |
| 1426779_x_at | -0.021470934 | 9.351109979 | -0.315206292 | 0.759487548 | 0.759487548 | -5.584101678 |
| 1460288_a_at | 0.022359294  | 10.31876486 | 0.315122532  | 0.759549167 | 0.759549167 | -5.58412691  |
| 1418481_at   | 0.025112473  | 8.016565131 | 0.3151009    | 0.759565081 | 0.759565081 | -5.584133426 |
| 1459148_at   | 0.040055659  | 4.804509578 | 0.315079038  | 0.759581165 | 0.759581165 | -5.58414001  |
| 1428676_at   | -0.034651428 | 6.363519638 | -0.315060134 | 0.759595072 | 0.759595072 | -5.584145703 |
| 1419876_at   | -0.036583396 | 6.430753611 | -0.315033023 | 0.759615018 | 0.759615018 | -5.584153868 |
| 1448326_a_at | -0.02486319  | 9.410367076 | -0.315020166 | 0.759624476 | 0.759624476 | -5.584157739 |
| 1443770_x_at | 0.050296145  | 6.680759922 | 0.314972579  | 0.759659487 | 0.759659487 | -5.584172067 |
| 1435652_a_at | -0.041216298 | 10.87323121 | -0.31495724  | 0.759670772 | 0.759670772 | -5.584176685 |
| 1431454_at   | 0.025129934  | 3.1451506   | 0.314939557  | 0.759683781 | 0.759683781 | -5.584182008 |
| 1449085_at   | -0.023468143 | 10.2514122  | -0.314858506 | 0.759743413 | 0.759743413 | -5.584206404 |
| 1453467_s_at | 0.02722926   | 13.25750306 | 0.314849987  | 0.759749681 | 0.759749681 | -5.584208968 |
| 1442484_at   | 0.023909851  | 8.090248184 | 0.314829165  | 0.759765    | 0.759765    | -5.584215235 |
| 1459398_at   | 0.046216282  | 5.371573197 | 0.314779062  | 0.759801864 | 0.759801864 | -5.584230311 |
| 1454887_at   | 0.022752824  | 8.700729951 | 0.314777809  | 0.759802786 | 0.759802786 | -5.584230688 |
| 1455416_at   | -0.024158315 | 4.796755865 | -0.314771916 | 0.759807122 | 0.759807122 | -5.584232461 |
| 1425403_at   | -0.023608535 | 6.516216841 | -0.314764818 | 0.759812344 | 0.759812344 | -5.584234597 |
| 1419316_s_at | -0.035864373 | 6.429860797 | -0.314722618 | 0.759843394 | 0.759843394 | -5.584247293 |
| 1452792_at   | -0.020244954 | 9.476534551 | -0.314690497 | 0.759867027 | 0.759867027 | -5.584256956 |
| 1442035_at   | 0.028238596  | 3.766981437 | 0.31468547   | 0.759870726 | 0.759870726 | -5.584258468 |
| 1456554_at   | -0.034847892 | 3.669817082 | -0.314662311 | 0.759887767 | 0.759887767 | -5.584265434 |
| 1418774_a_at | 0.02765757   | 8.360011981 | 0.314654596  | 0.759893443 | 0.759893443 | -5.584267754 |
| 1417882_at   | 0.022809799  | 6.31268071  | 0.314616342  | 0.759921591 | 0.759921591 | -5.584279259 |
| 1448609_at   | 0.046091692  | 8.167505199 | 0.314476706  | 0.760024337 | 0.760024337 | -5.584321243 |
| 1456739_x_at | 0.030619994  | 11.15126245 | 0.314450881  | 0.76004334  | 0.76004334  | -5.584329006 |
| 1449579_at   | -0.038207851 | 7.687036064 | -0.314444683 | 0.760047901 | 0.760047901 | -5.584330869 |
| 1459735_at   | 0.023584819  | 4.726378087 | 0.314438699  | 0.760052304 | 0.760052304 | -5.584332668 |
| 1439375_x_at | -0.032642624 | 10.31309444 | -0.314432145 | 0.760057127 | 0.760057127 | -5.584334638 |
| 1456991_at   | 0.032377542  | 4.447569831 | 0.314408588  | 0.760074461 | 0.760074461 | -5.584341718 |
| 1450151_at   | 0.051412521  | 6.664131352 | 0.314402585  | 0.760078879 | 0.760078879 | -5.584343522 |
| 1438181_x_at | 0.039738336  | 8.887261128 | 0.31439213   | 0.760086573 | 0.760086573 | -5.584346664 |
| 1455735_at   | 0.060196137  | 5.953207867 | 0.314292137  | 0.760160154 | 0.760160154 | -5.58437671  |
| 1438554_x_at | 0.021166057  | 12.41412887 | 0.314283441  | 0.760166554 | 0.760166554 | -5.584379323 |
| 1422944_a_at | -0.046294894 | 6.524646083 | -0.314257888 | 0.760185358 | 0.760185358 | -5.584386999 |
| 1431637_at   | 0.025422276  | 4.188811012 | 0.314192725  | 0.760233312 | 0.760233312 | -5.584406572 |
| 1460285_at   | 0.081663326  | 7.530619437 | 0.314115711  | 0.760289987 | 0.760289987 | -5.5844297   |
| 1451036_at   | 0.02838449   | 9.068573628 | 0.314109662  | 0.760294439 | 0.760294439 | -5.584431516 |
| 1437821_at   | 0.024959728  | 7.143285988 | 0.314092133  | 0.760307339 | 0.760307339 | -5.584436779 |
| 1420348_at   | 0.028996445  | 3.600519779 | 0.314033137  | 0.760350756 | 0.760350756 | -5.584454491 |
| 1436021_at   | -0.043634845 | 4.850192016 | -0.314014442 | 0.760364515 | 0.760364515 | -5.584460103 |
| 1419946_s_at | -0.022080251 | 4.020859956 | -0.314004558 | 0.76037179  | 0.76037179  | -5.58446307  |
| 1453674_at   | -0.022426728 | 3.90714994  | -0.313990429 | 0.760382188 | 0.760382188 | -5.584467311 |
| 1416234_at   | -0.021368798 | 11.08121857 | -0.313957805 | 0.760406198 | 0.760406198 | -5.584477102 |
| 1424661_at   | 0.020845896  | 8.26282018  | 0.313946581  | 0.760414459 | 0.760414459 | -5.584480471 |
| 1451645_at   | -0.021512754 | 7.558362461 | -0.313865721 | 0.76047397  | 0.76047397  | -5.584504734 |
| 1447807_s_at | 0.039452132  | 6.700666293 | 0.313860846  | 0.760477558 | 0.760477558 | -5.584506197 |
| 1452084_at   | -0.025091095 | 9.001724049 | -0.313834075 | 0.760497261 | 0.760497261 | -5.584514229 |

|              |              |             |              |             |             |              |
|--------------|--------------|-------------|--------------|-------------|-------------|--------------|
| 1456560_at   | -0.027389275 | 4.000019334 | -0.313808118 | 0.760516366 | 0.760516366 | -5.584522016 |
| 1422643_at   | 0.046673254  | 7.526879974 | 0.313728623  | 0.760574875 | 0.760574875 | -5.58454586  |
| 1456583_x_at | 0.025559808  | 6.66233151  | 0.313727286  | 0.760575859 | 0.760575859 | -5.584546261 |
| 1458392_at   | -0.025287462 | 3.637517066 | -0.313685404 | 0.760606686 | 0.760606686 | -5.58455882  |
| 1448396_at   | -0.020873245 | 9.747458373 | -0.31365135  | 0.760631751 | 0.760631751 | -5.584569032 |
| 1448192_s_at | 0.025569107  | 9.497098175 | 0.313598216  | 0.76067086  | 0.76067086  | -5.584584962 |
| 1419836_at   | -0.022482926 | 4.956049724 | -0.313588911 | 0.76067771  | 0.76067771  | -5.584587751 |
| 1427116_at   | -0.026215688 | 8.791534321 | -0.313542498 | 0.760711873 | 0.760711873 | -5.584601664 |
| 1448875_at   | 0.024855861  | 8.531366978 | 0.313541722  | 0.760712444 | 0.760712444 | -5.584601896 |
| 1452964_at   | -0.024804303 | 6.281060499 | -0.313541315 | 0.760712744 | 0.760712744 | -5.584602018 |
| 1458637_x_at | -0.025932953 | 7.179042672 | -0.31351489  | 0.760732194 | 0.760732194 | -5.584609938 |
| 1421751_a_at | 0.01950914   | 11.23706889 | 0.313510515  | 0.760735415 | 0.760735415 | -5.58461125  |
| 1448128_at   | -0.023969306 | 9.459386447 | -0.313434116 | 0.760791652 | 0.760791652 | -5.584634144 |
| 1450792_at   | -0.055606055 | 8.359357163 | -0.313414913 | 0.760805787 | 0.760805787 | -5.584639897 |
| 1433005_at   | 0.026592274  | 5.220140873 | 0.313395647  | 0.760819969 | 0.760819969 | -5.58464567  |
| 1457026_at   | 0.027061024  | 3.789413974 | 0.313389585  | 0.760824431 | 0.760824431 | -5.584647486 |
| 1417753_at   | -0.022338932 | 9.899755546 | -0.313352917 | 0.760851423 | 0.760851423 | -5.58465847  |
| 1439042_at   | 0.019592461  | 3.728969186 | 0.313345167  | 0.760857128 | 0.760857128 | -5.584660792 |
| 1458118_at   | 0.024670812  | 3.955115214 | 0.313312031  | 0.76088152  | 0.76088152  | -5.584670717 |
| 1457859_at   | -0.023256327 | 3.648130471 | -0.31330318  | 0.760888036 | 0.760888036 | -5.584673368 |
| 1433569_x_at | -0.0205777   | 12.5729209  | -0.313281466 | 0.76090402  | 0.76090402  | -5.584679872 |
| 1452130_at   | 0.027890611  | 8.66931461  | 0.313265854  | 0.760915513 | 0.760915513 | -5.584684547 |
| 1432051_at   | -0.021114328 | 3.267648444 | -0.313182879 | 0.760976595 | 0.760976595 | -5.584709393 |
| 1428065_at   | -0.021346547 | 8.751946505 | -0.313166742 | 0.760988475 | 0.760988475 | -5.584714224 |
| 1422920_at   | 0.041046316  | 4.905982569 | 0.313142834  | 0.761006075 | 0.761006075 | -5.584721382 |
| 1437640_at   | -0.031851191 | 6.656862255 | -0.313102889 | 0.761035482 | 0.761035482 | -5.584733338 |
| 1434188_at   | -0.030830266 | 3.417292324 | -0.313090616 | 0.761044517 | 0.761044517 | -5.584737012 |
| 1440599_at   | -0.025071835 | 3.67300793  | -0.313031324 | 0.761088168 | 0.761088168 | -5.584754757 |
| 1444648_at   | 0.022348033  | 4.384763827 | 0.3129909    | 0.761117928 | 0.761117928 | -5.584766854 |
| 1438549_a_at | 0.036618529  | 7.358864899 | 0.312979773  | 0.76112612  | 0.76112612  | -5.584770183 |
| 1430213_at   | -0.022803591 | 5.507586511 | -0.312941738 | 0.761154122 | 0.761154122 | -5.584781563 |
| 1434268_at   | -0.023212463 | 8.633267068 | -0.312937467 | 0.761157266 | 0.761157266 | -5.58478284  |
| 1460222_at   | 0.022053604  | 8.334975307 | 0.312922206  | 0.761168502 | 0.761168502 | -5.584787406 |
| 1433113_at   | 0.022779739  | 4.331365146 | 0.312888064  | 0.761193639 | 0.761193639 | -5.584797619 |
| 1450092_at   | -0.019688192 | 7.241792876 | -0.312885066 | 0.761195846 | 0.761195846 | -5.584798516 |
| 1442754_at   | -0.027053928 | 3.200969058 | -0.312859245 | 0.761214857 | 0.761214857 | -5.584806239 |
| 1456231_at   | -0.037265359 | 4.847667574 | -0.312841793 | 0.761227705 | 0.761227705 | -5.584811459 |
| 1416330_at   | -0.023167896 | 11.42949717 | -0.312838329 | 0.761230256 | 0.761230256 | -5.584812495 |
| 1449650_at   | -0.024555985 | 3.205740665 | -0.312815659 | 0.761246946 | 0.761246946 | -5.584819274 |
| 1429697_at   | 0.024416003  | 4.158879812 | 0.312796455  | 0.761261086 | 0.761261086 | -5.584825017 |
| 1429484_at   | 0.022511332  | 7.39294426  | 0.312789648  | 0.761266098 | 0.761266098 | -5.584827053 |
| 1457823_at   | -0.097784294 | 8.460076357 | -0.312768731 | 0.761281498 | 0.761281498 | -5.584833307 |
| 1417258_at   | -0.020076238 | 11.9957268  | -0.312720264 | 0.761317183 | 0.761317183 | -5.584847798 |
| 1444404_at   | -0.02768453  | 5.154328579 | -0.312700084 | 0.761332042 | 0.761332042 | -5.584853831 |
| 1431781_at   | 0.025240237  | 5.305407893 | 0.312686747  | 0.761341861 | 0.761341861 | -5.584857818 |
| 1449664_s_at | 0.022283859  | 9.147935133 | 0.312648982  | 0.761369668 | 0.761369668 | -5.584869107 |
| 1454183_at   | -0.022958839 | 4.312606139 | -0.312606055 | 0.761401275 | 0.761401275 | -5.584881937 |
| 1452643_at   | -0.026774481 | 5.414327091 | -0.312603927 | 0.761402841 | 0.761402841 | -5.584882573 |
| 1437674_at   | -0.02610718  | 3.445560802 | -0.312595765 | 0.761408851 | 0.761408851 | -5.584885012 |
| 1423929_at   | -0.025674766 | 8.78787843  | -0.312587603 | 0.761414862 | 0.761414862 | -5.584887451 |
| 1427590_at   | -0.034282628 | 3.712622203 | -0.312579242 | 0.761421018 | 0.761421018 | -5.58488995  |
| 1452667_at   | -0.043203338 | 7.807222692 | -0.312487325 | 0.761488699 | 0.761488699 | -5.584917414 |
| 1422590_at   | -0.019188704 | 6.749253548 | -0.312486792 | 0.761489091 | 0.761489091 | -5.584917573 |

|                 |              |             |              |             |             |              |
|-----------------|--------------|-------------|--------------|-------------|-------------|--------------|
| 1419795_at      | 0.024062371  | 4.433605368 | 0.312418879  | 0.761539099 | 0.761539099 | -5.58493786  |
| 1430441_at      | -0.033935736 | 3.752751912 | -0.312409205 | 0.761546222 | 0.761546222 | -5.584940749 |
| 1429905_at      | -0.020790556 | 3.199860081 | -0.312332502 | 0.761602704 | 0.761602704 | -5.584963656 |
| 1454684_at      | -0.021559652 | 7.587323777 | -0.312311103 | 0.761618462 | 0.761618462 | -5.584970045 |
| 1459700_at      | -0.030731701 | 5.148279055 | -0.312299207 | 0.761627222 | 0.761627222 | -5.584973597 |
| 1424612_at      | 0.025976121  | 7.686345074 | 0.312290792  | 0.761633419 | 0.761633419 | -5.58497611  |
| 1434746_at      | 0.028752559  | 8.564153637 | 0.312275182  | 0.761644914 | 0.761644914 | -5.58498077  |
| 1458942_at      | -0.033919113 | 8.55778387  | -0.312253944 | 0.761660553 | 0.761660553 | -5.58498711  |
| 1423718_at      | -0.024827252 | 8.409057337 | -0.312243205 | 0.761668461 | 0.761668461 | -5.584990316 |
| 1441132_at      | 0.021214201  | 5.00707205  | 0.31223927   | 0.761671359 | 0.761671359 | -5.584991491 |
| 1446260_at      | 0.027609517  | 4.2764271   | 0.312187816  | 0.761709251 | 0.761709251 | -5.58500685  |
| 1419858_at      | -0.034768986 | 3.564748604 | -0.312162388 | 0.761727976 | 0.761727976 | -5.585014439 |
| 1434262_at      | -0.035893193 | 4.199302997 | -0.312122593 | 0.761757282 | 0.761757282 | -5.585026314 |
| 1435508_x_at    | 0.026713932  | 3.246791735 | 0.312095922  | 0.761776924 | 0.761776924 | -5.585034273 |
| 1445289_at      | -0.020200199 | 3.891265003 | -0.312055855 | 0.761806431 | 0.761806431 | -5.585046227 |
| 1434310_at      | 0.025167458  | 10.59575933 | 0.312051844  | 0.761809385 | 0.761809385 | -5.585047424 |
| 1446049_at      | -0.019518041 | 4.614666779 | -0.312012345 | 0.761838474 | 0.761838474 | -5.585059208 |
| 1427691_a_at    | -0.030398465 | 7.857438192 | -0.311989835 | 0.761855051 | 0.761855051 | -5.585065922 |
| 1424043_at      | 0.020512561  | 9.102822988 | 0.311967992  | 0.761871138 | 0.761871138 | -5.585072437 |
| 1442528_at      | 0.034919283  | 6.710908886 | 0.311944595  | 0.76188837  | 0.76188837  | -5.585079416 |
| 1454627_a_at    | 0.020132467  | 13.66445367 | 0.311935418  | 0.761895128 | 0.761895128 | -5.585082152 |
| AFFX-TrpnX-5_at | 0.023634996  | 3.475627051 | 0.311904072  | 0.761918214 | 0.761918214 | -5.5850915   |
| 1437738_at      | -0.022819926 | 8.664869165 | -0.311893177 | 0.761926238 | 0.761926238 | -5.585094749 |
| 1457592_x_at    | -0.024388983 | 4.529942721 | -0.311889003 | 0.761929312 | 0.761929312 | -5.585095994 |
| 1450993_at      | -0.025669446 | 7.138033174 | -0.311847748 | 0.761959696 | 0.761959696 | -5.585108295 |
| 1455194_at      | -0.020085689 | 3.623676028 | -0.311847035 | 0.761960222 | 0.761960222 | -5.585108507 |
| 1438120_x_at    | -0.025076999 | 8.980500386 | -0.311827125 | 0.761974885 | 0.761974885 | -5.585114443 |
| 1422921_at      | 0.021945519  | 4.8511894   | 0.311759434  | 0.762024741 | 0.762024741 | -5.585134622 |
| 1442765_at      | 0.02455096   | 4.003890959 | 0.311745878  | 0.762034725 | 0.762034725 | -5.585138662 |
| 1420954_a_at    | 0.028758359  | 8.359030392 | 0.311743221  | 0.762036682 | 0.762036682 | -5.585139454 |
| 1443172_at      | -0.024614553 | 6.633395433 | -0.311731847 | 0.762045059 | 0.762045059 | -5.585142844 |
| 1451535_at      | 0.032663351  | 5.280435418 | 0.311727277  | 0.762048425 | 0.762048425 | -5.585144206 |
| 1444781_at      | 0.024713011  | 6.948305492 | 0.311716281  | 0.762056524 | 0.762056524 | -5.585147483 |
| 1459768_x_at    | 0.024767291  | 3.597479149 | 0.311688606  | 0.762076908 | 0.762076908 | -5.585155731 |
| 1417979_at      | -0.072689859 | 7.558051196 | -0.311660532 | 0.762097586 | 0.762097586 | -5.585164097 |
| 1446994_at      | -0.037335786 | 3.997656156 | -0.311658349 | 0.762099193 | 0.762099193 | -5.585164747 |
| 1438802_at      | 0.030135399  | 6.426380773 | 0.311654325  | 0.762102157 | 0.762102157 | -5.585165946 |
| 1426648_at      | 0.042967127  | 8.430943914 | 0.3116259    | 0.762123094 | 0.762123094 | -5.585174416 |
| 1442378_x_at    | -0.045894477 | 4.026117946 | -0.311579895 | 0.762156979 | 0.762156979 | -5.585188122 |
| 1419345_at      | -0.02028     | 3.602503724 | -0.311528676 | 0.762194706 | 0.762194706 | -5.585203378 |
| 1439550_at      | -0.024743148 | 8.267390282 | -0.311527404 | 0.762195643 | 0.762195643 | -5.585203757 |
| 1445653_at      | -0.026576656 | 4.574228217 | -0.311524066 | 0.762198102 | 0.762198102 | -5.585204752 |
| 1419657_a_at    | 0.02701707   | 10.47689148 | 0.311394349  | 0.762293651 | 0.762293651 | -5.58524338  |
| 1455409_at      | 0.034498035  | 6.622841476 | 0.311354769  | 0.762322807 | 0.762322807 | -5.585255163 |
| 1445878_at      | 0.053208481  | 5.631449726 | 0.311329323  | 0.762341551 | 0.762341551 | -5.585262738 |
| 1457730_at      | 0.031491489  | 4.066659875 | 0.311257668  | 0.762394335 | 0.762394335 | -5.585284065 |
| 1459572_at      | -0.025986179 | 3.107917264 | -0.311243099 | 0.762405067 | 0.762405067 | -5.5852884   |
| 1422419_s_at    | -0.023862182 | 3.359129224 | -0.311229728 | 0.762414917 | 0.762414917 | -5.585292379 |
| 1427293_a_at    | -0.038322623 | 7.425709322 | -0.311209755 | 0.76242963  | 0.76242963  | -5.585298322 |
| 1420626_at      | 0.02345369   | 9.587137708 | 0.311176236  | 0.762454323 | 0.762454323 | -5.585308296 |
| 1457974_at      | 0.030916059  | 3.734208412 | 0.311148875  | 0.762474478 | 0.762474478 | -5.585316436 |
| 1432398_at      | -0.021692623 | 3.629623236 | -0.311135264 | 0.762484505 | 0.762484505 | -5.585320485 |
| 1452083_a_at    | -0.049458287 | 7.572138278 | -0.311123406 | 0.762493241 | 0.762493241 | -5.585324012 |

|              |              |             |              |             |             |              |
|--------------|--------------|-------------|--------------|-------------|-------------|--------------|
| 1426456_a_at | -0.022829981 | 8.684010452 | -0.311013913 | 0.762573904 | 0.762573904 | -5.585356578 |
| 1460623_at   | 0.038578613  | 6.366160099 | 0.31083869   | 0.762702997 | 0.762702997 | -5.58540867  |
| 1430304_at   | -0.023116602 | 4.069560453 | -0.310837877 | 0.762703595 | 0.762703595 | -5.585408911 |
| 1454525_at   | 0.028111101  | 4.17717247  | 0.310832533  | 0.762707532 | 0.762707532 | -5.5854105   |
| 1425055_at   | 0.030110729  | 5.989768081 | 0.310824309  | 0.762713592 | 0.762713592 | -5.585412944 |
| 1438517_at   | -0.027394878 | 6.032623281 | -0.310804092 | 0.762728487 | 0.762728487 | -5.585418952 |
| 1415796_at   | 0.023674333  | 10.58886669 | 0.310800752  | 0.762730948 | 0.762730948 | -5.585419945 |
| 1445137_at   | 0.040047358  | 7.023191603 | 0.310765566  | 0.762756872 | 0.762756872 | -5.5854304   |
| 1451118_a_at | -0.025347069 | 8.450412578 | -0.310685335 | 0.762815985 | 0.762815985 | -5.585454237 |
| 1424970_at   | -0.019490701 | 10.12158184 | -0.310672149 | 0.7628257   | 0.7628257   | -5.585458154 |
| 1423049_a_at | -0.023231897 | 11.93849463 | -0.310625697 | 0.762859926 | 0.762859926 | -5.585471952 |
| 1431199_at   | -0.03276525  | 4.435102828 | -0.310552304 | 0.762914003 | 0.762914003 | -5.585493748 |
| 1448565_at   | 0.022317858  | 8.846230704 | 0.310516595  | 0.762940314 | 0.762940314 | -5.58550435  |
| 1425035_s_at | -0.032944352 | 4.211153242 | -0.310512091 | 0.762943633 | 0.762943633 | -5.585505688 |
| 1458786_at   | 0.022627017  | 4.061838648 | 0.310509681  | 0.762945409 | 0.762945409 | -5.585506403 |
| 1417355_at   | -0.023901668 | 12.03326051 | -0.310436432 | 0.762999382 | 0.762999382 | -5.585528148 |
| 1435249_at   | 0.021161113  | 9.074975267 | 0.310400866  | 0.763025589 | 0.763025589 | -5.585538705 |
| 1442475_at   | -0.03086599  | 3.389194366 | -0.310395858 | 0.763029279 | 0.763029279 | -5.585540191 |
| 1437494_at   | 0.026710537  | 7.148556348 | 0.310380555  | 0.763040556 | 0.763040556 | -5.585544733 |
| 1458172_at   | 0.02109453   | 6.328434865 | 0.310380443  | 0.763040638 | 0.763040638 | -5.585544766 |
| 1431091_at   | -0.019232739 | 5.034574246 | -0.310366724 | 0.763050748 | 0.763050748 | -5.585548838 |
| 1452152_at   | 0.021650383  | 11.05462378 | 0.310359317  | 0.763056206 | 0.763056206 | -5.585551036 |
| 1460364_at   | -0.033116821 | 7.932537632 | -0.310310173 | 0.763092419 | 0.763092419 | -5.585565619 |
| 1443483_at   | -0.024362006 | 3.477970355 | -0.310268317 | 0.763123262 | 0.763123262 | -5.585578037 |
| 1417724_at   | 0.020919355  | 9.228048568 | 0.310245045  | 0.763140411 | 0.763140411 | -5.585584941 |
| 1460691_at   | -0.028091155 | 8.880005527 | -0.310174454 | 0.76319243  | 0.76319243  | -5.58560588  |
| 1449195_s_at | 0.025549868  | 4.184442786 | 0.31016314   | 0.763200768 | 0.763200768 | -5.585609235 |
| 1443861_at   | 0.027667149  | 4.197868152 | 0.310128547  | 0.76322626  | 0.76322626  | -5.585619494 |
| 1427814_at   | -0.029616178 | 3.347329803 | -0.310097216 | 0.76324935  | 0.76324935  | -5.585628785 |
| 1430302_at   | -0.024027738 | 6.455972147 | -0.310086222 | 0.763257452 | 0.763257452 | -5.585632045 |
| 1442533_at   | 0.033447539  | 3.215464627 | 0.31008526   | 0.763258161 | 0.763258161 | -5.58563233  |
| 1425256_a_at | -0.020675857 | 4.136669545 | -0.310070826 | 0.763268798 | 0.763268798 | -5.585636609 |
| 1458746_at   | -0.04968949  | 5.976777413 | -0.310051342 | 0.763283156 | 0.763283156 | -5.585642386 |
| 1426776_at   | -0.021219664 | 9.032193689 | -0.30999986  | 0.763321096 | 0.763321096 | -5.585657648 |
| 1416614_at   | 0.03447077   | 11.6279569  | 0.309898677  | 0.763395666 | 0.763395666 | -5.585687636 |
| 1430289_a_at | 0.022587607  | 8.150286512 | 0.309886241  | 0.763404832 | 0.763404832 | -5.585691321 |
| 1435898_x_at | 0.020050783  | 12.11633971 | 0.309875019  | 0.763413101 | 0.763413101 | -5.585694646 |
| 1426581_at   | -0.018830001 | 8.82946928  | -0.309856521 | 0.763426735 | 0.763426735 | -5.585700127 |
| 1444093_at   | -0.027014385 | 3.629517877 | -0.309851103 | 0.763430728 | 0.763430728 | -5.585701733 |
| 1441948_x_at | 0.034155214  | 9.252429366 | 0.3098392    | 0.7634395   | 0.7634395   | -5.585705259 |
| 1431178_at   | -0.040499831 | 4.124683318 | -0.309822223 | 0.763452013 | 0.763452013 | -5.585710289 |
| 1434681_at   | 0.029098236  | 6.746222057 | 0.309770582  | 0.763490073 | 0.763490073 | -5.585725587 |
| 1458509_at   | 0.022231838  | 6.771199421 | 0.309757208  | 0.76349993  | 0.76349993  | -5.585729548 |
| 1429730_at   | -0.04681039  | 6.825767613 | -0.309751525 | 0.763504119 | 0.763504119 | -5.585731231 |
| 1437723_s_at | -0.026474978 | 10.69624914 | -0.309705445 | 0.76353808  | 0.76353808  | -5.585744879 |
| 1415867_at   | 0.018939382  | 11.6434577  | 0.309651007  | 0.763578204 | 0.763578204 | -5.585760999 |
| 1448365_at   | 0.022209435  | 9.310802362 | 0.309649394  | 0.763579393 | 0.763579393 | -5.585761477 |
| 1445456_at   | 0.026314074  | 6.461755967 | 0.309608671  | 0.763609408 | 0.763609408 | -5.585773534 |
| 1454021_a_at | -0.028198697 | 9.900483631 | -0.309572027 | 0.763636417 | 0.763636417 | -5.585784382 |
| 1426095_a_at | 0.046957205  | 6.076091552 | 0.309506794  | 0.763684499 | 0.763684499 | -5.585803691 |
| 1435540_at   | -0.02370318  | 8.706284501 | -0.30944476  | 0.763730224 | 0.763730224 | -5.585822049 |
| 1445027_at   | -0.032404339 | 7.341268328 | -0.309417437 | 0.763750364 | 0.763750364 | -5.585830133 |
| 1452816_at   | 0.032346946  | 6.175829693 | 0.309410874  | 0.763755202 | 0.763755202 | -5.585832075 |

|              |              |             |              |             |             |              |
|--------------|--------------|-------------|--------------|-------------|-------------|--------------|
| 1419117_at   | 0.038366563  | 4.013071764 | 0.309401435  | 0.763762159 | 0.763762159 | -5.585834868 |
| 1439769_at   | 0.027779556  | 5.331057374 | 0.309390574  | 0.763770165 | 0.763770165 | -5.585838081 |
| 1436500_at   | -0.0431029   | 5.195436372 | -0.309375158 | 0.763781528 | 0.763781528 | -5.585842642 |
| 1453980_at   | 0.023232775  | 3.557307673 | 0.30936132   | 0.763791729 | 0.763791729 | -5.585846736 |
| 1455805_x_at | 0.03656791   | 6.753284633 | 0.30935881   | 0.763793579 | 0.763793579 | -5.585847478 |
| 1451616_at   | 0.02538393   | 3.780636698 | 0.309350283  | 0.763799864 | 0.763799864 | -5.585850001 |
| 1458557_at   | -0.040421226 | 4.554586403 | -0.309309585 | 0.763829864 | 0.763829864 | -5.585862039 |
| 1448106_at   | -0.018781207 | 8.472963007 | -0.309291358 | 0.7638433   | 0.7638433   | -5.58586743  |
| 1417038_at   | -0.024960685 | 9.789807819 | -0.309280465 | 0.76385133  | 0.76385133  | -5.585870652 |
| 1417286_at   | -0.020204572 | 9.242096767 | -0.309224593 | 0.763892516 | 0.763892516 | -5.585887175 |
| 1427543_s_at | 0.027643384  | 4.413423048 | 0.309203326  | 0.763908193 | 0.763908193 | -5.585893463 |
| 1421501_a_at | 0.025988691  | 6.456681873 | 0.309167108  | 0.763934892 | 0.763934892 | -5.585904171 |
| 1455822_x_at | -0.051194274 | 9.186781414 | -0.309157946 | 0.763941646 | 0.763941646 | -5.58590688  |
| 1418343_at   | -0.020529904 | 8.335623259 | -0.309104694 | 0.763980902 | 0.763980902 | -5.585922622 |
| 1446600_at   | -0.023056725 | 3.709650275 | -0.309099317 | 0.763984866 | 0.763984866 | -5.585924211 |
| 1455371_at   | 0.046135862  | 6.687459429 | 0.309094317  | 0.763988552 | 0.763988552 | -5.585925689 |
| 1442933_at   | -0.024752924 | 7.104633377 | -0.309089583 | 0.763992042 | 0.763992042 | -5.585927088 |
| 1457924_at   | 0.039229573  | 6.001793345 | 0.30908374   | 0.763996349 | 0.763996349 | -5.585928815 |
| 1432896_at   | -0.02308217  | 3.362259408 | -0.309068441 | 0.764007627 | 0.764007627 | -5.585933337 |
| 1432893_at   | 0.03032269   | 4.598357563 | 0.3089894    | 0.764065898 | 0.764065898 | -5.585956695 |
| 1434953_at   | -0.022443234 | 9.2783777   | -0.308955314 | 0.764091026 | 0.764091026 | -5.585966766 |
| 1459067_at   | -0.025824248 | 4.88465907  | -0.308939054 | 0.764103014 | 0.764103014 | -5.58597157  |
| 1417046_at   | 0.021772809  | 8.588491519 | 0.308872387  | 0.764152163 | 0.764152163 | -5.585991264 |
| 1460468_s_at | 0.0264565    | 3.819857613 | 0.308865711  | 0.764157085 | 0.764157085 | -5.585993235 |
| 1435182_at   | -0.02218563  | 7.731445686 | -0.308845091 | 0.764172287 | 0.764172287 | -5.585999326 |
| 1457736_at   | 0.031819607  | 7.397797767 | 0.308729207  | 0.764257724 | 0.764257724 | -5.586033545 |
| 1448633_at   | 0.022304902  | 8.93502603  | 0.308696696  | 0.764281694 | 0.764281694 | -5.586043143 |
| 1436696_x_at | 0.024506164  | 3.195503294 | 0.308682557  | 0.764292119 | 0.764292119 | -5.586047317 |
| 1438829_at   | 0.029923665  | 6.697512407 | 0.308634054  | 0.76432788  | 0.76432788  | -5.586061633 |
| 1451171_at   | 0.022840566  | 7.97598052  | 0.308623219  | 0.764335869 | 0.764335869 | -5.586064831 |
| 1442673_at   | 0.026058545  | 5.423881842 | 0.308620964  | 0.764337532 | 0.764337532 | -5.586065497 |
| 1450403_at   | -0.03408895  | 6.144188378 | -0.30861187  | 0.764344236 | 0.764344236 | -5.586068181 |
| 1457059_at   | -0.02817775  | 5.637663631 | -0.308552142 | 0.764388275 | 0.764388275 | -5.586085806 |
| 1427641_at   | -0.042432273 | 3.874277309 | -0.308532124 | 0.764403035 | 0.764403035 | -5.586091713 |
| 1459221_at   | 0.025548728  | 3.44995807  | 0.308466201  | 0.764451643 | 0.764451643 | -5.586111162 |
| 1449066_a_at | -0.025579972 | 8.927038767 | -0.308455314 | 0.76445967  | 0.76445967  | -5.586114373 |
| 1441839_s_at | 0.0248895    | 4.53325561  | 0.308448419  | 0.764464755 | 0.764464755 | -5.586116407 |
| 1458585_at   | 0.11458334   | 4.881860117 | 0.308351982  | 0.764535864 | 0.764535864 | -5.586144849 |
| 1448783_at   | -0.033930992 | 3.642517649 | -0.308320874 | 0.764558802 | 0.764558802 | -5.586154022 |
| 1438626_x_at | 0.022443353  | 13.22515156 | 0.308293363  | 0.764579088 | 0.764579088 | -5.586162133 |
| 1432420_a_at | 0.031568083  | 5.193899781 | 0.308260451  | 0.764603357 | 0.764603357 | -5.586171836 |
| 1427150_at   | -0.022018602 | 8.997510632 | -0.308258636 | 0.764604696 | 0.764604696 | -5.586172371 |
| 1458556_at   | 0.03095375   | 6.031102969 | 0.308191677  | 0.764654072 | 0.764654072 | -5.586192109 |
| 1435691_at   | -0.024196472 | 6.947255867 | -0.308188896 | 0.764656122 | 0.764656122 | -5.586192928 |
| 1429884_at   | 0.025866528  | 7.13897424  | 0.308135976  | 0.764695147 | 0.764695147 | -5.586208524 |
| 1418494_at   | 0.073335503  | 6.937854288 | 0.308088247  | 0.764730344 | 0.764730344 | -5.586222588 |
| 1419255_at   | 0.029277745  | 9.324169004 | 0.308040333  | 0.764765678 | 0.764765678 | -5.586236704 |
| 1446927_at   | -0.026212774 | 3.516007447 | -0.308014702 | 0.76478458  | 0.76478458  | -5.586244254 |
| 1448341_a_at | 0.02867506   | 7.646789742 | 0.30793122   | 0.764846145 | 0.764846145 | -5.586268842 |
| 1431085_a_at | -0.023491227 | 9.24914801  | -0.307910358 | 0.764861531 | 0.764861531 | -5.586274986 |
| 1441919_x_at | -0.029477858 | 7.844086479 | -0.307898982 | 0.76486992  | 0.76486992  | -5.586278336 |
| 1459474_at   | -0.030163056 | 3.963130104 | -0.307898006 | 0.76487064  | 0.76487064  | -5.586278623 |
| 1445112_at   | -0.027698137 | 5.409320163 | -0.307870392 | 0.764891005 | 0.764891005 | -5.586286754 |

|              |              |             |              |             |             |              |
|--------------|--------------|-------------|--------------|-------------|-------------|--------------|
| 1432949_at   | -0.033001985 | 4.445666131 | -0.307801691 | 0.764941672 | 0.764941672 | -5.586306979 |
| 1435518_at   | 0.020624605  | 10.25725817 | 0.307749189  | 0.764980393 | 0.764980393 | -5.586322433 |
| 1452556_at   | -0.02518117  | 5.907825407 | -0.307749047 | 0.764980498 | 0.764980498 | -5.586322475 |
| 1455429_at   | 0.022810458  | 8.35395985  | 0.307723633  | 0.764999242 | 0.764999242 | -5.586329954 |
| 1456221_at   | -0.024557995 | 4.840113214 | -0.307701199 | 0.765015788 | 0.765015788 | -5.586336557 |
| 1417317_s_at | 0.019448216  | 13.38973432 | 0.307701128  | 0.765015841 | 0.765015841 | -5.586336578 |
| 1445257_at   | 0.030407241  | 3.119154633 | 0.307683507  | 0.765028837 | 0.765028837 | -5.586341763 |
| 1433632_at   | 0.025946436  | 8.689470079 | 0.30767512   | 0.765035022 | 0.765035022 | -5.586344231 |
| 1441565_at   | 0.030691173  | 6.018054718 | 0.307661249  | 0.765045252 | 0.765045252 | -5.586348312 |
| 1452758_s_at | 0.02877951   | 12.44131453 | 0.307593699  | 0.765095075 | 0.765095075 | -5.586368186 |
| 1423876_at   | -0.01977792  | 8.504023198 | -0.307547059 | 0.765129475 | 0.765129475 | -5.586381905 |
| 1422898_s_at | 0.021665837  | 7.006559832 | 0.307521671  | 0.765148201 | 0.765148201 | -5.586389372 |
| 1456614_at   | 0.02665506   | 7.802505832 | 0.307484364  | 0.765175718 | 0.765175718 | -5.586400344 |
| 1437775_at   | -0.029491075 | 8.060366498 | -0.307377966 | 0.765254197 | 0.765254197 | -5.586431627 |
| 1428389_s_at | 0.025835577  | 9.111150682 | 0.307353618  | 0.765272157 | 0.765272157 | -5.586438785 |
| 1432091_a_at | -0.027417475 | 7.390279713 | -0.307334547 | 0.765286224 | 0.765286224 | -5.58644439  |
| 1444195_at   | -0.045591257 | 7.236827678 | -0.307272041 | 0.765332331 | 0.765332331 | -5.586462761 |
| 1441619_at   | 0.026383447  | 5.674646762 | 0.307248123  | 0.765349974 | 0.765349974 | -5.58646979  |
| 1456774_at   | -0.026896172 | 7.221046945 | -0.307196905 | 0.765387756 | 0.765387756 | -5.586484839 |
| 1422387_at   | 0.020934295  | 3.334682893 | 0.307128423  | 0.765438273 | 0.765438273 | -5.586504957 |
| 1422295_at   | 0.028380039  | 6.16558148  | 0.307121768  | 0.765443182 | 0.765443182 | -5.586506912 |
| 1433990_at   | -0.021769142 | 3.713889053 | -0.307108677 | 0.765452839 | 0.765452839 | -5.586510757 |
| 1444317_at   | -0.049105202 | 4.321539465 | -0.307061372 | 0.765487735 | 0.765487735 | -5.58652465  |
| 1430704_at   | 0.029952204  | 4.601162627 | 0.307056169  | 0.765491573 | 0.765491573 | -5.586526178 |
| 1436019_a_at | 0.023326561  | 9.524337954 | 0.30697114   | 0.7655543   | 0.7655543   | -5.586551146 |
| 1435302_at   | 0.032766022  | 6.502161948 | 0.306946736  | 0.765572303 | 0.765572303 | -5.58655831  |
| 1427058_at   | -0.018139652 | 12.60403556 | -0.306926197 | 0.765587456 | 0.765587456 | -5.58656434  |
| 1455128_x_at | -0.019652218 | 9.909634014 | -0.306920318 | 0.765591793 | 0.765591793 | -5.586566065 |
| 1425281_a_at | -0.021270921 | 8.367807056 | -0.306911503 | 0.765598296 | 0.765598296 | -5.586568653 |
| 1421238_a_at | 0.033838029  | 4.551445496 | 0.306870597  | 0.765628474 | 0.765628474 | -5.58658066  |
| 1457360_at   | 0.022832984  | 6.401059689 | 0.306863305  | 0.765633853 | 0.765633853 | -5.5865828   |
| 1429791_at   | 0.024228279  | 4.16325388  | 0.306843425  | 0.76564852  | 0.76564852  | -5.586588634 |
| 1456371_a_at | -0.021636829 | 4.791509001 | -0.306776171 | 0.765698137 | 0.765698137 | -5.586608369 |
| 1447954_at   | 0.029828493  | 3.714657091 | 0.306765146  | 0.765706271 | 0.765706271 | -5.586611604 |
| 1454629_at   | -0.039095145 | 6.514809001 | -0.30675937  | 0.765710533 | 0.765710533 | -5.586613299 |
| 1437019_at   | -0.019693928 | 5.970096724 | -0.306741041 | 0.765724055 | 0.765724055 | -5.586618676 |
| 1420864_at   | 0.022541772  | 6.782633001 | 0.306668758  | 0.765777384 | 0.765777384 | -5.58663988  |
| 1456094_at   | 0.030042839  | 6.315402    | 0.306646935  | 0.765793486 | 0.765793486 | -5.586646281 |
| 1430027_at   | -0.022734441 | 3.5242446   | -0.306551336 | 0.765864019 | 0.765864019 | -5.586674315 |
| 1432777_at   | -0.019762524 | 3.578743974 | -0.306531544 | 0.765878622 | 0.765878622 | -5.586680118 |
| 1451746_a_at | 0.019897742  | 7.361283817 | 0.306495886  | 0.765904932 | 0.765904932 | -5.586690571 |
| 1452126_at   | 0.028615113  | 7.90581778  | 0.306470749  | 0.765923479 | 0.765923479 | -5.58669794  |
| 1420663_at   | 0.025026956  | 6.025496828 | 0.306404256  | 0.765972541 | 0.765972541 | -5.586717428 |
| 1419984_s_at | 0.03705728   | 9.23773461  | 0.306365134  | 0.766001408 | 0.766001408 | -5.586728893 |
| 1418249_at   | 0.021508567  | 8.280937017 | 0.306344349  | 0.766016744 | 0.766016744 | -5.586734983 |
| 1417683_at   | -0.030256929 | 9.074045937 | -0.306337999 | 0.76602143  | 0.76602143  | -5.586736844 |
| 1429784_at   | -0.03125966  | 8.823152482 | -0.306289228 | 0.766057417 | 0.766057417 | -5.586751133 |
| 1446285_at   | -0.028007825 | 5.448482491 | -0.306250398 | 0.76608607  | 0.76608607  | -5.586762507 |
| 1448104_at   | -0.033365775 | 8.293608042 | -0.30621911  | 0.766109157 | 0.766109157 | -5.586771672 |
| 1450102_a_at | -0.020129863 | 9.356699912 | -0.306196869 | 0.766125569 | 0.766125569 | -5.586778186 |
| 1441732_at   | 0.033278084  | 5.313992099 | 0.306105343  | 0.766193108 | 0.766193108 | -5.586804987 |
| 1459285_at   | 0.02869935   | 5.108276767 | 0.306092311  | 0.766202725 | 0.766202725 | -5.586808802 |
| 1426861_at   | -0.029588733 | 7.808769172 | -0.306091219 | 0.766203531 | 0.766203531 | -5.586809122 |



|              |              |             |              |             |             |              |
|--------------|--------------|-------------|--------------|-------------|-------------|--------------|
| 1456498_at   | -0.048024882 | 6.431966276 | -0.306079216 | 0.766212388 | 0.766212388 | -5.586812636 |
| 1439417_at   | -0.023072895 | 3.470615748 | -0.306078927 | 0.766212602 | 0.766212602 | -5.586812721 |
| 1430502_at   | 0.028801699  | 6.605590273 | 0.306065668  | 0.766222386 | 0.766222386 | -5.586816602 |
| 1422639_at   | 0.039799341  | 5.304412325 | 0.306031068  | 0.766247918 | 0.766247918 | -5.586826731 |
| 1415688_at   | 0.019896789  | 10.15478246 | 0.305979729  | 0.766285805 | 0.766285805 | -5.586841757 |
| 1449834_at   | 0.022761007  | 4.807550561 | 0.305969911  | 0.76629305  | 0.76629305  | -5.586844631 |
| 1459975_at   | -0.018290404 | 4.69923177  | -0.305936536 | 0.76631768  | 0.76631768  | -5.586854398 |
| 1443935_at   | -0.029746128 | 7.018482947 | -0.305827375 | 0.766398239 | 0.766398239 | -5.586886335 |
| 1448608_at   | -0.025604329 | 3.755745155 | -0.305819965 | 0.766403708 | 0.766403708 | -5.586888503 |
| 1446353_at   | 0.02744381   | 5.627528952 | 0.305766175  | 0.766443406 | 0.766443406 | -5.586904236 |
| 1456476_at   | -0.042663113 | 7.751991683 | -0.305751846 | 0.766453981 | 0.766453981 | -5.586908427 |
| 1425187_at   | -0.024746097 | 8.76009913  | -0.305628168 | 0.76654526  | 0.76654526  | -5.586944589 |
| 1447283_at   | 0.024805975  | 3.87324512  | 0.305557141  | 0.766597682 | 0.766597682 | -5.586965351 |
| 1431273_at   | -0.031839898 | 5.201565493 | -0.305543691 | 0.766607609 | 0.766607609 | -5.586969282 |
| 1417088_at   | -0.021049342 | 8.465661461 | -0.30549722  | 0.766641909 | 0.766641909 | -5.586982862 |
| 1446861_at   | -0.030756607 | 6.542823385 | -0.305405755 | 0.766709418 | 0.766709418 | -5.587009586 |
| 1416245_at   | -0.032181626 | 10.1884126  | -0.30537588  | 0.766731469 | 0.766731469 | -5.587018313 |
| 1441742_at   | -0.025690343 | 3.147304412 | -0.305354157 | 0.766747504 | 0.766747504 | -5.587024658 |
| 1445786_at   | -0.028727164 | 5.780576127 | -0.305337756 | 0.766759609 | 0.766759609 | -5.587029448 |
| 1416826_a_at | 0.037591591  | 8.960648016 | 0.30532783   | 0.766766936 | 0.766766936 | -5.587032347 |
| 1416487_a_at | -0.041861875 | 8.119695253 | -0.305235479 | 0.766835103 | 0.766835103 | -5.587059315 |
| 1438875_at   | -0.019504998 | 3.057418442 | -0.305227113 | 0.766841279 | 0.766841279 | -5.587061757 |
| 1446311_at   | 0.024256758  | 3.997201706 | 0.305147349  | 0.766900157 | 0.766900157 | -5.587085042 |
| 1437021_at   | -0.023923251 | 7.953687985 | -0.305142597 | 0.766903666 | 0.766903666 | -5.587086429 |
| 1422006_at   | 0.0243983    | 7.182778853 | 0.305136237  | 0.76690836  | 0.76690836  | -5.587088286 |
| 1432704_at   | -0.027151906 | 5.363220958 | -0.305122263 | 0.766918675 | 0.766918675 | -5.587092364 |
| 1421061_at   | 0.025239577  | 4.97182827  | 0.305089522  | 0.766942844 | 0.766942844 | -5.58710192  |
| 1421709_a_at | -0.035252228 | 3.693627335 | -0.305088519 | 0.766943585 | 0.766943585 | -5.587102212 |
| 1425955_at   | -0.02912396  | 4.846432711 | -0.305066459 | 0.766959869 | 0.766959869 | -5.58710865  |
| 1423797_at   | -0.020914901 | 7.215172365 | -0.305027213 | 0.76698884  | 0.76698884  | -5.587120102 |
| 1457373_at   | 0.032535451  | 4.290592969 | 0.305020094  | 0.766994095 | 0.766994095 | -5.587122179 |
| 1441177_at   | 0.028577316  | 6.326090745 | 0.304967135  | 0.76703319  | 0.76703319  | -5.587137629 |
| 1428826_at   | 0.031129251  | 5.062704643 | 0.304952261  | 0.76704417  | 0.76704417  | -5.587141968 |
| 1454145_at   | -0.024329961 | 4.171304089 | -0.304944534 | 0.767049874 | 0.767049874 | -5.587144222 |
| 1453883_at   | 0.029946173  | 3.758818819 | 0.304927118  | 0.767062731 | 0.767062731 | -5.587149302 |
| 1439374_x_at | 0.022939173  | 11.0916204  | 0.30491778   | 0.767069625 | 0.767069625 | -5.587152026 |
| 1433489_s_at | 0.019337025  | 10.72149077 | 0.304917374  | 0.767069925 | 0.767069925 | -5.587152144 |
| 1443174_at   | 0.035696767  | 3.938009036 | 0.304882629  | 0.767095575 | 0.767095575 | -5.587162278 |
| 1416868_at   | 0.028088229  | 7.898830621 | 0.304874882  | 0.767101294 | 0.767101294 | -5.587164537 |
| 1453943_a_at | 0.02616411   | 3.840591826 | 0.304865572  | 0.767108167 | 0.767108167 | -5.587167252 |
| 1451599_at   | 0.021891771  | 6.527653227 | 0.304798658  | 0.767157566 | 0.767157566 | -5.587186764 |
| 1423470_at   | 0.024902946  | 10.45503176 | 0.304797225  | 0.767158624 | 0.767158624 | -5.587187182 |
| 1443161_at   | 0.057898151  | 8.81410673  | 0.304776348  | 0.767174036 | 0.767174036 | -5.587193268 |
| 1428589_at   | 0.019536125  | 9.665765408 | 0.304707912  | 0.767224561 | 0.767224561 | -5.587213218 |
| 1459755_x_at | 0.022701129  | 3.344314582 | 0.304707122  | 0.767225144 | 0.767225144 | -5.587213448 |
| 1450031_at   | -0.019005754 | 10.35731769 | -0.304689711 | 0.767237998 | 0.767237998 | -5.587218523 |
| 1451513_x_at | -0.035084533 | 4.271212657 | -0.3046351   | 0.767278317 | 0.767278317 | -5.587234438 |
| 1433318_at   | 0.028799905  | 3.98780513  | 0.304597003  | 0.767306444 | 0.767306444 | -5.587245539 |
| 1423533_a_at | -0.018242584 | 9.526188175 | -0.304588479 | 0.767312737 | 0.767312737 | -5.587248023 |
| 1448807_at   | 0.018657745  | 5.527729288 | 0.304543091  | 0.767346248 | 0.767346248 | -5.587261247 |
| 1432659_at   | -0.020216291 | 3.469506768 | -0.304500856 | 0.767377431 | 0.767377431 | -5.58727355  |
| 1427779_a_at | 0.032117032  | 4.28445928  | 0.304493815  | 0.76738263  | 0.76738263  | -5.587275601 |
| 1425997_a_at | -0.036629986 | 5.644333975 | -0.304463759 | 0.767404821 | 0.767404821 | -5.587284355 |

|              |              |             |              |             |             |              |
|--------------|--------------|-------------|--------------|-------------|-------------|--------------|
| 1442259_at   | -0.023272965 | 4.579885046 | -0.304427797 | 0.767431373 | 0.767431373 | -5.587294828 |
| 1431842_at   | -0.028510908 | 4.327912418 | -0.304381789 | 0.767465344 | 0.767465344 | -5.587308225 |
| 1439280_at   | 0.022716523  | 3.56356306  | 0.304355132  | 0.767485026 | 0.767485026 | -5.587315987 |
| 1426837_at   | 0.019155847  | 7.753411391 | 0.304345504  | 0.767492135 | 0.767492135 | -5.58731879  |
| 1427930_at   | -0.034897713 | 4.694802703 | -0.304214657 | 0.76758875  | 0.76758875  | -5.587356876 |
| 1423595_at   | -0.027707356 | 6.442483854 | -0.304173977 | 0.767618788 | 0.767618788 | -5.587368714 |
| 1441790_at   | -0.020696558 | 4.608944949 | -0.304159232 | 0.767629676 | 0.767629676 | -5.587373004 |
| 1456983_at   | -0.02500116  | 8.062516723 | -0.304142474 | 0.767642051 | 0.767642051 | -5.58737788  |
| 1460343_at   | -0.027007573 | 6.896532485 | -0.304125672 | 0.767654457 | 0.767654457 | -5.587382768 |
| 1417927_at   | -0.038983594 | 9.277712064 | -0.304069437 | 0.767695983 | 0.767695983 | -5.587399127 |
| 1431483_at   | -0.031661971 | 3.711211612 | -0.30400772  | 0.767741558 | 0.767741558 | -5.587417078 |
| 1436921_at   | 0.021868317  | 9.581703022 | 0.303990767  | 0.767754077 | 0.767754077 | -5.587422008 |
| 1433366_at   | -0.037084479 | 4.411008155 | -0.303982337 | 0.767760302 | 0.767760302 | -5.587424459 |
| 1429386_at   | 0.020565609  | 4.061263442 | 0.303927761  | 0.767800604 | 0.767800604 | -5.587440329 |
| 1437689_x_at | 0.039941235  | 8.544834963 | 0.303886964  | 0.767830732 | 0.767830732 | -5.587452189 |
| 1453136_at   | -0.034836857 | 6.208013102 | -0.30387208  | 0.767841724 | 0.767841724 | -5.587456516 |
| 1423400_at   | -0.027054029 | 3.832048766 | -0.303855849 | 0.76785371  | 0.76785371  | -5.587461234 |
| 1452500_at   | -0.039430831 | 7.995666061 | -0.303852824 | 0.767855944 | 0.767855944 | -5.587462114 |
| 1419084_a_at | 0.026212822  | 4.575767373 | 0.303795907  | 0.767897977 | 0.767897977 | -5.587478657 |
| 1421822_at   | -0.023640888 | 3.787078365 | -0.303765377 | 0.767920523 | 0.767920523 | -5.587487529 |
| 1453725_a_at | 0.020964693  | 9.081729784 | 0.303699827  | 0.767968934 | 0.767968934 | -5.587506575 |
| 1443113_at   | 0.035252795  | 4.536869813 | 0.303643864  | 0.768010264 | 0.768010264 | -5.587522833 |
| 1428251_at   | -0.025324897 | 9.776251158 | -0.303588902 | 0.768050856 | 0.768050856 | -5.587538797 |
| 1457382_at   | 0.022025846  | 3.899338743 | 0.303526116  | 0.768097227 | 0.768097227 | -5.58755703  |
| 1425229_a_at | -0.02616532  | 7.073403838 | -0.303519848 | 0.768101857 | 0.768101857 | -5.58755885  |
| 1439608_at   | 0.019644462  | 3.727357902 | 0.30350944   | 0.768109544 | 0.768109544 | -5.587561872 |
| 1439735_at   | -0.021341438 | 3.345748449 | -0.303392175 | 0.768196154 | 0.768196154 | -5.587595914 |
| 1456542_s_at | 0.047294493  | 8.283918035 | 0.303354118  | 0.768224263 | 0.768224263 | -5.587606959 |
| 1456502_at   | -0.023515994 | 6.760333764 | -0.303299896 | 0.768264313 | 0.768264313 | -5.587622694 |
| 1428917_at   | 0.029102318  | 8.877870166 | 0.303276743  | 0.768281414 | 0.768281414 | -5.587629411 |
| 1437767_s_at | -0.032816175 | 5.991393605 | -0.30319125  | 0.768344563 | 0.768344563 | -5.587654212 |
| 1445405_at   | -0.031254492 | 3.966156434 | -0.303139841 | 0.768382537 | 0.768382537 | -5.587669123 |
| 1440100_at   | -0.039644185 | 5.260983535 | -0.303087721 | 0.768421036 | 0.768421036 | -5.587684237 |
| 1425494_s_at | 0.02767965   | 8.615404312 | 0.303042992  | 0.768454077 | 0.768454077 | -5.587697206 |
| 1449797_x_at | 0.028971588  | 4.917699916 | 0.303036573  | 0.768458818 | 0.768458818 | -5.587699067 |
| 1423628_s_at | -0.025480519 | 10.16632426 | -0.303032679 | 0.768461695 | 0.768461695 | -5.587700195 |
| 1422717_at   | -0.046137987 | 6.570925307 | -0.303024805 | 0.768467511 | 0.768467511 | -5.587702478 |
| 1427809_at   | 0.040518757  | 6.939801191 | 0.302986631  | 0.76849571  | 0.76849571  | -5.587713544 |
| 1419685_at   | -0.034198051 | 6.681132401 | -0.302947916 | 0.76852431  | 0.76852431  | -5.587724766 |
| 1446718_at   | 0.027117554  | 4.174480031 | 0.302864251  | 0.768586115 | 0.768586115 | -5.587749011 |
| 1434827_at   | -0.018409245 | 7.948920011 | -0.302851027 | 0.768595883 | 0.768595883 | -5.587752842 |
| 1452463_x_at | 0.022507653  | 4.009361794 | 0.3027884    | 0.768642149 | 0.768642149 | -5.587770986 |
| 1428442_at   | -0.021804167 | 7.992237028 | -0.302735919 | 0.76868092  | 0.76868092  | -5.587786188 |
| 1452587_at   | 0.019467616  | 11.05098123 | 0.302728464  | 0.768686427 | 0.768686427 | -5.587788347 |
| 1432603_at   | 0.026601366  | 5.203535561 | 0.302685224  | 0.768718371 | 0.768718371 | -5.587800869 |
| 1428613_at   | -0.028291068 | 5.860367281 | -0.302681118 | 0.768721405 | 0.768721405 | -5.587802058 |
| 1459664_at   | 0.024620628  | 4.935704297 | 0.302668984  | 0.768730369 | 0.768730369 | -5.587805572 |
| 1444032_at   | -0.026504399 | 3.306658679 | -0.302641867 | 0.768750402 | 0.768750402 | -5.587813424 |
| 1455385_at   | -0.031591272 | 6.274608791 | -0.302614694 | 0.768770478 | 0.768770478 | -5.587821291 |
| 1455083_at   | 0.026550772  | 8.82309505  | 0.302612471  | 0.76877212  | 0.76877212  | -5.587821935 |
| 1416504_at   | -0.031183779 | 6.836499627 | -0.302593638 | 0.768786034 | 0.768786034 | -5.587827387 |
| 1460215_at   | 0.021978603  | 7.437157557 | 0.302589787  | 0.768788879 | 0.768788879 | -5.587828502 |
| 1439267_x_at | -0.026583456 | 10.61215015 | -0.302583378 | 0.768793614 | 0.768793614 | -5.587830357 |

|              |              |             |              |             |             |              |
|--------------|--------------|-------------|--------------|-------------|-------------|--------------|
| 1420566_at   | 0.028101938  | 4.721224986 | 0.302550651  | 0.768817793 | 0.768817793 | -5.587839831 |
| 1455187_at   | -0.024010847 | 6.711393849 | -0.302509819 | 0.76884796  | 0.76884796  | -5.587851649 |
| 1431744_a_at | -0.044850751 | 6.590933402 | -0.30250808  | 0.768849245 | 0.768849245 | -5.587852152 |
| 1419772_at   | 0.029420627  | 3.610382059 | 0.302468737  | 0.768878312 | 0.768878312 | -5.587863538 |
| 1443411_at   | 0.023429635  | 3.507206926 | 0.302465764  | 0.768880509 | 0.768880509 | -5.587864398 |
| 1425899_a_at | -0.02303371  | 8.655381303 | -0.302442895 | 0.768897405 | 0.768897405 | -5.587871016 |
| 1446900_at   | 0.019733822  | 3.294924407 | 0.302429833  | 0.768907056 | 0.768907056 | -5.587874796 |
| 1417463_a_at | -0.027848802 | 11.17752782 | -0.302423217 | 0.768911944 | 0.768911944 | -5.58787671  |
| 1445714_at   | -0.038171364 | 3.717386563 | -0.302421427 | 0.768913267 | 0.768913267 | -5.587877228 |
| 1433257_at   | 0.025791267  | 3.217409917 | 0.302410286  | 0.768921498 | 0.768921498 | -5.587880451 |
| 1446710_at   | -0.023768292 | 3.400671962 | -0.302388537 | 0.768937567 | 0.768937567 | -5.587886743 |
| 1452920_a_at | 0.022173706  | 9.130207652 | 0.302361556  | 0.768957503 | 0.768957503 | -5.587894549 |
| 1436861_at   | -0.027930232 | 3.939606846 | -0.302360908 | 0.768957981 | 0.768957981 | -5.587894736 |
| 1433239_at   | 0.031027546  | 3.950441723 | 0.302360707  | 0.768958129 | 0.768958129 | -5.587894794 |
| 1442974_at   | -0.037548885 | 3.846864104 | -0.302310132 | 0.768995498 | 0.768995498 | -5.587909424 |
| 1425405_a_at | 0.037890809  | 6.591406558 | 0.302297782  | 0.769004622 | 0.769004622 | -5.587912996 |
| 1424626_at   | 0.020003809  | 3.69862012  | 0.302276562  | 0.769020301 | 0.769020301 | -5.587919133 |
| 1456394_at   | -0.0276381   | 5.975032913 | -0.302261903 | 0.769031133 | 0.769031133 | -5.587923372 |
| 1436160_at   | 0.02588091   | 3.605940814 | 0.302213901  | 0.769066601 | 0.769066601 | -5.587937253 |
| 1423338_at   | 0.019923872  | 8.083431222 | 0.302178152  | 0.769093015 | 0.769093015 | -5.587947588 |
| 1436913_at   | -0.036452464 | 6.28779458  | -0.302141576 | 0.769120041 | 0.769120041 | -5.587958162 |
| 1424299_at   | -0.030575475 | 7.853725092 | -0.302119897 | 0.76913606  | 0.76913606  | -5.587964429 |
| 1417397_at   | -0.031766325 | 7.89919073  | -0.301969737 | 0.769247019 | 0.769247019 | -5.588007823 |
| 1453445_at   | -0.02462075  | 4.575279682 | -0.301862056 | 0.769326591 | 0.769326591 | -5.588038928 |
| 1438170_x_at | -0.023801145 | 8.253225973 | -0.301858814 | 0.769328987 | 0.769328987 | -5.588039864 |
| 1436705_at   | 0.022687725  | 9.473837042 | 0.301827591  | 0.76935206  | 0.76935206  | -5.588048881 |
| 1416995_at   | -0.02719984  | 7.510905686 | -0.301822329 | 0.769355949 | 0.769355949 | -5.588050401 |
| 1448144_at   | 0.029029557  | 9.327428143 | 0.301778827  | 0.769388096 | 0.769388096 | -5.588062962 |
| 1417629_at   | -0.023314151 | 6.207263789 | -0.30172853  | 0.769425266 | 0.769425266 | -5.588077483 |
| 1449162_at   | -0.024563127 | 8.051133035 | -0.301632953 | 0.769495899 | 0.769495899 | -5.588105071 |
| 1431358_at   | -0.02152105  | 6.208555025 | -0.301594787 | 0.769524105 | 0.769524105 | -5.588116085 |
| 1420684_at   | -0.046819456 | 4.543719074 | -0.30153266  | 0.76957002  | 0.76957002  | -5.588134011 |
| 1447026_at   | 0.027124128  | 5.797908347 | 0.301519545  | 0.769579713 | 0.769579713 | -5.588137794 |
| 1442289_at   | -0.022146134 | 4.592468629 | -0.301516891 | 0.769581675 | 0.769581675 | -5.58813856  |
| 1444330_at   | 0.039057772  | 6.321530103 | 0.301396486  | 0.769670663 | 0.769670663 | -5.588173289 |
| 1451145_s_at | -0.022412564 | 9.602753923 | -0.301392292 | 0.769673762 | 0.769673762 | -5.588174498 |
| 1438544_at   | 0.027643919  | 5.164376927 | 0.301361713  | 0.769696363 | 0.769696363 | -5.588183316 |
| 1428356_at   | -0.026057934 | 4.201094187 | -0.301212964 | 0.769806306 | 0.769806306 | -5.588226197 |
| 1450466_at   | -0.023807724 | 5.161393642 | -0.301180623 | 0.769830211 | 0.769830211 | -5.588235517 |
| 1415687_a_at | -0.020052257 | 11.31082576 | -0.301149783 | 0.769853006 | 0.769853006 | -5.588244404 |
| 1416165_at   | 0.019390439  | 9.183887855 | 0.301133346  | 0.769865156 | 0.769865156 | -5.58824914  |
| 1419005_at   | 0.02105316   | 5.736200552 | 0.301126846  | 0.769869961 | 0.769869961 | -5.588251013 |
| 1436089_at   | 0.021187547  | 7.702310491 | 0.301100927  | 0.769889118 | 0.769889118 | -5.58825848  |
| 1443681_at   | 0.021772579  | 6.091333994 | 0.301081032  | 0.769903824 | 0.769903824 | -5.588264212 |
| 1444593_at   | -0.023803013 | 3.688816431 | -0.301050697 | 0.769926247 | 0.769926247 | -5.588272951 |
| 1427906_at   | -0.021578016 | 9.495661524 | -0.301038241 | 0.769935454 | 0.769935454 | -5.588276539 |
| 1460128_at   | -0.021508404 | 3.575268783 | -0.301019904 | 0.769949008 | 0.769949008 | -5.58828182  |
| 1415713_a_at | 0.021561505  | 8.979524892 | 0.300974592  | 0.769982503 | 0.769982503 | -5.58829487  |
| 1434114_at   | 0.024049209  | 8.123644546 | 0.300963996  | 0.769990335 | 0.769990335 | -5.588297922 |
| 1458016_at   | 0.026221311  | 4.409630026 | 0.3009014    | 0.770036607 | 0.770036607 | -5.588315946 |
| 1427924_at   | 0.019911629  | 6.406675187 | 0.300881237  | 0.770051511 | 0.770051511 | -5.588321751 |
| 1458952_at   | -0.025023137 | 5.903528206 | -0.300860053 | 0.770067171 | 0.770067171 | -5.588327849 |
| 1434088_at   | 0.022084244  | 9.019666679 | 0.300851513  | 0.770073484 | 0.770073484 | -5.588330308 |

|              |              |             |              |             |             |              |
|--------------|--------------|-------------|--------------|-------------|-------------|--------------|
| 1444250_at   | -0.026776506 | 3.981511926 | -0.300777236 | 0.770128392 | 0.770128392 | -5.588351687 |
| 1455271_at   | 0.022719968  | 5.993308134 | 0.300771423  | 0.770132689 | 0.770132689 | -5.58835336  |
| 1438249_at   | 0.019765595  | 9.266093    | 0.300731384  | 0.770162288 | 0.770162288 | -5.588364882 |
| 1423080_at   | -0.019499575 | 11.08688955 | -0.300701551 | 0.770184342 | 0.770184342 | -5.588373466 |
| 1436065_at   | -0.023257387 | 3.904729467 | -0.300656749 | 0.770217463 | 0.770217463 | -5.588386356 |
| 1427259_at   | -0.020239041 | 5.87637157  | -0.300649326 | 0.77022295  | 0.77022295  | -5.588388492 |
| 1447972_at   | -0.018408425 | 3.578511426 | -0.300588928 | 0.770267601 | 0.770267601 | -5.588405865 |
| 1437559_at   | 0.030755199  | 6.464490823 | 0.300481998  | 0.770346655 | 0.770346655 | -5.588436615 |
| 1432151_at   | -0.032111311 | 6.572303098 | -0.300447571 | 0.770372107 | 0.770372107 | -5.588446513 |
| 1431994_at   | -0.018530833 | 3.971535678 | -0.300417247 | 0.770394526 | 0.770394526 | -5.58845523  |
| 1440713_at   | 0.033502376  | 4.970998222 | 0.300416543  | 0.770395047 | 0.770395047 | -5.588455432 |
| 1449526_a_at | -0.028348289 | 5.39709521  | -0.300413476 | 0.770397314 | 0.770397314 | -5.588456314 |
| 1439578_at   | 0.08645439   | 7.492165745 | 0.300401818  | 0.770405934 | 0.770405934 | -5.588459665 |
| 1426278_at   | -0.036805647 | 6.087747068 | -0.300362649 | 0.770434892 | 0.770434892 | -5.588470923 |
| 1451431_a_at | -0.02647229  | 7.013175213 | -0.300355816 | 0.770439945 | 0.770439945 | -5.588472887 |
| 1440116_at   | -0.027233857 | 6.970639134 | -0.300330569 | 0.770458611 | 0.770458611 | -5.588480143 |
| 1433453_a_at | 0.052642987  | 8.112315333 | 0.300259093  | 0.770511457 | 0.770511457 | -5.588500681 |
| 1455096_at   | 0.024118543  | 10.45875193 | 0.300227478  | 0.770534833 | 0.770534833 | -5.588509764 |
| 1450812_at   | -0.032545455 | 3.44515388  | -0.300132331 | 0.770605183 | 0.770605183 | -5.588537094 |
| 1420674_at   | 0.029848336  | 3.829408128 | 0.30012148   | 0.770613206 | 0.770613206 | -5.58854021  |
| 1442542_at   | 0.030613745  | 9.03603927  | 0.30006287   | 0.770656543 | 0.770656543 | -5.588557041 |
| 1457064_at   | 0.031331426  | 6.659615095 | 0.299993492  | 0.770707843 | 0.770707843 | -5.588576959 |
| 1439906_at   | -0.045142169 | 5.586966978 | -0.299991743 | 0.770709136 | 0.770709136 | -5.588577461 |
| 1442348_at   | 0.031375419  | 6.985656846 | 0.299987366  | 0.770712373 | 0.770712373 | -5.588578717 |
| 1423267_s_at | -0.038935569 | 7.192880624 | -0.299832141 | 0.770827154 | 0.770827154 | -5.588623265 |
| 1446972_at   | -0.068347668 | 8.091639466 | -0.2997918   | 0.770856985 | 0.770856985 | -5.588634838 |
| 1428608_at   | -0.022894671 | 10.72120563 | -0.299786513 | 0.770860895 | 0.770860895 | -5.588636355 |
| 1430238_at   | -0.024506488 | 4.226512329 | -0.299768871 | 0.770873941 | 0.770873941 | -5.588641416 |
| 1442960_at   | -0.027818567 | 4.799361377 | -0.299747014 | 0.770890104 | 0.770890104 | -5.588647685 |
| 1420570_x_at | -0.021539733 | 9.713999222 | -0.299691399 | 0.770931231 | 0.770931231 | -5.588663636 |
| 1448484_at   | 0.018873893  | 10.59762095 | 0.299686392  | 0.770934934 | 0.770934934 | -5.588665072 |
| 1448190_at   | -0.020904813 | 8.376771605 | -0.299628351 | 0.770977857 | 0.770977857 | -5.588681715 |
| 1426775_s_at | -0.01955388  | 9.142997845 | -0.299593033 | 0.771003975 | 0.771003975 | -5.588691841 |
| 1450060_at   | 0.028354619  | 3.878635262 | 0.299556769  | 0.771030794 | 0.771030794 | -5.588702237 |
| 1431181_a_at | -0.021293275 | 8.993133451 | -0.299541274 | 0.771042252 | 0.771042252 | -5.588706678 |
| 1430645_at   | -0.024627788 | 3.387199329 | -0.299511815 | 0.771064039 | 0.771064039 | -5.588715122 |
| 1444926_at   | 0.023623287  | 3.057597962 | 0.299468426  | 0.771096128 | 0.771096128 | -5.588727557 |
| 1458884_at   | -0.032029689 | 6.232055423 | -0.299464285 | 0.77109919  | 0.77109919  | -5.588728744 |
| 1416520_x_at | 0.020574047  | 12.16080467 | 0.299438831  | 0.771118015 | 0.771118015 | -5.588736038 |
| 1447882_x_at | 0.022864173  | 3.914199839 | 0.29940958   | 0.771139648 | 0.771139648 | -5.588744419 |
| 1424633_at   | 0.028023887  | 7.534960166 | 0.299393137  | 0.771151809 | 0.771151809 | -5.58874913  |
| 1437016_x_at | 0.026030791  | 9.368599472 | 0.299383516  | 0.771158924 | 0.771158924 | -5.588751886 |
| 1420617_at   | 0.029405429  | 7.128373739 | 0.299308362  | 0.771214507 | 0.771214507 | -5.588773415 |
| 1456587_x_at | -0.032111441 | 8.035215096 | -0.299305609 | 0.771216544 | 0.771216544 | -5.588774203 |
| 1453508_at   | -0.025770385 | 3.590539537 | -0.299286381 | 0.771230764 | 0.771230764 | -5.58877971  |
| 1455778_at   | 0.0260884    | 8.82706639  | 0.299273938  | 0.771239967 | 0.771239967 | -5.588783274 |
| 1450889_at   | 0.021355457  | 8.440009717 | 0.299257524  | 0.771252108 | 0.771252108 | -5.588787975 |
| 1420236_at   | -0.027559828 | 4.275270806 | -0.299242161 | 0.77126347  | 0.77126347  | -5.588792374 |
| 1436259_at   | 0.025373183  | 4.123260026 | 0.299212156  | 0.771285663 | 0.771285663 | -5.588800966 |
| 1450579_x_at | -0.021689405 | 5.759575893 | -0.299119677 | 0.771354063 | 0.771354063 | -5.588827442 |
| 1453887_a_at | -0.023123123 | 3.837839502 | -0.299078237 | 0.771384714 | 0.771384714 | -5.588839303 |
| 1432667_at   | -0.032142051 | 3.841712249 | -0.299068451 | 0.771391952 | 0.771391952 | -5.588842104 |
| 1452951_at   | -0.020093322 | 7.552464712 | -0.299039984 | 0.771413008 | 0.771413008 | -5.58885025  |

|              |              |             |              |             |             |              |
|--------------|--------------|-------------|--------------|-------------|-------------|--------------|
| 1416922_a_at | 0.022054363  | 10.56818195 | 0.29900019   | 0.771442443 | 0.771442443 | -5.588861637 |
| 1458681_at   | -0.01834834  | 5.617574161 | -0.298996708 | 0.771445018 | 0.771445018 | -5.588862634 |
| 1443356_at   | 0.01991338   | 4.029234527 | 0.298985122  | 0.771453588 | 0.771453588 | -5.588865949 |
| 1438178_x_at | -0.034595913 | 10.32683473 | -0.298956237 | 0.771474954 | 0.771474954 | -5.588874213 |
| 1450446_a_at | -0.045196042 | 5.827073687 | -0.298936407 | 0.771489621 | 0.771489621 | -5.588879886 |
| 1434179_at   | 0.022758502  | 9.147491542 | 0.298922941  | 0.771499583 | 0.771499583 | -5.588883738 |
| 1430482_at   | 0.023620259  | 3.264270636 | 0.298914945  | 0.771505497 | 0.771505497 | -5.588886026 |
| 1441086_at   | -0.023449558 | 5.03866086  | -0.298866583 | 0.77154127  | 0.77154127  | -5.588899858 |
| 1423942_a_at | -0.025049209 | 8.718176353 | -0.298851728 | 0.771552259 | 0.771552259 | -5.588904107 |
| 1417871_at   | 0.035488869  | 7.643151987 | 0.298789597  | 0.771598218 | 0.771598218 | -5.588921874 |
| 1432182_at   | -0.025788083 | 4.386920748 | -0.298779452 | 0.771605723 | 0.771605723 | -5.588924775 |
| 1445491_at   | -0.036286162 | 5.606194328 | -0.298678248 | 0.771680587 | 0.771680587 | -5.588953707 |
| 1430794_at   | 0.028124533  | 4.332452792 | 0.298676942  | 0.771681553 | 0.771681553 | -5.588954081 |
| 1443287_at   | -0.026332121 | 4.127189989 | -0.298651809 | 0.771700146 | 0.771700146 | -5.588961264 |
| 1449646_s_at | -0.02402237  | 7.581359056 | -0.29858199  | 0.771751795 | 0.771751795 | -5.588981216 |
| 1445098_at   | -0.020327876 | 3.308809711 | -0.298557706 | 0.771769761 | 0.771769761 | -5.588988155 |
| 1440609_at   | -0.023064806 | 8.995554687 | -0.298537748 | 0.771784524 | 0.771784524 | -5.588993857 |
| 1458757_at   | 0.022810858  | 3.341018749 | 0.298508255  | 0.771806343 | 0.771806343 | -5.589002283 |
| 1417425_at   | 0.022065355  | 8.450081075 | 0.298454642  | 0.771846007 | 0.771846007 | -5.589017598 |
| 1445961_at   | 0.01963499   | 5.757533564 | 0.298437299  | 0.771858837 | 0.771858837 | -5.589022551 |
| 1458233_at   | -0.022601474 | 5.874271441 | -0.298370516 | 0.771908244 | 0.771908244 | -5.589041623 |
| 1431239_at   | 0.024323577  | 7.771428977 | 0.298368882  | 0.771909453 | 0.771909453 | -5.589042089 |
| 1433100_at   | -0.034124387 | 6.150592186 | -0.298362973 | 0.771913824 | 0.771913824 | -5.589043776 |
| 1441457_at   | -0.024195135 | 7.200768925 | -0.298321073 | 0.771944823 | 0.771944823 | -5.589055739 |
| 1451953_at   | 0.029806034  | 3.68460724  | 0.298281068  | 0.771974421 | 0.771974421 | -5.58906716  |
| 1433485_x_at | 0.034741475  | 6.235660779 | 0.298255116  | 0.771993621 | 0.771993621 | -5.589074568 |
| 1455948_x_at | -0.028276431 | 3.440662456 | -0.298250364 | 0.771997137 | 0.771997137 | -5.589075924 |
| 1460512_a_at | 0.023156353  | 3.798647132 | 0.298213858  | 0.772024147 | 0.772024147 | -5.589086344 |
| 1435565_at   | -0.023780691 | 6.56757384  | -0.298083832 | 0.77212035  | 0.77212035  | -5.589123445 |
| 1458838_at   | 0.021938009  | 4.530325206 | 0.298079488  | 0.772123564 | 0.772123564 | -5.589124684 |
| 1429066_at   | 0.036837127  | 7.881991363 | 0.298064168  | 0.7721349   | 0.7721349   | -5.589129054 |
| 1436810_x_at | 0.021597734  | 8.067835747 | 0.298054063  | 0.772142377 | 0.772142377 | -5.589131937 |
| 1449978_at   | 0.023648678  | 3.715824066 | 0.298017134  | 0.772169701 | 0.772169701 | -5.58914247  |
| 1443791_at   | 0.023408482  | 3.44028303  | 0.298001435  | 0.772181316 | 0.772181316 | -5.589146947 |
| 1427582_at   | -0.046632967 | 4.567760038 | -0.297858381 | 0.772287167 | 0.772287167 | -5.589187736 |
| 1448611_at   | 0.020276734  | 9.036659457 | 0.297811826  | 0.772321615 | 0.772321615 | -5.589201006 |
| 1438354_x_at | -0.021546497 | 8.479678278 | -0.297791082 | 0.772336965 | 0.772336965 | -5.589206919 |
| 1449314_at   | 0.039068948  | 6.781775364 | 0.297756493  | 0.77236256  | 0.77236256  | -5.589216776 |
| 1425914_a_at | 0.021853711  | 9.748654242 | 0.297750813  | 0.772366763 | 0.772366763 | -5.589218394 |
| 1453288_at   | -0.023558294 | 6.124205767 | -0.297731719 | 0.772380892 | 0.772380892 | -5.589223836 |
| 1455752_a_at | -0.021389464 | 8.570447211 | -0.297725351 | 0.772385604 | 0.772385604 | -5.58922565  |
| 1453544_at   | -0.023474824 | 3.612817003 | -0.297719589 | 0.772389868 | 0.772389868 | -5.589227292 |
| 1438279_at   | 0.023943119  | 4.732515349 | 0.297684738  | 0.772415657 | 0.772415657 | -5.589237221 |
| 1454215_at   | 0.021559965  | 4.371118788 | 0.297681878  | 0.772417774 | 0.772417774 | -5.589238036 |
| 1443142_at   | -0.021263732 | 6.513805407 | -0.297658806 | 0.772434847 | 0.772434847 | -5.589244609 |
| 1443587_at   | 0.022982664  | 4.070141188 | 0.297620002  | 0.772463562 | 0.772463562 | -5.589255663 |
| 1426929_at   | -0.034609938 | 7.210530691 | -0.297615908 | 0.772466592 | 0.772466592 | -5.589256829 |
| 1444641_at   | 0.026187776  | 5.737522571 | 0.297590323  | 0.772485525 | 0.772485525 | -5.589264116 |
| 1450007_at   | 0.02375816   | 8.484706412 | 0.297565011  | 0.772504256 | 0.772504256 | -5.589271325 |
| 1422630_at   | -0.020650087 | 8.152889733 | -0.297555381 | 0.772511383 | 0.772511383 | -5.589274068 |
| 1422547_at   | -0.020244814 | 11.58787448 | -0.297529276 | 0.772530701 | 0.772530701 | -5.589281502 |
| 1445895_at   | -0.033594156 | 4.035549076 | -0.297480443 | 0.772566839 | 0.772566839 | -5.589295406 |
| 1421044_at   | -0.031806451 | 6.397869232 | -0.297424382 | 0.772608327 | 0.772608327 | -5.589311365 |

|              |              |             |              |             |             |              |
|--------------|--------------|-------------|--------------|-------------|-------------|--------------|
| 1424954_a_at | -0.032030688 | 8.359114262 | -0.297419889 | 0.772611652 | 0.772611652 | -5.589312644 |
| 1438505_s_at | 0.039111399  | 9.906043547 | 0.297418892  | 0.77261239  | 0.77261239  | -5.589312928 |
| 1458748_at   | -0.028409909 | 5.293603978 | -0.297391337 | 0.772632783 | 0.772632783 | -5.589320771 |
| 1438956_x_at | 0.022633258  | 4.218701904 | 0.297324572  | 0.772682193 | 0.772682193 | -5.589339772 |
| 1419732_at   | -0.024313954 | 6.756953526 | -0.29729171  | 0.772706514 | 0.772706514 | -5.589349123 |
| 1425418_at   | 0.032014695  | 4.573712286 | 0.29728258   | 0.772713271 | 0.772713271 | -5.589351721 |
| 1445701_at   | 0.018717595  | 5.621465076 | 0.297219836  | 0.772759707 | 0.772759707 | -5.589369571 |
| 1439000_at   | 0.03003902   | 4.411230999 | 0.297216745  | 0.772761995 | 0.772761995 | -5.58937045  |
| 1448697_s_at | -0.019770008 | 11.90125201 | -0.297179772 | 0.772789359 | 0.772789359 | -5.589380967 |
| 1448739_x_at | 0.020758744  | 13.37356294 | 0.297166029  | 0.772799531 | 0.772799531 | -5.589384876 |
| 1439461_x_at | -0.027373172 | 7.346797427 | -0.297144502 | 0.772815463 | 0.772815463 | -5.589390998 |
| 1437192_x_at | -0.018846211 | 11.64646061 | -0.297137674 | 0.772820516 | 0.772820516 | -5.58939294  |
| 1429333_at   | -0.026283335 | 3.321150455 | -0.29710292  | 0.772846239 | 0.772846239 | -5.589402823 |
| 1457193_at   | 0.041366959  | 7.65928803  | 0.297097805  | 0.772850025 | 0.772850025 | -5.589404278 |
| 1434160_at   | -0.024519573 | 7.571299653 | -0.297079872 | 0.772863297 | 0.772863297 | -5.589409377 |
| 1454050_at   | -0.027009231 | 4.064747465 | -0.297050776 | 0.772884833 | 0.772884833 | -5.58941765  |
| 1433261_at   | 0.024627465  | 4.907266085 | 0.297027363  | 0.772902162 | 0.772902162 | -5.589424306 |
| 1421444_at   | 0.025529072  | 3.499487178 | 0.297008914  | 0.772915817 | 0.772915817 | -5.58942955  |
| 1428940_at   | -0.021045114 | 8.264506986 | -0.297005157 | 0.772918597 | 0.772918597 | -5.589430618 |
| 1423389_at   | 0.03606092   | 7.742197428 | 0.296985011  | 0.772933509 | 0.772933509 | -5.589436345 |
| 1425404_a_at | -0.025520219 | 6.78576952  | -0.296979345 | 0.772937702 | 0.772937702 | -5.589437955 |
| 1423711_at   | -0.021689502 | 8.327343149 | -0.296950852 | 0.772958792 | 0.772958792 | -5.589446054 |
| 1451838_a_at | 0.023804945  | 3.146288705 | 0.296942839  | 0.772964723 | 0.772964723 | -5.589448331 |
| 1449611_at   | -0.024403238 | 7.074713483 | -0.29693779  | 0.77296846  | 0.77296846  | -5.589449766 |
| 1416650_at   | 0.022278083  | 3.436411048 | 0.296896574  | 0.772998968 | 0.772998968 | -5.589461479 |
| 1448043_x_at | 0.024925192  | 5.229920613 | 0.296884643  | 0.773007798 | 0.773007798 | -5.589464869 |
| 1448454_at   | -0.018725194 | 12.03998708 | -0.296871361 | 0.77301763  | 0.77301763  | -5.589468643 |
| 1433677_at   | 0.021104317  | 9.290983221 | 0.296869364  | 0.773019108 | 0.773019108 | -5.589469211 |
| 1448466_at   | 0.022293222  | 7.611417592 | 0.296852465  | 0.773031616 | 0.773031616 | -5.589474012 |
| 1458193_at   | -0.019735014 | 4.382307358 | -0.296842944 | 0.773038664 | 0.773038664 | -5.589476717 |
| 1426275_a_at | -0.025958044 | 8.237265782 | -0.296837254 | 0.773042875 | 0.773042875 | -5.589478334 |
| 1437460_x_at | -0.020339791 | 4.273419437 | -0.296826612 | 0.773050753 | 0.773050753 | -5.589481357 |
| 1431519_at   | -0.026290602 | 3.484313752 | -0.296824023 | 0.773052669 | 0.773052669 | -5.589482093 |
| 1459367_at   | -0.022988421 | 3.446404801 | -0.296759876 | 0.773100151 | 0.773100151 | -5.589500315 |
| 1424392_at   | -0.043348422 | 4.270533395 | -0.296755173 | 0.773103632 | 0.773103632 | -5.589501651 |
| 1456675_at   | -0.019404492 | 3.546305772 | -0.29671582  | 0.773132762 | 0.773132762 | -5.589512827 |
| 1422900_at   | -0.022867061 | 9.864011353 | -0.29667136  | 0.773165673 | 0.773165673 | -5.589525453 |
| 1443609_s_at | 0.030115255  | 8.341520278 | 0.296590457  | 0.773225561 | 0.773225561 | -5.589548422 |
| 1421001_a_at | 0.028886354  | 3.908681763 | 0.296588705  | 0.773226858 | 0.773226858 | -5.589548919 |
| 1453096_x_at | 0.030726323  | 11.52024484 | 0.29657526   | 0.773236811 | 0.773236811 | -5.589552736 |
| 1434900_at   | -0.026112926 | 8.038355046 | -0.296567939 | 0.77324223  | 0.77324223  | -5.589554814 |
| 1420387_at   | 0.027756566  | 9.814874579 | 0.296539944  | 0.773262954 | 0.773262954 | -5.58956276  |
| 1452484_at   | -0.028374544 | 4.353521496 | -0.296490784 | 0.773299346 | 0.773299346 | -5.589576712 |
| 1428802_at   | -0.029850568 | 4.245170118 | -0.296467165 | 0.77331683  | 0.77331683  | -5.589583414 |
| 1427597_at   | 0.036691185  | 6.020969706 | 0.29645301   | 0.773327309 | 0.773327309 | -5.589587431 |
| 1458906_at   | -0.054604059 | 6.247342029 | -0.296418705 | 0.773352705 | 0.773352705 | -5.589597165 |
| 1416770_at   | -0.105229991 | 7.861442024 | -0.296320072 | 0.773425724 | 0.773425724 | -5.589625144 |
| 1432635_a_at | -0.020727994 | 5.900157935 | -0.296318277 | 0.773427053 | 0.773427053 | -5.589625653 |
| 1445189_at   | 0.025088038  | 6.190812755 | 0.296256678  | 0.773472656 | 0.773472656 | -5.589643122 |
| 1431844_at   | 0.044290655  | 5.248265569 | 0.296246343  | 0.773480308 | 0.773480308 | -5.589646052 |
| 1423154_at   | 0.02564211   | 5.435349326 | 0.296221319  | 0.773498834 | 0.773498834 | -5.589653147 |
| 1443557_at   | 0.026458011  | 6.673552495 | 0.296207138  | 0.773509333 | 0.773509333 | -5.589657168 |
| 1428178_s_at | -0.032619222 | 9.042227069 | -0.296141867 | 0.773557656 | 0.773557656 | -5.589675671 |

|              |              |             |              |             |             |              |
|--------------|--------------|-------------|--------------|-------------|-------------|--------------|
| 1453924_a_at | 0.026786872  | 6.994693241 | 0.296135443  | 0.773562413 | 0.773562413 | -5.589677492 |
| 1428510_at   | -0.025020589 | 9.671942588 | -0.296060559 | 0.773617855 | 0.773617855 | -5.589698716 |
| 1460399_at   | 0.022991249  | 7.471380515 | 0.296048977  | 0.77362643  | 0.77362643  | -5.589701998 |
| 1443264_at   | -0.028061381 | 3.835863362 | -0.29601693  | 0.773650157 | 0.773650157 | -5.589711078 |
| 1450527_at   | -0.031870312 | 3.995339134 | -0.295965019 | 0.773688592 | 0.773688592 | -5.589725785 |
| 1428061_at   | 0.022364198  | 9.415348992 | 0.295951783  | 0.773698392 | 0.773698392 | -5.589729535 |
| 1451919_a_at | 0.02898496   | 6.409004318 | 0.295878418  | 0.773752713 | 0.773752713 | -5.589750315 |
| 1457973_at   | 0.07218766   | 8.160780208 | 0.295876327  | 0.773754262 | 0.773754262 | -5.589750907 |
| 1451267_at   | 0.019619994  | 8.73656541  | 0.295864466  | 0.773763043 | 0.773763043 | -5.589754266 |
| 1451858_at   | -0.019286368 | 4.405880858 | -0.295801908 | 0.773809364 | 0.773809364 | -5.589771981 |
| 1445160_at   | -0.026304463 | 5.327970857 | -0.29575177  | 0.773846489 | 0.773846489 | -5.589786175 |
| 1442534_at   | -0.019829084 | 3.474911049 | -0.295744479 | 0.773851887 | 0.773851887 | -5.589788239 |
| 1452020_a_at | 0.018486769  | 10.79463283 | 0.295721998  | 0.773868534 | 0.773868534 | -5.589794603 |
| 1454838_s_at | -0.059652684 | 9.821927642 | -0.295698742 | 0.773885754 | 0.773885754 | -5.589801186 |
| 1437008_x_at | -0.031558298 | 10.16864091 | -0.295698206 | 0.773886151 | 0.773886151 | -5.589801337 |
| 1458504_at   | -0.028702061 | 4.150277073 | -0.295637974 | 0.773930751 | 0.773930751 | -5.589818383 |
| 1429142_at   | 0.034025018  | 3.450989281 | 0.295624285  | 0.773940888 | 0.773940888 | -5.589822257 |
| 1446494_at   | -0.031841822 | 4.487573919 | -0.295620727 | 0.773943522 | 0.773943522 | -5.589823264 |
| 1424100_s_at | -0.032906961 | 5.308019211 | -0.295574054 | 0.773978083 | 0.773978083 | -5.58983647  |
| 1448362_at   | 0.018323081  | 10.48306397 | 0.295495662  | 0.774036133 | 0.774036133 | -5.589858646 |
| 1425047_a_at | -0.023588729 | 4.592842613 | -0.295483237 | 0.774045334 | 0.774045334 | -5.58986216  |
| 1438691_at   | -0.032193098 | 7.997476239 | -0.295480175 | 0.774047602 | 0.774047602 | -5.589863026 |
| 1440205_at   | -0.02407053  | 6.654342548 | -0.29546357  | 0.774059898 | 0.774059898 | -5.589867723 |
| 1425835_a_at | -0.022045838 | 7.918077068 | -0.295457886 | 0.774064107 | 0.774064107 | -5.58986933  |
| 1417367_at   | 0.018100191  | 11.9399836  | 0.295418719  | 0.774093112 | 0.774093112 | -5.589880406 |
| 1426993_at   | -0.024052492 | 6.346905315 | -0.295403487 | 0.774104392 | 0.774104392 | -5.589884714 |
| 1437812_x_at | -0.02053186  | 3.684304198 | -0.295394492 | 0.774111053 | 0.774111053 | -5.589887257 |
| 1432805_at   | 0.026742626  | 7.043708661 | 0.295344663  | 0.774147954 | 0.774147954 | -5.589901345 |
| 1437155_a_at | -0.020508357 | 8.608424497 | -0.295324532 | 0.774162862 | 0.774162862 | -5.589907036 |
| 1455468_at   | -0.03786257  | 7.7430552   | -0.295314009 | 0.774170655 | 0.774170655 | -5.589910011 |
| 1432666_at   | 0.031834963  | 3.771442768 | 0.29530198   | 0.774179563 | 0.774179563 | -5.589913411 |
| 1457127_at   | -0.029993151 | 4.256723678 | -0.295289261 | 0.774188982 | 0.774188982 | -5.589917006 |
| 1430595_at   | -0.019679896 | 5.568958099 | -0.295280212 | 0.774195683 | 0.774195683 | -5.589919564 |
| 1453224_at   | -0.022757117 | 6.365255162 | -0.295267231 | 0.774205297 | 0.774205297 | -5.589923233 |
| 1434542_at   | -0.03573091  | 6.330188532 | -0.295212117 | 0.774246114 | 0.774246114 | -5.589938809 |
| 1428911_at   | -0.019103474 | 8.707031293 | -0.29521159  | 0.774246504 | 0.774246504 | -5.589938958 |
| 1420267_at   | 0.019991888  | 3.363287648 | 0.295211323  | 0.774246701 | 0.774246701 | -5.589939033 |
| 1443734_at   | 0.019829334  | 6.089232317 | 0.295206962  | 0.774249931 | 0.774249931 | -5.589940265 |
| 1435218_at   | 0.020749996  | 3.696998525 | 0.295197367  | 0.774257037 | 0.774257037 | -5.589942977 |
| 1456455_at   | -0.025134644 | 3.248135058 | -0.295154511 | 0.774288776 | 0.774288776 | -5.589955086 |
| 1425846_a_at | 0.040493345  | 6.230437721 | 0.295127555  | 0.77430874  | 0.77430874  | -5.589962701 |
| 1425050_at   | 0.019473379  | 10.29211668 | 0.295046325  | 0.7743689   | 0.7743689   | -5.589985646 |
| 1440527_at   | 0.050111763  | 6.421188862 | 0.295006912  | 0.77439809  | 0.77439809  | -5.589996777 |
| 1417561_at   | -0.023171604 | 5.414194212 | -0.294994825 | 0.774407043 | 0.774407043 | -5.59000019  |
| 1433374_at   | 0.043360384  | 5.081815691 | 0.294959616  | 0.77443312  | 0.77443312  | -5.590010132 |
| 1425335_at   | -0.022006011 | 4.700829717 | -0.294931972 | 0.774453594 | 0.774453594 | -5.590017936 |
| 1418475_at   | -0.023737883 | 5.024759352 | -0.294888357 | 0.774485898 | 0.774485898 | -5.590030249 |
| 1423395_at   | -0.020306658 | 10.03608991 | -0.294866186 | 0.774502319 | 0.774502319 | -5.590036507 |
| 1429098_s_at | 0.02234067   | 5.189939595 | 0.294783264  | 0.774563738 | 0.774563738 | -5.590059909 |
| 1435474_at   | 0.026179155  | 8.041336014 | 0.294743724  | 0.774593025 | 0.774593025 | -5.590071066 |
| 1436000_a_at | -0.030163242 | 8.957881185 | -0.294707793 | 0.774619639 | 0.774619639 | -5.590081203 |
| 1430443_at   | 0.01979645   | 3.227372856 | 0.294696397  | 0.774628081 | 0.774628081 | -5.590084418 |
| 1416340_a_at | -0.019731787 | 9.179039054 | -0.29467766  | 0.77464196  | 0.77464196  | -5.590089704 |

|              |              |             |              |             |             |              |
|--------------|--------------|-------------|--------------|-------------|-------------|--------------|
| 1419451_at   | 0.03093273   | 7.88007973  | 0.294677215  | 0.774642289 | 0.774642289 | -5.590089829 |
| 1457076_at   | 0.023162631  | 6.348401451 | 0.294605962  | 0.774695068 | 0.774695068 | -5.590109926 |
| 1453629_at   | -0.020892102 | 4.504418149 | -0.294564537 | 0.774725752 | 0.774725752 | -5.590121608 |
| 1435276_a_at | 0.029761985  | 7.920307848 | 0.294557611  | 0.774730883 | 0.774730883 | -5.590123561 |
| 1448331_at   | 0.020286528  | 9.966725784 | 0.294557574  | 0.774730911 | 0.774730911 | -5.590123571 |
| 1451126_at   | 0.018689463  | 9.252711026 | 0.294550127  | 0.774736427 | 0.774736427 | -5.590125671 |
| 1427936_at   | -0.021451748 | 4.421259395 | -0.29453944  | 0.774744344 | 0.774744344 | -5.590128684 |
| 1437683_x_at | -0.020117182 | 11.37836088 | -0.294530447 | 0.774751004 | 0.774751004 | -5.59013122  |
| 1454850_at   | 0.021554092  | 4.442659679 | 0.294511805  | 0.774764814 | 0.774764814 | -5.590136475 |
| 1417716_at   | 0.027395212  | 9.355432461 | 0.294406713  | 0.774842663 | 0.774842663 | -5.590166099 |
| 1448262_at   | -0.032516526 | 9.926660417 | -0.294362998 | 0.774875046 | 0.774875046 | -5.590178418 |
| 1445753_at   | 0.025016739  | 3.703595475 | 0.294317974  | 0.774908399 | 0.774908399 | -5.590191104 |
| 1419015_at   | 0.027514613  | 5.241943723 | 0.294294625  | 0.774925697 | 0.774925697 | -5.590197682 |
| 1433068_at   | 0.021382661  | 5.778642662 | 0.294265042  | 0.774947612 | 0.774947612 | -5.590206016 |
| 1428844_a_at | -0.023595444 | 9.067317879 | -0.294241051 | 0.774965385 | 0.774965385 | -5.590212774 |
| 1432442_at   | -0.018580669 | 3.969526747 | -0.294168078 | 0.775019445 | 0.775019445 | -5.590233326 |
| 1430230_at   | 0.022727284  | 4.120032894 | 0.294166828  | 0.775020372 | 0.775020372 | -5.590233678 |
| 1453787_at   | 0.045879298  | 6.609334094 | 0.294147738  | 0.775034514 | 0.775034514 | -5.590239054 |
| 1424214_at   | -0.043246843 | 7.482456006 | -0.294141444 | 0.775039177 | 0.775039177 | -5.590240826 |
| 1440405_at   | 0.024306476  | 4.509193912 | 0.294116808  | 0.775057428 | 0.775057428 | -5.590247763 |
| 1451011_at   | 0.024480752  | 7.576547717 | 0.294077325  | 0.77508668  | 0.77508668  | -5.590258879 |
| 1458273_at   | -0.032136041 | 3.931381567 | -0.294030407 | 0.775121439 | 0.775121439 | -5.590272086 |
| 1448657_a_at | -0.019196009 | 8.099091888 | -0.294015279 | 0.775132647 | 0.775132647 | -5.590276344 |
| 1453876_at   | 0.032310353  | 4.1648819   | 0.293991     | 0.775150635 | 0.775150635 | -5.590283177 |
| 1427961_s_at | -0.020858724 | 3.4779128   | -0.293964327 | 0.775170396 | 0.775170396 | -5.590290684 |
| 1434480_at   | -0.023189806 | 7.337415061 | -0.293956991 | 0.775175832 | 0.775175832 | -5.590292748 |
| 1453836_a_at | -0.018859161 | 6.219477767 | -0.293947254 | 0.775183045 | 0.775183045 | -5.590295488 |
| 1446623_at   | -0.030186834 | 3.804083607 | -0.293945778 | 0.77518414  | 0.77518414  | -5.590295904 |
| 1419929_at   | -0.019017977 | 3.794989256 | -0.29393961  | 0.775188709 | 0.775188709 | -5.590297639 |
| 1436707_x_at | 0.023152929  | 9.330749625 | 0.293897379  | 0.775219998 | 0.775219998 | -5.590309522 |
| 1450626_at   | -0.036563858 | 5.739520348 | -0.293885316 | 0.775228935 | 0.775228935 | -5.590312916 |
| 1453221_at   | 0.025300553  | 7.264660541 | 0.293824483  | 0.775274008 | 0.775274008 | -5.590330029 |
| 1439362_at   | -0.027888833 | 3.816251415 | -0.293790098 | 0.775299484 | 0.775299484 | -5.5903397   |
| 1454094_at   | -0.023141426 | 3.602975488 | -0.293661619 | 0.77539468  | 0.77539468  | -5.590375827 |
| 1421640_a_at | -0.022482941 | 7.071858993 | -0.293634508 | 0.775414767 | 0.775414767 | -5.590383448 |
| 1426229_s_at | 0.040217598  | 5.393961146 | 0.293612406  | 0.775431144 | 0.775431144 | -5.590389661 |
| 1416831_at   | -0.030532402 | 6.514478617 | -0.293604439 | 0.775437047 | 0.775437047 | -5.5903919   |
| 1431870_at   | -0.024689012 | 4.074929607 | -0.293570929 | 0.775461877 | 0.775461877 | -5.590401319 |
| 1452481_at   | -0.02645543  | 5.759033523 | -0.293560975 | 0.775469253 | 0.775469253 | -5.590404116 |
| 1443458_at   | 0.02889753   | 5.571688805 | 0.293560487  | 0.775469615 | 0.775469615 | -5.590404254 |
| 1456816_at   | 0.036868522  | 7.466926861 | 0.293558621  | 0.775470998 | 0.775470998 | -5.590404778 |
| 1416460_at   | -0.022943225 | 3.796253429 | -0.293548206 | 0.775478715 | 0.775478715 | -5.590407705 |
| 1444491_at   | 0.021815868  | 4.628806584 | 0.293511915  | 0.775505606 | 0.775505606 | -5.590417903 |
| 1426024_a_at | 0.029639069  | 9.916345366 | 0.293497027  | 0.775516639 | 0.775516639 | -5.590422086 |
| 1442146_at   | -0.026501383 | 6.421908089 | -0.293494235 | 0.775518707 | 0.775518707 | -5.590422871 |
| 1436321_at   | -0.03039772  | 5.237983369 | -0.293465293 | 0.775540153 | 0.775540153 | -5.590431002 |
| 1428498_at   | -0.017616061 | 8.271119575 | -0.293459293 | 0.775544599 | 0.775544599 | -5.590432688 |
| 1431428_a_at | 0.035856473  | 7.408972688 | 0.2934092    | 0.775581718 | 0.775581718 | -5.59044676  |
| 1459228_at   | -0.024213221 | 3.203482936 | -0.293395446 | 0.77559191  | 0.77559191  | -5.590450623 |
| 1439167_at   | 0.038485004  | 4.719427613 | 0.293340241  | 0.775632819 | 0.775632819 | -5.590466128 |
| 1431684_at   | -0.03930179  | 4.431535832 | -0.293336707 | 0.775635438 | 0.775635438 | -5.59046712  |
| 1421864_at   | -0.020763371 | 6.146527877 | -0.293297412 | 0.775664557 | 0.775664557 | -5.590478154 |
| 1429194_at   | 0.02198119   | 7.61538924  | 0.293167082  | 0.77576114  | 0.77576114  | -5.590514742 |



|              |              |             |              |             |             |              |
|--------------|--------------|-------------|--------------|-------------|-------------|--------------|
| 1450386_at   | 0.019741773  | 9.514007552 | 0.293162531  | 0.775764512 | 0.775764512 | -5.590516019 |
| 1427788_at   | -0.027069735 | 3.848326611 | -0.293154938 | 0.775770139 | 0.775770139 | -5.59051815  |
| 1448297_a_at | -0.019676877 | 9.304528796 | -0.293095329 | 0.775814314 | 0.775814314 | -5.590534878 |
| 1443497_at   | -0.023837166 | 4.468960437 | -0.293095212 | 0.775814401 | 0.775814401 | -5.590534911 |
| 1460080_at   | -0.024695242 | 6.012773582 | -0.29309419  | 0.775815159 | 0.775815159 | -5.590535198 |
| 1429985_at   | -0.019808686 | 3.179366586 | -0.293090812 | 0.775817662 | 0.775817662 | -5.590536145 |
| 1436438_s_at | -0.023469983 | 6.845533362 | -0.293080698 | 0.775825157 | 0.775825157 | -5.590538983 |
| 1427212_at   | 0.019612041  | 8.650087487 | 0.293080468  | 0.775825328 | 0.775825328 | -5.590539048 |
| 1440808_x_at | -0.026157515 | 3.814570319 | -0.293070771 | 0.775832514 | 0.775832514 | -5.590541768 |
| 1424091_at   | 0.039856595  | 8.268668928 | 0.293026754  | 0.775865136 | 0.775865136 | -5.590554118 |
| 1434452_x_at | -0.069522656 | 7.702240913 | -0.293025008 | 0.775866429 | 0.775866429 | -5.590554608 |
| 1456141_x_at | 0.021203335  | 4.227052932 | 0.293009933  | 0.775877601 | 0.775877601 | -5.590558836 |
| 1417544_a_at | -0.034788289 | 8.221949517 | -0.293003855 | 0.775882106 | 0.775882106 | -5.590560542 |
| 1423728_at   | 0.019037715  | 11.26321785 | 0.293000566  | 0.775884544 | 0.775884544 | -5.590561464 |
| 1460209_at   | 0.020098291  | 9.000411946 | 0.292977455  | 0.775901672 | 0.775901672 | -5.590567947 |
| 1446631_at   | -0.035169511 | 3.281917576 | -0.292966429 | 0.775909843 | 0.775909843 | -5.590571039 |
| 1426504_a_at | -0.020982865 | 8.16249632  | -0.292956904 | 0.775916902 | 0.775916902 | -5.590573711 |
| 1422222_at   | -0.042524436 | 4.246403219 | -0.292820969 | 0.77601765  | 0.77601765  | -5.590611828 |
| 1452872_at   | 0.030340407  | 5.945987643 | 0.292813754  | 0.776022997 | 0.776022997 | -5.59061385  |
| 1440467_at   | -0.025080178 | 5.342528491 | -0.292809263 | 0.776026325 | 0.776026325 | -5.590615109 |
| 1443884_at   | 0.019802629  | 5.584039111 | 0.292756031  | 0.776065779 | 0.776065779 | -5.59063003  |
| 1447123_at   | -0.022205737 | 3.523579334 | -0.292749627 | 0.776070526 | 0.776070526 | -5.590631825 |
| 1432500_at   | 0.03143673   | 3.430661341 | 0.292686736  | 0.776117139 | 0.776117139 | -5.59064945  |
| 1456594_at   | -0.034374207 | 4.27107663  | -0.292628241 | 0.776160495 | 0.776160495 | -5.59066584  |
| 1450087_a_at | 0.028190045  | 7.754389308 | 0.292582093  | 0.776194701 | 0.776194701 | -5.590678768 |
| 1426855_at   | -0.02706189  | 8.796450401 | -0.292556957 | 0.776213332 | 0.776213332 | -5.590685809 |
| 1426073_at   | 0.019400424  | 4.205845456 | 0.292541079  | 0.776225101 | 0.776225101 | -5.590690256 |
| 1423644_at   | -0.021777918 | 8.579654028 | -0.292504855 | 0.776251952 | 0.776251952 | -5.590700401 |
| 1437250_at   | -0.026340212 | 5.21564373  | -0.292445044 | 0.776296286 | 0.776296286 | -5.590717149 |
| 1457746_at   | 0.026617613  | 7.29669671  | 0.292428988  | 0.776308188 | 0.776308188 | -5.590721644 |
| 1417430_at   | -0.021161284 | 8.397280459 | -0.292403605 | 0.776327003 | 0.776327003 | -5.59072875  |
| 1438448_at   | 0.020598522  | 3.509398543 | 0.292395606  | 0.776332932 | 0.776332932 | -5.59073099  |
| 1430624_at   | -0.022245262 | 3.640368489 | -0.29239126  | 0.776336153 | 0.776336153 | -5.590732206 |
| 1422689_at   | -0.020750191 | 3.314277805 | -0.292384874 | 0.776340888 | 0.776340888 | -5.590733994 |
| 1454252_at   | 0.036542174  | 4.286403014 | 0.292318553  | 0.776390049 | 0.776390049 | -5.590752557 |
| 1417076_at   | 0.024003543  | 3.725398682 | 0.292267529  | 0.776427872 | 0.776427872 | -5.590766836 |
| 1435184_at   | 0.080511638  | 7.54609568  | 0.29225367   | 0.776438145 | 0.776438145 | -5.590770714 |
| 1426601_at   | 0.041419626  | 5.852804617 | 0.29224065   | 0.776447797 | 0.776447797 | -5.590774357 |
| 1446628_at   | 0.029039768  | 4.647147117 | 0.292232703  | 0.776453689 | 0.776453689 | -5.590776581 |
| 1449855_s_at | 0.02153342   | 9.394107182 | 0.292225558  | 0.776458985 | 0.776458985 | -5.59077858  |
| 1430207_at   | 0.023272129  | 3.838707837 | 0.292164544  | 0.776504215 | 0.776504215 | -5.590795649 |
| 1432458_at   | -0.025577088 | 3.526585369 | -0.292099518 | 0.77655242  | 0.77655242  | -5.590813836 |
| 1438437_a_at | -0.024699613 | 8.341680726 | -0.292083342 | 0.776564412 | 0.776564412 | -5.59081836  |
| 1451593_at   | -0.028974511 | 6.409539931 | -0.292034131 | 0.776600894 | 0.776600894 | -5.590832121 |
| 1457879_at   | 0.027561343  | 4.172663986 | 0.291880231  | 0.77671499  | 0.77671499  | -5.590875141 |
| 1419701_s_at | 0.020174389  | 7.687409389 | 0.291858028  | 0.776731451 | 0.776731451 | -5.590881345 |
| 1439989_at   | 0.025062756  | 5.763443682 | 0.291824729  | 0.776756138 | 0.776756138 | -5.59089065  |
| 1425062_at   | 0.020874618  | 4.561207697 | 0.29181323   | 0.776764664 | 0.776764664 | -5.590893862 |
| 1456111_at   | 0.045644197  | 7.404956242 | 0.291793973  | 0.776778941 | 0.776778941 | -5.590899243 |
| 1448854_s_at | -0.025705416 | 3.397386515 | -0.291652571 | 0.776883779 | 0.776883779 | -5.590938738 |
| 1434248_at   | 0.022428693  | 8.302050921 | 0.291623511  | 0.776905325 | 0.776905325 | -5.590946852 |
| 1439388_s_at | -0.031514125 | 8.591135954 | -0.291607266 | 0.77691737  | 0.77691737  | -5.590951388 |
| 1442194_at   | -0.032817604 | 6.87948198  | -0.29154549  | 0.776963174 | 0.776963174 | -5.590968634 |

|              |              |             |              |             |             |              |
|--------------|--------------|-------------|--------------|-------------|-------------|--------------|
| 1440696_at   | 0.024775055  | 5.252201436 | 0.291535552  | 0.776970543 | 0.776970543 | -5.590971408 |
| 1438569_at   | -0.025285635 | 3.462948303 | -0.291479363 | 0.777012205 | 0.777012205 | -5.590987091 |
| 1434934_at   | -0.019849245 | 8.250847068 | -0.291456118 | 0.777029441 | 0.777029441 | -5.590993578 |
| 1420889_at   | 0.022463311  | 7.757495408 | 0.291411048  | 0.77706286  | 0.77706286  | -5.591006155 |
| 1452584_at   | 0.020907704  | 10.58161464 | 0.29138906   | 0.777079163 | 0.777079163 | -5.59101229  |
| 1440806_x_at | 0.02278526   | 3.167456651 | 0.291364731  | 0.777097203 | 0.777097203 | -5.591019077 |
| 1452303_at   | 0.032813701  | 7.696680439 | 0.291338024  | 0.777117007 | 0.777117007 | -5.591026527 |
| 1430832_at   | -0.031198761 | 4.582948734 | -0.291269793 | 0.777167602 | 0.777167602 | -5.591045558 |
| 1422111_at   | -0.03918476  | 4.890218353 | -0.291266187 | 0.777170275 | 0.777170275 | -5.591046564 |
| 1434470_at   | -0.029652054 | 4.535810118 | -0.291251358 | 0.777181271 | 0.777181271 | -5.591050699 |
| 1442090_at   | -0.022247146 | 4.466052429 | -0.291227566 | 0.777198914 | 0.777198914 | -5.591057334 |
| 1458659_at   | 0.044951541  | 4.10040054  | 0.291191206  | 0.777225876 | 0.777225876 | -5.591067472 |
| 1445358_at   | 0.023814466  | 4.760223753 | 0.291177026  | 0.777236392 | 0.777236392 | -5.591071426 |
| 1440162_x_at | -0.029158793 | 7.695637481 | -0.291160841 | 0.777248393 | 0.777248393 | -5.591075938 |
| 1440700_a_at | 0.025953973  | 6.460475127 | 0.291120502  | 0.777278307 | 0.777278307 | -5.591087183 |
| 1447430_at   | 0.021065024  | 3.794479137 | 0.291112471  | 0.777284263 | 0.777284263 | -5.591089422 |
| 1457415_a_at | -0.02990097  | 4.429389606 | -0.291111366 | 0.777285082 | 0.777285082 | -5.59108973  |
| 1424843_a_at | 0.021499741  | 10.14006987 | 0.291106327  | 0.777288819 | 0.777288819 | -5.591091134 |
| 1416197_at   | -0.019772252 | 10.65456465 | -0.291094848 | 0.777297332 | 0.777297332 | -5.591094334 |
| 1418485_at   | -0.021878541 | 8.032810995 | -0.291091529 | 0.777299793 | 0.777299793 | -5.591095259 |
| 1460600_at   | -0.027943779 | 5.793018009 | -0.291090524 | 0.777300538 | 0.777300538 | -5.591095539 |
| 1454459_at   | -0.039125553 | 4.707356285 | -0.291082528 | 0.777306467 | 0.777306467 | -5.591097767 |
| 1428511_at   | 0.020024278  | 8.121102382 | 0.29105199   | 0.777329113 | 0.777329113 | -5.591106278 |
| 1441371_at   | 0.020064575  | 6.139966094 | 0.290969198  | 0.777390511 | 0.777390511 | -5.591129348 |
| 1423155_at   | 0.0230268    | 8.161177727 | 0.290960525  | 0.777396943 | 0.777396943 | -5.591131764 |
| 1424165_a_at | 0.021173847  | 7.852561293 | 0.290904936  | 0.777438168 | 0.777438168 | -5.591147249 |
| 1437993_x_at | 0.022817644  | 11.065069   | 0.290893256  | 0.77744683  | 0.77744683  | -5.591150503 |
| 1432430_a_at | 0.019276238  | 7.119236191 | 0.290856515  | 0.777474078 | 0.777474078 | -5.591160736 |
| 1447168_at   | -0.022512937 | 4.991168664 | -0.290844521 | 0.777482973 | 0.777482973 | -5.591164076 |
| 1417972_s_at | -0.023291369 | 8.553353343 | -0.290818749 | 0.777502087 | 0.777502087 | -5.591171253 |
| 1456312_x_at | 0.074506033  | 10.94549898 | 0.290813934  | 0.777505658 | 0.777505658 | -5.591172594 |
| 1418995_at   | -0.021525131 | 6.406282047 | -0.290804278 | 0.777512818 | 0.777512818 | -5.591175282 |
| 1442600_at   | 0.020160813  | 5.11242008  | 0.290797789  | 0.777517631 | 0.777517631 | -5.591177089 |
| 1425318_a_at | -0.03526025  | 4.012532382 | -0.290777882 | 0.777532395 | 0.777532395 | -5.591182632 |
| 1447599_x_at | -0.029362342 | 6.820272724 | -0.290774314 | 0.777535041 | 0.777535041 | -5.591183626 |
| 1430727_at   | 0.020843278  | 3.575476479 | 0.290727079  | 0.777570073 | 0.777570073 | -5.591196776 |
| 1445640_at   | 0.029216754  | 5.50854637  | 0.290722027  | 0.777573819 | 0.777573819 | -5.591198182 |
| 1428797_at   | -0.043926405 | 6.762264186 | -0.290712517 | 0.777580873 | 0.777580873 | -5.591200829 |
| 1444680_at   | 0.035306429  | 3.912104419 | 0.290698006  | 0.777591635 | 0.777591635 | -5.591204869 |
| 1457336_at   | 0.080309825  | 6.234950375 | 0.290683916  | 0.777602085 | 0.777602085 | -5.59120879  |
| 1439227_at   | -0.026985184 | 7.413012726 | -0.290670781 | 0.777611827 | 0.777611827 | -5.591212446 |
| 1436600_at   | -0.029694642 | 7.135930049 | -0.290648571 | 0.777628299 | 0.777628299 | -5.591218627 |
| 1420992_at   | -0.04013485  | 5.018745095 | -0.290627625 | 0.777643834 | 0.777643834 | -5.591224457 |
| 1435303_at   | -0.02614832  | 7.422327378 | -0.290591645 | 0.77767052  | 0.77767052  | -5.591234469 |
| 1423006_at   | 0.024704806  | 5.563760921 | 0.29058561   | 0.777674996 | 0.777674996 | -5.591236148 |
| 1445009_at   | -0.027819429 | 6.055318082 | -0.290578853 | 0.777680008 | 0.777680008 | -5.591238028 |
| 1457776_at   | -0.024244078 | 4.356251663 | -0.290571765 | 0.777685265 | 0.777685265 | -5.59124     |
| 1424631_a_at | 0.024132688  | 3.898220491 | 0.290565503  | 0.777689909 | 0.777689909 | -5.591241742 |
| 1444470_x_at | -0.024799324 | 5.180844559 | -0.290528626 | 0.777717261 | 0.777717261 | -5.591252002 |
| 1436688_x_at | 0.021278665  | 12.81181641 | 0.290491338  | 0.777744918 | 0.777744918 | -5.591262374 |
| 1455177_at   | 0.021394697  | 7.99311279  | 0.290489588  | 0.777746216 | 0.777746216 | -5.591262861 |
| 1428794_at   | -0.024701167 | 7.268385957 | -0.290483212 | 0.777750945 | 0.777750945 | -5.591264635 |
| 1460598_at   | 0.02459308   | 5.575973559 | 0.290471551  | 0.777759594 | 0.777759594 | -5.591267878 |

|              |              |             |              |             |             |              |
|--------------|--------------|-------------|--------------|-------------|-------------|--------------|
| 1430190_at   | -0.028346185 | 5.561736966 | -0.290428182 | 0.777791762 | 0.777791762 | -5.59127994  |
| 1450814_a_at | -0.024983485 | 9.120483128 | -0.290425959 | 0.777793411 | 0.777793411 | -5.591280558 |
| 1459642_at   | -0.026137205 | 4.133644755 | -0.290420322 | 0.777797591 | 0.777797591 | -5.591282125 |
| 1440326_at   | 0.023287811  | 3.505090459 | 0.290360171  | 0.777842207 | 0.777842207 | -5.591298851 |
| 1427667_s_at | 0.019288355  | 3.19164855  | 0.290292928  | 0.777892085 | 0.777892085 | -5.591317545 |
| 1441665_at   | 0.023308068  | 5.806241691 | 0.290277096  | 0.777903829 | 0.777903829 | -5.591321946 |
| 1428518_at   | 0.019567543  | 7.39738075  | 0.290256357  | 0.777919212 | 0.777919212 | -5.59132771  |
| 1451471_at   | -0.023979873 | 6.920707131 | -0.290246211 | 0.777926738 | 0.777926738 | -5.59133053  |
| 1442842_at   | 0.021283914  | 4.625851572 | 0.290233602  | 0.777936091 | 0.777936091 | -5.591334034 |
| 1438329_at   | -0.021434682 | 4.694287187 | -0.290230753 | 0.777938204 | 0.777938204 | -5.591334826 |
| 1435590_at   | -0.033886531 | 6.628583236 | -0.290222565 | 0.777944278 | 0.777944278 | -5.591337102 |
| 1435283_s_at | 0.026452405  | 6.179824189 | 0.290207303  | 0.777955599 | 0.777955599 | -5.591341343 |
| 1428596_at   | -0.031753265 | 9.023212258 | -0.290149415 | 0.777998539 | 0.777998539 | -5.591357427 |
| 1434883_at   | 0.018857251  | 8.801534044 | 0.290135805  | 0.778008635 | 0.778008635 | -5.591361209 |
| 1455063_at   | 0.028358359  | 5.643835701 | 0.289908352  | 0.778177364 | 0.778177364 | -5.591424376 |
| 1459857_at   | -0.026115789 | 7.835406605 | -0.289900572 | 0.778183136 | 0.778183136 | -5.591426536 |
| 1426675_at   | 0.035230503  | 9.56492564  | 0.289842909  | 0.778225913 | 0.778225913 | -5.591442542 |
| 1435041_at   | 0.02155453   | 8.196287839 | 0.289822896  | 0.778240761 | 0.778240761 | -5.591448096 |
| 1423023_at   | -0.02836558  | 5.611492072 | -0.289822276 | 0.77824122  | 0.77824122  | -5.591448268 |
| 1430753_at   | 0.042302101  | 5.190695962 | 0.28978008   | 0.778272524 | 0.778272524 | -5.591459978 |
| 1446624_at   | -0.048898664 | 5.84972058  | -0.289758665 | 0.778288412 | 0.778288412 | -5.59146592  |
| 1417412_at   | 0.02157794   | 5.582971928 | 0.28970355   | 0.778329301 | 0.778329301 | -5.591481211 |
| 1429417_at   | 0.028407594  | 4.562119703 | 0.289684082  | 0.778343745 | 0.778343745 | -5.591486612 |
| 1417053_at   | -0.021521124 | 9.928891395 | -0.289669966 | 0.778354217 | 0.778354217 | -5.591490527 |
| 1435222_at   | 0.032183872  | 9.666935628 | 0.28961068   | 0.778398202 | 0.778398202 | -5.591506971 |
| 1453676_at   | 0.022322677  | 4.907306806 | 0.289535722  | 0.778453815 | 0.778453815 | -5.591527756 |
| 1416884_at   | -0.023835997 | 11.66659614 | -0.289532836 | 0.778455957 | 0.778455957 | -5.591528557 |
| 1430771_a_at | 0.01909974   | 5.61480562  | 0.289531171  | 0.778457192 | 0.778457192 | -5.591529018 |
| 1435108_at   | -0.021775892 | 5.805798342 | -0.289520592 | 0.778465041 | 0.778465041 | -5.591531951 |
| 1422032_a_at | 0.019939561  | 11.07260146 | 0.289489131  | 0.778488383 | 0.778488383 | -5.591540673 |
| 1458362_at   | 0.027833078  | 3.897564508 | 0.289454408  | 0.778514146 | 0.778514146 | -5.591550298 |
| 1443741_x_at | 0.03084902   | 4.328529034 | 0.289448688  | 0.77851839  | 0.77851839  | -5.591551884 |
| 1444800_at   | 0.022868581  | 3.788436886 | 0.289422489  | 0.778537829 | 0.778537829 | -5.591559145 |
| 1449394_at   | -0.028595741 | 3.591728853 | -0.289343646 | 0.778596328 | 0.778596328 | -5.591580994 |
| 1431388_at   | 0.054131286  | 5.232795794 | 0.289340045  | 0.778599    | 0.778599    | -5.591581992 |
| 1432231_at   | -0.024566328 | 3.792603956 | -0.289325051 | 0.778610125 | 0.778610125 | -5.591586146 |
| 1433306_at   | -0.024152002 | 4.38007169  | -0.289173959 | 0.778722235 | 0.778722235 | -5.591627997 |
| 1444191_at   | 0.035876987  | 6.424180956 | 0.289044278  | 0.778818464 | 0.778818464 | -5.5916639   |
| 1438905_x_at | -0.026350701 | 6.542963881 | -0.288946214 | 0.778891234 | 0.778891234 | -5.59169104  |
| 1430542_a_at | 0.024396621  | 11.54246442 | 0.288892325  | 0.778931223 | 0.778931223 | -5.59170595  |
| 1436608_at   | 0.032372699  | 5.863722959 | 0.28887115   | 0.778946937 | 0.778946937 | -5.591711808 |
| 1437233_x_at | 0.020254759  | 4.595362484 | 0.288840959  | 0.778969342 | 0.778969342 | -5.591720159 |
| 1446974_at   | 0.026376451  | 5.304579421 | 0.288834298  | 0.778974285 | 0.778974285 | -5.591722002 |
| 1454682_at   | 0.025497666  | 8.630544266 | 0.288791385  | 0.779006131 | 0.779006131 | -5.591733871 |
| 1439378_at   | 0.018688044  | 3.148102418 | 0.288656253  | 0.779106416 | 0.779106416 | -5.591771234 |
| 1454949_at   | -0.023244007 | 7.074733902 | -0.288647066 | 0.779113234 | 0.779113234 | -5.591773774 |
| 1446514_at   | -0.039097664 | 3.791399049 | -0.288643467 | 0.779115905 | 0.779115905 | -5.591774769 |
| 1459913_at   | 0.02676393   | 4.336341452 | 0.288561958  | 0.779176397 | 0.779176397 | -5.591797296 |
| 1430752_at   | 0.040543121  | 7.62744998  | 0.288381708  | 0.779310176 | 0.779310176 | -5.591847092 |
| 1427804_at   | 0.038121077  | 4.238555361 | 0.288351492  | 0.779332603 | 0.779332603 | -5.591855437 |
| 1458856_at   | -0.031042929 | 6.378571728 | -0.288334977 | 0.77934486  | 0.77934486  | -5.591859997 |
| 1443755_at   | -0.074817321 | 6.552701929 | -0.288328533 | 0.779349643 | 0.779349643 | -5.591861777 |
| 1429290_at   | -0.033580553 | 9.737881329 | -0.288285067 | 0.779381905 | 0.779381905 | -5.591873778 |

|              |              |             |              |             |             |              |
|--------------|--------------|-------------|--------------|-------------|-------------|--------------|
| 1453047_at   | -0.028908099 | 5.186516369 | -0.288243332 | 0.779412882 | 0.779412882 | -5.5918853   |
| 1447233_at   | 0.022851159  | 5.879180675 | 0.288235447  | 0.779418735 | 0.779418735 | -5.591887476 |
| 1427436_at   | -0.041352527 | 9.240470188 | -0.288120877 | 0.779503775 | 0.779503775 | -5.591919096 |
| 1433692_at   | 0.023311524  | 8.109900309 | 0.288095388  | 0.779522695 | 0.779522695 | -5.591926129 |
| 1419634_a_at | 0.02383991   | 4.326836606 | 0.28805225   | 0.779554715 | 0.779554715 | -5.59193803  |
| 1422906_at   | 0.019946962  | 9.062274817 | 0.288029148  | 0.779571863 | 0.779571863 | -5.591944403 |
| 1422849_a_at | -0.017756195 | 13.47856187 | -0.28802341  | 0.779576122 | 0.779576122 | -5.591945985 |
| 1443069_at   | 0.032558891  | 5.614450295 | 0.288022301  | 0.779576945 | 0.779576945 | -5.591946291 |
| 1443162_at   | 0.025789614  | 4.178905905 | 0.287985083  | 0.779604572 | 0.779604572 | -5.591956557 |
| 1425018_at   | -0.020959966 | 10.10088576 | -0.287964667 | 0.779619727 | 0.779619727 | -5.591962187 |
| 1440328_at   | -0.019522988 | 5.166464862 | -0.28794705  | 0.779632805 | 0.779632805 | -5.591967046 |
| 1450234_at   | 0.047440888  | 7.612868353 | 0.287879894  | 0.779682655 | 0.779682655 | -5.591985563 |
| 1422421_at   | 0.027085038  | 6.521967812 | 0.287830999  | 0.779718952 | 0.779718952 | -5.591999043 |
| 1454718_at   | -0.02285302  | 7.314511315 | -0.287807336 | 0.779736518 | 0.779736518 | -5.592005565 |
| 1435779_at   | 0.020903323  | 8.105726156 | 0.287794361  | 0.779746149 | 0.779746149 | -5.592009142 |
| 1452509_at   | 0.021942362  | 3.71186175  | 0.287681876  | 0.779829653 | 0.779829653 | -5.592040139 |
| 1421568_at   | -0.036715092 | 5.301373716 | -0.28763718  | 0.779862835 | 0.779862835 | -5.592052453 |
| 1450474_at   | -0.025561105 | 3.312268045 | -0.287612088 | 0.779881463 | 0.779881463 | -5.592059365 |
| 1435546_a_at | 0.024594988  | 8.609638854 | 0.287593168  | 0.779895509 | 0.779895509 | -5.592064576 |
| 1437959_at   | 0.027840825  | 5.493233362 | 0.287583184  | 0.779902921 | 0.779902921 | -5.592067326 |
| 1455346_at   | -0.018666396 | 3.563674379 | -0.287526797 | 0.779944783 | 0.779944783 | -5.592082855 |
| 1450806_at   | 0.023512333  | 5.773293415 | 0.287515577  | 0.779953113 | 0.779953113 | -5.592085945 |
| 1442421_at   | 0.025036572  | 4.848746241 | 0.287479867  | 0.779979624 | 0.779979624 | -5.592095778 |
| 1454866_s_at | -0.054053816 | 8.462805438 | -0.287472724 | 0.779984927 | 0.779984927 | -5.592097744 |
| 1441937_s_at | -0.056688078 | 7.576390699 | -0.287429234 | 0.780017215 | 0.780017215 | -5.592109717 |
| 1444492_at   | 0.025310882  | 3.780827207 | 0.28742277   | 0.780022014 | 0.780022014 | -5.592111496 |
| 1416972_at   | 0.017694609  | 10.98385062 | 0.287404678  | 0.780035447 | 0.780035447 | -5.592116477 |
| 1452461_a_at | 0.020013018  | 6.268590393 | 0.287382488  | 0.780051921 | 0.780051921 | -5.592122584 |
| 1442516_at   | -0.028672075 | 3.768955927 | -0.287362203 | 0.780066982 | 0.780066982 | -5.592128168 |
| 1427733_a_at | -0.03068371  | 5.630769308 | -0.287322812 | 0.780096227 | 0.780096227 | -5.592139008 |
| 1446813_s_at | 0.021761123  | 4.128868117 | 0.2872849    | 0.780124376 | 0.780124376 | -5.59214944  |
| 1449465_at   | 0.040950035  | 6.28511543  | 0.287283707  | 0.780125261 | 0.780125261 | -5.592149768 |
| 1438514_at   | 0.024972172  | 5.515805527 | 0.287165157  | 0.780213283 | 0.780213283 | -5.59218238  |
| 1456019_at   | -0.030880251 | 8.712501458 | -0.287148543 | 0.780225618 | 0.780225618 | -5.592186949 |
| 1430159_at   | 0.031009461  | 4.294708562 | 0.286994751  | 0.780339811 | 0.780339811 | -5.592229234 |
| 1416551_at   | -0.036545778 | 9.57505474  | -0.286989251 | 0.780343895 | 0.780343895 | -5.592230746 |
| 1451536_at   | -0.036278531 | 8.439369877 | -0.286903136 | 0.780407839 | 0.780407839 | -5.592254412 |
| 1419409_at   | -0.029968207 | 4.434459122 | -0.286857573 | 0.780441672 | 0.780441672 | -5.592266932 |
| 1443359_at   | 0.020782424  | 4.581950812 | 0.286841435  | 0.780453656 | 0.780453656 | -5.592271365 |
| 1448419_at   | -0.031983894 | 8.907275071 | -0.286818348 | 0.780470799 | 0.780470799 | -5.592277708 |
| 1422510_at   | -0.028588999 | 9.199312572 | -0.286801928 | 0.780482992 | 0.780482992 | -5.592282218 |
| 1451389_at   | -0.023026824 | 4.617978434 | -0.286790467 | 0.780491503 | 0.780491503 | -5.592285367 |
| 1439136_at   | -0.031185313 | 7.731854161 | -0.286773218 | 0.780504312 | 0.780504312 | -5.592290104 |
| 1442354_at   | -0.020519569 | 4.090657387 | -0.28676545  | 0.78051008  | 0.78051008  | -5.592292238 |
| 1459615_at   | 0.024514008  | 3.424517891 | 0.286609537  | 0.780625861 | 0.780625861 | -5.592335049 |
| 1422454_at   | 0.075316801  | 6.633943126 | 0.286570647  | 0.780654742 | 0.780654742 | -5.592345724 |
| 1416272_at   | 0.027534766  | 9.853809918 | 0.286527004  | 0.780687153 | 0.780687153 | -5.592357703 |
| 1452390_at   | 0.02461894   | 5.845910346 | 0.286509278  | 0.780700317 | 0.780700317 | -5.592362567 |
| 1432663_at   | 0.031582948  | 4.531139539 | 0.286489615  | 0.78071492  | 0.78071492  | -5.592367963 |
| 1415924_at   | -0.020846889 | 3.320024995 | -0.286469087 | 0.780730165 | 0.780730165 | -5.592373595 |
| 1455204_at   | -0.022283979 | 8.723743593 | -0.286452654 | 0.780742369 | 0.780742369 | -5.592378104 |
| 1449383_at   | -0.042420449 | 5.538089385 | -0.286361653 | 0.780809953 | 0.780809953 | -5.592403068 |
| 1418694_at   | 0.017817768  | 7.526110155 | 0.28630832   | 0.780849563 | 0.780849563 | -5.592417694 |

|              |              |             |              |             |             |              |
|--------------|--------------|-------------|--------------|-------------|-------------|--------------|
| 1451468_s_at | -0.022341685 | 8.296501104 | -0.286303906 | 0.780852841 | 0.780852841 | -5.592418905 |
| 1418303_at   | -0.022332553 | 3.619338477 | -0.286298762 | 0.780856661 | 0.780856661 | -5.592420315 |
| 1417884_at   | -0.021556714 | 5.669968477 | -0.286286868 | 0.780865495 | 0.780865495 | -5.592423577 |
| 1436313_at   | 0.024960466  | 5.344078867 | 0.286224575  | 0.78091176  | 0.78091176  | -5.592440656 |
| 1425201_a_at | 0.022312783  | 5.903115246 | 0.286210236  | 0.78092241  | 0.78092241  | -5.592444587 |
| 1436367_at   | 0.026001566  | 6.795081849 | 0.286207929  | 0.780924123 | 0.780924123 | -5.59244522  |
| 1418357_at   | 0.051767551  | 4.103364438 | 0.286080126  | 0.781019046 | 0.781019046 | -5.592480247 |
| 1447663_at   | 0.023602194  | 5.14417451  | 0.285995262  | 0.781082079 | 0.781082079 | -5.592503498 |
| 1441956_s_at | 0.026396155  | 7.082275812 | 0.285983786  | 0.781090603 | 0.781090603 | -5.592506642 |
| 1452953_at   | -0.039019214 | 9.975291831 | -0.285953717 | 0.781112938 | 0.781112938 | -5.592514878 |
| 1451608_a_at | 0.028699078  | 5.628660698 | 0.28594356   | 0.781120483 | 0.781120483 | -5.59251766  |
| 1439849_at   | 0.019072717  | 6.86645995  | 0.285938119  | 0.781124524 | 0.781124524 | -5.59251915  |
| 1416915_at   | 0.025611516  | 9.125859037 | 0.285936553  | 0.781125687 | 0.781125687 | -5.592519579 |
| 1419308_at   | -0.032954074 | 7.230617639 | -0.28592619  | 0.781133384 | 0.781133384 | -5.592522417 |
| 1431570_at   | -0.025368538 | 4.053185797 | -0.285885849 | 0.781163349 | 0.781163349 | -5.592533464 |
| 1449200_at   | 0.019218516  | 9.111644129 | 0.285855467  | 0.781185917 | 0.781185917 | -5.592541784 |
| 1442973_at   | 0.027897301  | 3.759477379 | 0.28579145   | 0.781233469 | 0.781233469 | -5.59255931  |
| 1438990_x_at | 0.019213523  | 3.175708981 | 0.285760455  | 0.781256493 | 0.781256493 | -5.592567794 |
| 1454248_at   | -0.026637097 | 5.246173497 | -0.285698318 | 0.78130265  | 0.78130265  | -5.5925848   |
| 1422175_at   | -0.025517934 | 3.213215229 | -0.285690706 | 0.781308304 | 0.781308304 | -5.592586883 |
| 1427152_at   | -0.028161326 | 8.061763755 | -0.285679202 | 0.781316849 | 0.781316849 | -5.592590031 |
| 1444675_at   | 0.032661144  | 6.366411237 | 0.285650037  | 0.781338515 | 0.781338515 | -5.592598011 |
| 1428495_at   | 0.017894411  | 9.425925903 | 0.285635346  | 0.781349427 | 0.781349427 | -5.592602031 |
| 1446114_at   | -0.024265658 | 3.539127126 | -0.28560295  | 0.781373493 | 0.781373493 | -5.592610894 |
| 1421681_at   | 0.024271903  | 4.519000508 | 0.285593972  | 0.781380163 | 0.781380163 | -5.59261335  |
| 1441560_at   | -0.029233427 | 3.918820382 | -0.285535982 | 0.781423241 | 0.781423241 | -5.592629212 |
| 1458286_at   | 0.023826889  | 7.2657623   | 0.285520896  | 0.781434448 | 0.781434448 | -5.592633338 |
| 1444003_at   | -0.030353781 | 5.244700704 | -0.285498718 | 0.781450924 | 0.781450924 | -5.592639403 |
| 1439392_x_at | 0.022101076  | 3.333886503 | 0.285478559  | 0.781465899 | 0.781465899 | -5.592644916 |
| 1445394_at   | -0.023225315 | 5.46033393  | -0.285445167 | 0.781490706 | 0.781490706 | -5.592654046 |
| 1452265_at   | -0.021527731 | 10.46074397 | -0.28529727  | 0.78160058  | 0.78160058  | -5.592694474 |
| 1416070_a_at | -0.024684172 | 8.469398954 | -0.285276358 | 0.781616116 | 0.781616116 | -5.592700188 |
| 1419802_at   | -0.0213388   | 7.008612359 | -0.285235123 | 0.781646751 | 0.781646751 | -5.592711455 |
| 1425240_at   | 0.018699647  | 5.970177782 | 0.285221809  | 0.781656643 | 0.781656643 | -5.592715093 |
| 1456987_at   | 0.018883835  | 5.485859546 | 0.285189219  | 0.781680856 | 0.781680856 | -5.592723996 |
| 1441718_at   | -0.018602274 | 7.314886253 | -0.285181811 | 0.781686359 | 0.781686359 | -5.59272602  |
| 1454045_a_at | -0.021668957 | 7.633372449 | -0.285169143 | 0.781695771 | 0.781695771 | -5.592729481 |
| 1432199_at   | -0.021818454 | 3.550490646 | -0.285118888 | 0.781733109 | 0.781733109 | -5.592743207 |
| 1424848_at   | 0.026479669  | 3.934094534 | 0.285074035  | 0.781766434 | 0.781766434 | -5.592755456 |
| 1453736_s_at | -0.019635565 | 7.970554302 | -0.285057179 | 0.781778957 | 0.781778957 | -5.592760059 |
| 1427925_at   | 0.030689082  | 7.28403622  | 0.285003901  | 0.781818542 | 0.781818542 | -5.592774605 |
| 1425145_at   | 0.043401054  | 6.301998009 | 0.285002088  | 0.781819889 | 0.781819889 | -5.5927751   |
| 1423365_at   | -0.029074439 | 9.364839944 | -0.28492691  | 0.781875747 | 0.781875747 | -5.592795621 |
| 1419218_at   | 0.031279493  | 7.487896952 | 0.284922186  | 0.781879257 | 0.781879257 | -5.592796911 |
| 1457913_at   | -0.020536251 | 9.176083886 | -0.284898162 | 0.781897107 | 0.781897107 | -5.592803467 |
| 1447199_at   | 0.027543226  | 4.610453467 | 0.284885279  | 0.78190668  | 0.78190668  | -5.592806983 |
| 1452446_a_at | -0.018908018 | 9.20702439  | -0.284870121 | 0.781917942 | 0.781917942 | -5.592811119 |
| 1436738_at   | -0.020209718 | 7.549136545 | -0.284857849 | 0.78192706  | 0.78192706  | -5.592814468 |
| 1456155_x_at | -0.024713368 | 8.163487421 | -0.284851175 | 0.78193202  | 0.78193202  | -5.592816289 |
| 1416188_at   | -0.030753349 | 6.6031609   | -0.284842746 | 0.781938282 | 0.781938282 | -5.592818589 |
| 1459311_at   | -0.040394585 | 3.550009834 | -0.28479433  | 0.781974257 | 0.781974257 | -5.592831798 |
| 1417324_at   | 0.021792371  | 9.281246713 | 0.28473969   | 0.782014858 | 0.782014858 | -5.592846703 |
| 1425812_a_at | 0.028981705  | 5.398052159 | 0.284686357  | 0.782054488 | 0.782054488 | -5.592861249 |

|              |              |             |              |             |             |              |
|--------------|--------------|-------------|--------------|-------------|-------------|--------------|
| 1417123_at   | 0.029659851  | 6.994000922 | 0.284684379  | 0.782055957 | 0.782055957 | -5.592861788 |
| 1427459_at   | -0.025911817 | 3.946522175 | -0.284653576 | 0.782078846 | 0.782078846 | -5.592870188 |
| 1446557_at   | -0.031843041 | 4.029593409 | -0.284629767 | 0.782096538 | 0.782096538 | -5.592876668 |
| 1419153_at   | 0.020591712  | 11.2354064  | 0.284573636  | 0.782138248 | 0.782138248 | -5.592891982 |
| 1417838_at   | -0.039297164 | 5.332182008 | -0.284555765 | 0.782151528 | 0.782151528 | -5.592896854 |
| 1454806_at   | -0.025782057 | 6.403564846 | -0.284551203 | 0.782154919 | 0.782154919 | -5.592898097 |
| 1435829_at   | -0.025009061 | 7.480302619 | -0.284521651 | 0.782176879 | 0.782176879 | -5.592906152 |
| 1431946_a_at | 0.027031681  | 4.698980237 | 0.284499336  | 0.782193461 | 0.782193461 | -5.592912234 |
| 1438618_at   | -0.028090577 | 3.57408953  | -0.284469916 | 0.782215324 | 0.782215324 | -5.592920251 |
| 1453510_s_at | 0.019065825  | 5.320425097 | 0.284267859  | 0.782365481 | 0.782365481 | -5.592975293 |
| 1441725_at   | -0.02036037  | 4.671368795 | -0.284267202 | 0.782365969 | 0.782365969 | -5.592975472 |
| 1435009_at   | 0.022872915  | 7.236877929 | 0.284260025  | 0.782371303 | 0.782371303 | -5.592977426 |
| 1430911_at   | 0.025581195  | 3.619963785 | 0.284255288  | 0.782374823 | 0.782374823 | -5.592978716 |
| 1444486_at   | 0.035937922  | 4.581066777 | 0.284085807  | 0.78250078  | 0.78250078  | -5.593024853 |
| 1443602_at   | -0.029838051 | 3.287768504 | -0.284047791 | 0.782529034 | 0.782529034 | -5.593035198 |
| 1454895_at   | -0.025749687 | 8.115301829 | -0.283993972 | 0.782569033 | 0.782569033 | -5.593049841 |
| 1428264_at   | -0.019765325 | 9.157654045 | -0.283979292 | 0.782579944 | 0.782579944 | -5.593053834 |
| 1419093_at   | 0.025395464  | 3.493731279 | 0.28395816   | 0.78259565  | 0.78259565  | -5.593059583 |
| 1446781_at   | 0.022198422  | 4.039698485 | 0.283931355  | 0.782615572 | 0.782615572 | -5.593066874 |
| 1459151_x_at | -0.027645459 | 6.948676984 | -0.283875567 | 0.782657037 | 0.782657037 | -5.593082047 |
| 1449415_at   | -0.025228892 | 8.145289797 | -0.28387265  | 0.782659205 | 0.782659205 | -5.59308284  |
| 1448747_at   | 0.032762733  | 5.986857738 | 0.283826581  | 0.782693447 | 0.782693447 | -5.593095367 |
| 1430025_at   | -0.028439953 | 4.489760321 | -0.283788536 | 0.782721724 | 0.782721724 | -5.593105711 |
| 1441240_at   | 0.033682181  | 4.163008204 | 0.283748307  | 0.782751626 | 0.782751626 | -5.593116647 |
| 1428194_at   | 0.029849758  | 8.525580136 | 0.283660889  | 0.782816603 | 0.782816603 | -5.593140406 |
| 1418725_at   | 0.02390801   | 4.366467771 | 0.283644323  | 0.782828917 | 0.782828917 | -5.593144907 |
| 1438095_x_at | -0.028916511 | 7.089281986 | -0.283615832 | 0.782850095 | 0.782850095 | -5.593152649 |
| 1431224_at   | -0.03212862  | 6.848210073 | -0.283597091 | 0.782864025 | 0.782864025 | -5.59315774  |
| 1445452_at   | 0.024619284  | 4.822281403 | 0.28356304   | 0.782889337 | 0.782889337 | -5.593166991 |
| 1457659_x_at | -0.021830403 | 3.726824797 | -0.283557816 | 0.78289322  | 0.78289322  | -5.59316841  |
| 1431556_at   | -0.030427363 | 3.349906289 | -0.283535137 | 0.782910077 | 0.782910077 | -5.59317457  |
| 1419983_at   | 0.022825571  | 3.517241404 | 0.283478252  | 0.782952362 | 0.782952362 | -5.59319002  |
| 1451674_at   | 0.030822684  | 6.5320566   | 0.283431186  | 0.782987349 | 0.782987349 | -5.593202801 |
| 1420346_at   | -0.028937612 | 3.631796869 | -0.283369572 | 0.783033151 | 0.783033151 | -5.593219529 |
| 1458963_at   | -0.033130919 | 3.870965744 | -0.28330124  | 0.783083948 | 0.783083948 | -5.593238077 |
| 1457410_at   | -0.029853376 | 7.677894168 | -0.283229355 | 0.783137387 | 0.783137387 | -5.593257584 |
| 1416667_at   | 0.027180959  | 8.500893824 | 0.283208992  | 0.783152525 | 0.783152525 | -5.593263109 |
| 1437843_s_at | -0.023858329 | 10.02927695 | -0.283165021 | 0.783185214 | 0.783185214 | -5.593275038 |
| 1432180_at   | -0.025037735 | 3.588460704 | -0.283140179 | 0.783203682 | 0.783203682 | -5.593281777 |
| 1423855_x_at | 0.0175638    | 13.70054135 | 0.283113578  | 0.783223458 | 0.783223458 | -5.593288992 |
| 1453365_at   | -0.040040028 | 5.362143415 | -0.283085537 | 0.783244305 | 0.783244305 | -5.593296598 |
| 1457933_at   | -0.029064352 | 4.670819162 | -0.283061935 | 0.783261851 | 0.783261851 | -5.593302998 |
| 1435046_at   | -0.01953539  | 6.624700465 | -0.2830257   | 0.78328879  | 0.78328879  | -5.593312824 |
| 1445467_at   | 0.028951929  | 3.707208268 | 0.283019745  | 0.783293218 | 0.783293218 | -5.593314438 |
| 1436511_at   | -0.019417512 | 8.8261784   | -0.283012316 | 0.783298741 | 0.783298741 | -5.593316453 |
| 1423373_at   | -0.021898956 | 8.910733628 | -0.28299591  | 0.783310938 | 0.783310938 | -5.593320901 |
| 1459014_at   | 0.024612756  | 3.696177565 | 0.282990155  | 0.783315216 | 0.783315216 | -5.593322461 |
| 1452338_s_at | -0.020925777 | 8.971295336 | -0.282985224 | 0.783318882 | 0.783318882 | -5.593323798 |
| 1460313_at   | 0.01965499   | 4.026209989 | 0.282962961  | 0.783335434 | 0.783335434 | -5.593329833 |
| 1442965_at   | 0.025798706  | 4.963303586 | 0.282940079  | 0.783352446 | 0.783352446 | -5.593336036 |
| 1436134_at   | -0.039200561 | 6.653058972 | -0.282914523 | 0.783371447 | 0.783371447 | -5.593342963 |
| 1420499_at   | 0.030483384  | 4.3822859   | 0.282887951  | 0.783391202 | 0.783391202 | -5.593350165 |
| 1426777_a_at | 0.025375296  | 7.777640876 | 0.282867423  | 0.783406464 | 0.783406464 | -5.593355728 |

|              |              |             |              |             |             |              |
|--------------|--------------|-------------|--------------|-------------|-------------|--------------|
| 1438506_s_at | 0.046728525  | 6.188651396 | 0.282866191  | 0.783407381 | 0.783407381 | -5.593356062 |
| 1457639_at   | -0.020058428 | 7.38745441  | -0.282732937 | 0.783506456 | 0.783506456 | -5.593392165 |
| 1438646_x_at | -0.022996942 | 8.677515512 | -0.282697357 | 0.783532911 | 0.783532911 | -5.593401802 |
| 1418447_at   | 0.021487265  | 9.292368704 | 0.282693074  | 0.783536095 | 0.783536095 | -5.593402962 |
| 1440069_at   | -0.037332704 | 6.678284079 | -0.282648073 | 0.783569555 | 0.783569555 | -5.593415149 |
| 1440058_at   | 0.023626191  | 4.839607907 | 0.282638138  | 0.783576942 | 0.783576942 | -5.593417839 |
| 1423066_at   | -0.030985325 | 9.513914118 | -0.282544897 | 0.783646271 | 0.783646271 | -5.593443082 |
| 1454703_x_at | -0.030163579 | 7.65836975  | -0.282529265 | 0.783657895 | 0.783657895 | -5.593447314 |
| 1458576_at   | -0.035561831 | 6.190920486 | -0.282466857 | 0.7837043   | 0.7837043   | -5.593464205 |
| 1423335_at   | -0.020027092 | 10.33173392 | -0.282461174 | 0.783708526 | 0.783708526 | -5.593465743 |
| 1449513_at   | 0.03243942   | 4.038655877 | 0.282424235  | 0.783735994 | 0.783735994 | -5.593475738 |
| 1444569_at   | -0.032724694 | 5.173101919 | -0.282364863 | 0.783780142 | 0.783780142 | -5.593491801 |
| 1460370_at   | -0.026236741 | 6.553121508 | -0.282356021 | 0.783786717 | 0.783786717 | -5.593494193 |
| 1421006_at   | -0.032488576 | 6.697751103 | -0.28230224  | 0.78382671  | 0.78382671  | -5.59350874  |
| 1423168_at   | -0.025819859 | 10.32959574 | -0.282296941 | 0.78383065  | 0.78383065  | -5.593510174 |
| 1450008_a_at | 0.018718768  | 11.7741936  | 0.282293088  | 0.783833515 | 0.783833515 | -5.593511216 |
| 1431571_at   | -0.018976401 | 4.127623451 | -0.282233555 | 0.783877786 | 0.783877786 | -5.593527315 |
| 1423580_at   | -0.029563276 | 4.142763719 | -0.282225009 | 0.783884141 | 0.783884141 | -5.593529626 |
| 1430171_at   | 0.032692294  | 7.050373402 | 0.282184164  | 0.783914515 | 0.783914515 | -5.59354067  |
| 1422312_a_at | -0.031954624 | 3.598194133 | -0.282153599 | 0.783937244 | 0.783937244 | -5.593548932 |
| 1445855_at   | 0.025218334  | 4.387233232 | 0.282111886  | 0.783968265 | 0.783968265 | -5.593560208 |
| 1438650_x_at | 0.027710864  | 10.16257448 | 0.282102988  | 0.783974882 | 0.783974882 | -5.593562613 |
| 1432432_a_at | 0.018282986  | 3.373471288 | 0.282083271  | 0.783989545 | 0.783989545 | -5.593567941 |
| 1418012_at   | 0.019949222  | 8.987694731 | 0.281990618  | 0.784058449 | 0.784058449 | -5.593592978 |
| 1422542_at   | -0.020936844 | 3.40384819  | -0.281974171 | 0.784070681 | 0.784070681 | -5.593597421 |
| 1418942_at   | -0.022859504 | 9.356389076 | -0.281964932 | 0.784077552 | 0.784077552 | -5.593599917 |
| 1431653_at   | 0.018307105  | 3.247135454 | 0.281937531  | 0.78409793  | 0.78409793  | -5.593607319 |
| 1419608_a_at | -0.049272026 | 7.518518668 | -0.281924652 | 0.784107509 | 0.784107509 | -5.593610798 |
| 1454714_x_at | 0.07631653   | 9.927460426 | 0.281914769  | 0.784114858 | 0.784114858 | -5.593613467 |
| 1447579_at   | 0.021247807  | 3.562393055 | 0.281899264  | 0.784126389 | 0.784126389 | -5.593617655 |
| 1438573_at   | 0.020771654  | 6.94649762  | 0.281830444  | 0.784177573 | 0.784177573 | -5.59363624  |
| 1457521_at   | -0.028416139 | 4.056562224 | -0.281818885 | 0.784186169 | 0.784186169 | -5.593639361 |
| 1440642_at   | -0.019242668 | 5.169750589 | -0.281770757 | 0.784221964 | 0.784221964 | -5.593652355 |
| 1445830_at   | -0.018255702 | 6.377457061 | -0.281769294 | 0.784223052 | 0.784223052 | -5.593652751 |
| 1445568_at   | -0.020312078 | 4.123620427 | -0.28173829  | 0.784246111 | 0.784246111 | -5.59366112  |
| 1448698_at   | -0.022752756 | 10.10956999 | -0.281671819 | 0.784295549 | 0.784295549 | -5.593679061 |
| 1433839_at   | 0.01766209   | 7.601752777 | 0.281662157  | 0.784302736 | 0.784302736 | -5.593681668 |
| 1451082_at   | 0.020803615  | 8.468406755 | 0.281659825  | 0.78430447  | 0.78430447  | -5.593682298 |
| 1457158_at   | 0.033757803  | 5.276475905 | 0.281631268  | 0.78432571  | 0.78432571  | -5.593690004 |
| 1446526_at   | -0.02201137  | 4.431324119 | -0.281597647 | 0.784350716 | 0.784350716 | -5.593699075 |
| 1415707_at   | 0.018403443  | 10.04576384 | 0.281561306  | 0.784377746 | 0.784377746 | -5.593708879 |
| 1444581_at   | -0.033003626 | 5.984750863 | -0.281538849 | 0.78439445  | 0.78439445  | -5.593714937 |
| 1439944_at   | -0.03491141  | 4.447122701 | -0.281491756 | 0.784429478 | 0.784429478 | -5.59372764  |
| 1457789_at   | 0.030844803  | 4.680628502 | 0.2814788    | 0.784439114 | 0.784439114 | -5.593731134 |
| 1437141_x_at | 0.032837657  | 6.923536567 | 0.281431048  | 0.784474633 | 0.784474633 | -5.593744011 |
| 1437708_x_at | 0.053839156  | 9.644904111 | 0.2814216    | 0.784481661 | 0.784481661 | -5.593746559 |
| 1436860_at   | 0.018071783  | 9.070642193 | 0.281404182  | 0.784494617 | 0.784494617 | -5.593751255 |
| 1443958_at   | -0.021243804 | 4.59124791  | -0.281328099 | 0.78455121  | 0.78455121  | -5.593771766 |
| 1454810_s_at | -0.01826679  | 7.574776306 | -0.281319255 | 0.784557788 | 0.784557788 | -5.59377415  |
| 1428952_at   | -0.023210006 | 4.129967314 | -0.281295362 | 0.784575561 | 0.784575561 | -5.59378059  |
| 1431678_at   | -0.026211938 | 4.500541429 | -0.281264364 | 0.78459862  | 0.78459862  | -5.593788944 |
| 1454055_at   | -0.025306482 | 4.029451777 | -0.281243944 | 0.784613809 | 0.784613809 | -5.593794447 |
| 1453015_at   | 0.022962443  | 9.653009227 | 0.281240373  | 0.784616466 | 0.784616466 | -5.593795409 |

|              |              |             |              |             |             |              |
|--------------|--------------|-------------|--------------|-------------|-------------|--------------|
| 1430994_at   | -0.018073256 | 6.663033927 | -0.281239572 | 0.784617061 | 0.784617061 | -5.593795625 |
| 1457835_at   | 0.024026912  | 4.82265673  | 0.281219872  | 0.784631715 | 0.784631715 | -5.593800933 |
| 1447950_at   | -0.021303252 | 4.477359002 | -0.281167394 | 0.784670752 | 0.784670752 | -5.593815072 |
| 1454035_at   | 0.019696802  | 4.432884168 | 0.281156182  | 0.784679093 | 0.784679093 | -5.593818092 |
| 1429182_at   | -0.020733177 | 4.476525506 | -0.281056975 | 0.784752893 | 0.784752893 | -5.593844813 |
| 1442745_x_at | -0.028982448 | 9.144846525 | -0.281013852 | 0.784784972 | 0.784784972 | -5.593856425 |
| 1458765_at   | -0.021384052 | 6.118884068 | -0.281009958 | 0.784787869 | 0.784787869 | -5.593857473 |
| 1432416_a_at | 0.017322514  | 12.65658961 | 0.280989152  | 0.784803347 | 0.784803347 | -5.593863075 |
| 1420908_at   | 0.038519742  | 7.546137051 | 0.280989141  | 0.784803355 | 0.784803355 | -5.593863078 |
| 1421902_at   | 0.024462428  | 5.060535523 | 0.28098759   | 0.784804509 | 0.784804509 | -5.593863495 |
| 1439311_at   | -0.044328039 | 8.139057179 | -0.280966399 | 0.784820273 | 0.784820273 | -5.5938692   |
| 1441709_at   | -0.031389442 | 5.066424449 | -0.280859606 | 0.784899721 | 0.784899721 | -5.593897945 |
| 1454027_at   | -0.020171089 | 3.694309287 | -0.280844835 | 0.78491071  | 0.78491071  | -5.59390192  |
| 1449593_at   | 0.038743664  | 4.570589685 | 0.280812777  | 0.784934559 | 0.784934559 | -5.593910546 |
| 1422033_a_at | -0.020399266 | 6.56417849  | -0.280782871 | 0.784956809 | 0.784956809 | -5.593918592 |
| 1420141_at   | -0.037923659 | 4.577689883 | -0.280774545 | 0.784963003 | 0.784963003 | -5.593920832 |
| 1429756_at   | -0.035712029 | 4.722809832 | -0.280760683 | 0.784973316 | 0.784973316 | -5.593924561 |
| 1422531_at   | 0.022120179  | 5.87543946  | 0.280751659  | 0.78498003  | 0.78498003  | -5.593926989 |
| 1419071_at   | 0.025321917  | 5.790179352 | 0.280708122  | 0.785012421 | 0.785012421 | -5.5939387   |
| 1457675_at   | -0.018026219 | 7.76091994  | -0.280704659 | 0.785014997 | 0.785014997 | -5.593939631 |
| 1448505_at   | -0.030036649 | 10.12316006 | -0.28070424  | 0.785015309 | 0.785015309 | -5.593939744 |
| 1431616_at   | -0.017981549 | 3.627838834 | -0.280681703 | 0.785032076 | 0.785032076 | -5.593945805 |
| 1439056_at   | 0.019462811  | 3.542979181 | 0.280677227  | 0.785035406 | 0.785035406 | -5.593947009 |
| 1443698_at   | 0.036619826  | 5.679998176 | 0.280674735  | 0.78503726  | 0.78503726  | -5.593947679 |
| 1452034_at   | -0.024106175 | 8.282134004 | -0.280662948 | 0.785046029 | 0.785046029 | -5.593950849 |
| 1444619_x_at | 0.021305505  | 3.43009892  | 0.280646783  | 0.785058056 | 0.785058056 | -5.593955196 |
| 1455245_x_at | 0.019562477  | 13.73184746 | 0.280624739  | 0.785074457 | 0.785074457 | -5.593961124 |
| 1418613_at   | 0.023977396  | 4.515888666 | 0.280622034  | 0.78507647  | 0.78507647  | -5.593961851 |
| 1457347_at   | -0.070529632 | 5.287896741 | -0.280497296 | 0.785169278 | 0.785169278 | -5.593995384 |
| 1444088_at   | -0.032141906 | 3.836248977 | -0.280444285 | 0.785208719 | 0.785208719 | -5.59400963  |
| 1460396_at   | -0.027733307 | 8.235353308 | -0.280425921 | 0.785222383 | 0.785222383 | -5.594014565 |
| 1434182_at   | -0.023182346 | 6.650032262 | -0.280311834 | 0.785307271 | 0.785307271 | -5.594045214 |
| 1437841_x_at | -0.023395124 | 6.677874652 | -0.280268498 | 0.785339517 | 0.785339517 | -5.594056853 |
| 1433526_at   | 0.02025613   | 6.696369897 | 0.280264113  | 0.78534278  | 0.78534278  | -5.594058031 |
| 1416418_at   | -0.020637215 | 8.106325851 | -0.280227559 | 0.785369979 | 0.785369979 | -5.594067847 |
| 1443803_x_at | 0.018108873  | 6.367011442 | 0.280147892  | 0.78542926  | 0.78542926  | -5.594089236 |
| 1453759_at   | 0.018003073  | 6.103358983 | 0.280129011  | 0.78544331  | 0.78544331  | -5.594094304 |
| 1436363_a_at | -0.022033372 | 11.42692608 | -0.280115299 | 0.785453513 | 0.785453513 | -5.594097984 |
| 1438843_x_at | -0.023441611 | 9.175857536 | -0.280100412 | 0.785464591 | 0.785464591 | -5.59410198  |
| 1442704_at   | 0.030685129  | 6.716661226 | 0.280073604  | 0.78548454  | 0.78548454  | -5.594109175 |
| 1460185_at   | -0.027437603 | 5.916969722 | -0.279987176 | 0.785548854 | 0.785548854 | -5.594132366 |
| 1420185_at   | -0.021219865 | 3.146969006 | -0.279966903 | 0.78556394  | 0.78556394  | -5.594137805 |
| 1445369_at   | 0.029635639  | 3.490337679 | 0.279942123  | 0.785582381 | 0.785582381 | -5.594144452 |
| 1416115_at   | 0.018100706  | 8.947881893 | 0.279855126  | 0.785647121 | 0.785647121 | -5.594167785 |
| 1418863_at   | 0.028192165  | 4.36585358  | 0.279849475  | 0.785651327 | 0.785651327 | -5.594169301 |
| 1431819_at   | -0.023171137 | 5.229655428 | -0.279826052 | 0.785668758 | 0.785668758 | -5.594175582 |
| 1430739_at   | -0.020139969 | 3.400074008 | -0.279782784 | 0.785700957 | 0.785700957 | -5.594187182 |
| 1428059_at   | -0.030865897 | 4.16452713  | -0.279747275 | 0.785727383 | 0.785727383 | -5.594196701 |
| 1428713_s_at | 0.019036806  | 8.420269    | 0.279706907  | 0.785757426 | 0.785757426 | -5.594207522 |
| 1444746_at   | 0.0233192    | 9.601570231 | 0.279672408  | 0.7857831   | 0.7857831   | -5.594216768 |
| 1429191_at   | 0.017658387  | 8.473814512 | 0.279664582  | 0.785788925 | 0.785788925 | -5.594218865 |
| 1440931_at   | 0.019604082  | 5.479938483 | 0.279650771  | 0.785799204 | 0.785799204 | -5.594222567 |
| 1459082_at   | 0.020021073  | 3.697220983 | 0.279638614  | 0.785808251 | 0.785808251 | -5.594225824 |



|              |              |             |              |             |             |              |
|--------------|--------------|-------------|--------------|-------------|-------------|--------------|
| 1449217_at   | 0.025307197  | 9.60228744  | 0.279613521  | 0.785826926 | 0.785826926 | -5.594232548 |
| 1451312_at   | -0.018885936 | 9.997735288 | -0.279606069 | 0.785832472 | 0.785832472 | -5.594234544 |
| 1448767_s_at | 0.028635039  | 4.295354461 | 0.279586587  | 0.785846972 | 0.785846972 | -5.594239764 |
| 1433852_at   | 0.021532083  | 10.21769829 | 0.279569158  | 0.785859943 | 0.785859943 | -5.594244433 |
| 1444399_at   | 0.01931383   | 3.346591291 | 0.27954064   | 0.785881167 | 0.785881167 | -5.594252073 |
| 1458003_at   | 0.040275407  | 5.59654574  | 0.279523493  | 0.785893929 | 0.785893929 | -5.594256666 |
| 1422881_s_at | 0.034191509  | 8.491528704 | 0.27951744   | 0.785898434 | 0.785898434 | -5.594258287 |
| 1446948_at   | -0.040766295 | 4.393030116 | -0.279496428 | 0.785914072 | 0.785914072 | -5.594263915 |
| 1423759_a_at | -0.021954556 | 10.02972556 | -0.279483551 | 0.785923656 | 0.785923656 | -5.594267364 |
| 1449662_at   | 0.023392518  | 3.807980187 | 0.279429089  | 0.785964191 | 0.785964191 | -5.594281948 |
| 1445141_at   | -0.022245498 | 5.981203842 | -0.279424387 | 0.785967691 | 0.785967691 | -5.594283207 |
| 1436400_at   | -0.019209565 | 6.184628977 | -0.279384065 | 0.785997702 | 0.785997702 | -5.594294003 |
| 1456692_at   | -0.022473721 | 4.632286703 | -0.279375115 | 0.786004364 | 0.786004364 | -5.594296399 |
| 1458756_at   | 0.022192681  | 3.230643316 | 0.279367866  | 0.786009759 | 0.786009759 | -5.59429834  |
| 1418010_a_at | -0.022667652 | 10.26048003 | -0.279335945 | 0.786033517 | 0.786033517 | -5.594306885 |
| 1449660_s_at | -0.029147067 | 8.596127461 | -0.279269467 | 0.786082997 | 0.786082997 | -5.594324677 |
| 1422829_at   | -0.024121196 | 4.793999704 | -0.279221302 | 0.786118847 | 0.786118847 | -5.594337565 |
| 1422863_s_at | 0.022080989  | 7.056751185 | 0.279220243  | 0.786119635 | 0.786119635 | -5.594337849 |
| 1444186_at   | 0.02716353   | 6.560091684 | 0.279211354  | 0.786126252 | 0.786126252 | -5.594340227 |
| 1432157_at   | 0.020907575  | 3.728605915 | 0.279209359  | 0.786127737 | 0.786127737 | -5.594340761 |
| 1435539_at   | 0.029688362  | 6.47459725  | 0.27910648   | 0.786204314 | 0.786204314 | -5.594368282 |
| 1426395_s_at | 0.022304266  | 7.670111913 | 0.279103338  | 0.786206653 | 0.786206653 | -5.594369122 |
| 1423130_a_at | 0.018009954  | 12.58028629 | 0.279060803  | 0.786238314 | 0.786238314 | -5.594380498 |
| 1424640_at   | 0.030072281  | 7.386252558 | 0.279045221  | 0.786249913 | 0.786249913 | -5.594384665 |
| 1425226_x_at | -0.027454659 | 5.203390285 | -0.279030387 | 0.786260955 | 0.786260955 | -5.594388631 |
| 1451001_at   | -0.029228528 | 4.370377145 | -0.278959999 | 0.78631335  | 0.78631335  | -5.59440745  |
| 1429964_at   | 0.028695892  | 4.078348933 | 0.278959483  | 0.786313734 | 0.786313734 | -5.594407588 |
| 1442129_at   | 0.03413303   | 7.521706947 | 0.278925913  | 0.786338724 | 0.786338724 | -5.594416561 |
| 1439221_s_at | -0.025097263 | 4.970267665 | -0.278892963 | 0.786363252 | 0.786363252 | -5.594425368 |
| 1417112_at   | 0.020997373  | 9.925317069 | 0.278786448  | 0.786442542 | 0.786442542 | -5.59445383  |
| 1428089_at   | 0.032979357  | 5.021868091 | 0.278754786  | 0.786466113 | 0.786466113 | -5.594462288 |
| 1421347_at   | 0.018333292  | 3.860935758 | 0.278652643  | 0.786542153 | 0.786542153 | -5.594489569 |
| 1436903_at   | -0.01839747  | 3.175478167 | -0.278637216 | 0.786553637 | 0.786553637 | -5.594493688 |
| 1426503_a_at | -0.020091473 | 7.980563326 | -0.278571119 | 0.786602844 | 0.786602844 | -5.594511335 |
| 1449192_at   | -0.019698671 | 8.079424842 | -0.278511405 | 0.7866473   | 0.7866473   | -5.594527275 |
| 1443823_s_at | -0.034883914 | 4.252780931 | -0.278502445 | 0.786653971 | 0.786653971 | -5.594529666 |
| 1426550_at   | -0.02661147  | 4.2211907   | -0.278451251 | 0.786692084 | 0.786692084 | -5.594543328 |
| 1458207_at   | 0.025188508  | 3.651244425 | 0.278301626  | 0.786803483 | 0.786803483 | -5.594583244 |
| 1423170_at   | 0.037193242  | 7.514512654 | 0.27823296   | 0.786854608 | 0.786854608 | -5.594601555 |
| 1457482_at   | 0.022525057  | 7.327688116 | 0.278211184  | 0.786870821 | 0.786870821 | -5.594607362 |
| 1443313_at   | -0.018658844 | 3.551430083 | -0.278205328 | 0.786875181 | 0.786875181 | -5.594608923 |
| 1451824_at   | -0.023824197 | 3.26611236  | -0.278204341 | 0.786875916 | 0.786875916 | -5.594609186 |
| 1440439_at   | 0.023738739  | 7.143266648 | 0.278190646  | 0.786886113 | 0.786886113 | -5.594612837 |
| 1418305_s_at | 0.018594333  | 9.911115793 | 0.278152697  | 0.786914368 | 0.786914368 | -5.594622954 |
| 1430137_at   | -0.029080783 | 4.892621519 | -0.278147481 | 0.786918252 | 0.786918252 | -5.594624344 |
| 1419476_at   | -0.020527756 | 4.353894932 | -0.278127852 | 0.786932868 | 0.786932868 | -5.594629576 |
| 1456497_x_at | 0.017766997  | 13.38473068 | 0.278042415  | 0.786996483 | 0.786996483 | -5.594652345 |
| 1432294_at   | -0.029120066 | 6.49286315  | -0.278016161 | 0.787016031 | 0.787016031 | -5.59465934  |
| 1429904_at   | 0.02463143   | 4.224410296 | 0.278005405  | 0.78702404  | 0.78702404  | -5.594662206 |
| 1449641_at   | 0.040469968  | 3.992216893 | 0.277990319  | 0.787035273 | 0.787035273 | -5.594666225 |
| 1456309_x_at | -0.023167199 | 9.915936336 | -0.277896442 | 0.787105176 | 0.787105176 | -5.594691231 |
| 1448234_at   | 0.01817325   | 10.48875475 | 0.277876374  | 0.787120119 | 0.787120119 | -5.594696575 |
| 1442212_at   | -0.026508037 | 4.857528992 | -0.277815627 | 0.787165354 | 0.787165354 | -5.594712751 |

|              |              |             |              |             |             |              |
|--------------|--------------|-------------|--------------|-------------|-------------|--------------|
| 1421837_at   | -0.024697619 | 6.514485428 | -0.277798354 | 0.787178216 | 0.787178216 | -5.594717349 |
| 1460702_at   | -0.018394145 | 8.030409745 | -0.277784417 | 0.787188594 | 0.787188594 | -5.59472106  |
| 1438199_at   | 0.029628195  | 8.16460184  | 0.277768688  | 0.787200307 | 0.787200307 | -5.594725247 |
| 1457130_at   | -0.021492391 | 3.71745762  | -0.277727351 | 0.787231089 | 0.787231089 | -5.59473625  |
| 1423904_a_at | -0.048426251 | 6.296923275 | -0.277722107 | 0.787234994 | 0.787234994 | -5.594737646 |
| 1434957_at   | 0.026606063  | 9.172947949 | 0.277716129  | 0.787239446 | 0.787239446 | -5.594739237 |
| 1417245_at   | 0.034781258  | 9.331880901 | 0.277710894  | 0.787243344 | 0.787243344 | -5.59474063  |
| 1417865_at   | 0.02367905   | 9.581510773 | 0.277705889  | 0.787247071 | 0.787247071 | -5.594741962 |
| 1417735_at   | -0.029039634 | 3.478952135 | -0.277691807 | 0.787257558 | 0.787257558 | -5.59474571  |
| 1456676_a_at | 0.024589017  | 5.624728997 | 0.277672202  | 0.787272157 | 0.787272157 | -5.594750928 |
| 1459182_at   | -0.019312989 | 4.139313723 | -0.277622546 | 0.787309135 | 0.787309135 | -5.59476414  |
| 1453155_at   | -0.017673851 | 9.985749035 | -0.277607599 | 0.787320266 | 0.787320266 | -5.594768117 |
| 1419590_at   | 0.021692781  | 3.925774539 | 0.277597455  | 0.78732782  | 0.78732782  | -5.594770816 |
| 1444799_at   | 0.020917807  | 3.101517138 | 0.277573085  | 0.787345968 | 0.787345968 | -5.594777299 |
| 1430524_at   | 0.025178222  | 3.609734615 | 0.277570689  | 0.787347753 | 0.787347753 | -5.594777936 |
| 1454269_s_at | -0.020381692 | 3.239096045 | -0.277528765 | 0.787378973 | 0.787378973 | -5.594789088 |
| 1434165_at   | -0.031173183 | 7.438245392 | -0.277518137 | 0.787386888 | 0.787386888 | -5.594791915 |
| 1419605_at   | -0.02454165  | 4.977373658 | -0.277490456 | 0.787407503 | 0.787407503 | -5.594799277 |
| 1443508_at   | 0.027801768  | 4.407773204 | 0.277482705  | 0.787413276 | 0.787413276 | -5.594801338 |
| 1457050_at   | -0.027298891 | 4.791932631 | -0.277431973 | 0.787451057 | 0.787451057 | -5.594814828 |
| 1440789_at   | -0.048913807 | 7.233909825 | -0.277202529 | 0.787621938 | 0.787621938 | -5.594875809 |
| 1428729_at   | 0.063999623  | 7.790652673 | 0.277195328  | 0.7876273   | 0.7876273   | -5.594877722 |
| 1419497_at   | 0.032364589  | 4.572967822 | 0.277150572  | 0.787660635 | 0.787660635 | -5.594889611 |
| 1416829_at   | 0.017648242  | 12.7688824  | 0.27708017   | 0.787713071 | 0.787713071 | -5.594908309 |
| 1446772_at   | -0.035472439 | 7.681170202 | -0.277055667 | 0.78773132  | 0.78773132  | -5.594914816 |
| 1456690_at   | -0.02822535  | 4.036692961 | -0.276994225 | 0.787777084 | 0.787777084 | -5.594931128 |
| 1458245_at   | 0.033445555  | 4.905861945 | 0.27698001   | 0.787787672 | 0.787787672 | -5.594934902 |
| 1436044_at   | -0.024825672 | 3.745891317 | -0.276972362 | 0.787793368 | 0.787793368 | -5.594936932 |
| 1437369_at   | 0.022929567  | 4.034758325 | 0.276881448  | 0.787861086 | 0.787861086 | -5.594961062 |
| 1419908_at   | 0.019644954  | 3.358419015 | 0.276870761  | 0.787869046 | 0.787869046 | -5.594963898 |
| 1429870_at   | 0.025650268  | 6.4484946   | 0.276829823  | 0.787899539 | 0.787899539 | -5.59497476  |
| 1431591_s_at | 0.023935534  | 5.594068943 | 0.276803268  | 0.78791932  | 0.78791932  | -5.594981806 |
| 1417952_at   | -0.024252076 | 5.561625498 | -0.276751624 | 0.787957788 | 0.787957788 | -5.594995505 |
| 1442785_at   | -0.028573052 | 6.609326633 | -0.27672049  | 0.787980979 | 0.787980979 | -5.595003763 |
| 1455182_at   | 0.022379501  | 9.140038118 | 0.276705016  | 0.787992506 | 0.787992506 | -5.595007867 |
| 1456997_at   | 0.019721939  | 6.024901592 | 0.276695345  | 0.78799971  | 0.78799971  | -5.595010431 |
| 1431826_a_at | -0.027037623 | 4.13356129  | -0.276650464 | 0.788033142 | 0.788033142 | -5.595022332 |
| 1460123_at   | 0.026355407  | 3.65235262  | 0.276628948  | 0.788049169 | 0.788049169 | -5.595028037 |
| 1445983_at   | -0.024706271 | 3.331637534 | -0.276627915 | 0.788049939 | 0.788049939 | -5.595028311 |
| 1445139_at   | -0.02202434  | 5.32463873  | -0.276598413 | 0.788071916 | 0.788071916 | -5.595036132 |
| 1444646_at   | 0.030097499  | 7.169777543 | 0.276548315  | 0.788109235 | 0.788109235 | -5.595049412 |
| 1460405_at   | 0.024958682  | 6.446219561 | 0.276539269  | 0.788115974 | 0.788115974 | -5.59505181  |
| 1428365_a_at | -0.032772617 | 8.761676751 | -0.276537482 | 0.788117305 | 0.788117305 | -5.595052284 |
| 1459095_at   | -0.020892443 | 3.124225144 | -0.276533013 | 0.788120634 | 0.788120634 | -5.595053468 |
| 1442541_at   | -0.024249335 | 6.684256952 | -0.276528011 | 0.78812436  | 0.78812436  | -5.595054794 |
| 1418174_at   | -0.026511913 | 6.02959619  | -0.276518977 | 0.78813109  | 0.78813109  | -5.595057188 |
| 1420180_at   | 0.020651856  | 3.631485483 | 0.276515512  | 0.788133671 | 0.788133671 | -5.595058106 |
| 1455360_at   | -0.025206751 | 5.657259379 | -0.276449541 | 0.788182816 | 0.788182816 | -5.595075588 |
| 1422457_s_at | 0.019812239  | 11.5795035  | 0.276425631  | 0.788200628 | 0.788200628 | -5.595081923 |
| 1459017_at   | -0.021774769 | 3.913811805 | -0.276418846 | 0.788205683 | 0.788205683 | -5.595083721 |
| 1438756_at   | -0.055679868 | 6.416047788 | -0.276411601 | 0.78821108  | 0.78821108  | -5.59508564  |
| 1421286_a_at | 0.022543488  | 4.519926821 | 0.276392049  | 0.788225645 | 0.788225645 | -5.59509082  |
| 1448778_at   | 0.020378938  | 10.1794435  | 0.276360064  | 0.788249473 | 0.788249473 | -5.595099292 |

|              |              |             |              |             |             |              |
|--------------|--------------|-------------|--------------|-------------|-------------|--------------|
| 1448233_at   | 0.023312711  | 10.10649484 | 0.276349994  | 0.788256975 | 0.788256975 | -5.59510196  |
| 1422501_s_at | -0.021303342 | 7.577198276 | -0.276336411 | 0.788267094 | 0.788267094 | -5.595105557 |
| 1438166_x_at | 0.02648876   | 6.635264353 | 0.276321118  | 0.788278487 | 0.788278487 | -5.595109608 |
| 1447541_s_at | -0.034545453 | 3.635395596 | -0.276271556 | 0.78831541  | 0.78831541  | -5.595122732 |
| 1449171_at   | 0.026828739  | 8.378541332 | 0.276190643  | 0.788375691 | 0.788375691 | -5.595144155 |
| 1420436_x_at | 0.02792517   | 3.64454468  | 0.276188314  | 0.788377426 | 0.788377426 | -5.595144771 |
| 1421917_at   | 0.018233561  | 11.44087905 | 0.276180578  | 0.78838319  | 0.78838319  | -5.595146819 |
| 1457417_at   | 0.020945736  | 4.171711965 | 0.276177316  | 0.78838562  | 0.78838562  | -5.595147682 |
| 1442192_at   | -0.020663363 | 4.837338753 | -0.276054593 | 0.788477053 | 0.788477053 | -5.595180161 |
| 1416056_a_at | 0.026356655  | 12.02365483 | 0.276049626  | 0.788480753 | 0.788480753 | -5.595181475 |
| 1450295_s_at | -0.017731227 | 6.073756535 | -0.276032042 | 0.788493854 | 0.788493854 | -5.595186127 |
| 1447393_at   | 0.036346999  | 6.849018885 | 0.27602824   | 0.788496687 | 0.788496687 | -5.595187133 |
| 1416338_at   | -0.016890458 | 9.286916727 | -0.276024336 | 0.788499595 | 0.788499595 | -5.595188166 |
| 1442657_at   | 0.01987953   | 3.435641399 | 0.275997519  | 0.788519576 | 0.788519576 | -5.59519526  |
| 1457710_at   | 0.033521485  | 4.073161514 | 0.275989958  | 0.788525209 | 0.788525209 | -5.59519726  |
| 1444019_at   | -0.024915045 | 5.739861173 | -0.275963767 | 0.788544723 | 0.788544723 | -5.595204188 |
| 1444149_at   | 0.031139854  | 6.227288716 | 0.275947908  | 0.788556539 | 0.788556539 | -5.595208383 |
| 1450851_at   | 0.025378102  | 9.951303957 | 0.275943324  | 0.788559955 | 0.788559955 | -5.595209595 |
| 1444433_at   | -0.030461204 | 6.152194911 | -0.275891121 | 0.788598849 | 0.788598849 | -5.595223401 |
| 1423825_at   | -0.020199574 | 9.108853959 | -0.275890171 | 0.788599558 | 0.788599558 | -5.595223652 |
| 1422181_at   | -0.016485727 | 3.873945238 | -0.275866839 | 0.788616941 | 0.788616941 | -5.595229822 |
| 1429036_at   | -0.021011976 | 4.518018942 | -0.275813255 | 0.788656866 | 0.788656866 | -5.595243989 |
| 1457108_at   | 0.033509619  | 4.670794127 | 0.275691083  | 0.788747899 | 0.788747899 | -5.595276279 |
| 1452704_at   | -0.031842433 | 7.434975263 | -0.27568174  | 0.78875486  | 0.78875486  | -5.595278748 |
| 1441890_x_at | -0.024806759 | 3.969032301 | -0.275617594 | 0.788802658 | 0.788802658 | -5.595295696 |
| 1457689_at   | 0.058999288  | 5.278599402 | 0.275609884  | 0.788808403 | 0.788808403 | -5.595297733 |
| 1431973_at   | -0.024704334 | 7.099099331 | -0.275598789 | 0.78881667  | 0.78881667  | -5.595300664 |
| 1450518_at   | 0.036662029  | 4.092311835 | 0.275571818  | 0.788836768 | 0.788836768 | -5.595307788 |
| 1456199_x_at | 0.028427462  | 9.251019972 | 0.275551387  | 0.788851992 | 0.788851992 | -5.595313184 |
| 1430050_at   | 0.019884079  | 4.887218163 | 0.275534078  | 0.78886489  | 0.78886489  | -5.595317756 |
| 1418841_s_at | 0.019781242  | 9.449596109 | 0.275487991  | 0.788899233 | 0.788899233 | -5.595329926 |
| 1415971_at   | 0.01800667   | 11.98669787 | 0.27546937   | 0.788913109 | 0.788913109 | -5.595334843 |
| 1436691_x_at | -0.017556226 | 12.50410892 | -0.275463576 | 0.788917426 | 0.788917426 | -5.595336373 |
| 1428863_at   | -0.023353206 | 7.044301171 | -0.275441144 | 0.788934142 | 0.788934142 | -5.595342296 |
| 1440777_x_at | -0.034536472 | 4.825515663 | -0.275416867 | 0.788952233 | 0.788952233 | -5.595348705 |
| 1424660_s_at | 0.025727814  | 5.747762443 | 0.275388051  | 0.788973706 | 0.788973706 | -5.595356311 |
| 1432551_at   | -0.021107119 | 3.864222159 | -0.27537993  | 0.788979758 | 0.788979758 | -5.595358455 |
| 1458785_at   | 0.024453907  | 4.742554664 | 0.275345552  | 0.789005377 | 0.789005377 | -5.595367529 |
| 1421293_at   | -0.030991611 | 3.992470263 | -0.27532604  | 0.789019917 | 0.789019917 | -5.595372678 |
| 1445993_at   | -0.021252888 | 3.381885218 | -0.275323274 | 0.789021978 | 0.789021978 | -5.595373408 |
| 1452890_at   | 0.018313348  | 7.091405217 | 0.275294858  | 0.789043154 | 0.789043154 | -5.595380907 |
| 1438553_x_at | 0.042169077  | 6.084744487 | 0.275235514  | 0.789087379 | 0.789087379 | -5.595396564 |
| 1425787_a_at | 0.019545415  | 5.072178877 | 0.27521031   | 0.789106162 | 0.789106162 | -5.595403213 |
| 1456529_at   | -0.025880171 | 4.52490372  | -0.275184763 | 0.7891252   | 0.7891252   | -5.595409952 |
| 1419716_a_at | 0.021625893  | 6.606647105 | 0.275177583  | 0.789130551 | 0.789130551 | -5.595411846 |
| 1419293_at   | 0.024224737  | 5.337647965 | 0.275153287  | 0.789148658 | 0.789148658 | -5.595418254 |
| 1451135_at   | 0.020827896  | 9.572593861 | 0.275112273  | 0.789179224 | 0.789179224 | -5.595429071 |
| 1418082_at   | 0.027831539  | 5.85856942  | 0.27509087   | 0.789195175 | 0.789195175 | -5.595434714 |
| 1457989_at   | -0.02533599  | 4.835081346 | -0.274958243 | 0.789294018 | 0.789294018 | -5.595469677 |
| 1428296_at   | -0.018042287 | 10.04140973 | -0.274955833 | 0.789295814 | 0.789295814 | -5.595470313 |
| 1460589_at   | -0.031882384 | 5.3389346   | -0.274916165 | 0.789325378 | 0.789325378 | -5.595480767 |
| 1415810_at   | -0.0278431   | 9.872714001 | -0.274909873 | 0.789330068 | 0.789330068 | -5.595482425 |
| 1451525_at   | -0.024053723 | 7.367435845 | -0.274880104 | 0.789352255 | 0.789352255 | -5.595490269 |

|              |              |             |              |             |             |              |
|--------------|--------------|-------------|--------------|-------------|-------------|--------------|
| 1429083_at   | 0.022955266  | 7.535880239 | 0.274870163  | 0.789359664 | 0.789359664 | -5.595492888 |
| 1435884_at   | -0.045832914 | 7.111266956 | -0.274837906 | 0.789383706 | 0.789383706 | -5.595501386 |
| 1416535_at   | 0.02211374   | 8.998418606 | 0.274825417  | 0.789393014 | 0.789393014 | -5.595504676 |
| 1434782_at   | 0.018555231  | 9.627758807 | 0.274816796  | 0.78939944  | 0.78939944  | -5.595506948 |
| 1415895_at   | 0.018933652  | 10.46401005 | 0.274784417  | 0.789423573 | 0.789423573 | -5.595515476 |
| 1452193_a_at | -0.025603338 | 9.336450175 | -0.274780913 | 0.789426184 | 0.789426184 | -5.595516399 |
| 1440367_at   | 0.019852644  | 5.877668613 | 0.274764114  | 0.789438705 | 0.789438705 | -5.595520824 |
| 1447905_x_at | -0.024846642 | 11.17608674 | -0.274658399 | 0.7895175   | 0.7895175   | -5.595548661 |
| 1424425_a_at | 0.023522494  | 9.858460908 | 0.274636803  | 0.789533596 | 0.789533596 | -5.595554347 |
| 1423341_at   | -0.027003526 | 7.550716508 | -0.274630971 | 0.789537944 | 0.789537944 | -5.595555882 |
| 1428227_at   | 0.02035593   | 9.226131869 | 0.274630966  | 0.789537947 | 0.789537947 | -5.595555883 |
| 1441094_at   | -0.032475832 | 5.805668398 | -0.274608665 | 0.789554569 | 0.789554569 | -5.595561754 |
| 1420341_at   | -0.017804367 | 3.7091848   | -0.274579275 | 0.789576476 | 0.789576476 | -5.59556949  |
| 1423721_at   | -0.019435534 | 11.67701257 | -0.274576391 | 0.789578625 | 0.789578625 | -5.595570249 |
| 1438393_at   | 0.019511032  | 3.683084378 | 0.274552678  | 0.789596301 | 0.789596301 | -5.59557649  |
| 1456649_at   | -0.023804289 | 5.361103541 | -0.27454155  | 0.789604596 | 0.789604596 | -5.595579418 |
| 1454931_at   | -0.028895377 | 9.829155748 | -0.274452537 | 0.789670945 | 0.789670945 | -5.59560284  |
| 1428529_at   | 0.024920818  | 10.12806562 | 0.274375365  | 0.789728471 | 0.789728471 | -5.595623139 |
| 1444731_at   | 0.018738763  | 4.754142053 | 0.274334099  | 0.789759231 | 0.789759231 | -5.595633992 |
| 1428552_at   | 0.024656593  | 9.570393883 | 0.274333913  | 0.78975937  | 0.78975937  | -5.595634041 |
| 1440380_at   | -0.019295559 | 3.588990219 | -0.274320552 | 0.78976933  | 0.78976933  | -5.595637554 |
| 1456985_at   | 0.019347111  | 6.470544538 | 0.274300976  | 0.789783922 | 0.789783922 | -5.595642702 |
| 1427493_at   | 0.027727409  | 6.456927617 | 0.274271384  | 0.789805981 | 0.789805981 | -5.595650482 |
| 1451986_s_at | 0.019799074  | 7.556334451 | 0.274269534  | 0.78980736  | 0.78980736  | -5.595650968 |
| 1440525_at   | -0.02053334  | 4.085106741 | -0.274252183 | 0.789820295 | 0.789820295 | -5.59565553  |
| 1452826_s_at | 0.021052043  | 7.372760525 | 0.274226104  | 0.789839736 | 0.789839736 | -5.595662386 |
| 1417886_at   | -0.019270158 | 9.40008358  | -0.274178287 | 0.789875381 | 0.789875381 | -5.595674954 |
| 1443294_at   | 0.03412428   | 5.436229648 | 0.274128369  | 0.789912594 | 0.789912594 | -5.595688073 |
| 1436274_at   | -0.0255747   | 4.822809338 | -0.274106872 | 0.78992862  | 0.78992862  | -5.595693722 |
| 1443244_at   | 0.02076855   | 5.027363906 | 0.274013623  | 0.789998136 | 0.789998136 | -5.595718219 |
| 1444480_at   | -0.029355158 | 4.431168201 | -0.273980811 | 0.790022597 | 0.790022597 | -5.595726837 |
| 1441208_at   | 0.034754364  | 5.561121585 | 0.273967955  | 0.790032182 | 0.790032182 | -5.595730214 |
| 1450024_at   | 0.028179205  | 8.450737951 | 0.273892728  | 0.790088266 | 0.790088266 | -5.595749968 |
| 1432722_at   | -0.019604062 | 4.191828209 | -0.273818268 | 0.790143778 | 0.790143778 | -5.595769515 |
| 1428605_at   | 0.021249317  | 8.277379346 | 0.273782251  | 0.790170631 | 0.790170631 | -5.595778968 |
| 1436916_at   | -0.028100249 | 4.363696203 | -0.273743608 | 0.790199442 | 0.790199442 | -5.595789109 |
| 1452215_at   | 0.020470154  | 8.533789919 | 0.273722477  | 0.790215196 | 0.790215196 | -5.595794654 |
| 1425770_at   | 0.029044964  | 4.485329793 | 0.273717243  | 0.790219098 | 0.790219098 | -5.595796027 |
| 1422635_at   | -0.049953051 | 5.344137433 | -0.273711699 | 0.790223232 | 0.790223232 | -5.595797482 |
| 1420875_at   | 0.025667534  | 9.895502405 | 0.273494937  | 0.790384848 | 0.790384848 | -5.595854335 |
| 1453721_a_at | -0.02632168  | 6.913535099 | -0.273468357 | 0.790404667 | 0.790404667 | -5.595861303 |
| 1451812_at   | -0.029294079 | 4.828743052 | -0.273454737 | 0.790414823 | 0.790414823 | -5.595864874 |
| 1458171_at   | -0.025864802 | 5.42776781  | -0.273440321 | 0.790425572 | 0.790425572 | -5.595868653 |
| 1443572_at   | -0.031149281 | 3.284945922 | -0.273419475 | 0.790441115 | 0.790441115 | -5.595874117 |
| 1445381_at   | 0.021928335  | 6.506149538 | 0.273391545  | 0.790461941 | 0.790461941 | -5.595881437 |
| 1422128_at   | -0.018876548 | 8.049271599 | -0.273350143 | 0.790492813 | 0.790492813 | -5.595892287 |
| 1425780_a_at | 0.017101074  | 10.38229262 | 0.273347719  | 0.79049462  | 0.79049462  | -5.595892922 |
| 1446995_at   | -0.019278971 | 3.285413294 | -0.273319767 | 0.790515462 | 0.790515462 | -5.595900246 |
| 1437753_at   | 0.018166664  | 6.638691082 | 0.273308932  | 0.790523542 | 0.790523542 | -5.595903085 |
| 1448548_at   | -0.025560142 | 10.14528216 | -0.273302975 | 0.790527983 | 0.790527983 | -5.595904646 |
| 1422627_a_at | 0.018196849  | 8.039080298 | 0.273298587  | 0.790531255 | 0.790531255 | -5.595905795 |
| 1434050_at   | -0.024271251 | 7.395401646 | -0.273278824 | 0.790545992 | 0.790545992 | -5.595910973 |
| 1421856_at   | -0.021779872 | 4.058082966 | -0.273261775 | 0.790558705 | 0.790558705 | -5.59591544  |

|              |              |             |              |             |             |              |
|--------------|--------------|-------------|--------------|-------------|-------------|--------------|
| 1430146_at   | -0.021109803 | 5.005709377 | -0.273252056 | 0.790565952 | 0.790565952 | -5.595917985 |
| 1436626_at   | -0.049047347 | 5.403745592 | -0.273235379 | 0.790578388 | 0.790578388 | -5.595922354 |
| 1440026_at   | 0.028713514  | 8.545929521 | 0.273213168  | 0.79059495  | 0.79059495  | -5.595928172 |
| 1459648_at   | 0.024845313  | 6.023614087 | 0.273178648  | 0.790620692 | 0.790620692 | -5.595937212 |
| 1439665_at   | 0.044160667  | 8.500596842 | 0.273176113  | 0.790622582 | 0.790622582 | -5.595937876 |
| 1452033_at   | -0.019739364 | 7.937962741 | -0.273141699 | 0.790648244 | 0.790648244 | -5.595946888 |
| 1419268_at   | -0.039639519 | 5.602901405 | -0.2731279   | 0.790658534 | 0.790658534 | -5.595950501 |
| 1458410_at   | 0.034611587  | 5.259953322 | 0.273064331  | 0.790705938 | 0.790705938 | -5.595967144 |
| 1434619_at   | -0.023736045 | 8.469076039 | -0.273059719 | 0.790709377 | 0.790709377 | -5.595968351 |
| 1450068_at   | 0.024215839  | 7.615162875 | 0.273021391  | 0.790737959 | 0.790737959 | -5.595978383 |
| 1437164_x_at | -0.039216006 | 9.36753342  | -0.272925717 | 0.790809307 | 0.790809307 | -5.59600342  |
| 1424493_s_at | 0.022529099  | 3.912418348 | 0.272907593  | 0.790822823 | 0.790822823 | -5.596008162 |
| 1418231_at   | -0.026569435 | 8.01989672  | -0.272897848 | 0.79083009  | 0.79083009  | -5.596010712 |
| 1443886_at   | -0.018151154 | 3.555270128 | -0.272897046 | 0.790830689 | 0.790830689 | -5.596010921 |
| 1457970_at   | 0.035651172  | 3.765349918 | 0.272886955  | 0.790838213 | 0.790838213 | -5.596013561 |
| 1454738_x_at | 0.023312782  | 9.04166614  | 0.272874871  | 0.790847225 | 0.790847225 | -5.596016722 |
| 1433186_at   | 0.030226179  | 5.288923876 | 0.272873565  | 0.790848199 | 0.790848199 | -5.596017064 |
| 1439807_at   | -0.024553344 | 3.191007752 | -0.272809385 | 0.790896063 | 0.790896063 | -5.596033851 |
| 1430644_at   | -0.025819782 | 3.780735694 | -0.272751101 | 0.79093953  | 0.79093953  | -5.596049093 |
| 1454754_a_at | -0.021695939 | 10.38317828 | -0.272675828 | 0.790995668 | 0.790995668 | -5.596068773 |
| 1442270_at   | -0.024470042 | 8.875328903 | -0.272642779 | 0.791020316 | 0.791020316 | -5.596077411 |
| 1445274_at   | 0.031464574  | 5.772958749 | 0.272611879  | 0.791043362 | 0.791043362 | -5.596085488 |
| 1453928_a_at | 0.025486912  | 10.08258024 | 0.272593281  | 0.791057232 | 0.791057232 | -5.596090348 |
| 1458722_at   | -0.041814898 | 4.308977869 | -0.272541644 | 0.791095745 | 0.791095745 | -5.596103841 |
| 1442326_at   | -0.020385719 | 3.937493184 | -0.272535264 | 0.791100503 | 0.791100503 | -5.596105508 |
| 1442555_at   | 0.032789509  | 4.420779864 | 0.272475875  | 0.791144798 | 0.791144798 | -5.596121023 |
| 1421732_at   | 0.020227554  | 3.786299692 | 0.272407011  | 0.791196161 | 0.791196161 | -5.59613901  |
| 1444809_at   | -0.021704688 | 4.393495035 | -0.272405587 | 0.791197223 | 0.791197223 | -5.596139381 |
| 1459988_at   | -0.025937061 | 3.796897796 | -0.272391647 | 0.79120762  | 0.79120762  | -5.596143022 |
| 1419778_at   | 0.01676127   | 3.529024892 | 0.272354073  | 0.791235645 | 0.791235645 | -5.596152833 |
| 1424324_at   | -0.020812561 | 8.711315281 | -0.272344699 | 0.791242637 | 0.791242637 | -5.596155281 |
| 1441758_at   | 0.024188796  | 3.565709084 | 0.27230321   | 0.791273584 | 0.791273584 | -5.596166113 |
| 1435013_at   | -0.020732335 | 8.120147289 | -0.272242987 | 0.791318503 | 0.791318503 | -5.596181833 |
| 1460746_at   | -0.017924451 | 3.869681835 | -0.272194077 | 0.791354985 | 0.791354985 | -5.596194597 |
| 1449083_at   | 0.025353041  | 7.959005291 | 0.272188215  | 0.791359358 | 0.791359358 | -5.596196127 |
| 1422267_at   | -0.02568596  | 4.899965265 | -0.272179044 | 0.791366199 | 0.791366199 | -5.59619852  |
| 1433811_at   | -0.025546673 | 8.735610603 | -0.272160829 | 0.791379785 | 0.791379785 | -5.596203273 |
| 1416297_s_at | 0.018809407  | 4.318264889 | 0.272157942  | 0.791381939 | 0.791381939 | -5.596204026 |
| 1447543_at   | -0.027908119 | 3.986309168 | -0.272121004 | 0.791409492 | 0.791409492 | -5.596213663 |
| 1451000_at   | -0.023227368 | 10.03992657 | -0.272097901 | 0.791426725 | 0.791426725 | -5.59621969  |
| 1416797_at   | -0.033388056 | 6.414728364 | -0.27201984  | 0.791484954 | 0.791484954 | -5.596240051 |
| 1440812_at   | 0.025992619  | 3.030318945 | 0.271974973  | 0.791518423 | 0.791518423 | -5.596251751 |
| 1457147_at   | 0.033377853  | 6.835492176 | 0.271972461  | 0.791520297 | 0.791520297 | -5.596252406 |
| 1432107_at   | 0.026416171  | 3.582484596 | 0.271907422  | 0.791568814 | 0.791568814 | -5.596269363 |
| 1450323_at   | 0.026781255  | 6.477473395 | 0.271869764  | 0.791596906 | 0.791596906 | -5.596279179 |
| 1440179_x_at | 0.025453701  | 9.423719531 | 0.27185691   | 0.791606495 | 0.791606495 | -5.596282529 |
| 1447226_at   | 0.020913768  | 6.607423071 | 0.271855609  | 0.791607465 | 0.791607465 | -5.596282868 |
| 1459189_at   | 0.032629095  | 3.982972761 | 0.271819271  | 0.791634573 | 0.791634573 | -5.596292338 |
| 1456422_at   | -0.022078216 | 4.836066448 | -0.271788197 | 0.791657754 | 0.791657754 | -5.596300436 |
| 1439398_x_at | -0.021708833 | 8.637477917 | -0.27172615  | 0.791704041 | 0.791704041 | -5.596316602 |
| 1450957_a_at | -0.022315499 | 10.06947524 | -0.271610934 | 0.791789996 | 0.791789996 | -5.596346611 |
| 1453552_at   | -0.018715206 | 3.714439858 | -0.271604116 | 0.791795082 | 0.791795082 | -5.596348386 |
| 1434110_x_at | -0.020823134 | 7.593524355 | -0.27152289  | 0.791855682 | 0.791855682 | -5.596369535 |

|              |              |             |              |             |             |              |
|--------------|--------------|-------------|--------------|-------------|-------------|--------------|
| 1426358_at   | -0.022194834 | 9.20220767  | -0.271517279 | 0.791859868 | 0.791859868 | -5.596370995 |
| 1452141_a_at | -0.021047975 | 11.2996812  | -0.271510932 | 0.791864602 | 0.791864602 | -5.596372647 |
| 1444301_at   | 0.021422031  | 3.68338768  | 0.271480342  | 0.791887425 | 0.791887425 | -5.59638061  |
| 1453921_at   | 0.026263168  | 3.421887979 | 0.271422688  | 0.791930439 | 0.791930439 | -5.596395615 |
| 1419651_at   | -0.02539017  | 5.152777216 | -0.271375626 | 0.791965551 | 0.791965551 | -5.59640786  |
| 1426969_at   | -0.031677336 | 8.038324465 | -0.271361313 | 0.79197623  | 0.79197623  | -5.596411584 |
| 1421364_at   | -0.031336365 | 6.316707334 | -0.271328683 | 0.792000575 | 0.792000575 | -5.596420073 |
| 1431198_x_at | -0.021611972 | 6.11792447  | -0.271297714 | 0.792023681 | 0.792023681 | -5.596428129 |
| 1430863_at   | 0.034712979  | 3.632334062 | 0.271293091  | 0.792027131 | 0.792027131 | -5.596429331 |
| 1432697_at   | 0.030273669  | 3.637612302 | 0.271283459  | 0.792034318 | 0.792034318 | -5.596431837 |
| 1424384_a_at | 0.022109939  | 8.046810814 | 0.271265913  | 0.792047409 | 0.792047409 | -5.5964364   |
| 1445026_at   | 0.020251639  | 3.469864647 | 0.27126365   | 0.792049097 | 0.792049097 | -5.596436989 |
| 1450189_at   | -0.027142175 | 3.955348801 | -0.2712412   | 0.792065847 | 0.792065847 | -5.596442827 |
| 1442705_at   | 0.025521801  | 3.821766723 | 0.271198489  | 0.792097716 | 0.792097716 | -5.596453934 |
| 1424294_at   | 0.017477245  | 9.50915956  | 0.271182981  | 0.792109287 | 0.792109287 | -5.596457966 |
| 1436151_x_at | 0.020308576  | 8.191361186 | 0.271178609  | 0.792112549 | 0.792112549 | -5.596459103 |
| 1440129_at   | 0.035156779  | 5.131755527 | 0.271152162  | 0.792132282 | 0.792132282 | -5.596465979 |
| 1457408_at   | 0.021281264  | 4.752753404 | 0.271096344  | 0.79217393  | 0.79217393  | -5.596480488 |
| 1460659_at   | 0.01833434   | 4.890047415 | 0.271086574  | 0.79218122  | 0.79218122  | -5.596483028 |
| 1442238_a_at | 0.027301007  | 5.731967536 | 0.271026935  | 0.792225721 | 0.792225721 | -5.596498527 |
| 1444236_at   | -0.025244213 | 5.786473328 | -0.270985613 | 0.792256554 | 0.792256554 | -5.596509264 |
| 1451833_a_at | 0.021026496  | 9.049939278 | 0.270961424  | 0.792274604 | 0.792274604 | -5.596515548 |
| 1433245_at   | 0.019122892  | 4.264564897 | 0.270809047  | 0.792388307 | 0.792388307 | -5.596555124 |
| 1443366_at   | -0.024823564 | 6.329397184 | -0.270784464 | 0.792406652 | 0.792406652 | -5.596561507 |
| 1447932_at   | -0.016435176 | 3.501797632 | -0.270737168 | 0.792441946 | 0.792441946 | -5.596573785 |
| 1430847_a_at | 0.021758486  | 4.034343401 | 0.270672372  | 0.7924903   | 0.7924903   | -5.596590603 |
| 1458591_at   | -0.017966324 | 3.31397606  | -0.270650891 | 0.79250633  | 0.79250633  | -5.596596177 |
| 1459720_x_at | 0.091132565  | 5.394707173 | 0.270642992  | 0.792512224 | 0.792512224 | -5.596598227 |
| 1416104_at   | -0.01679158  | 8.254778725 | -0.270629926 | 0.792521975 | 0.792521975 | -5.596601618 |
| 1453846_at   | -0.019319212 | 6.603642985 | -0.270597394 | 0.792546252 | 0.792546252 | -5.596610059 |
| 1443234_at   | -0.027830057 | 4.746959935 | -0.270585294 | 0.792555282 | 0.792555282 | -5.596613198 |
| 1454052_at   | 0.022733057  | 4.340379338 | 0.270584728  | 0.792555704 | 0.792555704 | -5.596613345 |
| 1428372_at   | -0.021361648 | 8.767158061 | -0.270541497 | 0.792587966 | 0.792587966 | -5.596624559 |
| 1430691_at   | 0.025630236  | 3.601082221 | 0.270533197  | 0.792594161 | 0.792594161 | -5.596626713 |
| 1427374_at   | 0.027488751  | 4.320023172 | 0.270504446  | 0.792615617 | 0.792615617 | -5.59663417  |
| 1419322_at   | -0.027139461 | 5.383634134 | -0.270493101 | 0.792624084 | 0.792624084 | -5.596637112 |
| 1426449_a_at | -0.017899517 | 9.322556191 | -0.270485212 | 0.792629971 | 0.792629971 | -5.596639158 |
| 1435207_at   | -0.021633583 | 9.422351881 | -0.270443264 | 0.792661277 | 0.792661277 | -5.596650037 |
| 1443905_at   | 0.021023761  | 7.338100366 | 0.270425076  | 0.792674851 | 0.792674851 | -5.596654753 |
| 1422292_at   | -0.020606578 | 5.188073969 | -0.270417231 | 0.792680706 | 0.792680706 | -5.596656787 |
| 1446745_at   | -0.021369045 | 4.112153646 | -0.270414425 | 0.792682799 | 0.792682799 | -5.596657514 |
| 1443696_s_at | -0.028158389 | 5.1400658   | -0.270336469 | 0.792740979 | 0.792740979 | -5.596677724 |
| 1458352_at   | -0.023544353 | 4.440084635 | -0.270266515 | 0.792793188 | 0.792793188 | -5.596695854 |
| 1431257_at   | -0.027519772 | 4.404553044 | -0.270250677 | 0.792805009 | 0.792805009 | -5.596699958 |
| 1434618_at   | -0.027005596 | 8.539478179 | -0.270213007 | 0.792833123 | 0.792833123 | -5.596709718 |
| 1449210_at   | -0.025380217 | 6.258993926 | -0.270163038 | 0.792870418 | 0.792870418 | -5.596722664 |
| 1452881_at   | 0.019412236  | 8.281680031 | 0.270147463  | 0.792882042 | 0.792882042 | -5.596726698 |
| 1418299_at   | -0.040587662 | 6.452642813 | -0.270123774 | 0.792899724 | 0.792899724 | -5.596732834 |
| 1438571_at   | 0.057367565  | 4.806673075 | 0.270119112  | 0.792903203 | 0.792903203 | -5.596734041 |
| 1451684_a_at | -0.031213392 | 4.306055719 | -0.270117958 | 0.792904064 | 0.792904064 | -5.59673434  |
| 1425454_a_at | -0.018802678 | 3.809675746 | -0.270078471 | 0.792933536 | 0.792933536 | -5.596744567 |
| 1454033_at   | 0.02556155   | 3.451450457 | 0.27003665   | 0.792964751 | 0.792964751 | -5.596755396 |
| 1417208_at   | 0.165415917  | 7.607515825 | 0.270028415  | 0.792970898 | 0.792970898 | -5.596757528 |

|              |              |             |              |             |             |              |
|--------------|--------------|-------------|--------------|-------------|-------------|--------------|
| 1423577_at   | -0.02736256  | 8.484256481 | -0.270010816 | 0.792984033 | 0.792984033 | -5.596762084 |
| 1426723_at   | 0.017382768  | 9.131994547 | 0.270000066  | 0.792992057 | 0.792992057 | -5.596764868 |
| 1445687_at   | -0.024392062 | 4.093845045 | -0.26997968  | 0.793007273 | 0.793007273 | -5.596770145 |
| 1427701_a_at | -0.02191726  | 4.134990573 | -0.269948143 | 0.793030813 | 0.793030813 | -5.596778309 |
| 1441578_at   | -0.025814371 | 5.936130555 | -0.269946453 | 0.793032074 | 0.793032074 | -5.596778746 |
| 1419468_at   | 0.034820075  | 5.830310533 | 0.269850402  | 0.793103769 | 0.793103769 | -5.596803603 |
| 1432080_s_at | 0.016890722  | 7.850584781 | 0.269835378  | 0.793114983 | 0.793114983 | -5.596807491 |
| 1426232_at   | -0.022367876 | 8.421072958 | -0.269825888 | 0.793122067 | 0.793122067 | -5.596809946 |
| 1427711_a_at | -0.017258829 | 3.943026027 | -0.269812639 | 0.793131956 | 0.793131956 | -5.596813374 |
| 1432469_at   | -0.018810689 | 3.828459716 | -0.269714463 | 0.79320524  | 0.79320524  | -5.596838768 |
| 1419859_at   | 0.01821704   | 3.216498859 | 0.269657161  | 0.793248014 | 0.793248014 | -5.596853586 |
| 1426772_x_at | 0.022993705  | 5.094198454 | 0.269584765  | 0.793302056 | 0.793302056 | -5.596872303 |
| 1447869_x_at | 0.061004107  | 8.332409476 | 0.26951043   | 0.793357547 | 0.793357547 | -5.596891516 |
| 1453322_at   | 0.020747979  | 7.448950671 | 0.269424827  | 0.793421451 | 0.793421451 | -5.596913634 |
| 1439541_at   | 0.033804212  | 6.282756057 | 0.269410108  | 0.793432439 | 0.793432439 | -5.596917437 |
| 1426421_s_at | -0.018601727 | 8.119466845 | -0.269330704 | 0.793491717 | 0.793491717 | -5.596937946 |
| 1440053_at   | 0.025254633  | 4.405274755 | 0.269311361  | 0.793506157 | 0.793506157 | -5.596942941 |
| 1458607_at   | 0.034270631  | 4.698036528 | 0.269250139  | 0.793551863 | 0.793551863 | -5.59695875  |
| 1453486_a_at | -0.035408077 | 5.938475436 | -0.269235675 | 0.793562662 | 0.793562662 | -5.596962484 |
| 1426368_at   | -0.041011018 | 8.189631649 | -0.269229362 | 0.793567375 | 0.793567375 | -5.596964114 |
| 1436714_at   | -0.023519581 | 10.06296329 | -0.269186521 | 0.793599359 | 0.793599359 | -5.596975173 |
| 1422347_at   | -0.022988313 | 3.566882959 | -0.269156916 | 0.793621461 | 0.793621461 | -5.596982814 |
| 1435658_at   | 0.029460725  | 7.184879435 | 0.268941994  | 0.793781924 | 0.793781924 | -5.597038262 |
| 1433946_at   | 0.026605634  | 7.64820293  | 0.268931322  | 0.793789891 | 0.793789891 | -5.597041014 |
| 1439341_at   | -0.024346806 | 7.886875235 | -0.268929459 | 0.793791283 | 0.793791283 | -5.597041495 |
| 1457220_at   | -0.028137607 | 4.473428792 | -0.268903402 | 0.793810738 | 0.793810738 | -5.597048214 |
| 1451578_at   | -0.035027798 | 5.193602061 | -0.268853643 | 0.793847891 | 0.793847891 | -5.597061044 |
| 1448156_at   | -0.01764977  | 8.425398827 | -0.268841169 | 0.793857204 | 0.793857204 | -5.597064259 |
| 1446897_at   | -0.024174443 | 3.875348275 | -0.268826525 | 0.793868138 | 0.793868138 | -5.597068034 |
| 1421108_at   | 0.021600105  | 3.719694079 | 0.268819075  | 0.7938737   | 0.7938737   | -5.597069955 |
| 1426224_x_at | 0.019242971  | 3.292208353 | 0.26872778   | 0.793941868 | 0.793941868 | -5.597093485 |
| 1428507_at   | -0.030705899 | 8.579133261 | -0.268685795 | 0.793973217 | 0.793973217 | -5.597104303 |
| 1426301_at   | 0.02144253   | 10.89871388 | 0.268606592  | 0.794032358 | 0.794032358 | -5.597124706 |
| 1428783_at   | -0.037950587 | 9.145935811 | -0.268557813 | 0.794068782 | 0.794068782 | -5.59713727  |
| 1430915_at   | -0.018926581 | 4.48122008  | -0.268489159 | 0.794120048 | 0.794120048 | -5.597154948 |
| 1436673_at   | 0.027142669  | 5.989635264 | 0.268443267  | 0.794154317 | 0.794154317 | -5.597166762 |
| 1439802_at   | -0.031280525 | 6.721201719 | -0.268427422 | 0.794166148 | 0.794166148 | -5.597170841 |
| 1458428_at   | -0.017869426 | 3.840544843 | -0.26842729  | 0.794166247 | 0.794166247 | -5.597170875 |
| 1432730_at   | 0.020221412  | 4.784106522 | 0.268392347  | 0.794192341 | 0.794192341 | -5.597179869 |
| 1419452_at   | 0.018836075  | 9.183849755 | 0.268330447  | 0.794238565 | 0.794238565 | -5.597195799 |
| 1429626_at   | -0.02167039  | 3.425112139 | -0.268310027 | 0.794253814 | 0.794253814 | -5.597201053 |
| 1458098_at   | 0.021144413  | 3.93420096  | 0.268298613  | 0.794262338 | 0.794262338 | -5.597203989 |
| 1418023_at   | 0.027029782  | 9.528526429 | 0.268279968  | 0.794276261 | 0.794276261 | -5.597208786 |
| 1427154_at   | -0.023263237 | 3.343947912 | -0.268252572 | 0.794296721 | 0.794296721 | -5.597215834 |
| 1435116_at   | -0.028616905 | 4.968182638 | -0.268250545 | 0.794298234 | 0.794298234 | -5.597216355 |
| 1438850_at   | 0.026406788  | 3.059863398 | 0.268192839  | 0.794341328 | 0.794341328 | -5.597231198 |
| 1428629_at   | 0.036743512  | 7.047083757 | 0.268172788  | 0.794356302 | 0.794356302 | -5.597236355 |
| 1451984_at   | -0.02051563  | 10.35722198 | -0.268158827 | 0.794366728 | 0.794366728 | -5.597239945 |
| 1452574_x_at | -0.018845109 | 3.290627267 | -0.268135411 | 0.794384216 | 0.794384216 | -5.597245966 |
| 1415680_at   | 0.016235334  | 9.456848617 | 0.268130785  | 0.794387671 | 0.794387671 | -5.597247156 |
| 1442154_at   | 0.021767503  | 6.160647944 | 0.268124216  | 0.794392576 | 0.794392576 | -5.597248845 |
| 1422872_at   | -0.019331778 | 4.067910359 | -0.268091977 | 0.794416653 | 0.794416653 | -5.597257133 |
| 1422895_at   | -0.022034296 | 9.528602243 | -0.268043578 | 0.794452798 | 0.794452798 | -5.597269575 |

|              |              |             |              |             |             |              |
|--------------|--------------|-------------|--------------|-------------|-------------|--------------|
| 1451685_at   | -0.032186398 | 4.653652641 | -0.267995975 | 0.79448835  | 0.79448835  | -5.59728181  |
| 1426800_at   | 0.0257112    | 4.499113829 | 0.267954609  | 0.794519244 | 0.794519244 | -5.597292441 |
| 1440987_at   | -0.019536795 | 5.28823499  | -0.267926877 | 0.794539956 | 0.794539956 | -5.597299566 |
| 1458348_at   | -0.026427481 | 4.010178083 | -0.267851516 | 0.79459624  | 0.79459624  | -5.597318926 |
| 1435958_at   | -0.018837218 | 6.385216014 | -0.26784645  | 0.794600024 | 0.794600024 | -5.597320228 |
| 1416906_at   | -0.019243072 | 11.77938403 | -0.267822052 | 0.794618246 | 0.794618246 | -5.597326494 |
| 1437634_at   | -0.018974313 | 8.81163521  | -0.267759521 | 0.794664949 | 0.794664949 | -5.597342552 |
| 1447970_at   | -0.020392936 | 6.677203894 | -0.26773739  | 0.794681479 | 0.794681479 | -5.597348235 |
| 1426560_a_at | 0.037796     | 7.103895225 | 0.267719882  | 0.794694556 | 0.794694556 | -5.59735273  |
| 1449103_at   | -0.025398884 | 4.022749325 | -0.26766972  | 0.794732022 | 0.794732022 | -5.597365607 |
| 1427966_at   | -0.024914753 | 7.747266675 | -0.267650406 | 0.794746448 | 0.794746448 | -5.597370565 |
| 1454076_at   | 0.024042026  | 3.978295074 | 0.267559658  | 0.79481423  | 0.79481423  | -5.597393854 |
| 1426619_at   | 0.019722121  | 3.675057106 | 0.267557488  | 0.794815851 | 0.794815851 | -5.59739441  |
| 1446116_at   | -0.017036354 | 3.824869295 | -0.267548968 | 0.794822215 | 0.794822215 | -5.597396597 |
| 1457941_at   | 0.026987222  | 4.138524136 | 0.267533456  | 0.794833801 | 0.794833801 | -5.597400576 |
| 1439470_at   | -0.021796679 | 6.212794555 | -0.267469842 | 0.794881317 | 0.794881317 | -5.597416895 |
| 1455472_at   | 0.023286848  | 8.204301109 | 0.267351269  | 0.794969888 | 0.794969888 | -5.597447303 |
| 1434389_at   | 0.021869898  | 9.042736918 | 0.267294557  | 0.795012251 | 0.795012251 | -5.597461842 |
| 1425477_x_at | -0.021427771 | 4.654895407 | -0.267279699 | 0.795023349 | 0.795023349 | -5.597465651 |
| 1446706_at   | 0.021149366  | 4.149643669 | 0.267270557  | 0.795030179 | 0.795030179 | -5.597467994 |
| 1445476_at   | -0.021454673 | 3.4412331   | -0.267270539 | 0.795030192 | 0.795030192 | -5.597467999 |
| 1417082_at   | 0.017075973  | 11.88807904 | 0.267260443  | 0.795037734 | 0.795037734 | -5.597470586 |
| 1459340_at   | -0.020956905 | 4.087674398 | -0.267236273 | 0.795055789 | 0.795055789 | -5.597476781 |
| 1438101_at   | 0.016927991  | 3.750150292 | 0.267200799  | 0.795082289 | 0.795082289 | -5.597485872 |
| 1430811_a_at | 0.026082804  | 8.507477403 | 0.267169318  | 0.795105805 | 0.795105805 | -5.597493938 |
| 1419935_s_at | 0.024320085  | 7.568545832 | 0.267153515  | 0.795117611 | 0.795117611 | -5.597497987 |
| 1425311_at   | 0.02430096   | 6.758674335 | 0.267125313  | 0.795138679 | 0.795138679 | -5.597505213 |
| 1432744_at   | 0.021054483  | 4.509852243 | 0.26706465   | 0.795183996 | 0.795183996 | -5.597520751 |
| 1419561_at   | 0.025301751  | 3.509722535 | 0.267039872  | 0.795202506 | 0.795202506 | -5.597527097 |
| 1418242_at   | -0.01945958  | 9.208389155 | -0.267037633 | 0.795204179 | 0.795204179 | -5.597527671 |
| 1450788_at   | -0.018728376 | 3.325873245 | -0.267015993 | 0.795220345 | 0.795220345 | -5.597533212 |
| 1434661_at   | 0.024502399  | 7.198630866 | 0.267001333  | 0.795231297 | 0.795231297 | -5.597536966 |
| 1453109_at   | -0.086864048 | 7.315441523 | -0.26695502  | 0.795265896 | 0.795265896 | -5.597548824 |
| 1429764_at   | 0.026471165  | 9.841465038 | 0.266916084  | 0.795294984 | 0.795294984 | -5.597558792 |
| 1452361_at   | -0.026334361 | 7.123802192 | -0.266839932 | 0.795351876 | 0.795351876 | -5.597578283 |
| 1453190_at   | 0.020751161  | 6.97117793  | 0.266826065  | 0.795362235 | 0.795362235 | -5.597581831 |
| 1416137_at   | -0.021128683 | 7.299654655 | -0.266818977 | 0.795367531 | 0.795367531 | -5.597583645 |
| 1443023_at   | -0.020428308 | 5.281388698 | -0.266813272 | 0.795371794 | 0.795371794 | -5.597585105 |
| 1437612_at   | -0.022077754 | 4.633020444 | -0.266790094 | 0.795389109 | 0.795389109 | -5.597591035 |
| 1454206_a_at | -0.025535369 | 6.334828913 | -0.266664047 | 0.795483282 | 0.795483282 | -5.597623279 |
| 1456093_at   | 0.028776114  | 5.468183286 | 0.266610929  | 0.795522968 | 0.795522968 | -5.597636862 |
| 1459249_at   | -0.027724485 | 3.843667755 | -0.266609331 | 0.795524162 | 0.795524162 | -5.59763727  |
| 1447669_s_at | -0.033585746 | 6.202609544 | -0.266606023 | 0.795526633 | 0.795526633 | -5.597638116 |
| 1416510_at   | -0.018244721 | 9.204662974 | -0.266589846 | 0.79553872  | 0.79553872  | -5.597642252 |
| 1451911_a_at | 0.022539361  | 6.234138075 | 0.266558224  | 0.795562347 | 0.795562347 | -5.597650337 |
| 1457314_at   | -0.024474928 | 4.661491467 | -0.26654005  | 0.795575926 | 0.795575926 | -5.597654983 |
| 1426631_at   | -0.019090842 | 9.214006747 | -0.266487679 | 0.795615056 | 0.795615056 | -5.597668369 |
| 1441264_x_at | 0.027352232  | 7.433240696 | 0.266468027  | 0.795629739 | 0.795629739 | -5.597673391 |
| 1450048_a_at | -0.017581449 | 10.69634742 | -0.266449261 | 0.79564376  | 0.79564376  | -5.597678187 |
| 1416729_at   | -0.020515162 | 3.970829035 | -0.266390671 | 0.795687538 | 0.795687538 | -5.597693158 |
| 1454737_at   | 0.029893412  | 4.506410657 | 0.266389104  | 0.795688709 | 0.795688709 | -5.597693558 |
| 1453392_at   | -0.027990541 | 4.493223588 | -0.26637651  | 0.795698118 | 0.795698118 | -5.597696775 |
| 1458879_at   | -0.022623769 | 4.794136801 | -0.266367362 | 0.795704954 | 0.795704954 | -5.597699112 |



|                  |              |             |              |             |             |              |
|------------------|--------------|-------------|--------------|-------------|-------------|--------------|
| 1430054_at       | 0.026977015  | 3.7047467   | 0.266317656  | 0.795742095 | 0.795742095 | -5.597711809 |
| 1452600_at       | 0.027430202  | 6.821714399 | 0.266290504  | 0.795762383 | 0.795762383 | -5.597718744 |
| 1451591_a_at     | -0.020439926 | 8.118083048 | -0.266288585 | 0.795763817 | 0.795763817 | -5.597719234 |
| 1441303_at       | -0.020979186 | 5.205816164 | -0.266268218 | 0.795779035 | 0.795779035 | -5.597724436 |
| 1425246_at       | 0.032257931  | 5.339785243 | 0.266243558  | 0.795797462 | 0.795797462 | -5.597730733 |
| 1457374_at       | 0.030721473  | 7.600786114 | 0.266235145  | 0.795803748 | 0.795803748 | -5.597732881 |
| AFFX-GapdhMur/M3 | -0.019056202 | 12.81939633 | -0.266232132 | 0.795805999 | 0.795805999 | -5.59773365  |
| 1417891_at       | -0.019529696 | 7.833275562 | -0.266147484 | 0.795869252 | 0.795869252 | -5.597755261 |
| 1454531_at       | 0.023604488  | 3.528949795 | 0.265968482  | 0.796003013 | 0.796003013 | -5.597800937 |
| 1440170_at       | -0.019298578 | 3.053574964 | -0.265897206 | 0.796056278 | 0.796056278 | -5.597819116 |
| 1446814_at       | 0.022918931  | 5.662716978 | 0.265875213  | 0.796072712 | 0.796072712 | -5.597824724 |
| 1432853_at       | -0.020851982 | 5.779158095 | -0.265868452 | 0.796077765 | 0.796077765 | -5.597826449 |
| 1458186_at       | 0.028202919  | 6.218434115 | 0.265831689  | 0.796105239 | 0.796105239 | -5.597835822 |
| 1445100_at       | -0.026045312 | 4.172271382 | -0.265740749 | 0.7961732   | 0.7961732   | -5.597859004 |
| 1433688_x_at     | 0.019008487  | 12.77980606 | 0.265662659  | 0.79623156  | 0.79623156  | -5.597878905 |
| 1417071_s_at     | 0.029880687  | 5.665331066 | 0.265607221  | 0.796272992 | 0.796272992 | -5.597893029 |
| 1427955_a_at     | -0.022728611 | 8.694942425 | -0.265585249 | 0.796289413 | 0.796289413 | -5.597898626 |
| 1439627_at       | 0.021838306  | 3.208856476 | 0.265545532  | 0.796319097 | 0.796319097 | -5.597908742 |
| 1448581_at       | 0.022380285  | 7.399229729 | 0.265483759  | 0.796365265 | 0.796365265 | -5.597924473 |
| 1459592_a_at     | 0.024665768  | 8.485719563 | 0.265431525  | 0.796404304 | 0.796404304 | -5.597937772 |
| 1424565_at       | -0.025089991 | 7.860781968 | -0.265408933 | 0.796421189 | 0.796421189 | -5.597943523 |
| 1427396_a_at     | 0.016510182  | 12.1420788  | 0.265404728  | 0.796424332 | 0.796424332 | -5.597944594 |
| 1419230_at       | 0.019619542  | 3.614945356 | 0.265341542  | 0.796471559 | 0.796471559 | -5.597960676 |
| 1441489_at       | 0.025838864  | 6.060506449 | 0.265310632  | 0.796494661 | 0.796494661 | -5.597968542 |
| 1428958_at       | -0.029273469 | 5.948714189 | -0.265290881 | 0.796509424 | 0.796509424 | -5.597973568 |
| 1417089_a_at     | -0.022807141 | 4.5838848   | -0.265242037 | 0.796545932 | 0.796545932 | -5.597985995 |
| 1458711_at       | -0.034669487 | 5.589983265 | -0.265227613 | 0.796556713 | 0.796556713 | -5.597989665 |
| 1435690_at       | 0.019900014  | 9.074747117 | 0.265173192  | 0.79659739  | 0.79659739  | -5.598003507 |
| 1440851_at       | -0.057105847 | 8.063695456 | -0.26516097  | 0.796606525 | 0.796606525 | -5.598006616 |
| 1444469_at       | -0.029593478 | 4.969935237 | -0.265113802 | 0.796641782 | 0.796641782 | -5.598018611 |
| 1457646_at       | 0.028013736  | 3.44869184  | 0.265094359  | 0.796656314 | 0.796656314 | -5.598023555 |
| 1452004_at       | -0.089752704 | 6.692442474 | -0.265043774 | 0.796694126 | 0.796694126 | -5.598036415 |
| 1447538_at       | 0.020557658  | 6.495616476 | 0.264952721  | 0.796762188 | 0.796762188 | -5.598059559 |
| 1451292_at       | -0.01800889  | 8.234640826 | -0.264889405 | 0.796809517 | 0.796809517 | -5.598075647 |
| 1433474_at       | 0.04981911   | 6.686694765 | 0.26486084   | 0.79683087  | 0.79683087  | -5.598082904 |
| 1429478_at       | -0.020784029 | 8.574581749 | -0.264761127 | 0.796905409 | 0.796905409 | -5.598108231 |
| 1443560_at       | 0.026334375  | 5.291618234 | 0.264732883  | 0.796926523 | 0.796926523 | -5.598115403 |
| 1431038_at       | -0.020258466 | 5.208288709 | -0.264726091 | 0.7969316   | 0.7969316   | -5.598117128 |
| 1436011_at       | -0.018012797 | 6.728915635 | -0.264656103 | 0.796983921 | 0.796983921 | -5.598134897 |
| 1448325_at       | 0.017805015  | 7.960605129 | 0.264639819  | 0.796996095 | 0.796996095 | -5.59813903  |
| 1415866_at       | 0.02502839   | 7.107305902 | 0.26461952   | 0.797011269 | 0.797011269 | -5.598144183 |
| 1444950_at       | 0.029001221  | 4.055517693 | 0.264571118  | 0.797047453 | 0.797047453 | -5.598156467 |
| 1443595_at       | -0.023349661 | 3.217513071 | -0.264570902 | 0.797047615 | 0.797047615 | -5.598156521 |
| 1452950_at       | -0.020949387 | 4.308493057 | -0.264529622 | 0.797078476 | 0.797078476 | -5.598166996 |
| 1454906_at       | -0.059693527 | 7.264601102 | -0.264512348 | 0.79709139  | 0.79709139  | -5.598171379 |
| 1453375_at       | 0.025024258  | 5.242933337 | 0.264406118  | 0.797170809 | 0.797170809 | -5.598198326 |
| 1452129_at       | 0.019624436  | 3.942923713 | 0.26436675   | 0.797200241 | 0.797200241 | -5.598208309 |
| 1441135_at       | -0.031821712 | 4.859351614 | -0.264348051 | 0.797214221 | 0.797214221 | -5.598213051 |
| 1450925_a_at     | -0.021973301 | 11.63200592 | -0.26434695  | 0.797215045 | 0.797215045 | -5.59821333  |
| 1447844_at       | -0.036272876 | 4.282136158 | -0.26430321  | 0.797247746 | 0.797247746 | -5.59822442  |
| 1423920_at       | -0.016769151 | 8.570970745 | -0.26428048  | 0.797264741 | 0.797264741 | -5.598230182 |
| 1459399_at       | 0.022675714  | 3.590957593 | 0.264275861  | 0.797268194 | 0.797268194 | -5.598231353 |
| 1420484_a_at     | -0.02981911  | 4.109873924 | -0.26427312  | 0.797270243 | 0.797270243 | -5.598232048 |

|              |              |             |              |             |             |              |
|--------------|--------------|-------------|--------------|-------------|-------------|--------------|
| 1445662_x_at | -0.026669006 | 6.486310865 | -0.264245061 | 0.797291222 | 0.797291222 | -5.59823916  |
| 1433358_at   | 0.020034124  | 4.13909716  | 0.264150753  | 0.797361733 | 0.797361733 | -5.598263059 |
| 1459177_at   | -0.030559974 | 4.486134386 | -0.26413583  | 0.797372891 | 0.797372891 | -5.59826684  |
| 1438270_at   | -0.038104112 | 6.499224754 | -0.264129505 | 0.79737762  | 0.79737762  | -5.598268443 |
| 1456079_x_at | 0.018856128  | 10.02535453 | 0.264104072  | 0.797396635 | 0.797396635 | -5.598274886 |
| 1433093_at   | 0.01767725   | 4.080908876 | 0.264061313  | 0.797428607 | 0.797428607 | -5.598285717 |
| 1453315_at   | 0.019220001  | 4.64934641  | 0.264034623  | 0.797448562 | 0.797448562 | -5.598292477 |
| 1431457_at   | -0.02199182  | 3.57984217  | -0.263987331 | 0.797483923 | 0.797483923 | -5.598304453 |
| 1433580_at   | -0.016737777 | 9.031404843 | -0.263968421 | 0.797498062 | 0.797498062 | -5.598309242 |
| 1439960_at   | -0.02284314  | 5.091868828 | -0.263949589 | 0.797512143 | 0.797512143 | -5.59831401  |
| 1428369_s_at | 0.019400818  | 9.347629689 | 0.263919279  | 0.797534807 | 0.797534807 | -5.598321683 |
| 1416975_at   | 0.019854838  | 6.928921658 | 0.263852569  | 0.797584688 | 0.797584688 | -5.598338569 |
| 1453229_s_at | 0.020220825  | 11.40905092 | 0.263832543  | 0.797599663 | 0.797599663 | -5.598343638 |
| 1452331_s_at | 0.019927912  | 8.353563545 | 0.26383026   | 0.79760137  | 0.79760137  | -5.598344215 |
| 1422880_at   | -0.020024945 | 9.924556515 | -0.263798834 | 0.797624869 | 0.797624869 | -5.598352168 |
| 1423826_at   | -0.021347419 | 8.578293687 | -0.263746396 | 0.79766408  | 0.79766408  | -5.598365435 |
| 1448953_at   | 0.020496041  | 8.076134625 | 0.263726201  | 0.797679181 | 0.797679181 | -5.598370545 |
| 1438516_at   | 0.02821936   | 7.917949527 | 0.263717342  | 0.797685806 | 0.797685806 | -5.598372786 |
| 1428526_at   | -0.016713864 | 9.836419421 | -0.263717021 | 0.797686046 | 0.797686046 | -5.598372867 |
| 1430636_at   | -0.01935311  | 4.956152432 | -0.263668689 | 0.797722187 | 0.797722187 | -5.598385092 |
| 1426502_s_at | 0.019466364  | 7.412768414 | 0.263648704  | 0.797737132 | 0.797737132 | -5.598390146 |
| 1448643_at   | -0.020394165 | 10.23293591 | -0.263634116 | 0.797748041 | 0.797748041 | -5.598393836 |
| 1429516_at   | -0.023282565 | 5.226288419 | -0.263590177 | 0.797780898 | 0.797780898 | -5.598404946 |
| 1452293_at   | -0.018175138 | 6.893120133 | -0.263563964 | 0.7978005   | 0.7978005   | -5.598411574 |
| 1432625_at   | 0.024029452  | 3.999203782 | 0.263561315  | 0.797802481 | 0.797802481 | -5.598412243 |
| 1416254_a_at | -0.01642444  | 8.754520516 | -0.263509432 | 0.79784128  | 0.79784128  | -5.598425359 |
| 1424963_at   | 0.018475697  | 3.210526925 | 0.263449674  | 0.797885968 | 0.797885968 | -5.598440462 |
| 1420669_at   | -0.033630534 | 5.00561253  | -0.263447289 | 0.797887752 | 0.797887752 | -5.598441065 |
| 1447222_at   | -0.018519278 | 4.017646335 | -0.263444679 | 0.797889704 | 0.797889704 | -5.598441725 |
| 1437391_x_at | 0.031674768  | 8.473631889 | 0.263417278  | 0.797910195 | 0.797910195 | -5.598448649 |
| 1416014_at   | -0.020528538 | 9.887704146 | -0.263368229 | 0.797946876 | 0.797946876 | -5.598461041 |
| 1436706_at   | 0.02060742   | 7.590772004 | 0.263361163  | 0.79795216  | 0.79795216  | -5.598462826 |
| 1443316_at   | -0.020122261 | 3.691154052 | -0.26336106  | 0.797952237 | 0.797952237 | -5.598462852 |
| 1417959_at   | 0.040150645  | 7.395012968 | 0.263336439  | 0.797970651 | 0.797970651 | -5.598469072 |
| 1439344_at   | -0.027974466 | 6.620499643 | -0.263243602 | 0.79804008  | 0.79804008  | -5.598492519 |
| 1446818_at   | -0.017497518 | 6.587171028 | -0.263207319 | 0.798067215 | 0.798067215 | -5.598501681 |
| 1458120_at   | -0.027640753 | 3.266102647 | -0.263188171 | 0.798081536 | 0.798081536 | -5.598506515 |
| 1415825_s_at | 0.022309784  | 9.28954657  | 0.263065645  | 0.798173174 | 0.798173174 | -5.598537442 |
| 1454078_a_at | -0.021404383 | 5.954688248 | -0.262970691 | 0.798244192 | 0.798244192 | -5.598561399 |
| 1429156_at   | -0.019165112 | 7.003831623 | -0.262886442 | 0.798307205 | 0.798307205 | -5.598582648 |
| 1433455_at   | -0.024523174 | 7.911543933 | -0.262857462 | 0.798328881 | 0.798328881 | -5.598589956 |
| 1458490_at   | 0.016835748  | 4.300788302 | 0.262831134  | 0.798348574 | 0.798348574 | -5.598596594 |
| 1449692_at   | -0.027818767 | 4.982255548 | -0.262782428 | 0.798385004 | 0.798385004 | -5.598608873 |
| 1431801_at   | 0.018957129  | 3.566624412 | 0.262764952  | 0.798398076 | 0.798398076 | -5.598613279 |
| 1432191_at   | -0.016133724 | 4.660492096 | -0.262764711 | 0.798398256 | 0.798398256 | -5.598613339 |
| 1459823_at   | 0.02694572   | 7.526876703 | 0.262761667  | 0.798400533 | 0.798400533 | -5.598614107 |
| 1421566_at   | -0.016596572 | 3.421217319 | -0.262743966 | 0.798413773 | 0.798413773 | -5.598618568 |
| 1445679_at   | 0.027377904  | 4.167597498 | 0.26266006   | 0.798476534 | 0.798476534 | -5.598639713 |
| 1455172_at   | 0.020853186  | 5.918505098 | 0.262640616  | 0.798491078 | 0.798491078 | -5.598644612 |
| 1448302_at   | 0.016910289  | 8.897071486 | 0.262575798  | 0.798539563 | 0.798539563 | -5.598660941 |
| 1458082_at   | -0.020664957 | 6.428337457 | -0.262566697 | 0.798546371 | 0.798546371 | -5.598663234 |
| 1437412_at   | -0.016925446 | 4.332555683 | -0.262550122 | 0.798558769 | 0.798558769 | -5.598667408 |
| 1423265_at   | -0.028863349 | 9.357274338 | -0.26253655  | 0.798568921 | 0.798568921 | -5.598670827 |

|              |              |             |              |             |             |              |
|--------------|--------------|-------------|--------------|-------------|-------------|--------------|
| 1436131_at   | 0.021003539  | 4.980015194 | 0.26252561   | 0.798577105 | 0.798577105 | -5.598673582 |
| 1454590_at   | 0.023261837  | 4.12344288  | 0.262522506  | 0.798579427 | 0.798579427 | -5.598674363 |
| 1430862_at   | 0.025681705  | 4.578943055 | 0.262504618  | 0.798592808 | 0.798592808 | -5.598678868 |
| 1445176_at   | 0.030800898  | 3.70246052  | 0.262496392  | 0.798598961 | 0.798598961 | -5.59868094  |
| 1459239_at   | -0.021994705 | 3.187578048 | -0.262444271 | 0.798637949 | 0.798637949 | -5.598694063 |
| 1456526_at   | 0.025838717  | 6.496860838 | 0.262402689  | 0.798669055 | 0.798669055 | -5.598704531 |
| 1457663_at   | 0.024170387  | 3.047870884 | 0.26238606   | 0.798681494 | 0.798681494 | -5.598708717 |
| 1449715_at   | -0.016941474 | 3.067943719 | -0.262377955 | 0.798687557 | 0.798687557 | -5.598710757 |
| 1435706_at   | -0.021132134 | 6.337441561 | -0.262357165 | 0.79870311  | 0.79870311  | -5.598715989 |
| 1448469_at   | -0.020332507 | 9.224125123 | -0.26232383  | 0.798728047 | 0.798728047 | -5.598724379 |
| 1454981_at   | -0.018434589 | 9.475615689 | -0.262286349 | 0.798756085 | 0.798756085 | -5.59873381  |
| 1436231_at   | -0.027779441 | 3.609276483 | -0.262282692 | 0.798758821 | 0.798758821 | -5.59873473  |
| 1430947_at   | 0.023827903  | 4.678861412 | 0.262264438  | 0.798772477 | 0.798772477 | -5.598739323 |
| 1445563_at   | -0.033236155 | 3.110897332 | -0.262211556 | 0.798812038 | 0.798812038 | -5.598752627 |
| 1419007_at   | -0.026381187 | 4.416041176 | -0.262207724 | 0.798814904 | 0.798814904 | -5.59875359  |
| 1416131_s_at | -0.029073968 | 8.877150756 | -0.26220172  | 0.798819396 | 0.798819396 | -5.598755101 |
| 1458807_at   | -0.025528901 | 6.097567696 | -0.262201119 | 0.798819846 | 0.798819846 | -5.598755252 |
| 1450863_a_at | 0.025480965  | 6.328674924 | 0.262123127  | 0.798878192 | 0.798878192 | -5.598774867 |
| 1422467_at   | -0.024561777 | 9.083755008 | -0.262119835 | 0.798880655 | 0.798880655 | -5.598775694 |
| 1416658_at   | -0.033025275 | 10.397896   | -0.262041798 | 0.798939036 | 0.798939036 | -5.598795315 |
| 1433999_at   | 0.028391712  | 8.758349365 | 0.262041128  | 0.798939538 | 0.798939538 | -5.598795483 |
| 1421416_at   | -0.016399675 | 5.053472877 | -0.262027362 | 0.798949836 | 0.798949836 | -5.598798943 |
| 1427380_at   | -0.019106139 | 3.390601841 | -0.261905133 | 0.799041282 | 0.799041282 | -5.598829661 |
| 1448052_at   | 0.022277086  | 5.321994676 | 0.261900642  | 0.799044643 | 0.799044643 | -5.59883079  |
| 1416904_at   | 0.020262571  | 10.44480626 | 0.261790618  | 0.799126959 | 0.799126959 | -5.598858427 |
| 1435100_at   | -0.027257586 | 4.362824931 | -0.261768918 | 0.799143195 | 0.799143195 | -5.598863877 |
| 1429271_at   | 0.038486796  | 5.793201214 | 0.261766304  | 0.799145151 | 0.799145151 | -5.598864533 |
| 1446719_at   | 0.025187809  | 4.974216639 | 0.261671601  | 0.799216009 | 0.799216009 | -5.598888312 |
| 1424182_at   | 0.016309675  | 8.297142881 | 0.261599081  | 0.79927027  | 0.79927027  | -5.598906514 |
| 1430769_s_at | -0.021651475 | 8.730344031 | -0.261566255 | 0.799294831 | 0.799294831 | -5.598914752 |
| 1451150_at   | -0.018508826 | 7.964273408 | -0.26150671  | 0.799339385 | 0.799339385 | -5.598929692 |
| 1460654_at   | -0.027942074 | 7.105794384 | -0.261453578 | 0.799379142 | 0.799379142 | -5.59894302  |
| 1434849_at   | -0.015805553 | 8.344362126 | -0.261445831 | 0.799384939 | 0.799384939 | -5.598944964 |
| 1427050_at   | 0.021827985  | 8.360533098 | 0.261375795  | 0.799437345 | 0.799437345 | -5.598962528 |
| 1437167_at   | -0.024128047 | 4.440199502 | -0.261364204 | 0.799446017 | 0.799446017 | -5.598965434 |
| 1459093_at   | -0.02647422  | 3.805778707 | -0.261356852 | 0.799451519 | 0.799451519 | -5.598967278 |
| 1445605_s_at | 0.035761158  | 4.083071745 | 0.261329528  | 0.799471965 | 0.799471965 | -5.598974128 |
| 1455037_at   | -0.045268349 | 7.18280055  | -0.261327222 | 0.799473691 | 0.799473691 | -5.598974706 |
| 1425328_at   | 0.017229847  | 7.639013906 | 0.261324568  | 0.799475677 | 0.799475677 | -5.598975372 |
| 1443385_at   | 0.02196323   | 3.768664542 | 0.261312384  | 0.799484794 | 0.799484794 | -5.598978426 |
| 1443708_at   | 0.020821596  | 5.692346483 | 0.261275784  | 0.799512181 | 0.799512181 | -5.598987601 |
| 1435873_a_at | 0.016782901  | 13.75415962 | 0.261268654  | 0.799517517 | 0.799517517 | -5.598989388 |
| 1419710_at   | 0.022613076  | 7.61941048  | 0.261268513  | 0.799517622 | 0.799517622 | -5.598989424 |
| 1416690_at   | 0.022261115  | 8.896588513 | 0.261241931  | 0.799537514 | 0.799537514 | -5.598996086 |
| 1441052_at   | 0.03012245   | 7.001797205 | 0.261216965  | 0.799556196 | 0.799556196 | -5.599002343 |
| 1448595_a_at | 0.027690157  | 10.74306765 | 0.261135614  | 0.799617073 | 0.799617073 | -5.599022727 |
| 1458629_at   | 0.032344535  | 5.420807025 | 0.261125813  | 0.799624407 | 0.799624407 | -5.599025182 |
| 1457092_at   | 0.020221593  | 4.240166438 | 0.261112284  | 0.799634531 | 0.799634531 | -5.599028572 |
| 1445905_at   | -0.016775685 | 3.764007235 | -0.261102448 | 0.799641892 | 0.799641892 | -5.599031036 |
| 1415963_at   | -0.030619699 | 10.24719282 | -0.261081953 | 0.799657229 | 0.799657229 | -5.599036169 |
| 1437529_at   | -0.028786206 | 3.075026908 | -0.26108138  | 0.799657658 | 0.799657658 | -5.599036313 |
| 1444970_at   | -0.017020472 | 3.573154776 | -0.261058339 | 0.799674901 | 0.799674901 | -5.599042084 |
| 1438005_at   | 0.018779925  | 7.844979075 | 0.261000583  | 0.799718123 | 0.799718123 | -5.599056548 |

|              |              |             |              |             |             |              |
|--------------|--------------|-------------|--------------|-------------|-------------|--------------|
| 1450598_at   | -0.026710364 | 3.109695478 | -0.260998725 | 0.799719513 | 0.799719513 | -5.599057013 |
| 1439678_at   | -0.023482844 | 7.371683345 | -0.260995108 | 0.799722219 | 0.799722219 | -5.599057918 |
| 1434314_s_at | 0.023772215  | 8.817347735 | 0.260975308  | 0.799737038 | 0.799737038 | -5.599062876 |
| 1429947_a_at | 0.020471679  | 4.513704052 | 0.260962062  | 0.79974695  | 0.79974695  | -5.599066193 |
| 1444696_at   | 0.028569417  | 6.007607571 | 0.260912407  | 0.799784111 | 0.799784111 | -5.599078623 |
| 1460211_a_at | 0.027848748  | 10.9029903  | 0.260874992  | 0.799812111 | 0.799812111 | -5.599087988 |
| 1456087_at   | -0.01762684  | 10.58845869 | -0.26086913  | 0.799816499 | 0.799816499 | -5.599089455 |
| 1436165_at   | 0.021981992  | 9.056831804 | 0.260866331  | 0.799818593 | 0.799818593 | -5.599090156 |
| 1449054_a_at | 0.031507546  | 8.511515938 | 0.260859927  | 0.799823386 | 0.799823386 | -5.599091759 |
| 1424862_s_at | 0.024970689  | 7.798267255 | 0.26085309   | 0.799828502 | 0.799828502 | -5.59909347  |
| 1455000_at   | 0.022648366  | 5.055487042 | 0.260849345  | 0.799831305 | 0.799831305 | -5.599094407 |
| 1422730_at   | -0.034204186 | 8.709836304 | -0.260832843 | 0.799843655 | 0.799843655 | -5.599098536 |
| 1457182_at   | 0.032146398  | 3.867603015 | 0.260812402  | 0.799858953 | 0.799858953 | -5.599103652 |
| 1446740_at   | -0.025711921 | 3.171778389 | -0.26079915  | 0.799868871 | 0.799868871 | -5.599106967 |
| 1449419_at   | -0.019510737 | 6.76266111  | -0.260786964 | 0.799877991 | 0.799877991 | -5.599110016 |
| 1430594_at   | 0.030926209  | 4.22592412  | 0.260769821  | 0.799890821 | 0.799890821 | -5.599114306 |
| 1435913_at   | 0.02083298   | 8.421713431 | 0.260716077  | 0.799931044 | 0.799931044 | -5.59912775  |
| 1419829_a_at | -0.035155351 | 7.869786855 | -0.260711189 | 0.799934702 | 0.799934702 | -5.599128973 |
| 1453454_at   | 0.025027889  | 4.768602589 | 0.260705059  | 0.79993929  | 0.79993929  | -5.599130506 |
| 1436619_at   | 0.02668886   | 4.540913882 | 0.26066697   | 0.799967797 | 0.799967797 | -5.599140032 |
| 1460401_at   | -0.018691903 | 9.904749627 | -0.260616546 | 0.800005536 | 0.800005536 | -5.599152641 |
| 1421165_at   | -0.022372826 | 3.266807702 | -0.260601937 | 0.80001647  | 0.80001647  | -5.599156294 |
| 1427009_at   | -0.033514367 | 7.745505117 | -0.260582484 | 0.800031029 | 0.800031029 | -5.599161158 |
| 1439871_at   | -0.026467243 | 6.049894237 | -0.260500283 | 0.800092553 | 0.800092553 | -5.599181705 |
| 1459843_s_at | 0.028272483  | 9.744731613 | 0.260464736  | 0.800119159 | 0.800119159 | -5.599190589 |
| 1452650_at   | 0.036573847  | 5.826369794 | 0.260437432  | 0.800139596 | 0.800139596 | -5.599197412 |
| 1428857_at   | 0.037144077  | 8.054783869 | 0.260420549  | 0.800152232 | 0.800152232 | -5.59920163  |
| 1421975_a_at | -0.028917118 | 5.519769973 | -0.260417376 | 0.800154607 | 0.800154607 | -5.599202423 |
| 1456791_at   | -0.024341889 | 7.115059336 | -0.260406827 | 0.800162503 | 0.800162503 | -5.599205058 |
| 1431573_at   | -0.021473518 | 3.949589863 | -0.260405479 | 0.800163512 | 0.800163512 | -5.599205395 |
| 1448267_at   | 0.018042541  | 6.956974014 | 0.260397906  | 0.80016918  | 0.80016918  | -5.599207287 |
| 1452774_at   | 0.023055064  | 11.36497067 | 0.260394068  | 0.800172053 | 0.800172053 | -5.599208246 |
| 1449622_s_at | -0.016385248 | 10.34119497 | -0.260393755 | 0.800172287 | 0.800172287 | -5.599208324 |
| 1423018_at   | -0.024667087 | 4.549664815 | -0.260365574 | 0.80019338  | 0.80019338  | -5.599215364 |
| 1450899_at   | 0.020935713  | 8.623971377 | 0.260344962  | 0.800208808 | 0.800208808 | -5.599220513 |
| 1443280_at   | 0.021928713  | 3.335953543 | 0.260308207  | 0.800236319 | 0.800236319 | -5.599229693 |
| 1421869_at   | 0.027157649  | 6.450599139 | 0.260269326  | 0.800265422 | 0.800265422 | -5.599239403 |
| 1419423_at   | -0.033954952 | 4.91904155  | -0.26021712  | 0.8003045   | 0.8003045   | -5.599252438 |
| 1439679_at   | -0.017381655 | 6.535889167 | -0.260205949 | 0.800312862 | 0.800312862 | -5.599255227 |
| 1445900_at   | 0.033675878  | 5.630883481 | 0.260122933  | 0.800375002 | 0.800375002 | -5.599275949 |
| 1460489_at   | -0.017959991 | 3.410201618 | -0.260064135 | 0.800419016 | 0.800419016 | -5.599290621 |
| 1453183_at   | -0.021570212 | 8.167164204 | -0.260061191 | 0.80042122  | 0.80042122  | -5.599291356 |
| 1445872_at   | 0.020782496  | 3.508520721 | 0.25999229   | 0.800472796 | 0.800472796 | -5.599308545 |
| 1452062_at   | 0.016389214  | 8.699599225 | 0.259922851  | 0.800524777 | 0.800524777 | -5.599325865 |
| 1423986_a_at | 0.020374212  | 9.095463762 | 0.25988848   | 0.800550507 | 0.800550507 | -5.599334436 |
| 1431707_a_at | 0.02295432   | 7.297093538 | 0.259848654  | 0.800580321 | 0.800580321 | -5.599344366 |
| 1437839_x_at | 0.015779247  | 7.814391262 | 0.259831351  | 0.800593274 | 0.800593274 | -5.599348679 |
| 1418064_at   | -0.015790861 | 7.431468105 | -0.259809406 | 0.800609703 | 0.800609703 | -5.59935415  |
| 1442325_at   | -0.025247201 | 7.191511915 | -0.259780653 | 0.800631227 | 0.800631227 | -5.599361317 |
| 1426019_at   | -0.02278312  | 3.563817657 | -0.259768458 | 0.800640357 | 0.800640357 | -5.599364356 |
| 1421557_x_at | -0.019719066 | 8.915162012 | -0.259739779 | 0.800661827 | 0.800661827 | -5.599371504 |
| 1440134_at   | -0.020560987 | 3.913199358 | -0.259731865 | 0.800667751 | 0.800667751 | -5.599373476 |
| 1424619_at   | -0.020932825 | 10.0225762  | -0.259683539 | 0.80070393  | 0.80070393  | -5.599385518 |

|              |              |             |              |             |             |              |
|--------------|--------------|-------------|--------------|-------------|-------------|--------------|
| 1418168_at   | -0.017603947 | 9.426539191 | -0.25968066  | 0.800706086 | 0.800706086 | -5.599386236 |
| 1440546_at   | 0.018560686  | 3.909952956 | 0.259675967  | 0.800709599 | 0.800709599 | -5.599387405 |
| 1432123_at   | -0.023108997 | 3.556712691 | -0.259626337 | 0.800746754 | 0.800746754 | -5.599399769 |
| 1437969_s_at | -0.018414448 | 7.857001683 | -0.259544001 | 0.800808396 | 0.800808396 | -5.599420276 |
| 1443363_at   | -0.025188357 | 4.49437024  | -0.259542646 | 0.80080941  | 0.80080941  | -5.599420613 |
| 1430189_at   | -0.017253048 | 6.055673194 | -0.259514902 | 0.800830181 | 0.800830181 | -5.599427522 |
| 1437418_at   | 0.053017845  | 6.147724038 | 0.259496682  | 0.800843822 | 0.800843822 | -5.599432059 |
| 1421698_a_at | -0.059470961 | 4.150709146 | -0.259449621 | 0.800879056 | 0.800879056 | -5.599443775 |
| 1450841_at   | -0.019848274 | 9.596451293 | -0.259448785 | 0.800879683 | 0.800879683 | -5.599443983 |
| 1443565_at   | -0.016944268 | 3.337312156 | -0.259442574 | 0.800884332 | 0.800884332 | -5.599445529 |
| 1431695_at   | -0.024503    | 4.595017561 | -0.259418263 | 0.800902534 | 0.800902534 | -5.59945158  |
| 1453649_at   | -0.01915738  | 5.080132299 | -0.259323051 | 0.80097382  | 0.80097382  | -5.599475275 |
| 1440290_at   | 0.017115388  | 5.167110495 | 0.259284189  | 0.801002917 | 0.801002917 | -5.599484944 |
| 1450451_at   | 0.024365027  | 5.047724789 | 0.259241669  | 0.801034753 | 0.801034753 | -5.599495521 |
| 1429830_a_at | -0.023427656 | 7.267428042 | -0.259220102 | 0.801050901 | 0.801050901 | -5.599500886 |
| 1419289_a_at | -0.039473837 | 5.510109581 | -0.259190897 | 0.801072768 | 0.801072768 | -5.599508149 |
| 1444394_at   | 0.016229029  | 5.223463169 | 0.259158921  | 0.80109671  | 0.80109671  | -5.599516101 |
| 1425460_at   | -0.025871394 | 8.023580653 | -0.259105112 | 0.801137    | 0.801137    | -5.59952948  |
| 1446790_at   | -0.016260716 | 3.475225058 | -0.259075034 | 0.801159521 | 0.801159521 | -5.599536957 |
| 1423930_at   | 0.022465149  | 8.357883327 | 0.2590502    | 0.801178116 | 0.801178116 | -5.59954313  |
| 1451865_at   | -0.023206831 | 4.498660901 | -0.25904389  | 0.801182841 | 0.801182841 | -5.599544698 |
| 1424880_at   | 0.024787651  | 6.784000521 | 0.258993122  | 0.801220855 | 0.801220855 | -5.599557316 |
| 1418327_at   | -0.025397915 | 9.41575314  | -0.258947799 | 0.801254793 | 0.801254793 | -5.599568578 |
| 1449840_at   | -0.026104535 | 5.85450502  | -0.258940505 | 0.801260254 | 0.801260254 | -5.59957039  |
| 1454624_at   | 0.029651127  | 7.706113546 | 0.258888556  | 0.801299154 | 0.801299154 | -5.599583296 |
| 1424254_at   | 0.02546398   | 9.039409441 | 0.258880345  | 0.801305302 | 0.801305302 | -5.599585336 |
| 1424191_a_at | 0.017456838  | 8.985303972 | 0.258860264  | 0.80132034  | 0.80132034  | -5.599590324 |
| 1429069_at   | -0.019130783 | 7.210315321 | -0.258826024 | 0.801345979 | 0.801345979 | -5.599598828 |
| 1453070_at   | 0.048711391  | 7.519459781 | 0.258803531  | 0.801362823 | 0.801362823 | -5.599604414 |
| 1458478_at   | -0.023892491 | 3.774357802 | -0.258775702 | 0.801383662 | 0.801383662 | -5.599611324 |
| 1456695_x_at | 0.016888233  | 12.21242113 | 0.258698442  | 0.801441517 | 0.801441517 | -5.599630505 |
| 1431630_a_at | -0.022951707 | 7.953378359 | -0.258638258 | 0.801486587 | 0.801486587 | -5.599645442 |
| 1427761_at   | -0.018694607 | 3.899889182 | -0.258585929 | 0.801525774 | 0.801525774 | -5.599658428 |
| 1447453_x_at | 0.017942155  | 3.258408798 | 0.258560996  | 0.801544446 | 0.801544446 | -5.599664614 |
| 1441815_at   | -0.016352692 | 3.716687654 | -0.258550995 | 0.801551935 | 0.801551935 | -5.599667095 |
| 1424262_at   | 0.023186308  | 8.35317361  | 0.258512716  | 0.801580602 | 0.801580602 | -5.599676591 |
| 1445334_at   | -0.02753304  | 4.622503159 | -0.258510362 | 0.801582365 | 0.801582365 | -5.599677175 |
| 1422560_at   | 0.023202985  | 7.76916818  | 0.258496166  | 0.801592996 | 0.801592996 | -5.599680696 |
| 1448429_at   | -0.01711752  | 8.674186178 | -0.25848314  | 0.801602751 | 0.801602751 | -5.599683927 |
| 1416989_at   | 0.017371541  | 8.951778471 | 0.258481136  | 0.801604252 | 0.801604252 | -5.599684424 |
| 1457846_at   | 0.018369804  | 3.899491251 | 0.258462827  | 0.801617964 | 0.801617964 | -5.599688965 |
| 1438487_s_at | 0.037672224  | 7.602440392 | 0.258454367  | 0.801624299 | 0.801624299 | -5.599691063 |
| 1434571_at   | -0.021883733 | 8.270816912 | -0.25842456  | 0.801646622 | 0.801646622 | -5.599698454 |
| 1429579_at   | -0.018200823 | 5.836375311 | -0.25837997  | 0.801680016 | 0.801680016 | -5.59970951  |
| 1428527_at   | -0.026935523 | 8.393193417 | -0.258322071 | 0.801723378 | 0.801723378 | -5.599723864 |
| 1455098_a_at | 0.019504055  | 4.025243736 | 0.258298866  | 0.801740757 | 0.801740757 | -5.599729615 |
| 1415767_at   | 0.02023081   | 10.28901308 | 0.25827919   | 0.801755493 | 0.801755493 | -5.599734492 |
| 1428406_s_at | 0.022575288  | 8.894932447 | 0.258270506  | 0.801761997 | 0.801761997 | -5.599736644 |
| 1459254_at   | 0.020942443  | 6.013966556 | 0.258268557  | 0.801763457 | 0.801763457 | -5.599737127 |
| 1423886_at   | -0.038057974 | 7.442699587 | -0.258224459 | 0.801796484 | 0.801796484 | -5.599748054 |
| 1443504_at   | 0.036939776  | 5.756143014 | 0.25819844   | 0.801815971 | 0.801815971 | -5.599754501 |
| 1441009_at   | -0.020455241 | 3.654749604 | -0.258191693 | 0.801821024 | 0.801821024 | -5.599756173 |
| 1448555_at   | 0.024323362  | 8.21318965  | 0.258157658  | 0.801846515 | 0.801846515 | -5.599764604 |

|              |              |             |              |             |             |              |
|--------------|--------------|-------------|--------------|-------------|-------------|--------------|
| 1458511_at   | 0.027715974  | 5.50984754  | 0.258141731  | 0.801858444 | 0.801858444 | -5.59976855  |
| 1435326_at   | 0.0171278    | 8.948773325 | 0.258127805  | 0.801868874 | 0.801868874 | -5.599771999 |
| 1430878_at   | 0.017969794  | 3.592293445 | 0.258122501  | 0.801872847 | 0.801872847 | -5.599773313 |
| 1417238_at   | 0.017933178  | 9.903596809 | 0.258087998  | 0.801898688 | 0.801898688 | -5.599781858 |
| 1455795_at   | 0.03687039   | 7.92901223  | 0.258062866  | 0.801917512 | 0.801917512 | -5.599788082 |
| 1433078_at   | -0.024254963 | 3.673904008 | -0.258056692 | 0.801922136 | 0.801922136 | -5.59978961  |
| 1451303_at   | 0.025470927  | 7.822268357 | 0.258053554  | 0.801924487 | 0.801924487 | -5.599790387 |
| 1445945_at   | -0.024245064 | 3.242338001 | -0.257990834 | 0.801971463 | 0.801971463 | -5.599805916 |
| 1434326_x_at | -0.04224122  | 6.31954313  | -0.257973624 | 0.801984354 | 0.801984354 | -5.599810177 |
| 1446912_at   | -0.018939988 | 3.176345237 | -0.257971665 | 0.801985821 | 0.801985821 | -5.599810662 |
| 1429902_at   | 0.019751081  | 7.885743721 | 0.257961636  | 0.801993333 | 0.801993333 | -5.599813144 |
| 1417263_at   | 0.026036368  | 4.015017534 | 0.257954479  | 0.801998694 | 0.801998694 | -5.599814916 |
| 1428336_at   | 0.017608963  | 8.343899272 | 0.257915249  | 0.802028077 | 0.802028077 | -5.599824625 |
| 1418775_at   | 0.021844052  | 8.047217982 | 0.257795796  | 0.802117551 | 0.802117551 | -5.599854182 |
| 1448116_at   | 0.016878374  | 11.05757249 | 0.257694632  | 0.802193328 | 0.802193328 | -5.599879202 |
| 1429976_at   | -0.018031952 | 3.333031625 | -0.257679355 | 0.802204772 | 0.802204772 | -5.59988298  |
| 1459571_at   | 0.027714907  | 7.032683937 | 0.257668716  | 0.802212741 | 0.802212741 | -5.599885611 |
| 1450429_at   | 0.022808494  | 11.66467647 | 0.257664512  | 0.80221589  | 0.80221589  | -5.59988665  |
| 1416337_at   | 0.025765732  | 9.54882036  | 0.257612919  | 0.802254537 | 0.802254537 | -5.599899405 |
| 1442161_at   | 0.019822641  | 4.035678761 | 0.257606712  | 0.802259187 | 0.802259187 | -5.59990094  |
| 1426624_a_at | -0.018086618 | 8.580935766 | -0.257583687 | 0.802276435 | 0.802276435 | -5.599906631 |
| 1435609_at   | -0.019293103 | 7.398125821 | -0.257569407 | 0.802287132 | 0.802287132 | -5.599910161 |
| 1437725_x_at | -0.033298754 | 6.508745244 | -0.257527565 | 0.802318475 | 0.802318475 | -5.599920502 |
| 1447433_at   | 0.020625954  | 4.529819663 | 0.257518994  | 0.802324896 | 0.802324896 | -5.59992262  |
| 1427532_at   | 0.019556118  | 3.2122173   | 0.257503769  | 0.802336301 | 0.802336301 | -5.599926382 |
| 1436749_at   | -0.023782138 | 6.280484862 | -0.257468704 | 0.802362568 | 0.802362568 | -5.599935046 |
| 1423072_at   | 0.070049844  | 9.328669609 | 0.257436631  | 0.802386595 | 0.802386595 | -5.599942969 |
| 1443592_at   | -0.035620461 | 5.984846787 | -0.25741193  | 0.802405099 | 0.802405099 | -5.599949071 |
| 1441759_at   | -0.026807859 | 4.274106839 | -0.257359585 | 0.802444312 | 0.802444312 | -5.599962    |
| 1439003_s_at | 0.024896027  | 3.589783328 | 0.257344793  | 0.802455393 | 0.802455393 | -5.599965653 |
| 1455938_x_at | 0.069789436  | 8.185411792 | 0.25733382   | 0.802463614 | 0.802463614 | -5.599968363 |
| 1449825_at   | 0.029458746  | 3.948541033 | 0.257332303  | 0.80246475  | 0.80246475  | -5.599968737 |
| 1458545_at   | 0.021928866  | 4.957052364 | 0.25732872   | 0.802467434 | 0.802467434 | -5.599969622 |
| 1419107_at   | -0.025478521 | 6.632969379 | -0.257284556 | 0.802500519 | 0.802500519 | -5.599980526 |
| 1422031_a_at | 0.023258191  | 9.491274539 | 0.257260375  | 0.802518635 | 0.802518635 | -5.599986496 |
| 1428842_a_at | -0.01570338  | 11.38370047 | -0.257203302 | 0.802561392 | 0.802561392 | -5.600000585 |
| 1426270_at   | 0.024334049  | 8.453074891 | 0.257200513  | 0.802563481 | 0.802563481 | -5.600001273 |
| 1427117_at   | -0.02114815  | 8.02796313  | -0.257141443 | 0.802607735 | 0.802607735 | -5.60001585  |
| 1420597_a_at | -0.021994826 | 5.052067548 | -0.257129802 | 0.802616457 | 0.802616457 | -5.600018723 |
| 1437109_s_at | 0.020313047  | 10.23008404 | 0.257113862  | 0.802628399 | 0.802628399 | -5.600022656 |
| 1438716_at   | -0.019943532 | 3.724067009 | -0.257103007 | 0.802636531 | 0.802636531 | -5.600025334 |
| 1448410_at   | 0.023336226  | 8.810091527 | 0.257066143  | 0.802664149 | 0.802664149 | -5.600034429 |
| 1422019_at   | 0.020590542  | 3.190720154 | 0.257061987  | 0.802667263 | 0.802667263 | -5.600035454 |
| 1420119_s_at | 0.031670292  | 4.773984248 | 0.257060625  | 0.802668283 | 0.802668283 | -5.60003579  |
| 1425143_a_at | 0.015199792  | 10.09880827 | 0.25705165   | 0.802675007 | 0.802675007 | -5.600038004 |
| 1445489_at   | 0.028510338  | 5.672373672 | 0.25702424   | 0.802695543 | 0.802695543 | -5.600044765 |
| 1455054_a_at | 0.033480458  | 8.14893204  | 0.257002646  | 0.802711721 | 0.802711721 | -5.60005009  |
| 1443184_at   | 0.017313918  | 5.135441788 | 0.256979932  | 0.802728738 | 0.802728738 | -5.600055692 |
| 1427401_at   | -0.035074398 | 4.401891778 | -0.256956385 | 0.802746381 | 0.802746381 | -5.600061499 |
| 1419975_at   | -0.04942626  | 4.770570522 | -0.256921311 | 0.802772659 | 0.802772659 | -5.600070147 |
| 1426401_at   | -0.018019199 | 9.937939146 | -0.256853233 | 0.802823665 | 0.802823665 | -5.600086929 |
| 1454049_at   | -0.021554905 | 4.056125217 | -0.256782907 | 0.802876357 | 0.802876357 | -5.600104261 |
| 1451044_at   | 0.030428062  | 7.185680328 | 0.256712487  | 0.80292912  | 0.80292912  | -5.600121611 |

|              |              |             |              |             |             |              |
|--------------|--------------|-------------|--------------|-------------|-------------|--------------|
| 1420133_at   | -0.025680378 | 4.452279929 | -0.256703987 | 0.802935489 | 0.802935489 | -5.600123706 |
| 1441179_at   | -0.022936511 | 4.329767432 | -0.25669879  | 0.802939383 | 0.802939383 | -5.600124986 |
| 1434886_at   | -0.021726926 | 7.703162644 | -0.256636461 | 0.802986085 | 0.802986085 | -5.600140338 |
| 1420921_at   | 0.018566491  | 4.710944238 | 0.256634406  | 0.802987625 | 0.802987625 | -5.600140844 |
| 1440068_at   | -0.074035934 | 4.600107229 | -0.256616476 | 0.80300106  | 0.80300106  | -5.60014526  |
| 1421725_at   | 0.029030371  | 4.095081383 | 0.256605307  | 0.803009429 | 0.803009429 | -5.60014801  |
| 1432358_at   | 0.018960828  | 4.677891632 | 0.25658461   | 0.803024937 | 0.803024937 | -5.600153107 |
| 1436891_at   | -0.021011964 | 4.566579494 | -0.256569013 | 0.803036623 | 0.803036623 | -5.600156947 |
| 1419239_at   | -0.030393128 | 3.838701606 | -0.25656253  | 0.803041482 | 0.803041482 | -5.600158543 |
| 1416679_at   | -0.015505675 | 10.29306858 | -0.256552235 | 0.803049195 | 0.803049195 | -5.600161078 |
| 1419973_at   | -0.024733618 | 3.412944611 | -0.256520611 | 0.803072892 | 0.803072892 | -5.600168863 |
| 1450697_at   | -0.018546564 | 7.80971008  | -0.256506801 | 0.803083239 | 0.803083239 | -5.600172263 |
| 1437334_x_at | 0.018023305  | 7.969401704 | 0.256478791  | 0.803104228 | 0.803104228 | -5.600179157 |
| 1438167_x_at | -0.025523217 | 8.240475329 | -0.256425965 | 0.803143812 | 0.803143812 | -5.600192158 |
| 1433325_at   | -0.032818649 | 4.002054163 | -0.256330886 | 0.803215058 | 0.803215058 | -5.600215551 |
| 1427513_at   | 0.025680522  | 4.459411662 | 0.256297914  | 0.803239766 | 0.803239766 | -5.600223661 |
| 1441433_at   | 0.02440652   | 5.762887127 | 0.256289087  | 0.803246381 | 0.803246381 | -5.600225832 |
| 1416552_at   | 0.017074393  | 5.236622985 | 0.256285309  | 0.803249212 | 0.803249212 | -5.600226762 |
| 1423755_at   | -0.01887511  | 9.35234923  | -0.256265501 | 0.803264055 | 0.803264055 | -5.600231633 |
| 1452528_a_at | -0.022727108 | 4.964269148 | -0.25626286  | 0.803266035 | 0.803266035 | -5.600232283 |
| 1452253_at   | -0.025324519 | 3.734622067 | -0.256255696 | 0.803271403 | 0.803271403 | -5.600234044 |
| 1422825_at   | 0.131949883  | 4.747205123 | 0.256246674  | 0.803278163 | 0.803278163 | -5.600236263 |
| 1437730_at   | -0.020062045 | 10.20204276 | -0.256239658 | 0.803283421 | 0.803283421 | -5.600237988 |
| 1449789_x_at | 0.028523859  | 5.385251234 | 0.256177361  | 0.803330106 | 0.803330106 | -5.600253306 |
| 1453487_at   | 0.02527159   | 4.566117326 | 0.256176084  | 0.803331062 | 0.803331062 | -5.60025362  |
| 1456166_at   | -0.022187839 | 5.156720502 | -0.25617497  | 0.803331897 | 0.803331897 | -5.600253894 |
| 1445222_at   | -0.017607645 | 4.358285778 | -0.25616876  | 0.803336551 | 0.803336551 | -5.60025542  |
| 1460003_at   | -0.032811273 | 6.382218323 | -0.256083613 | 0.803400359 | 0.803400359 | -5.600276349 |
| 1424800_at   | -0.018810883 | 11.76169396 | -0.256027487 | 0.803442421 | 0.803442421 | -5.600290141 |
| 1421221_at   | 0.028617271  | 4.024316443 | 0.255953168  | 0.803498118 | 0.803498118 | -5.600308399 |
| 1438899_at   | 0.033063907  | 3.615749593 | 0.255943284  | 0.803505525 | 0.803505525 | -5.600310827 |
| 1435002_at   | -0.017551718 | 9.348112909 | -0.255939458 | 0.803508393 | 0.803508393 | -5.600311767 |
| 1434985_a_at | 0.017115526  | 12.03295466 | 0.255906692  | 0.803532949 | 0.803532949 | -5.600319814 |
| 1450046_at   | -0.031764501 | 3.598859475 | -0.255905668 | 0.803533716 | 0.803533716 | -5.600320066 |
| 1460535_at   | 0.025587868  | 4.718493888 | 0.255903467  | 0.803535365 | 0.803535365 | -5.600320606 |
| 1440468_at   | -0.016881343 | 3.576956697 | -0.255897245 | 0.803540028 | 0.803540028 | -5.600322134 |
| 1428880_at   | 0.01773473   | 9.464155231 | 0.255894521  | 0.80354207  | 0.80354207  | -5.600322803 |
| 1429760_at   | 0.016722531  | 5.940123498 | 0.255894368  | 0.803542184 | 0.803542184 | -5.600322841 |
| 1437571_at   | -0.018206458 | 7.202499238 | -0.255885494 | 0.803548835 | 0.803548835 | -5.60032502  |
| 1426362_at   | -0.023502315 | 5.12911733  | -0.25586918  | 0.803561062 | 0.803561062 | -5.600329026 |
| 1427310_at   | 0.015530711  | 9.990488149 | 0.255813155  | 0.80360305  | 0.80360305  | -5.600342782 |
| 1424964_at   | -0.025676943 | 3.917719304 | -0.255789486 | 0.803620789 | 0.803620789 | -5.600348593 |
| 1454001_at   | -0.026074395 | 4.595666232 | -0.255768549 | 0.803636481 | 0.803636481 | -5.600353732 |
| 1444183_at   | 0.024720985  | 4.746804569 | 0.255669929  | 0.803710395 | 0.803710395 | -5.600377935 |
| 1458867_at   | -0.025994848 | 3.237095717 | -0.25560592  | 0.803758369 | 0.803758369 | -5.600393638 |
| 1451192_a_at | -0.023351508 | 9.012289962 | -0.255590592 | 0.803769857 | 0.803769857 | -5.600397398 |
| 1426553_at   | -0.019623392 | 7.892259198 | -0.255589089 | 0.803770984 | 0.803770984 | -5.600397767 |
| 1434231_x_at | 0.016233117  | 13.60246366 | 0.255586941  | 0.803772594 | 0.803772594 | -5.600398294 |
| 1430677_at   | 0.026949124  | 4.128518812 | 0.255566955  | 0.803787574 | 0.803787574 | -5.600403196 |
| 1420070_a_at | -0.021686196 | 4.495101884 | -0.255562102 | 0.803791211 | 0.803791211 | -5.600404386 |
| 1430745_at   | -0.02056741  | 4.739579018 | -0.255554737 | 0.803796731 | 0.803796731 | -5.600406193 |
| 1458312_at   | -0.020623834 | 3.533596125 | -0.25552857  | 0.803816344 | 0.803816344 | -5.60041261  |
| 1441717_at   | -0.017994189 | 4.628224382 | -0.255523257 | 0.803820326 | 0.803820326 | -5.600413913 |

|              |              |             |              |             |             |              |
|--------------|--------------|-------------|--------------|-------------|-------------|--------------|
| 1445797_at   | 0.038683869  | 3.783449344 | 0.25550376   | 0.80383494  | 0.80383494  | -5.600418694 |
| 1416526_a_at | 0.017961014  | 10.91602776 | 0.25548578   | 0.803848416 | 0.803848416 | -5.600423103 |
| 1422628_at   | -0.016213116 | 9.013239356 | -0.255431418 | 0.803889162 | 0.803889162 | -5.60043643  |
| 1455775_at   | 0.021889881  | 5.746987978 | 0.255349927  | 0.803950244 | 0.803950244 | -5.600456404 |
| 1438661_a_at | 0.019266965  | 5.721868106 | 0.255344688  | 0.803954171 | 0.803954171 | -5.600457688 |
| 1460046_at   | -0.023070814 | 3.631860717 | -0.255307017 | 0.803982408 | 0.803982408 | -5.600466919 |
| 1443918_at   | -0.015195734 | 6.28794411  | -0.255217357 | 0.804049615 | 0.804049615 | -5.600488884 |
| 1425462_at   | 0.019160188  | 9.380880916 | 0.255183589  | 0.804074928 | 0.804074928 | -5.600497155 |
| 1428162_at   | 0.036301056  | 7.031120496 | 0.25518296   | 0.804075399 | 0.804075399 | -5.600497309 |
| 1427764_a_at | -0.028139435 | 9.060020299 | -0.255173255 | 0.804082674 | 0.804082674 | -5.600499686 |
| 1420229_at   | 0.020559354  | 3.277461092 | 0.255173204  | 0.804082712 | 0.804082712 | -5.600499698 |
| 1422767_at   | -0.021108854 | 8.621702418 | -0.255161562 | 0.804091439 | 0.804091439 | -5.600502549 |
| 1429546_at   | -0.032347578 | 3.950453149 | -0.255079873 | 0.804152673 | 0.804152673 | -5.60052255  |
| 1415817_s_at | 0.016596526  | 11.05959486 | 0.255066665  | 0.804162574 | 0.804162574 | -5.600525784 |
| 1451398_at   | 0.018695823  | 8.166378244 | 0.25500716   | 0.804207181 | 0.804207181 | -5.600540349 |
| 1441241_at   | -0.017868164 | 3.126945177 | -0.254960843 | 0.804241902 | 0.804241902 | -5.600551684 |
| 1432648_at   | 0.017522769  | 3.654062216 | 0.254905864  | 0.804283116 | 0.804283116 | -5.600565135 |
| 1438365_x_at | -0.035140297 | 10.93083032 | -0.254858274 | 0.804318793 | 0.804318793 | -5.600576777 |
| 1432856_at   | -0.028655689 | 3.939850347 | -0.25481856  | 0.804348565 | 0.804348565 | -5.60058649  |
| 1450983_at   | 0.018151523  | 9.710669862 | 0.254799174  | 0.804363098 | 0.804363098 | -5.600591231 |
| 1453596_at   | -0.043841516 | 6.404182027 | -0.254737948 | 0.804408998 | 0.804408998 | -5.600606202 |
| 1451531_at   | 0.02075118   | 7.108080623 | 0.254707664  | 0.804431702 | 0.804431702 | -5.600613606 |
| 1447645_x_at | 0.020757265  | 2.99063124  | 0.254617942  | 0.804498967 | 0.804498967 | -5.600635535 |
| 1419632_at   | 0.031676324  | 4.732473166 | 0.254612194  | 0.804503276 | 0.804503276 | -5.60063694  |
| 1415974_at   | -0.024823167 | 9.261832597 | -0.254582365 | 0.804525639 | 0.804525639 | -5.600644228 |
| 1460714_at   | 0.016863423  | 3.233712318 | 0.254533842  | 0.804562019 | 0.804562019 | -5.600656084 |
| 1455589_at   | 0.024495412  | 7.537461656 | 0.254523618  | 0.804569683 | 0.804569683 | -5.600658581 |
| 1420977_at   | -0.017007995 | 8.769781908 | -0.254520021 | 0.80457238  | 0.80457238  | -5.60065946  |
| 1436805_at   | 0.037026531  | 6.498890094 | 0.254507279  | 0.804581933 | 0.804581933 | -5.600662572 |
| 1459275_at   | -0.017942406 | 4.182552368 | -0.254499898 | 0.804587467 | 0.804587467 | -5.600664375 |
| 1455402_at   | 0.019837344  | 8.927020085 | 0.254493556  | 0.804592222 | 0.804592222 | -5.600665924 |
| 1435380_at   | -0.023298728 | 7.764550049 | -0.254492269 | 0.804593187 | 0.804593187 | -5.600666239 |
| 1418263_at   | -0.022504952 | 6.906983969 | -0.254491389 | 0.804593847 | 0.804593847 | -5.600666454 |
| 1432235_at   | -0.019094913 | 4.901594374 | -0.254458946 | 0.804618171 | 0.804618171 | -5.600674378 |
| 1416073_a_at | -0.018408417 | 9.415873896 | -0.254444446 | 0.804629042 | 0.804629042 | -5.600677919 |
| 1420811_a_at | 0.020115336  | 13.32654852 | 0.254438772  | 0.804633296 | 0.804633296 | -5.600679304 |
| 1448867_at   | -0.021836943 | 9.069438715 | -0.254416475 | 0.804650013 | 0.804650013 | -5.600684749 |
| 1437127_at   | -0.028042149 | 8.075586843 | -0.254356379 | 0.804695071 | 0.804695071 | -5.600699422 |
| 1452296_at   | -0.033351373 | 7.99942772  | -0.254322938 | 0.804720144 | 0.804720144 | -5.600707585 |
| 1447735_x_at | -0.033951784 | 4.453427298 | -0.254287882 | 0.804746428 | 0.804746428 | -5.600716141 |
| 1440138_at   | -0.023385447 | 4.553369665 | -0.254247582 | 0.804776645 | 0.804776645 | -5.600725976 |
| 1449356_at   | -0.019439469 | 3.395270702 | -0.254246736 | 0.804777279 | 0.804777279 | -5.600726183 |
| 1420125_at   | 0.031373239  | 3.579102643 | 0.254242179  | 0.804780696 | 0.804780696 | -5.600727295 |
| 1458331_x_at | 0.018799519  | 4.816526896 | 0.254200795  | 0.804811726 | 0.804811726 | -5.600737392 |
| 1454443_at   | -0.018342467 | 3.651995835 | -0.254098362 | 0.804888531 | 0.804888531 | -5.600762379 |
| 1435488_at   | -0.020382339 | 7.72546865  | -0.254090181 | 0.804894665 | 0.804894665 | -5.600764374 |
| 1420307_a_at | 0.016392922  | 8.95171048  | 0.25408873   | 0.804895753 | 0.804895753 | -5.600764728 |
| 1446103_at   | 0.022948303  | 5.468612474 | 0.254080182  | 0.804902163 | 0.804902163 | -5.600766813 |
| 1451899_a_at | -0.028197146 | 10.31944857 | -0.254047536 | 0.804926641 | 0.804926641 | -5.600774773 |
| 1423429_at   | 0.020321192  | 5.074921358 | 0.254023872  | 0.804944385 | 0.804944385 | -5.600780543 |
| 1438116_x_at | 0.025786616  | 7.979586494 | 0.253980795  | 0.804976686 | 0.804976686 | -5.600791045 |
| 1423499_at   | -0.019493901 | 8.444038942 | -0.253967419 | 0.804986717 | 0.804986717 | -5.600794306 |
| 1440875_a_at | -0.024661542 | 4.992300558 | -0.253904914 | 0.805033586 | 0.805033586 | -5.60080954  |



|              |              |             |              |             |             |              |
|--------------|--------------|-------------|--------------|-------------|-------------|--------------|
| 1425803_a_at | -0.020889676 | 8.263360726 | -0.253875322 | 0.805055776 | 0.805055776 | -5.600816751 |
| 1456784_at   | -0.025613324 | 5.339826844 | -0.253870987 | 0.805059027 | 0.805059027 | -5.600817807 |
| 1444084_at   | 0.018446444  | 4.538129801 | 0.253867627  | 0.805061547 | 0.805061547 | -5.600818626 |
| 1447297_at   | -0.016566313 | 5.688429072 | -0.253850284 | 0.805074551 | 0.805074551 | -5.600822852 |
| 1428432_at   | -0.021385899 | 8.233674263 | -0.253837284 | 0.8050843   | 0.8050843   | -5.600826019 |
| 1459409_at   | -0.026875846 | 6.616175024 | -0.253800388 | 0.805111968 | 0.805111968 | -5.600835008 |
| 1445419_at   | -0.025675166 | 4.234900023 | -0.253773014 | 0.805132495 | 0.805132495 | -5.600841676 |
| 1438719_at   | 0.054792873  | 5.409688295 | 0.253745283  | 0.80515329  | 0.80515329  | -5.60084843  |
| 1445335_at   | 0.021895351  | 3.452617109 | 0.253721581  | 0.805171064 | 0.805171064 | -5.600854202 |
| 1457572_at   | 0.02080043   | 3.514853999 | 0.253709735  | 0.805179948 | 0.805179948 | -5.600857087 |
| 1418931_at   | 0.015572356  | 3.859684651 | 0.253660072  | 0.80521719  | 0.80521719  | -5.600869179 |
| 1421454_at   | -0.022316262 | 5.181322853 | -0.253655198 | 0.805220846 | 0.805220846 | -5.600870366 |
| 1451324_s_at | 0.039768054  | 7.410042796 | 0.253652161  | 0.805223123 | 0.805223123 | -5.600871105 |
| 1417651_at   | 0.021420811  | 3.818284844 | 0.253636186  | 0.805235102 | 0.805235102 | -5.600874994 |
| 1437438_x_at | 0.017576551  | 3.298216517 | 0.253618987  | 0.805248001 | 0.805248001 | -5.600879181 |
| 1432468_at   | -0.020281888 | 3.937283539 | -0.253604561 | 0.805258819 | 0.805258819 | -5.600882693 |
| 1459594_at   | -0.026352034 | 3.467211769 | -0.253564295 | 0.805289016 | 0.805289016 | -5.600892494 |
| 1452586_at   | -0.018641793 | 9.863776529 | -0.253543527 | 0.805304591 | 0.805304591 | -5.600897548 |
| 1423321_at   | -0.024350242 | 9.591359843 | -0.253539827 | 0.805307365 | 0.805307365 | -5.600898448 |
| 1460224_at   | 0.018618833  | 10.60149747 | 0.253537766  | 0.805308911 | 0.805308911 | -5.60089895  |
| 1456942_x_at | 0.015991495  | 4.179412468 | 0.253520244  | 0.805322051 | 0.805322051 | -5.600903214 |
| 1421861_at   | -0.032041347 | 8.732025395 | -0.253516181 | 0.805325098 | 0.805325098 | -5.600904202 |
| 1450953_at   | -0.018726855 | 9.217315706 | -0.253489775 | 0.805344901 | 0.805344901 | -5.600910628 |
| 1453228_at   | 0.030237387  | 5.542569646 | 0.253438859  | 0.805383086 | 0.805383086 | -5.600923014 |
| 1449618_s_at | 0.016462586  | 9.543423818 | 0.253431664  | 0.805388482 | 0.805388482 | -5.600924765 |
| 1424993_at   | 0.020727563  | 9.885988122 | 0.253420352  | 0.805396966 | 0.805396966 | -5.600927516 |
| 1450425_a_at | 0.015920611  | 8.06207236  | 0.253338279  | 0.805458518 | 0.805458518 | -5.600947477 |
| 1450726_at   | 0.020437131  | 6.479759588 | 0.253330264  | 0.805464529 | 0.805464529 | -5.600949426 |
| 1453575_at   | 0.017455462  | 3.505120636 | 0.253253821  | 0.805521861 | 0.805521861 | -5.600968011 |
| 1422605_at   | -0.017738556 | 7.267135888 | -0.253183015 | 0.805574966 | 0.805574966 | -5.60098522  |
| 1458187_at   | -0.02521779  | 5.354994556 | -0.253176665 | 0.805579728 | 0.805579728 | -5.600986763 |
| 1451893_s_at | 0.021896458  | 7.030295127 | 0.253175859  | 0.805580333 | 0.805580333 | -5.600986959 |
| 1423516_a_at | 0.018801203  | 8.925047767 | 0.253136284  | 0.805610015 | 0.805610015 | -5.600996575 |
| 1455490_at   | -0.020856558 | 3.812555086 | -0.253115295 | 0.805625757 | 0.805625757 | -5.601001675 |
| 1422262_a_at | 0.038587879  | 6.485510617 | 0.253083759  | 0.80564941  | 0.80564941  | -5.601009336 |
| 1445822_at   | -0.024022242 | 3.51223409  | -0.253074047 | 0.805656694 | 0.805656694 | -5.601011695 |
| 1451137_a_at | 0.015402258  | 8.520792354 | 0.253072696  | 0.805657708 | 0.805657708 | -5.601012024 |
| 1434300_at   | 0.031817592  | 8.377130676 | 0.253069011  | 0.805660472 | 0.805660472 | -5.601012919 |
| 1422498_at   | 0.020739573  | 8.625584135 | 0.253061959  | 0.80566576  | 0.80566576  | -5.601014632 |
| 1443110_at   | -0.028054459 | 5.159421367 | -0.253034602 | 0.80568628  | 0.80568628  | -5.601021276 |
| 1442709_at   | -0.035846166 | 6.992816291 | -0.253014426 | 0.805701413 | 0.805701413 | -5.601026177 |
| 1459976_s_at | 0.021200728  | 11.54288296 | 0.252938053  | 0.805758697 | 0.805758697 | -5.601044722 |
| 1439681_at   | -0.021227392 | 3.245219082 | -0.252929835 | 0.805764861 | 0.805764861 | -5.601046717 |
| 1419915_at   | -0.019272602 | 4.404106337 | -0.252915303 | 0.805775761 | 0.805775761 | -5.601050245 |
| 1443141_at   | -0.019386935 | 4.550311046 | -0.252844758 | 0.805828675 | 0.805828675 | -5.601067368 |
| 1448669_at   | -0.015617831 | 8.574569374 | -0.252830326 | 0.8058395   | 0.8058395   | -5.601070871 |
| 1451281_at   | 0.023309066  | 6.909980644 | 0.252826075  | 0.805842689 | 0.805842689 | -5.601071902 |
| 1457756_at   | -0.022665171 | 6.032064085 | -0.252819327 | 0.80584775  | 0.80584775  | -5.60107354  |
| 1420289_at   | -0.020130071 | 3.602536189 | -0.252815575 | 0.805850564 | 0.805850564 | -5.60107445  |
| 1429415_at   | 0.026917533  | 7.79370886  | 0.252806813  | 0.805857137 | 0.805857137 | -5.601076576 |
| 1430083_at   | -0.021199618 | 5.689641253 | -0.252798213 | 0.805863587 | 0.805863587 | -5.601078663 |
| 1441247_at   | 0.022007516  | 4.823566851 | 0.252789601  | 0.805870048 | 0.805870048 | -5.601080753 |
| 1451087_at   | -0.017608064 | 8.373949159 | -0.252753091 | 0.805897434 | 0.805897434 | -5.601089612 |

|              |              |             |              |             |             |              |
|--------------|--------------|-------------|--------------|-------------|-------------|--------------|
| 1426836_s_at | 0.018717239  | 10.54031806 | 0.252735559  | 0.805910584 | 0.805910584 | -5.601093865 |
| 1447945_at   | 0.022441979  | 5.041610255 | 0.252666061  | 0.805962716 | 0.805962716 | -5.601110722 |
| 1444791_at   | -0.018458986 | 4.222363667 | -0.252595273 | 0.806015816 | 0.806015816 | -5.601127888 |
| 1441048_at   | 0.022603768  | 4.098604789 | 0.2525838    | 0.806024422 | 0.806024422 | -5.60113067  |
| 1425881_at   | 0.055293235  | 5.312072059 | 0.252559994  | 0.80604228  | 0.80604228  | -5.601136441 |
| 1445056_at   | 0.026526821  | 4.162791239 | 0.252546666  | 0.806052278 | 0.806052278 | -5.601139672 |
| 1448102_a_at | 0.025388557  | 10.55278471 | 0.252545052  | 0.806053489 | 0.806053489 | -5.601140064 |
| 1418927_a_at | -0.022216152 | 7.842173801 | -0.252509009 | 0.806080526 | 0.806080526 | -5.6011488   |
| 1440217_at   | 0.019093755  | 4.272730705 | 0.252506105  | 0.806082705 | 0.806082705 | -5.601149504 |
| 1429867_at   | 0.021317261  | 4.341106324 | 0.252500139  | 0.806087181 | 0.806087181 | -5.60115095  |
| 1432904_at   | 0.022866829  | 4.053172583 | 0.252412673  | 0.806152794 | 0.806152794 | -5.601172146 |
| 1458613_at   | -0.021778254 | 6.729974842 | -0.252386061 | 0.806172758 | 0.806172758 | -5.601178593 |
| 1417450_a_at | -0.01576515  | 8.221981975 | -0.252343853 | 0.806204422 | 0.806204422 | -5.601188818 |
| 1445032_at   | 0.018790953  | 4.306220454 | 0.252281764  | 0.806251    | 0.806251    | -5.601203855 |
| 1443922_at   | -0.043079415 | 5.862994619 | -0.252278218 | 0.806253661 | 0.806253661 | -5.601204714 |
| 1425592_at   | 0.02442626   | 6.528843417 | 0.252257855  | 0.806268937 | 0.806268937 | -5.601209645 |
| 1420675_at   | 0.018749638  | 5.737379691 | 0.252256006  | 0.806270324 | 0.806270324 | -5.601210093 |
| 1439259_x_at | -0.01783788  | 9.966770473 | -0.2522465   | 0.806277456 | 0.806277456 | -5.601212395 |
| 1432353_at   | -0.017104171 | 4.49926326  | -0.252228775 | 0.806290753 | 0.806290753 | -5.601216686 |
| 1431605_at   | -0.040823589 | 3.596677857 | -0.252215603 | 0.806300635 | 0.806300635 | -5.601219875 |
| 1433010_at   | -0.017753413 | 6.294233635 | -0.252198547 | 0.806313431 | 0.806313431 | -5.601224005 |
| 1435087_at   | -0.019919682 | 9.566986466 | -0.252086105 | 0.806397788 | 0.806397788 | -5.601251219 |
| 1459818_x_at | 0.015133929  | 9.585817281 | 0.252078362  | 0.806403597 | 0.806403597 | -5.601253093 |
| 1424978_at   | 0.028300514  | 4.208172559 | 0.252068285  | 0.806411158 | 0.806411158 | -5.601255531 |
| 1416933_at   | 0.016973052  | 8.531344427 | 0.252062749  | 0.80641531  | 0.80641531  | -5.601256871 |
| 1456596_at   | 0.037725035  | 7.462374314 | 0.251996017  | 0.806465376 | 0.806465376 | -5.601273015 |
| 1446230_at   | -0.033759594 | 5.424285108 | -0.251988998 | 0.806470643 | 0.806470643 | -5.601274713 |
| 1439080_at   | 0.027325682  | 7.63200274  | 0.251938324  | 0.806508662 | 0.806508662 | -5.601286969 |
| 1459250_at   | -0.023554763 | 3.471725242 | -0.251896476 | 0.806540059 | 0.806540059 | -5.601297089 |
| 1436993_x_at | 0.030603024  | 10.5996489  | 0.251894965  | 0.806541193 | 0.806541193 | -5.601297454 |
| 1428887_at   | 0.032400689  | 6.225199675 | 0.251875044  | 0.806556139 | 0.806556139 | -5.601302271 |
| 1440488_at   | 0.045640364  | 5.275746769 | 0.251864618  | 0.806563962 | 0.806563962 | -5.601304791 |
| 1440329_s_at | 0.022047611  | 6.813060223 | 0.251845929  | 0.806577984 | 0.806577984 | -5.60130931  |
| 1432832_at   | 0.032019187  | 4.033239192 | 0.251845309  | 0.806578449 | 0.806578449 | -5.60130946  |
| 1445559_at   | -0.022126265 | 6.951309823 | -0.251841892 | 0.806581013 | 0.806581013 | -5.601310286 |
| 1433365_at   | -0.021703151 | 3.24036113  | -0.251836182 | 0.806585297 | 0.806585297 | -5.601311666 |
| 1455856_at   | -0.024655646 | 4.523943182 | -0.251770374 | 0.806634673 | 0.806634673 | -5.601327573 |
| 1436659_at   | 0.020939055  | 9.114628315 | 0.251665949  | 0.806713024 | 0.806713024 | -5.601352805 |
| 1443535_at   | 0.019969456  | 8.024431637 | 0.251635686  | 0.806735732 | 0.806735732 | -5.601360116 |
| 1453818_a_at | -0.022470537 | 7.173368786 | -0.251632566 | 0.806738073 | 0.806738073 | -5.601360869 |
| 1429108_at   | 0.036378405  | 7.02059042  | 0.251626991  | 0.806742256 | 0.806742256 | -5.601362216 |
| 1443821_at   | 0.024090524  | 3.390160444 | 0.251622622  | 0.806745534 | 0.806745534 | -5.601363271 |
| 1421866_at   | 0.032928025  | 6.576467316 | 0.251600855  | 0.806761867 | 0.806761867 | -5.601368529 |
| 1433564_at   | 0.016529913  | 8.521946101 | 0.251599835  | 0.806762632 | 0.806762632 | -5.601368775 |
| 1441885_s_at | -0.021763142 | 3.247866589 | -0.251574864 | 0.80678137  | 0.80678137  | -5.601374806 |
| 1424772_at   | -0.024824037 | 6.01842104  | -0.251562968 | 0.806790296 | 0.806790296 | -5.601377679 |
| 1456988_at   | 0.023123687  | 4.375122295 | 0.251530918  | 0.806814344 | 0.806814344 | -5.601385418 |
| 1443146_at   | -0.025643787 | 6.446246833 | -0.251496342 | 0.806840289 | 0.806840289 | -5.601393766 |
| 1425628_a_at | 0.017566235  | 11.47529429 | 0.25147938   | 0.806853017 | 0.806853017 | -5.601397861 |
| 1420153_at   | -0.025350311 | 3.699729481 | -0.25144164  | 0.806881335 | 0.806881335 | -5.601406971 |
| 1452098_at   | 0.027525826  | 6.20088643  | 0.251425682  | 0.80689331  | 0.80689331  | -5.601410822 |
| 1431010_a_at | -0.023623181 | 4.792746798 | -0.251412343 | 0.806903319 | 0.806903319 | -5.601414042 |
| 1460398_at   | 0.022128344  | 7.789401212 | 0.251411109  | 0.806904245 | 0.806904245 | -5.60141434  |

|              |              |             |              |             |             |              |
|--------------|--------------|-------------|--------------|-------------|-------------|--------------|
| 1420273_x_at | -0.021225675 | 7.550396353 | -0.251397109 | 0.806914751 | 0.806914751 | -5.601417718 |
| 1433319_at   | -0.025100055 | 4.071262044 | -0.251323052 | 0.806970322 | 0.806970322 | -5.601435588 |
| 1448921_a_at | -0.032909862 | 8.262426257 | -0.251317298 | 0.80697464  | 0.80697464  | -5.601436976 |
| 1424657_at   | -0.021288757 | 9.477520339 | -0.251238594 | 0.807033701 | 0.807033701 | -5.601455961 |
| 1449750_at   | 0.020795416  | 8.078282023 | 0.251205893  | 0.80705824  | 0.80705824  | -5.601463847 |
| 1423359_at   | -0.026243091 | 4.21249284  | -0.251198753 | 0.807063598 | 0.807063598 | -5.601465569 |
| 1420573_at   | 0.025756552  | 3.375245996 | 0.251191243  | 0.807069234 | 0.807069234 | -5.60146738  |
| 1416656_at   | 0.019671507  | 11.11749772 | 0.251166015  | 0.807088165 | 0.807088165 | -5.601473463 |
| 1440344_at   | -0.023718313 | 5.49098361  | -0.25114018  | 0.807107553 | 0.807107553 | -5.601479691 |
| 1449638_at   | 0.017834032  | 5.876276905 | 0.251044448  | 0.807179395 | 0.807179395 | -5.601502767 |
| 1454297_at   | 0.016751381  | 3.906527394 | 0.251010751  | 0.807204683 | 0.807204683 | -5.601510887 |
| 1460155_at   | 0.015481     | 4.482533947 | 0.25098715   | 0.807222395 | 0.807222395 | -5.601516574 |
| 1422240_s_at | 0.023614329  | 4.555296604 | 0.25092007   | 0.807272737 | 0.807272737 | -5.601532734 |
| 1455704_at   | 0.019880662  | 6.218773762 | 0.250838083  | 0.807334267 | 0.807334267 | -5.601552479 |
| 1425487_at   | 0.034817753  | 6.726527316 | 0.250713272  | 0.80742794  | 0.80742794  | -5.601582527 |
| 1416743_at   | -0.023277531 | 9.167520793 | -0.250637731 | 0.807484636 | 0.807484636 | -5.601600705 |
| 1445863_at   | 0.028774481  | 3.876452962 | 0.250636284  | 0.807485722 | 0.807485722 | -5.601601054 |
| 1416204_at   | -0.022650472 | 4.650222681 | -0.250567284 | 0.80753751  | 0.80753751  | -5.601617653 |
| 1457185_at   | -0.042385728 | 6.048530082 | -0.250550997 | 0.807549734 | 0.807549734 | -5.601621571 |
| 1447214_at   | -0.020679472 | 3.770852184 | -0.250543833 | 0.807555111 | 0.807555111 | -5.601623294 |
| 1447998_at   | -0.019612701 | 3.946142733 | -0.250525039 | 0.807569217 | 0.807569217 | -5.601627814 |
| 1435192_at   | -0.016177278 | 4.536132419 | -0.250508973 | 0.807581276 | 0.807581276 | -5.601631678 |
| 1446749_at   | 0.021500853  | 3.386385881 | 0.250448431  | 0.807626717 | 0.807626717 | -5.601646236 |
| 1420601_at   | -0.017934047 | 3.655073642 | -0.250379388 | 0.80767854  | 0.80767854  | -5.601662834 |
| 1445987_at   | 0.04217248   | 5.50963288  | 0.250367537  | 0.807687435 | 0.807687435 | -5.601665682 |
| 1431775_at   | -0.028621927 | 3.598670764 | -0.250263451 | 0.807765563 | 0.807765563 | -5.601690695 |
| 1455092_at   | 0.022122829  | 9.305506035 | 0.250256846  | 0.807770521 | 0.807770521 | -5.601692282 |
| 1444667_at   | -0.025455264 | 5.336854638 | -0.250248855 | 0.807776519 | 0.807776519 | -5.601694202 |
| 1438066_at   | 0.020375125  | 4.947554749 | 0.250246079  | 0.807778603 | 0.807778603 | -5.601694869 |
| 1442274_at   | 0.025577012  | 6.003909327 | 0.250198238  | 0.807814514 | 0.807814514 | -5.601706361 |
| 1432038_at   | 0.015439218  | 3.227467924 | 0.250168331  | 0.807836963 | 0.807836963 | -5.601713544 |
| 1420157_s_at | -0.022107712 | 9.521785352 | -0.250159683 | 0.807843455 | 0.807843455 | -5.601715621 |
| 1443326_at   | -0.022727244 | 3.512159725 | -0.250108866 | 0.807881601 | 0.807881601 | -5.601727824 |
| 1426163_x_at | -0.015872983 | 12.1884886  | -0.250098227 | 0.807889587 | 0.807889587 | -5.601730378 |
| 1422617_at   | 0.025533436  | 3.149182042 | 0.250038673  | 0.807934291 | 0.807934291 | -5.601744676 |
| 1423294_at   | -0.017669163 | 12.95987689 | -0.250014975 | 0.80795208  | 0.80795208  | -5.601750364 |
| 1430326_s_at | 0.022392964  | 10.0964249  | 0.250002477  | 0.807961462 | 0.807961462 | -5.601753364 |
| 1451394_at   | -0.016386582 | 5.926917696 | -0.249928    | 0.808017371 | 0.808017371 | -5.601771236 |
| 1441943_x_at | 0.031762412  | 7.499577178 | 0.249912063  | 0.808029334 | 0.808029334 | -5.60177506  |
| 1436934_s_at | 0.017624339  | 9.862687046 | 0.249890992  | 0.808045153 | 0.808045153 | -5.601780115 |
| 1426479_a_at | 0.021634508  | 7.650269691 | 0.249883778  | 0.808050568 | 0.808050568 | -5.601781846 |
| 1443042_at   | -0.024363614 | 7.743620636 | -0.249810301 | 0.808105727 | 0.808105727 | -5.60179947  |
| 1441685_at   | -0.016757363 | 4.332275689 | -0.249803968 | 0.808110482 | 0.808110482 | -5.601800989 |
| 1420621_a_at | -0.017149437 | 10.81987487 | -0.249786509 | 0.808123589 | 0.808123589 | -5.601805176 |
| 1432585_at   | -0.018122265 | 5.551780735 | -0.249763305 | 0.808141008 | 0.808141008 | -5.60181074  |
| 1432138_at   | 0.018046586  | 3.924529341 | 0.249695925  | 0.808191592 | 0.808191592 | -5.601826895 |
| 1423248_at   | -0.019679437 | 9.667133587 | -0.249675469 | 0.808206949 | 0.808206949 | -5.601831798 |
| 1453302_at   | -0.020136538 | 6.743572345 | -0.249657473 | 0.80822046  | 0.80822046  | -5.601836112 |
| 1451549_at   | -0.024996964 | 5.301545102 | -0.249618167 | 0.808249969 | 0.808249969 | -5.601845532 |
| 1439828_at   | -0.020511306 | 4.461702909 | -0.249589803 | 0.808271263 | 0.808271263 | -5.601852329 |
| 1445259_at   | 0.027738994  | 5.053860473 | 0.249573845  | 0.808283244 | 0.808283244 | -5.601856153 |
| 1426526_s_at | -0.019734321 | 5.98279674  | -0.24946892  | 0.808362019 | 0.808362019 | -5.601881288 |
| 1417859_at   | 0.029210297  | 4.186636952 | 0.249441132  | 0.808382881 | 0.808382881 | -5.601887943 |

|              |              |             |              |             |             |              |
|--------------|--------------|-------------|--------------|-------------|-------------|--------------|
| 1426264_at   | -0.021363405 | 8.793958602 | -0.249412561 | 0.808404333 | 0.808404333 | -5.601894785 |
| 1432264_x_at | -0.016101546 | 10.29471986 | -0.249332446 | 0.808464483 | 0.808464483 | -5.601913965 |
| 1458615_at   | 0.020240707  | 5.887375822 | 0.249294062  | 0.808493302 | 0.808493302 | -5.601923153 |
| 1454285_at   | -0.029214397 | 3.214968409 | -0.249275302 | 0.808507387 | 0.808507387 | -5.601927643 |
| 1427990_at   | -0.021771595 | 7.590157095 | -0.249263479 | 0.808516265 | 0.808516265 | -5.601930472 |
| 1441641_at   | -0.018260784 | 4.805742041 | -0.249221674 | 0.808547653 | 0.808547653 | -5.601940476 |
| 1447181_s_at | -0.024766641 | 5.934164039 | -0.249218235 | 0.808550235 | 0.808550235 | -5.601941299 |
| 1446747_at   | -0.034205169 | 3.726566438 | -0.249166443 | 0.808589123 | 0.808589123 | -5.60195369  |
| 1435126_at   | 0.017501987  | 4.243060954 | 0.249165568  | 0.80858978  | 0.80858978  | -5.601953899 |
| 1457301_at   | -0.027313966 | 5.709298984 | -0.249165424 | 0.808589888 | 0.808589888 | -5.601953933 |
| 1445564_at   | 0.033520989  | 3.862661946 | 0.249143907  | 0.808606043 | 0.808606043 | -5.60195908  |
| 1429442_at   | -0.020958775 | 3.63168099  | -0.249114479 | 0.80862814  | 0.80862814  | -5.601966119 |
| 1444439_at   | 0.036748616  | 6.211323333 | 0.248997258  | 0.808716157 | 0.808716157 | -5.601994148 |
| 1420017_at   | -0.034785167 | 5.028744745 | -0.248937306 | 0.808761175 | 0.808761175 | -5.602008479 |
| 1454028_at   | -0.015370912 | 3.789972386 | -0.248935221 | 0.80876274  | 0.80876274  | -5.602008977 |
| 1420664_s_at | 0.018447105  | 6.798661664 | 0.248914631  | 0.808778201 | 0.808778201 | -5.602013898 |
| 1453793_at   | -0.01968356  | 4.850238408 | -0.248910829 | 0.808781056 | 0.808781056 | -5.602014806 |
| 1421810_at   | 0.02669262   | 9.447416435 | 0.248818958  | 0.808850042 | 0.808850042 | -5.602036758 |
| 1429144_at   | 0.015440639  | 8.995601119 | 0.248811657  | 0.808855525 | 0.808855525 | -5.602038502 |
| 1441297_at   | 0.042152617  | 5.567543514 | 0.2487758    | 0.808882451 | 0.808882451 | -5.602047067 |
| 1456296_at   | 0.026604077  | 7.429855683 | 0.248765964  | 0.808889837 | 0.808889837 | -5.602049416 |
| 1435119_at   | -0.026447038 | 3.762370484 | -0.248729506 | 0.808917214 | 0.808917214 | -5.602058123 |
| 1445463_at   | 0.043960495  | 5.239855176 | 0.248724281  | 0.808921138 | 0.808921138 | -5.602059371 |
| 1454239_at   | -0.019042818 | 4.573038593 | -0.248702229 | 0.808937698 | 0.808937698 | -5.602064637 |
| 1445229_at   | -0.02317815  | 5.695568786 | -0.248588823 | 0.80902286  | 0.80902286  | -5.60209171  |
| 1448204_at   | 0.023244588  | 9.708684265 | 0.248580657  | 0.809028992 | 0.809028992 | -5.602093659 |
| 1430900_at   | -0.022946854 | 4.753337528 | -0.248579985 | 0.809029497 | 0.809029497 | -5.602093819 |
| 1437100_x_at | -0.023590895 | 8.963391695 | -0.248559779 | 0.809044671 | 0.809044671 | -5.602098641 |
| 1415692_s_at | -0.0175382   | 11.2726771  | -0.248547448 | 0.809053931 | 0.809053931 | -5.602101584 |
| 1449445_x_at | -0.02155794  | 10.15035089 | -0.248541286 | 0.809058559 | 0.809058559 | -5.602103054 |
| 1417552_at   | 0.034804272  | 9.143846538 | 0.248458833  | 0.80912048  | 0.80912048  | -5.602122727 |
| 1459118_at   | -0.021262056 | 5.750819165 | -0.248420322 | 0.809149401 | 0.809149401 | -5.602131913 |
| 1425064_at   | -0.016973289 | 5.168710381 | -0.248411257 | 0.809156209 | 0.809156209 | -5.602134075 |
| 1449719_at   | 0.01818691   | 3.349904334 | 0.248408041  | 0.809158624 | 0.809158624 | -5.602134842 |
| 1420662_at   | 0.014885764  | 4.666824285 | 0.248397232  | 0.809166742 | 0.809166742 | -5.60213742  |
| 1438826_x_at | -0.020418785 | 3.891440693 | -0.248320004 | 0.809224741 | 0.809224741 | -5.602155835 |
| 1451544_at   | -0.019244953 | 5.277233936 | -0.248288604 | 0.809248323 | 0.809248323 | -5.602163321 |
| 1452137_at   | -0.019375837 | 7.424818483 | -0.248262489 | 0.809267936 | 0.809267936 | -5.602169546 |
| 1422358_at   | 0.031992636  | 4.053753638 | 0.248230767  | 0.809291761 | 0.809291761 | -5.602177107 |
| 1449756_at   | -0.02162862  | 4.715197382 | -0.248175274 | 0.809333438 | 0.809333438 | -5.602190332 |
| 1457864_at   | 0.024955399  | 5.42786071  | 0.248158659  | 0.809345916 | 0.809345916 | -5.60219429  |
| 1459679_s_at | 0.023231456  | 9.100852713 | 0.24814345   | 0.80935734  | 0.80935734  | -5.602197914 |
| 1458219_at   | -0.018471162 | 3.217615872 | -0.248085652 | 0.809400749 | 0.809400749 | -5.602211683 |
| 1436643_x_at | 0.015648958  | 6.482582545 | 0.248056233  | 0.809422845 | 0.809422845 | -5.60221869  |
| 1425195_a_at | -0.017837905 | 9.8161814   | -0.248030725 | 0.809442004 | 0.809442004 | -5.602224765 |
| 1450353_at   | 0.026310349  | 4.623832855 | 0.248022599  | 0.809448106 | 0.809448106 | -5.6022267   |
| 1452778_x_at | -0.015681239 | 11.31474615 | -0.248001701 | 0.809463803 | 0.809463803 | -5.602231677 |
| 1440492_at   | 0.028970904  | 5.660585757 | 0.247981074  | 0.809479295 | 0.809479295 | -5.602236588 |
| 1434387_at   | -0.017387121 | 7.688516752 | -0.247978538 | 0.8094812   | 0.8094812   | -5.602237192 |
| 1433189_at   | 0.020269042  | 4.654618022 | 0.24794191   | 0.809508712 | 0.809508712 | -5.602245912 |
| 1439822_at   | -0.027496832 | 3.498505889 | -0.247923569 | 0.809522487 | 0.809522487 | -5.602250278 |
| 1438892_at   | 0.040009971  | 6.967124412 | 0.247900756  | 0.809539622 | 0.809539622 | -5.602255709 |
| 1446308_at   | 0.021894385  | 4.043790198 | 0.247843384  | 0.809582715 | 0.809582715 | -5.602269363 |

|              |              |             |              |             |             |              |
|--------------|--------------|-------------|--------------|-------------|-------------|--------------|
| 1434578_x_at | 0.030522356  | 11.54972876 | 0.247790955  | 0.809622095 | 0.809622095 | -5.602281838 |
| 1418289_at   | 0.018009984  | 6.472098941 | 0.247763657  | 0.8096426   | 0.8096426   | -5.602288332 |
| 1444841_at   | -0.031074005 | 3.713125572 | -0.247761462 | 0.809644248 | 0.809644248 | -5.602288854 |
| 1458174_at   | 0.02285628   | 4.059371528 | 0.247751536  | 0.809651704 | 0.809651704 | -5.602291216 |
| 1430501_at   | 0.016641634  | 3.553566083 | 0.247749664  | 0.80965311  | 0.80965311  | -5.602291661 |
| 1438648_x_at | -0.016624948 | 5.998546204 | -0.247729628 | 0.80966816  | 0.80966816  | -5.602296427 |
| 1418610_at   | -0.021114937 | 3.481448117 | -0.247713242 | 0.809680468 | 0.809680468 | -5.602300324 |
| 1452803_at   | 0.022331236  | 6.813313526 | 0.247696826  | 0.809692799 | 0.809692799 | -5.602304229 |
| 1420310_at   | 0.121409527  | 5.248685761 | 0.247663778  | 0.809717623 | 0.809717623 | -5.602312088 |
| 1455904_at   | -0.019424512 | 10.43762376 | -0.247604074 | 0.80976247  | 0.80976247  | -5.602326284 |
| 1440562_at   | -0.034588768 | 4.754001504 | -0.24754235  | 0.809808836 | 0.809808836 | -5.602340956 |
| 1430023_at   | -0.029511312 | 7.455956827 | -0.247538195 | 0.809811957 | 0.809811957 | -5.602341944 |
| 1422153_a_at | 0.028657967  | 3.954128463 | 0.247507012  | 0.809835381 | 0.809835381 | -5.602349355 |
| 1427652_x_at | 0.030959685  | 5.222472693 | 0.247476209  | 0.80985852  | 0.80985852  | -5.602356675 |
| 1431333_at   | -0.018032944 | 4.760247217 | -0.247426479 | 0.809895877 | 0.809895877 | -5.602368491 |
| 1459150_at   | -0.026363718 | 6.583387951 | -0.247336611 | 0.809963387 | 0.809963387 | -5.602389837 |
| 1415913_at   | -0.016336252 | 7.160496481 | -0.247281821 | 0.810004547 | 0.810004547 | -5.602402848 |
| 1429070_at   | -0.019729461 | 5.742164959 | -0.24725788  | 0.810022531 | 0.810022531 | -5.602408532 |
| 1430045_at   | 0.019642022  | 7.791359595 | 0.247214744  | 0.810054937 | 0.810054937 | -5.602418772 |
| 1442307_at   | -0.022358351 | 5.915633658 | -0.247200365 | 0.810065739 | 0.810065739 | -5.602422185 |
| 1453638_at   | -0.016430544 | 4.384336773 | -0.247193189 | 0.81007113  | 0.81007113  | -5.602423888 |
| 1419174_at   | 0.015221228  | 9.364386496 | 0.24718187   | 0.810079634 | 0.810079634 | -5.602426575 |
| 1440899_at   | -0.026082113 | 3.671986289 | -0.247109233 | 0.810134203 | 0.810134203 | -5.602443812 |
| 1432194_at   | 0.033703604  | 4.057642272 | 0.247084244  | 0.810152976 | 0.810152976 | -5.602449741 |
| 1428689_at   | -0.020476082 | 8.20221547  | -0.247071229 | 0.810162754 | 0.810162754 | -5.602452829 |
| 1425602_a_at | -0.024634155 | 6.399863453 | -0.247037987 | 0.810187728 | 0.810187728 | -5.602460714 |
| 1454802_x_at | 0.022032376  | 10.00553174 | 0.246966771  | 0.810241232 | 0.810241232 | -5.602477605 |
| 1427205_x_at | 0.031487471  | 7.598580811 | 0.246948762  | 0.810254762 | 0.810254762 | -5.602481875 |
| 1442539_at   | -0.022013016 | 5.331244093 | -0.246900978 | 0.810290662 | 0.810290662 | -5.602493205 |
| 1450415_at   | -0.016556298 | 3.532372867 | -0.246900857 | 0.810290753 | 0.810290753 | -5.602493233 |
| 1419926_at   | 0.03600642   | 4.422015445 | 0.246879817  | 0.810306561 | 0.810306561 | -5.602498221 |
| 1415920_at   | 0.01869434   | 10.33677003 | 0.246824022  | 0.81034848  | 0.81034848  | -5.602511446 |
| 1451738_at   | -0.018825949 | 9.542914465 | -0.246756756 | 0.81039902  | 0.81039902  | -5.602527387 |
| 1417909_at   | -0.029775785 | 4.215101693 | -0.246750949 | 0.810403383 | 0.810403383 | -5.602528762 |
| 1415947_at   | -0.025019904 | 8.363255886 | -0.246741675 | 0.810410351 | 0.810410351 | -5.60253096  |
| 1434251_at   | 0.018048983  | 10.46528774 | 0.246717978  | 0.810428155 | 0.810428155 | -5.602536574 |
| 1436454_x_at | 0.016372564  | 10.2811171  | 0.246708001  | 0.810435651 | 0.810435651 | -5.602538937 |
| 1443762_s_at | -0.019220477 | 9.061541823 | -0.246707104 | 0.810436326 | 0.810436326 | -5.60253915  |
| 1422899_at   | -0.022128705 | 4.500600353 | -0.24664448  | 0.810483378 | 0.810483378 | -5.602553983 |
| 1441483_at   | -0.019452536 | 4.92203172  | -0.246642979 | 0.810484506 | 0.810484506 | -5.602554339 |
| 1448368_at   | -0.016788258 | 8.261424514 | -0.246630212 | 0.810494099 | 0.810494099 | -5.602557362 |
| 1447757_x_at | 0.056252444  | 4.80653785  | 0.246487881  | 0.810601043 | 0.810601043 | -5.60259106  |
| 1436650_at   | 0.024235464  | 6.344446504 | 0.24646593   | 0.810617537 | 0.810617537 | -5.602596255 |
| 1431850_at   | -0.021822546 | 4.611215534 | -0.246436651 | 0.810639537 | 0.810639537 | -5.602603184 |
| 1446036_at   | 0.029266385  | 5.464809217 | 0.246419093  | 0.81065273  | 0.81065273  | -5.602607338 |
| 1437353_at   | -0.016755925 | 8.683005675 | -0.246413258 | 0.810657115 | 0.810657115 | -5.602608719 |
| 1421619_at   | 0.018419556  | 7.499220812 | 0.246399967  | 0.810667102 | 0.810667102 | -5.602611864 |
| 1451015_at   | 0.024808362  | 10.55400031 | 0.246392044  | 0.810673056 | 0.810673056 | -5.602613738 |
| 1428580_at   | 0.015350014  | 8.748119545 | 0.246389357  | 0.810675075 | 0.810675075 | -5.602614374 |
| 1434265_s_at | -0.031779918 | 7.937178711 | -0.246373592 | 0.81068692  | 0.81068692  | -5.602618104 |
| 1426578_s_at | 0.021694614  | 8.042304597 | 0.246364086  | 0.810694064 | 0.810694064 | -5.602620353 |
| 1423712_a_at | -0.01503788  | 10.51260876 | -0.246356543 | 0.810699732 | 0.810699732 | -5.602622137 |
| 1416158_at   | 0.042769292  | 6.915593643 | 0.246348165  | 0.810706027 | 0.810706027 | -5.602624119 |

|              |              |             |              |             |             |              |
|--------------|--------------|-------------|--------------|-------------|-------------|--------------|
| 1417774_at   | -0.022465098 | 8.431584815 | -0.246332765 | 0.810717599 | 0.810717599 | -5.602627762 |
| 1445705_x_at | -0.016069874 | 3.524355171 | -0.246325655 | 0.810722942 | 0.810722942 | -5.602629444 |
| 1424720_at   | -0.023632875 | 9.256360412 | -0.246325277 | 0.810723226 | 0.810723226 | -5.602629533 |
| 1437173_at   | 0.019647428  | 9.729178072 | 0.246324917  | 0.810723496 | 0.810723496 | -5.602629618 |
| 1427232_at   | 0.027490675  | 8.37060165  | 0.246233252  | 0.810792376 | 0.810792376 | -5.602651296 |
| 1445988_at   | -0.019644278 | 6.081487867 | -0.246222299 | 0.810800607 | 0.810800607 | -5.602653886 |
| 1439442_x_at | 0.031625592  | 6.124528833 | 0.246184285  | 0.810829173 | 0.810829173 | -5.602662873 |
| 1435774_at   | 0.023081619  | 7.418530126 | 0.246181445  | 0.810831307 | 0.810831307 | -5.602663544 |
| 1426760_at   | 0.015867271  | 8.347866864 | 0.246119821  | 0.810877614 | 0.810877614 | -5.60267811  |
| 1416863_at   | -0.020888917 | 7.910203788 | -0.246100319 | 0.81089227  | 0.81089227  | -5.602682719 |
| 1426664_x_at | -0.018452841 | 5.753610688 | -0.246074268 | 0.810911846 | 0.810911846 | -5.602688874 |
| 1442340_x_at | -0.072942004 | 8.398292096 | -0.246059891 | 0.810922651 | 0.810922651 | -5.602692272 |
| 1446448_at   | -0.025345927 | 5.768661177 | -0.246051808 | 0.810928725 | 0.810928725 | -5.602694182 |
| 1458745_at   | 0.018322325  | 3.079584202 | 0.246036293  | 0.810940384 | 0.810940384 | -5.602697847 |
| 1456944_at   | -0.021066944 | 4.519140051 | -0.246031354 | 0.810944096 | 0.810944096 | -5.602699014 |
| 1434770_at   | 0.017774398  | 7.961505112 | 0.246024626  | 0.810949151 | 0.810949151 | -5.602700603 |
| 1456354_at   | -0.016719667 | 4.508335951 | -0.245953185 | 0.811002839 | 0.811002839 | -5.602717479 |
| 1443951_at   | 0.024229651  | 5.241498477 | 0.245919997  | 0.81102778  | 0.81102778  | -5.602725316 |
| 1439345_at   | -0.01514865  | 3.428052156 | -0.24582953  | 0.811095768 | 0.811095768 | -5.602746676 |
| 1423988_at   | -0.014640206 | 3.802846381 | -0.245823372 | 0.811100395 | 0.811100395 | -5.60274813  |
| 1440166_x_at | 0.018831578  | 3.520898628 | 0.245790081  | 0.811125415 | 0.811125415 | -5.602755988 |
| 1429874_at   | 0.021220649  | 3.423809496 | 0.245703214  | 0.8111907   | 0.8111907   | -5.602776487 |
| 1427715_a_at | -0.017706067 | 3.764503987 | -0.24570244  | 0.811191281 | 0.811191281 | -5.60277667  |
| 1460188_at   | -0.039744402 | 6.487894239 | -0.245691239 | 0.811199699 | 0.811199699 | -5.602779312 |
| 1428482_at   | -0.017663827 | 8.262589702 | -0.245656652 | 0.811225693 | 0.811225693 | -5.602787472 |
| 1434370_s_at | 0.017368055  | 7.66642503  | 0.245603482  | 0.811265654 | 0.811265654 | -5.602800013 |
| 1446186_at   | 0.016575475  | 3.329798996 | 0.245520153  | 0.811328282 | 0.811328282 | -5.602819663 |
| 1433483_s_at | -0.016503756 | 3.420296708 | -0.245466448 | 0.811368647 | 0.811368647 | -5.602832324 |
| 1429438_at   | -0.032830435 | 6.917038312 | -0.245444554 | 0.811385103 | 0.811385103 | -5.602837484 |
| 1415821_at   | -0.018531291 | 10.66480328 | -0.245429448 | 0.811396456 | 0.811396456 | -5.602841045 |
| 1439705_at   | -0.017362642 | 6.781451854 | -0.245390391 | 0.811425812 | 0.811425812 | -5.602850249 |
| 1459134_at   | -0.023002581 | 6.084028202 | -0.245366385 | 0.811443855 | 0.811443855 | -5.602855906 |
| 1417692_at   | 0.016984882  | 9.14638584  | 0.245295619  | 0.811497046 | 0.811497046 | -5.602872578 |
| 1444906_at   | 0.016310094  | 5.110394827 | 0.245287281  | 0.811503312 | 0.811503312 | -5.602874541 |
| 1451050_at   | 0.018962836  | 8.162161488 | 0.245264476  | 0.811520454 | 0.811520454 | -5.602879913 |
| 1438612_a_at | 0.019577197  | 3.212505635 | 0.245167435  | 0.811593395 | 0.811593395 | -5.602902764 |
| 1420290_at   | -0.0153951   | 3.501922212 | -0.245095367 | 0.811647566 | 0.811647566 | -5.602919729 |
| 1440368_at   | -0.019273301 | 6.452384559 | -0.245067008 | 0.811668883 | 0.811668883 | -5.602926404 |
| 1422568_at   | 0.016732489  | 10.56625498 | 0.245061816  | 0.811672785 | 0.811672785 | -5.602927625 |
| 1432317_at   | 0.021800647  | 4.486982858 | 0.245014386  | 0.811708438 | 0.811708438 | -5.602938786 |
| 1416076_at   | -0.021900956 | 9.370173102 | -0.244998606 | 0.8117203   | 0.8117203   | -5.602942499 |
| 1436357_at   | -0.01778736  | 8.451301834 | -0.244981428 | 0.811733213 | 0.811733213 | -5.602946541 |
| 1428686_at   | 0.025530672  | 5.441415696 | 0.24497973   | 0.811734489 | 0.811734489 | -5.60294694  |
| 1433470_a_at | -0.017790859 | 9.514140405 | -0.244954839 | 0.811753199 | 0.811753199 | -5.602952796 |
| 1436456_at   | 0.023700158  | 6.279622547 | 0.244953118  | 0.811754493 | 0.811754493 | -5.6029532   |
| 1445694_at   | -0.026655139 | 6.557867632 | -0.244927511 | 0.811773742 | 0.811773742 | -5.602959224 |
| 1451925_at   | 0.02706696   | 5.426638329 | 0.244890704  | 0.811801411 | 0.811801411 | -5.60296788  |
| 1445478_at   | 0.017412918  | 3.796101335 | 0.244878292  | 0.81181074  | 0.81181074  | -5.602970799 |
| 1442919_at   | 0.015213218  | 7.27455415  | 0.244815089  | 0.811858252 | 0.811858252 | -5.60298566  |
| 1437599_at   | 0.017505579  | 6.362394723 | 0.244802858  | 0.811867447 | 0.811867447 | -5.602988536 |
| 1424821_at   | 0.023059088  | 10.6227225  | 0.244801884  | 0.811868179 | 0.811868179 | -5.602988765 |
| 1418471_at   | 0.027636956  | 7.126145706 | 0.24479613   | 0.811872504 | 0.811872504 | -5.602990117 |
| 1446766_at   | 0.018330765  | 3.821198573 | 0.244791465  | 0.811876011 | 0.811876011 | -5.602991214 |

|              |              |             |              |             |             |              |
|--------------|--------------|-------------|--------------|-------------|-------------|--------------|
| 1446685_at   | -0.017221803 | 3.536307435 | -0.244784429 | 0.8118813   | 0.8118813   | -5.602992868 |
| 1447302_at   | -0.025722002 | 5.795969449 | -0.244727147 | 0.811924362 | 0.811924362 | -5.603006332 |
| 1440600_at   | 0.029502597  | 4.085465414 | 0.244717593  | 0.811931544 | 0.811931544 | -5.603008577 |
| 1434371_x_at | -0.01504771  | 9.409739431 | -0.244695407 | 0.811948223 | 0.811948223 | -5.603013791 |
| 1438180_x_at | 0.016532864  | 12.02455771 | 0.244692905  | 0.811950103 | 0.811950103 | -5.603014379 |
| 1445185_at   | 0.018825833  | 3.833716785 | 0.244663914  | 0.811971898 | 0.811971898 | -5.603021191 |
| 1429953_at   | -0.019709122 | 3.89671985  | -0.244607288 | 0.812014467 | 0.812014467 | -5.603034494 |
| 1437651_a_at | 0.018999406  | 7.107008937 | 0.244578998  | 0.812035735 | 0.812035735 | -5.603041139 |
| 1442409_at   | -0.022815904 | 4.7868365   | -0.244577635 | 0.81203676  | 0.81203676  | -5.603041459 |
| 1438539_at   | 0.01869162   | 4.744762744 | 0.244552572  | 0.812055602 | 0.812055602 | -5.603047346 |
| 1415711_at   | 0.0169232    | 9.728368801 | 0.24454574   | 0.812060738 | 0.812060738 | -5.60304895  |
| 1431369_at   | -0.022027988 | 3.623315831 | -0.244524575 | 0.81207665  | 0.81207665  | -5.603053921 |
| 1460577_at   | -0.020082649 | 8.896726619 | -0.244514685 | 0.812084085 | 0.812084085 | -5.603056243 |
| 1428149_at   | -0.034902934 | 4.509043284 | -0.244502251 | 0.812093433 | 0.812093433 | -5.603059163 |
| 1454453_at   | -0.022369304 | 4.602980896 | -0.244489415 | 0.812103083 | 0.812103083 | -5.603062177 |
| 1441291_at   | 0.023151899  | 4.072029567 | 0.244431555  | 0.812146582 | 0.812146582 | -5.60307576  |
| 1418274_at   | 0.015517893  | 10.43613302 | 0.244426003  | 0.812150756 | 0.812150756 | -5.603077063 |
| 1450794_at   | -0.02452026  | 4.718700758 | -0.244406738 | 0.812165239 | 0.812165239 | -5.603081585 |
| 1421465_at   | 0.022854909  | 4.484858942 | 0.244403609  | 0.812167592 | 0.812167592 | -5.60308232  |
| 1426549_at   | -0.020370037 | 4.009201101 | -0.244325113 | 0.812226607 | 0.812226607 | -5.603100741 |
| 1440598_at   | 0.014961202  | 3.057412058 | 0.244268341  | 0.812269291 | 0.812269291 | -5.60311406  |
| 1448963_at   | -0.016337271 | 9.391176646 | -0.244261674 | 0.812274303 | 0.812274303 | -5.603115624 |
| 1423570_at   | -0.018878511 | 7.767393549 | -0.244259727 | 0.812275767 | 0.812275767 | -5.603116081 |
| 1454259_s_at | -0.021659962 | 3.815325728 | -0.244244601 | 0.81228714  | 0.81228714  | -5.603119629 |
| 1452080_a_at | -0.017838072 | 8.588350453 | -0.244209271 | 0.812313703 | 0.812313703 | -5.603127915 |
| 1432849_at   | -0.023108171 | 4.958931799 | -0.244208086 | 0.812314593 | 0.812314593 | -5.603128193 |
| 1418708_at   | -0.017792201 | 5.264490877 | -0.244160358 | 0.812350478 | 0.812350478 | -5.603139386 |
| 1430292_a_at | 0.020778423  | 8.58197831  | 0.244106182  | 0.812391211 | 0.812391211 | -5.603152088 |
| 1449240_at   | -0.020285661 | 3.507305448 | -0.244077861 | 0.812412505 | 0.812412505 | -5.603158726 |
| 1438192_s_at | -0.016767683 | 8.386506203 | -0.244021568 | 0.812454831 | 0.812454831 | -5.60317192  |
| 1429256_at   | 0.047166049  | 6.258191923 | 0.243943472  | 0.812513552 | 0.812513552 | -5.603190219 |
| 1432553_at   | 0.024191367  | 4.498376119 | 0.243934227  | 0.812520504 | 0.812520504 | -5.603192385 |
| 1421789_s_at | 0.026911391  | 5.454322321 | 0.243919147  | 0.812531842 | 0.812531842 | -5.603195918 |
| 1435498_at   | -0.018224867 | 8.598601252 | -0.243913561 | 0.812536042 | 0.812536042 | -5.603197226 |
| 1455825_s_at | 0.03163265   | 7.221405129 | 0.243911255  | 0.812537776 | 0.812537776 | -5.603197766 |
| 1456131_x_at | 0.022832298  | 8.53793318  | 0.243901208  | 0.812545331 | 0.812545331 | -5.60320012  |
| 1429975_at   | 0.026175342  | 4.34870511  | 0.243877742  | 0.812562975 | 0.812562975 | -5.603205616 |
| 1451111_at   | 0.021205128  | 7.217609901 | 0.243872677  | 0.812566784 | 0.812566784 | -5.603206803 |
| 1435442_at   | 0.016942056  | 9.74375954  | 0.243868736  | 0.812569747 | 0.812569747 | -5.603207726 |
| 1421743_a_at | 0.021422375  | 11.82761377 | 0.243840115  | 0.812591268 | 0.812591268 | -5.603214428 |
| 1454346_at   | 0.022223786  | 3.993987669 | 0.243805523  | 0.812617279 | 0.812617279 | -5.603222529 |
| 1425414_at   | 0.02555596   | 4.552671734 | 0.24375891   | 0.812652329 | 0.812652329 | -5.603233442 |
| 1421289_at   | -0.024469671 | 3.908596873 | -0.243755926 | 0.812654573 | 0.812654573 | -5.60323414  |
| 1455118_at   | 0.022229732  | 7.34600038  | 0.243755457  | 0.812654925 | 0.812654925 | -5.60323425  |
| 1441358_at   | 0.027334996  | 6.097562295 | 0.243697969  | 0.812698154 | 0.812698154 | -5.603247706 |
| 1433967_at   | 0.019017829  | 3.522503976 | 0.243691914  | 0.812702707 | 0.812702707 | -5.603249124 |
| 1451762_a_at | 0.028140202  | 5.462266782 | 0.243690073  | 0.812704091 | 0.812704091 | -5.603249554 |
| 1416990_at   | 0.021073842  | 9.489972322 | 0.243688764  | 0.812705076 | 0.812705076 | -5.603249861 |
| 1421398_at   | 0.024082526  | 3.321617789 | 0.243674276  | 0.81271597  | 0.81271597  | -5.603253251 |
| 1432299_at   | -0.024302702 | 3.946683912 | -0.243669445 | 0.812719603 | 0.812719603 | -5.603254382 |
| 1417571_at   | -0.021301063 | 8.481705365 | -0.243577048 | 0.812789083 | 0.812789083 | -5.603276    |
| 1434513_at   | -0.022474101 | 8.427216407 | -0.243576234 | 0.812789695 | 0.812789695 | -5.603276191 |
| 1446825_at   | 0.015386773  | 3.715270479 | 0.243520036  | 0.812831956 | 0.812831956 | -5.603289336 |

|              |              |             |              |             |             |              |
|--------------|--------------|-------------|--------------|-------------|-------------|--------------|
| 1421953_at   | 0.02570797   | 6.825355545 | 0.24342139   | 0.812906138 | 0.812906138 | -5.603312402 |
| 1435118_at   | 0.01927995   | 8.086352603 | 0.243363029  | 0.812950026 | 0.812950026 | -5.603326044 |
| 1421357_at   | 0.015071834  | 4.920026952 | 0.243341705  | 0.812966063 | 0.812966063 | -5.603331028 |
| 1437437_x_at | 0.018606337  | 9.888804252 | 0.243285367  | 0.81300843  | 0.81300843  | -5.603344193 |
| 1441906_x_at | -0.029817445 | 6.889714313 | -0.243276689 | 0.813014956 | 0.813014956 | -5.60334622  |
| 1428024_at   | 0.017329818  | 5.087379565 | 0.243259677  | 0.813027751 | 0.813027751 | -5.603350195 |
| 1430012_at   | 0.029036089  | 8.424521455 | 0.243164493  | 0.813099334 | 0.813099334 | -5.603372429 |
| 1420506_a_at | -0.018097511 | 4.439870367 | -0.243150642 | 0.813109751 | 0.813109751 | -5.603375663 |
| 1447598_x_at | -0.020149998 | 3.395246543 | -0.243102326 | 0.813146089 | 0.813146089 | -5.603386945 |
| 1431613_a_at | 0.017091172  | 4.495989553 | 0.242972061  | 0.81324406  | 0.81324406  | -5.603417352 |
| 1453245_at   | -0.032577311 | 6.760523054 | -0.242950753 | 0.813260086 | 0.813260086 | -5.603422324 |
| 1453284_at   | 0.025122653  | 4.23245921  | 0.24281127   | 0.813364993 | 0.813364993 | -5.603454861 |
| 1418665_at   | 0.020920979  | 7.407347154 | 0.24276485   | 0.813399908 | 0.813399908 | -5.603465685 |
| 1422718_at   | -0.022566765 | 5.904915688 | -0.242763563 | 0.813400876 | 0.813400876 | -5.603465985 |
| 1427690_a_at | -0.014311724 | 4.224590752 | -0.242760731 | 0.813403006 | 0.813403006 | -5.603466646 |
| 1451243_at   | -0.022377766 | 8.053430377 | -0.242752893 | 0.813408901 | 0.813408901 | -5.603468473 |
| 1418467_at   | -0.029285252 | 8.568611654 | -0.242672585 | 0.813469305 | 0.813469305 | -5.603487194 |
| 1452118_at   | -0.019808624 | 7.760044885 | -0.242594152 | 0.813528301 | 0.813528301 | -5.603505472 |
| 1444985_at   | -0.021028463 | 4.115178805 | -0.24257096  | 0.813545745 | 0.813545745 | -5.603510875 |
| 1445010_at   | -0.026018766 | 4.076344857 | -0.242561327 | 0.813552991 | 0.813552991 | -5.603513119 |
| 1426824_at   | 0.020987654  | 9.571093382 | 0.2425529    | 0.81355933  | 0.81355933  | -5.603515082 |
| 1453952_at   | -0.019541736 | 4.331586218 | -0.242510708 | 0.813591066 | 0.813591066 | -5.603524911 |
| 1442405_at   | 0.022905856  | 5.33731854  | 0.242475126  | 0.813617831 | 0.813617831 | -5.603533198 |
| 1429342_s_at | -0.018764272 | 5.290266357 | -0.242471232 | 0.81362076  | 0.81362076  | -5.603534105 |
| 1457700_at   | -0.022389071 | 4.364437923 | -0.24245138  | 0.813635693 | 0.813635693 | -5.603538728 |
| 1452695_at   | -0.020496215 | 3.574442639 | -0.242418852 | 0.813660161 | 0.813660161 | -5.603546302 |
| 1424238_at   | -0.020476669 | 8.24413     | -0.242329104 | 0.813727672 | 0.813727672 | -5.603567194 |
| 1455942_at   | -0.036599666 | 8.439477567 | -0.242278305 | 0.813765885 | 0.813765885 | -5.603579016 |
| 1456024_at   | 0.025981601  | 5.221794044 | 0.24227414   | 0.813769017 | 0.813769017 | -5.603579985 |
| 1458885_at   | -0.021556162 | 3.801559586 | -0.242255882 | 0.813782752 | 0.813782752 | -5.603584234 |
| 1429956_at   | -0.034372055 | 4.294051025 | -0.24220756  | 0.813819103 | 0.813819103 | -5.603595476 |
| 1435699_at   | -0.018812654 | 6.007273245 | -0.242162232 | 0.813853201 | 0.813853201 | -5.60360602  |
| 1423556_at   | 0.023225339  | 4.358347703 | 0.242122518  | 0.813883077 | 0.813883077 | -5.603615256 |
| 1439334_at   | -0.016520282 | 3.283693287 | -0.242095509 | 0.813903395 | 0.813903395 | -5.603621537 |
| 1454502_at   | 0.02148769   | 6.132859199 | 0.242087352  | 0.813909531 | 0.813909531 | -5.603623434 |
| 1424281_at   | 0.029196899  | 8.283927679 | 0.242087079  | 0.813909736 | 0.813909736 | -5.603623497 |
| 1445925_at   | 0.029407444  | 4.298987686 | 0.24208512   | 0.81391121  | 0.81391121  | -5.603623953 |
| 1454426_at   | 0.015893673  | 3.931061277 | 0.242037327  | 0.813947164 | 0.813947164 | -5.603635064 |
| 1437717_x_at | -0.024650255 | 10.0321682  | -0.24200236  | 0.81397347  | 0.81397347  | -5.603643193 |
| 1420001_at   | -0.016428625 | 4.634814122 | -0.24197033  | 0.813997566 | 0.813997566 | -5.603650637 |
| 1448942_at   | 0.015993194  | 9.858722445 | 0.241952996  | 0.814010607 | 0.814010607 | -5.603654666 |
| 1426017_a_at | 0.015050655  | 7.164939449 | 0.24190551   | 0.814046331 | 0.814046331 | -5.6036657   |
| 1436086_at   | -0.026588182 | 5.943539071 | -0.24188449  | 0.814062145 | 0.814062145 | -5.603670584 |
| 1458496_at   | 0.030566149  | 4.554974167 | 0.241872004  | 0.814071538 | 0.814071538 | -5.603673484 |
| 1430020_x_at | -0.017027278 | 11.18425599 | -0.241853782 | 0.814085248 | 0.814085248 | -5.603677718 |
| 1458078_at   | -0.019170138 | 7.72823588  | -0.241834021 | 0.814100114 | 0.814100114 | -5.603682308 |
| 1458053_at   | 0.028689626  | 6.626638549 | 0.241810559  | 0.814117766 | 0.814117766 | -5.603687757 |
| 1427313_at   | -0.020329405 | 3.764360451 | -0.241791216 | 0.814132318 | 0.814132318 | -5.60369225  |
| 1456972_at   | -0.023010158 | 4.180909843 | -0.241782041 | 0.81413922  | 0.81413922  | -5.60369438  |
| 1456664_x_at | -0.02298109  | 11.71724228 | -0.241757977 | 0.814157325 | 0.814157325 | -5.603699968 |
| 1433765_at   | -0.027929014 | 7.015734993 | -0.241698784 | 0.814201859 | 0.814201859 | -5.603713712 |
| 1458471_at   | 0.026921525  | 4.432401565 | 0.241635623  | 0.814249379 | 0.814249379 | -5.603728373 |
| 1459076_at   | 0.018024466  | 3.491261229 | 0.241626935  | 0.814255916 | 0.814255916 | -5.603730389 |



|              |              |             |              |             |             |              |
|--------------|--------------|-------------|--------------|-------------|-------------|--------------|
| 1454467_at   | 0.015585364  | 4.131552341 | 0.241625409  | 0.814257064 | 0.814257064 | -5.603730743 |
| 1415717_at   | -0.015183588 | 8.243330178 | -0.241583123 | 0.814288879 | 0.814288879 | -5.603740556 |
| 1451163_at   | 0.018731047  | 7.9481012   | 0.241505522  | 0.814347265 | 0.814347265 | -5.60375856  |
| 1433876_at   | -0.025048435 | 4.308544786 | -0.241488822 | 0.81435983  | 0.81435983  | -5.603762434 |
| 1435352_at   | 0.016607867  | 7.626003384 | 0.241469045  | 0.81437471  | 0.81437471  | -5.603767021 |
| 1450646_at   | 0.018076037  | 8.822957091 | 0.241466175  | 0.81437687  | 0.81437687  | -5.603767686 |
| 1422661_at   | 0.018676504  | 7.195408726 | 0.241416144  | 0.814414514 | 0.814414514 | -5.603779289 |
| 1426558_x_at | 0.034782061  | 9.468976616 | 0.241399408  | 0.814427106 | 0.814427106 | -5.60378317  |
| 1435538_at   | 0.015856104  | 8.769166125 | 0.241397514  | 0.814428531 | 0.814428531 | -5.603783609 |
| 1455067_at   | -0.029364006 | 5.339450385 | -0.241390017 | 0.814434172 | 0.814434172 | -5.603785347 |
| 1424726_at   | -0.019833631 | 7.936020875 | -0.241347772 | 0.814465959 | 0.814465959 | -5.603795141 |
| 1452442_at   | -0.024066343 | 5.150622762 | -0.241330888 | 0.814478663 | 0.814478663 | -5.603799055 |
| 1437458_x_at | 0.026903316  | 9.105450971 | 0.241308516  | 0.814495496 | 0.814495496 | -5.603804241 |
| 1426752_at   | -0.0162061   | 7.963919723 | -0.241302021 | 0.814500383 | 0.814500383 | -5.603805746 |
| 1446464_at   | -0.018854506 | 6.564286924 | -0.241286781 | 0.81451185  | 0.81451185  | -5.603809278 |
| 1423127_at   | 0.024398594  | 9.724378287 | 0.241240935  | 0.814546347 | 0.814546347 | -5.603819902 |
| 1430846_at   | 0.02636867   | 5.149160252 | 0.241218593  | 0.814563158 | 0.814563158 | -5.603825079 |
| 1456566_x_at | -0.018235933 | 9.768007337 | -0.241180693 | 0.814591677 | 0.814591677 | -5.60383386  |
| 1441374_at   | 0.01764349   | 3.102985143 | 0.241165542  | 0.814603077 | 0.814603077 | -5.60383737  |
| 1437671_x_at | 0.039851756  | 8.809010729 | 0.240930294  | 0.814780099 | 0.814780099 | -5.603891838 |
| 1454986_at   | 0.022516362  | 6.216753161 | 0.240914888  | 0.814791692 | 0.814791692 | -5.603895403 |
| 1454697_at   | -0.017963464 | 10.59196484 | -0.240890563 | 0.814809997 | 0.814809997 | -5.603901032 |
| 1446833_at   | -0.02980734  | 5.518620909 | -0.240863037 | 0.814830711 | 0.814830711 | -5.6039074   |
| 1450562_at   | -0.021347746 | 4.029702819 | -0.240839178 | 0.814848665 | 0.814848665 | -5.60391292  |
| 1456035_at   | 0.024593312  | 3.354988767 | 0.240793388  | 0.814883125 | 0.814883125 | -5.603923512 |
| 1427206_at   | 0.021801706  | 7.145276924 | 0.240776437  | 0.814895881 | 0.814895881 | -5.603927433 |
| 1435172_at   | -0.021832199 | 3.719164259 | -0.240730689 | 0.814930308 | 0.814930308 | -5.603938012 |
| 1430723_at   | 0.022932074  | 4.138675802 | 0.240719662  | 0.814938607 | 0.814938607 | -5.603940562 |
| 1424282_at   | -0.015691874 | 6.202283156 | -0.240711948 | 0.814944412 | 0.814944412 | -5.603942346 |
| 1425924_at   | 0.016769298  | 6.757980389 | 0.240657552  | 0.814985348 | 0.814985348 | -5.603954921 |
| 1449140_at   | 0.033498727  | 8.759086857 | 0.240656462  | 0.814986169 | 0.814986169 | -5.603955173 |
| 1442854_at   | -0.028615319 | 4.53717255  | -0.240628283 | 0.815007375 | 0.815007375 | -5.603961687 |
| 1457208_at   | -0.018148184 | 4.63183419  | -0.240615295 | 0.815017149 | 0.815017149 | -5.603964689 |
| 1444764_at   | 0.02012597   | 6.733514325 | 0.240533957  | 0.815078363 | 0.815078363 | -5.603983485 |
| 1452123_s_at | 0.029323929  | 7.844178158 | 0.240467539  | 0.815128349 | 0.815128349 | -5.603998828 |
| 1445715_at   | 0.026690421  | 4.534073553 | 0.240423518  | 0.81516148  | 0.81516148  | -5.604008996 |
| 1453916_at   | -0.020512127 | 3.749673023 | -0.240416058 | 0.815167094 | 0.815167094 | -5.604010719 |
| 1441334_at   | -0.022037791 | 4.539877357 | -0.240394352 | 0.815183431 | 0.815183431 | -5.604015731 |
| 1445470_at   | 0.017251657  | 4.01743489  | 0.240371139  | 0.815200901 | 0.815200901 | -5.604021091 |
| 1443037_at   | -0.016280766 | 7.960077975 | -0.240320733 | 0.815238838 | 0.815238838 | -5.604032728 |
| 1435389_at   | 0.023452521  | 7.420050953 | 0.240308511  | 0.815248037 | 0.815248037 | -5.60403555  |
| 1441772_at   | 0.018981906  | 4.953995865 | 0.240284353  | 0.81526622  | 0.81526622  | -5.604041126 |
| 1448973_at   | -0.016935968 | 3.561429871 | -0.240273892 | 0.815274093 | 0.815274093 | -5.60404354  |
| 1416834_x_at | -0.020888092 | 9.964433671 | -0.240228526 | 0.815308237 | 0.815308237 | -5.60405401  |
| 1430378_at   | 0.019915762  | 4.213645587 | 0.240159407  | 0.815360261 | 0.815360261 | -5.604069957 |
| 1422429_at   | 0.023148478  | 9.262579289 | 0.240154687  | 0.815363813 | 0.815363813 | -5.604071046 |
| 1426322_a_at | -0.021103337 | 5.806865189 | -0.240108169 | 0.815398826 | 0.815398826 | -5.604081776 |
| 1425933_a_at | -0.021041158 | 8.335083516 | -0.240059937 | 0.815435129 | 0.815435129 | -5.6040929   |
| 1431550_at   | 0.023888498  | 4.205365888 | 0.240008314  | 0.815473986 | 0.815473986 | -5.604104803 |
| 1417295_at   | -0.030789943 | 8.831844072 | -0.240003153 | 0.81547787  | 0.81547787  | -5.604105993 |
| 1447090_s_at | -0.01958075  | 11.21512391 | -0.239971529 | 0.815501673 | 0.815501673 | -5.604113283 |
| 1453295_at   | -0.041397491 | 4.65196515  | -0.239954014 | 0.815514857 | 0.815514857 | -5.60411732  |
| 1446658_at   | 0.028092387  | 3.389210545 | 0.239946897  | 0.815520214 | 0.815520214 | -5.604118961 |

|              |              |             |              |             |             |              |
|--------------|--------------|-------------|--------------|-------------|-------------|--------------|
| 1422351_at   | -0.017750786 | 3.878401286 | -0.23990539  | 0.815551457 | 0.815551457 | -5.604128527 |
| 1423369_at   | 0.017767393  | 10.28517701 | 0.239903874  | 0.815552598 | 0.815552598 | -5.604128876 |
| 1437033_a_at | -0.019004778 | 9.822059514 | -0.23988338  | 0.815568025 | 0.815568025 | -5.604133599 |
| 1427376_a_at | -0.017715102 | 7.35178719  | -0.239859909 | 0.815585692 | 0.815585692 | -5.604139007 |
| 1419853_a_at | -0.022043483 | 3.613696014 | -0.239849471 | 0.815593548 | 0.815593548 | -5.604141412 |
| 1418752_at   | 0.020104203  | 3.612585521 | 0.239835893  | 0.815603769 | 0.815603769 | -5.60414454  |
| 1418181_at   | -0.02794072  | 8.022554489 | -0.239673373 | 0.815726105 | 0.815726105 | -5.60418197  |
| 1458264_at   | 0.023717793  | 3.846300796 | 0.239667889  | 0.815730233 | 0.815730233 | -5.604183233 |
| 1422712_a_at | 0.015076267  | 11.1369138  | 0.239628725  | 0.815759715 | 0.815759715 | -5.604192249 |
| 1427531_a_at | -0.019162686 | 6.796036625 | -0.239559783 | 0.815811613 | 0.815811613 | -5.604208116 |
| 1419791_at   | -0.018071641 | 3.784020207 | -0.239469646 | 0.815879467 | 0.815879467 | -5.604228855 |
| 1446405_at   | -0.020661193 | 4.082073303 | -0.239460966 | 0.815886002 | 0.815886002 | -5.604230852 |
| 1446731_at   | 0.033864681  | 6.634101422 | 0.239458412  | 0.815887925 | 0.815887925 | -5.604231439 |
| 1423583_at   | 0.016249297  | 7.146696401 | 0.239432772  | 0.815907227 | 0.815907227 | -5.604237337 |
| 1456211_at   | -0.027296781 | 3.426871229 | -0.239428625 | 0.815910349 | 0.815910349 | -5.604238291 |
| 1424814_a_at | 0.026458816  | 6.627557293 | 0.239416407  | 0.815919546 | 0.815919546 | -5.604241101 |
| 1432335_at   | -0.021097224 | 3.696821593 | -0.239415874 | 0.815919948 | 0.815919948 | -5.604241223 |
| 1453779_at   | -0.01910113  | 5.753103301 | -0.239361198 | 0.815961109 | 0.815961109 | -5.604253797 |
| 1416217_a_at | -0.016474518 | 13.99158745 | -0.239348621 | 0.815970577 | 0.815970577 | -5.604256688 |
| 1431064_at   | -0.016478084 | 7.871437531 | -0.239316554 | 0.815994718 | 0.815994718 | -5.604264061 |
| 1419303_at   | -0.020968442 | 5.260521139 | -0.23922625  | 0.816062703 | 0.816062703 | -5.604284817 |
| 1423186_at   | -0.017036398 | 8.251439825 | -0.239223713 | 0.816064613 | 0.816064613 | -5.604285401 |
| 1416855_at   | 0.017673273  | 11.74536102 | 0.239223663  | 0.816064651 | 0.816064651 | -5.604285412 |
| 1455079_at   | 0.020585251  | 7.763304527 | 0.239139724  | 0.816127845 | 0.816127845 | -5.604304698 |
| 1447217_at   | -0.022853639 | 6.813903721 | -0.239102853 | 0.816155604 | 0.816155604 | -5.604313168 |
| 1450797_a_at | 0.016015923  | 4.114053676 | 0.239082721  | 0.816170761 | 0.816170761 | -5.604317792 |
| 1432043_at   | 0.02475189   | 4.232828376 | 0.239070404  | 0.816180034 | 0.816180034 | -5.604320621 |
| 1446253_at   | -0.029177938 | 5.264760366 | -0.239057791 | 0.816189531 | 0.816189531 | -5.604323517 |
| 1422245_a_at | 0.022162035  | 3.888589558 | 0.239057407  | 0.816189819 | 0.816189819 | -5.604323606 |
| 1433824_x_at | -0.026885276 | 9.73606942  | -0.239055773 | 0.81619105  | 0.81619105  | -5.604323981 |
| 1444820_at   | -0.024057427 | 4.607956    | -0.239042739 | 0.816200863 | 0.816200863 | -5.604326974 |
| 1432584_at   | 0.021993426  | 3.566975265 | 0.239037982  | 0.816204444 | 0.816204444 | -5.604328066 |
| 1457674_at   | 0.026025733  | 6.670444973 | 0.239027774  | 0.81621213  | 0.81621213  | -5.60433041  |
| 1428120_at   | 0.018331444  | 7.519239847 | 0.239001332  | 0.816232038 | 0.816232038 | -5.604336482 |
| 1456641_at   | -0.025751656 | 5.769994362 | -0.238996637 | 0.816235572 | 0.816235572 | -5.60433756  |
| 1456668_at   | 0.015126866  | 6.609902768 | 0.238968471  | 0.816256779 | 0.816256779 | -5.604344026 |
| 1426088_at   | 0.01631944   | 12.93075512 | 0.23892782   | 0.816287385 | 0.816287385 | -5.604353357 |
| 1452341_at   | -0.015153028 | 9.885264483 | -0.238916482 | 0.816295922 | 0.816295922 | -5.604355959 |
| 1438964_x_at | 0.017468415  | 7.838567334 | 0.238849596  | 0.816346281 | 0.816346281 | -5.604371309 |
| 1449111_a_at | 0.020368677  | 8.517787073 | 0.238848645  | 0.816346997 | 0.816346997 | -5.604371527 |
| 1447403_a_at | -0.014466552 | 6.927600806 | -0.238845798 | 0.816349141 | 0.816349141 | -5.60437218  |
| 1432351_at   | 0.019896853  | 4.070250834 | 0.238844626  | 0.816350024 | 0.816350024 | -5.604372449 |
| 1439133_at   | 0.019552638  | 3.650623162 | 0.238828751  | 0.816361976 | 0.816361976 | -5.604376091 |
| 1443358_at   | -0.02455127  | 5.241942399 | -0.238777879 | 0.81640028  | 0.81640028  | -5.604387762 |
| 1443350_at   | -0.017030227 | 5.328138622 | -0.238768596 | 0.816407269 | 0.816407269 | -5.604389891 |
| 1439240_x_at | -0.023948661 | 6.719272525 | -0.238768299 | 0.816407493 | 0.816407493 | -5.604389959 |
| 1430239_at   | 0.038496847  | 6.575304808 | 0.238729737  | 0.816436528 | 0.816436528 | -5.604398804 |
| 1451714_a_at | 0.020789108  | 9.329477615 | 0.238568726  | 0.816557764 | 0.816557764 | -5.604435717 |
| 1422486_a_at | -0.024150994 | 10.22295896 | -0.238565804 | 0.816559964 | 0.816559964 | -5.604436387 |
| 1451157_at   | -0.022008231 | 4.588795936 | -0.238525351 | 0.816590425 | 0.816590425 | -5.604445657 |
| 1455274_at   | -0.02536509  | 4.640409969 | -0.238507056 | 0.8166042   | 0.8166042   | -5.604449849 |
| 1432926_at   | -0.01693567  | 4.695909261 | -0.238468338 | 0.816633355 | 0.816633355 | -5.60445872  |
| 1454200_at   | -0.030665546 | 8.452207356 | -0.23843925  | 0.816655258 | 0.816655258 | -5.604465383 |

|              |              |             |              |             |             |              |
|--------------|--------------|-------------|--------------|-------------|-------------|--------------|
| 1441072_at   | -0.036055734 | 7.069055896 | -0.23838174  | 0.816698564 | 0.816698564 | -5.604478555 |
| 1459649_at   | -0.023983649 | 4.965096063 | -0.238346306 | 0.816725246 | 0.816725246 | -5.604486669 |
| 1427960_at   | -0.018080278 | 3.588050297 | -0.238298968 | 0.816760894 | 0.816760894 | -5.604497508 |
| 1419668_at   | 0.016642146  | 8.377547059 | 0.238290475  | 0.816767289 | 0.816767289 | -5.604499452 |
| 1445969_at   | 0.019060517  | 3.986860283 | 0.238270477  | 0.816782348 | 0.816782348 | -5.60450403  |
| 1422348_at   | -0.028049596 | 4.131467334 | -0.238254594 | 0.816794309 | 0.816794309 | -5.604507665 |
| 1456636_at   | -0.025702151 | 4.348046278 | -0.238232257 | 0.81681113  | 0.81681113  | -5.604512778 |
| 1421834_at   | -0.017715681 | 5.91723709  | -0.238223681 | 0.816817588 | 0.816817588 | -5.60451474  |
| 1428655_at   | 0.016493439  | 8.674421263 | 0.238189736  | 0.81684315  | 0.81684315  | -5.604522508 |
| 1450951_at   | 0.021960041  | 5.917331835 | 0.23810639   | 0.816905915 | 0.816905915 | -5.604541577 |
| 1449220_at   | -0.017594961 | 6.157388287 | -0.23809431  | 0.816915012 | 0.816915012 | -5.60454434  |
| 1420629_a_at | -0.016994134 | 7.297553132 | -0.238073761 | 0.816930487 | 0.816930487 | -5.60454904  |
| 1458755_at   | -0.017580982 | 5.208282399 | -0.238073164 | 0.816930937 | 0.816930937 | -5.604549177 |
| 1437268_at   | -0.027840986 | 4.020141834 | -0.238031001 | 0.816962689 | 0.816962689 | -5.604558819 |
| 1416218_x_at | 0.015532916  | 8.816941894 | 0.237995719  | 0.81698926  | 0.81698926  | -5.604566887 |
| 1445306_at   | -0.017342868 | 4.404668779 | -0.237975326 | 0.817004618 | 0.817004618 | -5.604571549 |
| 1418014_a_at | -0.016005645 | 9.270083769 | -0.237952006 | 0.81702218  | 0.81702218  | -5.604576881 |
| 1438633_x_at | -0.037408413 | 9.812341948 | -0.23786867  | 0.817084941 | 0.817084941 | -5.604595928 |
| 1429491_s_at | -0.023999934 | 9.367372539 | -0.237743875 | 0.817178929 | 0.817178929 | -5.604624439 |
| 1436440_at   | -0.022536368 | 5.933092838 | -0.237743573 | 0.817179156 | 0.817179156 | -5.604624508 |
| 1437582_at   | -0.028757367 | 3.303625641 | -0.237682639 | 0.817225049 | 0.817225049 | -5.604638424 |
| 1424733_at   | -0.028892659 | 3.666330836 | -0.237673058 | 0.817232264 | 0.817232264 | -5.604640611 |
| 1458227_at   | 0.020505227  | 3.648751112 | 0.237664057  | 0.817239044 | 0.817239044 | -5.604642667 |
| 1439713_at   | 0.02162264   | 4.722565333 | 0.237642915  | 0.817254967 | 0.817254967 | -5.604647494 |
| 1457563_at   | 0.020811599  | 3.668062871 | 0.237601691  | 0.817286015 | 0.817286015 | -5.604656905 |
| 1437277_x_at | 0.039016378  | 9.161791594 | 0.237521026  | 0.817346771 | 0.817346771 | -5.604675315 |
| 1431408_at   | 0.023186281  | 4.193417505 | 0.237515329  | 0.817351062 | 0.817351062 | -5.604676615 |
| 1422377_at   | 0.023794363  | 6.438148369 | 0.237404627  | 0.817434443 | 0.817434443 | -5.60470187  |
| 1454362_at   | -0.017710308 | 5.501248089 | -0.237378857 | 0.817453853 | 0.817453853 | -5.604707747 |
| 1426638_at   | -0.022337395 | 4.019858418 | -0.23736374  | 0.817465239 | 0.817465239 | -5.604711195 |
| 1447087_at   | -0.023512486 | 5.38655038  | -0.237304992 | 0.817509489 | 0.817509489 | -5.60472459  |
| 1458459_a_at | 0.021297025  | 4.92429785  | 0.237296653  | 0.817515771 | 0.817515771 | -5.604726491 |
| 1449269_at   | -0.025917868 | 3.627867522 | -0.237288532 | 0.817521887 | 0.817521887 | -5.604728343 |
| 1440286_at   | -0.0202439   | 6.949037203 | -0.237276393 | 0.817531031 | 0.817531031 | -5.60473111  |
| 1433561_at   | 0.022479981  | 9.691372724 | 0.237269794  | 0.817536002 | 0.817536002 | -5.604732614 |
| 1422638_s_at | -0.031770376 | 4.864223622 | -0.237267737 | 0.817537551 | 0.817537551 | -5.604733083 |
| 1435639_at   | 0.030156121  | 4.24422681  | 0.23725553   | 0.817546746 | 0.817546746 | -5.604735866 |
| 1436144_at   | 0.026573106  | 3.649555327 | 0.237225663  | 0.817569244 | 0.817569244 | -5.604742673 |
| 1416920_at   | 0.01513775   | 8.238308499 | 0.237202177  | 0.817586934 | 0.817586934 | -5.604748026 |
| 1427677_a_at | 0.019729356  | 9.602466626 | 0.237187996  | 0.817597616 | 0.817597616 | -5.604751258 |
| 1445637_at   | 0.021038228  | 3.546675985 | 0.23717315   | 0.817608799 | 0.817608799 | -5.60475464  |
| 1429354_at   | 0.030791156  | 3.628571628 | 0.237159637  | 0.817618977 | 0.817618977 | -5.604757719 |
| 1442879_at   | -0.015142871 | 3.057108505 | -0.237036948 | 0.817711396 | 0.817711396 | -5.604785667 |
| 1456048_at   | -0.024880652 | 4.289276112 | -0.237035929 | 0.817712163 | 0.817712163 | -5.604785899 |
| 1443108_at   | -0.017681234 | 4.459534825 | -0.23697449  | 0.817758444 | 0.817758444 | -5.604799889 |
| 1452547_s_at | 0.016887825  | 3.887093995 | 0.236974254  | 0.817758622 | 0.817758622 | -5.604799943 |
| 1422634_a_at | -0.01860096  | 5.30909229  | -0.236967221 | 0.817763921 | 0.817763921 | -5.604801544 |
| 1430263_at   | -0.02312781  | 3.855657689 | -0.236888831 | 0.817822972 | 0.817822972 | -5.604819388 |
| 1442515_at   | -0.021607811 | 4.752858011 | -0.236861138 | 0.817843833 | 0.817843833 | -5.60482569  |
| 1455577_at   | 0.037577478  | 4.547160177 | 0.236807337  | 0.817884362 | 0.817884362 | -5.604837932 |
| 1453539_at   | 0.023050106  | 7.06375015  | 0.236806772  | 0.817884788 | 0.817884788 | -5.604838061 |
| 1432606_at   | 0.018488616  | 4.063682984 | 0.236787053  | 0.817899644 | 0.817899644 | -5.604842547 |
| 1453420_at   | -0.016820122 | 7.686444606 | -0.236777133 | 0.817907117 | 0.817907117 | -5.604844804 |

|              |              |             |              |             |             |              |
|--------------|--------------|-------------|--------------|-------------|-------------|--------------|
| 1436951_x_at | 0.022183533  | 10.09287977 | 0.236752318  | 0.81792581  | 0.81792581  | -5.604850448 |
| 1428750_at   | 0.021915443  | 7.399627661 | 0.236740248  | 0.817934903 | 0.817934903 | -5.604853194 |
| 1421564_at   | -0.020628932 | 3.520633836 | -0.23672735  | 0.81794462  | 0.81794462  | -5.604856128 |
| 1427833_at   | 0.01790199   | 4.574869057 | 0.236643517  | 0.818007776 | 0.818007776 | -5.604875191 |
| 1433225_at   | -0.014832363 | 4.020098962 | -0.236615358 | 0.81802899  | 0.81802899  | -5.604881593 |
| 1453665_at   | -0.018715134 | 4.350346271 | -0.23659661  | 0.818043114 | 0.818043114 | -5.604885855 |
| 1447796_at   | 0.02427183   | 5.296220688 | 0.236588291  | 0.818049381 | 0.818049381 | -5.604887746 |
| 1430651_s_at | -0.021692558 | 7.197040912 | -0.236537702 | 0.818087493 | 0.818087493 | -5.604899244 |
| 1431172_at   | -0.024051846 | 3.638753225 | -0.236536406 | 0.81808847  | 0.81808847  | -5.604899539 |
| 1419086_at   | -0.045101868 | 7.018432929 | -0.236522534 | 0.818098921 | 0.818098921 | -5.604902691 |
| 1457186_at   | -0.038529128 | 7.509130335 | -0.23650929  | 0.818108899 | 0.818108899 | -5.604905701 |
| 1427635_at   | 0.019291182  | 3.033471309 | 0.236497005  | 0.818118154 | 0.818118154 | -5.604908492 |
| 1428226_at   | 0.017840877  | 8.830568507 | 0.236456182  | 0.81814891  | 0.81814891  | -5.604917767 |
| 1452782_a_at | -0.018114482 | 8.957407732 | -0.236442743 | 0.818159035 | 0.818159035 | -5.60492082  |
| 1432739_at   | -0.019569348 | 3.332602639 | -0.236435728 | 0.81816432  | 0.81816432  | -5.604922414 |
| 1433074_at   | 0.02383051   | 4.259616486 | 0.236420453  | 0.818175828 | 0.818175828 | -5.604925884 |
| 1445418_at   | 0.029198036  | 4.415642407 | 0.236385666  | 0.818202037 | 0.818202037 | -5.604933785 |
| 1442950_at   | 0.02499219   | 7.091900191 | 0.236335676  | 0.8182397   | 0.8182397   | -5.604945137 |
| 1446499_at   | 0.017227883  | 5.06944601  | 0.236327135  | 0.818246135 | 0.818246135 | -5.604947077 |
| 1442317_at   | 0.017877536  | 6.676227577 | 0.236299678  | 0.818266822 | 0.818266822 | -5.604953311 |
| 1434175_s_at | 0.029887255  | 7.207359651 | 0.236240145  | 0.818311676 | 0.818311676 | -5.604966825 |
| 1442122_at   | -0.016144968 | 7.008522279 | -0.236229795 | 0.818319474 | 0.818319474 | -5.604969174 |
| 1429721_s_at | 0.022377271  | 3.566479501 | 0.236213205  | 0.818331974 | 0.818331974 | -5.60497294  |
| 1431144_at   | -0.019283331 | 6.057420433 | -0.23620296  | 0.818339693 | 0.818339693 | -5.604975265 |
| 1445099_at   | 0.0186728    | 3.863395623 | 0.236115725  | 0.818405421 | 0.818405421 | -5.604995058 |
| 1416407_at   | -0.020072093 | 8.793078345 | -0.236066254 | 0.818442696 | 0.818442696 | -5.60500628  |
| 1458267_at   | -0.015658304 | 4.076808603 | -0.236061754 | 0.818446086 | 0.818446086 | -5.605007301 |
| 1422495_a_at | 0.015842685  | 13.12167964 | 0.23603275   | 0.81846794  | 0.81846794  | -5.605013879 |
| 1440735_at   | 0.016457177  | 3.152800295 | 0.235938374  | 0.818539051 | 0.818539051 | -5.605035277 |
| 1429580_x_at | 0.016589212  | 6.158406717 | 0.235711925  | 0.818709685 | 0.818709685 | -5.605086587 |
| 1416066_at   | 0.024147722  | 10.02450022 | 0.235699499  | 0.818719049 | 0.818719049 | -5.605089402 |
| 1443391_at   | 0.024905303  | 4.310017506 | 0.235613576  | 0.818783796 | 0.818783796 | -5.605108857 |
| 1453478_at   | -0.025628075 | 3.273064496 | -0.235573859 | 0.818813726 | 0.818813726 | -5.605117847 |
| 1424331_at   | 0.01531793   | 9.23336149  | 0.235565403  | 0.818820098 | 0.818820098 | -5.605119761 |
| 1440762_at   | 0.015945266  | 3.329997099 | 0.235543726  | 0.818836433 | 0.818836433 | -5.605124667 |
| 1447931_at   | 0.016693783  | 9.53644228  | 0.23553417   | 0.818843634 | 0.818843634 | -5.60512683  |
| 1458577_at   | 0.020017119  | 5.587766954 | 0.235497301  | 0.818871418 | 0.818871418 | -5.605135173 |
| 1448733_at   | 0.027305892  | 8.679482041 | 0.235493439  | 0.818874329 | 0.818874329 | -5.605136047 |
| 1445942_at   | 0.021652344  | 3.290837607 | 0.235456671  | 0.818902037 | 0.818902037 | -5.605144366 |
| 1445896_at   | 0.024973815  | 4.135751787 | 0.235448222  | 0.818908404 | 0.818908404 | -5.605146277 |
| 1417968_a_at | -0.018869519 | 8.830676428 | -0.235424379 | 0.818926372 | 0.818926372 | -5.605151671 |
| 1434546_at   | -0.020078031 | 7.996872538 | -0.235423687 | 0.818926893 | 0.818926893 | -5.605151828 |
| 1449322_at   | -0.0213398   | 10.23725453 | -0.235395725 | 0.818947965 | 0.818947965 | -5.605158152 |
| 1432374_a_at | 0.033652244  | 6.512603735 | 0.235393977  | 0.818949283 | 0.818949283 | -5.605158548 |
| 1434821_at   | -0.017578541 | 8.288898448 | -0.235372953 | 0.818965126 | 0.818965126 | -5.605163303 |
| 1433295_at   | -0.027189071 | 3.736671348 | -0.235339797 | 0.818990113 | 0.818990113 | -5.6051708   |
| 1421086_at   | -0.032478432 | 4.147637561 | -0.235310497 | 0.819012195 | 0.819012195 | -5.605177426 |
| 1417516_at   | -0.019369505 | 7.589575945 | -0.235272496 | 0.819040833 | 0.819040833 | -5.605186017 |
| 1422063_a_at | -0.019973755 | 7.63676475  | -0.235224582 | 0.819076942 | 0.819076942 | -5.605196847 |
| 1441507_at   | -0.017306358 | 6.34301833  | -0.235216685 | 0.819082894 | 0.819082894 | -5.605198632 |
| 1420091_s_at | 0.026906423  | 8.690928584 | 0.235214308  | 0.819084685 | 0.819084685 | -5.605199169 |
| 1430139_at   | -0.016680852 | 8.101505775 | -0.235214078 | 0.819084858 | 0.819084858 | -5.605199221 |
| 1437042_at   | -0.016604172 | 8.757151464 | -0.235193178 | 0.81910061  | 0.81910061  | -5.605203945 |

|              |              |             |              |             |             |              |
|--------------|--------------|-------------|--------------|-------------|-------------|--------------|
| 1427889_at   | 0.015639734  | 10.0603998  | 0.235176401  | 0.819113254 | 0.819113254 | -5.605207736 |
| 1419445_s_at | 0.015400636  | 10.16372559 | 0.235164031  | 0.819122576 | 0.819122576 | -5.605210531 |
| 1460472_at   | -0.019855841 | 5.90783206  | -0.235158535 | 0.819126719 | 0.819126719 | -5.605211773 |
| 1446844_at   | -0.019657902 | 3.810864385 | -0.235124424 | 0.819152426 | 0.819152426 | -5.60521948  |
| 1425118_at   | -0.017138352 | 6.250200833 | -0.235110915 | 0.819162607 | 0.819162607 | -5.605222532 |
| 1424289_at   | -0.021485849 | 7.335427372 | -0.235081922 | 0.819184458 | 0.819184458 | -5.605229081 |
| 1433573_x_at | -0.019587587 | 6.048605058 | -0.235052195 | 0.819206862 | 0.819206862 | -5.605235795 |
| 1424979_at   | -0.0160603   | 7.712062175 | -0.235019241 | 0.819231699 | 0.819231699 | -5.605243237 |
| 1446107_at   | 0.016067893  | 6.380636941 | 0.235012496  | 0.819236783 | 0.819236783 | -5.605244761 |
| 1456674_at   | -0.018188721 | 7.399736255 | -0.235004132 | 0.819243087 | 0.819243087 | -5.605246649 |
| 1441281_s_at | -0.018238354 | 7.186483326 | -0.234997827 | 0.819247838 | 0.819247838 | -5.605248073 |
| 1422451_at   | -0.016345517 | 9.069719586 | -0.23499222  | 0.819252064 | 0.819252064 | -5.605249339 |
| 1421211_a_at | -0.027546568 | 4.324110767 | -0.234928675 | 0.819299957 | 0.819299957 | -5.605263685 |
| 1425444_a_at | 0.030440742  | 7.486578091 | 0.234893907  | 0.819326162 | 0.819326162 | -5.605271533 |
| 1447007_at   | -0.016155125 | 3.605132941 | -0.234866036 | 0.819347169 | 0.819347169 | -5.605277823 |
| 1446895_at   | 0.026618593  | 3.342711867 | 0.23477075   | 0.819418987 | 0.819418987 | -5.605299323 |
| 1459343_at   | 0.021617414  | 4.523863222 | 0.234651515  | 0.819508859 | 0.819508859 | -5.605326214 |
| 1455359_at   | -0.017972494 | 9.213521846 | -0.234559452 | 0.819578252 | 0.819578252 | -5.605346967 |
| 1429193_at   | 0.017519056  | 8.388006145 | 0.234534667  | 0.819596935 | 0.819596935 | -5.605352553 |
| 1437664_at   | 0.015132662  | 3.627821668 | 0.234506376  | 0.81961826  | 0.81961826  | -5.605358928 |
| 1424716_at   | 0.024730599  | 5.02732461  | 0.234474309  | 0.819642431 | 0.819642431 | -5.605366154 |
| 1449944_a_at | 0.016184854  | 9.998298122 | 0.234423239  | 0.819680927 | 0.819680927 | -5.605377659 |
| 1427189_at   | 0.019714235  | 8.576363203 | 0.234414785  | 0.8196873   | 0.8196873   | -5.605379563 |
| 1420144_x_at | -0.027907322 | 5.699112773 | -0.234381808 | 0.819712158 | 0.819712158 | -5.60538699  |
| 1449730_s_at | -0.017385878 | 5.938166059 | -0.234319426 | 0.819759182 | 0.819759182 | -5.605401038 |
| 1420624_a_at | 0.020946419  | 9.418328181 | 0.234267833  | 0.819798074 | 0.819798074 | -5.605412653 |
| 1417910_at   | 0.01385294   | 10.3719844  | 0.234239152  | 0.819819694 | 0.819819694 | -5.605419109 |
| 1460682_s_at | -0.023623405 | 6.303897456 | -0.234229856 | 0.819826702 | 0.819826702 | -5.605421202 |
| 1421405_at   | -0.020998203 | 5.849652394 | -0.234218913 | 0.819834951 | 0.819834951 | -5.605423665 |
| 1441957_x_at | -0.014912278 | 3.572458102 | -0.23419119  | 0.81985585  | 0.81985585  | -5.605429904 |
| 1416037_a_at | -0.014166166 | 11.86151887 | -0.234138789 | 0.819895352 | 0.819895352 | -5.605441694 |
| 1440907_at   | 0.023503807  | 6.023553965 | 0.23411448   | 0.819913677 | 0.819913677 | -5.605447163 |
| 1442429_at   | -0.025713374 | 6.195757602 | -0.234090105 | 0.819932053 | 0.819932053 | -5.605452647 |
| 1451585_x_at | -0.026901531 | 6.249362861 | -0.233981568 | 0.820013875 | 0.820013875 | -5.605477055 |
| 1446645_at   | -0.017165878 | 5.409719526 | -0.233957625 | 0.820031925 | 0.820031925 | -5.605482438 |
| 1429472_at   | 0.01517444   | 3.582277706 | 0.233903155  | 0.82007299  | 0.82007299  | -5.605494682 |
| 1442359_at   | 0.018164512  | 6.918621713 | 0.233835559  | 0.82012395  | 0.82012395  | -5.605509873 |
| 1451940_x_at | -0.018153128 | 3.163892666 | -0.233803768 | 0.820147918 | 0.820147918 | -5.605517016 |
| 1430077_at   | 0.028575315  | 7.993900747 | 0.233800649  | 0.820150269 | 0.820150269 | -5.605517717 |
| 1448520_at   | 0.019428908  | 6.400269549 | 0.233767749  | 0.820175074 | 0.820175074 | -5.605525108 |
| 1436060_at   | -0.020553811 | 6.675269106 | -0.23372483  | 0.820207431 | 0.820207431 | -5.605534748 |
| 1444961_at   | 0.017272711  | 3.760289022 | 0.233720253  | 0.820210882 | 0.820210882 | -5.605535776 |
| 1421531_at   | -0.015744674 | 3.842148851 | -0.233701488 | 0.820225029 | 0.820225029 | -5.60553999  |
| 1433259_at   | 0.024583638  | 3.441516939 | 0.233662416  | 0.820254487 | 0.820254487 | -5.605548764 |
| 1443295_at   | -0.019737879 | 3.72068765  | -0.233623852 | 0.820283562 | 0.820283562 | -5.605557422 |
| 1418566_s_at | -0.023016676 | 10.62788978 | -0.233614166 | 0.820290865 | 0.820290865 | -5.605559597 |
| 1430434_at   | -0.026577491 | 3.713930974 | -0.233563597 | 0.820328992 | 0.820328992 | -5.605570948 |
| 1423654_a_at | 0.018379385  | 9.30245304  | 0.233554248  | 0.820336041 | 0.820336041 | -5.605573046 |
| 1418656_at   | -0.022807163 | 9.690326352 | -0.233550888 | 0.820338574 | 0.820338574 | -5.6055738   |
| 1460232_s_at | -0.020423894 | 3.653617825 | -0.233513841 | 0.820366506 | 0.820366506 | -5.605582114 |
| 1447069_at   | -0.032240562 | 3.634631025 | -0.23350644  | 0.820372086 | 0.820372086 | -5.605583774 |
| 1446299_at   | -0.024532711 | 7.934452437 | -0.233504178 | 0.820373792 | 0.820373792 | -5.605584282 |
| 1458669_at   | -0.01833695  | 4.064185828 | -0.233490165 | 0.820384357 | 0.820384357 | -5.605587426 |

|              |              |             |              |             |             |              |
|--------------|--------------|-------------|--------------|-------------|-------------|--------------|
| 1437835_a_at | 0.042203192  | 5.133534057 | 0.233452495  | 0.820412759 | 0.820412759 | -5.605595878 |
| 1426742_at   | -0.016825079 | 10.8003189  | -0.233417651 | 0.820439031 | 0.820439031 | -5.605603694 |
| 1454384_at   | 0.016096393  | 5.615004125 | 0.233414375  | 0.820441501 | 0.820441501 | -5.605604428 |
| 1424639_a_at | -0.019432861 | 9.577255055 | -0.233379805 | 0.820467567 | 0.820467567 | -5.605612182 |
| 1447602_x_at | -0.018902782 | 12.5390872  | -0.233378763 | 0.820468353 | 0.820468353 | -5.605612416 |
| 1446574_at   | 0.020230312  | 4.711629546 | 0.233376023  | 0.820470419 | 0.820470419 | -5.60561303  |
| 1441396_at   | 0.045556116  | 4.458939161 | 0.233364281  | 0.820479272 | 0.820479272 | -5.605615663 |
| 1445212_at   | -0.031296793 | 5.815208253 | -0.233353898 | 0.820487101 | 0.820487101 | -5.605617992 |
| 1427439_s_at | -0.01671496  | 9.302026316 | -0.233347342 | 0.820492044 | 0.820492044 | -5.605619462 |
| 1451105_at   | 0.019637253  | 9.3372108   | 0.233306201  | 0.820523065 | 0.820523065 | -5.605628686 |
| 1423467_at   | 0.021076273  | 3.63745875  | 0.233300469  | 0.820527387 | 0.820527387 | -5.605629971 |
| 1437563_at   | -0.024019403 | 7.543250844 | -0.233177629 | 0.820620011 | 0.820620011 | -5.605657504 |
| 1457298_at   | -0.022368855 | 4.192744975 | -0.233173517 | 0.820623112 | 0.820623112 | -5.605658425 |
| 1433282_at   | 0.017618978  | 3.068432516 | 0.233171099  | 0.820624935 | 0.820624935 | -5.605658967 |
| 1433158_at   | 0.023788579  | 4.526754756 | 0.233121845  | 0.820662074 | 0.820662074 | -5.605670002 |
| 1450360_at   | 0.025846399  | 4.867985986 | 0.233081     | 0.820692874 | 0.820692874 | -5.605679152 |
| 1441289_at   | -0.02053579  | 5.212475762 | -0.233036675 | 0.820726298 | 0.820726298 | -5.605689079 |
| 1456806_at   | 0.016470231  | 6.638333166 | 0.232986638  | 0.820764029 | 0.820764029 | -5.605700283 |
| 1443961_at   | -0.021499282 | 4.390874109 | -0.232959912 | 0.820784182 | 0.820784182 | -5.605706266 |
| 1445513_at   | 0.027870967  | 5.300546457 | 0.232958112  | 0.820785539 | 0.820785539 | -5.605706669 |
| 1442202_at   | -0.029793802 | 5.379279534 | -0.232911417 | 0.820820751 | 0.820820751 | -5.605717122 |
| 1432350_at   | 0.015801065  | 5.588077739 | 0.232909562  | 0.82082215  | 0.82082215  | -5.605717537 |
| 1440917_at   | 0.017736507  | 6.165105126 | 0.232897957  | 0.820830901 | 0.820830901 | -5.605720134 |
| 1456456_x_at | -0.015203992 | 3.651676022 | -0.232896393 | 0.820832081 | 0.820832081 | -5.605720484 |
| 1435057_x_at | -0.016339853 | 6.828625543 | -0.232869956 | 0.820852016 | 0.820852016 | -5.605726401 |
| 1430368_s_at | 0.015932663  | 4.342732552 | 0.232861351  | 0.820858506 | 0.820858506 | -5.605728326 |
| 1436739_at   | 0.033742198  | 6.776514623 | 0.232792587  | 0.820910361 | 0.820910361 | -5.605743712 |
| 1451452_a_at | 0.020247664  | 5.718074872 | 0.232763106  | 0.820932593 | 0.820932593 | -5.605750306 |
| 1425097_a_at | -0.023735688 | 6.534020575 | -0.232678326 | 0.820996527 | 0.820996527 | -5.605769267 |
| 1415741_at   | 0.015482343  | 11.0508705  | 0.232672103  | 0.82100122  | 0.82100122  | -5.605770658 |
| 1425599_a_at | -0.027184898 | 7.794707704 | -0.232653029 | 0.821015605 | 0.821015605 | -5.605774923 |
| 1425476_at   | 0.021907018  | 8.631905805 | 0.232624728  | 0.821036947 | 0.821036947 | -5.60578125  |
| 1434318_a_at | -0.02185914  | 8.189931268 | -0.232576418 | 0.82107338  | 0.82107338  | -5.605792048 |
| 1436059_at   | 0.029322311  | 8.055499988 | 0.232539153  | 0.821101484 | 0.821101484 | -5.605800377 |
| 1445530_at   | -0.015652461 | 3.240563322 | -0.232491449 | 0.821137461 | 0.821137461 | -5.605811036 |
| 1431520_at   | 0.019662746  | 5.094313198 | 0.23248094   | 0.821145386 | 0.821145386 | -5.605813384 |
| 1454819_at   | -0.017742096 | 9.082689438 | -0.232471492 | 0.821152511 | 0.821152511 | -5.605815495 |
| 1421199_at   | -0.028697146 | 4.290316502 | -0.232431174 | 0.821182919 | 0.821182919 | -5.605824501 |
| 1433217_at   | 0.01605273   | 3.507621849 | 0.232401525  | 0.821205279 | 0.821205279 | -5.605831123 |
| 1438458_a_at | 0.025940195  | 10.50042231 | 0.232394666  | 0.821210452 | 0.821210452 | -5.605832655 |
| 1420719_at   | 0.028529068  | 7.157209111 | 0.232390074  | 0.821213915 | 0.821213915 | -5.605833681 |
| 1420952_at   | 0.017011637  | 11.67369036 | 0.23238504   | 0.821217712 | 0.821217712 | -5.605834805 |
| 1447499_s_at | -0.01546588  | 3.6953579   | -0.232364266 | 0.821233379 | 0.821233379 | -5.605839444 |
| 1454921_at   | -0.015325488 | 7.973036293 | -0.232360457 | 0.821236252 | 0.821236252 | -5.605840295 |
| 1436375_at   | -0.016068209 | 8.1129446   | -0.232288553 | 0.821290483 | 0.821290483 | -5.605856348 |
| 1445779_at   | 0.029262098  | 5.225094666 | 0.232276933  | 0.821299246 | 0.821299246 | -5.605858942 |
| 1431279_s_at | -0.022029082 | 7.923511508 | -0.232263339 | 0.821309499 | 0.821309499 | -5.605861976 |
| 1460403_at   | 0.026507157  | 9.217066247 | 0.232256604  | 0.821314578 | 0.821314578 | -5.60586348  |
| 1451249_at   | -0.019626371 | 8.180180317 | -0.232243453 | 0.821324497 | 0.821324497 | -5.605866415 |
| 1436201_x_at | 0.028966211  | 5.192036828 | 0.232234906  | 0.821330943 | 0.821330943 | -5.605868322 |
| 1428347_at   | 0.025332777  | 5.880555198 | 0.232228015  | 0.82133614  | 0.82133614  | -5.60586986  |
| 1454825_at   | 0.021110532  | 7.331790357 | 0.232205485  | 0.821353133 | 0.821353133 | -5.605874888 |
| 1426622_a_at | 0.023509614  | 6.509443474 | 0.232153643  | 0.821392234 | 0.821392234 | -5.605886456 |

|              |              |             |              |             |             |              |
|--------------|--------------|-------------|--------------|-------------|-------------|--------------|
| 1439958_at   | -0.015758012 | 4.182422152 | -0.232141905 | 0.821401087 | 0.821401087 | -5.605889074 |
| 1422651_at   | -0.026511824 | 3.457093097 | -0.232120128 | 0.821417512 | 0.821417512 | -5.605893932 |
| 1416872_at   | -0.013851797 | 10.11320684 | -0.232077772 | 0.821449459 | 0.821449459 | -5.60590338  |
| 1443608_at   | 0.019209665  | 3.486225471 | 0.231978626  | 0.82152424  | 0.82152424  | -5.605925488 |
| 1430452_at   | -0.017511989 | 6.697068013 | -0.231953488 | 0.821543202 | 0.821543202 | -5.605931092 |
| 1435408_at   | 0.023549397  | 3.324027901 | 0.231939139  | 0.821554024 | 0.821554024 | -5.60593429  |
| 1420988_at   | 0.029923185  | 4.1318731   | 0.231897035  | 0.821585783 | 0.821585783 | -5.605943674 |
| 1417452_a_at | 0.014464802  | 12.74180777 | 0.231868006  | 0.821607679 | 0.821607679 | -5.605950143 |
| 1415771_at   | 0.016294643  | 12.27106837 | 0.231835239  | 0.821632394 | 0.821632394 | -5.605957444 |
| 1448819_at   | -0.022330868 | 9.368180721 | -0.231790916 | 0.821665827 | 0.821665827 | -5.605967319 |
| 1421894_a_at | -0.017617409 | 9.27765946  | -0.231747552 | 0.821698537 | 0.821698537 | -5.605976978 |
| 1459545_at   | -0.01839603  | 4.778321996 | -0.231733192 | 0.821709369 | 0.821709369 | -5.605980176 |
| 1429096_at   | -0.021003639 | 8.183702223 | -0.231702415 | 0.821732585 | 0.821732585 | -5.605987029 |
| 1431593_a_at | 0.016244578  | 10.2859872  | 0.231641812  | 0.821778299 | 0.821778299 | -5.606000522 |
| 1420043_s_at | 0.027487723  | 4.240856801 | 0.231622818  | 0.821792627 | 0.821792627 | -5.606004751 |
| 1453331_at   | -0.015265527 | 3.175398604 | -0.231609153 | 0.821802935 | 0.821802935 | -5.606007792 |
| 1420054_s_at | 0.015774524  | 5.115747093 | 0.231548117  | 0.821848977 | 0.821848977 | -5.606021376 |
| 1432118_at   | -0.018600801 | 3.897266421 | -0.231505497 | 0.821881128 | 0.821881128 | -5.60603086  |
| 1416227_at   | -0.020657803 | 6.157514142 | -0.23149223  | 0.821891136 | 0.821891136 | -5.606033811 |
| 1445686_at   | 0.016705386  | 3.336565629 | 0.231462095  | 0.821913869 | 0.821913869 | -5.606040515 |
| 1445639_at   | -0.03726262  | 3.606824162 | -0.231453145 | 0.82192062  | 0.82192062  | -5.606042506 |
| 1418511_at   | 0.078486165  | 6.272160447 | 0.231393708  | 0.821965458 | 0.821965458 | -5.606055725 |
| 1454192_at   | 0.014984807  | 3.260936515 | 0.231357932  | 0.821992447 | 0.821992447 | -5.606063681 |
| 1432573_at   | -0.023323235 | 4.12861861  | -0.231321002 | 0.822020306 | 0.822020306 | -5.606071891 |
| 1447623_s_at | -0.024419825 | 8.748877087 | -0.231302313 | 0.822034405 | 0.822034405 | -5.606076046 |
| 1433622_at   | -0.016787733 | 8.822960555 | -0.231139279 | 0.8221574   | 0.8221574   | -5.606112275 |
| 1458282_at   | -0.024812525 | 8.041529125 | -0.23105222  | 0.82222308  | 0.82222308  | -5.606131611 |
| 1459194_at   | -0.023536216 | 4.478009788 | -0.231022343 | 0.822245621 | 0.822245621 | -5.606138245 |
| 1425470_at   | 0.022055241  | 3.303690648 | 0.230954662  | 0.822296683 | 0.822296683 | -5.60615327  |
| 1459716_at   | -0.044128175 | 5.485714806 | -0.230917644 | 0.822324612 | 0.822324612 | -5.606161486 |
| 1440633_at   | 0.021447952  | 6.4971142   | 0.230914124  | 0.822327268 | 0.822327268 | -5.606162267 |
| 1421404_at   | -0.017689325 | 4.273152557 | -0.230895379 | 0.822341411 | 0.822341411 | -5.606166427 |
| 1432595_at   | 0.029979968  | 3.396004873 | 0.230787141  | 0.822423075 | 0.822423075 | -5.606190441 |
| 1446157_at   | -0.014962835 | 3.170489807 | -0.230782022 | 0.822426937 | 0.822426937 | -5.606191576 |
| 1423165_a_at | -0.018779149 | 9.431759134 | -0.230761705 | 0.822442266 | 0.822442266 | -5.606196082 |
| 1442736_at   | -0.031714069 | 4.570809008 | -0.230745295 | 0.822454647 | 0.822454647 | -5.606199721 |
| 1437627_at   | -0.030539107 | 8.256938447 | -0.230738789 | 0.822459556 | 0.822459556 | -5.606201164 |
| 1425537_at   | 0.018019795  | 8.20339415  | 0.230736832  | 0.822461033 | 0.822461033 | -5.606201598 |
| 1430813_at   | -0.019677018 | 4.774919233 | -0.23072165  | 0.822472488 | 0.822472488 | -5.606204965 |
| 1424784_at   | -0.058539211 | 5.837028539 | -0.230702129 | 0.822487217 | 0.822487217 | -5.606209293 |
| 1428079_at   | -0.026362718 | 3.923273434 | -0.230689091 | 0.822497054 | 0.822497054 | -5.606212184 |
| 1426685_a_at | -0.014545875 | 10.27229763 | -0.230632827 | 0.822539506 | 0.822539506 | -5.606224657 |
| 1423780_at   | -0.015723135 | 8.674892703 | -0.230624438 | 0.822545835 | 0.822545835 | -5.606226516 |
| 1419482_at   | 0.02929544   | 6.401104387 | 0.230550238  | 0.822601822 | 0.822601822 | -5.606242961 |
| 1418594_a_at | -0.018747984 | 8.171870946 | -0.230526916 | 0.82261942  | 0.82261942  | -5.606248128 |
| 1424597_at   | 0.019179282  | 7.99684262  | 0.230455033  | 0.822673659 | 0.822673659 | -5.606264052 |
| 1454216_at   | -0.021951056 | 4.104695997 | -0.230386112 | 0.822725665 | 0.822725665 | -5.606279315 |
| 1421201_a_at | -0.018281895 | 8.928826242 | -0.23037069  | 0.822737302 | 0.822737302 | -5.60628273  |
| 1459210_at   | 0.019642836  | 4.311686548 | 0.230351548  | 0.822751745 | 0.822751745 | -5.606286968 |
| 1452996_a_at | 0.01734805   | 7.162208165 | 0.230351378  | 0.822751874 | 0.822751874 | -5.606287006 |
| 1430058_at   | 0.019460221  | 7.685376626 | 0.230316134  | 0.822778469 | 0.822778469 | -5.606294808 |
| 1441983_at   | -0.018356958 | 3.223046241 | -0.230296308 | 0.822793429 | 0.822793429 | -5.606299196 |
| 1450004_at   | 0.019117648  | 3.850294006 | 0.230269829  | 0.82281341  | 0.82281341  | -5.606305057 |

|              |              |             |              |             |             |              |
|--------------|--------------|-------------|--------------|-------------|-------------|--------------|
| 1453932_at   | -0.02453558  | 4.257110058 | -0.230245096 | 0.822832073 | 0.822832073 | -5.60631053  |
| 1422879_at   | -0.020760591 | 9.304430015 | -0.230223842 | 0.822848112 | 0.822848112 | -5.606315234 |
| 1454541_at   | 0.017918226  | 3.800959162 | 0.230190215  | 0.822873487 | 0.822873487 | -5.606322674 |
| 1415815_at   | 0.018588746  | 3.98060702  | 0.230159718  | 0.8228965   | 0.8228965   | -5.60632942  |
| 1442648_at   | 0.017254487  | 6.988362632 | 0.230130139  | 0.822918821 | 0.822918821 | -5.606335963 |
| 1441280_at   | -0.018274875 | 4.397884433 | -0.230111647 | 0.822932776 | 0.822932776 | -5.606340053 |
| 1438371_x_at | 0.030039971  | 10.83921796 | 0.230110753  | 0.82293345  | 0.82293345  | -5.606340251 |
| 1422987_at   | -0.02581831  | 4.32782691  | -0.230096256 | 0.82294439  | 0.82294439  | -5.606343457 |
| 1452868_at   | -0.018357115 | 8.040660177 | -0.230056268 | 0.822974566 | 0.822974566 | -5.606352299 |
| 1446945_at   | -0.015331129 | 4.349000431 | -0.230007063 | 0.823011698 | 0.823011698 | -5.606363178 |
| 1451990_at   | 0.01453594   | 7.105256198 | 0.230006657  | 0.823012005 | 0.823012005 | -5.606363268 |
| 1451737_at   | -0.019528908 | 6.918915868 | -0.229982966 | 0.823029883 | 0.823029883 | -5.606368505 |
| 1423208_at   | 0.018211165  | 9.366288701 | 0.229948684  | 0.823055754 | 0.823055754 | -5.606376082 |
| 1417331_a_at | 0.014963523  | 8.694108777 | 0.229915126  | 0.823081079 | 0.823081079 | -5.606383498 |
| 1453877_at   | -0.018333912 | 3.378481334 | -0.229845291 | 0.823133781 | 0.823133781 | -5.606398928 |
| 1422667_at   | 0.034539713  | 10.92166687 | 0.229833241  | 0.823142875 | 0.823142875 | -5.60640159  |
| 1457522_at   | -0.017598324 | 7.722594908 | -0.229806078 | 0.823163374 | 0.823163374 | -5.60640759  |
| 1448026_at   | 0.039005268  | 5.864831343 | 0.22980163   | 0.823166731 | 0.823166731 | -5.606408572 |
| 1444113_at   | 0.027461889  | 6.4545917   | 0.229792531  | 0.823173598 | 0.823173598 | -5.606410582 |
| 1431530_a_at | 0.021925204  | 5.874004899 | 0.229653041  | 0.823278871 | 0.823278871 | -5.606441381 |
| 1435103_x_at | 0.023323617  | 9.947664622 | 0.229589127  | 0.823327108 | 0.823327108 | -5.606455487 |
| 1426091_a_at | 0.022065526  | 6.303633924 | 0.229587841  | 0.823328079 | 0.823328079 | -5.606455771 |
| 1428408_a_at | 0.01898861   | 8.746027648 | 0.229578107  | 0.823335425 | 0.823335425 | -5.606457919 |
| 1453944_at   | -0.020593892 | 3.747031695 | -0.229521352 | 0.82337826  | 0.82337826  | -5.606470441 |
| 1458476_at   | -0.02316204  | 5.047509295 | -0.229505338 | 0.823390346 | 0.823390346 | -5.606473973 |
| 1441552_at   | -0.021107719 | 3.480379891 | -0.229457379 | 0.823426543 | 0.823426543 | -5.606484552 |
| 1424750_at   | 0.018504764  | 7.806081113 | 0.229418047  | 0.823456229 | 0.823456229 | -5.606493225 |
| 1433001_at   | -0.020691761 | 4.286874785 | -0.229407232 | 0.823464392 | 0.823464392 | -5.60649561  |
| 1443972_at   | -0.021241645 | 3.904368379 | -0.229406949 | 0.823464606 | 0.823464606 | -5.606495672 |
| 1447674_at   | -0.018241552 | 4.659491253 | -0.229225869 | 0.823601281 | 0.823601281 | -5.606535584 |
| 1442764_at   | -0.022747583 | 5.780329868 | -0.229202979 | 0.823618558 | 0.823618558 | -5.606540627 |
| 1415773_at   | 0.021296181  | 10.84732631 | 0.229191868  | 0.823626944 | 0.823626944 | -5.606543075 |
| 1425371_at   | -0.014482728 | 8.362157385 | -0.229159571 | 0.823651322 | 0.823651322 | -5.606550189 |
| 1459880_at   | -0.020705948 | 5.607101228 | -0.229090898 | 0.823703157 | 0.823703157 | -5.606565313 |
| 1435903_at   | 0.019589741  | 4.808961235 | 0.229071537  | 0.823717771 | 0.823717771 | -5.606569576 |
| 1419961_s_at | -0.018327814 | 3.375969577 | -0.229063754 | 0.823723646 | 0.823723646 | -5.60657129  |
| 1448605_at   | -0.0156754   | 8.423867513 | -0.229059997 | 0.823726482 | 0.823726482 | -5.606572117 |
| 1449025_at   | -0.015577406 | 4.428281854 | -0.229048756 | 0.823734967 | 0.823734967 | -5.606574592 |
| 1425723_at   | 0.018862057  | 3.627003165 | 0.229033171  | 0.823746731 | 0.823746731 | -5.606578023 |
| 1427215_at   | -0.022257647 | 3.321970983 | -0.228975294 | 0.823790418 | 0.823790418 | -5.606590762 |
| 1431736_at   | 0.027111799  | 3.762969136 | 0.2289729    | 0.823792225 | 0.823792225 | -5.606591289 |
| 1442109_at   | 0.035105969  | 8.809091023 | 0.228937828  | 0.8238187   | 0.8238187   | -5.606599008 |
| 1419277_at   | 0.024835445  | 7.156438334 | 0.228931595  | 0.823823404 | 0.823823404 | -5.606600379 |
| 1428110_x_at | -0.018579865 | 7.439858034 | -0.228931562 | 0.823823429 | 0.823823429 | -5.606600386 |
| 1417427_at   | -0.017011861 | 9.451221396 | -0.228927169 | 0.823826746 | 0.823826746 | -5.606601353 |
| 1460672_at   | -0.018614094 | 9.779967293 | -0.228873927 | 0.823866936 | 0.823866936 | -5.606613067 |
| 1422168_a_at | -0.033490148 | 5.000920327 | -0.228764365 | 0.823949641 | 0.823949641 | -5.606637164 |
| 1431807_at   | -0.022536799 | 4.54142453  | -0.228736249 | 0.823970865 | 0.823970865 | -5.606643346 |
| 1455655_a_at | -0.01690854  | 11.12960845 | -0.228728289 | 0.823976874 | 0.823976874 | -5.606645096 |
| 1432978_at   | 0.017943538  | 6.363945883 | 0.228726472  | 0.823978246 | 0.823978246 | -5.606645496 |
| 1422819_at   | -0.018259696 | 8.321131407 | -0.228694662 | 0.824002259 | 0.824002259 | -5.606652489 |
| 1418717_at   | 0.020566053  | 5.659262417 | 0.228669493  | 0.824021259 | 0.824021259 | -5.606658021 |
| 1455897_x_at | 0.01761338   | 12.76681083 | 0.228603593  | 0.824071007 | 0.824071007 | -5.606672503 |



|                  |              |             |              |             |             |              |
|------------------|--------------|-------------|--------------|-------------|-------------|--------------|
| 1416231_at       | 0.030126256  | 6.027559488 | 0.228599947  | 0.824073759 | 0.824073759 | -5.606673304 |
| 1449461_at       | 0.015654026  | 3.72315976  | 0.228586424  | 0.824083968 | 0.824083968 | -5.606676276 |
| 1440692_at       | -0.015926647 | 3.364985482 | -0.228578268 | 0.824090126 | 0.824090126 | -5.606678068 |
| 1440428_at       | 0.022353653  | 4.229677493 | 0.228553667  | 0.824108697 | 0.824108697 | -5.606683473 |
| 1428553_at       | 0.016250975  | 10.60848278 | 0.228545806  | 0.824114632 | 0.824114632 | -5.6066852   |
| 1428681_at       | -0.019484428 | 8.580264252 | -0.22850293  | 0.824147    | 0.824147    | -5.606694618 |
| 1429916_at       | -0.029280219 | 4.778990436 | -0.22848551  | 0.824160151 | 0.824160151 | -5.606698444 |
| 1448693_at       | -0.018573466 | 7.461062005 | -0.228458886 | 0.82418025  | 0.82418025  | -5.60670429  |
| 1456546_at       | -0.025358908 | 4.347366979 | -0.22843781  | 0.824196161 | 0.824196161 | -5.606708919 |
| 1445648_at       | -0.014065472 | 3.568242459 | -0.228410468 | 0.824216803 | 0.824216803 | -5.606714922 |
| AFFX-GapdhMur/M3 | -0.015019568 | 12.90640991 | -0.228404121 | 0.824221595 | 0.824221595 | -5.606716315 |
| 1457829_at       | -0.024715941 | 4.851453239 | -0.228382125 | 0.824238201 | 0.824238201 | -5.606721144 |
| 1451450_at       | 0.016849375  | 8.056432939 | 0.228343784  | 0.824267146 | 0.824267146 | -5.60672956  |
| 1443721_x_at     | -0.029385435 | 5.260817954 | -0.22833486  | 0.824273884 | 0.824273884 | -5.606731519 |
| 1447574_s_at     | -0.019942019 | 5.411774569 | -0.228259919 | 0.824330462 | 0.824330462 | -5.606747964 |
| 1445078_at       | -0.017187715 | 4.518451693 | -0.228232809 | 0.824350929 | 0.824350929 | -5.606753912 |
| 1449308_at       | -0.019656669 | 5.397173469 | -0.228227545 | 0.824354904 | 0.824354904 | -5.606755067 |
| 1442987_at       | 0.017674371  | 3.531756925 | 0.228220775  | 0.824360015 | 0.824360015 | -5.606756552 |
| 1444295_at       | 0.025391007  | 7.828200042 | 0.228182863  | 0.824388638 | 0.824388638 | -5.606764868 |
| 1432577_at       | 0.01875478   | 4.594783127 | 0.228149061  | 0.824414159 | 0.824414159 | -5.606772282 |
| 1445406_at       | -0.027899732 | 4.958974463 | -0.228133163 | 0.824426161 | 0.824426161 | -5.606775768 |
| 1420209_at       | 0.015711279  | 5.471933216 | 0.228126362  | 0.824431296 | 0.824431296 | -5.606777259 |
| 1415898_at       | -0.023423865 | 3.62141376  | -0.228112898 | 0.824441461 | 0.824441461 | -5.606780212 |
| 1455629_at       | -0.017443555 | 4.424993871 | -0.228078131 | 0.824467711 | 0.824467711 | -5.606787834 |
| 1433286_at       | 0.024296681  | 3.69302868  | 0.22807199   | 0.824472347 | 0.824472347 | -5.606789181 |
| 1438307_at       | 0.029000432  | 5.708478305 | 0.228040057  | 0.824496457 | 0.824496457 | -5.606796181 |
| 1438689_at       | -0.023369698 | 5.726486095 | -0.228016613 | 0.824514158 | 0.824514158 | -5.606801319 |
| 1442163_at       | -0.021870947 | 6.824734389 | -0.228011808 | 0.824517786 | 0.824517786 | -5.606802372 |
| 1417514_at       | -0.021118518 | 7.540920901 | -0.227944285 | 0.824568768 | 0.824568768 | -5.60681717  |
| 1422615_at       | -0.0267783   | 8.000249401 | -0.227876138 | 0.824620222 | 0.824620222 | -5.606832099 |
| 1433119_at       | 0.019889461  | 4.545454653 | 0.227839698  | 0.824647736 | 0.824647736 | -5.60684008  |
| 1424226_at       | 0.029301799  | 5.780676744 | 0.227808073  | 0.824671615 | 0.824671615 | -5.606847006 |
| 1428997_at       | 0.018078874  | 10.01664468 | 0.227755763  | 0.824711112 | 0.824711112 | -5.60685846  |
| 1443011_at       | -0.022583889 | 3.413710065 | -0.227754956 | 0.824711722 | 0.824711722 | -5.606858636 |
| 1449698_at       | 0.015360636  | 4.837564115 | 0.227746428  | 0.824718161 | 0.824718161 | -5.606860503 |
| 1448366_at       | -0.021544183 | 6.476745562 | -0.227738356 | 0.824724256 | 0.824724256 | -5.60686227  |
| 1430945_at       | 0.030107065  | 5.070747328 | 0.227721569  | 0.824736931 | 0.824736931 | -5.606865945 |
| 1417801_a_at     | 0.026267666  | 8.397626657 | 0.227705335  | 0.82474919  | 0.82474919  | -5.606869499 |
| 1432090_at       | -0.021226015 | 3.8289504   | -0.227595222 | 0.824832335 | 0.824832335 | -5.606893594 |
| 1453959_at       | -0.02027255  | 4.817858118 | -0.227429842 | 0.824957217 | 0.824957217 | -5.606929763 |
| 1453124_at       | -0.028975324 | 8.297490223 | -0.227408501 | 0.824973332 | 0.824973332 | -5.606934428 |
| 1448788_at       | -0.02942181  | 8.380861393 | -0.227391318 | 0.824986307 | 0.824986307 | -5.606938184 |
| 1441837_at       | -0.024498529 | 3.89183914  | -0.227382787 | 0.82499275  | 0.82499275  | -5.606940049 |
| 1415755_a_at     | -0.022366646 | 10.14724005 | -0.227375169 | 0.824998502 | 0.824998502 | -5.606941714 |
| 1438873_at       | 0.017976711  | 3.417467115 | 0.22736728   | 0.82500446  | 0.82500446  | -5.606943438 |
| 1420244_at       | -0.022529212 | 3.21449316  | -0.227348535 | 0.825018614 | 0.825018614 | -5.606947535 |
| 1420809_a_at     | 0.036607338  | 7.703671518 | 0.227333698  | 0.825029819 | 0.825029819 | -5.606950777 |
| 1440478_at       | -0.023409527 | 5.377336524 | -0.227325918 | 0.825035694 | 0.825035694 | -5.606952477 |
| 1427892_at       | 0.024943544  | 5.13433444  | 0.227300327  | 0.825055019 | 0.825055019 | -5.606958069 |
| 1453459_at       | -0.015918244 | 4.183554083 | -0.227296038 | 0.825058258 | 0.825058258 | -5.606959006 |
| 1422766_at       | 0.015243768  | 9.163959409 | 0.227284501  | 0.82506697  | 0.82506697  | -5.606961527 |
| 1416094_at       | -0.016865678 | 9.094335249 | -0.227260647 | 0.825084984 | 0.825084984 | -5.606966738 |
| 1428562_at       | 0.022876118  | 7.403378299 | 0.227247621  | 0.825094821 | 0.825094821 | -5.606969584 |

|              |              |             |              |             |             |              |
|--------------|--------------|-------------|--------------|-------------|-------------|--------------|
| 1456852_at   | 0.020768181  | 5.760159505 | 0.227201254  | 0.825129836 | 0.825129836 | -5.606979712 |
| 1415706_at   | 0.016602815  | 11.66839912 | 0.227186837  | 0.825140724 | 0.825140724 | -5.606982861 |
| 1421491_a_at | 0.020940436  | 8.754771723 | 0.227175373  | 0.825149381 | 0.825149381 | -5.606985364 |
| 1456392_at   | -0.028376416 | 7.469376491 | -0.227171327 | 0.825152437 | 0.825152437 | -5.606986248 |
| 1435592_at   | 0.022673217  | 6.721253621 | 0.22717067   | 0.825152933 | 0.825152933 | -5.606986391 |
| 1423649_at   | 0.013599085  | 8.561019829 | 0.22716843   | 0.825154624 | 0.825154624 | -5.60698688  |
| 1444829_at   | 0.017079711  | 3.429571638 | 0.227168055  | 0.825154907 | 0.825154907 | -5.606986962 |
| 1422834_at   | 0.021958252  | 3.794151309 | 0.227133119  | 0.82518129  | 0.82518129  | -5.60699459  |
| 1446587_at   | -0.017210293 | 3.490545525 | -0.227111046 | 0.825197959 | 0.825197959 | -5.60699941  |
| 1456367_at   | 0.0250045    | 5.613727927 | 0.227110985  | 0.825198006 | 0.825198006 | -5.606999423 |
| 1424180_a_at | -0.018348087 | 8.484170285 | -0.227097202 | 0.825208415 | 0.825208415 | -5.607002432 |
| 1437956_at   | 0.026239093  | 4.496441575 | 0.227036301  | 0.825254408 | 0.825254408 | -5.607015725 |
| 1418284_at   | -0.017917188 | 9.251247209 | -0.226997247 | 0.825283901 | 0.825283901 | -5.607024248 |
| 1460480_at   | 0.015141284  | 3.917894807 | 0.226990771  | 0.825288792 | 0.825288792 | -5.607025661 |
| 1446086_s_at | 0.019761014  | 7.976699659 | 0.226932794  | 0.825332578 | 0.825332578 | -5.60703831  |
| 1452000_s_at | 0.01514739   | 8.807962115 | 0.226925119  | 0.825338374 | 0.825338374 | -5.607039984 |
| 1448774_at   | 0.014077975  | 9.455155232 | 0.226924779  | 0.825338631 | 0.825338631 | -5.607040059 |
| 1425898_x_at | -0.030455324 | 3.447939314 | -0.226907655 | 0.825351563 | 0.825351563 | -5.607043794 |
| 1443377_at   | -0.019795487 | 5.387788947 | -0.226833015 | 0.825407935 | 0.825407935 | -5.607060072 |
| 1456602_at   | -0.019933383 | 7.849023187 | -0.226791075 | 0.82543961  | 0.82543961  | -5.607069216 |
| 1435572_at   | 0.017382569  | 6.005613987 | 0.226754731  | 0.825467059 | 0.825467059 | -5.607077139 |
| 1434133_s_at | -0.027143782 | 6.504185142 | -0.226673598 | 0.825528336 | 0.825528336 | -5.607094821 |
| 1457086_at   | 0.016397255  | 4.125672737 | 0.226594756  | 0.825587884 | 0.825587884 | -5.607111998 |
| 1439824_at   | 0.020703719  | 8.441124886 | 0.226585483  | 0.825594888 | 0.825594888 | -5.607114018 |
| 1454235_a_at | 0.023562471  | 5.699790464 | 0.226577488  | 0.825600927 | 0.825600927 | -5.607115759 |
| 1432439_at   | 0.029723918  | 4.794816803 | 0.226545538  | 0.825625059 | 0.825625059 | -5.607122718 |
| 1450998_at   | 0.022156111  | 7.367538173 | 0.226525881  | 0.825639906 | 0.825639906 | -5.607126999 |
| 1448478_at   | 0.013862166  | 8.757173244 | 0.226493512  | 0.825664354 | 0.825664354 | -5.607134047 |
| 1456793_at   | -0.043550461 | 5.4792522   | -0.226461809 | 0.825688299 | 0.825688299 | -5.607140949 |
| 1437974_a_at | -0.021821852 | 8.545296504 | -0.226452344 | 0.825695448 | 0.825695448 | -5.60714301  |
| 1441198_at   | 0.025501762  | 6.462348972 | 0.226440343  | 0.825704513 | 0.825704513 | -5.607145622 |
| 1416921_x_at | -0.022042195 | 11.15471871 | -0.226383886 | 0.825747157 | 0.825747157 | -5.60715791  |
| 1427825_at   | -0.020466203 | 3.759686409 | -0.226345897 | 0.825775851 | 0.825775851 | -5.607166177 |
| 1430019_a_at | -0.017107379 | 10.91243449 | -0.22632645  | 0.825790541 | 0.825790541 | -5.607170408 |
| 1441262_at   | 0.022398739  | 6.643290438 | 0.226311272  | 0.825802005 | 0.825802005 | -5.607173711 |
| 1417664_a_at | 0.0151963    | 8.020017868 | 0.226304626  | 0.825807025 | 0.825807025 | -5.607175156 |
| 1438922_x_at | -0.02824589  | 8.046383695 | -0.226286014 | 0.825821083 | 0.825821083 | -5.607179205 |
| 1424896_at   | -0.028642171 | 5.998361652 | -0.226274658 | 0.825829661 | 0.825829661 | -5.607181675 |
| 1441880_x_at | 0.018610226  | 6.256617128 | 0.226257948  | 0.825842284 | 0.825842284 | -5.60718531  |
| 1457506_at   | -0.013809104 | 5.678764901 | -0.226240456 | 0.825855496 | 0.825855496 | -5.607189115 |
| 1424628_a_at | 0.015000665  | 10.72528919 | 0.226222487  | 0.825869069 | 0.825869069 | -5.607193023 |
| 1452985_at   | -0.018094055 | 8.0135605   | -0.22622212  | 0.825869346 | 0.825869346 | -5.607193102 |
| 1448731_at   | 0.014631503  | 4.124953849 | 0.226220041  | 0.825870917 | 0.825870917 | -5.607193554 |
| 1451382_at   | -0.014971673 | 5.796937019 | -0.2261981   | 0.82588749  | 0.82588749  | -5.607198326 |
| 1430123_a_at | 0.01776017   | 13.25735711 | 0.226169786  | 0.825908877 | 0.825908877 | -5.607204482 |
| 1460093_at   | -0.021236384 | 3.368888323 | -0.226039526 | 0.826007274 | 0.826007274 | -5.607232796 |
| 1420614_at   | -0.024920124 | 9.396420167 | -0.225976474 | 0.826054904 | 0.826054904 | -5.607246495 |
| 1436732_s_at | -0.035759524 | 8.64114757  | -0.225969519 | 0.826060157 | 0.826060157 | -5.607248006 |
| 1415797_at   | 0.019100635  | 8.487717715 | 0.225956079  | 0.82607031  | 0.82607031  | -5.607250925 |
| 1457223_at   | -0.014772894 | 4.496147046 | -0.22593324  | 0.826087563 | 0.826087563 | -5.607255886 |
| 1455550_x_at | -0.021300578 | 10.47433374 | -0.225838824 | 0.826158887 | 0.826158887 | -5.607276389 |
| 1443717_at   | -0.018538472 | 3.261251366 | -0.225816891 | 0.826175456 | 0.826175456 | -5.607281151 |
| 1452332_at   | -0.016395693 | 3.61513552  | -0.225809388 | 0.826181124 | 0.826181124 | -5.60728278  |

|              |              |             |              |             |             |              |
|--------------|--------------|-------------|--------------|-------------|-------------|--------------|
| 1460027_at   | -0.019344155 | 3.001613391 | -0.225789827 | 0.826195901 | 0.826195901 | -5.607287026 |
| 1438992_x_at | -0.041716241 | 8.638322264 | -0.225778329 | 0.826204588 | 0.826204588 | -5.607289522 |
| 1460067_at   | 0.017115502  | 6.254458206 | 0.225762272  | 0.826216717 | 0.826216717 | -5.607293006 |
| 1443137_at   | 0.020223344  | 3.782377265 | 0.225752047  | 0.826224442 | 0.826224442 | -5.607295226 |
| 1449138_at   | -0.013457482 | 11.35590885 | -0.225731491 | 0.826239972 | 0.826239972 | -5.607299687 |
| 1423661_s_at | 0.026298973  | 7.987320461 | 0.225722851  | 0.826246498 | 0.826246498 | -5.607301562 |
| 1456401_at   | -0.024539626 | 6.049151639 | -0.225665859 | 0.826289554 | 0.826289554 | -5.607313927 |
| 1452223_s_at | 0.021339975  | 7.736900976 | 0.225614694  | 0.826328207 | 0.826328207 | -5.607325026 |
| 1420751_at   | 0.017822531  | 3.221881849 | 0.225578437  | 0.826355599 | 0.826355599 | -5.60733289  |
| 1429621_at   | -0.029435736 | 9.171019532 | -0.225575547 | 0.826357782 | 0.826357782 | -5.607333516 |
| 1416420_a_at | 0.014193221  | 13.56477702 | 0.225414203  | 0.826479677 | 0.826479677 | -5.607368493 |
| 1460336_at   | 0.059962247  | 5.998908597 | 0.225377999  | 0.82650703  | 0.82650703  | -5.607376338 |
| 1425505_at   | 0.025962415  | 8.060342898 | 0.225373967  | 0.826510077 | 0.826510077 | -5.607377211 |
| 1427078_at   | 0.013768441  | 8.858051807 | 0.225360524  | 0.826520233 | 0.826520233 | -5.607380124 |
| 1424323_at   | 0.027468353  | 7.7875419   | 0.225341585  | 0.826534542 | 0.826534542 | -5.607384227 |
| 1445601_at   | 0.015916003  | 5.949523276 | 0.225331055  | 0.826542498 | 0.826542498 | -5.607386508 |
| 1436305_at   | 0.022601117  | 8.298963951 | 0.225275229  | 0.826584676 | 0.826584676 | -5.6073986   |
| 1444885_at   | 0.020187117  | 3.404442479 | 0.22526466   | 0.826592662 | 0.826592662 | -5.607400889 |
| 1433084_at   | 0.019594136  | 4.420389949 | 0.225254938  | 0.826600007 | 0.826600007 | -5.607402994 |
| 1420647_a_at | -0.03216006  | 10.71782259 | -0.225245222 | 0.826607347 | 0.826607347 | -5.607405098 |
| 1439285_at   | 0.027545454  | 4.467704363 | 0.225238526  | 0.826612406 | 0.826612406 | -5.607406548 |
| 1421575_at   | -0.014861579 | 3.159938577 | -0.22522086  | 0.826625754 | 0.826625754 | -5.607410373 |
| 1419386_at   | -0.016000263 | 3.290837903 | -0.225139717 | 0.826687063 | 0.826687063 | -5.60742794  |
| 1448677_at   | -0.016284246 | 9.120224515 | -0.225096635 | 0.826719614 | 0.826719614 | -5.607437264 |
| 1453039_at   | 0.01990064   | 7.266318661 | 0.225078661  | 0.826733194 | 0.826733194 | -5.607441153 |
| 1442258_at   | 0.01552366   | 6.724673934 | 0.225061208  | 0.826746381 | 0.826746381 | -5.60744493  |
| 1440738_at   | 0.016866233  | 3.173014307 | 0.224959317  | 0.82682337  | 0.82682337  | -5.607466971 |
| 1429456_a_at | -0.020471571 | 8.327945524 | -0.224952786 | 0.826828304 | 0.826828304 | -5.607468383 |
| 1451309_at   | -0.01736245  | 8.704730305 | -0.224900354 | 0.826867922 | 0.826867922 | -5.607479722 |
| 1426813_at   | -0.014717904 | 9.895637491 | -0.224892963 | 0.826873507 | 0.826873507 | -5.60748132  |
| 1447576_at   | 0.019744751  | 3.686365858 | 0.224865011  | 0.826894627 | 0.826894627 | -5.607487363 |
| 1436709_at   | -0.019001668 | 7.362103633 | -0.224856006 | 0.826901432 | 0.826901432 | -5.607489309 |
| 1418280_at   | 0.020148688  | 6.093706588 | 0.224814937  | 0.826932465 | 0.826932465 | -5.607498187 |
| 1445982_at   | -0.02230688  | 3.523144944 | -0.224812846 | 0.826934045 | 0.826934045 | -5.607498639 |
| 1424244_at   | -0.01836065  | 8.442910489 | -0.224730921 | 0.82699595  | 0.82699595  | -5.607516342 |
| 1447148_at   | 0.016112261  | 3.342712078 | 0.224721848  | 0.827002806 | 0.827002806 | -5.607518303 |
| 1447804_x_at | 0.025151308  | 5.918440703 | 0.224714551  | 0.82700832  | 0.82700832  | -5.607519879 |
| 1424527_at   | -0.013876186 | 9.096267426 | -0.22471105  | 0.827010965 | 0.827010965 | -5.607520635 |
| 1427383_at   | -0.016212205 | 4.253583268 | -0.22468878  | 0.827027793 | 0.827027793 | -5.607525446 |
| 1431008_at   | -0.022047555 | 4.63252151  | -0.224678103 | 0.827035862 | 0.827035862 | -5.607527753 |
| 1446044_at   | 0.016685758  | 3.769819659 | 0.224632884  | 0.827070032 | 0.827070032 | -5.607537519 |
| 1460673_at   | 0.015925843  | 8.23449691  | 0.224603975  | 0.827091877 | 0.827091877 | -5.607543762 |
| 1427904_s_at | -0.019761801 | 8.490404958 | -0.224582733 | 0.827107929 | 0.827107929 | -5.607548349 |
| 1457315_at   | -0.018922211 | 5.257009779 | -0.224563627 | 0.827122367 | 0.827122367 | -5.607552474 |
| 1424496_at   | -0.016141729 | 8.17973692  | -0.224533729 | 0.82714496  | 0.82714496  | -5.607558929 |
| 1441123_at   | 0.017615962  | 5.872064852 | 0.224516047  | 0.827158322 | 0.827158322 | -5.607562745 |
| 1450691_at   | -0.016896154 | 7.941321702 | -0.224496622 | 0.827173001 | 0.827173001 | -5.607566938 |
| 1419950_s_at | 0.022567628  | 9.15620438  | 0.224423744  | 0.827228075 | 0.827228075 | -5.607582665 |
| 1422732_at   | 0.020492885  | 9.100170354 | 0.22437956   | 0.827261464 | 0.827261464 | -5.607592198 |
| 1459826_at   | -0.013200366 | 3.145536946 | -0.224276295 | 0.827339504 | 0.827339504 | -5.607614469 |
| 1450791_at   | -0.018014785 | 4.683207633 | -0.224253901 | 0.827356427 | 0.827356427 | -5.607619298 |
| 1441985_at   | 0.022730775  | 3.534274999 | 0.224230197  | 0.827374341 | 0.827374341 | -5.607624408 |
| 1440124_at   | -0.020995019 | 3.392058898 | -0.224223945 | 0.827379066 | 0.827379066 | -5.607625756 |

|              |              |             |              |             |             |              |
|--------------|--------------|-------------|--------------|-------------|-------------|--------------|
| 1450580_at   | 0.020124334  | 4.677269818 | 0.224215574  | 0.827385393 | 0.827385393 | -5.607627561 |
| 1440897_at   | 0.019029926  | 3.640329688 | 0.224149666  | 0.827435202 | 0.827435202 | -5.607641766 |
| 1451732_at   | -0.01744955  | 6.726835121 | -0.224104684 | 0.827469197 | 0.827469197 | -5.607651459 |
| 1417602_at   | -0.022644023 | 6.227847614 | -0.22409961  | 0.827473032 | 0.827473032 | -5.607652552 |
| 1419925_s_at | 0.016664759  | 9.156541494 | 0.224054127  | 0.827507406 | 0.827507406 | -5.607662351 |
| 1456848_at   | 0.024251662  | 4.235500454 | 0.2240313    | 0.827524658 | 0.827524658 | -5.607667268 |
| 1446532_at   | -0.017328716 | 3.669827972 | -0.224029215 | 0.827526234 | 0.827526234 | -5.607667717 |
| 1457877_at   | -0.023997053 | 4.273102542 | -0.224013003 | 0.827538487 | 0.827538487 | -5.607671209 |
| 1457844_a_at | 0.019585706  | 5.996647548 | 0.223983992  | 0.827560413 | 0.827560413 | -5.607677457 |
| 1431094_at   | -0.021189008 | 8.913945043 | -0.223969925 | 0.827571044 | 0.827571044 | -5.607680486 |
| 1441626_at   | -0.016496616 | 5.804130212 | -0.223920133 | 0.827608676 | 0.827608676 | -5.607691206 |
| 1421016_at   | 0.020023941  | 5.865140234 | 0.223890173  | 0.82763132  | 0.82763132  | -5.607697656 |
| 1428288_at   | -0.02387011  | 8.391062481 | -0.223853302 | 0.827659187 | 0.827659187 | -5.607705592 |
| 1427886_at   | -0.019139047 | 10.38484205 | -0.223828165 | 0.827678186 | 0.827678186 | -5.607711002 |
| 1416175_a_at | 0.017850951  | 11.09295926 | 0.223775933  | 0.827717663 | 0.827717663 | -5.607722241 |
| 1431291_at   | -0.021827344 | 6.337569578 | -0.223736532 | 0.827747443 | 0.827747443 | -5.607730717 |
| 1419052_at   | -0.018279678 | 4.111380173 | -0.223680415 | 0.827789858 | 0.827789858 | -5.607742787 |
| 1441064_at   | -0.016790485 | 3.992462173 | -0.223515869 | 0.827914231 | 0.827914231 | -5.607778162 |
| 1417864_at   | -0.014116473 | 12.02587578 | -0.22350992  | 0.827918728 | 0.827918728 | -5.60777944  |
| 1449668_s_at | 0.029592564  | 7.88695515  | 0.223493921  | 0.827930821 | 0.827930821 | -5.607782878 |
| 1417834_at   | 0.020231484  | 8.190171755 | 0.223491147  | 0.827932918 | 0.827932918 | -5.607783474 |
| 1449510_at   | 0.032002553  | 7.012948315 | 0.223461659  | 0.827955208 | 0.827955208 | -5.60778981  |
| 1459314_at   | -0.027831037 | 5.778931681 | -0.223458483 | 0.827957608 | 0.827957608 | -5.607790492 |
| 1418080_at   | -0.025386137 | 7.967798162 | -0.223440865 | 0.827970925 | 0.827970925 | -5.607794277 |
| 1448806_at   | -0.019084957 | 6.034036896 | -0.223435488 | 0.827974989 | 0.827974989 | -5.607795433 |
| 1443727_x_at | -0.01594876  | 6.468961183 | -0.223433169 | 0.827976742 | 0.827976742 | -5.607795931 |
| 1456053_at   | 0.024115912  | 4.562678815 | 0.223426926  | 0.827981461 | 0.827981461 | -5.607797272 |
| 1451234_at   | 0.022884567  | 8.390112629 | 0.223411133  | 0.827993399 | 0.827993399 | -5.607800664 |
| 1434313_at   | 0.026281743  | 6.890899157 | 0.223360176  | 0.828031917 | 0.828031917 | -5.607811609 |
| 1445111_at   | 0.091625625  | 5.387586512 | 0.223349248  | 0.828040178 | 0.828040178 | -5.607813956 |
| 1455939_x_at | -0.020017202 | 10.9803447  | -0.223317914 | 0.828063863 | 0.828063863 | -5.607820684 |
| 1435231_at   | 0.016624037  | 7.901562742 | 0.223308187  | 0.828071215 | 0.828071215 | -5.607822772 |
| 1422890_at   | 0.02455916   | 8.955018381 | 0.223299053  | 0.82807812  | 0.82807812  | -5.607824734 |
| 1453758_at   | 0.018713653  | 3.637797272 | 0.223288811  | 0.828085862 | 0.828085862 | -5.607826933 |
| 1422956_at   | -0.021039736 | 4.254105961 | -0.223238971 | 0.828123537 | 0.828123537 | -5.607837631 |
| 1435215_at   | -0.02851732  | 5.461596244 | -0.22321441  | 0.828142103 | 0.828142103 | -5.607842903 |
| 1447079_at   | 0.030012232  | 4.191785932 | 0.223203475  | 0.828150369 | 0.828150369 | -5.607845249 |
| 1449282_at   | 0.015508627  | 4.481326041 | 0.223113633  | 0.828218283 | 0.828218283 | -5.607864526 |
| 1443384_at   | -0.014819757 | 6.144328306 | -0.22305012  | 0.828266296 | 0.828266296 | -5.607878149 |
| 1455301_at   | 0.016540711  | 6.597522218 | 0.223018292  | 0.828290357 | 0.828290357 | -5.607884975 |
| 1454640_at   | -0.015099499 | 8.942092251 | -0.222994587 | 0.828308277 | 0.828308277 | -5.607890057 |
| 1457747_at   | 0.015927508  | 3.355047966 | 0.222955312  | 0.828337967 | 0.828337967 | -5.607898477 |
| 1417469_at   | 0.028672025  | 4.944739182 | 0.222876464  | 0.828397575 | 0.828397575 | -5.607915377 |
| 1450603_s_at | -0.020051138 | 3.183902114 | -0.222818955 | 0.828441051 | 0.828441051 | -5.6079277   |
| 1451537_at   | -0.031147733 | 4.754744188 | -0.222729905 | 0.828508374 | 0.828508374 | -5.607946774 |
| 1423370_a_at | -0.024686179 | 8.949064251 | -0.22272297  | 0.828513617 | 0.828513617 | -5.607948259 |
| 1448059_at   | 0.022489661  | 3.833351132 | 0.22269105   | 0.828537748 | 0.828537748 | -5.607955094 |
| 1451239_a_at | -0.034354327 | 4.313102432 | -0.222687191 | 0.828540666 | 0.828540666 | -5.607955921 |
| 1454489_at   | -0.015358338 | 4.567017596 | -0.222596649 | 0.828609119 | 0.828609119 | -5.607975303 |
| 1418746_at   | 0.020900282  | 8.640026977 | 0.222545231  | 0.828647993 | 0.828647993 | -5.607986307 |
| 1449187_at   | 0.014998634  | 8.96837105  | 0.222533666  | 0.828656737 | 0.828656737 | -5.607988781 |
| 1441628_at   | -0.021247621 | 4.622450656 | -0.222500763 | 0.828681613 | 0.828681613 | -5.607995821 |
| 1435955_at   | 0.02478801   | 4.820356503 | 0.222489221  | 0.82869034  | 0.82869034  | -5.60799829  |

|              |              |             |              |             |             |              |
|--------------|--------------|-------------|--------------|-------------|-------------|--------------|
| 1424195_a_at | -0.018669809 | 6.192542955 | -0.222455679 | 0.828715699 | 0.828715699 | -5.608005465 |
| 1446521_at   | -0.019793938 | 6.137131674 | -0.222356546 | 0.828790651 | 0.828790651 | -5.608026665 |
| 1428163_at   | 0.018414071  | 10.00661458 | 0.22235078   | 0.828795011 | 0.828795011 | -5.608027898 |
| 1437943_s_at | 0.016257078  | 7.767298591 | 0.222341015  | 0.828802394 | 0.828802394 | -5.608029985 |
| 1423757_x_at | 0.025002056  | 11.71099925 | 0.222328256  | 0.828812041 | 0.828812041 | -5.608032713 |
| 1419030_at   | 0.016508409  | 7.940769883 | 0.22230376   | 0.828830562 | 0.828830562 | -5.608037949 |
| 1443442_at   | -0.014383893 | 3.217934818 | -0.222238637 | 0.828879801 | 0.828879801 | -5.608051867 |
| 1430980_a_at | 0.014388577  | 12.4489473  | 0.222237872  | 0.82888038  | 0.82888038  | -5.608052031 |
| 1443652_x_at | 0.017760693  | 4.544394688 | 0.222216373  | 0.828896635 | 0.828896635 | -5.608056625 |
| 1457959_at   | 0.016052164  | 3.533601737 | 0.222175025  | 0.828927899 | 0.828927899 | -5.608065459 |
| 1438281_x_at | -0.020544621 | 3.962822231 | -0.222170421 | 0.82893138  | 0.82893138  | -5.608066442 |
| 1445008_at   | -0.018579433 | 7.356119221 | -0.222135831 | 0.828957535 | 0.828957535 | -5.608073831 |
| 1456590_x_at | -0.029578283 | 8.924691238 | -0.222129999 | 0.828961944 | 0.828961944 | -5.608075076 |
| 1453531_at   | -0.018699939 | 5.807665006 | -0.222127867 | 0.828963557 | 0.828963557 | -5.608075532 |
| 1425889_at   | -0.016122953 | 4.292295788 | -0.222106839 | 0.828979456 | 0.828979456 | -5.608080023 |
| 1424253_at   | 0.026373691  | 9.600581989 | 0.222106098  | 0.828980016 | 0.828980016 | -5.608080181 |
| 1418324_at   | 0.013983503  | 10.75189233 | 0.222068405  | 0.829008517 | 0.829008517 | -5.60808823  |
| 1439567_at   | 0.026037545  | 4.933599946 | 0.222067442  | 0.829009245 | 0.829009245 | -5.608088436 |
| 1438267_x_at | 0.015867853  | 10.46136072 | 0.222053532  | 0.829019764 | 0.829019764 | -5.608091406 |
| 1450749_a_at | -0.024062492 | 5.715013578 | -0.222011954 | 0.829051202 | 0.829051202 | -5.608100283 |
| 1422950_at   | 0.013392136  | 5.39491367  | 0.222008172  | 0.829054062 | 0.829054062 | -5.60810109  |
| 1421407_at   | 0.015088303  | 4.749872703 | 0.221994872  | 0.829064119 | 0.829064119 | -5.608103929 |
| 1443373_at   | -0.019222085 | 4.637943134 | -0.221968041 | 0.829084407 | 0.829084407 | -5.608109656 |
| 1438622_x_at | -0.014997118 | 5.37279075  | -0.221950607 | 0.82909759  | 0.82909759  | -5.608113377 |
| 1434003_a_at | -0.019953988 | 7.757044461 | -0.221865619 | 0.829161855 | 0.829161855 | -5.608131511 |
| 1453993_a_at | 0.014575808  | 9.546619595 | 0.22180513   | 0.829207595 | 0.829207595 | -5.608144414 |
| 1418521_a_at | 0.016330675  | 10.69295931 | 0.221804161  | 0.829208328 | 0.829208328 | -5.60814462  |
| 1434604_at   | 0.017187011  | 9.481604915 | 0.221779422  | 0.829227036 | 0.829227036 | -5.608149896 |
| 1440714_at   | 0.019552649  | 3.429334301 | 0.221778535  | 0.829227706 | 0.829227706 | -5.608150085 |
| 1447098_at   | -0.01704276  | 3.288072999 | -0.221770085 | 0.829234096 | 0.829234096 | -5.608151888 |
| 1438884_at   | 0.107199236  | 5.315908515 | 0.22175932   | 0.829242237 | 0.829242237 | -5.608154183 |
| 1436795_at   | 0.014632838  | 8.30287803  | 0.221747022  | 0.829251536 | 0.829251536 | -5.608156805 |
| 1417745_at   | -0.021079131 | 3.891559116 | -0.221731298 | 0.829263426 | 0.829263426 | -5.608160158 |
| 1448379_at   | 0.016047019  | 8.217476815 | 0.221729829  | 0.829264537 | 0.829264537 | -5.608160471 |
| 1426695_at   | 0.017944904  | 5.991864934 | 0.22168584   | 0.829297802 | 0.829297802 | -5.608169849 |
| 1423346_at   | 0.022009082  | 9.453028582 | 0.221675797  | 0.829305397 | 0.829305397 | -5.60817199  |
| 1421058_at   | 0.038453639  | 4.673388467 | 0.221661848  | 0.829315945 | 0.829315945 | -5.608174963 |
| 1437202_at   | -0.019401124 | 7.774472602 | -0.221599907 | 0.829362786 | 0.829362786 | -5.608188163 |
| 1417604_at   | 0.016039736  | 7.735899694 | 0.221580218  | 0.829377675 | 0.829377675 | -5.608192358 |
| 1440650_at   | 0.018362927  | 7.381716457 | 0.221560337  | 0.82939271  | 0.82939271  | -5.608196594 |
| 1426403_at   | -0.033253391 | 7.222735981 | -0.221522371 | 0.829421421 | 0.829421421 | -5.608204682 |
| 1423187_at   | -0.017738885 | 9.432117277 | -0.221490423 | 0.829445581 | 0.829445581 | -5.608211487 |
| 1450045_at   | -0.019622442 | 7.080976802 | -0.221475014 | 0.829457235 | 0.829457235 | -5.608214768 |
| 1417787_at   | -0.015651169 | 5.348979314 | -0.221470821 | 0.829460406 | 0.829460406 | -5.608215661 |
| 1421615_at   | -0.016946828 | 5.114073192 | -0.221437797 | 0.82948538  | 0.82948538  | -5.608222693 |
| 1415933_a_at | 0.017931354  | 11.54315748 | 0.221432983  | 0.82948902  | 0.82948902  | -5.608223718 |
| 1429322_at   | 0.022126625  | 4.06470135  | 0.221415926  | 0.82950192  | 0.82950192  | -5.60822735  |
| 1460043_at   | 0.026634512  | 3.615573991 | 0.221390578  | 0.829521089 | 0.829521089 | -5.608232747 |
| 1422400_a_at | -0.01816543  | 4.469029736 | -0.221389624 | 0.829521811 | 0.829521811 | -5.60823295  |
| 1436745_at   | -0.028827954 | 8.540386386 | -0.221357053 | 0.829546443 | 0.829546443 | -5.608239883 |
| 1454305_at   | 0.022648771  | 5.564507483 | 0.221352365  | 0.829549989 | 0.829549989 | -5.608240881 |
| 1445887_at   | 0.026639815  | 5.227859442 | 0.221346388  | 0.829554509 | 0.829554509 | -5.608242153 |
| 1431254_at   | 0.022533164  | 4.519952702 | 0.221340098  | 0.829559266 | 0.829559266 | -5.608243492 |

|              |              |             |              |             |             |              |
|--------------|--------------|-------------|--------------|-------------|-------------|--------------|
| 1435160_at   | -0.014613697 | 9.618926476 | -0.221319814 | 0.829574606 | 0.829574606 | -5.608247809 |
| 1450965_at   | 0.014878144  | 8.848582232 | 0.221253811  | 0.829624523 | 0.829624523 | -5.608261853 |
| 1438694_at   | -0.017476407 | 3.463274974 | -0.221250867 | 0.829626749 | 0.829626749 | -5.608262479 |
| 1419723_at   | -0.01823929  | 5.159345788 | -0.221247545 | 0.829629262 | 0.829629262 | -5.608263186 |
| 1438965_x_at | -0.017266428 | 3.328226714 | -0.221227582 | 0.829644359 | 0.829644359 | -5.608267433 |
| 1458804_at   | -0.016788743 | 3.362202858 | -0.221139145 | 0.829711244 | 0.829711244 | -5.608286242 |
| 1444050_at   | -0.014455292 | 3.837754572 | -0.221123409 | 0.829723146 | 0.829723146 | -5.608289589 |
| 1453453_at   | 0.018376753  | 4.28501302  | 0.221089923  | 0.829748472 | 0.829748472 | -5.608296708 |
| 1452730_at   | -0.024605245 | 9.835026448 | -0.221081262 | 0.829755022 | 0.829755022 | -5.608298549 |
| 1438748_at   | -0.028074923 | 4.616463339 | -0.221080211 | 0.829755817 | 0.829755817 | -5.608298773 |
| 1426896_at   | -0.025911634 | 7.325603272 | -0.221072337 | 0.829761772 | 0.829761772 | -5.608300447 |
| 1456357_at   | -0.015510751 | 9.393020282 | -0.221029604 | 0.829794092 | 0.829794092 | -5.60830953  |
| 1453393_a_at | 0.021238588  | 3.667601672 | 0.22095289   | 0.829852114 | 0.829852114 | -5.608325832 |
| 1420595_at   | -0.017965795 | 4.880173576 | -0.220949335 | 0.829854802 | 0.829854802 | -5.608326587 |
| 1438040_a_at | -0.016058856 | 11.63948937 | -0.220948864 | 0.829855158 | 0.829855158 | -5.608326687 |
| 1453398_at   | -0.024854852 | 3.878384445 | -0.220927299 | 0.829871469 | 0.829871469 | -5.608331269 |
| 1454277_at   | -0.017229138 | 4.584942209 | -0.220913664 | 0.829881782 | 0.829881782 | -5.608334166 |
| 1425578_a_at | -0.02690661  | 5.460107338 | -0.220897174 | 0.829894254 | 0.829894254 | -5.608337669 |
| 1459039_at   | 0.020242304  | 3.698395103 | 0.220867527  | 0.829916678 | 0.829916678 | -5.608343965 |
| 1458747_at   | -0.024024319 | 4.118994646 | -0.220834698 | 0.829941508 | 0.829941508 | -5.608350937 |
| 1440976_at   | -0.019847251 | 5.347471089 | -0.220815832 | 0.829955778 | 0.829955778 | -5.608354944 |
| 1459054_at   | 0.029689651  | 4.502625987 | 0.220744745  | 0.830009546 | 0.830009546 | -5.608370035 |
| 1441024_at   | 0.024617517  | 4.739155208 | 0.220697958  | 0.830044935 | 0.830044935 | -5.608379966 |
| 1447528_at   | -0.01647515  | 3.962081997 | -0.220689335 | 0.830051458 | 0.830051458 | -5.608381796 |
| 1434512_x_at | 0.019933445  | 10.29085713 | 0.220664619  | 0.830070152 | 0.830070152 | -5.608387041 |
| 1443477_at   | -0.01738258  | 4.137313655 | -0.220610131 | 0.830111367 | 0.830111367 | -5.608398601 |
| 1428167_a_at | -0.038973275 | 9.37332123  | -0.22060171  | 0.830117737 | 0.830117737 | -5.608400388 |
| 1459331_at   | 0.024349419  | 4.285781195 | 0.220547505  | 0.830158738 | 0.830158738 | -5.608411885 |
| 1436767_at   | 0.023573743  | 10.13670915 | 0.220478652  | 0.830210821 | 0.830210821 | -5.608426485 |
| 1448206_at   | 0.014793249  | 11.544325   | 0.220459274  | 0.830225478 | 0.830225478 | -5.608430594 |
| 1460738_at   | -0.021181321 | 5.619169801 | -0.220454654 | 0.830228973 | 0.830228973 | -5.608431573 |
| 1450205_at   | 0.02049911   | 4.853378387 | 0.220450853  | 0.830231849 | 0.830231849 | -5.608432379 |
| 1456407_a_at | -0.029577458 | 6.96567793  | -0.220425018 | 0.830251391 | 0.830251391 | -5.608437855 |
| 1431583_at   | -0.016303015 | 3.722607062 | -0.220407015 | 0.830265009 | 0.830265009 | -5.608441671 |
| 1455991_at   | 0.01614516   | 7.991184529 | 0.220402327  | 0.830268555 | 0.830268555 | -5.608442665 |
| 1443542_at   | -0.019832945 | 3.328669679 | -0.220375483 | 0.830288861 | 0.830288861 | -5.608448354 |
| 1439365_at   | 0.013571019  | 3.348059715 | 0.220347159  | 0.830310287 | 0.830310287 | -5.608454356 |
| 1439972_at   | 0.02427489   | 9.168005378 | 0.220333586  | 0.830320554 | 0.830320554 | -5.608457232 |
| 1426205_at   | 0.027919297  | 10.73521609 | 0.220309592  | 0.830338705 | 0.830338705 | -5.608462315 |
| 1427813_at   | 0.015167358  | 3.561003453 | 0.220294266  | 0.830350299 | 0.830350299 | -5.608465562 |
| 1426940_at   | -0.016049001 | 8.569288235 | -0.220285933 | 0.830356602 | 0.830356602 | -5.608467327 |
| 1440737_at   | -0.029387831 | 4.046405868 | -0.220269996 | 0.830368657 | 0.830368657 | -5.608470703 |
| 1459743_at   | 0.016166699  | 3.583670164 | 0.220163362  | 0.830449324 | 0.830449324 | -5.608493285 |
| 1441872_x_at | -0.018499856 | 4.038257095 | -0.220149304 | 0.830459959 | 0.830459959 | -5.608496261 |
| 1459236_at   | 0.016338772  | 3.032856523 | 0.220049655  | 0.830535343 | 0.830535343 | -5.608517352 |
| 1460306_at   | -0.023227531 | 4.007944659 | -0.219997616 | 0.830574711 | 0.830574711 | -5.608528363 |
| 1444537_at   | -0.02446317  | 5.171186394 | -0.219931166 | 0.830624982 | 0.830624982 | -5.608542419 |
| 1431825_at   | 0.019157017  | 4.647465167 | 0.219902088  | 0.83064698  | 0.83064698  | -5.608548568 |
| 1452909_at   | 0.019229824  | 7.431125412 | 0.219863205  | 0.830676397 | 0.830676397 | -5.60855679  |
| 1442983_at   | -0.017818593 | 6.692474843 | -0.219801543 | 0.830723047 | 0.830723047 | -5.608569826 |
| 1436116_x_at | -0.033603928 | 4.007640204 | -0.219778723 | 0.830740312 | 0.830740312 | -5.608574649 |
| 1447008_at   | 0.015917377  | 3.417154084 | 0.219777846  | 0.830740976 | 0.830740976 | -5.608574835 |
| 1437007_x_at | 0.021165349  | 9.867527285 | 0.219756977  | 0.830756764 | 0.830756764 | -5.608579245 |

|              |              |             |              |             |             |              |
|--------------|--------------|-------------|--------------|-------------|-------------|--------------|
| 1435309_at   | -0.018400403 | 4.797219416 | -0.219681678 | 0.830813733 | 0.830813733 | -5.608595155 |
| 1429274_at   | -0.030844819 | 7.555464211 | -0.219638116 | 0.830846691 | 0.830846691 | -5.608604357 |
| 1415941_s_at | 0.026562142  | 7.024176997 | 0.219623342  | 0.830857869 | 0.830857869 | -5.608607478 |
| 1456628_x_at | 0.019750406  | 12.46589701 | 0.219606111  | 0.830870905 | 0.830870905 | -5.608611117 |
| 1420633_a_at | 0.014847126  | 3.320333134 | 0.219583695  | 0.830887865 | 0.830887865 | -5.60861585  |
| 1456202_at   | -0.02258465  | 4.988964278 | -0.219575022 | 0.830894427 | 0.830894427 | -5.608617682 |
| 1426566_s_at | -0.020114498 | 7.329572646 | -0.219573863 | 0.830895304 | 0.830895304 | -5.608617927 |
| 1438224_at   | -0.029349604 | 4.477806226 | -0.219549278 | 0.830913905 | 0.830913905 | -5.608623117 |
| 1445441_at   | 0.01689205   | 4.185159874 | 0.219530996  | 0.830927737 | 0.830927737 | -5.608626977 |
| 1436752_at   | -0.018490248 | 6.617416751 | -0.219522315 | 0.830934305 | 0.830934305 | -5.60862881  |
| 1457783_at   | -0.016818032 | 6.587249997 | -0.219513233 | 0.830941176 | 0.830941176 | -5.608630727 |
| 1435535_at   | -0.027053568 | 6.946110244 | -0.219465384 | 0.83097738  | 0.83097738  | -5.608640827 |
| 1432428_at   | -0.019302036 | 3.710379435 | -0.219432725 | 0.83100209  | 0.83100209  | -5.608647719 |
| 1437242_at   | -0.015390319 | 8.238426406 | -0.219388906 | 0.831035245 | 0.831035245 | -5.608656965 |
| 1424975_at   | -0.019335129 | 3.257576779 | -0.219312215 | 0.831093272 | 0.831093272 | -5.608673143 |
| 1417221_at   | -0.024413803 | 4.028175691 | -0.219309606 | 0.831095246 | 0.831095246 | -5.608673693 |
| 1453116_at   | -0.016070531 | 6.520865403 | -0.219298554 | 0.831103608 | 0.831103608 | -5.608676024 |
| 1416374_at   | -0.016862511 | 8.503508448 | -0.219295704 | 0.831105765 | 0.831105765 | -5.608676625 |
| 1423427_at   | 0.022441572  | 4.66952339  | 0.219280583  | 0.831117206 | 0.831117206 | -5.608679814 |
| 1417759_at   | -0.017070922 | 3.824767074 | -0.219254674 | 0.83113681  | 0.83113681  | -5.608685277 |
| 1433947_at   | -0.018878931 | 4.301986793 | -0.219226385 | 0.831158215 | 0.831158215 | -5.608691241 |
| 1447443_at   | -0.030636035 | 4.434860128 | -0.219173496 | 0.831198234 | 0.831198234 | -5.608702391 |
| 1418360_at   | 0.017057533  | 5.040403112 | 0.219166569  | 0.831203476 | 0.831203476 | -5.60870385  |
| 1460335_at   | 0.023809605  | 8.749967538 | 0.219059239  | 0.83128469  | 0.83128469  | -5.608726467 |
| 1446476_at   | -0.024059314 | 4.438786847 | -0.219033268 | 0.831304342 | 0.831304342 | -5.608731938 |
| 1426108_s_at | -0.040462883 | 5.546441396 | -0.219028669 | 0.831307822 | 0.831307822 | -5.608732907 |
| 1458724_at   | -0.025958326 | 6.239049494 | -0.219007062 | 0.831324172 | 0.831324172 | -5.608737458 |
| 1426472_at   | -0.020025238 | 3.70589833  | -0.218942454 | 0.831373061 | 0.831373061 | -5.608751063 |
| 1424977_at   | 0.017987284  | 3.472491185 | 0.218820578  | 0.831465287 | 0.831465287 | -5.608776718 |
| 1448367_at   | -0.040366543 | 5.220558248 | -0.218779649 | 0.83149626  | 0.83149626  | -5.60878533  |
| 1454943_a_at | 0.013714781  | 7.173396821 | 0.218770428  | 0.831503238 | 0.831503238 | -5.60878727  |
| 1417892_a_at | -0.021324556 | 7.385191589 | -0.218754411 | 0.831515359 | 0.831515359 | -5.60879064  |
| 1442254_at   | -0.018469217 | 6.755586703 | -0.21873531  | 0.831529813 | 0.831529813 | -5.608794658 |
| 1450253_a_at | -0.020523597 | 8.003462126 | -0.218687258 | 0.831566176 | 0.831566176 | -5.608804765 |
| 1425121_a_at | 0.01590885   | 3.548424149 | 0.21862608   | 0.831612473 | 0.831612473 | -5.60881763  |
| 1421509_at   | 0.014989706  | 3.601603232 | 0.218586312  | 0.831642569 | 0.831642569 | -5.608825991 |
| 1444251_x_at | 0.01749954   | 4.933398805 | 0.21851912   | 0.831693419 | 0.831693419 | -5.608840114 |
| 1443276_at   | -0.013483514 | 3.715519132 | -0.218499234 | 0.831708468 | 0.831708468 | -5.608844293 |
| 1443476_at   | 0.016700963  | 4.703341152 | 0.218460597  | 0.831737709 | 0.831737709 | -5.608852411 |
| 1431357_a_at | -0.025307083 | 4.081628617 | -0.218453144 | 0.831743349 | 0.831743349 | -5.608853977 |
| 1419483_at   | -0.023570898 | 5.463109634 | -0.218437865 | 0.831754912 | 0.831754912 | -5.608857187 |
| 1449608_a_at | -0.020890684 | 4.747065195 | -0.218428    | 0.831762378 | 0.831762378 | -5.608859259 |
| 1459198_at   | 0.0223777    | 5.050940248 | 0.218409895  | 0.83177608  | 0.83177608  | -5.608863062 |
| 1427796_at   | -0.023487295 | 3.840937841 | -0.218402753 | 0.831781485 | 0.831781485 | -5.608864562 |
| 1458763_at   | -0.013885348 | 3.248364145 | -0.218389125 | 0.831791799 | 0.831791799 | -5.608867425 |
| 1426592_a_at | 0.017931184  | 7.955492631 | 0.218350493  | 0.831821036 | 0.831821036 | -5.608875538 |
| 1438683_at   | -0.028661494 | 7.770151978 | -0.218347801 | 0.831823073 | 0.831823073 | -5.608876103 |
| 1424915_s_at | -0.017266224 | 9.356079994 | -0.218343644 | 0.831826219 | 0.831826219 | -5.608876976 |
| 1443735_at   | -0.020271961 | 3.235317111 | -0.218314133 | 0.831848554 | 0.831848554 | -5.608883173 |
| 1427826_a_at | -0.017269746 | 3.189369809 | -0.218305015 | 0.831855455 | 0.831855455 | -5.608885087 |
| 1445277_at   | -0.025097609 | 5.337107074 | -0.218248065 | 0.831898556 | 0.831898556 | -5.608897042 |
| 1450354_a_at | -0.021582987 | 7.579053746 | -0.218207224 | 0.831929467 | 0.831929467 | -5.608905614 |
| 1427230_at   | 0.022264246  | 7.593360204 | 0.218190882  | 0.831941835 | 0.831941835 | -5.608909043 |

|              |              |             |              |             |             |              |
|--------------|--------------|-------------|--------------|-------------|-------------|--------------|
| 1433116_at   | 0.020351848  | 4.219013568 | 0.218183313  | 0.831947563 | 0.831947563 | -5.608910631 |
| 1419162_s_at | 0.01813075   | 7.960338394 | 0.218182474  | 0.831948199 | 0.831948199 | -5.608910807 |
| 1417589_at   | -0.018440951 | 3.306625388 | -0.218179477 | 0.831950466 | 0.831950466 | -5.608911436 |
| 1419436_at   | 0.015517701  | 3.082468805 | 0.218152082  | 0.8319712   | 0.8319712   | -5.608917184 |
| 1432645_at   | -0.016130732 | 4.112738501 | -0.218136376 | 0.831983088 | 0.831983088 | -5.608920479 |
| 1450385_at   | -0.016036752 | 8.666585909 | -0.218097508 | 0.832012506 | 0.832012506 | -5.608928633 |
| 1430888_at   | 0.01828789   | 5.612441318 | 0.21808014   | 0.832025651 | 0.832025651 | -5.608932276 |
| 1417681_at   | -0.013697757 | 11.1297862  | -0.218053642 | 0.832045706 | 0.832045706 | -5.608937833 |
| 1426784_at   | 0.014294118  | 6.274790487 | 0.218046723  | 0.832050943 | 0.832050943 | -5.608939284 |
| 1427034_at   | -0.016974828 | 7.385182558 | -0.218029618 | 0.832063889 | 0.832063889 | -5.608942871 |
| 1447400_at   | -0.016345181 | 5.885478741 | -0.217986536 | 0.832096497 | 0.832096497 | -5.608951903 |
| 1431858_at   | 0.019413605  | 3.337602024 | 0.217839442  | 0.832207833 | 0.832207833 | -5.608982731 |
| 1441184_at   | 0.016135887  | 3.796361092 | 0.217819383  | 0.832223015 | 0.832223015 | -5.608986933 |
| 1424365_at   | 0.016785864  | 9.969828575 | 0.217819174  | 0.832223174 | 0.832223174 | -5.608986977 |
| 1435847_at   | -0.016565115 | 8.500093529 | -0.217810792 | 0.832229518 | 0.832229518 | -5.608988733 |
| 1441589_at   | -0.015250322 | 3.41390259  | -0.217808505 | 0.832231249 | 0.832231249 | -5.608989212 |
| 1443098_at   | 0.016849207  | 3.99958872  | 0.217762026  | 0.83226643  | 0.83226643  | -5.608998948 |
| 1457253_at   | -0.024026751 | 5.339682834 | -0.217653662 | 0.832348455 | 0.832348455 | -5.609021637 |
| 1452806_at   | -0.017896392 | 4.195334256 | -0.217653359 | 0.832348683 | 0.832348683 | -5.6090217   |
| 1456467_s_at | -0.048170576 | 5.931101419 | -0.217610135 | 0.832381402 | 0.832381402 | -5.609030748 |
| 1421735_a_at | -0.029800084 | 5.332304155 | -0.217580271 | 0.832404008 | 0.832404008 | -5.609036997 |
| 1422776_at   | -0.02055127  | 5.55466604  | -0.217533994 | 0.832439038 | 0.832439038 | -5.60904668  |
| 1432216_s_at | 0.03757216   | 5.846539233 | 0.21752687   | 0.83244443  | 0.83244443  | -5.609048171 |
| 1431942_at   | -0.018625432 | 4.023567015 | -0.217514719 | 0.832453628 | 0.832453628 | -5.609050713 |
| 1429808_at   | -0.024870967 | 4.333264052 | -0.217498128 | 0.832466187 | 0.832466187 | -5.609054183 |
| 1442988_at   | -0.015711581 | 3.757304838 | -0.21746387  | 0.83249212  | 0.83249212  | -5.609061349 |
| 1435942_at   | -0.030881716 | 4.203233864 | -0.217416502 | 0.832527977 | 0.832527977 | -5.609071255 |
| 1425911_a_at | -0.027711535 | 9.50700263  | -0.21741537  | 0.832528834 | 0.832528834 | -5.609071492 |
| 1445770_at   | 0.02246043   | 3.560920587 | 0.217409132  | 0.832533556 | 0.832533556 | -5.609072796 |
| 1429216_at   | -0.027524047 | 4.322089354 | -0.217365836 | 0.83256633  | 0.83256633  | -5.609081848 |
| 1430011_at   | 0.013867329  | 3.601614351 | 0.217358737  | 0.832571704 | 0.832571704 | -5.609083333 |
| 1416438_at   | -0.017014051 | 10.64205861 | -0.217357114 | 0.832572933 | 0.832572933 | -5.609083672 |
| 1438909_at   | -0.015750239 | 6.164097845 | -0.217332952 | 0.832591224 | 0.832591224 | -5.609088723 |
| 1441680_at   | 0.021104925  | 8.896750955 | 0.21729666   | 0.832618697 | 0.832618697 | -5.609096308 |
| 1434602_at   | -0.01624346  | 7.687571552 | -0.217292769 | 0.832621642 | 0.832621642 | -5.609097121 |
| 1427388_at   | 0.022642624  | 3.539695163 | 0.217290558  | 0.832623316 | 0.832623316 | -5.609097583 |
| 1420422_at   | -0.0188474   | 6.52023264  | -0.217192958 | 0.832697201 | 0.832697201 | -5.609117976 |
| 1459238_at   | 0.014358403  | 6.610286559 | 0.217192378  | 0.83269764  | 0.83269764  | -5.609118097 |
| 1444594_at   | 0.021845461  | 4.030771763 | 0.217187457  | 0.832701365 | 0.832701365 | -5.609119125 |
| 1431400_a_at | -0.022881191 | 5.367430893 | -0.217180313 | 0.832706774 | 0.832706774 | -5.609120617 |
| 1449500_at   | -0.057859387 | 5.172352047 | -0.217077974 | 0.832784248 | 0.832784248 | -5.609141989 |
| 1434650_at   | 0.014981147  | 7.154534933 | 0.217006412  | 0.832838425 | 0.832838425 | -5.609156927 |
| 1442945_at   | -0.030861169 | 6.1866628   | -0.216984824 | 0.832854768 | 0.832854768 | -5.609161433 |
| 1444930_at   | 0.014729903  | 6.131708101 | 0.216971971  | 0.832864498 | 0.832864498 | -5.609164115 |
| 1428661_at   | -0.025434182 | 7.923868374 | -0.21694587  | 0.832884259 | 0.832884259 | -5.609169562 |
| 1452976_a_at | -0.021258258 | 6.165168983 | -0.216880361 | 0.832933855 | 0.832933855 | -5.609183229 |
| 1432521_at   | -0.018469193 | 4.095586035 | -0.216841298 | 0.832963428 | 0.832963428 | -5.609191376 |
| 1455322_at   | 0.018690756  | 8.20377174  | 0.216826943  | 0.832974297 | 0.832974297 | -5.60919437  |
| 1424881_at   | -0.022647058 | 3.745510952 | -0.216822249 | 0.832977851 | 0.832977851 | -5.609195349 |
| 1454864_at   | -0.015125981 | 6.948264605 | -0.216799137 | 0.832995348 | 0.832995348 | -5.609200168 |
| 1434210_s_at | 0.020814817  | 8.68947701  | 0.21667751   | 0.833087433 | 0.833087433 | -5.609225523 |
| 1432888_at   | 0.016074134  | 5.125456294 | 0.216643068  | 0.83311351  | 0.83311351  | -5.6092327   |
| 1446035_at   | -0.018532146 | 3.173053799 | -0.216613737 | 0.833135718 | 0.833135718 | -5.609238811 |



|              |              |             |              |             |             |              |
|--------------|--------------|-------------|--------------|-------------|-------------|--------------|
| 1456454_at   | -0.043780441 | 5.316450915 | -0.216588598 | 0.833154751 | 0.833154751 | -5.609244048 |
| 1450326_at   | -0.017328523 | 4.135260202 | -0.216588217 | 0.83315504  | 0.83315504  | -5.609244128 |
| 1435776_at   | -0.016953727 | 6.557090164 | -0.216529459 | 0.833199528 | 0.833199528 | -5.609256366 |
| 1437370_at   | 0.016705909  | 8.334699704 | 0.216528436  | 0.833200303 | 0.833200303 | -5.60925658  |
| 1426730_a_at | 0.028319645  | 4.303192485 | 0.216512627  | 0.833212272 | 0.833212272 | -5.609259872 |
| 1460525_at   | -0.022869608 | 3.431580236 | -0.216466038 | 0.833247547 | 0.833247547 | -5.609269573 |
| 1429789_at   | -0.020855539 | 4.526140255 | -0.216460293 | 0.833251897 | 0.833251897 | -5.609270769 |
| 1449994_at   | 0.021781159  | 4.659952906 | 0.216440149  | 0.83326715  | 0.83326715  | -5.609274963 |
| 1421172_at   | -0.021712095 | 9.141278584 | -0.21643254  | 0.833272911 | 0.833272911 | -5.609276547 |
| 1441158_at   | -0.01855897  | 4.780548663 | -0.21636211  | 0.833326238 | 0.833326238 | -5.609291205 |
| 1453973_s_at | 0.021665063  | 5.379497147 | 0.216301544  | 0.833372098 | 0.833372098 | -5.609303808 |
| 1421968_a_at | 0.015071757  | 8.535510222 | 0.216279754  | 0.833388597 | 0.833388597 | -5.609308341 |
| 1428694_at   | -0.019356697 | 8.63037478  | -0.216277644 | 0.833390195 | 0.833390195 | -5.60930878  |
| 1439646_at   | 0.026019511  | 3.70904278  | 0.216231174  | 0.833425382 | 0.833425382 | -5.609318446 |
| 1429757_at   | -0.016380021 | 3.396803395 | -0.216197871 | 0.833450599 | 0.833450599 | -5.609325371 |
| 1455578_x_at | -0.013778405 | 14.05981392 | -0.216143469 | 0.833491793 | 0.833491793 | -5.609336683 |
| 1433379_at   | 0.023270713  | 4.05696775  | 0.216107111  | 0.833519324 | 0.833519324 | -5.609344241 |
| 1415784_at   | 0.028740743  | 8.362446841 | 0.216067342  | 0.833549439 | 0.833549439 | -5.609352506 |
| 1430366_at   | -0.016293104 | 6.060133419 | -0.216059538 | 0.833555348 | 0.833555348 | -5.609354128 |
| 1453803_at   | -0.01695139  | 6.831293262 | -0.216054278 | 0.833559331 | 0.833559331 | -5.609355221 |
| 1417377_at   | -0.037386853 | 9.868919107 | -0.216037007 | 0.833572409 | 0.833572409 | -5.60935881  |
| 1421901_at   | 0.01591832   | 8.281477014 | 0.216022196  | 0.833583624 | 0.833583624 | -5.609361888 |
| 1454898_s_at | 0.029720844  | 7.385091408 | 0.216019594  | 0.833585595 | 0.833585595 | -5.609362428 |
| 1435989_x_at | -0.028977435 | 9.971737133 | -0.215924985 | 0.833657237 | 0.833657237 | -5.609382082 |
| 1435385_at   | -0.015850431 | 7.75083552  | -0.215917571 | 0.833662851 | 0.833662851 | -5.609383621 |
| 1447826_x_at | 0.015486855  | 6.124008364 | 0.215873774  | 0.833696017 | 0.833696017 | -5.609392716 |
| 1455289_at   | -0.019241735 | 7.800745774 | -0.215861372 | 0.833705409 | 0.833705409 | -5.609395291 |
| 1429561_at   | 0.012864046  | 7.285462871 | 0.21581688   | 0.833739102 | 0.833739102 | -5.609404528 |
| 1459305_at   | 0.014010687  | 7.040951102 | 0.215805681  | 0.833747583 | 0.833747583 | -5.609406853 |
| 1437834_s_at | -0.015608219 | 7.470268196 | -0.215792753 | 0.833757372 | 0.833757372 | -5.609409536 |
| 1439980_at   | -0.023004132 | 7.875846105 | -0.215785583 | 0.833762802 | 0.833762802 | -5.609411024 |
| 1443190_at   | 0.016378579  | 3.936010517 | 0.215644412  | 0.83386971  | 0.83386971  | -5.609440315 |
| 1418042_a_at | -0.015643248 | 9.043919125 | -0.215627866 | 0.833882241 | 0.833882241 | -5.609443747 |
| 1458360_at   | 0.018246727  | 4.509335952 | 0.215611589  | 0.833894567 | 0.833894567 | -5.609447123 |
| 1423719_at   | -0.013388423 | 3.367990397 | -0.215579408 | 0.833918939 | 0.833918939 | -5.609453797 |
| 1425768_at   | -0.017173157 | 6.921398028 | -0.215551356 | 0.833940183 | 0.833940183 | -5.609459613 |
| 1448000_at   | 0.019006637  | 3.525492264 | 0.215550711  | 0.833940671 | 0.833940671 | -5.609459747 |
| 1417156_at   | -0.031878183 | 9.278133103 | -0.215507927 | 0.833973073 | 0.833973073 | -5.609468616 |
| 1437805_at   | -0.014608461 | 3.33629045  | -0.215445981 | 0.834019987 | 0.834019987 | -5.609481455 |
| 1424588_at   | -0.022060478 | 7.851792707 | -0.215406395 | 0.834049967 | 0.834049967 | -5.609489658 |
| 1423048_a_at | 0.022462879  | 7.22116846  | 0.215397138  | 0.834056978 | 0.834056978 | -5.609491576 |
| 1425012_at   | 0.023095633  | 5.193655427 | 0.215322271  | 0.834113679 | 0.834113679 | -5.609507085 |
| 1429634_at   | -0.019515936 | 7.250504966 | -0.215291207 | 0.834137206 | 0.834137206 | -5.609513518 |
| 1454789_x_at | -0.026162464 | 7.925008905 | -0.215257321 | 0.83416287  | 0.83416287  | -5.609520535 |
| 1445440_at   | -0.01935684  | 6.679752651 | -0.215241243 | 0.834175047 | 0.834175047 | -5.609523863 |
| 1435659_a_at | -0.014872971 | 10.62127754 | -0.21519047  | 0.834213502 | 0.834213502 | -5.609534374 |
| 1442482_at   | 0.014106799  | 3.434931954 | 0.215174517  | 0.834225585 | 0.834225585 | -5.609537676 |
| 1454597_at   | -0.016567944 | 3.058024441 | -0.215166903 | 0.834231352 | 0.834231352 | -5.609539252 |
| 1422427_a_at | 0.022064035  | 3.165043995 | 0.215123277  | 0.834264394 | 0.834264394 | -5.60954828  |
| 1453004_at   | 0.018893898  | 6.675650981 | 0.215083933  | 0.834294193 | 0.834294193 | -5.609556421 |
| 1417829_a_at | -0.014829284 | 9.426917366 | -0.215072222 | 0.834303063 | 0.834303063 | -5.609558843 |
| 1449842_at   | -0.01709283  | 8.237768159 | -0.215070585 | 0.834304303 | 0.834304303 | -5.609559182 |
| 1438254_at   | -0.018481905 | 8.562715802 | -0.215040054 | 0.834327428 | 0.834327428 | -5.609565498 |

|              |              |             |              |             |             |              |
|--------------|--------------|-------------|--------------|-------------|-------------|--------------|
| 1423272_at   | 0.017448012  | 8.211794465 | 0.215036569  | 0.834330067 | 0.834330067 | -5.609566219 |
| 1446727_at   | -0.01854647  | 3.787785855 | -0.214982839 | 0.834370764 | 0.834370764 | -5.609577331 |
| 1430546_at   | -0.029576045 | 7.796624949 | -0.214891828 | 0.834439698 | 0.834439698 | -5.609596147 |
| 1425080_at   | -0.03780245  | 7.177745935 | -0.214841549 | 0.834477782 | 0.834477782 | -5.609606539 |
| 1455320_at   | 0.020120022  | 7.466283045 | 0.214840286  | 0.834478739 | 0.834478739 | -5.6096068   |
| 1447234_s_at | 0.026677197  | 9.194965376 | 0.214796935  | 0.834511575 | 0.834511575 | -5.609615758 |
| 1438772_at   | 0.022534926  | 3.980435665 | 0.214779902  | 0.834524477 | 0.834524477 | -5.609619277 |
| 1445097_at   | -0.02504462  | 4.993572578 | -0.21472874  | 0.83456323  | 0.83456323  | -5.609629845 |
| 1422583_at   | -0.019921081 | 6.247891842 | -0.214716189 | 0.834572738 | 0.834572738 | -5.609632438 |
| 1434191_at   | 0.063638241  | 4.275737718 | 0.214668474  | 0.83460888  | 0.83460888  | -5.609642292 |
| 1430000_at   | 0.027667492  | 7.369139033 | 0.21463935   | 0.834630942 | 0.834630942 | -5.609648305 |
| 1459645_at   | -0.018609401 | 3.581873881 | -0.214575771 | 0.834679102 | 0.834679102 | -5.60966143  |
| 1420237_at   | 0.015627433  | 3.996502538 | 0.214551558  | 0.834697444 | 0.834697444 | -5.609666427 |
| 1438876_at   | -0.015440364 | 4.896284662 | -0.214438443 | 0.83478313  | 0.83478313  | -5.609689766 |
| 1451726_at   | -0.017348731 | 8.191482448 | -0.214420928 | 0.834796398 | 0.834796398 | -5.609693379 |
| 1416793_at   | 0.017907344  | 8.970451924 | 0.214378993  | 0.834828165 | 0.834828165 | -5.609702027 |
| 1424586_at   | -0.015480181 | 8.825193295 | -0.214362089 | 0.83484097  | 0.83484097  | -5.609705513 |
| 1460666_a_at | -0.043957798 | 7.479409449 | -0.214338389 | 0.834858924 | 0.834858924 | -5.609710399 |
| 1445075_at   | -0.015963007 | 3.270044012 | -0.214306079 | 0.8348834   | 0.8348834   | -5.609717061 |
| 1420071_at   | -0.019906098 | 3.671937289 | -0.214285704 | 0.834898835 | 0.834898835 | -5.609721261 |
| 1427693_at   | -0.019631817 | 6.093072211 | -0.214279324 | 0.834903668 | 0.834903668 | -5.609722576 |
| 1431967_at   | 0.022028933  | 3.467319859 | 0.214225791  | 0.834944223 | 0.834944223 | -5.609733609 |
| 1416394_at   | -0.019297898 | 9.839561977 | -0.214220011 | 0.834948601 | 0.834948601 | -5.6097348   |
| 1421854_at   | 0.018245753  | 4.054337758 | 0.214189232  | 0.834971919 | 0.834971919 | -5.609741142 |
| 1430439_at   | -0.014548196 | 4.11857365  | -0.214150096 | 0.835001567 | 0.835001567 | -5.609749204 |
| 1426689_s_at | -0.014514636 | 9.848838782 | -0.214120855 | 0.835023719 | 0.835023719 | -5.609755228 |
| 1441059_at   | 0.028472473  | 4.001477803 | 0.214053689  | 0.835074604 | 0.835074604 | -5.60976906  |
| 1455602_x_at | -0.02567693  | 7.369802299 | -0.214045954 | 0.835080463 | 0.835080463 | -5.609770652 |
| 1454845_x_at | 0.015048152  | 5.958447654 | 0.213995487  | 0.835118697 | 0.835118697 | -5.609781042 |
| 1445326_at   | -0.01800296  | 5.61107835  | -0.213994393 | 0.835119526 | 0.835119526 | -5.609781268 |
| 1439491_at   | 0.016053288  | 4.514498193 | 0.2139461    | 0.835156113 | 0.835156113 | -5.609791208 |
| 1460013_at   | 0.016790963  | 8.120378419 | 0.213939419  | 0.835161174 | 0.835161174 | -5.609792583 |
| 1416440_at   | -0.015960351 | 11.59798151 | -0.213925442 | 0.835171764 | 0.835171764 | -5.609795459 |
| 1446218_at   | 0.022287422  | 4.427662924 | 0.213897441  | 0.835192978 | 0.835192978 | -5.609801221 |
| 1432675_at   | -0.021179712 | 4.508443263 | -0.213895139 | 0.835194722 | 0.835194722 | -5.609801694 |
| 1428622_at   | 0.024761462  | 5.988124948 | 0.213783322  | 0.835279438 | 0.835279438 | -5.609824695 |
| 1447138_at   | -0.025554717 | 4.679276932 | -0.213772638 | 0.835287532 | 0.835287532 | -5.609826892 |
| 1451470_s_at | 0.013659592  | 13.14776657 | 0.213708049  | 0.835336468 | 0.835336468 | -5.609840173 |
| 1443058_at   | 0.020733904  | 3.889315351 | 0.213702619  | 0.835340583 | 0.835340583 | -5.609841289 |
| 1432690_at   | -0.020300018 | 3.343227452 | -0.213696399 | 0.835345295 | 0.835345295 | -5.609842567 |
| 1452016_at   | 0.037665853  | 7.270894952 | 0.213684199  | 0.835354539 | 0.835354539 | -5.609845075 |
| 1431793_at   | 0.017289339  | 3.776701408 | 0.213678254  | 0.835359042 | 0.835359042 | -5.609846297 |
| 1440099_at   | 0.021022828  | 4.188050453 | 0.2136778    | 0.835359386 | 0.835359386 | -5.609846391 |
| 1416668_at   | 0.013693052  | 10.08161549 | 0.213531692  | 0.835470089 | 0.835470089 | -5.609876413 |
| 1455561_at   | 0.023611565  | 3.369799256 | 0.213509206  | 0.835487126 | 0.835487126 | -5.609881031 |
| 1460745_at   | 0.020808783  | 3.494262843 | 0.213441441  | 0.835538471 | 0.835538471 | -5.609894947 |
| 1417341_a_at | -0.016219382 | 8.276753384 | -0.213430967 | 0.835546407 | 0.835546407 | -5.609897098 |
| 1435307_at   | 0.020185766  | 3.380378991 | 0.213428033  | 0.83554863  | 0.83554863  | -5.6098977   |
| 1456541_x_at | 0.022224806  | 9.067633299 | 0.213401712  | 0.835568574 | 0.835568574 | -5.609903104 |
| 1422352_at   | 0.017514366  | 3.659936297 | 0.213294948  | 0.835649471 | 0.835649471 | -5.609925016 |
| 1424462_at   | -0.016699828 | 8.622026688 | -0.213223723 | 0.835703441 | 0.835703441 | -5.609939628 |
| 1451112_s_at | -0.015563263 | 11.27017109 | -0.213218787 | 0.835707181 | 0.835707181 | -5.60994064  |
| 1450080_at   | 0.01754295   | 8.221587393 | 0.213129281  | 0.835775004 | 0.835775004 | -5.609958995 |

|              |              |             |              |             |             |              |
|--------------|--------------|-------------|--------------|-------------|-------------|--------------|
| 1455540_at   | -0.014006662 | 4.066405354 | -0.213083637 | 0.835809591 | 0.835809591 | -5.609968352 |
| 1428824_at   | -0.013059384 | 8.837750232 | -0.213062009 | 0.83582598  | 0.83582598  | -5.609972785 |
| 1417907_at   | -0.01705392  | 10.40016478 | -0.212951795 | 0.835909498 | 0.835909498 | -5.60999537  |
| 1445031_at   | -0.02252624  | 5.080310837 | -0.21294884  | 0.835911737 | 0.835911737 | -5.609995975 |
| 1429855_at   | 0.018059557  | 3.166318725 | 0.212852293  | 0.8359849   | 0.8359849   | -5.610015749 |
| 1449183_at   | 0.017246466  | 8.975432093 | 0.212850912  | 0.835985947 | 0.835985947 | -5.610016031 |
| 1421934_at   | -0.01449657  | 8.864874784 | -0.212826058 | 0.836004782 | 0.836004782 | -5.61002112  |
| 1456564_at   | 0.021346997  | 6.231553171 | 0.2127661    | 0.836050219 | 0.836050219 | -5.610033394 |
| 1449934_at   | -0.015916295 | 8.441773231 | -0.212668513 | 0.836124173 | 0.836124173 | -5.610053364 |
| 1443193_at   | -0.022150265 | 5.589259575 | -0.212612272 | 0.836166795 | 0.836166795 | -5.610064869 |
| 1435995_at   | 0.016334249  | 9.959388105 | 0.212553521  | 0.836211319 | 0.836211319 | -5.610076884 |
| 1445908_at   | -0.024822948 | 4.014650611 | -0.212543344 | 0.836219033 | 0.836219033 | -5.610078965 |
| 1416079_a_at | 0.016128943  | 9.672000929 | 0.212500296  | 0.836251656 | 0.836251656 | -5.610087766 |
| 1427362_x_at | -0.017426922 | 5.511924448 | -0.212446618 | 0.836292338 | 0.836292338 | -5.610098738 |
| 1453745_at   | 0.023488945  | 8.466274188 | 0.212434919  | 0.836301204 | 0.836301204 | -5.610101129 |
| 1458482_at   | -0.013588261 | 3.822069514 | -0.212334226 | 0.836377518 | 0.836377518 | -5.610121702 |
| 1445342_at   | -0.018047134 | 3.043199563 | -0.212278734 | 0.836419576 | 0.836419576 | -5.610133036 |
| 1432923_at   | -0.018261935 | 4.167245792 | -0.21227498  | 0.836422421 | 0.836422421 | -5.610133803 |
| 1418216_at   | -0.019329482 | 5.119864847 | -0.212261809 | 0.836432404 | 0.836432404 | -5.610136492 |
| 1424569_at   | -0.014036582 | 8.289311906 | -0.212177961 | 0.836495954 | 0.836495954 | -5.610153611 |
| 1452019_at   | -0.016674121 | 4.006882847 | -0.212080091 | 0.836570133 | 0.836570133 | -5.610173584 |
| 1416916_at   | 0.016541184  | 6.613608409 | 0.212065016  | 0.836581559 | 0.836581559 | -5.610176659 |
| 1458960_at   | 0.014422186  | 4.01207673  | 0.212050982  | 0.836592196 | 0.836592196 | -5.610179523 |
| 1441006_at   | 0.023485501  | 5.721472206 | 0.21205045   | 0.836592599 | 0.836592599 | -5.610179631 |
| 1452802_at   | 0.024403869  | 3.941143836 | 0.212042621  | 0.836598533 | 0.836598533 | -5.610181228 |
| 1429120_at   | 0.021577304  | 6.375088693 | 0.212005294  | 0.836626825 | 0.836626825 | -5.610188842 |
| 1460546_at   | 0.016533928  | 4.323892286 | 0.211996499  | 0.836633491 | 0.836633491 | -5.610190636 |
| 1417861_at   | -0.019614292 | 5.490291733 | -0.211858877 | 0.836737805 | 0.836737805 | -5.610218695 |
| 1437452_x_at | -0.01688482  | 3.950270813 | -0.211835185 | 0.836755763 | 0.836755763 | -5.610223523 |
| 1435514_at   | -0.117665557 | 5.396291543 | -0.211833159 | 0.836757299 | 0.836757299 | -5.610223936 |
| 1437548_at   | 0.032228026  | 3.596901211 | 0.211732347  | 0.836833714 | 0.836833714 | -5.610244476 |
| 1444037_at   | -0.060533574 | 7.351897292 | -0.211691349 | 0.836864791 | 0.836864791 | -5.610252826 |
| 1442970_at   | 0.020136504  | 3.407871725 | 0.211655778  | 0.836891754 | 0.836891754 | -5.61026007  |
| 1456717_at   | 0.029098786  | 6.251804745 | 0.211649102  | 0.836896814 | 0.836896814 | -5.610261429 |
| 1452706_a_at | 0.018442707  | 6.983715235 | 0.211552972  | 0.836969684 | 0.836969684 | -5.610280999 |
| 1457091_at   | -0.020767503 | 3.465759952 | -0.211519567 | 0.836995006 | 0.836995006 | -5.610287797 |
| 1450642_at   | -0.021427675 | 9.014102006 | -0.211509289 | 0.837002797 | 0.837002797 | -5.610289889 |
| 1438139_at   | -0.021273321 | 7.240409305 | -0.211465558 | 0.837035947 | 0.837035947 | -5.610298787 |
| 1454522_at   | -0.018831051 | 3.740118932 | -0.211446319 | 0.837050532 | 0.837050532 | -5.6103027   |
| 1446340_at   | -0.016459582 | 3.29848457  | -0.211445103 | 0.837051453 | 0.837051453 | -5.610302948 |
| 1434046_at   | -0.016637258 | 3.852717923 | -0.21143154  | 0.837061735 | 0.837061735 | -5.610305707 |
| 1429240_at   | 0.017196141  | 8.725947442 | 0.211347143  | 0.837125713 | 0.837125713 | -5.610322871 |
| 1456659_at   | -0.01955419  | 8.254596082 | -0.2113153   | 0.837149852 | 0.837149852 | -5.610329345 |
| 1441083_at   | -0.023464144 | 4.107181782 | -0.211235204 | 0.837210572 | 0.837210572 | -5.610345625 |
| 1445971_at   | -0.017988217 | 5.435674406 | -0.211232316 | 0.837212762 | 0.837212762 | -5.610346212 |
| 1421585_at   | 0.021266916  | 3.667809512 | 0.211219258  | 0.83722266  | 0.83722266  | -5.610348866 |
| 1436814_at   | 0.018513495  | 4.092815577 | 0.21111043   | 0.837305164 | 0.837305164 | -5.610370975 |
| 1451774_at   | -0.014650971 | 4.637727915 | -0.211107936 | 0.837307055 | 0.837307055 | -5.610371482 |
| 1438297_at   | -0.018224203 | 3.51357261  | -0.211087929 | 0.837322222 | 0.837322222 | -5.610375545 |
| 1417911_at   | -0.015966303 | 10.14239796 | -0.211085034 | 0.837324417 | 0.837324417 | -5.610376133 |
| 1430688_s_at | 0.016663985  | 4.539920702 | 0.211082967  | 0.837325984 | 0.837325984 | -5.610376553 |
| 1432322_at   | -0.024477186 | 5.167147427 | -0.211046955 | 0.837353285 | 0.837353285 | -5.610383865 |
| 1420234_at   | 0.015365614  | 3.541515358 | 0.211044713  | 0.837354985 | 0.837354985 | -5.61038432  |

|              |              |             |              |             |             |              |
|--------------|--------------|-------------|--------------|-------------|-------------|--------------|
| 1459339_at   | -0.020293501 | 5.858171112 | -0.211043492 | 0.837355911 | 0.837355911 | -5.610384568 |
| 1460420_a_at | 0.013237809  | 7.649636158 | 0.211039699  | 0.837358787 | 0.837358787 | -5.610385339 |
| 1421198_at   | 0.025639007  | 7.070876724 | 0.211035041  | 0.837362318 | 0.837362318 | -5.610386284 |
| 1424286_at   | -0.013355138 | 7.716863823 | -0.211000628 | 0.837388407 | 0.837388407 | -5.610393271 |
| 1436206_at   | -0.015185578 | 8.168605306 | -0.210987781 | 0.837398147 | 0.837398147 | -5.610395879 |
| 1449924_at   | -0.017762648 | 4.091553971 | -0.210982795 | 0.837401927 | 0.837401927 | -5.610396891 |
| 1436778_at   | 0.026160697  | 4.885496453 | 0.210867679  | 0.837489202 | 0.837489202 | -5.610420251 |
| 1418795_at   | 0.016892765  | 6.975286726 | 0.210866689  | 0.837489953 | 0.837489953 | -5.610420452 |
| 1416459_at   | -0.014979169 | 7.983011862 | -0.21084403  | 0.837507131 | 0.837507131 | -5.610425049 |
| 1439266_a_at | -0.0196923   | 9.053097063 | -0.210738626 | 0.837587046 | 0.837587046 | -5.610446425 |
| 1428633_at   | 0.01818141   | 5.690541319 | 0.210732314  | 0.837591832 | 0.837591832 | -5.610447705 |
| 1439006_x_at | 0.025736326  | 6.231482672 | 0.210632676  | 0.837667376 | 0.837667376 | -5.610467901 |
| 1448283_a_at | 0.016811268  | 10.65182885 | 0.210570462  | 0.837714547 | 0.837714547 | -5.610480507 |
| 1446208_at   | 0.01968863   | 3.382072842 | 0.210507842  | 0.837762026 | 0.837762026 | -5.610493191 |
| 1417850_at   | -0.019487691 | 8.025111491 | -0.210500418 | 0.837767655 | 0.837767655 | -5.610494695 |
| 1453193_s_at | -0.023571529 | 3.966234153 | -0.210483331 | 0.837780611 | 0.837780611 | -5.610498155 |
| 1417274_at   | -0.014174645 | 10.39531002 | -0.210456241 | 0.837801152 | 0.837801152 | -5.610503641 |
| 1426804_at   | -0.016865355 | 10.30722916 | -0.210443534 | 0.837810786 | 0.837810786 | -5.610506214 |
| 1447177_at   | -0.025205257 | 4.145413014 | -0.210364659 | 0.837870593 | 0.837870593 | -5.610522181 |
| 1436750_a_at | -0.046661473 | 9.974990085 | -0.210350704 | 0.837881174 | 0.837881174 | -5.610525005 |
| 1441602_at   | -0.023633499 | 3.910476161 | -0.210332333 | 0.837895104 | 0.837895104 | -5.610528723 |
| 1456062_at   | -0.02060766  | 3.594505046 | -0.210326239 | 0.837899725 | 0.837899725 | -5.610529956 |
| 1436931_at   | 0.014356161  | 3.544280929 | 0.210301447  | 0.837918523 | 0.837918523 | -5.610534973 |
| 1428082_at   | 0.016795218  | 9.03242018  | 0.21028067   | 0.837934278 | 0.837934278 | -5.610539177 |
| 1449486_at   | -0.015873135 | 3.542669522 | -0.210260191 | 0.837949806 | 0.837949806 | -5.610543319 |
| 1452846_at   | -0.020985243 | 7.179468355 | -0.210244267 | 0.83796188  | 0.83796188  | -5.610546541 |
| 1441472_at   | 0.022506676  | 5.466994763 | 0.21011494   | 0.838059946 | 0.838059946 | -5.610572693 |
| 1439732_at   | 0.033763559  | 4.373824479 | 0.21010228   | 0.838069546 | 0.838069546 | -5.610575252 |
| 1434466_at   | 0.01412541   | 3.673928105 | 0.210099217  | 0.838071869 | 0.838071869 | -5.610575872 |
| 1445684_s_at | 0.015961761  | 11.37686817 | 0.210098642  | 0.838072305 | 0.838072305 | -5.610575988 |
| 1421466_at   | -0.030978646 | 5.276127925 | -0.210083672 | 0.838083657 | 0.838083657 | -5.610579014 |
| 1440785_at   | 0.022370651  | 3.386926126 | 0.210076489  | 0.838089103 | 0.838089103 | -5.610580466 |
| 1442176_at   | 0.019040538  | 6.822418163 | 0.210005708  | 0.838142777 | 0.838142777 | -5.61059477  |
| 1434315_at   | -0.021238881 | 6.373111985 | -0.209940638 | 0.83819212  | 0.83819212  | -5.610607915 |
| 1448642_at   | -0.013213002 | 12.22590157 | -0.209938342 | 0.838193862 | 0.838193862 | -5.610608379 |
| 1451960_a_at | -0.019102532 | 6.82899273  | -0.209916207 | 0.838210647 | 0.838210647 | -5.61061285  |
| 1431821_a_at | -0.027535283 | 6.171081193 | -0.209914955 | 0.838211596 | 0.838211596 | -5.610613103 |
| 1449711_at   | 0.015477773  | 4.352667176 | 0.209807414  | 0.838293148 | 0.838293148 | -5.610634817 |
| 1459782_x_at | 0.01742277   | 4.51534739  | 0.20977637   | 0.83831669  | 0.83831669  | -5.610641083 |
| 1436318_at   | 0.01750224   | 9.292985185 | 0.209691692  | 0.838380906 | 0.838380906 | -5.610658171 |
| 1433970_at   | 0.014064803  | 9.159989    | 0.209676949  | 0.838392087 | 0.838392087 | -5.610661145 |
| 1424672_at   | 0.026894662  | 7.03073634  | 0.209651364  | 0.83841149  | 0.83841149  | -5.610666307 |
| 1458678_at   | 0.016551983  | 4.721330318 | 0.209618354  | 0.838436524 | 0.838436524 | -5.610672965 |
| 1427491_at   | 0.022624141  | 4.859266141 | 0.209606351  | 0.838445627 | 0.838445627 | -5.610675386 |
| 1415792_at   | -0.024404745 | 8.811012859 | -0.209584901 | 0.838461894 | 0.838461894 | -5.610679711 |
| 1417615_a_at | -0.013536325 | 13.41123426 | -0.209537505 | 0.838497839 | 0.838497839 | -5.610689268 |
| 1427251_at   | 0.020580558  | 8.10791034  | 0.20951594   | 0.838514193 | 0.838514193 | -5.610693615 |
| 1424584_a_at | 0.014008082  | 8.654421049 | 0.209512935  | 0.838516472 | 0.838516472 | -5.610694221 |
| 1422972_s_at | -0.02077799  | 8.052693607 | -0.209499799 | 0.838526434 | 0.838526434 | -5.610696869 |
| 1445731_at   | 0.015979923  | 5.042661275 | 0.209492819  | 0.838531728 | 0.838531728 | -5.610698276 |
| 1450029_s_at | 0.020491363  | 6.117110756 | 0.209483827  | 0.838538548 | 0.838538548 | -5.610700088 |
| 1445018_at   | 0.013798389  | 3.855179907 | 0.209447692  | 0.838565953 | 0.838565953 | -5.610707371 |
| 1445520_at   | 0.018537507  | 3.363382182 | 0.209443068  | 0.838569459 | 0.838569459 | -5.610708303 |

|              |              |             |              |             |             |              |
|--------------|--------------|-------------|--------------|-------------|-------------|--------------|
| 1460435_at   | -0.020295311 | 7.13021886  | -0.209372033 | 0.838623333 | 0.838623333 | -5.610722615 |
| 1427614_at   | 0.019147262  | 3.477259075 | 0.209325221  | 0.838658836 | 0.838658836 | -5.610732044 |
| 1438106_at   | -0.021657385 | 4.14814159  | -0.209318162 | 0.83866419  | 0.83866419  | -5.610733466 |
| 1424991_s_at | 0.01330303   | 9.135668048 | 0.209281942  | 0.838691661 | 0.838691661 | -5.61074076  |
| 1451789_a_at | -0.016423465 | 9.669171275 | -0.20921329  | 0.838743729 | 0.838743729 | -5.610754582 |
| 1441062_at   | 0.014007336  | 6.264137344 | 0.209193886  | 0.838758446 | 0.838758446 | -5.610758488 |
| 1416712_at   | -0.013818715 | 8.562510884 | -0.209173984 | 0.838773541 | 0.838773541 | -5.610762494 |
| 1418169_at   | -0.021649422 | 8.249533597 | -0.209153674 | 0.838788945 | 0.838788945 | -5.610766581 |
| 1440302_at   | 0.018308528  | 5.789052087 | 0.209151707  | 0.838790437 | 0.838790437 | -5.610766977 |
| 1453564_a_at | 0.016642081  | 7.250435308 | 0.209128853  | 0.838807771 | 0.838807771 | -5.610771576 |
| 1424669_at   | 0.014566304  | 8.157857708 | 0.209078102  | 0.838846263 | 0.838846263 | -5.610781787 |
| 1442303_at   | 0.014700402  | 5.689008886 | 0.209043103  | 0.83887281  | 0.83887281  | -5.610788827 |
| 1443662_at   | 0.017692841  | 3.993449979 | 0.209038344  | 0.838876419 | 0.838876419 | -5.610789784 |
| 1426381_at   | -0.013468369 | 8.860192855 | -0.20898934  | 0.838913588 | 0.838913588 | -5.610799639 |
| 1426068_at   | -0.016701255 | 7.100285208 | -0.208759691 | 0.839087778 | 0.839087778 | -5.610845793 |
| 1426532_at   | -0.013172458 | 8.837911026 | -0.208759609 | 0.83908784  | 0.83908784  | -5.61084581  |
| 1457203_at   | -0.024698593 | 5.951137041 | -0.208753048 | 0.839092817 | 0.839092817 | -5.610847128 |
| 1433980_at   | -0.013195943 | 8.391514157 | -0.208724613 | 0.839114386 | 0.839114386 | -5.610852839 |
| 1441536_at   | 0.028205797  | 6.054609324 | 0.208701673  | 0.839131787 | 0.839131787 | -5.610857446 |
| 1417520_at   | -0.029918279 | 7.166225886 | -0.20866469  | 0.83915984  | 0.83915984  | -5.610864872 |
| 1419529_at   | -0.016169421 | 4.43069841  | -0.208634588 | 0.839182673 | 0.839182673 | -5.610870915 |
| 1432460_at   | -0.0207121   | 4.692202706 | -0.208623019 | 0.839191449 | 0.839191449 | -5.610873238 |
| 1434760_at   | 0.019745363  | 5.173286231 | 0.208551779  | 0.839245488 | 0.839245488 | -5.610887536 |
| 1419513_a_at | -0.026867198 | 7.920076829 | -0.208486654 | 0.839294891 | 0.839294891 | -5.610900602 |
| 1459026_at   | -0.016187413 | 5.433664184 | -0.208466109 | 0.839310475 | 0.839310475 | -5.610904724 |
| 1449959_x_at | -0.018856741 | 6.894293641 | -0.208463642 | 0.839312347 | 0.839312347 | -5.610905219 |
| 1417273_at   | -0.031655234 | 5.761498691 | -0.208432949 | 0.83933563  | 0.83933563  | -5.610911375 |
| 1440223_at   | 0.01625069   | 9.02832321  | 0.208419437  | 0.83934588  | 0.83934588  | -5.610914085 |
| 1422802_at   | -0.012877795 | 5.499675299 | -0.20841405  | 0.839349967 | 0.839349967 | -5.610915165 |
| 1435466_at   | 0.026119657  | 6.044437303 | 0.208394967  | 0.839364443 | 0.839364443 | -5.610918992 |
| 1431133_at   | 0.018574947  | 5.979553282 | 0.208381741  | 0.839374476 | 0.839374476 | -5.610921644 |
| 1427287_s_at | 0.028496198  | 5.491179594 | 0.208380166  | 0.83937567  | 0.83937567  | -5.610921959 |
| 1449762_at   | -0.018067815 | 5.124609411 | -0.208371247 | 0.839382436 | 0.839382436 | -5.610923748 |
| 1437965_at   | 0.018110688  | 6.963866856 | 0.208366966  | 0.839385684 | 0.839385684 | -5.610924606 |
| 1439340_at   | 0.015854459  | 4.034105211 | 0.208272926  | 0.839457023 | 0.839457023 | -5.610943456 |
| 1436974_at   | -0.017728081 | 3.997073084 | -0.208241256 | 0.839481048 | 0.839481048 | -5.610949803 |
| 1434456_at   | -0.038431225 | 6.770051718 | -0.20821452  | 0.839501331 | 0.839501331 | -5.610955159 |
| 1424654_at   | -0.013808259 | 8.160648639 | -0.208134509 | 0.83956203  | 0.83956203  | -5.610971186 |
| 1448969_at   | 0.016478462  | 6.80833804  | 0.208118146  | 0.839574443 | 0.839574443 | -5.610974463 |
| 1438208_at   | -0.022385211 | 6.997845983 | -0.20810639  | 0.839583362 | 0.839583362 | -5.610976818 |
| 1425431_at   | 0.016955039  | 3.159616453 | 0.208088043  | 0.83959728  | 0.83959728  | -5.610980491 |
| 1431603_at   | -0.016391737 | 4.048616217 | -0.208071196 | 0.839610061 | 0.839610061 | -5.610983864 |
| 1432496_at   | -0.021916373 | 4.467792901 | -0.20806033  | 0.839618305 | 0.839618305 | -5.61098604  |
| 1459163_at   | -0.01738588  | 3.925032728 | -0.20805328  | 0.839623653 | 0.839623653 | -5.610987451 |
| 1422692_at   | 0.048681991  | 8.282364587 | 0.208040101  | 0.839633651 | 0.839633651 | -5.610990089 |
| 1434868_at   | -0.01886292  | 4.35512279  | -0.208035654 | 0.839637025 | 0.839637025 | -5.61099098  |
| 1446305_at   | -0.018844234 | 3.745406532 | -0.208030965 | 0.839640582 | 0.839640582 | -5.610991918 |
| 1440469_at   | 0.013003298  | 4.522063994 | 0.208002073  | 0.839662502 | 0.839662502 | -5.610997701 |
| 1438795_x_at | 0.01390747   | 3.178965259 | 0.20797552   | 0.839682646 | 0.839682646 | -5.611003016 |
| 1453414_at   | -0.019552438 | 3.911172819 | -0.207950635 | 0.839701526 | 0.839701526 | -5.611007995 |
| 1441477_at   | 0.019806014  | 7.855591055 | 0.20792494   | 0.839721019 | 0.839721019 | -5.611013136 |
| 1421463_at   | 0.012964497  | 4.878153539 | 0.207908206  | 0.839733715 | 0.839733715 | -5.611016484 |
| 1446758_at   | -0.025518516 | 5.323793416 | -0.207897783 | 0.839741623 | 0.839741623 | -5.611018569 |

|              |              |             |              |             |             |              |
|--------------|--------------|-------------|--------------|-------------|-------------|--------------|
| 1418385_at   | -0.013113781 | 5.239595709 | -0.207828667 | 0.83979406  | 0.83979406  | -5.611032394 |
| 1421948_a_at | -0.019167599 | 8.196939594 | -0.207825896 | 0.839796162 | 0.839796162 | -5.611032948 |
| 1433135_at   | 0.015190111  | 4.167267819 | 0.207790969  | 0.839822661 | 0.839822661 | -5.611039932 |
| 1429085_at   | 0.014083688  | 10.40792032 | 0.207756401  | 0.839848888 | 0.839848888 | -5.611046843 |
| 1446119_at   | -0.013061063 | 3.747096902 | -0.207728668 | 0.839869929 | 0.839869929 | -5.611052387 |
| 1421688_a_at | -0.017745465 | 4.688536018 | -0.207718413 | 0.839877709 | 0.839877709 | -5.611054437 |
| 1437904_at   | 0.016511048  | 9.182782479 | 0.207681552  | 0.839905676 | 0.839905676 | -5.611061804 |
| 1451891_a_at | 0.018301357  | 6.284411884 | 0.207668609  | 0.839915496 | 0.839915496 | -5.61106439  |
| 1420247_at   | -0.014845552 | 4.980558127 | -0.207649811 | 0.839929759 | 0.839929759 | -5.611068146 |
| 1420368_at   | 0.013727017  | 10.22287977 | 0.207629703  | 0.839945015 | 0.839945015 | -5.611072164 |
| 1415931_at   | -0.034959586 | 7.6861198   | -0.207589794 | 0.839975295 | 0.839975295 | -5.611080137 |
| 1437123_at   | -0.019411231 | 7.057068644 | -0.207499118 | 0.840044094 | 0.840044094 | -5.611098245 |
| 1442746_at   | 0.018783647  | 5.118065744 | 0.207471794  | 0.840064827 | 0.840064827 | -5.611103701 |
| 1449332_at   | 0.02139222   | 4.014073017 | 0.20742277   | 0.840102024 | 0.840102024 | -5.611113487 |
| 1432297_at   | 0.022713679  | 3.905239002 | 0.207421013  | 0.840103357 | 0.840103357 | -5.611113838 |
| 1419790_at   | -0.017897582 | 4.042537866 | -0.207392776 | 0.840124782 | 0.840124782 | -5.611119473 |
| 1416311_s_at | 0.019512105  | 7.187148577 | 0.207392331  | 0.840125119 | 0.840125119 | -5.611119562 |
| 1424455_at   | 0.016230558  | 10.58614439 | 0.207390557  | 0.840126465 | 0.840126465 | -5.611119916 |
| 1451226_at   | -0.024029477 | 8.447335117 | -0.207383449 | 0.840131859 | 0.840131859 | -5.611121335 |
| 1433096_at   | -0.023662265 | 4.055261867 | -0.207352445 | 0.840155384 | 0.840155384 | -5.611127521 |
| 1436753_at   | 0.019013105  | 8.077075393 | 0.207348265  | 0.840158555 | 0.840158555 | -5.611128355 |
| 1447684_at   | 0.017057138  | 4.764356294 | 0.207319542  | 0.84018035  | 0.84018035  | -5.611134086 |
| 1440813_s_at | -0.014866125 | 6.381502202 | -0.207287946 | 0.840204324 | 0.840204324 | -5.611140388 |
| 1445422_at   | 0.028047139  | 4.305172089 | 0.207267033  | 0.840220193 | 0.840220193 | -5.61114456  |
| 1453601_at   | 0.017011199  | 7.045630635 | 0.207240193  | 0.840240558 | 0.840240558 | -5.611149912 |
| 1445333_at   | 0.018963786  | 3.530469294 | 0.207233345  | 0.840245755 | 0.840245755 | -5.611151278 |
| 1422763_at   | -0.015549098 | 8.685598639 | -0.207210315 | 0.84026323  | 0.84026323  | -5.61115587  |
| 1452235_at   | -0.022165948 | 7.342233338 | -0.207208939 | 0.840264274 | 0.840264274 | -5.611156145 |
| 1429664_at   | -0.024000667 | 4.743238022 | -0.207188554 | 0.840279742 | 0.840279742 | -5.611160209 |
| 1459493_at   | 0.024861856  | 7.03524631  | 0.20717993   | 0.840286285 | 0.840286285 | -5.611161928 |
| 1429045_at   | 0.017534329  | 9.281739528 | 0.207151875  | 0.840307574 | 0.840307574 | -5.611167521 |
| 1438791_at   | -0.016244377 | 3.093873911 | -0.207127709 | 0.840325911 | 0.840325911 | -5.611172338 |
| 1438823_at   | -0.013766104 | 4.591712427 | -0.207125472 | 0.840327609 | 0.840327609 | -5.611172784 |
| 1441011_at   | 0.019714577  | 3.235346391 | 0.207046229  | 0.84038774  | 0.84038774  | -5.611188575 |
| 1434695_at   | 0.017621092  | 8.933280976 | 0.207043142  | 0.840390082 | 0.840390082 | -5.61118919  |
| 1443400_at   | 0.017997179  | 7.527136141 | 0.207040834  | 0.840391834 | 0.840391834 | -5.61118965  |
| 1446815_at   | -0.0180708   | 6.169961243 | -0.207030193 | 0.840399908 | 0.840399908 | -5.61119177  |
| 1449720_at   | -0.01549496  | 3.807400609 | -0.207009596 | 0.840415538 | 0.840415538 | -5.611195873 |
| 1437417_s_at | -0.017379565 | 9.85816209  | -0.206981387 | 0.840436944 | 0.840436944 | -5.611201492 |
| 1436562_at   | -0.017730574 | 6.601387038 | -0.206960344 | 0.840452912 | 0.840452912 | -5.611205683 |
| 1446665_at   | -0.018714682 | 3.481345477 | -0.20690596  | 0.840494181 | 0.840494181 | -5.611216512 |
| 1446037_at   | -0.015348767 | 3.311505446 | -0.206838736 | 0.840545194 | 0.840545194 | -5.611229895 |
| 1426750_at   | 0.017845331  | 8.597879086 | 0.206825258  | 0.840555422 | 0.840555422 | -5.611232577 |
| 1438128_at   | -0.017807498 | 3.646012068 | -0.206814022 | 0.840563949 | 0.840563949 | -5.611234813 |
| 1454267_a_at | -0.019276647 | 4.285523857 | -0.206805194 | 0.840570648 | 0.840570648 | -5.61123657  |
| 1426593_a_at | 0.025567198  | 9.304873843 | 0.206798843  | 0.840575468 | 0.840575468 | -5.611237834 |
| 1424129_at   | -0.018218323 | 8.686868985 | -0.206788838 | 0.84058306  | 0.84058306  | -5.611239825 |
| 1456808_at   | -0.016013144 | 7.376028342 | -0.206763672 | 0.840602158 | 0.840602158 | -5.611244833 |
| 1453744_a_at | -0.022231042 | 7.155505621 | -0.206757404 | 0.840606914 | 0.840606914 | -5.61124608  |
| 1432098_a_at | 0.016740862  | 5.062039969 | 0.206675276  | 0.840669239 | 0.840669239 | -5.611262417 |
| 1430340_at   | 0.017146082  | 4.873682655 | 0.206668061  | 0.840674715 | 0.840674715 | -5.611263852 |
| 1423206_s_at | 0.014218547  | 10.54085474 | 0.206661343  | 0.840679813 | 0.840679813 | -5.611265188 |
| 1443382_s_at | -0.012320471 | 6.643951966 | -0.206660427 | 0.840680508 | 0.840680508 | -5.61126537  |

|              |              |             |              |             |             |              |
|--------------|--------------|-------------|--------------|-------------|-------------|--------------|
| 1431680_a_at | -0.029763121 | 7.035968208 | -0.20665783  | 0.840682479 | 0.840682479 | -5.611265886 |
| 1424146_at   | -0.015976336 | 4.516631394 | -0.206647901 | 0.840690015 | 0.840690015 | -5.611267861 |
| 1434462_at   | -0.024957825 | 8.666708742 | -0.206628239 | 0.840704936 | 0.840704936 | -5.61127177  |
| 1434245_a_at | -0.019782932 | 8.043987275 | -0.206617074 | 0.840713409 | 0.840713409 | -5.61127399  |
| 1426614_at   | 0.017360533  | 10.20365951 | 0.206616578  | 0.840713785 | 0.840713785 | -5.611274089 |
| 1441471_at   | -0.020168996 | 4.770226313 | -0.206592511 | 0.84073205  | 0.84073205  | -5.611278874 |
| 1436427_at   | 0.017217218  | 8.505878231 | 0.206555702  | 0.840759985 | 0.840759985 | -5.611286191 |
| 1418266_at   | 0.022787071  | 3.951107707 | 0.206554156  | 0.840761157 | 0.840761157 | -5.611286498 |
| 1427045_at   | -0.021178299 | 4.831886051 | -0.206518585 | 0.840788153 | 0.840788153 | -5.611293568 |
| 1443788_at   | 0.016553509  | 3.229663819 | 0.206479644  | 0.840817706 | 0.840817706 | -5.611301306 |
| 1426957_at   | -0.015954365 | 9.650993671 | -0.206470376 | 0.84082474  | 0.84082474  | -5.611303148 |
| 1420924_at   | -0.025451351 | 9.115008031 | -0.206416977 | 0.840865266 | 0.840865266 | -5.611313756 |
| 1457785_at   | -0.020241904 | 4.624704008 | -0.206332518 | 0.840929365 | 0.840929365 | -5.611330529 |
| 1447555_at   | -0.018964195 | 6.205297037 | -0.206319317 | 0.840939384 | 0.840939384 | -5.611333151 |
| 1442111_at   | -0.018590333 | 8.401242726 | -0.206269555 | 0.840977151 | 0.840977151 | -5.611343029 |
| 1436766_at   | 0.015013934  | 10.69686299 | 0.206268426  | 0.840978008 | 0.840978008 | -5.611343253 |
| 1433493_at   | 0.01667988   | 6.985285878 | 0.206228803  | 0.84100808  | 0.84100808  | -5.611351118 |
| 1417030_at   | 0.024795408  | 5.550245044 | 0.206223624  | 0.841012011 | 0.841012011 | -5.611352145 |
| 1417362_at   | -0.01557042  | 4.703615487 | -0.206180941 | 0.841044406 | 0.841044406 | -5.611360615 |
| 1421349_x_at | 0.016912425  | 3.788147726 | 0.206131183  | 0.841082171 | 0.841082171 | -5.611370486 |
| 1420363_at   | -0.013926812 | 5.621266722 | -0.206129095 | 0.841083756 | 0.841083756 | -5.611370901 |
| 1425902_a_at | 0.021966417  | 6.787134396 | 0.206075175  | 0.841124681 | 0.841124681 | -5.611381595 |
| 1435999_at   | -0.01647648  | 4.403802587 | -0.206040057 | 0.841151335 | 0.841151335 | -5.611388559 |
| 1451644_a_at | 0.018666705  | 3.431735922 | 0.205986027  | 0.841192344 | 0.841192344 | -5.61139927  |
| 1428093_at   | -0.01879795  | 7.644678578 | -0.205977226 | 0.841199023 | 0.841199023 | -5.611401015 |
| 1435220_s_at | -0.012781203 | 8.449383266 | -0.205900187 | 0.841257498 | 0.841257498 | -5.611416282 |
| 1452156_a_at | 0.013825913  | 11.92155191 | 0.205864314  | 0.841284726 | 0.841284726 | -5.61142339  |
| 1427864_at   | 0.016652753  | 4.254331105 | 0.205840697  | 0.841302652 | 0.841302652 | -5.611428068 |
| 1445167_at   | -0.018214811 | 3.730514821 | -0.205834705 | 0.841307201 | 0.841307201 | -5.611429255 |
| 1429034_at   | 0.01773978   | 5.565999214 | 0.205823728  | 0.841315532 | 0.841315532 | -5.611431429 |
| 1434621_at   | -0.017516904 | 7.22238268  | -0.205819838 | 0.841318485 | 0.841318485 | -5.6114322   |
| 1451700_a_at | -0.013838148 | 8.683674536 | -0.205815344 | 0.841321896 | 0.841321896 | -5.61143309  |
| 1444345_at   | 0.021726292  | 8.226062255 | 0.205785571  | 0.841344495 | 0.841344495 | -5.611438987 |
| 1450350_a_at | -0.019508279 | 8.180331216 | -0.205779819 | 0.841348861 | 0.841348861 | -5.611440126 |
| 1431559_at   | -0.020679883 | 3.500829972 | -0.205773417 | 0.84135372  | 0.84135372  | -5.611441393 |
| 1417472_at   | 0.022099648  | 9.170972465 | 0.205754551  | 0.84136804  | 0.84136804  | -5.611445129 |
| 1429287_a_at | -0.026311683 | 4.448076597 | -0.205744679 | 0.841375534 | 0.841375534 | -5.611447084 |
| 1436618_at   | 0.017848873  | 5.650761431 | 0.205744011  | 0.84137604  | 0.84137604  | -5.611447216 |
| 1420927_at   | 0.02612329   | 6.670167101 | 0.205730583  | 0.841386233 | 0.841386233 | -5.611449875 |
| 1443322_at   | 0.025374457  | 3.546056912 | 0.205701649  | 0.841408196 | 0.841408196 | -5.611455603 |
| 1451627_a_at | 0.02394784   | 4.73849209  | 0.205693569  | 0.841414328 | 0.841414328 | -5.611457202 |
| 1416269_at   | 0.01481735   | 11.41166532 | 0.205688248  | 0.841418368 | 0.841418368 | -5.611458256 |
| 1458971_at   | 0.013183106  | 6.023101987 | 0.205684157  | 0.841421473 | 0.841421473 | -5.611459065 |
| 1449684_at   | 0.01667629   | 3.511961924 | 0.205677982  | 0.84142616  | 0.84142616  | -5.611460288 |
| 1418164_at   | 0.01303988   | 8.484933754 | 0.2056677    | 0.841433965 | 0.841433965 | -5.611462323 |
| 1451272_a_at | 0.018689274  | 8.725857509 | 0.205667062  | 0.841434449 | 0.841434449 | -5.611462449 |
| 1444264_at   | -0.014720891 | 5.188754212 | -0.205650267 | 0.841447198 | 0.841447198 | -5.611465773 |
| 1449062_at   | 0.013923374  | 6.687512533 | 0.205604805  | 0.841481706 | 0.841481706 | -5.611474769 |
| 1454568_at   | 0.017443758  | 3.887559869 | 0.205557895  | 0.841517314 | 0.841517314 | -5.61148405  |
| 1437475_at   | 0.024789491  | 6.175544297 | 0.205537648  | 0.841532684 | 0.841532684 | -5.611488055 |
| 1453067_at   | -0.014665734 | 7.03174723  | -0.205512598 | 0.841551699 | 0.841551699 | -5.61149301  |
| 1435509_x_at | 0.015229395  | 12.4424804  | 0.205511357  | 0.841552641 | 0.841552641 | -5.611493255 |
| 1437117_at   | -0.017081526 | 6.015517431 | -0.205502618 | 0.841559275 | 0.841559275 | -5.611494983 |

|              |              |             |              |             |             |              |
|--------------|--------------|-------------|--------------|-------------|-------------|--------------|
| 1423246_at   | 0.014173518  | 7.875253812 | 0.205491776  | 0.841567505 | 0.841567505 | -5.611497127 |
| 1425882_at   | 0.018325196  | 5.921069462 | 0.205472345  | 0.841582255 | 0.841582255 | -5.61150097  |
| 1453936_at   | -0.016823449 | 5.206396822 | -0.205449518 | 0.841599582 | 0.841599582 | -5.611505483 |
| 1417945_at   | 0.01913864   | 4.531035751 | 0.205430644  | 0.84161391  | 0.84161391  | -5.611509215 |
| 1420056_s_at | 0.015122467  | 8.627832937 | 0.205408027  | 0.841631078 | 0.841631078 | -5.611513686 |
| 1458839_at   | 0.018837594  | 4.831752536 | 0.205388841  | 0.841645643 | 0.841645643 | -5.611517478 |
| 1431075_a_at | -0.013870582 | 9.573289626 | -0.205320785 | 0.841697305 | 0.841697305 | -5.611530928 |
| 1455911_x_at | 0.017524608  | 11.85854822 | 0.205310109  | 0.841705409 | 0.841705409 | -5.611533037 |
| 1456768_a_at | -0.022380376 | 8.011404063 | -0.205305603 | 0.84170883  | 0.84170883  | -5.611533928 |
| 1443408_at   | -0.013085513 | 3.857588038 | -0.205302848 | 0.841710921 | 0.841710921 | -5.611534472 |
| 1430908_at   | 0.019879996  | 3.459565239 | 0.205285756  | 0.841723897 | 0.841723897 | -5.611537849 |
| 1451693_a_at | 0.03084908   | 6.104426299 | 0.205281755  | 0.841726934 | 0.841726934 | -5.611538639 |
| 1426557_at   | -0.015222243 | 6.155939717 | -0.205226924 | 0.841768558 | 0.841768558 | -5.61154947  |
| 1430255_at   | 0.012551781  | 3.844618697 | 0.205210063  | 0.841781357 | 0.841781357 | -5.6115528   |
| 1429246_a_at | 0.021996407  | 9.672446896 | 0.20515424   | 0.841823736 | 0.841823736 | -5.611563823 |
| 1454356_at   | 0.020328327  | 4.009174243 | 0.205137151  | 0.841836708 | 0.841836708 | -5.611567196 |
| 1454888_at   | 0.015540857  | 9.492049478 | 0.205084245  | 0.841876873 | 0.841876873 | -5.61157764  |
| 1437595_at   | -0.020463781 | 5.453487834 | -0.205080435 | 0.841879765 | 0.841879765 | -5.611578392 |
| 1448801_a_at | -0.01475598  | 9.607350218 | -0.205079556 | 0.841880433 | 0.841880433 | -5.611578565 |
| 1448373_at   | 0.014874282  | 9.594000527 | 0.20505802   | 0.841896782 | 0.841896782 | -5.611582815 |
| 1451141_at   | -0.016421296 | 6.70391037  | -0.20500156  | 0.841939645 | 0.841939645 | -5.611593956 |
| 1427544_a_at | -0.05260778  | 7.503592811 | -0.204988501 | 0.841949559 | 0.841949559 | -5.611596532 |
| 1448248_at   | 0.017784658  | 10.36480122 | 0.204984881  | 0.841952307 | 0.841952307 | -5.611597246 |
| 1433662_s_at | 0.016831582  | 11.28471858 | 0.204923177  | 0.841999152 | 0.841999152 | -5.611609417 |
| 1421988_at   | 0.013794299  | 3.323187215 | 0.204918875  | 0.842002418 | 0.842002418 | -5.611610265 |
| 1418428_at   | -0.031773065 | 7.926473523 | -0.204915315 | 0.842005121 | 0.842005121 | -5.611610967 |
| 1425778_at   | 0.016975748  | 3.989766741 | 0.204910006  | 0.842009151 | 0.842009151 | -5.611612014 |
| 1420305_at   | -0.016586871 | 3.129399303 | -0.204885984 | 0.842027388 | 0.842027388 | -5.611616751 |
| 1447040_at   | 0.020543637  | 8.384298356 | 0.204824264  | 0.842074246 | 0.842074246 | -5.611628919 |
| 1425358_at   | 0.012598277  | 7.613067314 | 0.204812318  | 0.842083316 | 0.842083316 | -5.611631274 |
| 1428331_at   | 0.013874868  | 9.010808553 | 0.204793533  | 0.842097577 | 0.842097577 | -5.611634976 |
| 1431152_at   | -0.025267507 | 5.985193902 | -0.204775444 | 0.842111311 | 0.842111311 | -5.611638541 |
| 1429187_at   | -0.015639524 | 9.237859997 | -0.204764452 | 0.842119656 | 0.842119656 | -5.611640708 |
| 1434764_at   | 0.013029338  | 10.27530094 | 0.204754211  | 0.842127431 | 0.842127431 | -5.611642726 |
| 1428883_at   | -0.013424036 | 9.493255203 | -0.204737082 | 0.842140436 | 0.842140436 | -5.611646101 |
| 1428692_at   | 0.075704727  | 7.803475775 | 0.20471287   | 0.842158818 | 0.842158818 | -5.611650871 |
| 1431876_at   | -0.013842331 | 3.744156209 | -0.204666066 | 0.842194353 | 0.842194353 | -5.611660091 |
| 1450840_a_at | 0.016589612  | 13.86266083 | 0.204618601  | 0.842230391 | 0.842230391 | -5.611669439 |
| 1416310_at   | 0.031285205  | 5.00048102  | 0.204617665  | 0.842231101 | 0.842231101 | -5.611669623 |
| 1446266_at   | 0.022939152  | 3.640545306 | 0.204607257  | 0.842239004 | 0.842239004 | -5.611671673 |
| 1437768_at   | -0.016441653 | 6.647663401 | -0.20452407  | 0.842302163 | 0.842302163 | -5.61168805  |
| 1450155_at   | 0.030939926  | 4.330661427 | 0.204497229  | 0.842322542 | 0.842322542 | -5.611693333 |
| 1442471_at   | 0.012759979  | 7.335323351 | 0.204493637  | 0.84232527  | 0.84232527  | -5.61169404  |
| 1425113_x_at | -0.018407465 | 8.232261852 | -0.20447706  | 0.842337856 | 0.842337856 | -5.611697302 |
| 1446671_at   | 0.01722936   | 3.582836987 | 0.204465016  | 0.842347001 | 0.842347001 | -5.611699673 |
| 1418899_at   | -0.017436834 | 9.175034013 | -0.204461669 | 0.842349542 | 0.842349542 | -5.611700331 |
| 1438705_at   | 0.030408173  | 6.453342082 | 0.204405154  | 0.842392453 | 0.842392453 | -5.61171145  |
| 1431888_s_at | 0.017786249  | 3.742272191 | 0.204393391  | 0.842401384 | 0.842401384 | -5.611713764 |
| 1430109_at   | -0.017418866 | 6.721306451 | -0.20427434  | 0.842491778 | 0.842491778 | -5.611737176 |
| 1425587_a_at | 0.01593986   | 3.514709263 | 0.204240056  | 0.84251781  | 0.84251781  | -5.611743915 |
| 1444266_at   | -0.014850499 | 3.870132099 | -0.204198104 | 0.842549665 | 0.842549665 | -5.611752161 |
| 1439239_at   | 0.018431667  | 4.128260283 | 0.204188078  | 0.842557278 | 0.842557278 | -5.611754131 |
| 1460585_x_at | -0.015419427 | 9.562291887 | -0.204167144 | 0.842573173 | 0.842573173 | -5.611758245 |



|              |              |             |              |             |             |              |
|--------------|--------------|-------------|--------------|-------------|-------------|--------------|
| 1448787_at   | -0.015425273 | 9.362818748 | -0.204161533 | 0.842577434 | 0.842577434 | -5.611759347 |
| 1446389_at   | -0.020571196 | 4.515406526 | -0.204112025 | 0.842615026 | 0.842615026 | -5.611769074 |
| 1451162_at   | -0.014286239 | 10.79462491 | -0.204048432 | 0.842663315 | 0.842663315 | -5.611781564 |
| 1456168_at   | -0.016037479 | 3.631285672 | -0.204032774 | 0.842675204 | 0.842675204 | -5.611784639 |
| 1441315_s_at | 0.034976461  | 6.182018055 | 0.204018164  | 0.842686298 | 0.842686298 | -5.611787508 |
| 1460279_a_at | -0.023147734 | 9.746953109 | -0.203998831 | 0.842700979 | 0.842700979 | -5.611791304 |
| 1421730_at   | 0.019067854  | 3.958382452 | 0.203885098  | 0.842787343 | 0.842787343 | -5.611813627 |
| 1435751_at   | 0.031775173  | 6.759311967 | 0.203873891  | 0.842795853 | 0.842795853 | -5.611815826 |
| 1430518_at   | 0.016381588  | 3.475998497 | 0.203806827  | 0.842846779 | 0.842846779 | -5.611828983 |
| 1449955_at   | -0.013018425 | 5.28778209  | -0.203766583 | 0.84287734  | 0.84287734  | -5.611836876 |
| 1457952_at   | -0.013804201 | 5.570340548 | -0.203753692 | 0.84288713  | 0.84288713  | -5.611839404 |
| 1428367_at   | -0.013773922 | 8.658463104 | -0.203686995 | 0.842937779 | 0.842937779 | -5.611852481 |
| 1416783_at   | 0.04949228   | 7.234439347 | 0.20367567   | 0.842946379 | 0.842946379 | -5.611854701 |
| 1418002_at   | 0.014334248  | 10.87110579 | 0.203648521  | 0.842966996 | 0.842966996 | -5.611860022 |
| 1434514_at   | -0.014131811 | 7.915262439 | -0.203597575 | 0.843005685 | 0.843005685 | -5.611870006 |
| 1430684_s_at | -0.018261976 | 3.61335316  | -0.203523817 | 0.843061699 | 0.843061699 | -5.611884457 |
| 1433739_at   | 0.020830011  | 5.3899105   | 0.203505428  | 0.843075664 | 0.843075664 | -5.611888059 |
| 1459767_x_at | 0.017908126  | 3.896298894 | 0.203478714  | 0.843095952 | 0.843095952 | -5.611893291 |
| 1453899_at   | -0.024100928 | 5.804512378 | -0.203477197 | 0.843097103 | 0.843097103 | -5.611893588 |
| 1419964_s_at | 0.035709938  | 9.905311787 | 0.203455787  | 0.843113363 | 0.843113363 | -5.61189778  |
| 1458583_at   | -0.016698841 | 4.409574603 | -0.203446055 | 0.843120754 | 0.843120754 | -5.611899686 |
| 1426876_at   | 0.023007044  | 3.606474368 | 0.203370305  | 0.843178282 | 0.843178282 | -5.611914516 |
| 1441199_at   | -0.020330653 | 5.418941352 | -0.203364286 | 0.843182853 | 0.843182853 | -5.611915694 |
| 1425400_a_at | -0.017001528 | 4.249566869 | -0.203360828 | 0.843185479 | 0.843185479 | -5.61191637  |
| 1438304_at   | 0.0224244    | 4.625310881 | 0.203350962  | 0.843192972 | 0.843192972 | -5.611918301 |
| 1442770_at   | 0.022191879  | 3.363631209 | 0.203284266  | 0.843243626 | 0.843243626 | -5.611931353 |
| 1456716_s_at | -0.01389422  | 7.290610409 | -0.203258205 | 0.843263418 | 0.843263418 | -5.611936451 |
| 1451187_at   | 0.015189483  | 10.09266808 | 0.203191046  | 0.843314424 | 0.843314424 | -5.611949587 |
| 1418234_s_at | 0.016373635  | 9.494779108 | 0.203173128  | 0.843328033 | 0.843328033 | -5.611953091 |
| 1434057_at   | 0.012960372  | 10.93655815 | 0.203150924  | 0.843344896 | 0.843344896 | -5.611957433 |
| 1449436_s_at | 0.0154946    | 14.20783383 | 0.203119321  | 0.843368898 | 0.843368898 | -5.611963612 |
| 1430116_at   | 0.014260099  | 3.728749221 | 0.203114271  | 0.843372734 | 0.843372734 | -5.611964599 |
| 1450056_at   | 0.014753117  | 7.21207656  | 0.203091965  | 0.843389675 | 0.843389675 | -5.611968959 |
| 1435296_at   | -0.014537441 | 4.210186372 | -0.203016347 | 0.843447108 | 0.843447108 | -5.611983738 |
| 1419566_at   | -0.013034165 | 5.765759952 | -0.203014863 | 0.843448235 | 0.843448235 | -5.611984027 |
| 1459179_at   | -0.017009776 | 3.643066193 | -0.202951138 | 0.843496636 | 0.843496636 | -5.611996477 |
| 1450131_a_at | 0.016853422  | 5.902363491 | 0.202947239  | 0.843499597 | 0.843499597 | -5.611997239 |
| 1420251_at   | -0.01378933  | 3.237953588 | -0.20294002  | 0.84350508  | 0.84350508  | -5.611998649 |
| 1426353_at   | 0.014979617  | 7.938588838 | 0.202936001  | 0.843508133 | 0.843508133 | -5.611999434 |
| 1441154_at   | -0.014897482 | 4.297411681 | -0.202883893 | 0.84354771  | 0.84354771  | -5.61200961  |
| 1446524_at   | -0.017932568 | 5.589002077 | -0.20278674  | 0.843621502 | 0.843621502 | -5.612028577 |
| 1455792_x_at | -0.020635392 | 11.3468217  | -0.202779631 | 0.843626902 | 0.843626902 | -5.612029964 |
| 1460124_at   | 0.016801906  | 5.787348761 | 0.2027768    | 0.843629053 | 0.843629053 | -5.612030517 |
| 1439536_at   | -0.020988146 | 4.955868494 | -0.202760152 | 0.843641697 | 0.843641697 | -5.612033766 |
| 1439796_at   | 0.013100943  | 3.151504131 | 0.202758993  | 0.843642578 | 0.843642578 | -5.612033992 |
| 1456804_at   | -0.020414342 | 4.519073721 | -0.202753507 | 0.843646745 | 0.843646745 | -5.612035063 |
| 1437786_at   | -0.014545365 | 3.534578862 | -0.202710323 | 0.843679546 | 0.843679546 | -5.612043489 |
| 1437326_x_at | -0.020649719 | 3.726662266 | -0.202670933 | 0.843709465 | 0.843709465 | -5.612051173 |
| 1426518_at   | 0.024607424  | 8.48854104  | 0.202646654  | 0.843727907 | 0.843727907 | -5.612055909 |
| 1444620_at   | 0.049408465  | 6.009528117 | 0.202640668  | 0.843732454 | 0.843732454 | -5.612057077 |
| 1450879_at   | -0.016356504 | 8.561146503 | -0.202580935 | 0.843777826 | 0.843777826 | -5.612068725 |
| 1431725_at   | -0.023613842 | 5.505068726 | -0.202569801 | 0.843786283 | 0.843786283 | -5.612070896 |
| 1440005_at   | -0.014969494 | 3.534347312 | -0.202545765 | 0.843804541 | 0.843804541 | -5.612075582 |

|              |              |             |              |             |             |              |
|--------------|--------------|-------------|--------------|-------------|-------------|--------------|
| 1434660_at   | -0.014943208 | 9.040477592 | -0.202540886 | 0.843808247 | 0.843808247 | -5.612076533 |
| 1438769_a_at | 0.021744217  | 7.642206434 | 0.20246775   | 0.843863802 | 0.843863802 | -5.612090788 |
| 1419076_a_at | -0.013538872 | 8.304841953 | -0.202451442 | 0.843876189 | 0.843876189 | -5.612093966 |
| 1451469_at   | -0.015583615 | 8.777035215 | -0.202437938 | 0.843886447 | 0.843886447 | -5.612096597 |
| 1438848_at   | 0.026788199  | 5.504112    | 0.202384923  | 0.843926718 | 0.843926718 | -5.612106926 |
| 1450718_at   | -0.036086934 | 4.873916199 | -0.202373714 | 0.843935233 | 0.843935233 | -5.612109109 |
| 1421135_a_at | -0.012472659 | 9.005716589 | -0.202371248 | 0.843937106 | 0.843937106 | -5.612109589 |
| 1454514_at   | 0.014581279  | 4.025729732 | 0.202255509  | 0.844025025 | 0.844025025 | -5.612132127 |
| 1423993_at   | 0.016313144  | 10.05674756 | 0.202223671  | 0.844049211 | 0.844049211 | -5.612138324 |
| 1424629_at   | 0.014660436  | 8.337108231 | 0.202156024  | 0.844100599 | 0.844100599 | -5.612151489 |
| 1447240_at   | -0.016978031 | 7.707426421 | -0.202150197 | 0.844105026 | 0.844105026 | -5.612152623 |
| 1450934_at   | -0.012488323 | 12.1620892  | -0.202112312 | 0.844133805 | 0.844133805 | -5.612159993 |
| 1416437_a_at | 0.021556267  | 7.211169725 | 0.202111152  | 0.844134687 | 0.844134687 | -5.612160219 |
| 1429265_a_at | -0.015524025 | 9.7427671   | -0.201973038 | 0.844239609 | 0.844239609 | -5.612187078 |
| 1450981_at   | -0.027440907 | 11.16411013 | -0.201870787 | 0.844317289 | 0.844317289 | -5.612206951 |
| 1419682_a_at | -0.015878926 | 6.616518554 | -0.201867897 | 0.844319485 | 0.844319485 | -5.612207512 |
| 1438118_x_at | 0.017836571  | 12.02583644 | 0.201848949  | 0.84433388  | 0.84433388  | -5.612211194 |
| 1434757_at   | -0.014585593 | 8.632804954 | -0.201847516 | 0.844334968 | 0.844334968 | -5.612211472 |
| 1438206_a_at | -0.015215043 | 9.179409985 | -0.201830038 | 0.844348247 | 0.844348247 | -5.612214868 |
| 1440316_at   | 0.020980175  | 5.923761989 | 0.201782425  | 0.84438442  | 0.84438442  | -5.612224116 |
| 1443648_at   | 0.018673892  | 3.473667147 | 0.201744293  | 0.844413389 | 0.844413389 | -5.612231522 |
| 1440033_at   | -0.022420053 | 5.969316335 | -0.201661229 | 0.844476496 | 0.844476496 | -5.612247648 |
| 1454611_a_at | -0.023345896 | 11.75821241 | -0.20165709  | 0.844479641 | 0.844479641 | -5.612248451 |
| 1455613_at   | -0.015143633 | 6.9849674   | -0.201655551 | 0.84448081  | 0.84448081  | -5.61224875  |
| 1441664_at   | 0.017185204  | 4.15997952  | 0.201647005  | 0.844487303 | 0.844487303 | -5.612250409 |
| 1442286_at   | -0.015849901 | 5.79822706  | -0.201642232 | 0.844490929 | 0.844490929 | -5.612251335 |
| 1436369_at   | -0.027980272 | 6.069336794 | -0.201609197 | 0.844516027 | 0.844516027 | -5.612257746 |
| 1422491_a_at | -0.01340111  | 9.568871914 | -0.201599067 | 0.844523723 | 0.844523723 | -5.612259712 |
| 1431999_at   | -0.017426311 | 4.316684188 | -0.201578522 | 0.844539333 | 0.844539333 | -5.612263699 |
| 1452311_at   | 0.01604006   | 5.686132235 | 0.201571004  | 0.844545044 | 0.844545044 | -5.612265157 |
| 1418947_at   | 0.019195539  | 6.952597107 | 0.20153788   | 0.844570211 | 0.844570211 | -5.612271583 |
| 1435611_x_at | -0.017847993 | 4.641988873 | -0.201517689 | 0.844585551 | 0.844585551 | -5.6122755   |
| 1425294_at   | -0.015918222 | 3.599932154 | -0.201496917 | 0.844601333 | 0.844601333 | -5.612279529 |
| 1439209_at   | -0.018419559 | 8.16834507  | -0.201473619 | 0.844619035 | 0.844619035 | -5.612284047 |
| 1453551_at   | 0.015935436  | 5.618939268 | 0.201422113  | 0.844658168 | 0.844658168 | -5.612294034 |
| 1425129_a_at | 0.016074415  | 10.10862918 | 0.201408679  | 0.844668375 | 0.844668375 | -5.612296639 |
| 1460294_at   | 0.018107829  | 5.571906933 | 0.201361064  | 0.844704552 | 0.844704552 | -5.612305869 |
| 1420140_at   | -0.014711895 | 4.419550128 | -0.201340532 | 0.844720153 | 0.844720153 | -5.612309848 |
| 1418479_at   | 0.013814995  | 8.902515077 | 0.201317852  | 0.844737385 | 0.844737385 | -5.612314243 |
| 1416918_at   | 0.013952167  | 7.549750599 | 0.20123706   | 0.844798771 | 0.844798771 | -5.612329896 |
| 1441223_at   | 0.014152935  | 5.386799371 | 0.201202434  | 0.844825081 | 0.844825081 | -5.612336602 |
| 1430985_at   | -0.012441094 | 10.20364343 | -0.201166497 | 0.844852387 | 0.844852387 | -5.612343561 |
| 1451515_s_at | -0.014222403 | 3.533682175 | -0.201152875 | 0.844862737 | 0.844862737 | -5.612346199 |
| 1426793_a_at | 0.016284961  | 12.08366776 | 0.20114075   | 0.84487195  | 0.84487195  | -5.612348547 |
| 1457456_at   | 0.030509972  | 6.50562848  | 0.201122104  | 0.844886118 | 0.844886118 | -5.612352156 |
| 1433717_at   | -0.014614294 | 9.023068545 | -0.201111209 | 0.844894396 | 0.844894396 | -5.612354266 |
| 1418681_at   | -0.014861775 | 4.811374195 | -0.201031605 | 0.844954883 | 0.844954883 | -5.612369672 |
| 1422139_at   | 0.022227665  | 3.483864656 | 0.200999512  | 0.844979269 | 0.844979269 | -5.612375882 |
| 1452396_at   | -0.03596734  | 7.33580322  | -0.200996569 | 0.844981505 | 0.844981505 | -5.612376451 |
| 1460415_a_at | -0.021411136 | 5.358056811 | -0.200945386 | 0.845020397 | 0.845020397 | -5.612386353 |
| 1451169_at   | -0.016755975 | 6.710880779 | -0.200876208 | 0.845072963 | 0.845072963 | -5.612399731 |
| 1448122_at   | 0.012125409  | 12.33888965 | 0.200795317  | 0.845134431 | 0.845134431 | -5.612415369 |
| 1434277_a_at | -0.019766711 | 8.548446279 | -0.200792688 | 0.845136429 | 0.845136429 | -5.612415877 |

|              |              |             |              |             |             |              |
|--------------|--------------|-------------|--------------|-------------|-------------|--------------|
| 1441090_at   | -0.017624279 | 4.633898193 | -0.200785844 | 0.845141629 | 0.845141629 | -5.612417199 |
| 1435437_at   | 0.012642061  | 9.127814231 | 0.200732095  | 0.845182473 | 0.845182473 | -5.612427586 |
| 1452775_at   | -0.016605357 | 8.151678162 | -0.200709098 | 0.845199949 | 0.845199949 | -5.612432029 |
| 1433721_x_at | 0.013640786  | 13.4161955  | 0.200642769  | 0.845250353 | 0.845250353 | -5.612444842 |
| 1430926_at   | -0.016219818 | 3.711595046 | -0.200630643 | 0.845259568 | 0.845259568 | -5.612447184 |
| 1432941_at   | -0.020960842 | 4.044869801 | -0.200624824 | 0.84526399  | 0.84526399  | -5.612448308 |
| 1434080_at   | -0.015705199 | 9.947660547 | -0.200612014 | 0.845273724 | 0.845273724 | -5.612450781 |
| 1417421_at   | -0.019397456 | 5.055652105 | -0.200600239 | 0.845282672 | 0.845282672 | -5.612453055 |
| 1442396_at   | 0.019972896  | 4.904077736 | 0.200594262  | 0.845287215 | 0.845287215 | -5.612454209 |
| 1449916_at   | 0.024779555  | 4.752217311 | 0.200559486  | 0.845313642 | 0.845313642 | -5.612460924 |
| 1460624_at   | -0.012715122 | 7.871437032 | -0.200554042 | 0.845317778 | 0.845317778 | -5.612461974 |
| 1452525_a_at | 0.019610091  | 5.287690873 | 0.200553953  | 0.845317846 | 0.845317846 | -5.612461992 |
| 1422795_at   | -0.015214133 | 8.490883981 | -0.200518528 | 0.845344767 | 0.845344767 | -5.61246883  |
| 1437346_x_at | -0.014008124 | 3.382497741 | -0.200513751 | 0.845348397 | 0.845348397 | -5.612469752 |
| 1435267_at   | -0.031906083 | 10.54713789 | -0.200457651 | 0.84539103  | 0.84539103  | -5.612480578 |
| 1428698_at   | -0.024672491 | 6.954681315 | -0.200438559 | 0.845405539 | 0.845405539 | -5.612484262 |
| 1436994_a_at | 0.03336706   | 7.188157181 | 0.200394014  | 0.845439391 | 0.845439391 | -5.612492855 |
| 1439117_at   | -0.022534582 | 7.364138151 | -0.200362733 | 0.845463163 | 0.845463163 | -5.612498889 |
| 1451778_at   | 0.032341875  | 7.445952284 | 0.200312125  | 0.845501624 | 0.845501624 | -5.612508649 |
| 1445669_at   | 0.039721655  | 4.032655149 | 0.200154365  | 0.845621519 | 0.845621519 | -5.612539056 |
| 1441409_at   | -0.015080897 | 3.589622201 | -0.200047989 | 0.845702366 | 0.845702366 | -5.612559546 |
| 1450645_at   | -0.020807308 | 3.50689344  | -0.20002774  | 0.845717755 | 0.845717755 | -5.612563445 |
| 1437824_at   | 0.012213896  | 3.184760761 | 0.19992228   | 0.845797907 | 0.845797907 | -5.612583746 |
| 1415958_at   | 0.01515638   | 7.284641208 | 0.199920511  | 0.845799252 | 0.845799252 | -5.612584086 |
| 1427956_at   | 0.022138587  | 6.923449329 | 0.199838359  | 0.845861691 | 0.845861691 | -5.612599893 |
| 1453685_at   | -0.012536794 | 4.094161571 | -0.199831865 | 0.845866627 | 0.845866627 | -5.612601142 |
| 1444272_at   | 0.018615667  | 3.810146664 | 0.199753601  | 0.845926112 | 0.845926112 | -5.612616194 |
| 1444745_at   | -0.019258415 | 3.474582224 | -0.199738926 | 0.845937266 | 0.845937266 | -5.612619016 |
| 1459866_x_at | 0.015964142  | 10.29058353 | 0.199735861  | 0.845939595 | 0.845939595 | -5.612619605 |
| 1426030_a_at | 0.016235508  | 8.836637594 | 0.199728286  | 0.845945354 | 0.845945354 | -5.612621061 |
| 1418969_at   | -0.013043104 | 10.47700804 | -0.199662886 | 0.845995062 | 0.845995062 | -5.612633633 |
| 1421150_at   | -0.013371968 | 5.053943122 | -0.19961361  | 0.846032516 | 0.846032516 | -5.612643103 |
| 1439435_x_at | 0.014171374  | 10.33196387 | 0.199560641  | 0.846072777 | 0.846072777 | -5.61265328  |
| 1456074_at   | -0.014193464 | 4.093972382 | -0.199544747 | 0.846084858 | 0.846084858 | -5.612656333 |
| 1458143_at   | -0.014125656 | 3.545245439 | -0.19954162  | 0.846087235 | 0.846087235 | -5.612656934 |
| 1422903_at   | 0.026960886  | 7.122776943 | 0.199509278  | 0.846111819 | 0.846111819 | -5.612663145 |
| 1440906_at   | 0.019529536  | 3.300739648 | 0.199485151  | 0.846130158 | 0.846130158 | -5.612667779 |
| 1458050_at   | 0.057468252  | 7.273424897 | 0.199391632  | 0.846201243 | 0.846201243 | -5.612685733 |
| 1437382_at   | 0.014279558  | 8.262693013 | 0.199342278  | 0.846238759 | 0.846238759 | -5.612695205 |
| 1448535_at   | 0.015682256  | 7.566868435 | 0.199323997  | 0.846252655 | 0.846252655 | -5.612698713 |
| 1425436_x_at | 0.019135632  | 4.800060005 | 0.199321124  | 0.846254839 | 0.846254839 | -5.612699264 |
| 1440435_at   | 0.032972818  | 4.748029027 | 0.199292873  | 0.846276313 | 0.846276313 | -5.612704685 |
| 1433698_a_at | -0.015469262 | 9.941379031 | -0.199291215 | 0.846277573 | 0.846277573 | -5.612705002 |
| 1437378_x_at | 0.023277713  | 7.904635001 | 0.199265449  | 0.846297159 | 0.846297159 | -5.612709945 |
| 1415808_at   | 0.01880052   | 3.46531395  | 0.19924586   | 0.84631205  | 0.84631205  | -5.612713703 |
| 1457422_at   | -0.016946989 | 3.827181887 | -0.199181717 | 0.846360808 | 0.846360808 | -5.612726004 |
| 1437043_a_at | -0.015748293 | 8.791880344 | -0.199133387 | 0.846397547 | 0.846397547 | -5.612735269 |
| 1424762_at   | -0.023161719 | 6.961609392 | -0.199108006 | 0.846416841 | 0.846416841 | -5.612740134 |
| 1439503_at   | -0.012896714 | 6.793055984 | -0.199095956 | 0.846426001 | 0.846426001 | -5.612742444 |
| 1435443_at   | -0.017778632 | 8.004809162 | -0.199038173 | 0.846469927 | 0.846469927 | -5.612753517 |
| 1436235_x_at | 0.014357643  | 7.531586443 | 0.199033253  | 0.846473667 | 0.846473667 | -5.61275446  |
| 1451138_x_at | 0.022163747  | 7.755752891 | 0.199004156  | 0.846495786 | 0.846495786 | -5.612760034 |
| 1423587_a_at | -0.013784314 | 8.321977857 | -0.199000927 | 0.846498241 | 0.846498241 | -5.612760653 |

|              |              |             |              |             |             |              |
|--------------|--------------|-------------|--------------|-------------|-------------|--------------|
| 1458376_at   | -0.022833428 | 8.809097081 | -0.198999154 | 0.846499588 | 0.846499588 | -5.612760993 |
| 1445526_at   | 0.015100804  | 3.465651388 | 0.19899556   | 0.84650232  | 0.84650232  | -5.612761681 |
| 1429726_at   | 0.020803908  | 7.10520667  | 0.198937805  | 0.846546225 | 0.846546225 | -5.612772743 |
| 1439077_at   | 0.017928968  | 4.29615326  | 0.198930924  | 0.846551457 | 0.846551457 | -5.612774061 |
| 1418753_at   | -0.015308073 | 7.678232109 | -0.198920461 | 0.84655941  | 0.84655941  | -5.612776064 |
| 1425931_a_at | -0.01901472  | 5.891422311 | -0.198855631 | 0.846608695 | 0.846608695 | -5.612788477 |
| 1417817_a_at | 0.014803413  | 9.307962432 | 0.198828473  | 0.846629341 | 0.846629341 | -5.612793675 |
| 1448009_at   | -0.016783971 | 7.294697718 | -0.198815112 | 0.846639498 | 0.846639498 | -5.612796233 |
| 1442410_at   | 0.026759005  | 4.390552352 | 0.198813583  | 0.846640661 | 0.846640661 | -5.612796525 |
| 1443813_x_at | 0.015164229  | 6.212233375 | 0.198792239  | 0.846656887 | 0.846656887 | -5.61280061  |
| 1460508_at   | 0.018896043  | 3.916981237 | 0.198785274  | 0.846662182 | 0.846662182 | -5.612801943 |
| 1458234_at   | -0.013668386 | 3.521008925 | -0.198772655 | 0.846671775 | 0.846671775 | -5.612804358 |
| 1415747_s_at | 0.016712505  | 10.22378792 | 0.198768977  | 0.846674571 | 0.846674571 | -5.612805062 |
| 1450366_at   | 0.019216387  | 5.49266253  | 0.19876182   | 0.846680012 | 0.846680012 | -5.612806431 |
| 1443282_at   | 0.0288639    | 5.993486242 | 0.198731788  | 0.846702844 | 0.846702844 | -5.612812177 |
| 1436647_at   | -0.025545624 | 6.06653374  | -0.198723921 | 0.846708824 | 0.846708824 | -5.612813682 |
| 1443683_at   | -0.012800676 | 4.689294422 | -0.198704305 | 0.846723737 | 0.846723737 | -5.612817434 |
| 1456496_at   | -0.022168394 | 4.156496917 | -0.19867297  | 0.84674756  | 0.84674756  | -5.612823428 |
| 1459460_at   | -0.015054772 | 4.602609854 | -0.198650421 | 0.846764702 | 0.846764702 | -5.61282774  |
| 1424061_at   | 0.015032338  | 7.844040392 | 0.19858397   | 0.846815222 | 0.846815222 | -5.612840446 |
| 1432454_at   | 0.0162434    | 5.504473131 | 0.198543306  | 0.846846137 | 0.846846137 | -5.612848219 |
| 1435882_at   | -0.020008078 | 8.473907295 | -0.1985335   | 0.846853592 | 0.846853592 | -5.612850093 |
| 1444927_at   | 0.018797166  | 3.42834796  | 0.198528016  | 0.846857762 | 0.846857762 | -5.612851141 |
| 1428072_a_at | -0.013348841 | 7.950380967 | -0.198483644 | 0.846891497 | 0.846891497 | -5.612859621 |
| 1451794_at   | -0.016925464 | 4.369297171 | -0.19834511  | 0.846996822 | 0.846996822 | -5.612886082 |
| 1427454_at   | 0.013035086  | 4.386302846 | 0.198282192  | 0.847044659 | 0.847044659 | -5.612898094 |
| 1442556_at   | -0.022398817 | 5.537103918 | -0.198260276 | 0.847061322 | 0.847061322 | -5.612902277 |
| 1446256_at   | -0.0169349   | 4.253076071 | -0.198252134 | 0.847067513 | 0.847067513 | -5.612903831 |
| 1437564_at   | -0.016504917 | 6.126708145 | -0.198240494 | 0.847076363 | 0.847076363 | -5.612906052 |
| 1419966_at   | 0.014012845  | 3.151568168 | 0.198237932  | 0.847078311 | 0.847078311 | -5.612906541 |
| 1453813_at   | 0.020042453  | 3.261462068 | 0.19822536   | 0.847087869 | 0.847087869 | -5.612908941 |
| 1458688_at   | 0.020456946  | 6.139507985 | 0.198191738  | 0.847113433 | 0.847113433 | -5.612915356 |
| 1443034_at   | -0.019088407 | 5.176529586 | -0.198159854 | 0.847137675 | 0.847137675 | -5.612921439 |
| 1438183_x_at | -0.018153974 | 4.986390184 | -0.198140906 | 0.847152082 | 0.847152082 | -5.612925053 |
| 1442915_at   | 0.018244374  | 3.701717458 | 0.198126225  | 0.847163245 | 0.847163245 | -5.612927854 |
| 1438036_x_at | 0.018494385  | 4.601188701 | 0.1981086    | 0.847176645 | 0.847176645 | -5.612931215 |
| 1451113_a_at | -0.017549609 | 10.17034895 | -0.198074154 | 0.847202836 | 0.847202836 | -5.612937784 |
| 1455601_at   | -0.013172835 | 3.456944054 | -0.198070982 | 0.847205248 | 0.847205248 | -5.612938389 |
| 1450329_a_at | 0.015115751  | 3.761581288 | 0.198043777  | 0.847225933 | 0.847225933 | -5.612943576 |
| 1428031_at   | 0.01859688   | 3.845996474 | 0.19800236   | 0.847257424 | 0.847257424 | -5.612951472 |
| 1421141_a_at | -0.022996484 | 7.421768216 | -0.197992401 | 0.847264998 | 0.847264998 | -5.61295337  |
| 1445064_at   | -0.012997345 | 4.276669193 | -0.197990929 | 0.847266116 | 0.847266116 | -5.612953651 |
| 1441467_at   | -0.017954461 | 7.236332478 | -0.197970685 | 0.847281509 | 0.847281509 | -5.612957509 |
| 1459110_at   | 0.014523218  | 5.240470578 | 0.197886085  | 0.847345836 | 0.847345836 | -5.612973629 |
| 1428212_x_at | -0.011652446 | 13.75122571 | -0.197811431 | 0.847402602 | 0.847402602 | -5.612987849 |
| 1452941_at   | 0.016109225  | 7.471532746 | 0.197773638  | 0.84743134  | 0.84743134  | -5.612995045 |
| 1437322_at   | 0.037997678  | 7.727675099 | 0.197762684  | 0.847439669 | 0.847439669 | -5.612997131 |
| 1434515_at   | 0.015340893  | 8.495890045 | 0.197762476  | 0.847439827 | 0.847439827 | -5.61299717  |
| 1422876_at   | -0.02228825  | 4.280500774 | -0.197755802 | 0.847444902 | 0.847444902 | -5.612998441 |
| 1454011_a_at | -0.013914337 | 8.595233925 | -0.197754397 | 0.84744597  | 0.84744597  | -5.612998708 |
| 1420516_at   | -0.014871109 | 4.342964529 | -0.197711779 | 0.847478377 | 0.847478377 | -5.613006821 |
| 1451988_s_at | 0.01238728   | 11.65417248 | 0.197653118  | 0.847522984 | 0.847522984 | -5.613017985 |
| 1449483_at   | 0.015070621  | 8.269341856 | 0.197642954  | 0.847530712 | 0.847530712 | -5.613019919 |

|              |              |             |              |             |             |              |
|--------------|--------------|-------------|--------------|-------------|-------------|--------------|
| 1459936_at   | -0.012075368 | 3.563313236 | -0.197587289 | 0.847573041 | 0.847573041 | -5.613030509 |
| 1448658_at   | -0.015114898 | 8.150487213 | -0.197563081 | 0.847591449 | 0.847591449 | -5.613035114 |
| 1431886_at   | 0.013639825  | 3.565074997 | 0.197533742  | 0.84761376  | 0.84761376  | -5.613040693 |
| 1448011_at   | 0.013533379  | 3.717533244 | 0.197529366  | 0.847617087 | 0.847617087 | -5.613041526 |
| 1448140_at   | 0.020351573  | 7.666725556 | 0.197520603  | 0.847623751 | 0.847623751 | -5.613043192 |
| 1444902_at   | 0.017454445  | 5.2527371   | 0.197505583  | 0.847635173 | 0.847635173 | -5.613046048 |
| 1434970_a_at | -0.017647157 | 9.080029017 | -0.197443849 | 0.847682118 | 0.847682118 | -5.613057784 |
| 1425751_at   | -0.017721642 | 4.706111491 | -0.197441127 | 0.847684188 | 0.847684188 | -5.613058302 |
| 1422505_at   | -0.01395511  | 8.756984679 | -0.197431284 | 0.847691674 | 0.847691674 | -5.613060173 |
| 1454512_at   | 0.030966978  | 5.146153757 | 0.197354433  | 0.847750115 | 0.847750115 | -5.613074777 |
| 1455729_at   | 0.015416748  | 9.607000152 | 0.197330699  | 0.847768164 | 0.847768164 | -5.613079286 |
| 1420677_x_at | 0.0140914    | 4.895799801 | 0.197305162  | 0.847787584 | 0.847787584 | -5.613084138 |
| 1454678_s_at | -0.016281232 | 7.168989113 | -0.19730166  | 0.847790247 | 0.847790247 | -5.613084803 |
| 1431584_at   | -0.016571721 | 4.441692711 | -0.197293364 | 0.847796556 | 0.847796556 | -5.613086378 |
| 1433756_at   | -0.028430767 | 8.721847528 | -0.197291824 | 0.847797728 | 0.847797728 | -5.613086671 |
| 1417515_at   | 0.021305275  | 8.422008613 | 0.197276819  | 0.847809139 | 0.847809139 | -5.613089521 |
| 1418332_a_at | -0.017943616 | 8.302560202 | -0.197268615 | 0.847815378 | 0.847815378 | -5.613091079 |
| 1416737_at   | -0.015953119 | 8.195470464 | -0.197247259 | 0.847831618 | 0.847831618 | -5.613095135 |
| 1460653_at   | -0.018019114 | 8.16244814  | -0.197213507 | 0.847857286 | 0.847857286 | -5.613101543 |
| 1442903_at   | 0.017392385  | 7.376375759 | 0.197210705  | 0.847859417 | 0.847859417 | -5.613102076 |
| 1455077_a_at | -0.016623526 | 13.03148316 | -0.197201791 | 0.847866196 | 0.847866196 | -5.613103768 |
| 1417879_at   | -0.020715226 | 8.74034113  | -0.197198318 | 0.847868837 | 0.847868837 | -5.613104427 |
| 1428908_at   | -0.013907058 | 8.614631016 | -0.197190959 | 0.847874433 | 0.847874433 | -5.613105824 |
| 1440420_at   | -0.014214018 | 4.435249664 | -0.197135216 | 0.847916826 | 0.847916826 | -5.613116405 |
| 1442273_at   | -0.025668804 | 3.994495264 | -0.197117404 | 0.847930372 | 0.847930372 | -5.613119786 |
| 1444461_at   | -0.017456125 | 5.72401692  | -0.197101564 | 0.847942419 | 0.847942419 | -5.613122792 |
| 1444343_at   | -0.013089244 | 7.747292771 | -0.197039206 | 0.847989842 | 0.847989842 | -5.613134622 |
| 1454549_at   | 0.015751765  | 3.377086775 | 0.197028113  | 0.847998279 | 0.847998279 | -5.613136727 |
| 1436828_a_at | 0.016279123  | 8.585422283 | 0.197020894  | 0.848003769 | 0.848003769 | -5.613138096 |
| 1444972_at   | 0.015812956  | 4.166687081 | 0.19697458   | 0.848038992 | 0.848038992 | -5.61314688  |
| 1426895_at   | 0.020164997  | 9.336861477 | 0.196964406  | 0.848046729 | 0.848046729 | -5.613148809 |
| 1442838_at   | 0.015632944  | 4.869050726 | 0.196900787  | 0.848095114 | 0.848095114 | -5.613160871 |
| 1433885_at   | -0.018889932 | 8.965913688 | -0.196873261 | 0.848116048 | 0.848116048 | -5.613166089 |
| 1430718_s_at | -0.012269465 | 7.349286053 | -0.196866901 | 0.848120885 | 0.848120885 | -5.613167294 |
| 1441794_at   | 0.017067075  | 5.191925124 | 0.196856553  | 0.848128755 | 0.848128755 | -5.613169255 |
| 1451381_at   | 0.016169376  | 8.208559581 | 0.196830185  | 0.84814881  | 0.84814881  | -5.613174253 |
| 1420194_at   | 0.013766756  | 3.568445602 | 0.196811504  | 0.848163017 | 0.848163017 | -5.613177792 |
| 1454026_a_at | -0.027826361 | 5.053000244 | -0.196713831 | 0.848237304 | 0.848237304 | -5.613196295 |
| 1420431_at   | -0.017830755 | 3.294018823 | -0.196597898 | 0.84832548  | 0.84832548  | -5.613218245 |
| 1438673_at   | 0.015879633  | 9.286588326 | 0.196578526  | 0.848340214 | 0.848340214 | -5.613221911 |
| 1418621_at   | 0.015129478  | 11.35277992 | 0.19656225   | 0.848352594 | 0.848352594 | -5.613224992 |
| 1437688_x_at | -0.020651014 | 10.32850247 | -0.196532894 | 0.848374922 | 0.848374922 | -5.613230547 |
| 1424548_at   | 0.014312177  | 7.237027574 | 0.196526926  | 0.848379461 | 0.848379461 | -5.613231676 |
| 1427947_at   | 0.015774514  | 7.555291969 | 0.19643722   | 0.848447692 | 0.848447692 | -5.613248645 |
| 1451176_at   | 0.017273638  | 7.543906684 | 0.196414333  | 0.8484651   | 0.8484651   | -5.613252973 |
| 1448214_at   | 0.016128208  | 6.02429369  | 0.19626451   | 0.84857906  | 0.84857906  | -5.613281295 |
| 1433822_x_at | -0.016538809 | 12.30162749 | -0.196250793 | 0.848589494 | 0.848589494 | -5.613283886 |
| 1453425_at   | 0.015933342  | 3.671154123 | 0.196246342  | 0.84859288  | 0.84859288  | -5.613284727 |
| 1416344_at   | 0.018226188  | 9.375556418 | 0.196239226  | 0.848598292 | 0.848598292 | -5.613286072 |
| 1436490_x_at | -0.013876813 | 3.453158511 | -0.196207653 | 0.848622309 | 0.848622309 | -5.613292037 |
| 1453995_a_at | -0.017470254 | 7.330175291 | -0.196140691 | 0.848673244 | 0.848673244 | -5.613304684 |
| 1454742_at   | -0.023821423 | 5.481102106 | -0.19611229  | 0.848694847 | 0.848694847 | -5.613310047 |
| 1459491_at   | -0.016592775 | 4.620968173 | -0.196038001 | 0.848751357 | 0.848751357 | -5.613324071 |

|                  |              |             |              |             |             |              |
|------------------|--------------|-------------|--------------|-------------|-------------|--------------|
| 1452046_a_at     | -0.01223632  | 10.44616071 | -0.196018467 | 0.848766216 | 0.848766216 | -5.613327758 |
| 1459253_at       | 0.128495207  | 5.79420725  | 0.195979697  | 0.848795708 | 0.848795708 | -5.613335074 |
| 1449917_at       | -0.017007626 | 5.416702799 | -0.195939059 | 0.848826622 | 0.848826622 | -5.613342741 |
| 1423828_at       | -0.018223776 | 9.703038065 | -0.19593325  | 0.84883104  | 0.84883104  | -5.613343837 |
| 1437760_at       | -0.015858771 | 5.54202026  | -0.195897355 | 0.848858346 | 0.848858346 | -5.613350608 |
| 1418172_at       | 0.018896669  | 8.534056267 | 0.195850353  | 0.8488941   | 0.8488941   | -5.613359471 |
| 1457728_at       | -0.020312673 | 6.826919776 | -0.195837687 | 0.848903736 | 0.848903736 | -5.61336186  |
| 1442942_at       | 0.021217812  | 6.030324407 | 0.195777458  | 0.848949553 | 0.848949553 | -5.613373214 |
| AFFX-GapdhMur/M3 | -0.012512397 | 13.07351953 | -0.195735256 | 0.848981657 | 0.848981657 | -5.613381168 |
| 1445580_at       | -0.019890117 | 3.745839223 | -0.195714014 | 0.848997816 | 0.848997816 | -5.613385171 |
| 1417365_a_at     | 0.017463314  | 11.81177701 | 0.195704268  | 0.849005231 | 0.849005231 | -5.613387008 |
| 1449995_at       | -0.016680496 | 3.978705374 | -0.195701294 | 0.849007493 | 0.849007493 | -5.613387568 |
| 1438434_at       | 0.013192351  | 9.501803671 | 0.195684494  | 0.849020273 | 0.849020273 | -5.613390733 |
| 1449634_a_at     | -0.014586959 | 4.061343494 | -0.195672528 | 0.849029377 | 0.849029377 | -5.613392988 |
| 1435024_at       | -0.018898278 | 6.710568216 | -0.195662689 | 0.849036862 | 0.849036862 | -5.613394841 |
| 1455064_at       | 0.018048765  | 8.039268834 | 0.195655727  | 0.849042158 | 0.849042158 | -5.613396153 |
| 1433494_at       | 0.021086553  | 6.703179905 | 0.195632709  | 0.849059668 | 0.849059668 | -5.613400489 |
| 1442656_at       | -0.016459306 | 6.347445191 | -0.195594905 | 0.849088428 | 0.849088428 | -5.613407609 |
| 1431810_a_at     | -0.021167244 | 5.251756223 | -0.195542448 | 0.849128335 | 0.849128335 | -5.613417486 |
| 1428840_s_at     | -0.013927166 | 7.780663745 | -0.195487437 | 0.849170186 | 0.849170186 | -5.613427842 |
| 1454689_at       | 0.014934129  | 10.55388261 | 0.195484631  | 0.84917232  | 0.84917232  | -5.61342837  |
| 1428177_at       | -0.014159074 | 9.872626553 | -0.195459124 | 0.849191725 | 0.849191725 | -5.61343317  |
| 1428451_at       | 0.013092986  | 9.184364177 | 0.195430008  | 0.849213877 | 0.849213877 | -5.613438649 |
| 1433746_at       | -0.016922385 | 8.870612058 | -0.195412498 | 0.849227197 | 0.849227197 | -5.613441944 |
| 1455317_at       | -0.015079564 | 9.260675961 | -0.195346649 | 0.849277295 | 0.849277295 | -5.613454331 |
| 1429161_at       | 0.017271742  | 7.44418437  | 0.195346099  | 0.849277713 | 0.849277713 | -5.613454434 |
| 1453923_at       | 0.019349781  | 4.195419919 | 0.195263629  | 0.849340457 | 0.849340457 | -5.613469942 |
| 1421157_at       | 0.024305656  | 5.66252703  | 0.195225171  | 0.849369716 | 0.849369716 | -5.613477172 |
| 1418278_at       | -0.013697957 | 3.890647131 | -0.195161119 | 0.849418448 | 0.849418448 | -5.61348921  |
| 1443838_x_at     | 0.023943083  | 5.859532593 | 0.19515697   | 0.849421605 | 0.849421605 | -5.613489989 |
| 1447130_at       | 0.013982074  | 3.986059192 | 0.195067943  | 0.849489339 | 0.849489339 | -5.613506714 |
| 1429627_at       | -0.023365867 | 8.940643927 | -0.195008142 | 0.849534839 | 0.849534839 | -5.613517944 |
| 1428516_a_at     | -0.014570269 | 7.823371709 | -0.194922765 | 0.849599798 | 0.849599798 | -5.613533971 |
| 1428332_at       | 0.015922556  | 7.232115639 | 0.194920256  | 0.849601707 | 0.849601707 | -5.613534442 |
| 1445690_at       | 0.016342167  | 3.06193582  | 0.194897647  | 0.849618909 | 0.849618909 | -5.613538684 |
| 1442433_at       | 0.018634315  | 3.262855397 | 0.194847739  | 0.849656883 | 0.849656883 | -5.613548049 |
| 1439295_x_at     | 0.024394227  | 7.256680068 | 0.194780478  | 0.849708061 | 0.849708061 | -5.613560665 |
| 1417842_at       | 0.014275263  | 9.261383939 | 0.194775492  | 0.849711854 | 0.849711854 | -5.6135616   |
| 1442795_x_at     | 0.01665342   | 3.063671981 | 0.194773011  | 0.849713743 | 0.849713743 | -5.613562066 |
| 1457564_at       | 0.013437847  | 4.253324235 | 0.194754289  | 0.849727988 | 0.849727988 | -5.613565576 |
| 1449423_at       | -0.017152683 | 6.206290223 | -0.194749066 | 0.849731962 | 0.849731962 | -5.613566556 |
| 1426244_at       | 0.014718461  | 7.867733708 | 0.194694977  | 0.849773118 | 0.849773118 | -5.613576697 |
| 1459851_x_at     | -0.016149231 | 6.659683703 | -0.194691286 | 0.849775926 | 0.849775926 | -5.613577389 |
| 1448050_s_at     | 0.012318208  | 7.383319479 | 0.194689154  | 0.849777549 | 0.849777549 | -5.613577788 |
| 1443996_at       | 0.028971644  | 7.89636347  | 0.194674181  | 0.849788942 | 0.849788942 | -5.613580595 |
| 1429932_at       | -0.017888739 | 3.660674009 | -0.194610177 | 0.849837643 | 0.849837643 | -5.61359259  |
| 1437091_at       | -0.02247466  | 4.83389424  | -0.194600597 | 0.849844933 | 0.849844933 | -5.613594385 |
| 1453543_at       | 0.018811952  | 4.191981153 | 0.19459958   | 0.849845706 | 0.849845706 | -5.613594576 |
| 1449904_at       | 0.024153099  | 4.673351824 | 0.194596452  | 0.849848087 | 0.849848087 | -5.613595162 |
| 1428004_at       | 0.016772516  | 8.646620612 | 0.194588698  | 0.849853987 | 0.849853987 | -5.613596615 |
| 1417810_a_at     | 0.015495172  | 9.978088031 | 0.194559527  | 0.849876184 | 0.849876184 | -5.61360208  |
| 1424132_at       | -0.018740264 | 7.713867193 | -0.194512105 | 0.849912268 | 0.849912268 | -5.613610962 |
| 1449777_at       | -0.013745797 | 4.739167436 | -0.194505698 | 0.849917143 | 0.849917143 | -5.613612162 |

|              |              |             |              |             |             |              |
|--------------|--------------|-------------|--------------|-------------|-------------|--------------|
| 1450783_at   | 0.01488472   | 3.771733062 | 0.194437078  | 0.849969359 | 0.849969359 | -5.613625011 |
| 1423698_at   | 0.012906746  | 9.070332756 | 0.194430315  | 0.849974505 | 0.849974505 | -5.613626277 |
| 1445261_at   | 0.016800864  | 4.833920357 | 0.194424747  | 0.849978743 | 0.849978743 | -5.61362732  |
| 1440939_at   | 0.022355106  | 4.586616899 | 0.194335054  | 0.850046994 | 0.850046994 | -5.613644107 |
| 1452339_at   | -0.023754059 | 6.940153638 | -0.194293076 | 0.850078938 | 0.850078938 | -5.613651961 |
| 1420451_at   | -0.015733057 | 3.656046778 | -0.194286443 | 0.850083985 | 0.850083985 | -5.613653202 |
| 1428428_at   | 0.015263864  | 8.899903007 | 0.194234064  | 0.850123844 | 0.850123844 | -5.613662999 |
| 1420813_at   | -0.021860146 | 8.62211032  | -0.194212951 | 0.850139911 | 0.850139911 | -5.613666947 |
| 1439428_x_at | 0.015612624  | 5.038215736 | 0.194195349  | 0.850153306 | 0.850153306 | -5.613670239 |
| 1420594_at   | 0.024664594  | 4.268356927 | 0.194168163  | 0.850173994 | 0.850173994 | -5.613675322 |
| 1417007_a_at | -0.019765928 | 10.32912776 | -0.194064956 | 0.850252534 | 0.850252534 | -5.613694612 |
| 1459925_at   | -0.01358179  | 4.949069041 | -0.194051279 | 0.850262942 | 0.850262942 | -5.613697168 |
| 1419033_at   | -0.017193025 | 9.344726705 | -0.194045435 | 0.850267389 | 0.850267389 | -5.61369826  |
| 1429461_at   | 0.014982501  | 9.50007126  | 0.193928962  | 0.850356027 | 0.850356027 | -5.613720015 |
| 1437450_x_at | 0.019485076  | 11.04274765 | 0.193914378  | 0.850367126 | 0.850367126 | -5.613722739 |
| 1451976_s_at | 0.013013627  | 3.186490145 | 0.193907756  | 0.850372166 | 0.850372166 | -5.613723975 |
| 1438003_at   | -0.02049768  | 6.966467    | -0.193884377 | 0.850389958 | 0.850389958 | -5.61372834  |
| 1434144_s_at | -0.015270679 | 8.003944142 | -0.193877998 | 0.850394813 | 0.850394813 | -5.613729531 |
| 1455348_x_at | 0.012796029  | 13.58919559 | 0.193853974  | 0.850413095 | 0.850413095 | -5.613734015 |
| 1416711_at   | 0.015620078  | 3.268446412 | 0.193772304  | 0.85047525  | 0.85047525  | -5.613749257 |
| 1438566_at   | 0.015360353  | 3.704464904 | 0.193761373  | 0.850483569 | 0.850483569 | -5.613751296 |
| 1433704_s_at | -0.015276913 | 10.72502814 | -0.193740685 | 0.850499314 | 0.850499314 | -5.613755156 |
| 1454153_at   | -0.015379359 | 3.769286337 | -0.193734255 | 0.850504208 | 0.850504208 | -5.613756355 |
| 1451143_at   | 0.015392649  | 6.486018106 | 0.193678209  | 0.850546862 | 0.850546862 | -5.613766809 |
| 1421769_at   | 0.016347508  | 4.505158476 | 0.193655552  | 0.850564106 | 0.850564106 | -5.613771034 |
| 1428772_at   | 0.013143155  | 9.827890994 | 0.193600512  | 0.850605995 | 0.850605995 | -5.613781296 |
| 1417862_at   | -0.017200386 | 5.29433169  | -0.193580323 | 0.850621361 | 0.850621361 | -5.613785059 |
| 1449082_at   | -0.021192883 | 5.143511191 | -0.193560702 | 0.850636294 | 0.850636294 | -5.613788716 |
| 1458655_at   | -0.021384615 | 7.436079156 | -0.193555231 | 0.850640457 | 0.850640457 | -5.613789736 |
| 1435802_at   | 0.0267889    | 6.942145423 | 0.193514482  | 0.850671471 | 0.850671471 | -5.613797329 |
| 1437522_x_at | 0.021561247  | 3.807318247 | 0.193477467  | 0.850699643 | 0.850699643 | -5.613804226 |
| 1444036_at   | 0.018084792  | 3.636203328 | 0.193460234  | 0.850712759 | 0.850712759 | -5.613807436 |
| 1455513_at   | -0.011867777 | 8.489240444 | -0.193429337 | 0.850736275 | 0.850736275 | -5.613813192 |
| 1456822_at   | 0.024870053  | 7.94590217  | 0.193347472  | 0.850798584 | 0.850798584 | -5.613828436 |
| 1428690_at   | 0.017371418  | 6.570144304 | 0.19334581   | 0.850799848 | 0.850799848 | -5.613828745 |
| 1453648_at   | 0.016521221  | 4.45867189  | 0.193312485  | 0.850825213 | 0.850825213 | -5.613834949 |
| 1426897_at   | 0.021912386  | 9.927571427 | 0.193311912  | 0.850825649 | 0.850825649 | -5.613835056 |
| 1437413_x_at | -0.01323651  | 13.69212253 | -0.193296111 | 0.850837676 | 0.850837676 | -5.613837997 |
| 1435304_at   | -0.013418568 | 7.932967299 | -0.193268549 | 0.850858654 | 0.850858654 | -5.613843127 |
| 1435480_at   | -0.013729521 | 7.855746654 | -0.193242329 | 0.850878611 | 0.850878611 | -5.613848006 |
| 1429809_at   | -0.016451868 | 9.130757553 | -0.193234599 | 0.850884495 | 0.850884495 | -5.613849444 |
| 1458656_at   | 0.016683615  | 7.57570035  | 0.193229285  | 0.850888539 | 0.850888539 | -5.613850433 |
| 1435038_s_at | 0.017452214  | 3.663242357 | 0.193147678  | 0.850950654 | 0.850950654 | -5.613865614 |
| 1431713_at   | -0.011988089 | 5.381003735 | -0.193128413 | 0.850965318 | 0.850965318 | -5.613869197 |
| 1428256_at   | 0.013707897  | 10.45446852 | 0.193121138  | 0.850970856 | 0.850970856 | -5.61387055  |
| 1417449_at   | 0.015091461  | 7.369898329 | 0.193030652  | 0.85103973  | 0.85103973  | -5.613887372 |
| 1423949_at   | 0.013397372  | 9.826708931 | 0.192970472  | 0.851085537 | 0.851085537 | -5.613898556 |
| 1436594_at   | 0.016666025  | 7.230534108 | 0.192950969  | 0.851100383 | 0.851100383 | -5.61390218  |
| 1424291_at   | -0.012948614 | 9.13330953  | -0.192947261 | 0.851103206 | 0.851103206 | -5.613902869 |
| 1453922_at   | -0.016914562 | 4.17602485  | -0.192887313 | 0.851148837 | 0.851148837 | -5.613914006 |
| 1429008_at   | 0.017333936  | 7.62089571  | 0.192867174  | 0.851164167 | 0.851164167 | -5.613917746 |
| 1458462_at   | 0.019858764  | 3.949757938 | 0.192861829  | 0.851168236 | 0.851168236 | -5.613918739 |
| 1416427_at   | 0.021814338  | 11.88575703 | 0.192818732  | 0.851201041 | 0.851201041 | -5.613926741 |

|              |              |             |              |             |             |              |
|--------------|--------------|-------------|--------------|-------------|-------------|--------------|
| 1429788_at   | 0.015063665  | 3.656463308 | 0.192792712  | 0.851220848 | 0.851220848 | -5.613931572 |
| 1451825_a_at | 0.012563499  | 10.5200229  | 0.192780363  | 0.851230248 | 0.851230248 | -5.613933865 |
| 1446639_at   | -0.025613638 | 3.860802068 | -0.192756273 | 0.851248585 | 0.851248585 | -5.613938336 |
| 1436470_at   | -0.051792996 | 5.336245657 | -0.192710863 | 0.851283152 | 0.851283152 | -5.613946764 |
| 1424288_at   | 0.016117188  | 8.666047506 | 0.192696514  | 0.851294075 | 0.851294075 | -5.613949426 |
| 1418584_at   | 0.01561813   | 9.71568254  | 0.192670169  | 0.85131413  | 0.85131413  | -5.613954315 |
| 1445592_at   | -0.014704624 | 3.248021098 | -0.192646238 | 0.851332347 | 0.851332347 | -5.613958754 |
| 1450932_s_at | -0.020394545 | 7.970963486 | -0.192631179 | 0.85134381  | 0.85134381  | -5.613961548 |
| 1455088_at   | -0.016634022 | 4.198520026 | -0.192596316 | 0.85137035  | 0.85137035  | -5.613968014 |
| 1421068_at   | -0.01931851  | 5.068479845 | -0.192595146 | 0.85137124  | 0.85137124  | -5.613968231 |
| 1448945_at   | -0.013472071 | 5.584624944 | -0.192548486 | 0.85140676  | 0.85140676  | -5.613976883 |
| 1421660_at   | 0.020007884  | 3.541101967 | 0.192509799  | 0.85143621  | 0.85143621  | -5.613984056 |
| 1442700_at   | -0.029823739 | 5.789240972 | -0.192501563 | 0.85144248  | 0.85144248  | -5.613985582 |
| 1439751_at   | 0.024379956  | 5.832996778 | 0.192481342  | 0.851457873 | 0.851457873 | -5.61398933  |
| 1417501_at   | -0.012416672 | 6.679364193 | -0.19246582  | 0.85146969  | 0.85146969  | -5.613992207 |
| 1416404_s_at | 0.011855193  | 13.37237861 | 0.192438426  | 0.851490544 | 0.851490544 | -5.613997284 |
| 1452740_at   | -0.012585108 | 11.80286616 | -0.192416763 | 0.851507035 | 0.851507035 | -5.614001298 |
| 1445866_at   | 0.021364501  | 6.86810198  | 0.192401527  | 0.851518634 | 0.851518634 | -5.614004121 |
| 1434311_at   | 0.014472582  | 7.997858359 | 0.192369619  | 0.851542925 | 0.851542925 | -5.614010032 |
| 1434039_at   | -0.021595317 | 7.977338893 | -0.192346471 | 0.851560547 | 0.851560547 | -5.61401432  |
| 1443732_at   | 0.019225282  | 4.666579921 | 0.192339985  | 0.851565484 | 0.851565484 | -5.614015521 |
| 1442283_at   | 0.014675322  | 6.253223141 | 0.192334151  | 0.851569926 | 0.851569926 | -5.614016602 |
| 1437616_x_at | -0.014798373 | 6.99921518  | -0.192323668 | 0.851577906 | 0.851577906 | -5.614018543 |
| 1421768_a_at | -0.022184424 | 5.181762786 | -0.19232161  | 0.851579473 | 0.851579473 | -5.614018925 |
| 1429345_at   | -0.016327178 | 7.278671891 | -0.192320308 | 0.851580464 | 0.851580464 | -5.614019166 |
| 1438545_at   | -0.016858124 | 7.988456103 | -0.192310666 | 0.851587805 | 0.851587805 | -5.614020951 |
| 1442787_at   | -0.022818568 | 4.264522373 | -0.192261444 | 0.851625277 | 0.851625277 | -5.614030065 |
| 1439436_x_at | 0.020979662  | 10.03407638 | 0.192248148  | 0.851635399 | 0.851635399 | -5.614032527 |
| 1437870_at   | -0.021036349 | 3.345524207 | -0.192246823 | 0.851636408 | 0.851636408 | -5.614032772 |
| 1430229_at   | 0.02075188   | 6.067611205 | 0.192238284  | 0.851642909 | 0.851642909 | -5.614034353 |
| 1444602_at   | 0.015533603  | 4.664282619 | 0.192228104  | 0.851650659 | 0.851650659 | -5.614036237 |
| 1450916_at   | 0.024565839  | 7.323838178 | 0.192210506  | 0.851664056 | 0.851664056 | -5.614039495 |
| 1449231_at   | -0.016489743 | 4.741981249 | -0.192202506 | 0.851670146 | 0.851670146 | -5.614040975 |
| 1459390_at   | 0.017029026  | 4.685640996 | 0.192190194  | 0.85167952  | 0.85167952  | -5.614043254 |
| 1429373_x_at | -0.019317731 | 5.75783663  | -0.192168475 | 0.851696055 | 0.851696055 | -5.614047274 |
| 1429955_at   | -0.014152203 | 5.101695773 | -0.19214445  | 0.851714345 | 0.851714345 | -5.614051719 |
| 1447985_s_at | -0.032417158 | 3.697052435 | -0.192081112 | 0.851762565 | 0.851762565 | -5.614063436 |
| 1447377_at   | -0.013326066 | 6.28916203  | -0.192064156 | 0.851775474 | 0.851775474 | -5.614066573 |
| 1442320_at   | -0.022474095 | 8.138313522 | -0.192047664 | 0.851788031 | 0.851788031 | -5.614069623 |
| 1436333_a_at | -0.024842875 | 7.636209507 | -0.19203844  | 0.851795053 | 0.851795053 | -5.614071328 |
| 1452475_at   | -0.011772356 | 4.078228582 | -0.192001867 | 0.851822897 | 0.851822897 | -5.614078091 |
| 1421830_at   | -0.020842103 | 6.732240717 | -0.191972214 | 0.851845473 | 0.851845473 | -5.614083573 |
| 1451029_at   | -0.023752195 | 5.169307209 | -0.191951327 | 0.851861375 | 0.851861375 | -5.614087434 |
| 1435653_at   | 0.01797783   | 9.158878769 | 0.191934371  | 0.851874285 | 0.851874285 | -5.614090568 |
| 1446011_at   | -0.015114854 | 4.100947982 | -0.191922741 | 0.851883139 | 0.851883139 | -5.614092718 |
| 1452869_at   | 0.014014354  | 9.386703983 | 0.191902739  | 0.851898368 | 0.851898368 | -5.614096414 |
| 1460699_at   | -0.011682437 | 7.390830641 | -0.191892896 | 0.851905862 | 0.851905862 | -5.614098233 |
| 1429306_at   | 0.012625208  | 7.034711652 | 0.191889654  | 0.85190833  | 0.85190833  | -5.614098832 |
| 1447070_at   | 0.01295068   | 8.062363023 | 0.19188604   | 0.851911082 | 0.851911082 | -5.6140995   |
| 1435284_at   | 0.018565606  | 9.455507556 | 0.191848987  | 0.851939292 | 0.851939292 | -5.614106346 |
| 1445595_at   | 0.014801207  | 3.375869459 | 0.191773562  | 0.851996719 | 0.851996719 | -5.614120278 |
| 1422271_at   | -0.022403573 | 4.517917499 | -0.19174704  | 0.852016912 | 0.852016912 | -5.614125176 |
| 1448836_s_at | -0.016973957 | 6.737031973 | -0.191724488 | 0.852034083 | 0.852034083 | -5.61412934  |



|              |              |             |              |             |             |              |
|--------------|--------------|-------------|--------------|-------------|-------------|--------------|
| 1456227_x_at | 0.013965458  | 12.22096023 | 0.191709839  | 0.852045236 | 0.852045236 | -5.614132044 |
| 1431443_at   | 0.020976082  | 4.890108953 | 0.19170875   | 0.852046065 | 0.852046065 | -5.614132245 |
| 1450178_at   | 0.012780468  | 6.356626119 | 0.191637225  | 0.852100523 | 0.852100523 | -5.614145447 |
| 1449697_s_at | -0.012189931 | 8.251974043 | -0.191621841 | 0.852112237 | 0.852112237 | -5.614148286 |
| 1459261_at   | -0.023790832 | 3.564318907 | -0.191578645 | 0.852145126 | 0.852145126 | -5.614156256 |
| 1431552_at   | -0.0119841   | 3.327117822 | -0.191568967 | 0.852152496 | 0.852152496 | -5.614158041 |
| 1433602_at   | 0.031591397  | 3.699966733 | 0.191566052  | 0.852154715 | 0.852154715 | -5.614158579 |
| 1436300_at   | 0.015149459  | 7.949194143 | 0.191563386  | 0.852156745 | 0.852156745 | -5.614159071 |
| 1431706_at   | -0.017973316 | 5.343433508 | -0.191538911 | 0.852175381 | 0.852175381 | -5.614163586 |
| 1434991_at   | 0.012945512  | 8.092400343 | 0.191507191  | 0.852199532 | 0.852199532 | -5.614169436 |
| 1433488_x_at | -0.021414191 | 9.614973745 | -0.19143499  | 0.852254508 | 0.852254508 | -5.614182748 |
| 1428974_s_at | 0.058292119  | 7.071960436 | 0.191434069  | 0.852255209 | 0.852255209 | -5.614182918 |
| 1457022_at   | -0.016457023 | 5.327083421 | -0.191389485 | 0.852289157 | 0.852289157 | -5.614191136 |
| 1444300_at   | -0.015080181 | 4.198115547 | -0.191386102 | 0.852291733 | 0.852291733 | -5.61419176  |
| 1416742_at   | 0.01151362   | 10.69703052 | 0.191376037  | 0.852299397 | 0.852299397 | -5.614193615 |
| 1454955_at   | -0.012288951 | 11.14826551 | -0.191339921 | 0.852326897 | 0.852326897 | -5.61420027  |
| 1428786_at   | -0.021934887 | 5.851278871 | -0.191334777 | 0.852330813 | 0.852330813 | -5.614201218 |
| 1423899_at   | 0.014606067  | 8.607409134 | 0.191260581  | 0.85238731  | 0.85238731  | -5.614214886 |
| 1416110_at   | 0.015749701  | 9.174633218 | 0.19125774   | 0.852389474 | 0.852389474 | -5.61421541  |
| 1447439_at   | 0.017751216  | 4.868483492 | 0.191244687  | 0.852399413 | 0.852399413 | -5.614217814 |
| 1453318_at   | 0.015007738  | 6.192420191 | 0.19124424   | 0.852399753 | 0.852399753 | -5.614217896 |
| 1456581_x_at | -0.014257571 | 11.67419147 | -0.191210278 | 0.852425614 | 0.852425614 | -5.61422415  |
| 1442476_at   | -0.015586097 | 4.262496849 | -0.191190218 | 0.85244089  | 0.85244089  | -5.614227844 |
| 1429486_at   | -0.011680566 | 6.938782318 | -0.191169003 | 0.852457044 | 0.852457044 | -5.61423175  |
| 1435167_at   | 0.029893543  | 6.866100838 | 0.19106731   | 0.852534481 | 0.852534481 | -5.614250466 |
| 1451237_s_at | -0.013173955 | 10.54578355 | -0.191027245 | 0.85256499  | 0.85256499  | -5.614257837 |
| 1446523_at   | 0.015709192  | 3.231481697 | 0.190990143  | 0.852593243 | 0.852593243 | -5.614264662 |
| 1458881_at   | -0.012431324 | 3.91970281  | -0.190966111 | 0.852611543 | 0.852611543 | -5.614269082 |
| 1427731_at   | -0.011875218 | 4.106647964 | -0.190950547 | 0.852623395 | 0.852623395 | -5.614271944 |
| 1454852_at   | -0.011546631 | 10.42253741 | -0.190920876 | 0.85264599  | 0.85264599  | -5.614277399 |
| 1440115_at   | -0.021850416 | 3.72566211  | -0.190803913 | 0.85273506  | 0.85273506  | -5.614298898 |
| 1442365_at   | 0.019883545  | 6.687958065 | 0.190773992  | 0.852757846 | 0.852757846 | -5.614304395 |
| 1451921_a_at | -0.027156143 | 4.88785413  | -0.190757426 | 0.852770462 | 0.852770462 | -5.614307439 |
| 1430357_at   | 0.060105379  | 8.263267895 | 0.190698446  | 0.852815377 | 0.852815377 | -5.614318272 |
| 1427730_a_at | 0.012552333  | 7.77956508  | 0.190672487  | 0.852835146 | 0.852835146 | -5.614323039 |
| 1429086_at   | 0.031408999  | 7.942861902 | 0.190663608  | 0.852841908 | 0.852841908 | -5.614324669 |
| 1416384_a_at | -0.012705385 | 10.35485278 | -0.190652369 | 0.852850467 | 0.852850467 | -5.614326733 |
| 1429542_at   | -0.012674423 | 3.232867958 | -0.190587019 | 0.852900235 | 0.852900235 | -5.614338729 |
| 1425815_a_at | 0.01479685   | 8.711284586 | 0.190579222  | 0.852906173 | 0.852906173 | -5.61434016  |
| 1445958_at   | -0.018613427 | 4.986737167 | -0.190450074 | 0.853004529 | 0.853004529 | -5.614363855 |
| 1424320_a_at | 0.015844601  | 8.403209834 | 0.190347377  | 0.853082742 | 0.853082742 | -5.614382686 |
| 1458064_at   | 0.013050042  | 3.858124857 | 0.19033723   | 0.853090471 | 0.853090471 | -5.614384546 |
| 1429198_at   | 0.012923155  | 8.058621826 | 0.190282473  | 0.853132174 | 0.853132174 | -5.614394581 |
| 1426708_at   | -0.015639147 | 8.841541539 | -0.190279964 | 0.853134085 | 0.853134085 | -5.614395041 |
| 1459159_a_at | 0.017958569  | 6.329947851 | 0.190277696  | 0.853135813 | 0.853135813 | -5.614395457 |
| 1444817_at   | -0.028367231 | 4.461788259 | -0.190260228 | 0.853149116 | 0.853149116 | -5.614398658 |
| 1445494_at   | 0.012008899  | 3.394618823 | 0.190200995  | 0.853194229 | 0.853194229 | -5.614409509 |
| 1427229_at   | 0.031431216  | 7.392634599 | 0.19019402   | 0.853199542 | 0.853199542 | -5.614410787 |
| 1420503_at   | -0.014292812 | 3.50532124  | -0.190156216 | 0.853228334 | 0.853228334 | -5.61441771  |
| 1442804_at   | 0.013656778  | 5.666742844 | 0.190155456  | 0.853228914 | 0.853228914 | -5.61441785  |
| 1432446_at   | -0.012033085 | 3.826396987 | -0.19007512  | 0.8532901   | 0.8532901   | -5.614432558 |
| 1428029_a_at | 0.011918353  | 11.54137662 | 0.190026877  | 0.853326844 | 0.853326844 | -5.614441388 |
| 1442654_at   | 0.035396839  | 6.884204753 | 0.189953059  | 0.853383069 | 0.853383069 | -5.614454895 |

|              |              |             |              |             |             |              |
|--------------|--------------|-------------|--------------|-------------|-------------|--------------|
| 1451407_at   | 0.011854476  | 4.198673515 | 0.189920104  | 0.85340817  | 0.85340817  | -5.614460923 |
| 1452541_at   | 0.017881221  | 5.942574248 | 0.18988422   | 0.853435501 | 0.853435501 | -5.614467486 |
| 1428803_at   | -0.015860595 | 6.829770083 | -0.189844131 | 0.853466037 | 0.853466037 | -5.614474816 |
| 1443132_at   | 0.016325465  | 5.140814989 | 0.189801609  | 0.853498425 | 0.853498425 | -5.61448259  |
| 1417881_at   | 0.024229891  | 7.156318237 | 0.189771006  | 0.853521735 | 0.853521735 | -5.614488183 |
| 1428756_at   | 0.016332011  | 8.764522313 | 0.189769168  | 0.853523135 | 0.853523135 | -5.614488519 |
| 1449080_at   | -0.022908522 | 9.86302645  | -0.189748837 | 0.853538621 | 0.853538621 | -5.614492235 |
| 1448853_at   | -0.022097806 | 9.700407184 | -0.1897374   | 0.853547333 | 0.853547333 | -5.614494324 |
| 1423221_at   | 0.02097138   | 5.403890577 | 0.189633708  | 0.853626316 | 0.853626316 | -5.614513267 |
| 1447956_at   | -0.015315731 | 4.122474572 | -0.189618124 | 0.853638187 | 0.853638187 | -5.614516113 |
| 1427995_at   | 0.014271336  | 3.722910007 | 0.18958127   | 0.853666259 | 0.853666259 | -5.614522842 |
| 1426388_s_at | -0.01801246  | 9.06188234  | -0.189557654 | 0.853684248 | 0.853684248 | -5.614527154 |
| 1450878_at   | -0.012527529 | 9.887560636 | -0.189557354 | 0.853684477 | 0.853684477 | -5.614527209 |
| 1423617_at   | 0.013556815  | 8.571776062 | 0.189549458  | 0.853690491 | 0.853690491 | -5.61452865  |
| 1417905_at   | 0.012939567  | 3.201068441 | 0.189541661  | 0.85369643  | 0.85369643  | -5.614530073 |
| 1418902_at   | -0.015714179 | 7.174875743 | -0.189530523 | 0.853704914 | 0.853704914 | -5.614532107 |
| 1450795_at   | -0.014939659 | 5.202611083 | -0.189525262 | 0.853708922 | 0.853708922 | -5.614533067 |
| 1459690_at   | -0.01931702  | 5.428197477 | -0.189516617 | 0.853715507 | 0.853715507 | -5.614534645 |
| 1450160_at   | 0.020738502  | 3.949379815 | 0.189467603  | 0.853752843 | 0.853752843 | -5.61454359  |
| 1451483_s_at | -0.021945447 | 6.754362925 | -0.189371049 | 0.853826393 | 0.853826393 | -5.614561203 |
| 1450417_a_at | -0.01757488  | 5.848955679 | -0.189364633 | 0.853831281 | 0.853831281 | -5.614562374 |
| 1415799_at   | 0.017076209  | 9.631454445 | 0.189346994  | 0.853844718 | 0.853844718 | -5.61456559  |
| 1453380_a_at | -0.012247984 | 7.566570874 | -0.189329342 | 0.853858164 | 0.853858164 | -5.614568809 |
| 1431145_a_at | 0.013670815  | 9.182584563 | 0.189323778  | 0.853862403 | 0.853862403 | -5.614569824 |
| 1452738_at   | -0.017781742 | 7.071930837 | -0.189210918 | 0.853948376 | 0.853948376 | -5.614590396 |
| 1427842_at   | 0.012495568  | 3.578960967 | 0.189191184  | 0.853963409 | 0.853963409 | -5.614593992 |
| 1447242_at   | -0.013174947 | 5.094416043 | -0.189093236 | 0.854038026 | 0.854038026 | -5.614611834 |
| 1433122_at   | 0.017927625  | 3.822618701 | 0.189061764  | 0.854062001 | 0.854062001 | -5.614617565 |
| 1431502_a_at | -0.014872182 | 7.884543515 | -0.189048647 | 0.854071994 | 0.854071994 | -5.614619954 |
| 1430277_at   | -0.015172039 | 6.509637431 | -0.189046347 | 0.854073746 | 0.854073746 | -5.614620372 |
| 1438392_at   | 0.023297116  | 3.983598161 | 0.189015878  | 0.854096958 | 0.854096958 | -5.614625919 |
| 1416093_a_at | -0.011835623 | 9.692293533 | -0.188977479 | 0.85412621  | 0.85412621  | -5.614632909 |
| 1418153_at   | -0.030443586 | 6.095140444 | -0.188975161 | 0.854127977 | 0.854127977 | -5.614633331 |
| 1442582_at   | 0.017398226  | 3.396991419 | 0.188971238  | 0.854130965 | 0.854130965 | -5.614634045 |
| 1421871_at   | -0.0180667   | 10.523602   | -0.188923916 | 0.854167016 | 0.854167016 | -5.614642656 |
| 1428726_at   | 0.014315738  | 6.624698841 | 0.188889781  | 0.854193022 | 0.854193022 | -5.614648867 |
| 1434269_at   | -0.012113402 | 7.310229991 | -0.188872815 | 0.854205947 | 0.854205947 | -5.614651953 |
| 1433816_at   | 0.016051733  | 10.65549548 | 0.188859808  | 0.854215856 | 0.854215856 | -5.614654319 |
| 1453653_at   | 0.012675995  | 4.146797357 | 0.18885713   | 0.854217896 | 0.854217896 | -5.614654806 |
| 1435945_a_at | 0.012198485  | 5.959886934 | 0.188827868  | 0.854240189 | 0.854240189 | -5.614660128 |
| 1427114_at   | 0.018910038  | 7.649830835 | 0.188823115  | 0.854243811 | 0.854243811 | -5.614660992 |
| 1449170_at   | -0.013768621 | 3.785845421 | -0.18878209  | 0.854275065 | 0.854275065 | -5.614668452 |
| 1435406_at   | 0.012494694  | 7.334552111 | 0.188770698  | 0.854283744 | 0.854283744 | -5.614670523 |
| 1428964_at   | -0.01741772  | 4.114664865 | -0.188747672 | 0.854301287 | 0.854301287 | -5.61467471  |
| 1424404_at   | -0.02320717  | 5.607874281 | -0.188741949 | 0.854305647 | 0.854305647 | -5.61467575  |
| 1417725_a_at | -0.015929105 | 7.18818484  | -0.188725042 | 0.854318528 | 0.854318528 | -5.614678823 |
| 1443723_at   | 0.018068401  | 3.237721036 | 0.188669336  | 0.854360968 | 0.854360968 | -5.614688947 |
| 1445536_at   | -0.015504327 | 4.837070802 | -0.188665811 | 0.854363654 | 0.854363654 | -5.614689587 |
| 1452713_a_at | 0.018531874  | 9.639990586 | 0.188660261  | 0.854367882 | 0.854367882 | -5.614690596 |
| 1420964_at   | 0.022233228  | 5.027734807 | 0.188657047  | 0.854370331 | 0.854370331 | -5.61469118  |
| 1451117_a_at | 0.017959663  | 7.111429157 | 0.188643913  | 0.854380337 | 0.854380337 | -5.614693566 |
| 1436692_at   | 0.035015984  | 5.896982391 | 0.188614051  | 0.854403088 | 0.854403088 | -5.614698991 |
| 1416179_a_at | -0.024277463 | 10.54820243 | -0.188605913 | 0.854409289 | 0.854409289 | -5.61470047  |

|              |              |             |              |             |             |              |
|--------------|--------------|-------------|--------------|-------------|-------------|--------------|
| 1457334_at   | -0.014563419 | 7.75092033  | -0.188594535 | 0.854417957 | 0.854417957 | -5.614702536 |
| 1445713_at   | 0.013382138  | 3.335835315 | 0.188569961  | 0.854436668 | 0.854436668 | -5.614707    |
| 1454772_at   | 0.047890403  | 5.706075043 | 0.188563853  | 0.854441333 | 0.854441333 | -5.614708109 |
| 1456129_at   | -0.013808413 | 5.77250527  | -0.188553377 | 0.854449315 | 0.854449315 | -5.614710011 |
| 1428937_at   | -0.012114242 | 9.410549754 | -0.188541126 | 0.854458649 | 0.854458649 | -5.614712236 |
| 1434435_s_at | 0.012028525  | 8.835776214 | 0.188535859  | 0.854462662 | 0.854462662 | -5.614713193 |
| 1445401_at   | -0.023556688 | 3.488181001 | -0.188451957 | 0.854526586 | 0.854526586 | -5.614728424 |
| 1434030_at   | 0.016229805  | 7.361779534 | 0.188353904  | 0.854601294 | 0.854601294 | -5.614746216 |
| 1439810_s_at | -0.013287425 | 4.036419785 | -0.188343438 | 0.854609268 | 0.854609268 | -5.614748115 |
| 1459303_at   | -0.016701195 | 3.47878823  | -0.188258178 | 0.85467423  | 0.85467423  | -5.614763578 |
| 1419205_x_at | -0.014067749 | 6.714713896 | -0.188228733 | 0.854696665 | 0.854696665 | -5.614768916 |
| 1447055_at   | -0.012653927 | 4.779941069 | -0.188227389 | 0.85469769  | 0.85469769  | -5.61476916  |
| 1459463_at   | -0.020059268 | 5.127988717 | -0.18822445  | 0.854699929 | 0.854699929 | -5.614769692 |
| 1415754_at   | -0.014930592 | 9.315006677 | -0.188135673 | 0.854767573 | 0.854767573 | -5.614785783 |
| 1417580_s_at | -0.024479606 | 8.385985101 | -0.188078225 | 0.854811346 | 0.854811346 | -5.614796191 |
| 1450159_at   | -0.015015273 | 4.246418623 | -0.188009308 | 0.854863858 | 0.854863858 | -5.614808673 |
| 1437958_at   | 0.015315063  | 6.329881245 | 0.188008262  | 0.854864655 | 0.854864655 | -5.614808862 |
| 1452897_at   | -0.014960357 | 8.322796802 | -0.187992607 | 0.854876584 | 0.854876584 | -5.614811697 |
| 1431037_a_at | -0.018761736 | 9.898810297 | -0.187915302 | 0.854935489 | 0.854935489 | -5.614825691 |
| 1428246_at   | -0.01218722  | 8.796151573 | -0.18788391  | 0.854959409 | 0.854959409 | -5.614831372 |
| 1445518_at   | 0.016192017  | 8.252372309 | 0.187878159  | 0.854963792 | 0.854963792 | -5.614832413 |
| 1428808_at   | -0.016892998 | 8.217155146 | -0.187865568 | 0.854973386 | 0.854973386 | -5.614834691 |
| 1421241_at   | 0.023857364  | 5.002381875 | 0.187860824  | 0.854977001 | 0.854977001 | -5.614835549 |
| 1435482_at   | -0.014420771 | 4.193059581 | -0.18785742  | 0.854979595 | 0.854979595 | -5.614836165 |
| 1432579_at   | -0.018269207 | 5.827955813 | -0.187807629 | 0.855017536 | 0.855017536 | -5.614845173 |
| 1459534_at   | 0.013516033  | 3.877549596 | 0.187761161  | 0.855052945 | 0.855052945 | -5.614853577 |
| 1425277_at   | -0.012585015 | 5.798944452 | -0.187753799 | 0.855058554 | 0.855058554 | -5.614854909 |
| 1424578_at   | 0.01258386   | 8.310575804 | 0.187734938  | 0.855072927 | 0.855072927 | -5.614858319 |
| 1446857_at   | -0.0213751   | 3.127638923 | -0.18772361  | 0.855081559 | 0.855081559 | -5.614860367 |
| 1439386_x_at | 0.018779861  | 4.022758483 | 0.187710841  | 0.855091289 | 0.855091289 | -5.614862676 |
| 1416830_at   | -0.014465584 | 8.996807967 | -0.187672998 | 0.855120127 | 0.855120127 | -5.614869517 |
| 1434833_at   | -0.035447686 | 6.595724327 | -0.187605291 | 0.855171722 | 0.855171722 | -5.614881754 |
| 1423716_s_at | 0.013147886  | 11.11931728 | 0.187598413  | 0.855176963 | 0.855176963 | -5.614882997 |
| 1421065_at   | 0.013471054  | 8.214647553 | 0.187580615  | 0.855190526 | 0.855190526 | -5.614886212 |
| 1443844_at   | 0.013760846  | 3.320712874 | 0.187576733  | 0.855193484 | 0.855193484 | -5.614886914 |
| 1427495_at   | 0.018153974  | 3.763283602 | 0.187574648  | 0.855195073 | 0.855195073 | -5.61488729  |
| 1431585_at   | -0.018496829 | 3.893681558 | -0.187560831 | 0.855205602 | 0.855205602 | -5.614889786 |
| 1436173_at   | 0.012391488  | 8.482049356 | 0.187489232  | 0.855260164 | 0.855260164 | -5.614902718 |
| 1443188_at   | -0.01834499  | 6.529899708 | -0.187488747 | 0.855260534 | 0.855260534 | -5.614902806 |
| 1458247_s_at | 0.022045677  | 8.448495689 | 0.187484639  | 0.855263665 | 0.855263665 | -5.614903548 |
| 1420714_at   | 0.020275144  | 4.41831358  | 0.18745945   | 0.855282859 | 0.855282859 | -5.614908096 |
| 1433881_at   | 0.017202799  | 6.998895891 | 0.187429367  | 0.855305785 | 0.855305785 | -5.614913527 |
| 1454790_at   | 0.014756894  | 8.222470635 | 0.187418371  | 0.855314164 | 0.855314164 | -5.614915512 |
| 1455580_at   | 0.013059183  | 8.209319573 | 0.187412579  | 0.855318578 | 0.855318578 | -5.614916558 |
| 1452007_at   | -0.017184602 | 7.847082819 | -0.187391997 | 0.855334264 | 0.855334264 | -5.614920273 |
| 1433402_at   | -0.020021673 | 5.375318559 | -0.187384628 | 0.855339879 | 0.855339879 | -5.614921603 |
| 1432088_at   | -0.015788684 | 3.942944498 | -0.18737624  | 0.855346271 | 0.855346271 | -5.614923117 |
| 1452636_x_at | -0.018736291 | 7.400244949 | -0.187369435 | 0.855351458 | 0.855351458 | -5.614924345 |
| 1441114_at   | -0.018375961 | 7.130492601 | -0.187367012 | 0.855353304 | 0.855353304 | -5.614924782 |
| 1452926_at   | 0.011879694  | 7.621746272 | 0.187355084  | 0.855362394 | 0.855362394 | -5.614926935 |
| 1453979_at   | -0.021689595 | 4.5303025   | -0.18732667  | 0.855384047 | 0.855384047 | -5.614932062 |
| 1439020_at   | -0.013570797 | 8.206101566 | -0.187310999 | 0.85539599  | 0.85539599  | -5.614934889 |
| 1460656_a_at | 0.014589611  | 9.210761061 | 0.187307485  | 0.855398668 | 0.855398668 | -5.614935523 |

|              |              |             |              |             |             |              |
|--------------|--------------|-------------|--------------|-------------|-------------|--------------|
| 1426447_at   | -0.013853488 | 8.646251131 | -0.187307265 | 0.855398836 | 0.855398836 | -5.614935563 |
| 1422980_a_at | 0.013179796  | 7.804127501 | 0.187289086  | 0.85541269  | 0.85541269  | -5.614938842 |
| 1424027_at   | 0.019661928  | 7.722188919 | 0.187275815  | 0.855422804 | 0.855422804 | -5.614941236 |
| 1457551_at   | -0.02363507  | 6.888423617 | -0.187250666 | 0.85544197  | 0.85544197  | -5.614945772 |
| 1460597_at   | 0.025664342  | 7.227243399 | 0.187211555  | 0.855471775 | 0.855471775 | -5.614952825 |
| 1422886_a_at | 0.016249386  | 9.006026215 | 0.187141255  | 0.855525352 | 0.855525352 | -5.614965499 |
| 1422154_at   | 0.013531045  | 6.358341839 | 0.187113417  | 0.855546567 | 0.855546567 | -5.614970517 |
| 1446680_at   | 0.014456827  | 3.800067693 | 0.187077002  | 0.85557432  | 0.85557432  | -5.614977079 |
| 1425576_at   | -0.0137673   | 9.223133326 | -0.187075413 | 0.855575531 | 0.855575531 | -5.614977365 |
| 1434765_at   | 0.014358967  | 9.177333159 | 0.186999998  | 0.855633007 | 0.855633007 | -5.614990951 |
| 1442483_at   | 0.011331749  | 5.52188176  | 0.186993612  | 0.855637874 | 0.855637874 | -5.614992102 |
| 1430002_at   | 0.013421847  | 4.147372919 | 0.186957059  | 0.855665732 | 0.855665732 | -5.614998685 |
| 1433929_at   | 0.014346277  | 8.676096653 | 0.186927768  | 0.855688056 | 0.855688056 | -5.615003959 |
| 1425083_at   | 0.040281714  | 7.253815691 | 0.186885248  | 0.855720463 | 0.855720463 | -5.615011613 |
| 1433555_at   | -0.011746818 | 7.317008203 | -0.186874493 | 0.85572866  | 0.85572866  | -5.615013549 |
| 1426221_at   | -0.0181105   | 9.164610286 | -0.186849324 | 0.855747843 | 0.855747843 | -5.615018079 |
| 1443396_at   | -0.016287452 | 7.24719444  | -0.186847091 | 0.855749545 | 0.855749545 | -5.615018481 |
| 1430055_at   | 0.021501469  | 5.905319797 | 0.186822992  | 0.855767912 | 0.855767912 | -5.615022818 |
| 1460744_at   | 0.016174694  | 5.182547439 | 0.186776434  | 0.855803397 | 0.855803397 | -5.615031195 |
| 1441935_at   | -0.011607047 | 3.890567344 | -0.186750621 | 0.85582307  | 0.85582307  | -5.615035838 |
| 1427204_at   | 0.020467889  | 3.637291215 | 0.186682383  | 0.85587508  | 0.85587508  | -5.615048111 |
| 1429440_at   | -0.016904202 | 6.356960543 | -0.186680036 | 0.855876868 | 0.855876868 | -5.615048533 |
| 1436130_s_at | -0.020775081 | 4.400433935 | -0.186653077 | 0.855897417 | 0.855897417 | -5.61505338  |
| 1422677_at   | 0.018626748  | 7.264414779 | 0.186650802  | 0.855899151 | 0.855899151 | -5.615053789 |
| 1444324_at   | 0.012879429  | 4.322061544 | 0.18664645   | 0.855902468 | 0.855902468 | -5.615054571 |
| 1441363_at   | -0.021405253 | 5.037292466 | -0.186606641 | 0.855932809 | 0.855932809 | -5.615061727 |
| 1458211_at   | 0.014338741  | 3.15957981  | 0.186586307  | 0.855948308 | 0.855948308 | -5.615065382 |
| 1451952_at   | -0.015716084 | 3.299179372 | -0.186563904 | 0.855965384 | 0.855965384 | -5.615069408 |
| 1431372_at   | 0.014746775  | 5.959470175 | 0.18656374   | 0.855965509 | 0.855965509 | -5.615069437 |
| 1429501_s_at | 0.011930647  | 7.500211018 | 0.186546313  | 0.855978792 | 0.855978792 | -5.615072569 |
| 1456370_s_at | 0.014930414  | 7.552049326 | 0.186541566  | 0.85598241  | 0.85598241  | -5.615073422 |
| 1457569_at   | 0.021592324  | 6.210665488 | 0.18650566   | 0.856009778 | 0.856009778 | -5.615079873 |
| 1425843_at   | -0.017129921 | 3.933633277 | -0.186482973 | 0.85602707  | 0.85602707  | -5.615083948 |
| 1423800_at   | -0.013801804 | 9.807096244 | -0.186395123 | 0.856094031 | 0.856094031 | -5.615099724 |
| 1451306_at   | -0.013665925 | 8.042125615 | -0.186377451 | 0.856107501 | 0.856107501 | -5.615102897 |
| 1419589_at   | 0.024517397  | 8.522775581 | 0.186346781  | 0.856130879 | 0.856130879 | -5.615108402 |
| 1459065_at   | -0.018160713 | 3.711444029 | -0.186308384 | 0.856160147 | 0.856160147 | -5.615115293 |
| 1458916_at   | -0.016612773 | 6.637712094 | -0.186261128 | 0.856196167 | 0.856196167 | -5.615123773 |
| 1456440_s_at | -0.014804787 | 3.945025579 | -0.186218761 | 0.856228461 | 0.856228461 | -5.615131373 |
| 1428843_at   | 0.011608674  | 10.85933811 | 0.186196023  | 0.856245794 | 0.856245794 | -5.615135451 |
| 1445674_at   | 0.019474853  | 4.35744184  | 0.186178529  | 0.856259129 | 0.856259129 | -5.615138589 |
| 1458254_at   | -0.014776814 | 6.699835572 | -0.186103442 | 0.856316366 | 0.856316366 | -5.615152051 |
| 1455820_x_at | 0.023631615  | 8.30632485  | 0.186085678  | 0.856329906 | 0.856329906 | -5.615155235 |
| 1430029_a_at | -0.014595283 | 9.795252588 | -0.186082517 | 0.856332316 | 0.856332316 | -5.615155802 |
| 1440893_at   | 0.014623478  | 6.161115595 | 0.186066237  | 0.856344726 | 0.856344726 | -5.61515872  |
| 1453344_at   | -0.012501475 | 7.877868789 | -0.186026417 | 0.85637508  | 0.85637508  | -5.615165856 |
| 1421060_at   | -0.043767428 | 5.601115888 | -0.185984589 | 0.856406965 | 0.856406965 | -5.61517335  |
| 1449015_at   | 0.01580964   | 4.159827314 | 0.185978019  | 0.856411973 | 0.856411973 | -5.615174527 |
| 1415740_at   | 0.011482724  | 10.50407684 | 0.185902576  | 0.856469483 | 0.856469483 | -5.615188039 |
| 1433533_x_at | 0.026062495  | 6.295232174 | 0.185855094  | 0.856505679 | 0.856505679 | -5.615196541 |
| 1453567_s_at | 0.019189092  | 8.79179642  | 0.185844877  | 0.856513468 | 0.856513468 | -5.61519837  |
| 1440422_at   | -0.014567551 | 3.332842389 | -0.185840575 | 0.856516748 | 0.856516748 | -5.61519914  |
| 1430724_at   | 0.020733242  | 5.179583663 | 0.185764118  | 0.856575032 | 0.856575032 | -5.615212823 |

|              |              |             |              |             |             |              |
|--------------|--------------|-------------|--------------|-------------|-------------|--------------|
| 1435769_at   | -0.011915092 | 9.351291551 | -0.185724611 | 0.85660515  | 0.85660515  | -5.615219892 |
| 1450717_at   | 0.014200083  | 3.748056977 | 0.185723105  | 0.856606298 | 0.856606298 | -5.615220161 |
| 1425565_at   | 0.018391545  | 10.34060027 | 0.185709425  | 0.856616726 | 0.856616726 | -5.615222608 |
| 1416265_at   | 0.012985212  | 7.265565291 | 0.185686208  | 0.856634426 | 0.856634426 | -5.615226761 |
| 1444509_at   | -0.01496461  | 4.054437505 | -0.185679975 | 0.856639177 | 0.856639177 | -5.615227876 |
| 1425514_at   | 0.026593109  | 7.61271492  | 0.185639046  | 0.856670379 | 0.856670379 | -5.615235195 |
| 1446888_at   | 0.015489628  | 5.21870977  | 0.185619634  | 0.856685178 | 0.856685178 | -5.615238667 |
| 1428278_at   | -0.018306292 | 6.229420972 | -0.1856166   | 0.856687491 | 0.856687491 | -5.615239209 |
| 1453134_at   | -0.021699875 | 8.068066192 | -0.185613701 | 0.856689701 | 0.856689701 | -5.615239727 |
| 1426726_at   | -0.01683511  | 8.393716409 | -0.185592308 | 0.85670601  | 0.85670601  | -5.615243552 |
| 1447081_at   | -0.012388423 | 3.079276264 | -0.185418205 | 0.85683874  | 0.85683874  | -5.615274662 |
| 1427832_at   | 0.016560421  | 4.34576714  | 0.185364971  | 0.856879325 | 0.856879325 | -5.615284169 |
| 1431352_s_at | -0.026234989 | 4.743092332 | -0.18534609  | 0.85689372  | 0.85689372  | -5.61528754  |
| 1435374_at   | 0.018025872  | 6.983424847 | 0.185340389  | 0.856898066 | 0.856898066 | -5.615288558 |
| 1457891_at   | 0.01689566   | 3.844611515 | 0.185330647  | 0.856905493 | 0.856905493 | -5.615290297 |
| 1440694_at   | -0.01594823  | 3.372549032 | -0.18532356  | 0.856910897 | 0.856910897 | -5.615291562 |
| 1422136_at   | -0.016309423 | 5.00704963  | -0.185314324 | 0.856917938 | 0.856917938 | -5.615293211 |
| 1432437_at   | -0.021632636 | 4.652108437 | -0.185305639 | 0.856924559 | 0.856924559 | -5.615294761 |
| 1418463_at   | 0.016363386  | 8.595186751 | 0.185291343  | 0.856935459 | 0.856935459 | -5.615297312 |
| 1425323_a_at | -0.015808431 | 9.058309574 | -0.185290644 | 0.856935991 | 0.856935991 | -5.615297437 |
| 1423205_at   | 0.015571615  | 8.802585694 | 0.185247292  | 0.856969044 | 0.856969044 | -5.615305174 |
| 1425243_at   | -0.017321187 | 4.780783072 | -0.185215147 | 0.856993551 | 0.856993551 | -5.61531091  |
| 1430291_at   | 0.015837847  | 6.15129492  | 0.185202562  | 0.857003146 | 0.857003146 | -5.615313155 |
| 1416649_at   | -0.018777745 | 3.798150632 | -0.185132185 | 0.857056803 | 0.857056803 | -5.615325707 |
| 1447490_at   | -0.018092354 | 3.816770981 | -0.18508329  | 0.857094082 | 0.857094082 | -5.615334426 |
| 1431211_s_at | 0.019094025  | 4.120437574 | 0.18503511   | 0.857130816 | 0.857130816 | -5.615343014 |
| 1439992_at   | -0.017898031 | 4.361137332 | -0.185033178 | 0.857132289 | 0.857132289 | -5.615343359 |
| 1416450_at   | 0.014019214  | 6.356304535 | 0.184958198  | 0.857189457 | 0.857189457 | -5.61535672  |
| 1454594_at   | 0.0151479    | 4.203494726 | 0.18495768   | 0.857189852 | 0.857189852 | -5.615356813 |
| 1458266_at   | 0.015981778  | 4.101909175 | 0.184925165  | 0.857214643 | 0.857214643 | -5.615362605 |
| 1460040_at   | -0.013776335 | 3.348986448 | -0.184902347 | 0.857232041 | 0.857232041 | -5.61536667  |
| 1430632_at   | -0.018748029 | 5.306480048 | -0.184895193 | 0.857237496 | 0.857237496 | -5.615367944 |
| 1441017_at   | 0.013380909  | 7.223798011 | 0.184883512  | 0.857246402 | 0.857246402 | -5.615370024 |
| 1432531_at   | 0.015121107  | 4.558211657 | 0.184856601  | 0.857266921 | 0.857266921 | -5.615374816 |
| 1455529_at   | 0.014376255  | 9.602258567 | 0.184839052  | 0.857280301 | 0.857280301 | -5.615377941 |
| 1423207_at   | 0.013764466  | 9.05340678  | 0.18483647   | 0.85728227  | 0.85728227  | -5.615378401 |
| 1429678_at   | 0.013163625  | 7.592829591 | 0.184797597  | 0.85731191  | 0.85731191  | -5.615385322 |
| 1438242_at   | 0.015265834  | 7.642742544 | 0.184779748  | 0.857325519 | 0.857325519 | -5.615388499 |
| 1442223_at   | -0.014266443 | 8.824963882 | -0.184713558 | 0.857375988 | 0.857375988 | -5.615400278 |
| 1458448_at   | -0.021213782 | 5.741599735 | -0.18468722  | 0.857396071 | 0.857396071 | -5.615404964 |
| 1434538_x_at | -0.016942322 | 9.776763559 | -0.184680862 | 0.857400919 | 0.857400919 | -5.615406095 |
| 1416941_s_at | 0.016608361  | 11.95258034 | 0.184678635  | 0.857402617 | 0.857402617 | -5.615406491 |
| 1423956_at   | -0.016210487 | 9.673782932 | -0.184667765 | 0.857410905 | 0.857410905 | -5.615408425 |
| 1429644_at   | 0.019352605  | 4.008598053 | 0.18464822   | 0.857425808 | 0.857425808 | -5.615411902 |
| 1421621_at   | -0.018561885 | 4.423352835 | -0.184637076 | 0.857434305 | 0.857434305 | -5.615413884 |
| 1448668_a_at | 0.024128673  | 8.923528308 | 0.184630852  | 0.857439052 | 0.857439052 | -5.615414991 |
| 1453082_at   | -0.013576889 | 5.856782023 | -0.184625253 | 0.85744332  | 0.85744332  | -5.615415987 |
| 1421539_at   | 0.017013951  | 3.865881393 | 0.184620904  | 0.857446636 | 0.857446636 | -5.61541676  |
| 1418146_a_at | -0.015624181 | 6.967663532 | -0.18461634  | 0.857450116 | 0.857450116 | -5.615417572 |
| 1438445_at   | 0.013672766  | 4.537036593 | 0.184587882  | 0.857471816 | 0.857471816 | -5.615422632 |
| 1435613_x_at | 0.013643808  | 12.68515574 | 0.184559475  | 0.857493477 | 0.857493477 | -5.615427683 |
| 1429313_at   | -0.012886443 | 9.272872961 | -0.184558581 | 0.857494159 | 0.857494159 | -5.615427842 |
| 1457792_at   | 0.016773709  | 4.423680855 | 0.184546953  | 0.857503025 | 0.857503025 | -5.615429909 |

|              |              |             |              |             |             |              |
|--------------|--------------|-------------|--------------|-------------|-------------|--------------|
| 1439644_at   | 0.017812806  | 4.055075759 | 0.184484911  | 0.857550333 | 0.857550333 | -5.615440937 |
| 1459050_at   | 0.013576538  | 3.965337801 | 0.184444105  | 0.85758145  | 0.85758145  | -5.615448188 |
| 1424502_at   | -0.018096114 | 5.893080288 | -0.184442251 | 0.857582863 | 0.857582863 | -5.615448517 |
| 1442444_at   | -0.014510557 | 3.346308163 | -0.184415227 | 0.85760347  | 0.85760347  | -5.615453318 |
| 1426738_at   | -0.02564972  | 6.891288552 | -0.184397838 | 0.85761673  | 0.85761673  | -5.615456407 |
| 1443938_at   | 0.011477466  | 4.115492872 | 0.184368314  | 0.857639243 | 0.857639243 | -5.615461651 |
| 1434863_at   | -0.013663438 | 7.509976915 | -0.184312897 | 0.857681501 | 0.857681501 | -5.615471492 |
| 1433757_a_at | -0.029039321 | 9.356297128 | -0.184290968 | 0.857698223 | 0.857698223 | -5.615475385 |
| 1458402_at   | -0.018149068 | 4.129946631 | -0.184283277 | 0.857704088 | 0.857704088 | -5.61547675  |
| 1450623_at   | -0.018188784 | 11.18935657 | -0.18427354  | 0.857711513 | 0.857711513 | -5.615478479 |
| 1444960_at   | 0.01653264   | 4.158973734 | 0.184266644  | 0.857716772 | 0.857716772 | -5.615479703 |
| 1456758_at   | 0.013538504  | 8.091019785 | 0.184204898  | 0.857763857 | 0.857763857 | -5.615490661 |
| 1445991_at   | 0.041533734  | 4.977574968 | 0.184187203  | 0.857777351 | 0.857777351 | -5.615493801 |
| 1445881_at   | -0.044297662 | 7.446697727 | -0.184180788 | 0.857782243 | 0.857782243 | -5.615494939 |
| 1458938_at   | -0.031944776 | 5.08668497  | -0.184157843 | 0.85779974  | 0.85779974  | -5.61549901  |
| 1436390_a_at | -0.038433094 | 7.705096183 | -0.184146838 | 0.857808131 | 0.857808131 | -5.615500962 |
| 1416026_a_at | 0.013635164  | 12.83797604 | 0.18408834   | 0.857852742 | 0.857852742 | -5.615511337 |
| 1436539_at   | -0.013284141 | 5.978448524 | -0.184087276 | 0.857853553 | 0.857853553 | -5.615511526 |
| 1420841_at   | 0.023714637  | 9.228308202 | 0.184072783  | 0.857864605 | 0.857864605 | -5.615514096 |
| 1445194_at   | 0.022223308  | 4.7995363   | 0.184066445  | 0.857869438 | 0.857869438 | -5.61551522  |
| 1440804_at   | 0.024719033  | 3.871393506 | 0.184051714  | 0.857880672 | 0.857880672 | -5.615517832 |
| 1426435_at   | -0.013091968 | 8.226026596 | -0.184039481 | 0.857890001 | 0.857890001 | -5.615520001 |
| 1439833_at   | 0.018188539  | 7.396466718 | 0.183980801  | 0.85793475  | 0.85793475  | -5.615530402 |
| 1428695_at   | -0.014132062 | 7.811721224 | -0.183971235 | 0.857942045 | 0.857942045 | -5.615532097 |
| 1450432_s_at | -0.015549921 | 7.187432506 | -0.183967125 | 0.85794518  | 0.85794518  | -5.615532826 |
| 1451715_at   | 0.019389228  | 5.376862018 | 0.183936393  | 0.857968616 | 0.857968616 | -5.615538272 |
| 1421783_a_at | 0.018384385  | 4.988304213 | 0.183930792  | 0.857972888 | 0.857972888 | -5.615539264 |
| 1418730_at   | 0.011633267  | 6.356846324 | 0.183921393  | 0.857980055 | 0.857980055 | -5.615540929 |
| 1456824_at   | -0.025553665 | 5.845227729 | -0.183903129 | 0.857993984 | 0.857993984 | -5.615544165 |
| 1455499_at   | 0.023688592  | 4.327202927 | 0.183897835  | 0.857998021 | 0.857998021 | -5.615545103 |
| 1426990_at   | -0.020916479 | 4.075698883 | -0.183897187 | 0.857998515 | 0.857998515 | -5.615545218 |
| 1422105_at   | -0.014854807 | 5.981143541 | -0.183881353 | 0.858010591 | 0.858010591 | -5.615548023 |
| 1417148_at   | 0.023403467  | 8.588673813 | 0.183809166  | 0.858065642 | 0.858065642 | -5.615560807 |
| 1440526_at   | -0.013710396 | 4.042314304 | -0.183768329 | 0.858096786 | 0.858096786 | -5.615568037 |
| 1446802_at   | -0.011283709 | 5.922196233 | -0.183766028 | 0.85809854  | 0.85809854  | -5.615568445 |
| 1451907_a_at | 0.013297965  | 6.310180952 | 0.183739257  | 0.858118957 | 0.858118957 | -5.615573183 |
| 1458832_at   | 0.02092026   | 6.731402593 | 0.183737635  | 0.858120194 | 0.858120194 | -5.61557347  |
| 1429670_a_at | 0.02319464   | 6.708411098 | 0.183698383  | 0.858150129 | 0.858150129 | -5.615580417 |
| 1420177_at   | 0.01936819   | 4.325246697 | 0.183697691  | 0.858150657 | 0.858150657 | -5.61558054  |
| 1438712_at   | -0.023969351 | 4.712714351 | -0.183574147 | 0.858244879 | 0.858244879 | -5.615602395 |
| 1438932_at   | -0.020600418 | 6.444735754 | -0.183555225 | 0.85825931  | 0.85825931  | -5.615605741 |
| 1435525_at   | -0.014633633 | 8.044017322 | -0.18355213  | 0.858261671 | 0.858261671 | -5.615606288 |
| 1451902_at   | -0.015024033 | 7.339215346 | -0.183514671 | 0.85829024  | 0.85829024  | -5.615612911 |
| 1444879_at   | 0.016759522  | 3.42913238  | 0.183411299  | 0.858369079 | 0.858369079 | -5.615631181 |
| 1424006_at   | -0.012607126 | 8.469921419 | -0.183399129 | 0.858378362 | 0.858378362 | -5.615633331 |
| 1448016_at   | -0.021785161 | 7.606826009 | -0.183381786 | 0.858391589 | 0.858391589 | -5.615636395 |
| 1421666_a_at | -0.014481523 | 6.314624576 | -0.183316194 | 0.858441616 | 0.858441616 | -5.61564798  |
| 1454673_at   | 0.012287498  | 10.58451234 | 0.183282314  | 0.858467457 | 0.858467457 | -5.615653963 |
| 1443189_at   | -0.015556557 | 3.643908361 | -0.183274275 | 0.858473588 | 0.858473588 | -5.615655382 |
| 1450485_at   | -0.022948924 | 4.894240612 | -0.183269014 | 0.858477601 | 0.858477601 | -5.615656311 |
| 1444179_at   | 0.012683873  | 4.033041986 | 0.183227371  | 0.858509363 | 0.858509363 | -5.615663662 |
| 1457882_at   | 0.013252323  | 4.319752606 | 0.183215021  | 0.858518783 | 0.858518783 | -5.615665842 |
| 1441773_at   | 0.013703801  | 5.428579458 | 0.183211483  | 0.858521481 | 0.858521481 | -5.615666467 |

|              |              |             |              |             |             |              |
|--------------|--------------|-------------|--------------|-------------|-------------|--------------|
| 1417444_at   | -0.017531596 | 8.423577149 | -0.183126969 | 0.858585942 | 0.858585942 | -5.615681379 |
| 1428003_s_at | 0.011335042  | 7.101681644 | 0.183073665  | 0.858626599 | 0.858626599 | -5.615690782 |
| 1435545_at   | -0.018316412 | 5.56763501  | -0.183038028 | 0.858653781 | 0.858653781 | -5.615697066 |
| 1430057_s_at | 0.022556425  | 4.939430705 | 0.18303289   | 0.858657701 | 0.858657701 | -5.615697972 |
| 1442684_x_at | 0.019499     | 7.60246414  | 0.183012565  | 0.858673203 | 0.858673203 | -5.615701556 |
| 1437400_at   | 0.024992537  | 4.826076147 | 0.18299211   | 0.858688806 | 0.858688806 | -5.615705162 |
| 1455693_x_at | 0.014305952  | 13.7455459  | 0.182968435  | 0.858706864 | 0.858706864 | -5.615709335 |
| 1425808_a_at | 0.017689561  | 4.031508723 | 0.182953573  | 0.8587182   | 0.8587182   | -5.615711955 |
| 1427203_at   | -0.014473537 | 5.960837443 | -0.182876055 | 0.858777328 | 0.858777328 | -5.615725614 |
| 1460715_x_at | 0.014629036  | 3.590304733 | 0.182824886  | 0.858816358 | 0.858816358 | -5.615734628 |
| 1417591_at   | 0.013178204  | 7.125894227 | 0.182817927  | 0.858821667 | 0.858821667 | -5.615735854 |
| 1441284_at   | 0.018449602  | 3.806933922 | 0.182784858  | 0.858846892 | 0.858846892 | -5.615741677 |
| 1419291_x_at | 0.011719369  | 11.54883688 | 0.182760333  | 0.858865599 | 0.858865599 | -5.615745995 |
| 1435382_at   | -0.01634688  | 11.35826005 | -0.182725194 | 0.858892402 | 0.858892402 | -5.615752182 |
| 1423259_at   | -0.016563827 | 9.962646246 | -0.18263045  | 0.858964674 | 0.858964674 | -5.615768855 |
| 1436449_at   | -0.020539188 | 4.953908373 | -0.182596064 | 0.858990904 | 0.858990904 | -5.615774905 |
| 1417116_at   | -0.014920236 | 8.531869506 | -0.182591744 | 0.858994199 | 0.858994199 | -5.615775664 |
| 1460394_a_at | -0.015911503 | 9.540818408 | -0.182549703 | 0.859026269 | 0.859026269 | -5.615783059 |
| 1437198_at   | 0.013338977  | 8.361128572 | 0.182539256  | 0.859034239 | 0.859034239 | -5.615784896 |
| 1453630_at   | 0.015347483  | 4.135492752 | 0.182501811  | 0.859062802 | 0.859062802 | -5.61579148  |
| 1416359_at   | -0.012755852 | 9.127853938 | -0.182489312 | 0.859072337 | 0.859072337 | -5.615793678 |
| 1446227_at   | 0.016766893  | 3.257926159 | 0.182479912  | 0.859079508 | 0.859079508 | -5.61579533  |
| 1456837_at   | 0.019103102  | 5.223972934 | 0.1824787    | 0.859080432 | 0.859080432 | -5.615795543 |
| 1457613_at   | -0.01098319  | 3.241022868 | -0.182466171 | 0.85908999  | 0.85908999  | -5.615797746 |
| 1416605_at   | -0.018148287 | 9.158922883 | -0.182452125 | 0.859100705 | 0.859100705 | -5.615800215 |
| 1440227_at   | 0.017529834  | 7.880602928 | 0.182438243  | 0.859111295 | 0.859111295 | -5.615802655 |
| 1450541_at   | -0.028132347 | 5.854478191 | -0.182437595 | 0.859111789 | 0.859111789 | -5.615802769 |
| 1447935_at   | 0.01802984   | 7.089479194 | 0.182425352  | 0.859121129 | 0.859121129 | -5.61580492  |
| 1426609_at   | -0.012436176 | 9.506630449 | -0.18242461  | 0.859121694 | 0.859121694 | -5.615805051 |
| 1436744_x_at | -0.014087736 | 3.486822968 | -0.182404814 | 0.859136796 | 0.859136796 | -5.61580853  |
| 1427766_at   | 0.016365567  | 3.891893906 | 0.182389651  | 0.859148363 | 0.859148363 | -5.615811194 |
| 1438019_at   | -0.017222719 | 6.805207567 | -0.182332138 | 0.859192237 | 0.859192237 | -5.615821298 |
| 1443345_at   | 0.016074562  | 3.27485344  | 0.182305193  | 0.859212792 | 0.859212792 | -5.615826031 |
| 1430860_at   | 0.015540801  | 4.091616712 | 0.182293688  | 0.859221569 | 0.859221569 | -5.615828051 |
| 1429811_at   | -0.011856253 | 6.845486508 | -0.182257261 | 0.859249358 | 0.859249358 | -5.615834448 |
| 1459043_at   | -0.014506223 | 4.355608569 | -0.182243068 | 0.859260185 | 0.859260185 | -5.61583694  |
| 1425326_at   | 0.018114677  | 9.080169686 | 0.182201432  | 0.859291948 | 0.859291948 | -5.615844249 |
| 1442991_at   | -0.012152454 | 3.250179185 | -0.182156642 | 0.859326118 | 0.859326118 | -5.61585211  |
| 1441253_at   | 0.012713869  | 7.92957441  | 0.182134765  | 0.859342807 | 0.859342807 | -5.615855949 |
| 1426233_at   | -0.015801089 | 8.495010416 | -0.182052814 | 0.859405328 | 0.859405328 | -5.615870326 |
| 1443254_at   | -0.018701021 | 4.003486734 | -0.182038845 | 0.859415985 | 0.859415985 | -5.615872776 |
| 1430308_at   | 0.022597788  | 3.990979195 | 0.181972107  | 0.859466899 | 0.859466899 | -5.615884478 |
| 1421297_a_at | 0.015896599  | 7.684134764 | 0.181936495  | 0.859494068 | 0.859494068 | -5.61589072  |
| 1453010_at   | -0.012038338 | 8.036583633 | -0.181926723 | 0.859501524 | 0.859501524 | -5.615892433 |
| 1424651_at   | 0.022441273  | 6.889600386 | 0.181910544  | 0.859513867 | 0.859513867 | -5.615895269 |
| 1448239_at   | 0.015433131  | 6.837254308 | 0.181908595  | 0.859515354 | 0.859515354 | -5.61589561  |
| 1434376_at   | 0.028015352  | 9.128014096 | 0.181818812  | 0.859583852 | 0.859583852 | -5.615911341 |
| 1434597_at   | 0.014950385  | 10.03796087 | 0.181814828  | 0.859586892 | 0.859586892 | -5.615912039 |
| 1416875_at   | 0.014607937  | 5.174205581 | 0.181785208  | 0.85960949  | 0.85960949  | -5.615917226 |
| 1429351_at   | -0.023078502 | 7.531067351 | -0.181779663 | 0.85961372  | 0.85961372  | -5.615918197 |
| 1452179_at   | 0.031306404  | 5.701758294 | 0.181663621  | 0.859702255 | 0.859702255 | -5.615938513 |
| 1453701_at   | 0.021282806  | 3.322254486 | 0.181646304  | 0.859715466 | 0.859715466 | -5.615941544 |
| 1425564_at   | -0.026249134 | 4.68864203  | -0.18163557  | 0.859723656 | 0.859723656 | -5.615943422 |

|              |              |             |              |             |             |              |
|--------------|--------------|-------------|--------------|-------------|-------------|--------------|
| 1446020_at   | 0.01755843   | 4.386186005 | 0.181596216  | 0.859753682 | 0.859753682 | -5.615950308 |
| 1459219_at   | -0.013748744 | 7.155423384 | -0.181553564 | 0.859786225 | 0.859786225 | -5.615957769 |
| 1415736_at   | 0.01896931   | 10.37039201 | 0.181536392  | 0.859799326 | 0.859799326 | -5.615960773 |
| 1451743_at   | -0.021172793 | 6.932222026 | -0.18151735  | 0.859813855 | 0.859813855 | -5.615964103 |
| 1451557_at   | -0.015013548 | 5.251012888 | -0.181477648 | 0.859844147 | 0.859844147 | -5.615971045 |
| 1437348_at   | 0.011521662  | 8.917224577 | 0.181406724  | 0.859898262 | 0.859898262 | -5.615983443 |
| 1452262_at   | 0.01584826   | 8.901418089 | 0.181399598  | 0.859903699 | 0.859903699 | -5.615984688 |
| 1443962_at   | -0.021205098 | 6.69595266  | -0.181371995 | 0.85992476  | 0.85992476  | -5.615989512 |
| 1435783_at   | 0.020998201  | 4.902812183 | 0.181346902  | 0.859943906 | 0.859943906 | -5.615993897 |
| 1434018_at   | 0.012013616  | 10.29165995 | 0.181327897  | 0.859958407 | 0.859958407 | -5.615997217 |
| 1455680_at   | -0.016329947 | 8.089766295 | -0.181309841 | 0.859972184 | 0.859972184 | -5.616000371 |
| 1442189_at   | 0.019893682  | 3.609657505 | 0.181296471  | 0.859982386 | 0.859982386 | -5.616002706 |
| 1423924_s_at | 0.012085613  | 9.465735696 | 0.181268513  | 0.860003718 | 0.860003718 | -5.616007589 |
| 1441548_at   | 0.011980908  | 5.724186253 | 0.181232909  | 0.860030885 | 0.860030885 | -5.616013806 |
| 1423546_at   | -0.01836117  | 6.089412193 | -0.181226692 | 0.860035629 | 0.860035629 | -5.616014892 |
| 1416579_a_at | 0.015176787  | 10.03740342 | 0.181146425  | 0.860096875 | 0.860096875 | -5.616028903 |
| 1446315_at   | -0.014577763 | 4.12992879  | -0.181140511 | 0.860101387 | 0.860101387 | -5.616029935 |
| 1449940_a_at | -0.012962679 | 9.23187692  | -0.181104075 | 0.86012919  | 0.86012919  | -5.616036294 |
| 1432285_at   | -0.011012333 | 6.34471006  | -0.181084773 | 0.860143918 | 0.860143918 | -5.616039661 |
| 1432997_at   | -0.01307955  | 4.550788991 | -0.181083915 | 0.860144573 | 0.860144573 | -5.616039811 |
| 1449948_at   | 0.013513047  | 4.216967751 | 0.181042023  | 0.860176538 | 0.860176538 | -5.616047119 |
| 1458369_at   | -0.01199712  | 5.539815798 | -0.180994945 | 0.860212462 | 0.860212462 | -5.616055329 |
| 1424351_at   | -0.025267402 | 9.06311932  | -0.180945535 | 0.860250165 | 0.860250165 | -5.616063944 |
| 1417099_at   | -0.012479433 | 9.059163706 | -0.180933133 | 0.860259629 | 0.860259629 | -5.616066106 |
| 1424702_a_at | -0.011522832 | 7.449989326 | -0.180922784 | 0.860267525 | 0.860267525 | -5.61606791  |
| 1430451_at   | 0.016045291  | 5.240922434 | 0.18090656   | 0.860279906 | 0.860279906 | -5.616070738 |
| 1432880_at   | -0.02277462  | 3.648606438 | -0.180886131 | 0.860295494 | 0.860295494 | -5.616074298 |
| 1420575_at   | -0.015107416 | 5.270724401 | -0.180885079 | 0.860296297 | 0.860296297 | -5.616074481 |
| 1422453_at   | -0.015115634 | 11.16156763 | -0.180868117 | 0.86030924  | 0.86030924  | -5.616077437 |
| 1445874_at   | -0.02892772  | 4.713654659 | -0.180864151 | 0.860312267 | 0.860312267 | -5.616078128 |
| 1427207_s_at | 0.013561485  | 8.166557025 | 0.180818745  | 0.860346916 | 0.860346916 | -5.61608604  |
| 1458316_at   | 0.012625086  | 3.128303521 | 0.180781669  | 0.860375208 | 0.860375208 | -5.616092498 |
| 1418964_at   | 0.011226461  | 7.150425406 | 0.180769137  | 0.860384772 | 0.860384772 | -5.616094681 |
| 1432348_at   | 0.01552188   | 5.373589558 | 0.180746527  | 0.860402025 | 0.860402025 | -5.616098618 |
| 1430498_at   | -0.019219349 | 4.798409995 | -0.180737326 | 0.860409047 | 0.860409047 | -5.61610022  |
| 1459222_x_at | -0.021094431 | 4.446354119 | -0.180732661 | 0.860412606 | 0.860412606 | -5.616101033 |
| 1423717_at   | -0.015145302 | 9.796939986 | -0.180695626 | 0.860440868 | 0.860440868 | -5.616107481 |
| 1432984_at   | -0.022618246 | 3.470322965 | -0.180677824 | 0.860454452 | 0.860454452 | -5.61611058  |
| 1453522_at   | -0.025212137 | 5.349088552 | -0.180660181 | 0.860467916 | 0.860467916 | -5.616113651 |
| 1444290_at   | 0.017942578  | 3.932659253 | 0.18060989   | 0.860506294 | 0.860506294 | -5.616122403 |
| 1422161_at   | -0.017248702 | 3.56114729  | -0.180552374 | 0.860550186 | 0.860550186 | -5.61613241  |
| 1446007_at   | 0.025512219  | 6.687868816 | 0.180437396  | 0.86063793  | 0.86063793  | -5.616152405 |
| 1459136_at   | -0.015132957 | 3.236582966 | -0.180427514 | 0.860645471 | 0.860645471 | -5.616154122 |
| 1455702_at   | -0.019290252 | 5.433351112 | -0.180426639 | 0.860646139 | 0.860646139 | -5.616154275 |
| 1452850_s_at | 0.013377877  | 9.226584472 | 0.180420362  | 0.86065093  | 0.86065093  | -5.616155366 |
| 1454690_at   | -0.014477949 | 7.605538402 | -0.180409406 | 0.86065929  | 0.86065929  | -5.61615727  |
| 1418616_at   | -0.016031292 | 7.390591449 | -0.180378394 | 0.860682957 | 0.860682957 | -5.61616266  |
| 1440715_s_at | 0.01626873   | 8.889388636 | 0.180330462  | 0.860719538 | 0.860719538 | -5.616170989 |
| 1454458_at   | 0.017253197  | 4.341791749 | 0.180270692  | 0.860765152 | 0.860765152 | -5.616181372 |
| 1441080_at   | -0.017058655 | 4.618351288 | -0.180223425 | 0.860801225 | 0.860801225 | -5.61618958  |
| 1415743_at   | -0.018167632 | 8.585997613 | -0.180211032 | 0.860810683 | 0.860810683 | -5.616191732 |
| 1446502_at   | -0.0163749   | 3.144466076 | -0.180133721 | 0.860869685 | 0.860869685 | -5.616205153 |
| 1416731_at   | 0.01269328   | 10.47843482 | 0.180132078  | 0.860870939 | 0.860870939 | -5.616205438 |



|              |              |             |              |             |             |              |
|--------------|--------------|-------------|--------------|-------------|-------------|--------------|
| 1458705_at   | -0.013593443 | 3.407550158 | -0.180118571 | 0.860881248 | 0.860881248 | -5.616207782 |
| 1455564_at   | 0.014844823  | 7.771024979 | 0.180074217  | 0.860915099 | 0.860915099 | -5.616215478 |
| 1421548_at   | 0.018294913  | 4.102995482 | 0.180061935  | 0.860924472 | 0.860924472 | -5.616217609 |
| 1443445_at   | -0.01675161  | 4.778287938 | -0.180047977 | 0.860935125 | 0.860935125 | -5.61622003  |
| 1460048_at   | 0.027790563  | 4.437969095 | 0.180024792  | 0.860952821 | 0.860952821 | -5.616224052 |
| 1441821_at   | -0.013754235 | 4.023814906 | -0.180014138 | 0.860960952 | 0.860960952 | -5.6162259   |
| 1419713_at   | -0.011802553 | 4.33294547  | -0.180012714 | 0.860962039 | 0.860962039 | -5.616226147 |
| 1460253_at   | 0.01418483   | 8.647389857 | 0.180010642  | 0.86096362  | 0.86096362  | -5.616226506 |
| 1422855_at   | 0.011523347  | 9.469900261 | 0.179941618  | 0.861016301 | 0.861016301 | -5.616238475 |
| 1436547_at   | -0.012698809 | 6.291010749 | -0.179913777 | 0.861037549 | 0.861037549 | -5.616243302 |
| 1422009_at   | -0.018439831 | 5.091342758 | -0.17982395  | 0.861106108 | 0.861106108 | -5.616258869 |
| 1439835_x_at | 0.014940692  | 3.747456396 | 0.179796207  | 0.861127283 | 0.861127283 | -5.616263675 |
| 1436358_at   | -0.012951901 | 8.591587613 | -0.179778449 | 0.861140836 | 0.861140836 | -5.616266751 |
| 1437576_at   | 0.012721549  | 7.914752552 | 0.179767899  | 0.861148888 | 0.861148888 | -5.616268579 |
| 1453313_at   | -0.019414248 | 8.960679136 | -0.179718432 | 0.861186644 | 0.861186644 | -5.616277145 |
| 1416683_at   | -0.014673566 | 10.27478843 | -0.179709918 | 0.861193143 | 0.861193143 | -5.61627862  |
| 1428447_at   | 0.015417188  | 6.973720033 | 0.179696493  | 0.861203389 | 0.861203389 | -5.616280944 |
| 1428569_at   | 0.01700899   | 3.374026657 | 0.179665141  | 0.861227319 | 0.861227319 | -5.616286372 |
| 1432039_a_at | 0.014039087  | 3.499260084 | 0.179625015  | 0.861257946 | 0.861257946 | -5.616293317 |
| 1429504_at   | 0.025213586  | 7.476863502 | 0.179616944  | 0.861264107 | 0.861264107 | -5.616294714 |
| 1420041_at   | 0.017388569  | 4.087711858 | 0.1796023    | 0.861275284 | 0.861275284 | -5.616297248 |
| 1448338_at   | 0.019458674  | 3.312899475 | 0.179539512  | 0.861323209 | 0.861323209 | -5.616308112 |
| 1425393_a_at | 0.030888434  | 5.531204626 | 0.179504018  | 0.8613503   | 0.8613503   | -5.616314251 |
| 1452133_at   | 0.012624869  | 11.12050409 | 0.179500546  | 0.861352951 | 0.861352951 | -5.616314851 |
| 1424087_at   | -0.012840127 | 8.974383853 | -0.179493284 | 0.861358494 | 0.861358494 | -5.616316107 |
| 1421587_at   | -0.016079244 | 3.711521229 | -0.179490407 | 0.86136069  | 0.86136069  | -5.616316605 |
| 1422778_at   | 0.013044246  | 11.06883068 | 0.179392107  | 0.861435722 | 0.861435722 | -5.6163336   |
| 1437300_at   | 0.012697336  | 7.367052172 | 0.179377911  | 0.861446558 | 0.861446558 | -5.616336054 |
| 1451235_at   | -0.015582699 | 5.526215934 | -0.179358491 | 0.861461381 | 0.861461381 | -5.61633941  |
| 1455422_x_at | -0.024384169 | 5.04945705  | -0.179329048 | 0.861483856 | 0.861483856 | -5.616344498 |
| 1437124_at   | 0.015427672  | 7.637945078 | 0.17919813   | 0.861583789 | 0.861583789 | -5.61636711  |
| 1456611_at   | -0.013847377 | 6.484886147 | -0.179187416 | 0.861591967 | 0.861591967 | -5.61636896  |
| 1457884_at   | 0.011625309  | 5.293403108 | 0.179138014  | 0.861629677 | 0.861629677 | -5.616377488 |
| 1433731_at   | -0.013189232 | 8.569933076 | -0.179130299 | 0.861635567 | 0.861635567 | -5.61637882  |
| 1448714_at   | 0.011919261  | 7.039356268 | 0.179080111  | 0.861673878 | 0.861673878 | -5.616387481 |
| 1429570_at   | 0.016163454  | 3.808609443 | 0.179078332  | 0.861675236 | 0.861675236 | -5.616387788 |
| 1444357_at   | 0.017369293  | 4.301204136 | 0.179068878  | 0.861682453 | 0.861682453 | -5.616389419 |
| 1433865_at   | 0.012904191  | 3.124634144 | 0.179041933  | 0.861703021 | 0.861703021 | -5.616394067 |
| 1453419_at   | -0.016645791 | 7.918635846 | -0.179040329 | 0.861704245 | 0.861704245 | -5.616394344 |
| 1416550_at   | -0.014237696 | 8.037482824 | -0.179019963 | 0.861719792 | 0.861719792 | -5.616397857 |
| 1436516_at   | 0.014532271  | 8.014958931 | 0.179018461  | 0.861720939 | 0.861720939 | -5.616398116 |
| 1433559_at   | 0.017071934  | 8.279733892 | 0.179017223  | 0.861721883 | 0.861721883 | -5.61639833  |
| 1438363_at   | -0.026746029 | 5.79010011  | -0.179016506 | 0.861722431 | 0.861722431 | -5.616398454 |
| 1451076_s_at | 0.01462163   | 10.15395074 | 0.178986129  | 0.861745619 | 0.861745619 | -5.616403693 |
| 1435169_at   | 0.020448691  | 6.427148877 | 0.17892999   | 0.861788475 | 0.861788475 | -5.616413373 |
| 1436051_at   | -0.013759703 | 8.52433374  | -0.178901183 | 0.861810465 | 0.861810465 | -5.616418339 |
| 1424806_s_at | -0.013897241 | 8.826731664 | -0.178867733 | 0.861836    | 0.861836    | -5.616424104 |
| 1446756_at   | -0.011170206 | 3.33385649  | -0.178845209 | 0.861853195 | 0.861853195 | -5.616427986 |
| 1420449_at   | 0.011673775  | 3.420886397 | 0.178817337  | 0.861874472 | 0.861874472 | -5.616432789 |
| 1450933_at   | 0.010982082  | 8.527183251 | 0.178740564  | 0.861933081 | 0.861933081 | -5.616446013 |
| 1438927_x_at | 0.010872438  | 3.495064674 | 0.178714232  | 0.861953182 | 0.861953182 | -5.616450548 |
| 1423405_at   | 0.011419234  | 3.572278135 | 0.17871003   | 0.86195639  | 0.86195639  | -5.616451272 |
| 1424681_a_at | 0.011092212  | 10.91548782 | 0.178679667  | 0.861979569 | 0.861979569 | -5.616456499 |

|              |              |             |              |             |             |              |
|--------------|--------------|-------------|--------------|-------------|-------------|--------------|
| 1455228_at   | 0.01490846   | 7.94128121  | 0.178672095  | 0.86198535  | 0.86198535  | -5.616457803 |
| 1433734_at   | 0.020641571  | 5.221624062 | 0.178660887  | 0.861993906 | 0.861993906 | -5.616459732 |
| 1452776_a_at | 0.014754013  | 7.575657318 | 0.178639024  | 0.862010597 | 0.862010597 | -5.616463496 |
| 1435890_at   | -0.013604508 | 8.350961362 | -0.178545206 | 0.86208222  | 0.86208222  | -5.61647964  |
| 1459883_at   | -0.018204207 | 5.132895752 | -0.178544454 | 0.862082794 | 0.862082794 | -5.616479769 |
| 1445416_at   | -0.015295827 | 4.667445706 | -0.17849532  | 0.862120305 | 0.862120305 | -5.616488221 |
| 1433153_at   | -0.011970513 | 3.628996804 | -0.178483871 | 0.862129045 | 0.862129045 | -5.61649019  |
| 1451380_at   | -0.011655647 | 8.065551476 | -0.178444439 | 0.86215915  | 0.86215915  | -5.616496971 |
| 1457595_at   | 0.016170153  | 3.801671656 | 0.178326683  | 0.862249052 | 0.862249052 | -5.616517211 |
| 1437789_at   | -0.016046494 | 5.706830217 | -0.178272021 | 0.862290784 | 0.862290784 | -5.616526602 |
| 1447457_at   | -0.016450913 | 3.499421361 | -0.178261119 | 0.862299108 | 0.862299108 | -5.616528475 |
| 1439286_at   | -0.012658538 | 3.434417317 | -0.178254525 | 0.862304142 | 0.862304142 | -5.616529607 |
| 1455532_at   | 0.017415985  | 7.66050579  | 0.178207746  | 0.862339857 | 0.862339857 | -5.616537641 |
| 1445680_x_at | -0.015520513 | 3.228784278 | -0.178177679 | 0.862362813 | 0.862362813 | -5.616542803 |
| 1428458_at   | -0.012113947 | 6.258290424 | -0.178175533 | 0.862364451 | 0.862364451 | -5.616543172 |
| 1437625_at   | -0.014822061 | 4.284981638 | -0.178164799 | 0.862372646 | 0.862372646 | -5.616545014 |
| 1426109_a_at | -0.012421164 | 6.108152459 | -0.178156849 | 0.862378716 | 0.862378716 | -5.616546379 |
| 1431983_at   | -0.013620781 | 3.584388851 | -0.178081274 | 0.862436417 | 0.862436417 | -5.61655935  |
| 1427455_x_at | -0.012343579 | 4.414492837 | -0.178021497 | 0.862482058 | 0.862482058 | -5.616569606 |
| 1431795_a_at | -0.024464723 | 5.220925792 | -0.177989369 | 0.862506588 | 0.862506588 | -5.616575116 |
| 1442416_at   | 0.021120486  | 6.73632451  | 0.177988347  | 0.862507368 | 0.862507368 | -5.616575291 |
| 1455536_at   | 0.02019752   | 4.948090944 | 0.177921774  | 0.862558198 | 0.862558198 | -5.616586707 |
| 1425421_at   | 0.016647466  | 6.963327467 | 0.17782604   | 0.862631294 | 0.862631294 | -5.616603115 |
| 1442098_at   | 0.015921077  | 7.622070505 | 0.177825529  | 0.862631684 | 0.862631684 | -5.616603203 |
| 1436179_a_at | 0.022908583  | 9.394674492 | 0.177803187  | 0.862648743 | 0.862648743 | -5.61660703  |
| 1424170_at   | -0.011814418 | 10.48631348 | -0.177788857 | 0.862659685 | 0.862659685 | -5.616609486 |
| 1445253_at   | -0.014679183 | 4.507809725 | -0.177726524 | 0.862707279 | 0.862707279 | -5.616620162 |
| 1420860_at   | 0.020899811  | 4.755123563 | 0.177681092  | 0.862741969 | 0.862741969 | -5.616627941 |
| 1415893_at   | 0.017400392  | 7.502164732 | 0.177679957  | 0.862742836 | 0.862742836 | -5.616628136 |
| 1451197_s_at | 0.019503316  | 9.454921964 | 0.177663328  | 0.862755533 | 0.862755533 | -5.616630983 |
| 1427076_at   | -0.01770178  | 6.638754165 | -0.177613976 | 0.862793217 | 0.862793217 | -5.61663943  |
| 1444263_at   | 0.018101984  | 3.617296041 | 0.177585558  | 0.862814916 | 0.862814916 | -5.616644293 |
| 1460019_at   | 0.018561812  | 3.442885278 | 0.177583353  | 0.8628166   | 0.8628166   | -5.616644671 |
| 1454013_at   | 0.01735902   | 5.87910599  | 0.177581808  | 0.86281778  | 0.86281778  | -5.616644935 |
| 1433850_at   | -0.010677182 | 11.13599067 | -0.177524956 | 0.862861191 | 0.862861191 | -5.616654662 |
| 1451498_at   | -0.021000847 | 5.735846762 | -0.177500907 | 0.862879554 | 0.862879554 | -5.616658775 |
| 1426828_at   | -0.018226891 | 7.945272788 | -0.177474431 | 0.862899771 | 0.862899771 | -5.616663303 |
| 1425794_at   | -0.021547898 | 4.772798048 | -0.177427333 | 0.862935735 | 0.862935735 | -5.616671356 |
| 1425583_at   | 0.012874223  | 3.427214673 | 0.177410728  | 0.862948414 | 0.862948414 | -5.616674195 |
| 1432736_at   | -0.012743589 | 4.803500424 | -0.177371508 | 0.862978363 | 0.862978363 | -5.616680899 |
| 1445198_at   | -0.039077186 | 5.977158691 | -0.17736211  | 0.862985539 | 0.862985539 | -5.616682505 |
| 1424032_at   | -0.013900252 | 6.453607441 | -0.177351044 | 0.862993989 | 0.862993989 | -5.616684397 |
| 1417987_at   | -0.011774537 | 8.042890289 | -0.177347375 | 0.862996792 | 0.862996792 | -5.616685024 |
| 1423133_at   | -0.011933963 | 9.443783461 | -0.177336159 | 0.863005356 | 0.863005356 | -5.61668694  |
| 1415965_at   | 0.012202642  | 6.325504678 | 0.177333483  | 0.863007399 | 0.863007399 | -5.616687397 |
| 1448576_at   | -0.012997505 | 3.542873886 | -0.17730369  | 0.86303015  | 0.86303015  | -5.616692488 |
| 1447617_at   | -0.012463892 | 3.18253604  | -0.177253081 | 0.863068796 | 0.863068796 | -5.616701133 |
| 1450412_at   | -0.021063762 | 7.297759079 | -0.177237393 | 0.863080776 | 0.863080776 | -5.616703813 |
| 1431893_a_at | 0.015727632  | 6.654861566 | 0.177223283  | 0.863091551 | 0.863091551 | -5.616706222 |
| 1423466_at   | -0.015100095 | 4.032500136 | -0.177161989 | 0.863138357 | 0.863138357 | -5.616716688 |
| 1444362_at   | -0.017265234 | 3.379953356 | -0.177089575 | 0.863193656 | 0.863193656 | -5.616729047 |
| 1442860_at   | 0.013396221  | 3.024718893 | 0.17705994   | 0.863216286 | 0.863216286 | -5.616734104 |
| 1441268_at   | -0.02904649  | 6.330692182 | -0.177031849 | 0.863237738 | 0.863237738 | -5.616738896 |

|              |              |             |              |             |             |              |
|--------------|--------------|-------------|--------------|-------------|-------------|--------------|
| 1429358_at   | 0.016120882  | 4.385180018 | 0.17698537   | 0.863273233 | 0.863273233 | -5.616746824 |
| 1439018_at   | -0.014214317 | 7.152183276 | -0.176945895 | 0.863303379 | 0.863303379 | -5.616753556 |
| 1453323_at   | -0.016468676 | 4.541188352 | -0.176926005 | 0.863318568 | 0.863318568 | -5.616756947 |
| 1438595_at   | -0.015105522 | 6.309957306 | -0.176889632 | 0.863346345 | 0.863346345 | -5.616763147 |
| 1453062_at   | 0.014445728  | 6.585427614 | 0.176801761  | 0.863413451 | 0.863413451 | -5.616778121 |
| 1423481_at   | 0.014090851  | 7.547493427 | 0.17679887   | 0.863415659 | 0.863415659 | -5.616778614 |
| 1424707_at   | 0.01190544   | 10.35417417 | 0.176783799  | 0.863427168 | 0.863427168 | -5.616781181 |
| 1425562_s_at | -0.021115054 | 8.567418827 | -0.176753905 | 0.863449998 | 0.863449998 | -5.616786273 |
| 1430773_a_at | 0.016939411  | 3.826326103 | 0.176703984  | 0.863488124 | 0.863488124 | -5.616794775 |
| 1450049_a_at | -0.014463526 | 6.045309377 | -0.176629555 | 0.863544966 | 0.863544966 | -5.616807446 |
| 1441798_at   | -0.017914061 | 4.96112231  | -0.176616889 | 0.86355464  | 0.86355464  | -5.616809601 |
| 1437740_at   | -0.015654317 | 6.573844623 | -0.176572254 | 0.863588728 | 0.863588728 | -5.616817197 |
| 1428621_a_at | 0.013185273  | 9.577525147 | 0.176534896  | 0.863617259 | 0.863617259 | -5.616823552 |
| 1423120_at   | 0.011900377  | 9.125791937 | 0.176504893  | 0.863640174 | 0.863640174 | -5.616828656 |
| 1445195_at   | 0.012831032  | 3.349700666 | 0.176464676  | 0.863670889 | 0.863670889 | -5.616835495 |
| 1457509_at   | 0.021268963  | 5.057068203 | 0.176409702  | 0.863712875 | 0.863712875 | -5.616844842 |
| 1416956_at   | 0.02451278   | 6.053066594 | 0.176401137  | 0.863719417 | 0.863719417 | -5.616846298 |
| 1434526_at   | 0.015220678  | 3.798178024 | 0.176398147  | 0.8637217   | 0.8637217   | -5.616846806 |
| 1439380_x_at | -0.018159973 | 12.89114307 | -0.176398047 | 0.863721777 | 0.863721777 | -5.616846823 |
| 1437481_at   | 0.018032373  | 6.440209862 | 0.176380043  | 0.863735528 | 0.863735528 | -5.616849884 |
| 1436114_at   | 0.014315984  | 5.78096757  | 0.176367502  | 0.863745106 | 0.863745106 | -5.616852015 |
| 1439005_x_at | 0.0215626    | 7.910776526 | 0.176307529  | 0.863790911 | 0.863790911 | -5.616862206 |
| 1420534_at   | 0.031677292  | 6.429987436 | 0.176298603  | 0.863797728 | 0.863797728 | -5.616863722 |
| 1429558_a_at | -0.014481358 | 9.536819227 | -0.176286441 | 0.863807018 | 0.863807018 | -5.616865788 |
| 1430481_at   | 0.013151103  | 4.532111126 | 0.176284986  | 0.863808128 | 0.863808128 | -5.616866035 |
| 1458413_at   | 0.017286564  | 4.060213073 | 0.176276178  | 0.863814856 | 0.863814856 | -5.616867532 |
| 1417163_at   | -0.017855639 | 4.866578416 | -0.176263228 | 0.863824747 | 0.863824747 | -5.616869732 |
| 1416392_a_at | -0.011134912 | 11.73271714 | -0.17625939  | 0.863827678 | 0.863827678 | -5.616870383 |
| 1434294_at   | -0.026681757 | 7.914013689 | -0.176257533 | 0.863829097 | 0.863829097 | -5.616870699 |
| 1448909_a_at | 0.017717932  | 10.54360112 | 0.176255198  | 0.86383088  | 0.86383088  | -5.616871095 |
| 1432828_at   | -0.017144085 | 4.524918938 | -0.176210488 | 0.863865029 | 0.863865029 | -5.616878688 |
| 1438195_at   | 0.01099285   | 7.657742182 | 0.176200055  | 0.863872997 | 0.863872997 | -5.61688046  |
| 1429294_at   | 0.014999724  | 7.839300546 | 0.176185234  | 0.863884317 | 0.863884317 | -5.616882976 |
| 1457098_at   | 0.016299185  | 4.024391171 | 0.17616367   | 0.863900787 | 0.863900787 | -5.616886637 |
| 1438841_s_at | 0.021947432  | 3.477577127 | 0.176152702  | 0.863909165 | 0.863909165 | -5.616888499 |
| 1441013_at   | 0.012438267  | 7.826539778 | 0.176130735  | 0.863925943 | 0.863925943 | -5.616892227 |
| 1431958_at   | -0.011611235 | 3.591597205 | -0.176048499 | 0.863988755 | 0.863988755 | -5.616906182 |
| 1430428_at   | -0.017391983 | 5.822103622 | -0.176047437 | 0.863989566 | 0.863989566 | -5.616906362 |
| 1438072_at   | 0.014906336  | 9.618483449 | 0.176046899  | 0.863989977 | 0.863989977 | -5.616906453 |
| 1430712_at   | 0.014478008  | 5.918315321 | 0.175980016  | 0.864041063 | 0.864041063 | -5.616917798 |
| 1426936_at   | 0.147010761  | 6.096869899 | 0.175967801  | 0.864050393 | 0.864050393 | -5.616919869 |
| 1441053_at   | -0.014964887 | 4.587141644 | -0.175959258 | 0.864056918 | 0.864056918 | -5.616921318 |
| 1423403_at   | -0.018120763 | 8.047020691 | -0.175949084 | 0.864064689 | 0.864064689 | -5.616923043 |
| 1419695_at   | 0.012942289  | 4.313500187 | 0.175913587  | 0.864091803 | 0.864091803 | -5.616929061 |
| 1453147_at   | 0.013412057  | 7.188993316 | 0.1758905    | 0.864109437 | 0.864109437 | -5.616932974 |
| 1446342_at   | 0.012499397  | 3.963617731 | 0.175827713  | 0.864157396 | 0.864157396 | -5.616943614 |
| 1451250_at   | -0.013017143 | 5.884556687 | -0.175824374 | 0.864159946 | 0.864159946 | -5.61694418  |
| 1418692_at   | -0.012511397 | 9.159413248 | -0.175812916 | 0.864168698 | 0.864168698 | -5.616946121 |
| 1453154_at   | -0.01308373  | 3.843964541 | -0.175761764 | 0.86420777  | 0.86420777  | -5.616954786 |
| 1447630_x_at | -0.015421762 | 3.43223623  | -0.175754099 | 0.864213625 | 0.864213625 | -5.616956085 |
| 1456374_x_at | -0.012213063 | 11.78835086 | -0.17572157  | 0.864238472 | 0.864238472 | -5.616961593 |
| 1434707_at   | -0.020157449 | 8.590874076 | -0.175719249 | 0.864240246 | 0.864240246 | -5.616961987 |
| 1427049_s_at | 0.019251731  | 10.22361953 | 0.175690087  | 0.864262521 | 0.864262521 | -5.616966924 |

|                  |              |             |              |             |             |              |
|------------------|--------------|-------------|--------------|-------------|-------------|--------------|
| 1444652_at       | 0.016024485  | 3.381125793 | 0.175685159  | 0.864266286 | 0.864266286 | -5.616967759 |
| 1433270_at       | 0.011212396  | 6.30690603  | 0.175678591  | 0.864271302 | 0.864271302 | -5.61696887  |
| 1448705_at       | 0.015149186  | 8.031422293 | 0.175675015  | 0.864274034 | 0.864274034 | -5.616969476 |
| 1446505_at       | 0.014325343  | 3.852932348 | 0.175670667  | 0.864277355 | 0.864277355 | -5.616970212 |
| 1456092_at       | 0.015313005  | 5.359943663 | 0.175655647  | 0.864288829 | 0.864288829 | -5.616972754 |
| 1443209_at       | 0.0142494    | 3.469643444 | 0.175653475  | 0.864290488 | 0.864290488 | -5.616973122 |
| 1417021_a_at     | -0.026914797 | 5.355792265 | -0.175651392 | 0.864292079 | 0.864292079 | -5.616973475 |
| 1416049_at       | 0.01734309   | 5.17525185  | 0.175634892  | 0.864304682 | 0.864304682 | -5.616976267 |
| 1445659_at       | 0.027823975  | 3.731711599 | 0.175622978  | 0.864313783 | 0.864313783 | -5.616978284 |
| 1417835_at       | 0.013438731  | 3.379217615 | 0.175575186  | 0.864350291 | 0.864350291 | -5.616986371 |
| 1460100_at       | -0.014730882 | 3.938633254 | -0.175548732 | 0.864370498 | 0.864370498 | -5.616990847 |
| 1459797_at       | -0.016468855 | 4.366425163 | -0.17544659  | 0.864448523 | 0.864448523 | -5.617008121 |
| 1442165_at       | -0.013740131 | 5.538443562 | -0.175429418 | 0.86446164  | 0.86446164  | -5.617011024 |
| 1448672_a_at     | 0.01250648   | 8.495753049 | 0.175421842  | 0.864467428 | 0.864467428 | -5.617012305 |
| 1441436_at       | 0.015794614  | 5.244648074 | 0.175351012  | 0.864521535 | 0.864521535 | -5.617024276 |
| 1432717_at       | -0.01567522  | 4.596334042 | -0.175313639 | 0.864550085 | 0.864550085 | -5.617030591 |
| 1456159_at       | -0.020470115 | 8.335476996 | -0.175270664 | 0.864582914 | 0.864582914 | -5.61703785  |
| 1428720_s_at     | -0.019047249 | 3.674465643 | -0.175209496 | 0.864629642 | 0.864629642 | -5.61704818  |
| 1418200_at       | -0.014119657 | 6.961537426 | -0.175112316 | 0.864703881 | 0.864703881 | -5.617064584 |
| 1424198_at       | 0.016215127  | 9.17718041  | 0.175044395  | 0.864755769 | 0.864755769 | -5.617076044 |
| 1417206_at       | 0.011674575  | 8.310763468 | 0.175003995  | 0.864786634 | 0.864786634 | -5.617082858 |
| 1454413_at       | -0.013868372 | 3.245766317 | -0.17500083  | 0.864789051 | 0.864789051 | -5.617083392 |
| 1444434_at       | -0.015253648 | 4.320795872 | -0.174931817 | 0.864841775 | 0.864841775 | -5.617095028 |
| 1425727_at       | 0.016440699  | 3.848225957 | 0.174828302  | 0.864920858 | 0.864920858 | -5.617112473 |
| 1460284_at       | -0.020539158 | 5.522367792 | -0.174821702 | 0.8649259   | 0.8649259   | -5.617113585 |
| 1454114_a_at     | 0.018468657  | 3.273661537 | 0.174788206  | 0.864951491 | 0.864951491 | -5.617119228 |
| 1418768_at       | 0.011383401  | 7.298338686 | 0.174746375  | 0.86498345  | 0.86498345  | -5.617126273 |
| 1454469_at       | 0.016479875  | 3.469362524 | 0.174711034  | 0.86501045  | 0.86501045  | -5.617132224 |
| AFFX-MURINE_B2_ε | 0.011234249  | 14.12062518 | 0.174669364  | 0.865042286 | 0.865042286 | -5.617139239 |
| 1453222_at       | -0.019946235 | 7.58242903  | -0.174658193 | 0.865050821 | 0.865050821 | -5.61714112  |
| 1441412_s_at     | 0.0123133    | 7.21514994  | 0.174634604  | 0.865068844 | 0.865068844 | -5.61714509  |
| 1446090_at       | -0.012562189 | 6.841022852 | -0.174622396 | 0.865078171 | 0.865078171 | -5.617147144 |
| 1459810_at       | 0.018476423  | 3.431560618 | 0.174605088  | 0.865091394 | 0.865091394 | -5.617150057 |
| 1433935_at       | -0.013800042 | 8.555003548 | -0.174568897 | 0.865119045 | 0.865119045 | -5.617156146 |
| 1415762_x_at     | 0.012403081  | 9.390555818 | 0.174561434  | 0.865124747 | 0.865124747 | -5.617157401 |
| 1425268_a_at     | -0.014183459 | 7.0637253   | -0.174560383 | 0.86512555  | 0.86512555  | -5.617157578 |
| 1421792_s_at     | 0.020898181  | 5.894042787 | 0.174545428  | 0.865136976 | 0.865136976 | -5.617160094 |
| 1439407_x_at     | 0.015452388  | 9.03601591  | 0.174545078  | 0.865137243 | 0.865137243 | -5.617160153 |
| 1428868_a_at     | 0.012509879  | 12.49589245 | 0.17450715   | 0.865166221 | 0.865166221 | -5.617166532 |
| 1440204_at       | 0.015570739  | 4.087692836 | 0.174494356  | 0.865175996 | 0.865175996 | -5.617168683 |
| 1418960_at       | 0.014302146  | 7.452430094 | 0.174457864  | 0.865203877 | 0.865203877 | -5.617174819 |
| 1452723_at       | -0.014100438 | 3.941901362 | -0.174440333 | 0.865217272 | 0.865217272 | -5.617177767 |
| 1435319_at       | 0.024253455  | 7.873801055 | 0.174298837  | 0.865325382 | 0.865325382 | -5.617201544 |
| 1440954_at       | 0.014975755  | 8.804684494 | 0.17427196   | 0.865345918 | 0.865345918 | -5.617206058 |
| 1452598_at       | 0.015193248  | 8.179621295 | 0.174226439  | 0.8653807   | 0.8653807   | -5.617213702 |
| 1435863_at       | 0.013576815  | 7.519406922 | 0.174142521  | 0.86544482  | 0.86544482  | -5.617227789 |
| 1455710_x_at     | -0.010579832 | 6.875640782 | -0.174115258 | 0.865465651 | 0.865465651 | -5.617232364 |
| 1457964_at       | 0.012389155  | 4.139114785 | 0.174073216  | 0.865497775 | 0.865497775 | -5.617239418 |
| 1460147_at       | -0.022758397 | 3.521008438 | -0.174047859 | 0.865517151 | 0.865517151 | -5.617243672 |
| 1446916_at       | 0.012657698  | 3.097093192 | 0.174018623  | 0.865539489 | 0.865539489 | -5.617248575 |
| 1426037_a_at     | 0.023624533  | 5.461796492 | 0.174002045  | 0.865552157 | 0.865552157 | -5.617251355 |
| 1458891_at       | -0.011500307 | 4.797908325 | -0.173992903 | 0.865559142 | 0.865559142 | -5.617252888 |
| 1417226_at       | 0.012191216  | 7.378277692 | 0.173963985  | 0.865581239 | 0.865581239 | -5.617257737 |

|              |              |             |              |             |             |              |
|--------------|--------------|-------------|--------------|-------------|-------------|--------------|
| 1420287_at   | -0.020288115 | 7.162348471 | -0.173947037 | 0.865594189 | 0.865594189 | -5.617260578 |
| 1433101_at   | -0.012210822 | 7.633758121 | -0.173922362 | 0.865613044 | 0.865613044 | -5.617264714 |
| 1436100_at   | 0.014704085  | 4.352868039 | 0.173904523  | 0.865626675 | 0.865626675 | -5.617267704 |
| 1440615_at   | 0.019866045  | 4.143925097 | 0.173886181  | 0.865640691 | 0.865640691 | -5.617270778 |
| 1450250_at   | 0.014010483  | 5.278325614 | 0.17388581   | 0.865640974 | 0.865640974 | -5.61727084  |
| 1434402_at   | -0.013821048 | 7.773197655 | -0.173857195 | 0.865662839 | 0.865662839 | -5.617275635 |
| 1447170_at   | -0.012792037 | 3.246628173 | -0.173846059 | 0.865671349 | 0.865671349 | -5.617277501 |
| 1438185_at   | 0.016428041  | 3.874239348 | 0.173808838  | 0.865699791 | 0.865699791 | -5.617283736 |
| 1453756_at   | -0.012818564 | 4.500888004 | -0.173757994 | 0.865738643 | 0.865738643 | -5.617292252 |
| 1445782_at   | 0.014652267  | 3.326500411 | 0.173720407  | 0.865767365 | 0.865767365 | -5.617298545 |
| 1450389_s_at | -0.015007159 | 3.725535581 | -0.173684123 | 0.865795091 | 0.865795091 | -5.617304619 |
| 1451179_a_at | 0.016280445  | 11.40993524 | 0.173637358  | 0.865830827 | 0.865830827 | -5.617312446 |
| 1423054_at   | -0.014008158 | 9.055159634 | -0.173630989 | 0.865835694 | 0.865835694 | -5.617313512 |
| 1451244_a_at | 0.010561833  | 10.20575095 | 0.173608897  | 0.865852576 | 0.865852576 | -5.617317208 |
| 1450660_at   | 0.019172465  | 7.883949681 | 0.173585302  | 0.865870606 | 0.865870606 | -5.617321156 |
| 1445650_at   | -0.013708944 | 3.925947159 | -0.173552507 | 0.865895667 | 0.865895667 | -5.617326642 |
| 1421846_at   | 0.01326058   | 7.817156375 | 0.173512624  | 0.865926145 | 0.865926145 | -5.617333311 |
| 1445977_at   | -0.0133487   | 3.345232821 | -0.173506453 | 0.865930861 | 0.865930861 | -5.617334343 |
| 1442784_at   | -0.012948191 | 4.406810306 | -0.173477041 | 0.865953336 | 0.865953336 | -5.617339261 |
| 1415753_at   | 0.015197985  | 9.748104895 | 0.173443977  | 0.865978604 | 0.865978604 | -5.617344789 |
| 1435930_at   | -0.012500905 | 8.260251904 | -0.17343914  | 0.8659823   | 0.8659823   | -5.617345597 |
| 1420553_x_at | -0.012130232 | 3.084418055 | -0.173434473 | 0.865985866 | 0.865985866 | -5.617346377 |
| 1440429_at   | 0.01541404   | 3.640746586 | 0.173408397  | 0.866005794 | 0.866005794 | -5.617350735 |
| 1422310_at   | 0.014995161  | 4.643016898 | 0.173338628  | 0.866059111 | 0.866059111 | -5.617362393 |
| 1448688_at   | -0.012424973 | 7.862244209 | -0.173299168 | 0.866089267 | 0.866089267 | -5.617368984 |
| 1455658_at   | -0.013302158 | 7.930306404 | -0.173240814 | 0.866133862 | 0.866133862 | -5.617378729 |
| 1431468_at   | 0.013024056  | 3.31701613  | 0.173206454  | 0.86616012  | 0.86616012  | -5.617384465 |
| 1452857_at   | -0.024303142 | 7.994189743 | -0.173202785 | 0.866162924 | 0.866162924 | -5.617385077 |
| 1453145_at   | -0.060784695 | 8.347297284 | -0.173189697 | 0.866172926 | 0.866172926 | -5.617387262 |
| 1458759_at   | 0.015000325  | 3.057572907 | 0.17318182   | 0.866178946 | 0.866178946 | -5.617388577 |
| 1443029_at   | 0.017757815  | 6.570601004 | 0.173178988  | 0.86618111  | 0.86618111  | -5.617389049 |
| 1460707_at   | 0.012841177  | 10.64997298 | 0.173174562  | 0.866184493 | 0.866184493 | -5.617389788 |
| 1458009_at   | -0.014561003 | 3.174667005 | -0.173148871 | 0.866204127 | 0.866204127 | -5.617394076 |
| 1419244_a_at | -0.020782556 | 9.595157785 | -0.173146728 | 0.866205764 | 0.866205764 | -5.617394433 |
| 1449621_s_at | 0.014491693  | 7.241616914 | 0.173141324  | 0.866209895 | 0.866209895 | -5.617395335 |
| 1446303_at   | 0.040211634  | 6.548927876 | 0.17310991   | 0.866233902 | 0.866233902 | -5.617400577 |
| 1421447_at   | -0.014625779 | 3.512210701 | -0.173046246 | 0.866282557 | 0.866282557 | -5.617411196 |
| 1451541_at   | 0.012218835  | 7.921120095 | 0.17304502   | 0.866283494 | 0.866283494 | -5.61741114  |
| 1431919_at   | -0.012359788 | 4.97969276  | -0.173021334 | 0.866301596 | 0.866301596 | -5.61741535  |
| 1441816_at   | 0.026033306  | 6.813424362 | 0.17296552   | 0.866344252 | 0.866344252 | -5.617424656 |
| 1454461_at   | -0.010679977 | 4.54641209  | -0.172954337 | 0.866352799 | 0.866352799 | -5.61742652  |
| 1454083_at   | 0.01362616   | 3.548539954 | 0.172938982  | 0.866364534 | 0.866364534 | -5.61742908  |
| 1455375_at   | 0.010928627  | 6.217629684 | 0.172920914  | 0.866378343 | 0.866378343 | -5.617432091 |
| 1447239_at   | -0.013779375 | 4.567436949 | -0.172914736 | 0.866383064 | 0.866383064 | -5.61743312  |
| 1423500_a_at | 0.0156662    | 5.88170323  | 0.172914403  | 0.866383319 | 0.866383319 | -5.617433176 |
| 1456742_x_at | 0.020610453  | 4.047351954 | 0.172885317  | 0.866405549 | 0.866405549 | -5.617438023 |
| 1452097_a_at | 0.01425605   | 9.34826658  | 0.17285037   | 0.866432258 | 0.866432258 | -5.617443845 |
| 1459612_at   | 0.014445641  | 4.216861881 | 0.172848916  | 0.866433369 | 0.866433369 | -5.617444087 |
| 1421519_a_at | 0.024647026  | 5.781774382 | 0.172837907  | 0.866441783 | 0.866441783 | -5.617445921 |
| 1439495_at   | -0.01458455  | 8.209610975 | -0.17277651  | 0.866488707 | 0.866488707 | -5.617456147 |
| 1432695_at   | 0.012464046  | 3.417833285 | 0.172656675  | 0.866580296 | 0.866580296 | -5.617476094 |
| 1451205_at   | -0.011628425 | 11.78741006 | -0.172618087 | 0.866609789 | 0.866609789 | -5.617482515 |
| 1454953_at   | -0.018008643 | 6.976631421 | -0.172610652 | 0.866615472 | 0.866615472 | -5.617483752 |

|              |              |             |              |             |             |              |
|--------------|--------------|-------------|--------------|-------------|-------------|--------------|
| 1425730_at   | -0.013251509 | 4.351541394 | -0.172476308 | 0.866718154 | 0.866718154 | -5.617506092 |
| 1434498_at   | -0.012512035 | 8.400561511 | -0.172407378 | 0.866770839 | 0.866770839 | -5.617517548 |
| 1432360_a_at | 0.014780295  | 7.396213127 | 0.172398722  | 0.866777455 | 0.866777455 | -5.617518987 |
| 1458216_at   | -0.01196116  | 4.234194027 | -0.172395721 | 0.86677975  | 0.86677975  | -5.617519485 |
| 1454439_at   | 0.020007178  | 4.125696839 | 0.172384866  | 0.866788047 | 0.866788047 | -5.617521289 |
| 1432884_at   | 0.012737913  | 3.556458991 | 0.172362236  | 0.866805344 | 0.866805344 | -5.617525048 |
| 1458640_at   | 0.020541819  | 3.781122004 | 0.172357386  | 0.866809051 | 0.866809051 | -5.617525854 |
| 1455623_at   | 0.014181598  | 4.797863905 | 0.172332638  | 0.866827966 | 0.866827966 | -5.617529965 |
| 1434615_x_at | -0.016578046 | 4.028822001 | -0.172299251 | 0.866853486 | 0.866853486 | -5.61753551  |
| 1456435_at   | 0.015431801  | 4.683131625 | 0.172294404  | 0.866857191 | 0.866857191 | -5.617536314 |
| 1440494_at   | 0.014589941  | 4.505189823 | 0.172256664  | 0.866886038 | 0.866886038 | -5.617542581 |
| 1437420_at   | -0.015536374 | 6.078662406 | -0.172237758 | 0.866900489 | 0.866900489 | -5.617545719 |
| 1433685_a_at | 0.051614804  | 9.687237613 | 0.172215072  | 0.86691783  | 0.86691783  | -5.617549485 |
| 1447983_at   | 0.013788381  | 3.878559993 | 0.172209585  | 0.866922023 | 0.866922023 | -5.617550396 |
| 1429476_s_at | -0.011717266 | 11.33268977 | -0.172204472 | 0.866925931 | 0.866925931 | -5.617551244 |
| 1430812_at   | 0.012238921  | 3.116379488 | 0.172155597  | 0.866963291 | 0.866963291 | -5.617559355 |
| 1422759_a_at | -0.013213979 | 9.043701698 | -0.17214976  | 0.866967753 | 0.866967753 | -5.617560323 |
| 1438817_at   | 0.015403746  | 5.826540574 | 0.172129556  | 0.866983195 | 0.866983195 | -5.617563675 |
| 1452854_at   | 0.012085622  | 8.733718822 | 0.17212869   | 0.866983858 | 0.866983858 | -5.617563819 |
| 1452017_at   | -0.011277783 | 4.419580306 | -0.172121096 | 0.866989662 | 0.866989662 | -5.617565079 |
| 1459785_at   | 0.015157804  | 3.411496125 | 0.1720335    | 0.86705662  | 0.86705662  | -5.617579607 |
| 1430587_at   | -0.014838588 | 3.884946418 | -0.171993405 | 0.867087269 | 0.867087269 | -5.617586254 |
| 1447305_at   | -0.011812557 | 3.152769384 | -0.171987791 | 0.86709156  | 0.86709156  | -5.617587184 |
| 1428554_a_at | -0.010709371 | 9.625334886 | -0.171983416 | 0.867094904 | 0.867094904 | -5.61758791  |
| 1446721_at   | 0.011949268  | 3.438284796 | 0.171972441  | 0.867103293 | 0.867103293 | -5.617589729 |
| 1456434_x_at | -0.02227783  | 7.62346101  | -0.171970867 | 0.867104496 | 0.867104496 | -5.61758999  |
| 1434001_at   | -0.014229186 | 9.437833001 | -0.171902043 | 0.867157106 | 0.867157106 | -5.617601395 |
| 1417031_at   | -0.018389198 | 5.181591432 | -0.171800872 | 0.867234443 | 0.867234443 | -5.617618152 |
| 1449052_a_at | -0.010851872 | 7.672020096 | -0.17178468  | 0.867246821 | 0.867246821 | -5.617620833 |
| 1454300_at   | -0.019296376 | 4.076671287 | -0.171766677 | 0.867260583 | 0.867260583 | -5.617623813 |
| 1422582_at   | -0.013051188 | 3.84015089  | -0.171741403 | 0.867279903 | 0.867279903 | -5.617627997 |
| 1431404_at   | 0.016823413  | 4.015464056 | 0.171739863  | 0.86728108  | 0.86728108  | -5.617628252 |
| 1418286_a_at | -0.011410627 | 8.203900105 | -0.171723163 | 0.867293846 | 0.867293846 | -5.617631016 |
| 1415912_a_at | 0.011835     | 12.6694016  | 0.171708067  | 0.867305386 | 0.867305386 | -5.617633515 |
| 1444965_at   | 0.017757066  | 3.846977459 | 0.171636511  | 0.867360087 | 0.867360087 | -5.617645354 |
| 1447892_at   | -0.011182456 | 4.626771143 | -0.171586187 | 0.867398558 | 0.867398558 | -5.617653678 |
| 1434965_at   | -0.012342417 | 6.635548424 | -0.171561727 | 0.867417256 | 0.867417256 | -5.617657723 |
| 1442044_at   | -0.020551303 | 5.985400943 | -0.171542154 | 0.86743222  | 0.86743222  | -5.617660959 |
| 1449151_at   | 0.016412402  | 5.895316394 | 0.171490147  | 0.867471977 | 0.867471977 | -5.617669557 |
| 1439073_at   | 0.0171794    | 5.73392243  | 0.171483556  | 0.867477016 | 0.867477016 | -5.617670646 |
| 1450244_a_at | 0.012019037  | 6.594602473 | 0.17148252   | 0.867477807 | 0.867477807 | -5.617670817 |
| 1423913_at   | 0.013317695  | 7.655036287 | 0.171451987  | 0.867501149 | 0.867501149 | -5.617675863 |
| 1433440_x_at | 0.0153229    | 10.42183148 | 0.171437616  | 0.867512136 | 0.867512136 | -5.617678238 |
| 1433523_at   | -0.018639438 | 5.141330167 | -0.171334098 | 0.867591274 | 0.867591274 | -5.617695338 |
| 1449058_at   | 0.033291576  | 8.59599752  | 0.171332008  | 0.867592872 | 0.867592872 | -5.617695683 |
| 1430203_at   | 0.016620973  | 4.319214157 | 0.171292567  | 0.867623024 | 0.867623024 | -5.617702195 |
| 1424225_at   | -0.015607392 | 7.642242739 | -0.171284531 | 0.867629168 | 0.867629168 | -5.617703522 |
| 1460737_at   | 0.012662767  | 8.801047819 | 0.171275738  | 0.867635891 | 0.867635891 | -5.617704974 |
| 1425908_at   | 0.099612837  | 4.341306948 | 0.171222933  | 0.86767626  | 0.86767626  | -5.617713689 |
| 1427092_at   | 0.011857215  | 3.576405318 | 0.17110643   | 0.867765329 | 0.867765329 | -5.617732909 |
| 1442743_at   | -0.012395605 | 5.851862479 | -0.171049612 | 0.867808768 | 0.867808768 | -5.617742278 |
| 1454400_at   | -0.023886398 | 3.850453104 | -0.171044275 | 0.867812848 | 0.867812848 | -5.617743158 |
| 1428743_at   | 0.010196643  | 7.305044154 | 0.171041085  | 0.867815287 | 0.867815287 | -5.617743684 |

|              |              |             |              |             |             |              |
|--------------|--------------|-------------|--------------|-------------|-------------|--------------|
| 1458288_at   | 0.011696681  | 5.49288562  | 0.171036832  | 0.867818539 | 0.867818539 | -5.617744385 |
| 1435762_at   | -0.015433264 | 8.036331219 | -0.171029136 | 0.867824423 | 0.867824423 | -5.617745654 |
| 1418886_s_at | 0.010359025  | 10.55306694 | 0.170996746  | 0.867849187 | 0.867849187 | -5.617750993 |
| 1449432_a_at | 0.01332635   | 3.787941366 | 0.17099482   | 0.867850659 | 0.867850659 | -5.61775131  |
| 1432841_at   | -0.01580462  | 5.219121668 | -0.170982431 | 0.867860131 | 0.867860131 | -5.617753352 |
| 1428453_at   | 0.01345178   | 8.843120013 | 0.170980593  | 0.867861536 | 0.867861536 | -5.617753655 |
| 1421824_at   | 0.014845593  | 8.398204781 | 0.170969149  | 0.867870285 | 0.867870285 | -5.617755541 |
| 1438159_x_at | -0.010704433 | 10.50780388 | -0.170967945 | 0.867871206 | 0.867871206 | -5.617755739 |
| 1424251_a_at | 0.011130993  | 12.93543514 | 0.170912699  | 0.867913445 | 0.867913445 | -5.617764841 |
| 1458060_at   | 0.012702147  | 6.234205403 | 0.17085857   | 0.867954829 | 0.867954829 | -5.617773757 |
| 1432287_a_at | 0.016945492  | 4.030090195 | 0.170800983  | 0.867998859 | 0.867998859 | -5.617783239 |
| 1450842_a_at | 0.011769581  | 9.673304032 | 0.170785863  | 0.868010419 | 0.868010419 | -5.617785728 |
| 1455196_s_at | 0.015070519  | 7.241922136 | 0.170766762  | 0.868025023 | 0.868025023 | -5.617788872 |
| 1453718_at   | -0.011309975 | 5.545340687 | -0.170707655 | 0.868070215 | 0.868070215 | -5.617798599 |
| 1445292_at   | -0.0120604   | 3.744602425 | -0.170634736 | 0.868125969 | 0.868125969 | -5.617810594 |
| 1419113_at   | -0.010568128 | 7.053056219 | -0.170622917 | 0.868135005 | 0.868135005 | -5.617812538 |
| 1450756_s_at | -0.011512097 | 8.247870341 | -0.170613232 | 0.86814241  | 0.86814241  | -5.617814131 |
| 1450735_at   | 0.013415538  | 9.652067421 | 0.170546348  | 0.868193551 | 0.868193551 | -5.617825128 |
| 1417676_a_at | 0.021998174  | 6.102196749 | 0.170540791  | 0.868197799 | 0.868197799 | -5.617826041 |
| 1419981_at   | 0.017994507  | 4.532749899 | 0.170526641  | 0.868208618 | 0.868208618 | -5.617828367 |
| 1457525_at   | 0.016335234  | 3.864379933 | 0.170514198  | 0.868218132 | 0.868218132 | -5.617830412 |
| 1457928_at   | 0.011157088  | 3.529730361 | 0.170511529  | 0.868220173 | 0.868220173 | -5.617830851 |
| 1460529_at   | -0.014716567 | 3.638472619 | -0.170510496 | 0.868220963 | 0.868220963 | -5.61783102  |
| 1420476_a_at | 0.011296707  | 10.84984689 | 0.170509728  | 0.86822155  | 0.86822155  | -5.617831147 |
| 1458666_at   | -0.013449139 | 4.20762844  | -0.170492194 | 0.868234957 | 0.868234957 | -5.617834028 |
| 1438126_at   | 0.02889499   | 6.702803614 | 0.170384685  | 0.868317161 | 0.868317161 | -5.61785169  |
| 1454957_at   | 0.012485849  | 8.898303146 | 0.170332111  | 0.868357361 | 0.868357361 | -5.617860322 |
| 1423128_at   | 0.011868043  | 8.894162062 | 0.170328372  | 0.86836022  | 0.86836022  | -5.617860936 |
| 1449496_at   | -0.015413604 | 5.019432934 | -0.170290163 | 0.868389436 | 0.868389436 | -5.617867209 |
| 1439923_at   | 0.01564021   | 4.152418747 | 0.170274034  | 0.86840177  | 0.86840177  | -5.617869856 |
| 1458338_x_at | 0.014559293  | 4.559227653 | 0.170259894  | 0.868412581 | 0.868412581 | -5.617872176 |
| 1427023_at   | 0.017453921  | 5.275424605 | 0.170251821  | 0.868418754 | 0.868418754 | -5.617873501 |
| 1424414_at   | 0.012061118  | 6.917117649 | 0.170180177  | 0.868473538 | 0.868473538 | -5.617885256 |
| 1449902_at   | -0.013422557 | 3.477626102 | -0.170126186 | 0.868514822 | 0.868514822 | -5.617894111 |
| 1430776_s_at | 0.020616168  | 8.217440936 | 0.170093206  | 0.868540042 | 0.868540042 | -5.617899518 |
| 1440655_at   | 0.010148428  | 3.354596522 | 0.170091688  | 0.868541202 | 0.868541202 | -5.617899767 |
| 1424453_at   | -0.014668298 | 7.399851175 | -0.17004814  | 0.868574502 | 0.868574502 | -5.617906906 |
| 1423081_a_at | 0.013167358  | 8.382679076 | 0.17002097   | 0.868595279 | 0.868595279 | -5.617911359 |
| 1434448_at   | -0.015585027 | 8.651723926 | -0.169958889 | 0.868642751 | 0.868642751 | -5.617921531 |
| 1449549_at   | -0.013732701 | 5.809056925 | -0.169951307 | 0.86864855  | 0.86864855  | -5.617922773 |
| 1459353_at   | 0.010151853  | 6.798891157 | 0.169848569  | 0.868727114 | 0.868727114 | -5.617939598 |
| 1418823_at   | -0.015901431 | 8.878395792 | -0.169829504 | 0.868741693 | 0.868741693 | -5.617942719 |
| 1430856_at   | 0.018117943  | 4.827690271 | 0.169798177  | 0.868765649 | 0.868765649 | -5.617947846 |
| 1419352_at   | -0.015393604 | 9.352213514 | -0.169790016 | 0.868771889 | 0.868771889 | -5.617949182 |
| 1423971_at   | 0.017689757  | 8.243833691 | 0.169767077  | 0.868789432 | 0.868789432 | -5.617952936 |
| 1460277_at   | -0.017388633 | 4.989518287 | -0.169760292 | 0.868794621 | 0.868794621 | -5.617954046 |
| 1425289_a_at | -0.011176473 | 4.509814834 | -0.169749365 | 0.868802976 | 0.868802976 | -5.617955834 |
| 1439482_at   | -0.012411578 | 8.790085501 | -0.169728253 | 0.868819121 | 0.868819121 | -5.617959288 |
| 1419032_at   | 0.01772595   | 7.550749201 | 0.169664349  | 0.868867991 | 0.868867991 | -5.617969741 |
| 1451680_at   | -0.015206505 | 5.772521847 | -0.169635731 | 0.868889876 | 0.868889876 | -5.617974421 |
| 1429328_at   | -0.011191642 | 11.27028615 | -0.169634564 | 0.868890768 | 0.868890768 | -5.617974612 |
| 1415875_at   | 0.010877294  | 3.96414685  | 0.169585655  | 0.868928171 | 0.868928171 | -5.617982607 |
| 1425956_a_at | 0.016850161  | 7.175683068 | 0.16955209   | 0.86895384  | 0.86895384  | -5.617988094 |

|              |              |             |              |             |             |              |
|--------------|--------------|-------------|--------------|-------------|-------------|--------------|
| 1431210_at   | -0.010547743 | 3.31903791  | -0.169550255 | 0.868955244 | 0.868955244 | -5.617988394 |
| 1459895_at   | -0.014326783 | 6.476183733 | -0.169484079 | 0.869005852 | 0.869005852 | -5.617999207 |
| 1457140_s_at | 0.014605979  | 3.721014388 | 0.169481463  | 0.869007852 | 0.869007852 | -5.617999634 |
| 1427786_at   | -0.015918777 | 4.613694745 | -0.169454933 | 0.869028142 | 0.869028142 | -5.618003968 |
| 1458525_at   | 0.016436696  | 7.873443942 | 0.169434243  | 0.869043965 | 0.869043965 | -5.618007347 |
| 1446123_at   | -0.013653025 | 6.609172683 | -0.169378716 | 0.869086431 | 0.869086431 | -5.618016414 |
| 1447622_at   | -0.013785134 | 3.61686444  | -0.169373644 | 0.869090309 | 0.869090309 | -5.618017242 |
| 1416633_a_at | -0.018693179 | 10.45348275 | -0.169328154 | 0.869125099 | 0.869125099 | -5.618024668 |
| 1434899_s_at | 0.011162379  | 9.655375873 | 0.169252643  | 0.869182849 | 0.869182849 | -5.61803699  |
| 1428478_at   | 0.012938669  | 8.24047     | 0.169223772  | 0.869204929 | 0.869204929 | -5.618041699 |
| 1441669_at   | 0.013216579  | 6.393378512 | 0.169205252  | 0.869219093 | 0.869219093 | -5.61804472  |
| 1456267_at   | -0.033904419 | 5.811221639 | -0.169170173 | 0.869245922 | 0.869245922 | -5.618050441 |
| 1427003_at   | -0.012990826 | 8.19009497  | -0.169140763 | 0.869268415 | 0.869268415 | -5.618055236 |
| 1430387_at   | -0.015215455 | 3.673190233 | -0.169052061 | 0.869336256 | 0.869336256 | -5.618069694 |
| 1452450_at   | 0.018220943  | 7.599281534 | 0.169038706  | 0.86934647  | 0.86934647  | -5.61807187  |
| 1426406_at   | -0.016611008 | 10.00719869 | -0.169027588 | 0.869354973 | 0.869354973 | -5.618073682 |
| 1455773_at   | 0.021711211  | 8.438923729 | 0.169019649  | 0.869361045 | 0.869361045 | -5.618074975 |
| 1444664_at   | 0.014690352  | 3.339295148 | 0.169010604  | 0.869367963 | 0.869367963 | -5.618076449 |
| 1428158_at   | 0.016702361  | 9.551853295 | 0.169001904  | 0.869374617 | 0.869374617 | -5.618077866 |
| 1418068_at   | 0.016535259  | 6.001497939 | 0.168992749  | 0.869381619 | 0.869381619 | -5.618079358 |
| 1433182_at   | -0.015044708 | 3.916370072 | -0.1689893   | 0.869384258 | 0.869384258 | -5.61807992  |
| 1434564_at   | 0.012304964  | 8.515668095 | 0.168985165  | 0.86938742  | 0.86938742  | -5.618080593 |
| 1420388_at   | 0.01126022   | 9.807707921 | 0.168971987  | 0.869397499 | 0.869397499 | -5.61808274  |
| 1430701_a_at | 0.01420951   | 6.411698819 | 0.168797886  | 0.86953066  | 0.86953066  | -5.618111082 |
| 1452751_at   | 0.032542709  | 8.018390775 | 0.168776734  | 0.869546838 | 0.869546838 | -5.618114523 |
| 1439082_at   | 0.014893827  | 7.612642194 | 0.16876732   | 0.869554038 | 0.869554038 | -5.618116055 |
| 1427720_a_at | -0.012609092 | 10.2490958  | -0.168697119 | 0.869607733 | 0.869607733 | -5.618127473 |
| 1437794_at   | -0.019643924 | 6.111618624 | -0.168664706 | 0.869632525 | 0.869632525 | -5.618132743 |
| 1418311_at   | -0.01243038  | 3.818923748 | -0.168616726 | 0.869669224 | 0.869669224 | -5.618140543 |
| 1420866_at   | -0.015344421 | 7.165633444 | -0.168599758 | 0.869682203 | 0.869682203 | -5.6181433   |
| 1444801_at   | 0.011249111  | 3.693989825 | 0.168599368  | 0.869682501 | 0.869682501 | -5.618143364 |
| 1439149_s_at | 0.014652307  | 3.978190216 | 0.168571138  | 0.869704093 | 0.869704093 | -5.618147951 |
| 1426735_at   | -0.013811885 | 7.310592027 | -0.168559391 | 0.869713078 | 0.869713078 | -5.61814986  |
| 1427465_at   | 0.01314856   | 4.152141847 | 0.168465142  | 0.86978517  | 0.86978517  | -5.61816517  |
| 1443466_s_at | -0.013797321 | 7.42639208  | -0.168458584 | 0.869790186 | 0.869790186 | -5.618166234 |
| 1420050_at   | -0.011890087 | 3.546211822 | -0.168456281 | 0.869791948 | 0.869791948 | -5.618166608 |
| 1440891_at   | -0.018761423 | 3.769549923 | -0.16838384  | 0.869847359 | 0.869847359 | -5.618178369 |
| 1460448_s_at | 0.022048129  | 7.45766549  | 0.168368173  | 0.869859343 | 0.869859343 | -5.618180912 |
| 1445102_at   | -0.010598935 | 4.273770022 | -0.168347181 | 0.8698754   | 0.8698754   | -5.618184319 |
| 1459934_at   | 0.016595465  | 3.726647817 | 0.168332486  | 0.869886641 | 0.869886641 | -5.618186703 |
| 1451580_a_at | -0.013908695 | 6.055177654 | -0.168312342 | 0.869902049 | 0.869902049 | -5.618189972 |
| 1439226_at   | -0.011480367 | 5.06925693  | -0.168304664 | 0.869907922 | 0.869907922 | -5.618191217 |
| 1422315_x_at | -0.015206168 | 3.308702947 | -0.168300533 | 0.869911082 | 0.869911082 | -5.618191887 |
| 1441322_at   | -0.013022617 | 4.144860385 | -0.168253165 | 0.869947315 | 0.869947315 | -5.618199571 |
| 1452480_at   | -0.021197633 | 3.71468087  | -0.168188375 | 0.869996876 | 0.869996876 | -5.618210077 |
| 1453169_a_at | -0.01102043  | 8.61765633  | -0.168185119 | 0.869999367 | 0.869999367 | -5.618210605 |
| 1450143_at   | -0.013961629 | 3.410846611 | -0.168181665 | 0.870002009 | 0.870002009 | -5.618211165 |
| 1452078_a_at | -0.012018834 | 6.889460313 | -0.168170068 | 0.87001088  | 0.87001088  | -5.618213045 |
| 1455990_at   | 0.010381013  | 9.115264519 | 0.168146796  | 0.870028682 | 0.870028682 | -5.618216817 |
| 1430819_at   | -0.018433834 | 4.327175432 | -0.168045393 | 0.870106251 | 0.870106251 | -5.618233248 |
| 1438704_at   | 0.029390111  | 5.297635913 | 0.168041009  | 0.870109605 | 0.870109605 | -5.618233959 |
| 1442518_at   | -0.012896275 | 4.398127805 | -0.168030278 | 0.870117814 | 0.870117814 | -5.618235697 |
| 1460079_at   | 0.016706316  | 3.729721889 | 0.167988333  | 0.8701499   | 0.8701499   | -5.61824249  |



|              |              |             |              |             |             |              |
|--------------|--------------|-------------|--------------|-------------|-------------|--------------|
| 1441495_at   | 0.01483806   | 4.975886127 | 0.167899547  | 0.87021782  | 0.87021782  | -5.618256864 |
| 1457103_at   | -0.012232825 | 4.597301167 | -0.167884795 | 0.870229105 | 0.870229105 | -5.618259251 |
| 1423030_at   | 0.012208305  | 12.22470975 | 0.167874381  | 0.870237072 | 0.870237072 | -5.618260937 |
| 1451943_a_at | -0.012591042 | 8.734623364 | -0.167869007 | 0.870241183 | 0.870241183 | -5.618261806 |
| 1459332_at   | 0.019913328  | 7.464075261 | 0.167842939  | 0.870261125 | 0.870261125 | -5.618266024 |
| 1445657_at   | -0.011752773 | 3.765751697 | -0.167828435 | 0.87027222  | 0.87027222  | -5.618268371 |
| 1430526_a_at | 0.015245291  | 9.309429291 | 0.167764162  | 0.870321389 | 0.870321389 | -5.618278767 |
| 1434492_at   | -0.022045865 | 5.977494969 | -0.167698328 | 0.870371753 | 0.870371753 | -5.618289412 |
| 1428431_at   | -0.013404544 | 9.349110724 | -0.167696502 | 0.870373149 | 0.870373149 | -5.618289707 |
| 1441025_at   | -0.017210962 | 4.223134445 | -0.167651951 | 0.870407232 | 0.870407232 | -5.618296908 |
| 1453796_a_at | -0.016817064 | 9.356211167 | -0.167592489 | 0.870452722 | 0.870452722 | -5.618306516 |
| 1436781_at   | -0.014831518 | 6.402690501 | -0.167552294 | 0.870483473 | 0.870483473 | -5.618313009 |
| 1450959_at   | 0.015694019  | 7.918517333 | 0.167474719  | 0.87054282  | 0.87054282  | -5.618325535 |
| 1428343_at   | -0.014556284 | 8.565401307 | -0.167469578 | 0.870546754 | 0.870546754 | -5.618326365 |
| 1433846_s_at | 0.011977162  | 9.044472715 | 0.167453932  | 0.870558723 | 0.870558723 | -5.618328891 |
| 1428218_a_at | 0.015645263  | 8.392937271 | 0.167387658  | 0.870609427 | 0.870609427 | -5.618339587 |
| 1440689_at   | -0.015038369 | 6.56657486  | -0.167363577 | 0.87062785  | 0.87062785  | -5.618343473 |
| 1452579_at   | -0.012299304 | 9.390060609 | -0.167362633 | 0.870628572 | 0.870628572 | -5.618343625 |
| 1442143_at   | 0.015407326  | 3.824658564 | 0.16735694   | 0.870632928 | 0.870632928 | -5.618344543 |
| 1432565_at   | -0.021677664 | 4.178996123 | -0.167321115 | 0.870660337 | 0.870660337 | -5.618350322 |
| 1432034_at   | -0.011820992 | 4.290599787 | -0.167300754 | 0.870675914 | 0.870675914 | -5.618353606 |
| 1438604_at   | -0.013333205 | 6.178706269 | -0.167216546 | 0.87074034  | 0.87074034  | -5.618367184 |
| 1431714_at   | 0.014063299  | 3.92014841  | 0.167216163  | 0.870740633 | 0.870740633 | -5.618367245 |
| 1441567_at   | -0.024091516 | 7.687408468 | -0.167198593 | 0.870754075 | 0.870754075 | -5.618370077 |
| 1453879_at   | -0.016049241 | 3.533343995 | -0.167132535 | 0.870804616 | 0.870804616 | -5.618380722 |
| 1429866_at   | -0.012531963 | 4.843066588 | -0.167108421 | 0.870823066 | 0.870823066 | -5.618384607 |
| 1423031_at   | 0.012249342  | 9.035690794 | 0.167071561  | 0.870851267 | 0.870851267 | -5.618390544 |
| 1457808_at   | 0.023208649  | 3.811919541 | 0.167070708  | 0.87085192  | 0.87085192  | -5.618390682 |
| 1436016_x_at | 0.012177073  | 11.8688896  | 0.167030622  | 0.870882589 | 0.870882589 | -5.618397137 |
| 1422254_a_at | -0.015678246 | 7.035630293 | -0.167018683 | 0.870891724 | 0.870891724 | -5.618399059 |
| 1435621_at   | -0.019929762 | 3.555489285 | -0.167007553 | 0.87090024  | 0.87090024  | -5.618400851 |
| 1435143_at   | -0.012127336 | 8.096231309 | -0.166966135 | 0.870931929 | 0.870931929 | -5.618407519 |
| 1426365_at   | -0.013342004 | 9.567641127 | -0.166886493 | 0.870992865 | 0.870992865 | -5.618420334 |
| 1423901_at   | 0.011697754  | 9.087029826 | 0.166802514  | 0.871057121 | 0.871057121 | -5.618433842 |
| 1456789_at   | -0.014916912 | 9.328248594 | -0.166735692 | 0.87110825  | 0.87110825  | -5.618444584 |
| 1457423_at   | -0.026413866 | 5.941484548 | -0.166723647 | 0.871117466 | 0.871117466 | -5.61844652  |
| 1439049_at   | -0.024375307 | 5.295821405 | -0.166681155 | 0.871149979 | 0.871149979 | -5.618453349 |
| 1436887_x_at | 0.013695658  | 6.016197608 | 0.166673712  | 0.871155674 | 0.871155674 | -5.618454545 |
| 1452085_at   | 0.020716778  | 8.428242015 | 0.166671619  | 0.871157275 | 0.871157275 | -5.618454881 |
| 1460248_at   | -0.018515666 | 6.571975007 | -0.166640256 | 0.871181273 | 0.871181273 | -5.61845992  |
| 1432004_a_at | 0.022308908  | 6.569297211 | 0.166613917  | 0.871201427 | 0.871201427 | -5.618464151 |
| 1418900_at   | 0.010843083  | 5.625461647 | 0.166608747  | 0.871205383 | 0.871205383 | -5.618464981 |
| 1442655_at   | 0.018756992  | 4.682014108 | 0.166518822  | 0.871274192 | 0.871274192 | -5.61847942  |
| 1419823_s_at | -0.020148522 | 6.952183189 | -0.166508748 | 0.871281899 | 0.871281899 | -5.618481037 |
| 1449728_at   | 0.014865098  | 3.836596108 | 0.166476843  | 0.871306313 | 0.871306313 | -5.618486158 |
| 1433593_at   | 0.013449572  | 6.938493391 | 0.166464281  | 0.871315925 | 0.871315925 | -5.618488174 |
| 1424614_at   | -0.018072086 | 8.729085471 | -0.166411993 | 0.871355936 | 0.871355936 | -5.618496564 |
| 1430528_at   | -0.014439849 | 5.422121145 | -0.166396143 | 0.871368064 | 0.871368064 | -5.618499106 |
| 1418810_at   | 0.013406506  | 5.18441433  | 0.166374719  | 0.871384458 | 0.871384458 | -5.618502543 |
| 1416145_at   | 0.010715639  | 11.75105869 | 0.166356975  | 0.871398036 | 0.871398036 | -5.618505389 |
| 1449316_at   | -0.014705476 | 3.91222498  | -0.166309259 | 0.871434548 | 0.871434548 | -5.61851304  |
| 1450888_at   | 0.011528127  | 6.850439756 | 0.16624622   | 0.871482787 | 0.871482787 | -5.618523145 |
| 1427122_at   | 0.0129565    | 3.030465464 | 0.166235792  | 0.871490766 | 0.871490766 | -5.618524816 |

|              |              |             |              |             |             |              |
|--------------|--------------|-------------|--------------|-------------|-------------|--------------|
| 1426976_at   | 0.011038469  | 10.87291825 | 0.16622089   | 0.871502169 | 0.871502169 | -5.618527204 |
| 1449808_at   | 0.014314424  | 3.137414307 | 0.166219407  | 0.871503305 | 0.871503305 | -5.618527442 |
| 1416258_at   | -0.010987957 | 8.886836358 | -0.166135916 | 0.871567194 | 0.871567194 | -5.618540817 |
| 1458810_at   | 0.022553711  | 4.174328694 | 0.166121799  | 0.871577997 | 0.871577997 | -5.618543078 |
| 1432865_at   | 0.012824699  | 3.36600554  | 0.166115666  | 0.871582691 | 0.871582691 | -5.61854406  |
| 1434696_at   | 0.011713624  | 8.479076545 | 0.166082665  | 0.871607944 | 0.871607944 | -5.618549344 |
| 1438028_at   | -0.011064124 | 8.032886885 | -0.166033461 | 0.871645598 | 0.871645598 | -5.618557221 |
| 1442080_at   | -0.022602878 | 7.207080209 | -0.166003086 | 0.871668842 | 0.871668842 | -5.618562083 |
| 1457066_at   | -0.011305529 | 4.070968859 | -0.165993857 | 0.871675905 | 0.871675905 | -5.61856356  |
| 1433985_at   | -0.013816859 | 9.019652995 | -0.165987456 | 0.871680803 | 0.871680803 | -5.618564584 |
| 1431491_at   | 0.014339376  | 3.27155075  | 0.165986994  | 0.871681156 | 0.871681156 | -5.618564658 |
| 1434438_at   | 0.010819008  | 8.350605587 | 0.16597938   | 0.871686983 | 0.871686983 | -5.618565876 |
| 1424656_s_at | -0.019366748 | 8.264663125 | -0.165975449 | 0.871689991 | 0.871689991 | -5.618566505 |
| 1438827_at   | 0.013431407  | 5.504896825 | 0.165949515  | 0.871709838 | 0.871709838 | -5.618570654 |
| 1426347_at   | 0.011901515  | 8.974154354 | 0.165933772  | 0.871721885 | 0.871721885 | -5.618573173 |
| 1418079_at   | 0.014427684  | 8.054096594 | 0.165896467  | 0.871750433 | 0.871750433 | -5.61857914  |
| 1453523_at   | -0.015398592 | 4.688111905 | -0.165889318 | 0.871755904 | 0.871755904 | -5.618580283 |
| 1426346_at   | 0.013951958  | 7.770711717 | 0.165887754  | 0.871757101 | 0.871757101 | -5.618580533 |
| 1428368_at   | -0.012988563 | 9.411459666 | -0.165849106 | 0.871786677 | 0.871786677 | -5.618586713 |
| 1450958_at   | -0.024710475 | 8.803784964 | -0.165770156 | 0.871847096 | 0.871847096 | -5.618599333 |
| 1431087_at   | -0.009950213 | 8.494219649 | -0.165764745 | 0.871851238 | 0.871851238 | -5.618600198 |
| 1425570_at   | -0.010898392 | 4.334238255 | -0.165737302 | 0.871872239 | 0.871872239 | -5.618604583 |
| 1429467_s_at | 0.011399041  | 3.237408322 | 0.165733777  | 0.871874937 | 0.871874937 | -5.618605146 |
| 1449012_s_at | -0.01355311  | 8.625124582 | -0.165709879 | 0.871893225 | 0.871893225 | -5.618608964 |
| 1424112_at   | -0.013234427 | 11.13568122 | -0.165694947 | 0.871904653 | 0.871904653 | -5.61861135  |
| 1424228_at   | -0.01117125  | 5.827650224 | -0.165667913 | 0.871925342 | 0.871925342 | -5.618615668 |
| 1423701_at   | 0.01147683   | 7.950640894 | 0.165641809  | 0.87194532  | 0.87194532  | -5.618619836 |
| 1434920_a_at | 0.02582391   | 9.987457819 | 0.165619396  | 0.871962472 | 0.871962472 | -5.618623415 |
| 1433254_at   | -0.011307852 | 3.356943147 | -0.165594012 | 0.871981899 | 0.871981899 | -5.618627468 |
| 1441809_at   | -0.014011204 | 3.313930917 | -0.165592775 | 0.871982846 | 0.871982846 | -5.618627665 |
| 1417105_at   | 0.010885106  | 9.71043147  | 0.165579763  | 0.871992804 | 0.871992804 | -5.618629743 |
| 1417668_at   | 0.029591894  | 5.208036065 | 0.165579185  | 0.871993247 | 0.871993247 | -5.618629835 |
| 1454776_at   | 0.013483204  | 10.26709657 | 0.165576086  | 0.871995618 | 0.871995618 | -5.618630329 |
| 1432942_at   | 0.012306465  | 3.911523494 | 0.165530427  | 0.872030561 | 0.872030561 | -5.618637617 |
| 1439358_a_at | 0.014204834  | 3.852822673 | 0.16551725   | 0.872040646 | 0.872040646 | -5.618639719 |
| 1452756_at   | -0.012638445 | 7.907510446 | -0.165447878 | 0.872093739 | 0.872093739 | -5.618650787 |
| 1456148_a_at | 0.012837279  | 4.59456606  | 0.165438714  | 0.872100752 | 0.872100752 | -5.618652248 |
| 1451574_at   | -0.016623103 | 8.470577202 | -0.165420175 | 0.872114941 | 0.872114941 | -5.618655205 |
| 1431390_a_at | 0.014696791  | 11.24790968 | 0.165400782  | 0.872129783 | 0.872129783 | -5.618658298 |
| 1418597_at   | -0.014035795 | 6.731285673 | -0.16539208  | 0.872136443 | 0.872136443 | -5.618659685 |
| 1454626_at   | -0.011228405 | 11.59245048 | -0.165370881 | 0.872152667 | 0.872152667 | -5.618663065 |
| 1445539_at   | -0.014100017 | 9.001224591 | -0.165365985 | 0.872156415 | 0.872156415 | -5.618663846 |
| 1436229_at   | 0.01505503   | 6.857043324 | 0.165324607  | 0.872188083 | 0.872188083 | -5.618670441 |
| 1416329_at   | 0.010012604  | 10.84732189 | 0.165314774  | 0.872195608 | 0.872195608 | -5.618672008 |
| 1449416_at   | 0.010556879  | 3.924239049 | 0.165269811  | 0.872230021 | 0.872230021 | -5.618679173 |
| 1436484_at   | -0.019485858 | 3.609510819 | -0.165253954 | 0.872242157 | 0.872242157 | -5.6186817   |
| 1428108_x_at | 0.013165753  | 7.512248728 | 0.165239419  | 0.872253282 | 0.872253282 | -5.618684015 |
| 1447862_x_at | 0.019564603  | 9.134333178 | 0.165184937  | 0.87229498  | 0.87229498  | -5.618692693 |
| 1448274_at   | 0.01561835   | 10.66226704 | 0.165166252  | 0.872309281 | 0.872309281 | -5.618695668 |
| 1416753_at   | 0.012974159  | 8.263835465 | 0.165110766  | 0.872351749 | 0.872351749 | -5.618704502 |
| 1419872_at   | 0.019463192  | 9.779846269 | 0.165079435  | 0.872375729 | 0.872375729 | -5.618709489 |
| 1457752_at   | -0.012620101 | 4.785355674 | -0.164986873 | 0.872446576 | 0.872446576 | -5.618724216 |
| 1424580_at   | 0.016479057  | 5.630108868 | 0.164953881  | 0.872471827 | 0.872471827 | -5.618729463 |

|              |              |             |              |             |             |              |
|--------------|--------------|-------------|--------------|-------------|-------------|--------------|
| 1447916_at   | 0.015353187  | 3.430861434 | 0.164941944  | 0.872480964 | 0.872480964 | -5.618731361 |
| 1456173_at   | -0.018027347 | 3.788711486 | -0.16493383  | 0.872487174 | 0.872487174 | -5.618732652 |
| 1449687_at   | 0.013854732  | 9.756516663 | 0.164920481  | 0.872497392 | 0.872497392 | -5.618734774 |
| 1423139_at   | 0.01959426   | 5.408020953 | 0.164912987  | 0.872503128 | 0.872503128 | -5.618735966 |
| 1429995_at   | -0.012359388 | 4.576563227 | -0.164879405 | 0.872528832 | 0.872528832 | -5.618741304 |
| 1432263_a_at | 0.01013359   | 10.15298788 | 0.164867644  | 0.872537834 | 0.872537834 | -5.618743174 |
| 1459953_at   | -0.013370621 | 3.605702975 | -0.164846015 | 0.872554389 | 0.872554389 | -5.618746611 |
| 1435817_x_at | 0.012655828  | 10.46881534 | 0.16480582   | 0.872585155 | 0.872585155 | -5.618752998 |
| 1448275_at   | 0.012291152  | 7.089919249 | 0.164791452  | 0.872596152 | 0.872596152 | -5.618755281 |
| 1441819_x_at | -0.019295687 | 4.387632014 | -0.164736722 | 0.872638044 | 0.872638044 | -5.618763975 |
| 1441863_x_at | -0.026424385 | 3.681689333 | -0.164712562 | 0.872656537 | 0.872656537 | -5.618767812 |
| 1415787_at   | -0.012110927 | 9.707292392 | -0.164614333 | 0.872731726 | 0.872731726 | -5.618783406 |
| 1421392_a_at | -0.011874902 | 7.860221767 | -0.164595408 | 0.872746212 | 0.872746212 | -5.618786409 |
| 1432473_a_at | -0.015766844 | 3.498680079 | -0.164517164 | 0.872806104 | 0.872806104 | -5.618798822 |
| 1458866_at   | -0.012406322 | 3.742163253 | -0.164486823 | 0.872829329 | 0.872829329 | -5.618803634 |
| 1430018_at   | 0.012536513  | 5.626774487 | 0.164482692  | 0.872832491 | 0.872832491 | -5.618804289 |
| 1440573_at   | 0.012633286  | 8.953111444 | 0.16444466   | 0.872861603 | 0.872861603 | -5.618810319 |
| 1452818_at   | 0.011742518  | 6.086864898 | 0.164402328  | 0.872894007 | 0.872894007 | -5.61881703  |
| 1458384_at   | -0.010477049 | 4.600250833 | -0.16440067  | 0.872895276 | 0.872895276 | -5.618817293 |
| 1416161_at   | 0.02495028   | 10.78621838 | 0.164347579  | 0.872935917 | 0.872935917 | -5.618825706 |
| 1429305_at   | -0.015737525 | 7.467499557 | -0.164347398 | 0.872936056 | 0.872936056 | -5.618825735 |
| 1427911_at   | 0.012051395  | 7.314943703 | 0.164328896  | 0.872950218 | 0.872950218 | -5.618828666 |
| 1442468_at   | -0.013439146 | 4.562738157 | -0.164284665 | 0.872984077 | 0.872984077 | -5.618835673 |
| 1443632_at   | -0.02323583  | 4.171977932 | -0.164280618 | 0.872987175 | 0.872987175 | -5.618836314 |
| 1440648_at   | 0.013908297  | 4.308819792 | 0.164236747  | 0.873020758 | 0.873020758 | -5.618843261 |
| 1427143_at   | -0.01105743  | 10.55369536 | -0.164192993 | 0.873054252 | 0.873054252 | -5.618850189 |
| 1416852_a_at | 0.01265535   | 8.001705715 | 0.164181963  | 0.873062695 | 0.873062695 | -5.618851934 |
| 1417733_at   | 0.009758608  | 9.904137126 | 0.164164011  | 0.873076438 | 0.873076438 | -5.618854776 |
| 1434317_s_at | 0.020425037  | 8.332003939 | 0.164155134  | 0.873083233 | 0.873083233 | -5.618856181 |
| 1425484_at   | 0.019245847  | 7.231275535 | 0.164143559  | 0.873092094 | 0.873092094 | -5.618858013 |
| 1458057_at   | 0.01874353   | 7.362086368 | 0.16410241   | 0.873123594 | 0.873123594 | -5.618864524 |
| 1457437_at   | 0.013227065  | 4.536280717 | 0.164028182  | 0.873180417 | 0.873180417 | -5.618876265 |
| 1441141_at   | -0.018791933 | 6.66482515  | -0.164014033 | 0.873191249 | 0.873191249 | -5.618878502 |
| 1440486_at   | -0.018153555 | 5.604632193 | -0.164009576 | 0.873194661 | 0.873194661 | -5.618879207 |
| 1441267_at   | -0.012708799 | 5.016492714 | -0.164009492 | 0.873194725 | 0.873194725 | -5.618879221 |
| 1453501_at   | -0.014683278 | 3.513562346 | -0.163905956 | 0.873273986 | 0.873273986 | -5.618895587 |
| 1444117_at   | 0.014260104  | 4.559307429 | 0.163878192  | 0.873295241 | 0.873295241 | -5.618899974 |
| 1424521_at   | -0.018122044 | 6.810230136 | -0.163877322 | 0.873295907 | 0.873295907 | -5.618900111 |
| 1453524_at   | 0.01522658   | 7.124524395 | 0.163877203  | 0.873295998 | 0.873295998 | -5.61890013  |
| 1415856_at   | 0.021401344  | 7.778448172 | 0.163809934  | 0.873347496 | 0.873347496 | -5.618910756 |
| 1422049_at   | 0.011930857  | 4.42528711  | 0.163781812  | 0.873369025 | 0.873369025 | -5.618915197 |
| 1439403_x_at | -0.020737735 | 6.525633381 | -0.163752749 | 0.873391275 | 0.873391275 | -5.618919786 |
| 1441883_at   | 0.01258815   | 4.722780012 | 0.163712949  | 0.873421745 | 0.873421745 | -5.618926069 |
| 1443692_at   | 0.021076762  | 4.888321524 | 0.163701569  | 0.873430457 | 0.873430457 | -5.618927865 |
| 1451780_at   | 0.014743813  | 6.175401172 | 0.163701399  | 0.873430587 | 0.873430587 | -5.618927892 |
| 1447566_at   | 0.014156248  | 6.072893041 | 0.163698257  | 0.873432992 | 0.873432992 | -5.618928388 |
| 1416718_at   | -0.010180551 | 4.092618422 | -0.163668673 | 0.873455641 | 0.873455641 | -5.618933056 |
| 1458731_at   | -0.015578994 | 4.026761723 | -0.1635819   | 0.873522073 | 0.873522073 | -5.618946745 |
| 1444871_at   | -0.010414998 | 3.234520297 | -0.163575848 | 0.873526707 | 0.873526707 | -5.6189477   |
| 1439880_at   | -0.021172561 | 4.081191903 | -0.163570501 | 0.873530801 | 0.873530801 | -5.618948543 |
| 1454665_at   | 0.014255491  | 5.871573178 | 0.163554356  | 0.873543161 | 0.873543161 | -5.618951089 |
| 1430948_at   | 0.017096317  | 3.51828651  | 0.163548594  | 0.873547572 | 0.873547572 | -5.618951998 |
| 1422256_at   | -0.013708343 | 5.801162607 | -0.163542503 | 0.873552235 | 0.873552235 | -5.618952958 |

|              |              |             |              |             |             |              |
|--------------|--------------|-------------|--------------|-------------|-------------|--------------|
| 1418955_at   | 0.014522375  | 6.85005893  | 0.163504447  | 0.873581371 | 0.873581371 | -5.618958958 |
| 1430734_at   | -0.014491241 | 5.254816436 | -0.163501093 | 0.873583939 | 0.873583939 | -5.618959487 |
| 1457269_at   | 0.017737482  | 5.186521347 | 0.163496161  | 0.873587715 | 0.873587715 | -5.618960264 |
| 1435096_at   | 0.011288432  | 8.809290155 | 0.163457514  | 0.873617303 | 0.873617303 | -5.618966355 |
| 1457981_x_at | 0.015765649  | 3.886449435 | 0.163446982  | 0.873625367 | 0.873625367 | -5.618968015 |
| 1443775_x_at | 0.018615564  | 3.778889608 | 0.163446374  | 0.873625832 | 0.873625832 | -5.618968111 |
| 1460007_at   | 0.013501633  | 5.995736716 | 0.163446068  | 0.873626067 | 0.873626067 | -5.618968159 |
| 1439806_at   | 0.016789716  | 5.258825687 | 0.163444391  | 0.873627351 | 0.873627351 | -5.618968424 |
| 1460324_at   | -0.013585666 | 9.722304722 | -0.163418493 | 0.873647179 | 0.873647179 | -5.618972504 |
| 1430731_at   | -0.01126627  | 4.19609025  | -0.163359329 | 0.873692475 | 0.873692475 | -5.618981824 |
| 1433033_at   | -0.014190022 | 5.411392786 | -0.163345646 | 0.873702951 | 0.873702951 | -5.618983979 |
| 1436466_at   | 0.01555132   | 5.778190175 | 0.163305769  | 0.873733482 | 0.873733482 | -5.618990259 |
| 1424013_at   | -0.010007138 | 10.37134412 | -0.163273417 | 0.873758252 | 0.873758252 | -5.618995352 |
| 1428891_at   | 0.023427272  | 8.823545313 | 0.163269581  | 0.873761189 | 0.873761189 | -5.618995956 |
| 1419882_at   | 0.010372767  | 3.691667135 | 0.163255722  | 0.8737718   | 0.8737718   | -5.618998137 |
| 1426111_x_at | -0.020232549 | 9.248255092 | -0.163243181 | 0.873781401 | 0.873781401 | -5.619000111 |
| 1451914_a_at | 0.011581892  | 4.596653619 | 0.163215505  | 0.873802591 | 0.873802591 | -5.619004467 |
| 1420590_at   | -0.011586772 | 6.10436899  | -0.163209098 | 0.873807497 | 0.873807497 | -5.619005475 |
| 1445875_at   | -0.015237592 | 3.460963591 | -0.16315622  | 0.873847983 | 0.873847983 | -5.619013794 |
| 1425317_x_at | 0.015698185  | 3.471211352 | 0.163133495  | 0.873865382 | 0.873865382 | -5.619017369 |
| 1434775_at   | -0.015761561 | 9.328782355 | -0.16306841  | 0.873915215 | 0.873915215 | -5.619027604 |
| 1450815_s_at | -0.013341945 | 11.58109875 | -0.163050395 | 0.873929009 | 0.873929009 | -5.619030436 |
| 1419361_at   | -0.011916167 | 9.171799096 | -0.163010011 | 0.873959929 | 0.873959929 | -5.619036784 |
| 1423616_at   | -0.016866387 | 8.067832488 | -0.162988807 | 0.873976165 | 0.873976165 | -5.619040116 |
| 1451763_at   | 0.010849744  | 4.016839684 | 0.16298262   | 0.873980901 | 0.873980901 | -5.619041088 |
| 1417998_at   | 0.012297549  | 11.59240393 | 0.162963982  | 0.873995172 | 0.873995172 | -5.619044017 |
| 1416148_at   | -0.015966185 | 9.642255418 | -0.162937834 | 0.874015193 | 0.874015193 | -5.619048125 |
| 1443929_at   | 0.020722907  | 4.263656039 | 0.162929379  | 0.874021667 | 0.874021667 | -5.619049453 |
| 1422485_at   | 0.012997444  | 10.68432861 | 0.162901061  | 0.87404335  | 0.87404335  | -5.619053901 |
| 1450530_at   | -0.015940667 | 4.412884763 | -0.162878405 | 0.874060697 | 0.874060697 | -5.619057459 |
| 1435793_at   | -0.018578893 | 6.845617723 | -0.162870851 | 0.874066481 | 0.874066481 | -5.619058646 |
| 1427684_at   | -0.03058086  | 4.118926732 | -0.162848274 | 0.874083768 | 0.874083768 | -5.619062191 |
| 1448158_at   | 0.016496125  | 8.688886668 | 0.16281773   | 0.874107155 | 0.874107155 | -5.619066986 |
| 1455764_at   | 0.023183002  | 5.453913482 | 0.162799964  | 0.874120759 | 0.874120759 | -5.619069775 |
| 1458860_at   | 0.018078081  | 4.480935789 | 0.162774017  | 0.874140627 | 0.874140627 | -5.619073847 |
| 1421965_s_at | 0.015909779  | 9.243430437 | 0.162754773  | 0.874155362 | 0.874155362 | -5.619076867 |
| 1446385_at   | -0.012947284 | 6.878497953 | -0.162743861 | 0.874163717 | 0.874163717 | -5.61907858  |
| 1434862_at   | 0.013043394  | 3.954395348 | 0.16272524   | 0.874177975 | 0.874177975 | -5.619081501 |
| 1435402_at   | -0.014828107 | 5.707030976 | -0.162650351 | 0.874235319 | 0.874235319 | -5.619093248 |
| 1423464_at   | -0.012494654 | 7.267119614 | -0.162586487 | 0.874284221 | 0.874284221 | -5.619103261 |
| 1453785_at   | 0.012357756  | 3.930484359 | 0.162570601  | 0.874296386 | 0.874296386 | -5.619105752 |
| 1419430_at   | 0.019298515  | 7.549204102 | 0.162570291  | 0.874296623 | 0.874296623 | -5.6191058   |
| 1425482_s_at | 0.011663583  | 9.23546165  | 0.162564448  | 0.874301097 | 0.874301097 | -5.619106716 |
| 1453900_at   | -0.017388102 | 5.179552338 | -0.162554823 | 0.874308467 | 0.874308467 | -5.619108225 |
| 1458334_at   | -0.017699609 | 3.713734864 | -0.16251452  | 0.874339329 | 0.874339329 | -5.619114541 |
| 1424856_at   | 0.014518759  | 4.888223399 | 0.162510198  | 0.874342638 | 0.874342638 | -5.619115218 |
| 1453335_a_at | 0.015430782  | 5.169335222 | 0.1624986    | 0.87435152  | 0.87435152  | -5.619117035 |
| 1420035_at   | -0.012621592 | 4.955183323 | -0.162491455 | 0.87435699  | 0.87435699  | -5.619118154 |
| 1444416_at   | 0.065104475  | 5.737833528 | 0.162475243  | 0.874369404 | 0.874369404 | -5.619120694 |
| 1431525_at   | 0.019774545  | 5.05547612  | 0.162471223  | 0.874372483 | 0.874372483 | -5.619121324 |
| 1415776_at   | 0.011964722  | 7.063072659 | 0.162461708  | 0.874379769 | 0.874379769 | -5.619122814 |
| 1427568_a_at | -0.013692973 | 8.41804223  | -0.162454909 | 0.874384975 | 0.874384975 | -5.619123879 |
| 1430855_at   | -0.021053472 | 5.857581963 | -0.162399559 | 0.87442736  | 0.87442736  | -5.619132548 |

|              |              |             |              |             |             |              |
|--------------|--------------|-------------|--------------|-------------|-------------|--------------|
| 1420429_at   | -0.037066809 | 5.975821688 | -0.162256141 | 0.874537184 | 0.874537184 | -5.619154994 |
| 1450487_at   | 0.012998965  | 4.779512096 | 0.162246044  | 0.874544916 | 0.874544916 | -5.619156574 |
| 1421925_at   | -0.014862584 | 5.471117164 | -0.162219015 | 0.874565614 | 0.874565614 | -5.619160802 |
| 1419724_at   | -0.015254486 | 4.736643517 | -0.162211227 | 0.874571578 | 0.874571578 | -5.61916202  |
| 1452210_at   | 0.011418933  | 8.383464108 | 0.162200458  | 0.874579825 | 0.874579825 | -5.619163704 |
| 1444977_at   | -0.014483158 | 5.223494926 | -0.162184333 | 0.874592173 | 0.874592173 | -5.619166226 |
| 1434284_at   | -0.011794521 | 9.177615823 | -0.162156661 | 0.874613364 | 0.874613364 | -5.619170553 |
| 1420147_at   | -0.013720262 | 3.536562494 | -0.162108392 | 0.874650328 | 0.874650328 | -5.619178098 |
| 1418294_at   | 0.014519445  | 7.588288322 | 0.162095197  | 0.874660433 | 0.874660433 | -5.619180161 |
| 1434676_at   | -0.011173018 | 8.260497416 | -0.162043936 | 0.874699688 | 0.874699688 | -5.619188171 |
| 1436954_at   | 0.014793717  | 9.006384667 | 0.162019202  | 0.87471863  | 0.87471863  | -5.619192035 |
| 1433582_at   | 0.012903166  | 10.18073011 | 0.162010706  | 0.874725136 | 0.874725136 | -5.619193362 |
| 1459379_at   | -0.016724462 | 4.806164197 | -0.161995038 | 0.874737134 | 0.874737134 | -5.61919581  |
| 1423353_at   | -0.014027241 | 6.897432696 | -0.161991004 | 0.874740224 | 0.874740224 | -5.61919644  |
| 1437162_at   | -0.02901009  | 8.731551226 | -0.161974564 | 0.874752813 | 0.874752813 | -5.619199007 |
| 1423319_at   | 0.0180312    | 6.707392111 | 0.161890207  | 0.874817416 | 0.874817416 | -5.619212178 |
| 1448614_at   | 0.013962534  | 5.363769255 | 0.1618881    | 0.874819029 | 0.874819029 | -5.619212507 |
| 1442150_at   | 0.011303845  | 7.789805357 | 0.161824361  | 0.874867842 | 0.874867842 | -5.619222454 |
| 1415782_at   | 0.010153992  | 12.304436   | 0.161787984  | 0.874895701 | 0.874895701 | -5.61922813  |
| 1437147_at   | -0.015736705 | 3.26529548  | -0.161778228 | 0.874903173 | 0.874903173 | -5.619229652 |
| 1448682_at   | 0.012100895  | 12.37419864 | 0.161776564  | 0.874904447 | 0.874904447 | -5.619229911 |
| 1460643_at   | 0.016762882  | 7.611043725 | 0.161761098  | 0.874916291 | 0.874916291 | -5.619232323 |
| 1449172_a_at | 0.010973993  | 3.728339272 | 0.161757491  | 0.874919054 | 0.874919054 | -5.619232886 |
| 1456015_x_at | -0.014590257 | 10.48289977 | -0.161656318 | 0.874996537 | 0.874996537 | -5.619248661 |
| 1438266_at   | 0.009712913  | 4.149512434 | 0.161621001  | 0.875023585 | 0.875023585 | -5.619254165 |
| 1431039_at   | -0.015683233 | 7.64254543  | -0.16161777  | 0.875026059 | 0.875026059 | -5.619254668 |
| 1433842_at   | -0.018982643 | 8.46743027  | -0.161578643 | 0.875056025 | 0.875056025 | -5.619260765 |
| 1446069_at   | -0.017615882 | 4.346528787 | -0.16154347  | 0.875082963 | 0.875082963 | -5.619266244 |
| 1418423_s_at | -0.011947898 | 4.039515908 | -0.16152174  | 0.875099606 | 0.875099606 | -5.619269629 |
| 1433465_a_at | 0.035979047  | 7.218165927 | 0.161495227  | 0.875119911 | 0.875119911 | -5.619273757 |
| 1438215_at   | 0.018255886  | 8.700421607 | 0.161488884  | 0.875124769 | 0.875124769 | -5.619274745 |
| 1448001_x_at | -0.012234816 | 4.226044644 | -0.161467361 | 0.875141253 | 0.875141253 | -5.619278096 |
| 1456531_x_at | -0.016706373 | 11.83041032 | -0.161465406 | 0.875142751 | 0.875142751 | -5.619278401 |
| 1420030_at   | -0.017110681 | 3.431847565 | -0.161443803 | 0.875159296 | 0.875159296 | -5.619281764 |
| 1445575_at   | -0.012116838 | 4.025156609 | -0.161404058 | 0.875189736 | 0.875189736 | -5.61928795  |
| 1422133_at   | 0.01548683   | 5.819247351 | 0.161370243  | 0.875215635 | 0.875215635 | -5.619293212 |
| 1441186_at   | 0.016323294  | 4.056058993 | 0.161368799  | 0.875216741 | 0.875216741 | -5.619293436 |
| 1430535_at   | 0.012714877  | 8.995980984 | 0.161308647  | 0.875262811 | 0.875262811 | -5.619302794 |
| 1444458_at   | 0.011420287  | 6.326522966 | 0.161284614  | 0.875281218 | 0.875281218 | -5.619306532 |
| 1443397_at   | 0.02177725   | 4.476418734 | 0.161228692  | 0.875324049 | 0.875324049 | -5.619315227 |
| 1439905_at   | -0.012774921 | 4.932230851 | -0.161226753 | 0.875325535 | 0.875325535 | -5.619315528 |
| 1445823_at   | -0.015620628 | 3.31928779  | -0.161198727 | 0.875347    | 0.875347    | -5.619319885 |
| 1447159_at   | 0.016175748  | 4.970643612 | 0.161178705  | 0.875362335 | 0.875362335 | -5.619322997 |
| 1417165_at   | -0.011540086 | 9.331721383 | -0.161108163 | 0.875416365 | 0.875416365 | -5.619333957 |
| 1457995_at   | -0.012731573 | 4.185640856 | -0.161087899 | 0.875431886 | 0.875431886 | -5.619337105 |
| 1430164_a_at | 0.014605492  | 8.705761995 | 0.161031221  | 0.875475298 | 0.875475298 | -5.619345907 |
| 1456613_at   | 0.010801462  | 4.318369781 | 0.161008317  | 0.875492841 | 0.875492841 | -5.619349463 |
| 1439431_x_at | -0.010998036 | 3.06273654  | -0.160946955 | 0.875539841 | 0.875539841 | -5.619358987 |
| 1440521_x_at | 0.015737276  | 3.701931854 | 0.160917942  | 0.875562064 | 0.875562064 | -5.61936349  |
| 1445583_x_at | -0.014226311 | 4.684039235 | -0.160892932 | 0.87558122  | 0.87558122  | -5.61936737  |
| 1438640_x_at | 0.01405729   | 11.65878279 | 0.160852913  | 0.875611873 | 0.875611873 | -5.619373578 |
| 1430816_at   | -0.01439045  | 6.027737014 | -0.160715036 | 0.875717484 | 0.875717484 | -5.619394953 |
| 1434022_at   | 0.01380007   | 9.026687988 | 0.160671317  | 0.875750972 | 0.875750972 | -5.619401727 |

|              |              |             |              |             |             |              |
|--------------|--------------|-------------|--------------|-------------|-------------|--------------|
| 1424489_a_at | 0.010081929  | 8.498898957 | 0.160668799  | 0.8757529   | 0.8757529   | -5.619402117 |
| 1441404_at   | 0.01453914   | 6.753763183 | 0.160657014  | 0.875761928 | 0.875761928 | -5.619403943 |
| 1458758_at   | -0.011285074 | 3.778726646 | -0.160587531 | 0.875815151 | 0.875815151 | -5.619414704 |
| 1443584_at   | -0.016599499 | 4.110769248 | -0.160556523 | 0.875838904 | 0.875838904 | -5.619419505 |
| 1419706_a_at | 0.021656146  | 9.647035869 | 0.160475969  | 0.875900609 | 0.875900609 | -5.619431973 |
| 1435359_at   | -0.023629029 | 5.191913168 | -0.160428928 | 0.875936644 | 0.875936644 | -5.619439251 |
| 1423050_s_at | 0.010351377  | 11.09060405 | 0.160428499  | 0.875936972 | 0.875936972 | -5.619439318 |
| 1457392_at   | -0.014122824 | 9.217798853 | -0.160368304 | 0.875983083 | 0.875983083 | -5.619448628 |
| 1450182_at   | -0.014148911 | 6.113705284 | -0.160359567 | 0.875989776 | 0.875989776 | -5.619449979 |
| 1429423_at   | -0.01196155  | 6.571268527 | -0.160335537 | 0.876008184 | 0.876008184 | -5.619453694 |
| 1448316_at   | 0.010946239  | 9.594164692 | 0.160238585  | 0.876082453 | 0.876082453 | -5.619468679 |
| 1442333_a_at | -0.017216936 | 3.670622239 | -0.160144119 | 0.876154819 | 0.876154819 | -5.619483271 |
| 1432859_at   | 0.01698176   | 4.206955619 | 0.160118871  | 0.87617416  | 0.87617416  | -5.619487169 |
| 1419689_at   | -0.014875496 | 7.591473073 | -0.160115176 | 0.876176991 | 0.876176991 | -5.619487739 |
| 1435860_at   | 0.011487969  | 5.644716332 | 0.160063993  | 0.876216201 | 0.876216201 | -5.61949564  |
| 1420033_s_at | -0.010874459 | 8.877177635 | -0.160061724 | 0.876217939 | 0.876217939 | -5.619495991 |
| 1444260_at   | 0.050993582  | 6.031301388 | 0.160053837  | 0.876223981 | 0.876223981 | -5.619497208 |
| 1418875_at   | 0.01102794   | 4.260490828 | 0.160013259  | 0.876255067 | 0.876255067 | -5.61950347  |
| 1434767_at   | 0.015276525  | 8.254025833 | 0.159979315  | 0.876281071 | 0.876281071 | -5.619508707 |
| 1432642_at   | -0.012733252 | 3.018304821 | -0.159970023 | 0.876288189 | 0.876288189 | -5.61951014  |
| 1446422_at   | -0.010769278 | 4.67044209  | -0.159950963 | 0.876302791 | 0.876302791 | -5.61951308  |
| 1428886_at   | -0.01226689  | 8.969208079 | -0.159872335 | 0.876363027 | 0.876363027 | -5.619525204 |
| 1415883_a_at | -0.014773761 | 4.216379864 | -0.159833857 | 0.876392505 | 0.876392505 | -5.619531135 |
| 1453104_at   | 0.011660009  | 9.712788026 | 0.159832884  | 0.87639325  | 0.87639325  | -5.619531285 |
| 1446764_at   | -0.014672682 | 4.641466074 | -0.159811829 | 0.876409381 | 0.876409381 | -5.61953453  |
| 1434740_at   | -0.017579344 | 10.17542326 | -0.159695408 | 0.876498573 | 0.876498573 | -5.619552464 |
| 1418701_at   | -0.016933508 | 8.223014803 | -0.159693979 | 0.876499668 | 0.876499668 | -5.619552684 |
| 1433083_at   | -0.012531703 | 3.526814271 | -0.159656489 | 0.876528389 | 0.876528389 | -5.619558456 |
| 1424362_at   | 0.017832058  | 5.611589945 | 0.159638601  | 0.876542094 | 0.876542094 | -5.61956121  |
| 1416471_at   | -0.009942175 | 9.75331932  | -0.159635857 | 0.876544196 | 0.876544196 | -5.619561633 |
| 1416926_at   | 0.014980326  | 9.50298291  | 0.15961712   | 0.876558551 | 0.876558551 | -5.619564517 |
| 1418787_at   | 0.016873333  | 3.85446852  | 0.159589337  | 0.876579837 | 0.876579837 | -5.619568793 |
| 1457198_at   | 0.015064273  | 9.05119724  | 0.1595802    | 0.876586837 | 0.876586837 | -5.619570198 |
| 1427900_at   | -0.011133321 | 4.044332247 | -0.159575005 | 0.876590817 | 0.876590817 | -5.619570998 |
| 1417657_s_at | 0.012139027  | 8.642057353 | 0.159556622  | 0.876604901 | 0.876604901 | -5.619573826 |
| 1421394_a_at | 0.012707973  | 5.709105831 | 0.159536784  | 0.8766201   | 0.8766201   | -5.619576878 |
| 1459336_at   | 0.011399192  | 3.401700965 | 0.159533435  | 0.876622665 | 0.876622665 | -5.619577394 |
| 1433130_at   | -0.014300123 | 3.799303315 | -0.159520581 | 0.876632513 | 0.876632513 | -5.619579371 |
| 1441475_at   | 0.01586743   | 6.701294397 | 0.159500384  | 0.876647987 | 0.876647987 | -5.619582478 |
| 1451392_at   | 0.013703297  | 6.467802279 | 0.159484848  | 0.876659891 | 0.876659891 | -5.619584867 |
| 1420865_at   | -0.012982819 | 8.579668326 | -0.15944426  | 0.876690987 | 0.876690987 | -5.619591108 |
| 1441188_at   | 0.014997935  | 3.691288801 | 0.159438819  | 0.876695155 | 0.876695155 | -5.619591945 |
| 1456540_s_at | 0.02373197   | 7.981632826 | 0.159430295  | 0.876701686 | 0.876701686 | -5.619593255 |
| 1446234_at   | 0.02318952   | 7.565082353 | 0.159387918  | 0.876734154 | 0.876734154 | -5.619599769 |
| 1448157_s_at | -0.009488783 | 13.65996143 | -0.159338163 | 0.876772275 | 0.876772275 | -5.619607415 |
| 1424401_at   | 0.014142318  | 3.739097559 | 0.159334719  | 0.876774913 | 0.876774913 | -5.619607944 |
| 1431541_at   | 0.015124002  | 4.499231106 | 0.159291472  | 0.876808048 | 0.876808048 | -5.619614588 |
| 1450555_at   | 0.010622513  | 3.168804765 | 0.159203337  | 0.876875575 | 0.876875575 | -5.619628122 |
| 1437694_at   | -0.019747861 | 4.947711771 | -0.159188649 | 0.876886829 | 0.876886829 | -5.619630377 |
| 1436277_at   | 0.010334043  | 3.974643605 | 0.159113254  | 0.876944597 | 0.876944597 | -5.619641948 |
| 1454615_x_at | 0.013236303  | 11.14500656 | 0.159090177  | 0.876962278 | 0.876962278 | -5.619645488 |
| 1419515_at   | 0.013592072  | 6.375237541 | 0.15907818   | 0.87697147  | 0.87697147  | -5.619647328 |
| 1451609_at   | -0.018358044 | 5.231781043 | -0.159035008 | 0.877004549 | 0.877004549 | -5.61965395  |

|              |              |             |              |             |             |              |
|--------------|--------------|-------------|--------------|-------------|-------------|--------------|
| 1448769_at   | 0.010570138  | 10.16466932 | 0.159003561  | 0.877028644 | 0.877028644 | -5.619658772 |
| 1421399_at   | 0.010753764  | 3.81903956  | 0.15891068   | 0.877099811 | 0.877099811 | -5.619673009 |
| 1424220_a_at | 0.010616519  | 6.957672204 | 0.158884741  | 0.877119687 | 0.877119687 | -5.619676984 |
| 1430066_at   | -0.010145112 | 7.449037221 | -0.158855928 | 0.877141764 | 0.877141764 | -5.619681398 |
| 1436043_at   | -0.016689453 | 3.428803055 | -0.158808125 | 0.877178393 | 0.877178393 | -5.61968872  |
| 1436299_at   | -0.009989239 | 9.771264759 | -0.158772816 | 0.877205448 | 0.877205448 | -5.619694126 |
| 1418821_at   | -0.014072138 | 4.736354279 | -0.15875922  | 0.877215866 | 0.877215866 | -5.619696208 |
| 1438504_x_at | 0.012060591  | 8.440025543 | 0.158682418  | 0.877274715 | 0.877274715 | -5.619707963 |
| 1430605_at   | 0.012038732  | 5.055575888 | 0.158680728  | 0.877276011 | 0.877276011 | -5.619708221 |
| 1449942_a_at | 0.019319228  | 10.35604042 | 0.158637144  | 0.877309407 | 0.877309407 | -5.619714889 |
| 1428576_at   | 0.011737884  | 7.75948978  | 0.158604344  | 0.877334541 | 0.877334541 | -5.619719907 |
| 1449243_a_at | 0.009411873  | 13.34477608 | 0.158570947  | 0.877360132 | 0.877360132 | -5.619725014 |
| 1441540_at   | 0.012703294  | 5.080815466 | 0.158562125  | 0.877366892 | 0.877366892 | -5.619726363 |
| 1427497_at   | 0.010761808  | 4.141433975 | 0.158533247  | 0.87738902  | 0.87738902  | -5.619730778 |
| 1442937_at   | -0.009478908 | 3.252371165 | -0.158473775 | 0.877434593 | 0.877434593 | -5.619739868 |
| 1430145_at   | -0.01692631  | 4.127260015 | -0.158460662 | 0.877444641 | 0.877444641 | -5.619741872 |
| 1428759_s_at | -0.009856563 | 8.15637844  | -0.158456941 | 0.877447493 | 0.877447493 | -5.619742441 |
| 1430499_at   | 0.014595113  | 3.531477836 | 0.158388656  | 0.877499819 | 0.877499819 | -5.619752873 |
| 1451223_a_at | 0.010644862  | 9.578013174 | 0.158377931  | 0.877508038 | 0.877508038 | -5.619754511 |
| 1429277_at   | -0.010593293 | 4.625481813 | -0.158375221 | 0.877510114 | 0.877510114 | -5.619754925 |
| 1416533_at   | 0.010319839  | 9.234839321 | 0.158367575  | 0.877515973 | 0.877515973 | -5.619756092 |
| 1431975_at   | 0.012583978  | 3.473980478 | 0.158320172  | 0.877552299 | 0.877552299 | -5.619763331 |
| 1457124_at   | -0.016791171 | 3.694992551 | -0.158296061 | 0.877570775 | 0.877570775 | -5.619767011 |
| 1440511_at   | 0.040991501  | 7.816636325 | 0.158288969  | 0.87757621  | 0.87757621  | -5.619768094 |
| 1431861_a_at | -0.013892515 | 6.90966019  | -0.158269067 | 0.877591461 | 0.877591461 | -5.619771131 |
| 1444663_at   | 0.018994144  | 4.557456243 | 0.158242366  | 0.877611922 | 0.877611922 | -5.619775206 |
| 1436883_at   | -0.014069033 | 8.912787842 | -0.158203108 | 0.877642006 | 0.877642006 | -5.619781196 |
| 1417713_at   | -0.009835386 | 10.67945596 | -0.158197562 | 0.877646256 | 0.877646256 | -5.619782042 |
| 1422946_a_at | -0.014764993 | 9.711723148 | -0.158194872 | 0.877648317 | 0.877648317 | -5.619782453 |
| 1431597_a_at | -0.013964379 | 3.417328138 | -0.158192455 | 0.87765017  | 0.87765017  | -5.619782821 |
| 1460552_at   | 0.010940742  | 10.73108894 | 0.158174828  | 0.877663678 | 0.877663678 | -5.61978551  |
| 1432284_at   | -0.01743917  | 4.78856427  | -0.158171942 | 0.87766589  | 0.87766589  | -5.61978595  |
| 1436759_x_at | 0.018252716  | 11.49415086 | 0.15814899   | 0.877683479 | 0.877683479 | -5.619789451 |
| 1455533_at   | 0.012992271  | 7.289487598 | 0.15811707   | 0.87770794  | 0.87770794  | -5.619794319 |
| 1457863_at   | -0.012318442 | 3.104822394 | -0.158072027 | 0.877742457 | 0.877742457 | -5.619801186 |
| 1426134_at   | 0.012458514  | 3.495618221 | 0.158035204  | 0.877770677 | 0.877770677 | -5.619806798 |
| 1434440_at   | -0.011557745 | 8.697489088 | -0.158031867 | 0.877773234 | 0.877773234 | -5.619807307 |
| 1425430_at   | -0.009613167 | 3.369028728 | -0.157976362 | 0.87781577  | 0.87781577  | -5.619815764 |
| 1435391_at   | 0.010770703  | 8.289456362 | 0.157823378  | 0.877933012 | 0.877933012 | -5.619839059 |
| 1438808_at   | 0.022581548  | 4.055891523 | 0.157793314  | 0.877956052 | 0.877956052 | -5.619843634 |
| 1456330_at   | 0.013760076  | 4.191976152 | 0.157767213  | 0.877976055 | 0.877976055 | -5.619847605 |
| 1447028_at   | 0.020497429  | 7.741122992 | 0.157739705  | 0.877997137 | 0.877997137 | -5.61985179  |
| 1445264_at   | 0.012382148  | 5.385235601 | 0.157732865  | 0.878002379 | 0.878002379 | -5.61985283  |
| 1419343_at   | -0.014823887 | 3.443356998 | -0.157719238 | 0.878012822 | 0.878012822 | -5.619854903 |
| 1433461_at   | 0.014339623  | 10.44614312 | 0.157687875  | 0.878036859 | 0.878036859 | -5.619859673 |
| 1437111_at   | 0.010638877  | 7.253350179 | 0.15767423   | 0.878047316 | 0.878047316 | -5.619861748 |
| 1420115_at   | -0.01358988  | 7.231171047 | -0.157644073 | 0.878070428 | 0.878070428 | -5.619866333 |
| 1427520_a_at | -0.01926932  | 3.73839325  | -0.157637449 | 0.878075505 | 0.878075505 | -5.61986734  |
| 1460168_at   | 0.010375429  | 10.820653   | 0.157560455  | 0.878134514 | 0.878134514 | -5.619879041 |
| 1459040_at   | 0.010673458  | 4.040740723 | 0.157556109  | 0.878137844 | 0.878137844 | -5.619879702 |
| 1418338_at   | -0.011358849 | 9.562057984 | -0.157517561 | 0.878167388 | 0.878167388 | -5.619885558 |
| 1418229_s_at | -0.012616167 | 8.815941639 | -0.157446816 | 0.878221608 | 0.878221608 | -5.619896302 |
| 1420679_a_at | 0.012343885  | 7.213307078 | 0.157422517  | 0.878240232 | 0.878240232 | -5.619899991 |

|              |              |             |              |             |             |              |
|--------------|--------------|-------------|--------------|-------------|-------------|--------------|
| 1436411_at   | -0.012248357 | 3.69561147  | -0.157405667 | 0.878253146 | 0.878253146 | -5.619902549 |
| 1428351_at   | -0.010616359 | 9.182264358 | -0.157397182 | 0.878259649 | 0.878259649 | -5.619903837 |
| 1420582_at   | -0.01161257  | 3.594163453 | -0.157396736 | 0.878259991 | 0.878259991 | -5.619903905 |
| 1422823_at   | 0.010728551  | 7.631108732 | 0.157386796  | 0.878267609 | 0.878267609 | -5.619905413 |
| 1441325_at   | -0.014357555 | 4.28009367  | -0.157378398 | 0.878274046 | 0.878274046 | -5.619906688 |
| 1437826_at   | 0.013832497  | 3.022443113 | 0.157341332  | 0.878302454 | 0.878302454 | -5.619912313 |
| 1423643_at   | -0.011232891 | 10.03979948 | -0.157334755 | 0.878307495 | 0.878307495 | -5.619913311 |
| 1445670_at   | -0.014112579 | 4.927885465 | -0.157322441 | 0.878316933 | 0.878316933 | -5.619915179 |
| 1446759_at   | 0.010638864  | 6.974238856 | 0.157310684  | 0.878325944 | 0.878325944 | -5.619916963 |
| 1456509_at   | 0.011200298  | 4.341467449 | 0.157280743  | 0.878348892 | 0.878348892 | -5.619921504 |
| 1416283_at   | 0.011660041  | 9.426958268 | 0.157260006  | 0.878364786 | 0.878364786 | -5.619924649 |
| 1452467_at   | -0.011956655 | 7.338219812 | -0.157249559 | 0.878372793 | 0.878372793 | -5.619926234 |
| 1433805_at   | 0.011303337  | 9.565597222 | 0.157202511  | 0.878408853 | 0.878408853 | -5.619933367 |
| 1438690_at   | -0.021479645 | 4.532258844 | -0.157150424 | 0.878448775 | 0.878448775 | -5.619941262 |
| 1427985_at   | -0.015356437 | 7.926387364 | -0.157057371 | 0.878520098 | 0.878520098 | -5.619955361 |
| 1450924_at   | 0.033707836  | 7.634867444 | 0.156980028  | 0.87857938  | 0.87857938  | -5.619967072 |
| 1421134_at   | -0.017778816 | 3.483119564 | -0.156922865 | 0.878623195 | 0.878623195 | -5.619975724 |
| 1425860_x_at | -0.017053032 | 8.668982431 | -0.156889016 | 0.878649139 | 0.878649139 | -5.619980846 |
| 1429227_x_at | -0.009729956 | 11.1945191  | -0.156848853 | 0.878679925 | 0.878679925 | -5.619986922 |
| 1448798_at   | 0.009747031  | 4.242741574 | 0.156804953  | 0.878713574 | 0.878713574 | -5.619993562 |
| 1437668_at   | -0.011573204 | 3.619030171 | -0.156747657 | 0.878757493 | 0.878757493 | -5.620002224 |
| 1447076_at   | 0.011507545  | 3.659268113 | 0.156677426  | 0.878811326 | 0.878811326 | -5.620012838 |
| 1441463_at   | 0.025906188  | 6.428102191 | 0.156670025  | 0.878816999 | 0.878816999 | -5.620013957 |
| 1449102_at   | 0.056460503  | 5.697723664 | 0.156639501  | 0.878840396 | 0.878840396 | -5.620018568 |
| 1428888_at   | 0.016550048  | 6.304585166 | 0.156635482  | 0.878843477 | 0.878843477 | -5.620019175 |
| 1442530_at   | -0.011558274 | 3.816887101 | -0.156619342 | 0.878855849 | 0.878855849 | -5.620021613 |
| 1447326_s_at | -0.017610368 | 7.569963773 | -0.156592689 | 0.87887628  | 0.87887628  | -5.620025638 |
| 1434392_at   | -0.01108498  | 10.41779995 | -0.156587692 | 0.878880109 | 0.878880109 | -5.620026393 |
| 1441328_at   | 0.017076682  | 7.839864191 | 0.156565809  | 0.878896884 | 0.878896884 | -5.620029697 |
| 1435739_at   | 0.01010475   | 9.96094868  | 0.156544879  | 0.878912927 | 0.878912927 | -5.620032857 |
| 1433354_at   | -0.012994182 | 3.854579528 | -0.156521827 | 0.878930598 | 0.878930598 | -5.620036337 |
| 1430437_a_at | -0.016821306 | 5.872884739 | -0.156497354 | 0.878949358 | 0.878949358 | -5.620040031 |
| 1454315_at   | -0.010624288 | 5.113202583 | -0.15642209  | 0.879007052 | 0.879007052 | -5.620051388 |
| 1438923_at   | 0.013223538  | 4.607875443 | 0.156298623  | 0.879101698 | 0.879101698 | -5.620070006 |
| 1430037_at   | 0.009951671  | 7.930558017 | 0.156264275  | 0.879128028 | 0.879128028 | -5.620075182 |
| 1449772_at   | 0.014094702  | 4.22290157  | 0.156257075  | 0.879133547 | 0.879133547 | -5.620076267 |
| 1441455_at   | -0.018606754 | 5.704445411 | -0.156246225 | 0.879141865 | 0.879141865 | -5.620077902 |
| 1440934_at   | -0.016132397 | 6.575067141 | -0.156178914 | 0.879193464 | 0.879193464 | -5.620088043 |
| 1419562_at   | -0.015134542 | 9.657007445 | -0.156157509 | 0.879209874 | 0.879209874 | -5.620091267 |
| 1460500_at   | -0.041109912 | 4.913880823 | -0.156142253 | 0.879221568 | 0.879221568 | -5.620093564 |
| 1452049_at   | 0.010872742  | 10.01210754 | 0.156091111  | 0.879260774 | 0.879260774 | -5.620101264 |
| 1445748_at   | -0.011234821 | 4.167087275 | -0.156050499 | 0.879291907 | 0.879291907 | -5.620107377 |
| 1452312_at   | 0.020393299  | 6.945144    | 0.156006436  | 0.879325687 | 0.879325687 | -5.620114007 |
| 1431304_a_at | 0.011459021  | 7.321505844 | 0.155994703  | 0.879334682 | 0.879334682 | -5.620115772 |
| 1427242_at   | 0.025412727  | 3.649612101 | 0.155972131  | 0.879351985 | 0.879351985 | -5.620119168 |
| 1416082_at   | -0.010704384 | 12.26805508 | -0.155937933 | 0.879378202 | 0.879378202 | -5.620124312 |
| 1445055_at   | -0.010409409 | 3.367642223 | -0.155910331 | 0.879399362 | 0.879399362 | -5.620128462 |
| 1430738_at   | -0.011537518 | 3.774068877 | -0.155867743 | 0.879432012 | 0.879432012 | -5.620134865 |
| 1438179_s_at | -0.010927004 | 11.27963725 | -0.155838293 | 0.879454589 | 0.879454589 | -5.620139291 |
| 1436711_at   | -0.011110091 | 7.751282521 | -0.155762557 | 0.879512652 | 0.879512652 | -5.620150671 |
| 1452301_at   | 0.010551484  | 5.1392554   | 0.155742496  | 0.879528031 | 0.879528031 | -5.620153685 |
| 1436670_x_at | -0.015846934 | 3.753043143 | -0.155611366 | 0.879628563 | 0.879628563 | -5.620173372 |
| 1437538_at   | 0.011108791  | 8.608883139 | 0.155604312  | 0.879633972 | 0.879633972 | -5.620174431 |



|              |              |             |              |             |             |              |
|--------------|--------------|-------------|--------------|-------------|-------------|--------------|
| 1442679_at   | 0.018670091  | 7.077277067 | 0.155595172  | 0.879640979 | 0.879640979 | -5.620175802 |
| 1440731_at   | -0.011990813 | 5.448657661 | -0.155575303 | 0.879656212 | 0.879656212 | -5.620178784 |
| 1458200_at   | -0.014856057 | 6.11789597  | -0.155545976 | 0.879678696 | 0.879678696 | -5.620183184 |
| 1432890_at   | 0.012108156  | 3.591257286 | 0.15553653   | 0.879685938 | 0.879685938 | -5.6201846   |
| 1434059_at   | -0.011196731 | 7.699934915 | -0.155506727 | 0.879708787 | 0.879708787 | -5.620189071 |
| 1431314_a_at | -0.035401337 | 7.274554263 | -0.155476925 | 0.879731636 | 0.879731636 | -5.62019354  |
| 1442686_at   | -0.014698531 | 4.675505935 | -0.155472848 | 0.879734762 | 0.879734762 | -5.620194151 |
| 1450602_at   | -0.012357628 | 3.433933706 | -0.155467444 | 0.879738905 | 0.879738905 | -5.620194961 |
| 1452923_at   | -0.011629454 | 7.982413934 | -0.155430451 | 0.879767267 | 0.879767267 | -5.620200507 |
| 1438039_at   | 0.012113283  | 10.35232108 | 0.155418377  | 0.879776524 | 0.879776524 | -5.620202317 |
| 1448114_a_at | 0.011962047  | 9.39812501  | 0.155418279  | 0.879776599 | 0.879776599 | -5.620202332 |
| 1429168_at   | -0.012382395 | 5.330250015 | -0.155339217 | 0.879837216 | 0.879837216 | -5.620214179 |
| 1443992_at   | -0.020669208 | 6.149872391 | -0.155304972 | 0.879863471 | 0.879863471 | -5.620219309 |
| 1457458_at   | -0.049744785 | 6.642846701 | -0.155250631 | 0.879905136 | 0.879905136 | -5.620227447 |
| 1415682_at   | 0.010549945  | 8.520659669 | 0.15524166   | 0.879912013 | 0.879912013 | -5.62022879  |
| 1449564_at   | -0.017542162 | 4.821249756 | -0.155232999 | 0.879918654 | 0.879918654 | -5.620230087 |
| 1449654_s_at | -0.017923007 | 3.989728338 | -0.155215275 | 0.879932243 | 0.879932243 | -5.62023274  |
| 1419210_at   | -0.014507597 | 3.821847539 | -0.155145118 | 0.879986034 | 0.879986034 | -5.62024324  |
| 1429005_at   | -0.011134433 | 8.94560632  | -0.155140613 | 0.879989488 | 0.879989488 | -5.620243914 |
| 1443819_x_at | 0.00999311   | 8.240913418 | 0.155091249  | 0.880027338 | 0.880027338 | -5.620251299 |
| 1457487_at   | 0.013978527  | 4.03392146  | 0.155090539  | 0.880027882 | 0.880027882 | -5.620251405 |
| 1455501_at   | 0.024352706  | 5.341235942 | 0.155089926  | 0.880028352 | 0.880028352 | -5.620251497 |
| 1419579_at   | -0.012064588 | 3.544237597 | -0.155083353 | 0.880033391 | 0.880033391 | -5.62025248  |
| 1452111_at   | 0.010850613  | 8.865764201 | 0.155062966  | 0.880049023 | 0.880049023 | -5.620255529 |
| 1454070_a_at | -0.012428998 | 6.249855487 | -0.155041195 | 0.880065716 | 0.880065716 | -5.620258785 |
| 1433247_at   | -0.013418348 | 3.174102631 | -0.155024569 | 0.880078464 | 0.880078464 | -5.620261271 |
| 1447460_at   | 0.01369244   | 4.540546496 | 0.154911388  | 0.880165245 | 0.880165245 | -5.620278186 |
| 1438136_at   | 0.012898059  | 4.739628522 | 0.154885434  | 0.880185145 | 0.880185145 | -5.620282064 |
| 1448908_at   | -0.010360461 | 10.13532936 | -0.154859644 | 0.88020492  | 0.88020492  | -5.620285916 |
| 1446076_at   | -0.013345759 | 3.721934797 | -0.154781126 | 0.880265125 | 0.880265125 | -5.62029764  |
| 1442196_at   | 0.015559057  | 4.766977692 | 0.15472845   | 0.880305517 | 0.880305517 | -5.620305502 |
| 1452741_s_at | -0.010482022 | 5.951048022 | -0.154710199 | 0.880319511 | 0.880319511 | -5.620308225 |
| 1451330_a_at | -0.012555004 | 8.536242644 | -0.154693857 | 0.880332042 | 0.880332042 | -5.620310664 |
| 1442629_at   | 0.019233723  | 5.340779501 | 0.154679811  | 0.880342813 | 0.880342813 | -5.620312759 |
| 1443529_at   | -0.013007485 | 4.673164589 | -0.15466919  | 0.880350956 | 0.880350956 | -5.620314344 |
| 1449009_at   | -0.015598848 | 4.719607948 | -0.154663581 | 0.880355258 | 0.880355258 | -5.62031518  |
| 1432237_at   | -0.012729396 | 4.360080476 | -0.154613914 | 0.880393341 | 0.880393341 | -5.620322588 |
| 1418554_at   | -0.011209057 | 5.293801023 | -0.154607693 | 0.880398112 | 0.880398112 | -5.620323516 |
| 1457949_at   | -0.013144039 | 5.715430747 | -0.154604505 | 0.880400556 | 0.880400556 | -5.620323991 |
| 1421169_at   | 0.012803875  | 4.23650925  | 0.15457002   | 0.880426999 | 0.880426999 | -5.620329132 |
| 1443842_at   | 0.015258899  | 3.394971205 | 0.154563437  | 0.880432047 | 0.880432047 | -5.620330114 |
| 1454290_at   | -0.012939132 | 4.038463855 | -0.154555198 | 0.880438365 | 0.880438365 | -5.620331342 |
| 1421748_a_at | 0.011980701  | 6.381680482 | 0.154541657  | 0.880448748 | 0.880448748 | -5.62033336  |
| 1442737_at   | -0.016346143 | 4.389713858 | -0.154493649 | 0.880485561 | 0.880485561 | -5.620340515 |
| 1419382_a_at | -0.014042973 | 8.754603501 | -0.154470789 | 0.880503091 | 0.880503091 | -5.620343921 |
| 1437416_at   | -0.011208497 | 3.051528621 | -0.15446669  | 0.880506234 | 0.880506234 | -5.620344531 |
| 1460264_at   | -0.012366827 | 4.56463069  | -0.154445143 | 0.880522757 | 0.880522757 | -5.620347741 |
| 1453942_at   | 0.013573999  | 4.093217858 | 0.154420183  | 0.880541896 | 0.880541896 | -5.620351459 |
| 1418689_at   | -0.012281278 | 3.255625073 | -0.154374023 | 0.880577293 | 0.880577293 | -5.620358333 |
| 1445810_at   | 0.013782042  | 3.702638672 | 0.154364138  | 0.880584873 | 0.880584873 | -5.620359804 |
| 1427718_a_at | -0.010240873 | 8.542936959 | -0.154354994 | 0.880591885 | 0.880591885 | -5.620361165 |
| 1441478_at   | -0.012903994 | 4.581917047 | -0.154309433 | 0.880626823 | 0.880626823 | -5.620367947 |
| 1421010_at   | 0.014686654  | 3.522206199 | 0.154307751  | 0.880628113 | 0.880628113 | -5.620368198 |

|              |              |             |              |             |             |              |
|--------------|--------------|-------------|--------------|-------------|-------------|--------------|
| 1421542_at   | 0.016397008  | 4.142900704 | 0.154283063  | 0.880647044 | 0.880647044 | -5.620371871 |
| 1454745_at   | -0.01049173  | 10.79555377 | -0.154257468 | 0.880666672 | 0.880666672 | -5.62037568  |
| 1445789_at   | 0.017913061  | 3.902054943 | 0.154220509  | 0.880695014 | 0.880695014 | -5.620381178 |
| 1429353_a_at | -0.011444863 | 3.827029655 | -0.154209444 | 0.880703499 | 0.880703499 | -5.620382823 |
| 1429739_a_at | 0.014183452  | 8.851552484 | 0.15420468   | 0.880707152 | 0.880707152 | -5.620383532 |
| 1428106_at   | -0.014517529 | 8.374581486 | -0.154097827 | 0.880789093 | 0.880789093 | -5.620399418 |
| 1445363_at   | 0.018795     | 8.327831032 | 0.15407561   | 0.88080613  | 0.88080613  | -5.62040272  |
| 1438447_at   | -0.011523918 | 7.039080333 | -0.154073284 | 0.880807914 | 0.880807914 | -5.620403066 |
| 1420208_at   | -0.011872203 | 3.614212109 | -0.154056485 | 0.880820797 | 0.880820797 | -5.620405562 |
| 1430809_at   | -0.01530743  | 3.453760018 | -0.154024206 | 0.880845551 | 0.880845551 | -5.620410358 |
| 1417722_at   | -0.013149243 | 10.06033093 | -0.154020699 | 0.88084824  | 0.88084824  | -5.620410879 |
| 1449449_at   | -0.020286216 | 6.294440214 | -0.154010846 | 0.880855796 | 0.880855796 | -5.620412342 |
| 1422567_at   | -0.020450736 | 6.274366942 | -0.153992289 | 0.880870027 | 0.880870027 | -5.620415098 |
| 1416897_at   | 0.011048528  | 6.813035892 | 0.153951643  | 0.880901198 | 0.880901198 | -5.620421135 |
| 1459443_at   | -0.014561628 | 5.088438968 | -0.153941246 | 0.880909171 | 0.880909171 | -5.620422678 |
| 1429865_at   | 0.012420954  | 3.333244414 | 0.153938861  | 0.880911    | 0.880911    | -5.620423032 |
| 1459344_at   | 0.015871008  | 5.539121499 | 0.153926416  | 0.880920544 | 0.880920544 | -5.62042488  |
| 1440155_at   | -0.009916401 | 4.476960433 | -0.153915893 | 0.880928614 | 0.880928614 | -5.620426442 |
| 1428040_at   | 0.012713647  | 3.892827043 | 0.15386319   | 0.880969031 | 0.880969031 | -5.620434265 |
| 1436322_a_at | 0.015211838  | 8.792047282 | 0.153780138  | 0.881032724 | 0.881032724 | -5.620446586 |
| 1436642_x_at | 0.013193791  | 5.488953616 | 0.153740948  | 0.881062779 | 0.881062779 | -5.620452398 |
| 1455231_s_at | 0.013845432  | 5.48652469  | 0.153736323  | 0.881066327 | 0.881066327 | -5.620453084 |
| 1444868_at   | -0.018105717 | 3.819982668 | -0.153711422 | 0.881085423 | 0.881085423 | -5.620456776 |
| 1429606_at   | -0.020267304 | 4.642021595 | -0.153668974 | 0.881117977 | 0.881117977 | -5.620463068 |
| 1454374_at   | 0.01280337   | 3.819703621 | 0.153666393  | 0.881119957 | 0.881119957 | -5.62046345  |
| 1422423_at   | -0.010060306 | 5.341319968 | -0.153664921 | 0.881121086 | 0.881121086 | -5.620463669 |
| 1425712_at   | -0.011764026 | 4.8106853   | -0.153636298 | 0.881143037 | 0.881143037 | -5.62046791  |
| 1454766_at   | 0.011781233  | 7.704738973 | 0.153626898  | 0.881150247 | 0.881150247 | -5.620469303 |
| 1451792_a_at | 0.012368353  | 7.359264136 | 0.153495445  | 0.881251062 | 0.881251062 | -5.620488773 |
| 1436080_at   | 0.012007018  | 4.359504098 | 0.153456081  | 0.881281252 | 0.881281252 | -5.6204946   |
| 1429318_a_at | -0.012086815 | 11.06535473 | -0.153418009 | 0.881310452 | 0.881310452 | -5.620500234 |
| 1423586_at   | 0.0162077    | 9.639881393 | 0.153402838  | 0.881322087 | 0.881322087 | -5.620502479 |
| 1436007_a_at | -0.009962336 | 9.271013337 | -0.153400495 | 0.881323884 | 0.881323884 | -5.620502825 |
| 1441043_at   | -0.016820781 | 4.47905359  | -0.153379607 | 0.881339904 | 0.881339904 | -5.620505916 |
| 1430623_s_at | -0.015084485 | 6.161555616 | -0.153316336 | 0.881388431 | 0.881388431 | -5.620515274 |
| 1444792_at   | -0.012589421 | 3.395203807 | -0.153244342 | 0.881443648 | 0.881443648 | -5.620525917 |
| 1434486_x_at | -0.010398578 | 9.791215603 | -0.153234138 | 0.881451474 | 0.881451474 | -5.620527425 |
| 1457862_at   | -0.009692387 | 2.963341385 | -0.15319642  | 0.881480403 | 0.881480403 | -5.620532999 |
| 1418552_at   | 0.013695398  | 3.750458347 | 0.153172533  | 0.881498724 | 0.881498724 | -5.620536528 |
| 1453072_at   | 0.022446134  | 5.362089681 | 0.153154266  | 0.881512735 | 0.881512735 | -5.620539227 |
| 1451801_at   | -0.021959696 | 3.492241877 | -0.153113896 | 0.881543698 | 0.881543698 | -5.62054519  |
| 1449114_at   | -0.018164069 | 5.660394846 | -0.153030747 | 0.881607474 | 0.881607474 | -5.620557466 |
| 1426928_at   | 0.009411905  | 4.961378592 | 0.153016198  | 0.881618632 | 0.881618632 | -5.620559613 |
| 1454573_at   | 0.020002086  | 4.872322291 | 0.152990745  | 0.881638155 | 0.881638155 | -5.620563369 |
| 1450741_at   | 0.010590073  | 8.109566272 | 0.152967209  | 0.881656207 | 0.881656207 | -5.620566842 |
| 1421310_at   | -0.014861096 | 4.139061374 | -0.152878185 | 0.88172449  | 0.88172449  | -5.620579973 |
| 1451315_at   | -0.009366922 | 7.350920095 | -0.152804128 | 0.881781294 | 0.881781294 | -5.62059089  |
| 1447241_at   | 0.012635461  | 7.2726067   | 0.152758453  | 0.881816329 | 0.881816329 | -5.620597621 |
| 1452929_at   | -0.015091193 | 8.950590567 | -0.152747553 | 0.881824689 | 0.881824689 | -5.620599227 |
| 1436102_at   | -0.011783816 | 7.781674765 | -0.152731912 | 0.881836687 | 0.881836687 | -5.620601531 |
| 1424202_at   | 0.010386111  | 8.450632181 | 0.152719961  | 0.881845853 | 0.881845853 | -5.620603292 |
| 1435891_x_at | -0.024339506 | 5.554760211 | -0.152687067 | 0.881871084 | 0.881871084 | -5.620608136 |
| 1441077_at   | -0.015071638 | 6.88968383  | -0.15266967  | 0.881884429 | 0.881884429 | -5.620610698 |

|              |              |             |              |             |             |              |
|--------------|--------------|-------------|--------------|-------------|-------------|--------------|
| 1421424_a_at | -0.019251793 | 5.261986339 | -0.152621671 | 0.881921247 | 0.881921247 | -5.620617765 |
| 1442550_at   | 0.014227431  | 3.871317132 | 0.152601901  | 0.881936412 | 0.881936412 | -5.620620675 |
| 1418052_at   | 0.009935478  | 7.428663569 | 0.152597334  | 0.881939915 | 0.881939915 | -5.620621348 |
| 1429382_at   | 0.010673114  | 7.988441184 | 0.152592003  | 0.881944004 | 0.881944004 | -5.620622132 |
| 1445044_at   | 0.016041919  | 3.71269306  | 0.152585246  | 0.881949187 | 0.881949187 | -5.620623127 |
| 1416814_at   | 0.013704316  | 10.09776016 | 0.152411166  | 0.882082719 | 0.882082719 | -5.620648732 |
| 1459790_x_at | -0.042977663 | 5.020393373 | -0.152386902 | 0.882101331 | 0.882101331 | -5.620652299 |
| 1458992_at   | -0.010313812 | 3.924882467 | -0.152353028 | 0.882127315 | 0.882127315 | -5.620657277 |
| 1421978_at   | -0.009992702 | 3.886185981 | -0.152303217 | 0.882165526 | 0.882165526 | -5.620664596 |
| 1453948_at   | -0.011746821 | 3.540104545 | -0.152294348 | 0.882172329 | 0.882172329 | -5.620665898 |
| 1445254_at   | 0.019481531  | 3.757008689 | 0.152281504  | 0.882182182 | 0.882182182 | -5.620667785 |
| 1421303_at   | -0.011219748 | 6.076928102 | -0.152268303 | 0.882192308 | 0.882192308 | -5.620669724 |
| 1455548_at   | 0.016620256  | 7.885918116 | 0.152214372  | 0.882233679 | 0.882233679 | -5.620677643 |
| 1431397_at   | -0.012901875 | 3.742720756 | -0.152177062 | 0.8822623   | 0.8822623   | -5.62068312  |
| 1423994_at   | 0.011911824  | 8.946344269 | 0.152164682  | 0.882271797 | 0.882271797 | -5.620684938 |
| 1423449_a_at | -0.013890511 | 11.07702332 | -0.152148271 | 0.882284386 | 0.882284386 | -5.620687346 |
| 1437861_s_at | 0.017940897  | 6.193356492 | 0.152135701  | 0.882294028 | 0.882294028 | -5.620689191 |
| 1419346_a_at | 0.012101721  | 4.53904633  | 0.152121334  | 0.88230505  | 0.88230505  | -5.620691299 |
| 1416502_a_at | 0.010100127  | 9.540108971 | 0.152084071  | 0.882333635 | 0.882333635 | -5.620696766 |
| 1433851_at   | 0.011563511  | 7.400293183 | 0.152002275  | 0.882396383 | 0.882396383 | -5.620708761 |
| 1428161_a_at | 0.011000775  | 12.96070951 | 0.151965545  | 0.88242456  | 0.88242456  | -5.620714146 |
| 1421102_a_at | 0.01203587   | 8.725861761 | 0.151951053  | 0.882435678 | 0.882435678 | -5.62071627  |
| 1417677_at   | -0.010384324 | 7.15197349  | -0.151948881 | 0.882437344 | 0.882437344 | -5.620716588 |
| 1450337_a_at | 0.011435787  | 5.772465591 | 0.151943375  | 0.882441568 | 0.882441568 | -5.620717395 |
| 1415976_a_at | -0.0123565   | 8.229806763 | -0.151929665 | 0.882452085 | 0.882452085 | -5.620719404 |
| 1426135_a_at | 0.011934661  | 3.959596281 | 0.151859867  | 0.882505631 | 0.882505631 | -5.620729631 |
| 1420580_at   | 0.01145207   | 3.844028809 | 0.151837446  | 0.882522831 | 0.882522831 | -5.620732914 |
| 1417194_at   | -0.010335576 | 4.696393837 | -0.151824964 | 0.882532407 | 0.882532407 | -5.620734742 |
| 1449806_at   | 0.011904404  | 3.707487551 | 0.151809204  | 0.882544497 | 0.882544497 | -5.62073705  |
| 1424016_at   | -0.01013549  | 7.274120261 | -0.151741828 | 0.882596186 | 0.882596186 | -5.620746914 |
| 1447893_x_at | -0.011874109 | 3.401549078 | -0.151738183 | 0.882598982 | 0.882598982 | -5.620747447 |
| 1451589_at   | 0.011712068  | 7.85837284  | 0.151705473  | 0.882624076 | 0.882624076 | -5.620752234 |
| 1435176_a_at | -0.020297921 | 10.28327449 | -0.151686901 | 0.882638324 | 0.882638324 | -5.620754952 |
| 1430186_at   | 0.057110471  | 3.521909287 | 0.151672691  | 0.882649226 | 0.882649226 | -5.620757031 |
| 1418121_at   | -0.009201713 | 9.053024609 | -0.151621422 | 0.882688558 | 0.882688558 | -5.62076453  |
| 1446013_at   | -0.00948686  | 5.032596881 | -0.151618077 | 0.882691125 | 0.882691125 | -5.620765019 |
| 1423655_a_at | 0.016558688  | 8.148745459 | 0.151584152  | 0.882717151 | 0.882717151 | -5.62076998  |
| 1422137_at   | 0.013429184  | 3.856820306 | 0.151554113  | 0.882740197 | 0.882740197 | -5.620774372 |
| 1452721_a_at | -0.011327766 | 8.993376808 | -0.151528443 | 0.882759891 | 0.882759891 | -5.620778124 |
| 1427128_at   | -0.016428054 | 7.766389065 | -0.151525917 | 0.882761829 | 0.882761829 | -5.620778493 |
| 1448051_at   | 0.010851669  | 3.600526859 | 0.151518972  | 0.882767157 | 0.882767157 | -5.620779508 |
| 1420891_at   | 0.016060056  | 5.379972502 | 0.151476708  | 0.882799583 | 0.882799583 | -5.620785684 |
| 1436518_at   | 0.010425141  | 9.850308885 | 0.151466765  | 0.88280721  | 0.88280721  | -5.620787137 |
| 1417941_at   | 0.011059542  | 9.100490012 | 0.151388054  | 0.882867598 | 0.882867598 | -5.620798634 |
| 1423808_at   | -0.009871363 | 6.753477975 | -0.151277638 | 0.882952312 | 0.882952312 | -5.620814751 |
| 1416525_at   | -0.00928706  | 9.488222203 | -0.15127675  | 0.882952993 | 0.882952993 | -5.620814881 |
| 1449915_at   | 0.012394234  | 7.098247234 | 0.151229632  | 0.882989144 | 0.882989144 | -5.620821755 |
| 1457845_at   | -0.021061351 | 6.142443432 | -0.151223625 | 0.882993752 | 0.882993752 | -5.620822631 |
| 1456956_at   | 0.021972821  | 7.80452398  | 0.151219604  | 0.882996838 | 0.882996838 | -5.620823218 |
| 1427174_at   | 0.029347528  | 8.284042374 | 0.151218409  | 0.882997754 | 0.882997754 | -5.620823392 |
| 1442208_at   | -0.017172068 | 4.513110573 | -0.151178002 | 0.883028757 | 0.883028757 | -5.620829285 |
| 1439875_at   | -0.011150075 | 6.781718603 | -0.151176918 | 0.883029588 | 0.883029588 | -5.620829443 |
| 1450768_at   | -0.009971169 | 9.214044153 | -0.151126186 | 0.883068512 | 0.883068512 | -5.62083684  |

|              |              |             |              |             |             |              |
|--------------|--------------|-------------|--------------|-------------|-------------|--------------|
| 1432765_at   | 0.015136308  | 3.533650267 | 0.151073179  | 0.883109182 | 0.883109182 | -5.620844566 |
| 1440247_at   | -0.014202629 | 5.951857904 | -0.150972785 | 0.88318621  | 0.88318621  | -5.62085919  |
| 1416353_at   | -0.011926037 | 8.048346615 | -0.150969106 | 0.883189033 | 0.883189033 | -5.620859726 |
| 1444059_at   | -0.014917063 | 3.948783055 | -0.150965634 | 0.883191697 | 0.883191697 | -5.620860232 |
| 1428679_s_at | 0.01117336   | 7.590821219 | 0.150956544  | 0.883198672 | 0.883198672 | -5.620861555 |
| 1429077_x_at | -0.011536403 | 12.93182086 | -0.150949652 | 0.883203959 | 0.883203959 | -5.620862559 |
| 1453212_at   | 0.00953649   | 8.578839996 | 0.15093894   | 0.883212178 | 0.883212178 | -5.620864119 |
| 1438250_s_at | 0.01664723   | 10.39358719 | 0.150921897  | 0.883225255 | 0.883225255 | -5.6208666   |
| 1442952_at   | -0.012711466 | 4.08629099  | -0.150888656 | 0.88325076  | 0.88325076  | -5.620871438 |
| 1417669_at   | -0.011428915 | 9.021211333 | -0.150857473 | 0.883274686 | 0.883274686 | -5.620875976 |
| 1425867_at   | -0.009572586 | 5.332640618 | -0.150847699 | 0.883282186 | 0.883282186 | -5.620877399 |
| 1446407_at   | 0.021364471  | 7.133844235 | 0.150777949  | 0.883335704 | 0.883335704 | -5.620887545 |
| 1425103_at   | -0.009820307 | 5.158804025 | -0.150777614 | 0.883335961 | 0.883335961 | -5.620887594 |
| 1438629_x_at | -0.015710673 | 10.92468305 | -0.150754366 | 0.883353799 | 0.883353799 | -5.620890975 |
| 1447618_at   | 0.009898183  | 3.126556089 | 0.150735739  | 0.883368091 | 0.883368091 | -5.620893684 |
| 1459241_at   | 0.018987154  | 4.854047559 | 0.150712637  | 0.883385818 | 0.883385818 | -5.620897042 |
| 1447024_at   | -0.009682995 | 6.26775909  | -0.150682849 | 0.883408674 | 0.883408674 | -5.620901372 |
| 1454421_at   | -0.010382824 | 3.489295228 | -0.15059152  | 0.883478752 | 0.883478752 | -5.620914643 |
| 1428436_at   | 0.010821025  | 9.625363348 | 0.150522032  | 0.883532071 | 0.883532071 | -5.620924734 |
| 1422840_at   | 0.010653649  | 3.244593452 | 0.150450981  | 0.883586591 | 0.883586591 | -5.620935048 |
| 1440067_at   | -0.019115667 | 6.888053972 | -0.15042439  | 0.883606996 | 0.883606996 | -5.620938907 |
| 1428721_at   | 0.011679886  | 8.53707953  | 0.150415915  | 0.883613498 | 0.883613498 | -5.620940137 |
| 1416536_at   | -0.011033696 | 9.042156958 | -0.150398228 | 0.883627071 | 0.883627071 | -5.620942703 |
| 1456236_s_at | 0.009330871  | 7.927155675 | 0.1503341    | 0.883676279 | 0.883676279 | -5.620952004 |
| 1445037_at   | 0.01393838   | 7.221307048 | 0.150268445  | 0.88372666  | 0.88372666  | -5.620961523 |
| 1459112_at   | 0.010363479  | 4.115050862 | 0.150244868  | 0.883744751 | 0.883744751 | -5.62096494  |
| 1424818_at   | 0.013637309  | 6.910940676 | 0.150237948  | 0.883750061 | 0.883750061 | -5.620965943 |
| 1442221_at   | 0.018346055  | 4.022356757 | 0.150224039  | 0.883760735 | 0.883760735 | -5.620967959 |
| 1458516_at   | 0.009517971  | 3.373262679 | 0.150199845  | 0.883779301 | 0.883779301 | -5.620971464 |
| 1449884_at   | -0.016050428 | 4.083262959 | -0.150146847 | 0.88381997  | 0.88381997  | -5.620979141 |
| 1422805_a_at | -0.009388904 | 8.485816715 | -0.150125445 | 0.883836393 | 0.883836393 | -5.620982241 |
| 1443843_x_at | -0.012326906 | 13.7855244  | -0.150103976 | 0.883852868 | 0.883852868 | -5.62098535  |
| 1441185_at   | -0.012340467 | 7.396253747 | -0.150088213 | 0.883864964 | 0.883864964 | -5.620987632 |
| 1446077_at   | 0.012980079  | 3.389393138 | 0.150060647  | 0.883886118 | 0.883886118 | -5.620991623 |
| 1427419_x_at | -0.010430391 | 3.700350271 | -0.150001546 | 0.883931471 | 0.883931471 | -5.621000176 |
| 1421770_a_at | 0.015345898  | 6.516504343 | 0.149986665  | 0.883942891 | 0.883942891 | -5.621002329 |
| 1424604_s_at | -0.012766031 | 7.547651083 | -0.149985365 | 0.883943888 | 0.883943888 | -5.621002517 |
| 1425718_a_at | 0.015081888  | 11.52564163 | 0.149956565  | 0.883965989 | 0.883965989 | -5.621006683 |
| 1450075_at   | -0.012483049 | 5.128610797 | -0.149920923 | 0.883993341 | 0.883993341 | -5.621011838 |
| 1435148_at   | -0.015121899 | 7.569241667 | -0.149879655 | 0.88402501  | 0.88402501  | -5.621017806 |
| 1450218_at   | 0.013782824  | 3.325661809 | 0.149829475  | 0.884063519 | 0.884063519 | -5.621025059 |
| 1430420_at   | 0.013860234  | 3.590366051 | 0.149800143  | 0.884086029 | 0.884086029 | -5.621029298 |
| 1439323_a_at | 0.011448611  | 5.587356331 | 0.149793355  | 0.884091238 | 0.884091238 | -5.621030279 |
| 1424678_at   | 0.015523827  | 6.536620792 | 0.149738935  | 0.884133001 | 0.884133001 | -5.621038141 |
| 1437800_at   | 0.015662504  | 6.109730341 | 0.14963382   | 0.88421367  | 0.88421367  | -5.621053319 |
| 1453535_at   | 0.013336656  | 3.27293612  | 0.149623175  | 0.884221839 | 0.884221839 | -5.621054855 |
| 1443429_at   | -0.014319778 | 6.040334987 | -0.149526382 | 0.884296122 | 0.884296122 | -5.621068821 |
| 1415885_at   | 0.021957463  | 6.648264144 | 0.14952634   | 0.884296155 | 0.884296155 | -5.621068827 |
| 1439162_at   | -0.013187657 | 3.760329281 | -0.149461623 | 0.884345823 | 0.884345823 | -5.62107816  |
| 1425387_at   | 0.00910698   | 3.602830492 | 0.149411093  | 0.884384602 | 0.884384602 | -5.621085444 |
| 1446048_at   | -0.010413331 | 10.50573393 | -0.149329299 | 0.884447377 | 0.884447377 | -5.62109723  |
| 1446443_at   | 0.0154213    | 6.814684932 | 0.149328769  | 0.884447784 | 0.884447784 | -5.621097306 |
| 1459869_x_at | -0.011348114 | 7.772492454 | -0.14930387  | 0.884466893 | 0.884466893 | -5.621100892 |

|              |              |             |              |             |             |              |
|--------------|--------------|-------------|--------------|-------------|-------------|--------------|
| 1437543_at   | -0.01125876  | 10.29895018 | -0.149279256 | 0.884485784 | 0.884485784 | -5.621104437 |
| 1440175_at   | 0.011949031  | 3.399655921 | 0.149260054  | 0.884500521 | 0.884500521 | -5.621107202 |
| 1454081_at   | -0.016804125 | 3.932379016 | -0.149257866 | 0.884502201 | 0.884502201 | -5.621107517 |
| 1444483_at   | -0.011211163 | 6.704788987 | -0.149250573 | 0.884507798 | 0.884507798 | -5.621108567 |
| 1415903_at   | -0.011901719 | 8.038590791 | -0.149238308 | 0.884517211 | 0.884517211 | -5.621110333 |
| 1421629_at   | 0.023021977  | 5.484208687 | 0.149172516  | 0.884567706 | 0.884567706 | -5.621119802 |
| 1449121_at   | 0.014123201  | 9.161568359 | 0.149136733  | 0.884595169 | 0.884595169 | -5.621124951 |
| 1423850_at   | -0.009777293 | 9.709177764 | -0.149112671 | 0.884613637 | 0.884613637 | -5.621128412 |
| 1418520_at   | 0.014715595  | 5.450423014 | 0.149060619  | 0.884653587 | 0.884653587 | -5.621135898 |
| 1460382_at   | -0.014797155 | 5.851770752 | -0.149039879 | 0.884669506 | 0.884669506 | -5.62113888  |
| 1420225_at   | 0.01031788   | 3.135074083 | 0.149015503  | 0.884688215 | 0.884688215 | -5.621142384 |
| 1438115_a_at | 0.012473793  | 8.146135014 | 0.14895648   | 0.884733516 | 0.884733516 | -5.621150867 |
| 1455581_x_at | -0.021836464 | 6.805915512 | -0.148954856 | 0.884734762 | 0.884734762 | -5.621151101 |
| 1432816_s_at | 0.009955038  | 4.252767367 | 0.148947506  | 0.884740404 | 0.884740404 | -5.621152157 |
| 1433478_at   | 0.012073291  | 9.355379927 | 0.148913441  | 0.884766549 | 0.884766549 | -5.621157051 |
| 1423331_a_at | 0.023225166  | 9.599148972 | 0.148913025  | 0.884766868 | 0.884766868 | -5.62115711  |
| 1422475_a_at | 0.009154111  | 13.84367602 | 0.148885169  | 0.884788249 | 0.884788249 | -5.621161111 |
| 1455787_x_at | 0.034167626  | 6.658774991 | 0.14887282   | 0.884797727 | 0.884797727 | -5.621162885 |
| 1451669_at   | 0.01062664   | 9.594107936 | 0.14882135   | 0.884837232 | 0.884837232 | -5.621170275 |
| 1426998_at   | 0.019662198  | 8.710472203 | 0.148742527  | 0.884897733 | 0.884897733 | -5.621181588 |
| 1420646_at   | -0.00999746  | 7.692265742 | -0.148693939 | 0.884935026 | 0.884935026 | -5.621188559 |
| 1443896_at   | 0.010238127  | 8.045789175 | 0.148680578  | 0.884945282 | 0.884945282 | -5.621190475 |
| 1418377_a_at | 0.00982325   | 10.05257871 | 0.14867922   | 0.884946325 | 0.884946325 | -5.62119067  |
| 1457248_x_at | -0.018177631 | 8.147162337 | -0.148628224 | 0.884985467 | 0.884985467 | -5.621197983 |
| 1420806_at   | -0.01359167  | 4.013487981 | -0.148619819 | 0.884991918 | 0.884991918 | -5.621199188 |
| 1452354_at   | 0.013970261  | 4.067551091 | 0.148616257  | 0.884994652 | 0.884994652 | -5.621199699 |
| 1425443_at   | -0.015183428 | 4.054215533 | -0.148597618 | 0.885008959 | 0.885008959 | -5.621202371 |
| 1434394_at   | -0.013543889 | 10.19505186 | -0.14859002  | 0.885014791 | 0.885014791 | -5.62120346  |
| 1455555_at   | 0.009906467  | 3.776099988 | 0.148548683  | 0.88504652  | 0.88504652  | -5.621209384 |
| 1423615_at   | 0.009383099  | 8.581696337 | 0.148469094  | 0.885107611 | 0.885107611 | -5.621220787 |
| 1431972_a_at | 0.009702774  | 6.728852435 | 0.148444665  | 0.885126363 | 0.885126363 | -5.621224285 |
| 1417015_at   | -0.028648979 | 5.028956051 | -0.148417566 | 0.885147164 | 0.885147164 | -5.621228165 |
| 1438720_at   | 0.010232566  | 3.838928257 | 0.14830761   | 0.885231566 | 0.885231566 | -5.621243902 |
| 1459509_at   | -0.016093992 | 5.31328312  | -0.148307434 | 0.885231701 | 0.885231701 | -5.621243928 |
| 1421872_at   | 0.012061306  | 9.25294389  | 0.148277925  | 0.885254352 | 0.885254352 | -5.621248149 |
| 1453260_a_at | 0.013039628  | 9.187373421 | 0.148267463  | 0.885262383 | 0.885262383 | -5.621249645 |
| 1457688_at   | -0.020702272 | 5.269642655 | -0.148250865 | 0.885275124 | 0.885275124 | -5.621252019 |
| 1426564_at   | -0.012395564 | 6.859262896 | -0.148226625 | 0.885293731 | 0.885293731 | -5.621255486 |
| 1454253_at   | 0.010860287  | 5.811628879 | 0.148183592  | 0.885326764 | 0.885326764 | -5.621261638 |
| 1422320_x_at | 0.016083131  | 7.453549732 | 0.148155062  | 0.885348664 | 0.885348664 | -5.621265716 |
| 1443501_at   | 0.009875129  | 3.156982617 | 0.148143343  | 0.88535766  | 0.88535766  | -5.621267391 |
| 1436453_at   | 0.010632918  | 3.266584872 | 0.148137279  | 0.885362315 | 0.885362315 | -5.621268258 |
| 1419414_at   | -0.013005041 | 4.407803709 | -0.148129155 | 0.885368551 | 0.885368551 | -5.621269419 |
| 1419364_a_at | 0.008825109  | 13.6564305  | 0.148117446  | 0.885377539 | 0.885377539 | -5.621271092 |
| 1419546_at   | -0.012655868 | 8.042272754 | -0.148067101 | 0.885416186 | 0.885416186 | -5.621278284 |
| 1451374_x_at | -0.012947014 | 6.871357072 | -0.148058486 | 0.885422799 | 0.885422799 | -5.621279515 |
| 1453458_at   | -0.013836776 | 7.052361653 | -0.148027217 | 0.885446802 | 0.885446802 | -5.62128398  |
| 1435055_a_at | -0.010249448 | 8.857009535 | -0.147986975 | 0.885477693 | 0.885477693 | -5.621289726 |
| 1417505_s_at | 0.010694074  | 10.97977446 | 0.147873468  | 0.885564828 | 0.885564828 | -5.621305924 |
| 1421481_at   | -0.015154928 | 3.865324261 | -0.147865998 | 0.885570562 | 0.885570562 | -5.62130699  |
| 1454409_at   | -0.012873916 | 3.278963068 | -0.147829422 | 0.88559864  | 0.88559864  | -5.621312207 |
| 1449057_at   | -0.016654312 | 4.009408282 | -0.147819335 | 0.885606384 | 0.885606384 | -5.621313645 |
| 1447267_at   | -0.012957469 | 3.882796392 | -0.147781028 | 0.88563579  | 0.88563579  | -5.621319107 |

|              |              |             |              |             |             |              |
|--------------|--------------|-------------|--------------|-------------|-------------|--------------|
| 1455999_at   | -0.008891033 | 5.049494332 | -0.147775317 | 0.885640175 | 0.885640175 | -5.621319921 |
| 1430630_at   | 0.017240385  | 4.062213006 | 0.147771017  | 0.885643476 | 0.885643476 | -5.621320534 |
| 1452888_at   | -0.012014046 | 6.266937307 | -0.147767447 | 0.885646217 | 0.885646217 | -5.621321043 |
| 1448055_at   | 0.014189694  | 4.739320783 | 0.14776465   | 0.885648364 | 0.885648364 | -5.621321442 |
| 1451262_a_at | -0.009848414 | 9.066680156 | -0.147754754 | 0.88565596  | 0.88565596  | -5.621322852 |
| 1430977_at   | -0.011550021 | 6.003787478 | -0.147754005 | 0.885656535 | 0.885656535 | -5.621322959 |
| 1442986_at   | 0.016967433  | 5.661262039 | 0.147747188  | 0.885661769 | 0.885661769 | -5.621323931 |
| 1437342_x_at | 0.017481511  | 9.09029744  | 0.147717383  | 0.88568465  | 0.88568465  | -5.621328179 |
| 1456974_at   | 0.018096912  | 3.675003495 | 0.147682804  | 0.885711195 | 0.885711195 | -5.621333106 |
| 1416495_s_at | 0.010637012  | 10.13147138 | 0.147661628  | 0.885727452 | 0.885727452 | -5.621336122 |
| 1417912_at   | -0.011070904 | 9.140994238 | -0.147655042 | 0.885732508 | 0.885732508 | -5.62133706  |
| 1424173_at   | 0.011715534  | 7.113706506 | 0.147627747  | 0.885753461 | 0.885753461 | -5.621340948 |
| 1451466_at   | 0.011706736  | 9.036883526 | 0.147623664  | 0.885756596 | 0.885756596 | -5.621341529 |
| 1427338_at   | -0.016260661 | 6.858270848 | -0.147613398 | 0.885764477 | 0.885764477 | -5.621342991 |
| 1437814_at   | -0.013161757 | 3.99132858  | -0.147549452 | 0.885813569 | 0.885813569 | -5.621352096 |
| 1452506_a_at | -0.01674676  | 9.333937419 | -0.147506596 | 0.88584647  | 0.88584647  | -5.621358195 |
| 1435800_a_at | 0.013759898  | 10.76466809 | 0.147493116  | 0.885856818 | 0.885856818 | -5.621360113 |
| 1430440_at   | 0.011836203  | 4.333375001 | 0.147419666  | 0.885913206 | 0.885913206 | -5.621370561 |
| 1460332_at   | 0.016225956  | 3.349945296 | 0.1473294    | 0.885982506 | 0.885982506 | -5.621383395 |
| 1450824_at   | -0.016952751 | 6.40781715  | -0.147244926 | 0.886047359 | 0.886047359 | -5.621395398 |
| 1448920_at   | 0.011301339  | 4.358512911 | 0.147171563  | 0.886103684 | 0.886103684 | -5.621405816 |
| 1418895_at   | -0.016231627 | 7.305275925 | -0.147125319 | 0.886139187 | 0.886139187 | -5.621412381 |
| 1421852_at   | 0.013062629  | 5.528843022 | 0.147121201  | 0.886142349 | 0.886142349 | -5.621412965 |
| 1426137_at   | 0.010352648  | 4.001719546 | 0.147030486  | 0.886211996 | 0.886211996 | -5.621425837 |
| 1437157_at   | 0.009686434  | 5.308928656 | 0.147012424  | 0.886225864 | 0.886225864 | -5.621428399 |
| 1425179_at   | -0.010590953 | 7.794464057 | -0.147002824 | 0.886233234 | 0.886233234 | -5.62142976  |
| 1417064_at   | 0.011524265  | 9.453039952 | 0.146976639  | 0.886253338 | 0.886253338 | -5.621433473 |
| 1443697_at   | 0.044933539  | 4.29254326  | 0.146886926  | 0.886322218 | 0.886322218 | -5.62144619  |
| 1420359_at   | -0.012277607 | 3.7093812   | -0.14682892  | 0.886366754 | 0.886366754 | -5.621454408 |
| 1430840_at   | -0.010246219 | 3.859265805 | -0.146817004 | 0.886375903 | 0.886375903 | -5.621456096 |
| 1453339_at   | -0.01014061  | 3.660357241 | -0.146810082 | 0.886381218 | 0.886381218 | -5.621457076 |
| 1454359_at   | -0.012847416 | 3.52892102  | -0.146799488 | 0.886389352 | 0.886389352 | -5.621458577 |
| 1457528_at   | -0.014421906 | 8.432459303 | -0.146794871 | 0.886392896 | 0.886392896 | -5.621459231 |
| 1436697_at   | 0.014707381  | 6.53552229  | 0.14668608   | 0.886476427 | 0.886476427 | -5.621474632 |
| 1419148_at   | -0.011793546 | 5.554269558 | -0.146682693 | 0.886479027 | 0.886479027 | -5.621475111 |
| 1452771_s_at | 0.009583617  | 9.007993663 | 0.146681197  | 0.886480176 | 0.886480176 | -5.621475323 |
| 1419065_at   | -0.014034228 | 3.760065406 | -0.146648096 | 0.886505591 | 0.886505591 | -5.621480006 |
| 1433585_at   | 0.011860674  | 10.12338119 | 0.146643303  | 0.886509271 | 0.886509271 | -5.621480684 |
| 1454431_at   | 0.01213921   | 3.73249593  | 0.146510552  | 0.8866112   | 0.8866112   | -5.621499456 |
| 1434844_at   | 0.012578337  | 7.000454813 | 0.1464817    | 0.886633354 | 0.886633354 | -5.621503534 |
| 1446120_at   | -0.011737081 | 3.898246803 | -0.146464138 | 0.886646839 | 0.886646839 | -5.621506016 |
| 1447312_at   | -0.021156446 | 8.121369945 | -0.146454108 | 0.88665454  | 0.88665454  | -5.621507433 |
| 1458994_at   | 0.018281694  | 7.644037505 | 0.146445822  | 0.886660902 | 0.886660902 | -5.621508603 |
| 1445963_at   | 0.017073035  | 5.372657775 | 0.14642313   | 0.886678326 | 0.886678326 | -5.621511809 |
| 1436234_at   | 0.011762668  | 7.814018565 | 0.146420497  | 0.886680348 | 0.886680348 | -5.621512181 |
| 1457384_at   | 0.014600167  | 5.575902896 | 0.146415062  | 0.886684521 | 0.886684521 | -5.621512949 |
| 1428032_at   | -0.009761777 | 4.312504265 | -0.146373487 | 0.886716444 | 0.886716444 | -5.621518821 |
| 1431922_at   | -0.017983947 | 4.898443529 | -0.146193859 | 0.886854374 | 0.886854374 | -5.621544171 |
| 1418790_at   | 0.011396845  | 4.274562338 | 0.146133877  | 0.886900432 | 0.886900432 | -5.621552629 |
| 1432010_at   | -0.010331526 | 3.799919888 | -0.146125548 | 0.886906828 | 0.886906828 | -5.621553803 |
| 1460036_at   | -0.011180566 | 7.585815213 | -0.146123387 | 0.886908487 | 0.886908487 | -5.621554108 |
| 1423448_at   | -0.01061575  | 9.786134612 | -0.146098233 | 0.886927803 | 0.886927803 | -5.621557654 |
| 1423496_a_at | -0.016405539 | 4.626075454 | -0.146085649 | 0.886937465 | 0.886937465 | -5.621559427 |

|              |              |             |              |             |             |              |
|--------------|--------------|-------------|--------------|-------------|-------------|--------------|
| 1433321_at   | 0.011271119  | 5.766572801 | 0.146085352  | 0.886937693 | 0.886937693 | -5.621559469 |
| 1441040_at   | 0.014184063  | 3.854639488 | 0.146048053  | 0.886966335 | 0.886966335 | -5.621564725 |
| 1425877_at   | -0.01461427  | 4.762079419 | -0.146045456 | 0.886968329 | 0.886968329 | -5.621565091 |
| 1434704_at   | 0.013934523  | 10.12139113 | 0.146021315  | 0.886986866 | 0.886986866 | -5.621568492 |
| 1454576_at   | -0.009337116 | 4.33887604  | -0.146016024 | 0.88699093  | 0.88699093  | -5.621569238 |
| 1422304_at   | -0.013695447 | 3.556684745 | -0.145942983 | 0.887047017 | 0.887047017 | -5.621579524 |
| 1445700_at   | 0.012049372  | 3.358543221 | 0.145936811  | 0.887051757 | 0.887051757 | -5.621580393 |
| 1458932_at   | 0.011355708  | 5.418906636 | 0.145899427  | 0.887080464 | 0.887080464 | -5.621585656 |
| 1445307_at   | 0.021516493  | 9.19619172  | 0.145858612  | 0.887111806 | 0.887111806 | -5.6215914   |
| 1419812_s_at | -0.011945934 | 10.64179946 | -0.145829757 | 0.887133964 | 0.887133964 | -5.62159546  |
| 1450430_at   | 0.023672684  | 9.094556275 | 0.145829299  | 0.887134316 | 0.887134316 | -5.621595525 |
| 1431484_at   | -0.010408723 | 6.040400518 | -0.145817125 | 0.887143665 | 0.887143665 | -5.621597238 |
| 1439477_at   | 0.024537777  | 8.348395004 | 0.145799561  | 0.887157152 | 0.887157152 | -5.621599708 |
| 1420682_at   | 0.029414702  | 5.481186413 | 0.145774587  | 0.887176331 | 0.887176331 | -5.621603221 |
| 1450828_at   | 0.019705252  | 5.433772265 | 0.145750206  | 0.887195053 | 0.887195053 | -5.62160665  |
| 1456840_at   | 0.013857812  | 6.701533118 | 0.145734376  | 0.88720721  | 0.88720721  | -5.621608875 |
| 1429944_at   | 0.010547943  | 3.356680377 | 0.145725862  | 0.887213747 | 0.887213747 | -5.621610072 |
| 1440477_at   | 0.01256161   | 4.131020102 | 0.145722117  | 0.887216624 | 0.887216624 | -5.621610599 |
| 1436559_a_at | -0.013814863 | 8.148864542 | -0.145716293 | 0.887221096 | 0.887221096 | -5.621611418 |
| 1434654_at   | -0.010270788 | 9.438155485 | -0.145663892 | 0.887261336 | 0.887261336 | -5.621618783 |
| 1454059_at   | 0.011549871  | 4.184742533 | 0.145629458  | 0.887287779 | 0.887287779 | -5.621623621 |
| 1457594_at   | -0.011990901 | 4.545339484 | -0.14562381  | 0.887292117 | 0.887292117 | -5.621624415 |
| 1458072_at   | 0.010371705  | 3.268357122 | 0.145542927  | 0.887354231 | 0.887354231 | -5.621635775 |
| 1434902_at   | -0.014463788 | 5.918974682 | -0.145540152 | 0.887356361 | 0.887356361 | -5.621636165 |
| 1453711_at   | 0.009554948  | 4.062821765 | 0.145538138  | 0.887357908 | 0.887357908 | -5.621636448 |
| 1418731_at   | 0.013547553  | 4.165754474 | 0.145529443  | 0.887364586 | 0.887364586 | -5.621637669 |
| 1440410_at   | 0.012713089  | 3.455049172 | 0.145526188  | 0.887367086 | 0.887367086 | -5.621638126 |
| 1422074_at   | -0.011796291 | 4.352622117 | -0.145522548 | 0.887369881 | 0.887369881 | -5.621638637 |
| 1449922_at   | 0.010459271  | 3.546113598 | 0.145514642  | 0.887375952 | 0.887375952 | -5.621639747 |
| 1430469_at   | 0.010626959  | 4.445684412 | 0.145496788  | 0.887389663 | 0.887389663 | -5.621642253 |
| 1431337_a_at | 0.014273268  | 8.738070511 | 0.145397069  | 0.887466243 | 0.887466243 | -5.621656246 |
| 1434303_at   | -0.010046522 | 9.809305831 | -0.145365321 | 0.887490625 | 0.887490625 | -5.621660699 |
| 1426531_at   | 0.009690052  | 10.6053227  | 0.145362645  | 0.887492681 | 0.887492681 | -5.621661074 |
| 1432499_a_at | -0.01182428  | 8.778701893 | -0.145358182 | 0.887496107 | 0.887496107 | -5.6216617   |
| 1451703_s_at | 0.009607677  | 10.83189842 | 0.145292703  | 0.887546394 | 0.887546394 | -5.621670881 |
| 1446580_at   | 0.010833424  | 6.035807432 | 0.145280001  | 0.887556149 | 0.887556149 | -5.621672661 |
| 1416363_at   | 0.009207733  | 7.061228175 | 0.145278627  | 0.887557204 | 0.887557204 | -5.621672854 |
| 1432169_at   | -0.011677226 | 3.233454192 | -0.145256582 | 0.887574135 | 0.887574135 | -5.621675943 |
| 1424693_at   | -0.009253152 | 7.737980812 | -0.14522869  | 0.887595555 | 0.887595555 | -5.621679852 |
| 1456373_x_at | 0.012849002  | 13.14233529 | 0.145154987  | 0.887652158 | 0.887652158 | -5.621690176 |
| 1457371_at   | 0.018509175  | 5.711541259 | 0.145143192  | 0.887661217 | 0.887661217 | -5.621691828 |
| 1417536_at   | -0.012310164 | 9.197763656 | -0.145119848 | 0.887679145 | 0.887679145 | -5.621695096 |
| 1420758_at   | -0.009684774 | 4.2859956   | -0.14506928  | 0.887717982 | 0.887717982 | -5.621702175 |
| 1419731_at   | -0.012553007 | 3.887846536 | -0.145053771 | 0.887729893 | 0.887729893 | -5.621704346 |
| 1433875_at   | 0.010360072  | 8.935259852 | 0.145051264  | 0.887731818 | 0.887731818 | -5.621704697 |
| 1427159_at   | -0.009457868 | 8.569012215 | -0.144991151 | 0.887777986 | 0.887777986 | -5.621713107 |
| 1428732_at   | -0.011681845 | 6.218965161 | -0.144964204 | 0.887798682 | 0.887798682 | -5.621716876 |
| 1428197_at   | 0.010006738  | 10.14480988 | 0.144948269  | 0.88781092  | 0.88781092  | -5.621719105 |
| 1444779_s_at | -0.012573256 | 7.005821202 | -0.144871207 | 0.887870106 | 0.887870106 | -5.621729879 |
| 1448873_at   | 0.018989847  | 6.058038715 | 0.144834284  | 0.887898464 | 0.887898464 | -5.621735039 |
| 1455526_at   | -0.011916678 | 5.826388889 | -0.144832535 | 0.887899807 | 0.887899807 | -5.621735283 |
| 1458570_at   | -0.011740899 | 4.967766148 | -0.144820154 | 0.887909317 | 0.887909317 | -5.621737013 |
| 1431566_at   | 0.012489315  | 5.480610614 | 0.144804245  | 0.887921535 | 0.887921535 | -5.621739236 |

|              |              |             |              |             |             |              |
|--------------|--------------|-------------|--------------|-------------|-------------|--------------|
| 1449503_at   | -0.008944658 | 7.482828873 | -0.144764709 | 0.8879519   | 0.8879519   | -5.621744759 |
| 1448148_at   | 0.012299801  | 9.315572824 | 0.144758973  | 0.887956306 | 0.887956306 | -5.62174556  |
| 1439465_x_at | -0.013832918 | 8.752228279 | -0.144722304 | 0.88798447  | 0.88798447  | -5.621750681 |
| 1424882_a_at | -0.014566063 | 10.13598393 | -0.144706389 | 0.887996693 | 0.887996693 | -5.621752903 |
| 1448181_at   | -0.013421382 | 5.884905358 | -0.144700463 | 0.888001244 | 0.888001244 | -5.62175373  |
| 1457834_at   | -0.014228298 | 6.776802999 | -0.14468982  | 0.888009419 | 0.888009419 | -5.621755216 |
| 1428073_a_at | -0.010657769 | 9.738524472 | -0.144676638 | 0.888019544 | 0.888019544 | -5.621757056 |
| 1436871_at   | 0.01026527   | 8.656007897 | 0.144649536  | 0.88804036  | 0.88804036  | -5.621760838 |
| 1437195_x_at | -0.033743899 | 4.058022746 | -0.144636899 | 0.888050066 | 0.888050066 | -5.621762602 |
| 1458302_at   | 0.01156321   | 4.742935246 | 0.144544322  | 0.888121171 | 0.888121171 | -5.621775517 |
| 1447114_x_at | -0.01083106  | 5.533209272 | -0.144467066 | 0.888180509 | 0.888180509 | -5.621786288 |
| 1438406_at   | -0.020926523 | 7.975715229 | -0.144443494 | 0.888198615 | 0.888198615 | -5.621789573 |
| 1440944_at   | 0.013226527  | 3.219439885 | 0.144397502  | 0.888233941 | 0.888233941 | -5.621795981 |
| 1445493_at   | 0.012035261  | 5.262461863 | 0.144390758  | 0.888239121 | 0.888239121 | -5.621796921 |
| 1447810_x_at | -0.021110114 | 5.235674813 | -0.144388523 | 0.888240838 | 0.888240838 | -5.621797232 |
| 1436668_at   | 0.012609015  | 5.80782761  | 0.144352231  | 0.888268713 | 0.888268713 | -5.621802287 |
| 1444110_at   | -0.009893247 | 4.726202211 | -0.144339398 | 0.88827857  | 0.88827857  | -5.621804075 |
| 1424632_a_at | -0.011254282 | 10.68620235 | -0.144326258 | 0.888288663 | 0.888288663 | -5.621805904 |
| 1435844_at   | 0.009066513  | 6.319586031 | 0.144320116  | 0.88829338  | 0.88829338  | -5.62180676  |
| 1421757_at   | 0.011509627  | 3.952111898 | 0.144302122  | 0.888307202 | 0.888307202 | -5.621809265 |
| 1449878_a_at | -0.01281262  | 8.212850515 | -0.144263117 | 0.888337162 | 0.888337162 | -5.621814695 |
| 1439433_a_at | -0.015054784 | 7.515047749 | -0.144163695 | 0.888413529 | 0.888413529 | -5.621828528 |
| 1436382_at   | -0.012041602 | 8.343358655 | -0.144163079 | 0.888414002 | 0.888414002 | -5.621828614 |
| 1420156_at   | -0.013992745 | 3.803982951 | -0.144162341 | 0.888414569 | 0.888414569 | -5.621828716 |
| 1425593_at   | -0.01173585  | 7.567125086 | -0.144085807 | 0.888473357 | 0.888473357 | -5.621839359 |
| 1460055_at   | -0.016451389 | 4.109478997 | -0.144072523 | 0.88848356  | 0.88848356  | -5.621841205 |
| 1459380_at   | 0.016593091  | 6.812596909 | 0.144064462  | 0.888489753 | 0.888489753 | -5.621842326 |
| 1433433_at   | 0.00963386   | 8.760793674 | 0.144045686  | 0.888504175 | 0.888504175 | -5.621844936 |
| 1423438_at   | -0.012266116 | 7.827749065 | -0.144013466 | 0.888528925 | 0.888528925 | -5.621849413 |
| 1456688_at   | 0.017573162  | 6.037680249 | 0.144010091  | 0.888531517 | 0.888531517 | -5.621849882 |
| 1417730_at   | -0.013489109 | 9.717740734 | -0.144002918 | 0.888537026 | 0.888537026 | -5.621850878 |
| 1423209_at   | 0.015893617  | 6.907393288 | 0.144000568  | 0.888538832 | 0.888538832 | -5.621851205 |
| 1417902_at   | -0.011836029 | 8.332713595 | -0.143975517 | 0.888558075 | 0.888558075 | -5.621854685 |
| 1444033_at   | -0.015427732 | 5.983105458 | -0.143964172 | 0.888566789 | 0.888566789 | -5.621856261 |
| 1436878_at   | -0.014393854 | 6.312341651 | -0.143959096 | 0.888570689 | 0.888570689 | -5.621856966 |
| 1451334_at   | 0.011473666  | 8.026736892 | 0.143955225  | 0.888573662 | 0.888573662 | -5.621857504 |
| 1459318_at   | 0.019086331  | 5.82164646  | 0.143932242  | 0.888591316 | 0.888591316 | -5.621860696 |
| 1423630_at   | 0.016832973  | 6.551977924 | 0.143930136  | 0.888592934 | 0.888592934 | -5.621860988 |
| 1434481_at   | 0.014003154  | 8.321249096 | 0.14390715   | 0.88861059  | 0.88861059  | -5.62186418  |
| 1423465_at   | 0.015604853  | 7.64615682  | 0.143906815  | 0.888610848 | 0.888610848 | -5.621864226 |
| 1441378_at   | 0.011599537  | 4.27222979  | 0.143900621  | 0.888615606 | 0.888615606 | -5.621865086 |
| 1426821_at   | -0.013445956 | 7.731704894 | -0.143835041 | 0.888665981 | 0.888665981 | -5.621874189 |
| 1451229_at   | 0.017836776  | 7.380785419 | 0.143811587  | 0.888683998 | 0.888683998 | -5.621877444 |
| 1419887_at   | 0.012526612  | 3.547232744 | 0.143810137  | 0.888685112 | 0.888685112 | -5.621877645 |
| 1438372_at   | 0.018177152  | 3.870271224 | 0.14381007   | 0.888685163 | 0.888685163 | -5.621877654 |
| 1436460_at   | -0.011821579 | 6.47945616  | -0.143782217 | 0.888706559 | 0.888706559 | -5.621881519 |
| 1426329_s_at | -0.016675373 | 4.762000632 | -0.143693426 | 0.888774766 | 0.888774766 | -5.621893833 |
| 1428155_at   | -0.009916723 | 8.532381942 | -0.143687139 | 0.888779595 | 0.888779595 | -5.621894704 |
| 1429337_at   | -0.009862327 | 6.663103637 | -0.143662871 | 0.888798238 | 0.888798238 | -5.621898068 |
| 1455161_at   | -0.022032747 | 4.942844211 | -0.14365601  | 0.888803508 | 0.888803508 | -5.621899019 |
| 1426988_at   | 0.015839395  | 7.615927486 | 0.143631892  | 0.888822034 | 0.888822034 | -5.621902362 |
| 1438642_at   | 0.013149274  | 3.424210943 | 0.143626267  | 0.888826356 | 0.888826356 | -5.621903141 |
| 1453452_at   | -0.014973883 | 4.080442015 | -0.143575101 | 0.888865661 | 0.888865661 | -5.62191023  |



|              |              |             |              |             |             |              |
|--------------|--------------|-------------|--------------|-------------|-------------|--------------|
| 1428164_at   | 0.009988969  | 8.955252827 | 0.143568546  | 0.888870697 | 0.888870697 | -5.621911139 |
| 1460178_at   | -0.010910167 | 7.913809858 | -0.143481457 | 0.888937598 | 0.888937598 | -5.621923198 |
| 1442494_at   | -0.019915565 | 4.725352955 | -0.143478624 | 0.888939775 | 0.888939775 | -5.621923591 |
| 1426022_a_at | -0.021127417 | 6.784960627 | -0.143461842 | 0.888952667 | 0.888952667 | -5.621925914 |
| 1458634_at   | -0.014684737 | 4.345471808 | -0.143450731 | 0.888961202 | 0.888961202 | -5.621927452 |
| 1447309_at   | -0.011828914 | 3.918397986 | -0.143424702 | 0.888981198 | 0.888981198 | -5.621931054 |
| 1432512_at   | -0.012771415 | 3.146687126 | -0.14342458  | 0.888981291 | 0.888981291 | -5.621931071 |
| 1451722_s_at | 0.014223508  | 7.853792322 | 0.143407964  | 0.888994056 | 0.888994056 | -5.62193337  |
| 1433514_at   | 0.00976537   | 9.43418187  | 0.143355899  | 0.889034053 | 0.889034053 | -5.621940573 |
| 1447537_at   | -0.009319872 | 8.186850885 | -0.143313757 | 0.889066427 | 0.889066427 | -5.621946401 |
| 1425147_at   | -0.009888823 | 5.852550094 | -0.143281298 | 0.889091363 | 0.889091363 | -5.621950889 |
| 1435656_at   | -0.013496715 | 7.579883056 | -0.143242789 | 0.889120947 | 0.889120947 | -5.621956211 |
| 1436997_x_at | 0.01373137   | 11.15810011 | 0.143221239  | 0.889137502 | 0.889137502 | -5.62195919  |
| 1444051_at   | 0.013413511  | 4.569507274 | 0.14315633   | 0.889187368 | 0.889187368 | -5.621968157 |
| 1451086_s_at | 0.010689011  | 11.86231377 | 0.143112626  | 0.889220943 | 0.889220943 | -5.621974193 |
| 1443277_at   | 0.013529777  | 4.034625155 | 0.142990182  | 0.889315011 | 0.889315011 | -5.621991093 |
| 1455152_at   | 0.009647731  | 8.360943139 | 0.142948051  | 0.889347379 | 0.889347379 | -5.621996905 |
| 1442760_x_at | 0.018048174  | 8.351182738 | 0.142901174  | 0.889383394 | 0.889383394 | -5.622003369 |
| 1445950_at   | -0.008427257 | 4.39970629  | -0.142883238 | 0.889397173 | 0.889397173 | -5.622005842 |
| 1445708_x_at | 0.014027591  | 6.79185829  | 0.142863174  | 0.889412588 | 0.889412588 | -5.622008608 |
| 1429927_at   | -0.01630878  | 3.633558216 | -0.142836015 | 0.889433453 | 0.889433453 | -5.622012351 |
| 1454095_at   | -0.015049602 | 3.093914548 | -0.142831865 | 0.889436642 | 0.889436642 | -5.622012923 |
| 1415814_at   | -0.010462329 | 9.704154475 | -0.142829924 | 0.889438134 | 0.889438134 | -5.622013191 |
| 1448238_at   | 0.008880962  | 11.37913689 | 0.142753995  | 0.889496468 | 0.889496468 | -5.622023652 |
| 1438379_x_at | -0.013382317 | 3.250286067 | -0.142741886 | 0.889505772 | 0.889505772 | -5.62202532  |
| 1450577_at   | -0.012082409 | 4.469093443 | -0.142723067 | 0.88952023  | 0.88952023  | -5.622027911 |
| 1456731_x_at | 0.012007269  | 9.878898165 | 0.142670488  | 0.889560627 | 0.889560627 | -5.622035151 |
| 1431815_a_at | -0.011609264 | 7.110691247 | -0.142663642 | 0.889565886 | 0.889565886 | -5.622036093 |
| 1439938_at   | -0.019609811 | 6.164911231 | -0.14263978  | 0.88958422  | 0.88958422  | -5.622039377 |
| 1423041_a_at | -0.010726247 | 10.82029085 | -0.142615162 | 0.889603134 | 0.889603134 | -5.622042765 |
| 1438205_at   | 0.018252506  | 6.811230586 | 0.142603537  | 0.889612065 | 0.889612065 | -5.622044365 |
| 1433568_at   | 0.026399607  | 7.878672039 | 0.142587935  | 0.889624053 | 0.889624053 | -5.622046511 |
| 1439667_at   | 0.017885297  | 4.477272509 | 0.14258487   | 0.889626408 | 0.889626408 | -5.622046933 |
| 1443417_at   | -0.011089912 | 3.818738619 | -0.142558401 | 0.889646744 | 0.889646744 | -5.622050574 |
| 1447084_at   | -0.009677684 | 3.900732295 | -0.142552686 | 0.889651135 | 0.889651135 | -5.62205136  |
| 1433191_at   | -0.009702473 | 3.620527171 | -0.142485432 | 0.889702808 | 0.889702808 | -5.622060609 |
| 1448168_a_at | -0.00878816  | 3.332256206 | -0.142479763 | 0.889707163 | 0.889707163 | -5.622061388 |
| 1426308_at   | 0.016072024  | 3.68149757  | 0.142427288  | 0.889747481 | 0.889747481 | -5.622068601 |
| 1450845_a_at | 0.009857587  | 11.10602243 | 0.142418449  | 0.889754272 | 0.889754272 | -5.622069815 |
| 1431909_at   | -0.010103227 | 4.145463717 | -0.142404026 | 0.889765354 | 0.889765354 | -5.622071797 |
| 1418653_at   | 0.020222545  | 4.385510977 | 0.14229726   | 0.889847387 | 0.889847387 | -5.622086462 |
| 1440663_at   | 0.009542498  | 4.169277993 | 0.142288261  | 0.889854301 | 0.889854301 | -5.622087697 |
| 1438086_at   | -0.010500029 | 3.233839307 | -0.142255767 | 0.889879268 | 0.889879268 | -5.622092158 |
| 1440979_at   | 0.013188896  | 6.434188419 | 0.142171113  | 0.889944312 | 0.889944312 | -5.622103774 |
| 1421702_at   | -0.010204663 | 3.425521426 | -0.142158675 | 0.889953869 | 0.889953869 | -5.62210548  |
| 1452307_at   | 0.010402172  | 7.923992062 | 0.142156593  | 0.889955469 | 0.889955469 | -5.622105766 |
| 1431848_at   | 0.011813018  | 4.659459703 | 0.142139811  | 0.889968364 | 0.889968364 | -5.622108067 |
| 1448348_at   | 0.014157793  | 9.550884689 | 0.142131243  | 0.889974947 | 0.889974947 | -5.622109242 |
| 1425467_a_at | 0.009983324  | 7.540869697 | 0.142118012  | 0.889985113 | 0.889985113 | -5.622111057 |
| 1418855_at   | 0.011583281  | 3.112630413 | 0.142098703  | 0.889999949 | 0.889999949 | -5.622113704 |
| 1436904_at   | -0.012278412 | 4.767818961 | -0.142089159 | 0.890007283 | 0.890007283 | -5.622115013 |
| 1460146_at   | 0.013241226  | 3.044043321 | 0.142065699  | 0.890025309 | 0.890025309 | -5.622118229 |
| 1439727_at   | 0.010825609  | 4.744113622 | 0.142064904  | 0.89002592  | 0.89002592  | -5.622118338 |

|              |              |             |              |             |             |              |
|--------------|--------------|-------------|--------------|-------------|-------------|--------------|
| 1455603_at   | 0.014525809  | 6.200218538 | 0.142034614  | 0.890049194 | 0.890049194 | -5.62212249  |
| 1437368_at   | 0.019513665  | 4.089839589 | 0.142033619  | 0.890049959 | 0.890049959 | -5.622122626 |
| 1435885_s_at | -0.008679959 | 8.869723077 | -0.14201413  | 0.890064933 | 0.890064933 | -5.622125297 |
| 1430543_at   | -0.014644297 | 8.008097492 | -0.141888137 | 0.890161745 | 0.890161745 | -5.622142554 |
| 1436095_at   | -0.014784521 | 5.325254194 | -0.141874044 | 0.890172574 | 0.890172574 | -5.622144483 |
| 1431931_a_at | 0.018484471  | 8.871990036 | 0.141869233  | 0.890176271 | 0.890176271 | -5.622145142 |
| 1441211_at   | -0.012723184 | 4.198225757 | -0.141859588 | 0.890183682 | 0.890183682 | -5.622146462 |
| 1417096_at   | 0.008706521  | 8.444891825 | 0.141858348  | 0.890184635 | 0.890184635 | -5.622146632 |
| 1432917_at   | 0.012949235  | 3.110051144 | 0.141850145  | 0.890190938 | 0.890190938 | -5.622147754 |
| 1416616_s_at | 0.00892984   | 8.932364941 | 0.141838114  | 0.890200182 | 0.890200182 | -5.622149401 |
| 1460533_at   | 0.012282842  | 3.36643025  | 0.141797896  | 0.890231086 | 0.890231086 | -5.622154904 |
| 1431151_at   | 0.012080273  | 5.286538697 | 0.141789599  | 0.890237461 | 0.890237461 | -5.622156039 |
| 1442130_at   | 0.015751708  | 3.93132041  | 0.141774353  | 0.890249177 | 0.890249177 | -5.622158125 |
| 1429153_at   | 0.012133642  | 6.579159632 | 0.141770771  | 0.89025193  | 0.89025193  | -5.622158615 |
| 1440776_at   | 0.017930789  | 5.439180575 | 0.141765577  | 0.890255921 | 0.890255921 | -5.622159326 |
| 1425363_at   | -0.011119738 | 4.75936855  | -0.141732088 | 0.890281654 | 0.890281654 | -5.622163906 |
| 1415735_at   | -0.010024587 | 11.26538072 | -0.141731439 | 0.890282153 | 0.890282153 | -5.622163995 |
| 1433984_a_at | -0.011073683 | 12.05847069 | -0.141655985 | 0.890340133 | 0.890340133 | -5.622174311 |
| 1460339_at   | 0.008957472  | 11.35908723 | 0.141623932  | 0.890364763 | 0.890364763 | -5.622178692 |
| 1423302_a_at | 0.012817379  | 7.597678148 | 0.141613852  | 0.890372509 | 0.890372509 | -5.622180069 |
| 1453012_at   | 0.01601997   | 5.998992388 | 0.141613832  | 0.890372525 | 0.890372525 | -5.622180072 |
| 1418342_at   | 0.008780578  | 9.328120688 | 0.141605523  | 0.890378909 | 0.890378909 | -5.622181207 |
| 1416400_at   | -0.011053176 | 8.614329552 | -0.141589593 | 0.89039115  | 0.89039115  | -5.622183384 |
| 1446286_at   | 0.019362735  | 6.022721165 | 0.141570527  | 0.890405801 | 0.890405801 | -5.622185988 |
| 1456201_at   | -0.010894005 | 8.697199338 | -0.141489917 | 0.890467745 | 0.890467745 | -5.622196997 |
| 1445956_at   | 0.010782564  | 3.192561939 | 0.141448152  | 0.890499839 | 0.890499839 | -5.622202698 |
| 1420968_at   | -0.011325432 | 6.231770405 | -0.141434618 | 0.890510239 | 0.890510239 | -5.622204545 |
| 1424983_a_at | 0.009076395  | 7.053947955 | 0.141415147  | 0.890525202 | 0.890525202 | -5.622207202 |
| 1426367_at   | 0.00885038   | 7.737324784 | 0.141392915  | 0.890542286 | 0.890542286 | -5.622210235 |
| 1459543_at   | 0.021238703  | 4.434481347 | 0.141386474  | 0.890547235 | 0.890547235 | -5.622211114 |
| 1454432_at   | -0.010558595 | 3.971510164 | -0.141381985 | 0.890550686 | 0.890550686 | -5.622211726 |
| 1417456_at   | -0.011860296 | 9.230271141 | -0.141351623 | 0.890574017 | 0.890574017 | -5.622215868 |
| 1429807_at   | 0.010187776  | 3.45205143  | 0.141335911  | 0.890586091 | 0.890586091 | -5.622218011 |
| 1430049_at   | 0.011158909  | 3.260394419 | 0.14132989   | 0.890590718 | 0.890590718 | -5.622218832 |
| 1446452_at   | 0.013428598  | 7.51068131  | 0.141321073  | 0.890597494 | 0.890597494 | -5.622220034 |
| 1430411_at   | 0.010875444  | 3.70306175  | 0.141315821  | 0.89060153  | 0.89060153  | -5.62222075  |
| 1456453_at   | -0.016033771 | 7.249649961 | -0.141282103 | 0.890627441 | 0.890627441 | -5.622225348 |
| 1453709_at   | -0.01573125  | 4.571439749 | -0.141274394 | 0.890633365 | 0.890633365 | -5.622226398 |
| 1451038_at   | -0.012550833 | 7.906228039 | -0.141245986 | 0.890655196 | 0.890655196 | -5.622230271 |
| 1449831_at   | -0.011656122 | 3.66285748  | -0.14121269  | 0.890680783 | 0.890680783 | -5.622234808 |
| 1444856_at   | 0.010833586  | 7.612008556 | 0.141191599  | 0.890696991 | 0.890696991 | -5.622237682 |
| 1431997_at   | -0.010766666 | 8.592447937 | -0.141160241 | 0.890721089 | 0.890721089 | -5.622241953 |
| 1459453_at   | 0.014037282  | 8.57934192  | 0.141134742  | 0.890740685 | 0.890740685 | -5.622245426 |
| 1453985_at   | -0.010676975 | 3.827483824 | -0.141115968 | 0.890755112 | 0.890755112 | -5.622247983 |
| 1432582_at   | -0.009919389 | 4.958207735 | -0.141062106 | 0.890796504 | 0.890796504 | -5.622255315 |
| 1416917_at   | 0.010119855  | 9.216171739 | 0.140960385  | 0.890874677 | 0.890874677 | -5.622269156 |
| 1422302_s_at | -0.00832889  | 12.34047645 | -0.140913265 | 0.89091089  | 0.89091089  | -5.622275564 |
| 1455510_at   | -0.012461988 | 7.706099193 | -0.140873797 | 0.890941221 | 0.890941221 | -5.62228093  |
| 1442738_at   | 0.012586029  | 4.045124828 | 0.14084839   | 0.890960747 | 0.890960747 | -5.622284383 |
| 1435138_at   | 0.017801161  | 4.224777007 | 0.140793688  | 0.891002787 | 0.891002787 | -5.622291816 |
| 1458894_at   | 0.011969263  | 3.67306027  | 0.140790088  | 0.891005554 | 0.891005554 | -5.622292305 |
| 1434878_at   | 0.009378565  | 4.048598641 | 0.140779136  | 0.89101397  | 0.89101397  | -5.622293793 |
| 1458700_at   | 0.015146164  | 6.129595116 | 0.140713511  | 0.891064405 | 0.891064405 | -5.622302705 |

|              |              |             |              |             |             |              |
|--------------|--------------|-------------|--------------|-------------|-------------|--------------|
| 1442488_at   | -0.014995475 | 3.481632994 | -0.140695339 | 0.891078371 | 0.891078371 | -5.622305173 |
| 1436758_at   | -0.012672742 | 7.420703838 | -0.140665774 | 0.891101093 | 0.891101093 | -5.622309186 |
| 1440390_at   | -0.01508382  | 5.689385117 | -0.140631225 | 0.891127646 | 0.891127646 | -5.622313875 |
| 1443524_x_at | -0.015934277 | 8.292003109 | -0.140531492 | 0.891204295 | 0.891204295 | -5.622327404 |
| 1427213_at   | 0.01070884   | 5.901158326 | 0.140504824  | 0.891224792 | 0.891224792 | -5.62233102  |
| 1438675_at   | 0.015880228  | 8.169677782 | 0.140404954  | 0.891301548 | 0.891301548 | -5.622344555 |
| 1442457_at   | -0.012198441 | 3.898024451 | -0.140396266 | 0.891308226 | 0.891308226 | -5.622345732 |
| 1442023_at   | -0.012490604 | 3.102599962 | -0.140393711 | 0.891310189 | 0.891310189 | -5.622346078 |
| 1444981_at   | -0.012276891 | 4.806763652 | -0.140331476 | 0.891358022 | 0.891358022 | -5.622354508 |
| 1447512_at   | 0.014571     | 3.409111337 | 0.140301261  | 0.891381244 | 0.891381244 | -5.622358599 |
| 1418504_at   | -0.009505908 | 10.37646618 | -0.140300127 | 0.891382116 | 0.891382116 | -5.622358752 |
| 1443126_at   | -0.01581317  | 3.69253226  | -0.140254028 | 0.891417548 | 0.891417548 | -5.622364992 |
| 1440542_at   | 0.012842046  | 3.773549685 | 0.140250184  | 0.891420502 | 0.891420502 | -5.622365512 |
| 1417460_at   | 0.009185127  | 11.9310419  | 0.140210166  | 0.89145126  | 0.89145126  | -5.622370928 |
| 1420416_at   | -0.008962584 | 9.371137724 | -0.140203992 | 0.891456005 | 0.891456005 | -5.622371763 |
| 1444349_at   | 0.020871693  | 8.32409798  | 0.140159537  | 0.891490173 | 0.891490173 | -5.622377776 |
| 1416571_at   | -0.013829944 | 6.492596311 | -0.140147838 | 0.891499165 | 0.891499165 | -5.622379358 |
| 1453267_at   | 0.012927219  | 6.016646803 | 0.140083802  | 0.891548384 | 0.891548384 | -5.622388016 |
| 1419828_at   | -0.012979749 | 3.839698713 | -0.140052901 | 0.891572135 | 0.891572135 | -5.622392193 |
| 1439204_at   | -0.023455041 | 5.52569284  | -0.140008319 | 0.891606401 | 0.891606401 | -5.622398217 |
| 1457051_at   | 0.01115838   | 4.610689129 | 0.139993117  | 0.891618085 | 0.891618085 | -5.622400271 |
| 1448344_at   | 0.009040168  | 12.1127926  | 0.139974267  | 0.891632574 | 0.891632574 | -5.622402817 |
| 1442943_at   | 0.011743554  | 4.930395791 | 0.139967064  | 0.891638111 | 0.891638111 | -5.62240379  |
| 1440861_a_at | 0.009611958  | 6.793020977 | 0.139952355  | 0.891649416 | 0.891649416 | -5.622405776 |
| 1417542_at   | -0.01258928  | 8.546825566 | -0.139945114 | 0.891654982 | 0.891654982 | -5.622406754 |
| 1433906_at   | 0.027384437  | 4.791400758 | 0.139926992  | 0.891668911 | 0.891668911 | -5.622409201 |
| 1439797_at   | 0.015146788  | 6.236929852 | 0.139918359  | 0.891675546 | 0.891675546 | -5.622410367 |
| 1419441_at   | -0.008587793 | 13.73626918 | -0.139893018 | 0.891695025 | 0.891695025 | -5.622413788 |
| 1442453_at   | -0.012004781 | 8.121230889 | -0.139872742 | 0.891710609 | 0.891710609 | -5.622416525 |
| 1427386_at   | -0.01046876  | 5.897640187 | -0.1397882   | 0.891775592 | 0.891775592 | -5.622427932 |
| 1439631_at   | 0.011377003  | 8.979677413 | 0.139775072  | 0.891785682 | 0.891785682 | -5.622429703 |
| 1451083_s_at | 0.012160207  | 9.311257609 | 0.139765555  | 0.891792998 | 0.891792998 | -5.622430986 |
| 1423019_at   | -0.01420165  | 4.695762883 | -0.139763522 | 0.89179456  | 0.89179456  | -5.622431261 |
| 1438283_at   | 0.010126007  | 3.904361732 | 0.139755025  | 0.891801092 | 0.891801092 | -5.622432406 |
| 1432403_at   | -0.014986383 | 6.023710897 | -0.13974089  | 0.891811956 | 0.891811956 | -5.622434313 |
| 1430999_a_at | -0.013537735 | 8.693759207 | -0.139739547 | 0.891812988 | 0.891812988 | -5.622434494 |
| 1424264_at   | 0.010061283  | 8.146577859 | 0.139713977  | 0.891832643 | 0.891832643 | -5.622437941 |
| 1428425_at   | 0.009893497  | 7.335595101 | 0.139663889  | 0.891871144 | 0.891871144 | -5.622444693 |
| 1434793_at   | -0.031650255 | 6.737965387 | -0.139658156 | 0.89187555  | 0.89187555  | -5.622445466 |
| 1439100_s_at | -0.012461551 | 3.57429438  | -0.139654663 | 0.891878236 | 0.891878236 | -5.622445936 |
| 1455463_at   | 0.014588382  | 4.064377102 | 0.139625249  | 0.891900845 | 0.891900845 | -5.6224499   |
| 1437846_x_at | -0.021593605 | 4.923441332 | -0.139599478 | 0.891920654 | 0.891920654 | -5.622453372 |
| 1434204_x_at | -0.009928703 | 6.428872795 | -0.139563214 | 0.891948529 | 0.891948529 | -5.622458256 |
| 1456646_at   | 0.008843972  | 7.551859338 | 0.139518044  | 0.891983251 | 0.891983251 | -5.622464338 |
| 1444561_at   | 0.011969105  | 3.156562612 | 0.139488367  | 0.892006063 | 0.892006063 | -5.622468333 |
| 1456091_at   | -0.018518975 | 5.505424016 | -0.139480131 | 0.892012393 | 0.892012393 | -5.622469442 |
| 1425030_at   | 0.010317367  | 7.792188699 | 0.13945986   | 0.892027975 | 0.892027975 | -5.62247217  |
| 1459174_at   | 0.013618731  | 3.473479645 | 0.139445133  | 0.892039296 | 0.892039296 | -5.622474152 |
| 1443526_at   | 0.009873769  | 8.964065807 | 0.139377232  | 0.892091491 | 0.892091491 | -5.622483286 |
| 1419744_at   | 0.009323643  | 4.772394622 | 0.139334958  | 0.892123987 | 0.892123987 | -5.622488971 |
| 1422516_a_at | 0.009860391  | 7.748341623 | 0.139323177  | 0.892133043 | 0.892133043 | -5.622490555 |
| 1422929_s_at | 0.012411022  | 4.573736826 | 0.139321512  | 0.892134322 | 0.892134322 | -5.622490779 |
| 1440284_at   | 0.011280652  | 3.334745446 | 0.139285844  | 0.892161741 | 0.892161741 | -5.622495574 |

|              |              |             |              |             |             |              |
|--------------|--------------|-------------|--------------|-------------|-------------|--------------|
| 1432905_at   | 0.016240942  | 5.559288227 | 0.139282438  | 0.892164359 | 0.892164359 | -5.622496031 |
| 1430853_a_at | -0.012020319 | 5.893132213 | -0.139262992 | 0.892179307 | 0.892179307 | -5.622498645 |
| 1418387_at   | -0.008713366 | 8.440600635 | -0.139255681 | 0.892184927 | 0.892184927 | -5.622499627 |
| 1433732_x_at | 0.010035701  | 9.041252734 | 0.13924411   | 0.892193822 | 0.892193822 | -5.622501182 |
| 1418326_at   | -0.018073617 | 7.89052784  | -0.139230184 | 0.892204527 | 0.892204527 | -5.622503053 |
| 1444872_at   | -0.011315082 | 6.478508747 | -0.1392222   | 0.892210665 | 0.892210665 | -5.622504126 |
| 1440142_s_at | 0.016562553  | 3.609159639 | 0.139219308  | 0.892212888 | 0.892212888 | -5.622504515 |
| 1433184_at   | 0.013985723  | 8.646913172 | 0.139186615  | 0.89223802  | 0.89223802  | -5.622508906 |
| 1417650_at   | -0.012063854 | 5.928228406 | -0.139153032 | 0.892263835 | 0.892263835 | -5.622513416 |
| 1448999_at   | -0.01225605  | 7.752947239 | -0.139151536 | 0.892264985 | 0.892264985 | -5.622513617 |
| 1418898_at   | 0.010577691  | 7.959657092 | 0.139039218  | 0.892351327 | 0.892351327 | -5.622528693 |
| 1440377_at   | -0.015029529 | 3.932032957 | -0.138983996 | 0.892393778 | 0.892393778 | -5.622536101 |
| 1439078_at   | -0.016139698 | 7.326067213 | -0.138983059 | 0.892394499 | 0.892394499 | -5.622536226 |
| 1417492_at   | -0.011503223 | 7.10928547  | -0.138972589 | 0.892402547 | 0.892402547 | -5.62253763  |
| 1454686_at   | 0.048679024  | 8.111086474 | 0.138874173  | 0.892478205 | 0.892478205 | -5.622550824 |
| 1455042_at   | 0.008808473  | 10.04675143 | 0.138871016  | 0.892480632 | 0.892480632 | -5.622551247 |
| 1437621_x_at | 0.010263296  | 10.27106649 | 0.138807109  | 0.892529761 | 0.892529761 | -5.622559809 |
| 1427416_x_at | 0.010395168  | 9.248712612 | 0.138800439  | 0.892534888 | 0.892534888 | -5.622560703 |
| 1443840_x_at | 0.010091492  | 3.606050705 | 0.138754789  | 0.892569983 | 0.892569983 | -5.622566816 |
| 1455607_at   | 0.019516259  | 8.029668855 | 0.138747024  | 0.892575953 | 0.892575953 | -5.622567856 |
| 1455664_at   | -0.012408341 | 4.692819526 | -0.138703566 | 0.892609362 | 0.892609362 | -5.622573674 |
| 1425162_at   | 0.014696214  | 4.798853435 | 0.138639086  | 0.892658932 | 0.892658932 | -5.622582302 |
| 1448971_at   | -0.009312779 | 6.982702071 | -0.13863526  | 0.892661874 | 0.892661874 | -5.622582814 |
| 1422771_at   | 0.013109118  | 8.460846611 | 0.138570857  | 0.892711386 | 0.892711386 | -5.622591428 |
| 1421458_at   | -0.010286522 | 5.859368512 | -0.138545422 | 0.892730941 | 0.892730941 | -5.622594829 |
| 1448195_at   | 0.009289724  | 8.121505685 | 0.138536868  | 0.892737516 | 0.892737516 | -5.622595972 |
| 1417856_at   | -0.01500502  | 5.841796209 | -0.138524998 | 0.892746642 | 0.892746642 | -5.622597559 |
| 1455814_x_at | 0.014352095  | 10.11102831 | 0.138471822  | 0.892787524 | 0.892787524 | -5.622604666 |
| 1431546_at   | 0.011955053  | 4.22579093  | 0.138430458  | 0.892819324 | 0.892819324 | -5.622610193 |
| 1451646_at   | 0.011914698  | 6.986835956 | 0.138427625  | 0.892821502 | 0.892821502 | -5.622610571 |
| 1431488_at   | 0.011686805  | 4.017090327 | 0.138357858  | 0.89287514  | 0.89287514  | -5.622619889 |
| 1416765_s_at | -0.011295666 | 10.45941552 | -0.138352508 | 0.892879253 | 0.892879253 | -5.622620603 |
| 1447920_at   | 0.01172576   | 3.346105414 | 0.138326517  | 0.892899235 | 0.892899235 | -5.622624073 |
| 1423700_at   | 0.016582133  | 8.258904809 | 0.13823916   | 0.892966398 | 0.892966398 | -5.62263573  |
| 1453013_at   | -0.011033333 | 9.179860748 | -0.138185546 | 0.893007618 | 0.893007618 | -5.622642881 |
| 1431296_at   | -0.013005424 | 3.537195474 | -0.138180368 | 0.893011599 | 0.893011599 | -5.622643571 |
| 1440455_at   | 0.016503493  | 5.222266854 | 0.138172186  | 0.89301789  | 0.89301789  | -5.622644662 |
| 1431531_at   | 0.014322746  | 4.411265374 | 0.138149547  | 0.893035296 | 0.893035296 | -5.622647681 |
| 1453381_at   | 0.010773091  | 7.410783269 | 0.138086231  | 0.893083976 | 0.893083976 | -5.62265612  |
| 1436252_at   | -0.008869144 | 7.395883393 | -0.138055357 | 0.893107713 | 0.893107713 | -5.622660233 |
| 1439537_at   | -0.016136207 | 4.693723378 | -0.138047644 | 0.893113643 | 0.893113643 | -5.622661261 |
| 1447670_at   | -0.016548436 | 4.432572916 | -0.138020396 | 0.893134593 | 0.893134593 | -5.622664891 |
| 1437661_at   | 0.00951917   | 5.35270649  | 0.137894465  | 0.893231417 | 0.893231417 | -5.622681656 |
| 1433327_at   | -0.012124689 | 3.784122655 | -0.137837278 | 0.893275386 | 0.893275386 | -5.622689264 |
| 1430978_at   | 0.052096623  | 8.423456475 | 0.137796051  | 0.893307085 | 0.893307085 | -5.622694747 |
| 1441364_at   | 0.009954062  | 4.564439066 | 0.137769044  | 0.89332785  | 0.89332785  | -5.622698338 |
| 1430126_at   | 0.014394395  | 4.999426523 | 0.137718077  | 0.893367038 | 0.893367038 | -5.622705113 |
| 1437947_x_at | 0.011209887  | 9.750431324 | 0.137715901  | 0.893368711 | 0.893368711 | -5.622705402 |
| 1453366_at   | 0.011503176  | 5.209282241 | 0.13771557   | 0.893368965 | 0.893368965 | -5.622705446 |
| 1438951_x_at | 0.010028865  | 8.543774827 | 0.137696135  | 0.893383909 | 0.893383909 | -5.622708029 |
| 1439711_at   | -0.016013374 | 4.670112709 | -0.137664988 | 0.893407858 | 0.893407858 | -5.622712167 |
| 1429589_at   | 0.010495001  | 3.395586292 | 0.137575514  | 0.893476654 | 0.893476654 | -5.62272405  |
| 1445220_at   | -0.013733203 | 3.940970221 | -0.13757517  | 0.893476919 | 0.893476919 | -5.622724096 |

|              |              |             |              |             |             |              |
|--------------|--------------|-------------|--------------|-------------|-------------|--------------|
| 1415946_at   | -0.011828862 | 8.602887355 | -0.137533374 | 0.893509056 | 0.893509056 | -5.622729644 |
| 1432020_at   | -0.012137504 | 3.529933811 | -0.137514036 | 0.893523925 | 0.893523925 | -5.622732211 |
| 1440664_at   | -0.010665337 | 3.937760662 | -0.137492021 | 0.893540853 | 0.893540853 | -5.622735132 |
| 1440904_at   | 0.010797271  | 6.182163947 | 0.137455477  | 0.893568952 | 0.893568952 | -5.62273998  |
| 1443171_at   | 0.015707892  | 5.001874224 | 0.137405878  | 0.89360709  | 0.89360709  | -5.622746558 |
| 1439017_x_at | 0.009156833  | 9.615778117 | 0.137386499  | 0.893621991 | 0.893621991 | -5.622749128 |
| 1445062_at   | -0.017450176 | 4.676369534 | -0.137384269 | 0.893623706 | 0.893623706 | -5.622749423 |
| 1450356_at   | -0.01001399  | 5.782541821 | -0.137381644 | 0.893625725 | 0.893625725 | -5.622749771 |
| 1421118_a_at | 0.015652603  | 5.218997268 | 0.137374011  | 0.893631593 | 0.893631593 | -5.622750783 |
| 1434668_at   | 0.01188152   | 9.160108719 | 0.137354017  | 0.893646968 | 0.893646968 | -5.622753434 |
| 1457545_at   | -0.014126663 | 3.461040216 | -0.137346242 | 0.893652946 | 0.893652946 | -5.622754464 |
| 1432050_at   | 0.012011098  | 4.832951665 | 0.137320559  | 0.893672695 | 0.893672695 | -5.622757868 |
| 1422558_at   | -0.01943406  | 7.152055603 | -0.13731206  | 0.89367923  | 0.89367923  | -5.622758994 |
| 1436862_at   | -0.01925441  | 5.106261762 | -0.137292608 | 0.893694188 | 0.893694188 | -5.622761572 |
| 1433987_at   | 0.009000174  | 3.36900361  | 0.137269829  | 0.893711703 | 0.893711703 | -5.622764589 |
| 1424482_at   | 0.02152141   | 4.064598049 | 0.137248033  | 0.893728463 | 0.893728463 | -5.622767477 |
| 1427144_at   | -0.011203387 | 9.777954812 | -0.137247046 | 0.893729222 | 0.893729222 | -5.622767607 |
| 1458280_at   | -0.008317979 | 6.063506707 | -0.137200824 | 0.893764764 | 0.893764764 | -5.622773728 |
| 1443897_at   | -0.020133728 | 6.580941006 | -0.137125158 | 0.893822948 | 0.893822948 | -5.622783744 |
| 1419413_at   | 0.014643684  | 4.382074554 | 0.137111263  | 0.893833633 | 0.893833633 | -5.622785583 |
| 1429397_a_at | -0.015131404 | 3.408519883 | -0.137023196 | 0.893901353 | 0.893901353 | -5.622797232 |
| 1458797_at   | 0.011287486  | 3.660776411 | 0.136989686  | 0.893927122 | 0.893927122 | -5.622801663 |
| 1434403_at   | -0.015876923 | 9.040924562 | -0.136935273 | 0.893968964 | 0.893968964 | -5.622808855 |
| 1423976_at   | 0.008925716  | 8.796562561 | 0.136878801  | 0.89401239  | 0.89401239  | -5.622816316 |
| 1450038_s_at | 0.013021113  | 7.569176194 | 0.136836907  | 0.894044606 | 0.894044606 | -5.622821849 |
| 1449505_at   | -0.010164    | 8.269573578 | -0.136825652 | 0.894053261 | 0.894053261 | -5.622823335 |
| 1458663_at   | 0.030349493  | 6.289564922 | 0.136798592  | 0.89407407  | 0.89407407  | -5.622826908 |
| 1452304_a_at | 0.009148857  | 8.474017117 | 0.136782615  | 0.894086356 | 0.894086356 | -5.622829017 |
| 1456592_at   | 0.011491184  | 3.545768678 | 0.136775836  | 0.894091569 | 0.894091569 | -5.622829912 |
| 1451971_at   | -0.013423495 | 8.412095379 | -0.136769756 | 0.894096245 | 0.894096245 | -5.622830715 |
| 1421699_at   | 0.010677131  | 3.602500646 | 0.136767801  | 0.894097748 | 0.894097748 | -5.622830973 |
| 1440792_x_at | 0.008140694  | 4.371315575 | 0.136717023  | 0.894136797 | 0.894136797 | -5.622837674 |
| 1448164_at   | -0.010172174 | 10.11383918 | -0.136694919 | 0.894153795 | 0.894153795 | -5.62284059  |
| 1426629_at   | -0.011940933 | 8.538643104 | -0.136672487 | 0.894171046 | 0.894171046 | -5.622843549 |
| 1452674_a_at | 0.008513247  | 11.02769087 | 0.136659039  | 0.894181387 | 0.894181387 | -5.622845322 |
| 1442352_at   | -0.012563673 | 7.509405358 | -0.136644614 | 0.894192481 | 0.894192481 | -5.622847225 |
| 1436048_at   | 0.010291923  | 8.008243996 | 0.13664002   | 0.894196014 | 0.894196014 | -5.622847831 |
| 1458461_at   | 0.015767643  | 4.246712381 | 0.136544983  | 0.894269099 | 0.894269099 | -5.622860358 |
| 1456219_at   | 0.008738511  | 3.423292679 | 0.136477346  | 0.894321114 | 0.894321114 | -5.622869269 |
| 1421809_at   | 0.015095936  | 8.434215966 | 0.136471938  | 0.894325273 | 0.894325273 | -5.622869981 |
| 1450066_at   | -0.008867603 | 8.812371438 | -0.136416492 | 0.894367913 | 0.894367913 | -5.622877282 |
| 1433767_at   | 0.010282815  | 8.256659155 | 0.136346229  | 0.894421948 | 0.894421948 | -5.62288653  |
| 1428297_at   | -0.01374933  | 6.273323204 | -0.136341119 | 0.894425878 | 0.894425878 | -5.622887202 |
| 1421427_at   | 0.014783066  | 6.539579702 | 0.136299233  | 0.89445809  | 0.89445809  | -5.622892713 |
| 1428184_at   | -0.009954707 | 4.051472959 | -0.136264526 | 0.894484782 | 0.894484782 | -5.622897278 |
| 1447559_at   | -0.009890881 | 4.985899865 | -0.136264206 | 0.894485028 | 0.894485028 | -5.62289732  |
| 1441330_at   | -0.013704475 | 3.580516497 | -0.136251434 | 0.894494851 | 0.894494851 | -5.622898999 |
| 1421091_at   | -0.012812982 | 3.546803754 | -0.136217788 | 0.894520727 | 0.894520727 | -5.622903423 |
| 1449535_at   | -0.013035477 | 4.816916385 | -0.13620774  | 0.894528455 | 0.894528455 | -5.622904744 |
| 1438237_at   | -0.019567848 | 5.333951273 | -0.136195152 | 0.894538135 | 0.894538135 | -5.622906398 |
| 1460219_at   | -0.015025396 | 5.316595711 | -0.136193471 | 0.894539428 | 0.894539428 | -5.622906619 |
| 1431439_at   | -0.013019277 | 3.407472001 | -0.136109837 | 0.894603749 | 0.894603749 | -5.622917609 |
| 1423879_at   | 0.012583785  | 8.308904121 | 0.136079564  | 0.894627031 | 0.894627031 | -5.622921585 |

|              |              |             |              |             |             |              |
|--------------|--------------|-------------|--------------|-------------|-------------|--------------|
| 1428540_at   | 0.008293598  | 8.912330336 | 0.13605707   | 0.89464433  | 0.89464433  | -5.622924538 |
| 1434134_at   | -0.009954469 | 9.421947729 | -0.136051515 | 0.894648603 | 0.894648603 | -5.622925268 |
| 1447534_at   | -0.009032408 | 4.603846864 | -0.136043596 | 0.894654694 | 0.894654694 | -5.622926308 |
| 1426997_at   | 0.014038753  | 7.682324779 | 0.136025578  | 0.894668551 | 0.894668551 | -5.622928673 |
| 1425059_at   | 0.011627178  | 6.565466078 | 0.135969733  | 0.894711501 | 0.894711501 | -5.622936003 |
| 1435258_at   | -0.008673089 | 6.897984417 | -0.135934155 | 0.894738863 | 0.894738863 | -5.622940671 |
| 1446487_at   | 0.011925166  | 4.243980463 | 0.135912664  | 0.894755392 | 0.894755392 | -5.62294349  |
| 1459291_at   | 0.009710191  | 4.061305021 | 0.13586683   | 0.894790643 | 0.894790643 | -5.622949501 |
| 1449108_at   | 0.009528359  | 9.345953305 | 0.135861041  | 0.894795095 | 0.894795095 | -5.62295026  |
| 1433583_at   | 0.009039543  | 5.075232551 | 0.135857559  | 0.894797774 | 0.894797774 | -5.622950716 |
| 1419301_at   | 0.009653508  | 8.166179568 | 0.135855381  | 0.894799448 | 0.894799448 | -5.622951002 |
| 1434364_at   | -0.01794123  | 5.098473325 | -0.135820886 | 0.894825979 | 0.894825979 | -5.622955524 |
| 1450637_a_at | -0.011499472 | 8.698946193 | -0.13581117  | 0.894833452 | 0.894833452 | -5.622956798 |
| 1437207_at   | -0.017000723 | 7.662922921 | -0.13579467  | 0.894846142 | 0.894846142 | -5.62295896  |
| 1440482_at   | 0.013477516  | 5.205008632 | 0.13576647   | 0.894867832 | 0.894867832 | -5.622962655 |
| 1433451_at   | 0.013128817  | 7.433424552 | 0.135721503  | 0.894902416 | 0.894902416 | -5.622968546 |
| 1444494_at   | -0.037199505 | 4.591352029 | -0.135701483 | 0.894917814 | 0.894917814 | -5.622971168 |
| 1429565_s_at | -0.012227496 | 3.603733256 | -0.135683196 | 0.894931879 | 0.894931879 | -5.622973563 |
| 1448690_at   | 0.01523554   | 8.367472007 | 0.135617262  | 0.894982591 | 0.894982591 | -5.622982195 |
| 1449188_at   | 0.010439447  | 8.877395758 | 0.135610045  | 0.894988142 | 0.894988142 | -5.62298314  |
| 1454279_at   | -0.009018422 | 4.02551568  | -0.135586355 | 0.895006362 | 0.895006362 | -5.62298624  |
| 1436084_at   | 0.010734596  | 5.626857373 | 0.135516031  | 0.895060452 | 0.895060452 | -5.62299544  |
| 1420845_at   | -0.009545856 | 7.463716713 | -0.135488895 | 0.895081323 | 0.895081323 | -5.622998988 |
| 1436042_at   | 0.013330175  | 6.2795481   | 0.135428096  | 0.895128087 | 0.895128087 | -5.623006937 |
| 1458999_at   | -0.012608322 | 7.262368301 | -0.135381683 | 0.895163786 | 0.895163786 | -5.623013002 |
| 1429642_at   | -0.018911628 | 7.051108202 | -0.135245108 | 0.895268835 | 0.895268835 | -5.623030837 |
| 1457447_at   | -0.010301943 | 7.097271509 | -0.135242108 | 0.895271143 | 0.895271143 | -5.623031229 |
| 1417636_at   | -0.009069995 | 7.874644032 | -0.135238648 | 0.895273805 | 0.895273805 | -5.62303168  |
| 1447918_x_at | 0.010153823  | 3.998689472 | 0.135208985  | 0.89529662  | 0.89529662  | -5.623035552 |
| 1451198_at   | -0.023446939 | 6.617951095 | -0.135128095 | 0.89535884  | 0.89535884  | -5.623046104 |
| 1432725_at   | 0.009966655  | 3.214047928 | 0.135068548  | 0.895404643 | 0.895404643 | -5.623053868 |
| 1443374_at   | 0.009667577  | 4.367124768 | 0.135053294  | 0.895416377 | 0.895416377 | -5.623055856 |
| 1425584_x_at | -0.009766091 | 4.995158197 | -0.135007452 | 0.895451638 | 0.895451638 | -5.62306183  |
| 1420385_at   | 0.018922979  | 5.309387106 | 0.134996541  | 0.895460031 | 0.895460031 | -5.623063252 |
| 1453327_at   | -0.010990561 | 4.492644189 | -0.134849806 | 0.895572902 | 0.895572902 | -5.623082359 |
| 1435862_at   | -0.016332158 | 10.22024163 | -0.134800943 | 0.895610489 | 0.895610489 | -5.623088717 |
| 1433187_at   | -0.01430119  | 5.027847098 | -0.134786312 | 0.895621743 | 0.895621743 | -5.623090621 |
| 1433978_at   | -0.013758245 | 6.58534139  | -0.134761165 | 0.895641087 | 0.895641087 | -5.623093892 |
| 1454847_at   | -0.009842271 | 8.249282753 | -0.134722428 | 0.895670884 | 0.895670884 | -5.623098929 |
| 1449392_at   | -0.011361411 | 3.911763693 | -0.134685211 | 0.895699513 | 0.895699513 | -5.623103768 |
| 1453990_at   | -0.011083039 | 3.531748846 | -0.134670187 | 0.895711071 | 0.895711071 | -5.62310572  |
| 1446192_at   | 0.009286762  | 4.840798607 | 0.134663496  | 0.895716218 | 0.895716218 | -5.62310659  |
| 1421413_a_at | 0.011176282  | 5.627044109 | 0.134609079  | 0.895758078 | 0.895758078 | -5.623113661 |
| 1435824_at   | -0.008001098 | 9.044918959 | -0.134603384 | 0.895762459 | 0.895762459 | -5.623114401 |
| 1445230_at   | 0.015544514  | 5.508319154 | 0.134423519  | 0.895900822 | 0.895900822 | -5.623137751 |
| 1416857_at   | -0.011919278 | 10.45891207 | -0.134407736 | 0.895912963 | 0.895912963 | -5.623139799 |
| 1422125_at   | 0.019448419  | 4.042970979 | 0.134371169  | 0.895941093 | 0.895941093 | -5.623144542 |
| 1419029_at   | -0.01139847  | 7.348157602 | -0.134317848 | 0.895982112 | 0.895982112 | -5.623151455 |
| 1433828_at   | 0.011419422  | 4.746189052 | 0.13431599   | 0.895983541 | 0.895983541 | -5.623151696 |
| 1430617_at   | 0.013063639  | 6.819425468 | 0.134314355  | 0.895984799 | 0.895984799 | -5.623151908 |
| 1447889_x_at | 0.010626277  | 3.805960144 | 0.134296625  | 0.895998438 | 0.895998438 | -5.623154206 |
| 1420980_at   | 0.013491375  | 8.541604813 | 0.13426634   | 0.896021736 | 0.896021736 | -5.623158131 |
| 1428403_at   | 0.012587817  | 6.480895666 | 0.13422969   | 0.896049931 | 0.896049931 | -5.62316288  |

|              |              |             |              |             |             |              |
|--------------|--------------|-------------|--------------|-------------|-------------|--------------|
| 1416302_at   | -0.013584201 | 7.660267103 | -0.134228883 | 0.896050551 | 0.896050551 | -5.623162985 |
| 1421750_a_at | 0.009325363  | 10.19381643 | 0.134214579  | 0.896061556 | 0.896061556 | -5.623164838 |
| 1432189_a_at | -0.013517299 | 6.249653875 | -0.134195556 | 0.89607619  | 0.89607619  | -5.623167302 |
| 1453975_a_at | 0.008771638  | 4.070477801 | 0.134151419  | 0.896110144 | 0.896110144 | -5.623173017 |
| 1449396_at   | 0.013272252  | 5.66128312  | 0.134103556  | 0.896146965 | 0.896146965 | -5.623179213 |
| 1449582_at   | -0.012379774 | 4.082810797 | -0.134085024 | 0.896161223 | 0.896161223 | -5.623181611 |
| 1418826_at   | 0.024878088  | 7.907356996 | 0.134072407  | 0.896170929 | 0.896170929 | -5.623183244 |
| 1447365_at   | -0.010594719 | 4.860118541 | -0.134039205 | 0.896196472 | 0.896196472 | -5.62318754  |
| 1425929_a_at | -0.009261451 | 8.925276224 | -0.133955457 | 0.896260901 | 0.896260901 | -5.623198371 |
| 1436915_x_at | 0.018426694  | 9.989477534 | 0.133941817  | 0.896271394 | 0.896271394 | -5.623200134 |
| 1438666_at   | 0.009603634  | 9.123444076 | 0.133917834  | 0.896289845 | 0.896289845 | -5.623203234 |
| 1460267_at   | -0.011510456 | 4.060719008 | -0.133891969 | 0.896309743 | 0.896309743 | -5.623206577 |
| 1430615_at   | 0.012194502  | 3.847387018 | 0.133891678  | 0.896309967 | 0.896309967 | -5.623206615 |
| 1436429_at   | 0.012347076  | 6.450247338 | 0.133848358  | 0.896343295 | 0.896343295 | -5.623212212 |
| 1445016_at   | -0.009075665 | 3.843820506 | -0.133833298 | 0.896354881 | 0.896354881 | -5.623214157 |
| 1448210_at   | 0.011876797  | 9.621045246 | 0.133806082  | 0.89637582  | 0.89637582  | -5.623217672 |
| 1453760_at   | -0.014534712 | 7.562020274 | -0.133787523 | 0.896390098 | 0.896390098 | -5.623220069 |
| 1422953_at   | 0.017108755  | 4.986350482 | 0.133722698  | 0.896439971 | 0.896439971 | -5.623228437 |
| 1434468_at   | -0.009134038 | 9.577150124 | -0.133654826 | 0.896492188 | 0.896492188 | -5.623237195 |
| 1442641_at   | -0.012641089 | 7.315500925 | -0.13364032  | 0.896503349 | 0.896503349 | -5.623239066 |
| 1458281_at   | 0.013055543  | 4.709146378 | 0.133614747  | 0.896523024 | 0.896523024 | -5.623242364 |
| 1453958_at   | 0.011563237  | 4.012458654 | 0.133600236  | 0.896534188 | 0.896534188 | -5.623244235 |
| 1460140_at   | -0.012451542 | 3.346001207 | -0.133500948 | 0.896610577 | 0.896610577 | -5.623257033 |
| 1448096_at   | -0.014422476 | 6.301387563 | -0.13348665  | 0.896621578 | 0.896621578 | -5.623258876 |
| 1443525_at   | 0.010833666  | 3.451709194 | 0.133452394  | 0.896647934 | 0.896647934 | -5.623263288 |
| 1429737_a_at | -0.00834136  | 8.420722203 | -0.133433114 | 0.896662767 | 0.896662767 | -5.623265772 |
| 1423488_at   | -0.009952362 | 9.17203954  | -0.133413697 | 0.896677706 | 0.896677706 | -5.623268272 |
| 1451274_at   | -0.013210707 | 8.924328993 | -0.133378607 | 0.896704704 | 0.896704704 | -5.62327279  |
| 1427070_at   | -0.014554512 | 6.660288136 | -0.133345352 | 0.89673029  | 0.89673029  | -5.62327707  |
| 1449470_at   | -0.027170736 | 8.382384493 | -0.133290438 | 0.896772541 | 0.896772541 | -5.623284136 |
| 1450727_a_at | 0.010034965  | 8.919852965 | 0.133256279  | 0.896798823 | 0.896798823 | -5.62328853  |
| 1417708_at   | 0.016973478  | 4.691934781 | 0.133253787  | 0.89680074  | 0.89680074  | -5.623288851 |
| 1452494_s_at | -0.010081708 | 3.754104794 | -0.133172967 | 0.896862924 | 0.896862924 | -5.623299242 |
| 1427595_at   | -0.013277591 | 6.022839214 | -0.133160041 | 0.89687287  | 0.89687287  | -5.623300903 |
| 1433975_at   | -0.011118274 | 7.79582451  | -0.133159948 | 0.896872941 | 0.896872941 | -5.623300915 |
| 1419189_at   | 0.009804414  | 7.234863919 | 0.133155822  | 0.896876116 | 0.896876116 | -5.623301446 |
| 1456569_x_at | 0.012066723  | 3.811370417 | 0.133151003  | 0.896879823 | 0.896879823 | -5.623302065 |
| 1429355_at   | -0.01152671  | 4.235465951 | -0.133126674 | 0.896898543 | 0.896898543 | -5.623305191 |
| 1423322_at   | 0.00941408   | 9.214698983 | 0.133069996  | 0.896942152 | 0.896942152 | -5.623312472 |
| 1440536_at   | 0.013515441  | 5.228272931 | 0.133055565  | 0.896953256 | 0.896953256 | -5.623314326 |
| 1455908_a_at | -0.019637568 | 9.703389656 | -0.133044243 | 0.896961967 | 0.896961967 | -5.623315779 |
| 1423219_a_at | 0.009924776  | 8.500608572 | 0.133040907  | 0.896964534 | 0.896964534 | -5.623316208 |
| 1416194_at   | -0.008593404 | 5.026410452 | -0.132996721 | 0.896998532 | 0.896998532 | -5.623321881 |
| 1430673_a_at | 0.01101539   | 5.301235458 | 0.132993992  | 0.897000631 | 0.897000631 | -5.623322231 |
| 1429699_at   | 0.010650234  | 4.71388579  | 0.132965053  | 0.897022898 | 0.897022898 | -5.623325945 |
| 1451720_at   | 0.009355144  | 8.474469026 | 0.132961318  | 0.897025772 | 0.897025772 | -5.623326425 |
| 1425306_at   | 0.009506202  | 4.43260768  | 0.13296031   | 0.897026548 | 0.897026548 | -5.623326554 |
| 1435638_at   | -0.008849016 | 9.202505303 | -0.132923687 | 0.897054727 | 0.897054727 | -5.623331253 |
| 1454721_at   | -0.011884886 | 7.5040179   | -0.13289009  | 0.897080578 | 0.897080578 | -5.623335563 |
| 1418734_at   | 0.008931328  | 3.138931851 | 0.132883568  | 0.897085596 | 0.897085596 | -5.623336399 |
| 1433785_at   | -0.009968752 | 3.62573033  | -0.132800808 | 0.897149276 | 0.897149276 | -5.623347011 |
| 1435234_at   | 0.015116565  | 7.187913036 | 0.132745886  | 0.897191536 | 0.897191536 | -5.623354049 |
| 1457853_at   | 0.009012579  | 4.147198769 | 0.132715381  | 0.897215009 | 0.897215009 | -5.623357957 |

|              |              |             |              |             |             |              |
|--------------|--------------|-------------|--------------|-------------|-------------|--------------|
| 1445888_x_at | 0.012099167  | 6.005165079 | 0.132689704  | 0.897234766 | 0.897234766 | -5.623361246 |
| 1418304_at   | 0.023169232  | 4.336240059 | 0.132642685  | 0.897270946 | 0.897270946 | -5.623367266 |
| 1440161_at   | -0.027965125 | 7.981914272 | -0.132638861 | 0.897273888 | 0.897273888 | -5.623367756 |
| 1442095_at   | 0.012031585  | 8.223782748 | 0.132638672  | 0.897274033 | 0.897274033 | -5.62336778  |
| 1458084_at   | -0.009183693 | 8.184534924 | -0.132604619 | 0.897300237 | 0.897300237 | -5.623372139 |
| 1454621_s_at | 0.01034871   | 7.886915268 | 0.132589751  | 0.897311677 | 0.897311677 | -5.623374042 |
| 1460607_at   | 0.009075352  | 4.264187342 | 0.132583645  | 0.897316376 | 0.897316376 | -5.623374823 |
| 1447210_at   | -0.015995579 | 4.570889033 | -0.132573333 | 0.897324311 | 0.897324311 | -5.623376143 |
| 1416522_a_at | 0.008622277  | 11.05598658 | 0.132498975  | 0.897381528 | 0.897381528 | -5.623385655 |
| 1452372_at   | 0.010174348  | 7.421173058 | 0.132437584  | 0.897428768 | 0.897428768 | -5.623393504 |
| 1455145_at   | 0.013980368  | 8.841657876 | 0.132422088  | 0.897440692 | 0.897440692 | -5.623395485 |
| 1428191_s_at | 0.010703666  | 7.885205635 | 0.132333144  | 0.897509135 | 0.897509135 | -5.623406849 |
| 1456133_x_at | -0.01126304  | 10.46665105 | -0.132284112 | 0.897546866 | 0.897546866 | -5.623413111 |
| 1445921_at   | -0.009633391 | 3.394206643 | -0.132265937 | 0.897560851 | 0.897560851 | -5.623415431 |
| 1420062_at   | -0.013835972 | 5.434010315 | -0.132228754 | 0.897589465 | 0.897589465 | -5.623420177 |
| 1433280_at   | -0.012327936 | 3.778071587 | -0.132161682 | 0.897641078 | 0.897641078 | -5.623428735 |
| 1417059_at   | 0.009716807  | 10.74268187 | 0.132089367  | 0.897696727 | 0.897696727 | -5.623437958 |
| 1436922_at   | 0.010251155  | 4.796632283 | 0.132030157  | 0.897742291 | 0.897742291 | -5.623445505 |
| 1456376_at   | -0.00923912  | 3.413147202 | -0.132010376 | 0.897757513 | 0.897757513 | -5.623448025 |
| 1438305_at   | -0.015638249 | 5.500872691 | -0.131912168 | 0.897833089 | 0.897833089 | -5.623460534 |
| 1415785_a_at | 0.00916606   | 11.04019182 | 0.131848835  | 0.897881827 | 0.897881827 | -5.623468596 |
| 1439291_at   | 0.019202145  | 4.162390063 | 0.131839182  | 0.897889257 | 0.897889257 | -5.623469824 |
| 1436905_x_at | 0.019015516  | 7.602210333 | 0.131832117  | 0.897894693 | 0.897894693 | -5.623470723 |
| 1458675_at   | -0.008524892 | 4.136172636 | -0.131741655 | 0.89796431  | 0.89796431  | -5.62348223  |
| 1440614_at   | 0.021260125  | 5.196929188 | 0.131729835  | 0.897973407 | 0.897973407 | -5.623483733 |
| 1428779_at   | 0.011412018  | 9.183346503 | 0.131723783  | 0.897978064 | 0.897978064 | -5.623484503 |
| 1436036_at   | 0.00975379   | 8.939581668 | 0.131713762  | 0.897985776 | 0.897985776 | -5.623485777 |
| 1456625_at   | -0.021318583 | 5.818636569 | -0.131697911 | 0.897997974 | 0.897997974 | -5.623487792 |
| 1419112_at   | 0.013247841  | 8.300905701 | 0.131683097  | 0.898009375 | 0.898009375 | -5.623489675 |
| 1419335_at   | 0.008812486  | 4.232187309 | 0.131573323  | 0.898093855 | 0.898093855 | -5.623503622 |
| 1433139_at   | 0.01366721   | 3.685043726 | 0.131533211  | 0.898124725 | 0.898124725 | -5.623508715 |
| 1422591_at   | 0.010187705  | 7.750595788 | 0.131527918  | 0.898128799 | 0.898128799 | -5.623509387 |
| 1435156_at   | 0.009911835  | 7.652243428 | 0.131372693  | 0.898248261 | 0.898248261 | -5.623529082 |
| 1440625_at   | -0.015917897 | 5.002373815 | -0.131310962 | 0.89829577  | 0.89829577  | -5.623536907 |
| 1450225_at   | -0.010720062 | 4.884639814 | -0.131268088 | 0.898328767 | 0.898328767 | -5.623542341 |
| 1432676_at   | 0.013541284  | 6.051026884 | 0.131263181  | 0.898332544 | 0.898332544 | -5.623542962 |
| 1452120_at   | -0.009074837 | 8.629366272 | -0.131236658 | 0.898352957 | 0.898352957 | -5.623546323 |
| 1427654_a_at | 0.008363192  | 3.706957126 | 0.131209387  | 0.898373946 | 0.898373946 | -5.623549777 |
| 1444274_at   | 0.015661836  | 4.197603598 | 0.131202114  | 0.898379543 | 0.898379543 | -5.623550698 |
| 1429037_at   | -0.010093244 | 3.150384376 | -0.131124489 | 0.898439287 | 0.898439287 | -5.623560525 |
| 1451712_at   | -0.011502059 | 3.975986199 | -0.1310588   | 0.898489844 | 0.898489844 | -5.623568837 |
| 1429712_at   | -0.013331701 | 7.480852162 | -0.131053752 | 0.898493729 | 0.898493729 | -5.623569476 |
| 1459166_at   | -0.012714142 | 4.278486268 | -0.131040989 | 0.898503552 | 0.898503552 | -5.62357109  |
| 1426174_s_at | -0.012660553 | 3.711294638 | -0.131040111 | 0.898504228 | 0.898504228 | -5.623571201 |
| 1419660_at   | -0.015698682 | 8.9524942   | -0.131032258 | 0.898510272 | 0.898510272 | -5.623572194 |
| 1437393_at   | 0.00959632   | 8.118706173 | 0.131022066  | 0.898518117 | 0.898518117 | -5.623573484 |
| 1439099_at   | 0.007779141  | 3.803627187 | 0.131007     | 0.898529712 | 0.898529712 | -5.623575389 |
| 1456269_at   | 0.009412059  | 3.463297812 | 0.130980671  | 0.898549976 | 0.898549976 | -5.623578718 |
| 1431479_at   | 0.013904406  | 3.527017724 | 0.130958425  | 0.898567098 | 0.898567098 | -5.62358153  |
| 1450914_at   | -0.016611826 | 10.87545023 | -0.130899368 | 0.898612552 | 0.898612552 | -5.623588993 |
| 1430755_at   | -0.013850651 | 4.625029735 | -0.130896273 | 0.898614934 | 0.898614934 | -5.623589385 |
| 1417854_at   | 0.009604639  | 8.350536813 | 0.13087234   | 0.898633355 | 0.898633355 | -5.623592408 |
| 1444166_at   | -0.012117585 | 6.282657524 | -0.130860718 | 0.8986423   | 0.8986423   | -5.623593876 |



|              |              |             |              |             |             |              |
|--------------|--------------|-------------|--------------|-------------|-------------|--------------|
| 1416065_a_at | 0.017173824  | 9.900460864 | 0.130820309  | 0.898673402 | 0.898673402 | -5.62359898  |
| 1434185_at   | -0.009589677 | 8.988997871 | -0.130817332 | 0.898675693 | 0.898675693 | -5.623599356 |
| 1434295_at   | 0.013046982  | 4.86953154  | 0.13079364   | 0.898693928 | 0.898693928 | -5.623602347 |
| 1448498_at   | 0.016411021  | 8.689770389 | 0.13078505   | 0.89870054  | 0.89870054  | -5.623603431 |
| 1418897_at   | -0.011136066 | 4.894065891 | -0.130774528 | 0.898708638 | 0.898708638 | -5.623604759 |
| 1455878_at   | -0.009931314 | 9.772354918 | -0.130774368 | 0.898708761 | 0.898708761 | -5.62360478  |
| 1453816_at   | 0.019656636  | 4.012369235 | 0.130767332  | 0.898714177 | 0.898714177 | -5.623605668 |
| 1453668_at   | 0.013962047  | 5.772744593 | 0.13075959   | 0.898720136 | 0.898720136 | -5.623606645 |
| 1426883_at   | -0.013499338 | 6.974701919 | -0.130667841 | 0.898790754 | 0.898790754 | -5.623618221 |
| 1457216_at   | 0.012340381  | 7.601423395 | 0.130641862  | 0.89881075  | 0.89881075  | -5.623621497 |
| 1419907_s_at | -0.013396108 | 3.573533957 | -0.130633155 | 0.898817452 | 0.898817452 | -5.623622595 |
| 1434247_at   | 0.009391547  | 3.994261563 | 0.130599301  | 0.898843509 | 0.898843509 | -5.623626863 |
| 1437188_at   | 0.011942801  | 6.431407109 | 0.130598146  | 0.898844398 | 0.898844398 | -5.623627009 |
| 1442169_at   | 0.010953819  | 5.735507652 | 0.130586163  | 0.898853621 | 0.898853621 | -5.62362852  |
| 1455257_at   | 0.019449585  | 4.984675487 | 0.130543098  | 0.898886769 | 0.898886769 | -5.623633947 |
| 1424793_a_at | -0.016334503 | 4.219090645 | -0.130496013 | 0.898923011 | 0.898923011 | -5.623639879 |
| 1448088_at   | -0.008815107 | 4.580864028 | -0.130488574 | 0.898928736 | 0.898928736 | -5.623640816 |
| 1445267_at   | -0.012776892 | 5.428609733 | -0.130485563 | 0.898931054 | 0.898931054 | -5.623641195 |
| 1460154_at   | -0.012045555 | 3.168822231 | -0.130478789 | 0.898936269 | 0.898936269 | -5.623642048 |
| 1419640_at   | -0.013181734 | 9.010330195 | -0.130437866 | 0.898967767 | 0.898967767 | -5.623647201 |
| 1415752_at   | 0.009627666  | 10.07262133 | 0.130437712  | 0.898967886 | 0.898967886 | -5.623647221 |
| 1451308_at   | 0.016487311  | 6.246421886 | 0.130419244  | 0.898982101 | 0.898982101 | -5.623649546 |
| 1457338_at   | -0.010764414 | 6.235421379 | -0.13041036  | 0.898988939 | 0.898988939 | -5.623650664 |
| 1424649_a_at | 0.016592116  | 4.682888914 | 0.13040033   | 0.89899666  | 0.89899666  | -5.623651927 |
| 1434287_at   | 0.009006273  | 8.410809702 | 0.130375612  | 0.899015686 | 0.899015686 | -5.623655038 |
| 1417957_a_at | 0.018807247  | 5.623834742 | 0.130307377  | 0.899068208 | 0.899068208 | -5.623663623 |
| 1428670_at   | 0.066270568  | 6.529874261 | 0.13028977   | 0.899081761 | 0.899081761 | -5.623665837 |
| 1459277_at   | -0.01289136  | 4.021589062 | -0.130277139 | 0.899091484 | 0.899091484 | -5.623667426 |
| 1428685_at   | 0.010430226  | 4.043274165 | 0.130265452  | 0.899100479 | 0.899100479 | -5.623668895 |
| 1418098_at   | -0.012687173 | 6.813924309 | -0.130263674 | 0.899101848 | 0.899101848 | -5.623669119 |
| 1426046_a_at | 0.008835648  | 8.131874072 | 0.130262208  | 0.899102977 | 0.899102977 | -5.623669303 |
| 1434327_at   | -0.013013715 | 5.522759575 | -0.130257434 | 0.899106651 | 0.899106651 | -5.623669903 |
| 1457772_at   | -0.010007155 | 4.518908144 | -0.13023942  | 0.899120517 | 0.899120517 | -5.623672168 |
| 1459629_at   | 0.011367279  | 3.1706782   | 0.130194738  | 0.899154911 | 0.899154911 | -5.623677784 |
| 1422237_at   | -0.01025213  | 5.197209857 | -0.130191597 | 0.899157329 | 0.899157329 | -5.623678179 |
| 1430747_at   | -0.009925071 | 4.437513691 | -0.130173775 | 0.899171048 | 0.899171048 | -5.623680419 |
| 1456520_at   | 0.008516103  | 7.535811518 | 0.130165804  | 0.899177183 | 0.899177183 | -5.62368142  |
| 1439191_at   | 0.012737682  | 8.899008998 | 0.130149577  | 0.899189674 | 0.899189674 | -5.623683459 |
| 1451863_at   | 0.014757225  | 4.653824945 | 0.13006809   | 0.899252399 | 0.899252399 | -5.623693693 |
| 1441295_at   | 0.019673385  | 5.007080899 | 0.130050902  | 0.899265629 | 0.899265629 | -5.62369585  |
| 1456025_at   | -0.01099787  | 4.735862359 | -0.130048729 | 0.899267302 | 0.899267302 | -5.623696123 |
| 1420738_at   | 0.010237247  | 5.609461805 | 0.129984219  | 0.89931696  | 0.89931696  | -5.623704219 |
| 1455012_s_at | 0.010752808  | 9.111398048 | 0.129977692  | 0.899321984 | 0.899321984 | -5.623705038 |
| 1448631_a_at | -0.010656491 | 7.553518288 | -0.129970101 | 0.899327827 | 0.899327827 | -5.62370599  |
| 1436443_a_at | -0.0093781   | 10.61977638 | -0.129958639 | 0.899336651 | 0.899336651 | -5.623707428 |
| 1437778_at   | 0.014100339  | 5.599015467 | 0.129886027  | 0.899392546 | 0.899392546 | -5.623716535 |
| 1426889_at   | 0.011566216  | 7.639603315 | 0.129821498  | 0.899442219 | 0.899442219 | -5.623724623 |
| 1458425_at   | 0.012490653  | 5.548337425 | 0.129790503  | 0.899466078 | 0.899466078 | -5.623728507 |
| 1453628_s_at | -0.010310278 | 4.05433026  | -0.129779723 | 0.899474377 | 0.899474377 | -5.623729857 |
| 1425078_x_at | 0.010659179  | 3.292618306 | 0.129773114  | 0.899479464 | 0.899479464 | -5.623730685 |
| 1419535_at   | -0.012531446 | 3.61372263  | -0.129757313 | 0.899491628 | 0.899491628 | -5.623732664 |
| 1459765_s_at | 0.008850594  | 13.07317016 | 0.129730832  | 0.899512013 | 0.899512013 | -5.623735981 |
| 1448351_at   | -0.011744001 | 9.026242884 | -0.129719758 | 0.899520538 | 0.899520538 | -5.623737367 |

|              |              |             |              |             |             |              |
|--------------|--------------|-------------|--------------|-------------|-------------|--------------|
| 1423795_at   | 0.009553962  | 10.50135684 | 0.129667436  | 0.899560815 | 0.899560815 | -5.623743918 |
| 1441012_at   | 0.008847232  | 3.859521697 | 0.129660295  | 0.899566313 | 0.899566313 | -5.623744811 |
| 1429259_a_at | 0.008773205  | 8.80178041  | 0.12965202   | 0.899572682 | 0.899572682 | -5.623745847 |
| 1430577_at   | 0.033191763  | 6.933081802 | 0.129565118  | 0.899639581 | 0.899639581 | -5.623756719 |
| 1444553_at   | -0.010551956 | 5.487815809 | -0.129542492 | 0.899656998 | 0.899656998 | -5.623759549 |
| 1420895_at   | 0.012021752  | 10.16256213 | 0.129532331  | 0.899664821 | 0.899664821 | -5.623760819 |
| 1454521_at   | -0.010691543 | 6.128617227 | -0.129526819 | 0.899669064 | 0.899669064 | -5.623761508 |
| 1424582_at   | 0.009723707  | 7.77320601  | 0.129520951  | 0.899673582 | 0.899673582 | -5.623762242 |
| 1419393_at   | -0.013337898 | 4.431900615 | -0.129510213 | 0.899681848 | 0.899681848 | -5.623763584 |
| 1451180_a_at | 0.010039019  | 9.076922801 | 0.129478329  | 0.899706393 | 0.899706393 | -5.62376757  |
| 1429498_at   | 0.008488589  | 4.83499026  | 0.129460939  | 0.89971978  | 0.89971978  | -5.623769743 |
| 1439211_at   | -0.013732368 | 3.95040954  | -0.129448647 | 0.899729243 | 0.899729243 | -5.623771279 |
| 1438174_x_at | 0.010628487  | 10.93652857 | 0.129442256  | 0.899734163 | 0.899734163 | -5.623772078 |
| 1437153_at   | -0.008302684 | 3.243737451 | -0.12944225  | 0.899734168 | 0.899734168 | -5.623772079 |
| 1457531_a_at | 0.010865695  | 4.094116301 | 0.129441901  | 0.899734436 | 0.899734436 | -5.623772122 |
| 1423692_at   | 0.008795179  | 10.46234485 | 0.129409556  | 0.899759337 | 0.899759337 | -5.623776163 |
| 1427274_at   | 0.00980354   | 7.269543678 | 0.129405784  | 0.89976224  | 0.89976224  | -5.623776634 |
| 1417878_at   | -0.012454344 | 6.840922477 | -0.129397412 | 0.899768685 | 0.899768685 | -5.62377768  |
| 1422665_a_at | -0.01052055  | 7.694474532 | -0.129387477 | 0.899776334 | 0.899776334 | -5.623778921 |
| 1453263_at   | 0.011336913  | 8.754939902 | 0.129383427  | 0.899779451 | 0.899779451 | -5.623779427 |
| 1433188_at   | -0.012246789 | 3.234112313 | -0.129378739 | 0.89978306  | 0.89978306  | -5.623780012 |
| 1443661_at   | -0.010303609 | 3.742461564 | -0.129298179 | 0.899845079 | 0.899845079 | -5.62379007  |
| 1439410_x_at | 0.011481971  | 11.88790679 | 0.129282256  | 0.899857337 | 0.899857337 | -5.623792057 |
| 1442371_at   | 0.01183378   | 5.394743934 | 0.12926063   | 0.899873986 | 0.899873986 | -5.623794756 |
| 1452994_at   | -0.009061753 | 8.04071126  | -0.129256701 | 0.89987701  | 0.89987701  | -5.623795246 |
| 1439261_x_at | 0.009763722  | 3.598742533 | 0.129224066  | 0.899902134 | 0.899902134 | -5.623799317 |
| 1456706_at   | -0.042174696 | 6.893691984 | -0.12922026  | 0.899905064 | 0.899905064 | -5.623799792 |
| 1417868_a_at | -0.00877674  | 10.75152625 | -0.129206765 | 0.899915454 | 0.899915454 | -5.623801475 |
| 1454744_at   | 0.007985539  | 6.695575013 | 0.129197352  | 0.8999227   | 0.8999227   | -5.623802649 |
| 1441920_x_at | 0.009091214  | 3.743713903 | 0.129158424  | 0.89995267  | 0.89995267  | -5.623807503 |
| 1440584_at   | -0.007900672 | 4.908436034 | -0.129151258 | 0.899958187 | 0.899958187 | -5.623808397 |
| 1445937_at   | -0.018443022 | 5.26772374  | -0.129132369 | 0.899972729 | 0.899972729 | -5.623810752 |
| 1435035_at   | 0.010645213  | 7.79658223  | 0.129095546  | 0.900001077 | 0.900001077 | -5.623815341 |
| 1455021_at   | -0.011211532 | 8.466984004 | -0.129064885 | 0.900024682 | 0.900024682 | -5.623819161 |
| 1434896_at   | 0.012261962  | 9.043830382 | 0.128960278  | 0.900105217 | 0.900105217 | -5.623832189 |
| 1448363_at   | 0.008475602  | 10.8155678  | 0.128918344  | 0.900137501 | 0.900137501 | -5.623837408 |
| 1439600_at   | 0.020783173  | 5.81811235  | 0.128904091  | 0.900148474 | 0.900148474 | -5.623839181 |
| 1455569_at   | -0.013494438 | 6.379472809 | -0.128836852 | 0.900200241 | 0.900200241 | -5.623847546 |
| 1449021_at   | 0.01004861   | 8.322997797 | 0.12880386   | 0.900225641 | 0.900225641 | -5.623851648 |
| 1424219_at   | -0.013659459 | 6.634709028 | -0.128796657 | 0.900231187 | 0.900231187 | -5.623852544 |
| 1451562_at   | -0.011762683 | 5.474680842 | -0.128776371 | 0.900246805 | 0.900246805 | -5.623855066 |
| 1416541_at   | 0.008475308  | 7.693721096 | 0.128728714  | 0.900283497 | 0.900283497 | -5.623860989 |
| 1419644_at   | 0.009987723  | 7.495896904 | 0.128716297  | 0.900293057 | 0.900293057 | -5.623862532 |
| 1419917_s_at | 0.014402333  | 10.67723551 | 0.128710864  | 0.90029724  | 0.90029724  | -5.623863207 |
| 1457581_at   | 0.012140906  | 4.488273552 | 0.128696116  | 0.900308594 | 0.900308594 | -5.623865039 |
| 1441037_at   | 0.014278465  | 7.205082805 | 0.128693211  | 0.900310831 | 0.900310831 | -5.6238654   |
| 1441549_at   | -0.01175742  | 6.461299907 | -0.128673493 | 0.900326012 | 0.900326012 | -5.623867849 |
| 1438931_s_at | 0.021559072  | 7.707131872 | 0.128631325  | 0.900358478 | 0.900358478 | -5.623873086 |
| 1451340_at   | -0.010707553 | 5.869515645 | -0.128612165 | 0.900373229 | 0.900373229 | -5.623875465 |
| 1417020_at   | -0.011663476 | 3.422834981 | -0.12860984  | 0.900375019 | 0.900375019 | -5.623875754 |
| 1458345_s_at | -0.011530854 | 3.385992856 | -0.128579724 | 0.900398206 | 0.900398206 | -5.623879492 |
| 1437115_at   | -0.01616465  | 8.789427721 | -0.128564823 | 0.900409679 | 0.900409679 | -5.623881341 |
| 1436389_at   | -0.008996168 | 9.010727379 | -0.128503166 | 0.90045715  | 0.90045715  | -5.623888991 |

|              |              |             |              |             |             |              |
|--------------|--------------|-------------|--------------|-------------|-------------|--------------|
| 1435814_at   | -0.029060597 | 4.982418015 | -0.128454174 | 0.900494872 | 0.900494872 | -5.623895068 |
| 1436964_at   | 0.078016051  | 6.508273891 | 0.128429572  | 0.900513814 | 0.900513814 | -5.623898118 |
| 1432236_a_at | 0.008982071  | 7.901727803 | 0.128427443  | 0.900515452 | 0.900515452 | -5.623898382 |
| 1450818_a_at | -0.008347143 | 11.21130759 | -0.128408155 | 0.900530303 | 0.900530303 | -5.623900773 |
| 1420672_at   | 0.009656826  | 3.642514311 | 0.128389203  | 0.900544895 | 0.900544895 | -5.623903122 |
| 1440622_at   | 0.014282009  | 5.469561372 | 0.128351197  | 0.900574158 | 0.900574158 | -5.623907831 |
| 1448844_at   | -0.009072044 | 9.035468249 | -0.128337377 | 0.900584799 | 0.900584799 | -5.623909544 |
| 1420577_at   | 0.009819404  | 3.830946367 | 0.128326326  | 0.900593307 | 0.900593307 | -5.623910913 |
| 1448534_at   | -0.015192087 | 7.546722111 | -0.128268509 | 0.900637823 | 0.900637823 | -5.623918073 |
| 1460173_at   | -0.017284203 | 9.919065246 | -0.128266158 | 0.900639633 | 0.900639633 | -5.623918364 |
| 1459022_at   | 0.008514967  | 5.446701488 | 0.128167459  | 0.900715628 | 0.900715628 | -5.62393058  |
| 1449891_a_at | 0.016297128  | 6.052853989 | 0.128085263  | 0.900778917 | 0.900778917 | -5.623940747 |
| 1458864_at   | 0.017757108  | 4.164130763 | 0.12798842   | 0.900853485 | 0.900853485 | -5.623952716 |
| 1439572_at   | 0.01054207   | 7.082681872 | 0.127943625  | 0.900887976 | 0.900887976 | -5.623958249 |
| 1453994_at   | -0.013456497 | 4.538595185 | -0.127925487 | 0.900901943 | 0.900901943 | -5.62396049  |
| 1460087_at   | 0.007603157  | 4.003804491 | 0.127922716  | 0.900904076 | 0.900904076 | -5.623960832 |
| 1419221_a_at | 0.010766298  | 6.333115458 | 0.12789209   | 0.900927659 | 0.900927659 | -5.623964613 |
| 1445918_at   | 0.015485794  | 4.257363005 | 0.127829657  | 0.900975732 | 0.900975732 | -5.623972319 |
| 1420776_a_at | 0.011596524  | 7.644181766 | 0.127817707  | 0.900984933 | 0.900984933 | -5.623973794 |
| 1420851_at   | -0.011953422 | 10.83625911 | -0.127793592 | 0.901003502 | 0.901003502 | -5.623976769 |
| 1423650_at   | 0.01197497   | 8.307684661 | 0.127792623  | 0.901004249 | 0.901004249 | -5.623976888 |
| 1416285_at   | 0.008065049  | 10.43870282 | 0.127783905  | 0.901010961 | 0.901010961 | -5.623977964 |
| 1437692_x_at | -0.009287364 | 6.29261683  | -0.127779272 | 0.901014529 | 0.901014529 | -5.623978535 |
| 1454883_at   | -0.010371763 | 3.233985727 | -0.127729222 | 0.901053068 | 0.901053068 | -5.623984708 |
| 1453854_at   | -0.012112246 | 4.211468559 | -0.127711743 | 0.901066527 | 0.901066527 | -5.623986863 |
| 1419952_at   | 0.015983868  | 5.180193608 | 0.127701176  | 0.901074664 | 0.901074664 | -5.623988166 |
| 1458255_at   | 0.010026203  | 3.772431263 | 0.127700675  | 0.901075049 | 0.901075049 | -5.623988227 |
| 1440647_at   | -0.010921492 | 7.268489213 | -0.12767937  | 0.901091455 | 0.901091455 | -5.623990853 |
| 1457088_at   | 0.02350902   | 6.369312014 | 0.127569057  | 0.901176399 | 0.901176399 | -5.624004444 |
| 1418062_at   | 0.008317152  | 7.151763796 | 0.127551679  | 0.901189781 | 0.901189781 | -5.624006584 |
| 1458922_at   | -0.010755834 | 4.004567353 | -0.12748865  | 0.901238316 | 0.901238316 | -5.624014343 |
| 1417756_a_at | -0.012630194 | 8.448289094 | -0.127485568 | 0.901240689 | 0.901240689 | -5.624014722 |
| 1431431_a_at | 0.009227038  | 6.785649388 | 0.127481277  | 0.901243993 | 0.901243993 | -5.62401525  |
| 1420563_at   | -0.013174822 | 7.333556118 | -0.127387325 | 0.901316341 | 0.901316341 | -5.624026808 |
| 1433422_at   | -0.01185177  | 5.275450915 | -0.127371887 | 0.901328229 | 0.901328229 | -5.624028706 |
| 1425554_a_at | 0.012887429  | 11.10655364 | 0.127371039  | 0.901328882 | 0.901328882 | -5.624028811 |
| 1442857_at   | -0.008837036 | 4.047183258 | -0.12736295  | 0.901335111 | 0.901335111 | -5.624029805 |
| 1422050_at   | -0.00928618  | 3.644523716 | -0.127359928 | 0.901337438 | 0.901337438 | -5.624030177 |
| 1417918_at   | -0.00777798  | 9.621920011 | -0.127356712 | 0.901339914 | 0.901339914 | -5.624030572 |
| 1456705_at   | 0.009180719  | 7.392237174 | 0.127342637  | 0.901350753 | 0.901350753 | -5.624032302 |
| 1448779_at   | -0.013067898 | 8.207460723 | -0.127224329 | 0.901441858 | 0.901441858 | -5.624046839 |
| 1458137_at   | 0.01241834   | 4.1020383   | 0.127194327  | 0.901464961 | 0.901464961 | -5.624050523 |
| 1456437_x_at | 0.011101079  | 4.168781376 | 0.127193024  | 0.901465965 | 0.901465965 | -5.624050683 |
| 1438417_at   | 0.016541548  | 6.90164159  | 0.127163036  | 0.901489058 | 0.901489058 | -5.624054365 |
| 1420834_at   | -0.023022906 | 8.500368506 | -0.127110722 | 0.901529344 | 0.901529344 | -5.624060786 |
| 1450656_at   | -0.010234328 | 7.931345852 | -0.127104049 | 0.901534483 | 0.901534483 | -5.624061605 |
| 1432979_at   | 0.011677878  | 5.271867563 | 0.127095526  | 0.901541047 | 0.901541047 | -5.62406265  |
| 1421062_s_at | 0.010110345  | 11.72106466 | 0.127084884  | 0.901549241 | 0.901549241 | -5.624063956 |
| 1415843_at   | 0.011546731  | 6.132525994 | 0.127081736  | 0.901551666 | 0.901551666 | -5.624064342 |
| 1422360_at   | -0.011615949 | 4.160257512 | -0.127063416 | 0.901565774 | 0.901565774 | -5.624066589 |
| 1445202_at   | -0.014980314 | 4.874477451 | -0.127014634 | 0.901603341 | 0.901603341 | -5.624072572 |
| 1452106_at   | 0.017706153  | 11.01615332 | 0.127003206  | 0.901612141 | 0.901612141 | -5.624073973 |
| 1422633_at   | 0.009620775  | 3.513534266 | 0.126984372  | 0.901626645 | 0.901626645 | -5.624076282 |

|              |              |             |              |             |             |              |
|--------------|--------------|-------------|--------------|-------------|-------------|--------------|
| 1433624_at   | -0.008940602 | 10.92582134 | -0.12697248  | 0.901635803 | 0.901635803 | -5.62407774  |
| 1445634_at   | 0.013272964  | 4.269512664 | 0.126940163  | 0.90166069  | 0.90166069  | -5.6240817   |
| 1450672_a_at | -0.010985488 | 7.441259425 | -0.126939755 | 0.901661005 | 0.901661005 | -5.62408175  |
| 1416051_at   | -0.016419081 | 4.623680439 | -0.126892231 | 0.901697603 | 0.901697603 | -5.624087573 |
| 1433505_a_at | -0.012227429 | 6.994947354 | -0.126887775 | 0.901701034 | 0.901701034 | -5.624088119 |
| 1418499_a_at | -0.017054343 | 6.941881171 | -0.126885332 | 0.901702916 | 0.901702916 | -5.624088418 |
| 1448647_at   | -0.012195861 | 9.654418939 | -0.126853118 | 0.901727725 | 0.901727725 | -5.624092364 |
| 1437276_at   | -0.022667347 | 4.803537679 | -0.126846102 | 0.901733128 | 0.901733128 | -5.624093223 |
| 1439263_at   | 0.015995512  | 5.417126735 | 0.126828619  | 0.901746591 | 0.901746591 | -5.624095363 |
| 1451538_at   | -0.008674326 | 7.943832251 | -0.126809834 | 0.901761058 | 0.901761058 | -5.624097663 |
| 1443686_at   | -0.00887796  | 3.664112118 | -0.126803315 | 0.901766078 | 0.901766078 | -5.624098461 |
| 1428038_at   | 0.011328231  | 3.942387153 | 0.126763939  | 0.901796402 | 0.901796402 | -5.62410328  |
| 1450168_at   | -0.010056287 | 3.646150237 | -0.126721227 | 0.901829296 | 0.901829296 | -5.624108506 |
| 1452689_at   | 0.012240646  | 9.400805834 | 0.126719515  | 0.901830615 | 0.901830615 | -5.624108716 |
| 1437922_at   | -0.009639363 | 3.542437014 | -0.126718544 | 0.901831363 | 0.901831363 | -5.624108835 |
| 1445793_at   | 0.010652198  | 3.665213822 | 0.126713675  | 0.901835112 | 0.901835112 | -5.62410943  |
| 1427066_a_at | 0.008982917  | 8.464945861 | 0.126704072  | 0.901842508 | 0.901842508 | -5.624110605 |
| 1442985_at   | 0.0091846    | 3.363718067 | 0.126687936  | 0.901854934 | 0.901854934 | -5.624112578 |
| 1434573_at   | 0.012811823  | 4.943227711 | 0.126664127  | 0.901873271 | 0.901873271 | -5.62411549  |
| 1430204_at   | -0.009168843 | 4.296895233 | -0.126599318 | 0.901923182 | 0.901923182 | -5.624123412 |
| 1452440_at   | 0.00988066   | 6.400252312 | 0.12655187   | 0.901959724 | 0.901959724 | -5.62412921  |
| 1423932_at   | -0.015712266 | 6.046158283 | -0.126537318 | 0.901970931 | 0.901970931 | -5.624130988 |
| 1421480_a_at | -0.010300095 | 4.542820361 | -0.126494576 | 0.902003849 | 0.902003849 | -5.624136208 |
| 1423974_at   | -0.012977631 | 9.587010153 | -0.126484684 | 0.902011467 | 0.902011467 | -5.624137416 |
| 1458973_at   | -0.00913603  | 3.577515822 | -0.126477807 | 0.902016763 | 0.902016763 | -5.624138256 |
| 1418797_at   | -0.010426821 | 4.33417782  | -0.126464382 | 0.902027103 | 0.902027103 | -5.624139895 |
| 1428882_at   | -0.009430576 | 7.672762861 | -0.12643441  | 0.902050186 | 0.902050186 | -5.624143554 |
| 1428415_at   | 0.008854387  | 7.210228513 | 0.12640787   | 0.902070626 | 0.902070626 | -5.624146793 |
| 1419075_s_at | 0.014588322  | 4.024516971 | 0.126403684  | 0.902073849 | 0.902073849 | -5.624147303 |
| 1418987_at   | -0.010826019 | 4.293562501 | -0.12639575  | 0.902079961 | 0.902079961 | -5.624148272 |
| 1423222_at   | 0.0223875    | 6.411848059 | 0.126383558  | 0.90208935  | 0.90208935  | -5.624149759 |
| 1440716_at   | -0.015408147 | 4.022367918 | -0.126305726 | 0.902149293 | 0.902149293 | -5.624159252 |
| 1422124_a_at | 0.017189902  | 6.782217666 | 0.126274328  | 0.902173475 | 0.902173475 | -5.62416308  |
| 1423963_at   | 0.00960866   | 8.179718461 | 0.126268986  | 0.902177589 | 0.902177589 | -5.624163731 |
| 1419276_at   | 0.023510695  | 6.991526699 | 0.126231298  | 0.902206616 | 0.902206616 | -5.624168325 |
| 1432187_at   | 0.01063003   | 7.178705292 | 0.126212009  | 0.902221472 | 0.902221472 | -5.624170675 |
| 1450557_at   | 0.010114559  | 4.33535383  | 0.126194715  | 0.902234792 | 0.902234792 | -5.624172782 |
| 1458094_at   | 0.011832     | 5.552889978 | 0.126173635  | 0.902251027 | 0.902251027 | -5.62417535  |
| 1429215_at   | -0.018218916 | 5.723857758 | -0.126133576 | 0.90228188  | 0.90228188  | -5.624180229 |
| 1424064_at   | -0.010188365 | 8.966674035 | -0.126090471 | 0.902315079 | 0.902315079 | -5.624185477 |
| 1427802_a_at | -0.011165187 | 3.181067548 | -0.125999805 | 0.90238491  | 0.90238491  | -5.624196509 |
| 1458895_at   | 0.009269636  | 4.756887468 | 0.125998875  | 0.902385627 | 0.902385627 | -5.624196622 |
| 1429360_at   | 0.010983667  | 8.580411037 | 0.125905736  | 0.902457363 | 0.902457363 | -5.624207947 |
| 1434649_at   | -0.00945746  | 8.225355897 | -0.125899477 | 0.902462184 | 0.902462184 | -5.624208708 |
| 1435210_s_at | -0.012845568 | 4.668342744 | -0.125883765 | 0.902474285 | 0.902474285 | -5.624210617 |
| 1432613_at   | -0.016205421 | 4.402858908 | -0.125837439 | 0.902509966 | 0.902509966 | -5.624216246 |
| 1439466_s_at | -0.009857178 | 10.59810701 | -0.125816671 | 0.902525962 | 0.902525962 | -5.624218769 |
| 1454654_at   | 0.009371985  | 7.655883737 | 0.125783405  | 0.902551585 | 0.902551585 | -5.624222809 |
| 1446008_at   | 0.007833417  | 3.415708147 | 0.125735809  | 0.902588245 | 0.902588245 | -5.624228588 |
| 1447768_at   | -0.011309109 | 3.472865926 | -0.125707731 | 0.902609871 | 0.902609871 | -5.624231995 |
| 1419347_x_at | 0.009887816  | 3.314283708 | 0.125683728  | 0.902628359 | 0.902628359 | -5.624234908 |
| 1441871_at   | -0.01079905  | 7.518643686 | -0.125675668 | 0.902634567 | 0.902634567 | -5.624235886 |
| 1439430_x_at | 0.009803374  | 3.663868301 | 0.125669507  | 0.902639312 | 0.902639312 | -5.624236633 |

|              |              |             |              |             |             |              |
|--------------|--------------|-------------|--------------|-------------|-------------|--------------|
| 1458089_at   | -0.011823231 | 5.981551863 | -0.125654672 | 0.902650739 | 0.902650739 | -5.624238433 |
| 1447274_at   | -0.01210473  | 5.70835376  | -0.125611853 | 0.90268372  | 0.90268372  | -5.624243626 |
| 1423303_at   | -0.010278625 | 8.876741245 | -0.125605922 | 0.902688288 | 0.902688288 | -5.624244346 |
| 1458108_at   | 0.014342265  | 6.210111716 | 0.125602459  | 0.902690955 | 0.902690955 | -5.624244765 |
| 1418739_at   | -0.01066471  | 4.404808938 | -0.12560031  | 0.902692611 | 0.902692611 | -5.624245026 |
| 1437984_x_at | -0.010085066 | 12.27951982 | -0.125592132 | 0.90269891  | 0.90269891  | -5.624246018 |
| 1426050_at   | -0.011313569 | 3.7452196   | -0.125584309 | 0.902704936 | 0.902704936 | -5.624246966 |
| 1451457_at   | -0.015320515 | 7.97226306  | -0.125543031 | 0.90273673  | 0.90273673  | -5.62425197  |
| 1437302_at   | 0.009199074  | 3.694682591 | 0.125537856  | 0.902740716 | 0.902740716 | -5.624252597 |
| 1419736_a_at | 0.008417748  | 10.64095675 | 0.125533272  | 0.902744247 | 0.902744247 | -5.624253153 |
| 1416169_at   | -0.009648601 | 3.508687825 | -0.125481507 | 0.902784119 | 0.902784119 | -5.624259425 |
| 1430184_at   | -0.010581947 | 3.814882777 | -0.125374447 | 0.902866584 | 0.902866584 | -5.624272388 |
| 1424042_at   | -0.01204727  | 9.018567285 | -0.125299741 | 0.902924128 | 0.902924128 | -5.624281428 |
| 1451347_at   | -0.013659164 | 7.335316542 | -0.125278514 | 0.902940478 | 0.902940478 | -5.624283995 |
| 1419648_at   | 0.013436373  | 7.872788627 | 0.125255505  | 0.902958202 | 0.902958202 | -5.624286778 |
| 1442182_at   | 0.012851644  | 6.92548189  | 0.125246852  | 0.902964868 | 0.902964868 | -5.624287824 |
| 1453661_at   | 0.009247089  | 6.354942755 | 0.125246706  | 0.90296498  | 0.90296498  | -5.624287842 |
| 1451386_at   | 0.00846008   | 8.518582859 | 0.125187251  | 0.903010777 | 0.903010777 | -5.624295029 |
| 1441861_at   | 0.009960824  | 3.628802311 | 0.125100932  | 0.903077269 | 0.903077269 | -5.624305458 |
| 1447930_at   | 0.01075108   | 8.222937095 | 0.125078343  | 0.903094669 | 0.903094669 | -5.624308186 |
| 1417719_at   | -0.010308924 | 9.09228867  | -0.125027575 | 0.903133775 | 0.903133775 | -5.624314315 |
| 1457523_at   | 0.008754236  | 4.501695937 | 0.125021709  | 0.903138294 | 0.903138294 | -5.624315023 |
| 1429388_at   | 0.009415354  | 3.623474285 | 0.124990872  | 0.903162048 | 0.903162048 | -5.624318744 |
| 1454185_at   | -0.009016127 | 4.6120752   | -0.124988901 | 0.903163567 | 0.903163567 | -5.624318982 |
| 1424503_at   | 0.009736712  | 8.624029986 | 0.124922312  | 0.903214861 | 0.903214861 | -5.624327015 |
| 1429724_at   | 0.010198152  | 8.382233851 | 0.124900329  | 0.903231795 | 0.903231795 | -5.624329666 |
| 1425703_at   | 0.012712799  | 5.166081851 | 0.124883953  | 0.90324441  | 0.90324441  | -5.62433164  |
| 1451649_a_at | -0.011340994 | 8.942359133 | -0.124881211 | 0.903246522 | 0.903246522 | -5.624331971 |
| 1451877_at   | 0.015411302  | 3.519954202 | 0.124878071  | 0.903248941 | 0.903248941 | -5.62433235  |
| 1427583_at   | -0.010518103 | 4.069036799 | -0.124855054 | 0.903266671 | 0.903266671 | -5.624335124 |
| 1429667_at   | 0.012155392  | 3.883916158 | 0.124849882  | 0.903270655 | 0.903270655 | -5.624335748 |
| 1420835_at   | -0.0095703   | 7.137566858 | -0.12483283  | 0.903283791 | 0.903283791 | -5.624337803 |
| 1418861_at   | 0.009948852  | 8.488302468 | 0.124824728  | 0.903290032 | 0.903290032 | -5.624338779 |
| 1446878_at   | 0.011423072  | 3.891337222 | 0.124805634  | 0.903304741 | 0.903304741 | -5.62434108  |
| 1423621_a_at | 0.013124906  | 7.385917833 | 0.124772975  | 0.903329899 | 0.903329899 | -5.624345015 |
| 1435888_at   | -0.018844645 | 8.60582468  | -0.124772531 | 0.903330242 | 0.903330242 | -5.624345068 |
| 1420165_s_at | 0.008013715  | 6.682770583 | 0.124752779  | 0.903345457 | 0.903345457 | -5.624347447 |
| 1450601_at   | -0.009246207 | 3.275445238 | -0.124743478 | 0.903352622 | 0.903352622 | -5.624348567 |
| 1454983_at   | -0.010435431 | 7.529207412 | -0.124716379 | 0.903373497 | 0.903373497 | -5.62435183  |
| 1458492_x_at | 0.014514439  | 5.997165907 | 0.124709857  | 0.903378521 | 0.903378521 | -5.624352616 |
| 1454177_at   | -0.010431233 | 3.806594729 | -0.124639533 | 0.903432695 | 0.903432695 | -5.62436108  |
| 1446182_at   | 0.007816622  | 7.493462664 | 0.124629518  | 0.90344041  | 0.90344041  | -5.624362285 |
| 1424311_at   | 0.009909305  | 9.344986549 | 0.124627707  | 0.903441805 | 0.903441805 | -5.624362503 |
| 1441866_s_at | -0.01217888  | 9.439764697 | -0.124600168 | 0.90346302  | 0.90346302  | -5.624365816 |
| 1420896_at   | 0.008990971  | 8.831553827 | 0.124570958  | 0.903485522 | 0.903485522 | -5.62436933  |
| 1458177_at   | 0.014670814  | 5.639921402 | 0.124489096  | 0.903548586 | 0.903548586 | -5.624379171 |
| 1457300_at   | 0.01131303   | 3.060474625 | 0.124485943  | 0.903551015 | 0.903551015 | -5.62437955  |
| 1432315_at   | 0.009265132  | 3.693377733 | 0.124430363  | 0.903593831 | 0.903593831 | -5.624386229 |
| 1453281_at   | -0.016803363 | 5.42636898  | -0.124411627 | 0.903608265 | 0.903608265 | -5.624388479 |
| 1458969_at   | 0.010838176  | 7.159977925 | 0.124374029  | 0.903637229 | 0.903637229 | -5.624392994 |
| 1454813_at   | -0.007689034 | 12.82973951 | -0.124334132 | 0.903667965 | 0.903667965 | -5.624397784 |
| 1458052_at   | 0.023625423  | 5.444141157 | 0.124216699  | 0.903758434 | 0.903758434 | -5.624411874 |
| 1431402_at   | 0.015081453  | 6.6727504   | 0.124185197  | 0.903782703 | 0.903782703 | -5.624415651 |

|              |              |             |              |             |             |              |
|--------------|--------------|-------------|--------------|-------------|-------------|--------------|
| 1454289_at   | 0.010277038  | 5.52881673  | 0.124149682  | 0.903810064 | 0.903810064 | -5.624419909 |
| 1432491_at   | 0.008976909  | 3.455962139 | 0.124104758  | 0.903844674 | 0.903844674 | -5.624425292 |
| 1453461_at   | -0.016410915 | 4.287904778 | -0.124074068 | 0.903868318 | 0.903868318 | -5.624428969 |
| 1446500_at   | -0.012720769 | 6.296820781 | -0.124064758 | 0.90387549  | 0.90387549  | -5.624430084 |
| 1437554_at   | -0.012791725 | 4.519155393 | -0.124064589 | 0.90387562  | 0.90387562  | -5.624430104 |
| 1436177_at   | -0.010761085 | 5.421592007 | -0.124059266 | 0.903879721 | 0.903879721 | -5.624430742 |
| 1438104_at   | -0.009808321 | 6.930073897 | -0.124019504 | 0.903910354 | 0.903910354 | -5.624435503 |
| 1445970_at   | -0.010521164 | 6.148136881 | -0.123993894 | 0.903930084 | 0.903930084 | -5.624438569 |
| 1428603_at   | -0.01052388  | 7.343944275 | -0.123991652 | 0.903931812 | 0.903931812 | -5.624438838 |
| 1455314_at   | 0.010382435  | 9.435731867 | 0.123961487  | 0.903955052 | 0.903955052 | -5.624442448 |
| 1431409_at   | 0.010843983  | 4.938547636 | 0.123951849  | 0.903962476 | 0.903962476 | -5.624443602 |
| 1449397_at   | 0.012937145  | 4.440116208 | 0.123927904  | 0.903980924 | 0.903980924 | -5.624446467 |
| 1448068_at   | -0.012338727 | 5.491491878 | -0.123911763 | 0.90399336  | 0.90399336  | -5.624448398 |
| 1455816_a_at | 0.01785243   | 9.515751582 | 0.123904322  | 0.903999093 | 0.903999093 | -5.624449288 |
| 1434388_at   | 0.009655561  | 7.73293491  | 0.123900352  | 0.904002151 | 0.904002151 | -5.624449763 |
| 1428179_at   | 0.007929646  | 11.13427567 | 0.123895583  | 0.904005825 | 0.904005825 | -5.624450333 |
| 1432804_at   | 0.010817816  | 3.377554555 | 0.12388781   | 0.904011814 | 0.904011814 | -5.624451263 |
| 1427929_a_at | -0.008298675 | 8.063299284 | -0.123882731 | 0.904015727 | 0.904015727 | -5.624451871 |
| 1435372_a_at | 0.011177253  | 9.506844769 | 0.123879446  | 0.904018258 | 0.904018258 | -5.624452264 |
| 1429307_s_at | 0.008356061  | 7.942573581 | 0.123869062  | 0.904026258 | 0.904026258 | -5.624453505 |
| 1449379_at   | -0.011690705 | 8.586179533 | -0.123829895 | 0.904056433 | 0.904056433 | -5.624458189 |
| 1447691_x_at | 0.019469649  | 6.026393061 | 0.123819689  | 0.904064296 | 0.904064296 | -5.624459409 |
| 1418661_at   | -0.015546088 | 6.125280631 | -0.123809221 | 0.904072361 | 0.904072361 | -5.62446066  |
| 1419986_at   | -0.013272344 | 4.032139578 | -0.123776484 | 0.904097583 | 0.904097583 | -5.624464573 |
| 1458533_at   | -0.011003829 | 3.103855255 | -0.123742614 | 0.904123678 | 0.904123678 | -5.624468619 |
| 1453863_at   | -0.013816543 | 5.536718889 | -0.123722804 | 0.904138941 | 0.904138941 | -5.624470986 |
| 1420999_at   | 0.007731221  | 8.12827707  | 0.123708764  | 0.904149757 | 0.904149757 | -5.624472663 |
| 1419332_at   | -0.012286358 | 9.840014365 | -0.123706742 | 0.904151315 | 0.904151315 | -5.624472904 |
| 1448897_at   | -0.011305387 | 7.620432796 | -0.123701966 | 0.904154995 | 0.904154995 | -5.624473475 |
| 1440958_at   | -0.01272599  | 6.629139802 | -0.12365648  | 0.90419004  | 0.90419004  | -5.624478906 |
| 1427681_s_at | 0.011428982  | 3.614319193 | 0.123635526  | 0.904206184 | 0.904206184 | -5.624481407 |
| 1450789_at   | -0.013435384 | 5.042091147 | -0.12362119  | 0.904217229 | 0.904217229 | -5.624483119 |
| 1450081_x_at | -0.012984253 | 10.18650971 | -0.123572617 | 0.904254652 | 0.904254652 | -5.624488915 |
| 1428207_at   | -0.008101581 | 8.172392159 | -0.123498928 | 0.904311427 | 0.904311427 | -5.624497703 |
| 1434769_at   | -0.008014469 | 7.230462536 | -0.123494263 | 0.904315021 | 0.904315021 | -5.62449826  |
| 1417630_at   | 0.008487449  | 8.36375264  | 0.123451238  | 0.904348171 | 0.904348171 | -5.624503389 |
| 1454959_s_at | -0.009146551 | 9.514548837 | -0.123438233 | 0.904358191 | 0.904358191 | -5.624504938 |
| 1436769_at   | -0.018680478 | 3.69085443  | -0.123353237 | 0.904423679 | 0.904423679 | -5.624515064 |
| 1459404_at   | 0.009587727  | 3.75263309  | 0.123350584  | 0.904425723 | 0.904425723 | -5.62451538  |
| 1416594_at   | 0.016526179  | 9.06722975  | 0.123348519  | 0.904427314 | 0.904427314 | -5.624515626 |
| 1447577_x_at | 0.016379998  | 4.926964261 | 0.123319238  | 0.904449875 | 0.904449875 | -5.624519113 |
| 1440412_at   | -0.013451822 | 4.607681993 | -0.123264097 | 0.90449236  | 0.90449236  | -5.624525676 |
| 1431124_at   | 0.012061481  | 5.445931565 | 0.1232617    | 0.904494207 | 0.904494207 | -5.624525962 |
| 1459861_s_at | -0.015686371 | 9.790893707 | -0.123257566 | 0.904497393 | 0.904497393 | -5.624526454 |
| 1435984_at   | 0.017246499  | 6.2938509   | 0.123212958  | 0.904531763 | 0.904531763 | -5.624531761 |
| 1444911_at   | 0.008220451  | 3.893307181 | 0.123199596  | 0.904542058 | 0.904542058 | -5.62453335  |
| 1451462_a_at | 0.010093726  | 8.153636534 | 0.123196356  | 0.904544555 | 0.904544555 | -5.624533736 |
| 1432019_at   | 0.008343651  | 4.476207747 | 0.123182087  | 0.904555549 | 0.904555549 | -5.624535433 |
| 1450650_at   | 0.012810882  | 8.639826988 | 0.123161768  | 0.904571205 | 0.904571205 | -5.624537849 |
| 1457222_at   | -0.016526983 | 3.771854868 | -0.123143067 | 0.904585614 | 0.904585614 | -5.624540073 |
| 1422001_at   | -0.014495521 | 5.125394593 | -0.123142166 | 0.904586308 | 0.904586308 | -5.62454018  |
| 1459152_at   | -0.00967566  | 3.436196663 | -0.123127497 | 0.904597611 | 0.904597611 | -5.624541924 |
| 1434531_at   | 0.014299006  | 4.01314162  | 0.123120011  | 0.904603379 | 0.904603379 | -5.624542814 |

|              |              |             |              |             |             |              |
|--------------|--------------|-------------|--------------|-------------|-------------|--------------|
| 1440246_at   | 0.008305303  | 3.683522456 | 0.123027801  | 0.904674427 | 0.904674427 | -5.62455377  |
| 1452815_at   | -0.009232876 | 3.162424543 | -0.123024636 | 0.904676867 | 0.904676867 | -5.624554146 |
| 1437220_x_at | 0.009798249  | 8.52327416  | 0.123013619  | 0.904685355 | 0.904685355 | -5.624555455 |
| 1455726_at   | 0.01600249   | 7.529870732 | 0.122984723  | 0.90470762  | 0.90470762  | -5.624558886 |
| 1435430_at   | 0.007766379  | 8.664826641 | 0.122981416  | 0.904710169 | 0.904710169 | -5.624559279 |
| 1457090_at   | -0.014648666 | 5.614622479 | -0.122970266 | 0.90471876  | 0.90471876  | -5.624560603 |
| 1417639_at   | 0.016153205  | 3.723480221 | 0.122967318  | 0.904721032 | 0.904721032 | -5.624560953 |
| 1438775_at   | -0.01542826  | 4.68627185  | -0.122964874 | 0.904722914 | 0.904722914 | -5.624561243 |
| 1433982_at   | -0.008235401 | 7.288841225 | -0.122943156 | 0.904739649 | 0.904739649 | -5.624563821 |
| 1426390_a_at | 0.007468766  | 12.57522871 | 0.122935197  | 0.904745781 | 0.904745781 | -5.624564766 |
| 1444992_at   | 0.017407551  | 6.206996689 | 0.122931423  | 0.90474869  | 0.90474869  | -5.624565214 |
| 1441000_at   | 0.01101758   | 3.703497586 | 0.122917073  | 0.904759746 | 0.904759746 | -5.624566917 |
| 1443810_at   | 0.01515781   | 3.804097114 | 0.12291173   | 0.904763863 | 0.904763863 | -5.624567551 |
| 1437347_at   | 0.014764474  | 8.181286661 | 0.122892449  | 0.90477872  | 0.90477872  | -5.624569839 |
| 1451828_a_at | 0.010524123  | 4.701837999 | 0.122860598  | 0.904803262 | 0.904803262 | -5.624573617 |
| 1421926_at   | 0.011545689  | 6.523338054 | 0.122854782  | 0.904807744 | 0.904807744 | -5.624574307 |
| 1425386_at   | -0.016178628 | 4.53979003  | -0.122830923 | 0.904826128 | 0.904826128 | -5.624577137 |
| 1427799_x_at | 0.008064734  | 3.113304908 | 0.12279749   | 0.904851889 | 0.904851889 | -5.624581101 |
| 1415842_at   | 0.011005457  | 7.540262871 | 0.122772416  | 0.90487121  | 0.90487121  | -5.624584074 |
| 1433668_at   | 0.010578767  | 10.06096695 | 0.122769915  | 0.904873137 | 0.904873137 | -5.62458437  |
| 1433386_at   | -0.016244022 | 3.786233359 | -0.122728208 | 0.904905274 | 0.904905274 | -5.624589313 |
| 1453704_at   | 0.01006967   | 5.290540942 | 0.122715472  | 0.904915088 | 0.904915088 | -5.624590822 |
| 1457353_at   | 0.008773595  | 3.783902577 | 0.122704151  | 0.904923811 | 0.904923811 | -5.624592163 |
| 1458449_at   | -0.016156302 | 4.304902265 | -0.122630071 | 0.904980895 | 0.904980895 | -5.624600937 |
| 1459781_x_at | -0.009687149 | 3.252330276 | -0.122610731 | 0.904995797 | 0.904995797 | -5.624603226 |
| 1446297_at   | -0.010456981 | 5.141183693 | -0.122609386 | 0.904996833 | 0.904996833 | -5.624603385 |
| 1449852_a_at | -0.015112955 | 7.753828923 | -0.12252819  | 0.905059401 | 0.905059401 | -5.624612994 |
| 1443792_at   | 0.009505287  | 5.28877513  | 0.122523792  | 0.905062789 | 0.905062789 | -5.624613514 |
| 1438164_x_at | -0.009247281 | 9.021960727 | -0.122472494 | 0.905102318 | 0.905102318 | -5.624619581 |
| 1437363_at   | 0.009155366  | 8.596432531 | 0.12241438   | 0.905147099 | 0.905147099 | -5.624626451 |
| 1423224_at   | 0.011559797  | 6.843923841 | 0.122384804  | 0.90516989  | 0.90516989  | -5.624629946 |
| 1450630_at   | -0.00882765  | 8.447489052 | -0.122379615 | 0.905173889 | 0.905173889 | -5.62463056  |
| 1415761_at   | 0.008252606  | 9.02596324  | 0.122326681  | 0.90521468  | 0.90521468  | -5.624636813 |
| 1429650_at   | 0.012600914  | 8.611773421 | 0.122268193  | 0.90525975  | 0.90525975  | -5.624643719 |
| 1437477_at   | -0.015112297 | 7.371389335 | -0.122254188 | 0.905270542 | 0.905270542 | -5.624645372 |
| 1455985_x_at | 0.007655097  | 6.403345481 | 0.122237137  | 0.905283681 | 0.905283681 | -5.624647384 |
| 1433092_at   | -0.01121914  | 3.359374085 | -0.122210323 | 0.905304345 | 0.905304345 | -5.624650549 |
| 1451068_s_at | 0.007881638  | 12.83053704 | 0.122094835  | 0.90539334  | 0.90539334  | -5.624664169 |
| 1423463_a_at | -0.011479519 | 7.254354711 | -0.12208245  | 0.905402885 | 0.905402885 | -5.624665629 |
| 1442958_at   | -0.009058897 | 4.211478108 | -0.122073556 | 0.905409739 | 0.905409739 | -5.624666677 |
| 1424658_at   | 0.01593502   | 7.152864168 | 0.122062311  | 0.905418404 | 0.905418404 | -5.624668002 |
| 1416595_at   | -0.007754061 | 9.228100857 | -0.122059466 | 0.905420597 | 0.905420597 | -5.624668338 |
| 1427509_at   | 0.008810173  | 5.786411646 | 0.122038754  | 0.905436557 | 0.905436557 | -5.624670778 |
| 1416475_at   | 0.013735189  | 8.294796375 | 0.121997081  | 0.905468672 | 0.905468672 | -5.624675688 |
| 1421160_a_at | -0.011825659 | 7.445723718 | -0.121994517 | 0.905470648 | 0.905470648 | -5.62467599  |
| 1417519_at   | -0.013119489 | 8.279032599 | -0.121988833 | 0.905475028 | 0.905475028 | -5.624676659 |
| 1433342_at   | -0.010312954 | 3.754111767 | -0.121921065 | 0.905527252 | 0.905527252 | -5.624684639 |
| 1453708_a_at | -0.009920567 | 3.990454621 | -0.121841912 | 0.905588251 | 0.905588251 | -5.624693953 |
| 1417306_at   | 0.010157603  | 7.285068013 | 0.121828671  | 0.905598454 | 0.905598454 | -5.624695511 |
| 1419227_at   | 0.009517257  | 4.320005097 | 0.121744595  | 0.905663247 | 0.905663247 | -5.624705397 |
| 1439878_at   | 0.010049086  | 3.504757706 | 0.121687387  | 0.905707335 | 0.905707335 | -5.62471212  |
| 1452448_at   | -0.009526289 | 6.462707956 | -0.121661069 | 0.905727618 | 0.905727618 | -5.624715212 |
| 1427112_at   | 0.013260873  | 7.881499269 | 0.121626566  | 0.905754207 | 0.905754207 | -5.624719264 |

|              |              |             |              |             |             |              |
|--------------|--------------|-------------|--------------|-------------|-------------|--------------|
| 1433899_x_at | -0.008038381 | 10.31250532 | -0.121615881 | 0.905762442 | 0.905762442 | -5.624720519 |
| 1457943_at   | 0.009711708  | 6.346896154 | 0.121612449  | 0.905765087 | 0.905765087 | -5.624720922 |
| 1438574_at   | -0.013324297 | 3.992003183 | -0.121577947 | 0.905791677 | 0.905791677 | -5.624724972 |
| 1420082_at   | -0.01468632  | 5.148475289 | -0.121576524 | 0.905792773 | 0.905792773 | -5.624725139 |
| 1451173_at   | 0.010368062  | 6.836163924 | 0.121439147  | 0.905898646 | 0.905898646 | -5.624741256 |
| 1432082_at   | -0.008583417 | 3.231462485 | -0.121433    | 0.905903384 | 0.905903384 | -5.624741977 |
| 1446798_at   | 0.01973581   | 5.222896533 | 0.121405666  | 0.90592445  | 0.90592445  | -5.624745181 |
| 1427021_s_at | 0.008468828  | 12.62266712 | 0.121381652  | 0.905942957 | 0.905942957 | -5.624747996 |
| 1417151_a_at | -0.008012881 | 4.91753268  | -0.121374759 | 0.90594827  | 0.90594827  | -5.624748804 |
| 1421536_at   | -0.00926022  | 4.059332567 | -0.121341345 | 0.905974021 | 0.905974021 | -5.624752719 |
| 1436847_s_at | -0.01728412  | 10.03123835 | -0.121273779 | 0.906026094 | 0.906026094 | -5.624760632 |
| 1426121_at   | 0.00792979   | 4.122955152 | 0.121243788  | 0.906049208 | 0.906049208 | -5.624764144 |
| 1437331_a_at | 0.010555329  | 9.735802878 | 0.121229683  | 0.90606008  | 0.90606008  | -5.624765795 |
| 1416243_a_at | -0.007335414 | 13.0040298  | -0.121209542 | 0.906075602 | 0.906075602 | -5.624768152 |
| 1445721_at   | 0.010760662  | 3.519593275 | 0.121207506  | 0.906077171 | 0.906077171 | -5.62476839  |
| 1445364_at   | -0.007598963 | 6.344018396 | -0.121190254 | 0.906090467 | 0.906090467 | -5.624770409 |
| 1427530_at   | -0.010856241 | 4.336908356 | -0.121174747 | 0.906102419 | 0.906102419 | -5.624772224 |
| 1427382_a_at | 0.009426695  | 8.35274286  | 0.121142596  | 0.906127198 | 0.906127198 | -5.624775985 |
| 1418879_at   | -0.008968391 | 5.7737016   | -0.121106712 | 0.906154854 | 0.906154854 | -5.624780181 |
| 1445598_at   | -0.01544051  | 4.66572259  | -0.121099618 | 0.906160322 | 0.906160322 | -5.624781011 |
| 1439771_s_at | 0.010714909  | 4.135569482 | 0.121063201  | 0.90618839  | 0.90618839  | -5.624785268 |
| 1420409_at   | -0.008443188 | 3.59036637  | -0.121053045 | 0.906196216 | 0.906196216 | -5.624786455 |
| 1423610_at   | -0.00762851  | 10.47876361 | -0.121032526 | 0.906212031 | 0.906212031 | -5.624788853 |
| 1433316_at   | 0.009377204  | 3.836915843 | 0.120979354  | 0.906253012 | 0.906253012 | -5.624795066 |
| 1417420_at   | -0.009158144 | 9.803943705 | -0.120972813 | 0.906258054 | 0.906258054 | -5.62479583  |
| 1431521_at   | 0.013027173  | 3.823059397 | 0.120934221  | 0.906287798 | 0.906287798 | -5.624800336 |
| 1443637_at   | -0.010538768 | 4.675811033 | -0.120916274 | 0.906301631 | 0.906301631 | -5.624802432 |
| 1425183_a_at | -0.00720218  | 13.78576351 | -0.120890942 | 0.906321155 | 0.906321155 | -5.624805389 |
| 1441067_at   | 0.00956196   | 4.44758997  | 0.120882903  | 0.906327351 | 0.906327351 | -5.624806327 |
| 1418067_at   | -0.009774285 | 10.50771395 | -0.120811672 | 0.906382252 | 0.906382252 | -5.624814639 |
| 1425076_at   | 0.011139503  | 7.429371719 | 0.120778448  | 0.906407859 | 0.906407859 | -5.624818514 |
| 1457372_at   | 0.010035327  | 4.667421902 | 0.120625369  | 0.906525846 | 0.906525846 | -5.624836354 |
| 1449912_at   | 0.01033311   | 3.707485241 | 0.12061941   | 0.906530439 | 0.906530439 | -5.624837048 |
| 1420561_at   | 0.012921778  | 6.090701036 | 0.120617085  | 0.906532231 | 0.906532231 | -5.624837319 |
| 1455766_at   | -0.023529393 | 6.609208544 | -0.120614798 | 0.906533994 | 0.906533994 | -5.624837585 |
| 1439637_at   | -0.010491162 | 7.64786878  | -0.120550058 | 0.906583894 | 0.906583894 | -5.624845122 |
| 1454657_s_at | -0.007599351 | 9.749038729 | -0.120452725 | 0.906658916 | 0.906658916 | -5.624856447 |
| 1434792_at   | -0.009829475 | 7.144288689 | -0.120448446 | 0.906662214 | 0.906662214 | -5.624856945 |
| 1450190_at   | -0.007935102 | 3.869072323 | -0.120363894 | 0.906727386 | 0.906727386 | -5.624866775 |
| 1457599_at   | -0.008783766 | 6.669639453 | -0.120353713 | 0.906735234 | 0.906735234 | -5.624867958 |
| 1421630_at   | 0.00763644   | 3.914070091 | 0.12031888   | 0.906762083 | 0.906762083 | -5.624872005 |
| 1435905_at   | -0.012764599 | 6.132728658 | -0.120308787 | 0.906769862 | 0.906769862 | -5.624873177 |
| 1432761_at   | 0.010835496  | 4.056043976 | 0.120307429  | 0.906770909 | 0.906770909 | -5.624873335 |
| 1419281_a_at | -0.008712597 | 8.143127354 | -0.120271602 | 0.906798525 | 0.906798525 | -5.624877496 |
| 1457656_s_at | 0.017902758  | 4.489090804 | 0.120220581  | 0.906837852 | 0.906837852 | -5.62488342  |
| 1440679_at   | -0.009306226 | 4.160536536 | -0.120180925 | 0.906868419 | 0.906868419 | -5.624888022 |
| 1444045_at   | 0.018095288  | 6.225239573 | 0.120168379  | 0.90687809  | 0.90687809  | -5.624889478 |
| 1456561_s_at | 0.011038482  | 3.872210426 | 0.120161872  | 0.906883105 | 0.906883105 | -5.624890233 |
| 1424039_at   | -0.009070952 | 10.82559448 | -0.120157657 | 0.906886354 | 0.906886354 | -5.624890722 |
| 1460651_at   | 0.01211382   | 6.236920318 | 0.120147565  | 0.906894133 | 0.906894133 | -5.624891893 |
| 1449132_at   | 0.018867566  | 4.672197211 | 0.120121127  | 0.906914513 | 0.906914513 | -5.62489496  |
| 1431918_at   | 0.009648527  | 7.1189213   | 0.120102866  | 0.906928588 | 0.906928588 | -5.624897077 |
| 1429047_at   | 0.010806369  | 8.777302743 | 0.120036243  | 0.906979943 | 0.906979943 | -5.624904801 |



|              |              |             |              |             |             |              |
|--------------|--------------|-------------|--------------|-------------|-------------|--------------|
| 1447167_at   | 0.010359165  | 7.843794466 | 0.120032105  | 0.906983133 | 0.906983133 | -5.624905281 |
| 1437135_at   | 0.008018068  | 3.994858585 | 0.119986529  | 0.907018264 | 0.907018264 | -5.624910562 |
| 1449561_at   | -0.011062639 | 4.328403119 | -0.119985535 | 0.90701903  | 0.90701903  | -5.624910677 |
| 1428111_at   | 0.013132263  | 8.437841277 | 0.119959364  | 0.907039204 | 0.907039204 | -5.624913709 |
| 1424643_at   | -0.017445837 | 7.901098712 | -0.119948858 | 0.907047302 | 0.907047302 | -5.624914926 |
| 1454405_at   | -0.013349445 | 3.947166574 | -0.119933764 | 0.907058937 | 0.907058937 | -5.624916674 |
| 1449998_at   | -0.013480865 | 4.220590097 | -0.119929693 | 0.907062075 | 0.907062075 | -5.624917145 |
| 1416531_at   | -0.011689062 | 10.02114492 | -0.119923003 | 0.907067232 | 0.907067232 | -5.62491792  |
| 1430995_at   | 0.008426641  | 4.735414978 | 0.119892731  | 0.907090567 | 0.907090567 | -5.624921425 |
| 1435651_a_at | 0.0082588    | 8.032087017 | 0.119874833  | 0.907104364 | 0.907104364 | -5.624923496 |
| 1442978_at   | 0.01157226   | 6.606773005 | 0.119859061  | 0.907116521 | 0.907116521 | -5.624925322 |
| 1437630_at   | 0.008632001  | 8.052829599 | 0.119844589  | 0.907127677 | 0.907127677 | -5.624926997 |
| 1443071_at   | 0.009530375  | 5.084744376 | 0.119843484  | 0.907128529 | 0.907128529 | -5.624927125 |
| 1427771_x_at | 0.008002318  | 6.722868768 | 0.119837897  | 0.907132835 | 0.907132835 | -5.624927771 |
| 1452668_x_at | 0.008892109  | 7.675190712 | 0.119740793  | 0.907207688 | 0.907207688 | -5.624939002 |
| 1423613_at   | 0.008732269  | 9.273045131 | 0.1197277    | 0.907217781 | 0.907217781 | -5.624940516 |
| 1433923_at   | 0.011894114  | 4.843806462 | 0.119696111  | 0.907242132 | 0.907242132 | -5.624944167 |
| 1449031_at   | 0.023627678  | 6.248584541 | 0.119649229  | 0.907278272 | 0.907278272 | -5.624949585 |
| 1419019_a_at | 0.013069471  | 3.377371511 | 0.119622493  | 0.907298881 | 0.907298881 | -5.624952673 |
| 1457811_at   | 0.009463218  | 6.376301216 | 0.119594675  | 0.907320326 | 0.907320326 | -5.624955886 |
| 1426633_s_at | 0.043701684  | 6.396384644 | 0.119506815  | 0.907388055 | 0.907388055 | -5.624966028 |
| 1419943_s_at | -0.008465629 | 8.949064897 | -0.119506262 | 0.907388481 | 0.907388481 | -5.624966092 |
| 1454811_a_at | 0.010792422  | 9.898627434 | 0.119460165  | 0.907424017 | 0.907424017 | -5.62497141  |
| 1457584_at   | 0.009971008  | 3.134250178 | 0.119457889  | 0.907425772 | 0.907425772 | -5.624971672 |
| 1441797_at   | -0.018951172 | 5.104607868 | -0.11943085  | 0.907446616 | 0.907446616 | -5.624974791 |
| 1435416_x_at | -0.011783496 | 9.739461716 | -0.119381147 | 0.907484931 | 0.907484931 | -5.624980521 |
| 1447800_x_at | 0.010676316  | 9.54253648  | 0.11933955   | 0.907516998 | 0.907516998 | -5.624985316 |
| 1435195_at   | -0.011759849 | 8.490862874 | -0.119320626 | 0.907531587 | 0.907531587 | -5.624987496 |
| 1440413_at   | 0.01089825   | 3.480714713 | 0.119293183  | 0.907552742 | 0.907552742 | -5.624990657 |
| 1441788_s_at | -0.019730623 | 8.700705154 | -0.119263984 | 0.907575252 | 0.907575252 | -5.62499402  |
| 1453276_at   | -0.00765545  | 3.415636928 | -0.119241328 | 0.907592718 | 0.907592718 | -5.624996629 |
| 1441699_at   | 0.010470811  | 3.706391635 | 0.119185593  | 0.907635685 | 0.907635685 | -5.625003045 |
| 1443909_at   | 0.013037846  | 6.48058236  | 0.119136184  | 0.907673775 | 0.907673775 | -5.62500873  |
| 1416054_at   | 0.007248465  | 13.5980758  | 0.119098505  | 0.907702822 | 0.907702822 | -5.625013063 |
| 1453105_at   | -0.009902859 | 7.150426396 | -0.119091008 | 0.907708602 | 0.907708602 | -5.625013925 |
| 1447462_at   | -0.019689037 | 5.076919398 | -0.119054567 | 0.907736695 | 0.907736695 | -5.625018115 |
| 1459651_s_at | 0.007528424  | 9.380427206 | 0.119030038  | 0.907755605 | 0.907755605 | -5.625020935 |
| 1419620_at   | 0.011480883  | 6.851915753 | 0.118944285  | 0.907821715 | 0.907821715 | -5.625030787 |
| 1424015_at   | 0.008724092  | 10.55554055 | 0.118939065  | 0.90782574  | 0.90782574  | -5.625031387 |
| 1422010_at   | 0.013701034  | 4.524886596 | 0.118918255  | 0.907841783 | 0.907841783 | -5.625033776 |
| 1431836_x_at | -0.009736039 | 5.672898898 | -0.118835524 | 0.907905564 | 0.907905564 | -5.625043273 |
| 1417222_a_at | -0.018536508 | 8.08131743  | -0.1187927   | 0.907938579 | 0.907938579 | -5.625048186 |
| 1458081_at   | -0.007896295 | 3.615960596 | -0.118789615 | 0.907940958 | 0.907940958 | -5.62504854  |
| 1426458_at   | 0.011133941  | 4.943061143 | 0.118728919  | 0.907987752 | 0.907987752 | -5.6250555   |
| 1434574_at   | -0.008926898 | 7.11541666  | -0.11870579  | 0.908005583 | 0.908005583 | -5.625058151 |
| 1450063_at   | -0.011426606 | 6.621735077 | -0.118663281 | 0.908038357 | 0.908038357 | -5.625063023 |
| 1427993_at   | 0.009794928  | 6.240507181 | 0.118610678  | 0.908078911 | 0.908078911 | -5.625069048 |
| 1426849_at   | -0.016388052 | 7.404133111 | -0.118575047 | 0.908106383 | 0.908106383 | -5.625073129 |
| 1438220_at   | 0.010474674  | 6.825658579 | 0.118541017  | 0.908132618 | 0.908132618 | -5.625077024 |
| 1446292_at   | 0.010396212  | 3.578894236 | 0.118516482  | 0.908151535 | 0.908151535 | -5.625079832 |
| 1425557_x_at | -0.008255723 | 6.885794629 | -0.118480888 | 0.908178977 | 0.908178977 | -5.625083905 |
| 1441427_at   | 0.012401366  | 3.725414896 | 0.118456003  | 0.908198163 | 0.908198163 | -5.625086752 |
| 1421051_s_at | 0.01029518   | 8.078643521 | 0.118409466  | 0.908234043 | 0.908234043 | -5.625092074 |

|              |              |             |              |             |             |              |
|--------------|--------------|-------------|--------------|-------------|-------------|--------------|
| 1440819_s_at | 0.013803213  | 7.918785345 | 0.118408762  | 0.908234586 | 0.908234586 | -5.625092154 |
| 1460442_at   | 0.012596882  | 6.604493553 | 0.118388163  | 0.908250468 | 0.908250468 | -5.625094509 |
| 1427963_s_at | 0.007993994  | 3.455874196 | 0.118381358  | 0.908255714 | 0.908255714 | -5.625095287 |
| 1459273_at   | 0.019071664  | 4.611916594 | 0.118369853  | 0.908264584 | 0.908264584 | -5.625096602 |
| 1417429_at   | -0.014043848 | 8.930625959 | -0.118366803 | 0.908266936 | 0.908266936 | -5.625096951 |
| 1429568_x_at | 0.009209696  | 8.642549667 | 0.118335099  | 0.908291379 | 0.908291379 | -5.625100574 |
| 1423071_x_at | 0.018683957  | 9.596262817 | 0.118256012  | 0.908352356 | 0.908352356 | -5.625109608 |
| 1426269_at   | -0.013011024 | 9.196522654 | -0.11821713  | 0.908382335 | 0.908382335 | -5.625114047 |
| 1416580_a_at | -0.008311973 | 11.00361055 | -0.11821573  | 0.908383414 | 0.908383414 | -5.625114207 |
| 1438459_x_at | 0.013653027  | 9.978991511 | 0.118209608  | 0.908388134 | 0.908388134 | -5.625114905 |
| 1454782_at   | -0.017122765 | 5.819486038 | -0.118183205 | 0.908408491 | 0.908408491 | -5.625117919 |
| 1453525_at   | -0.010013607 | 4.92684509  | -0.118121749 | 0.908455875 | 0.908455875 | -5.62512493  |
| 1448309_at   | 0.008509081  | 8.741305593 | 0.118115287  | 0.908460857 | 0.908460857 | -5.625125667 |
| 1442880_at   | -0.020916933 | 6.378107274 | -0.118111218 | 0.908463994 | 0.908463994 | -5.625126131 |
| 1430823_at   | 0.011624047  | 5.12238949  | 0.118081672  | 0.908486775 | 0.908486775 | -5.625129501 |
| 1428814_at   | -0.010137316 | 5.908975057 | -0.118040313 | 0.908518664 | 0.908518664 | -5.625134216 |
| 1432630_at   | -0.012003222 | 6.249285655 | -0.118015625 | 0.908537699 | 0.908537699 | -5.625137029 |
| 1436172_at   | -0.023567088 | 6.381832994 | -0.118013265 | 0.908539519 | 0.908539519 | -5.625137298 |
| 1448892_at   | -0.009085447 | 10.28866896 | -0.118003186 | 0.90854729  | 0.90854729  | -5.625138447 |
| 1425154_a_at | -0.009793485 | 7.228847335 | -0.117999639 | 0.908550025 | 0.908550025 | -5.625138851 |
| 1426823_s_at | -0.011094767 | 10.84139593 | -0.117949202 | 0.908588913 | 0.908588913 | -5.625144596 |
| 1432332_a_at | -0.013941067 | 8.063290695 | -0.117922649 | 0.908609387 | 0.908609387 | -5.62514762  |
| 1456004_x_at | -0.012979671 | 3.660532751 | -0.117915513 | 0.908614889 | 0.908614889 | -5.625148433 |
| 1460593_at   | 0.010775741  | 7.652560086 | 0.117878608  | 0.908643345 | 0.908643345 | -5.625152634 |
| 1440186_s_at | -0.009861872 | 4.699787932 | -0.117848379 | 0.908666653 | 0.908666653 | -5.625156075 |
| 1441673_at   | -0.01487161  | 5.914569023 | -0.117840191 | 0.908672966 | 0.908672966 | -5.625157006 |
| 1439851_at   | -0.009668913 | 6.834880086 | -0.117812605 | 0.908694236 | 0.908694236 | -5.625160145 |
| 1438947_x_at | -0.010064649 | 9.877814244 | -0.117777413 | 0.908721371 | 0.908721371 | -5.625164148 |
| 1442699_at   | -0.008533187 | 4.788715428 | -0.11774579  | 0.908745755 | 0.908745755 | -5.625167744 |
| 1436531_at   | 0.012876702  | 7.524610725 | 0.117740269  | 0.908750011 | 0.908750011 | -5.625168371 |
| 1421487_a_at | 0.008119896  | 8.687237395 | 0.117738058  | 0.908751716 | 0.908751716 | -5.625168623 |
| 1434663_at   | -0.013496787 | 7.850851872 | -0.117711746 | 0.908772004 | 0.908772004 | -5.625171614 |
| 1423801_a_at | 0.007541196  | 10.49387604 | 0.117657367  | 0.908813934 | 0.908813934 | -5.625177793 |
| 1439999_at   | -0.007890809 | 5.396683526 | -0.117578281 | 0.908874916 | 0.908874916 | -5.625186776 |
| 1422893_at   | 0.007976712  | 6.445445176 | 0.117575865  | 0.908876778 | 0.908876778 | -5.62518705  |
| 1426313_at   | -0.007806197 | 8.42384223  | -0.117555118 | 0.908892775 | 0.908892775 | -5.625189405 |
| 1424389_at   | 0.010328372  | 8.067035481 | 0.117512416  | 0.908925702 | 0.908925702 | -5.625194252 |
| 1423251_at   | 0.008206836  | 10.0548925  | 0.117431769  | 0.908987888 | 0.908987888 | -5.6252034   |
| 1434082_at   | -0.008077855 | 9.570329845 | -0.117350837 | 0.909050295 | 0.909050295 | -5.625212574 |
| 1460603_at   | 0.018503635  | 6.2349168   | 0.11725011   | 0.909127966 | 0.909127966 | -5.625223983 |
| 1444828_at   | 0.009896605  | 5.938431287 | 0.117236962  | 0.909138104 | 0.909138104 | -5.625225471 |
| 1441221_at   | 0.012403217  | 3.801821868 | 0.117222277  | 0.909149428 | 0.909149428 | -5.625227134 |
| 1424258_at   | -0.009413975 | 9.818439508 | -0.117219125 | 0.909151859 | 0.909151859 | -5.625227491 |
| 1425223_at   | 0.011857842  | 5.710153453 | 0.117211574  | 0.909157681 | 0.909157681 | -5.625228345 |
| 1416086_at   | -0.008613289 | 8.052367744 | -0.117131304 | 0.909219579 | 0.909219579 | -5.625237427 |
| 1418159_at   | 0.009448191  | 8.702077583 | 0.117056708  | 0.909277102 | 0.909277102 | -5.625245862 |
| 1426877_a_at | 0.009649895  | 10.76742634 | 0.116978256  | 0.909337598 | 0.909337598 | -5.625254727 |
| 1436386_x_at | 0.011606246  | 2.914733971 | 0.11695745   | 0.909353643 | 0.909353643 | -5.625257077 |
| 1452720_a_at | 0.007287847  | 9.29116977  | 0.116947397  | 0.909361395 | 0.909361395 | -5.625258212 |
| 1456841_at   | 0.01476542   | 4.53506513  | 0.116883895  | 0.909410365 | 0.909410365 | -5.625265381 |
| 1459244_at   | -0.007476454 | 3.645630041 | -0.116878069 | 0.909414857 | 0.909414857 | -5.625266039 |
| 1456865_x_at | -0.013153939 | 9.716995341 | -0.116859411 | 0.909429245 | 0.909429245 | -5.625268145 |
| 1416068_at   | -0.007129636 | 10.22841502 | -0.116810303 | 0.909467115 | 0.909467115 | -5.625273685 |

|              |              |             |              |             |             |              |
|--------------|--------------|-------------|--------------|-------------|-------------|--------------|
| 1435214_at   | 0.012069331  | 5.944257345 | 0.116807411  | 0.909469345 | 0.909469345 | -5.625274011 |
| 1417494_a_at | -0.009439246 | 4.731595246 | -0.116807064 | 0.909469613 | 0.909469613 | -5.62527405  |
| 1423710_at   | -0.011662104 | 10.30931441 | -0.11674871  | 0.909514613 | 0.909514613 | -5.625280631 |
| 1449433_at   | -0.010460424 | 5.188438979 | -0.116733741 | 0.909526156 | 0.909526156 | -5.625282318 |
| 1447636_x_at | 0.007536981  | 6.195564546 | 0.116719339  | 0.909537262 | 0.909537262 | -5.625283941 |
| 1417980_a_at | 0.017081058  | 7.311676475 | 0.116670209  | 0.90957515  | 0.90957515  | -5.625289478 |
| 1418748_at   | -0.007856399 | 3.840366768 | -0.116655141 | 0.90958677  | 0.90958677  | -5.625291175 |
| 1423824_at   | -0.008888211 | 10.22261271 | -0.11656875  | 0.909653392 | 0.909653392 | -5.625300903 |
| 1417016_at   | 0.009736861  | 8.467200213 | 0.116557061  | 0.909662406 | 0.909662406 | -5.625302219 |
| 1455978_a_at | 0.017324971  | 7.795342585 | 0.116520798  | 0.909690372 | 0.909690372 | -5.6253063   |
| 1433565_at   | 0.009026532  | 9.512215597 | 0.116493195  | 0.909711659 | 0.909711659 | -5.625309405 |
| 1418843_at   | 0.008243844  | 9.483504402 | 0.116471994  | 0.909728008 | 0.909728008 | -5.62531179  |
| 1422459_a_at | -0.007777827 | 9.33568267  | -0.116458742 | 0.909738229 | 0.909738229 | -5.62531328  |
| 1432564_at   | -0.013700376 | 3.861919027 | -0.11640117  | 0.909782627 | 0.909782627 | -5.625319753 |
| 1451293_at   | -0.011370466 | 8.302699319 | -0.116364886 | 0.90981061  | 0.90981061  | -5.625323831 |
| 1450019_at   | 0.014918599  | 5.169095572 | 0.116297563  | 0.909862529 | 0.909862529 | -5.625331394 |
| 1422219_a_at | -0.009085853 | 4.27439724  | -0.116283787 | 0.909873153 | 0.909873153 | -5.625332941 |
| 1456153_at   | 0.012141849  | 8.689062462 | 0.116178412  | 0.909954419 | 0.909954419 | -5.625344768 |
| 1432211_a_at | 0.009437325  | 7.035049272 | 0.116146862  | 0.909978752 | 0.909978752 | -5.625348307 |
| 1443747_at   | -0.013481088 | 8.592964502 | -0.116114647 | 0.910003596 | 0.910003596 | -5.62535192  |
| 1437712_x_at | 0.008136533  | 6.87300542  | 0.115963167  | 0.910120422 | 0.910120422 | -5.625368894 |
| 1426018_a_at | -0.013267335 | 6.450986405 | -0.115935605 | 0.910141679 | 0.910141679 | -5.62537198  |
| 1421203_at   | -0.010716939 | 5.255946831 | -0.115923893 | 0.910150712 | 0.910150712 | -5.625373291 |
| 1435325_at   | 0.007313887  | 8.497607189 | 0.115844145  | 0.910212217 | 0.910212217 | -5.625382215 |
| 1416985_at   | -0.009491506 | 8.057541204 | -0.115790441 | 0.910253636 | 0.910253636 | -5.625388222 |
| 1440032_at   | 0.008452551  | 4.551795528 | 0.115784961  | 0.910257863 | 0.910257863 | -5.625388834 |
| 1432278_at   | -0.009102241 | 3.255526455 | -0.115744402 | 0.910289144 | 0.910289144 | -5.625393368 |
| 1427830_at   | -0.015175531 | 3.939438722 | -0.115736528 | 0.910295217 | 0.910295217 | -5.625394248 |
| 1453625_at   | 0.007394026  | 3.074139333 | 0.115726796  | 0.910302723 | 0.910302723 | -5.625395336 |
| 1452162_at   | 0.0076835    | 8.389030734 | 0.115722048  | 0.910306385 | 0.910306385 | -5.625395867 |
| 1420540_a_at | 0.008211798  | 8.002593894 | 0.115701165  | 0.910322491 | 0.910322491 | -5.6253982   |
| 1423288_s_at | 0.011698357  | 6.122288511 | 0.115670003  | 0.910346525 | 0.910346525 | -5.625401681 |
| 1421441_at   | -0.012891501 | 7.794709303 | -0.11548861  | 0.910486429 | 0.910486429 | -5.625421927 |
| 1441443_at   | -0.00851632  | 5.111459661 | -0.115473581 | 0.910498021 | 0.910498021 | -5.625423603 |
| 1421121_at   | 0.007957267  | 7.012790452 | 0.11546712   | 0.910503004 | 0.910503004 | -5.625424323 |
| 1455009_at   | 0.010967722  | 8.686002347 | 0.115464939  | 0.910504686 | 0.910504686 | -5.625424567 |
| 1449953_at   | -0.013466878 | 3.95016705  | -0.115462246 | 0.910506763 | 0.910506763 | -5.625424867 |
| 1448654_at   | 0.008628827  | 8.220645604 | 0.115431366  | 0.910530581 | 0.910530581 | -5.62542831  |
| 1441229_at   | -0.009996346 | 7.027815959 | -0.115411377 | 0.910545998 | 0.910545998 | -5.625430537 |
| 1441597_at   | 0.007104844  | 6.712967427 | 0.115357036  | 0.910587911 | 0.910587911 | -5.625436592 |
| 1452287_at   | -0.014227156 | 7.450481101 | -0.115299681 | 0.910632149 | 0.910632149 | -5.62544298  |
| 1453192_at   | -0.017413175 | 6.300172353 | -0.115292265 | 0.910637869 | 0.910637869 | -5.625443806 |
| 1418575_at   | -0.007666609 | 11.63572154 | -0.115275209 | 0.910651024 | 0.910651024 | -5.625445705 |
| 1453215_at   | -0.013010308 | 4.035526528 | -0.115243756 | 0.910675284 | 0.910675284 | -5.625449205 |
| 1449479_at   | -0.011861422 | 4.094628249 | -0.11523225  | 0.910684159 | 0.910684159 | -5.625450486 |
| 1429530_a_at | -0.00947886  | 6.347187115 | -0.115174232 | 0.910728909 | 0.910728909 | -5.62545694  |
| 1442393_at   | 0.008362773  | 7.86151359  | 0.115103172  | 0.910783718 | 0.910783718 | -5.625464841 |
| 1457837_at   | -0.010584932 | 3.494925765 | -0.115061062 | 0.910816199 | 0.910816199 | -5.625469521 |
| 1458160_at   | -0.023490921 | 3.768258917 | -0.115055146 | 0.910820762 | 0.910820762 | -5.625470179 |
| 1430893_at   | 0.009990762  | 3.528583137 | 0.115007875  | 0.910857224 | 0.910857224 | -5.62547543  |
| 1455164_at   | 0.007538114  | 8.995987666 | 0.115005024  | 0.910859423 | 0.910859423 | -5.625475746 |
| 1441681_at   | -0.008600185 | 3.09596601  | -0.115004438 | 0.910859875 | 0.910859875 | -5.625475811 |
| 1415845_at   | 0.010076905  | 4.576939369 | 0.114948035  | 0.91090338  | 0.91090338  | -5.625482074 |

|              |              |             |              |             |             |              |
|--------------|--------------|-------------|--------------|-------------|-------------|--------------|
| 1453472_a_at | -0.011953481 | 3.905970872 | -0.114880838 | 0.910955212 | 0.910955212 | -5.625489531 |
| 1458079_at   | 0.008867687  | 7.045359682 | 0.114878967  | 0.910956656 | 0.910956656 | -5.625489738 |
| 1455102_at   | -0.008841183 | 7.525082715 | -0.114851667 | 0.910977713 | 0.910977713 | -5.625492767 |
| 1439306_at   | -0.009274057 | 3.657598285 | -0.11481773  | 0.91100389  | 0.91100389  | -5.62549653  |
| 1423092_at   | 0.012113466  | 8.62486264  | 0.114784399  | 0.9110296   | 0.9110296   | -5.625500225 |
| 1452641_at   | 0.013659859  | 6.021556399 | 0.114772439  | 0.911038825 | 0.911038825 | -5.625501551 |
| 1455711_at   | 0.008830294  | 6.299562213 | 0.11476439   | 0.911045034 | 0.911045034 | -5.625502443 |
| 1442120_at   | -0.018291043 | 6.027750029 | -0.114724197 | 0.911076038 | 0.911076038 | -5.625506897 |
| 1441244_at   | 0.014095174  | 5.097981304 | 0.114722723  | 0.911077174 | 0.911077174 | -5.62550706  |
| 1427717_at   | 0.008098693  | 3.352879369 | 0.11466381   | 0.911122618 | 0.911122618 | -5.625513585 |
| 1440108_at   | 0.026791335  | 8.0220834   | 0.11459868   | 0.911172857 | 0.911172857 | -5.625520795 |
| 1460130_at   | 0.0080896    | 3.802013786 | 0.114595919  | 0.911174987 | 0.911174987 | -5.625521101 |
| 1424782_at   | -0.009728002 | 7.761462097 | -0.11458543  | 0.911183077 | 0.911183077 | -5.625522261 |
| 1424820_a_at | 0.015415379  | 10.25562601 | 0.114583463  | 0.911184595 | 0.911184595 | -5.625522479 |
| 1455751_at   | 0.008953309  | 6.743513036 | 0.114575299  | 0.911190892 | 0.911190892 | -5.625523382 |
| 1450409_a_at | -0.008994769 | 7.353923919 | -0.114555425 | 0.911206223 | 0.911206223 | -5.625525581 |
| 1429819_at   | 0.007533826  | 5.721000651 | 0.114552767  | 0.911208273 | 0.911208273 | -5.625525875 |
| 1420049_at   | 0.01173255   | 3.356267153 | 0.114494082  | 0.911253542 | 0.911253542 | -5.625532365 |
| 1428889_at   | -0.007836215 | 8.895675064 | -0.114434211 | 0.911299725 | 0.911299725 | -5.625538983 |
| 1416383_a_at | 0.01018807   | 7.350155894 | 0.114415811  | 0.911313919 | 0.911313919 | -5.625541017 |
| 1442917_at   | 0.009070565  | 7.654103382 | 0.114324853  | 0.911384083 | 0.911384083 | -5.625551063 |
| 1452739_at   | 0.007912521  | 7.972107117 | 0.114320612  | 0.911387355 | 0.911387355 | -5.625551531 |
| 1438221_at   | 0.009362261  | 7.317682762 | 0.114317277  | 0.911389927 | 0.911389927 | -5.625551899 |
| 1424787_a_at | 0.00761144   | 7.280275957 | 0.114116709  | 0.911544647 | 0.911544647 | -5.625574022 |
| 1420412_at   | -0.011182366 | 4.388889109 | -0.114110649 | 0.911549322 | 0.911549322 | -5.62557469  |
| 1460644_at   | -0.008339544 | 8.282037975 | -0.114102596 | 0.911555534 | 0.911555534 | -5.625575577 |
| 1429523_a_at | -0.007842178 | 5.002355474 | -0.114094152 | 0.911562048 | 0.911562048 | -5.625576508 |
| 1459558_at   | 0.015467892  | 4.050749494 | 0.11409304   | 0.911562906 | 0.911562906 | -5.625576663 |
| 1427598_at   | 0.008856617  | 3.78565049  | 0.114059047  | 0.911589128 | 0.911589128 | -5.625580375 |
| 1439034_at   | -0.01036872  | 4.248495066 | -0.114047874 | 0.911597748 | 0.911597748 | -5.625581606 |
| 1434931_at   | -0.008086114 | 9.14937014  | -0.114031543 | 0.911610346 | 0.911610346 | -5.625583404 |
| 1458552_at   | -0.013417124 | 4.077408045 | -0.113989725 | 0.911642605 | 0.911642605 | -5.625588008 |
| 1431147_at   | -0.011818627 | 5.883013102 | -0.113952744 | 0.911671134 | 0.911671134 | -5.625592079 |
| 1426722_at   | 0.009711632  | 11.18423729 | 0.113911238  | 0.911703153 | 0.911703153 | -5.625596645 |
| 1446917_at   | -0.007889488 | 3.250850511 | -0.113908968 | 0.911704904 | 0.911704904 | -5.625596895 |
| 1442628_at   | -0.013033468 | 3.550504388 | -0.113898172 | 0.911713233 | 0.911713233 | -5.625598083 |
| 1423422_at   | 0.022132079  | 8.871243047 | 0.113832207  | 0.911764121 | 0.911764121 | -5.625605336 |
| 1433572_a_at | 0.010837601  | 10.78986539 | 0.113822392  | 0.911771693 | 0.911771693 | -5.625606415 |
| 1424059_at   | 0.01037237   | 8.522749493 | 0.113803691  | 0.911786119 | 0.911786119 | -5.625608471 |
| 1418125_at   | 0.008337918  | 7.289657127 | 0.113790366  | 0.911796399 | 0.911796399 | -5.625609935 |
| 1427991_s_at | 0.009638393  | 8.299090751 | 0.113783852  | 0.911801424 | 0.911801424 | -5.625610651 |
| 1441550_at   | 0.014039695  | 3.667213878 | 0.113763075  | 0.911817452 | 0.911817452 | -5.625612934 |
| 1418983_at   | 0.012063182  | 6.781440317 | 0.113726596  | 0.911845595 | 0.911845595 | -5.625616941 |
| 1434238_at   | 0.014292453  | 8.733373327 | 0.113718174  | 0.911852092 | 0.911852092 | -5.625617866 |
| 1457560_at   | 0.007478241  | 6.290503644 | 0.113698371  | 0.911867369 | 0.911867369 | -5.62562004  |
| 1459623_at   | 0.008160495  | 3.717840219 | 0.113631697  | 0.911918806 | 0.911918806 | -5.625627359 |
| 1433447_x_at | 0.010236113  | 11.72846235 | 0.113615499  | 0.911931301 | 0.911931301 | -5.625629136 |
| 1440232_at   | -0.012046678 | 4.625609643 | -0.113571452 | 0.911965283 | 0.911965283 | -5.625633968 |
| 1444460_at   | 0.007390426  | 7.414028189 | 0.113542979  | 0.911987248 | 0.911987248 | -5.625637091 |
| 1439924_x_at | -0.015825251 | 4.652986471 | -0.113474065 | 0.912040414 | 0.912040414 | -5.625644645 |
| 1431962_a_at | -0.008380147 | 7.841982743 | -0.113450861 | 0.912058315 | 0.912058315 | -5.625647188 |
| 1442671_at   | 0.013788361  | 8.279207896 | 0.113417387  | 0.91208414  | 0.91208414  | -5.625650855 |
| 1449672_s_at | -0.011570458 | 5.002258503 | -0.113396162 | 0.912100515 | 0.912100515 | -5.625653179 |

|              |              |             |              |             |             |              |
|--------------|--------------|-------------|--------------|-------------|-------------|--------------|
| 1453417_at   | -0.010630861 | 5.333300924 | -0.113379533 | 0.912113344 | 0.912113344 | -5.625655    |
| 1448526_at   | 0.010448695  | 10.72814652 | 0.113369712  | 0.912120921 | 0.912120921 | -5.625656075 |
| 1450757_at   | 0.007450131  | 12.4377054  | 0.113341884  | 0.91214239  | 0.91214239  | -5.625659122 |
| 1437957_at   | -0.007602371 | 6.964596151 | -0.113327699 | 0.912153334 | 0.912153334 | -5.625660674 |
| 1454388_at   | 0.011938489  | 5.280019493 | 0.113324573  | 0.912155746 | 0.912155746 | -5.625661016 |
| 1445177_at   | -0.00903355  | 4.327653721 | -0.113312137 | 0.912165339 | 0.912165339 | -5.625662377 |
| 1416894_at   | -0.009840394 | 8.140436574 | -0.113299107 | 0.912175392 | 0.912175392 | -5.625663803 |
| 1434431_x_at | 0.008561685  | 3.674578998 | 0.11329619   | 0.912177643 | 0.912177643 | -5.625664122 |
| 1437086_at   | -0.019005402 | 4.015655014 | -0.113280819 | 0.912189502 | 0.912189502 | -5.625665804 |
| 1452144_a_at | -0.013047392 | 8.939849335 | -0.113267292 | 0.912199937 | 0.912199937 | -5.625667284 |
| 1425822_a_at | -0.010611387 | 7.557754405 | -0.113247665 | 0.91221508  | 0.91221508  | -5.625669431 |
| 1458406_at   | -0.012400217 | 7.314673894 | -0.113225147 | 0.912232453 | 0.912232453 | -5.625671893 |
| 1432776_at   | -0.010226682 | 3.576162308 | -0.11312455  | 0.912310064 | 0.912310064 | -5.625682888 |
| 1446573_at   | 0.012492282  | 4.036307609 | 0.113112423  | 0.91231942  | 0.91231942  | -5.625684213 |
| 1422380_at   | 0.009408161  | 3.3661269   | 0.113089334  | 0.912337234 | 0.912337234 | -5.625686735 |
| 1452724_at   | 0.012348634  | 7.96912766  | 0.113057322  | 0.912361932 | 0.912361932 | -5.62569023  |
| 1440597_at   | -0.010359897 | 4.176609583 | -0.113019591 | 0.912391042 | 0.912391042 | -5.625694349 |
| 1455579_at   | 0.007850854  | 3.308861407 | 0.112993921  | 0.912410847 | 0.912410847 | -5.625697151 |
| 1442778_at   | -0.008341964 | 4.50143094  | -0.112984261 | 0.9124183   | 0.9124183   | -5.625698205 |
| 1436928_s_at | 0.008336525  | 7.079401035 | 0.112982864  | 0.912419378 | 0.912419378 | -5.625698357 |
| 1420428_at   | 0.007433778  | 5.597888398 | 0.112974252  | 0.912426022 | 0.912426022 | -5.625699297 |
| 1447353_at   | 0.00769325   | 3.730999613 | 0.112907085  | 0.912477844 | 0.912477844 | -5.625706623 |
| 1417521_at   | 0.011148294  | 6.461530343 | 0.112874061  | 0.912503323 | 0.912503323 | -5.625710223 |
| 1449401_at   | 0.016996366  | 6.884353668 | 0.112871827  | 0.912505047 | 0.912505047 | -5.625710467 |
| 1433776_at   | 0.008341206  | 9.801809365 | 0.112866569  | 0.912509103 | 0.912509103 | -5.62571104  |
| 1429320_at   | 0.008026045  | 5.145497543 | 0.112864867  | 0.912510417 | 0.912510417 | -5.625711226 |
| 1453654_at   | 0.015923929  | 6.263383467 | 0.112855321  | 0.912517781 | 0.912517781 | -5.625712266 |
| 1446730_at   | 0.013339931  | 4.410360917 | 0.112800789  | 0.912559855 | 0.912559855 | -5.625718208 |
| 1443859_at   | -0.008581884 | 6.370267092 | -0.112772892 | 0.912581379 | 0.912581379 | -5.625721247 |
| 1455381_at   | -0.010397475 | 8.068296494 | -0.11272346  | 0.912619519 | 0.912619519 | -5.625726629 |
| 1432919_at   | -0.009499559 | 3.15326389  | -0.112690021 | 0.912645319 | 0.912645319 | -5.625730269 |
| 1420821_at   | 0.024726462  | 6.216005681 | 0.112687592  | 0.912647192 | 0.912647192 | -5.625730533 |
| 1422922_at   | 0.010775454  | 5.5230696   | 0.112672976  | 0.91265847  | 0.91265847  | -5.625732124 |
| 1428000_at   | 0.007505918  | 9.03769175  | 0.112672106  | 0.912659141 | 0.912659141 | -5.625732218 |
| 1447532_at   | 0.007783503  | 4.760124717 | 0.112664834  | 0.912664752 | 0.912664752 | -5.62573301  |
| 1424144_at   | 0.009673931  | 8.989129944 | 0.112649275  | 0.912676756 | 0.912676756 | -5.625734702 |
| 1434446_at   | -0.009097036 | 7.899546406 | -0.112606827 | 0.912709507 | 0.912709507 | -5.62573932  |
| 1447640_s_at | -0.010908528 | 9.616035921 | -0.11255004  | 0.912753323 | 0.912753323 | -5.625745494 |
| 1439934_at   | -0.007345064 | 4.189684473 | -0.112549849 | 0.91275347  | 0.91275347  | -5.625745514 |
| 1427555_at   | -0.009674441 | 5.413395149 | -0.112508509 | 0.912785367 | 0.912785367 | -5.625750007 |
| 1457944_at   | 0.008968514  | 7.587820822 | 0.112498987  | 0.912792714 | 0.912792714 | -5.625751042 |
| 1433338_at   | -0.00750703  | 7.041600045 | -0.112476065 | 0.9128104   | 0.9128104   | -5.625753532 |
| 1451977_at   | -0.01108695  | 7.636865016 | -0.112450802 | 0.912829893 | 0.912829893 | -5.625756276 |
| 1432002_at   | -0.011262119 | 3.611405766 | -0.112433293 | 0.912843402 | 0.912843402 | -5.625758177 |
| 1431880_at   | 0.027057608  | 4.183162126 | 0.112401141  | 0.91286821  | 0.91286821  | -5.625761668 |
| 1433813_at   | 0.007011055  | 8.480390771 | 0.112362142  | 0.912898301 | 0.912898301 | -5.6257659   |
| 1456244_x_at | 0.023036198  | 9.011088225 | 0.112352521  | 0.912905725 | 0.912905725 | -5.625766944 |
| 1442683_at   | -0.009001781 | 7.565292007 | -0.112324884 | 0.912927048 | 0.912927048 | -5.625769943 |
| 1436771_x_at | 0.010503555  | 10.56707632 | 0.112234836  | 0.912996529 | 0.912996529 | -5.625779707 |
| 1429392_at   | -0.007779364 | 7.968660035 | -0.112176525 | 0.913041522 | 0.913041522 | -5.625786026 |
| 1423733_a_at | 0.010091057  | 8.838495702 | 0.112154982  | 0.913058145 | 0.913058145 | -5.62578836  |
| 1452208_at   | -0.009109123 | 8.872124472 | -0.1121336   | 0.913074643 | 0.913074643 | -5.625790675 |
| 1420227_at   | 0.010802011  | 3.544601728 | 0.112113414  | 0.91309022  | 0.91309022  | -5.625792861 |

|              |              |             |              |             |             |              |
|--------------|--------------|-------------|--------------|-------------|-------------|--------------|
| 1449813_at   | 0.008328099  | 8.157443876 | 0.112095107  | 0.913104345 | 0.913104345 | -5.625794843 |
| 1451399_at   | 0.00699893   | 9.833468775 | 0.112086438  | 0.913111034 | 0.913111034 | -5.625795782 |
| 1432793_at   | 0.013057698  | 4.832208186 | 0.112051453  | 0.913138029 | 0.913138029 | -5.625799568 |
| 1446056_at   | -0.00943002  | 4.535898031 | -0.111979554 | 0.913193508 | 0.913193508 | -5.625807346 |
| 1456547_at   | -0.014002486 | 8.032672333 | -0.111970605 | 0.913200413 | 0.913200413 | -5.625808314 |
| 1447597_at   | 0.011714188  | 3.362968199 | 0.111962946  | 0.913206324 | 0.913206324 | -5.625809142 |
| 1434846_at   | -0.008771218 | 8.16689074  | -0.111923554 | 0.913236719 | 0.913236719 | -5.625813401 |
| 1436646_at   | 0.010166245  | 3.579084111 | 0.111882679  | 0.913268259 | 0.913268259 | -5.625817818 |
| 1449819_at   | -0.019135707 | 4.616471123 | -0.111718278 | 0.913395118 | 0.913395118 | -5.625835569 |
| 1456041_at   | 0.013443735  | 7.24398109  | 0.111704003  | 0.913406133 | 0.913406133 | -5.62583711  |
| 1439439_x_at | 0.011024679  | 10.00091536 | 0.111698529  | 0.913410358 | 0.913410358 | -5.6258377   |
| 1439282_at   | -0.010043985 | 6.018633977 | -0.111680667 | 0.91342414  | 0.91342414  | -5.625839627 |
| 1458246_at   | 0.009945008  | 3.508941876 | 0.111674989  | 0.913428522 | 0.913428522 | -5.625840239 |
| 1418586_at   | -0.009265148 | 6.79461391  | -0.111639854 | 0.913455634 | 0.913455634 | -5.625844028 |
| 1454227_at   | -0.011162125 | 5.317269457 | -0.111620622 | 0.913470475 | 0.913470475 | -5.625846101 |
| 1440148_at   | 0.009390268  | 3.429897739 | 0.111614401  | 0.913475275 | 0.913475275 | -5.625846772 |
| 1426328_a_at | 0.019053742  | 4.560389264 | 0.111509014  | 0.913556598 | 0.913556598 | -5.625858127 |
| 1416084_at   | 0.010223012  | 8.565135655 | 0.111501679  | 0.913562259 | 0.913562259 | -5.625858917 |
| 1457774_at   | 0.012668356  | 5.743752291 | 0.111500497  | 0.913563171 | 0.913563171 | -5.625859044 |
| 1423715_a_at | -0.007464129 | 11.15451847 | -0.111484579 | 0.913575455 | 0.913575455 | -5.625860758 |
| 1459365_at   | -0.011187782 | 4.16105419  | -0.111470883 | 0.913586024 | 0.913586024 | -5.625862233 |
| 1442018_at   | 0.016577336  | 7.578855826 | 0.11145117   | 0.913601236 | 0.913601236 | -5.625864355 |
| 1430246_at   | -0.010860998 | 4.603942887 | -0.111429464 | 0.913617985 | 0.913617985 | -5.625866691 |
| 1460503_at   | -0.008686609 | 3.268373282 | -0.111418907 | 0.913626132 | 0.913626132 | -5.625867827 |
| 1455210_at   | -0.00925793  | 6.838921093 | -0.111409068 | 0.913633724 | 0.913633724 | -5.625868886 |
| 1443968_at   | -0.011822055 | 6.328426467 | -0.111391191 | 0.913647519 | 0.913647519 | -5.625870809 |
| 1416856_at   | -0.008644852 | 9.34697861  | -0.111367729 | 0.913665625 | 0.913665625 | -5.625873333 |
| 1458204_at   | -0.009032886 | 6.529911456 | -0.1112727   | 0.913738957 | 0.913738957 | -5.625883549 |
| 1454294_at   | -0.009255415 | 3.719526898 | -0.111180171 | 0.913810362 | 0.913810362 | -5.625893489 |
| 1421185_at   | -0.008659276 | 3.838455373 | -0.111113757 | 0.913861614 | 0.913861614 | -5.625900618 |
| 1416403_at   | -0.029155102 | 6.697687106 | -0.111113636 | 0.913861707 | 0.913861707 | -5.625900631 |
| 1458890_at   | 0.013814994  | 4.235149803 | 0.111107243  | 0.91386664  | 0.91386664  | -5.625901317 |
| 1452928_at   | -0.011353694 | 6.303319721 | -0.111103564 | 0.913869479 | 0.913869479 | -5.625901712 |
| 1425456_a_at | 0.011107819  | 8.223371061 | 0.111090195  | 0.913879797 | 0.913879797 | -5.625903146 |
| 1445510_at   | -0.009342584 | 4.26362521  | -0.111079727 | 0.913887875 | 0.913887875 | -5.625904269 |
| 1433863_at   | 0.009298591  | 6.092934648 | 0.111060342  | 0.913902834 | 0.913902834 | -5.625906349 |
| 1418202_a_at | 0.010026798  | 7.354461158 | 0.111039115  | 0.913919216 | 0.913919216 | -5.625908626 |
| 1429424_at   | -0.012610012 | 3.96219583  | -0.111014221 | 0.913938427 | 0.913938427 | -5.625911295 |
| 1429903_at   | 0.010208013  | 7.169771046 | 0.110984792  | 0.913961137 | 0.913961137 | -5.62591445  |
| 1422065_at   | -0.007278192 | 3.103135642 | -0.110972073 | 0.913970953 | 0.913970953 | -5.625915813 |
| 1438996_at   | -0.010927552 | 3.745439633 | -0.1109154   | 0.914014689 | 0.914014689 | -5.625921885 |
| 1428078_at   | 0.014552147  | 7.864401698 | 0.110904461  | 0.91402313  | 0.91402313  | -5.625923057 |
| 1451405_at   | -0.008219874 | 8.80190215  | -0.11086131  | 0.914056432 | 0.914056432 | -5.625927678 |
| 1455649_at   | -0.010880536 | 5.435142272 | -0.110842114 | 0.914071245 | 0.914071245 | -5.625929733 |
| 1437235_x_at | -0.00941331  | 6.870266415 | -0.110812005 | 0.914094482 | 0.914094482 | -5.625932956 |
| 1428225_s_at | -0.00706786  | 9.43458826  | -0.110799841 | 0.914103869 | 0.914103869 | -5.625934258 |
| 1442665_at   | 0.012130326  | 3.588534175 | 0.110798986  | 0.914104529 | 0.914104529 | -5.625934349 |
| 1445979_at   | 0.009406729  | 3.511087204 | 0.110746204  | 0.914145263 | 0.914145263 | -5.625939996 |
| 1454238_a_at | 0.010632901  | 3.603881454 | 0.110725078  | 0.914161567 | 0.914161567 | -5.625942256 |
| 1419931_at   | 0.0143102    | 4.188998178 | 0.110672046  | 0.914202495 | 0.914202495 | -5.625947925 |
| 1416869_x_at | 0.011930419  | 7.245979795 | 0.110645709  | 0.91422282  | 0.91422282  | -5.62595074  |
| 1439949_at   | 0.010516782  | 8.110506683 | 0.110644001  | 0.914224138 | 0.914224138 | -5.625950923 |
| 1434556_at   | 0.012132945  | 7.805553865 | 0.110632792  | 0.914232789 | 0.914232789 | -5.62595212  |

|              |              |             |              |             |             |              |
|--------------|--------------|-------------|--------------|-------------|-------------|--------------|
| 1455303_at   | 0.007808969  | 7.439451145 | 0.110619734  | 0.914242866 | 0.914242866 | -5.625953516 |
| 1458712_at   | -0.009277034 | 3.60516731  | -0.110591943 | 0.914264314 | 0.914264314 | -5.625956484 |
| 1425267_a_at | -0.009611092 | 7.363903623 | -0.110556896 | 0.914291362 | 0.914291362 | -5.625960227 |
| 1445682_at   | -0.013680101 | 4.162867072 | -0.110469151 | 0.91435908  | 0.91435908  | -5.625969593 |
| 1451291_at   | -0.007630542 | 7.538631204 | -0.110394232 | 0.9144169   | 0.9144169   | -5.625977583 |
| 1426131_at   | -0.009379322 | 5.883813552 | -0.110371241 | 0.914434644 | 0.914434644 | -5.625980034 |
| 1458144_at   | 0.014111655  | 4.907773782 | 0.110297882  | 0.914491261 | 0.914491261 | -5.625987851 |
| 1424955_at   | -0.007870452 | 9.877283303 | -0.110276393 | 0.914507846 | 0.914507846 | -5.62599014  |
| 1443492_at   | -0.007210424 | 3.577603031 | -0.110238845 | 0.914536825 | 0.914536825 | -5.625994139 |
| 1435263_at   | 0.008275513  | 5.332696731 | 0.110162901  | 0.914595438 | 0.914595438 | -5.626002222 |
| 1443836_x_at | -0.006778443 | 8.833740114 | -0.110160531 | 0.914597268 | 0.914597268 | -5.626002474 |
| 1425361_at   | -0.00769918  | 7.009906494 | -0.110124771 | 0.914624867 | 0.914624867 | -5.626006278 |
| 1458778_at   | 0.009191067  | 3.829387981 | 0.110108698  | 0.914637272 | 0.914637272 | -5.626007987 |
| 1444949_at   | 0.011704919  | 3.661882276 | 0.109983058  | 0.914734242 | 0.914734242 | -5.626021341 |
| 1456510_x_at | 0.012578222  | 6.47705038  | 0.109891933  | 0.914804574 | 0.914804574 | -5.626031017 |
| 1418883_a_at | 0.007206877  | 13.3137438  | 0.109875422  | 0.914817317 | 0.914817317 | -5.626032769 |
| 1454748_at   | 0.010596207  | 6.435949704 | 0.109871198  | 0.914820578 | 0.914820578 | -5.626033217 |
| 1449075_at   | 0.008807015  | 8.126034109 | 0.109806244  | 0.914870711 | 0.914870711 | -5.626040108 |
| 1438130_at   | -0.012532665 | 8.704927363 | -0.109782229 | 0.914889199 | 0.914889199 | -5.626042648 |
| 1431474_at   | 0.008936553  | 5.435562776 | 0.109775207  | 0.914894666 | 0.914894666 | -5.626043399 |
| 1445966_at   | 0.010719895  | 8.537845899 | 0.109703732  | 0.914949833 | 0.914949833 | -5.626050974 |
| 1418109_at   | 0.008226871  | 7.458381573 | 0.109692007  | 0.914958883 | 0.914958883 | -5.626052217 |
| 1431327_at   | 0.014806149  | 5.592166576 | 0.109681154  | 0.91496726  | 0.91496726  | -5.626053367 |
| 1437962_at   | -0.007390001 | 4.461845131 | -0.109681036 | 0.914967351 | 0.914967351 | -5.626053379 |
| 1443331_at   | -0.007168223 | 6.906814711 | -0.109667946 | 0.914977454 | 0.914977454 | -5.626054766 |
| 1425998_at   | 0.007604263  | 3.584510705 | 0.109667544  | 0.914977765 | 0.914977765 | -5.626054808 |
| 1424047_at   | 0.008806385  | 8.900195605 | 0.10959159   | 0.915036389 | 0.915036389 | -5.62606285  |
| 1434693_at   | 0.007134193  | 3.601084003 | 0.109580175  | 0.9150452   | 0.9150452   | -5.626064059 |
| 1435178_x_at | -0.006677268 | 11.66012796 | -0.109547542 | 0.915070388 | 0.915070388 | -5.626067512 |
| 1428752_at   | -0.010616123 | 5.63360526  | -0.109532459 | 0.91508203  | 0.91508203  | -5.626069108 |
| 1431754_at   | 0.013670774  | 4.371527367 | 0.109524443  | 0.915088217 | 0.915088217 | -5.626069956 |
| 1441746_at   | 0.028510461  | 4.460127709 | 0.10948538   | 0.915118368 | 0.915118368 | -5.626074087 |
| 1426494_at   | -0.011173822 | 7.309197726 | -0.109478618 | 0.915123587 | 0.915123587 | -5.626074802 |
| 1431763_a_at | 0.007602421  | 5.678532484 | 0.10938299   | 0.915197399 | 0.915197399 | -5.626084909 |
| 1448567_at   | 0.008987811  | 7.738110424 | 0.109375738  | 0.915202997 | 0.915202997 | -5.626085675 |
| 1435371_x_at | -0.009569696 | 3.550083189 | -0.109334216 | 0.915235046 | 0.915235046 | -5.626090061 |
| 1429016_at   | 0.007285672  | 5.030668725 | 0.109299616  | 0.915261753 | 0.915261753 | -5.626093714 |
| 1421534_at   | -0.011398302 | 8.914055344 | -0.10927149  | 0.915283463 | 0.915283463 | -5.626096683 |
| 1425640_at   | 0.012539263  | 4.380360096 | 0.109270277  | 0.9152844   | 0.9152844   | -5.626096811 |
| 1453287_at   | 0.009906518  | 4.235588752 | 0.109216099  | 0.915326219 | 0.915326219 | -5.626102527 |
| 1451098_at   | 0.010354016  | 8.503325757 | 0.109145246  | 0.915380909 | 0.915380909 | -5.626109999 |
| 1418083_at   | 0.009390774  | 8.957763579 | 0.10909302   | 0.915421222 | 0.915421222 | -5.626115503 |
| 1422508_at   | 0.014022966  | 9.425331357 | 0.109064108  | 0.915443539 | 0.915443539 | -5.626118549 |
| 1447031_at   | 0.006630656  | 6.944755855 | 0.109036777  | 0.915464636 | 0.915464636 | -5.626121427 |
| 1417400_at   | 0.007379402  | 10.88806241 | 0.108991278  | 0.915499757 | 0.915499757 | -5.626126218 |
| 1441388_at   | 0.031426795  | 5.605208872 | 0.108974582  | 0.915512645 | 0.915512645 | -5.626127975 |
| 1417916_a_at | -0.008825011 | 10.08470851 | -0.108969752 | 0.915516373 | 0.915516373 | -5.626128484 |
| 1460172_at   | 0.007656922  | 8.664987429 | 0.108955604  | 0.915527294 | 0.915527294 | -5.626129973 |
| 1445865_at   | 0.007148034  | 3.781754506 | 0.108926005  | 0.915550142 | 0.915550142 | -5.626133087 |
| 1425413_at   | 0.011178811  | 5.168075156 | 0.108872848  | 0.915591174 | 0.915591174 | -5.626138678 |
| 1424949_at   | -0.010292948 | 7.127639881 | -0.108868395 | 0.915594611 | 0.915594611 | -5.626139146 |
| 1416655_at   | -0.009707628 | 8.631814305 | -0.108850395 | 0.915608506 | 0.915608506 | -5.626141039 |
| 1425043_s_at | 0.008226029  | 6.178603858 | 0.108841789  | 0.915615149 | 0.915615149 | -5.626141944 |

|              |              |             |              |             |             |              |
|--------------|--------------|-------------|--------------|-------------|-------------|--------------|
| 1418728_at   | 0.010585772  | 4.274742695 | 0.10882032   | 0.915631721 | 0.915631721 | -5.6261442   |
| 1427815_at   | -0.018342244 | 5.389934378 | -0.108796405 | 0.915650182 | 0.915650182 | -5.626146714 |
| 1419696_at   | -0.007311814 | 6.113008768 | -0.108740548 | 0.9156933   | 0.9156933   | -5.626152582 |
| 1446976_at   | -0.009910897 | 3.624678719 | -0.108736252 | 0.915696616 | 0.915696616 | -5.626153033 |
| 1421171_at   | 0.010646208  | 7.498953407 | 0.108722902  | 0.915706921 | 0.915706921 | -5.626154435 |
| 1427467_a_at | 0.014385924  | 7.355691964 | 0.108698132  | 0.915726041 | 0.915726041 | -5.626157036 |
| 1446963_at   | 0.013204791  | 6.815958728 | 0.108660299  | 0.915755246 | 0.915755246 | -5.626161007 |
| 1419761_a_at | -0.010939875 | 7.290073218 | -0.108639209 | 0.915771527 | 0.915771527 | -5.62616322  |
| 1457988_at   | -0.010916394 | 8.671681136 | -0.10862943  | 0.915779075 | 0.915779075 | -5.626164246 |
| 1419962_at   | 0.011892669  | 3.446998924 | 0.108606414  | 0.915796843 | 0.915796843 | -5.626166661 |
| 1443033_at   | 0.01215276   | 6.498747116 | 0.108522503  | 0.915861617 | 0.915861617 | -5.62617546  |
| 1456122_at   | -0.00952526  | 5.87427427  | -0.108422467 | 0.91593884  | 0.91593884  | -5.62618594  |
| 1419285_s_at | 0.009812537  | 7.466226962 | 0.108405774  | 0.915951727 | 0.915951727 | -5.626187688 |
| 1442002_at   | -0.006899543 | 7.040681704 | -0.108385772 | 0.915967167 | 0.915967167 | -5.626189782 |
| 1449355_a_at | 0.010189389  | 8.088393606 | 0.108370664  | 0.91597883  | 0.91597883  | -5.626191364 |
| 1457991_at   | 0.011134358  | 5.996477891 | 0.108356432  | 0.915989817 | 0.915989817 | -5.626192853 |
| 1432609_at   | -0.008968434 | 4.212866711 | -0.108335203 | 0.916006205 | 0.916006205 | -5.626195075 |
| 1436294_at   | 0.013822258  | 4.840601326 | 0.108323039  | 0.916015595 | 0.916015595 | -5.626196348 |
| 1419041_at   | 0.006875379  | 9.578229239 | 0.10830535   | 0.91602925  | 0.91602925  | -5.626198198 |
| 1416836_at   | 0.009833227  | 8.93006585  | 0.108238668  | 0.916080727 | 0.916080727 | -5.626205171 |
| 1441760_at   | -0.00807293  | 3.47969864  | -0.108200338 | 0.916110317 | 0.916110317 | -5.626209178 |
| 1454914_at   | -0.008320486 | 9.798821272 | -0.108192106 | 0.916116672 | 0.916116672 | -5.626210038 |
| 1446394_at   | 0.010586836  | 4.050733532 | 0.108186081  | 0.916121323 | 0.916121323 | -5.626210668 |
| 1459525_at   | 0.007655806  | 5.177432509 | 0.108181769  | 0.916124652 | 0.916124652 | -5.626211118 |
| 1436620_at   | -0.007418351 | 4.796405087 | -0.108178066 | 0.91612751  | 0.91612751  | -5.626211505 |
| 1421999_at   | -0.012465009 | 3.887126585 | -0.108171446 | 0.916132621 | 0.916132621 | -5.626212197 |
| 1450471_at   | 0.018199309  | 6.367472883 | 0.108150101  | 0.916149099 | 0.916149099 | -5.626214427 |
| 1444642_at   | -0.008377356 | 5.653406906 | -0.10811896  | 0.916173139 | 0.916173139 | -5.626217679 |
| 1442529_at   | 0.013424576  | 3.93430517  | 0.108118161  | 0.916173756 | 0.916173756 | -5.626217763 |
| 1427719_s_at | 0.007561194  | 3.743739665 | 0.108083297  | 0.916200671 | 0.916200671 | -5.626221403 |
| 1445817_at   | -0.010254747 | 3.903979311 | -0.108064502 | 0.91621518  | 0.91621518  | -5.626223365 |
| 1456175_a_at | 0.014461636  | 10.4478261  | 0.108028507  | 0.916242968 | 0.916242968 | -5.626227121 |
| 1423769_at   | 0.007871926  | 7.990024236 | 0.107984997  | 0.916276558 | 0.916276558 | -5.62623166  |
| 1418141_at   | 0.02287216   | 7.180097893 | 0.107966264  | 0.916291019 | 0.916291019 | -5.626233614 |
| 1426187_a_at | -0.007574813 | 9.453216064 | -0.107898828 | 0.916343081 | 0.916343081 | -5.626240644 |
| 1418190_at   | -0.013407929 | 5.15528093  | -0.107792837 | 0.916424907 | 0.916424907 | -5.626251685 |
| 1436124_at   | -0.008909696 | 6.30013539  | -0.107744822 | 0.916461975 | 0.916461975 | -5.626256683 |
| 1430256_at   | 0.009081887  | 6.005103526 | 0.107713439  | 0.916486204 | 0.916486204 | -5.626259948 |
| 1428649_at   | -0.008354112 | 6.816193187 | -0.107676882 | 0.916514426 | 0.916514426 | -5.626263751 |
| 1454318_at   | 0.008716829  | 4.607860872 | 0.107666171  | 0.916522696 | 0.916522696 | -5.626264865 |
| 1423951_at   | 0.008096714  | 8.186257331 | 0.107660809  | 0.916526835 | 0.916526835 | -5.626265422 |
| 1458950_at   | -0.007713565 | 4.150486588 | -0.107642742 | 0.916540784 | 0.916540784 | -5.626267301 |
| 1451704_at   | -0.007081563 | 3.601734014 | -0.107624979 | 0.916554497 | 0.916554497 | -5.626269147 |
| 1436955_at   | 0.007178484  | 7.100249557 | 0.107610827  | 0.916565423 | 0.916565423 | -5.626270619 |
| 1429263_at   | 0.010623682  | 3.685593272 | 0.107527936  | 0.916629418 | 0.916629418 | -5.626279231 |
| 1416431_at   | -0.012289865 | 9.080156189 | -0.107518951 | 0.916636355 | 0.916636355 | -5.626280164 |
| 1437642_at   | -0.007289689 | 6.772824127 | -0.107500582 | 0.916650536 | 0.916650536 | -5.626282071 |
| 1429928_at   | 0.014964634  | 4.563591638 | 0.107500121  | 0.916650892 | 0.916650892 | -5.626282119 |
| 1437203_at   | 0.013141235  | 8.023308565 | 0.107475473  | 0.916669922 | 0.916669922 | -5.626284678 |
| 1415679_at   | 0.009118434  | 10.57724316 | 0.107473222  | 0.91667166  | 0.91667166  | -5.626284912 |
| 1434903_s_at | -0.008432685 | 6.312138929 | -0.107468745 | 0.916675116 | 0.916675116 | -5.626285377 |
| 1441415_at   | -0.010048676 | 7.2952372   | -0.107412789 | 0.916718317 | 0.916718317 | -5.626291184 |
| 1417361_at   | 0.008144137  | 8.032284077 | 0.10737758   | 0.9167455   | 0.9167455   | -5.626294836 |



|              |              |             |              |             |             |              |
|--------------|--------------|-------------|--------------|-------------|-------------|--------------|
| 1421530_a_at | 0.009674139  | 3.757480567 | 0.107345083  | 0.916770589 | 0.916770589 | -5.626298206 |
| 1432303_at   | -0.010115762 | 4.087946104 | -0.107326808 | 0.916784698 | 0.916784698 | -5.6263001   |
| 1456964_at   | 0.008037529  | 7.487694978 | 0.107325732  | 0.91678553  | 0.91678553  | -5.626300212 |
| 1433849_at   | 0.008440085  | 7.06694972  | 0.107317682  | 0.916791745 | 0.916791745 | -5.626301046 |
| 1448793_a_at | 0.067573726  | 8.551384191 | 0.107253073  | 0.916841627 | 0.916841627 | -5.626307742 |
| 1428215_x_at | -0.007454534 | 9.699525691 | -0.107247408 | 0.916846001 | 0.916846001 | -5.626308328 |
| 1428758_at   | -0.009600776 | 7.954174831 | -0.107193105 | 0.916887926 | 0.916887926 | -5.626313952 |
| 1449941_at   | -0.008618225 | 4.495446856 | -0.107187861 | 0.916891975 | 0.916891975 | -5.626314495 |
| 1450583_s_at | -0.008675455 | 3.873308236 | -0.10716342  | 0.916910846 | 0.916910846 | -5.626317025 |
| 1432068_a_at | 0.012992492  | 4.346536334 | 0.107131777  | 0.916935276 | 0.916935276 | -5.6263203   |
| 1451803_a_at | -0.012508619 | 8.23376122  | -0.107116795 | 0.916946843 | 0.916946843 | -5.62632185  |
| 1426097_a_at | -0.012088598 | 7.583532313 | -0.10711509  | 0.91694816  | 0.91694816  | -5.626322027 |
| 1417220_at   | 0.009667655  | 6.23015554  | 0.107096187  | 0.916962755 | 0.916962755 | -5.626323982 |
| 1431168_at   | -0.012377219 | 3.839354373 | -0.107077773 | 0.916976972 | 0.916976972 | -5.626325887 |
| 1431779_at   | 0.009777145  | 3.69712084  | 0.107074869  | 0.916979214 | 0.916979214 | -5.626326187 |
| 1445621_at   | -0.019385089 | 3.215485324 | -0.107049371 | 0.9169989   | 0.9169989   | -5.626328824 |
| 1417080_a_at | 0.010187747  | 7.421164274 | 0.107045408  | 0.91700196  | 0.91700196  | -5.626329234 |
| 1418416_x_at | -0.01672357  | 6.559094426 | -0.107025034 | 0.917017691 | 0.917017691 | -5.62633134  |
| 1436485_s_at | 0.01770662   | 4.238536142 | 0.106965961  | 0.9170633   | 0.9170633   | -5.626337445 |
| 1444134_at   | -0.010497539 | 5.59025372  | -0.10693974  | 0.917083545 | 0.917083545 | -5.626340154 |
| 1448598_at   | -0.00729412  | 5.545157974 | -0.106935919 | 0.917086496 | 0.917086496 | -5.626340549 |
| 1451297_at   | -0.009220015 | 3.574678004 | -0.106929612 | 0.917091365 | 0.917091365 | -5.6263412   |
| 1458631_at   | 0.00908987   | 4.133324438 | 0.106914414  | 0.917103099 | 0.917103099 | -5.626342769 |
| 1419920_s_at | 0.006773813  | 9.841622754 | 0.106912163  | 0.917104837 | 0.917104837 | -5.626343002 |
| 1432895_at   | -0.00979358  | 3.680812573 | -0.106909234 | 0.917107099 | 0.917107099 | -5.626343304 |
| 1457297_at   | 0.014779848  | 7.889721797 | 0.106868643  | 0.917138439 | 0.917138439 | -5.626347495 |
| 1457221_at   | 0.011471776  | 3.744896287 | 0.106778198  | 0.917208272 | 0.917208272 | -5.626356827 |
| 1451662_x_at | 0.007974007  | 4.063030283 | 0.106742643  | 0.917235724 | 0.917235724 | -5.626360494 |
| 1439695_a_at | -0.009335678 | 8.106735165 | -0.106733741 | 0.917242598 | 0.917242598 | -5.626361412 |
| 1428419_at   | 0.007848073  | 6.627585218 | 0.106699854  | 0.917268763 | 0.917268763 | -5.626364905 |
| 1431356_at   | -0.009276779 | 3.254189384 | -0.106678904 | 0.917284939 | 0.917284939 | -5.626367064 |
| 1420876_a_at | -0.012102272 | 6.933363559 | -0.106658094 | 0.917301006 | 0.917301006 | -5.626369208 |
| 1447997_s_at | 0.007493075  | 3.05637576  | 0.10662618   | 0.917325648 | 0.917325648 | -5.626372495 |
| 1446064_at   | -0.011342291 | 3.617804736 | -0.106622332 | 0.917328619 | 0.917328619 | -5.626372891 |
| 1423576_a_at | -0.008548042 | 3.945470271 | -0.106592469 | 0.917351677 | 0.917351677 | -5.626375966 |
| 1421258_a_at | -0.012079566 | 5.003812825 | -0.106549045 | 0.917385206 | 0.917385206 | -5.626380436 |
| 1450104_at   | 0.007242035  | 7.940578882 | 0.106479012  | 0.917439281 | 0.917439281 | -5.626387641 |
| 1437380_x_at | 0.008009536  | 10.58268447 | 0.106443557  | 0.917466657 | 0.917466657 | -5.626391287 |
| 1426267_at   | 0.009274091  | 3.621834829 | 0.106433338  | 0.917474547 | 0.917474547 | -5.626392338 |
| 1447520_at   | 0.011250795  | 4.504349972 | 0.106427339  | 0.917479179 | 0.917479179 | -5.626392955 |
| 1443901_at   | -0.009371237 | 4.927748898 | -0.106359425 | 0.917531619 | 0.917531619 | -5.626399934 |
| 1433520_at   | 0.008067938  | 9.327587026 | 0.106326668  | 0.917556912 | 0.917556912 | -5.626403299 |
| 1457391_at   | -0.010641571 | 4.029488391 | -0.106306459 | 0.917572516 | 0.917572516 | -5.626405374 |
| 1434859_at   | 0.009843624  | 8.604102952 | 0.106239221  | 0.917624434 | 0.917624434 | -5.626412276 |
| 1430400_at   | 0.008135777  | 3.213532336 | 0.106231432  | 0.917630449 | 0.917630449 | -5.626413075 |
| 1442639_at   | 0.008826917  | 5.159920679 | 0.106219472  | 0.917639684 | 0.917639684 | -5.626414302 |
| 1432948_at   | -0.007727312 | 3.586016912 | -0.106186422 | 0.917665204 | 0.917665204 | -5.626417693 |
| 1434329_s_at | 0.009500924  | 9.523465158 | 0.106171853  | 0.917676454 | 0.917676454 | -5.626419187 |
| 1416993_at   | 0.007090954  | 8.525137631 | 0.106160877  | 0.917684929 | 0.917684929 | -5.626420313 |
| 1445399_at   | 0.009761571  | 3.484026076 | 0.10608944   | 0.91774009  | 0.91774009  | -5.626427635 |
| 1437101_at   | -0.00886548  | 7.338385009 | -0.106086891 | 0.917742059 | 0.917742059 | -5.626427897 |
| 1450156_a_at | -0.010003226 | 7.982224244 | -0.106060231 | 0.917762645 | 0.917762645 | -5.626430628 |
| 1421924_at   | -0.014343253 | 5.11485111  | -0.106056052 | 0.917765871 | 0.917765871 | -5.626431056 |

|              |              |              |              |             |             |              |
|--------------|--------------|--------------|--------------|-------------|-------------|--------------|
| 1439740_s_at | 0.014282578  | 8.829323888  | 0.106054828  | 0.917766816 | 0.917766816 | -5.626431182 |
| 1455993_at   | -0.012569912 | 8.456429723  | -0.105979088 | 0.917825301 | 0.917825301 | -5.626438938 |
| 1433333_at   | 0.006638321  | 4.513441017  | 0.105974658  | 0.917828722 | 0.917828722 | -5.626439391 |
| 1415813_at   | 0.007029161  | 10.2235268   | 0.105951416  | 0.917846669 | 0.917846669 | -5.62644177  |
| 1432974_at   | 0.0080433    | 5.110644229  | 0.105950535  | 0.91784735  | 0.91784735  | -5.62644186  |
| 1430550_at   | 0.01092447   | 3.379987732  | 0.105932255  | 0.917861465 | 0.917861465 | -5.626443731 |
| 1450633_at   | -0.00860226  | 4.702567128  | -0.105875153 | 0.917905559 | 0.917905559 | -5.626449572 |
| 1415896_x_at | 0.007330529  | 10.09363381  | 0.105785644  | 0.917974677 | 0.917974677 | -5.626458722 |
| 1447340_at   | -0.009228109 | 4.013173246  | -0.105701402 | 0.918039729 | 0.918039729 | -5.626467327 |
| 1417947_at   | 0.006449206  | 12.3746314   | 0.105691158  | 0.91804764  | 0.91804764  | -5.626468372 |
| 1440074_at   | 0.006879457  | 3.624302089  | 0.105581299  | 0.918132474 | 0.918132474 | -5.626479582 |
| 1454115_at   | 0.008135485  | 3.37331073   | 0.105509541  | 0.918187887 | 0.918187887 | -5.626486898 |
| 1460496_at   | -0.010019636 | 4.108406817  | -0.105509193 | 0.918188156 | 0.918188156 | -5.626486933 |
| 1416624_a_at | -0.006441602 | 14.2804908   | -0.10550564  | 0.9181909   | 0.9181909   | -5.626487295 |
| 1453962_at   | 0.011371516  | 4.074469563  | 0.105498905  | 0.9181961   | 0.9181961   | -5.626487982 |
| 1458107_at   | -0.006725336 | 4.248477964  | -0.105397661 | 0.918274284 | 0.918274284 | -5.626498294 |
| 1448664_a_at | 0.018366248  | 7.368026041  | 0.105373802  | 0.918292709 | 0.918292709 | -5.626500723 |
| 1431028_a_at | 0.01172757   | 7.504332757  | 0.105309231  | 0.918342574 | 0.918342574 | -5.626507293 |
| 1453460_at   | 0.012323285  | 4.627652215  | 0.105305487  | 0.918345464 | 0.918345464 | -5.626507674 |
| 1425146_at   | 0.008675976  | 6.154710805  | 0.105270809  | 0.918372244 | 0.918372244 | -5.626511201 |
| 1456864_at   | 0.013209915  | 7.389779743  | 0.105250044  | 0.91838828  | 0.91838828  | -5.626513312 |
| 1425820_x_at | 0.007078879  | 7.739125969  | 0.105132005  | 0.918479436 | 0.918479436 | -5.626525306 |
| 1436376_s_at | 0.008735356  | 8.05681935   | 0.105115784  | 0.918491963 | 0.918491963 | -5.626526953 |
| 1420480_at   | 0.011638965  | 6.536177887  | 0.105114523  | 0.918492937 | 0.918492937 | -5.626527081 |
| 1420179_at   | -0.007219707 | 3.456222486  | -0.105088481 | 0.918513048 | 0.918513048 | -5.626529725 |
| 1460008_x_at | 0.006444273  | 13.78936632  | 0.105001875  | 0.918579931 | 0.918579931 | -5.626538512 |
| 1418642_at   | 0.008567102  | 4.357186439  | 0.104951968  | 0.918618472 | 0.918618472 | -5.626543573 |
| 1430730_at   | -0.009819562 | 4.018692     | -0.104927358 | 0.918637478 | 0.918637478 | -5.626546068 |
| 1434225_at   | -0.009119818 | 9.16486824   | -0.104922594 | 0.918641157 | 0.918641157 | -5.626546551 |
| 1454916_s_at | -0.009374683 | 9.639508042  | -0.104912226 | 0.918649165 | 0.918649165 | -5.626547601 |
| 1454397_at   | -0.008377631 | 6.379323095  | -0.104900087 | 0.918658539 | 0.918658539 | -5.626548831 |
| 1429202_at   | 0.006362452  | 6.360712232  | 0.10488373   | 0.918671171 | 0.918671171 | -5.626550489 |
| 1430474_a_at | -0.006699131 | 10.13444652  | -0.10476412  | 0.918763544 | 0.918763544 | -5.6265626   |
| 1425865_a_at | 0.007939273  | 7.284564596  | 0.104744152  | 0.918778966 | 0.918778966 | -5.62656462  |
| 1448730_at   | 0.023518441  | 7.000556395  | 0.104731851  | 0.918788466 | 0.918788466 | -5.626565865 |
| 1452655_at   | -0.008090073 | 5.502045557  | -0.104654205 | 0.918848431 | 0.918848431 | -5.626573717 |
| 1436958_x_at | -0.008679555 | 9.127795187  | -0.1046438   | 0.918856467 | 0.918856467 | -5.626574769 |
| 1435671_at   | -0.012857127 | 5.926892976  | -0.104618981 | 0.918875635 | 0.918875635 | -5.626577277 |
| 1438579_at   | 0.006622589  | 6.638638422  | 0.104612533  | 0.918880615 | 0.918880615 | -5.626577929 |
| 1424454_at   | 0.022996627  | 8.234692908  | 0.104555493  | 0.918924667 | 0.918924667 | -5.626583691 |
| 1417618_at   | -0.011597891 | 4.266309473  | -0.104502785 | 0.918965374 | 0.918965374 | -5.626589013 |
| 1431884_at   | -0.008537483 | 4.561367828  | -0.104498997 | 0.918968299 | 0.918968299 | -5.626589395 |
| 1444566_at   | -0.007530849 | 5.286389019  | -0.10448886  | 0.918976129 | 0.918976129 | -5.626590419 |
| 1426806_at   | -0.008294992 | 6.291508796  | -0.104402732 | 0.919042647 | 0.919042647 | -5.626599108 |
| 1420612_s_at | -0.007396929 | 9.286478714  | -0.104370086 | 0.91906786  | 0.91906786  | -5.6266024   |
| 1423884_at   | -0.007230336 | 9.703208112  | -0.104338141 | 0.919092532 | 0.919092532 | -5.62660562  |
| 1449679_s_at | -0.007786843 | 10.569655535 | -0.104327176 | 0.919101001 | 0.919101001 | -5.626606725 |
| 1438291_x_at | 0.010769875  | 9.128327236  | 0.104326475  | 0.919101542 | 0.919101542 | -5.626606796 |
| 1419426_s_at | 0.011144099  | 9.272942696  | 0.104255127  | 0.919156647 | 0.919156647 | -5.626613983 |
| 1431018_at   | 0.00834589   | 6.916658727  | 0.10416344   | 0.91922746  | 0.91922746  | -5.626623213 |
| 1436943_at   | 0.014934098  | 4.401869948  | 0.104130415  | 0.919252967 | 0.919252967 | -5.626626535 |
| 1430728_at   | 0.009015472  | 4.19761258   | 0.104127909  | 0.919254902 | 0.919254902 | -5.626626787 |
| 1451196_at   | -0.007412816 | 8.582637507  | -0.104031731 | 0.919329186 | 0.919329186 | -5.626636457 |

|                 |              |             |              |             |             |              |
|-----------------|--------------|-------------|--------------|-------------|-------------|--------------|
| 1441818_at      | -0.007023091 | 3.567491894 | -0.104015956 | 0.91934137  | 0.91934137  | -5.626638042 |
| 1458979_at      | -0.009230395 | 3.832181304 | -0.104013084 | 0.919343588 | 0.919343588 | -5.62663833  |
| AFFX-TrpnX-3_at | 0.007545835  | 3.163362569 | 0.104009077  | 0.919346683 | 0.919346683 | -5.626638733 |
| 1427650_a_at    | 0.01003527   | 6.510111881 | 0.104008196  | 0.919347363 | 0.919347363 | -5.626638822 |
| 1450372_a_at    | 0.007189077  | 13.08391018 | 0.104004096  | 0.91935053  | 0.91935053  | -5.626639233 |
| 1455460_at      | -0.007603562 | 3.28136888  | -0.103940133 | 0.919399932 | 0.919399932 | -5.626645657 |
| 1440466_at      | 0.008243177  | 5.813756554 | 0.103933989  | 0.919404678 | 0.919404678 | -5.626646274 |
| 1421129_a_at    | -0.011741502 | 6.086941772 | -0.103932873 | 0.91940554  | 0.91940554  | -5.626646386 |
| 1423562_at      | -0.009481052 | 6.198859449 | -0.103824059 | 0.919489585 | 0.919489585 | -5.626657305 |
| 1450611_at      | -0.00820301  | 3.717417773 | -0.103784577 | 0.91952008  | 0.91952008  | -5.626661264 |
| 1447502_at      | -0.007344949 | 3.130375298 | -0.103725439 | 0.919565757 | 0.919565757 | -5.626667191 |
| 1423230_at      | -0.007393613 | 6.509553368 | -0.103693071 | 0.919590757 | 0.919590757 | -5.626670434 |
| 1432511_s_at    | 0.00907371   | 5.271863009 | 0.103689665  | 0.919593388 | 0.919593388 | -5.626670775 |
| 1454701_at      | -0.014646215 | 6.826991594 | -0.103656066 | 0.91961934  | 0.91961934  | -5.62667414  |
| 1450149_a_at    | 0.007977328  | 12.43636144 | 0.103641297  | 0.919630747 | 0.919630747 | -5.626675619 |
| 1418949_at      | 0.011343199  | 5.766515706 | 0.10362223   | 0.919645474 | 0.919645474 | -5.626677527 |
| 1434152_at      | -0.009606278 | 3.584860519 | -0.10359361  | 0.91966758  | 0.91966758  | -5.626680392 |
| 1457961_at      | 0.01191795   | 4.099760477 | 0.103589689  | 0.919670609 | 0.919670609 | -5.626680784 |
| 1459829_x_at    | 0.007264341  | 3.493052194 | 0.103589525  | 0.919670735 | 0.919670735 | -5.6266808   |
| 1452183_a_at    | -0.018230199 | 12.58248715 | -0.10357743  | 0.919680077 | 0.919680077 | -5.626682011 |
| 1433496_at      | -0.009461431 | 8.85856778  | -0.103570422 | 0.91968549  | 0.91968549  | -5.626682712 |
| 1430438_at      | -0.016098956 | 5.767496393 | -0.103529352 | 0.919717212 | 0.919717212 | -5.62668682  |
| 1456240_x_at    | 0.0128878    | 8.236695149 | 0.103455501  | 0.919774256 | 0.919774256 | -5.626694203 |
| 1429681_a_at    | 0.006257317  | 11.03287615 | 0.103445895  | 0.919781675 | 0.919781675 | -5.626695163 |
| 1459265_at      | 0.008356581  | 4.76513818  | 0.103413871  | 0.919806411 | 0.919806411 | -5.626698362 |
| 1443892_at      | -0.008469977 | 3.601761971 | -0.103405896 | 0.919812571 | 0.919812571 | -5.626699159 |
| 1434912_at      | -0.010128838 | 3.414314919 | -0.10340044  | 0.919816785 | 0.919816785 | -5.626699704 |
| 1435794_at      | 0.008484036  | 7.337824257 | 0.103380533  | 0.919832162 | 0.919832162 | -5.626701692 |
| 1427560_at      | 0.00794436   | 8.185574715 | 0.103358851  | 0.919848909 | 0.919848909 | -5.626703857 |
| 1434996_at      | -0.013477354 | 6.932996966 | -0.103296058 | 0.919897412 | 0.919897412 | -5.626710125 |
| 1450785_at      | 0.012184213  | 4.509785019 | 0.103293986  | 0.919899012 | 0.919899012 | -5.626710331 |
| 1447959_at      | -0.013173958 | 4.557456349 | -0.103253639 | 0.919930177 | 0.919930177 | -5.626714357 |
| 1447544_at      | -0.007302973 | 6.692495887 | -0.103206437 | 0.919966637 | 0.919966637 | -5.626719063 |
| 1452096_s_at    | 0.008543236  | 8.4622187   | 0.103193569  | 0.919976577 | 0.919976577 | -5.626720346 |
| 1445898_at      | -0.010092172 | 5.345610896 | -0.103153973 | 0.920007162 | 0.920007162 | -5.626724293 |
| 1441962_at      | 0.00629313   | 6.491391556 | 0.103135998  | 0.920021047 | 0.920021047 | -5.626726084 |
| 1439761_x_at    | -0.007778552 | 3.77527958  | -0.103117183 | 0.92003558  | 0.92003558  | -5.626727958 |
| 1418549_at      | -0.009784717 | 4.979601582 | -0.10309061  | 0.920056106 | 0.920056106 | -5.626730604 |
| 1456023_at      | 0.007689595  | 7.008307055 | 0.103068491  | 0.920073192 | 0.920073192 | -5.626732807 |
| 1429801_at      | 0.010751511  | 4.554879335 | 0.103064971  | 0.92007591  | 0.92007591  | -5.626733157 |
| 1453264_at      | -0.012001027 | 6.291850674 | -0.10306349  | 0.920077055 | 0.920077055 | -5.626733305 |
| 1424653_at      | -0.00656726  | 6.851474161 | -0.103063443 | 0.920077091 | 0.920077091 | -5.62673331  |
| 1459019_at      | -0.007005348 | 4.506750993 | -0.103057302 | 0.920081834 | 0.920081834 | -5.626733921 |
| 1417525_at      | -0.008159448 | 5.405175921 | -0.102883762 | 0.920215885 | 0.920215885 | -5.626751183 |
| 1438681_at      | 0.007945423  | 7.279540471 | 0.102881375  | 0.920217729 | 0.920217729 | -5.62675142  |
| 1447268_at      | -0.012167549 | 4.170618774 | -0.102863082 | 0.92023186  | 0.92023186  | -5.626753238 |
| 1453571_at      | 0.012390661  | 7.257668703 | 0.102853766  | 0.920239056 | 0.920239056 | -5.626754163 |
| 1433829_a_at    | 0.013696234  | 11.71830704 | 0.102847631  | 0.920243795 | 0.920243795 | -5.626754773 |
| 1420846_at      | -0.008219066 | 8.985699258 | -0.102815651 | 0.920268498 | 0.920268498 | -5.62675795  |
| 1442525_at      | -0.010395857 | 6.012997037 | -0.102793776 | 0.920285396 | 0.920285396 | -5.626760122 |
| 1453972_x_at    | -0.008421843 | 5.48937044  | -0.102770497 | 0.920303379 | 0.920303379 | -5.626762433 |
| 1421897_at      | -0.008790782 | 6.004860091 | -0.102706823 | 0.920352565 | 0.920352565 | -5.626768753 |
| 1419557_a_at    | -0.007786994 | 8.363936392 | -0.102688872 | 0.920366432 | 0.920366432 | -5.626770534 |

|              |              |             |              |             |             |              |
|--------------|--------------|-------------|--------------|-------------|-------------|--------------|
| 1444409_at   | -0.012758239 | 6.23415343  | -0.102679637 | 0.920373565 | 0.920373565 | -5.62677145  |
| 1439298_at   | 0.008235183  | 7.634507144 | 0.102646342  | 0.920399285 | 0.920399285 | -5.626774752 |
| 1437910_at   | 0.01271072   | 8.632555272 | 0.102646016  | 0.920399537 | 0.920399537 | -5.626774784 |
| 1428938_at   | -0.006986783 | 8.49285771  | -0.10262378  | 0.920416713 | 0.920416713 | -5.626776988 |
| 1424051_at   | 0.01113973   | 10.3372914  | 0.102615715  | 0.920422943 | 0.920422943 | -5.626777788 |
| 1451125_at   | -0.006588544 | 9.906736311 | -0.102598082 | 0.920436565 | 0.920436565 | -5.626779536 |
| 1458467_at   | 0.012996413  | 4.054075722 | 0.102586052  | 0.920445857 | 0.920445857 | -5.626780728 |
| 1430692_a_at | 0.008526327  | 8.203081366 | 0.102506631  | 0.920507209 | 0.920507209 | -5.626788595 |
| 1431688_at   | -0.009110278 | 4.168830479 | -0.102500119 | 0.92051224  | 0.92051224  | -5.62678924  |
| 1425721_at   | -0.008450539 | 5.931242286 | -0.102490539 | 0.920519641 | 0.920519641 | -5.626790189 |
| 1416928_at   | -0.006637624 | 9.594506562 | -0.102474294 | 0.92053219  | 0.92053219  | -5.626791797 |
| 1415957_a_at | 0.007503084  | 9.09433483  | 0.102460035  | 0.920543204 | 0.920543204 | -5.626793208 |
| 1435370_a_at | -0.017239384 | 4.252496185 | -0.102445161 | 0.920554694 | 0.920554694 | -5.62679468  |
| 1439967_at   | 0.009066819  | 5.402992889 | 0.102443865  | 0.920555696 | 0.920555696 | -5.626794809 |
| 1417207_at   | -0.0111771   | 8.027042074 | -0.10234061  | 0.920635461 | 0.920635461 | -5.626805022 |
| 1444495_at   | -0.010375945 | 4.455311824 | -0.102339043 | 0.920636671 | 0.920636671 | -5.626805177 |
| 1429716_at   | 0.008129418  | 6.410204451 | 0.102334396  | 0.920640261 | 0.920640261 | -5.626805636 |
| 1450700_at   | -0.008271436 | 9.17923676  | -0.102286    | 0.920677647 | 0.920677647 | -5.626810419 |
| 1425290_at   | 0.007532003  | 4.096686717 | 0.102278911  | 0.920683124 | 0.920683124 | -5.62681112  |
| 1431446_at   | 0.010507799  | 5.605207084 | 0.102276973  | 0.920684621 | 0.920684621 | -5.626811311 |
| 1433546_at   | -0.007411305 | 9.694785879 | -0.102273379 | 0.920687397 | 0.920687397 | -5.626811666 |
| 1445352_at   | 0.011309951  | 3.358299684 | 0.102263223  | 0.920695243 | 0.920695243 | -5.62681267  |
| 1437345_a_at | 0.010830268  | 9.503527915 | 0.102248796  | 0.920706387 | 0.920706387 | -5.626814095 |
| 1460392_a_at | -0.00846674  | 9.705667941 | -0.102231513 | 0.920719739 | 0.920719739 | -5.626815802 |
| 1442436_at   | 0.00736805   | 3.519760681 | 0.102196172  | 0.92074704  | 0.92074704  | -5.626819291 |
| 1448811_at   | 0.006542652  | 9.525365038 | 0.102145085  | 0.920786506 | 0.920786506 | -5.626824333 |
| 1419442_at   | 0.014536834  | 7.876816141 | 0.102127398  | 0.92080017  | 0.92080017  | -5.626826078 |
| 1457990_at   | -0.014108333 | 3.519907782 | -0.102103608 | 0.920818548 | 0.920818548 | -5.626828425 |
| 1459746_at   | -0.011436338 | 6.768859232 | -0.102096714 | 0.920823874 | 0.920823874 | -5.626829105 |
| 1423378_at   | -0.011451442 | 5.668718607 | -0.102085346 | 0.920832656 | 0.920832656 | -5.626830226 |
| 1430395_at   | -0.009733956 | 5.237573847 | -0.102080452 | 0.920836437 | 0.920836437 | -5.626830709 |
| 1460517_at   | 0.007672323  | 4.020495787 | 0.102060069  | 0.920852183 | 0.920852183 | -5.626832719 |
| 1447643_x_at | 0.008527086  | 11.20327301 | 0.102015383  | 0.920886705 | 0.920886705 | -5.626837123 |
| 1430721_at   | -0.008532993 | 3.459342729 | -0.102010923 | 0.92089015  | 0.92089015  | -5.626837563 |
| 1419082_at   | 0.00889745   | 3.334129306 | 0.10200037   | 0.920898303 | 0.920898303 | -5.626838603 |
| 1431523_at   | 0.011804481  | 3.956427685 | 0.101988629  | 0.920907373 | 0.920907373 | -5.62683976  |
| 1422735_at   | 0.010318783  | 6.26945451  | 0.101976263  | 0.920916926 | 0.920916926 | -5.626840978 |
| 1443386_at   | -0.009602696 | 3.202306576 | -0.101951219 | 0.920936274 | 0.920936274 | -5.626843445 |
| 1456643_at   | -0.010919609 | 6.030381124 | -0.101929745 | 0.920952863 | 0.920952863 | -5.626845559 |
| 1435725_x_at | 0.006800883  | 13.16010325 | 0.101929269  | 0.920953231 | 0.920953231 | -5.626845606 |
| 1451099_at   | 0.00994888   | 8.555636508 | 0.101926436  | 0.920955419 | 0.920955419 | -5.626845885 |
| 1432700_at   | -0.008667809 | 3.527102487 | -0.101897885 | 0.920977477 | 0.920977477 | -5.626848696 |
| 1429629_at   | -0.009474712 | 4.029338366 | -0.101878288 | 0.920992616 | 0.920992616 | -5.626850625 |
| 1438645_x_at | -0.016580928 | 6.325960754 | -0.101825447 | 0.921033439 | 0.921033439 | -5.626855824 |
| 1421142_s_at | 0.014050751  | 7.613160497 | 0.101749696  | 0.92109196  | 0.92109196  | -5.626863272 |
| 1458110_at   | 0.008651579  | 6.530082214 | 0.101735891  | 0.921102625 | 0.921102625 | -5.626864629 |
| 1434319_at   | 0.010177874  | 4.157149343 | 0.101720897  | 0.921114209 | 0.921114209 | -5.626866103 |
| 1431726_a_at | 0.006268668  | 7.16990882  | 0.101700103  | 0.921130273 | 0.921130273 | -5.626868146 |
| 1420765_a_at | 0.010194239  | 3.541439496 | 0.101689531  | 0.921138441 | 0.921138441 | -5.626869184 |
| 1434267_at   | -0.008298747 | 8.773904963 | -0.101680833 | 0.92114516  | 0.92114516  | -5.626870039 |
| 1429835_at   | -0.011059954 | 3.773803454 | -0.101670336 | 0.921153271 | 0.921153271 | -5.62687107  |
| 1445293_at   | -0.008718724 | 4.510443453 | -0.101660446 | 0.921160911 | 0.921160911 | -5.626872041 |
| 1434893_at   | 0.010021998  | 4.002381832 | 0.1016354    | 0.921180261 | 0.921180261 | -5.626874501 |

|              |              |             |              |             |             |              |
|--------------|--------------|-------------|--------------|-------------|-------------|--------------|
| 1423856_at   | -0.008458017 | 4.418841033 | -0.101580797 | 0.921222445 | 0.921222445 | -5.62687986  |
| 1426520_at   | -0.013700913 | 4.166266045 | -0.101562637 | 0.921236475 | 0.921236475 | -5.626881642 |
| 1451614_a_at | -0.006383654 | 4.59636181  | -0.101552282 | 0.921244475 | 0.921244475 | -5.626882658 |
| 1442366_at   | 0.012468691  | 5.767659115 | 0.101506255  | 0.921280035 | 0.921280035 | -5.626887172 |
| 1456064_at   | 0.008480479  | 5.429810939 | 0.101478331  | 0.921301608 | 0.921301608 | -5.62688991  |
| 1424011_at   | 0.013070367  | 4.862077445 | 0.101422259  | 0.921344928 | 0.921344928 | -5.626895405 |
| 1445794_at   | 0.012767463  | 3.733835358 | 0.101419305  | 0.92134721  | 0.92134721  | -5.626895695 |
| 1455408_at   | 0.007337209  | 3.364617069 | 0.10140708   | 0.921356655 | 0.921356655 | -5.626896892 |
| 1422140_at   | -0.012938791 | 4.08256068  | -0.10134861  | 0.921401829 | 0.921401829 | -5.626902619 |
| 1448282_at   | 0.006620171  | 9.668059906 | 0.101343252  | 0.921405968 | 0.921405968 | -5.626903143 |
| 1457202_at   | -0.009481877 | 4.469311793 | -0.101325709 | 0.921419522 | 0.921419522 | -5.626904861 |
| 1453185_at   | 0.00937408   | 9.010729473 | 0.101313448  | 0.921428994 | 0.921428994 | -5.626906061 |
| 1440437_at   | 0.010697738  | 4.626978878 | 0.101301909  | 0.921437909 | 0.921437909 | -5.62690719  |
| 1423771_at   | 0.008199929  | 9.048985015 | 0.101271805  | 0.921461168 | 0.921461168 | -5.626910135 |
| 1435643_x_at | -0.006126478 | 13.91040146 | -0.101221625 | 0.921499937 | 0.921499937 | -5.626915043 |
| 1438960_at   | 0.007315525  | 3.486742374 | 0.101176112  | 0.921535101 | 0.921535101 | -5.626919493 |
| 1454932_at   | -0.006453025 | 8.41126307  | -0.101167179 | 0.921542002 | 0.921542002 | -5.626920366 |
| 1434496_at   | -0.011506185 | 6.050037497 | -0.101154142 | 0.921552075 | 0.921552075 | -5.62692164  |
| 1423285_at   | -0.027512201 | 5.07654574  | -0.101149126 | 0.92155595  | 0.92155595  | -5.62692213  |
| 1451097_at   | 0.010530556  | 9.248290926 | 0.101146833  | 0.921557721 | 0.921557721 | -5.626922354 |
| 1456057_x_at | 0.01326539   | 9.75968267  | 0.101128386  | 0.921571974 | 0.921571974 | -5.626924156 |
| 1454856_x_at | 0.006749085  | 13.05987372 | 0.101091533  | 0.921600447 | 0.921600447 | -5.626927756 |
| 1428577_at   | -0.010368383 | 5.444767934 | -0.101081172 | 0.921608452 | 0.921608452 | -5.626928768 |
| 1438601_at   | 0.007136278  | 8.220702166 | 0.101070782  | 0.921616479 | 0.921616479 | -5.626929782 |
| 1450508_at   | -0.007364225 | 4.457879206 | -0.101013374 | 0.921660834 | 0.921660834 | -5.626935386 |
| 1452918_at   | 0.008918838  | 9.255121869 | 0.100952397  | 0.921707946 | 0.921707946 | -5.626941335 |
| 1425461_at   | 0.01066431   | 7.31091513  | 0.100916261  | 0.921735866 | 0.921735866 | -5.626944858 |
| 1430509_at   | 0.007727241  | 3.623437461 | 0.100867254  | 0.92177373  | 0.92177373  | -5.626949635 |
| 1440020_at   | 0.009876764  | 8.027307853 | 0.100824166  | 0.921807022 | 0.921807022 | -5.626953832 |
| 1418437_a_at | -0.007223207 | 7.795052946 | -0.100810974 | 0.921817214 | 0.921817214 | -5.626955117 |
| 1424899_at   | 0.006892965  | 4.951482539 | 0.100795785  | 0.92182895  | 0.92182895  | -5.626956596 |
| 1459589_at   | 0.010900822  | 7.198190119 | 0.100781875  | 0.921839697 | 0.921839697 | -5.626957951 |
| 1437629_at   | -0.00992906  | 6.741978306 | -0.100675632 | 0.921921786 | 0.921921786 | -5.626968289 |
| 1425842_at   | 0.007611766  | 3.894084603 | 0.100663012  | 0.921931536 | 0.921931536 | -5.626969516 |
| 1453678_at   | 0.013285596  | 3.565146645 | 0.100654047  | 0.921938463 | 0.921938463 | -5.626970388 |
| 1428159_s_at | 0.007610771  | 11.32337658 | 0.100610787  | 0.921971888 | 0.921971888 | -5.626974594 |
| 1454417_at   | 0.013393691  | 3.885667516 | 0.100577606  | 0.921997526 | 0.921997526 | -5.626977818 |
| 1443663_at   | -0.010485472 | 6.564238412 | -0.100520224 | 0.922041862 | 0.922041862 | -5.626983392 |
| 1437505_at   | -0.010421523 | 7.261477214 | -0.100452531 | 0.922094167 | 0.922094167 | -5.626989963 |
| 1426501_a_at | -0.016255823 | 6.203246828 | -0.100443929 | 0.922100813 | 0.922100813 | -5.626990798 |
| 1455319_x_at | 0.00638541   | 13.0989064  | 0.100354626  | 0.922169815 | 0.922169815 | -5.626999459 |
| 1429922_at   | -0.01024096  | 3.628534765 | -0.100325657 | 0.922192199 | 0.922192199 | -5.627002268 |
| 1454827_at   | 0.012833737  | 6.526028361 | 0.100284397  | 0.922224079 | 0.922224079 | -5.627006266 |
| 1425999_at   | 0.006412954  | 3.559518738 | 0.100256565  | 0.922245585 | 0.922245585 | -5.627008962 |
| 1427875_a_at | 0.006499166  | 13.19319633 | 0.100253918  | 0.92224763  | 0.92224763  | -5.627009218 |
| 1456638_at   | -0.007034024 | 7.003713786 | -0.100235484 | 0.922261874 | 0.922261874 | -5.627011003 |
| 1431547_at   | 0.011667014  | 3.348469325 | 0.100188131  | 0.922298463 | 0.922298463 | -5.627015587 |
| 1426335_at   | 0.009316738  | 5.998130883 | 0.100164049  | 0.922317071 | 0.922317071 | -5.627017918 |
| 1449265_at   | 0.01076485   | 4.57917917  | 0.100155476  | 0.922323696 | 0.922323696 | -5.627018748 |
| 1441482_at   | -0.009168923 | 6.207629957 | -0.100133959 | 0.922340321 | 0.922340321 | -5.627020829 |
| 1428236_at   | 0.011028675  | 8.708897986 | 0.100111843  | 0.922357411 | 0.922357411 | -5.627022968 |
| 1449259_at   | 0.008510375  | 6.652696152 | 0.100074829  | 0.922386011 | 0.922386011 | -5.627026548 |
| 1449489_at   | 0.007628405  | 3.860684804 | 0.100034245  | 0.92241737  | 0.92241737  | -5.62703047  |

|              |              |             |              |             |             |              |
|--------------|--------------|-------------|--------------|-------------|-------------|--------------|
| 1423358_at   | -0.006524526 | 8.071011414 | -0.10000353  | 0.922441104 | 0.922441104 | -5.627033438 |
| 1427669_a_at | -0.007404738 | 5.647792164 | -0.099970915 | 0.922466306 | 0.922466306 | -5.627036588 |
| 1450907_at   | -0.009101975 | 10.81166068 | -0.09996228  | 0.922472979 | 0.922472979 | -5.627037422 |
| 1428543_at   | 0.011022322  | 6.340667814 | 0.09994602   | 0.922485542 | 0.922485542 | -5.627038992 |
| 1421734_at   | 0.007889732  | 4.287283781 | 0.099928212  | 0.922499303 | 0.922499303 | -5.627040712 |
| 1416332_at   | -0.009712904 | 7.513092055 | -0.099924068 | 0.922502505 | 0.922502505 | -5.627041112 |
| 1448472_at   | -0.011106537 | 8.87566969  | -0.099852646 | 0.922557694 | 0.922557694 | -5.627048004 |
| 1442466_a_at | -0.016745815 | 4.575981797 | -0.099803373 | 0.922595769 | 0.922595769 | -5.627052756 |
| 1424959_at   | 0.007760746  | 3.620179871 | 0.099763356  | 0.922626691 | 0.922626691 | -5.627056613 |
| 1459598_at   | 0.010212886  | 5.836065753 | 0.099736357  | 0.922647553 | 0.922647553 | -5.627059215 |
| 1416002_x_at | 0.008027259  | 7.971292603 | 0.099704425  | 0.922672229 | 0.922672229 | -5.627062291 |
| 1427647_at   | -0.007353283 | 4.005791759 | -0.099684757 | 0.922687427 | 0.922687427 | -5.627064186 |
| 1458088_at   | -0.007806111 | 5.345293897 | -0.09967451  | 0.922695345 | 0.922695345 | -5.627065172 |
| 1458802_at   | -0.014441949 | 5.080571029 | -0.099626728 | 0.922732268 | 0.922732268 | -5.627069772 |
| 1456428_at   | -0.00985731  | 4.490254078 | -0.099612245 | 0.922743459 | 0.922743459 | -5.627071166 |
| 1424004_x_at | 0.006305757  | 7.680256716 | 0.09957972   | 0.922768593 | 0.922768593 | -5.627074296 |
| 1418743_a_at | 0.007336427  | 4.032856596 | 0.099517992  | 0.922816293 | 0.922816293 | -5.627080232 |
| 1429292_a_at | 0.008295267  | 5.912610293 | 0.099509704  | 0.922822698 | 0.922822698 | -5.627081029 |
| 1416612_at   | 0.023933333  | 7.085388555 | 0.099491377  | 0.922836859 | 0.922836859 | -5.627082791 |
| 1455770_at   | -0.007313817 | 3.430040119 | -0.099465904 | 0.922856544 | 0.922856544 | -5.627085239 |
| 1430235_at   | -0.009909776 | 3.935028602 | -0.099441134 | 0.922875685 | 0.922875685 | -5.627087619 |
| 1448670_at   | 0.006403365  | 11.55304873 | 0.099388327  | 0.922916492 | 0.922916492 | -5.62709269  |
| 1426291_at   | 0.007601608  | 7.339971152 | 0.099330754  | 0.922960982 | 0.922960982 | -5.627098217 |
| 1433994_at   | -0.009802927 | 7.033141682 | -0.099324999 | 0.92296543  | 0.92296543  | -5.627098769 |
| 1435673_at   | -0.009194915 | 3.838851169 | -0.099311367 | 0.922975964 | 0.922975964 | -5.627100077 |
| 1457174_at   | 0.009148222  | 7.829950069 | 0.099275872  | 0.923003394 | 0.923003394 | -5.627103482 |
| 1450088_a_at | 0.006722958  | 3.438247494 | 0.099259472  | 0.923016067 | 0.923016067 | -5.627105054 |
| 1418226_at   | -0.006455601 | 8.041117158 | -0.099240438 | 0.923030776 | 0.923030776 | -5.62710688  |
| 1430170_at   | 0.008738038  | 5.463780702 | 0.099234635  | 0.92303526  | 0.92303526  | -5.627107436 |
| 1432318_at   | -0.010839908 | 4.099957227 | -0.099198169 | 0.92306344  | 0.92306344  | -5.627110931 |
| 1447295_at   | 0.007628279  | 6.344751514 | 0.099176427  | 0.923080242 | 0.923080242 | -5.627113014 |
| 1418611_at   | -0.007168772 | 6.504873299 | -0.099172029 | 0.92308364  | 0.92308364  | -5.627113436 |
| 1449442_at   | 0.006549532  | 7.755426271 | 0.099136519  | 0.923111082 | 0.923111082 | -5.627116837 |
| 1431875_a_at | -0.01146444  | 7.310160116 | -0.099119563 | 0.923124185 | 0.923124185 | -5.627118461 |
| 1435823_x_at | -0.007539403 | 8.362909692 | -0.099117504 | 0.923125776 | 0.923125776 | -5.627118658 |
| 1443015_at   | -0.00649097  | 3.590940357 | -0.099108926 | 0.923132405 | 0.923132405 | -5.62711948  |
| 1458670_at   | -0.009433085 | 3.569231959 | -0.099090346 | 0.923146763 | 0.923146763 | -5.627121259 |
| 1454173_at   | 0.008544122  | 3.863458981 | 0.099050557  | 0.923177512 | 0.923177512 | -5.627125067 |
| 1452696_a_at | -0.00907669  | 8.023927316 | -0.099013181 | 0.923206396 | 0.923206396 | -5.627128643 |
| 1427365_at   | -0.009385372 | 4.083529801 | -0.099009928 | 0.923208909 | 0.923208909 | -5.627128954 |
| 1422621_at   | -0.009065391 | 9.607567316 | -0.098902217 | 0.923292149 | 0.923292149 | -5.627139251 |
| 1450654_a_at | -0.007356897 | 7.815984648 | -0.098857099 | 0.923327016 | 0.923327016 | -5.627143561 |
| 1431823_at   | -0.00716068  | 5.129736695 | -0.098839736 | 0.923340434 | 0.923340434 | -5.627145219 |
| 1422107_at   | 0.008430426  | 4.724015347 | 0.098804998  | 0.92336728  | 0.92336728  | -5.627148536 |
| 1446786_at   | 0.006124765  | 6.34879788  | 0.098797558  | 0.92337303  | 0.92337303  | -5.627149246 |
| 1423304_a_at | 0.006487018  | 9.694745042 | 0.098785829  | 0.923382094 | 0.923382094 | -5.627150365 |
| 1446554_at   | 0.007375028  | 4.45800586  | 0.098744628  | 0.923413934 | 0.923413934 | -5.627154296 |
| 1447697_at   | -0.009989518 | 4.24756948  | -0.098696224 | 0.923451342 | 0.923451342 | -5.627158913 |
| 1427981_a_at | -0.008725096 | 8.606563038 | -0.098692016 | 0.923454594 | 0.923454594 | -5.627159314 |
| 1425590_s_at | -0.008038311 | 4.683561922 | -0.098622179 | 0.923508565 | 0.923508565 | -5.62716597  |
| 1454243_at   | -0.008969658 | 7.369567125 | -0.09859371  | 0.923530567 | 0.923530567 | -5.627168682 |
| 1426376_at   | 0.008256812  | 9.732718702 | 0.09858593   | 0.92353658  | 0.92353658  | -5.627169423 |
| 1451827_a_at | -0.010330354 | 6.452715973 | -0.098466365 | 0.923628983 | 0.923628983 | -5.627180804 |

|              |              |             |              |             |             |              |
|--------------|--------------|-------------|--------------|-------------|-------------|--------------|
| 1444511_at   | 0.012079731  | 4.385773907 | 0.098330796  | 0.923733757 | 0.923733757 | -5.627193692 |
| 1433687_at   | 0.006854175  | 7.162381026 | 0.098283598  | 0.923770234 | 0.923770234 | -5.627198175 |
| 1430475_at   | 0.009789411  | 3.811002385 | 0.098230396  | 0.923811351 | 0.923811351 | -5.627203225 |
| 1417091_at   | -0.009729412 | 8.86056065  | -0.098209337 | 0.923827627 | 0.923827627 | -5.627205223 |
| 1437830_x_at | 0.009327136  | 6.797226961 | 0.098207505  | 0.923829043 | 0.923829043 | -5.627205397 |
| 1443082_at   | 0.006513318  | 4.026418136 | 0.098168736  | 0.923859006 | 0.923859006 | -5.627209075 |
| 1448826_at   | -0.00986248  | 3.811101598 | -0.098140997 | 0.923880444 | 0.923880444 | -5.627211705 |
| 1428220_at   | -0.006652452 | 7.228420368 | -0.098115672 | 0.923900017 | 0.923900017 | -5.627214106 |
| 1444627_at   | -0.006538365 | 3.477812306 | -0.098003178 | 0.923986961 | 0.923986961 | -5.627224763 |
| 1458113_at   | -0.01157226  | 4.289365304 | -0.098002733 | 0.923987305 | 0.923987305 | -5.627224805 |
| 1439276_at   | 0.008172844  | 6.119097643 | 0.097988788  | 0.923998083 | 0.923998083 | -5.627226125 |
| 1439672_at   | 0.006446299  | 6.4207074   | 0.097975717  | 0.924008185 | 0.924008185 | -5.627227363 |
| 1430833_at   | 0.006694273  | 3.378858362 | 0.097974419  | 0.924009188 | 0.924009188 | -5.627227486 |
| 1437075_at   | -0.008248564 | 3.906619084 | -0.09795249  | 0.924026136 | 0.924026136 | -5.627229561 |
| 1417551_at   | -0.006614768 | 6.487618074 | -0.097896415 | 0.924069476 | 0.924069476 | -5.627234866 |
| 1452250_a_at | -0.008078715 | 11.91135936 | -0.097895311 | 0.924070329 | 0.924070329 | -5.62723497  |
| 1429535_at   | 0.007396511  | 7.782907457 | 0.097869651  | 0.924090161 | 0.924090161 | -5.627237397 |
| 1452086_at   | 0.007925064  | 7.177177809 | 0.097864645  | 0.924094031 | 0.924094031 | -5.62723787  |
| 1455547_at   | 0.009673457  | 9.143927904 | 0.097801934  | 0.924142499 | 0.924142499 | -5.627243798 |
| 1436249_at   | -0.008324544 | 6.967887894 | -0.09779381  | 0.924148778 | 0.924148778 | -5.627244565 |
| 1435593_x_at | 0.006973925  | 12.92268729 | 0.097790379  | 0.92415143  | 0.92415143  | -5.627244889 |
| 1452980_at   | -0.007840994 | 4.902744177 | -0.097751767 | 0.924181273 | 0.924181273 | -5.627248537 |
| 1422458_at   | -0.009150056 | 4.107814185 | -0.09766438  | 0.924248814 | 0.924248814 | -5.627256786 |
| 1435255_at   | 0.007453413  | 8.823213773 | 0.097658606  | 0.924253277 | 0.924253277 | -5.62725733  |
| 1433748_at   | -0.008076866 | 8.260474628 | -0.097656181 | 0.924255151 | 0.924255151 | -5.627257559 |
| 1446812_at   | 0.015981141  | 4.490852188 | 0.097647147  | 0.924262134 | 0.924262134 | -5.627258412 |
| 1452418_at   | -0.007565131 | 9.146745914 | -0.097641934 | 0.924266163 | 0.924266163 | -5.627258903 |
| 1447851_x_at | -0.018105056 | 6.314077245 | -0.097613598 | 0.924288064 | 0.924288064 | -5.627261576 |
| 1438535_at   | -0.010316499 | 8.627351161 | -0.097594752 | 0.92430263  | 0.92430263  | -5.627263353 |
| 1426276_at   | 0.007100735  | 5.915652687 | 0.097581551  | 0.924312833 | 0.924312833 | -5.627264598 |
| 1432929_at   | -0.006986911 | 4.015833383 | -0.097551489 | 0.924336069 | 0.924336069 | -5.627267431 |
| 1418550_x_at | -0.007411681 | 4.751687915 | -0.097547322 | 0.92433929  | 0.92433929  | -5.627267824 |
| 1443289_at   | -0.015495692 | 5.109088958 | -0.0974955   | 0.924379344 | 0.924379344 | -5.627272707 |
| 1436501_at   | -0.006897488 | 6.815214396 | -0.097493868 | 0.924380605 | 0.924380605 | -5.62727286  |
| 1435465_at   | 0.011196596  | 7.910104035 | 0.097471685  | 0.924397751 | 0.924397751 | -5.62727495  |
| 1459149_at   | 0.006706661  | 3.428111422 | 0.097373727  | 0.924473465 | 0.924473465 | -5.62728417  |
| 1436023_at   | -0.008948654 | 9.085891258 | -0.097297152 | 0.924532652 | 0.924532652 | -5.627291371 |
| 1433164_at   | 0.008721597  | 4.25368378  | 0.097274168  | 0.924550418 | 0.924550418 | -5.627293531 |
| 1420611_at   | 0.007239945  | 9.742359125 | 0.097268095  | 0.924555111 | 0.924555111 | -5.627294101 |
| 1460445_at   | 0.007131281  | 8.360701578 | 0.09726012   | 0.924561276 | 0.924561276 | -5.627294851 |
| 1423683_at   | -0.006283027 | 9.399734112 | -0.097246954 | 0.924571452 | 0.924571452 | -5.627296088 |
| 1457206_at   | 0.055982785  | 6.791843857 | 0.097223533  | 0.924589555 | 0.924589555 | -5.627298288 |
| 1443563_at   | 0.006793895  | 3.573595355 | 0.097165978  | 0.924634042 | 0.924634042 | -5.627303693 |
| 1422399_a_at | -0.008677961 | 7.19562938  | -0.097149604 | 0.924646698 | 0.924646698 | -5.62730523  |
| 1432266_at   | 0.010052957  | 4.689917309 | 0.097141631  | 0.924652861 | 0.924652861 | -5.627305978 |
| 1446380_at   | 0.014552969  | 6.254928628 | 0.097103799  | 0.924682103 | 0.924682103 | -5.627309528 |
| 1433144_at   | 0.007775525  | 3.988011502 | 0.097103522  | 0.924682317 | 0.924682317 | -5.627309554 |
| 1454316_at   | -0.006648046 | 5.172624005 | -0.097058025 | 0.924717484 | 0.924717484 | -5.627313821 |
| 1415738_at   | 0.007028616  | 9.843712301 | 0.09698719   | 0.924772237 | 0.924772237 | -5.627320461 |
| 1445020_at   | 0.009182976  | 5.906246735 | 0.096984347  | 0.924774434 | 0.924774434 | -5.627320727 |
| 1430757_at   | -0.008500945 | 5.792416857 | -0.096970256 | 0.924785326 | 0.924785326 | -5.627322048 |
| 1453316_at   | 0.007041802  | 5.412738948 | 0.09695562   | 0.924796639 | 0.924796639 | -5.627323419 |
| 1441932_at   | -0.00639319  | 3.356724578 | -0.09692611  | 0.924819449 | 0.924819449 | -5.627326182 |

|              |              |             |              |             |             |              |
|--------------|--------------|-------------|--------------|-------------|-------------|--------------|
| 1418751_at   | -0.010058445 | 4.281884448 | -0.096877736 | 0.924856841 | 0.924856841 | -5.627330711 |
| 1436914_at   | -0.00786899  | 7.382605675 | -0.096839174 | 0.924886648 | 0.924886648 | -5.62733432  |
| 1443785_x_at | -0.009320046 | 5.956731558 | -0.096831598 | 0.924892504 | 0.924892504 | -5.627335029 |
| 1424024_at   | -0.0067686   | 10.33952185 | -0.096811235 | 0.924908245 | 0.924908245 | -5.627336933 |
| 1439589_at   | 0.008701344  | 5.523678419 | 0.096809943  | 0.924909243 | 0.924909243 | -5.627337054 |
| 1415691_at   | -0.006955521 | 10.00777483 | -0.096795199 | 0.92492064  | 0.92492064  | -5.627338433 |
| 1453536_at   | 0.011386252  | 3.877826469 | 0.096788592  | 0.924925747 | 0.924925747 | -5.627339051 |
| 1442502_at   | 0.00706307   | 6.37705753  | 0.096775349  | 0.924935983 | 0.924935983 | -5.627340289 |
| 1427346_at   | -0.01547896  | 3.538398757 | -0.096740572 | 0.924962865 | 0.924962865 | -5.62734354  |
| 1458767_at   | -0.008328499 | 5.272225204 | -0.096727967 | 0.924972609 | 0.924972609 | -5.627344718 |
| 1460740_at   | 0.007972798  | 6.275737982 | 0.09670603   | 0.924989566 | 0.924989566 | -5.627346768 |
| 1449362_a_at | 0.007787829  | 7.971171668 | 0.096624504  | 0.925052584 | 0.925052584 | -5.627354382 |
| 1433908_a_at | -0.007871592 | 11.19108071 | -0.096556997 | 0.925104767 | 0.925104767 | -5.627360682 |
| 1456308_x_at | -0.006285542 | 11.85248829 | -0.096527869 | 0.925127282 | 0.925127282 | -5.627363399 |
| 1455125_at   | 0.007696765  | 4.1685529   | 0.096517781  | 0.925135081 | 0.925135081 | -5.62736434  |
| 1435964_a_at | 0.01170124   | 6.636295694 | 0.096490305  | 0.92515632  | 0.92515632  | -5.627366901 |
| 1459369_at   | -0.007195182 | 3.23085903  | -0.096477543 | 0.925166185 | 0.925166185 | -5.627368091 |
| 1427333_s_at | -0.006982768 | 8.583625223 | -0.096456646 | 0.925182339 | 0.925182339 | -5.627370039 |
| 1458546_at   | 0.009650601  | 3.998991312 | 0.096442861  | 0.925192994 | 0.925192994 | -5.627371323 |
| 1445573_at   | -0.007079048 | 4.560088826 | -0.096430733 | 0.925202369 | 0.925202369 | -5.627372453 |
| 1438138_a_at | -0.010833791 | 7.074163111 | -0.096422445 | 0.925208776 | 0.925208776 | -5.627373225 |
| 1448646_at   | -0.00648296  | 8.413765327 | -0.096420727 | 0.925210104 | 0.925210104 | -5.627373385 |
| 1447743_x_at | 0.008091076  | 5.400285278 | 0.096417116  | 0.925212895 | 0.925212895 | -5.627373722 |
| 1454000_s_at | 0.017285525  | 4.819571972 | 0.096382112  | 0.925239953 | 0.925239953 | -5.627376982 |
| 1441508_at   | 0.008806822  | 3.996073842 | 0.09637876   | 0.925242545 | 0.925242545 | -5.627377294 |
| 1457082_at   | -0.006614159 | 5.572352996 | -0.096354467 | 0.925261323 | 0.925261323 | -5.627379556 |
| 1431084_x_at | 0.0084124    | 6.580366457 | 0.096334905  | 0.925276445 | 0.925276445 | -5.627381376 |
| 1447671_x_at | 0.006408116  | 4.140134473 | 0.096325826  | 0.925283464 | 0.925283464 | -5.627382222 |
| 1424372_at   | 0.007228657  | 9.992305925 | 0.096313914  | 0.925292671 | 0.925292671 | -5.62738333  |
| 1428067_at   | -0.00799934  | 5.552666592 | -0.096243754 | 0.925346907 | 0.925346907 | -5.627389856 |
| 1425968_s_at | -0.007549128 | 7.230361688 | -0.096241943 | 0.925348307 | 0.925348307 | -5.627390025 |
| 1417011_at   | -0.009264069 | 9.799776695 | -0.096235014 | 0.925353663 | 0.925353663 | -5.627390669 |
| 1428534_at   | -0.005889653 | 7.297467307 | -0.096155989 | 0.925414751 | 0.925414751 | -5.627398013 |
| 1426607_at   | -0.029277386 | 7.346577169 | -0.096141503 | 0.92542595  | 0.92542595  | -5.627399359 |
| 1424224_at   | 0.006633344  | 8.464171084 | 0.096125347  | 0.925438439 | 0.925438439 | -5.62740086  |
| 1446125_at   | -0.006441136 | 3.095512504 | -0.096086257 | 0.925468657 | 0.925468657 | -5.627404489 |
| 1435166_at   | 0.008781778  | 4.816960173 | 0.096070803  | 0.925480603 | 0.925480603 | -5.627405924 |
| 1450773_at   | -0.008236475 | 4.325548352 | -0.096068204 | 0.925482612 | 0.925482612 | -5.627406165 |
| 1418638_at   | -0.006038593 | 4.072566733 | -0.096065992 | 0.925484322 | 0.925484322 | -5.62740637  |
| 1416130_at   | -0.007876233 | 8.480677445 | -0.096059258 | 0.925489528 | 0.925489528 | -5.627406995 |
| 1421116_a_at | 0.007106945  | 10.94257191 | 0.095994936  | 0.925539251 | 0.925539251 | -5.627412963 |
| 1453516_at   | -0.00812205  | 3.348284273 | -0.095976712 | 0.925553339 | 0.925553339 | -5.627414653 |
| 1427819_at   | -0.008858381 | 7.102964935 | -0.0959767   | 0.925553348 | 0.925553348 | -5.627414654 |
| 1445164_at   | -0.007272495 | 3.747437756 | -0.09589768  | 0.925614434 | 0.925614434 | -5.627421978 |
| 1459723_at   | -0.009479552 | 5.391310402 | -0.095896408 | 0.925615418 | 0.925615418 | -5.627422096 |
| 1431747_at   | -0.007142754 | 4.477617955 | -0.095880788 | 0.925627493 | 0.925627493 | -5.627423543 |
| 1446904_at   | 0.013017761  | 4.695382874 | 0.095867979  | 0.925637395 | 0.925637395 | -5.62742473  |
| 1440168_x_at | 0.007200853  | 8.36825289  | 0.095792763  | 0.925695541 | 0.925695541 | -5.627431694 |
| 1418527_a_at | 0.007596083  | 9.467444224 | 0.0957498    | 0.925728754 | 0.925728754 | -5.627435669 |
| 1442102_at   | -0.008711202 | 5.848932667 | -0.095698402 | 0.925768488 | 0.925768488 | -5.627440423 |
| 1423731_at   | 0.009645397  | 8.193812046 | 0.095670278  | 0.92579023  | 0.92579023  | -5.627443023 |
| 1416946_a_at | -0.007937471 | 8.196414973 | -0.09563206  | 0.925819776 | 0.925819776 | -5.627446555 |
| 1426657_s_at | -0.00890938  | 8.620721289 | -0.095623746 | 0.925826202 | 0.925826202 | -5.627447323 |



|              |              |             |              |             |             |              |
|--------------|--------------|-------------|--------------|-------------|-------------|--------------|
| 1415952_at   | -0.008432687 | 8.807631649 | -0.0955702   | 0.925867597 | 0.925867597 | -5.627452268 |
| 1425892_a_at | -0.009915546 | 4.5591359   | -0.095555546 | 0.925878926 | 0.925878926 | -5.627453621 |
| 1417167_at   | 0.00642955   | 8.034230737 | 0.095482652  | 0.92593528  | 0.92593528  | -5.627460349 |
| 1438022_at   | -0.007784701 | 7.488185368 | -0.095465976 | 0.925948172 | 0.925948172 | -5.627461887 |
| 1458974_at   | 0.008910974  | 7.69516508  | 0.095441141  | 0.925967371 | 0.925967371 | -5.627464177 |
| 1446588_at   | -0.00853269  | 3.718834814 | -0.095438459 | 0.925969444 | 0.925969444 | -5.627464424 |
| 1418924_at   | 0.008258281  | 7.297947212 | 0.095419126  | 0.92598439  | 0.92598439  | -5.627466207 |
| 1415937_s_at | -0.01223455  | 6.920516576 | -0.095395093 | 0.92600297  | 0.92600297  | -5.627468422 |
| 1446495_at   | -0.012128817 | 4.621038176 | -0.095383369 | 0.926012034 | 0.926012034 | -5.627469503 |
| 1430247_at   | 0.006358271  | 5.581024106 | 0.095373941  | 0.926019322 | 0.926019322 | -5.627470372 |
| 1429967_at   | -0.006176608 | 6.950463954 | -0.09534576  | 0.926041109 | 0.926041109 | -5.627472968 |
| 1422325_at   | 0.005640882  | 3.452467896 | 0.095339887  | 0.926045649 | 0.926045649 | -5.627473509 |
| 1450805_at   | 0.007242289  | 4.826713107 | 0.095322859  | 0.926058814 | 0.926058814 | -5.627475078 |
| 1457637_at   | 0.014206157  | 8.678471599 | 0.095268774  | 0.926100627 | 0.926100627 | -5.627480057 |
| 1452385_at   | -0.017628661 | 4.706764772 | -0.09525636  | 0.926110224 | 0.926110224 | -5.6274812   |
| 1419808_at   | -0.008416773 | 6.020011338 | -0.09524707  | 0.926117407 | 0.926117407 | -5.627482055 |
| 1418381_at   | -0.010321955 | 7.482801605 | -0.095214171 | 0.926142841 | 0.926142841 | -5.627485082 |
| 1444898_at   | -0.009704944 | 4.634846055 | -0.095095815 | 0.926234343 | 0.926234343 | -5.627495963 |
| 1418619_at   | -0.007863726 | 4.720813208 | -0.09505376  | 0.926266857 | 0.926266857 | -5.627499826 |
| 1435198_at   | 0.009088934  | 6.854442999 | 0.095052594  | 0.926267758 | 0.926267758 | -5.627499933 |
| 1428975_at   | 0.006096375  | 4.414208551 | 0.095044152  | 0.926274285 | 0.926274285 | -5.627500708 |
| 1453514_at   | -0.008053855 | 4.700364427 | -0.095042237 | 0.926275765 | 0.926275765 | -5.627500884 |
| 1435226_at   | -0.007537087 | 6.991783273 | -0.094985105 | 0.926319935 | 0.926319935 | -5.627506129 |
| 1458042_at   | -0.014909205 | 3.716055292 | -0.094979297 | 0.926324426 | 0.926324426 | -5.627506662 |
| 1448785_at   | -0.009174452 | 7.819859544 | -0.094951387 | 0.926346004 | 0.926346004 | -5.627509223 |
| 1452855_at   | -0.007377536 | 4.77174869  | -0.094923025 | 0.926367931 | 0.926367931 | -5.627511824 |
| 1434244_x_at | 0.006812606  | 7.779595265 | 0.094921701  | 0.926368955 | 0.926368955 | -5.627511946 |
| 1448735_at   | 0.007960549  | 3.429836026 | 0.094909959  | 0.926378033 | 0.926378033 | -5.627513022 |
| 1424255_at   | -0.006211279 | 10.14742547 | -0.094909433 | 0.92637844  | 0.92637844  | -5.627513071 |
| 1456195_x_at | -0.00660832  | 9.677266431 | -0.094884445 | 0.926397759 | 0.926397759 | -5.627515362 |
| 1417190_at   | -0.00776657  | 7.851630162 | -0.094835698 | 0.926435446 | 0.926435446 | -5.62751983  |
| 1440088_at   | 0.011029599  | 4.06206288  | 0.094833677  | 0.92643701  | 0.92643701  | -5.627520015 |
| 1443149_at   | 0.006726867  | 4.413784686 | 0.094822703  | 0.926445494 | 0.926445494 | -5.62752102  |
| 1458981_at   | -0.009314414 | 4.273359014 | -0.094760619 | 0.926493493 | 0.926493493 | -5.627526706 |
| 1415858_at   | 0.006945148  | 11.41387277 | 0.094758238  | 0.926495334 | 0.926495334 | -5.627526924 |
| 1440558_at   | 0.00808676   | 6.438027501 | 0.094743531  | 0.926506705 | 0.926506705 | -5.627528271 |
| 1432502_at   | 0.012910455  | 4.233675767 | 0.094719341  | 0.926525407 | 0.926525407 | -5.627530485 |
| 1429591_at   | 0.008674497  | 4.983661461 | 0.094701643  | 0.92653909  | 0.92653909  | -5.627532104 |
| 1444962_at   | 0.00825666   | 6.041899591 | 0.094693048  | 0.926545735 | 0.926545735 | -5.62753289  |
| 1443292_at   | 0.006437559  | 3.202865662 | 0.094654258  | 0.926575726 | 0.926575726 | -5.627536439 |
| 1447336_at   | -0.007259358 | 4.881631489 | -0.094647123 | 0.926581242 | 0.926581242 | -5.627537091 |
| 1459834_x_at | -0.010387857 | 4.048973245 | -0.094591426 | 0.926624305 | 0.926624305 | -5.627542183 |
| 1459375_at   | -0.00806233  | 3.000398268 | -0.094585166 | 0.926629145 | 0.926629145 | -5.627542755 |
| 1422185_a_at | 0.007284725  | 10.23418082 | 0.094570393  | 0.926640567 | 0.926640567 | -5.627544105 |
| 1433411_at   | -0.009027034 | 5.172609547 | -0.094546282 | 0.926659209 | 0.926659209 | -5.627546308 |
| 1421960_at   | -0.006895669 | 8.255839741 | -0.094504797 | 0.926691283 | 0.926691283 | -5.627550097 |
| 1429272_a_at | -0.009645042 | 5.669477352 | -0.094494746 | 0.926699054 | 0.926699054 | -5.627551014 |
| 1447686_at   | -0.008820207 | 3.408021947 | -0.094472997 | 0.926715869 | 0.926715869 | -5.627553    |
| 1416971_at   | -0.006617288 | 11.49423021 | -0.094472992 | 0.926715874 | 0.926715874 | -5.627553    |
| 1446010_at   | 0.007699231  | 3.716371019 | 0.094458021  | 0.926727448 | 0.926727448 | -5.627554367 |
| 1451966_at   | 0.00808699   | 3.486480616 | 0.094452341  | 0.92673184  | 0.92673184  | -5.627554885 |
| 1457102_at   | 0.013931146  | 6.160236081 | 0.094381896  | 0.926786306 | 0.926786306 | -5.627561311 |
| 1436273_at   | -0.007600791 | 5.874539093 | -0.094349661 | 0.926811229 | 0.926811229 | -5.62756425  |

|              |              |             |              |             |             |              |
|--------------|--------------|-------------|--------------|-------------|-------------|--------------|
| 1424280_at   | 0.007878086  | 8.624576627 | 0.094337412  | 0.9268207   | 0.9268207   | -5.627565367 |
| 1458674_at   | 0.010893045  | 4.465125534 | 0.094260515  | 0.926880156 | 0.926880156 | -5.627572373 |
| 1441337_at   | -0.005782465 | 5.048438845 | -0.094218935 | 0.926912304 | 0.926912304 | -5.627576159 |
| 1421643_at   | -0.01197454  | 4.810491257 | -0.094214057 | 0.926916076 | 0.926916076 | -5.627576603 |
| 1451770_s_at | -0.008169803 | 10.97755289 | -0.094125391 | 0.926984632 | 0.926984632 | -5.62758467  |
| 1429336_at   | 0.010917887  | 6.964134619 | 0.094110806  | 0.926995909 | 0.926995909 | -5.627585997 |
| 1440960_at   | 0.011120916  | 3.790239904 | 0.094097916  | 0.927005876 | 0.927005876 | -5.627587169 |
| 1446513_at   | 0.005870821  | 3.654118049 | 0.094087828  | 0.927013676 | 0.927013676 | -5.627588086 |
| 1443757_x_at | -0.00762671  | 4.483364357 | -0.094078827 | 0.927020635 | 0.927020635 | -5.627588904 |
| 1428009_a_at | 0.009743329  | 6.265597525 | 0.094074725  | 0.927023807 | 0.927023807 | -5.627589277 |
| 1435019_at   | 0.009063858  | 9.656854638 | 0.094040933  | 0.927049934 | 0.927049934 | -5.627592348 |
| 1422386_at   | 0.007463443  | 5.391151009 | 0.093978612  | 0.927098122 | 0.927098122 | -5.627598009 |
| 1452639_at   | -0.013556788 | 4.562332639 | -0.093967741 | 0.927106527 | 0.927106527 | -5.627598996 |
| 1422194_at   | -0.011570278 | 4.539789389 | -0.093964185 | 0.927109277 | 0.927109277 | -5.627599319 |
| 1436117_at   | 0.007349531  | 6.655237168 | 0.093963716  | 0.927109639 | 0.927109639 | -5.627599361 |
| 1440276_at   | -0.00767144  | 4.937137931 | -0.093939034 | 0.927128724 | 0.927128724 | -5.627601602 |
| 1453697_at   | 0.006541681  | 4.366136693 | 0.093907305  | 0.927153257 | 0.927153257 | -5.627604481 |
| 1457719_at   | -0.010356221 | 6.147936377 | -0.093901634 | 0.927157642 | 0.927157642 | -5.627604996 |
| 1456487_at   | 0.007836562  | 7.852671336 | 0.093885015  | 0.927170492 | 0.927170492 | -5.627606503 |
| 1419101_at   | -0.006958909 | 7.796041    | -0.093850638 | 0.927197073 | 0.927197073 | -5.627609621 |
| 1451575_a_at | 0.008741617  | 9.370836866 | 0.093839243  | 0.927205883 | 0.927205883 | -5.627610654 |
| 1458821_at   | -0.011136261 | 5.503040841 | -0.093808832 | 0.927229398 | 0.927229398 | -5.627613411 |
| 1446161_at   | -0.009388575 | 4.206540062 | -0.093786081 | 0.927246989 | 0.927246989 | -5.627615473 |
| 1419154_at   | -0.016485097 | 6.033914041 | -0.093769184 | 0.927260054 | 0.927260054 | -5.627617004 |
| 1418017_at   | 0.007440223  | 9.611359544 | 0.093765131  | 0.927263188 | 0.927263188 | -5.627617371 |
| 1416924_at   | 0.005870564  | 8.84151283  | 0.093747922  | 0.927276495 | 0.927276495 | -5.62761893  |
| 1441190_at   | -0.01014354  | 5.506981926 | -0.093675712 | 0.927332329 | 0.927332329 | -5.627625468 |
| 1430924_at   | 0.008836035  | 4.301357887 | 0.093668503  | 0.927337904 | 0.927337904 | -5.627626121 |
| 1417622_at   | -0.007546565 | 10.861581   | -0.093668502 | 0.927337904 | 0.927337904 | -5.627626121 |
| 1459514_at   | -0.010604912 | 4.915697615 | -0.09366625  | 0.927339646 | 0.927339646 | -5.627626325 |
| 1453143_at   | 0.007894082  | 3.375297529 | 0.093647604  | 0.927354064 | 0.927354064 | -5.627628012 |
| 1448870_at   | -0.007971721 | 8.95516105  | -0.093644097 | 0.927356776 | 0.927356776 | -5.627628329 |
| 1455617_at   | -0.006148829 | 6.340557135 | -0.093639811 | 0.927360089 | 0.927360089 | -5.627628717 |
| 1459713_s_at | -0.011424491 | 9.704937845 | -0.093639333 | 0.927360459 | 0.927360459 | -5.62762876  |
| 1419253_at   | -0.007030117 | 8.371676767 | -0.093633249 | 0.927365163 | 0.927365163 | -5.627629311 |
| 1424143_a_at | -0.007885356 | 10.1119915  | -0.093619592 | 0.927375723 | 0.927375723 | -5.627630546 |
| 1435569_at   | -0.006285471 | 3.255707947 | -0.093595227 | 0.927394563 | 0.927394563 | -5.62763275  |
| 1424279_at   | 0.008971327  | 3.389661737 | 0.093567829  | 0.927415748 | 0.927415748 | -5.627635227 |
| 1444843_at   | -0.006668325 | 3.239853205 | -0.093567319 | 0.927416143 | 0.927416143 | -5.627635273 |
| 1453731_a_at | 0.007008146  | 8.592401879 | 0.093523402  | 0.927450101 | 0.927450101 | -5.627639243 |
| 1437939_s_at | -0.011450231 | 4.355993427 | -0.093520998 | 0.92745196  | 0.92745196  | -5.62763946  |
| 1452381_at   | 0.009168892  | 9.86618379  | 0.093458045  | 0.927500638 | 0.927500638 | -5.627645147 |
| 1448176_a_at | -0.007697476 | 11.85189135 | -0.093443254 | 0.927512075 | 0.927512075 | -5.627646482 |
| 1437838_x_at | -0.011079853 | 10.29179259 | -0.093388732 | 0.927554234 | 0.927554234 | -5.627651403 |
| 1416206_at   | -0.011292338 | 7.450467784 | -0.093375072 | 0.927564797 | 0.927564797 | -5.627652636 |
| 1425479_at   | -0.010506013 | 6.786289124 | -0.093365651 | 0.927572082 | 0.927572082 | -5.627653486 |
| 1432267_at   | -0.007107721 | 3.930846074 | -0.093359218 | 0.927577056 | 0.927577056 | -5.627654066 |
| 1441923_s_at | -0.00594318  | 6.233386072 | -0.09335133  | 0.927583156 | 0.927583156 | -5.627654777 |
| 1416139_at   | 0.007113866  | 5.729044039 | 0.0932384    | 0.92767048  | 0.92767048  | -5.627664957 |
| 1424284_at   | -0.007798485 | 7.643655764 | -0.093180823 | 0.927715003 | 0.927715003 | -5.627670143 |
| 1450388_s_at | -0.006484767 | 10.60640511 | -0.093167189 | 0.927725546 | 0.927725546 | -5.62767137  |
| 1423079_a_at | -0.008164246 | 12.13523633 | -0.093092906 | 0.927782986 | 0.927782986 | -5.627678054 |
| 1449643_s_at | 0.006332264  | 11.56461548 | 0.093092457  | 0.927783334 | 0.927783334 | -5.627678095 |

|              |              |             |              |             |             |              |
|--------------|--------------|-------------|--------------|-------------|-------------|--------------|
| 1453179_at   | 0.005902212  | 4.054477785 | 0.093058088  | 0.92780991  | 0.92780991  | -5.627681185 |
| 1428870_at   | -0.013867226 | 7.701717303 | -0.093006417 | 0.927849867 | 0.927849867 | -5.62768583  |
| 1460296_a_at | -0.005760614 | 6.02296357  | -0.092935395 | 0.927904787 | 0.927904787 | -5.62769221  |
| 1420105_at   | 0.007262948  | 3.432488304 | 0.092916792  | 0.927919173 | 0.927919173 | -5.62769388  |
| 1457229_at   | -0.007682863 | 6.207240875 | -0.092903627 | 0.927929353 | 0.927929353 | -5.627695062 |
| 1452856_at   | 0.007863375  | 9.592995381 | 0.092857429  | 0.927965078 | 0.927965078 | -5.627699208 |
| 1430635_at   | -0.010137222 | 3.693627764 | -0.092849302 | 0.927971362 | 0.927971362 | -5.627699937 |
| 1420482_at   | 0.012796355  | 6.848785305 | 0.092797184  | 0.928011665 | 0.928011665 | -5.627704612 |
| 1424189_at   | 0.008197424  | 8.602023004 | 0.092756854  | 0.928042852 | 0.928042852 | -5.627708227 |
| 1419675_at   | -0.00685944  | 5.120580079 | -0.092707396 | 0.928081099 | 0.928081099 | -5.627712658 |
| 1447319_at   | -0.008786552 | 4.040215719 | -0.092657596 | 0.928119609 | 0.928119609 | -5.627717118 |
| 1431941_at   | -0.006114696 | 4.488438757 | -0.092586321 | 0.928174727 | 0.928174727 | -5.627723497 |
| 1451436_at   | -0.008697619 | 6.023016338 | -0.092568966 | 0.928188149 | 0.928188149 | -5.627725049 |
| 1417457_at   | 0.006339804  | 11.00122933 | 0.092552793  | 0.928200656 | 0.928200656 | -5.627726496 |
| 1435268_at   | 0.010379519  | 4.649148219 | 0.092535129  | 0.928214316 | 0.928214316 | -5.627728075 |
| 1449190_a_at | 0.007969237  | 8.808803705 | 0.092530459  | 0.928217927 | 0.928217927 | -5.627728493 |
| 1425581_s_at | -0.011813443 | 6.654511934 | -0.092454973 | 0.928276302 | 0.928276302 | -5.627735239 |
| 1442285_at   | 0.008179843  | 5.796553881 | 0.092419544  | 0.9283037   | 0.9283037   | -5.627738403 |
| 1424943_at   | -0.008234591 | 3.373134237 | -0.092417996 | 0.928304897 | 0.928304897 | -5.627738541 |
| 1420297_at   | -0.009489636 | 3.317529414 | -0.092372497 | 0.928340083 | 0.928340083 | -5.627742603 |
| 1430964_at   | 0.011437316  | 3.760742974 | 0.092346886  | 0.928359889 | 0.928359889 | -5.627744889 |
| 1437845_x_at | -0.008999627 | 11.01937617 | -0.092318687 | 0.928381696 | 0.928381696 | -5.627747405 |
| 1456291_x_at | 0.008453534  | 3.988452544 | 0.092145526  | 0.92851561  | 0.92851561  | -5.627762836 |
| 1437170_x_at | 0.009905157  | 4.632447241 | 0.092138616  | 0.928520954 | 0.928520954 | -5.627763452 |
| 1444713_at   | 0.008825079  | 6.009359455 | 0.092135972  | 0.928522999 | 0.928522999 | -5.627763687 |
| 1422090_a_at | 0.010787566  | 4.018339953 | 0.092076076  | 0.928569319 | 0.928569319 | -5.627769018 |
| 1422339_at   | -0.006522533 | 4.461311866 | -0.092029819 | 0.928605092 | 0.928605092 | -5.627773132 |
| 1447145_at   | 0.008363111  | 3.92880122  | 0.092019825  | 0.928612821 | 0.928612821 | -5.62777402  |
| 1453029_s_at | -0.005992226 | 9.698247291 | -0.092013591 | 0.928617643 | 0.928617643 | -5.627774575 |
| 1459986_a_at | -0.005465308 | 14.08483925 | -0.0919923   | 0.928634108 | 0.928634108 | -5.627776467 |
| 1423386_at   | -0.007027243 | 8.277018616 | -0.091895398 | 0.92870905  | 0.92870905  | -5.627785076 |
| 1423815_at   | -0.00552199  | 8.081556192 | -0.091893028 | 0.928710882 | 0.928710882 | -5.627785287 |
| 1456524_at   | -0.008321285 | 4.008958255 | -0.091833208 | 0.928757145 | 0.928757145 | -5.627790596 |
| 1451933_a_at | 0.00613132   | 3.263570544 | 0.091824848  | 0.92876361  | 0.92876361  | -5.627791338 |
| 1444617_at   | -0.015387246 | 5.060237965 | -0.091742184 | 0.928827541 | 0.928827541 | -5.627798669 |
| 1425045_at   | -0.011692072 | 7.246871364 | -0.091738732 | 0.928830212 | 0.928830212 | -5.627798975 |
| 1456468_x_at | 0.006888838  | 3.708307004 | 0.091662454  | 0.928889204 | 0.928889204 | -5.627805734 |
| 1424046_at   | -0.005794742 | 9.666783964 | -0.091533532 | 0.928988912 | 0.928988912 | -5.627817144 |
| 1451481_s_at | -0.007178508 | 3.790245842 | -0.091522849 | 0.928997173 | 0.928997173 | -5.627818089 |
| 1458760_at   | -0.007256455 | 5.003726176 | -0.091470499 | 0.929037661 | 0.929037661 | -5.627822717 |
| 1424744_at   | -0.008188057 | 6.213535307 | -0.091413553 | 0.929081703 | 0.929081703 | -5.627827749 |
| 1451310_a_at | -0.006550252 | 11.40462346 | -0.091345037 | 0.929134695 | 0.929134695 | -5.627833798 |
| 1427166_a_at | 0.007321067  | 7.733589962 | 0.091306031  | 0.929164863 | 0.929164863 | -5.627837241 |
| 1447194_at   | -0.005899382 | 3.645981677 | -0.091260214 | 0.929200298 | 0.929200298 | -5.627841282 |
| 1452663_at   | 0.006198608  | 4.328729066 | 0.091215377  | 0.929234977 | 0.929234977 | -5.627845235 |
| 1426429_at   | -0.008133873 | 4.929870483 | -0.09120907  | 0.929239855 | 0.929239855 | -5.62784579  |
| 1445726_at   | -0.007422    | 3.690706079 | -0.091188179 | 0.929256012 | 0.929256012 | -5.627847631 |
| 1449867_at   | -0.007412773 | 6.239752542 | -0.091169049 | 0.929270808 | 0.929270808 | -5.627849317 |
| 1417321_at   | -0.006042949 | 8.916054818 | -0.091165151 | 0.929273823 | 0.929273823 | -5.62784966  |
| 1457345_at   | -0.006005298 | 4.485402127 | -0.091116189 | 0.929311691 | 0.929311691 | -5.627853972 |
| 1416631_at   | 0.006154606  | 7.607006284 | 0.091085892  | 0.929335125 | 0.929335125 | -5.627856639 |
| 1451998_at   | 0.007321385  | 5.440677603 | 0.0910644    | 0.929351747 | 0.929351747 | -5.62785853  |
| 1439332_at   | 0.00966845   | 8.576267564 | 0.090985282  | 0.92941294  | 0.92941294  | -5.627865489 |

|              |              |             |              |             |             |              |
|--------------|--------------|-------------|--------------|-------------|-------------|--------------|
| 1416961_at   | -0.006917038 | 9.270538976 | -0.090934404 | 0.929452292 | 0.929452292 | -5.627869961 |
| 1457255_x_at | 0.007320648  | 3.005418248 | 0.09091093   | 0.929470448 | 0.929470448 | -5.627872023 |
| 1429643_a_at | 0.010254621  | 4.175917909 | 0.090899351  | 0.929479403 | 0.929479403 | -5.62787304  |
| 1427384_at   | -0.008265802 | 8.591646344 | -0.090899157 | 0.929479553 | 0.929479553 | -5.627873057 |
| 1430376_at   | -0.010563264 | 3.8094928   | -0.090845947 | 0.929520709 | 0.929520709 | -5.627877729 |
| 1430848_a_at | -0.00554899  | 5.693658091 | -0.09082834  | 0.929534327 | 0.929534327 | -5.627879275 |
| 1417359_at   | -0.009842873 | 11.86519348 | -0.090822391 | 0.929538928 | 0.929538928 | -5.627879797 |
| 1438900_at   | 0.008720153  | 7.471456462 | 0.090819954  | 0.929540813 | 0.929540813 | -5.627880011 |
| 1449927_at   | -0.009026603 | 3.835329019 | -0.090814537 | 0.929545002 | 0.929545002 | -5.627880486 |
| 1421845_at   | 0.00829215   | 8.559502947 | 0.090784172  | 0.929568489 | 0.929568489 | -5.62788315  |
| 1427524_a_at | -0.008030239 | 6.49527425  | -0.090729894 | 0.92961047  | 0.92961047  | -5.62788791  |
| 1457005_at   | -0.006084598 | 6.196850695 | -0.090725303 | 0.929614022 | 0.929614022 | -5.627888313 |
| 1432622_a_at | 0.007279325  | 3.871934002 | 0.090703894  | 0.92963058  | 0.92963058  | -5.627890189 |
| 1417648_s_at | 0.015870709  | 9.018470946 | 0.090699223  | 0.929634193 | 0.929634193 | -5.627890598 |
| 1454434_at   | 0.007781288  | 3.634524589 | 0.090697849  | 0.929635256 | 0.929635256 | -5.627890719 |
| 1421561_at   | -0.00931865  | 3.825404971 | -0.090667687 | 0.929658586 | 0.929658586 | -5.627893362 |
| 1433550_at   | 0.007425175  | 9.074148385 | 0.090623646  | 0.92969265  | 0.92969265  | -5.627897219 |
| 1430797_at   | 0.009714999  | 4.185462383 | 0.090582446  | 0.929724517 | 0.929724517 | -5.627900826 |
| 1443122_at   | -0.008082254 | 4.100335589 | -0.090577864 | 0.929728061 | 0.929728061 | -5.627901227 |
| 1423659_a_at | -0.006347124 | 8.065871654 | -0.090567139 | 0.929736356 | 0.929736356 | -5.627902166 |
| 1419370_a_at | 0.007729369  | 9.220417713 | 0.0905635    | 0.929739171 | 0.929739171 | -5.627902484 |
| 1448263_a_at | 0.008619084  | 8.664255935 | 0.09055587   | 0.929745073 | 0.929745073 | -5.627903152 |
| 1428148_s_at | -0.008201555 | 7.233608012 | -0.090553685 | 0.929746763 | 0.929746763 | -5.627903343 |
| 1449653_at   | -0.007285269 | 6.462443179 | -0.090540414 | 0.929757028 | 0.929757028 | -5.627904504 |
| 1435894_at   | -0.008702686 | 4.547321346 | -0.090527845 | 0.929766749 | 0.929766749 | -5.627905604 |
| 1454308_at   | 0.007320529  | 3.304797123 | 0.090491318  | 0.929795002 | 0.929795002 | -5.627908798 |
| 1429430_at   | -0.005867401 | 6.202768004 | -0.090471011 | 0.92981071  | 0.92981071  | -5.627910574 |
| 1424593_at   | 0.005490429  | 6.915504407 | 0.090463556  | 0.929816476 | 0.929816476 | -5.627911226 |
| 1456421_at   | -0.010051777 | 4.109315676 | -0.090451798 | 0.92982557  | 0.92982557  | -5.627912253 |
| 1426860_at   | -0.010495509 | 9.382862087 | -0.090402534 | 0.929863676 | 0.929863676 | -5.627916558 |
| 1452875_at   | 0.009238934  | 5.560388184 | 0.090398494  | 0.92986668  | 0.92986668  | -5.627916911 |
| 1446231_at   | 0.010170451  | 3.886912224 | 0.090393354  | 0.929870777 | 0.929870777 | -5.62791736  |
| 1452911_at   | -0.010443498 | 6.557573454 | -0.090286434 | 0.929953478 | 0.929953478 | -5.627926693 |
| 1420435_at   | 0.007324888  | 6.324180904 | 0.090255387  | 0.929977493 | 0.929977493 | -5.627929401 |
| 1441351_at   | -0.009482968 | 6.07020676  | -0.090201857 | 0.930018898 | 0.930018898 | -5.627934068 |
| 1450502_at   | -0.011136136 | 5.235850606 | -0.090193801 | 0.930025129 | 0.930025129 | -5.62793477  |
| 1453164_a_at | -0.009424238 | 7.458665372 | -0.090193077 | 0.93002569  | 0.93002569  | -5.627934833 |
| 1443168_at   | 0.009343183  | 3.477682493 | 0.090183046  | 0.930033449 | 0.930033449 | -5.627935708 |
| 1427228_at   | -0.01113599  | 10.72109412 | -0.090175863 | 0.930039005 | 0.930039005 | -5.627936334 |
| 1460693_a_at | -0.025675043 | 6.452863208 | -0.090169152 | 0.930044196 | 0.930044196 | -5.627936918 |
| 1447429_at   | -0.007324476 | 4.400957096 | -0.090113131 | 0.930087528 | 0.930087528 | -5.627941798 |
| 1456215_at   | 0.006151874  | 5.685462635 | 0.090098399  | 0.930098924 | 0.930098924 | -5.62794308  |
| 1453680_at   | 0.006905275  | 3.391290959 | 0.090097603  | 0.93009954  | 0.93009954  | -5.62794315  |
| 1431817_at   | -0.007527635 | 3.414366888 | -0.090095261 | 0.930101351 | 0.930101351 | -5.627943354 |
| 1427412_s_at | -0.007776228 | 7.174403686 | -0.090082166 | 0.93011148  | 0.93011148  | -5.627944494 |
| 1422664_at   | -0.008600787 | 9.521342026 | -0.090069064 | 0.930121615 | 0.930121615 | -5.627945634 |
| 1420925_at   | -0.007011295 | 6.642313871 | -0.089971758 | 0.930196883 | 0.930196883 | -5.627954098 |
| 1435209_at   | 0.006657801  | 7.726999874 | 0.089867603  | 0.93027745  | 0.93027745  | -5.627963148 |
| 1417949_at   | -0.005795926 | 8.644245236 | -0.089846861 | 0.930293494 | 0.930293494 | -5.627964949 |
| 1425458_a_at | 0.005900161  | 12.75147618 | 0.089819252  | 0.93031485  | 0.93031485  | -5.627967345 |
| 1419089_at   | 0.007152356  | 9.420738509 | 0.08981684   | 0.930316716 | 0.930316716 | -5.627967555 |
| 1416968_a_at | 0.008202361  | 7.763187169 | 0.089801383  | 0.930328673 | 0.930328673 | -5.627968896 |
| 1426749_at   | 0.00694931   | 9.024269124 | 0.089674886  | 0.930426523 | 0.930426523 | -5.627979865 |

|              |              |             |              |             |             |              |
|--------------|--------------|-------------|--------------|-------------|-------------|--------------|
| 1439460_a_at | 0.00834427   | 9.76437281  | 0.089635647  | 0.930456876 | 0.930456876 | -5.627983265 |
| 1433864_at   | -0.007391092 | 8.110929927 | -0.0896114   | 0.930475633 | 0.930475633 | -5.627985364 |
| 1425809_at   | 0.008684547  | 3.785855544 | 0.08959884   | 0.930485348 | 0.930485348 | -5.627986452 |
| 1450987_a_at | 0.00660729   | 8.090234385 | 0.089548057  | 0.930524632 | 0.930524632 | -5.627990847 |
| 1451270_at   | 0.011922972  | 7.075304757 | 0.089525819  | 0.930541834 | 0.930541834 | -5.627992771 |
| 1453755_at   | -0.016597218 | 6.519272308 | -0.08952447  | 0.930542877 | 0.930542877 | -5.627992888 |
| 1429095_at   | 0.011687634  | 7.695679319 | 0.08951257   | 0.930552083 | 0.930552083 | -5.627993917 |
| 1442498_at   | -0.009247135 | 4.201696266 | -0.089422531 | 0.930621733 | 0.930621733 | -5.628001701 |
| 1420510_at   | 0.006061527  | 6.804637782 | 0.089406273  | 0.93063431  | 0.93063431  | -5.628003106 |
| 1457356_at   | -0.014578243 | 8.430087689 | -0.089363884 | 0.930667101 | 0.930667101 | -5.628006767 |
| 1458975_at   | 0.007819213  | 6.022822508 | 0.089363825  | 0.930667146 | 0.930667146 | -5.628006772 |
| 1448074_at   | 0.007048465  | 3.453350347 | 0.089310548  | 0.93070836  | 0.93070836  | -5.628011372 |
| 1417141_at   | 0.007374734  | 7.436683135 | 0.089275538  | 0.930735443 | 0.930735443 | -5.628014392 |
| 1427322_at   | -0.005552772 | 8.667229608 | -0.089258826 | 0.930748371 | 0.930748371 | -5.628015834 |
| 1443804_at   | -0.00638967  | 3.381033063 | -0.089247649 | 0.930757017 | 0.930757017 | -5.628016798 |
| 1438286_at   | 0.008019166  | 3.876696013 | 0.089182951  | 0.930807066 | 0.930807066 | -5.628022375 |
| 1451224_at   | 0.006310794  | 7.190489748 | 0.089173533  | 0.930814351 | 0.930814351 | -5.628023187 |
| 1458325_x_at | -0.009234277 | 5.331805019 | -0.089115196 | 0.93085948  | 0.93085948  | -5.628028212 |
| 1427540_at   | -0.005869894 | 7.058744858 | -0.089073386 | 0.930891824 | 0.930891824 | -5.628031812 |
| 1417870_x_at | 0.006700615  | 9.562093689 | 0.089065766  | 0.930897719 | 0.930897719 | -5.628032468 |
| 1418124_at   | -0.006639085 | 9.706672264 | -0.089043312 | 0.930915089 | 0.930915089 | -5.6280344   |
| 1441286_at   | -0.008374974 | 3.554662212 | -0.088968148 | 0.930973235 | 0.930973235 | -5.628040864 |
| 1458593_at   | 0.013328962  | 4.316473707 | 0.08895014   | 0.930987166 | 0.930987166 | -5.628042412 |
| 1431636_at   | -0.006484502 | 5.12614941  | -0.088947789 | 0.930988985 | 0.930988985 | -5.628042614 |
| 1429959_at   | 0.007607285  | 4.74433035  | 0.088912993  | 0.931015904 | 0.931015904 | -5.628045605 |
| 1438764_at   | -0.008407424 | 7.861483664 | -0.088827445 | 0.931082084 | 0.931082084 | -5.628052951 |
| 1427345_a_at | 0.007533107  | 5.668522549 | 0.08882081   | 0.931087217 | 0.931087217 | -5.628053521 |
| 1456210_at   | 0.008752196  | 6.190901919 | 0.088820441  | 0.931087502 | 0.931087502 | -5.628053552 |
| 1437502_x_at | 0.021051551  | 9.698309408 | 0.0887804    | 0.931118478 | 0.931118478 | -5.628056988 |
| 1416714_at   | -0.01899829  | 6.017210067 | -0.088715092 | 0.931169001 | 0.931169001 | -5.628062589 |
| 1433480_at   | -0.008218135 | 11.41376711 | -0.088683157 | 0.931193707 | 0.931193707 | -5.628065326 |
| 1429768_at   | 0.006114915  | 4.47767092  | 0.08855999   | 0.931288992 | 0.931288992 | -5.628075873 |
| 1445572_at   | -0.007667221 | 5.603913824 | -0.088529767 | 0.931312374 | 0.931312374 | -5.628078459 |
| 1451193_x_at | -0.006180904 | 8.96796669  | -0.088493236 | 0.931340636 | 0.931340636 | -5.628081584 |
| 1431961_at   | 0.005929859  | 5.10626574  | 0.088459876  | 0.931366444 | 0.931366444 | -5.628084436 |
| 1446683_at   | -0.007945556 | 6.455568014 | -0.088443617 | 0.931379022 | 0.931379022 | -5.628085826 |
| 1441547_at   | 0.010112445  | 8.32671255  | 0.088440881  | 0.931381139 | 0.931381139 | -5.62808606  |
| 1442722_at   | 0.007107278  | 3.971745157 | 0.088389728  | 0.931420713 | 0.931420713 | -5.62809043  |
| 1446738_at   | -0.008084435 | 4.560392552 | -0.088375668 | 0.93143159  | 0.93143159  | -5.628091631 |
| 1444761_at   | -0.00804933  | 9.320459249 | -0.088361325 | 0.931442686 | 0.931442686 | -5.628092855 |
| 1441016_at   | 0.006244702  | 4.039340948 | 0.08835765   | 0.93144553  | 0.93144553  | -5.628093169 |
| 1433383_at   | 0.010328712  | 3.708438089 | 0.088314829  | 0.931478658 | 0.931478658 | -5.628096825 |
| 1444583_at   | 0.007863882  | 6.854195696 | 0.088266326  | 0.931516182 | 0.931516182 | -5.628100963 |
| 1436008_at   | -0.006658382 | 4.686267364 | -0.088259679 | 0.931521325 | 0.931521325 | -5.62810153  |
| 1460047_at   | -0.011938156 | 4.775981569 | -0.088246181 | 0.931531768 | 0.931531768 | -5.628102681 |
| 1436579_s_at | -0.008907481 | 3.643221005 | -0.088223294 | 0.931549475 | 0.931549475 | -5.628104632 |
| 1421154_at   | 0.006598704  | 3.833426168 | 0.088178446  | 0.931584171 | 0.931584171 | -5.628108455 |
| 1442458_at   | -0.009146451 | 3.941537293 | -0.088172973 | 0.931588406 | 0.931588406 | -5.628108921 |
| 1426164_a_at | -0.005513225 | 7.354530672 | -0.088154791 | 0.931602472 | 0.931602472 | -5.62811047  |
| 1417380_at   | 0.008054778  | 10.80214923 | 0.088117336  | 0.93163145  | 0.93163145  | -5.62811366  |
| 1447934_at   | -0.00644494  | 4.30952301  | -0.088087355 | 0.931654645 | 0.931654645 | -5.628116212 |
| 1416127_a_at | 0.00605121   | 9.953764204 | 0.08806842   | 0.931669294 | 0.931669294 | -5.628117824 |
| 1433214_x_at | -0.006344269 | 3.847556825 | -0.087966199 | 0.93174838  | 0.93174838  | -5.628126518 |

|              |              |             |              |             |             |              |
|--------------|--------------|-------------|--------------|-------------|-------------|--------------|
| 1421081_a_at | -0.006807152 | 10.56117141 | -0.087949883 | 0.931761003 | 0.931761003 | -5.628127905 |
| 1453046_at   | -0.00675699  | 3.369701916 | -0.087946736 | 0.931763438 | 0.931763438 | -5.628128172 |
| 1430168_at   | 0.008564928  | 5.833247028 | 0.087899134  | 0.931800266 | 0.931800266 | -5.628132217 |
| 1445722_at   | 0.006168817  | 5.760202693 | 0.087852877  | 0.931836055 | 0.931836055 | -5.628136145 |
| 1437610_x_at | 0.005325643  | 13.46839246 | 0.087849241  | 0.931838868 | 0.931838868 | -5.628136453 |
| 1436287_at   | -0.011197477 | 4.391212474 | -0.08784756  | 0.931840168 | 0.931840168 | -5.628136596 |
| 1423273_at   | -0.009907755 | 6.178519014 | -0.087818851 | 0.93186238  | 0.93186238  | -5.628139033 |
| 1446121_at   | 0.007887831  | 4.202110519 | 0.087684389  | 0.931966412 | 0.931966412 | -5.628150435 |
| 1420839_at   | 0.006168263  | 7.165265458 | 0.087683267  | 0.93196728  | 0.93196728  | -5.62815053  |
| 1439662_at   | 0.006591949  | 7.180121366 | 0.087633058  | 0.932006126 | 0.932006126 | -5.628154783 |
| 1429839_a_at | -0.008488248 | 8.771597906 | -0.087559594 | 0.932062966 | 0.932062966 | -5.628161001 |
| 1456767_at   | 0.009956926  | 6.513105827 | 0.087558733  | 0.932063632 | 0.932063632 | -5.628161074 |
| 1416671_a_at | -0.008529855 | 6.910811585 | -0.087496786 | 0.932111561 | 0.932111561 | -5.628166314 |
| 1442477_at   | 0.009570388  | 6.308528742 | 0.087477125  | 0.932126772 | 0.932126772 | -5.628167976 |
| 1422507_at   | 0.006415555  | 10.05168511 | 0.087451106  | 0.932146903 | 0.932146903 | -5.628170175 |
| 1418233_a_at | 0.005859921  | 8.402083668 | 0.087372677  | 0.932207585 | 0.932207585 | -5.6281768   |
| 1428815_at   | 0.008557612  | 4.044673472 | 0.087367724  | 0.932211418 | 0.932211418 | -5.628177218 |
| 1419307_at   | 0.007902654  | 4.475671732 | 0.087288556  | 0.932272672 | 0.932272672 | -5.628183899 |
| 1439570_at   | -0.007997588 | 4.668972799 | -0.087281244 | 0.932278329 | 0.932278329 | -5.628184516 |
| 1422775_at   | 0.008038762  | 4.785646086 | 0.087261702  | 0.93229345  | 0.93229345  | -5.628186164 |
| 1423917_a_at | 0.006622588  | 10.75789149 | 0.087226691  | 0.932320539 | 0.932320539 | -5.628189115 |
| 1430633_s_at | -0.006634272 | 6.907825877 | -0.087190774 | 0.932348329 | 0.932348329 | -5.628192142 |
| 1451493_at   | 0.007820434  | 9.999099375 | 0.087190304  | 0.932348692 | 0.932348692 | -5.628192182 |
| 1452276_at   | 0.006611389  | 9.679683229 | 0.087130139  | 0.932395244 | 0.932395244 | -5.628197249 |
| 1436704_x_at | 0.012351569  | 5.859592774 | 0.087109259  | 0.9324114   | 0.9324114   | -5.628199007 |
| 1420421_s_at | -0.006826933 | 3.461373032 | -0.08709101  | 0.93242552  | 0.93242552  | -5.628200543 |
| 1432377_x_at | 0.008057403  | 4.836741177 | 0.087085331  | 0.932429913 | 0.932429913 | -5.628201021 |
| 1431652_at   | -0.006761847 | 3.451048189 | -0.087043276 | 0.932462453 | 0.932462453 | -5.628204559 |
| 1449447_at   | 0.008185827  | 3.634640464 | 0.087031749  | 0.932471372 | 0.932471372 | -5.628205529 |
| 1429641_x_at | -0.006625528 | 6.72617049  | -0.087014539 | 0.932484688 | 0.932484688 | -5.628206976 |
| 1435990_at   | -0.006004993 | 8.595128891 | -0.087000705 | 0.932495392 | 0.932495392 | -5.628208139 |
| 1459898_at   | 0.007176035  | 4.197905456 | 0.086991134  | 0.932502798 | 0.932502798 | -5.628208944 |
| 1421187_at   | 0.010090137  | 4.622835414 | 0.086943734  | 0.932539474 | 0.932539474 | -5.628212927 |
| 1430472_at   | 0.006565629  | 3.700024776 | 0.086936604  | 0.93254499  | 0.93254499  | -5.628213526 |
| 1426544_a_at | 0.006433521  | 8.85706669  | 0.086920449  | 0.93255749  | 0.93255749  | -5.628214883 |
| 1428648_at   | -0.006154352 | 9.88079184  | -0.086847948 | 0.932613588 | 0.932613588 | -5.628220971 |
| 1449319_at   | 0.012075994  | 9.043511021 | 0.086827647  | 0.932629296 | 0.932629296 | -5.628222674 |
| 1460602_at   | -0.00630324  | 8.119278974 | -0.086772405 | 0.932672041 | 0.932672041 | -5.628227308 |
| 1451741_a_at | -0.006777084 | 9.182347751 | -0.086759056 | 0.932682369 | 0.932682369 | -5.628228427 |
| 1441702_at   | 0.008866199  | 3.873032714 | 0.08672546   | 0.932708365 | 0.932708365 | -5.628231243 |
| 1434744_at   | -0.007367976 | 7.732724414 | -0.086671195 | 0.932750354 | 0.932750354 | -5.62823579  |
| 1457994_at   | 0.006106792  | 3.613291116 | 0.086647636  | 0.932768583 | 0.932768583 | -5.628237762 |
| 1453065_at   | -0.006850995 | 7.989813614 | -0.08662389  | 0.932786957 | 0.932786957 | -5.62823975  |
| 1427570_at   | 0.009873768  | 4.549897827 | 0.086616257  | 0.932792863 | 0.932792863 | -5.628240389 |
| 1445606_a_at | 0.009322106  | 5.786044421 | 0.086589638  | 0.93281346  | 0.93281346  | -5.628242617 |
| 1448333_at   | -0.006567646 | 10.19861238 | -0.08657369  | 0.932825801 | 0.932825801 | -5.628243951 |
| 1436225_at   | -0.005374427 | 6.331077079 | -0.086556951 | 0.932838753 | 0.932838753 | -5.628245352 |
| 1459165_at   | 0.009404026  | 3.360426104 | 0.086498917  | 0.932883658 | 0.932883658 | -5.628250204 |
| 1450240_a_at | 0.007937134  | 6.073346062 | 0.086472609  | 0.932904015 | 0.932904015 | -5.628252403 |
| 1421327_at   | 0.008182719  | 4.984828566 | 0.086459743  | 0.932913971 | 0.932913971 | -5.628253478 |
| 1451547_at   | 0.009434038  | 4.420529347 | 0.086448959  | 0.932922315 | 0.932922315 | -5.628254379 |
| 1437425_at   | 0.005432024  | 4.773408157 | 0.086448541  | 0.932922639 | 0.932922639 | -5.628254414 |
| 1450490_at   | -0.006275723 | 6.035279049 | -0.086415413 | 0.932948273 | 0.932948273 | -5.628257181 |

|              |              |             |              |             |             |              |
|--------------|--------------|-------------|--------------|-------------|-------------|--------------|
| 1451518_at   | -0.011464085 | 5.595275241 | -0.086374074 | 0.93298026  | 0.93298026  | -5.628260632 |
| 1454005_at   | 0.006402958  | 3.42833042  | 0.08631111   | 0.933028982 | 0.933028982 | -5.628265886 |
| 1431109_at   | 0.009079385  | 7.508475261 | 0.086235635  | 0.933087384 | 0.933087384 | -5.628272178 |
| 1459116_at   | -0.006988477 | 3.723622271 | -0.08622146  | 0.933098353 | 0.933098353 | -5.628273359 |
| 1431081_a_at | -0.007712873 | 8.793463025 | -0.086193461 | 0.933120019 | 0.933120019 | -5.628275692 |
| 1421690_s_at | 0.008203934  | 4.072839759 | 0.086187021  | 0.933125002 | 0.933125002 | -5.628276228 |
| 1454066_at   | -0.007052159 | 6.273094785 | -0.086173238 | 0.933135668 | 0.933135668 | -5.628277376 |
| 1425463_at   | 0.006996564  | 4.713045312 | 0.086155331  | 0.933149524 | 0.933149524 | -5.628278867 |
| 1460281_at   | -0.005386152 | 3.613645018 | -0.086125533 | 0.933172582 | 0.933172582 | -5.628281348 |
| 1440132_s_at | 0.008016065  | 8.120886706 | 0.08609957   | 0.933192672 | 0.933192672 | -5.628283508 |
| 1441139_at   | 0.00941293   | 6.433832797 | 0.08603625   | 0.933241671 | 0.933241671 | -5.628288775 |
| 1428963_at   | -0.008467972 | 5.620049672 | -0.086034534 | 0.933242998 | 0.933242998 | -5.628288917 |
| 1428423_at   | 0.005346433  | 9.654351948 | 0.086005527  | 0.933265444 | 0.933265444 | -5.628291329 |
| 1431948_a_at | 0.006126896  | 8.937347566 | 0.085999068  | 0.933270443 | 0.933270443 | -5.628291865 |
| 1434375_at   | 0.009228138  | 9.997135712 | 0.085950638  | 0.933307919 | 0.933307919 | -5.628295889 |
| 1428217_at   | 0.007296207  | 7.785578512 | 0.085945133  | 0.933312179 | 0.933312179 | -5.628296346 |
| 1440292_at   | -0.010477021 | 6.208319635 | -0.085942652 | 0.933314099 | 0.933314099 | -5.628296552 |
| 1432117_at   | 0.009358539  | 3.797600645 | 0.085938577  | 0.933317252 | 0.933317252 | -5.628296891 |
| 1421373_at   | -0.005721933 | 5.160029888 | -0.085904001 | 0.933344008 | 0.933344008 | -5.628299762 |
| 1452597_at   | -0.007098912 | 8.67613651  | -0.085879671 | 0.933362835 | 0.933362835 | -5.628301781 |
| 1445944_at   | -0.009255563 | 5.170232047 | -0.08586975  | 0.933370512 | 0.933370512 | -5.628302604 |
| 1431576_at   | -0.006290922 | 4.084968457 | -0.085868926 | 0.933371149 | 0.933371149 | -5.628302673 |
| 1445376_at   | 0.007217012  | 4.765142451 | 0.085828894  | 0.933402128 | 0.933402128 | -5.628305994 |
| 1422205_at   | 0.0063669    | 4.015644081 | 0.085821108  | 0.933408152 | 0.933408152 | -5.62830664  |
| 1448322_a_at | 0.006006397  | 12.46650555 | 0.085808494  | 0.933417914 | 0.933417914 | -5.628307686 |
| 1453582_at   | 0.010450023  | 8.023643085 | 0.085787483  | 0.933434173 | 0.933434173 | -5.628309428 |
| 1417562_at   | 0.007541561  | 8.994262355 | 0.085780507  | 0.933439571 | 0.933439571 | -5.628310006 |
| 1454353_at   | -0.008284076 | 5.879885896 | -0.085777933 | 0.933441563 | 0.933441563 | -5.62831022  |
| 1444092_at   | -0.007333884 | 6.702253314 | -0.085758291 | 0.933456763 | 0.933456763 | -5.628311848 |
| 1451587_a_at | -0.005469158 | 9.291850302 | -0.085708399 | 0.933495371 | 0.933495371 | -5.628315981 |
| 1433205_at   | 0.009252285  | 7.084446853 | 0.085661047  | 0.933532014 | 0.933532014 | -5.628319902 |
| 1423792_a_at | 0.014555058  | 7.563387138 | 0.085647183  | 0.933542743 | 0.933542743 | -5.62832105  |
| 1417994_a_at | -0.006922774 | 4.534879767 | -0.085645195 | 0.933544281 | 0.933544281 | -5.628321214 |
| 1446687_at   | 0.007609258  | 6.30105572  | 0.085640727  | 0.933547739 | 0.933547739 | -5.628321584 |
| 1438656_x_at | -0.00806037  | 9.506709951 | -0.085633634 | 0.933553228 | 0.933553228 | -5.628322171 |
| 1436149_at   | 0.007458672  | 6.46784055  | 0.085621124  | 0.933562909 | 0.933562909 | -5.628323206 |
| 1428319_at   | -0.011934741 | 8.983736088 | -0.085587348 | 0.933589046 | 0.933589046 | -5.628326    |
| 1433950_at   | 0.00718293   | 4.762583551 | 0.085583974  | 0.933591657 | 0.933591657 | -5.628326279 |
| 1450198_at   | 0.007702744  | 4.408120114 | 0.085550305  | 0.933617712 | 0.933617712 | -5.628329063 |
| 1455875_x_at | -0.007942275 | 11.59935257 | -0.085539695 | 0.933625922 | 0.933625922 | -5.62832994  |
| 1428767_at   | -0.006956946 | 6.902072138 | -0.085535191 | 0.933629408 | 0.933629408 | -5.628330313 |
| 1457611_x_at | -0.008097997 | 4.698871366 | -0.085495729 | 0.933659945 | 0.933659945 | -5.628333574 |
| 1444920_at   | 0.011555321  | 4.05307112  | 0.085490345  | 0.933664112 | 0.933664112 | -5.628334019 |
| 1422875_at   | 0.009963793  | 4.113812783 | 0.085482267  | 0.933670364 | 0.933670364 | -5.628334686 |
| 1425116_a_at | -0.006984288 | 5.536769107 | -0.085471071 | 0.933679028 | 0.933679028 | -5.628335611 |
| 1434399_at   | -0.006072086 | 5.6144006   | -0.085459649 | 0.933687867 | 0.933687867 | -5.628336554 |
| 1422122_at   | -0.007781406 | 3.544196525 | -0.085455248 | 0.933691273 | 0.933691273 | -5.628336918 |
| 1454516_at   | 0.007822989  | 3.904492711 | 0.085451613  | 0.933694085 | 0.933694085 | -5.628337218 |
| 1453671_at   | -0.007709252 | 3.772264472 | -0.085432547 | 0.93370884  | 0.93370884  | -5.628338792 |
| 1420567_at   | 0.00750991   | 7.703018272 | 0.085416763  | 0.933721055 | 0.933721055 | -5.628340095 |
| 1434548_at   | -0.012844596 | 7.390284931 | -0.085386072 | 0.933744805 | 0.933744805 | -5.628342628 |
| 1434640_at   | 0.005237908  | 4.813070073 | 0.085356183  | 0.933767935 | 0.933767935 | -5.628345094 |
| 1448984_at   | -0.00659837  | 6.841894063 | -0.085345245 | 0.9337764   | 0.9337764   | -5.628345996 |

|              |              |             |              |             |             |              |
|--------------|--------------|-------------|--------------|-------------|-------------|--------------|
| 1427001_s_at | -0.006028529 | 6.292236562 | -0.085303207 | 0.933808932 | 0.933808932 | -5.628349462 |
| 1429208_at   | 0.01263751   | 5.138403885 | 0.085267289  | 0.933836728 | 0.933836728 | -5.628352423 |
| 1435242_at   | 0.005887515  | 9.340865965 | 0.085246069  | 0.933853149 | 0.933853149 | -5.628354171 |
| 1443699_at   | -0.009596606 | 5.051455735 | -0.085226372 | 0.933868392 | 0.933868392 | -5.628355793 |
| 1426040_a_at | -0.009375972 | 6.153397928 | -0.085201885 | 0.933887342 | 0.933887342 | -5.62835781  |
| 1438134_at   | -0.01425803  | 6.04116279  | -0.085188914 | 0.93389738  | 0.93389738  | -5.628358878 |
| 1457264_at   | 0.011733105  | 7.833490673 | 0.08512918   | 0.933943608 | 0.933943608 | -5.628363794 |
| 1415709_s_at | 0.01066448   | 8.927960887 | 0.085072633  | 0.933987368 | 0.933987368 | -5.628368444 |
| 1444580_at   | 0.006617149  | 3.800929747 | 0.085060243  | 0.933996957 | 0.933996957 | -5.628369463 |
| 1418889_a_at | -0.008913723 | 9.067362073 | -0.085017654 | 0.934029916 | 0.934029916 | -5.628372963 |
| 1428626_at   | 0.008108997  | 8.361730806 | 0.084984689  | 0.934055428 | 0.934055428 | -5.62837567  |
| 1432425_at   | 0.007422189  | 3.30379803  | 0.084938999  | 0.934090787 | 0.934090787 | -5.628379422 |
| 1433293_at   | 0.018953666  | 6.204546649 | 0.084916637  | 0.934108092 | 0.934108092 | -5.628381257 |
| 1446746_at   | -0.007342888 | 3.285882108 | -0.084903629 | 0.93411816  | 0.93411816  | -5.628382325 |
| 1431140_at   | 0.005474543  | 5.344817701 | 0.084886649  | 0.934131301 | 0.934131301 | -5.628383718 |
| 1459596_at   | -0.006671924 | 4.666140478 | -0.084866703 | 0.934146736 | 0.934146736 | -5.628385354 |
| 1444863_at   | 0.008155673  | 5.309085924 | 0.084865405  | 0.934147741 | 0.934147741 | -5.62838546  |
| 1420546_at   | 0.00797836   | 4.758737217 | 0.084859073  | 0.934152642 | 0.934152642 | -5.628385979 |
| 1416581_at   | -0.006732928 | 9.304163443 | -0.08483618  | 0.934170359 | 0.934170359 | -5.628387856 |
| 1451071_a_at | -0.00585451  | 10.05997691 | -0.084758713 | 0.934230311 | 0.934230311 | -5.628394205 |
| 1447864_s_at | -0.008189254 | 8.759725258 | -0.084747497 | 0.934238991 | 0.934238991 | -5.628395123 |
| 1452028_a_at | 0.006564518  | 3.975858297 | 0.08470834   | 0.934269295 | 0.934269295 | -5.628398329 |
| 1427460_at   | -0.007602432 | 7.545267802 | -0.084681495 | 0.934290071 | 0.934290071 | -5.628400527 |
| 1420840_at   | 0.007480465  | 7.690667215 | 0.084632208  | 0.934328215 | 0.934328215 | -5.628404559 |
| 1440616_at   | -0.008174172 | 3.552889858 | -0.084602264 | 0.934351389 | 0.934351389 | -5.628407008 |
| 1417240_at   | 0.0125233    | 8.653467387 | 0.08454396   | 0.934396512 | 0.934396512 | -5.628411773 |
| 1454189_at   | 0.006439589  | 4.001557461 | 0.084533336  | 0.934404734 | 0.934404734 | -5.628412641 |
| 1431863_at   | -0.007692945 | 3.153889756 | -0.084522369 | 0.934413222 | 0.934413222 | -5.628413537 |
| 1425702_a_at | 0.005590237  | 7.538803753 | 0.084518573  | 0.93441616  | 0.93441616  | -5.628413847 |
| 1418335_a_at | -0.005657477 | 7.545922939 | -0.084511495 | 0.934421638 | 0.934421638 | -5.628414425 |
| 1460706_s_at | 0.005608683  | 8.032476155 | 0.084497559  | 0.934432424 | 0.934432424 | -5.628415563 |
| 1421217_a_at | -0.008595922 | 7.973326393 | -0.084496229 | 0.934433452 | 0.934433452 | -5.628415671 |
| 1447146_s_at | 0.00621824   | 8.903372402 | 0.084470527  | 0.934453344 | 0.934453344 | -5.62841777  |
| 1456462_x_at | 0.008719867  | 6.423781333 | 0.084455793  | 0.934464748 | 0.934464748 | -5.628418973 |
| 1440081_at   | -0.012720319 | 6.279374554 | -0.084344893 | 0.934550577 | 0.934550577 | -5.628428018 |
| 1418443_at   | -0.005360345 | 11.0415885  | -0.084282565 | 0.934598816 | 0.934598816 | -5.628433097 |
| 1426684_at   | 0.005312518  | 9.387676946 | 0.084242554  | 0.934629782 | 0.934629782 | -5.628436355 |
| 1443093_at   | 0.007051564  | 4.096613425 | 0.08419704   | 0.934665008 | 0.934665008 | -5.628440059 |
| 1439766_x_at | -0.009138599 | 7.325578752 | -0.084178391 | 0.93467944  | 0.93467944  | -5.628441576 |
| 1448178_a_at | -0.006341614 | 11.74387393 | -0.084149738 | 0.934701617 | 0.934701617 | -5.628443907 |
| 1422364_at   | 0.009463406  | 3.97270654  | 0.0840861    | 0.93475087  | 0.93475087  | -5.62844908  |
| 1444078_at   | -0.008773672 | 3.780261897 | -0.084064996 | 0.934767204 | 0.934767204 | -5.628450795 |
| 1431101_a_at | -0.009845695 | 6.647619183 | -0.084059529 | 0.934771435 | 0.934771435 | -5.628451239 |
| 1424206_at   | -0.005500317 | 10.57427551 | -0.083998597 | 0.934818594 | 0.934818594 | -5.628456187 |
| 1438907_at   | 0.006665744  | 7.500686109 | 0.083746891  | 0.935013408 | 0.935013408 | -5.628476589 |
| 1457475_at   | -0.008282698 | 3.641026239 | -0.083736324 | 0.935021587 | 0.935021587 | -5.628477444 |
| 1444623_at   | 0.008474564  | 6.235149525 | 0.083698851  | 0.93505059  | 0.93505059  | -5.628480476 |
| 1439253_x_at | -0.006743553 | 11.31547261 | -0.08368981  | 0.935057588 | 0.935057588 | -5.628481207 |
| 1446827_at   | -0.006404922 | 7.155721261 | -0.083687255 | 0.935059566 | 0.935059566 | -5.628481414 |
| 1456734_at   | -0.009974101 | 6.924321699 | -0.083675555 | 0.935068621 | 0.935068621 | -5.62848236  |
| 1457683_at   | -0.007745968 | 3.877007363 | -0.083673662 | 0.935070086 | 0.935070086 | -5.628482513 |
| 1440215_at   | -0.006905183 | 7.382314524 | -0.083643892 | 0.935093128 | 0.935093128 | -5.62848492  |
| 1459985_at   | -0.006013877 | 9.973244173 | -0.083583708 | 0.93513971  | 0.93513971  | -5.628489783 |



|              |              |             |              |             |             |              |
|--------------|--------------|-------------|--------------|-------------|-------------|--------------|
| 1434391_at   | -0.005388718 | 9.201163173 | -0.083577907 | 0.9351442   | 0.9351442   | -5.628490252 |
| 1441204_at   | -0.006651327 | 5.099745515 | -0.083565715 | 0.935153637 | 0.935153637 | -5.628491236 |
| 1418292_at   | 0.005551633  | 9.817681166 | 0.083506941  | 0.935199128 | 0.935199128 | -5.628495981 |
| 1416840_at   | -0.005775885 | 8.419052245 | -0.083501081 | 0.935203663 | 0.935203663 | -5.628496454 |
| 1446550_at   | -0.009267133 | 7.819767757 | -0.083491692 | 0.935210931 | 0.935210931 | -5.628497212 |
| 1418954_at   | 0.005589877  | 7.302292516 | 0.083488811  | 0.93521316  | 0.93521316  | -5.628497444 |
| 1450826_a_at | 0.006621537  | 4.371086956 | 0.083451535  | 0.935242012 | 0.935242012 | -5.628500451 |
| 1416751_a_at | -0.005438702 | 8.736504914 | -0.083329653 | 0.93533635  | 0.93533635  | -5.628510274 |
| 1454725_at   | -0.010997429 | 9.98502114  | -0.083313274 | 0.935349028 | 0.935349028 | -5.628511592 |
| 1431387_at   | -0.006305662 | 3.414727746 | -0.083306272 | 0.935354447 | 0.935354447 | -5.628512156 |
| 1458548_at   | 0.007986108  | 3.955757219 | 0.083287499  | 0.935368978 | 0.935368978 | -5.628513667 |
| 1457812_at   | 0.051157763  | 5.973326573 | 0.083276493  | 0.935377497 | 0.935377497 | -5.628514553 |
| 1448775_at   | -0.008648203 | 4.600639993 | -0.083237075 | 0.935408007 | 0.935408007 | -5.628517725 |
| 1449123_at   | 0.006896079  | 3.825932347 | 0.083194175  | 0.935441213 | 0.935441213 | -5.628521175 |
| 1439803_at   | 0.00639084   | 5.225735409 | 0.083170151  | 0.935459807 | 0.935459807 | -5.628523106 |
| 1449321_x_at | 0.006072573  | 3.408729257 | 0.083165961  | 0.935463051 | 0.935463051 | -5.628523443 |
| 1433916_at   | 0.005221123  | 10.305108   | 0.083147843  | 0.935477075 | 0.935477075 | -5.628524899 |
| 1427791_a_at | -0.007625199 | 4.516491116 | -0.08306055  | 0.935544642 | 0.935544642 | -5.62853191  |
| 1459600_at   | 0.007283785  | 3.763275498 | 0.083058972  | 0.935545864 | 0.935545864 | -5.628532036 |
| 1458606_at   | 0.006939855  | 4.72674948  | 0.083052246  | 0.935551069 | 0.935551069 | -5.628532576 |
| 1456523_at   | -0.009825138 | 4.486241122 | -0.08301824  | 0.935577391 | 0.935577391 | -5.628535305 |
| 1441230_at   | -0.006898215 | 7.465245273 | -0.083010511 | 0.935583374 | 0.935583374 | -5.628535925 |
| 1416294_at   | -0.006184806 | 8.438012387 | -0.082996525 | 0.935594199 | 0.935594199 | -5.628537047 |
| 1432775_at   | 0.00550263   | 3.425344384 | 0.082971557  | 0.935613526 | 0.935613526 | -5.62853905  |
| 1458605_at   | -0.010479478 | 6.386348782 | -0.082955684 | 0.935625812 | 0.935625812 | -5.628540322 |
| 1447124_at   | 0.006853232  | 7.556920737 | 0.082914529  | 0.935657668 | 0.935657668 | -5.628543621 |
| 1459868_x_at | -0.007846967 | 5.742972099 | -0.082900364 | 0.935668632 | 0.935668632 | -5.628544756 |
| 1437675_at   | 0.011038829  | 6.535297759 | 0.082850451  | 0.935707267 | 0.935707267 | -5.628548753 |
| 1421763_at   | -0.006861927 | 5.038662435 | -0.082835552 | 0.9357188   | 0.9357188   | -5.628549946 |
| 1447045_at   | 0.005442825  | 3.100657451 | 0.08279333   | 0.935751481 | 0.935751481 | -5.628553325 |
| 1444440_at   | 0.006874571  | 4.712775893 | 0.082762548  | 0.935775308 | 0.935775308 | -5.628555788 |
| 1420861_at   | -0.005478836 | 9.354942839 | -0.082733185 | 0.935798037 | 0.935798037 | -5.628558136 |
| 1442394_at   | 0.007300969  | 3.460302123 | 0.082679776  | 0.935839379 | 0.935839379 | -5.628562405 |
| 1432861_at   | 0.007577815  | 3.585472319 | 0.082662919  | 0.935852427 | 0.935852427 | -5.628563752 |
| 1420568_at   | 0.007503565  | 4.849572261 | 0.082621935  | 0.935884151 | 0.935884151 | -5.628567025 |
| 1456446_at   | 0.005736455  | 4.071546283 | 0.082601332  | 0.9359001   | 0.9359001   | -5.62856867  |
| 1459930_at   | -0.010374716 | 4.036833506 | -0.082596344 | 0.935903961 | 0.935903961 | -5.628569068 |
| 1425912_at   | -0.008448427 | 5.557963064 | -0.082581146 | 0.935915725 | 0.935915725 | -5.628570281 |
| 1440003_at   | 0.006900117  | 4.755682975 | 0.082572646  | 0.935922304 | 0.935922304 | -5.62857096  |
| 1448675_at   | -0.006895695 | 5.93432598  | -0.082539851 | 0.93594769  | 0.93594769  | -5.628573576 |
| 1430442_at   | -0.007634053 | 4.287175404 | -0.082527297 | 0.935957408 | 0.935957408 | -5.628574578 |
| 1452873_at   | -0.007847169 | 6.76015037  | -0.082511247 | 0.935969831 | 0.935969831 | -5.628575858 |
| 1453482_at   | -0.007772194 | 4.742177155 | -0.082507251 | 0.935972925 | 0.935972925 | -5.628576176 |
| 1432615_at   | 0.00592777   | 4.427296548 | 0.082505689  | 0.935974134 | 0.935974134 | -5.628576301 |
| 1442772_at   | 0.006015653  | 5.594187602 | 0.082401249  | 0.936054978 | 0.936054978 | -5.628584623 |
| 1451604_a_at | 0.005231437  | 5.867481633 | 0.082385182  | 0.936067415 | 0.936067415 | -5.628585902 |
| 1456021_at   | 0.010653636  | 6.653120862 | 0.082366993  | 0.936081495 | 0.936081495 | -5.62858735  |
| 1417455_at   | -0.008142539 | 9.539043774 | -0.082312117 | 0.936123973 | 0.936123973 | -5.628591717 |
| 1418211_at   | -0.008245574 | 5.423663583 | -0.082263618 | 0.936161516 | 0.936161516 | -5.628595574 |
| 1425342_a_at | -0.00982457  | 4.105007843 | -0.082239537 | 0.936180157 | 0.936180157 | -5.628597488 |
| 1459492_at   | -0.005383994 | 3.403760933 | -0.082224824 | 0.936191546 | 0.936191546 | -5.628598658 |
| 1428150_at   | 0.009035791  | 6.005431491 | 0.082192422  | 0.936216628 | 0.936216628 | -5.628601232 |
| 1442693_at   | 0.017117519  | 5.634640654 | 0.082165184  | 0.936237713 | 0.936237713 | -5.628603395 |

|              |              |             |              |             |             |              |
|--------------|--------------|-------------|--------------|-------------|-------------|--------------|
| 1428130_at   | 0.011757672  | 10.24656157 | 0.082157642  | 0.936243551 | 0.936243551 | -5.628603994 |
| 1459920_at   | -0.006168896 | 6.717854045 | -0.082120134 | 0.936272587 | 0.936272587 | -5.628606972 |
| 1435073_a_at | -0.005230614 | 7.446080731 | -0.08211748  | 0.936274641 | 0.936274641 | -5.628607182 |
| 1417640_at   | 0.00807456   | 4.671284641 | 0.082111665  | 0.936279142 | 0.936279142 | -5.628607644 |
| 1418171_at   | -0.005873867 | 10.23613956 | -0.082081861 | 0.936302214 | 0.936302214 | -5.628610008 |
| 1420557_at   | 0.007690788  | 3.966522008 | 0.082052627  | 0.936324843 | 0.936324843 | -5.628612327 |
| 1423017_a_at | 0.005137466  | 5.085010297 | 0.082038624  | 0.936335683 | 0.936335683 | -5.628613437 |
| 1431068_at   | -0.006128121 | 6.925459361 | -0.082015758 | 0.936353384 | 0.936353384 | -5.62861525  |
| 1423509_a_at | 0.007460409  | 3.577660435 | 0.081951904  | 0.936402814 | 0.936402814 | -5.628620309 |
| 1432086_a_at | 0.006058223  | 4.578520443 | 0.081941203  | 0.936411098 | 0.936411098 | -5.628621157 |
| 1435212_at   | -0.007692812 | 5.766950804 | -0.081898367 | 0.936444258 | 0.936444258 | -5.628624548 |
| 1433030_at   | 0.008982554  | 3.929873934 | 0.081881745  | 0.936457125 | 0.936457125 | -5.628625864 |
| 1457679_at   | -0.012286831 | 3.726396735 | -0.081873981 | 0.936463135 | 0.936463135 | -5.628626478 |
| 1459251_at   | -0.007725903 | 4.294227094 | -0.081861486 | 0.936472808 | 0.936472808 | -5.628627467 |
| 1434755_at   | -0.005944073 | 6.27745181  | -0.081851036 | 0.936480898 | 0.936480898 | -5.628628293 |
| 1433349_at   | -0.008979323 | 4.195947319 | -0.081849788 | 0.936481864 | 0.936481864 | -5.628628392 |
| 1447926_at   | 0.007136336  | 7.94543233  | 0.081828913  | 0.936498024 | 0.936498024 | -5.628630043 |
| 1443154_at   | -0.010092001 | 4.026383134 | -0.081759727 | 0.936551582 | 0.936551582 | -5.628635512 |
| 1420640_at   | 0.005540579  | 7.474740608 | 0.081741815  | 0.936565448 | 0.936565448 | -5.628636928 |
| 1422078_at   | 0.007505535  | 6.367120771 | 0.08173443   | 0.936571165 | 0.936571165 | -5.628637511 |
| 1439029_at   | 0.006941587  | 7.127402197 | 0.081729544  | 0.936574947 | 0.936574947 | -5.628637897 |
| 1435541_at   | 0.011319962  | 4.843749947 | 0.081712448  | 0.936588181 | 0.936588181 | -5.628639247 |
| 1432479_at   | -0.008890051 | 4.184112451 | -0.081704882 | 0.936594038 | 0.936594038 | -5.628639844 |
| 1420704_at   | -0.012106093 | 5.314047329 | -0.081693184 | 0.936603094 | 0.936603094 | -5.628640768 |
| 1431165_at   | 0.006545815  | 5.203826131 | 0.081620987  | 0.936658985 | 0.936658985 | -5.628646466 |
| 1439400_x_at | -0.007669484 | 7.002407424 | -0.081587353 | 0.936685022 | 0.936685022 | -5.628649118 |
| 1452410_a_at | 0.006860825  | 7.470856186 | 0.081565879  | 0.936701646 | 0.936701646 | -5.628650811 |
| 1438061_at   | 0.006184595  | 4.676160031 | 0.081519989  | 0.936737171 | 0.936737171 | -5.628654428 |
| 1425158_at   | -0.006120511 | 3.637090599 | -0.081509688 | 0.936745145 | 0.936745145 | -5.628655239 |
| 1451465_at   | 0.008681026  | 7.348095293 | 0.081504588  | 0.936749094 | 0.936749094 | -5.628655641 |
| 1426902_at   | -0.006499634 | 8.177663146 | -0.081495302 | 0.936756282 | 0.936756282 | -5.628656372 |
| 1452755_at   | -0.008175695 | 6.561273765 | -0.081463952 | 0.936780551 | 0.936780551 | -5.628658841 |
| 1424445_at   | 0.007141214  | 4.219528029 | 0.081442634  | 0.936797055 | 0.936797055 | -5.628660519 |
| 1416902_a_at | -0.005554509 | 11.62425866 | -0.081371874 | 0.936851834 | 0.936851834 | -5.628666086 |
| 1452828_at   | 0.005530299  | 8.659207584 | 0.081371189  | 0.936852364 | 0.936852364 | -5.628666614 |
| 1430133_at   | -0.006030832 | 9.014102923 | -0.081340473 | 0.936876143 | 0.936876143 | -5.628668555 |
| 1422408_at   | 0.010674092  | 3.673558598 | 0.081317533  | 0.936893902 | 0.936893902 | -5.628670359 |
| 1449921_s_at | -0.006433887 | 6.79042569  | -0.08124411  | 0.936950743 | 0.936950743 | -5.628676126 |
| 1441163_at   | 0.007343542  | 3.682044164 | 0.081214053  | 0.936974012 | 0.936974012 | -5.628678486 |
| 1460662_at   | 0.010453132  | 4.303433435 | 0.081185961  | 0.936995759 | 0.936995759 | -5.62868069  |
| 1439322_at   | 0.010612805  | 5.496997625 | 0.081185582  | 0.936996053 | 0.936996053 | -5.62868072  |
| 1415833_x_at | 0.004877395  | 14.02641612 | 0.081126071  | 0.937042125 | 0.937042125 | -5.628685388 |
| 1443315_at   | 0.006909977  | 3.5410791   | 0.081108583  | 0.937055663 | 0.937055663 | -5.628686759 |
| 1450098_at   | -0.005995648 | 5.848019647 | -0.08110842  | 0.93705579  | 0.93705579  | -5.628686772 |
| 1419691_at   | 0.008633457  | 4.342436158 | 0.08098874   | 0.937148442 | 0.937148442 | -5.628696146 |
| 1427327_at   | -0.010025876 | 4.571563609 | -0.080864172 | 0.937244881 | 0.937244881 | -5.628705889 |
| 1426939_at   | 0.006439112  | 8.147020342 | 0.080832126  | 0.93726969  | 0.93726969  | -5.628708393 |
| 1438663_at   | 0.006556012  | 9.505605589 | 0.080801471  | 0.937293424 | 0.937293424 | -5.628710787 |
| 1454873_at   | -0.009839788 | 5.097498249 | -0.080778681 | 0.937311067 | 0.937311067 | -5.628712567 |
| 1443224_at   | 0.006966684  | 3.565574806 | 0.080749497  | 0.937333662 | 0.937333662 | -5.628714845 |
| 1447756_x_at | 0.005138938  | 3.730241043 | 0.080708386  | 0.937365489 | 0.937365489 | -5.628718052 |
| 1458131_at   | 0.006048183  | 5.358744111 | 0.08067311   | 0.9373928   | 0.9373928   | -5.628720803 |
| 1450072_at   | 0.006296739  | 9.17404205  | 0.080651122  | 0.937409823 | 0.937409823 | -5.628722517 |

|              |              |             |              |             |             |              |
|--------------|--------------|-------------|--------------|-------------|-------------|--------------|
| 1450994_at   | 0.00615357   | 9.829872938 | 0.080651079  | 0.937409857 | 0.937409857 | -5.628722521 |
| 1432705_at   | 0.006737264  | 3.897340574 | 0.080647791  | 0.937412402 | 0.937412402 | -5.628722777 |
| 1420384_at   | -0.015421508 | 7.185778757 | -0.080642695 | 0.937416347 | 0.937416347 | -5.628723174 |
| 1444097_at   | -0.008883633 | 5.966724728 | -0.080601927 | 0.93744791  | 0.93744791  | -5.628726351 |
| 1429249_at   | 0.010357064  | 4.68425869  | 0.080593336  | 0.937454561 | 0.937454561 | -5.62872702  |
| 1457966_at   | 0.007913842  | 9.196875564 | 0.080593031  | 0.937454798 | 0.937454798 | -5.628727044 |
| 1436193_at   | -0.008474251 | 7.906669145 | -0.080532908 | 0.937501345 | 0.937501345 | -5.628731725 |
| 1451841_a_at | -0.009033068 | 7.000320771 | -0.080513239 | 0.937516573 | 0.937516573 | -5.628733256 |
| 1437034_x_at | -0.006518092 | 6.356450521 | -0.080470575 | 0.937549604 | 0.937549604 | -5.628736575 |
| 1427845_at   | -0.007713271 | 4.15518951  | -0.080453336 | 0.937562951 | 0.937562951 | -5.628737915 |
| 1421151_a_at | 0.006645709  | 7.002959024 | 0.080411201  | 0.937595572 | 0.937595572 | -5.62874119  |
| 1449764_x_at | 0.005061621  | 3.282240606 | 0.08040729   | 0.9375986   | 0.9375986   | -5.628741494 |
| 1422460_at   | 0.006667618  | 9.971847706 | 0.080333356  | 0.937655841 | 0.937655841 | -5.628747237 |
| 1431113_at   | -0.006194316 | 6.232013192 | -0.080318177 | 0.937667594 | 0.937667594 | -5.628748416 |
| 1430153_at   | 0.00576026   | 3.667806896 | 0.080071262  | 0.937858763 | 0.937858763 | -5.628767553 |
| 1427940_s_at | 0.005667598  | 6.970158242 | 0.080056641  | 0.937870083 | 0.937870083 | -5.628768684 |
| 1421942_s_at | -0.007011677 | 5.191343132 | -0.080053441 | 0.937872561 | 0.937872561 | -5.628768932 |
| 1457558_at   | -0.006668623 | 3.731783601 | -0.079925941 | 0.937971278 | 0.937971278 | -5.628778789 |
| 1434398_at   | 0.005040971  | 6.818409241 | 0.079852606  | 0.938028058 | 0.938028058 | -5.628784451 |
| 1436587_at   | -0.008528736 | 6.026035875 | -0.079822455 | 0.938051402 | 0.938051402 | -5.628786778 |
| 1434414_at   | 0.006290974  | 7.101712844 | 0.079803984  | 0.938065703 | 0.938065703 | -5.628788202 |
| 1421560_at   | 0.005970987  | 4.744011896 | 0.079798039  | 0.938070307 | 0.938070307 | -5.628788661 |
| 1456200_at   | 0.006142275  | 7.069486139 | 0.079792552  | 0.938074555 | 0.938074555 | -5.628789084 |
| 1417593_at   | -0.005531969 | 7.899265389 | -0.079750039 | 0.938107471 | 0.938107471 | -5.628792362 |
| 1431015_at   | 0.006225877  | 7.248364747 | 0.07974859   | 0.938108593 | 0.938108593 | -5.628792474 |
| 1424026_s_at | -0.008043136 | 8.337934906 | -0.079718217 | 0.93813211  | 0.93813211  | -5.628794814 |
| 1441949_x_at | -0.00856859  | 4.722125677 | -0.079669373 | 0.938169928 | 0.938169928 | -5.628798576 |
| 1454156_at   | -0.006222613 | 8.028727558 | -0.079630946 | 0.938199681 | 0.938199681 | -5.628801534 |
| 1451926_at   | 0.006112758  | 3.576965563 | 0.079621228  | 0.938207205 | 0.938207205 | -5.628802282 |
| 1444788_x_at | -0.007857218 | 6.62222788  | -0.079582101 | 0.938237501 | 0.938237501 | -5.628805292 |
| 1445840_at   | -0.005838966 | 3.231984887 | -0.079558563 | 0.938255725 | 0.938255725 | -5.628807103 |
| 1442826_at   | 0.007092243  | 5.620808054 | 0.079555611  | 0.938258011 | 0.938258011 | -5.62880733  |
| 1445593_at   | 0.008011161  | 3.651643478 | 0.079543209  | 0.938267614 | 0.938267614 | -5.628808283 |
| 1438779_at   | 0.005625321  | 3.470280369 | 0.079523541  | 0.938282842 | 0.938282842 | -5.628809795 |
| 1418020_s_at | 0.006311376  | 7.849844419 | 0.079508175  | 0.93829474  | 0.93829474  | -5.628810976 |
| 1417538_at   | 0.00476612   | 8.787195907 | 0.079471032  | 0.938323499 | 0.938323499 | -5.628813829 |
| 1433367_at   | 0.006834084  | 3.806614438 | 0.079453061  | 0.938337413 | 0.938337413 | -5.628815209 |
| 1430997_at   | -0.005992323 | 4.825436804 | -0.079379602 | 0.938394292 | 0.938394292 | -5.628820848 |
| 1417585_at   | -0.007440202 | 7.477476273 | -0.079378092 | 0.938395461 | 0.938395461 | -5.628820964 |
| 1450740_a_at | 0.00521226   | 11.09757146 | 0.079373445  | 0.938399059 | 0.938399059 | -5.62882132  |
| 1443685_at   | -0.006606025 | 4.395413537 | -0.079306276 | 0.938451067 | 0.938451067 | -5.628826471 |
| 1434567_at   | -0.007540046 | 7.322011714 | -0.079230452 | 0.938509778 | 0.938509778 | -5.62883228  |
| 1435401_at   | -0.008999543 | 7.814814339 | -0.079214058 | 0.938522471 | 0.938522471 | -5.628833535 |
| 1420508_at   | 0.009713325  | 7.80912753  | 0.079171523  | 0.938555406 | 0.938555406 | -5.628836791 |
| 1429763_at   | -0.006273486 | 9.155789835 | -0.07908616  | 0.938621503 | 0.938621503 | -5.628843319 |
| 1458870_x_at | 0.008965086  | 5.24072856  | 0.079082747  | 0.938624146 | 0.938624146 | -5.62884358  |
| 1423025_a_at | 0.00609262   | 7.950210531 | 0.07903953   | 0.93865761  | 0.93865761  | -5.628846882 |
| 1415851_a_at | 0.005939265  | 11.15847465 | 0.079029492  | 0.938665382 | 0.938665382 | -5.628847649 |
| 1442571_at   | -0.007366161 | 3.271596964 | -0.079023366 | 0.938670126 | 0.938670126 | -5.628848117 |
| 1424635_at   | 0.004960147  | 14.13658015 | 0.07898481   | 0.93869998  | 0.93869998  | -5.628851061 |
| 1454515_at   | 0.0049648    | 3.845092139 | 0.078942746  | 0.938732551 | 0.938732551 | -5.628854271 |
| 1453802_at   | 0.006918681  | 5.84725291  | 0.078936619  | 0.938737295 | 0.938737295 | -5.628854739 |
| 1439457_x_at | -0.00869205  | 3.202395205 | -0.078922219 | 0.938748446 | 0.938748446 | -5.628855837 |

|              |              |             |              |             |             |              |
|--------------|--------------|-------------|--------------|-------------|-------------|--------------|
| 1430590_at   | -0.008853816 | 4.487895098 | -0.078920612 | 0.93874969  | 0.93874969  | -5.62885596  |
| 1460404_at   | 0.006950517  | 8.524333867 | 0.078906554  | 0.938760575 | 0.938760575 | -5.628857032 |
| 1420197_at   | 0.007607383  | 5.405802231 | 0.078902688  | 0.938763569 | 0.938763569 | -5.628857327 |
| 1437669_x_at | 0.006924813  | 3.939267465 | 0.078900689  | 0.938765116 | 0.938765116 | -5.628857479 |
| 1423068_at   | -0.006981487 | 8.794761981 | -0.078853369 | 0.938801757 | 0.938801757 | -5.628861087 |
| 1453360_a_at | -0.014368731 | 7.11110953  | -0.078843929 | 0.938809067 | 0.938809067 | -5.628861806 |
| 1431694_a_at | -0.005078827 | 8.264243448 | -0.078749281 | 0.938882356 | 0.938882356 | -5.628869014 |
| 1422993_s_at | 0.006167248  | 9.231924226 | 0.078697241  | 0.938922652 | 0.938922652 | -5.628872974 |
| 1420987_at   | -0.005646823 | 6.5807307   | -0.078641082 | 0.938966138 | 0.938966138 | -5.628877244 |
| 1459776_x_at | -0.006560311 | 5.081959813 | -0.078622827 | 0.938980274 | 0.938980274 | -5.628878631 |
| 1457329_at   | -0.006614088 | 4.272760506 | -0.078616325 | 0.938985308 | 0.938985308 | -5.628879125 |
| 1442065_at   | 0.006916475  | 5.357403554 | 0.078589456  | 0.939006114 | 0.939006114 | -5.628881166 |
| 1416370_at   | 0.005566244  | 8.502704048 | 0.078571421  | 0.939020079 | 0.939020079 | -5.628882536 |
| 1452936_at   | -0.006251584 | 4.779516272 | -0.07854548  | 0.939040166 | 0.939040166 | -5.628884506 |
| 1454669_at   | 0.005872939  | 8.918970763 | 0.078539645  | 0.939044685 | 0.939044685 | -5.628884949 |
| 1451734_a_at | 0.011153284  | 8.333454406 | 0.078495746  | 0.939078678 | 0.939078678 | -5.62888828  |
| 1417576_a_at | -0.007956866 | 5.348955508 | -0.078457024 | 0.939108663 | 0.939108663 | -5.628891217 |
| 1447089_at   | 0.005324586  | 4.002904094 | 0.078450292  | 0.939113876 | 0.939113876 | -5.628891727 |
| 1438561_x_at | 0.007427476  | 4.539727011 | 0.07844707   | 0.939116371 | 0.939116371 | -5.628891972 |
| 1445213_at   | -0.007574106 | 4.445676212 | -0.078430972 | 0.939128836 | 0.939128836 | -5.628893192 |
| 1419039_at   | 0.00770501   | 5.66606607  | 0.07842951   | 0.939129968 | 0.939129968 | -5.628893303 |
| 1452099_at   | -0.00586042  | 8.191281043 | -0.078414403 | 0.939141667 | 0.939141667 | -5.628894448 |
| 1436033_at   | 0.008798561  | 8.748222155 | 0.078399116  | 0.939153504 | 0.939153504 | -5.628895606 |
| 1439774_at   | 0.007784084  | 10.76088967 | 0.078392874  | 0.939158337 | 0.939158337 | -5.628896079 |
| 1450464_at   | -0.006821301 | 7.663318768 | -0.078360498 | 0.939183408 | 0.939183408 | -5.628898532 |
| 1422228_at   | -0.005559898 | 3.734259396 | -0.078259104 | 0.939261923 | 0.939261923 | -5.628906206 |
| 1456781_at   | -0.006464375 | 4.96394521  | -0.078228558 | 0.939285577 | 0.939285577 | -5.628908516 |
| 1438391_x_at | 0.006261104  | 8.889435827 | 0.078199388  | 0.939308165 | 0.939308165 | -5.628910721 |
| 1439057_x_at | 0.008800533  | 9.365047251 | 0.078179513  | 0.939323556 | 0.939323556 | -5.628912223 |
| 1457508_at   | 0.006877395  | 8.015744177 | 0.07813524   | 0.93935784  | 0.93935784  | -5.628915568 |
| 1424354_at   | 0.007901954  | 4.818221006 | 0.078127149  | 0.939364105 | 0.939364105 | -5.628916179 |
| 1438309_at   | 0.005526479  | 3.221294914 | 0.078035984  | 0.939434702 | 0.939434702 | -5.628923059 |
| 1460450_at   | -0.007724043 | 9.292273291 | -0.078029802 | 0.939439489 | 0.939439489 | -5.628923525 |
| 1451385_at   | -0.00554868  | 10.92069983 | -0.078023395 | 0.939444445 | 0.939444445 | -5.628924008 |
| 1451699_at   | 0.018618595  | 6.414230479 | 0.078023308  | 0.939444517 | 0.939444517 | -5.628924014 |
| 1417219_s_at | -0.007680168 | 10.81228725 | -0.078022597 | 0.939445068 | 0.939445068 | -5.628924068 |
| 1437278_a_at | 0.009738189  | 10.74061784 | 0.07801139   | 0.939453747 | 0.939453747 | -5.628924913 |
| 1416396_at   | -0.006584784 | 4.1834737   | -0.078010465 | 0.939454463 | 0.939454463 | -5.628924983 |
| 1451654_x_at | -0.006435692 | 7.464950717 | -0.077997261 | 0.939464688 | 0.939464688 | -5.628925978 |
| 1459846_x_at | -0.006632266 | 9.334326635 | -0.077978816 | 0.939478971 | 0.939478971 | -5.628927369 |
| 1447002_at   | 0.005646623  | 3.641864708 | 0.077850761  | 0.939578135 | 0.939578135 | -5.628937012 |
| 1418921_at   | 0.006068455  | 7.178436279 | 0.07784954   | 0.939579081 | 0.939579081 | -5.628937104 |
| 1433059_at   | -0.004828423 | 4.478666554 | -0.077756727 | 0.939650955 | 0.939650955 | -5.628944083 |
| 1438357_at   | 0.005208081  | 3.249156705 | 0.077741114  | 0.939663046 | 0.939663046 | -5.628945256 |
| 1427332_at   | 0.00598861   | 6.623860836 | 0.077734834  | 0.939667909 | 0.939667909 | -5.628945728 |
| 1434090_at   | -0.006337179 | 5.836707246 | -0.077724951 | 0.939675562 | 0.939675562 | -5.628946471 |
| 1457495_at   | -0.006808737 | 3.647078584 | -0.077720157 | 0.939679274 | 0.939679274 | -5.628946831 |
| 1434368_at   | -0.005914938 | 4.561905129 | -0.077567347 | 0.939797611 | 0.939797611 | -5.628958298 |
| 1419729_at   | 0.006104755  | 3.597601452 | 0.077557113  | 0.939805537 | 0.939805537 | -5.628959066 |
| 1423043_s_at | 0.006924671  | 12.18339389 | 0.0774994    | 0.939850231 | 0.939850231 | -5.62896339  |
| 1420101_at   | 0.005168559  | 3.153522424 | 0.077445084  | 0.939892294 | 0.939892294 | -5.628967457 |
| 1439234_a_at | -0.006523709 | 7.574505944 | -0.07736921  | 0.939951052 | 0.939951052 | -5.628973134 |
| 1454036_a_at | -0.004746775 | 8.67293049  | -0.077328134 | 0.939982862 | 0.939982862 | -5.628976205 |

|              |              |             |              |             |             |              |
|--------------|--------------|-------------|--------------|-------------|-------------|--------------|
| 1455230_at   | -0.006999948 | 6.513560421 | -0.077300345 | 0.940004383 | 0.940004383 | -5.628978281 |
| 1438551_at   | -0.007711529 | 3.393055105 | -0.07720515  | 0.940078105 | 0.940078105 | -5.628985389 |
| 1438377_x_at | -0.00697428  | 4.455791825 | -0.077097887 | 0.940161173 | 0.940161173 | -5.628993388 |
| 1437537_at   | -0.005326513 | 6.731076956 | -0.077085862 | 0.940170486 | 0.940170486 | -5.628994284 |
| 1426724_at   | -0.005779403 | 11.82408615 | -0.077083682 | 0.940172174 | 0.940172174 | -5.628994446 |
| 1430269_at   | -0.005239755 | 4.161496263 | -0.077078211 | 0.940176412 | 0.940176412 | -5.628994854 |
| 1427699_a_at | 0.011901544  | 5.667818987 | 0.077014825  | 0.9402255   | 0.9402255   | -5.628999574 |
| 1422549_at   | -0.006158804 | 8.83466689  | -0.07701481  | 0.940225512 | 0.940225512 | -5.628999575 |
| 1441993_at   | -0.005958234 | 6.587453693 | -0.07698009  | 0.940252401 | 0.940252401 | -5.629002159 |
| 1447111_at   | -0.006126526 | 3.385721913 | -0.076932017 | 0.940289631 | 0.940289631 | -5.629005735 |
| 1420068_at   | 0.01035837   | 4.032969919 | 0.07691279   | 0.940304522 | 0.940304522 | -5.629007164 |
| 1431367_at   | -0.005321453 | 4.187377373 | -0.076889638 | 0.940322451 | 0.940322451 | -5.629008885 |
| 1438678_at   | -0.006400468 | 8.319003979 | -0.076868355 | 0.940338935 | 0.940338935 | -5.629010467 |
| 1415925_a_at | 0.00679749   | 9.823330203 | 0.076854832  | 0.940349407 | 0.940349407 | -5.629011471 |
| 1429782_at   | -0.007318959 | 6.622924817 | -0.076850231 | 0.940352971 | 0.940352971 | -5.629011813 |
| 1421985_a_at | -0.004923164 | 10.01472999 | -0.076844012 | 0.940357787 | 0.940357787 | -5.629012275 |
| 1452280_at   | 0.008184599  | 10.34831641 | 0.076806767  | 0.940386632 | 0.940386632 | -5.62901504  |
| 1431456_at   | 0.006863365  | 4.492819482 | 0.076787368  | 0.940401656 | 0.940401656 | -5.62901648  |
| 1449967_at   | -0.005686196 | 3.586141069 | -0.076746983 | 0.940432932 | 0.940432932 | -5.629019477 |
| 1437890_at   | -0.00866747  | 4.459564096 | -0.076722735 | 0.940451712 | 0.940451712 | -5.629021275 |
| 1426185_at   | 0.00844853   | 3.479084373 | 0.076718773  | 0.94045478  | 0.94045478  | -5.629021569 |
| 1439182_at   | 0.006203662  | 3.886713181 | 0.076715761  | 0.940457113 | 0.940457113 | -5.629021792 |
| 1449067_at   | 0.008477503  | 3.597875436 | 0.076696514  | 0.940472019 | 0.940472019 | -5.629023219 |
| 1444929_at   | 0.008453851  | 4.41551678  | 0.076696076  | 0.940472358 | 0.940472358 | -5.629023252 |
| 1426384_a_at | -0.010294215 | 11.21704182 | -0.076680903 | 0.940484109 | 0.940484109 | -5.629024376 |
| 1445852_at   | -0.007998841 | 4.324930825 | -0.076567804 | 0.940571701 | 0.940571701 | -5.629032753 |
| 1422440_at   | -0.006178916 | 10.72877212 | -0.076552709 | 0.940583392 | 0.940583392 | -5.62903387  |
| 1439326_at   | -0.008200072 | 6.497201527 | -0.076551735 | 0.940584146 | 0.940584146 | -5.629033942 |
| 1417438_at   | -0.004985038 | 8.734688709 | -0.076532476 | 0.940599062 | 0.940599062 | -5.629035367 |
| 1432869_at   | 0.005754583  | 3.69427836  | 0.076507858  | 0.940618128 | 0.940618128 | -5.629037187 |
| 1449624_at   | -0.006534719 | 5.449701483 | -0.076491287 | 0.940630962 | 0.940630962 | -5.629038413 |
| 1416089_at   | 0.005064177  | 13.08340543 | 0.076336762  | 0.94075064  | 0.94075064  | -5.629049825 |
| 1457245_at   | 0.006844074  | 3.658362075 | 0.076334067  | 0.940752727 | 0.940752727 | -5.629050024 |
| 1426888_at   | -0.011536237 | 8.02830125  | -0.076308055 | 0.940772873 | 0.940772873 | -5.629051943 |
| 1429111_at   | 0.005223022  | 8.468737793 | 0.076293039  | 0.940784502 | 0.940784502 | -5.62905305  |
| 1454807_a_at | -0.004850129 | 8.538535356 | -0.076271731 | 0.940801005 | 0.940801005 | -5.629054621 |
| 1443269_at   | -0.008851437 | 6.381812578 | -0.076234291 | 0.940830003 | 0.940830003 | -5.629057381 |
| 1434875_a_at | 0.007003292  | 10.96890441 | 0.0762161    | 0.940844091 | 0.940844091 | -5.629058721 |
| 1424665_at   | -0.008724536 | 8.088341399 | -0.076213347 | 0.940846224 | 0.940846224 | -5.629058924 |
| 1453411_at   | 0.005970917  | 5.136880297 | 0.076212345  | 0.940847    | 0.940847    | -5.629058998 |
| 1459845_at   | -0.008331818 | 5.497418865 | -0.076189102 | 0.940865001 | 0.940865001 | -5.62906071  |
| 1435456_at   | -0.008805427 | 9.525877806 | -0.076172165 | 0.940878119 | 0.940878119 | -5.629061957 |
| 1417479_at   | 0.007223421  | 6.387234051 | 0.076107251  | 0.940928396 | 0.940928396 | -5.629066734 |
| 1457390_at   | 0.009067219  | 6.389827086 | 0.076105471  | 0.940929775 | 0.940929775 | -5.629066865 |
| 1430261_at   | 0.006474004  | 3.592698485 | 0.076079137  | 0.94095017  | 0.94095017  | -5.629068802 |
| 1426084_a_at | 0.005587114  | 7.849846683 | 0.07604703   | 0.940975037 | 0.940975037 | -5.629071162 |
| 1447442_at   | -0.00795371  | 4.74961257  | -0.076045637 | 0.940976116 | 0.940976116 | -5.629071265 |
| 1435120_at   | 0.007359723  | 8.871657505 | 0.076027615  | 0.940990075 | 0.940990075 | -5.629072589 |
| 1443262_at   | 0.008305905  | 4.62720126  | 0.075951522  | 0.941049009 | 0.941049009 | -5.629078178 |
| 1423087_a_at | 0.011996143  | 10.13327581 | 0.075934505  | 0.941062189 | 0.941062189 | -5.629079427 |
| 1426811_at   | -0.006542838 | 6.862916981 | -0.075920912 | 0.941072717 | 0.941072717 | -5.629080424 |
| 1443976_at   | -0.006503475 | 6.258191722 | -0.075882213 | 0.941102691 | 0.941102691 | -5.629083264 |
| 1442771_at   | -0.006044465 | 6.370432285 | -0.075864436 | 0.941116459 | 0.941116459 | -5.629084567 |

|              |              |             |              |             |             |              |
|--------------|--------------|-------------|--------------|-------------|-------------|--------------|
| 1437249_at   | -0.007286072 | 3.856168635 | -0.075838921 | 0.941136221 | 0.941136221 | -5.629086438 |
| 1447142_at   | 0.007648311  | 3.206357941 | 0.075794542  | 0.941170594 | 0.941170594 | -5.62908969  |
| 1438523_x_at | 0.005110474  | 5.642013202 | 0.075771056  | 0.941188785 | 0.941188785 | -5.62909141  |
| 1416861_at   | 0.004660212  | 9.152156471 | 0.075738662  | 0.941213875 | 0.941213875 | -5.629093782 |
| 1433718_a_at | -0.010293531 | 10.21285339 | -0.075717242 | 0.941230465 | 0.941230465 | -5.62909535  |
| 1417898_a_at | -0.007419998 | 4.551620717 | -0.075707162 | 0.941238272 | 0.941238272 | -5.629096088 |
| 1438576_x_at | -0.008763996 | 5.584536728 | -0.075705826 | 0.941239307 | 0.941239307 | -5.629096185 |
| 1457612_at   | 0.008250946  | 7.007607919 | 0.075696068  | 0.941246865 | 0.941246865 | -5.6290969   |
| 1439367_x_at | -0.007092333 | 9.703934896 | -0.075693444 | 0.941248898 | 0.941248898 | -5.629097092 |
| 1441911_x_at | 0.007204285  | 5.200180859 | 0.075655504  | 0.941278283 | 0.941278283 | -5.629099867 |
| 1418223_at   | -0.006041105 | 11.11965093 | -0.075648061 | 0.941284048 | 0.941284048 | -5.629100411 |
| 1420634_a_at | 0.005363836  | 8.941190914 | 0.075641126  | 0.94128942  | 0.94128942  | -5.629100918 |
| 1429528_at   | 0.005336736  | 9.81455321  | 0.075623541  | 0.94130304  | 0.94130304  | -5.629102203 |
| 1456661_at   | -0.005565908 | 7.612520969 | -0.075614708 | 0.941309882 | 0.941309882 | -5.629102849 |
| 1445303_at   | 0.004695641  | 3.767478708 | 0.075600738  | 0.941320702 | 0.941320702 | -5.62910387  |
| 1428471_at   | 0.007849649  | 8.203093615 | 0.075563477  | 0.941349562 | 0.941349562 | -5.629106592 |
| 1456058_at   | 0.005235498  | 8.988959973 | 0.075561256  | 0.941351282 | 0.941351282 | -5.629106754 |
| 1431811_a_at | -0.004930426 | 8.49846339  | -0.07556098  | 0.941351496 | 0.941351496 | -5.629106774 |
| 1449334_at   | 0.006052605  | 8.169731162 | 0.075560354  | 0.941351981 | 0.941351981 | -5.62910682  |
| 1421348_a_at | -0.006150825 | 3.553450328 | -0.075559415 | 0.941352708 | 0.941352708 | -5.629106889 |
| 1458805_at   | -0.007376861 | 3.730590444 | -0.07544689  | 0.941439864 | 0.941439864 | -5.629115101 |
| 1459901_at   | -0.007172589 | 7.194308483 | -0.075422096 | 0.941459068 | 0.941459068 | -5.629116908 |
| 1426538_a_at | 0.007421981  | 7.960481917 | 0.075412123  | 0.941466792 | 0.941466792 | -5.629117635 |
| 1440463_at   | 0.00821323   | 3.842032941 | 0.075399633  | 0.941476467 | 0.941476467 | -5.629118546 |
| 1424511_at   | 0.005537035  | 8.820883473 | 0.075305764  | 0.941549173 | 0.941549173 | -5.629125382 |
| 1417322_at   | -0.004891515 | 7.873726104 | -0.075268458 | 0.94157807  | 0.94157807  | -5.629128097 |
| 1457400_at   | -0.007936559 | 5.451962608 | -0.075232212 | 0.941606144 | 0.941606144 | -5.629130733 |
| 1450152_at   | 0.009018193  | 5.027150287 | 0.075218809  | 0.941616525 | 0.941616525 | -5.629131708 |
| 1452932_at   | 0.005796344  | 5.697495256 | 0.075172244  | 0.941652593 | 0.941652593 | -5.629135092 |
| 1428727_at   | 0.005759921  | 8.683857149 | 0.075151388  | 0.941668748 | 0.941668748 | -5.629136608 |
| 1456017_x_at | 0.00520974   | 3.500902052 | 0.075114642  | 0.94169721  | 0.94169721  | -5.629139276 |
| 1447600_at   | -0.008905878 | 3.733003897 | -0.075055108 | 0.941743323 | 0.941743323 | -5.629143597 |
| 1426043_a_at | -0.009742497 | 4.680509995 | -0.075047493 | 0.941749222 | 0.941749222 | -5.629144149 |
| 1416041_at   | -0.009380348 | 8.25295008  | -0.075043278 | 0.941752487 | 0.941752487 | -5.629144455 |
| 1424326_at   | -0.005697135 | 8.225490047 | -0.075030902 | 0.941762073 | 0.941762073 | -5.629145353 |
| 1458366_at   | 0.006359151  | 4.890329777 | 0.075028686  | 0.941763789 | 0.941763789 | -5.629145513 |
| 1451755_a_at | 0.008114797  | 6.607797095 | 0.074970665  | 0.941808731 | 0.941808731 | -5.629149719 |
| 1424510_at   | -0.007004755 | 5.041435155 | -0.074949299 | 0.941825281 | 0.941825281 | -5.629151267 |
| 1422791_at   | -0.004425269 | 8.935549609 | -0.074933678 | 0.94183738  | 0.94183738  | -5.629152399 |
| 1458660_at   | 0.005322391  | 5.044276478 | 0.074913678  | 0.941852872 | 0.941852872 | -5.629153847 |
| 1440196_at   | -0.009185137 | 4.470757603 | -0.074870152 | 0.941886587 | 0.941886587 | -5.629156998 |
| 1453880_s_at | 0.005797747  | 3.668165289 | 0.074864166  | 0.941891224 | 0.941891224 | -5.629157431 |
| 1439112_at   | -0.00723919  | 3.669373626 | -0.074858432 | 0.941895665 | 0.941895665 | -5.629157846 |
| 1442437_at   | -0.006480178 | 3.296960928 | -0.074848213 | 0.94190358  | 0.94190358  | -5.629158585 |
| 1437366_at   | 0.008256513  | 5.626384626 | 0.074734258  | 0.941991849 | 0.941991849 | -5.629166823 |
| 1420817_at   | -0.005918808 | 9.74868142  | -0.074732252 | 0.941993403 | 0.941993403 | -5.629166968 |
| 1456076_at   | 0.005893934  | 3.288224083 | 0.074657655  | 0.942051185 | 0.942051185 | -5.629172354 |
| 1426773_at   | -0.004972174 | 8.027652251 | -0.074657329 | 0.942051438 | 0.942051438 | -5.629172378 |
| 1418295_s_at | 0.005144257  | 8.254916348 | 0.07460744   | 0.942090082 | 0.942090082 | -5.629175976 |
| 1429529_at   | 0.005300247  | 6.458292579 | 0.074515819  | 0.942161052 | 0.942161052 | -5.629182579 |
| 1441349_at   | 0.005401435  | 7.558292863 | 0.074496621  | 0.942175924 | 0.942175924 | -5.629183962 |
| 1448032_at   | 0.006739652  | 6.915420735 | 0.074488619  | 0.942182122 | 0.942182122 | -5.629184538 |
| 1424811_at   | 0.00557766   | 3.427425639 | 0.074475663  | 0.942192158 | 0.942192158 | -5.629185471 |

|              |              |             |              |             |             |              |
|--------------|--------------|-------------|--------------|-------------|-------------|--------------|
| 1423663_at   | -0.006532142 | 8.107555473 | -0.074421982 | 0.942233739 | 0.942233739 | -5.629189334 |
| 1453681_at   | -0.004783723 | 7.928779397 | -0.074371169 | 0.9422731   | 0.9422731   | -5.629192988 |
| 1432229_a_at | -0.007829746 | 5.887699908 | -0.074280189 | 0.942343576 | 0.942343576 | -5.629199524 |
| 1432626_at   | -0.006774479 | 5.593858474 | -0.074269552 | 0.942351815 | 0.942351815 | -5.629200288 |
| 1448627_s_at | -0.005462864 | 9.867046158 | -0.074227344 | 0.94238451  | 0.94238451  | -5.629203317 |
| 1453689_at   | 0.007968994  | 6.852510485 | 0.074223565  | 0.942387438 | 0.942387438 | -5.629203588 |
| 1440610_at   | 0.005541038  | 3.580639688 | 0.074217457  | 0.94239217  | 0.94239217  | -5.629204026 |
| 1435155_at   | 0.005984384  | 6.104349859 | 0.07420494   | 0.942401865 | 0.942401865 | -5.629204924 |
| 1438830_at   | -0.009426148 | 4.689565371 | -0.074167768 | 0.94243066  | 0.94243066  | -5.62920759  |
| 1439616_at   | -0.01130822  | 6.871883893 | -0.074103581 | 0.942480381 | 0.942480381 | -5.629212189 |
| 1436461_at   | -0.007312141 | 3.639388354 | -0.074074351 | 0.942503024 | 0.942503024 | -5.629214282 |
| 1454168_a_at | 0.00654202   | 5.092404965 | 0.074057855  | 0.942515803 | 0.942515803 | -5.629215463 |
| 1435570_s_at | -0.00597114  | 3.94401616  | -0.074008727 | 0.942553859 | 0.942553859 | -5.629218979 |
| 1441533_at   | -0.004667163 | 3.061585062 | -0.074007655 | 0.942554689 | 0.942554689 | -5.629219055 |
| 1440837_at   | 0.00640186   | 3.243295816 | 0.073996734  | 0.942563149 | 0.942563149 | -5.629219837 |
| 1428710_at   | -0.005422942 | 6.333703618 | -0.073992513 | 0.942566419 | 0.942566419 | -5.629220139 |
| 1421230_a_at | 0.008404354  | 6.563351822 | 0.073985931  | 0.942571518 | 0.942571518 | -5.629220609 |
| 1458766_at   | -0.005364471 | 3.776844052 | -0.073955062 | 0.94259543  | 0.94259543  | -5.629222816 |
| 1417109_at   | 0.006579731  | 7.436272997 | 0.073911593  | 0.942629103 | 0.942629103 | -5.629225923 |
| 1451203_at   | -0.013478948 | 5.812134697 | -0.073875379 | 0.942657156 | 0.942657156 | -5.629228509 |
| 1454304_at   | -0.008574824 | 6.199124724 | -0.073832509 | 0.942690366 | 0.942690366 | -5.62923157  |
| 1443562_at   | -0.005188608 | 3.347841057 | -0.073793908 | 0.942720268 | 0.942720268 | -5.629234324 |
| 1460681_at   | 0.006498843  | 7.131400841 | 0.073740525  | 0.942761621 | 0.942761621 | -5.62923813  |
| 1456375_x_at | -0.005612716 | 10.21859885 | -0.073730009 | 0.942769768 | 0.942769768 | -5.62923888  |
| 1417002_at   | -0.005438416 | 10.28148716 | -0.07372367  | 0.942774678 | 0.942774678 | -5.629239331 |
| 1459766_x_at | 0.006752623  | 11.07498878 | 0.073719125  | 0.9427782   | 0.9427782   | -5.629239655 |
| 1433336_at   | 0.005911792  | 4.570319608 | 0.073709785  | 0.942785435 | 0.942785435 | -5.629240321 |
| 1425701_a_at | -0.005789475 | 8.387537712 | -0.07365828  | 0.942825334 | 0.942825334 | -5.629243989 |
| 1432113_at   | -0.006444    | 3.331078085 | -0.073623719 | 0.942852106 | 0.942852106 | -5.629246449 |
| 1452646_at   | -0.005792402 | 8.443689399 | -0.07360002  | 0.942870466 | 0.942870466 | -5.629248135 |
| 1439008_at   | -0.006465155 | 7.429072607 | -0.073570864 | 0.942893052 | 0.942893052 | -5.629250209 |
| 1453396_at   | -0.00635761  | 4.50508059  | -0.073568733 | 0.942894703 | 0.942894703 | -5.629250361 |
| 1435127_a_at | -0.004934809 | 7.715926354 | -0.073554854 | 0.942905454 | 0.942905454 | -5.629251347 |
| 1415943_at   | 0.00868764   | 10.77560109 | 0.073492795  | 0.94295353  | 0.94295353  | -5.629255758 |
| 1421473_at   | 0.004874154  | 3.551330948 | 0.073471184  | 0.942970271 | 0.942970271 | -5.629257293 |
| 1454859_a_at | 0.004499488  | 14.32252968 | 0.073469577  | 0.942971516 | 0.942971516 | -5.629257407 |
| 1444878_at   | 0.008476375  | 4.456676211 | 0.073422338  | 0.943008111 | 0.943008111 | -5.629260761 |
| 1459315_at   | -0.006094928 | 6.753842511 | -0.073416194 | 0.943012871 | 0.943012871 | -5.629261197 |
| 1455981_at   | 0.008146773  | 8.891356109 | 0.0733799    | 0.943040987 | 0.943040987 | -5.629263772 |
| 1440163_at   | -0.009488991 | 7.96860079  | -0.073364753 | 0.943052721 | 0.943052721 | -5.629264846 |
| 1445294_at   | 0.005294018  | 3.315859334 | 0.073298159  | 0.94310431  | 0.94310431  | -5.629269566 |
| 1429880_at   | 0.007627133  | 5.870658506 | 0.073286625  | 0.943113246 | 0.943113246 | -5.629270383 |
| 1442670_at   | -0.005499757 | 5.919723009 | -0.073281694 | 0.943117065 | 0.943117065 | -5.629270732 |
| 1431153_at   | 0.006773852  | 5.953274775 | 0.073270681  | 0.943125597 | 0.943125597 | -5.629271513 |
| 1445845_at   | 0.006545027  | 3.583809405 | 0.073199187  | 0.943180983 | 0.943180983 | -5.629276574 |
| 1426363_x_at | -0.006838362 | 9.701228988 | -0.07315721  | 0.943213502 | 0.943213502 | -5.629279543 |
| 1422754_at   | -0.007301593 | 7.04972941  | -0.073141521 | 0.943225657 | 0.943225657 | -5.629280652 |
| 1438750_at   | 0.005721764  | 7.081527354 | 0.073118167  | 0.943243749 | 0.943243749 | -5.629282303 |
| 1438631_x_at | -0.00820397  | 8.078326804 | -0.073056781 | 0.943291304 | 0.943291304 | -5.62928664  |
| 1425259_x_at | 0.005439199  | 3.146720705 | 0.073008923  | 0.94332838  | 0.94332838  | -5.629290018 |
| 1439945_at   | 0.005799322  | 8.218219323 | 0.073007443  | 0.943329527 | 0.943329527 | -5.629290122 |
| 1440945_at   | -0.006317552 | 4.047728675 | -0.072986686 | 0.943345607 | 0.943345607 | -5.629291587 |
| 1448708_at   | 0.005442771  | 9.156920099 | 0.072952703  | 0.943371934 | 0.943371934 | -5.629293984 |

|              |              |             |              |             |             |              |
|--------------|--------------|-------------|--------------|-------------|-------------|--------------|
| 1416031_s_at | 0.005165709  | 9.804976626 | 0.072946832  | 0.943376482 | 0.943376482 | -5.629294398 |
| 1442053_at   | -0.006702006 | 6.252395802 | -0.072915331 | 0.943400887 | 0.943400887 | -5.629296619 |
| 1458418_at   | 0.006936174  | 3.920970317 | 0.072895831  | 0.943415994 | 0.943415994 | -5.629297993 |
| 1419435_at   | 0.008167154  | 4.098708668 | 0.072867257  | 0.94343813  | 0.94343813  | -5.629300006 |
| 1450532_at   | 0.007428787  | 4.786424044 | 0.072860037  | 0.943443724 | 0.943443724 | -5.629300514 |
| 1434812_s_at | 0.008156842  | 6.982008887 | 0.072854727  | 0.943447837 | 0.943447837 | -5.629300888 |
| 1438834_at   | 0.00746092   | 6.736478275 | 0.072781586  | 0.943504501 | 0.943504501 | -5.629306036 |
| 1451057_x_at | -0.006655468 | 7.807171282 | -0.072762204 | 0.943519516 | 0.943519516 | -5.6293074   |
| 1440473_at   | -0.007494548 | 3.818574335 | -0.07275987  | 0.943521325 | 0.943521325 | -5.629307564 |
| 1429631_at   | 0.005242035  | 6.854605924 | 0.072715129  | 0.943555986 | 0.943555986 | -5.62931071  |
| 1427413_a_at | -0.005721741 | 9.829670946 | -0.072699754 | 0.943567898 | 0.943567898 | -5.62931179  |
| 1434005_at   | 0.004563027  | 10.68873369 | 0.072697517  | 0.943569631 | 0.943569631 | -5.629311947 |
| 1427918_a_at | 0.006008721  | 11.18310945 | 0.072668894  | 0.943591806 | 0.943591806 | -5.629313958 |
| 1445980_at   | -0.006551137 | 3.580170663 | -0.072610837 | 0.943636784 | 0.943636784 | -5.629318035 |
| 1457308_at   | 0.009419489  | 4.724335823 | 0.072606968  | 0.943639782 | 0.943639782 | -5.629318306 |
| 1450478_a_at | -0.004682307 | 8.219497545 | -0.072585365 | 0.943656518 | 0.943656518 | -5.629319822 |
| 1445528_at   | -0.004897775 | 3.049982826 | -0.072562606 | 0.94367415  | 0.94367415  | -5.629321419 |
| 1442790_at   | 0.008332643  | 4.022373874 | 0.072531343  | 0.943698371 | 0.943698371 | -5.629323611 |
| 1456770_at   | 0.008399969  | 5.993914208 | 0.072470943  | 0.943745164 | 0.943745164 | -5.629327844 |
| 1444765_at   | 0.007211029  | 5.29137021  | 0.072458546  | 0.943754769 | 0.943754769 | -5.629328712 |
| 1457224_at   | 0.005799205  | 3.606059943 | 0.072426679  | 0.943779458 | 0.943779458 | -5.629330944 |
| 1429686_at   | 0.006502148  | 7.136211184 | 0.072351328  | 0.943837835 | 0.943837835 | -5.629336216 |
| 1426430_at   | 0.005477041  | 7.238199203 | 0.072308189  | 0.943871257 | 0.943871257 | -5.629339232 |
| 1457559_at   | -0.005647259 | 8.914483392 | -0.072291427 | 0.943884243 | 0.943884243 | -5.629340404 |
| 1426703_at   | -0.006130368 | 8.204975257 | -0.072269998 | 0.943900845 | 0.943900845 | -5.629341901 |
| 1427519_at   | 0.00566273   | 5.314607663 | 0.072139617  | 0.944001859 | 0.944001859 | -5.629351001 |
| 1425000_s_at | 0.005481958  | 4.911284376 | 0.072115764  | 0.944020339 | 0.944020339 | -5.629352664 |
| 1448067_at   | 0.006088323  | 5.483192584 | 0.072091164  | 0.944039399 | 0.944039399 | -5.629354378 |
| 1434041_at   | 0.006464765  | 7.861567305 | 0.072069638  | 0.944056076 | 0.944056076 | -5.629355878 |
| 1434972_x_at | 0.006467026  | 11.85218426 | 0.072050495  | 0.944070907 | 0.944070907 | -5.629357211 |
| 1436196_at   | -0.006778777 | 5.837595641 | -0.072024877 | 0.944090755 | 0.944090755 | -5.629358995 |
| 1432406_at   | 0.005961651  | 3.956966228 | 0.072020426  | 0.944094204 | 0.944094204 | -5.629359305 |
| 1420029_at   | 0.005639526  | 4.896811374 | 0.072013655  | 0.94409945  | 0.94409945  | -5.629359777 |
| 1437981_x_at | 0.005554259  | 4.53493119  | 0.071990453  | 0.944117426 | 0.944117426 | -5.629361391 |
| 1423863_at   | 0.005300666  | 8.486627538 | 0.071968784  | 0.944134214 | 0.944134214 | -5.629362899 |
| 1449179_at   | -0.009167758 | 3.707727699 | -0.07195882  | 0.944141934 | 0.944141934 | -5.629363592 |
| 1460542_s_at | -0.005535455 | 8.709523276 | -0.071919814 | 0.944172155 | 0.944172155 | -5.629366305 |
| 1436768_x_at | 0.006830839  | 8.130860071 | 0.071874708  | 0.944207101 | 0.944207101 | -5.629369439 |
| 1433524_at   | 0.008403602  | 7.648748994 | 0.071868063  | 0.94421225  | 0.94421225  | -5.629369901 |
| 1422412_x_at | 0.005958351  | 3.276422465 | 0.071743106  | 0.944309064 | 0.944309064 | -5.629378574 |
| 1421314_at   | 0.005618692  | 5.919891525 | 0.071664368  | 0.94437007  | 0.94437007  | -5.629384031 |
| 1452225_at   | -0.005294293 | 9.710376882 | -0.071623378 | 0.944401828 | 0.944401828 | -5.62938687  |
| 1446078_at   | 0.007752859  | 4.407263626 | 0.071607862  | 0.944413849 | 0.944413849 | -5.629387944 |
| 1446778_at   | 0.005869884  | 4.985835809 | 0.071595229  | 0.944423638 | 0.944423638 | -5.629388819 |
| 1418559_at   | -0.007336372 | 3.980734385 | -0.071589889 | 0.944427775 | 0.944427775 | -5.629389188 |
| 1417283_at   | -0.0077738   | 6.021446735 | -0.071571612 | 0.944441936 | 0.944441936 | -5.629390453 |
| 1425094_a_at | -0.012115698 | 9.275609708 | -0.071513733 | 0.94448678  | 0.94448678  | -5.629394455 |
| 1444294_at   | -0.007398815 | 5.404115239 | -0.071511203 | 0.94448874  | 0.94448874  | -5.62939463  |
| 1447982_at   | -0.005782071 | 8.182449946 | -0.071507378 | 0.944491704 | 0.944491704 | -5.629394895 |
| 1427556_at   | 0.005667986  | 5.516957312 | 0.071493742  | 0.944502269 | 0.944502269 | -5.629395837 |
| 1444252_at   | 0.006200469  | 3.99432895  | 0.071492801  | 0.944502998 | 0.944502998 | -5.629395902 |
| 1459188_at   | -0.004415859 | 3.765592959 | -0.071436378 | 0.944546714 | 0.944546714 | -5.6293998   |
| 1438442_at   | -0.007941469 | 6.869451795 | -0.071421381 | 0.944558334 | 0.944558334 | -5.629400835 |



|              |              |             |              |             |             |              |
|--------------|--------------|-------------|--------------|-------------|-------------|--------------|
| 1416806_at   | 0.00468864   | 6.501722264 | 0.071415449  | 0.944562931 | 0.944562931 | -5.629401245 |
| 1422536_at   | -0.008518288 | 5.593409711 | -0.071397734 | 0.944576656 | 0.944576656 | -5.629402467 |
| 1415801_at   | 0.006993011  | 8.319158915 | 0.071395323  | 0.944578524 | 0.944578524 | -5.629402634 |
| 1454130_at   | 0.006763217  | 5.874343578 | 0.071373503  | 0.94459543  | 0.94459543  | -5.62940414  |
| 1423914_at   | 0.004854533  | 6.151270946 | 0.07135864   | 0.944606946 | 0.944606946 | -5.629405165 |
| 1448455_at   | -0.005617903 | 7.274088989 | -0.071339298 | 0.944621933 | 0.944621933 | -5.629406499 |
| 1419645_at   | 0.006072276  | 9.767849708 | 0.071279715  | 0.944668098 | 0.944668098 | -5.629410606 |
| 1440968_at   | -0.007780465 | 4.08129037  | -0.071268    | 0.944677175 | 0.944677175 | -5.629411413 |
| 1452669_at   | 0.007871044  | 9.104444264 | 0.071227267  | 0.944708736 | 0.944708736 | -5.629414218 |
| 1431111_at   | -0.008978572 | 4.128036226 | -0.071206361 | 0.944724934 | 0.944724934 | -5.629415657 |
| 1427134_at   | 0.004990015  | 9.67751077  | 0.071192388  | 0.94473576  | 0.94473576  | -5.629416619 |
| 1456492_at   | 0.005855759  | 7.977184044 | 0.071186335  | 0.94474045  | 0.94474045  | -5.629417036 |
| 1426379_at   | -0.005678599 | 9.76176781  | -0.071183616 | 0.944742557 | 0.944742557 | -5.629417223 |
| 1443055_at   | 0.006583828  | 3.613965469 | 0.071140438  | 0.944776012 | 0.944776012 | -5.629420193 |
| 1447753_at   | -0.00653236  | 4.825649994 | -0.071112594 | 0.944797586 | 0.944797586 | -5.629422107 |
| 1456355_s_at | -0.004530199 | 7.812390418 | -0.071065802 | 0.944833842 | 0.944833842 | -5.629425323 |
| 1430767_a_at | 0.005562404  | 3.273253467 | 0.071055537  | 0.944841795 | 0.944841795 | -5.629426028 |
| 1458455_at   | 0.005712561  | 3.903431054 | 0.071051264  | 0.944845107 | 0.944845107 | -5.629426321 |
| 1446989_at   | -0.006396792 | 3.200787662 | -0.071030816 | 0.94486095  | 0.94486095  | -5.629427725 |
| 1419449_a_at | 0.008538858  | 10.67010666 | 0.07097579   | 0.944903585 | 0.944903585 | -5.629431502 |
| 1434149_at   | -0.008315364 | 9.085444859 | -0.070943978 | 0.944928234 | 0.944928234 | -5.629433684 |
| 1420888_at   | -0.005457355 | 8.617348128 | -0.070937903 | 0.944932942 | 0.944932942 | -5.629434101 |
| 1417453_at   | 0.005609763  | 8.28848684  | 0.070901256  | 0.944961337 | 0.944961337 | -5.629436613 |
| 1427781_at   | 0.006019539  | 3.216838916 | 0.070879929  | 0.944977862 | 0.944977862 | -5.629438074 |
| 1460217_at   | -0.005873639 | 3.542330038 | -0.070866397 | 0.944988347 | 0.944988347 | -5.629439002 |
| 1448558_a_at | -0.005998172 | 8.109693672 | -0.07086048  | 0.944992931 | 0.944992931 | -5.629439407 |
| 1431604_a_at | -0.006543181 | 5.199373293 | -0.070860382 | 0.944993007 | 0.944993007 | -5.629439413 |
| 1426630_at   | 0.005002315  | 8.820375776 | 0.070850945  | 0.945000319 | 0.945000319 | -5.62944006  |
| 1443984_at   | 0.007830117  | 4.415628516 | 0.07084137   | 0.945007739 | 0.945007739 | -5.629440716 |
| 1459374_at   | -0.006755734 | 5.698318701 | -0.070806112 | 0.945035058 | 0.945035058 | -5.629443129 |
| 1437446_at   | -0.004864821 | 6.44488703  | -0.070779139 | 0.945055958 | 0.945055958 | -5.629444975 |
| 1448903_at   | 0.00545716   | 10.96560003 | 0.070724159  | 0.945098559 | 0.945098559 | -5.629448735 |
| 1435768_at   | 0.004797962  | 9.273009025 | 0.070706703  | 0.945112085 | 0.945112085 | -5.629449929 |
| 1432523_at   | -0.00594006  | 3.529756509 | -0.070702495 | 0.945115345 | 0.945115345 | -5.629450216 |
| 1418478_at   | 0.006666857  | 6.097298462 | 0.070691859  | 0.945123586 | 0.945123586 | -5.629450943 |
| 1450942_at   | 0.010461158  | 6.775209154 | 0.070685682  | 0.945128372 | 0.945128372 | -5.629451365 |
| 1418144_a_at | 0.004816035  | 9.173918069 | 0.070664066  | 0.945145121 | 0.945145121 | -5.629452842 |
| 1433833_at   | 0.005053085  | 10.92972337 | 0.070627911  | 0.945173136 | 0.945173136 | -5.629455311 |
| 1449803_x_at | 0.006203304  | 3.737328481 | 0.070626175  | 0.945174481 | 0.945174481 | -5.629455429 |
| 1416030_a_at | -0.006187418 | 10.07117408 | -0.070561606 | 0.945224513 | 0.945224513 | -5.629459835 |
| 1454589_at   | 0.005083114  | 4.858719673 | 0.070525248  | 0.945252685 | 0.945252685 | -5.629462315 |
| 1421093_at   | 0.007992478  | 5.442320089 | 0.070505593  | 0.945267915 | 0.945267915 | -5.629463654 |
| 1416055_at   | -0.005720742 | 3.223361913 | -0.070498712 | 0.945273247 | 0.945273247 | -5.629464123 |
| 1423293_at   | -0.005548218 | 10.04696334 | -0.070490613 | 0.945279522 | 0.945279522 | -5.629464675 |
| 1424012_at   | 0.004864402  | 6.55125904  | 0.070468961  | 0.9452963   | 0.9452963   | -5.62946615  |
| 1445930_at   | -0.005328266 | 3.129053076 | -0.070421204 | 0.945333305 | 0.945333305 | -5.629469402 |
| 1421275_s_at | 0.005624787  | 4.399463241 | 0.070334897  | 0.945400181 | 0.945400181 | -5.629475274 |
| 1419465_at   | 0.00833415   | 6.959776319 | 0.070333783  | 0.945401044 | 0.945401044 | -5.62947535  |
| 1450752_at   | -0.008460746 | 3.812507058 | -0.070184108 | 0.945517023 | 0.945517023 | -5.629485515 |
| 1428410_at   | 0.006296517  | 8.705458398 | 0.070174101  | 0.945524778 | 0.945524778 | -5.629486194 |
| 1453243_at   | 0.004372224  | 7.708608126 | 0.070173185  | 0.945525488 | 0.945525488 | -5.629486256 |
| 1458031_at   | -0.010148401 | 6.591183832 | -0.070159898 | 0.945535783 | 0.945535783 | -5.629487157 |
| 1424197_s_at | -0.005798612 | 6.575094796 | -0.070152479 | 0.945541532 | 0.945541532 | -5.62948766  |

|              |              |             |              |             |             |              |
|--------------|--------------|-------------|--------------|-------------|-------------|--------------|
| 1458859_at   | -0.00731606  | 3.014116924 | -0.070146329 | 0.945546298 | 0.945546298 | -5.629488077 |
| 1431469_a_at | -0.008975272 | 7.317092001 | -0.07010195  | 0.945580686 | 0.945580686 | -5.629491086 |
| 1415892_at   | 0.005243555  | 8.396564998 | 0.070079318  | 0.945598223 | 0.945598223 | -5.629492619 |
| 1454520_at   | 0.006796477  | 3.587854559 | 0.070013801  | 0.945648991 | 0.945648991 | -5.629497055 |
| 1445681_at   | -0.007292261 | 6.180862322 | -0.070013755 | 0.945649027 | 0.945649027 | -5.629497058 |
| 1433072_at   | 0.004991711  | 3.972342015 | 0.070008792  | 0.945652873 | 0.945652873 | -5.629497394 |
| 1451910_a_at | 0.006185263  | 5.078311264 | 0.069994852  | 0.945663675 | 0.945663675 | -5.629498337 |
| 1445826_at   | 0.010357512  | 5.677400145 | 0.069974872  | 0.945679158 | 0.945679158 | -5.629499689 |
| 1423459_at   | 0.00477094   | 10.27242644 | 0.069966585  | 0.945685579 | 0.945685579 | -5.62950025  |
| 1437928_at   | -0.005940537 | 6.887057097 | -0.069962162 | 0.945689006 | 0.945689006 | -5.629500549 |
| 1454392_at   | 0.005569091  | 3.517310052 | 0.069959871  | 0.945690781 | 0.945690781 | -5.629500704 |
| 1426594_at   | 0.008026101  | 5.623419363 | 0.069951718  | 0.945697099 | 0.945697099 | -5.629501255 |
| 1419552_at   | 0.004711292  | 7.318310629 | 0.069925919  | 0.94571709  | 0.94571709  | -5.629502999 |
| 1444709_at   | 0.007425725  | 5.380296994 | 0.069905882  | 0.945732617 | 0.945732617 | -5.629504353 |
| 1423784_at   | 0.005612005  | 9.85775086  | 0.069900207  | 0.945737014 | 0.945737014 | -5.629504737 |
| 1425493_at   | -0.00574396  | 8.954252118 | -0.069884317 | 0.945749328 | 0.945749328 | -5.62950581  |
| 1424475_at   | 0.006059976  | 7.544149591 | 0.069869884  | 0.945760511 | 0.945760511 | -5.629506785 |
| 1444775_at   | -0.006439216 | 5.958495648 | -0.069822152 | 0.945797499 | 0.945797499 | -5.629510008 |
| 1455972_x_at | -0.004938464 | 11.55849713 | -0.069705683 | 0.945887751 | 0.945887751 | -5.629517862 |
| 1422688_a_at | 0.006776004  | 8.515521923 | 0.069696423  | 0.945894927 | 0.945894927 | -5.629518486 |
| 1436557_at   | 0.006080181  | 5.644002351 | 0.069680296  | 0.945907424 | 0.945907424 | -5.629519573 |
| 1444904_at   | -0.008782901 | 5.306228192 | -0.069674119 | 0.945912211 | 0.945912211 | -5.629519989 |
| 1418031_at   | 0.005644961  | 8.675194275 | 0.069671202  | 0.945914471 | 0.945914471 | -5.629520185 |
| 1434433_x_at | 0.00673438   | 6.805474616 | 0.069628024  | 0.94594793  | 0.94594793  | -5.629523092 |
| 1422973_a_at | 0.005111088  | 4.568644072 | 0.069613973  | 0.945958819 | 0.945958819 | -5.629524038 |
| 1421492_at   | -0.00845471  | 5.623279516 | -0.069590128 | 0.945977296 | 0.945977296 | -5.629525642 |
| 1452452_at   | -0.006165722 | 7.36261822  | -0.069562975 | 0.945998337 | 0.945998337 | -5.629527469 |
| 1416170_at   | -0.005154556 | 9.198830693 | -0.069562055 | 0.94599905  | 0.94599905  | -5.62952753  |
| 1439736_at   | 0.004778175  | 3.130871226 | 0.069529667  | 0.946024148 | 0.946024148 | -5.629529708 |
| 1427594_at   | 0.00524518   | 4.096479745 | 0.069521416  | 0.946030542 | 0.946030542 | -5.629530262 |
| 1441245_a_at | 0.006097353  | 5.606630235 | 0.069485616  | 0.946058284 | 0.946058284 | -5.629532668 |
| 1442922_at   | 0.005152934  | 4.000138479 | 0.069481387  | 0.946061561 | 0.946061561 | -5.629532952 |
| 1430571_s_at | 0.006703999  | 6.688226435 | 0.069440917  | 0.946092922 | 0.946092922 | -5.629535669 |
| 1416873_a_at | 0.00440823   | 9.624204536 | 0.069419751  | 0.946109324 | 0.946109324 | -5.62953709  |
| 1416366_at   | -0.00647352  | 10.62478477 | -0.069404714 | 0.946120977 | 0.946120977 | -5.629538098 |
| 1432967_at   | -0.006325182 | 3.822572378 | -0.06940321  | 0.946122142 | 0.946122142 | -5.629538199 |
| 1421746_a_at | -0.007273148 | 6.438294135 | -0.069397001 | 0.946126954 | 0.946126954 | -5.629538616 |
| 1451897_a_at | -0.005088376 | 8.488883072 | -0.06938882  | 0.946133294 | 0.946133294 | -5.629539165 |
| 1421259_at   | -0.005596156 | 7.078629132 | -0.06938567  | 0.946135734 | 0.946135734 | -5.629539376 |
| 1420922_at   | 0.005986293  | 9.138721341 | 0.069374336  | 0.946144517 | 0.946144517 | -5.629540136 |
| 1429738_at   | -0.006183672 | 5.545683285 | -0.069317663 | 0.946188435 | 0.946188435 | -5.629543935 |
| 1450257_at   | -0.005722079 | 4.701176732 | -0.069313622 | 0.946191567 | 0.946191567 | -5.629544206 |
| 1444489_at   | -0.004551614 | 6.570255033 | -0.069290231 | 0.946209693 | 0.946209693 | -5.629545773 |
| 1425511_at   | 0.004840181  | 7.90701795  | 0.069275841  | 0.946220844 | 0.946220844 | -5.629546737 |
| 1448407_at   | -0.005329931 | 6.009262457 | -0.069267261 | 0.946227493 | 0.946227493 | -5.629547311 |
| 1422318_at   | -0.006507479 | 3.769305194 | -0.069250609 | 0.946240397 | 0.946240397 | -5.629548426 |
| 1444575_at   | -0.009764678 | 5.904048763 | -0.069243183 | 0.946246152 | 0.946246152 | -5.629548923 |
| 1438845_at   | 0.005196922  | 3.284095585 | 0.069219739  | 0.94626432  | 0.94626432  | -5.629550492 |
| 1451707_s_at | 0.007587205  | 4.852134421 | 0.0691782    | 0.94629651  | 0.94629651  | -5.629553271 |
| 1460733_at   | -0.005178012 | 8.898367302 | -0.06912931  | 0.946334397 | 0.946334397 | -5.629556539 |
| 1431723_at   | 0.005749455  | 3.794227264 | 0.069126853  | 0.9463363   | 0.9463363   | -5.629556703 |
| 1422698_s_at | -0.004938511 | 9.462617645 | -0.069118464 | 0.946342801 | 0.946342801 | -5.629557264 |
| 1421758_at   | -0.007460347 | 4.381679672 | -0.069038933 | 0.946404433 | 0.946404433 | -5.629562574 |

|              |              |             |              |             |             |              |
|--------------|--------------|-------------|--------------|-------------|-------------|--------------|
| 1425632_a_at | 0.006865836  | 6.491048045 | 0.069036993  | 0.946405937 | 0.946405937 | -5.629562704 |
| 1443642_at   | 0.008365574  | 4.817471866 | 0.069013397  | 0.946424223 | 0.946424223 | -5.629564278 |
| 1455095_at   | -0.015869648 | 5.616187132 | -0.068986076 | 0.946445395 | 0.946445395 | -5.629566101 |
| 1455240_x_at | 0.007641724  | 3.641318462 | 0.06896334   | 0.946463014 | 0.946463014 | -5.629567617 |
| 1418786_at   | 0.005931652  | 6.197519916 | 0.0689461    | 0.946476374 | 0.946476374 | -5.629568766 |
| 1441033_at   | -0.005367451 | 7.943454592 | -0.068941934 | 0.946479603 | 0.946479603 | -5.629569043 |
| 1454475_at   | 0.004975084  | 3.940840316 | 0.068876781  | 0.946530093 | 0.946530093 | -5.629573383 |
| 1416540_at   | -0.006092067 | 8.639553358 | -0.06886513  | 0.946539123 | 0.946539123 | -5.629574159 |
| 1425720_at   | -0.005783189 | 3.779129309 | -0.068858626 | 0.946544163 | 0.946544163 | -5.629574592 |
| 1428521_at   | -0.006552377 | 7.396413512 | -0.068832237 | 0.946564613 | 0.946564613 | -5.629576348 |
| 1449358_at   | 0.005074241  | 4.879628228 | 0.068806918  | 0.946584234 | 0.946584234 | -5.629578033 |
| 1426848_at   | -0.006199617 | 8.945461418 | -0.068767085 | 0.946615104 | 0.946615104 | -5.629580681 |
| 1429588_at   | 0.004373485  | 8.733724835 | 0.068750096  | 0.946628269 | 0.946628269 | -5.62958181  |
| 1446140_at   | -0.008194281 | 6.843197972 | -0.06870019  | 0.946666945 | 0.946666945 | -5.629585126 |
| 1434801_x_at | -0.00456481  | 11.53654013 | -0.06867308  | 0.946687953 | 0.946687953 | -5.629586926 |
| 1435107_at   | 0.006221364  | 6.849225886 | 0.068669125  | 0.946691019 | 0.946691019 | -5.629587189 |
| 1417260_at   | 0.005482622  | 10.48256929 | 0.068577282  | 0.946762194 | 0.946762194 | -5.629593281 |
| 1420810_at   | -0.007429132 | 8.464437645 | -0.06856368  | 0.946772736 | 0.946772736 | -5.629594183 |
| 1439898_at   | -0.005314028 | 4.593454227 | -0.06856137  | 0.946774526 | 0.946774526 | -5.629594336 |
| 1417632_at   | -0.00567883  | 7.151571699 | -0.068555557 | 0.946779031 | 0.946779031 | -5.629594721 |
| 1430459_at   | -0.006111244 | 4.255400521 | -0.068547497 | 0.946785277 | 0.946785277 | -5.629595255 |
| 1454327_at   | -0.006138439 | 4.208411941 | -0.068517995 | 0.946808141 | 0.946808141 | -5.62959721  |
| 1452336_at   | 0.00864737   | 6.710049924 | 0.068509652  | 0.946814606 | 0.946814606 | -5.629597762 |
| 1415970_at   | -0.004435276 | 12.02403301 | -0.068463492 | 0.946850379 | 0.946850379 | -5.629600818 |
| 1439059_at   | 0.006102851  | 6.578951768 | 0.068463385  | 0.946850462 | 0.946850462 | -5.629600825 |
| 1452709_at   | -0.007583242 | 9.588659524 | -0.068348277 | 0.946939669 | 0.946939669 | -5.629608437 |
| 1432016_a_at | 0.004199934  | 9.948756574 | 0.068344996  | 0.946942211 | 0.946942211 | -5.629608654 |
| 1417232_at   | -0.00603943  | 4.71820317  | -0.068331326 | 0.946952805 | 0.946952805 | -5.629609557 |
| 1423471_at   | 0.008406333  | 5.685436563 | 0.068308734  | 0.946970314 | 0.946970314 | -5.629611049 |
| 1450905_at   | -0.005766896 | 6.108971687 | -0.068307196 | 0.946971506 | 0.946971506 | -5.62961115  |
| 1459161_at   | -0.006654898 | 4.460118316 | -0.06828417  | 0.946989351 | 0.946989351 | -5.629612671 |
| 1460449_at   | -0.004727178 | 3.264227265 | -0.068281374 | 0.946991518 | 0.946991518 | -5.629612855 |
| 1436407_at   | -0.00940078  | 4.44319994  | -0.068175256 | 0.947073759 | 0.947073759 | -5.629619854 |
| 1435976_at   | 0.005145527  | 5.080008923 | 0.068173085  | 0.947075441 | 0.947075441 | -5.629619997 |
| 1457348_at   | 0.00724826   | 6.798126164 | 0.068115145  | 0.947120345 | 0.947120345 | -5.629623814 |
| 1447223_at   | -0.022104143 | 6.898610328 | -0.068025635 | 0.947189715 | 0.947189715 | -5.629629704 |
| 1435383_x_at | 0.005990823  | 11.49151946 | 0.06800136   | 0.947208528 | 0.947208528 | -5.6296313   |
| 1445319_at   | -0.005280453 | 4.032250111 | -0.067958479 | 0.947241762 | 0.947241762 | -5.629634118 |
| 1435811_a_at | 0.004337199  | 10.36295719 | 0.067950677  | 0.947247808 | 0.947247808 | -5.62963463  |
| 1433862_at   | 0.006539712  | 8.069288587 | 0.067937569  | 0.947257967 | 0.947257967 | -5.629635491 |
| 1419630_a_at | 0.004614228  | 7.393021496 | 0.067937521  | 0.947258004 | 0.947258004 | -5.629635494 |
| 1418122_at   | -0.004509656 | 4.112500496 | -0.067869315 | 0.947310864 | 0.947310864 | -5.629639972 |
| 1431492_at   | -0.007084954 | 3.415752118 | -0.067815824 | 0.947352321 | 0.947352321 | -5.62964348  |
| 1415712_at   | -0.007997901 | 8.719284327 | -0.067678977 | 0.94745838  | 0.94745838  | -5.629652442 |
| 1416802_a_at | 0.006395464  | 8.857509912 | 0.06766391   | 0.947470058 | 0.947470058 | -5.629653427 |
| 1426099_at   | 0.004075294  | 4.014511697 | 0.067640886  | 0.947487902 | 0.947487902 | -5.629654933 |
| 1428733_at   | -0.004501996 | 4.768333875 | -0.067617879 | 0.947505733 | 0.947505733 | -5.629656437 |
| 1438149_at   | -0.006419143 | 4.768360837 | -0.067614587 | 0.947508284 | 0.947508284 | -5.629656652 |
| 1437553_at   | -0.004899999 | 6.964239529 | -0.067595319 | 0.947523217 | 0.947523217 | -5.629657912 |
| 1453094_at   | 0.008640147  | 6.740425236 | 0.06758828   | 0.947528674 | 0.947528674 | -5.629658372 |
| 1441263_a_at | 0.008258275  | 7.845815141 | 0.067581312  | 0.947534073 | 0.947534073 | -5.629658827 |
| 1439270_x_at | -0.005898161 | 11.85918781 | -0.067574624 | 0.947539257 | 0.947539257 | -5.629659264 |
| 1424722_at   | 0.006268928  | 4.864348537 | 0.067569744  | 0.947543039 | 0.947543039 | -5.629659583 |

|              |              |             |              |             |             |              |
|--------------|--------------|-------------|--------------|-------------|-------------|--------------|
| 1426461_at   | 0.005174105  | 8.409788452 | 0.067539311  | 0.947566626 | 0.947566626 | -5.62966157  |
| 1455900_x_at | 0.014364216  | 7.959236296 | 0.067475808  | 0.947615843 | 0.947615843 | -5.629665714 |
| 1416143_at   | 0.004333372  | 11.77665674 | 0.067334273  | 0.947725538 | 0.947725538 | -5.629674937 |
| 1440991_at   | -0.007267291 | 5.923285033 | -0.067322968 | 0.9477343   | 0.9477343   | -5.629675672 |
| 1444905_at   | 0.005627671  | 3.808604519 | 0.067242267  | 0.947796847 | 0.947796847 | -5.629680921 |
| 1450493_at   | -0.005039082 | 4.760391917 | -0.067224248 | 0.947810813 | 0.947810813 | -5.629682092 |
| 1423121_at   | -0.010746302 | 6.933281165 | -0.06720617  | 0.947824824 | 0.947824824 | -5.629683267 |
| 1439964_at   | -0.004851192 | 6.900505496 | -0.067134189 | 0.947880614 | 0.947880614 | -5.629687941 |
| 1445710_x_at | -0.010505413 | 7.757723314 | -0.067116645 | 0.947894211 | 0.947894211 | -5.629689079 |
| 1460246_at   | -0.005613903 | 8.496792231 | -0.067074277 | 0.947927049 | 0.947927049 | -5.629691827 |
| 1423260_at   | 0.005342061  | 8.534342091 | 0.067050547  | 0.947945441 | 0.947945441 | -5.629693366 |
| 1452207_at   | 0.006678841  | 9.441915074 | 0.066992762  | 0.947990229 | 0.947990229 | -5.62969711  |
| 1443860_at   | 0.007529466  | 7.485639046 | 0.066985216  | 0.947996077 | 0.947996077 | -5.629697598 |
| 1424864_at   | 0.004183844  | 4.130966526 | 0.066948456  | 0.948024568 | 0.948024568 | -5.629699978 |
| 1451010_at   | 0.00460981   | 8.71144968  | 0.066945031  | 0.948027223 | 0.948027223 | -5.6297002   |
| 1422441_x_at | -0.004567431 | 11.49087693 | -0.066925079 | 0.948042687 | 0.948042687 | -5.629701491 |
| 1417679_at   | 0.006174909  | 3.363531004 | 0.066906959  | 0.948056732 | 0.948056732 | -5.629702663 |
| 1416060_at   | -0.008925711 | 9.099547201 | -0.066885208 | 0.94807359  | 0.94807359  | -5.62970407  |
| 1445190_at   | -0.007408846 | 4.049805436 | -0.066851004 | 0.948100101 | 0.948100101 | -5.629706281 |
| 1439176_at   | -0.006294618 | 5.610855535 | -0.066776714 | 0.948157681 | 0.948157681 | -5.629711079 |
| 1429103_at   | 0.004189355  | 9.670619205 | 0.066771596  | 0.948161648 | 0.948161648 | -5.629711409 |
| 1432726_at   | 0.00539932   | 3.490213171 | 0.066696487  | 0.948219864 | 0.948219864 | -5.629716255 |
| 1434359_at   | -0.006192805 | 4.551062831 | -0.066690731 | 0.948224325 | 0.948224325 | -5.629716626 |
| 1435328_at   | 0.00745299   | 8.917386301 | 0.066620505  | 0.948278756 | 0.948278756 | -5.629721151 |
| 1434754_at   | -0.005308676 | 6.0226151   | -0.06661211  | 0.948285263 | 0.948285263 | -5.629721692 |
| 1426956_a_at | -0.006613225 | 10.26737991 | -0.066585322 | 0.948306026 | 0.948306026 | -5.629723416 |
| 1440411_at   | -0.008234428 | 3.604900651 | -0.066527655 | 0.948350723 | 0.948350723 | -5.629727126 |
| 1457892_at   | 0.005448781  | 3.216231014 | 0.066499515  | 0.948372534 | 0.948372534 | -5.629728936 |
| 1427133_s_at | -0.006469333 | 4.100766008 | -0.06647322  | 0.948392915 | 0.948392915 | -5.629730626 |
| 1446492_at   | -0.009457686 | 4.49513156  | -0.066459131 | 0.948403835 | 0.948403835 | -5.629731531 |
| 1436152_a_at | 0.007535615  | 9.686287625 | 0.066439445  | 0.948419094 | 0.948419094 | -5.629732796 |
| 1448574_at   | 0.006105046  | 7.798653702 | 0.066431434  | 0.948425303 | 0.948425303 | -5.629733331 |
| 1458156_at   | -0.007104499 | 7.880851233 | -0.066382264 | 0.948463415 | 0.948463415 | -5.629736467 |
| 1458538_at   | -0.005473486 | 6.392198067 | -0.066365553 | 0.948476368 | 0.948476368 | -5.629737539 |
| 1439628_x_at | 0.006735929  | 7.594797183 | 0.066354269  | 0.948485114 | 0.948485114 | -5.629738263 |
| 1439845_at   | 0.009914303  | 6.848632126 | 0.066328693  | 0.948504938 | 0.948504938 | -5.629739903 |
| 1431413_at   | -0.005317032 | 4.297477836 | -0.066276377 | 0.948545488 | 0.948545488 | -5.629743256 |
| 1438583_at   | -0.005094416 | 5.760079093 | -0.066209588 | 0.948597257 | 0.948597257 | -5.629747533 |
| 1422527_at   | 0.006908276  | 6.622251082 | 0.066209058  | 0.948597667 | 0.948597667 | -5.629747567 |
| 1433171_at   | 0.007735388  | 3.298287357 | 0.066198736  | 0.948605668 | 0.948605668 | -5.629748228 |
| 1437710_x_at | 0.006246822  | 5.434273466 | 0.066192821  | 0.948610254 | 0.948610254 | -5.629748606 |
| 1418055_at   | -0.004944754 | 3.273864866 | -0.066166977 | 0.948630285 | 0.948630285 | -5.62975026  |
| 1449367_at   | 0.006931244  | 4.498105096 | 0.066129795  | 0.948659106 | 0.948659106 | -5.629752638 |
| 1450624_at   | -0.006189622 | 3.669507683 | -0.066081377 | 0.948696635 | 0.948696635 | -5.629755732 |
| 1452395_at   | 0.003926358  | 8.954592716 | 0.06599981   | 0.94875986  | 0.94875986  | -5.629760939 |
| 1426104_at   | 0.005090022  | 4.921358541 | 0.065946908  | 0.948800865 | 0.948800865 | -5.629764313 |
| 1419805_s_at | 0.006184525  | 6.922388475 | 0.065902412  | 0.948835355 | 0.948835355 | -5.629767149 |
| 1441610_at   | -0.007482575 | 6.142214784 | -0.065861498 | 0.948867068 | 0.948867068 | -5.629769755 |
| 1459875_x_at | 0.006121083  | 6.598709484 | 0.065849385  | 0.948876458 | 0.948876458 | -5.629770526 |
| 1448172_at   | -0.004941496 | 11.59700505 | -0.065818271 | 0.948900575 | 0.948900575 | -5.629772506 |
| 1427191_at   | -0.005294213 | 8.91961062  | -0.065811011 | 0.948906202 | 0.948906202 | -5.629772968 |
| 1432807_at   | -0.006514312 | 4.920351268 | -0.065750318 | 0.948953248 | 0.948953248 | -5.629776827 |
| 1456362_at   | 0.004310362  | 4.105138634 | 0.065733017  | 0.948966659 | 0.948966659 | -5.629777927 |

|              |              |             |              |             |             |              |
|--------------|--------------|-------------|--------------|-------------|-------------|--------------|
| 1415923_at   | -0.006423896 | 11.45165889 | -0.065717674 | 0.948978551 | 0.948978551 | -5.629778902 |
| 1434257_s_at | -0.005041709 | 9.759526608 | -0.065717183 | 0.948978932 | 0.948978932 | -5.629778933 |
| 1455174_at   | 0.005322641  | 8.653390631 | 0.065714133  | 0.948981296 | 0.948981296 | -5.629779127 |
| 1426293_at   | 0.005557876  | 7.307860098 | 0.065690685  | 0.948999471 | 0.948999471 | -5.629780616 |
| 1451056_at   | -0.004291916 | 9.765218412 | -0.065683415 | 0.949005106 | 0.949005106 | -5.629781078 |
| 1450097_s_at | 0.009246108  | 8.101243202 | 0.065566286  | 0.949095898 | 0.949095898 | -5.629788508 |
| 1448014_s_at | -0.004063365 | 7.617198519 | -0.065496757 | 0.949149794 | 0.949149794 | -5.629792913 |
| 1433290_at   | 0.006964951  | 3.4191661   | 0.065488778  | 0.949155979 | 0.949155979 | -5.629793418 |
| 1453353_at   | 0.00615315   | 3.723904059 | 0.065479413  | 0.949163238 | 0.949163238 | -5.629794011 |
| 1453595_at   | 0.004714947  | 3.838900966 | 0.06544738   | 0.949188068 | 0.949188068 | -5.629796038 |
| 1434553_at   | -0.008391116 | 3.969083495 | -0.065385721 | 0.949235864 | 0.949235864 | -5.629799938 |
| 1450411_at   | -0.005921817 | 3.750344083 | -0.065336389 | 0.949274104 | 0.949274104 | -5.629803055 |
| 1417239_at   | 0.00599718   | 10.17089504 | 0.065321161  | 0.949285908 | 0.949285908 | -5.629804017 |
| 1447119_at   | -0.008287664 | 4.694469477 | -0.065318756 | 0.949287772 | 0.949287772 | -5.629804168 |
| 1422942_at   | -0.006888874 | 3.752563359 | -0.065256968 | 0.949335668 | 0.949335668 | -5.629808068 |
| 1428640_at   | 0.005396198  | 4.220477811 | 0.06524199   | 0.949347279 | 0.949347279 | -5.629809013 |
| 1429102_at   | -0.004016842 | 3.956147508 | -0.065237537 | 0.94935073  | 0.94935073  | -5.629809294 |
| 1459780_at   | -0.005760306 | 3.326934315 | -0.065214329 | 0.94936872  | 0.94936872  | -5.629810757 |
| 1425416_s_at | -0.00572679  | 8.240770442 | -0.065209675 | 0.949372328 | 0.949372328 | -5.629811051 |
| 1417855_at   | 0.005272295  | 6.379543072 | 0.065207904  | 0.949373701 | 0.949373701 | -5.629811162 |
| 1433928_a_at | 0.005791564  | 11.34974576 | 0.06517796   | 0.949396913 | 0.949396913 | -5.629813049 |
| 1416871_at   | 0.005349697  | 6.436554275 | 0.065169645  | 0.949403358 | 0.949403358 | -5.629813573 |
| 1433872_at   | -0.006528506 | 7.680944169 | -0.065150254 | 0.949418389 | 0.949418389 | -5.629814795 |
| 1441616_at   | -0.006012662 | 3.897946387 | -0.065115821 | 0.94944508  | 0.94944508  | -5.629816963 |
| 1455221_at   | -0.004980414 | 5.247214767 | -0.065107428 | 0.949451587 | 0.949451587 | -5.629817491 |
| 1459006_a_at | -0.004043646 | 3.588702215 | -0.064990946 | 0.949541881 | 0.949541881 | -5.629824816 |
| 1425887_at   | 0.005847809  | 4.422277829 | 0.064962218  | 0.94956415  | 0.94956415  | -5.629826621 |
| 1459771_x_at | 0.005913142  | 4.962869353 | 0.064936493  | 0.949584092 | 0.949584092 | -5.629828236 |
| 1439547_at   | 0.006122212  | 3.616001266 | 0.064898627  | 0.949613444 | 0.949613444 | -5.629830612 |
| 1452388_at   | -0.005682854 | 5.402064054 | -0.064840853 | 0.94965823  | 0.94965823  | -5.629834235 |
| 1457727_at   | -0.00451229  | 5.581235073 | -0.064818155 | 0.949675825 | 0.949675825 | -5.629835658 |
| 1441963_at   | -0.006944714 | 6.775795523 | -0.064790887 | 0.949696963 | 0.949696963 | -5.629837366 |
| 1416252_at   | -0.003961352 | 10.26514326 | -0.064772572 | 0.949711161 | 0.949711161 | -5.629838513 |
| 1443463_at   | 0.005792175  | 3.753240842 | 0.064757069  | 0.949723179 | 0.949723179 | -5.629839484 |
| 1459191_at   | 0.005583068  | 4.138441261 | 0.064710012  | 0.949759657 | 0.949759657 | -5.629842429 |
| 1448435_at   | -0.006777921 | 8.365281196 | -0.064697585 | 0.94976929  | 0.94976929  | -5.629843206 |
| 1418683_at   | 0.005015175  | 5.630699253 | 0.064669666  | 0.949790933 | 0.949790933 | -5.629844952 |
| 1455614_at   | 0.005160984  | 6.445069781 | 0.064660405  | 0.949798112 | 0.949798112 | -5.629845531 |
| 1449273_at   | -0.00626997  | 6.013795051 | -0.064626033 | 0.949824757 | 0.949824757 | -5.629847679 |
| 1424771_at   | -0.006836561 | 9.811691724 | -0.06462429  | 0.949826108 | 0.949826108 | -5.629847788 |
| 1446259_at   | 0.00909712   | 5.631274408 | 0.064614898  | 0.949833389 | 0.949833389 | -5.629848374 |
| 1434544_at   | -0.005351627 | 9.0058187   | -0.064607603 | 0.949839044 | 0.949839044 | -5.629848883 |
| 1425516_at   | -0.003940539 | 9.662792818 | -0.064590846 | 0.949852034 | 0.949852034 | -5.629849877 |
| 1429541_at   | -0.004592456 | 8.16439839  | -0.064586058 | 0.949855746 | 0.949855746 | -5.629850176 |
| 1453385_at   | -0.005063407 | 3.885313314 | -0.064557067 | 0.94987822  | 0.94987822  | -5.629851985 |
| 1442630_at   | -0.005981705 | 4.065047559 | -0.06451921  | 0.949907567 | 0.949907567 | -5.629854347 |
| 1447919_x_at | 0.00625304   | 10.4045673  | 0.064508008  | 0.94991625  | 0.94991625  | -5.629855046 |
| 1419243_at   | -0.004775399 | 8.973278234 | -0.064439542 | 0.949969326 | 0.949969326 | -5.629859313 |
| 1429937_at   | -0.005855987 | 5.481606753 | -0.064406187 | 0.949995183 | 0.949995183 | -5.629861391 |
| 1449450_at   | 0.004146223  | 7.430680412 | 0.064373733  | 0.950020341 | 0.950020341 | -5.629863411 |
| 1448800_at   | -0.004756317 | 6.012595973 | -0.064371684 | 0.95002193  | 0.95002193  | -5.629863538 |
| 1446608_at   | 0.009631183  | 4.860825203 | 0.064307885  | 0.950071388 | 0.950071388 | -5.629867507 |
| 1436731_at   | 0.00905071   | 6.59215348  | 0.064303672  | 0.950074654 | 0.950074654 | -5.629867769 |

|              |              |             |              |             |             |              |
|--------------|--------------|-------------|--------------|-------------|-------------|--------------|
| 1447707_s_at | 0.006731952  | 9.06746716  | 0.064301867  | 0.950076053 | 0.950076053 | -5.629867881 |
| 1447169_at   | -0.004529744 | 3.109761511 | -0.064301841 | 0.950076073 | 0.950076073 | -5.629867882 |
| 1423411_at   | -0.007194286 | 3.863575039 | -0.064285785 | 0.95008852  | 0.95008852  | -5.62986888  |
| 1440398_at   | 0.005444703  | 5.165074083 | 0.064278859  | 0.95009389  | 0.95009389  | -5.629869311 |
| 1436355_at   | 0.004262938  | 4.017864433 | 0.06427025   | 0.950100563 | 0.950100563 | -5.629869846 |
| 1422279_at   | -0.009267058 | 6.733291181 | -0.0642547   | 0.950112618 | 0.950112618 | -5.629870812 |
| 1431216_s_at | 0.006458704  | 3.833632559 | 0.064218452  | 0.950140718 | 0.950140718 | -5.629873063 |
| 1450543_at   | -0.004430461 | 5.411193815 | -0.064105965 | 0.950227921 | 0.950227921 | -5.62988004  |
| 1426197_at   | 0.003943636  | 3.282430943 | 0.064095771  | 0.950235823 | 0.950235823 | -5.629880672 |
| 1428420_a_at | -0.006579765 | 6.40831474  | -0.064086308 | 0.950243159 | 0.950243159 | -5.629881258 |
| 1448536_at   | 0.004931057  | 10.63018971 | 0.06406786   | 0.950257461 | 0.950257461 | -5.629882401 |
| 1458000_at   | 0.011941711  | 4.30370825  | 0.064045208  | 0.950275022 | 0.950275022 | -5.629883804 |
| 1421923_at   | 0.006846002  | 8.262626607 | 0.064033926  | 0.950283767 | 0.950283767 | -5.629884502 |
| 1422710_a_at | 0.009052222  | 7.603869509 | 0.064013169  | 0.950299859 | 0.950299859 | -5.629885787 |
| 1443701_at   | -0.006432118 | 5.946852239 | -0.063975433 | 0.950329114 | 0.950329114 | -5.629888122 |
| 1419488_at   | 0.005117888  | 5.610026905 | 0.063924356  | 0.95036871  | 0.95036871  | -5.629891279 |
| 1428409_at   | 0.004043416  | 10.57529361 | 0.063889501  | 0.950395731 | 0.950395731 | -5.629893433 |
| 1456050_at   | 0.00432489   | 6.77566042  | 0.063825885  | 0.950445048 | 0.950445048 | -5.62989736  |
| 1425686_at   | -0.004881061 | 7.649473979 | -0.063795468 | 0.950468629 | 0.950468629 | -5.629899236 |
| 1428366_at   | -0.004653017 | 8.057863353 | -0.063724008 | 0.950524029 | 0.950524029 | -5.629903641 |
| 1447476_at   | 0.0057085    | 5.075558197 | 0.063704529  | 0.95053913  | 0.95053913  | -5.629904841 |
| 1424891_a_at | -0.004583765 | 9.473752402 | -0.063645271 | 0.950585069 | 0.950585069 | -5.629908489 |
| 1419611_at   | -0.007618279 | 6.145567944 | -0.063640236 | 0.950588973 | 0.950588973 | -5.629908799 |
| 1434117_at   | 0.006469849  | 8.556449205 | 0.063599951  | 0.950620204 | 0.950620204 | -5.629911276 |
| 1443863_at   | -0.00460278  | 7.307645621 | -0.063596952 | 0.950622528 | 0.950622528 | -5.629911461 |
| 1431451_at   | 0.007441083  | 4.833914293 | 0.063588763  | 0.950628878 | 0.950628878 | -5.629911964 |
| 1444710_at   | -0.004240276 | 3.796473779 | -0.06358216  | 0.950633996 | 0.950633996 | -5.62991237  |
| 1449887_at   | -0.005110218 | 3.121338781 | -0.063544425 | 0.95066325  | 0.95066325  | -5.629914689 |
| 1455295_at   | 0.006752062  | 7.306448388 | 0.063519093  | 0.950682889 | 0.950682889 | -5.629916245 |
| 1450521_a_at | 0.00487901   | 3.583850318 | 0.06349505   | 0.950701529 | 0.950701529 | -5.629917721 |
| 1442805_at   | 0.004119278  | 5.132461163 | 0.063436471  | 0.950746944 | 0.950746944 | -5.629921315 |
| 1448519_at   | 0.00792944   | 9.365383044 | 0.063421196  | 0.950758786 | 0.950758786 | -5.629922252 |
| 1417074_at   | 0.006648111  | 3.414223157 | 0.063410353  | 0.950767192 | 0.950767192 | -5.629922916 |
| 1430706_at   | 0.005135973  | 3.373298767 | 0.063397309  | 0.950777304 | 0.950777304 | -5.629923716 |
| 1454775_at   | -0.005333928 | 7.521703857 | -0.063352046 | 0.950812395 | 0.950812395 | -5.629926489 |
| 1423067_at   | -0.004569098 | 9.254445363 | -0.063318476 | 0.950838421 | 0.950838421 | -5.629928545 |
| 1449309_at   | 0.005095774  | 4.439433038 | 0.063314927  | 0.950841173 | 0.950841173 | -5.629928762 |
| 1421128_at   | 0.004225769  | 3.592084111 | 0.063259941  | 0.950883801 | 0.950883801 | -5.629932126 |
| 1436588_at   | -0.005394246 | 7.638982811 | -0.063185027 | 0.950941881 | 0.950941881 | -5.629936705 |
| 1460562_at   | 0.004337785  | 7.268197709 | 0.063146615  | 0.95097166  | 0.95097166  | -5.62993905  |
| 1452288_at   | -0.004811383 | 7.872609725 | -0.063145841 | 0.950972261 | 0.950972261 | -5.629939098 |
| 1435899_at   | -0.007931968 | 6.316214557 | -0.063072722 | 0.951028948 | 0.951028948 | -5.629943559 |
| 1453589_a_at | 0.007983323  | 8.900045493 | 0.062990027  | 0.951093061 | 0.951093061 | -5.629948598 |
| 1456511_x_at | 0.00452266   | 3.276397016 | 0.062968823  | 0.9511095   | 0.9511095   | -5.629949889 |
| 1423665_a_at | 0.003709566  | 13.99189958 | 0.062916778  | 0.95114985  | 0.95114985  | -5.629953056 |
| 1421607_at   | -0.00464246  | 4.103173076 | -0.06288019  | 0.951178216 | 0.951178216 | -5.629955281 |
| 1444363_at   | 0.005759439  | 4.163843088 | 0.062859146  | 0.951194532 | 0.951194532 | -5.62995656  |
| 1432878_at   | 0.005201565  | 3.852916023 | 0.062757882  | 0.951273041 | 0.951273041 | -5.629962709 |
| 1458127_at   | -0.005149638 | 6.126982193 | -0.062749123 | 0.951279833 | 0.951279833 | -5.62996324  |
| 1418678_at   | 0.005953615  | 8.362713448 | 0.062733179  | 0.951292194 | 0.951292194 | -5.629964207 |
| 1420332_x_at | -0.005641747 | 4.029952159 | -0.06272103  | 0.951301613 | 0.951301613 | -5.629964944 |
| 1426637_a_at | -0.006283813 | 3.516691483 | -0.062693956 | 0.951322603 | 0.951322603 | -5.629966585 |
| 1455679_at   | 0.004860228  | 3.414281434 | 0.062659507  | 0.951349312 | 0.951349312 | -5.629968673 |

|              |              |             |              |             |             |              |
|--------------|--------------|-------------|--------------|-------------|-------------|--------------|
| 1452736_at   | -0.003929646 | 8.374503354 | -0.06254814  | 0.951435656 | 0.951435656 | -5.629975413 |
| 1431563_at   | -0.005067796 | 3.630167381 | -0.062511376 | 0.951464159 | 0.951464159 | -5.629977635 |
| 1440885_at   | -0.008008736 | 7.36720274  | -0.062498516 | 0.95147413  | 0.95147413  | -5.629978412 |
| 1424181_at   | -0.004470386 | 7.500275581 | -0.062484698 | 0.951484843 | 0.951484843 | -5.629979247 |
| 1436066_at   | -0.007751214 | 4.254527551 | -0.062439215 | 0.951520107 | 0.951520107 | -5.629981994 |
| 1417172_at   | 0.005824911  | 4.793210047 | 0.062435689  | 0.951522841 | 0.951522841 | -5.629982207 |
| 1459692_at   | 0.004376051  | 3.373149636 | 0.062418212  | 0.951536391 | 0.951536391 | -5.629983261 |
| 1417203_at   | 0.004004049  | 7.177309389 | 0.062355799  | 0.951584781 | 0.951584781 | -5.629987026 |
| 1443365_at   | -0.004544764 | 3.628197067 | -0.062351833 | 0.951587856 | 0.951587856 | -5.629987265 |
| 1439739_at   | -0.005947037 | 4.467914724 | -0.062334453 | 0.951601331 | 0.951601331 | -5.629988312 |
| 1452632_at   | -0.012609596 | 5.971200701 | -0.062332265 | 0.951603027 | 0.951603027 | -5.629988444 |
| 1433246_at   | 0.006410482  | 4.994245453 | 0.062284474  | 0.951640081 | 0.951640081 | -5.629991323 |
| 1450201_at   | -0.004426316 | 3.352558543 | -0.062277869 | 0.951645202 | 0.951645202 | -5.629991721 |
| 1437012_x_at | 0.004659861  | 4.874420257 | 0.062275546  | 0.951647004 | 0.951647004 | -5.629991861 |
| 1418267_at   | 0.004809689  | 4.942052063 | 0.06227426   | 0.951648    | 0.951648    | -5.629991938 |
| 1429968_at   | -0.004797413 | 6.732546997 | -0.062208054 | 0.951699331 | 0.951699331 | -5.629995922 |
| 1444453_at   | -0.005729655 | 3.919612294 | -0.062196299 | 0.951708445 | 0.951708445 | -5.629996629 |
| 1422611_s_at | -0.006930735 | 9.198081612 | -0.062189773 | 0.951713505 | 0.951713505 | -5.629997021 |
| 1448038_at   | 0.004291776  | 6.233681777 | 0.062186686  | 0.951715899 | 0.951715899 | -5.629997207 |
| 1444915_at   | 0.004210477  | 3.200096502 | 0.062137493  | 0.95175404  | 0.95175404  | -5.630000163 |
| 1456916_at   | -0.006626297 | 7.303515157 | -0.062112144 | 0.951773694 | 0.951773694 | -5.630001686 |
| 1441952_x_at | -0.005825841 | 7.129448002 | -0.062111118 | 0.951774489 | 0.951774489 | -5.630001747 |
| 1434945_at   | 0.008764713  | 6.577087784 | 0.062101539  | 0.951781916 | 0.951781916 | -5.630002322 |
| 1417157_at   | 0.00439209   | 10.20743956 | 0.061997335  | 0.95186271  | 0.95186271  | -5.630008573 |
| 1458261_at   | 0.008091888  | 5.753923944 | 0.061987504  | 0.951870332 | 0.951870332 | -5.630009162 |
| 1431266_at   | 0.009354975  | 5.361015605 | 0.061928803  | 0.951915845 | 0.951915845 | -5.630012679 |
| 1447783_x_at | 0.004230604  | 7.501910177 | 0.061918751  | 0.951923639 | 0.951923639 | -5.63001328  |
| 1440131_at   | 0.006319434  | 5.387596759 | 0.061901209  | 0.951937241 | 0.951937241 | -5.63001433  |
| 1460397_at   | 0.00649103   | 7.517012742 | 0.061838001  | 0.951986249 | 0.951986249 | -5.630018111 |
| 1419260_a_at | 0.004063758  | 10.74356305 | 0.061745899  | 0.95205766  | 0.95205766  | -5.630023613 |
| 1446040_at   | -0.004692692 | 6.34957436  | -0.061721322 | 0.952076717 | 0.952076717 | -5.63002508  |
| 1416024_x_at | -0.003867481 | 11.95404746 | -0.061690978 | 0.952100243 | 0.952100243 | -5.63002689  |
| 1445442_at   | -0.008074848 | 4.26140113  | -0.061674728 | 0.952112843 | 0.952112843 | -5.630027859 |
| 1447842_x_at | 0.005191683  | 9.202695175 | 0.061671913  | 0.952115026 | 0.952115026 | -5.630028027 |
| 1452167_at   | 0.005179623  | 10.1689174  | 0.061618884  | 0.952156143 | 0.952156143 | -5.630031187 |
| 1443078_at   | 0.003997618  | 7.362472454 | 0.061559845  | 0.952201919 | 0.952201919 | -5.630034703 |
| 1459632_at   | -0.005167468 | 7.131513386 | -0.061551856 | 0.952208114 | 0.952208114 | -5.630035178 |
| 1454142_a_at | -0.004643413 | 8.174086622 | -0.061545137 | 0.952213323 | 0.952213323 | -5.630035578 |
| 1439294_at   | 0.004614292  | 3.968848776 | 0.061491272  | 0.952255088 | 0.952255088 | -5.630038782 |
| 1425567_a_at | -0.003951425 | 11.49150399 | -0.06142362  | 0.952307543 | 0.952307543 | -5.630042801 |
| 1436721_x_at | -0.004967384 | 3.490865363 | -0.061396194 | 0.952328809 | 0.952328809 | -5.63004443  |
| 1427180_at   | 0.005170743  | 7.926395183 | 0.061374216  | 0.95234585  | 0.95234585  | -5.630045734 |
| 1449724_s_at | -0.004342509 | 9.990756312 | -0.061327649 | 0.952381957 | 0.952381957 | -5.630048496 |
| 1448975_s_at | 0.008380617  | 3.563552309 | 0.061325792  | 0.952383397 | 0.952383397 | -5.630048606 |
| 1416358_at   | 0.004721843  | 8.152573556 | 0.061289058  | 0.95241188  | 0.95241188  | -5.630050783 |
| 1438026_at   | -0.00367902  | 7.720802273 | -0.061276716 | 0.952421449 | 0.952421449 | -5.630051514 |
| 1445013_at   | 0.004770743  | 3.406694623 | 0.061165989  | 0.952507305 | 0.952507305 | -5.630058068 |
| 1433268_at   | 0.004499223  | 4.329845924 | 0.061136712  | 0.952530006 | 0.952530006 | -5.630059799 |
| 1442040_at   | -0.003625756 | 4.305997792 | -0.061132702 | 0.952533115 | 0.952533115 | -5.630060036 |
| 1437735_at   | -0.004029518 | 9.806570918 | -0.061050033 | 0.952597216 | 0.952597216 | -5.630064919 |
| 1457083_at   | 0.005761925  | 6.276838673 | 0.061013856  | 0.952625268 | 0.952625268 | -5.630067053 |
| 1422550_a_at | -0.00485357  | 5.621148996 | -0.061008299 | 0.952629577 | 0.952629577 | -5.630067381 |
| 1444114_at   | 0.00628194   | 7.094735896 | 0.060927203  | 0.952692458 | 0.952692458 | -5.630072161 |

|              |              |             |              |             |             |              |
|--------------|--------------|-------------|--------------|-------------|-------------|--------------|
| 1433650_at   | -0.005796176 | 6.298619366 | -0.060904119 | 0.952710357 | 0.952710357 | -5.630073521 |
| 1453583_at   | 0.004169318  | 7.090816963 | 0.060894948  | 0.952717469 | 0.952717469 | -5.630074061 |
| 1441775_at   | -0.006515745 | 5.32154284  | -0.060871061 | 0.95273599  | 0.95273599  | -5.630075467 |
| 1441003_at   | 0.005399061  | 6.308214139 | 0.06082123   | 0.952774629 | 0.952774629 | -5.630078398 |
| 1447833_x_at | -0.004465168 | 7.300945134 | -0.060810574 | 0.952782892 | 0.952782892 | -5.630079024 |
| 1448174_at   | 0.003920894  | 9.893354941 | 0.060802016  | 0.952789528 | 0.952789528 | -5.630079528 |
| 1456943_a_at | -0.007514717 | 4.969885813 | -0.060796546 | 0.95279377  | 0.95279377  | -5.630079849 |
| 1444938_at   | -0.004075816 | 3.989519443 | -0.060713076 | 0.952858493 | 0.952858493 | -5.630084752 |
| 1456603_at   | -0.005311972 | 10.10909239 | -0.060674858 | 0.952888128 | 0.952888128 | -5.630086994 |
| 1417257_at   | -0.005152847 | 4.235129412 | -0.060670935 | 0.952891169 | 0.952891169 | -5.630087225 |
| 1431565_at   | -0.004191926 | 3.903025506 | -0.060662263 | 0.952897894 | 0.952897894 | -5.630087733 |
| 1430063_at   | -0.005241459 | 4.591495373 | -0.060628857 | 0.952923797 | 0.952923797 | -5.630089692 |
| 1440593_at   | 0.00567938   | 7.82195685  | 0.06060859   | 0.952939513 | 0.952939513 | -5.63009088  |
| 1446821_at   | 0.004888931  | 3.260480824 | 0.060563355  | 0.952974588 | 0.952974588 | -5.630093529 |
| 1425883_at   | -0.003639208 | 6.15242731  | -0.060492106 | 0.953029836 | 0.953029836 | -5.630097699 |
| 1440164_x_at | 0.004496044  | 5.99930689  | 0.060491434  | 0.953030357 | 0.953030357 | -5.630097738 |
| 1420478_at   | 0.004187174  | 11.87302453 | 0.060448414  | 0.953063716 | 0.953063716 | -5.630100253 |
| 1454910_at   | 0.004998796  | 7.40431738  | 0.060447304  | 0.953064577 | 0.953064577 | -5.630100318 |
| 1417511_at   | 0.003938824  | 9.3113055   | 0.060444181  | 0.953066999 | 0.953066999 | -5.6301005   |
| 1452640_at   | 0.007105229  | 3.936642741 | 0.060409803  | 0.953093656 | 0.953093656 | -5.630102509 |
| 1426865_a_at | 0.005391728  | 9.101000724 | 0.060407659  | 0.953095318 | 0.953095318 | -5.630102634 |
| 1448395_at   | -0.008636021 | 9.510777685 | -0.060369767 | 0.9531247   | 0.9531247   | -5.630104846 |
| 1417176_at   | -0.004766467 | 9.478382462 | -0.060295511 | 0.953182281 | 0.953182281 | -5.630109177 |
| 1451668_at   | 0.003591768  | 8.812133162 | 0.060261182  | 0.953208901 | 0.953208901 | -5.630111178 |
| 1430385_a_at | -0.005290175 | 6.926259149 | -0.060251662 | 0.953216283 | 0.953216283 | -5.630111733 |
| 1428593_at   | 0.003979334  | 8.933111454 | 0.060193313  | 0.953261529 | 0.953261529 | -5.63011513  |
| 1458112_at   | 0.008337383  | 4.731864446 | 0.060141235  | 0.953301912 | 0.953301912 | -5.630118159 |
| 1416443_a_at | -0.003888822 | 10.70178518 | -0.060120848 | 0.953317721 | 0.953317721 | -5.630119344 |
| 1455986_at   | -0.006981549 | 5.170293834 | -0.060076467 | 0.953352135 | 0.953352135 | -5.630121923 |
| 1419707_at   | -0.007308107 | 3.919176935 | -0.059906114 | 0.953484235 | 0.953484235 | -5.630131804 |
| 1432547_at   | -0.004892261 | 3.915012116 | -0.059877412 | 0.953506493 | 0.953506493 | -5.630133466 |
| 1418347_at   | 0.005148968  | 8.147921912 | 0.059865702  | 0.953515573 | 0.953515573 | -5.630134143 |
| 1447080_at   | -0.005610085 | 4.293078591 | -0.059863735 | 0.953517098 | 0.953517098 | -5.630134257 |
| 1430585_at   | 0.00458763   | 7.958275545 | 0.05985396   | 0.953524678 | 0.953524678 | -5.630134823 |
| 1421295_at   | -0.006694304 | 7.456531961 | -0.059807919 | 0.953560381 | 0.953560381 | -5.630137486 |
| 1432867_at   | 0.003789119  | 4.503827865 | 0.059807142  | 0.953560984 | 0.953560984 | -5.630137531 |
| 1460371_at   | -0.005141257 | 7.616955541 | -0.0597973   | 0.953568615 | 0.953568615 | -5.6301381   |
| 1435712_a_at | 0.004826822  | 13.45126084 | 0.05971826   | 0.953629908 | 0.953629908 | -5.630142666 |
| 1424592_a_at | -0.005840452 | 4.004629194 | -0.0597143   | 0.953632979 | 0.953632979 | -5.630142895 |
| 1457142_at   | -0.006837706 | 3.591477054 | -0.059654174 | 0.953679604 | 0.953679604 | -5.630146365 |
| 1418396_at   | 0.00732549   | 5.366539449 | 0.059631181  | 0.953697435 | 0.953697435 | -5.63014769  |
| 1441460_at   | -0.004893823 | 6.105993901 | -0.059568092 | 0.953746357 | 0.953746357 | -5.630151326 |
| 1416485_at   | -0.003545633 | 10.9058137  | -0.059527621 | 0.953777742 | 0.953777742 | -5.630153656 |
| 1419418_a_at | -0.004043009 | 3.390011726 | -0.059514623 | 0.953787821 | 0.953787821 | -5.630154404 |
| 1453772_at   | -0.005388555 | 3.457373626 | -0.059513403 | 0.953788768 | 0.953788768 | -5.630154474 |
| 1445972_at   | 0.004516283  | 4.255833517 | 0.059477244  | 0.953816808 | 0.953816808 | -5.630156554 |
| 1423762_at   | 0.00471453   | 7.628123249 | 0.059442759  | 0.95384355  | 0.95384355  | -5.630158536 |
| 1419960_at   | 0.003901303  | 6.033331629 | 0.059415872  | 0.9538644   | 0.9538644   | -5.630160081 |
| 1435588_at   | 0.007060184  | 7.765680269 | 0.05940859   | 0.953870047 | 0.953870047 | -5.630160499 |
| 1419264_at   | -0.007432421 | 6.236731477 | -0.059407879 | 0.953870598 | 0.953870598 | -5.63016054  |
| 1449317_at   | 0.005031187  | 5.632390956 | 0.059390945  | 0.953883731 | 0.953883731 | -5.630161513 |
| 1457030_at   | 0.005179732  | 8.734373071 | 0.059311644  | 0.953945227 | 0.953945227 | -5.630166063 |
| 1454693_at   | 0.009157113  | 7.020608525 | 0.059278865  | 0.953970646 | 0.953970646 | -5.630167942 |



|              |              |             |              |             |             |              |
|--------------|--------------|-------------|--------------|-------------|-------------|--------------|
| 1445545_at   | 0.005510937  | 5.843336331 | 0.059249408  | 0.953993489 | 0.953993489 | -5.63016963  |
| 1446447_at   | -0.006660995 | 6.168680308 | -0.05924661  | 0.953995659 | 0.953995659 | -5.63016979  |
| 1426585_s_at | 0.004350027  | 10.51766944 | 0.059217699  | 0.95401808  | 0.95401808  | -5.630171446 |
| 1429079_a_at | -0.005509791 | 8.765550086 | -0.059114354 | 0.954098222 | 0.954098222 | -5.630177357 |
| 1454139_at   | 0.004862611  | 5.914979788 | 0.059093534  | 0.954114368 | 0.954114368 | -5.630178547 |
| 1449798_at   | 0.005169308  | 2.936924933 | 0.059076877  | 0.954127286 | 0.954127286 | -5.630179499 |
| 1421818_at   | 0.007090408  | 6.221999854 | 0.059031749  | 0.954162282 | 0.954162282 | -5.630182075 |
| 1459100_at   | 0.005614353  | 4.179412438 | 0.058992641  | 0.95419261  | 0.95419261  | -5.630184307 |
| 1449293_a_at | 0.004070095  | 8.804743935 | 0.058968183  | 0.954211578 | 0.954211578 | -5.630185701 |
| 1429317_at   | 0.00364693   | 6.056172383 | 0.058920815  | 0.954248311 | 0.954248311 | -5.630188401 |
| 1416787_at   | -0.005031669 | 4.892538081 | -0.058914248 | 0.954253404 | 0.954253404 | -5.630188775 |
| 1454323_at   | 0.004861312  | 4.42765364  | 0.058893474  | 0.954269514 | 0.954269514 | -5.630189958 |
| 1441622_at   | -0.004633158 | 3.689203963 | -0.058839268 | 0.954311551 | 0.954311551 | -5.630193043 |
| 1425969_a_at | -0.004015863 | 7.447442818 | -0.05883903  | 0.954311735 | 0.954311735 | -5.630193056 |
| 1444717_at   | -0.004601154 | 6.990666966 | -0.058812388 | 0.954332397 | 0.954332397 | -5.630194572 |
| 1428063_at   | 0.003653664  | 9.629438675 | 0.058773055  | 0.9543629   | 0.9543629   | -5.630196807 |
| 1436888_at   | -0.005536545 | 3.370423873 | -0.058745676 | 0.954384133 | 0.954384133 | -5.630198363 |
| 1440741_at   | 0.004159852  | 4.539931784 | 0.058667226  | 0.954444971 | 0.954444971 | -5.630202815 |
| 1439217_at   | -0.005389121 | 3.391267546 | -0.058655238 | 0.954454268 | 0.954454268 | -5.630203495 |
| 1436917_s_at | 0.009038646  | 8.209761392 | 0.058611424  | 0.954488247 | 0.954488247 | -5.630205979 |
| 1436446_at   | 0.003734148  | 7.390753491 | 0.05859248   | 0.954502938 | 0.954502938 | -5.630207052 |
| 1454969_at   | -0.00506968  | 7.623943761 | -0.058296258 | 0.954732665 | 0.954732665 | -5.63022379  |
| 1454727_at   | 0.004956365  | 8.007491957 | 0.05821359   | 0.954796777 | 0.954796777 | -5.630228447 |
| 1450361_at   | -0.005489094 | 4.783631833 | -0.058211964 | 0.954798038 | 0.954798038 | -5.630228538 |
| 1459326_at   | -0.005979496 | 5.694855913 | -0.058210271 | 0.954799351 | 0.954799351 | -5.630228633 |
| 1434987_at   | 0.005159924  | 6.299135962 | 0.058199325  | 0.95480784  | 0.95480784  | -5.630229249 |
| 1447299_at   | -0.003795299 | 3.448543299 | -0.058186458 | 0.954817819 | 0.954817819 | -5.630229973 |
| 1450827_at   | 0.005010406  | 4.470550562 | 0.05813675   | 0.95485637  | 0.95485637  | -5.630232768 |
| 1437005_a_at | 0.003839311  | 13.48406222 | 0.058122602  | 0.954867342 | 0.954867342 | -5.630233564 |
| 1458497_at   | 0.004513124  | 7.235057525 | 0.058110207  | 0.954876955 | 0.954876955 | -5.63023426  |
| 1446468_at   | -0.006161859 | 3.349940685 | -0.058071283 | 0.954907142 | 0.954907142 | -5.630236446 |
| 1450823_at   | 0.004206423  | 4.674027239 | 0.058062079  | 0.954914281 | 0.954914281 | -5.630236963 |
| 1433056_at   | -0.006413719 | 5.228381123 | -0.058060836 | 0.954915244 | 0.954915244 | -5.630237033 |
| 1451290_at   | -0.005260352 | 8.579374609 | -0.058047365 | 0.954925691 | 0.954925691 | -5.630237789 |
| 1415764_at   | 0.00461747   | 12.04398207 | 0.058028081  | 0.954940647 | 0.954940647 | -5.630238871 |
| 1438225_x_at | -0.004218798 | 6.240744409 | -0.057992698 | 0.954968088 | 0.954968088 | -5.630240855 |
| 1448271_a_at | 0.00402131   | 7.385404437 | 0.057968737  | 0.954986671 | 0.954986671 | -5.630242199 |
| 1427541_x_at | 0.005156495  | 7.466606045 | 0.05795243   | 0.954999318 | 0.954999318 | -5.630243112 |
| 1441631_at   | 0.005951531  | 4.923793617 | 0.057870056  | 0.955063204 | 0.955063204 | -5.630247725 |
| 1419067_a_at | 0.00459661   | 6.968794031 | 0.057801154  | 0.955116641 | 0.955116641 | -5.630251577 |
| 1443580_at   | -0.004123667 | 3.082009562 | -0.05779605  | 0.955120599 | 0.955120599 | -5.630251863 |
| 1435520_at   | 0.005956841  | 6.928793224 | 0.057768618  | 0.955141874 | 0.955141874 | -5.630253395 |
| 1436040_at   | 0.003726269  | 9.478853776 | 0.057704559  | 0.955191556 | 0.955191556 | -5.630256971 |
| 1459854_s_at | -0.008757292 | 8.778706096 | -0.057677677 | 0.955212405 | 0.955212405 | -5.63025847  |
| 1440305_at   | 0.005367101  | 5.836430918 | 0.057670169  | 0.955218228 | 0.955218228 | -5.630258889 |
| 1437290_at   | -0.006105782 | 9.061630947 | -0.057580548 | 0.955287735 | 0.955287735 | -5.630263882 |
| 1421174_at   | -0.004634846 | 4.023937963 | -0.057580266 | 0.955287954 | 0.955287954 | -5.630263898 |
| 1440139_at   | -0.009010402 | 4.861548424 | -0.057564803 | 0.955299946 | 0.955299946 | -5.630264759 |
| 1432715_at   | 0.004352454  | 3.977338712 | 0.057563875  | 0.955300666 | 0.955300666 | -5.63026481  |
| 1417748_x_at | 0.007591066  | 7.502454672 | 0.057538637  | 0.95532024  | 0.95532024  | -5.630266215 |
| 1440683_at   | 0.004436368  | 3.655604062 | 0.057513187  | 0.955339978 | 0.955339978 | -5.63026763  |
| 1417720_at   | 0.004661241  | 9.589750833 | 0.057507121  | 0.955344682 | 0.955344682 | -5.630267967 |
| 1436479_a_at | 0.004709857  | 6.901842295 | 0.057501063  | 0.955349381 | 0.955349381 | -5.630268304 |

|              |              |             |              |             |             |              |
|--------------|--------------|-------------|--------------|-------------|-------------|--------------|
| 1449600_at   | -0.003982627 | 3.683351468 | -0.057471976 | 0.95537194  | 0.95537194  | -5.630269921 |
| 1439746_at   | -0.007061801 | 5.272990142 | -0.057466436 | 0.955376237 | 0.955376237 | -5.630270229 |
| 1434510_at   | 0.005502316  | 8.875262585 | 0.057382082  | 0.95544166  | 0.95544166  | -5.630274912 |
| 1429027_at   | -0.005146839 | 9.170087592 | -0.057323155 | 0.955487362 | 0.955487362 | -5.630278179 |
| 1417964_at   | -0.004435378 | 10.25037023 | -0.057274965 | 0.955524738 | 0.955524738 | -5.630280849 |
| 1432301_a_at | 0.004472375  | 3.247989094 | 0.057255639  | 0.955539726 | 0.955539726 | -5.630281919 |
| 1447745_at   | 0.006279412  | 5.241023105 | 0.057247579  | 0.955545977 | 0.955545977 | -5.630282365 |
| 1446839_at   | -0.003922909 | 4.648915909 | -0.057235357 | 0.955555457 | 0.955555457 | -5.630283042 |
| 1433065_at   | -0.003932646 | 3.918419411 | -0.057222773 | 0.955565217 | 0.955565217 | -5.630283738 |
| 1442891_at   | -0.004883345 | 3.228842706 | -0.057140469 | 0.955629051 | 0.955629051 | -5.630288288 |
| 1444360_at   | 0.004391699  | 3.615612817 | 0.057136006  | 0.955632512 | 0.955632512 | -5.630288535 |
| 1456990_at   | 0.006587631  | 5.150292862 | 0.057134812  | 0.955633438 | 0.955633438 | -5.630288601 |
| 1425469_a_at | 0.003972421  | 8.547767431 | 0.057126216  | 0.955640105 | 0.955640105 | -5.630289076 |
| 1436725_at   | -0.004692835 | 6.859498546 | -0.057113768 | 0.95564976  | 0.95564976  | -5.630289763 |
| 1419970_at   | -0.005473924 | 4.535517448 | -0.057109392 | 0.955653154 | 0.955653154 | -5.630290005 |
| 1424050_s_at | 0.006006269  | 9.83454161  | 0.057101197  | 0.95565951  | 0.95565951  | -5.630290457 |
| 1440451_at   | 0.006986147  | 3.708389935 | 0.056963658  | 0.955766185 | 0.955766185 | -5.630298041 |
| 1441586_at   | 0.005135768  | 4.314135698 | 0.056879934  | 0.955831121 | 0.955831121 | -5.630302649 |
| 1436247_at   | 0.006717805  | 8.412086656 | 0.056838013  | 0.955863634 | 0.955863634 | -5.630304953 |
| 1424321_at   | 0.005002518  | 8.874189125 | 0.056800123  | 0.955893023 | 0.955893023 | -5.630307035 |
| 1460510_a_at | 0.003970814  | 7.693419996 | 0.056786688  | 0.955903443 | 0.955903443 | -5.630307773 |
| 1440095_at   | -0.003957337 | 8.698268783 | -0.056749144 | 0.955932562 | 0.955932562 | -5.630309833 |
| 1450956_at   | 0.006054282  | 4.494805098 | 0.056717636  | 0.955957    | 0.955957    | -5.630311562 |
| 1446183_at   | -0.008778309 | 4.935611547 | -0.056713699 | 0.955960053 | 0.955960053 | -5.630311777 |
| 1438597_x_at | 0.004092716  | 11.44953884 | 0.056712559  | 0.955960937 | 0.955960937 | -5.63031184  |
| 1447679_s_at | 0.004600997  | 11.15596177 | 0.05666072   | 0.956001144 | 0.956001144 | -5.630314681 |
| 1429278_at   | -0.005216469 | 8.424932319 | -0.05665223  | 0.95600773  | 0.95600773  | -5.630315146 |
| 1459052_at   | -0.007969028 | 5.985586969 | -0.056592911 | 0.956053739 | 0.956053739 | -5.630318394 |
| 1431855_at   | -0.004618927 | 3.694026978 | -0.056579939 | 0.9560638   | 0.9560638   | -5.630319103 |
| 1417388_at   | -0.004279616 | 9.297756856 | -0.056521686 | 0.956108982 | 0.956108982 | -5.630322288 |
| 1434264_at   | -0.00888492  | 7.887523773 | -0.056492678 | 0.956131481 | 0.956131481 | -5.630323873 |
| 1430828_at   | 0.003902022  | 3.951579235 | 0.05648048   | 0.956140942 | 0.956140942 | -5.630324539 |
| 1416987_at   | -0.00606299  | 4.145024001 | -0.056472019 | 0.956147504 | 0.956147504 | -5.630325001 |
| 1453170_at   | -0.006770923 | 5.874117806 | -0.056440019 | 0.956172324 | 0.956172324 | -5.630326748 |
| 1443416_at   | -0.004820851 | 5.452985779 | -0.056405209 | 0.956199324 | 0.956199324 | -5.630328647 |
| 1415701_x_at | 0.003362238  | 13.86628548 | 0.056388287  | 0.956212449 | 0.956212449 | -5.63032957  |
| 1451756_at   | -0.003884757 | 7.375719156 | -0.056343219 | 0.956247405 | 0.956247405 | -5.630332026 |
| 1450062_a_at | 0.004857536  | 11.58093043 | 0.056343142  | 0.956247465 | 0.956247465 | -5.63033203  |
| 1452040_a_at | 0.004185864  | 9.67932219  | 0.056297786  | 0.956282644 | 0.956282644 | -5.63033345  |
| 1420658_at   | -0.005750658 | 5.018942092 | -0.056271938 | 0.956302693 | 0.956302693 | -5.630335906 |
| 1429124_s_at | -0.005868883 | 8.197944476 | -0.056267587 | 0.956306068 | 0.956306068 | -5.630336143 |
| 1439371_x_at | -0.00391993  | 8.986955057 | -0.056247576 | 0.956321589 | 0.956321589 | -5.630337232 |
| 1433464_at   | -0.006212767 | 8.299350371 | -0.056246648 | 0.956322309 | 0.956322309 | -5.630337282 |
| 1418651_at   | -0.008618866 | 7.311084104 | -0.056234095 | 0.956332045 | 0.956332045 | -5.630337965 |
| 1450078_at   | -0.008499371 | 8.226766573 | -0.056228033 | 0.956336747 | 0.956336747 | -5.630338294 |
| 1458168_at   | 0.005286117  | 3.576095389 | 0.056193541  | 0.9563635   | 0.9563635   | -5.630340169 |
| 1422313_a_at | -0.0075383   | 10.45355074 | -0.0561733   | 0.9563792   | 0.9563792   | -5.630341268 |
| 1446317_at   | 0.00407317   | 3.525255108 | 0.056139713  | 0.956405251 | 0.956405251 | -5.630343092 |
| 1449570_at   | -0.005280928 | 5.164850452 | -0.056104272 | 0.956432741 | 0.956432741 | -5.630345015 |
| 1421351_at   | -0.004844125 | 4.237279341 | -0.056048809 | 0.95647576  | 0.95647576  | -5.630348022 |
| 1439187_at   | -0.004025432 | 8.255577179 | -0.056027295 | 0.956492447 | 0.956492447 | -5.630349188 |
| 1459754_x_at | 0.006552425  | 4.736058643 | 0.056015064  | 0.956501934 | 0.956501934 | -5.63034985  |
| 1447915_x_at | 0.006841759  | 4.016284919 | 0.056004502  | 0.956510127 | 0.956510127 | -5.630350422 |

|              |              |             |              |             |             |              |
|--------------|--------------|-------------|--------------|-------------|-------------|--------------|
| 1435047_at   | -0.006010372 | 4.020451139 | -0.055916184 | 0.95657863  | 0.95657863  | -5.630355201 |
| 1416335_at   | 0.003691186  | 12.23397643 | 0.055910411  | 0.956583108 | 0.956583108 | -5.630355513 |
| 1441922_x_at | -0.005198891 | 5.868785787 | -0.055802816 | 0.956666564 | 0.956666564 | -5.630361323 |
| 1439671_at   | 0.006455619  | 6.789958453 | 0.055802801  | 0.956666575 | 0.956666575 | -5.630361324 |
| 1450153_at   | -0.004646303 | 7.088625922 | -0.055759692 | 0.956700014 | 0.956700014 | -5.630363649 |
| 1441248_at   | 0.006490333  | 6.774153837 | 0.055732834  | 0.956720846 | 0.956720846 | -5.630365097 |
| 1422913_at   | 0.003734438  | 4.758945973 | 0.055705767  | 0.956741841 | 0.956741841 | -5.630366555 |
| 1434485_a_at | 0.004031153  | 9.890709148 | 0.055699667  | 0.956746573 | 0.956746573 | -5.630366884 |
| 1435810_at   | -0.005265214 | 7.460847178 | -0.055697479 | 0.95674827  | 0.95674827  | -5.630367001 |
| 1445460_at   | 0.006262065  | 6.2778607   | 0.05569362   | 0.956751262 | 0.956751262 | -5.630367209 |
| 1432876_at   | 0.005643583  | 5.254457316 | 0.055692909  | 0.956751815 | 0.956751815 | -5.630367248 |
| 1428090_at   | 0.003808547  | 9.48912522  | 0.05567122   | 0.956768637 | 0.956768637 | -5.630368415 |
| 1427124_at   | -0.005434212 | 5.527267748 | -0.0556609   | 0.956776643 | 0.956776643 | -5.630368971 |
| 1429412_at   | 0.006753412  | 5.184621783 | 0.055554765  | 0.956858967 | 0.956858967 | -5.630374677 |
| 1419000_at   | 0.005979839  | 5.450671488 | 0.055535955  | 0.956873558 | 0.956873558 | -5.630375687 |
| 1433722_at   | 0.00430294   | 9.441605473 | 0.0555331    | 0.956875772 | 0.956875772 | -5.63037584  |
| 1459561_at   | -0.004157135 | 4.206746753 | -0.055477023 | 0.95691927  | 0.95691927  | -5.63037885  |
| 1451328_at   | 0.003731546  | 9.250632973 | 0.055452117  | 0.956938588 | 0.956938588 | -5.630380185 |
| 1439390_at   | -0.0051569   | 3.242197156 | -0.055438196 | 0.956949387 | 0.956949387 | -5.630380932 |
| 1451132_at   | -0.004831478 | 8.425798578 | -0.055432    | 0.956954193 | 0.956954193 | -5.630381264 |
| 1450809_at   | 0.004471559  | 3.1654866   | 0.055395952  | 0.956982154 | 0.956982154 | -5.630383195 |
| 1424790_at   | -0.003874915 | 7.261710447 | -0.055394699 | 0.956983126 | 0.956983126 | -5.630383262 |
| 1439896_at   | 0.004301114  | 5.276594863 | 0.055362162  | 0.957008364 | 0.957008364 | -5.630385004 |
| 1436972_at   | -0.003486206 | 4.374237184 | -0.05533296  | 0.957031015 | 0.957031015 | -5.630386567 |
| 1447619_at   | -0.004262787 | 4.511579764 | -0.055279747 | 0.957072292 | 0.957072292 | -5.630389413 |
| 1421663_at   | -0.007319976 | 5.320516359 | -0.055254674 | 0.95709174  | 0.95709174  | -5.630390752 |
| 1445092_at   | 0.005615312  | 4.162413247 | 0.055214831  | 0.957122646 | 0.957122646 | -5.63039288  |
| 1426660_x_at | 0.003648318  | 13.71359813 | 0.055130137  | 0.957188342 | 0.957188342 | -5.630397398 |
| 1418904_at   | 0.005545095  | 3.794776045 | 0.055127919  | 0.957190062 | 0.957190062 | -5.630397516 |
| 1423086_at   | 0.008832316  | 6.859111091 | 0.055120706  | 0.957195657 | 0.957195657 | -5.630397901 |
| 1449276_at   | 0.004981106  | 4.83050489  | 0.055091064  | 0.95721865  | 0.95721865  | -5.63039948  |
| 1450896_at   | 0.01628205   | 6.748899294 | 0.055067489  | 0.957236936 | 0.957236936 | -5.630400736 |
| 1417070_at   | -0.003862552 | 3.916857094 | -0.054994557 | 0.95729351  | 0.95729351  | -5.630404616 |
| 1432593_at   | 0.004482116  | 5.769652143 | 0.054977325  | 0.957306876 | 0.957306876 | -5.630405532 |
| 1445409_at   | -0.004311509 | 3.267396791 | -0.054940575 | 0.957335383 | 0.957335383 | -5.630407485 |
| 1457097_at   | 0.004981676  | 5.667443772 | 0.054937366  | 0.957337872 | 0.957337872 | -5.630407656 |
| 1431883_at   | -0.003899833 | 4.490322451 | -0.054912519 | 0.957357146 | 0.957357146 | -5.630408975 |
| 1436581_at   | 0.003936905  | 8.111199606 | 0.054909695  | 0.957359336 | 0.957359336 | -5.630409125 |
| 1429445_at   | -0.004796341 | 3.822462328 | -0.054875786 | 0.95738564  | 0.95738564  | -5.630410925 |
| 1420398_at   | -0.004829952 | 3.668206068 | -0.054823796 | 0.957425968 | 0.957425968 | -5.630413682 |
| 1450186_s_at | 0.004666573  | 13.36266341 | 0.054822102  | 0.957427283 | 0.957427283 | -5.630413772 |
| 1458173_at   | 0.004027378  | 3.315458036 | 0.054819123  | 0.957429593 | 0.957429593 | -5.63041393  |
| 1426237_at   | 0.004594114  | 5.479850405 | 0.054818886  | 0.957429777 | 0.957429777 | -5.630413942 |
| 1426834_s_at | -0.00455604  | 9.070749084 | -0.054812568 | 0.957434678 | 0.957434678 | -5.630414277 |
| 1454132_at   | -0.004146624 | 3.237545898 | -0.054787968 | 0.95745376  | 0.95745376  | -5.63041558  |
| 1442390_at   | -0.003995114 | 5.792570479 | -0.054779775 | 0.957460115 | 0.957460115 | -5.630416014 |
| 1457542_at   | -0.006002689 | 5.053545697 | -0.054774359 | 0.957464317 | 0.957464317 | -5.630416301 |
| 1446137_at   | -0.006169571 | 4.687420878 | -0.0547627   | 0.95747336  | 0.95747336  | -5.630416919 |
| 1419161_a_at | 0.004235692  | 6.381654423 | 0.054749894  | 0.957483295 | 0.957483295 | -5.630417597 |
| 1421989_s_at | 0.004375108  | 7.509048611 | 0.05471641   | 0.957509268 | 0.957509268 | -5.630419369 |
| 1452365_at   | -0.005901649 | 6.220368485 | -0.054675571 | 0.957540947 | 0.957540947 | -5.630421528 |
| 1453699_at   | 0.00423872   | 3.242332024 | 0.054651717  | 0.957559451 | 0.957559451 | -5.630422789 |
| 1451458_at   | -0.004471541 | 9.774621918 | -0.054557464 | 0.957632564 | 0.957632564 | -5.630427765 |

|              |              |             |              |             |             |              |
|--------------|--------------|-------------|--------------|-------------|-------------|--------------|
| 1437252_at   | 0.003347593  | 6.917374025 | 0.054548835  | 0.957639258 | 0.957639258 | -5.63042822  |
| 1454565_at   | -0.004181741 | 3.731792776 | -0.054548194 | 0.957639755 | 0.957639755 | -5.630428254 |
| 1459452_at   | 0.00370174   | 3.079778693 | 0.054534798  | 0.957650146 | 0.957650146 | -5.630428961 |
| 1442613_at   | 0.006547647  | 4.191232636 | 0.054531514  | 0.957652693 | 0.957652693 | -5.630429134 |
| 1437949_x_at | -0.007456163 | 5.73377902  | -0.054507172 | 0.957671576 | 0.957671576 | -5.630430417 |
| 1449523_at   | -0.006657433 | 9.008575703 | -0.054374333 | 0.957774622 | 0.957774622 | -5.630437409 |
| 1455330_at   | 0.004003449  | 8.267153709 | 0.054277208  | 0.957849964 | 0.957849964 | -5.630442511 |
| 1452211_at   | -0.00376407  | 10.16160661 | -0.054258953 | 0.957864125 | 0.957864125 | -5.630443469 |
| 1448166_a_at | -0.003440825 | 11.22538052 | -0.05422647  | 0.957889323 | 0.957889323 | -5.630445172 |
| 1446707_at   | 0.005222335  | 3.937416781 | 0.054183359  | 0.957922765 | 0.957922765 | -5.630447432 |
| 1453800_at   | -0.00330388  | 5.637337505 | -0.054092671 | 0.957993115 | 0.957993115 | -5.630452179 |
| 1439614_at   | -0.005179976 | 3.23636993  | -0.054074939 | 0.95800687  | 0.95800687  | -5.630453106 |
| 1417063_at   | 0.012622177  | 7.734370289 | 0.054067935  | 0.958012303 | 0.958012303 | -5.630453472 |
| 1425698_a_at | 0.008407729  | 7.565758282 | 0.054037634  | 0.958035809 | 0.958035809 | -5.630455056 |
| 1452433_at   | 0.00870529   | 8.175753817 | 0.054016354  | 0.958052317 | 0.958052317 | -5.630456167 |
| 1430169_at   | -0.006550156 | 5.214386004 | -0.054004606 | 0.95806143  | 0.95806143  | -5.630456781 |
| 1459830_at   | 0.00504657   | 7.887389781 | 0.053978882  | 0.958081385 | 0.958081385 | -5.630458124 |
| 1433880_at   | 0.003557064  | 8.126886884 | 0.053954537  | 0.958100271 | 0.958100271 | -5.630459394 |
| 1434800_at   | -0.004939636 | 4.892245981 | -0.053914911 | 0.958131011 | 0.958131011 | -5.630461461 |
| 1458419_at   | -0.003336648 | 5.972396142 | -0.053911077 | 0.958133985 | 0.958133985 | -5.630461661 |
| 1442927_at   | -0.004155901 | 4.545975603 | -0.053903429 | 0.958139918 | 0.958139918 | -5.630462059 |
| 1418313_at   | -0.004958298 | 6.817482808 | -0.053887484 | 0.958152287 | 0.958152287 | -5.63046289  |
| 1451655_at   | 0.006884935  | 4.515613494 | 0.053799191  | 0.95822078  | 0.95822078  | -5.630467487 |
| 1443728_at   | -0.010827589 | 5.478079571 | -0.053774983 | 0.95823956  | 0.95823956  | -5.630468746 |
| 1454992_at   | -0.004825553 | 8.258375424 | -0.053737719 | 0.958268467 | 0.958268467 | -5.630470682 |
| 1425340_a_at | -0.003647989 | 9.451162638 | -0.053685199 | 0.95830921  | 0.95830921  | -5.63047341  |
| 1418273_a_at | -0.004718497 | 12.95298963 | -0.05368404  | 0.958310109 | 0.958310109 | -5.63047347  |
| 1433836_a_at | -0.004716827 | 8.940008205 | -0.053646409 | 0.958339301 | 0.958339301 | -5.630475423 |
| 1421886_at   | 0.004574222  | 3.455152434 | 0.053594275  | 0.958379744 | 0.958379744 | -5.630478126 |
| 1428192_at   | 0.007926788  | 6.198539285 | 0.053588061  | 0.958384565 | 0.958384565 | -5.630478447 |
| 1438245_at   | 0.003895046  | 10.19042749 | 0.05357262   | 0.958396543 | 0.958396543 | -5.630479247 |
| 1428401_at   | -0.005537214 | 9.379625948 | -0.053542142 | 0.958420187 | 0.958420187 | -5.630480826 |
| 1441438_at   | 0.004528976  | 9.006103166 | 0.053526402  | 0.958432397 | 0.958432397 | -5.63048164  |
| 1448385_at   | -0.00455868  | 7.533955018 | -0.053446323 | 0.958494519 | 0.958494519 | -5.630485782 |
| 1437294_at   | -0.004088526 | 7.651093688 | -0.053410806 | 0.958522073 | 0.958522073 | -5.630487617 |
| 1431739_at   | 0.004789433  | 3.458333315 | 0.053370725  | 0.958553166 | 0.958553166 | -5.630489686 |
| 1433659_at   | 0.005417563  | 7.689801051 | 0.053367155  | 0.958555936 | 0.958555936 | -5.63048987  |
| 1457199_at   | 0.011022436  | 5.672185731 | 0.053359505  | 0.95856187  | 0.95856187  | -5.630490265 |
| 1416312_at   | 0.003683992  | 10.02738829 | 0.053337209  | 0.958579166 | 0.958579166 | -5.630491415 |
| 1433107_at   | 0.004707794  | 5.086092414 | 0.053335061  | 0.958580833 | 0.958580833 | -5.630491525 |
| 1459347_at   | -0.004668724 | 5.380114949 | -0.053333657 | 0.958581922 | 0.958581922 | -5.630491598 |
| 1439052_at   | 0.006082075  | 4.257986165 | 0.053263873  | 0.958636058 | 0.958636058 | -5.630495194 |
| 1435939_s_at | 0.003582963  | 3.63722932  | 0.053252228  | 0.958645092 | 0.958645092 | -5.630495794 |
| 1444673_at   | -0.003912452 | 4.593167794 | -0.053230373 | 0.958662047 | 0.958662047 | -5.630496919 |
| 1450363_at   | 0.010924506  | 4.938796569 | 0.053160481  | 0.958716267 | 0.958716267 | -5.630500514 |
| 1418614_at   | -0.004273202 | 3.601940226 | -0.053159181 | 0.958717276 | 0.958717276 | -5.63050058  |
| 1446978_at   | -0.006760712 | 4.644338708 | -0.053144829 | 0.95872841  | 0.95872841  | -5.630501318 |
| 1416952_at   | -0.00424634  | 9.618136151 | -0.053142276 | 0.958730391 | 0.958730391 | -5.630501449 |
| 1452037_at   | -0.004380838 | 9.085713382 | -0.053130463 | 0.958739555 | 0.958739555 | -5.630502056 |
| 1451519_at   | -0.003753826 | 10.03277524 | -0.053128472 | 0.9587411   | 0.9587411   | -5.630502158 |
| 1452939_a_at | -0.004939045 | 5.179743503 | -0.053120738 | 0.958747099 | 0.958747099 | -5.630502556 |
| 1438453_at   | -0.003655112 | 7.426640325 | -0.053101454 | 0.958762059 | 0.958762059 | -5.630503546 |
| 1438518_at   | 0.005674635  | 5.975709014 | 0.053050924  | 0.95880126  | 0.95880126  | -5.630506139 |

|              |              |             |              |             |             |              |
|--------------|--------------|-------------|--------------|-------------|-------------|--------------|
| 1427992_a_at | 0.003385491  | 8.399507613 | 0.05301343   | 0.958830347 | 0.958830347 | -5.630508062 |
| 1427288_at   | 0.006081405  | 5.031495971 | 0.053004636  | 0.958837169 | 0.958837169 | -5.630508512 |
| 1433070_at   | 0.004949165  | 4.99123815  | 0.052982437  | 0.958854391 | 0.958854391 | -5.63050965  |
| 1439748_at   | 0.004680682  | 4.540715511 | 0.052976164  | 0.958859258 | 0.958859258 | -5.630509971 |
| 1436141_at   | -0.005850393 | 4.623164385 | -0.052947283 | 0.958881663 | 0.958881663 | -5.63051145  |
| 1457491_at   | -0.005176702 | 5.318723811 | -0.052928452 | 0.958896272 | 0.958896272 | -5.630512414 |
| 1455127_at   | 0.005054521  | 6.166387346 | 0.052904744  | 0.958914664 | 0.958914664 | -5.630513627 |
| 1420303_x_at | -0.005472239 | 4.903345275 | -0.052875786 | 0.95893713  | 0.95893713  | -5.630515108 |
| 1440822_x_at | -0.005394025 | 8.738699252 | -0.052863022 | 0.958947032 | 0.958947032 | -5.63051576  |
| 1426071_at   | 0.005063767  | 5.314437211 | 0.052862254  | 0.958947628 | 0.958947628 | -5.6305158   |
| 1449364_at   | 0.003278737  | 4.090609633 | 0.052745631  | 0.959038103 | 0.959038103 | -5.630521754 |
| 1428955_x_at | 0.006627088  | 6.488327371 | 0.052732326  | 0.959048425 | 0.959048425 | -5.630522432 |
| 1435806_at   | 0.005443617  | 6.99663109  | 0.052713746  | 0.959062839 | 0.959062839 | -5.63052338  |
| 1440106_at   | 0.007084027  | 5.748984314 | 0.052656925  | 0.959106921 | 0.959106921 | -5.630526274 |
| 1451003_at   | -0.003825867 | 10.21669624 | -0.052652646 | 0.959110241 | 0.959110241 | -5.630526492 |
| 1458318_at   | -0.008795991 | 3.311100713 | -0.052647975 | 0.959113865 | 0.959113865 | -5.63052673  |
| 1440508_at   | -0.004761965 | 4.131603173 | -0.052647263 | 0.959114417 | 0.959114417 | -5.630526766 |
| 1442789_at   | -0.003446336 | 4.804240893 | -0.052631797 | 0.959126415 | 0.959126415 | -5.630527553 |
| 1422216_at   | -0.005134371 | 5.938373044 | -0.052622853 | 0.959133354 | 0.959133354 | -5.630528008 |
| 1415838_at   | 0.003795538  | 10.59973522 | 0.052507821  | 0.959222597 | 0.959222597 | -5.630533855 |
| 1446180_at   | -0.007178944 | 5.130649301 | -0.052487508 | 0.959238355 | 0.959238355 | -5.630534886 |
| 1432954_at   | -0.003283943 | 4.096707583 | -0.052464523 | 0.959256187 | 0.959256187 | -5.630536052 |
| 1428254_at   | -0.004098303 | 9.534427543 | -0.052427874 | 0.95928462  | 0.95928462  | -5.630537911 |
| 1456667_at   | 0.003817756  | 8.273576523 | 0.052426505  | 0.959285682 | 0.959285682 | -5.63053798  |
| 1445423_at   | -0.004017177 | 3.620473388 | -0.052397366 | 0.959308289 | 0.959308289 | -5.630539457 |
| 1422962_a_at | 0.007947353  | 5.994645176 | 0.052357847  | 0.959338948 | 0.959338948 | -5.630541458 |
| 1455955_s_at | 0.003887074  | 11.7014249  | 0.052324919  | 0.959364494 | 0.959364494 | -5.630543125 |
| 1457278_at   | 0.004473743  | 3.986958503 | 0.052301555  | 0.95938262  | 0.95938262  | -5.630544306 |
| 1443690_at   | 0.003524897  | 4.392480867 | 0.052299551  | 0.959384175 | 0.959384175 | -5.630544408 |
| 1437022_at   | 0.00372468   | 8.307768349 | 0.052287692  | 0.959393376 | 0.959393376 | -5.630545007 |
| 1426302_at   | -0.005928526 | 5.877207023 | -0.052275621 | 0.959402741 | 0.959402741 | -5.630545618 |
| 1421733_a_at | -0.004332421 | 10.07601358 | -0.052181369 | 0.959475863 | 0.959475863 | -5.630550377 |
| 1420168_at   | 0.003866303  | 3.769314117 | 0.052166385  | 0.959487488 | 0.959487488 | -5.630551133 |
| 1421933_at   | -0.006448231 | 6.851585432 | -0.052147284 | 0.959502307 | 0.959502307 | -5.630552096 |
| 1431504_at   | 0.003881223  | 5.150094865 | 0.052130129  | 0.959515616 | 0.959515616 | -5.630552961 |
| 1453312_at   | -0.004898983 | 8.051244854 | -0.052104668 | 0.95953537  | 0.95953537  | -5.630554244 |
| 1450578_at   | -0.004112273 | 3.198850406 | -0.052055743 | 0.959573327 | 0.959573327 | -5.630556708 |
| 1444600_at   | 0.009159978  | 4.540037041 | 0.052050323  | 0.959577532 | 0.959577532 | -5.630556981 |
| 1459412_at   | 0.006339846  | 4.27811677  | 0.051982582  | 0.959630088 | 0.959630088 | -5.630560388 |
| 1457780_at   | -0.004534834 | 4.971188544 | -0.05197667  | 0.959634674 | 0.959634674 | -5.630560685 |
| 1453977_at   | -0.00339405  | 3.682993205 | -0.051967102 | 0.959642097 | 0.959642097 | -5.630561166 |
| 1457171_at   | -0.004595411 | 6.545047076 | -0.051951466 | 0.959654228 | 0.959654228 | -5.630561951 |
| 1457069_at   | 0.006487204  | 6.856918962 | 0.051948902  | 0.959656217 | 0.959656217 | -5.63056208  |
| 1436595_at   | 0.004515102  | 7.938711464 | 0.051944543  | 0.959659599 | 0.959659599 | -5.630562299 |
| 1444876_at   | -0.003694047 | 6.187720328 | -0.051919175 | 0.959679281 | 0.959679281 | -5.630563573 |
| 1448161_a_at | -0.003983729 | 8.774908913 | -0.051873558 | 0.959714671 | 0.959714671 | -5.630565862 |
| 1447498_at   | -0.004084922 | 3.112010611 | -0.051859703 | 0.959725421 | 0.959725421 | -5.630566557 |
| 1426962_at   | 0.004903362  | 8.519278802 | 0.051852836  | 0.959730749 | 0.959730749 | -5.630566901 |
| 1416825_at   | 0.006557927  | 7.353355485 | 0.051840349  | 0.959740437 | 0.959740437 | -5.630567527 |
| 1450043_at   | -0.004578033 | 6.596541377 | -0.051726392 | 0.959828849 | 0.959828849 | -5.630573233 |
| 1425427_at   | 0.0042052    | 3.427442167 | 0.051712613  | 0.959839539 | 0.959839539 | -5.630573922 |
| 1418331_at   | -0.00427759  | 7.75293955  | -0.051695244 | 0.959853015 | 0.959853015 | -5.63057479  |
| 1423028_at   | 0.003603797  | 4.392669335 | 0.051475085  | 0.960023825 | 0.960023825 | -5.630585771 |

|              |              |             |              |             |             |              |
|--------------|--------------|-------------|--------------|-------------|-------------|--------------|
| 1458371_at   | -0.005629322 | 4.612296624 | -0.051453249 | 0.960040766 | 0.960040766 | -5.630586858 |
| 1437950_at   | -0.006046856 | 5.595886136 | -0.051404617 | 0.960078498 | 0.960078498 | -5.630589276 |
| 1417142_at   | -0.003966197 | 8.783401282 | -0.051392666 | 0.960087771 | 0.960087771 | -5.63058987  |
| 1437644_at   | -0.00422229  | 3.172372422 | -0.051364987 | 0.960109245 | 0.960109245 | -5.630591245 |
| 1438133_a_at | -0.004620499 | 7.501600346 | -0.051362191 | 0.960111415 | 0.960111415 | -5.630591384 |
| 1454107_a_at | -0.005479483 | 7.916885379 | -0.051323993 | 0.960141051 | 0.960141051 | -5.63059328  |
| 1427498_a_at | -0.003721193 | 7.033379555 | -0.051289658 | 0.96016769  | 0.96016769  | -5.630594984 |
| 1424729_at   | -0.006080672 | 4.520957791 | -0.051286765 | 0.960169934 | 0.960169934 | -5.630595127 |
| 1444587_at   | -0.006598037 | 3.908443914 | -0.051286011 | 0.96017052  | 0.96017052  | -5.630595165 |
| 1427576_at   | -0.004746332 | 4.154064622 | -0.051237491 | 0.960208164 | 0.960208164 | -5.63059757  |
| 1431509_at   | -0.005897703 | 4.179176367 | -0.051190039 | 0.96024498  | 0.96024498  | -5.630599919 |
| 1458863_at   | -0.003815628 | 5.968421616 | -0.051153919 | 0.960273005 | 0.960273005 | -5.630601707 |
| 1450535_at   | -0.00437408  | 7.470357402 | -0.051096437 | 0.960317603 | 0.960317603 | -5.630604548 |
| 1452591_a_at | 0.003765343  | 8.635957054 | 0.051072155  | 0.960336443 | 0.960336443 | -5.630605747 |
| 1423235_at   | -0.00319082  | 9.782921581 | -0.05102781  | 0.960370849 | 0.960370849 | -5.630607936 |
| 1439452_x_at | 0.003785707  | 9.923279874 | 0.051014196  | 0.960381412 | 0.960381412 | -5.630608608 |
| 1424066_at   | -0.00455345  | 8.381917845 | -0.051006426 | 0.960387441 | 0.960387441 | -5.630608991 |
| 1447431_at   | -0.003324426 | 4.209232906 | -0.051000056 | 0.960392383 | 0.960392383 | -5.630609305 |
| 1439424_x_at | -0.007253561 | 7.030806311 | -0.050967668 | 0.960417512 | 0.960417512 | -5.630610902 |
| 1424831_at   | 0.004109316  | 5.871943847 | 0.050955939  | 0.960426612 | 0.960426612 | -5.63061148  |
| 1447564_x_at | -0.003558376 | 3.103883384 | -0.050927517 | 0.960448665 | 0.960448665 | -5.63061288  |
| 1442887_at   | 0.004027794  | 3.65711452  | 0.0509069    | 0.96046466  | 0.96046466  | -5.630613895 |
| 1432911_at   | 0.003560898  | 4.301256217 | 0.050851006  | 0.960508027 | 0.960508027 | -5.630616645 |
| 1450271_at   | -0.003033285 | 3.467318478 | -0.050850186 | 0.960508664 | 0.960508664 | -5.630616685 |
| 1427037_at   | -0.00645454  | 9.399672227 | -0.050761788 | 0.96057725  | 0.96057725  | -5.630621028 |
| 1455395_at   | 0.008763553  | 5.694228436 | 0.050727517  | 0.960603841 | 0.960603841 | -5.630622709 |
| 1454540_at   | 0.003842167  | 4.92412967  | 0.050723403  | 0.960607033 | 0.960607033 | -5.630622911 |
| 1417517_at   | -0.007960276 | 8.405786257 | -0.050694701 | 0.960629302 | 0.960629302 | -5.630624318 |
| 1451965_at   | 0.004080764  | 4.801693259 | 0.050666534  | 0.960651157 | 0.960651157 | -5.630625699 |
| 1451818_at   | 0.003752462  | 5.608260455 | 0.050660577  | 0.960655779 | 0.960655779 | -5.63062599  |
| 1431682_at   | 0.003846801  | 3.781761785 | 0.050654354  | 0.960660607 | 0.960660607 | -5.630626295 |
| 1456828_at   | 0.003448727  | 3.227636823 | 0.050615021  | 0.960691125 | 0.960691125 | -5.630628221 |
| 1454636_at   | -0.005675521 | 10.65471577 | -0.050607796 | 0.960696731 | 0.960696731 | -5.630628575 |
| 1431381_at   | 0.005259997  | 5.559929195 | 0.050588859  | 0.960711424 | 0.960711424 | -5.630629501 |
| 1443820_x_at | -0.005154301 | 3.507086571 | -0.050510317 | 0.960772365 | 0.960772365 | -5.630633334 |
| 1460098_at   | -0.004622303 | 5.075603946 | -0.050498083 | 0.960781857 | 0.960781857 | -5.630633937 |
| 1440001_at   | 0.004526073  | 9.740005368 | 0.050481111  | 0.960795025 | 0.960795025 | -5.630634766 |
| 1432910_at   | -0.003274558 | 8.22126724  | -0.050440231 | 0.960826744 | 0.960826744 | -5.630636761 |
| 1425919_at   | 0.003962395  | 5.809823392 | 0.050329964  | 0.9609123   | 0.9609123   | -5.630642133 |
| 1447909_s_at | -0.004616412 | 10.87389726 | -0.050315178 | 0.960923772 | 0.960923772 | -5.630642852 |
| 1430760_a_at | -0.004408686 | 3.310117275 | -0.050271426 | 0.96095772  | 0.96095772  | -5.63064498  |
| 1444720_at   | 0.0056145    | 5.882854725 | 0.050208313  | 0.96100669  | 0.96100669  | -5.630648046 |
| 1453044_at   | -0.010789255 | 5.521121671 | -0.050191125 | 0.961020026 | 0.961020026 | -5.63064888  |
| 1422471_at   | -0.004296695 | 9.561293515 | -0.050119319 | 0.961075741 | 0.961075741 | -5.630652362 |
| 1421414_a_at | 0.005100839  | 6.93048845  | 0.050114362  | 0.961079587 | 0.961079587 | -5.630652602 |
| 1426764_at   | 0.003315926  | 9.839075296 | 0.050027825  | 0.961146733 | 0.961146733 | -5.630656792 |
| 1442056_at   | -0.003461978 | 7.523569927 | -0.05001233  | 0.961158756 | 0.961158756 | -5.630657542 |
| 1457416_at   | 0.004121217  | 7.413302539 | 0.050008312  | 0.961161873 | 0.961161873 | -5.630657736 |
| 1441098_at   | 0.003613874  | 5.957817621 | 0.049967273  | 0.961193716 | 0.961193716 | -5.63065972  |
| 1445457_at   | 0.003619394  | 3.88293889  | 0.049929559  | 0.961222979 | 0.961222979 | -5.630661541 |
| 1456687_at   | 0.004464938  | 4.932998169 | 0.049913337  | 0.961235566 | 0.961235566 | -5.630662324 |
| 1425337_at   | -0.00550535  | 4.515561015 | -0.049896526 | 0.96124861  | 0.96124861  | -5.630663135 |
| 1419211_s_at | -0.003657811 | 7.661574885 | -0.049842196 | 0.961290766 | 0.961290766 | -5.630665755 |

|              |              |             |              |             |             |              |
|--------------|--------------|-------------|--------------|-------------|-------------|--------------|
| 1441677_at   | -0.004306779 | 7.636190535 | -0.0498345   | 0.961296737 | 0.961296737 | -5.630666126 |
| 1432684_at   | 0.004021355  | 3.965979672 | 0.049818046  | 0.961309505 | 0.961309505 | -5.630666919 |
| 1426162_a_at | -0.003017074 | 13.40026469 | -0.049794236 | 0.96132798  | 0.96132798  | -5.630668065 |
| 1425227_a_at | 0.005310817  | 4.80570934  | 0.049753028  | 0.961359954 | 0.961359954 | -5.630670049 |
| 1435740_at   | -0.005844681 | 10.42230585 | -0.049747379 | 0.961364338 | 0.961364338 | -5.63067032  |
| 1438438_at   | -0.004220699 | 7.000241176 | -0.049745142 | 0.961366073 | 0.961366073 | -5.630670428 |
| 1442508_at   | -0.00486901  | 5.359947564 | -0.049677336 | 0.961418685 | 0.961418685 | -5.630673687 |
| 1423811_at   | -0.003194514 | 9.670750039 | -0.049645831 | 0.961443132 | 0.961443132 | -5.6306752   |
| 1445856_at   | 0.005167645  | 4.140978107 | 0.049640419  | 0.961447331 | 0.961447331 | -5.63067546  |
| 1429011_x_at | 0.005714124  | 5.785647835 | 0.049592274  | 0.961484688 | 0.961484688 | -5.63067777  |
| 1446728_at   | -0.003973135 | 3.126271769 | -0.049529852 | 0.961533124 | 0.961533124 | -5.630680761 |
| 1422602_a_at | -0.005050147 | 5.520033997 | -0.049520847 | 0.961540111 | 0.961540111 | -5.630681192 |
| 1432003_a_at | 0.008032495  | 8.17558716  | 0.049446081  | 0.961598125 | 0.961598125 | -5.63068477  |
| 1436826_at   | 0.004003467  | 8.481780404 | 0.049428807  | 0.961611529 | 0.961611529 | -5.630685595 |
| 1460329_at   | -0.003497654 | 8.835412819 | -0.049418304 | 0.961619678 | 0.961619678 | -5.630686097 |
| 1434911_s_at | -0.004011544 | 7.533413086 | -0.049401618 | 0.961632625 | 0.961632625 | -5.630686894 |
| 1448175_at   | 0.004835692  | 7.602526174 | 0.049355079  | 0.961668738 | 0.961668738 | -5.630689116 |
| 1456896_at   | -0.003630827 | 8.288367715 | -0.049354402 | 0.961669262 | 0.961669262 | -5.630689149 |
| 1433094_at   | -0.003570884 | 3.966061571 | -0.049353695 | 0.961669811 | 0.961669811 | -5.630689183 |
| 1439517_at   | -0.0032842   | 7.42373574  | -0.049352465 | 0.961670766 | 0.961670766 | -5.630689241 |
| 1442287_at   | -0.004393894 | 4.769653654 | -0.04933669  | 0.961683007 | 0.961683007 | -5.630689994 |
| 1431816_at   | 0.00415386   | 3.879612256 | 0.049301813  | 0.961710069 | 0.961710069 | -5.630691657 |
| 1429860_at   | 0.004812023  | 5.972022762 | 0.049267928  | 0.961736362 | 0.961736362 | -5.630693272 |
| 1455637_x_at | 0.004387568  | 6.233401116 | 0.049209736  | 0.961781516 | 0.961781516 | -5.630696043 |
| 1442793_s_at | -0.003790432 | 8.277219123 | -0.049193229 | 0.961794325 | 0.961794325 | -5.630696828 |
| 1416942_at   | -0.005593972 | 5.525219053 | -0.049172495 | 0.961810413 | 0.961810413 | -5.630697814 |
| 1431569_a_at | 0.003375466  | 5.741722134 | 0.049131105  | 0.96184253  | 0.96184253  | -5.630699781 |
| 1455722_at   | -0.003686196 | 6.314649996 | -0.049087234 | 0.961876572 | 0.961876572 | -5.630701864 |
| 1442046_at   | 0.004503189  | 7.352190978 | 0.049067657  | 0.961891763 | 0.961891763 | -5.630702793 |
| 1428135_a_at | 0.00391129   | 6.661923533 | 0.049043817  | 0.961910261 | 0.961910261 | -5.630703924 |
| 1433926_at   | -0.003368314 | 10.05523591 | -0.049039548 | 0.961913575 | 0.961913575 | -5.630704127 |
| 1427389_at   | 0.004008935  | 4.304941291 | 0.049019737  | 0.961928947 | 0.961928947 | -5.630705066 |
| 1452076_at   | 0.003270529  | 7.754831967 | 0.049017048  | 0.961931034 | 0.961931034 | -5.630705193 |
| 1435463_s_at | -0.004222823 | 7.534777723 | -0.049003369 | 0.961941648 | 0.961941648 | -5.630705841 |
| 1424732_s_at | 0.00358422   | 6.988250301 | 0.048976716  | 0.961962329 | 0.961962329 | -5.630707104 |
| 1422316_at   | 0.003771741  | 3.630874781 | 0.048925204  | 0.962002301 | 0.962002301 | -5.630709542 |
| 1429680_at   | 0.003736945  | 8.922381462 | 0.04890329   | 0.962019306 | 0.962019306 | -5.630710579 |
| 1419141_at   | 0.004090353  | 3.759198008 | 0.048878208  | 0.962038768 | 0.962038768 | -5.630711764 |
| 1438560_x_at | 0.007131318  | 10.26340566 | 0.048822426  | 0.962082053 | 0.962082053 | -5.630714399 |
| 1426702_at   | -0.007525727 | 5.657507221 | -0.048819636 | 0.962084218 | 0.962084218 | -5.630714531 |
| 1454680_at   | 0.004430668  | 8.892352023 | 0.048804775  | 0.96209575  | 0.96209575  | -5.630715232 |
| 1433469_at   | 0.006208813  | 4.328707307 | 0.048790979  | 0.962106455 | 0.962106455 | -5.630715883 |
| 1458076_at   | 0.008208589  | 5.513676653 | 0.048736535  | 0.962148702 | 0.962148702 | -5.630718451 |
| 1430656_a_at | 0.002906332  | 9.65916543  | 0.048680635  | 0.962192079 | 0.962192079 | -5.630721083 |
| 1416991_at   | -0.00318751  | 8.162339596 | -0.048642283 | 0.962221839 | 0.962221839 | -5.630722888 |
| 1449861_at   | 0.003924326  | 6.625337425 | 0.048577616  | 0.962272019 | 0.962272019 | -5.630725927 |
| 1444465_at   | 0.007374336  | 4.854924981 | 0.048517411  | 0.962318737 | 0.962318737 | -5.630728754 |
| 1440296_at   | 0.003543229  | 3.65338521  | 0.04848809   | 0.96234149  | 0.96234149  | -5.630730129 |
| 1439498_at   | -0.00358409  | 5.887839952 | -0.04845173  | 0.962369704 | 0.962369704 | -5.630731833 |
| 1426408_at   | -0.003161105 | 9.389935861 | -0.048442746 | 0.962376675 | 0.962376675 | -5.630732254 |
| 1442820_at   | -0.003409392 | 3.538832118 | -0.048384638 | 0.962421766 | 0.962421766 | -5.630734974 |
| 1455648_at   | 0.006794183  | 7.309859891 | 0.048364418  | 0.962437457 | 0.962437457 | -5.63073592  |
| 1425804_at   | -0.00315548  | 3.632390025 | -0.048359937 | 0.962440934 | 0.962440934 | -5.630736129 |

|              |              |             |              |             |             |              |
|--------------|--------------|-------------|--------------|-------------|-------------|--------------|
| 1459420_at   | 0.004686084  | 6.969047173 | 0.048334255  | 0.962460863 | 0.962460863 | -5.63073733  |
| 1440349_at   | -0.003638808 | 7.749019923 | -0.048311024 | 0.96247889  | 0.96247889  | -5.630738415 |
| 1456740_x_at | -0.003575316 | 5.614654606 | -0.048289976 | 0.962495223 | 0.962495223 | -5.630739398 |
| 1458343_x_at | -0.005691313 | 7.091346313 | -0.048288833 | 0.96249611  | 0.96249611  | -5.630739452 |
| 1439079_a_at | -0.003358076 | 8.648071229 | -0.0481172   | 0.962629296 | 0.962629296 | -5.630747452 |
| 1435478_at   | 0.002842073  | 10.18977238 | 0.048112404  | 0.962633018 | 0.962633018 | -5.630747675 |
| 1452075_at   | -0.003536165 | 8.963690656 | -0.048085219 | 0.962654113 | 0.962654113 | -5.630748939 |
| 1459097_at   | 0.003549604  | 5.750661228 | 0.048049905  | 0.962681517 | 0.962681517 | -5.630750581 |
| 1430119_at   | 0.003860117  | 5.134273529 | 0.048033811  | 0.962694006 | 0.962694006 | -5.630751328 |
| 1447786_at   | -0.004137688 | 3.211910393 | -0.048005982 | 0.962715601 | 0.962715601 | -5.63075262  |
| 1424332_at   | -0.006678157 | 6.908938428 | -0.048005637 | 0.962715869 | 0.962715869 | -5.630752636 |
| 1450564_x_at | 0.004277397  | 4.772131263 | 0.047970499  | 0.962743136 | 0.962743136 | -5.630754267 |
| 1449945_at   | -0.004185339 | 7.522651576 | -0.047965964 | 0.962746656 | 0.962746656 | -5.630754477 |
| 1428619_at   | 0.003382174  | 10.27937094 | 0.047857694  | 0.962830673 | 0.962830673 | -5.630759493 |
| 1460620_at   | -0.005207062 | 7.321792289 | -0.047855155 | 0.962832644 | 0.962832644 | -5.630759611 |
| 1447020_at   | 0.007145146  | 5.849413201 | 0.047829056  | 0.962852897 | 0.962852897 | -5.630760818 |
| 1429447_at   | 0.004491698  | 8.721750144 | 0.047740545  | 0.962921582 | 0.962921582 | -5.630764908 |
| 1433603_at   | -0.003198364 | 9.83227763  | -0.047726039 | 0.962932839 | 0.962932839 | -5.630765577 |
| 1423453_at   | 0.003176774  | 8.772111197 | 0.047653477  | 0.962989148 | 0.962989148 | -5.630768923 |
| 1436756_x_at | -0.003510721 | 3.647379792 | -0.047647163 | 0.962994048 | 0.962994048 | -5.630769214 |
| 1452686_s_at | 0.003768399  | 8.412088411 | 0.047634582  | 0.963003811 | 0.963003811 | -5.630769794 |
| 1435259_s_at | -0.004923012 | 7.338488291 | -0.047586695 | 0.963040972 | 0.963040972 | -5.630771998 |
| 1435429_x_at | 0.003791212  | 11.49377362 | 0.047553505  | 0.963066728 | 0.963066728 | -5.630773525 |
| 1447121_at   | -0.004205947 | 4.160291995 | -0.047530213 | 0.963084804 | 0.963084804 | -5.630774596 |
| 1435932_at   | 0.003742135  | 6.304486659 | 0.047463922  | 0.963136246 | 0.963136246 | -5.63077764  |
| 1426635_at   | 0.003323059  | 7.52475607  | 0.04743693   | 0.963157193 | 0.963157193 | -5.630778879 |
| 1420187_at   | 0.003942101  | 3.520924226 | 0.047433997  | 0.963159469 | 0.963159469 | -5.630779013 |
| 1429000_at   | 0.004894322  | 7.214650364 | 0.047390616  | 0.963193134 | 0.963193134 | -5.630781002 |
| 1433425_at   | -0.004435772 | 6.390214202 | -0.047366034 | 0.96321221  | 0.96321221  | -5.630782128 |
| 1430735_at   | -0.003170694 | 4.391749921 | -0.047336875 | 0.963234838 | 0.963234838 | -5.630783464 |
| 1437196_x_at | 0.003100991  | 13.89196785 | 0.047329307  | 0.963240712 | 0.963240712 | -5.63078381  |
| 1449193_at   | -0.003713037 | 4.315223731 | -0.047278932 | 0.963279804 | 0.963279804 | -5.630786114 |
| 1436462_at   | -0.007906778 | 8.470396016 | -0.047218875 | 0.963326411 | 0.963326411 | -5.630788858 |
| 1420148_at   | 0.004708899  | 5.97762516  | 0.047193202  | 0.963346334 | 0.963346334 | -5.63079003  |
| 1421329_a_at | -0.006311659 | 5.742894314 | -0.047191451 | 0.963347692 | 0.963347692 | -5.63079011  |
| 1449275_at   | -0.003913848 | 7.659543017 | -0.047169198 | 0.963364961 | 0.963364961 | -5.630791125 |
| 1416476_a_at | -0.007551946 | 10.55965175 | -0.047155255 | 0.963375782 | 0.963375782 | -5.630791761 |
| 1450259_a_at | 0.00601366   | 4.743821007 | 0.047116385  | 0.963405946 | 0.963405946 | -5.630793533 |
| 1442810_x_at | 0.010964595  | 3.799288214 | 0.047105336  | 0.963414521 | 0.963414521 | -5.630794036 |
| 1437906_x_at | -0.003303805 | 3.246388654 | -0.047033872 | 0.96346998  | 0.96346998  | -5.630797289 |
| 1427316_s_at | 0.004592885  | 6.298085817 | 0.047024048  | 0.963477603 | 0.963477603 | -5.630797735 |
| 1437343_x_at | 0.006503074  | 9.732101977 | 0.047003871  | 0.963493261 | 0.963493261 | -5.630798653 |
| 1421661_at   | -0.003429144 | 3.913625044 | -0.046992534 | 0.963502059 | 0.963502059 | -5.630799168 |
| 1434520_at   | 0.004260606  | 7.788959255 | 0.046963098  | 0.963524903 | 0.963524903 | -5.630800505 |
| 1441046_at   | -0.003494922 | 6.546491469 | -0.046912808 | 0.963563931 | 0.963563931 | -5.630802787 |
| 1431596_at   | 0.003430539  | 3.931864253 | 0.046891364  | 0.963580572 | 0.963580572 | -5.63080376  |
| 1452366_at   | -0.007718284 | 7.5874691   | -0.04688128  | 0.963588397 | 0.963588397 | -5.630804217 |
| 1422091_at   | -0.00429223  | 5.996625432 | -0.046874739 | 0.963593474 | 0.963593474 | -5.630804514 |
| 1431676_x_at | 0.003267206  | 6.448972974 | 0.046867195  | 0.963599329 | 0.963599329 | -5.630804856 |
| 1429859_a_at | 0.003272115  | 9.502411634 | 0.046840863  | 0.963619763 | 0.963619763 | -5.630806049 |
| 1454492_at   | -0.004003419 | 5.412506083 | -0.046815831 | 0.963639189 | 0.963639189 | -5.630807182 |
| 1438836_at   | -0.004971727 | 5.561828166 | -0.046811977 | 0.96364218  | 0.96364218  | -5.630807357 |
| 1438662_at   | 0.004225627  | 3.915261371 | 0.04679202   | 0.963657668 | 0.963657668 | -5.63080826  |



|              |              |             |              |             |             |              |
|--------------|--------------|-------------|--------------|-------------|-------------|--------------|
| 1450016_at   | -0.003806182 | 8.450475944 | -0.046747344 | 0.963692338 | 0.963692338 | -5.63081028  |
| 1455141_at   | -0.004369632 | 9.577302139 | -0.046681651 | 0.96374332  | 0.96374332  | -5.630813248 |
| 1431112_at   | -0.004442166 | 6.554771723 | -0.046662667 | 0.963758053 | 0.963758053 | -5.630814104 |
| 1443418_at   | 0.003710371  | 4.699554261 | 0.046655736  | 0.963763432 | 0.963763432 | -5.630814417 |
| 1447824_x_at | -0.003331687 | 9.117660378 | -0.046641261 | 0.963774665 | 0.963774665 | -5.63081507  |
| 1423055_at   | 0.003106568  | 9.18304597  | 0.046630792  | 0.96378279  | 0.96378279  | -5.630815542 |
| 1423837_at   | -0.003233019 | 8.884564465 | -0.046626676 | 0.963785984 | 0.963785984 | -5.630815728 |
| 1454121_x_at | -0.003478502 | 3.303175546 | -0.046614875 | 0.963795142 | 0.963795142 | -5.63081626  |
| 1459461_at   | 0.003292168  | 6.819238361 | 0.04659054   | 0.963814027 | 0.963814027 | -5.630817356 |
| 1455011_at   | 0.003455502  | 8.031849017 | 0.046529656  | 0.963861277 | 0.963861277 | -5.630820097 |
| 1429245_at   | 0.006878278  | 6.017495831 | 0.04650055   | 0.963883865 | 0.963883865 | -5.630821407 |
| 1450431_a_at | -0.003287156 | 12.53190506 | -0.046493646 | 0.963889223 | 0.963889223 | -5.630821717 |
| 1425409_at   | -0.004724737 | 3.874854789 | -0.046447408 | 0.963925107 | 0.963925107 | -5.630823795 |
| 1428476_a_at | -0.003933032 | 7.098236868 | -0.046409694 | 0.963954376 | 0.963954376 | -5.630825488 |
| 1443014_at   | 0.003139721  | 3.247318253 | 0.046400388  | 0.963961597 | 0.963961597 | -5.630825905 |
| 1447917_x_at | -0.003127247 | 9.550394427 | -0.046359011 | 0.963993709 | 0.963993709 | -5.630827761 |
| 1457932_at   | -0.004456809 | 3.768657148 | -0.046315158 | 0.964027742 | 0.964027742 | -5.630829726 |
| 1438385_s_at | 0.004846818  | 7.245727745 | 0.046292626  | 0.964045228 | 0.964045228 | -5.630830735 |
| 1422235_at   | 0.004258482  | 3.618408958 | 0.04625256   | 0.964076322 | 0.964076322 | -5.630832528 |
| 1433519_at   | 0.003704915  | 11.95236816 | 0.046208321  | 0.964110655 | 0.964110655 | -5.630834505 |
| 1434169_at   | -0.003675007 | 7.578033628 | -0.046202172 | 0.964115427 | 0.964115427 | -5.63083478  |
| 1437911_at   | 0.004974031  | 4.491045802 | 0.04616769   | 0.964142188 | 0.964142188 | -5.63083632  |
| 1416637_at   | 0.005352548  | 8.310189494 | 0.046113712  | 0.964184079 | 0.964184079 | -5.630838728 |
| 1459809_x_at | -0.003663233 | 3.1102179   | -0.046110565 | 0.964186521 | 0.964186521 | -5.630838869 |
| 1420804_s_at | 0.004558394  | 4.195790438 | 0.046051106  | 0.964232666 | 0.964232666 | -5.630841518 |
| 1427656_at   | 0.004614418  | 4.894572316 | 0.046024985  | 0.964252938 | 0.964252938 | -5.630842681 |
| 1418958_at   | 0.00422825   | 5.192119565 | 0.04598954   | 0.964280446 | 0.964280446 | -5.630844258 |
| 1458880_at   | 0.004603178  | 7.067215572 | 0.045934377  | 0.964323257 | 0.964323257 | -5.630846709 |
| 1422011_s_at | 0.004894614  | 3.276378041 | 0.045882554  | 0.964363477 | 0.964363477 | -5.63084901  |
| 1434646_s_at | -0.00327     | 11.00897303 | -0.045881931 | 0.96436396  | 0.96436396  | -5.630849038 |
| 1418715_at   | 0.003776613  | 7.630848708 | 0.045866832  | 0.964375678 | 0.964375678 | -5.630849707 |
| 1445424_at   | 0.003392969  | 4.136504057 | 0.045866793  | 0.964375708 | 0.964375708 | -5.630849709 |
| 1419231_s_at | 0.003523744  | 3.704749406 | 0.045812256  | 0.964418034 | 0.964418034 | -5.630852126 |
| 1450281_a_at | 0.003278515  | 3.135951346 | 0.045797702  | 0.964429329 | 0.964429329 | -5.630852771 |
| 1457655_x_at | -0.003631511 | 3.243401869 | -0.045780474 | 0.964442699 | 0.964442699 | -5.630853534 |
| 1425971_at   | 0.003424868  | 4.581991304 | 0.045731154  | 0.964480977 | 0.964480977 | -5.630855716 |
| 1436038_a_at | 0.002746973  | 10.29698857 | 0.045701478  | 0.964504008 | 0.964504008 | -5.630857028 |
| 1446960_at   | 0.003680192  | 3.892372106 | 0.045693602  | 0.96451012  | 0.96451012  | -5.630857376 |
| 1423497_at   | 0.005908811  | 4.66251578  | 0.045689868  | 0.964513018 | 0.964513018 | -5.630857541 |
| 1431287_at   | -0.003199987 | 6.064984204 | -0.045677288 | 0.964522782 | 0.964522782 | -5.630858097 |
| 1445485_at   | 0.004019168  | 3.715945674 | 0.045655076  | 0.964540021 | 0.964540021 | -5.630859078 |
| 1454358_at   | -0.004391271 | 4.669105225 | -0.045627637 | 0.964561316 | 0.964561316 | -5.630860289 |
| 1446816_at   | 0.004686678  | 3.942238171 | 0.045625219  | 0.964563192 | 0.964563192 | -5.630860395 |
| 1455341_at   | -0.003557881 | 8.949415122 | -0.045622838 | 0.964565041 | 0.964565041 | -5.6308605   |
| 1454956_at   | 0.00413057   | 8.653629033 | 0.045612838  | 0.964572801 | 0.964572801 | -5.630860941 |
| 1425385_a_at | 0.003545527  | 4.178348887 | 0.045441017  | 0.964706152 | 0.964706152 | -5.630868506 |
| 1421880_at   | 0.003157236  | 7.619241839 | 0.045439669  | 0.964707197 | 0.964707197 | -5.630868565 |
| 1441165_s_at | 0.006083757  | 8.133915479 | 0.045435808  | 0.964710194 | 0.964710194 | -5.630868734 |
| 1418033_s_at | 0.003351694  | 6.857926321 | 0.0454266    | 0.96471734  | 0.96471734  | -5.630869139 |
| 1433729_x_at | -0.003889349 | 9.321149921 | -0.045423191 | 0.964719987 | 0.964719987 | -5.630869289 |
| 1450632_at   | -0.005079139 | 10.22317747 | -0.045344351 | 0.964781175 | 0.964781175 | -5.630872749 |
| 1457971_at   | 0.003746661  | 4.211834546 | 0.04528441   | 0.964827695 | 0.964827695 | -5.630875375 |
| 1452087_at   | 0.003916754  | 4.592167791 | 0.045268464  | 0.964840072 | 0.964840072 | -5.630876073 |

|              |              |             |              |             |             |              |
|--------------|--------------|-------------|--------------|-------------|-------------|--------------|
| 1431820_at   | -0.004907581 | 5.219145852 | -0.045253679 | 0.964851546 | 0.964851546 | -5.63087672  |
| 1442316_x_at | -0.027608975 | 6.01596988  | -0.045248161 | 0.964855829 | 0.964855829 | -5.630876962 |
| 1441340_at   | -0.003643368 | 6.210805704 | -0.045245727 | 0.964857718 | 0.964857718 | -5.630877068 |
| 1427131_s_at | 0.005302913  | 10.15151353 | 0.045239468  | 0.964862575 | 0.964862575 | -5.630877342 |
| 1453608_at   | 0.004309825  | 7.267257217 | 0.045206019  | 0.964888535 | 0.964888535 | -5.630878805 |
| 1435481_at   | 0.003952399  | 6.929307011 | 0.045186952  | 0.964903334 | 0.964903334 | -5.630879638 |
| 1452954_at   | -0.00387519  | 10.80082995 | -0.04517529  | 0.964912385 | 0.964912385 | -5.630880148 |
| 1426620_at   | -0.00413474  | 6.291988792 | -0.045148881 | 0.964932881 | 0.964932881 | -5.630881301 |
| 1439089_at   | 0.003592094  | 8.121661935 | 0.04510257   | 0.964968824 | 0.964968824 | -5.630883322 |
| 1431804_a_at | 0.004444622  | 9.027549231 | 0.045000058  | 0.965048386 | 0.965048386 | -5.630887788 |
| 1447082_at   | -0.003209048 | 3.901051046 | -0.044953373 | 0.965084619 | 0.965084619 | -5.630889818 |
| 1442467_at   | -0.00581589  | 4.325527565 | -0.044939957 | 0.965095032 | 0.965095032 | -5.630890401 |
| 1428291_at   | 0.003196154  | 10.02585468 | 0.044921809  | 0.965109117 | 0.965109117 | -5.63089119  |
| 1415732_at   | 0.003949357  | 8.790949267 | 0.044854304  | 0.965161509 | 0.965161509 | -5.63089412  |
| 1424641_a_at | 0.006783074  | 8.777691477 | 0.044829063  | 0.965181099 | 0.965181099 | -5.630895214 |
| 1450074_at   | -0.003555993 | 7.266900937 | -0.044748162 | 0.965243889 | 0.965243889 | -5.630898718 |
| 1448430_a_at | -0.002844966 | 13.11861786 | -0.04473982  | 0.965250363 | 0.965250363 | -5.630899079 |
| 1451012_a_at | -0.005589707 | 9.728906211 | -0.044718677 | 0.965266773 | 0.965266773 | -5.630899993 |
| 1420849_at   | -0.007975646 | 6.053716359 | -0.044702661 | 0.965279203 | 0.965279203 | -5.630900686 |
| 1447285_at   | -0.003248622 | 3.08729176  | -0.044658606 | 0.965313396 | 0.965313396 | -5.630902589 |
| 1433664_at   | -0.003728528 | 8.221148114 | -0.044579633 | 0.96537469  | 0.96537469  | -5.630905997 |
| 1452773_at   | -0.005059348 | 10.27545505 | -0.044562932 | 0.965387652 | 0.965387652 | -5.630906716 |
| 1426916_at   | 0.003126985  | 7.902561632 | 0.044545716  | 0.965401014 | 0.965401014 | -5.630907458 |
| 1421875_a_at | -0.003275252 | 8.685425435 | -0.044528465 | 0.965414403 | 0.965414403 | -5.630908201 |
| 1427712_at   | 0.00446337   | 4.016901538 | 0.044492086  | 0.965442639 | 0.965442639 | -5.630909767 |
| 1448215_a_at | 0.002755875  | 9.004128468 | 0.044467598  | 0.965461645 | 0.965461645 | -5.63091082  |
| 1454900_s_at | 0.003847253  | 10.76140561 | 0.044439695  | 0.965483302 | 0.965483302 | -5.63091202  |
| 1435421_at   | 0.003415847  | 7.461883977 | 0.044419162  | 0.965499238 | 0.965499238 | -5.630912902 |
| 1423056_at   | 0.004010664  | 4.449236136 | 0.044417968  | 0.965500165 | 0.965500165 | -5.630912953 |
| 1445766_at   | -0.002782823 | 3.834092511 | -0.044372017 | 0.96553583  | 0.96553583  | -5.630914926 |
| 1448696_at   | 0.00443853   | 9.187378463 | 0.044363853  | 0.965542166 | 0.965542166 | -5.630915276 |
| 1417108_at   | 0.003803215  | 7.847256966 | 0.044362417  | 0.965543281 | 0.965543281 | -5.630915338 |
| 1455485_x_at | 0.002628809  | 13.6129924  | 0.044317714  | 0.965577977 | 0.965577977 | -5.630917254 |
| 1430250_at   | -0.004239031 | 5.802970533 | -0.044295375 | 0.965595315 | 0.965595315 | -5.630918211 |
| 1421478_a_at | 0.004449734  | 6.888586644 | 0.044221521  | 0.965652637 | 0.965652637 | -5.630921372 |
| 1441096_at   | 0.003488235  | 4.926047385 | 0.044201058  | 0.965668519 | 0.965668519 | -5.630922247 |
| 1429883_at   | 0.003417526  | 8.779618424 | 0.044185497  | 0.965680597 | 0.965680597 | -5.630922912 |
| 1452982_at   | -0.006253885 | 9.675169972 | -0.04417565  | 0.965688239 | 0.965688239 | -5.630923333 |
| 1448513_a_at | -0.003805547 | 11.96918082 | -0.044114551 | 0.965735662 | 0.965735662 | -5.630925941 |
| 1432785_at   | 0.004310425  | 4.626931707 | 0.044076342  | 0.965765319 | 0.965765319 | -5.63092757  |
| 1436821_at   | 0.007094052  | 5.619478094 | 0.044068544  | 0.965771371 | 0.965771371 | -5.630927902 |
| 1419404_s_at | -0.006206295 | 5.948177735 | -0.043969321 | 0.965848383 | 0.965848383 | -5.630932126 |
| 1440971_x_at | -0.004652509 | 7.408026961 | -0.043933168 | 0.965876444 | 0.965876444 | -5.630933662 |
| 1427407_s_at | 0.004501764  | 9.298297003 | 0.043922144  | 0.965885001 | 0.965885001 | -5.630934131 |
| 1446301_at   | -0.002670601 | 7.327143349 | -0.043889974 | 0.96590997  | 0.96590997  | -5.630935497 |
| 1427211_at   | -0.003285762 | 4.615968116 | -0.043767715 | 0.966004863 | 0.966004863 | -5.630940678 |
| 1436884_x_at | 0.003386764  | 11.4503186  | 0.043710233  | 0.966049479 | 0.966049479 | -5.630943109 |
| 1436266_x_at | -0.005015731 | 9.665862913 | -0.043707125 | 0.966051891 | 0.966051891 | -5.630943241 |
| 1425153_at   | 0.003116089  | 3.624185456 | 0.043667425  | 0.966082705 | 0.966082705 | -5.630944918 |
| 1450001_a_at | -0.00326984  | 4.28277447  | -0.043650052 | 0.966096189 | 0.966096189 | -5.630945651 |
| 1419674_a_at | 0.003691657  | 4.691644107 | 0.043593399  | 0.966140162 | 0.966140162 | -5.630948041 |
| 1430130_at   | 0.003873189  | 6.64740948  | 0.043585     | 0.966146682 | 0.966146682 | -5.630948395 |
| 1418806_at   | 0.003194219  | 4.537370158 | 0.043563947  | 0.966163023 | 0.966163023 | -5.630949282 |

|              |              |             |              |             |             |              |
|--------------|--------------|-------------|--------------|-------------|-------------|--------------|
| 1426661_at   | -0.002638132 | 13.47100151 | -0.043443129 | 0.966256799 | 0.966256799 | -5.630954365 |
| 1447724_x_at | 0.003409738  | 8.534930108 | 0.043436061  | 0.966262285 | 0.966262285 | -5.630954662 |
| 1416728_at   | 0.003215657  | 10.72697113 | 0.043432692  | 0.9662649   | 0.9662649   | -5.630954803 |
| 1447728_x_at | -0.003384113 | 7.419583815 | -0.043404767 | 0.966286575 | 0.966286575 | -5.630955976 |
| 1438152_at   | -0.003636798 | 7.102694809 | -0.043368147 | 0.966314998 | 0.966314998 | -5.630957512 |
| 1419584_at   | 0.007831037  | 9.940012943 | 0.043359339  | 0.966321835 | 0.966321835 | -5.630957881 |
| 1448827_s_at | 0.004098369  | 3.585453321 | 0.043356841  | 0.966323774 | 0.966323774 | -5.630957986 |
| 1453847_at   | 0.003877522  | 3.797317474 | 0.043334513  | 0.966341105 | 0.966341105 | -5.630958922 |
| 1422806_x_at | 0.005008573  | 6.915160626 | 0.043291085  | 0.966374813 | 0.966374813 | -5.630960741 |
| 1452542_x_at | 0.006457902  | 6.866250014 | 0.043267742  | 0.966392931 | 0.966392931 | -5.630961718 |
| 1427714_at   | 0.003868355  | 3.663023924 | 0.043228179  | 0.966423639 | 0.966423639 | -5.630963372 |
| 1432529_at   | 0.004853008  | 5.302858911 | 0.043218964  | 0.966430792 | 0.966430792 | -5.630963758 |
| 1433405_at   | 0.004979304  | 4.056861537 | 0.043215162  | 0.966433743 | 0.966433743 | -5.630963917 |
| 1451396_at   | -0.003827429 | 6.816081352 | -0.043181074 | 0.966460202 | 0.966460202 | -5.63096534  |
| 1428668_at   | 0.002830627  | 8.98806436  | 0.043179849  | 0.966461153 | 0.966461153 | -5.630965392 |
| 1446216_at   | 0.003707221  | 3.65452524  | 0.043125194  | 0.966503576 | 0.966503576 | -5.630967672 |
| 1430254_at   | -0.003766164 | 4.415520112 | -0.04310439  | 0.966519723 | 0.966519723 | -5.63096854  |
| 1455315_at   | 0.002752627  | 8.138308446 | 0.043084143  | 0.966535439 | 0.966535439 | -5.630969383 |
| 1417948_s_at | -0.003630677 | 9.593724567 | -0.043067574 | 0.9665483   | 0.9665483   | -5.630970074 |
| 1436034_at   | 0.003465483  | 8.861353038 | 0.043064851  | 0.966550413 | 0.966550413 | -5.630970187 |
| 1436480_at   | -0.004019437 | 4.936327927 | -0.043059013 | 0.966554945 | 0.966554945 | -5.63097043  |
| 1435734_x_at | 0.004674379  | 8.034433012 | 0.043032341  | 0.966575648 | 0.966575648 | -5.63097154  |
| 1452959_a_at | 0.004578913  | 6.725170409 | 0.04297457   | 0.966620489 | 0.966620489 | -5.630973943 |
| 1422645_at   | 0.004987007  | 5.786315766 | 0.042964549  | 0.966628267 | 0.966628267 | -5.630974359 |
| 1458468_at   | -0.003230862 | 3.677499632 | -0.042937008 | 0.966649645 | 0.966649645 | -5.630975503 |
| 1422044_at   | -0.005170946 | 5.280443702 | -0.042898842 | 0.966679269 | 0.966679269 | -5.630977087 |
| 1460353_at   | 0.003079271  | 8.014569055 | 0.042837712  | 0.966726719 | 0.966726719 | -5.630979621 |
| 1442014_at   | 0.003128068  | 7.447039223 | 0.042824877  | 0.966736681 | 0.966736681 | -5.630980153 |
| 1457716_at   | 0.003709247  | 7.317920647 | 0.042821745  | 0.966739112 | 0.966739112 | -5.630980282 |
| 1448424_at   | 0.005861849  | 9.454783762 | 0.042744075  | 0.9667994   | 0.9667994   | -5.630983496 |
| 1416706_at   | -0.003332737 | 8.958546436 | -0.042721852 | 0.96681665  | 0.96681665  | -5.630984414 |
| 1426414_a_at | 0.00285034   | 10.07015495 | 0.042715376  | 0.966821677 | 0.966821677 | -5.630984681 |
| 1436627_at   | 0.003829278  | 8.281377678 | 0.042692512  | 0.966839423 | 0.966839423 | -5.630985626 |
| 1426992_at   | 0.003377283  | 9.221610904 | 0.042688581  | 0.966842475 | 0.966842475 | -5.630985788 |
| 1435889_at   | -0.003753483 | 5.333881911 | -0.042592172 | 0.966917309 | 0.966917309 | -5.630989763 |
| 1443179_at   | -0.003993124 | 3.58898701  | -0.042587532 | 0.96692091  | 0.96692091  | -5.630989954 |
| 1438280_at   | 0.003566078  | 3.620281424 | 0.042585567  | 0.966922435 | 0.966922435 | -5.630990035 |
| 1436911_at   | -0.003344528 | 7.710318472 | -0.042553648 | 0.966947211 | 0.966947211 | -5.630991349 |
| 1439421_x_at | -0.003458716 | 9.98224388  | -0.042527923 | 0.96696718  | 0.96696718  | -5.630992407 |
| 1457484_at   | -0.00697102  | 6.592154203 | -0.042526643 | 0.966968173 | 0.966968173 | -5.63099246  |
| 1448286_at   | 0.003191148  | 10.15157149 | 0.042511381  | 0.96698002  | 0.96698002  | -5.630993088 |
| 1434679_at   | 0.003941073  | 5.160883665 | 0.042504256  | 0.96698555  | 0.96698555  | -5.63099338  |
| 1416546_a_at | 0.002798708  | 13.21469175 | 0.04248165   | 0.967003097 | 0.967003097 | -5.630994309 |
| 1459941_at   | 0.003866086  | 3.649262015 | 0.042475379  | 0.967007965 | 0.967007965 | -5.630994567 |
| 1440073_at   | -0.005614254 | 4.73348691  | -0.042414104 | 0.967055527 | 0.967055527 | -5.630997082 |
| 1436061_at   | 0.006844006  | 4.356939226 | 0.042387616  | 0.967076088 | 0.967076088 | -5.630998168 |
| 1447685_x_at | 0.003162616  | 7.768213696 | 0.042385921  | 0.967077404 | 0.967077404 | -5.630998237 |
| 1416402_at   | -0.005726365 | 7.732456132 | -0.042375136 | 0.967085775 | 0.967085775 | -5.630998679 |
| 1447588_x_at | -0.00327353  | 3.685801395 | -0.042362506 | 0.967095579 | 0.967095579 | -5.630999197 |
| 1417196_s_at | 0.003122972  | 8.285408384 | 0.042344366  | 0.967109659 | 0.967109659 | -5.63099994  |
| 1424184_at   | -0.003217255 | 9.462781604 | -0.042307197 | 0.967138511 | 0.967138511 | -5.631001461 |
| 1434884_at   | 0.004030906  | 8.131471207 | 0.042305035  | 0.967140189 | 0.967140189 | -5.63100155  |
| 1422200_at   | 0.002838682  | 5.198349688 | 0.042298345  | 0.967145382 | 0.967145382 | -5.631001823 |

|              |              |             |              |             |             |              |
|--------------|--------------|-------------|--------------|-------------|-------------|--------------|
| 1429856_at   | 0.00544774   | 5.045673826 | 0.042267169  | 0.967169582 | 0.967169582 | -5.631003098 |
| 1451850_at   | 0.003789709  | 3.821752441 | 0.042250266  | 0.967182702 | 0.967182702 | -5.631003789 |
| 1442464_at   | 0.005407608  | 6.063631005 | 0.042246026  | 0.967185993 | 0.967185993 | -5.631003962 |
| 1422040_at   | -0.004219031 | 4.799798988 | -0.04218436  | 0.96723386  | 0.96723386  | -5.631006479 |
| 1438328_at   | -0.003007664 | 7.138007362 | -0.042184327 | 0.967233886 | 0.967233886 | -5.631006481 |
| 1430803_at   | 0.004066868  | 3.182107636 | 0.042141725  | 0.967266955 | 0.967266955 | -5.631008218 |
| 1454556_at   | 0.003402101  | 3.818671528 | 0.04213532   | 0.967271926 | 0.967271926 | -5.631008479 |
| 1460028_at   | -0.003052077 | 5.686127697 | -0.042129319 | 0.967276585 | 0.967276585 | -5.631008723 |
| 1459037_at   | 0.00296378   | 3.516567286 | 0.042103415  | 0.967296692 | 0.967296692 | -5.631009778 |
| 1429817_at   | -0.003941303 | 5.525967212 | -0.042102926 | 0.967297071 | 0.967297071 | -5.631009798 |
| 1455756_at   | 0.004230006  | 7.470706191 | 0.042089468  | 0.967307518 | 0.967307518 | -5.631010346 |
| 1432509_at   | 0.005530496  | 6.65091424  | 0.042052777  | 0.967335999 | 0.967335999 | -5.631011839 |
| 1426412_at   | 0.002757571  | 3.639427999 | 0.042044165  | 0.967342684 | 0.967342684 | -5.631012189 |
| 1452701_x_at | -0.002533641 | 13.15205175 | -0.042006022 | 0.967372291 | 0.967372291 | -5.631013739 |
| 1437982_x_at | 0.010901836  | 6.597590376 | 0.041940436  | 0.967423202 | 0.967423202 | -5.631016401 |
| 1449478_at   | -0.002752696 | 5.670162819 | -0.041918124 | 0.967440521 | 0.967440521 | -5.631017306 |
| 1449215_at   | 0.005060109  | 5.792762182 | 0.041848667  | 0.967494436 | 0.967494436 | -5.631020119 |
| 1447391_at   | -0.005555297 | 5.149850131 | -0.041845758 | 0.967496694 | 0.967496694 | -5.631020236 |
| 1416511_a_at | -0.003883746 | 7.541060893 | -0.041844128 | 0.96749796  | 0.96749796  | -5.631020302 |
| 1433244_at   | -0.004551166 | 3.911337062 | -0.041833716 | 0.967506042 | 0.967506042 | -5.631020724 |
| 1443576_at   | 0.003381549  | 6.004959971 | 0.041810267  | 0.967524244 | 0.967524244 | -5.631021672 |
| 1445910_at   | -0.003971871 | 3.708642301 | -0.041789548 | 0.967540327 | 0.967540327 | -5.631022509 |
| 1432244_at   | -0.004727347 | 4.238251175 | -0.04178171  | 0.967546411 | 0.967546411 | -5.631022826 |
| 1429015_at   | 0.003566972  | 6.025509476 | 0.041682556  | 0.967623378 | 0.967623378 | -5.631026828 |
| 1423407_a_at | 0.003600961  | 10.23029772 | 0.041676467  | 0.967628105 | 0.967628105 | -5.631027073 |
| 1445386_at   | -0.0029359   | 3.698381588 | -0.041633372 | 0.967661558 | 0.967661558 | -5.631028809 |
| 1427309_at   | 0.003644136  | 6.905702271 | 0.041452258  | 0.967802147 | 0.967802147 | -5.631036085 |
| 1438747_at   | 0.007152939  | 6.407087605 | 0.041421861  | 0.967825743 | 0.967825743 | -5.631037303 |
| 1427695_a_at | 0.003657447  | 7.185082275 | 0.041399627  | 0.967843002 | 0.967843002 | -5.631038193 |
| 1426282_at   | 0.005794671  | 6.027219094 | 0.041393273  | 0.967847935 | 0.967847935 | -5.631038448 |
| 1432210_at   | 0.002775962  | 5.993652232 | 0.041391354  | 0.967849424 | 0.967849424 | -5.631038524 |
| 1440674_at   | 0.004022586  | 3.682523756 | 0.041323947  | 0.967901749 | 0.967901749 | -5.63104122  |
| 1420432_at   | 0.003253466  | 5.512541302 | 0.041291693  | 0.967926787 | 0.967926787 | -5.631042509 |
| 1418785_at   | 0.004059212  | 6.714559773 | 0.04125346   | 0.967956465 | 0.967956465 | -5.631044035 |
| 1448131_at   | -0.004259805 | 8.020701787 | -0.041252198 | 0.967957445 | 0.967957445 | -5.631044085 |
| 1419847_at   | 0.003385209  | 3.800399909 | 0.041251326  | 0.967958122 | 0.967958122 | -5.63104412  |
| 1432045_at   | -0.003688343 | 5.15364416  | -0.041244555 | 0.967963378 | 0.967963378 | -5.63104439  |
| 1431557_at   | -0.003518443 | 3.838088045 | -0.041238127 | 0.967968368 | 0.967968368 | -5.631044646 |
| 1428342_at   | -0.002830157 | 8.828227489 | -0.041235797 | 0.967970177 | 0.967970177 | -5.631044739 |
| 1452995_at   | 0.003324711  | 6.556149469 | 0.041202018  | 0.967996398 | 0.967996398 | -5.631046085 |
| 1456999_at   | -0.003674352 | 6.220894874 | -0.041151626 | 0.968035516 | 0.968035516 | -5.631048092 |
| 1445084_at   | -0.002568823 | 3.492245588 | -0.041148275 | 0.968038117 | 0.968038117 | -5.631048225 |
| 1429421_at   | -0.002802657 | 7.047029862 | -0.041143922 | 0.968041496 | 0.968041496 | -5.631048399 |
| 1437521_s_at | -0.004511686 | 11.16746149 | -0.041127416 | 0.968054309 | 0.968054309 | -5.631049055 |
| 1437338_x_at | 0.002789533  | 7.93208687  | 0.041100252  | 0.968075396 | 0.968075396 | -5.631050135 |
| 1433866_x_at | -0.00600483  | 11.01253157 | -0.041090795 | 0.968082737 | 0.968082737 | -5.631050511 |
| 1429023_at   | -0.003922557 | 3.861763253 | -0.041032253 | 0.968128181 | 0.968128181 | -5.631052836 |
| 1415919_at   | -0.004440195 | 8.032012374 | -0.041031027 | 0.968129132 | 0.968129132 | -5.631052884 |
| 1432672_at   | -0.003561465 | 4.268381914 | -0.041029907 | 0.968130002 | 0.968130002 | -5.631052929 |
| 1458437_at   | 0.004530887  | 4.4709927   | 0.041026494  | 0.968132651 | 0.968132651 | -5.631053064 |
| 1417009_at   | -0.006730457 | 6.805587072 | -0.041003162 | 0.968150763 | 0.968150763 | -5.631053989 |
| 1426845_at   | -0.002852391 | 7.746067653 | -0.04087884  | 0.968247271 | 0.968247271 | -5.631058911 |
| 1428091_at   | -0.004308769 | 9.573673673 | -0.040867502 | 0.968256072 | 0.968256072 | -5.63105936  |

|              |              |             |              |             |             |              |
|--------------|--------------|-------------|--------------|-------------|-------------|--------------|
| 1417682_a_at | -0.003068862 | 5.403298933 | -0.040861922 | 0.968260404 | 0.968260404 | -5.63105958  |
| 1455185_s_at | -0.004394465 | 6.421716786 | -0.04078173  | 0.968322655 | 0.968322655 | -5.631062746 |
| 1431453_at   | 0.002823286  | 4.003891498 | 0.040692407  | 0.968391994 | 0.968391994 | -5.631066264 |
| 1451556_a_at | -0.0030904   | 7.9899657   | -0.040685699 | 0.968397202 | 0.968397202 | -5.631066528 |
| 1455509_at   | -0.005677805 | 5.549639689 | -0.040679381 | 0.968402106 | 0.968402106 | -5.631066777 |
| 1424543_at   | 0.003962577  | 5.631163277 | 0.040672312  | 0.968407594 | 0.968407594 | -5.631067055 |
| 1434427_a_at | 0.006141128  | 7.583217737 | 0.040614406  | 0.968452545 | 0.968452545 | -5.631069331 |
| 1450657_at   | 0.002810957  | 8.178459112 | 0.040608639  | 0.968457022 | 0.968457022 | -5.631069557 |
| 1439468_at   | 0.003397732  | 5.959749781 | 0.040603245  | 0.96846121  | 0.96846121  | -5.631069769 |
| 1433418_at   | -0.004041715 | 4.149430385 | -0.040588031 | 0.968473019 | 0.968473019 | -5.631070366 |
| 1429824_at   | -0.003162984 | 3.399094623 | -0.040554211 | 0.968499274 | 0.968499274 | -5.631071693 |
| 1437262_x_at | -0.011644198 | 4.824060867 | -0.040485283 | 0.968552781 | 0.968552781 | -5.631074394 |
| 1453874_at   | -0.003669527 | 3.620457154 | -0.040483966 | 0.968553803 | 0.968553803 | -5.631074446 |
| 1422206_at   | -0.005532624 | 4.542045844 | -0.040405861 | 0.968614436 | 0.968614436 | -5.631077501 |
| 1439225_at   | 0.003913943  | 6.244393042 | 0.04040577   | 0.968614506 | 0.968614506 | -5.631077504 |
| 1436554_at   | -0.002613699 | 7.957382084 | -0.040397154 | 0.968621195 | 0.968621195 | -5.631077841 |
| 1426778_at   | 0.003540175  | 10.15076945 | 0.040378277  | 0.968635849 | 0.968635849 | -5.631078578 |
| 1434010_at   | -0.002466476 | 8.239268164 | -0.04037047  | 0.96864191  | 0.96864191  | -5.631078883 |
| 1420606_at   | -0.003102588 | 6.558428842 | -0.040344555 | 0.968662027 | 0.968662027 | -5.631079894 |
| 1419857_at   | -0.002982836 | 3.43061017  | -0.040341195 | 0.968664636 | 0.968664636 | -5.631080025 |
| 1454661_at   | 0.002420207  | 12.75320845 | 0.040326889  | 0.968675741 | 0.968675741 | -5.631080583 |
| 1450410_a_at | 0.004629255  | 7.82119157  | 0.040311233  | 0.968687895 | 0.968687895 | -5.631081194 |
| 1418152_at   | -0.004047383 | 9.43325937  | -0.04022434  | 0.968755349 | 0.968755349 | -5.631084577 |
| 1433082_at   | 0.004306322  | 3.989213127 | 0.040199518  | 0.968774618 | 0.968774618 | -5.631085543 |
| 1433619_at   | -0.003663059 | 7.192188415 | -0.040198884 | 0.968775111 | 0.968775111 | -5.631085567 |
| 1419540_at   | -0.003257846 | 3.644396613 | -0.040165727 | 0.96880085  | 0.96880085  | -5.631086856 |
| 1445986_at   | -0.002856043 | 3.864294033 | -0.040164896 | 0.968801496 | 0.968801496 | -5.631086888 |
| 1452993_at   | 0.00487404   | 3.828839712 | 0.040142784  | 0.968818661 | 0.968818661 | -5.631087747 |
| 1458580_at   | -0.004120274 | 5.034513698 | -0.040077579 | 0.96886928  | 0.96886928  | -5.631090276 |
| 1450972_at   | 0.003101079  | 7.579317177 | 0.040058086  | 0.968884412 | 0.968884412 | -5.631091031 |
| 1449298_a_at | 0.004448782  | 6.571359186 | 0.040045453  | 0.96889422  | 0.96889422  | -5.63109152  |
| 1421337_at   | -0.003069346 | 5.137042904 | -0.040040733 | 0.968897883 | 0.968897883 | -5.631091703 |
| 1432587_at   | 0.003081038  | 3.258477    | 0.039952679  | 0.96896624  | 0.96896624  | -5.631095109 |
| 1453341_a_at | 0.003272354  | 3.555936975 | 0.039930355  | 0.968983571 | 0.968983571 | -5.631095971 |
| 1458665_at   | -0.003439504 | 6.110499468 | -0.039910308 | 0.968999133 | 0.968999133 | -5.631096745 |
| 1421255_a_at | 0.004230051  | 3.833912343 | 0.039859332  | 0.969038706 | 0.969038706 | -5.631098711 |
| 1451326_at   | 0.002522596  | 7.444566378 | 0.039809079  | 0.969077718 | 0.969077718 | -5.631100647 |
| 1433606_at   | -0.002877712 | 9.281902405 | -0.039787994 | 0.969094087 | 0.969094087 | -5.631101458 |
| 1447584_s_at | 0.005639134  | 5.845329096 | 0.039778036  | 0.969101817 | 0.969101817 | -5.631101842 |
| 1416315_at   | 0.002678517  | 8.321825297 | 0.039773648  | 0.969105224 | 0.969105224 | -5.63110201  |
| 1426970_a_at | -0.002962688 | 7.171338133 | -0.039772068 | 0.96910645  | 0.96910645  | -5.631102071 |
| 1417872_at   | -0.003832495 | 9.805708033 | -0.039700506 | 0.969162005 | 0.969162005 | -5.631104821 |
| 1417847_at   | 0.002549337  | 9.150931694 | 0.039695442  | 0.969165936 | 0.969165936 | -5.631105015 |
| 1449184_at   | -0.009914228 | 5.782756815 | -0.0396899   | 0.969170238 | 0.969170238 | -5.631105228 |
| 1428001_at   | 0.004171067  | 3.314406357 | 0.039578514  | 0.969256709 | 0.969256709 | -5.631109497 |
| 1456009_x_at | -0.003325871 | 8.425219492 | -0.039545123 | 0.969282631 | 0.969282631 | -5.631110775 |
| 1456595_x_at | 0.00400999   | 3.945605306 | 0.039477146  | 0.969335403 | 0.969335403 | -5.631113372 |
| 1445357_at   | -0.003259278 | 3.738907495 | -0.039445204 | 0.969360201 | 0.969360201 | -5.631114591 |
| 1452945_at   | 0.003091301  | 7.856419056 | 0.039432457  | 0.969370096 | 0.969370096 | -5.631115077 |
| 1452217_at   | -0.003649162 | 11.25247931 | -0.039431032 | 0.969371202 | 0.969371202 | -5.631115131 |
| 1431225_at   | 0.022959365  | 10.54205272 | 0.039412695  | 0.969385438 | 0.969385438 | -5.63111583  |
| 1437695_at   | 0.004380669  | 4.08035735  | 0.039397536  | 0.969397206 | 0.969397206 | -5.631116408 |
| 1451100_a_at | 0.003834591  | 7.383982356 | 0.039299989  | 0.969472934 | 0.969472934 | -5.63112012  |

|              |              |             |              |             |             |              |
|--------------|--------------|-------------|--------------|-------------|-------------|--------------|
| 1460567_at   | 0.006988844  | 8.700535202 | 0.039248382  | 0.969512998 | 0.969512998 | -5.63112208  |
| 1429873_at   | 0.005247235  | 4.704746814 | 0.039246526  | 0.96951444  | 0.96951444  | -5.63112215  |
| 1437455_a_at | 0.007049981  | 11.16089715 | 0.039194314  | 0.969554973 | 0.969554973 | -5.631124131 |
| 1454936_at   | -0.002473233 | 6.84710097  | -0.039173284 | 0.969571299 | 0.969571299 | -5.631124928 |
| 1417663_a_at | 0.002832138  | 8.121571721 | 0.03915514   | 0.969585385 | 0.969585385 | -5.631125615 |
| 1445238_at   | -0.003524796 | 4.318893895 | -0.039124421 | 0.969609233 | 0.969609233 | -5.631126777 |
| 1433210_at   | -0.003726912 | 4.106499497 | -0.039028953 | 0.969683349 | 0.969683349 | -5.631130385 |
| 1458314_at   | -0.003592459 | 3.478473861 | -0.038940519 | 0.969752003 | 0.969752003 | -5.631133719 |
| 1438342_at   | -0.00332048  | 6.551691282 | -0.038928443 | 0.969761379 | 0.969761379 | -5.631134174 |
| 1447136_at   | 0.003191864  | 3.193543412 | 0.038857511  | 0.969816446 | 0.969816446 | -5.631136842 |
| 1439109_at   | 0.006301601  | 4.382313838 | 0.038848295  | 0.9698236   | 0.9698236   | -5.631137188 |
| 1421461_at   | -0.003543352 | 4.78946626  | -0.038833216 | 0.969835307 | 0.969835307 | -5.631137754 |
| 1453244_at   | 0.002458354  | 3.68788063  | 0.038759616  | 0.969892446 | 0.969892446 | -5.631140516 |
| 1454012_a_at | 0.00386582   | 4.016798669 | 0.038739706  | 0.969907903 | 0.969907903 | -5.631141262 |
| 1421676_at   | -0.002728477 | 3.210665284 | -0.038710222 | 0.969930793 | 0.969930793 | -5.631142366 |
| 1435316_at   | -0.004143217 | 4.327346324 | -0.038693508 | 0.969943769 | 0.969943769 | -5.631142991 |
| 1456521_at   | -0.005337529 | 6.420954234 | -0.038638615 | 0.969986385 | 0.969986385 | -5.631145044 |
| 1453292_at   | 0.003438633  | 3.859308387 | 0.03861994   | 0.970000883 | 0.970000883 | -5.631145741 |
| 1417366_s_at | -0.00359634  | 10.53625125 | -0.038565703 | 0.970042991 | 0.970042991 | -5.631147766 |
| 1433678_at   | -0.003834835 | 6.341617842 | -0.03853133  | 0.970069676 | 0.970069676 | -5.631149047 |
| 1417954_at   | 0.00415202   | 5.24048463  | 0.038489761  | 0.970101948 | 0.970101948 | -5.631150595 |
| 1426151_a_at | 0.00378915   | 4.81338941  | 0.038473309  | 0.970114721 | 0.970114721 | -5.631151207 |
| 1419208_at   | -0.005433632 | 4.346135614 | -0.038408807 | 0.970164798 | 0.970164798 | -5.631153605 |
| 1424073_at   | -0.002519179 | 9.274587132 | -0.03839612  | 0.970174647 | 0.970174647 | -5.631154076 |
| 1459964_at   | 0.002680232  | 5.833281335 | 0.038380793  | 0.970186546 | 0.970186546 | -5.631154645 |
| 1447110_at   | 0.00299282   | 3.673803922 | 0.038364789  | 0.970198971 | 0.970198971 | -5.631155239 |
| 1455387_at   | -0.003685083 | 9.544467472 | -0.038332337 | 0.970224166 | 0.970224166 | -5.631156443 |
| 1423840_at   | 0.003599295  | 8.969599298 | 0.038272885  | 0.970270322 | 0.970270322 | -5.631158645 |
| 1438920_x_at | 0.003125072  | 3.449950972 | 0.038270502  | 0.970272172 | 0.970272172 | -5.631158733 |
| 1449134_s_at | -0.002737983 | 3.136635832 | -0.038254903 | 0.970284282 | 0.970284282 | -5.63115931  |
| 1433912_at   | 0.002935782  | 9.742586402 | 0.038168087  | 0.970351683 | 0.970351683 | -5.631162518 |
| 1418112_at   | 0.002679062  | 9.090772108 | 0.038154833  | 0.970361973 | 0.970361973 | -5.631163007 |
| 1418307_a_at | 0.002842412  | 3.216698113 | 0.038124011  | 0.970385903 | 0.970385903 | -5.631164144 |
| 1420282_s_at | -0.003889265 | 3.892696557 | -0.038072366 | 0.970425998 | 0.970425998 | -5.631166047 |
| 1432969_at   | -0.004862086 | 4.285287264 | -0.038067335 | 0.970429904 | 0.970429904 | -5.631166232 |
| 1420975_at   | 0.003492738  | 8.121833103 | 0.038048995  | 0.970444143 | 0.970444143 | -5.631166907 |
| 1443986_at   | 0.004038995  | 6.214485537 | 0.037991733  | 0.970488599 | 0.970488599 | -5.631169013 |
| 1451026_at   | 0.003031188  | 7.859197285 | 0.037967739  | 0.970507227 | 0.970507227 | -5.631169894 |
| 1438222_at   | 0.002387096  | 8.224606205 | 0.03796371   | 0.970510355 | 0.970510355 | -5.631170042 |
| 1429334_at   | 0.003118064  | 3.766599397 | 0.037886266  | 0.970570481 | 0.970570481 | -5.631172882 |
| 1419242_at   | -0.004610577 | 3.739406702 | -0.037877375 | 0.970577383 | 0.970577383 | -5.631173208 |
| 1442478_at   | -0.002405059 | 3.406195797 | -0.037865593 | 0.970586531 | 0.970586531 | -5.631173639 |
| 1421331_at   | 0.003171941  | 5.978633083 | 0.037790915  | 0.970644509 | 0.970644509 | -5.631176371 |
| 1443063_at   | -0.002832034 | 3.366451795 | -0.037786022 | 0.970648308 | 0.970648308 | -5.63117655  |
| 1428076_s_at | 0.002784459  | 9.903423242 | 0.037760232  | 0.97066833  | 0.97066833  | -5.631177492 |
| 1420678_a_at | 0.003053112  | 4.676604823 | 0.037704049  | 0.97071195  | 0.97071195  | -5.631179542 |
| 1453200_at   | 0.003354615  | 9.254915999 | 0.037676946  | 0.970732992 | 0.970732992 | -5.63118053  |
| 1437451_at   | -0.003245892 | 7.140843955 | -0.03765634  | 0.97074899  | 0.97074899  | -5.63118128  |
| 1451062_a_at | 0.003668893  | 4.711479142 | 0.037643426  | 0.970759017 | 0.970759017 | -5.631181751 |
| 1457672_at   | 0.003196147  | 8.459344448 | 0.037607884  | 0.97078661  | 0.97078661  | -5.631183044 |
| 1440895_at   | 0.003321592  | 4.419329218 | 0.037580362  | 0.970807978 | 0.970807978 | -5.631184044 |
| 1457042_at   | 0.002642179  | 9.998288515 | 0.037576267  | 0.970811158 | 0.970811158 | -5.631184193 |
| 1449986_at   | -0.002988624 | 3.258855938 | -0.037569313 | 0.970816556 | 0.970816556 | -5.631184446 |

|              |              |             |              |             |             |              |
|--------------|--------------|-------------|--------------|-------------|-------------|--------------|
| 1452121_at   | -0.002691616 | 5.585318931 | -0.037565953 | 0.970819166 | 0.970819166 | -5.631184568 |
| 1455469_at   | -0.003466329 | 5.009368388 | -0.037554672 | 0.970827924 | 0.970827924 | -5.631184978 |
| 1448822_at   | 0.002356582  | 11.14684515 | 0.037533899  | 0.970844052 | 0.970844052 | -5.631185732 |
| 1428042_at   | 0.003324248  | 4.660378153 | 0.037515895  | 0.970858029 | 0.970858029 | -5.631186385 |
| 1451154_a_at | 0.006255234  | 8.807570402 | 0.037509287  | 0.97086316  | 0.97086316  | -5.631186625 |
| 1430280_at   | 0.002451429  | 6.09182445  | 0.037461831  | 0.970900004 | 0.970900004 | -5.631188345 |
| 1450952_at   | 0.003133413  | 5.16746569  | 0.037424818  | 0.97092874  | 0.97092874  | -5.631189686 |
| 1440107_at   | -0.002882648 | 6.756957139 | -0.037383264 | 0.970961003 | 0.970961003 | -5.631191189 |
| 1429684_at   | 0.004725577  | 7.570173888 | 0.037308468  | 0.971019074 | 0.971019074 | -5.63119389  |
| 1440623_at   | 0.003415122  | 4.225820112 | 0.037300578  | 0.9710252   | 0.9710252   | -5.631194175 |
| 1440383_at   | -0.003746116 | 5.843291339 | -0.037224135 | 0.97108455  | 0.97108455  | -5.631196929 |
| 1449053_s_at | 0.003157146  | 8.427259119 | 0.0372201    | 0.971087683 | 0.971087683 | -5.631197075 |
| 1419933_at   | 0.004029316  | 3.254180077 | 0.037182641  | 0.971116766 | 0.971116766 | -5.631198422 |
| 1437850_a_at | -0.006219265 | 9.625978405 | -0.037160263 | 0.97113414  | 0.97113414  | -5.631199227 |
| 1437069_at   | -0.003204844 | 7.741260241 | -0.037136916 | 0.971152266 | 0.971152266 | -5.631200065 |
| 1425517_s_at | -0.002778181 | 10.24980987 | -0.037107456 | 0.971175139 | 0.971175139 | -5.631201123 |
| 1431727_at   | 0.002467054  | 4.498411974 | 0.037081101  | 0.971195601 | 0.971195601 | -5.631202068 |
| 1434731_x_at | 0.002628745  | 12.43637362 | 0.037032165  | 0.971233595 | 0.971233595 | -5.631203822 |
| 1436662_at   | 0.002992539  | 3.886832552 | 0.037019497  | 0.97124343  | 0.97124343  | -5.631204276 |
| 1426440_at   | -0.004135257 | 7.536053316 | -0.037011173 | 0.971249893 | 0.971249893 | -5.631204574 |
| 1416238_at   | -0.005045603 | 7.44159514  | -0.036996884 | 0.971260987 | 0.971260987 | -5.631205085 |
| 1421385_a_at | 0.011292351  | 6.387079127 | 0.036970134  | 0.971281756 | 0.971281756 | -5.631206042 |
| 1425903_at   | -0.003160092 | 6.307195594 | -0.036969134 | 0.971282533 | 0.971282533 | -5.631206077 |
| 1421315_s_at | -0.002600833 | 9.158336302 | -0.036966192 | 0.971284817 | 0.971284817 | -5.631206182 |
| 1441796_at   | -0.002612626 | 4.580228004 | -0.036917559 | 0.971322575 | 0.971322575 | -5.63120792  |
| 1454412_at   | 0.003165503  | 4.635590673 | 0.036879669  | 0.971351993 | 0.971351993 | -5.631209272 |
| 1442237_at   | -0.003506472 | 3.997273868 | -0.036877414 | 0.971353745 | 0.971353745 | -5.631209352 |
| 1417621_at   | 0.004284325  | 7.008709268 | 0.036846493  | 0.971377752 | 0.971377752 | -5.631210455 |
| 1432423_a_at | -0.003739621 | 4.328159857 | -0.036824388 | 0.971394914 | 0.971394914 | -5.631211242 |
| 1430477_s_at | 0.003116761  | 5.370083507 | 0.036820615  | 0.971397844 | 0.971397844 | -5.631211376 |
| 1440313_at   | -0.00309178  | 5.993825721 | -0.036813822 | 0.971403118 | 0.971403118 | -5.631211618 |
| 1456532_at   | 0.008574874  | 5.640789128 | 0.036812944  | 0.9714038   | 0.9714038   | -5.63121165  |
| 1434342_at   | -0.005506617 | 5.120824959 | -0.036758024 | 0.97144644  | 0.97144644  | -5.631213603 |
| 1416088_a_at | -0.00253207  | 13.19932094 | -0.036757606 | 0.971446764 | 0.971446764 | -5.631213618 |
| 1441556_at   | 0.00317609   | 8.750500461 | 0.036742236  | 0.971458698 | 0.971458698 | -5.631214164 |
| 1458612_at   | -0.003212485 | 3.716193315 | -0.03669602  | 0.97149458  | 0.97149458  | -5.631215805 |
| 1421573_at   | -0.002719656 | 3.998954881 | -0.036684182 | 0.971503772 | 0.971503772 | -5.631216226 |
| 1444314_at   | -0.003037364 | 5.275382255 | -0.036538516 | 0.971616869 | 0.971616869 | -5.631221383 |
| 1439318_at   | 0.004271849  | 5.87102111  | 0.036441777  | 0.971691979 | 0.971691979 | -5.631224797 |
| 1423741_at   | -0.003000804 | 9.196569681 | -0.036434421 | 0.97169769  | 0.97169769  | -5.631225056 |
| 1438475_at   | -0.003185251 | 4.703631464 | -0.036400553 | 0.971723986 | 0.971723986 | -5.631226249 |
| 1446348_at   | 0.002596414  | 4.229616103 | 0.036346973  | 0.971765587 | 0.971765587 | -5.631228133 |
| 1442382_at   | -0.003173668 | 7.004178567 | -0.036312269 | 0.971792532 | 0.971792532 | -5.631229353 |
| 1439158_at   | 0.003071323  | 6.152194148 | 0.036289595  | 0.971810137 | 0.971810137 | -5.631230149 |
| 1437463_x_at | -0.004188659 | 8.553936337 | -0.036267142 | 0.97182757  | 0.97182757  | -5.631230936 |
| 1447766_x_at | -0.002353526 | 4.582175913 | -0.036255167 | 0.971836868 | 0.971836868 | -5.631231356 |
| 1435075_at   | 0.002960779  | 7.669495977 | 0.036233357  | 0.971853802 | 0.971853802 | -5.631232121 |
| 1450005_x_at | -0.003586035 | 6.122182705 | -0.036209731 | 0.971872146 | 0.971872146 | -5.631232948 |
| 1424987_at   | 0.002409476  | 5.383689819 | 0.036201265  | 0.971878719 | 0.971878719 | -5.631233245 |
| 1448768_at   | 0.004255243  | 3.324598899 | 0.036157386  | 0.971912787 | 0.971912787 | -5.63123478  |
| 1428025_s_at | 0.002835941  | 5.151516866 | 0.036151362  | 0.971917465 | 0.971917465 | -5.631234991 |
| 1430374_at   | -0.003020556 | 3.955298773 | -0.036111129 | 0.971948703 | 0.971948703 | -5.631236396 |
| 1425161_a_at | -0.003586152 | 7.316836093 | -0.036095631 | 0.971960736 | 0.971960736 | -5.631236937 |

|              |              |             |              |             |             |              |
|--------------|--------------|-------------|--------------|-------------|-------------|--------------|
| 1426915_at   | 0.002825405  | 8.864792897 | 0.03597208   | 0.972056665 | 0.972056665 | -5.631241243 |
| 1419820_at   | -0.002399049 | 3.311070926 | -0.035905038 | 0.972108719 | 0.972108719 | -5.631243573 |
| 1436682_at   | -0.002910041 | 4.576317769 | -0.035895063 | 0.972116464 | 0.972116464 | -5.631243919 |
| 1449454_at   | -0.003052313 | 3.181427529 | -0.03583655  | 0.972161896 | 0.972161896 | -5.631245949 |
| 1457771_at   | -0.002542397 | 3.913519219 | -0.035826109 | 0.972170003 | 0.972170003 | -5.631246311 |
| 1452274_at   | 0.002857174  | 8.974537771 | 0.03582319   | 0.972172269 | 0.972172269 | -5.631246412 |
| 1449048_s_at | -0.003240453 | 7.970924678 | -0.035780901 | 0.972205104 | 0.972205104 | -5.631247876 |
| 1416250_at   | -0.003817647 | 8.449160617 | -0.035756768 | 0.972223841 | 0.972223841 | -5.631248711 |
| 1443281_at   | -0.00246878  | 4.60951385  | -0.035740976 | 0.972236104 | 0.972236104 | -5.631249257 |
| 1449771_at   | -0.002333854 | 3.731960619 | -0.03567255  | 0.972289233 | 0.972289233 | -5.631251619 |
| 1441954_s_at | 0.002779237  | 3.644694992 | 0.035655601  | 0.972302393 | 0.972302393 | -5.631252204 |
| 1441348_at   | -0.00377017  | 7.95624809  | -0.035598261 | 0.972346914 | 0.972346914 | -5.63125418  |
| 1445125_at   | 0.002811272  | 4.607795065 | 0.035596562  | 0.972348233 | 0.972348233 | -5.631254238 |
| 1438793_x_at | -0.002230322 | 5.566889512 | -0.035574137 | 0.972365645 | 0.972365645 | -5.63125501  |
| 1425272_at   | -0.003497857 | 6.370530799 | -0.035572736 | 0.972366732 | 0.972366732 | -5.631255058 |
| 1455965_at   | 0.005046552  | 6.546626048 | 0.035540481  | 0.972391777 | 0.972391777 | -5.631256167 |
| 1444966_at   | 0.003810769  | 4.705571367 | 0.035540326  | 0.972391897 | 0.972391897 | -5.631256172 |
| 1422115_a_at | 0.002550963  | 3.992662988 | 0.035482518  | 0.972436782 | 0.972436782 | -5.631258158 |
| 1428773_s_at | -0.003622737 | 7.193415166 | -0.035456134 | 0.972457268 | 0.972457268 | -5.631259063 |
| 1445599_at   | -0.004213021 | 3.712462358 | -0.035443625 | 0.972466981 | 0.972466981 | -5.631259491 |
| 1455920_x_at | -0.002804319 | 3.425678173 | -0.035388796 | 0.972509553 | 0.972509553 | -5.631261369 |
| 1442266_at   | -0.003249961 | 3.634505058 | -0.035386377 | 0.972511431 | 0.972511431 | -5.631261452 |
| 1438721_a_at | -0.00746976  | 6.15365566  | -0.035239103 | 0.972625783 | 0.972625783 | -5.631266482 |
| 1452264_at   | -0.005580404 | 7.955780523 | -0.035180215 | 0.972671507 | 0.972671507 | -5.631268487 |
| 1439701_at   | -0.003467485 | 3.124189049 | -0.035151718 | 0.972693634 | 0.972693634 | -5.631269456 |
| 1453027_at   | -0.003063515 | 4.718357488 | -0.035130897 | 0.972709801 | 0.972709801 | -5.631270163 |
| 1440128_s_at | -0.004424991 | 4.617109141 | -0.035127232 | 0.972712646 | 0.972712646 | -5.631270288 |
| 1431362_a_at | 0.004814227  | 8.874821487 | 0.034986231  | 0.972822128 | 0.972822128 | -5.631275068 |
| 1443586_at   | 0.003006789  | 7.902595098 | 0.034969082  | 0.972835444 | 0.972835444 | -5.631275648 |
| 1449517_at   | 0.002842524  | 6.121105284 | 0.034966746  | 0.972837258 | 0.972837258 | -5.631275727 |
| 1450537_at   | -0.003918825 | 4.909505572 | -0.034965863 | 0.972837943 | 0.972837943 | -5.631275757 |
| 1429772_at   | 0.005772623  | 5.644117603 | 0.034945222  | 0.97285397  | 0.97285397  | -5.631276455 |
| 1458702_at   | -0.003133553 | 6.726688231 | -0.034890332 | 0.972896591 | 0.972896591 | -5.631278308 |
| 1437948_x_at | 0.002918795  | 3.754616926 | 0.034865526  | 0.972915852 | 0.972915852 | -5.631279145 |
| 1436576_at   | 0.003469674  | 3.731082785 | 0.034801907  | 0.97296525  | 0.97296525  | -5.631281288 |
| 1452699_at   | -0.002543568 | 8.915642563 | -0.034778712 | 0.972983261 | 0.972983261 | -5.631282069 |
| 1443035_at   | 0.002295195  | 4.200666567 | 0.034758884  | 0.972998656 | 0.972998656 | -5.631282735 |
| 1443441_x_at | -0.002929681 | 5.792683699 | -0.034750946 | 0.97300482  | 0.97300482  | -5.631283002 |
| 1418928_a_at | -0.002353277 | 7.775834745 | -0.034660096 | 0.973075362 | 0.973075362 | -5.631286051 |
| 1424753_at   | 0.002759112  | 7.666219874 | 0.03462429   | 0.973103165 | 0.973103165 | -5.631287251 |
| 1441172_at   | 0.003584916  | 7.966021212 | 0.034613943  | 0.9731112   | 0.9731112   | -5.631287597 |
| 1437227_at   | 0.003796608  | 6.400329515 | 0.034568479  | 0.973146501 | 0.973146501 | -5.631289118 |
| 1434193_at   | 0.002513648  | 7.059382557 | 0.034564178  | 0.973149841 | 0.973149841 | -5.631289262 |
| 1458008_at   | -0.003156421 | 4.711978006 | -0.034550498 | 0.973160463 | 0.973160463 | -5.631289719 |
| 1417970_at   | 0.002506816  | 7.856634965 | 0.034476547  | 0.973217885 | 0.973217885 | -5.631292188 |
| 1418747_at   | -0.002492135 | 6.382612388 | -0.034450746 | 0.973237918 | 0.973237918 | -5.631293047 |
| 1428747_at   | 0.002268469  | 8.59398686  | 0.034422779  | 0.973259634 | 0.973259634 | -5.631293979 |
| 1437806_x_at | 0.00271432   | 3.315306585 | 0.034411515  | 0.973268381 | 0.973268381 | -5.631294354 |
| 1426136_x_at | 0.002262852  | 6.631708485 | 0.034386948  | 0.973287457 | 0.973287457 | -5.631295171 |
| 1434382_at   | -0.003467538 | 8.427007795 | -0.0343656   | 0.973304033 | 0.973304033 | -5.631295881 |
| 1428893_at   | 0.002732251  | 6.536454887 | 0.034361828  | 0.973306961 | 0.973306961 | -5.631296006 |
| 1420850_at   | 0.00228748   | 8.556751448 | 0.03430906   | 0.973347935 | 0.973347935 | -5.631297758 |
| 1459129_at   | -0.003662066 | 4.497996703 | -0.034242888 | 0.973399317 | 0.973399317 | -5.631299952 |



|              |              |             |              |             |             |              |
|--------------|--------------|-------------|--------------|-------------|-------------|--------------|
| 1428242_at   | 0.002940473  | 5.49103717  | 0.034239832  | 0.97340169  | 0.97340169  | -5.631300053 |
| 1455480_s_at | 0.002174815  | 10.62813125 | 0.034121775  | 0.97349336  | 0.97349336  | -5.631303955 |
| 1458773_at   | 0.002867476  | 4.705375455 | 0.03408894   | 0.973518856 | 0.973518856 | -5.631305038 |
| 1431634_at   | 0.005015775  | 5.229496225 | 0.033990334  | 0.973595423 | 0.973595423 | -5.631308284 |
| 1439907_at   | 0.003346939  | 5.707099127 | 0.033940309  | 0.973634267 | 0.973634267 | -5.631309928 |
| 1443127_at   | -0.004141255 | 5.9865325   | -0.033880298 | 0.973680865 | 0.973680865 | -5.631311896 |
| 1445012_at   | -0.002685692 | 3.407613598 | -0.033879332 | 0.973681616 | 0.973681616 | -5.631311927 |
| 1430208_at   | -0.003081449 | 4.874177453 | -0.033872805 | 0.973686684 | 0.973686684 | -5.631312141 |
| 1441095_at   | -0.002615614 | 5.217889653 | -0.033835029 | 0.973716017 | 0.973716017 | -5.631313378 |
| 1444212_at   | 0.003339602  | 3.704517099 | 0.033781144  | 0.973757859 | 0.973757859 | -5.63131514  |
| 1437698_at   | -0.003704775 | 5.008185132 | -0.033781017 | 0.973757957 | 0.973757957 | -5.631315144 |
| 1448191_at   | 0.002537626  | 8.855084413 | 0.033777705  | 0.973760529 | 0.973760529 | -5.631315252 |
| 1451051_a_at | -0.003879605 | 7.943588254 | -0.033747909 | 0.973783665 | 0.973783665 | -5.631316225 |
| 1425569_a_at | 0.002681888  | 3.6417213   | 0.033745636  | 0.973785431 | 0.973785431 | -5.631316299 |
| 1422780_at   | 0.002442589  | 7.286356489 | 0.033737014  | 0.973792125 | 0.973792125 | -5.63131658  |
| 1437526_x_at | 0.005311656  | 10.37031292 | 0.033720773  | 0.973804736 | 0.973804736 | -5.63131711  |
| 1440130_at   | -0.003143712 | 4.330963726 | -0.033706679 | 0.973815681 | 0.973815681 | -5.63131757  |
| 1449203_at   | 0.002514682  | 3.974089422 | 0.033706034  | 0.973816181 | 0.973816181 | -5.631317591 |
| 1453020_at   | -0.002193288 | 7.597447954 | -0.033648857 | 0.97386058  | 0.97386058  | -5.631319453 |
| 1428188_at   | -0.002984513 | 7.42065498  | -0.033648781 | 0.973860639 | 0.973860639 | -5.631319455 |
| 1420240_at   | 0.002484066  | 3.864440682 | 0.033612564  | 0.973888762 | 0.973888762 | -5.631320633 |
| 1454999_at   | -0.002613021 | 4.914531722 | -0.033557071 | 0.973931852 | 0.973931852 | -5.631322436 |
| 1445003_at   | 0.003578255  | 6.578067134 | 0.033554382  | 0.973933941 | 0.973933941 | -5.631322523 |
| 1432471_at   | -0.005400084 | 5.343872844 | -0.033480071 | 0.973991644 | 0.973991644 | -5.631324932 |
| 1433486_at   | -0.003019059 | 7.064519353 | -0.033462339 | 0.974005412 | 0.974005412 | -5.631325506 |
| 1420596_at   | 0.003616386  | 5.691638193 | 0.03344046   | 0.974022402 | 0.974022402 | -5.631326213 |
| 1434501_at   | -0.002798779 | 4.779201275 | -0.033435454 | 0.974026289 | 0.974026289 | -5.631326375 |
| 1447347_at   | -0.003269515 | 4.4211553   | -0.033309552 | 0.974124054 | 0.974124054 | -5.631330439 |
| 1435273_at   | 0.004686015  | 6.497943024 | 0.033300323  | 0.97413122  | 0.97413122  | -5.631330736 |
| 1431347_at   | 0.002645454  | 5.334418654 | 0.033287133  | 0.974141462 | 0.974141462 | -5.631331161 |
| 1428294_at   | -0.003329764 | 5.916687295 | -0.033256039 | 0.974165608 | 0.974165608 | -5.631332161 |
| 1448777_at   | -0.003725173 | 10.0237431  | -0.033252841 | 0.974168091 | 0.974168091 | -5.631332264 |
| 1426434_at   | -0.002395727 | 8.29979685  | -0.033216993 | 0.974195927 | 0.974195927 | -5.631333416 |
| 1457516_at   | -0.004930378 | 3.774304223 | -0.033204908 | 0.974205311 | 0.974205311 | -5.631333804 |
| 1448065_at   | 0.002339865  | 5.094738169 | 0.033202695  | 0.97420703  | 0.97420703  | -5.631333875 |
| 1450954_at   | 0.004995136  | 8.631352418 | 0.033170403  | 0.974232105 | 0.974232105 | -5.631334912 |
| 1424625_a_at | 0.003987183  | 7.718190535 | 0.033166365  | 0.97423524  | 0.97423524  | -5.631335041 |
| 1449708_s_at | -0.002995686 | 8.798450242 | -0.033154699 | 0.974244299 | 0.974244299 | -5.631335415 |
| 1444787_at   | -0.003756789 | 6.740496424 | -0.033121412 | 0.974270147 | 0.974270147 | -5.631336482 |
| 1440882_at   | 0.002931434  | 6.409440104 | 0.03311164   | 0.974277736 | 0.974277736 | -5.631336795 |
| 1430416_at   | -0.002822726 | 4.211422405 | -0.033102923 | 0.974284505 | 0.974284505 | -5.631337074 |
| 1442631_at   | 0.002362137  | 3.288756979 | 0.033102818  | 0.974284586 | 0.974284586 | -5.631337078 |
| 1449911_at   | -0.00244763  | 4.928566729 | -0.033052651 | 0.974323542 | 0.974323542 | -5.631338682 |
| 1432654_at   | 0.003322997  | 4.681423488 | 0.033015645  | 0.974352278 | 0.974352278 | -5.631339865 |
| 1436982_at   | 0.002489823  | 8.911603508 | 0.033003121  | 0.974362003 | 0.974362003 | -5.631340264 |
| 1438945_x_at | 0.004348576  | 10.1287242  | 0.032946531  | 0.974405946 | 0.974405946 | -5.631342069 |
| 1450328_at   | -0.002794579 | 3.398291672 | -0.032913725 | 0.974431421 | 0.974431421 | -5.631343114 |
| 1444523_s_at | -0.00294124  | 10.53394764 | -0.032878112 | 0.974459076 | 0.974459076 | -5.631344247 |
| 1455017_a_at | -0.003133985 | 7.154538606 | -0.032812194 | 0.974510263 | 0.974510263 | -5.631346341 |
| 1437711_x_at | -0.004718971 | 10.46879015 | -0.032663613 | 0.974625641 | 0.974625641 | -5.631351045 |
| 1418386_at   | -0.002203227 | 8.514703337 | -0.032637146 | 0.974646194 | 0.974646194 | -5.631351881 |
| 1452979_at   | 0.002470093  | 7.002291507 | 0.032613235  | 0.974664761 | 0.974664761 | -5.631352635 |
| 1440248_at   | -0.006398426 | 7.466366027 | -0.032600789 | 0.974674426 | 0.974674426 | -5.631353027 |

|              |              |             |              |             |             |              |
|--------------|--------------|-------------|--------------|-------------|-------------|--------------|
| 1455366_at   | -0.002549079 | 5.47957012  | -0.032584645 | 0.974686962 | 0.974686962 | -5.631353536 |
| 1444611_at   | -0.003940664 | 5.957945017 | -0.032552162 | 0.974712187 | 0.974712187 | -5.631354559 |
| 1438150_at   | -0.002961122 | 3.23252942  | -0.032524646 | 0.974733553 | 0.974733553 | -5.631355425 |
| 1419115_at   | -0.002753685 | 7.498803549 | -0.032508584 | 0.974746026 | 0.974746026 | -5.63135593  |
| 1416378_at   | 0.003463883  | 6.86676975  | 0.032481006  | 0.974767441 | 0.974767441 | -5.631356797 |
| 1453457_at   | 0.003198858  | 6.194055535 | 0.03239204   | 0.974836527 | 0.974836527 | -5.631359588 |
| 1457650_x_at | -0.003756037 | 4.931495164 | -0.032282998 | 0.974921203 | 0.974921203 | -5.631362998 |
| 1421950_at   | 0.003243517  | 9.270625714 | 0.032260314  | 0.974938818 | 0.974938818 | -5.631363706 |
| 1433310_at   | 0.003429943  | 4.622332857 | 0.032252418  | 0.97494495  | 0.97494495  | -5.631363952 |
| 1438653_x_at | -0.002588921 | 12.17673264 | -0.032200611 | 0.97498518  | 0.97498518  | -5.631365567 |
| 1455047_at   | -0.002151261 | 8.614501515 | -0.032187584 | 0.974995296 | 0.974995296 | -5.631365972 |
| 1446423_at   | -0.003571937 | 4.637695652 | -0.032177419 | 0.97500319  | 0.97500319  | -5.631366289 |
| 1458485_at   | -0.002609166 | 3.527238415 | -0.032160115 | 0.975016627 | 0.975016627 | -5.631366827 |
| 1422613_a_at | 0.001908315  | 13.82475251 | 0.032146087  | 0.975027521 | 0.975027521 | -5.631367263 |
| 1433287_at   | 0.003512631  | 3.828651878 | 0.032144673  | 0.975028619 | 0.975028619 | -5.631367307 |
| 1434745_at   | -0.003006951 | 12.3916946  | -0.032133641 | 0.975037186 | 0.975037186 | -5.63136765  |
| 1456535_at   | 0.002105798  | 4.384261531 | 0.032112894  | 0.975053296 | 0.975053296 | -5.631368295 |
| 1434280_at   | 0.006591238  | 8.669251849 | 0.032055441  | 0.975097912 | 0.975097912 | -5.631370077 |
| 1439649_at   | -0.004190087 | 6.204670738 | -0.032054522 | 0.975098625 | 0.975098625 | -5.631370106 |
| 1458284_at   | -0.002401941 | 8.571924241 | -0.032008927 | 0.975134032 | 0.975134032 | -5.631371518 |
| 1435694_at   | 0.004120002  | 5.07372527  | 0.031977042  | 0.975158793 | 0.975158793 | -5.631372505 |
| 1427729_at   | 0.003357837  | 6.911624003 | 0.031925557  | 0.975198773 | 0.975198773 | -5.631374096 |
| 1423846_x_at | -0.002208704 | 13.87908888 | -0.031899385 | 0.975219097 | 0.975219097 | -5.631374904 |
| 1438954_x_at | 0.004409364  | 5.122478622 | 0.031855862  | 0.975252895 | 0.975252895 | -5.631376245 |
| 1438852_x_at | -0.005074356 | 9.17483618  | -0.031848247 | 0.975258808 | 0.975258808 | -5.63137648  |
| 1425832_a_at | 0.002289163  | 3.546624652 | 0.03183404   | 0.975269841 | 0.975269841 | -5.631376917 |
| 1418762_at   | 0.003495749  | 6.511097405 | 0.031716419  | 0.975361181 | 0.975361181 | -5.631380532 |
| 1448791_at   | 0.002167712  | 10.91735222 | 0.031704438  | 0.975370485 | 0.975370485 | -5.631380899 |
| 1435767_at   | -0.009153277 | 7.101190356 | -0.031626509 | 0.975431001 | 0.975431001 | -5.631383286 |
| 1418323_at   | 0.002779307  | 6.24799095  | 0.0316212    | 0.975435124 | 0.975435124 | -5.631383448 |
| 1441169_at   | 0.003408185  | 4.022899255 | 0.031593727  | 0.975456459 | 0.975456459 | -5.631384288 |
| 1443920_at   | -0.002274513 | 6.946176026 | -0.031560518 | 0.975482248 | 0.975482248 | -5.631385302 |
| 1420716_at   | -0.002762932 | 3.912269054 | -0.031487987 | 0.975538573 | 0.975538573 | -5.631387513 |
| 1434129_s_at | 0.002471166  | 9.703362333 | 0.031406059  | 0.975602195 | 0.975602195 | -5.631390005 |
| 1455135_at   | 0.003718735  | 7.631150484 | 0.031366313  | 0.97563306  | 0.97563306  | -5.631391211 |
| 1458799_at   | -0.002543879 | 3.526407724 | -0.031330448 | 0.975660912 | 0.975660912 | -5.631392299 |
| 1422940_x_at | 0.0024835    | 3.598145019 | 0.031307789  | 0.975678508 | 0.975678508 | -5.631392985 |
| 1415756_a_at | -0.002170784 | 9.175429785 | -0.031299314 | 0.97568509  | 0.97568509  | -5.631393242 |
| 1416676_at   | 0.00259627   | 3.709046009 | 0.031235859  | 0.975734368 | 0.975734368 | -5.63139516  |
| 1450536_s_at | -0.002216929 | 4.180411549 | -0.031219508 | 0.975747065 | 0.975747065 | -5.631395654 |
| 1443760_at   | -0.00279976  | 7.235496057 | -0.031210615 | 0.975753971 | 0.975753971 | -5.631395923 |
| 1441656_at   | 0.002397329  | 8.709069095 | 0.031204365  | 0.975758824 | 0.975758824 | -5.631396111 |
| 1435575_at   | 0.002255139  | 8.550532505 | 0.031183128  | 0.975775317 | 0.975775317 | -5.631396752 |
| 1460375_at   | 0.00196771   | 6.240414259 | 0.031151841  | 0.975799614 | 0.975799614 | -5.631397695 |
| 1449644_at   | -0.002803318 | 4.083287477 | -0.031123287 | 0.975821787 | 0.975821787 | -5.631398555 |
| 1437323_a_at | -0.00234153  | 3.268076381 | -0.031117318 | 0.975826423 | 0.975826423 | -5.631398735 |
| 1426747_at   | 0.002242901  | 8.172593401 | 0.03106281   | 0.975868752 | 0.975868752 | -5.631400373 |
| 1442424_at   | -0.019079996 | 5.072715513 | -0.031051357 | 0.975877647 | 0.975877647 | -5.631400718 |
| 1454341_at   | 0.003265237  | 3.841249363 | 0.030983833  | 0.975930085 | 0.975930085 | -5.631402743 |
| 1428998_at   | 0.002183468  | 10.00780648 | 0.030960702  | 0.975948047 | 0.975948047 | -5.631403436 |
| 1436802_at   | 0.00184704   | 8.694072163 | 0.030939428  | 0.975964568 | 0.975964568 | -5.631404073 |
| 1419012_at   | -0.003096302 | 6.284914279 | -0.030882949 | 0.976008429 | 0.976008429 | -5.631405761 |
| 1456352_a_at | 0.003361449  | 9.145755927 | 0.03084637   | 0.976036836 | 0.976036836 | -5.631406853 |

|              |              |             |              |             |             |              |
|--------------|--------------|-------------|--------------|-------------|-------------|--------------|
| 1437130_at   | 0.002529043  | 3.865814929 | 0.03084536   | 0.97603762  | 0.97603762  | -5.631406883 |
| 1428672_at   | -0.002227875 | 9.580159574 | -0.030814882 | 0.976061289 | 0.976061289 | -5.631407792 |
| 1425178_s_at | -0.002266495 | 7.656688628 | -0.030763841 | 0.976100926 | 0.976100926 | -5.631409312 |
| 1419045_at   | 0.003651127  | 5.716826962 | 0.030760612  | 0.976103434 | 0.976103434 | -5.631409408 |
| 1433609_s_at | -0.003201855 | 5.882189131 | -0.030702653 | 0.976148444 | 0.976148444 | -5.631411113 |
| 1453945_at   | 0.002743851  | 3.496567443 | 0.030683953  | 0.976162966 | 0.976162966 | -5.631411685 |
| 1458465_at   | -0.002394691 | 5.949698687 | -0.030661314 | 0.976180547 | 0.976180547 | -5.631412357 |
| 1435687_at   | -0.002313251 | 5.073408867 | -0.030656756 | 0.976184087 | 0.976184087 | -5.631412492 |
| 1438414_at   | -0.002639695 | 4.493869188 | -0.030624994 | 0.976208753 | 0.976208753 | -5.631413433 |
| 1431190_x_at | -0.00272646  | 7.788685128 | -0.030617514 | 0.976214562 | 0.976214562 | -5.631413655 |
| 1445449_at   | -0.002674809 | 5.510908454 | -0.03061291  | 0.976218138 | 0.976218138 | -5.631413791 |
| 1420077_at   | -0.004082052 | 3.663145694 | -0.030612423 | 0.976218515 | 0.976218515 | -5.631413806 |
| 1445073_at   | -0.002112148 | 3.639097882 | -0.03060883  | 0.976221306 | 0.976221306 | -5.631413912 |
| 1440818_s_at | 0.004795042  | 9.262230593 | 0.030501457  | 0.976304691 | 0.976304691 | -5.631417085 |
| 1445625_at   | -0.00248035  | 4.022488576 | -0.030494898 | 0.976309784 | 0.976309784 | -5.631417278 |
| 1448852_at   | -0.002497487 | 3.854064811 | -0.030452174 | 0.976342964 | 0.976342964 | -5.631418537 |
| 1426761_at   | 0.001998145  | 9.751773386 | 0.030373567  | 0.97640401  | 0.97640401  | -5.631420849 |
| 1416674_at   | -0.003262436 | 7.883446653 | -0.030228978 | 0.976516297 | 0.976516297 | -5.631425087 |
| 1438680_at   | 0.002449474  | 8.819990297 | 0.030184992  | 0.976550456 | 0.976550456 | -5.631426372 |
| 1424953_at   | 0.002506864  | 4.562235613 | 0.030175579  | 0.976557766 | 0.976557766 | -5.631426646 |
| 1436381_at   | 0.002761851  | 6.122385472 | 0.030175266  | 0.976558009 | 0.976558009 | -5.631426655 |
| 1454988_s_at | 0.002480128  | 8.888735107 | 0.030109807  | 0.976608845 | 0.976608845 | -5.631428564 |
| 1452146_a_at | -0.003208403 | 7.231182643 | -0.030064109 | 0.976644334 | 0.976644334 | -5.631429893 |
| 1444568_at   | 0.002920154  | 3.884786959 | 0.03006152   | 0.976646345 | 0.976646345 | -5.631429969 |
| 1436635_at   | 0.00250468   | 5.299276136 | 0.030047949  | 0.976656884 | 0.976656884 | -5.631430363 |
| 1439823_at   | -0.001973891 | 5.058009033 | -0.030025125 | 0.976674609 | 0.976674609 | -5.631431026 |
| 1424676_s_at | 0.002442315  | 4.462296355 | 0.03001778   | 0.976680313 | 0.976680313 | -5.631431239 |
| 1448829_at   | -0.002744448 | 8.24768251  | -0.030016178 | 0.976681557 | 0.976681557 | -5.631431286 |
| 1451625_a_at | -0.003553563 | 5.260584784 | -0.029985082 | 0.976705707 | 0.976705707 | -5.631432188 |
| 1448205_at   | -0.002045653 | 10.15931201 | -0.029977271 | 0.976711773 | 0.976711773 | -5.631432415 |
| 1434658_at   | -0.002700954 | 9.026790598 | -0.029966045 | 0.976720491 | 0.976720491 | -5.63143274  |
| 1458902_at   | 0.002724068  | 5.193488513 | 0.029965801  | 0.976720681 | 0.976720681 | -5.631432747 |
| 1443402_at   | -0.003224682 | 4.257283616 | -0.029907249 | 0.976766152 | 0.976766152 | -5.631434442 |
| 1425486_s_at | -0.003362241 | 8.710631903 | -0.029905685 | 0.976767367 | 0.976767367 | -5.631434487 |
| 1455036_s_at | 0.002314322  | 12.00600104 | 0.029892751  | 0.976777411 | 0.976777411 | -5.631434861 |
| 1425960_s_at | 0.003156714  | 3.663317717 | 0.029814583  | 0.976838118 | 0.976838118 | -5.631437118 |
| 1445877_at   | -0.0027444   | 3.389546459 | -0.029798716 | 0.97685044  | 0.97685044  | -5.631437576 |
| 1448153_at   | -0.002110316 | 11.39676934 | -0.029780855 | 0.976864311 | 0.976864311 | -5.63143809  |
| 1450322_s_at | 0.002480017  | 3.53402128  | 0.029721555  | 0.976910364 | 0.976910364 | -5.631439797 |
| 1454058_at   | -0.002593984 | 4.057021649 | -0.029702284 | 0.97692533  | 0.97692533  | -5.63144035  |
| 1438507_x_at | 0.002468841  | 12.84373658 | 0.029651341  | 0.976964893 | 0.976964893 | -5.631441812 |
| 1427565_a_at | 0.002298253  | 6.768360586 | 0.029622418  | 0.976987355 | 0.976987355 | -5.631442641 |
| 1429414_at   | -0.004033751 | 4.28263458  | -0.029620141 | 0.976989123 | 0.976989123 | -5.631442707 |
| 1433160_at   | 0.003257714  | 3.39474925  | 0.029590634  | 0.977012039 | 0.977012039 | -5.631443551 |
| 1416393_at   | 0.001872773  | 10.88003267 | 0.029576711  | 0.977022852 | 0.977022852 | -5.63144395  |
| 1422728_at   | -0.003669604 | 7.57460336  | -0.029548644 | 0.977044649 | 0.977044649 | -5.631444752 |
| 1420474_at   | 0.002328089  | 11.43030868 | 0.029546933  | 0.977045978 | 0.977045978 | -5.631444801 |
| 1455073_at   | 0.002781893  | 6.184460963 | 0.029537104  | 0.977053611 | 0.977053611 | -5.631445082 |
| 1419692_a_at | 0.002961344  | 5.443113236 | 0.029509929  | 0.977074716 | 0.977074716 | -5.631445858 |
| 1430240_a_at | -0.002051575 | 3.399904962 | -0.029396218 | 0.977163026 | 0.977163026 | -5.631449097 |
| 1445505_at   | -0.003308145 | 3.846868206 | -0.029356099 | 0.977194183 | 0.977194183 | -5.631450237 |
| 1446693_at   | 0.002004328  | 5.463725789 | 0.029272234  | 0.977259315 | 0.977259315 | -5.631452614 |
| 1456504_at   | -0.004544572 | 5.574830686 | -0.029238072 | 0.977285846 | 0.977285846 | -5.631453581 |

|              |              |             |              |             |             |              |
|--------------|--------------|-------------|--------------|-------------|-------------|--------------|
| 1449739_at   | 0.002135085  | 4.259490506 | 0.029192175  | 0.97732149  | 0.97732149  | -5.631454878 |
| 1422935_x_at | -0.002537421 | 8.203520761 | -0.029164819 | 0.977342736 | 0.977342736 | -5.63145565  |
| 1416375_at   | 0.002385027  | 7.589056004 | 0.029149813  | 0.97735439  | 0.97735439  | -5.631456073 |
| 1420735_at   | -0.0022083   | 3.748276383 | -0.029094451 | 0.977397386 | 0.977397386 | -5.631457632 |
| 1456775_at   | 0.00290452   | 6.816148907 | 0.029093561  | 0.977398076 | 0.977398076 | -5.631457657 |
| 1432056_at   | -0.002514154 | 4.215075458 | -0.029025681 | 0.977450794 | 0.977450794 | -5.631459565 |
| 1437999_x_at | 0.002402101  | 9.646199469 | 0.02901378   | 0.977460037 | 0.977460037 | -5.631459899 |
| 1445057_at   | 0.002360077  | 3.990171248 | 0.02900169   | 0.977469426 | 0.977469426 | -5.631460238 |
| 1447059_at   | 0.0021323    | 3.079179388 | 0.028991136  | 0.977477623 | 0.977477623 | -5.631460534 |
| 1450204_a_at | -0.004495307 | 5.882527464 | -0.028974217 | 0.977490763 | 0.977490763 | -5.631461008 |
| 1449700_at   | -0.002816616 | 6.169620024 | -0.028920523 | 0.977532463 | 0.977532463 | -5.631462511 |
| 1417278_a_at | -0.003177847 | 6.830254914 | -0.028903146 | 0.977545959 | 0.977545959 | -5.631462997 |
| 1434493_at   | 0.002574903  | 8.157801498 | 0.028769598  | 0.977649677 | 0.977649677 | -5.631466722 |
| 1460728_s_at | 0.002207855  | 9.281422327 | 0.028744122  | 0.977669462 | 0.977669462 | -5.63146743  |
| 1459122_at   | -0.003527076 | 3.356387676 | -0.028662275 | 0.977733028 | 0.977733028 | -5.631469702 |
| 1451209_at   | 0.002675679  | 10.11798298 | 0.028533479  | 0.977833056 | 0.977833056 | -5.631473264 |
| 1444129_at   | 0.002033435  | 4.509959343 | 0.028530129  | 0.977835658 | 0.977835658 | -5.631473357 |
| 1452917_at   | 0.001726924  | 9.080854589 | 0.028521401  | 0.977842436 | 0.977842436 | -5.631473598 |
| 1440531_at   | -0.002695867 | 4.066456299 | -0.028506419 | 0.977854072 | 0.977854072 | -5.631474011 |
| 1415967_at   | 0.001766095  | 10.15034999 | 0.028505703  | 0.977854628 | 0.977854628 | -5.631474031 |
| 1455226_at   | -0.003324564 | 5.040920704 | -0.028465981 | 0.977885477 | 0.977885477 | -5.631475125 |
| 1433907_at   | 0.005725123  | 6.735551018 | 0.028465363  | 0.977885958 | 0.977885958 | -5.631475142 |
| 1438812_x_at | 0.002889071  | 6.730272508 | 0.028462789  | 0.977887957 | 0.977887957 | -5.631475213 |
| 1421890_at   | 0.003442968  | 7.29570483  | 0.028429731  | 0.977913631 | 0.977913631 | -5.631476122 |
| 1426354_at   | -0.002740081 | 9.005774027 | -0.028367091 | 0.97796228  | 0.97796228  | -5.631477843 |
| 1450753_at   | -0.003484535 | 4.195608559 | -0.02827249  | 0.978035751 | 0.978035751 | -5.631480434 |
| 1443666_at   | -0.00251674  | 3.581550843 | -0.028264039 | 0.978042315 | 0.978042315 | -5.631480665 |
| 1454717_at   | -0.002643998 | 8.301363653 | -0.028233215 | 0.978066254 | 0.978066254 | -5.631481507 |
| 1423995_at   | -0.001919417 | 7.112192354 | -0.028220052 | 0.978076478 | 0.978076478 | -5.631481866 |
| 1432689_at   | -0.002494736 | 3.742506561 | -0.028217689 | 0.978078313 | 0.978078313 | -5.631481931 |
| 1419155_a_at | 0.002947168  | 10.03849893 | 0.028104135  | 0.978166505 | 0.978166505 | -5.631485023 |
| 1424972_at   | -0.002693914 | 4.097647882 | -0.028044117 | 0.978213117 | 0.978213117 | -5.631486653 |
| 1429220_at   | -0.003281151 | 7.659403646 | -0.028020812 | 0.978231218 | 0.978231218 | -5.631487285 |
| 1424053_a_at | -0.00216231  | 10.29839066 | -0.027918121 | 0.978310973 | 0.978310973 | -5.631490062 |
| 1440529_at   | -0.002102222 | 4.883070686 | -0.02790358  | 0.978322267 | 0.978322267 | -5.631490455 |
| 1452844_at   | -0.00322606  | 8.354147941 | -0.027875023 | 0.978344445 | 0.978344445 | -5.631491225 |
| 1415728_at   | -0.002548815 | 8.523500455 | -0.027865889 | 0.978351539 | 0.978351539 | -5.631491471 |
| 1436815_x_at | -0.004643883 | 4.475928091 | -0.027820113 | 0.978387092 | 0.978387092 | -5.631492704 |
| 1432703_at   | -0.003143696 | 3.978103937 | -0.027793726 | 0.978407586 | 0.978407586 | -5.631493414 |
| 1433921_s_at | -0.002111567 | 7.759042353 | -0.027791729 | 0.978409136 | 0.978409136 | -5.631493467 |
| 1447914_x_at | -0.003511295 | 3.915940692 | -0.027737462 | 0.978451284 | 0.978451284 | -5.631494924 |
| 1446263_at   | -0.001901899 | 3.715949201 | -0.027715099 | 0.978468652 | 0.978468652 | -5.631495524 |
| 1439214_a_at | 0.002312334  | 8.023478023 | 0.027652627  | 0.978517172 | 0.978517172 | -5.631497197 |
| 1425752_at   | -0.002598283 | 3.682340827 | -0.027615052 | 0.978546355 | 0.978546355 | -5.631498201 |
| 1415819_a_at | -0.00214029  | 10.50460996 | -0.027609957 | 0.978550312 | 0.978550312 | -5.631498337 |
| 1423269_a_at | 0.002124288  | 8.779722467 | 0.027608395  | 0.978551525 | 0.978551525 | -5.631498379 |
| 1443669_at   | 0.002231705  | 4.237746876 | 0.027599568  | 0.97855838  | 0.97855838  | -5.631498614 |
| 1444584_at   | -0.003055939 | 5.993394424 | -0.02758237  | 0.978571738 | 0.978571738 | -5.631499073 |
| 1459173_at   | -0.00286067  | 3.303398604 | -0.027453528 | 0.978671805 | 0.978671805 | -5.631502502 |
| 1425362_at   | 0.003746313  | 6.41675509  | 0.027420537  | 0.978697428 | 0.978697428 | -5.631503378 |
| 1420697_at   | -0.004852715 | 4.550722366 | -0.027320568 | 0.978775071 | 0.978775071 | -5.631506024 |
| 1447116_at   | -0.002990002 | 3.520257198 | -0.027242499 | 0.978835705 | 0.978835705 | -5.631508084 |
| 1434234_at   | -0.002820596 | 5.688943716 | -0.027220926 | 0.97885246  | 0.97885246  | -5.631508652 |

|              |              |             |              |             |             |              |
|--------------|--------------|-------------|--------------|-------------|-------------|--------------|
| 1444901_at   | 0.002494209  | 3.698158268 | 0.027207652  | 0.978862769 | 0.978862769 | -5.631509001 |
| 1439188_at   | 0.001746073  | 6.672449282 | 0.027201182  | 0.978867795 | 0.978867795 | -5.631509172 |
| 1430560_at   | -0.003406995 | 6.823249987 | -0.027095539 | 0.978949845 | 0.978949845 | -5.631511945 |
| 1459521_at   | -0.00168751  | 3.122779619 | -0.027085619 | 0.97895755  | 0.97895755  | -5.631512205 |
| 1444124_a_at | -0.002167105 | 5.467516464 | -0.027061997 | 0.978975896 | 0.978975896 | -5.631512824 |
| 1444402_at   | -0.002039556 | 6.027680663 | -0.027054423 | 0.978981779 | 0.978981779 | -5.631513022 |
| 1434753_at   | 0.001651846  | 8.440766855 | 0.02702874   | 0.979001726 | 0.979001726 | -5.631513694 |
| 1444206_at   | 0.002218373  | 6.072976739 | 0.0270235    | 0.979005796 | 0.979005796 | -5.631513831 |
| 1446674_at   | -0.002365747 | 6.712405888 | -0.02700879  | 0.979017221 | 0.979017221 | -5.631514215 |
| 1455798_at   | -0.002366428 | 8.18942173  | -0.026987731 | 0.979033577 | 0.979033577 | -5.631514765 |
| 1447852_x_at | 0.0022335    | 8.020812482 | 0.02698322   | 0.979037081 | 0.979037081 | -5.631514883 |
| 1434282_at   | 0.002036452  | 7.019903934 | 0.026907255  | 0.979096081 | 0.979096081 | -5.631516862 |
| 1459476_s_at | 0.001660059  | 8.260254655 | 0.026894917  | 0.979105664 | 0.979105664 | -5.631517183 |
| 1418732_s_at | 0.002091999  | 7.389472191 | 0.026884342  | 0.979113877 | 0.979113877 | -5.631517458 |
| 1459764_x_at | -0.002316304 | 3.775954293 | -0.026868007 | 0.979126564 | 0.979126564 | -5.631517883 |
| 1418088_a_at | 0.001827438  | 6.438331397 | 0.026857923  | 0.979134396 | 0.979134396 | -5.631518145 |
| 1455674_at   | 0.002585288  | 6.814997497 | 0.026725295  | 0.979237406 | 0.979237406 | -5.631521581 |
| 1446952_at   | 0.003374024  | 4.017024181 | 0.026703708  | 0.979254172 | 0.979254172 | -5.631522139 |
| 1427971_at   | 0.00230773   | 8.786121942 | 0.026627807  | 0.979313124 | 0.979313124 | -5.631524096 |
| 1445974_at   | 0.001911223  | 3.290862063 | 0.026595775  | 0.979338003 | 0.979338003 | -5.631524921 |
| 1438879_at   | 0.002428593  | 5.082231831 | 0.026595305  | 0.979338368 | 0.979338368 | -5.631524933 |
| 1425546_a_at | 0.003802979  | 7.180263126 | 0.026573392  | 0.979355387 | 0.979355387 | -5.631525496 |
| 1418533_s_at | 0.00250362   | 10.3243614  | 0.02656495   | 0.979361944 | 0.979361944 | -5.631525713 |
| 1436818_a_at | -0.002268547 | 8.938279962 | -0.026556705 | 0.979368348 | 0.979368348 | -5.631525925 |
| 1423839_a_at | 0.004212619  | 10.55618675 | 0.026542906  | 0.979379065 | 0.979379065 | -5.631526279 |
| 1437802_x_at | -0.001837433 | 10.99195293 | -0.026521856 | 0.979395415 | 0.979395415 | -5.63152682  |
| 1432913_at   | 0.001962127  | 3.579709127 | 0.026479495  | 0.979428316 | 0.979428316 | -5.631527905 |
| 1427559_a_at | 0.001733824  | 6.994207091 | 0.026455412  | 0.979447021 | 0.979447021 | -5.631528522 |
| 1439956_at   | -0.002463415 | 3.616101138 | -0.026412917 | 0.979480027 | 0.979480027 | -5.631529608 |
| 1418922_at   | -0.001723873 | 7.109526624 | -0.026366728 | 0.979515901 | 0.979515901 | -5.631530787 |
| 1442123_at   | -0.002562952 | 4.68540843  | -0.026323503 | 0.979549474 | 0.979549474 | -5.631531888 |
| 1426041_a_at | -0.002521833 | 3.79943711  | -0.02632039  | 0.979551892 | 0.979551892 | -5.631531968 |
| 1424054_at   | -0.003031913 | 8.690471869 | -0.026313935 | 0.979556905 | 0.979556905 | -5.631532132 |
| 1452759_s_at | -0.001844388 | 8.502436644 | -0.026254806 | 0.97960283  | 0.97960283  | -5.631533635 |
| 1426312_at   | 0.002072734  | 7.861242802 | 0.026238671  | 0.979615362 | 0.979615362 | -5.631534045 |
| 1439075_at   | 0.002240106  | 7.785558647 | 0.02621995   | 0.979629903 | 0.979629903 | -5.631534519 |
| 1434236_at   | -0.004174553 | 8.314783253 | -0.02620202  | 0.979643829 | 0.979643829 | -5.631534974 |
| 1417960_at   | 0.00245508   | 3.486171173 | 0.026182589  | 0.979658921 | 0.979658921 | -5.631535466 |
| 1421693_a_at | -0.001839228 | 3.262166805 | -0.026120302 | 0.9797073   | 0.9797073   | -5.631537042 |
| 1445981_at   | -0.002002409 | 4.360072672 | -0.026111469 | 0.97971416  | 0.97971416  | -5.631537265 |
| 1426303_at   | 0.001718705  | 6.28165472  | 0.026108586  | 0.979716399 | 0.979716399 | -5.631537337 |
| 1420072_s_at | 0.002696172  | 4.582212098 | 0.026048241  | 0.979763269 | 0.979763269 | -5.631538859 |
| 1424235_at   | -0.002599291 | 8.422853619 | -0.026016511 | 0.979787914 | 0.979787914 | -5.631539658 |
| 1457133_at   | -0.002381892 | 5.803743946 | -0.026009697 | 0.979793206 | 0.979793206 | -5.63153983  |
| 1441484_at   | -0.002937351 | 5.172405205 | -0.026008934 | 0.979793799 | 0.979793799 | -5.631539849 |
| 1435696_s_at | -0.001797922 | 7.636957099 | -0.025974937 | 0.979820204 | 0.979820204 | -5.631540704 |
| 1453235_at   | -0.00186045  | 5.159557934 | -0.0259692   | 0.97982466  | 0.97982466  | -5.631540848 |
| 1418680_at   | 0.001839114  | 4.744263319 | 0.025901694  | 0.979877092 | 0.979877092 | -5.631542541 |
| 1428943_at   | 0.002266126  | 6.730281941 | 0.025863075  | 0.979907088 | 0.979907088 | -5.631543508 |
| 1424994_at   | -0.002028199 | 5.402836657 | -0.02585963  | 0.979909764 | 0.979909764 | -5.631543594 |
| 1445836_at   | -0.002462538 | 3.891308211 | -0.025836828 | 0.979927474 | 0.979927474 | -5.631544164 |
| 1459223_at   | 0.002084966  | 4.059581878 | 0.025811581  | 0.979947084 | 0.979947084 | -5.631544794 |
| 1418288_at   | -0.003413707 | 6.107377448 | -0.025797687 | 0.979957875 | 0.979957875 | -5.631545141 |

|              |              |             |              |             |             |              |
|--------------|--------------|-------------|--------------|-------------|-------------|--------------|
| 1420883_at   | -0.001724725 | 4.227851535 | -0.025795227 | 0.979959785 | 0.979959785 | -5.631545203 |
| 1448833_at   | -0.002812872 | 7.51575579  | -0.025760977 | 0.979986388 | 0.979986388 | -5.631546056 |
| 1438559_x_at | 0.001943748  | 10.33456314 | 0.025706273  | 0.980028877 | 0.980028877 | -5.631547418 |
| 1442077_at   | 0.003327344  | 6.715911749 | 0.025565386  | 0.980138305 | 0.980138305 | -5.631550911 |
| 1416341_at   | -0.001913258 | 9.517891046 | -0.025491311 | 0.98019584  | 0.98019584  | -5.63155274  |
| 1440419_at   | -0.00190685  | 3.863086647 | -0.025416919 | 0.980253621 | 0.980253621 | -5.631554571 |
| 1435556_at   | 0.001878467  | 7.731807468 | 0.025377135  | 0.980284522 | 0.980284522 | -5.631555548 |
| 1441231_at   | -0.004359041 | 7.604038442 | -0.025291922 | 0.980350708 | 0.980350708 | -5.631557636 |
| 1417293_at   | 0.003532186  | 7.635398236 | 0.025283354  | 0.980357363 | 0.980357363 | -5.631557846 |
| 1432385_a_at | -0.001653829 | 4.951037993 | -0.025247265 | 0.980385394 | 0.980385394 | -5.631558728 |
| 1425690_at   | -0.001837331 | 4.508822368 | -0.025201421 | 0.980421002 | 0.980421002 | -5.631559846 |
| 1431137_at   | -0.002312434 | 5.977221948 | -0.025188254 | 0.980431229 | 0.980431229 | -5.631560167 |
| 1448792_a_at | 0.005945126  | 9.778021556 | 0.025141404  | 0.980467618 | 0.980467618 | -5.631561307 |
| 1449932_at   | 0.002273465  | 9.775618908 | 0.02509035   | 0.980507273 | 0.980507273 | -5.631562547 |
| 1440250_at   | 0.002075635  | 3.655687006 | 0.02506678   | 0.98052558  | 0.98052558  | -5.631563119 |
| 1423284_at   | -0.003257795 | 4.987255332 | -0.025057088 | 0.980533108 | 0.980533108 | -5.631563354 |
| 1427169_at   | 0.002211746  | 7.321530257 | 0.024990784  | 0.980584608 | 0.980584608 | -5.631564959 |
| 1449669_at   | -0.003026741 | 4.283785996 | -0.024932742 | 0.980629691 | 0.980629691 | -5.63156636  |
| 1448266_at   | -0.00190476  | 8.84406879  | -0.024932385 | 0.980629968 | 0.980629968 | -5.631566368 |
| 1439106_at   | 0.001616869  | 8.868289804 | 0.024899919  | 0.980655185 | 0.980655185 | -5.631567151 |
| 1438546_x_at | -0.002070207 | 9.327174691 | -0.024845306 | 0.980697604 | 0.980697604 | -5.631568465 |
| 1425616_a_at | -0.001711309 | 10.50220247 | -0.024779392 | 0.980748801 | 0.980748801 | -5.631570046 |
| 1435622_at   | -0.001688137 | 5.538967333 | -0.024703032 | 0.980808112 | 0.980808112 | -5.631571873 |
| 1441969_at   | -0.002087416 | 5.615547232 | -0.024691619 | 0.980816978 | 0.980816978 | -5.631572146 |
| 1444223_at   | 0.00249137   | 5.574596835 | 0.02466247   | 0.980839618 | 0.980839618 | -5.631572842 |
| 1438008_at   | 0.001973007  | 7.974528112 | 0.024640681  | 0.980856542 | 0.980856542 | -5.631573361 |
| 1447345_at   | -0.002859986 | 5.583096801 | -0.024616068 | 0.98087566  | 0.98087566  | -5.631573947 |
| 1460716_a_at | -0.00145578  | 11.77975628 | -0.024612784 | 0.980878211 | 0.980878211 | -5.631574026 |
| 1447521_x_at | -0.001834365 | 8.966084736 | -0.024610297 | 0.980880143 | 0.980880143 | -5.631574085 |
| 1457938_at   | 0.002621668  | 6.182183426 | 0.024567859  | 0.980913106 | 0.980913106 | -5.631575094 |
| 1428397_at   | -0.002880697 | 4.830195685 | -0.024558685 | 0.980920232 | 0.980920232 | -5.631575312 |
| 1454934_at   | 0.001798778  | 8.205848749 | 0.024517957  | 0.980951866 | 0.980951866 | -5.631576279 |
| 1438198_at   | 0.002962158  | 7.867443932 | 0.024478118  | 0.98098281  | 0.98098281  | -5.631577223 |
| 1440841_at   | 0.001780232  | 8.524774065 | 0.024471956  | 0.980987596 | 0.980987596 | -5.631577368 |
| 1421555_at   | 0.002093012  | 4.121551085 | 0.024411186  | 0.981034799 | 0.981034799 | -5.631578805 |
| 1452948_at   | 0.002165517  | 4.686530341 | 0.024348738  | 0.981083304 | 0.981083304 | -5.631580277 |
| 1432183_at   | 0.00217225   | 6.689527324 | 0.024327674  | 0.981099665 | 0.981099665 | -5.631580773 |
| 1452794_x_at | 0.002469606  | 3.425181721 | 0.024280183  | 0.981136554 | 0.981136554 | -5.631581889 |
| 1427022_at   | 0.001761553  | 8.233593017 | 0.024270528  | 0.981144053 | 0.981144053 | -5.631582116 |
| 1422490_at   | 0.00164389   | 9.703329366 | 0.024258213  | 0.981153618 | 0.981153618 | -5.631582405 |
| 1418140_at   | -0.001761904 | 4.122684091 | -0.024248974 | 0.981160795 | 0.981160795 | -5.631582622 |
| 1455662_x_at | 0.001442846  | 13.51622889 | 0.02424834   | 0.981161287 | 0.981161287 | -5.631582637 |
| 1454303_at   | -0.002146607 | 3.79964933  | -0.024246761 | 0.981162514 | 0.981162514 | -5.631582674 |
| 1441042_at   | 0.001924783  | 4.404790176 | 0.024219995  | 0.981183304 | 0.981183304 | -5.631583301 |
| 1434455_at   | -0.002922278 | 5.216564828 | -0.024199925 | 0.981198893 | 0.981198893 | -5.631583771 |
| 1457056_at   | 0.002287283  | 4.241240453 | 0.024164677  | 0.981226272 | 0.981226272 | -5.631584595 |
| 1442350_at   | 0.002426585  | 5.973660921 | 0.02414365   | 0.981242604 | 0.981242604 | -5.631585087 |
| 1422073_a_at | 0.002154668  | 5.802366881 | 0.024110275  | 0.981268528 | 0.981268528 | -5.631585865 |
| 1427841_at   | -0.002214531 | 4.853348702 | -0.024102062 | 0.981274907 | 0.981274907 | -5.631586057 |
| 1447936_at   | -0.00193484  | 10.6105868  | -0.024092129 | 0.981282623 | 0.981282623 | -5.631586288 |
| 1417137_at   | -0.002326109 | 4.785068751 | -0.024089378 | 0.98128476  | 0.98128476  | -5.631586352 |
| 1416537_at   | -0.002102982 | 7.253687188 | -0.02408846  | 0.981285473 | 0.981285473 | -5.631586374 |
| 1451316_a_at | 0.001583873  | 11.50962694 | 0.024071023  | 0.981299017 | 0.981299017 | -5.63158678  |

|              |              |             |              |             |             |              |
|--------------|--------------|-------------|--------------|-------------|-------------|--------------|
| 1423531_a_at | -0.002305377 | 10.85536234 | -0.024067846 | 0.981301484 | 0.981301484 | -5.631586854 |
| 1442904_at   | -0.00211876  | 4.295986848 | -0.024062258 | 0.981305825 | 0.981305825 | -5.631586984 |
| 1452376_at   | 0.002917987  | 7.002718752 | 0.024058395  | 0.981308825 | 0.981308825 | -5.631587074 |
| 1426344_at   | -0.001597658 | 8.002344453 | -0.023988103 | 0.981363424 | 0.981363424 | -5.631588707 |
| 1423682_a_at | -0.002167955 | 9.845344292 | -0.02398161  | 0.981368467 | 0.981368467 | -5.631588858 |
| 1451980_at   | 0.001659577  | 10.0296904  | 0.023980914  | 0.981369008 | 0.981369008 | -5.631588874 |
| 1426409_at   | -0.002142481 | 9.074005955 | -0.0239565   | 0.981387972 | 0.981387972 | -5.63158944  |
| 1456139_at   | 0.00273141   | 8.216888995 | 0.023934428  | 0.981405116 | 0.981405116 | -5.631589951 |
| 1450710_at   | -0.001842176 | 7.932260106 | -0.023916499 | 0.981419042 | 0.981419042 | -5.631590366 |
| 1457798_at   | 0.002514558  | 4.1246289   | 0.023901731  | 0.981430514 | 0.981430514 | -5.631590707 |
| 1451783_a_at | -0.001646179 | 10.03323315 | -0.023881182 | 0.981446475 | 0.981446475 | -5.631591182 |
| 1452645_x_at | 0.002101705  | 3.016269087 | 0.023871964  | 0.981453635 | 0.981453635 | -5.631591395 |
| 1454798_at   | -0.002012602 | 8.131670832 | -0.023871928 | 0.981453663 | 0.981453663 | -5.631591396 |
| 1439978_at   | -0.002950592 | 3.880713443 | -0.023840632 | 0.981477971 | 0.981477971 | -5.631592118 |
| 1435797_at   | -0.001735278 | 7.612382096 | -0.023833479 | 0.981483528 | 0.981483528 | -5.631592283 |
| 1425496_at   | -0.002167317 | 6.084696155 | -0.023720072 | 0.981571617 | 0.981571617 | -5.631594891 |
| 1448324_at   | 0.002128597  | 10.24656232 | 0.023626377  | 0.981644394 | 0.981644394 | -5.631597036 |
| 1443579_s_at | -0.001883904 | 4.557484838 | -0.023583128 | 0.981677988 | 0.981677988 | -5.631598023 |
| 1448240_at   | 0.001967433  | 10.74437124 | 0.023553306  | 0.981701152 | 0.981701152 | -5.631598703 |
| 1416259_at   | -0.001630357 | 7.387895885 | -0.023548533 | 0.98170486  | 0.98170486  | -5.631598812 |
| 1445060_at   | 0.001889684  | 3.901053787 | 0.023479991  | 0.9817581   | 0.9817581   | -5.63160037  |
| 1439192_at   | 0.002139651  | 6.291800989 | 0.023452064  | 0.981779792 | 0.981779792 | -5.631601004 |
| 1435260_at   | -0.00191704  | 8.169110467 | -0.02344015  | 0.981789047 | 0.981789047 | -5.631601274 |
| 1449760_at   | -0.001825512 | 6.121722694 | -0.023346043 | 0.981862145 | 0.981862145 | -5.631603404 |
| 1444146_at   | -0.002680203 | 4.176619053 | -0.023332476 | 0.981872683 | 0.981872683 | -5.63160371  |
| 1415807_s_at | 0.001473461  | 10.47794568 | 0.023297886  | 0.981899551 | 0.981899551 | -5.63160449  |
| 1438809_at   | -0.001987667 | 7.478275932 | -0.023281569 | 0.981912225 | 0.981912225 | -5.631604857 |
| 1454268_a_at | -0.002762616 | 9.412582818 | -0.023269806 | 0.981921363 | 0.981921363 | -5.631605122 |
| 1438209_at   | -0.001852498 | 5.526724041 | -0.023213616 | 0.981965009 | 0.981965009 | -5.631606385 |
| 1416036_at   | -0.001420253 | 10.6411306  | -0.023180591 | 0.981990661 | 0.981990661 | -5.631607126 |
| 1454178_at   | -0.002142549 | 5.252534693 | -0.023131622 | 0.982028698 | 0.982028698 | -5.631608223 |
| 1415879_a_at | 0.001504811  | 13.74463846 | 0.023110609  | 0.982045021 | 0.982045021 | -5.631608693 |
| 1426338_a_at | -0.001809483 | 6.255474084 | -0.023067768 | 0.982078297 | 0.982078297 | -5.631609649 |
| 1440649_at   | 0.001812628  | 4.296567964 | 0.023059251  | 0.982084913 | 0.982084913 | -5.631609839 |
| 1422858_at   | 0.001797647  | 8.993354499 | 0.023007678  | 0.982124973 | 0.982124973 | -5.631610988 |
| 1432683_at   | 0.002085479  | 5.780241918 | 0.023002504  | 0.982128992 | 0.982128992 | -5.631611103 |
| 1457233_at   | 0.002296191  | 8.565063303 | 0.022994984  | 0.982134834 | 0.982134834 | -5.631611271 |
| 1422281_at   | -0.003058251 | 4.477224825 | -0.022937067 | 0.982179822 | 0.982179822 | -5.631612557 |
| 1449551_at   | -0.003584309 | 7.626815294 | -0.022930328 | 0.982185056 | 0.982185056 | -5.631612707 |
| 1446843_at   | 0.001739841  | 4.233922618 | 0.022880185  | 0.982224006 | 0.982224006 | -5.631613817 |
| 1431641_at   | -0.002283412 | 3.809270633 | -0.022847077 | 0.982249723 | 0.982249723 | -5.631614549 |
| 1418069_at   | 0.001791257  | 3.499956171 | 0.022823418  | 0.982268101 | 0.982268101 | -5.631615072 |
| 1420261_at   | -0.001920608 | 3.552550888 | -0.022815536 | 0.982274222 | 0.982274222 | -5.631615246 |
| 1460506_s_at | 0.002027777  | 10.87786588 | 0.022792784  | 0.982291896 | 0.982291896 | -5.631615748 |
| 1427910_at   | 0.002003364  | 4.692608496 | 0.022771718  | 0.982308259 | 0.982308259 | -5.631616212 |
| 1428749_at   | 0.001804226  | 7.189488567 | 0.022766065  | 0.98231265  | 0.98231265  | -5.631616336 |
| 1429129_at   | -0.002302663 | 6.497521769 | -0.022751006 | 0.982324348 | 0.982324348 | -5.631616668 |
| 1424845_a_at | -0.004432112 | 6.16166859  | -0.022701975 | 0.982362434 | 0.982362434 | -5.631617746 |
| 1453828_at   | 0.001740321  | 4.073065332 | 0.022665572  | 0.982390711 | 0.982390711 | -5.631618544 |
| 1456666_at   | 0.002390352  | 5.980409653 | 0.022627684  | 0.982420141 | 0.982420141 | -5.631619374 |
| 1441951_x_at | 0.002066768  | 3.288974437 | 0.022593263  | 0.982446878 | 0.982446878 | -5.631620127 |
| 1425773_s_at | -0.002956744 | 6.414270473 | -0.02257472  | 0.982461282 | 0.982461282 | -5.631620532 |
| 1420073_s_at | -0.002176807 | 3.313330751 | -0.02257198  | 0.98246341  | 0.98246341  | -5.631620592 |

|              |              |             |              |             |             |              |
|--------------|--------------|-------------|--------------|-------------|-------------|--------------|
| 1430448_at   | 0.005753165  | 4.791625074 | 0.022560722  | 0.982472155 | 0.982472155 | -5.631620837 |
| 1444727_at   | -0.001885276 | 4.394363476 | -0.02252516  | 0.982499778 | 0.982499778 | -5.631621613 |
| 1444115_at   | -0.001902972 | 3.954284354 | -0.022523947 | 0.982500721 | 0.982500721 | -5.631621639 |
| 1439454_x_at | 0.002572085  | 9.238110713 | 0.022481557  | 0.982533648 | 0.982533648 | -5.631622562 |
| 1432934_at   | 0.001727851  | 4.113475974 | 0.022423094  | 0.98257906  | 0.98257906  | -5.631623831 |
| 1439275_s_at | -0.001527119 | 7.223694237 | -0.022398665 | 0.982598036 | 0.982598036 | -5.631624361 |
| 1434033_at   | 0.001593354  | 7.963275797 | 0.022383247  | 0.982610013 | 0.982610013 | -5.631624695 |
| 1430547_s_at | 0.002741765  | 8.266012998 | 0.022381     | 0.982611758 | 0.982611758 | -5.631624743 |
| 1453403_at   | -0.00189151  | 4.848946541 | -0.022358299 | 0.982629392 | 0.982629392 | -5.631625234 |
| 1431246_at   | 0.002060062  | 6.697390125 | 0.022356281  | 0.982630959 | 0.982630959 | -5.631625278 |
| 1450608_at   | -0.002513305 | 4.456140391 | -0.022334065 | 0.982648216 | 0.982648216 | -5.631625758 |
| 1420603_s_at | 0.001737846  | 7.038299131 | 0.022265234  | 0.982701683 | 0.982701683 | -5.631627243 |
| 1421039_at   | 0.002027347  | 4.118262234 | 0.022220978  | 0.98273606  | 0.98273606  | -5.631628195 |
| 1441405_at   | -0.001545505 | 4.679738603 | -0.02216446  | 0.982779962 | 0.982779962 | -5.631629408 |
| 1438810_at   | 0.00157213   | 3.605965533 | 0.022132643  | 0.982804677 | 0.982804677 | -5.631630089 |
| 1422811_at   | -0.001855515 | 6.708590001 | -0.022093955 | 0.982834729 | 0.982834729 | -5.631630917 |
| 1439493_at   | -0.001764051 | 8.150427239 | -0.02207726  | 0.982847697 | 0.982847697 | -5.631631273 |
| 1431700_at   | -0.002296838 | 5.000778239 | -0.022032819 | 0.982882218 | 0.982882218 | -5.631632221 |
| 1449766_at   | 0.001608799  | 3.957482076 | 0.022032007  | 0.982882849 | 0.982882849 | -5.631632239 |
| 1424934_at   | -0.001785641 | 3.501143513 | -0.021978334 | 0.982924542 | 0.982924542 | -5.631633381 |
| 1417437_at   | 0.001552708  | 8.540859744 | 0.021926702  | 0.982964649 | 0.982964649 | -5.631634477 |
| 1452300_at   | 0.002973449  | 3.797227833 | 0.021920006  | 0.98296985  | 0.98296985  | -5.631634619 |
| 1441421_at   | -0.001857769 | 3.479359133 | -0.021900515 | 0.98298499  | 0.98298499  | -5.631635032 |
| 1453123_at   | -0.001541258 | 6.587520103 | -0.021893911 | 0.98299012  | 0.98299012  | -5.631635172 |
| 1433814_at   | 0.001984559  | 5.273276152 | 0.021861066  | 0.983015633 | 0.983015633 | -5.631635867 |
| 1456189_x_at | 0.002950757  | 6.556777151 | 0.021852466  | 0.983022314 | 0.983022314 | -5.631636049 |
| 1416415_a_at | 0.001388946  | 13.20941459 | 0.021827371  | 0.983041807 | 0.983041807 | -5.631636579 |
| 1425896_a_at | 0.002515245  | 10.01181253 | 0.021820293  | 0.983047305 | 0.983047305 | -5.631636728 |
| 1415871_at   | -0.001879271 | 9.548119123 | -0.02180749  | 0.983057251 | 0.983057251 | -5.631636998 |
| 1433654_at   | -0.001661685 | 11.0730792  | -0.021805961 | 0.983058438 | 0.983058438 | -5.631637031 |
| 1432316_at   | -0.001678135 | 5.088339221 | -0.021770386 | 0.983086073 | 0.983086073 | -5.63163778  |
| 1427462_at   | -0.002319884 | 6.212964393 | -0.021692283 | 0.983146742 | 0.983146742 | -5.631639422 |
| 1434724_at   | 0.001858448  | 7.476606034 | 0.021602924  | 0.983216155 | 0.983216155 | -5.631641293 |
| 1438972_x_at | 0.002789005  | 8.50657412  | 0.021561559  | 0.983248287 | 0.983248287 | -5.631642156 |
| 1421321_a_at | 0.001525503  | 8.573066043 | 0.021538065  | 0.983266537 | 0.983266537 | -5.631642646 |
| 1426297_at   | 0.002198235  | 9.782041026 | 0.021439533  | 0.983343076 | 0.983343076 | -5.631644694 |
| 1432461_at   | 0.001580842  | 5.631954325 | 0.021431163  | 0.983349578 | 0.983349578 | -5.631644867 |
| 1426184_a_at | -0.002450397 | 6.694997137 | -0.021385624 | 0.983384952 | 0.983384952 | -5.63164581  |
| 1452896_at   | 0.001564459  | 9.795522549 | 0.021380191  | 0.983389172 | 0.983389172 | -5.631645922 |
| 1437514_at   | 0.002155833  | 4.440450128 | 0.021345295  | 0.983416279 | 0.983416279 | -5.631646643 |
| 1433927_at   | 0.001604888  | 9.730423251 | 0.021316319  | 0.983438788 | 0.983438788 | -5.631647241 |
| 1430657_at   | 0.001456726  | 3.916466525 | 0.021296036  | 0.983454544 | 0.983454544 | -5.631647659 |
| 1437225_x_at | 0.003960496  | 6.41746777  | 0.021200925  | 0.983528425 | 0.983528425 | -5.631649614 |
| 1417699_at   | -0.00148886  | 8.226214669 | -0.021155993 | 0.983563328 | 0.983563328 | -5.631650534 |
| 1459197_at   | -0.001456943 | 5.253097904 | -0.021094422 | 0.983611157 | 0.983611157 | -5.631651792 |
| 1427125_s_at | 0.001390585  | 9.106176675 | 0.02108636   | 0.98361742  | 0.98361742  | -5.631651957 |
| 1436719_at   | -0.001682464 | 5.587271299 | -0.021071366 | 0.983629067 | 0.983629067 | -5.631652262 |
| 1444913_at   | -0.001950023 | 4.045397498 | -0.021065181 | 0.983633872 | 0.983633872 | -5.631652388 |
| 1448776_at   | 0.002113522  | 5.928893048 | 0.02103655   | 0.983656113 | 0.983656113 | -5.631652971 |
| 1434843_at   | -0.001399949 | 9.959954106 | -0.021034172 | 0.983657959 | 0.983657959 | -5.63165302  |
| 1418279_a_at | 0.002124458  | 7.02282397  | 0.021012275  | 0.983674969 | 0.983674969 | -5.631653465 |
| 1447256_at   | 0.002245821  | 3.727507142 | 0.021001361  | 0.983683447 | 0.983683447 | -5.631653687 |
| 1425368_a_at | 0.001412265  | 6.65750154  | 0.02097087   | 0.983707132 | 0.983707132 | -5.631654305 |



|              |              |             |              |             |             |              |
|--------------|--------------|-------------|--------------|-------------|-------------|--------------|
| 1441865_at   | 0.001726373  | 3.60991434  | 0.020956999  | 0.983717907 | 0.983717907 | -5.631654587 |
| 1445388_at   | -0.001508651 | 3.232852342 | -0.020947996 | 0.983724901 | 0.983724901 | -5.631654769 |
| 1419821_s_at | -0.002983218 | 9.499176922 | -0.020858585 | 0.983794356 | 0.983794356 | -5.631656577 |
| 1453626_at   | 0.002371217  | 4.165412332 | 0.020757243  | 0.983873079 | 0.983873079 | -5.631658616 |
| 1436350_at   | -0.002870548 | 7.912182624 | -0.020741527 | 0.983885287 | 0.983885287 | -5.631658932 |
| 1445462_at   | -0.001745898 | 3.829004934 | -0.020729181 | 0.983894877 | 0.983894877 | -5.631659179 |
| 1416565_at   | 0.001341795  | 11.59900644 | 0.020668659  | 0.983941892 | 0.983941892 | -5.631660391 |
| 1416481_s_at | 0.001921912  | 8.638806328 | 0.020666678  | 0.98394343  | 0.98394343  | -5.63166043  |
| 1437240_at   | 0.003299135  | 4.743363281 | 0.020628202  | 0.983973319 | 0.983973319 | -5.631661199 |
| 1457628_at   | -0.002158353 | 6.847913027 | -0.020622397 | 0.983977828 | 0.983977828 | -5.631661315 |
| 1445351_at   | 0.002067887  | 4.632452007 | 0.020618466  | 0.983980882 | 0.983980882 | -5.631661393 |
| 1445781_at   | 0.00180852   | 7.054996659 | 0.020611608  | 0.98398621  | 0.98398621  | -5.63166153  |
| 1456712_at   | -0.002981494 | 6.987358903 | -0.02061026  | 0.983987257 | 0.983987257 | -5.631661557 |
| 1416598_at   | -0.001458406 | 8.823021498 | -0.020585808 | 0.984006251 | 0.984006251 | -5.631662044 |
| 1438395_at   | 0.001514603  | 3.681552325 | 0.020559651  | 0.98402657  | 0.98402657  | -5.631662564 |
| 1420318_at   | -0.001632944 | 6.001816882 | -0.020525892 | 0.984052794 | 0.984052794 | -5.631663235 |
| 1430155_at   | -0.001340578 | 3.387924621 | -0.020508305 | 0.984066456 | 0.984066456 | -5.631663584 |
| 1438837_at   | 0.002839189  | 4.378900435 | 0.020461583  | 0.98410275  | 0.98410275  | -5.63166451  |
| 1450561_a_at | -0.001307169 | 8.566089842 | -0.020404607 | 0.98414701  | 0.98414701  | -5.631665636 |
| 1422298_at   | -0.001389036 | 3.86627946  | -0.020391909 | 0.984156874 | 0.984156874 | -5.631665886 |
| 1434021_at   | -0.001586753 | 8.975921541 | -0.020384674 | 0.984162494 | 0.984162494 | -5.631666029 |
| 1436546_at   | 0.001358024  | 10.1903391  | 0.020359038  | 0.984182408 | 0.984182408 | -5.631666534 |
| 1424107_at   | -0.002096572 | 7.147960835 | -0.020325846 | 0.984208193 | 0.984208193 | -5.631667187 |
| 1439957_at   | -0.001969622 | 5.5991047   | -0.020313549 | 0.984217745 | 0.984217745 | -5.631667429 |
| 1435104_at   | -0.001311133 | 8.116019055 | -0.020278661 | 0.984244847 | 0.984244847 | -5.631668113 |
| 1419261_at   | 0.001732245  | 6.644651364 | 0.020175648  | 0.984324868 | 0.984324868 | -5.631670129 |
| 1416482_at   | 0.001775213  | 8.545304855 | 0.020149667  | 0.984345051 | 0.984345051 | -5.631670635 |
| 1443787_x_at | -0.001542159 | 6.593527811 | -0.02012805  | 0.984361843 | 0.984361843 | -5.631671056 |
| 1421831_at   | -0.001767926 | 5.732429927 | -0.020074672 | 0.984403309 | 0.984403309 | -5.631672094 |
| 1458903_at   | -0.002539289 | 5.814167624 | -0.020014914 | 0.98444973  | 0.98444973  | -5.631673253 |
| 1460461_at   | -0.001522603 | 3.492686916 | -0.019992398 | 0.98446722  | 0.98446722  | -5.631673688 |
| 1421552_at   | 0.001256964  | 3.295941548 | 0.019989062  | 0.984469812 | 0.984469812 | -5.631673753 |
| 1431685_at   | 0.001605162  | 3.220726477 | 0.01997331   | 0.984482049 | 0.984482049 | -5.631674057 |
| 1420619_a_at | -0.002031291 | 8.987801524 | -0.019957009 | 0.984494712 | 0.984494712 | -5.631674372 |
| 1436497_at   | -0.003430242 | 4.954439239 | -0.019937439 | 0.984509914 | 0.984509914 | -5.631674749 |
| 1459864_at   | 0.00190932   | 3.762902269 | 0.019893638  | 0.984543939 | 0.984543939 | -5.631675593 |
| 1433869_at   | -0.001664595 | 7.066357381 | -0.019866532 | 0.984564996 | 0.984564996 | -5.631676114 |
| 1445325_at   | 0.00126108   | 4.984621675 | 0.019781639  | 0.984630943 | 0.984630943 | -5.631677742 |
| 1440120_at   | 0.001319598  | 8.124515256 | 0.01965251   | 0.984731253 | 0.984731253 | -5.631680204 |
| 1443250_at   | 0.00152099   | 4.133386451 | 0.019644684  | 0.984737332 | 0.984737332 | -5.631680353 |
| 1423062_at   | 0.003422234  | 10.94295867 | 0.019644607  | 0.984737392 | 0.984737392 | -5.631680355 |
| 1427996_at   | 0.001681616  | 7.396429505 | 0.019610726  | 0.984763712 | 0.984763712 | -5.631680998 |
| 1443676_at   | -0.001390998 | 3.288516705 | -0.019610571 | 0.984763833 | 0.984763833 | -5.631681001 |
| 1456859_at   | -0.001380343 | 6.043921957 | -0.019588413 | 0.984781046 | 0.984781046 | -5.631681421 |
| 1432694_at   | -0.00191652  | 4.304163026 | -0.019510105 | 0.984841878 | 0.984841878 | -5.631682901 |
| 1460422_at   | 0.001578894  | 4.355918877 | 0.019473581  | 0.98487025  | 0.98487025  | -5.63168359  |
| 1443351_at   | 0.001350318  | 3.487633903 | 0.019453954  | 0.984885497 | 0.984885497 | -5.631683959 |
| 1415972_at   | 0.001699318  | 10.7292722  | 0.019384643  | 0.98493934  | 0.98493934  | -5.631685261 |
| 1453114_at   | -0.001935208 | 7.116355116 | -0.019364249 | 0.984955182 | 0.984955182 | -5.631685643 |
| 1450796_at   | 0.001797799  | 5.709923404 | 0.019339278  | 0.984974581 | 0.984974581 | -5.631686111 |
| 1452944_at   | -0.001651682 | 5.402967925 | -0.019337379 | 0.984976056 | 0.984976056 | -5.631686146 |
| 1427724_at   | -0.001691728 | 4.097732343 | -0.019317545 | 0.984991463 | 0.984991463 | -5.631686517 |
| 1434885_at   | 0.001671337  | 5.811096404 | 0.019296889  | 0.98500751  | 0.98500751  | -5.631686903 |

|              |              |             |              |             |             |              |
|--------------|--------------|-------------|--------------|-------------|-------------|--------------|
| 1454373_x_at | 0.002333197  | 6.972091854 | 0.019268541  | 0.985029532 | 0.985029532 | -5.631687431 |
| 1444541_at   | 0.001572113  | 7.652095645 | 0.019258451  | 0.98503737  | 0.98503737  | -5.631687619 |
| 1445324_s_at | -0.001364059 | 4.888933948 | -0.019245883 | 0.985047133 | 0.985047133 | -5.631687853 |
| 1429710_at   | -0.001776378 | 8.781815818 | -0.01921278  | 0.985072848 | 0.985072848 | -5.631688469 |
| 1421610_at   | 0.001514459  | 3.966705092 | 0.019096888  | 0.985162878 | 0.985162878 | -5.631690616 |
| 1454753_at   | 0.001714687  | 8.114020965 | 0.019079088  | 0.985176705 | 0.985176705 | -5.631690945 |
| 1435164_s_at | -0.003034554 | 9.43575884  | -0.019062612 | 0.985189504 | 0.985189504 | -5.631691249 |
| 1451592_at   | -0.001994024 | 6.773315597 | -0.019052972 | 0.985196993 | 0.985196993 | -5.631691426 |
| 1432142_at   | 0.001370395  | 4.076148523 | 0.019052647  | 0.985197245 | 0.985197245 | -5.631691432 |
| 1439538_at   | 0.001524194  | 5.830538586 | 0.018921564  | 0.985299075 | 0.985299075 | -5.63169384  |
| 1459023_at   | 0.001543651  | 4.56003739  | 0.018861448  | 0.985345776 | 0.985345776 | -5.631694938 |
| 1430619_a_at | -0.001303801 | 7.331909187 | -0.018838925 | 0.985363272 | 0.985363272 | -5.631695349 |
| 1433129_at   | -0.001692809 | 6.16575737  | -0.018809819 | 0.985385883 | 0.985385883 | -5.631695878 |
| 1430866_at   | 0.001492955  | 3.610719561 | 0.018804815  | 0.98538977  | 0.98538977  | -5.63169597  |
| 1455866_x_at | 0.001197972  | 3.220599041 | 0.018782966  | 0.985406744 | 0.985406744 | -5.631696367 |
| 1424956_at   | 0.001679191  | 7.380097753 | 0.01877628   | 0.985411937 | 0.985411937 | -5.631696488 |
| 1456648_at   | -0.001820975 | 5.701724035 | -0.01870085  | 0.985470534 | 0.985470534 | -5.631697855 |
| 1422157_a_at | 0.001517628  | 7.733257234 | 0.018658375  | 0.985503531 | 0.985503531 | -5.631698623 |
| 1427449_a_at | 0.001717803  | 7.496174416 | 0.018653109  | 0.985507622 | 0.985507622 | -5.631698718 |
| 1446245_at   | 0.001301087  | 8.104221875 | 0.018634916  | 0.985521755 | 0.985521755 | -5.631699046 |
| 1441988_at   | -0.001723923 | 6.1860134   | -0.018618504 | 0.985534504 | 0.985534504 | -5.631699341 |
| 1434094_at   | -0.002117134 | 5.539509985 | -0.018589046 | 0.985557388 | 0.985557388 | -5.631699871 |
| 1416216_at   | -0.001629568 | 8.940765057 | -0.018582259 | 0.985562661 | 0.985562661 | -5.631699993 |
| 1419228_at   | 0.00214643   | 6.656453861 | 0.018555134  | 0.985583733 | 0.985583733 | -5.63170048  |
| 1446642_at   | 0.001266628  | 3.301705745 | 0.018526037  | 0.985606337 | 0.985606337 | -5.631701002 |
| 1458727_at   | 0.00177087   | 3.241639376 | 0.018448137  | 0.985666853 | 0.985666853 | -5.631702395 |
| 1455917_at   | -0.00191197  | 5.080697548 | -0.018445738 | 0.985668717 | 0.985668717 | -5.631702438 |
| 1448399_at   | 0.00128382   | 9.619705273 | 0.018423208  | 0.985686219 | 0.985686219 | -5.63170284  |
| 1459320_at   | -0.003244943 | 5.426681364 | -0.018419233 | 0.985689307 | 0.985689307 | -5.63170291  |
| 1436530_at   | -0.001704481 | 5.483290253 | -0.018418796 | 0.985689647 | 0.985689647 | -5.631702918 |
| 1420253_at   | -0.001496645 | 6.307115507 | -0.018346492 | 0.985745815 | 0.985745815 | -5.631704204 |
| 1458357_x_at | -0.001270472 | 5.769654787 | -0.018322628 | 0.985764354 | 0.985764354 | -5.631704627 |
| 1446238_at   | 0.001504029  | 3.90753591  | 0.018318842  | 0.985767295 | 0.985767295 | -5.631704694 |
| 1440688_at   | 0.001765819  | 4.655696336 | 0.018316855  | 0.985768839 | 0.985768839 | -5.631704729 |
| 1425054_a_at | -0.001185829 | 9.742774778 | -0.018257767 | 0.985814742 | 0.985814742 | -5.631705774 |
| 1422176_at   | -0.001350225 | 3.759381672 | -0.018256935 | 0.985815388 | 0.985815388 | -5.631705789 |
| 1438805_at   | 0.001466226  | 4.624207654 | 0.01823533   | 0.985832172 | 0.985832172 | -5.63170617  |
| 1438317_a_at | -0.002061187 | 7.115918935 | -0.01822345  | 0.985841401 | 0.985841401 | -5.63170638  |
| 1446973_at   | 0.001564323  | 3.598984141 | 0.018197288  | 0.985861724 | 0.985861724 | -5.63170684  |
| 1423823_at   | 0.001202565  | 9.325814522 | 0.018181567  | 0.985873937 | 0.985873937 | -5.631707117 |
| 1416808_at   | 0.001271021  | 9.777773076 | 0.018099732  | 0.985937511 | 0.985937511 | -5.631708553 |
| 1424515_at   | 0.001191712  | 9.290446526 | 0.018086419  | 0.985947853 | 0.985947853 | -5.631708786 |
| 1423058_at   | -0.001283806 | 10.47805698 | -0.018060068 | 0.985968324 | 0.985968324 | -5.631709246 |
| 1440903_at   | 0.001398423  | 7.148667093 | 0.018018295  | 0.986000775 | 0.986000775 | -5.631709975 |
| 1431998_at   | -0.0017342   | 3.375236607 | -0.018018253 | 0.986000808 | 0.986000808 | -5.631709976 |
| 1435524_at   | 0.001450018  | 10.6492894  | 0.017994588  | 0.986019192 | 0.986019192 | -5.631710388 |
| 1435731_x_at | -0.001299157 | 6.109535888 | -0.017993623 | 0.986019941 | 0.986019941 | -5.631710405 |
| 1436918_at   | 0.001798842  | 8.464808664 | 0.017988391  | 0.986024006 | 0.986024006 | -5.631710496 |
| 1439103_at   | 0.001246522  | 5.264581535 | 0.017894299  | 0.986097102 | 0.986097102 | -5.631712129 |
| 1420254_at   | 0.002084653  | 3.200837466 | 0.017890539  | 0.986100023 | 0.986100023 | -5.631712194 |
| 1426646_at   | -0.001413415 | 9.276467792 | -0.017888031 | 0.986101971 | 0.986101971 | -5.631712237 |
| 1424545_at   | -0.0011917   | 9.741919648 | -0.017872005 | 0.986114421 | 0.986114421 | -5.631712514 |
| 1452486_a_at | 0.001723611  | 4.723679557 | 0.017866688  | 0.986118551 | 0.986118551 | -5.631712606 |

|              |              |             |              |             |             |              |
|--------------|--------------|-------------|--------------|-------------|-------------|--------------|
| 1422118_at   | 0.001438891  | 3.536492529 | 0.017822665  | 0.986152751 | 0.986152751 | -5.631713366 |
| 1427248_at   | -0.001388131 | 9.118745491 | -0.017821492 | 0.986153662 | 0.986153662 | -5.631713386 |
| 1433207_at   | 0.002505475  | 4.816117251 | 0.017800487  | 0.98616998  | 0.98616998  | -5.631713748 |
| 1421167_at   | 0.00128742   | 6.067817722 | 0.017732717  | 0.986222628 | 0.986222628 | -5.631714913 |
| 1457070_at   | -0.001397804 | 6.326473236 | -0.017711075 | 0.98623944  | 0.98623944  | -5.631715284 |
| 1417077_at   | 0.001428668  | 8.29082438  | 0.017697982  | 0.986249612 | 0.986249612 | -5.631715508 |
| 1433772_at   | -0.002430457 | 9.666023502 | -0.017664774 | 0.98627541  | 0.98627541  | -5.631716076 |
| 1450479_x_at | -0.001325215 | 9.001872705 | -0.017628446 | 0.986303631 | 0.986303631 | -5.631716696 |
| 1458568_at   | 0.001122429  | 4.138631712 | 0.017620025  | 0.986310173 | 0.986310173 | -5.631716839 |
| 1436989_s_at | 0.002628907  | 4.700388603 | 0.017597999  | 0.986327284 | 0.986327284 | -5.631717214 |
| 1457861_at   | -0.001252766 | 3.650325361 | -0.017577452 | 0.986343247 | 0.986343247 | -5.631717564 |
| 1437406_x_at | 0.001545526  | 12.34189332 | 0.01753512   | 0.986376133 | 0.986376133 | -5.631718283 |
| 1445804_at   | -0.001223283 | 7.411052317 | -0.017532595 | 0.986378094 | 0.986378094 | -5.631718325 |
| 1445272_at   | 0.001208703  | 3.555003491 | 0.017498163  | 0.986404843 | 0.986404843 | -5.631718909 |
| 1454152_a_at | 0.001680597  | 3.717077282 | 0.017473644  | 0.986423891 | 0.986423891 | -5.631719323 |
| 1454077_at   | 0.001437234  | 5.172736543 | 0.017449922  | 0.986442319 | 0.986442319 | -5.631719724 |
| 1429755_a_at | 0.00161915   | 4.025647799 | 0.017444488  | 0.986446541 | 0.986446541 | -5.631719816 |
| 1431527_at   | -0.001127703 | 3.868335267 | -0.017374114 | 0.986501212 | 0.986501212 | -5.631721001 |
| 1457735_at   | -0.00169936  | 5.04357126  | -0.017349696 | 0.986520181 | 0.986520181 | -5.631721411 |
| 1430906_at   | 0.001152128  | 3.749499404 | 0.01731743   | 0.986545247 | 0.986545247 | -5.631721952 |
| 1442701_at   | -0.003253824 | 4.859026934 | -0.017303107 | 0.986556374 | 0.986556374 | -5.631722191 |
| 1458481_at   | 0.001711173  | 4.101477774 | 0.017244045  | 0.986602257 | 0.986602257 | -5.631723178 |
| 1460685_at   | 0.001166901  | 8.984184973 | 0.017175787  | 0.986655285 | 0.986655285 | -5.631724314 |
| 1429661_at   | 0.003064123  | 6.723684533 | 0.017110686  | 0.986705859 | 0.986705859 | -5.631725394 |
| 1445825_at   | 0.001054649  | 4.372646074 | 0.017109824  | 0.986706529 | 0.986706529 | -5.631725408 |
| 1435759_at   | 0.001363716  | 3.761140971 | 0.017075403  | 0.986733269 | 0.986733269 | -5.631725977 |
| 1455133_s_at | -0.001286264 | 9.10402031  | -0.017072054 | 0.986735871 | 0.986735871 | -5.631726032 |
| 1437145_s_at | -0.001411501 | 8.157477816 | -0.01702886  | 0.986769427 | 0.986769427 | -5.631726745 |
| 1437874_s_at | -0.001486969 | 8.845908914 | -0.017010625 | 0.986783593 | 0.986783593 | -5.631727045 |
| 1428181_at   | -0.001414472 | 9.744715851 | -0.016965105 | 0.986818957 | 0.986818957 | -5.631727793 |
| 1456229_at   | 0.001184048  | 3.504661734 | 0.016938251  | 0.986839819 | 0.986839819 | -5.631728233 |
| 1438502_x_at | -0.001130655 | 7.3016922   | -0.016907424 | 0.986863767 | 0.986863767 | -5.631728738 |
| 1445483_at   | 0.00238323   | 5.363173169 | 0.01689808   | 0.986871026 | 0.986871026 | -5.63172889  |
| 1432084_at   | 0.001550548  | 4.688978104 | 0.016890265  | 0.986877097 | 0.986877097 | -5.631729018 |
| 1425874_at   | -0.001944965 | 4.465841946 | -0.016772675 | 0.98696845  | 0.98696845  | -5.631730932 |
| 1448701_a_at | 0.002484418  | 8.009122214 | 0.016680607  | 0.987039974 | 0.987039974 | -5.631732422 |
| 1434798_at   | 0.002414741  | 5.410128184 | 0.016663017  | 0.987053639 | 0.987053639 | -5.631732705 |
| 1433330_at   | 0.001370468  | 3.994280004 | 0.016583278  | 0.987115586 | 0.987115586 | -5.631733987 |
| 1451559_a_at | 0.001673776  | 8.928172749 | 0.016569085  | 0.987126613 | 0.987126613 | -5.631734215 |
| 1431415_a_at | 0.001076926  | 9.081047569 | 0.016522419  | 0.987162866 | 0.987162866 | -5.631734962 |
| 1420910_at   | 0.001313709  | 4.562373097 | 0.01650183   | 0.987178861 | 0.987178861 | -5.631735291 |
| 1429046_at   | -0.001104156 | 7.909662265 | -0.016417807 | 0.987244137 | 0.987244137 | -5.631736628 |
| 1436228_at   | -0.001020325 | 8.239788162 | -0.016340415 | 0.987304261 | 0.987304261 | -5.631737854 |
| 1437246_x_at | 0.001318504  | 10.76222728 | 0.016306255  | 0.987330799 | 0.987330799 | -5.631738394 |
| 1460695_a_at | 0.001178995  | 9.829721932 | 0.016275233  | 0.987354899 | 0.987354899 | -5.631738882 |
| 1448562_at   | 0.001715296  | 5.972121816 | 0.016268091  | 0.987360448 | 0.987360448 | -5.631738995 |
| 1445661_at   | 0.001475017  | 4.388496651 | 0.016235122  | 0.98738606  | 0.98738606  | -5.631739513 |
| 1422693_a_at | 0.001269518  | 11.48020987 | 0.016202901  | 0.987411092 | 0.987411092 | -5.631740018 |
| 1421305_x_at | -0.001274917 | 7.746255699 | -0.016186134 | 0.987424118 | 0.987424118 | -5.631740281 |
| 1423212_at   | 0.001840002  | 9.030722666 | 0.016117158  | 0.987477704 | 0.987477704 | -5.631741359 |
| 1459094_at   | 0.001434908  | 4.931745958 | 0.016039596  | 0.987537961 | 0.987537961 | -5.631742565 |
| 1450015_x_at | 0.001765408  | 6.903030473 | 0.016024049  | 0.987550039 | 0.987550039 | -5.631742806 |
| 1452298_a_at | 0.002072391  | 6.077195611 | 0.015980596  | 0.987583797 | 0.987583797 | -5.631743478 |

|              |              |             |              |             |             |              |
|--------------|--------------|-------------|--------------|-------------|-------------|--------------|
| 1445834_at   | -0.001360123 | 4.108326134 | -0.015951696 | 0.987606249 | 0.987606249 | -5.631743925 |
| 1455537_at   | -0.001312753 | 3.547648534 | -0.015948658 | 0.987608609 | 0.987608609 | -5.631743971 |
| 1456957_at   | 0.001132186  | 4.513161112 | 0.015932454  | 0.987621197 | 0.987621197 | -5.631744221 |
| 1450449_a_at | -0.001591831 | 7.985402321 | -0.015925775 | 0.987626386 | 0.987626386 | -5.631744324 |
| 1420018_s_at | -0.001646247 | 3.589905538 | -0.015918119 | 0.987632334 | 0.987632334 | -5.631744442 |
| 1427621_at   | 0.001207519  | 3.362344749 | 0.015911456  | 0.987637511 | 0.987637511 | -5.631744545 |
| 1438563_s_at | 0.001159579  | 9.096500048 | 0.015835465  | 0.987696547 | 0.987696547 | -5.631745711 |
| 1450733_at   | 0.001288941  | 7.105929346 | 0.015818162  | 0.987709989 | 0.987709989 | -5.631745976 |
| 1441031_at   | -0.001314967 | 4.604969612 | -0.015679759 | 0.987817512 | 0.987817512 | -5.631748084 |
| 1441514_at   | -0.001823024 | 4.081408136 | -0.015664859 | 0.987829087 | 0.987829087 | -5.63174831  |
| 1422911_at   | 0.001570486  | 3.927716514 | 0.015558928  | 0.987911384 | 0.987911384 | -5.63174991  |
| 1447591_x_at | 0.001127916  | 3.532667772 | 0.015536956  | 0.987928454 | 0.987928454 | -5.63175024  |
| 1447250_a_at | -0.001360634 | 4.383895139 | -0.015461442 | 0.98798712  | 0.98798712  | -5.631751372 |
| 1419026_at   | -0.001113211 | 8.843394535 | -0.015435301 | 0.988007428 | 0.988007428 | -5.631751763 |
| 1440454_at   | -0.001300976 | 4.146045856 | -0.015427295 | 0.988013648 | 0.988013648 | -5.631751882 |
| 1454551_at   | -0.001273975 | 3.576593283 | -0.015372559 | 0.988056172 | 0.988056172 | -5.631752698 |
| 1431332_a_at | 0.001704717  | 5.916514725 | 0.015336355  | 0.988084298 | 0.988084298 | -5.631753235 |
| 1424120_at   | 0.000973497  | 8.851380295 | 0.015323962  | 0.988093926 | 0.988093926 | -5.631753419 |
| 1452518_a_at | 0.001192344  | 4.142179739 | 0.015299547  | 0.988112895 | 0.988112895 | -5.631753781 |
| 1437146_x_at | 0.001408768  | 8.074318324 | 0.015267321  | 0.988137931 | 0.988137931 | -5.631754257 |
| 1452423_at   | 0.001277782  | 3.382627346 | 0.015248101  | 0.988152863 | 0.988152863 | -5.631754541 |
| 1450012_x_at | 0.001951554  | 11.00172926 | 0.015219273  | 0.988175259 | 0.988175259 | -5.631754965 |
| 1427160_at   | 0.001583688  | 7.400645737 | 0.015183884  | 0.988202752 | 0.988202752 | -5.631755486 |
| 1422015_a_at | -0.001417363 | 8.177934083 | -0.015155106 | 0.988225109 | 0.988225109 | -5.631755908 |
| 1454574_at   | 0.001637871  | 3.549649949 | 0.015107114  | 0.988262394 | 0.988262394 | -5.63175661  |
| 1445033_at   | -0.000928139 | 3.343755245 | -0.015100317 | 0.988267675 | 0.988267675 | -5.631756709 |
| 1442039_at   | -0.001197221 | 6.134931038 | -0.015086486 | 0.98827842  | 0.98827842  | -5.631756911 |
| 1442082_at   | -0.00143292  | 5.498180925 | -0.015086056 | 0.988278754 | 0.988278754 | -5.631756918 |
| 1440537_at   | 0.001169788  | 3.634834977 | 0.015078246  | 0.988284822 | 0.988284822 | -5.631757032 |
| 1453909_at   | 0.001165058  | 5.02227979  | 0.014977174  | 0.988363344 | 0.988363344 | -5.631758501 |
| 1424371_at   | -0.001130019 | 6.187380317 | -0.014965448 | 0.988372454 | 0.988372454 | -5.63175867  |
| 1459281_at   | 0.000941519  | 3.77762894  | 0.014922321  | 0.988405958 | 0.988405958 | -5.631759294 |
| 1423639_at   | 0.001236608  | 5.683487908 | 0.014915084  | 0.988411581 | 0.988411581 | -5.631759398 |
| 1435931_at   | 0.002066696  | 7.363437756 | 0.014891102  | 0.988430213 | 0.988430213 | -5.631759744 |
| 1422593_at   | -0.001012036 | 10.96951361 | -0.014873942 | 0.988443544 | 0.988443544 | -5.631759991 |
| 1426636_a_at | -0.001067325 | 4.191363684 | -0.014869702 | 0.988446839 | 0.988446839 | -5.631760052 |
| 1433400_at   | -0.001526637 | 4.292700661 | -0.014855886 | 0.988457572 | 0.988457572 | -5.63176025  |
| 1452874_at   | 0.001061169  | 10.71616377 | 0.014833322  | 0.988475102 | 0.988475102 | -5.631760574 |
| 1445629_at   | -0.001226424 | 6.548539102 | -0.014795814 | 0.988504241 | 0.988504241 | -5.631761112 |
| 1431799_at   | -0.001501263 | 4.636237652 | -0.014786688 | 0.988511332 | 0.988511332 | -5.631761242 |
| 1445556_at   | 0.001361255  | 4.219360879 | 0.014765079  | 0.98852812  | 0.98852812  | -5.631761551 |
| 1434986_a_at | 0.001309983  | 10.43044308 | 0.014738963  | 0.988548409 | 0.988548409 | -5.631761924 |
| 1435367_at   | 0.001572975  | 4.350025317 | 0.014698935  | 0.988579507 | 0.988579507 | -5.631762494 |
| 1420622_a_at | 0.002286695  | 11.05933594 | 0.014691794  | 0.988585055 | 0.988585055 | -5.631762595 |
| 1456080_a_at | -0.000990935 | 9.688528335 | -0.014689217 | 0.988587057 | 0.988587057 | -5.631762632 |
| 1442280_at   | -0.001034275 | 6.54708525  | -0.014675723 | 0.988597541 | 0.988597541 | -5.631762823 |
| 1432025_at   | -0.001571479 | 4.424691464 | -0.014670271 | 0.988601776 | 0.988601776 | -5.631762901 |
| 1418459_at   | 0.001235314  | 6.619508421 | 0.014633836  | 0.988630082 | 0.988630082 | -5.631763417 |
| 1434358_x_at | -0.001148485 | 13.21308677 | -0.014610362 | 0.988648319 | 0.988648319 | -5.631763749 |
| 1431588_at   | -0.001270191 | 4.070915314 | -0.014605746 | 0.988651905 | 0.988651905 | -5.631763814 |
| 1457191_at   | -0.002256945 | 6.059163154 | -0.014599341 | 0.988656882 | 0.988656882 | -5.631763905 |
| 1434928_at   | 0.00117922   | 7.456204628 | 0.014561119  | 0.988686576 | 0.988686576 | -5.631764444 |
| 1437103_at   | 0.001112743  | 9.29282497  | 0.014559124  | 0.988688126 | 0.988688126 | -5.631764472 |

|                   |              |             |              |             |             |              |
|-------------------|--------------|-------------|--------------|-------------|-------------|--------------|
| 1451063_at        | 0.001358605  | 8.765238714 | 0.01455308   | 0.988692821 | 0.988692821 | -5.631764557 |
| 1434289_at        | 0.001099765  | 7.753546056 | 0.014513799  | 0.988723339 | 0.988723339 | -5.631765109 |
| 1455742_x_at      | -0.00114846  | 12.68724671 | -0.014512691 | 0.9887242   | 0.9887242   | -5.631765125 |
| 1454990_at        | -0.001181766 | 9.350401716 | -0.014495455 | 0.988737591 | 0.988737591 | -5.631765366 |
| 1422968_at        | 0.001399013  | 7.188124986 | 0.014490627  | 0.988741341 | 0.988741341 | -5.631765434 |
| 1428970_at        | -0.000944941 | 8.687851752 | -0.014479855 | 0.98874971  | 0.98874971  | -5.631765585 |
| 1432492_a_at      | -0.001079145 | 5.132888776 | -0.014458974 | 0.988765933 | 0.988765933 | -5.631765877 |
| 1447413_at        | 0.001226199  | 4.487971606 | 0.014450437  | 0.988772565 | 0.988772565 | -5.631765997 |
| 1444048_at        | 0.00167821   | 4.028164862 | 0.014441637  | 0.988779402 | 0.988779402 | -5.63176612  |
| 1443248_at        | -0.001331488 | 5.307517663 | -0.014436862 | 0.988783112 | 0.988783112 | -5.631766186 |
| 1453390_at        | 0.001204553  | 5.107711037 | 0.0144209    | 0.988795512 | 0.988795512 | -5.631766409 |
| 1431447_at        | -0.000902307 | 5.283447016 | -0.014376162 | 0.98883027  | 0.98883027  | -5.631767032 |
| 1439839_at        | -0.001035165 | 6.410371165 | -0.014314299 | 0.988878331 | 0.988878331 | -5.63176789  |
| 1430267_at        | -0.001053675 | 4.050048673 | -0.014283027 | 0.988902626 | 0.988902626 | -5.631768323 |
| 1416336_s_at      | -0.001088625 | 9.910096935 | -0.014281098 | 0.988904125 | 0.988904125 | -5.63176835  |
| 1460410_at        | -0.001560885 | 6.119196722 | -0.014273586 | 0.988909961 | 0.988909961 | -5.631768453 |
| 1435840_x_at      | 0.000916496  | 3.169371337 | 0.014230262  | 0.98894362  | 0.98894362  | -5.63176905  |
| 1438078_at        | 0.001252852  | 5.73440485  | 0.014222678  | 0.988949512 | 0.988949512 | -5.631769155 |
| 1432173_at        | 0.001288711  | 4.311986565 | 0.014140484  | 0.989013368 | 0.989013368 | -5.631770282 |
| 1455739_at        | 0.000937237  | 6.833799459 | 0.014114889  | 0.989033254 | 0.989033254 | -5.631770632 |
| 1440070_at        | 0.001315543  | 4.399793705 | 0.014075485  | 0.989063867 | 0.989063867 | -5.631771169 |
| 1432610_at        | 0.001295091  | 5.088170827 | 0.014058626  | 0.989076964 | 0.989076964 | -5.631771399 |
| 1457705_at        | -0.001596256 | 5.038195415 | -0.014051341 | 0.989082625 | 0.989082625 | -5.631771498 |
| 1422952_at        | 0.001517455  | 5.716758166 | 0.014015753  | 0.989110273 | 0.989110273 | -5.631771981 |
| 1431974_at        | 0.001500733  | 3.908511313 | 0.013984228  | 0.989134765 | 0.989134765 | -5.631772407 |
| 1445309_at        | -0.001317778 | 4.162611396 | -0.013973291 | 0.989143262 | 0.989143262 | -5.631772555 |
| 1418194_at        | 0.001297284  | 7.503359639 | 0.013962367  | 0.989151749 | 0.989151749 | -5.631772703 |
| 1455091_at        | -0.001688778 | 7.283666174 | -0.01396188  | 0.989152127 | 0.989152127 | -5.631772709 |
| 1430868_at        | 0.001210643  | 3.294170799 | 0.013948893  | 0.989162217 | 0.989162217 | -5.631772885 |
| 1451108_at        | -0.001059625 | 8.543577251 | -0.013876736 | 0.989218276 | 0.989218276 | -5.631773856 |
| 1421853_at        | 0.000874746  | 9.250528322 | 0.0138646    | 0.989227705 | 0.989227705 | -5.631774019 |
| 1443261_at        | -0.002185891 | 5.705894546 | -0.013848483 | 0.989240226 | 0.989240226 | -5.631774235 |
| AFFX-r2-Bs-phe-M_ | 0.001993816  | 5.026036089 | 0.013775272  | 0.989297105 | 0.989297105 | -5.631775213 |
| 1450090_at        | -0.0009187   | 9.064295325 | -0.013752387 | 0.989314884 | 0.989314884 | -5.631775517 |
| 1454196_at        | -0.001277086 | 3.272018574 | -0.013725101 | 0.989336083 | 0.989336083 | -5.63177588  |
| 1452490_a_at      | 0.001333001  | 8.063892503 | 0.013723939  | 0.989336986 | 0.989336986 | -5.631775895 |
| 1419720_at        | 0.001101972  | 5.981120045 | 0.013723682  | 0.989337185 | 0.989337185 | -5.631775899 |
| 1434159_at        | -0.000975879 | 8.627686073 | -0.013586242 | 0.989443964 | 0.989443964 | -5.631777714 |
| 1448494_at        | 0.001588472  | 10.16898979 | 0.013568164  | 0.989458009 | 0.989458009 | -5.631777951 |
| 1442962_at        | 0.00126101   | 3.86794792  | 0.013558868  | 0.989465232 | 0.989465232 | -5.631778073 |
| 1416085_s_at      | -0.001232099 | 11.24043467 | -0.013514679 | 0.989499562 | 0.989499562 | -5.631778652 |
| 1424735_at        | -0.001151259 | 7.599777567 | -0.013487714 | 0.989520511 | 0.989520511 | -5.631779004 |
| 1433456_at        | -0.000935532 | 4.601222881 | -0.013476054 | 0.98952957  | 0.98952957  | -5.631779156 |
| 1441369_at        | 0.001065957  | 3.612930254 | 0.013462753  | 0.989539904 | 0.989539904 | -5.631779329 |
| 1454578_at        | 0.001124338  | 3.365732119 | 0.013446655  | 0.989552411 | 0.989552411 | -5.631779539 |
| 1455278_at        | -0.001221031 | 4.441725959 | -0.0134076   | 0.989582754 | 0.989582754 | -5.631780046 |
| 1445548_at        | -0.001061182 | 4.157223028 | -0.013398413 | 0.989589891 | 0.989589891 | -5.631780165 |
| 1423376_a_at      | 0.000821091  | 7.561935234 | 0.013395844  | 0.989591887 | 0.989591887 | -5.631780198 |
| 1432886_at        | 0.000999448  | 3.918659231 | 0.013377893  | 0.989605834 | 0.989605834 | -5.631780431 |
| 1418314_a_at      | 0.002824337  | 6.326069795 | 0.013324027  | 0.989647683 | 0.989647683 | -5.631781126 |
| 1442337_at        | -0.001430101 | 4.503660231 | -0.013307817 | 0.989660277 | 0.989660277 | -5.631781335 |
| 1424301_at        | -0.000987369 | 7.481129078 | -0.013301897 | 0.989664876 | 0.989664876 | -5.631781411 |
| 1459029_at        | 0.001254365  | 3.735868609 | 0.013190369  | 0.989751524 | 0.989751524 | -5.63178284  |

|              |              |             |              |             |             |              |
|--------------|--------------|-------------|--------------|-------------|-------------|--------------|
| 1444177_at   | -0.00106635  | 4.205098155 | -0.013153603 | 0.989780088 | 0.989780088 | -5.631783308 |
| 1444917_at   | 0.002034717  | 4.991347413 | 0.013066141  | 0.989848038 | 0.989848038 | -5.631784417 |
| 1424801_at   | 0.001084453  | 10.22219531 | 0.013049094  | 0.989861283 | 0.989861283 | -5.631784633 |
| 1449262_s_at | -0.001089053 | 7.507280158 | -0.012996097 | 0.989902457 | 0.989902457 | -5.6317853   |
| 1459183_at   | 0.001655205  | 5.928647814 | 0.012972393  | 0.989920873 | 0.989920873 | -5.631785598 |
| 1456444_at   | -0.001110055 | 6.219121612 | -0.012917909 | 0.989963203 | 0.989963203 | -5.63178628  |
| 1444063_at   | -0.0010644   | 4.362499481 | -0.012890085 | 0.98998482  | 0.98998482  | -5.631786627 |
| 1427447_a_at | 0.001146099  | 8.906582993 | 0.012787723  | 0.990064347 | 0.990064347 | -5.631787898 |
| 1451648_a_at | 0.001229183  | 5.358597408 | 0.012755141  | 0.99008966  | 0.99008966  | -5.631788301 |
| 1420175_at   | -0.001544936 | 4.43801927  | -0.012745561 | 0.990097103 | 0.990097103 | -5.631788419 |
| 1445914_at   | -0.000948301 | 7.174549073 | -0.012738819 | 0.990102341 | 0.990102341 | -5.631788502 |
| 1456113_at   | -0.001236323 | 6.867059165 | -0.012702456 | 0.990130592 | 0.990130592 | -5.63178895  |
| 1432342_at   | -0.00095562  | 3.735449766 | -0.012697851 | 0.990134171 | 0.990134171 | -5.631789006 |
| 1418482_at   | -0.000966233 | 7.08955504  | -0.012681118 | 0.99014717  | 0.99014717  | -5.631789212 |
| 1439451_x_at | 0.001331226  | 6.210213059 | 0.012637054  | 0.990181405 | 0.990181405 | -5.631789751 |
| 1443170_at   | -0.001308705 | 6.42671943  | -0.012629328 | 0.990187408 | 0.990187408 | -5.631789845 |
| 1416810_at   | 0.000842729  | 9.221371691 | 0.012618063  | 0.990196159 | 0.990196159 | -5.631789983 |
| 1459675_at   | 0.001496086  | 6.297522075 | 0.012603386  | 0.990207562 | 0.990207562 | -5.631790162 |
| 1457111_at   | -0.00098377  | 8.095148324 | -0.012593499 | 0.990215244 | 0.990215244 | -5.631790282 |
| 1445228_at   | 0.001766583  | 4.548261304 | 0.012510988  | 0.990279348 | 0.990279348 | -5.631791284 |
| 1455443_at   | 0.001624474  | 5.459794833 | 0.012497081  | 0.990290153 | 0.990290153 | -5.631791452 |
| 1437619_x_at | -0.001067147 | 4.936888606 | -0.012480732 | 0.990302856 | 0.990302856 | -5.63179165  |
| 1444606_at   | -0.001212135 | 8.720943807 | -0.012460977 | 0.990318204 | 0.990318204 | -5.631791888 |
| 1446026_at   | -0.001123784 | 4.333568425 | -0.012460947 | 0.990318227 | 0.990318227 | -5.631791889 |
| 1424739_at   | 0.001113575  | 4.317379275 | 0.012423692  | 0.990347171 | 0.990347171 | -5.631792337 |
| 1451139_at   | -0.000899451 | 4.13222416  | -0.012411008 | 0.990357025 | 0.990357025 | -5.631792489 |
| 1452801_at   | -0.000972485 | 6.737414122 | -0.012368325 | 0.990390187 | 0.990390187 | -5.631793001 |
| 1424151_at   | 0.000821984  | 9.476276798 | 0.012344769  | 0.990408488 | 0.990408488 | -5.631793282 |
| 1416452_at   | -0.000729833 | 11.80383559 | -0.012311668 | 0.990434205 | 0.990434205 | -5.631793677 |
| 1416034_at   | -0.001167951 | 10.78331469 | -0.012308477 | 0.990436685 | 0.990436685 | -5.631793715 |
| 1441996_at   | 0.00085004   | 6.246487641 | 0.012286523  | 0.990453741 | 0.990453741 | -5.631793976 |
| 1446416_at   | -0.00100019  | 4.109859332 | -0.012272323 | 0.990464774 | 0.990464774 | -5.631794145 |
| 1454733_at   | -0.000934652 | 6.794417576 | -0.012239537 | 0.990490246 | 0.990490246 | -5.631794533 |
| 1431735_at   | -0.001023195 | 3.751070472 | -0.012212347 | 0.99051137  | 0.99051137  | -5.631794855 |
| 1417742_a_at | 0.001071628  | 8.475356882 | 0.012189737  | 0.990528937 | 0.990528937 | -5.631795122 |
| 1448666_s_at | 0.001140233  | 8.311008956 | 0.012170614  | 0.990543794 | 0.990543794 | -5.631795347 |
| 1440431_at   | -0.00152743  | 8.93924578  | -0.012119684 | 0.990583363 | 0.990583363 | -5.631795945 |
| 1416389_a_at | 0.000782614  | 9.527007834 | 0.01211404   | 0.990587748 | 0.990587748 | -5.631796011 |
| 1459126_at   | 0.001463467  | 5.07841349  | 0.01206058   | 0.990629283 | 0.990629283 | -5.631796636 |
| 1441806_at   | -0.00084006  | 4.042562039 | -0.012042155 | 0.990643597 | 0.990643597 | -5.631796851 |
| 1445106_at   | 0.00125574   | 5.971448413 | 0.011990516  | 0.990683718 | 0.990683718 | -5.631797451 |
| 1455565_at   | -0.001053132 | 7.99292392  | -0.011981227 | 0.990690934 | 0.990690934 | -5.631797559 |
| 1448765_at   | -0.000834778 | 8.758730256 | -0.01198078  | 0.990691282 | 0.990691282 | -5.631797564 |
| 1443447_at   | -0.001345308 | 4.324884961 | -0.011969839 | 0.990699782 | 0.990699782 | -5.631797691 |
| 1434822_at   | -0.000949769 | 9.158704699 | -0.011962805 | 0.990705247 | 0.990705247 | -5.631797772 |
| 1455559_at   | 0.001523517  | 3.759042743 | 0.011948891  | 0.990716057 | 0.990716057 | -5.631797933 |
| 1433326_at   | -0.001139838 | 4.263415848 | -0.01191335  | 0.99074367  | 0.99074367  | -5.631798343 |
| 1443702_at   | -0.001911615 | 5.667518376 | -0.01187435  | 0.990773971 | 0.990773971 | -5.631798792 |
| 1455180_at   | 0.001364263  | 6.597858409 | 0.011843604  | 0.990797858 | 0.990797858 | -5.631799145 |
| 1441511_at   | 0.000972709  | 4.407299988 | 0.011829679  | 0.990808677 | 0.990808677 | -5.631799304 |
| 1432901_at   | -0.001104317 | 6.711047076 | -0.011810929 | 0.990823244 | 0.990823244 | -5.631799518 |
| 1450165_at   | -0.001443227 | 6.751062118 | -0.011794521 | 0.990835992 | 0.990835992 | -5.631799706 |
| 1435854_at   | -0.000997775 | 5.092215399 | -0.01177912  | 0.990847958 | 0.990847958 | -5.631799881 |

|              |              |             |              |             |             |              |
|--------------|--------------|-------------|--------------|-------------|-------------|--------------|
| 1446845_at   | 0.001228236  | 3.173027849 | 0.011763748  | 0.9908599   | 0.9908599   | -5.631800056 |
| 1445091_at   | 0.00127771   | 7.404301559 | 0.01175462   | 0.990866993 | 0.990866993 | -5.63180016  |
| 1416162_at   | -0.000903843 | 9.116489281 | -0.011679306 | 0.990925506 | 0.990925506 | -5.631801014 |
| 1438326_at   | -0.00131678  | 6.541025492 | -0.011656855 | 0.990942949 | 0.990942949 | -5.631801267 |
| 1425989_a_at | -0.00123044  | 5.317316978 | -0.011653498 | 0.990945558 | 0.990945558 | -5.631801305 |
| 1456090_at   | 0.000838613  | 8.109036797 | 0.011627715  | 0.990965589 | 0.990965589 | -5.631801595 |
| 1435213_at   | 0.000851229  | 6.024738131 | 0.011593207  | 0.990992399 | 0.990992399 | -5.631801983 |
| 1418939_at   | -0.001497057 | 6.221064669 | -0.011569878 | 0.991010525 | 0.991010525 | -5.631802244 |
| 1425200_at   | -0.000888864 | 5.94196811  | -0.01155064  | 0.991025471 | 0.991025471 | -5.631802459 |
| 1437544_at   | 0.001182594  | 7.853754243 | 0.011538473  | 0.991034924 | 0.991034924 | -5.631802595 |
| 1447213_at   | -0.000974237 | 4.282865886 | -0.011533925 | 0.991038458 | 0.991038458 | -5.631802646 |
| 1444410_at   | -0.000986495 | 3.946931852 | -0.011529712 | 0.991041731 | 0.991041731 | -5.631802693 |
| 1436169_at   | 0.001658077  | 4.550024169 | 0.011499727  | 0.991065027 | 0.991065027 | -5.631803027 |
| 1438657_x_at | -0.000892507 | 11.97109271 | -0.011466046 | 0.991091196 | 0.991091196 | -5.631803401 |
| 1453546_at   | 0.001208826  | 4.469248012 | 0.011382368  | 0.991156208 | 0.991156208 | -5.631804325 |
| 1428088_at   | -0.001205997 | 5.957787152 | -0.011376895 | 0.99116046  | 0.99116046  | -5.631804385 |
| 1446392_at   | -0.001066765 | 8.009049404 | -0.011347154 | 0.991183566 | 0.991183566 | -5.631804712 |
| 1431564_at   | -0.001009119 | 5.562359962 | -0.011310137 | 0.991212326 | 0.991212326 | -5.631805118 |
| 1417467_a_at | -0.001072683 | 7.935449724 | -0.011291173 | 0.991227061 | 0.991227061 | -5.631805325 |
| 1423688_at   | -0.000997962 | 8.318010592 | -0.011268296 | 0.991244834 | 0.991244834 | -5.631805575 |
| 1431403_a_at | -0.001106759 | 3.89889476  | -0.01125592  | 0.99125445  | 0.99125445  | -5.63180571  |
| 1428519_at   | -0.000844226 | 8.389632646 | -0.011244713 | 0.991263157 | 0.991263157 | -5.631805832 |
| 1442561_at   | 0.001740858  | 7.155621299 | 0.01123668   | 0.991269398 | 0.991269398 | -5.631805919 |
| 1457575_at   | 0.001923017  | 6.860320084 | 0.011196567  | 0.991300564 | 0.991300564 | -5.631806354 |
| 1458679_a_at | 0.000865186  | 8.408302184 | 0.011168043  | 0.991322724 | 0.991322724 | -5.631806663 |
| 1454968_at   | 0.000843026  | 7.585429495 | 0.011152103  | 0.991335109 | 0.991335109 | -5.631806835 |
| 1424185_a_at | -0.000804499 | 12.39480378 | -0.011096765 | 0.991378104 | 0.991378104 | -5.63180743  |
| 1459639_at   | -0.00106838  | 3.655214848 | -0.011091729 | 0.991382016 | 0.991382016 | -5.631807484 |
| 1417424_at   | 0.001478376  | 9.486414964 | 0.011059642  | 0.991406945 | 0.991406945 | -5.631807828 |
| 1424347_at   | 0.000754188  | 8.880155363 | 0.011005369  | 0.991449113 | 0.991449113 | -5.631808407 |
| 1452987_at   | -0.000993866 | 5.720151978 | -0.010957799 | 0.991486071 | 0.991486071 | -5.631808912 |
| 1445647_at   | -0.000847746 | 5.404444024 | -0.010929345 | 0.991508178 | 0.991508178 | -5.631809213 |
| 1433696_at   | 0.000658706  | 10.32424026 | 0.010922408  | 0.991513568 | 0.991513568 | -5.631809287 |
| 1434306_at   | 0.000887364  | 7.522759107 | 0.010898743  | 0.991531955 | 0.991531955 | -5.631809536 |
| 1441212_at   | -0.001277885 | 6.882908342 | -0.010874405 | 0.991550863 | 0.991550863 | -5.631809793 |
| 1449732_at   | 0.00128823   | 8.696750974 | 0.010854328  | 0.991566462 | 0.991566462 | -5.631810004 |
| 1443013_at   | 0.001165652  | 4.627420414 | 0.010810323  | 0.991600652 | 0.991600652 | -5.631810465 |
| 1438244_at   | -0.001005994 | 10.11248071 | -0.010788845 | 0.991617339 | 0.991617339 | -5.631810689 |
| 1430912_a_at | 0.000728979  | 3.82497521  | 0.010706777  | 0.991681101 | 0.991681101 | -5.631811542 |
| 1416932_at   | 0.000708286  | 7.941410262 | 0.010613551  | 0.991753532 | 0.991753532 | -5.631812503 |
| 1436586_x_at | 0.000667078  | 13.63627953 | 0.010613473  | 0.991753593 | 0.991753593 | -5.631812504 |
| 1427077_a_at | -0.000842641 | 8.108127835 | -0.010608786 | 0.991757234 | 0.991757234 | -5.631812552 |
| 1453129_a_at | -0.000955849 | 8.367557435 | -0.010605802 | 0.991759553 | 0.991759553 | -5.631812583 |
| 1431284_a_at | 0.000855538  | 8.501591462 | 0.010545687  | 0.991806259 | 0.991806259 | -5.631813198 |
| 1428249_at   | 0.000965597  | 9.101524723 | 0.010538674  | 0.991811707 | 0.991811707 | -5.631813269 |
| 1446729_at   | 0.00102304   | 5.118040983 | 0.010498781  | 0.991842702 | 0.991842702 | -5.631813675 |
| 1444232_at   | -0.000801534 | 8.891864112 | -0.010460998 | 0.991872057 | 0.991872057 | -5.631814058 |
| 1454329_at   | 0.000741228  | 4.830016884 | 0.010363819  | 0.99194756  | 0.99194756  | -5.631815037 |
| 1455947_at   | -0.001224531 | 4.069181678 | -0.010348298 | 0.991959619 | 0.991959619 | -5.631815192 |
| 1426157_a_at | -0.00103261  | 4.712953539 | -0.010266499 | 0.992023172 | 0.992023172 | -5.631816008 |
| 1457033_at   | 0.000905339  | 4.35408598  | 0.010168422  | 0.992099373 | 0.992099373 | -5.631816977 |
| 1435238_x_at | -0.000858299 | 9.156398794 | -0.010137336 | 0.992123525 | 0.992123525 | -5.631817282 |
| 1456276_at   | -0.001138423 | 4.19127931  | -0.010123    | 0.992134663 | 0.992134663 | -5.631817423 |

|              |              |             |              |             |             |              |
|--------------|--------------|-------------|--------------|-------------|-------------|--------------|
| 1452308_a_at | -0.001176872 | 5.152290414 | -0.01010959  | 0.992145082 | 0.992145082 | -5.631817554 |
| 1418328_at   | 0.00105635   | 4.932060838 | 0.010109454  | 0.992145188 | 0.992145188 | -5.631817555 |
| 1418851_at   | -0.000786673 | 8.145976403 | -0.010081421 | 0.992166968 | 0.992166968 | -5.631817829 |
| 1443067_at   | -0.000767264 | 4.053412005 | -0.010070009 | 0.992175835 | 0.992175835 | -5.63181794  |
| 1455656_at   | -0.001160576 | 5.023207555 | -0.010061704 | 0.992182287 | 0.992182287 | -5.631818021 |
| 1430678_at   | 0.000970064  | 3.424928441 | 0.010049869  | 0.992191482 | 0.992191482 | -5.631818136 |
| 1449076_x_at | 0.000962463  | 7.765998997 | 0.010032175  | 0.992205229 | 0.992205229 | -5.631818308 |
| 1436742_a_at | 0.000685791  | 3.498303157 | 0.009995816  | 0.992233479 | 0.992233479 | -5.63181866  |
| 1418558_at   | -0.000599689 | 4.648386302 | -0.00998365  | 0.992242931 | 0.992242931 | -5.631818778 |
| 1416694_at   | 0.000814039  | 3.344402121 | 0.009965916  | 0.99225671  | 0.99225671  | -5.631818949 |
| 1429422_at   | 0.000733233  | 5.563884278 | 0.009892464  | 0.992313778 | 0.992313778 | -5.631819654 |
| 1447115_at   | -0.000687304 | 4.464192976 | -0.00983578  | 0.992357819 | 0.992357819 | -5.631820195 |
| 1421645_at   | 0.000735731  | 4.917402972 | 0.009825184  | 0.992366051 | 0.992366051 | -5.631820296 |
| 1448441_at   | 0.000721016  | 10.65445291 | 0.009805944  | 0.992380999 | 0.992380999 | -5.631820478 |
| 1416209_at   | 0.000772159  | 10.07486116 | 0.009685997  | 0.992474192 | 0.992474192 | -5.631821609 |
| 1452628_at   | 0.000599886  | 8.95721071  | 0.00967983   | 0.992478984 | 0.992478984 | -5.631821667 |
| 1423967_at   | -0.0011266   | 8.13323152  | -0.009676736 | 0.992481388 | 0.992481388 | -5.631821696 |
| 1436834_x_at | -0.001041598 | 11.0131841  | -0.009664758 | 0.992490694 | 0.992490694 | -5.631821808 |
| 1436708_x_at | 0.001319432  | 9.686768698 | 0.009637009  | 0.992512254 | 0.992512254 | -5.631822067 |
| 1443490_at   | 0.000912377  | 7.147594632 | 0.009597345  | 0.992543071 | 0.992543071 | -5.631822436 |
| 1417631_at   | 0.001033851  | 6.966918583 | 0.009591312  | 0.992547758 | 0.992547758 | -5.631822492 |
| 1440681_at   | -0.002297432 | 4.853428878 | -0.009524704 | 0.992599509 | 0.992599509 | -5.631823108 |
| 1450620_at   | -0.000979785 | 4.58622823  | -0.009511889 | 0.992609466 | 0.992609466 | -5.631823226 |
| 1417145_at   | 0.000741347  | 8.730777496 | 0.009443578  | 0.99266254  | 0.99266254  | -5.631823852 |
| 1458182_at   | -0.000788748 | 7.22907444  | -0.00943801  | 0.992666866 | 0.992666866 | -5.631823903 |
| 1451225_at   | 0.000586865  | 10.45867922 | 0.00943191   | 0.992671606 | 0.992671606 | -5.631823958 |
| 1444397_at   | -0.001127691 | 4.425030769 | -0.009427598 | 0.992674956 | 0.992674956 | -5.631823998 |
| 1452063_at   | -0.000712984 | 7.038518018 | -0.00935921  | 0.99272809  | 0.99272809  | -5.631824619 |
| 1456516_x_at | 0.001333693  | 7.233008793 | 0.00935079   | 0.992734633 | 0.992734633 | -5.631824695 |
| 1456164_at   | -0.000862901 | 4.286513791 | -0.009347787 | 0.992736966 | 0.992736966 | -5.631824722 |
| 1427312_at   | -0.000760206 | 6.551594279 | -0.009330734 | 0.992750215 | 0.992750215 | -5.631824876 |
| 1423367_at   | -0.001002315 | 4.452238935 | -0.009316522 | 0.992761257 | 0.992761257 | -5.631825004 |
| 1455284_x_at | 0.0007819    | 3.693358599 | 0.009316503  | 0.992761272 | 0.992761272 | -5.631825005 |
| 1440173_x_at | -0.000691198 | 3.152313114 | -0.009305736 | 0.992769637 | 0.992769637 | -5.631825102 |
| 1442357_at   | 0.00078769   | 3.916765045 | 0.009266835  | 0.992799862 | 0.992799862 | -5.631825451 |
| 1419274_at   | -0.000562302 | 8.300688065 | -0.009248906 | 0.992813792 | 0.992813792 | -5.631825612 |
| 1436154_at   | 0.000811108  | 3.956153    | 0.009217031  | 0.992838557 | 0.992838557 | -5.631825896 |
| 1431217_at   | 0.000722673  | 4.708036394 | 0.00921308   | 0.992841627 | 0.992841627 | -5.631825931 |
| 1426178_at   | 0.000672993  | 3.350421022 | 0.009195211  | 0.99285551  | 0.99285551  | -5.63182609  |
| 1416225_at   | -0.001486733 | 6.963334734 | -0.009181566 | 0.992866112 | 0.992866112 | -5.631826212 |
| 1451869_at   | -0.000620124 | 3.787778975 | -0.009171861 | 0.992873652 | 0.992873652 | -5.631826298 |
| 1449527_at   | -0.001622734 | 6.578317574 | -0.009099074 | 0.992930205 | 0.992930205 | -5.631826941 |
| 1420892_at   | -0.000806782 | 7.523881779 | -0.009081657 | 0.992943736 | 0.992943736 | -5.631827094 |
| 1429989_at   | -0.000756882 | 4.023343077 | -0.009054369 | 0.992964938 | 0.992964938 | -5.631827333 |
| 1436585_at   | -0.000967476 | 7.613200513 | -0.009054196 | 0.992965072 | 0.992965072 | -5.631827335 |
| 1427226_at   | -0.001274138 | 8.060605994 | -0.008974335 | 0.993027121 | 0.993027121 | -5.631828031 |
| 1440624_at   | -0.00196773  | 7.408540802 | -0.008964343 | 0.993034885 | 0.993034885 | -5.631828118 |
| 1421974_at   | -0.000743496 | 3.986532712 | -0.008955369 | 0.993041857 | 0.993041857 | -5.631828196 |
| 1456703_at   | 0.0008513    | 5.517471776 | 0.008953152  | 0.99304358  | 0.99304358  | -5.631828215 |
| 1426455_at   | -0.000605495 | 7.514368184 | -0.008906201 | 0.993080059 | 0.993080059 | -5.63182862  |
| 1423596_at   | -0.000840687 | 8.428509624 | -0.008824753 | 0.99314334  | 0.99314334  | -5.631829319 |
| 1446906_at   | 0.000780441  | 6.055703899 | 0.008800607  | 0.993162101 | 0.993162101 | -5.631829525 |
| 1436215_at   | -0.000831006 | 7.586921913 | -0.008749122 | 0.993202102 | 0.993202102 | -5.631829962 |



|                   |              |             |              |             |             |              |
|-------------------|--------------|-------------|--------------|-------------|-------------|--------------|
| 1457843_at        | 0.001401178  | 6.255530134 | 0.008711455  | 0.993231368 | 0.993231368 | -5.63183028  |
| AFFX-PyruCarbMur/ | -0.000794178 | 7.226429416 | -0.008693192 | 0.993245558 | 0.993245558 | -5.631830433 |
| 1437588_at        | -0.000737482 | 3.706128678 | -0.00865225  | 0.993277368 | 0.993277368 | -5.631830777 |
| 1424677_at        | -0.000898853 | 5.150478452 | -0.00864995  | 0.993279154 | 0.993279154 | -5.631830796 |
| 1433258_at        | 0.000584475  | 3.2501541   | 0.008622874  | 0.993300192 | 0.993300192 | -5.631831022 |
| 1418246_at        | 0.000982717  | 5.491600674 | 0.008569628  | 0.993341562 | 0.993341562 | -5.631831465 |
| 1441474_at        | 0.000719353  | 4.434795116 | 0.008565952  | 0.993344418 | 0.993344418 | -5.631831495 |
| 1443761_at        | 0.000885442  | 3.432169696 | 0.00852919   | 0.99337298  | 0.99337298  | -5.631831799 |
| 1459201_at        | -0.000710588 | 5.796779988 | -0.00849645  | 0.993398418 | 0.993398418 | -5.631832069 |
| 1450135_at        | 0.000599554  | 6.829973311 | 0.008460499  | 0.993426351 | 0.993426351 | -5.631832364 |
| 1433399_at        | -0.000696817 | 3.66041989  | -0.008453206 | 0.993432017 | 0.993432017 | -5.631832423 |
| 1443911_at        | -0.000790005 | 6.605870734 | -0.008434754 | 0.993446354 | 0.993446354 | -5.631832574 |
| 1449966_s_at      | -0.000783568 | 8.061139455 | -0.008389528 | 0.993481492 | 0.993481492 | -5.631832942 |
| 1454247_a_at      | 0.000664638  | 3.735562621 | 0.008316848  | 0.993537962 | 0.993537962 | -5.631833529 |
| 1439193_at        | 0.000724141  | 4.662254626 | 0.008293775  | 0.993555889 | 0.993555889 | -5.631833715 |
| 1431738_at        | 0.000926326  | 4.410930052 | 0.008251798  | 0.993588503 | 0.993588503 | -5.63183405  |
| 1436971_x_at      | -0.000848455 | 11.42562788 | -0.008234776 | 0.993601728 | 0.993601728 | -5.631834186 |
| 1427601_at        | 0.000930535  | 4.492574479 | 0.008191403  | 0.993635428 | 0.993635428 | -5.631834531 |
| 1426870_at        | -0.00123216  | 7.411527902 | -0.008155895 | 0.993663016 | 0.993663016 | -5.631834811 |
| 1439685_at        | 0.000655681  | 4.605774041 | 0.00810931   | 0.993699211 | 0.993699211 | -5.631835178 |
| 1420786_a_at      | 0.000813149  | 3.713678466 | 0.008053944  | 0.993742229 | 0.993742229 | -5.631835611 |
| 1437963_at        | 0.000742516  | 3.719246108 | 0.008040805  | 0.993752437 | 0.993752437 | -5.631835713 |
| 1417364_at        | 0.000473899  | 13.17072146 | 0.008035673  | 0.993756425 | 0.993756425 | -5.631835753 |
| 1425936_a_at      | -0.000688082 | 6.23391376  | -0.008028546 | 0.993761962 | 0.993761962 | -5.631835808 |
| 1421387_at        | -0.000911555 | 5.524441445 | -0.008024878 | 0.993764812 | 0.993764812 | -5.631835837 |
| 1421212_at        | 0.000553854  | 3.853287319 | 0.007934746  | 0.993834841 | 0.993834841 | -5.631836532 |
| 1448414_at        | 0.00065705   | 7.156254551 | 0.007866596  | 0.993887791 | 0.993887791 | -5.631837053 |
| 1446072_at        | -0.000713108 | 3.469457878 | -0.007847404 | 0.993902703 | 0.993902703 | -5.631837199 |
| 1456749_at        | 0.000567581  | 4.740706233 | 0.007842941  | 0.99390617  | 0.99390617  | -5.631837233 |
| 1434123_at        | -0.000561894 | 8.290981553 | -0.007835437 | 0.993912001 | 0.993912001 | -5.63183729  |
| 1458061_at        | 0.000641385  | 3.730733039 | 0.007817999  | 0.993925549 | 0.993925549 | -5.631837422 |
| 1452623_at        | 0.000621718  | 4.709780101 | 0.007811557  | 0.993930554 | 0.993930554 | -5.63183747  |
| 1426878_at        | -0.000517795 | 9.991221067 | -0.007782098 | 0.993953443 | 0.993953443 | -5.631837693 |
| 1456663_x_at      | 0.001031156  | 8.869719141 | 0.007770276  | 0.993962629 | 0.993962629 | -5.631837781 |
| 1433749_at        | -0.000525636 | 9.530454162 | -0.007768475 | 0.993964028 | 0.993964028 | -5.631837795 |
| 1430348_at        | 0.001087073  | 5.221877435 | 0.007762344  | 0.993968791 | 0.993968791 | -5.631837841 |
| 1458488_at        | 0.000735037  | 5.048870014 | 0.007740643  | 0.993985653 | 0.993985653 | -5.631838004 |
| 1446244_at        | 0.001473376  | 5.754403052 | 0.007732753  | 0.993991782 | 0.993991782 | -5.631838063 |
| 1444975_at        | -0.000791346 | 3.902342843 | -0.007687708 | 0.994026781 | 0.994026781 | -5.631838399 |
| 1437219_at        | -0.000570697 | 8.289650921 | -0.007686425 | 0.994027778 | 0.994027778 | -5.631838408 |
| 1453992_at        | -0.000800938 | 3.976890038 | -0.007647774 | 0.994057809 | 0.994057809 | -5.631838695 |
| 1431306_at        | 0.000651065  | 3.546458358 | 0.007609243  | 0.994087746 | 0.994087746 | -5.631838979 |
| 1423111_at        | 0.000521365  | 12.78431745 | 0.007593133  | 0.994100263 | 0.994100263 | -5.631839098 |
| 1451748_a_at      | 0.000595561  | 9.100078051 | 0.007565313  | 0.994121878 | 0.994121878 | -5.631839302 |
| 1456433_at        | -0.000647317 | 9.064871958 | -0.007517841 | 0.994158762 | 0.994158762 | -5.631839648 |
| 1421449_at        | -0.000721602 | 3.366199051 | -0.007498758 | 0.994173589 | 0.994173589 | -5.631839786 |
| 1459954_at        | -0.000631435 | 3.809999396 | -0.007462168 | 0.994202018 | 0.994202018 | -5.631840051 |
| 1436267_a_at      | -0.000458207 | 6.505854212 | -0.007451169 | 0.994210564 | 0.994210564 | -5.63184013  |
| 1417102_a_at      | 0.000614726  | 10.62776996 | 0.007436505  | 0.994221958 | 0.994221958 | -5.631840236 |
| 1418617_x_at      | -0.000880264 | 3.805687655 | -0.007423216 | 0.994232282 | 0.994232282 | -5.631840332 |
| 1434192_at        | -0.000509012 | 7.063625178 | -0.007408004 | 0.994244102 | 0.994244102 | -5.631840441 |
| 1416048_at        | -0.000813938 | 9.403621108 | -0.007376413 | 0.994268647 | 0.994268647 | -5.631840667 |
| 1418066_at        | 0.001251071  | 7.99804278  | 0.007331467  | 0.994303569 | 0.994303569 | -5.631840986 |

|              |              |             |              |             |             |              |
|--------------|--------------|-------------|--------------|-------------|-------------|--------------|
| 1439372_at   | 0.000762489  | 3.704211997 | 0.007293096  | 0.994333381 | 0.994333381 | -5.631841258 |
| 1425685_at   | 0.000646498  | 4.452326777 | 0.007223325  | 0.994387592 | 0.994387592 | -5.631841747 |
| 1442124_at   | 0.000523659  | 7.478424404 | 0.007188372  | 0.994414749 | 0.994414749 | -5.631841991 |
| 1428602_at   | 0.000711105  | 4.341854731 | 0.007164261  | 0.994433482 | 0.994433482 | -5.631842158 |
| 1455364_a_at | -0.000554373 | 13.32219648 | -0.007136874 | 0.994454761 | 0.994454761 | -5.631842348 |
| 1443924_at   | -0.000578431 | 7.024321151 | -0.007124418 | 0.994464439 | 0.994464439 | -5.631842434 |
| 1454643_at   | -0.000525661 | 9.298885023 | -0.007058799 | 0.994515423 | 0.994515423 | -5.631842884 |
| 1430253_at   | 0.000627954  | 4.758335162 | 0.007005682  | 0.994556694 | 0.994556694 | -5.631843245 |
| 1424620_at   | -0.000516735 | 9.177374654 | -0.006956986 | 0.994594529 | 0.994594529 | -5.631843574 |
| 1455852_at   | 0.000660232  | 6.370897369 | 0.006940978  | 0.994606966 | 0.994606966 | -5.631843681 |
| 1424981_at   | 0.000671598  | 6.474095406 | 0.006905865  | 0.994634248 | 0.994634248 | -5.631843917 |
| 1435462_at   | -0.001014767 | 6.058104685 | -0.006898446 | 0.994640013 | 0.994640013 | -5.631843966 |
| 1418193_at   | 0.000567585  | 4.635602913 | 0.006837732  | 0.994687186 | 0.994687186 | -5.631844369 |
| 1447078_at   | 0.000482269  | 3.464941733 | 0.006831953  | 0.994691676 | 0.994691676 | -5.631844408 |
| 1448187_at   | -0.000830233 | 8.446647856 | -0.006829891 | 0.994693278 | 0.994693278 | -5.631844421 |
| 1444143_at   | 0.000616714  | 3.941076269 | 0.006766932  | 0.994742196 | 0.994742196 | -5.631844835 |
| 1439617_s_at | 0.000876583  | 3.586072103 | 0.006762007  | 0.994746022 | 0.994746022 | -5.631844868 |
| 1449815_a_at | 0.000514853  | 10.37410745 | 0.006752332  | 0.994753539 | 0.994753539 | -5.631844931 |
| 1444070_at   | -0.000568928 | 4.780659944 | -0.006747024 | 0.994757663 | 0.994757663 | -5.631844965 |
| 1454728_s_at | -0.000733586 | 7.528655571 | -0.006719733 | 0.994778868 | 0.994778868 | -5.631845143 |
| 1443613_x_at | 0.000690627  | 6.024148429 | 0.006694964  | 0.994798113 | 0.994798113 | -5.631845304 |
| 1454075_s_at | -0.000400188 | 7.29160427  | -0.006681097 | 0.994808887 | 0.994808887 | -5.631845394 |
| 1443443_at   | 0.000432079  | 4.164623437 | 0.006665767  | 0.994820798 | 0.994820798 | -5.631845492 |
| 1442797_x_at | -0.000471348 | 3.567599654 | -0.006603012 | 0.994869557 | 0.994869557 | -5.631845895 |
| 1434674_at   | -0.000534681 | 7.134296901 | -0.006599779 | 0.994872069 | 0.994872069 | -5.631845916 |
| 1425498_at   | -0.000448783 | 9.412476872 | -0.006480023 | 0.994965116 | 0.994965116 | -5.631846673 |
| 1459799_at   | 0.000567761  | 4.025728805 | 0.006468267  | 0.99497425  | 0.99497425  | -5.631846747 |
| 1460379_at   | 0.000401713  | 4.962397759 | 0.00645361   | 0.994985638 | 0.994985638 | -5.631846839 |
| 1419090_x_at | -0.000609473 | 3.423403252 | -0.006428961 | 0.99500479  | 0.99500479  | -5.631846992 |
| 1424236_at   | -0.000701263 | 9.217625494 | -0.00641023  | 0.995019343 | 0.995019343 | -5.631847108 |
| 1451247_at   | 0.000529067  | 8.894110338 | 0.006377921  | 0.995044446 | 0.995044446 | -5.631847308 |
| 1416186_at   | 0.000561232  | 9.306774339 | 0.006361054  | 0.995057551 | 0.995057551 | -5.631847412 |
| 1450423_s_at | 0.000574736  | 7.561189912 | 0.006337902  | 0.99507554  | 0.99507554  | -5.631847554 |
| 1455403_at   | 0.000579759  | 8.007233557 | 0.00630708   | 0.995099488 | 0.995099488 | -5.631847743 |
| 1419408_at   | -0.000714642 | 3.514959142 | -0.0062568   | 0.995138554 | 0.995138554 | -5.631848048 |
| 1422372_at   | 0.000464435  | 5.302482197 | 0.00623547   | 0.995155128 | 0.995155128 | -5.631848177 |
| 1458130_at   | 0.000429189  | 7.517544787 | 0.006213924  | 0.995171868 | 0.995171868 | -5.631848307 |
| 1447875_x_at | 0.000850138  | 4.241319311 | 0.006206077  | 0.995177965 | 0.995177965 | -5.631848354 |
| 1424986_s_at | -0.000652231 | 7.772388114 | -0.00620551  | 0.995178405 | 0.995178405 | -5.631848357 |
| 1450396_at   | -0.000407855 | 8.952217698 | -0.006202996 | 0.995180359 | 0.995180359 | -5.631848372 |
| 1453060_at   | -0.000863195 | 4.185361705 | -0.006174733 | 0.995202319 | 0.995202319 | -5.631848542 |
| 1443041_at   | 0.000564116  | 5.588686368 | 0.00615219   | 0.995219834 | 0.995219834 | -5.631848676 |
| 1440928_at   | -0.000594778 | 7.8772192   | -0.006148683 | 0.995222559 | 0.995222559 | -5.631848697 |
| 1428502_at   | -0.000597907 | 8.365266175 | -0.006140815 | 0.995228672 | 0.995228672 | -5.631848744 |
| 1451637_a_at | 0.000694129  | 3.299910094 | 0.006138277  | 0.995230644 | 0.995230644 | -5.631848759 |
| 1443864_at   | -0.00070393  | 7.003899094 | -0.006002718 | 0.99533597  | 0.99533597  | -5.631849555 |
| 1459614_at   | -0.000523848 | 3.725763692 | -0.005979679 | 0.995353871 | 0.995353871 | -5.631849688 |
| 1444928_at   | 0.000408916  | 3.596606573 | 0.005941982  | 0.995383161 | 0.995383161 | -5.631849906 |
| 1421109_at   | -0.000460193 | 4.323492924 | -0.005926176 | 0.995395441 | 0.995395441 | -5.631849996 |
| 1422025_at   | -0.000447922 | 3.746532293 | -0.005893973 | 0.995420462 | 0.995420462 | -5.63185018  |
| 1460016_at   | 0.000397155  | 7.523218649 | 0.005857753  | 0.995448604 | 0.995448604 | -5.631850386 |
| 1420911_a_at | 0.000447561  | 9.284081549 | 0.005810276  | 0.995485493 | 0.995485493 | -5.631850654 |
| 1451964_at   | -0.000620278 | 3.389394569 | -0.005748057 | 0.995533836 | 0.995533836 | -5.631851002 |

|              |              |             |              |             |             |              |
|--------------|--------------|-------------|--------------|-------------|-------------|--------------|
| 1450206_at   | 0.000420473  | 5.466623411 | 0.005743055  | 0.995537722 | 0.995537722 | -5.63185103  |
| 1419262_at   | -0.000378433 | 8.17304484  | -0.005732821 | 0.995545674 | 0.995545674 | -5.631851086 |
| 1453277_at   | 0.000423743  | 5.05982831  | 0.005721613  | 0.995554382 | 0.995554382 | -5.631851149 |
| 1456405_at   | 0.00039924   | 9.031242377 | 0.005673594  | 0.995591692 | 0.995591692 | -5.631851413 |
| 1430982_at   | -0.000417501 | 10.78425124 | -0.005663286 | 0.995599701 | 0.995599701 | -5.63185147  |
| 1429470_at   | 0.000696066  | 4.083387252 | 0.005578893  | 0.995665272 | 0.995665272 | -5.631851928 |
| 1437773_x_at | 0.000516708  | 12.04866634 | 0.005568719  | 0.995673177 | 0.995673177 | -5.631851983 |
| 1423767_at   | 0.000405819  | 10.10216984 | 0.00556561   | 0.995675593 | 0.995675593 | -5.631852    |
| 1444351_at   | -0.000425746 | 3.423840071 | -0.0055511   | 0.995686867 | 0.995686867 | -5.631852078 |
| 1431160_x_at | 0.000565968  | 4.667744184 | 0.005551094  | 0.995686872 | 0.995686872 | -5.631852078 |
| 1447582_x_at | -0.000475606 | 3.724082937 | -0.00554942  | 0.995688172 | 0.995688172 | -5.631852087 |
| 1418048_at   | 0.000428058  | 9.599797835 | 0.005506999  | 0.995721132 | 0.995721132 | -5.631852314 |
| 1436418_at   | -0.000445416 | 3.177599792 | -0.005452317 | 0.995763619 | 0.995763619 | -5.631852604 |
| 1428208_at   | -0.000382196 | 5.669478964 | -0.005428825 | 0.995781872 | 0.995781872 | -5.631852727 |
| 1444444_at   | -0.000541549 | 4.349583974 | -0.005375818 | 0.995823057 | 0.995823057 | -5.631853004 |
| 1420292_x_at | -0.000398907 | 3.393289476 | -0.005363865 | 0.995832345 | 0.995832345 | -5.631853066 |
| 1432850_at   | -0.000547669 | 7.915831365 | -0.005352972 | 0.995840808 | 0.995840808 | -5.631853123 |
| 1448376_at   | -0.000451555 | 8.21083167  | -0.005279494 | 0.995897899 | 0.995897899 | -5.631853501 |
| 1456650_at   | 0.000411091  | 7.664099843 | 0.005254849  | 0.995917048 | 0.995917048 | -5.631853626 |
| 1455730_at   | 0.000448198  | 8.021231465 | 0.005191087  | 0.995966589 | 0.995966589 | -5.631853948 |
| 1443116_at   | -0.00059225  | 4.993426259 | -0.005175719 | 0.99597853  | 0.99597853  | -5.631854025 |
| 1460588_at   | -0.000555286 | 7.533950716 | -0.005171736 | 0.995981625 | 0.995981625 | -5.631854045 |
| 1423486_at   | 0.000383732  | 9.792663907 | 0.005166934  | 0.995985356 | 0.995985356 | -5.631854069 |
| 1459499_at   | -0.000343524 | 2.966788696 | -0.005069843 | 0.996060793 | 0.996060793 | -5.63185455  |
| 1429396_at   | 0.000450371  | 6.282334179 | 0.005044495  | 0.996080488 | 0.996080488 | -5.631854674 |
| 1420098_s_at | 0.000599583  | 7.399265877 | 0.005039827  | 0.996084115 | 0.996084115 | -5.631854697 |
| 1431808_a_at | 0.000423755  | 3.932093277 | 0.005029446  | 0.996092181 | 0.996092181 | -5.631854747 |
| 1445077_at   | 0.000450723  | 3.847041752 | 0.005000143  | 0.996114949 | 0.996114949 | -5.631854889 |
| 1423327_at   | 0.000854308  | 8.778863757 | 0.004981886  | 0.996129134 | 0.996129134 | -5.631854978 |
| 1453578_at   | 0.000557642  | 4.754203236 | 0.004981151  | 0.996129706 | 0.996129706 | -5.631854981 |
| 1447001_at   | -0.000322862 | 3.36710995  | -0.004969583 | 0.996138693 | 0.996138693 | -5.631855037 |
| 1426374_at   | 0.000324084  | 9.432176391 | 0.004958221  | 0.996147522 | 0.996147522 | -5.631855091 |
| 1417689_a_at | 0.000539792  | 5.155239505 | 0.004921369  | 0.996176155 | 0.996176155 | -5.631855267 |
| 1436984_at   | 0.000417797  | 9.575196077 | 0.004859827  | 0.996223972 | 0.996223972 | -5.631855559 |
| 1433369_at   | 0.000420681  | 6.142352644 | 0.004828468  | 0.996248337 | 0.996248337 | -5.631855705 |
| 1420523_at   | 0.000432245  | 6.057126389 | 0.004811123  | 0.996261814 | 0.996261814 | -5.631855786 |
| 1458610_at   | -0.000443169 | 4.032190988 | -0.00479574  | 0.996273766 | 0.996273766 | -5.631855858 |
| 1428422_at   | 0.000284715  | 8.795657839 | 0.004766028  | 0.996296852 | 0.996296852 | -5.631855995 |
| 1433232_at   | 0.000341473  | 4.401603891 | 0.004750073  | 0.996309249 | 0.996309249 | -5.631856069 |
| 1444333_at   | 0.000488085  | 7.369715639 | 0.004727473  | 0.996326808 | 0.996326808 | -5.631856172 |
| 1450613_x_at | 0.00039718   | 3.448314649 | 0.004715606  | 0.996336029 | 0.996336029 | -5.631856226 |
| 1454961_at   | 0.00048946   | 8.637564579 | 0.004710655  | 0.996339876 | 0.996339876 | -5.631856249 |
| 1460021_at   | 0.00052935   | 4.254733395 | 0.00470217   | 0.996346469 | 0.996346469 | -5.631856288 |
| 1440703_at   | 0.000419902  | 5.790855907 | 0.004671741  | 0.996370112 | 0.996370112 | -5.631856426 |
| 1456552_at   | 0.000608296  | 6.625314746 | 0.004660858  | 0.996378567 | 0.996378567 | -5.631856475 |
| 1432920_at   | 0.00031522   | 3.632559964 | 0.004656825  | 0.996381701 | 0.996381701 | -5.631856493 |
| 1436561_at   | -0.000423675 | 5.540622849 | -0.004654493 | 0.996383513 | 0.996383513 | -5.631856503 |
| 1428916_s_at | -0.000296071 | 7.004663109 | -0.004631937 | 0.996401038 | 0.996401038 | -5.631856605 |
| 1425390_at   | -0.00048184  | 5.96956077  | -0.004607226 | 0.996420238 | 0.996420238 | -5.631856715 |
| 1438053_at   | 0.00052527   | 6.15373795  | 0.004598718  | 0.996426849 | 0.996426849 | -5.631856753 |
| 1431289_at   | -0.000295404 | 7.41055409  | -0.004587885 | 0.996435266 | 0.996435266 | -5.631856801 |
| 1435550_at   | 0.00064784   | 9.010441831 | 0.004509504  | 0.996496166 | 0.996496166 | -5.631857146 |
| 1460674_at   | 0.000482645  | 5.665054856 | 0.004491657  | 0.996510034 | 0.996510034 | -5.631857224 |

|              |              |             |              |             |             |              |
|--------------|--------------|-------------|--------------|-------------|-------------|--------------|
| 1432769_at   | -0.000324575 | 3.833601902 | -0.004437265 | 0.996552295 | 0.996552295 | -5.631857458 |
| 1453132_a_at | 0.000503725  | 5.224398258 | 0.00442099   | 0.996564941 | 0.996564941 | -5.631857528 |
| 1455924_at   | -0.000477127 | 6.778584338 | -0.00440869  | 0.996574497 | 0.996574497 | -5.631857581 |
| 1424516_at   | -0.000339075 | 9.929616102 | -0.004286394 | 0.99666952  | 0.99666952  | -5.631858095 |
| 1432474_a_at | 0.000480622  | 6.943168472 | 0.004267767  | 0.996683993 | 0.996683993 | -5.631858172 |
| 1438859_x_at | -0.000310354 | 13.79098456 | -0.00425381  | 0.996694837 | 0.996694837 | -5.631858229 |
| 1431251_at   | 0.000295409  | 6.412697663 | 0.004228326  | 0.996714637 | 0.996714637 | -5.631858334 |
| 1428934_at   | -0.000302158 | 4.130845564 | -0.004221212 | 0.996720165 | 0.996720165 | -5.631858363 |
| 1430071_at   | -0.000385819 | 3.924683368 | -0.004191388 | 0.996743338 | 0.996743338 | -5.631858484 |
| 1457764_at   | 0.00033302   | 3.495868964 | 0.004066184  | 0.996840619 | 0.996840619 | -5.631858984 |
| 1460260_s_at | 0.000245296  | 8.862714338 | 0.004029492  | 0.996869128 | 0.996869128 | -5.631859128 |
| 1451268_at   | 0.000278661  | 8.252012722 | 0.004024723  | 0.996872834 | 0.996872834 | -5.631859147 |
| 1415915_at   | -0.000244822 | 10.585778   | -0.004016651 | 0.996879105 | 0.996879105 | -5.631859178 |
| 1433511_at   | -0.000459986 | 5.437307562 | -0.004006039 | 0.996887351 | 0.996887351 | -5.631859219 |
| 1427887_at   | 0.000284864  | 8.653262506 | 0.003951805  | 0.99692949  | 0.99692949  | -5.631859428 |
| 1441285_at   | -0.000363742 | 6.554756979 | -0.003946473 | 0.996933632 | 0.996933632 | -5.631859448 |
| 1441945_s_at | -0.000391651 | 9.471291714 | -0.003943934 | 0.996935605 | 0.996935605 | -5.631859458 |
| 1417006_at   | 0.000264946  | 8.59412676  | 0.003910676  | 0.996961446 | 0.996961446 | -5.631859584 |
| 1421708_a_at | 0.000273727  | 6.626310597 | 0.003844799  | 0.997012632 | 0.997012632 | -5.631859831 |
| 1444741_at   | 0.000264119  | 3.881656211 | 0.003837926  | 0.997017972 | 0.997017972 | -5.631859857 |
| 1435952_at   | -0.000332037 | 9.446273264 | -0.003779785 | 0.997063147 | 0.997063147 | -5.631860071 |
| 1423761_at   | -0.00034735  | 6.370164241 | -0.003741406 | 0.997092966 | 0.997092966 | -5.631860211 |
| 1438621_x_at | -0.000331235 | 3.286026843 | -0.003735389 | 0.997097642 | 0.997097642 | -5.631860232 |
| 1425764_a_at | -0.001284132 | 5.660580364 | -0.003643493 | 0.997169043 | 0.997169043 | -5.63186056  |
| 1420869_at   | -0.000271519 | 6.62421273  | -0.003633355 | 0.997176921 | 0.997176921 | -5.631860596 |
| 1416735_at   | 0.000279777  | 9.843552915 | 0.003631692  | 0.997178213 | 0.997178213 | -5.631860602 |
| 1438731_at   | 0.000225372  | 5.998613769 | 0.003623897  | 0.99718427  | 0.99718427  | -5.631860629 |
| 1459855_x_at | -0.000238288 | 4.024536383 | -0.003620987 | 0.997186531 | 0.997186531 | -5.631860639 |
| 1423944_at   | 0.000516939  | 5.089545439 | 0.003509515  | 0.997273143 | 0.997273143 | -5.631861024 |
| 1437459_x_at | 0.000366243  | 3.316152327 | 0.003503367  | 0.99727792  | 0.99727792  | -5.631861045 |
| 1425107_a_at | -0.000391846 | 4.767041158 | -0.003460603 | 0.997311146 | 0.997311146 | -5.631861189 |
| 1451736_a_at | 0.000389776  | 9.540797718 | 0.003439584  | 0.997327478 | 0.997327478 | -5.631861259 |
| 1419900_at   | -0.000363807 | 3.727843635 | -0.003417839 | 0.997344373 | 0.997344373 | -5.631861331 |
| 1447049_at   | -0.000255488 | 3.686075954 | -0.003414985 | 0.997346591 | 0.997346591 | -5.63186134  |
| 1454427_at   | 0.000234103  | 3.941227836 | 0.00340902   | 0.997351226 | 0.997351226 | -5.63186136  |
| 1439551_at   | 0.000297158  | 3.584029274 | 0.003394837  | 0.997362246 | 0.997362246 | -5.631861407 |
| 1420468_at   | -0.000294258 | 3.404433165 | -0.003390285 | 0.997365782 | 0.997365782 | -5.631861422 |
| 1457680_a_at | 0.000249475  | 6.932841547 | 0.003381218  | 0.997372827 | 0.997372827 | -5.631861451 |
| 1452684_at   | 0.000301978  | 8.430454418 | 0.003375036  | 0.997377631 | 0.997377631 | -5.631861472 |
| 1459121_at   | -0.000227165 | 4.249976556 | -0.003374523 | 0.997378029 | 0.997378029 | -5.631861473 |
| 1436241_s_at | -0.000247823 | 6.434043541 | -0.003341    | 0.997404076 | 0.997404076 | -5.631861582 |
| 1422723_at   | -0.000420899 | 5.94479696  | -0.003314371 | 0.997424767 | 0.997424767 | -5.631861668 |
| 1431587_at   | -0.000232816 | 3.317592837 | -0.003313132 | 0.99742573  | 0.99742573  | -5.631861672 |
| 1445492_at   | -0.000249852 | 6.284417507 | -0.003293762 | 0.99744078  | 0.99744078  | -5.631861734 |
| 1451102_at   | 0.0002294    | 9.288537983 | 0.003271168  | 0.997458335 | 0.997458335 | -5.631861805 |
| 1416999_at   | -0.000231355 | 8.941082656 | -0.00322591  | 0.9974935   | 0.9974935   | -5.631861948 |
| 1442006_at   | -0.000445451 | 9.439894419 | -0.003219365 | 0.997498586 | 0.997498586 | -5.631861968 |
| 1439526_at   | -0.000303986 | 7.455433366 | -0.003217282 | 0.997500204 | 0.997500204 | -5.631861975 |
| 1448846_a_at | -0.000187958 | 12.77833211 | -0.00314324  | 0.997557734 | 0.997557734 | -5.631862202 |
| 1430094_at   | -0.000222313 | 3.886999951 | -0.003119556 | 0.997576136 | 0.997576136 | -5.631862274 |
| 1431665_a_at | -0.000244489 | 9.912951125 | -0.003118502 | 0.997576954 | 0.997576954 | -5.631862277 |
| 1445569_at   | 0.000218208  | 3.633165384 | 0.003103931  | 0.997588276 | 0.997588276 | -5.631862321 |
| 1455229_x_at | 0.000276461  | 7.625170486 | 0.003103478  | 0.997588628 | 0.997588628 | -5.631862322 |

|              |              |             |              |             |             |              |
|--------------|--------------|-------------|--------------|-------------|-------------|--------------|
| 1456647_a_at | 0.000244048  | 6.452068985 | 0.003087055  | 0.997601389 | 0.997601389 | -5.631862372 |
| 1424888_at   | -0.000267292 | 8.046198766 | -0.003071493 | 0.99761348  | 0.99761348  | -5.631862418 |
| 1423651_at   | 0.000217384  | 10.40855212 | 0.003067949  | 0.997616234 | 0.997616234 | -5.631862428 |
| 1448532_at   | -0.000277536 | 3.335636023 | -0.003032805 | 0.99764354  | 0.99764354  | -5.631862532 |
| 1439998_at   | -0.000335619 | 7.945292285 | -0.003027502 | 0.99764766  | 0.99764766  | -5.631862548 |
| 1435403_at   | -0.000189176 | 4.71700011  | -0.003008893 | 0.997662119 | 0.997662119 | -5.631862602 |
| 1451116_at   | -0.000210682 | 4.819840532 | -0.00300819  | 0.997662666 | 0.997662666 | -5.631862604 |
| 1419060_at   | 0.000319844  | 4.540590151 | 0.002936903  | 0.997718054 | 0.997718054 | -5.631862809 |
| 1458304_at   | -0.000233412 | 3.465046781 | -0.002894492 | 0.997751007 | 0.997751007 | -5.631862929 |
| 1446390_at   | 0.000280872  | 3.572071319 | 0.002864197  | 0.997774546 | 0.997774546 | -5.631863013 |
| 1438755_at   | 0.000192596  | 6.788468453 | 0.002850925  | 0.997784859 | 0.997784859 | -5.63186305  |
| 1432699_at   | 0.000220112  | 4.612249299 | 0.002798823  | 0.997825341 | 0.997825341 | -5.631863192 |
| 1431620_at   | -0.000260914 | 4.442889128 | -0.002737725 | 0.997872814 | 0.997872814 | -5.631863356 |
| 1442305_at   | -0.000279834 | 7.147524027 | -0.002694879 | 0.997906105 | 0.997906105 | -5.631863468 |
| 1438734_at   | -0.000165211 | 3.6687326   | -0.002694349 | 0.997906516 | 0.997906516 | -5.63186347  |
| 1425853_s_at | -0.000236688 | 3.582230812 | -0.002652805 | 0.997938795 | 0.997938795 | -5.631863577 |
| 1430300_at   | 0.000259949  | 6.6901287   | 0.002610194  | 0.997971904 | 0.997971904 | -5.631863685 |
| 1446246_at   | -0.000162084 | 3.798315238 | -0.002595681 | 0.99798318  | 0.99798318  | -5.631863722 |
| 1456301_at   | 0.000191514  | 4.453853252 | 0.002594707  | 0.997983937 | 0.997983937 | -5.631863724 |
| 1453645_at   | 0.000163287  | 4.030219318 | 0.00251218   | 0.998048059 | 0.998048059 | -5.631863928 |
| 1449194_at   | -0.000256842 | 8.676889326 | -0.002488142 | 0.998066737 | 0.998066737 | -5.631863986 |
| 1440376_at   | 0.000223789  | 5.295007261 | 0.00247705   | 0.998075355 | 0.998075355 | -5.631864013 |
| 1425327_at   | 0.000173463  | 7.777471914 | 0.002416499  | 0.998122402 | 0.998122402 | -5.631864156 |
| 1430457_at   | -0.000180832 | 3.824399918 | -0.002407056 | 0.99812974  | 0.99812974  | -5.631864178 |
| 1422672_at   | 0.000179699  | 3.394033575 | 0.002308103  | 0.998206625 | 0.998206625 | -5.631864404 |
| 1448943_at   | -0.000198581 | 10.40807335 | -0.00230256  | 0.998210932 | 0.998210932 | -5.631864416 |
| 1430268_at   | 0.000282867  | 4.921884012 | 0.00228528   | 0.998224358 | 0.998224358 | -5.631864455 |
| 1450640_x_at | -0.0001489   | 11.85131593 | -0.00227779  | 0.998230178 | 0.998230178 | -5.631864471 |
| 1450776_at   | 0.00017071   | 9.044574976 | 0.002261236  | 0.998243041 | 0.998243041 | -5.631864508 |
| 1457054_a_at | -0.000295111 | 7.277100479 | -0.002235744 | 0.998262848 | 0.998262848 | -5.631864563 |
| 1451706_a_at | -0.000200042 | 3.47339621  | -0.002173812 | 0.998310968 | 0.998310968 | -5.631864695 |
| 1452825_at   | -0.000308877 | 7.260478861 | -0.002143161 | 0.998334784 | 0.998334784 | -5.631864759 |
| 1441497_at   | 0.000215111  | 6.192242458 | 0.002111407  | 0.998359456 | 0.998359456 | -5.631864824 |
| 1458431_at   | -0.000180831 | 5.329113522 | -0.002028135 | 0.998424158 | 0.998424158 | -5.631864991 |
| 1422422_at   | 0.000141223  | 3.848050527 | 0.002020176  | 0.998430342 | 0.998430342 | -5.631865007 |
| 1422831_at   | 0.000199081  | 11.44050428 | 0.001980809  | 0.998460929 | 0.998460929 | -5.631865083 |
| 1454741_s_at | 0.000156283  | 9.001857435 | 0.001977546  | 0.998463465 | 0.998463465 | -5.631865089 |
| 1434712_at   | -0.000163285 | 8.166115804 | -0.001971111 | 0.998468464 | 0.998468464 | -5.631865101 |
| 1442300_at   | 0.000164986  | 5.223281587 | 0.001946112  | 0.998487889 | 0.998487889 | -5.631865149 |
| 1454393_at   | 0.000212446  | 6.591243425 | 0.001913081  | 0.998513553 | 0.998513553 | -5.63186521  |
| 1444599_at   | -0.000205266 | 6.353360086 | -0.00189873  | 0.998524704 | 0.998524704 | -5.631865237 |
| 1442033_at   | 0.000193184  | 4.404676989 | 0.001895359  | 0.998527323 | 0.998527323 | -5.631865243 |
| 1458134_at   | -0.000146837 | 7.194700816 | -0.001841133 | 0.998569456 | 0.998569456 | -5.631865341 |
| 1416046_a_at | 0.00022305   | 7.882180899 | 0.001835933  | 0.998573496 | 0.998573496 | -5.63186535  |
| 1427664_at   | 0.000130626  | 4.077462219 | 0.00179313   | 0.998606754 | 0.998606754 | -5.631865425 |
| 1435587_at   | -0.000110952 | 7.455944842 | -0.001749018 | 0.998641028 | 0.998641028 | -5.631865501 |
| 1447898_s_at | -0.000127942 | 10.85967979 | -0.001732859 | 0.998653584 | 0.998653584 | -5.631865528 |
| 1454773_at   | -0.000135173 | 8.250165006 | -0.001712727 | 0.998669227 | 0.998669227 | -5.631865562 |
| 1421971_a_at | 0.000137539  | 9.55878808  | 0.001694818  | 0.998683142 | 0.998683142 | -5.631865591 |
| 1415996_at   | -0.00013849  | 9.91668013  | -0.001595448 | 0.998760351 | 0.998760351 | -5.631865749 |
| 1433162_at   | 0.00014479   | 4.909666572 | 0.001558243  | 0.998789259 | 0.998789259 | -5.631865806 |
| 1455863_at   | -0.000170071 | 3.493028134 | -0.001547113 | 0.998797907 | 0.998797907 | -5.631865823 |
| 1433389_at   | -0.000157041 | 4.345197148 | -0.001532285 | 0.998809428 | 0.998809428 | -5.631865845 |

|              |              |             |              |             |             |              |
|--------------|--------------|-------------|--------------|-------------|-------------|--------------|
| 1428387_at   | -9.97E-05    | 5.841203836 | -0.00150624  | 0.998829664 | 0.998829664 | -5.631865883 |
| 1448010_at   | 0.000134759  | 5.883717876 | 0.00149549   | 0.998838018 | 0.998838018 | -5.631865899 |
| 1436075_at   | -0.000105433 | 6.390528744 | -0.001485371 | 0.99884588  | 0.99884588  | -5.631865913 |
| 1438315_x_at | -0.000106906 | 9.577780896 | -0.001455106 | 0.998869396 | 0.998869396 | -5.631865956 |
| 1451402_at   | 0.000116045  | 9.387410823 | 0.001448322  | 0.998874666 | 0.998874666 | -5.631865966 |
| 1425465_a_at | 9.55E-05     | 8.45357957  | 0.001445083  | 0.998877183 | 0.998877183 | -5.63186597  |
| 1448786_at   | 0.000158667  | 6.363177176 | 0.001389673  | 0.998920236 | 0.998920236 | -5.631866046 |
| 1416397_at   | 0.000153953  | 6.98843992  | 0.001356406  | 0.998946084 | 0.998946084 | -5.631866091 |
| 1449997_at   | -9.60E-05    | 4.789721636 | -0.001331386 | 0.998965524 | 0.998965524 | -5.631866123 |
| 1436370_at   | -0.000116423 | 3.979178559 | -0.001272373 | 0.999011377 | 0.999011377 | -5.631866197 |
| 1431132_x_at | -8.14E-05    | 7.69929584  | -0.001248314 | 0.999030071 | 0.999030071 | -5.631866227 |
| 1417557_at   | 8.31E-05     | 8.448594247 | 0.001217097  | 0.999054327 | 0.999054327 | -5.631866264 |
| 1449769_at   | 8.71E-05     | 3.120437577 | 0.001177295  | 0.999085252 | 0.999085252 | -5.63186631  |
| 1420848_at   | -0.000120832 | 4.732508169 | -0.001173562 | 0.999088152 | 0.999088152 | -5.631866314 |
| 1430047_at   | -0.000351646 | 6.260985192 | -0.001167522 | 0.999092846 | 0.999092846 | -5.631866321 |
| 1426087_at   | -0.000131642 | 4.086067403 | -0.001159659 | 0.999098955 | 0.999098955 | -5.63186633  |
| 1417717_a_at | 8.91E-05     | 3.852105587 | 0.001143078  | 0.999111838 | 0.999111838 | -5.631866348 |
| 1426345_at   | -7.95E-05    | 8.861701408 | -0.00113379  | 0.999119055 | 0.999119055 | -5.631866359 |
| 1446440_at   | -0.000144599 | 7.114425282 | -0.001089998 | 0.999153081 | 0.999153081 | -5.631866406 |
| 1441944_s_at | -0.000107385 | 6.111017672 | -0.001089087 | 0.999153789 | 0.999153789 | -5.631866407 |
| 1457842_at   | -0.000106328 | 8.56522758  | -0.001085082 | 0.999156901 | 0.999156901 | -5.631866411 |
| 1458414_at   | 0.000118444  | 6.915083114 | 0.001069163  | 0.999169269 | 0.999169269 | -5.631866428 |
| 1444366_at   | -7.22E-05    | 6.967075966 | -0.001054087 | 0.999180983 | 0.999180983 | -5.631866443 |
| 1442462_at   | 9.74E-05     | 5.160446385 | 0.001027122  | 0.999201935 | 0.999201935 | -5.63186647  |
| 1425918_at   | -0.000109463 | 9.418833729 | -0.000908191 | 0.999294344 | 0.999294344 | -5.631866581 |
| 1419573_a_at | 6.23E-05     | 13.04971124 | 0.000877699  | 0.999318035 | 0.999318035 | -5.631866608 |
| 1427171_at   | 6.08E-05     | 8.511267796 | 0.000838251  | 0.999348686 | 0.999348686 | -5.631866641 |
| 1447132_at   | 5.61E-05     | 3.974758994 | 0.000825236  | 0.999358798 | 0.999358798 | -5.631866651 |
| 1433597_at   | 6.31E-05     | 11.66432035 | 0.000773605  | 0.999398915 | 0.999398915 | -5.631866691 |
| 1452400_a_at | -5.40E-05    | 3.606728569 | -0.000771152 | 0.999400821 | 0.999400821 | -5.631866693 |
| 1451860_a_at | 9.20E-05     | 4.591272793 | 0.00070259   | 0.999454093 | 0.999454093 | -5.631866742 |
| 1422432_at   | 5.76E-05     | 9.477080674 | 0.000679376  | 0.99947213  | 0.99947213  | -5.631866757 |
| 1457219_at   | 4.63E-05     | 5.501750837 | 0.000648833  | 0.999495862 | 0.999495862 | -5.631866777 |
| 1437622_x_at | 5.64E-05     | 9.289906021 | 0.000627152  | 0.999512708 | 0.999512708 | -5.63186679  |
| 1433133_at   | -5.71E-05    | 5.587770834 | -0.000538923 | 0.999581262 | 0.999581262 | -5.63186684  |
| 1425895_a_at | -3.36E-05    | 9.793429294 | -0.000491148 | 0.999618382 | 0.999618382 | -5.631866864 |
| 1446634_at   | 6.86E-05     | 3.957968315 | 0.000486498  | 0.999621995 | 0.999621995 | -5.631866866 |
| 1444916_at   | -3.40E-05    | 3.67520164  | -0.000468881 | 0.999635683 | 0.999635683 | -5.631866874 |
| 1451261_s_at | -4.14E-05    | 7.394779195 | -0.000462162 | 0.999640904 | 0.999640904 | -5.631866877 |
| 1451788_at   | 4.14E-05     | 4.115370552 | 0.000449261  | 0.999650928 | 0.999650928 | -5.631866883 |
| 1447876_x_at | -3.34E-05    | 3.229826404 | -0.000384228 | 0.999701458 | 0.999701458 | -5.631866909 |
| 1435161_at   | 2.33E-05     | 7.220301986 | 0.000371387  | 0.999711435 | 0.999711435 | -5.631866914 |
| 1438343_at   | -3.40E-05    | 3.592755737 | -0.00035453  | 0.999724533 | 0.999724533 | -5.63186692  |
| 1417170_at   | -2.68E-05    | 9.237123655 | -0.000293857 | 0.999771676 | 0.999771676 | -5.631866939 |
| 1423536_at   | 2.67E-05     | 9.902145121 | 0.000288719  | 0.999775668 | 0.999775668 | -5.63186694  |
| 1455131_at   | 3.15E-05     | 8.373599042 | 0.000284991  | 0.999778564 | 0.999778564 | -5.631866941 |
| 1457706_at   | -1.90E-05    | 6.996234864 | -0.000239358 | 0.999814021 | 0.999814021 | -5.631866953 |
| 1424615_at   | -2.15E-05    | 8.976311177 | -0.00020518  | 0.999840577 | 0.999840577 | -5.63186696  |
| 1434029_at   | 1.56E-05     | 6.109251905 | 0.000147474  | 0.999885414 | 0.999885414 | -5.63186697  |
| 1416867_at   | -1.02E-05    | 7.879298307 | -0.000137683 | 0.999893022 | 0.999893022 | -5.631866971 |
| 1433436_s_at | -9.57E-06    | 8.12473219  | -0.00013517  | 0.999894974 | 0.999894974 | -5.631866972 |
| 1436491_at   | 1.48E-05     | 5.08821425  | 0.000126306  | 0.999901861 | 0.999901861 | -5.631866973 |
| 1436341_at   | 4.67E-06     | 7.410884317 | 4.76E-05     | 0.999963052 | 0.999963052 | -5.631866979 |

1422156\_a\_at

-7.38E-08

13.8923196

-1.21E-06

0.99999906

0.99999906

-5.63186698
